# Supplementary material for: Proteome Landscape of Epithelial-to-Mesenchymal Transition (EMT) of Retinal Pigment Epithelium Shares Commonalities With Malignancy-Associated EMT
Source: PubMed Central journal article supplement (PMC8482521; doi:10.1016/j.mcpro.2021.100131), 2021-08-27

Supplemental Figure. S16: MS2 spectra for single peptide identifications and phospho STY

RO-QC-160121\_ZackD\_SS\_Set\_01\_Fraction 5062 FTMS; HCl 44.64 484.26 C19orf71

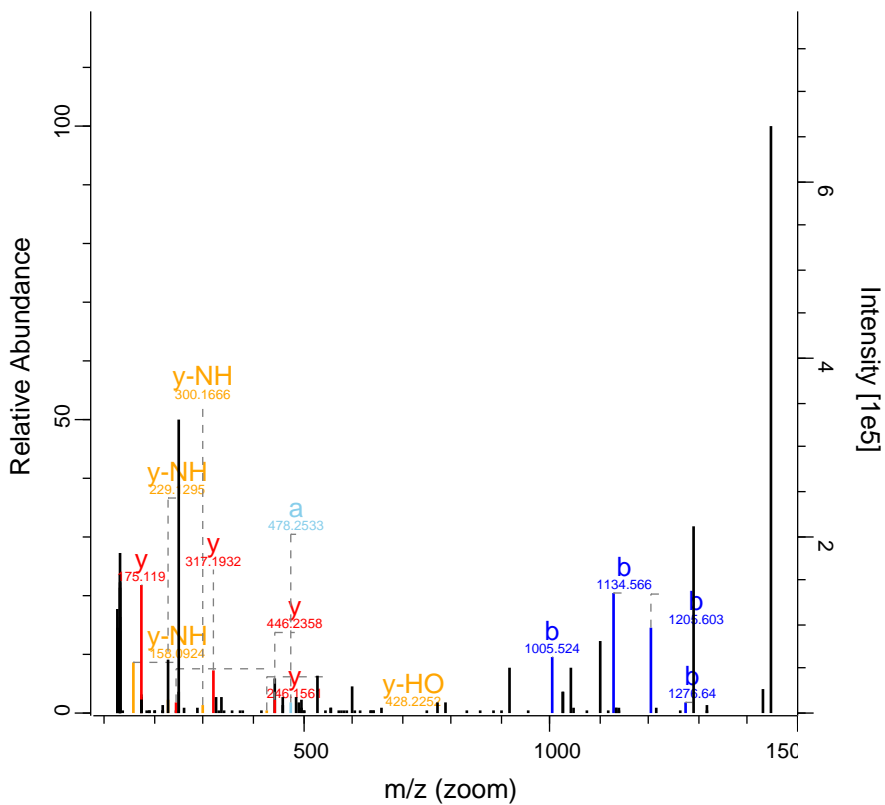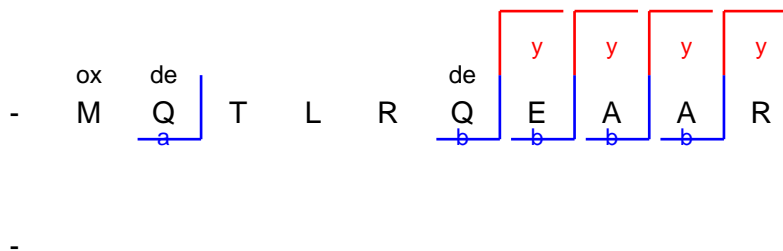

RO-QC-160121\_ZackD\_SS\_Set\_01\_Fraction 5331 FTMS; HCl 47.26 382.19 KCNE5

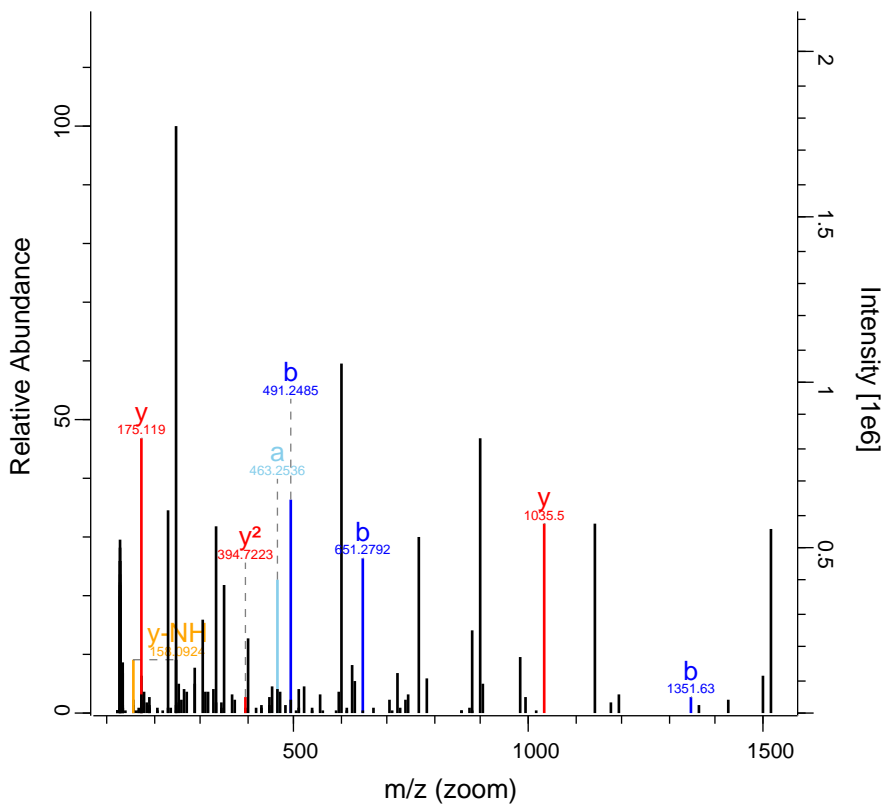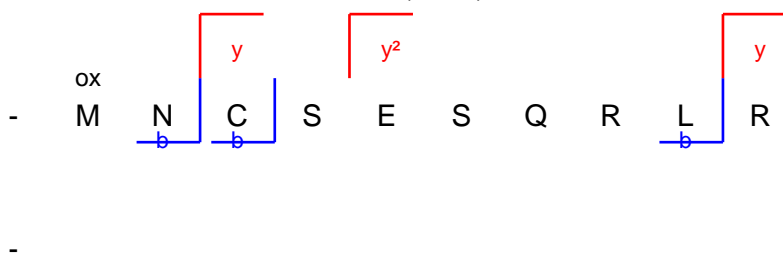

RO-QC-160121\_ZackD\_SS\_Set\_01\_Fraction 5335 FTMS; HCl 61.34 490.9 SPRED2

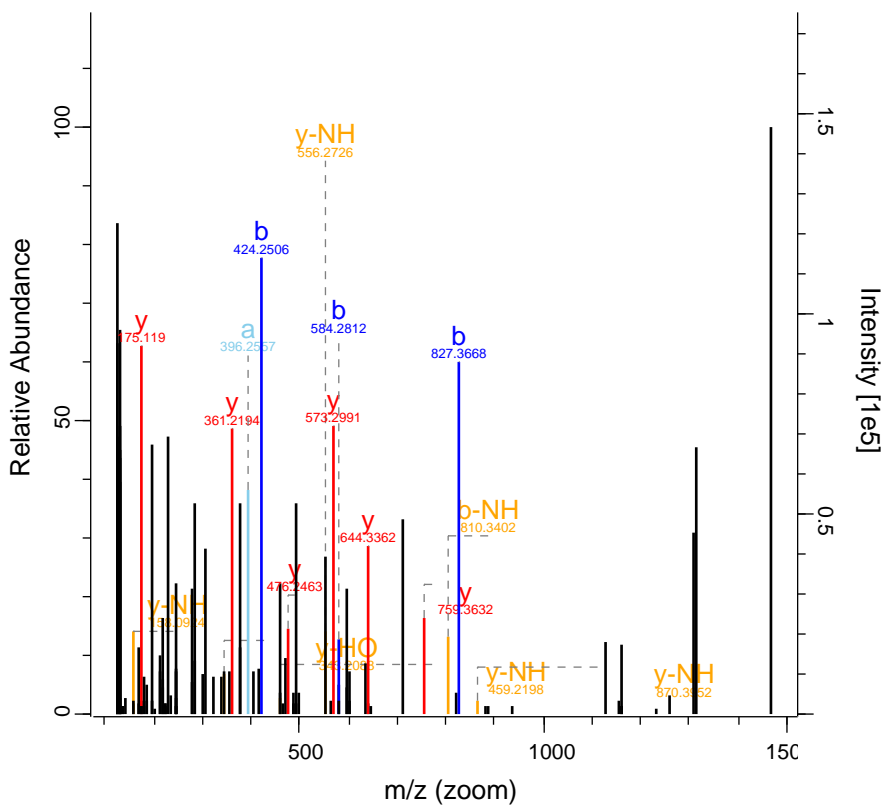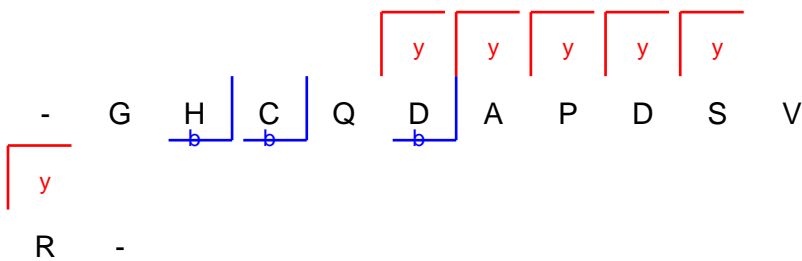

RO-QC-160121\_ZackD\_SS\_Set\_01\_Fraction 6040 FTMS; HCl; 51.53 488.56 WDR25

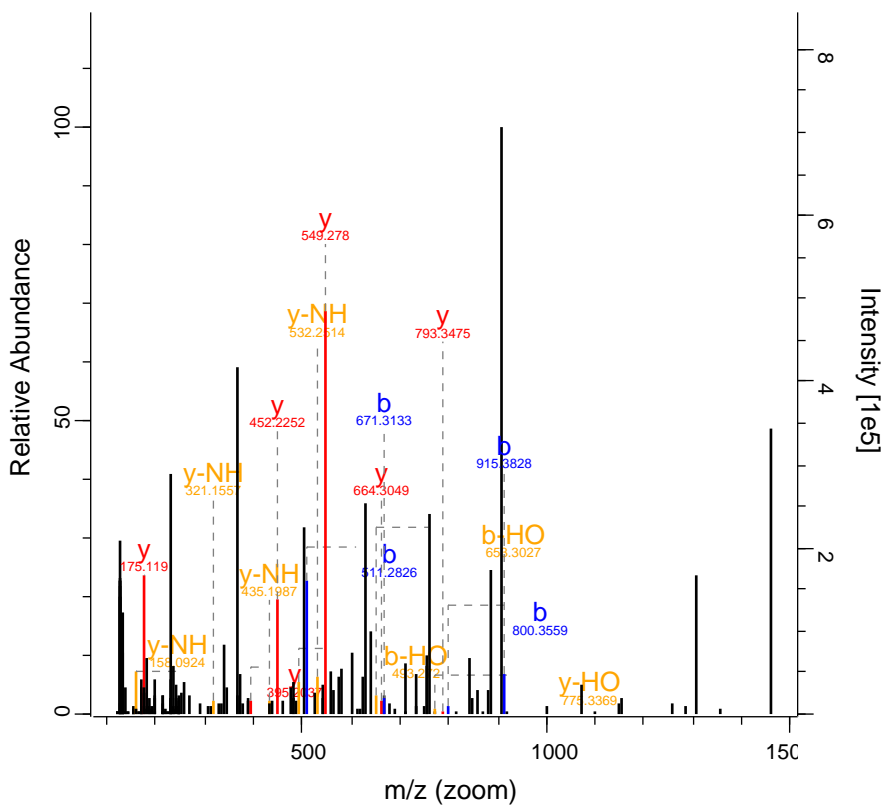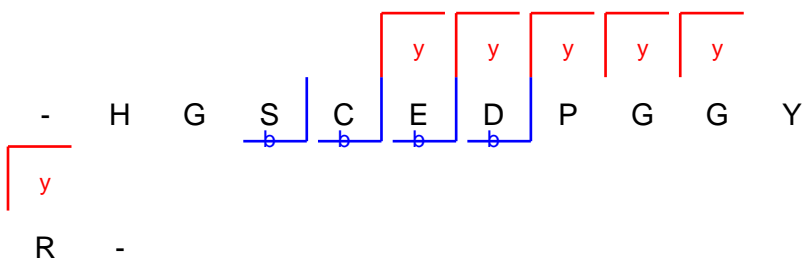

RO-QC-160121\_ZackD\_SS\_Set\_01\_Fraction 6119 FTMS; HCl 91.09 669.83 TMEM47

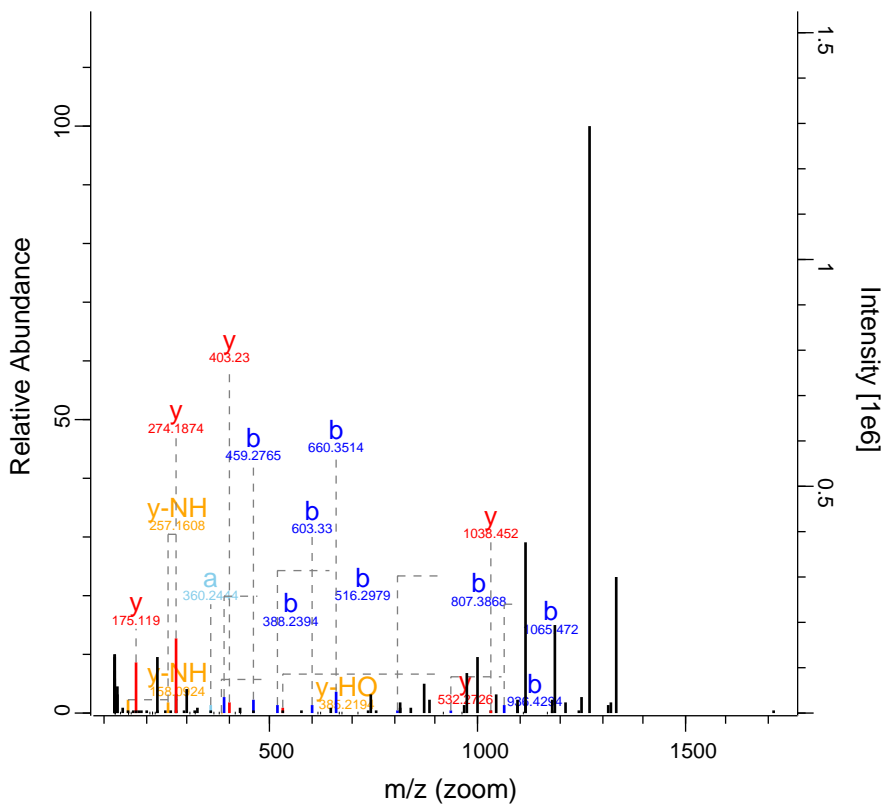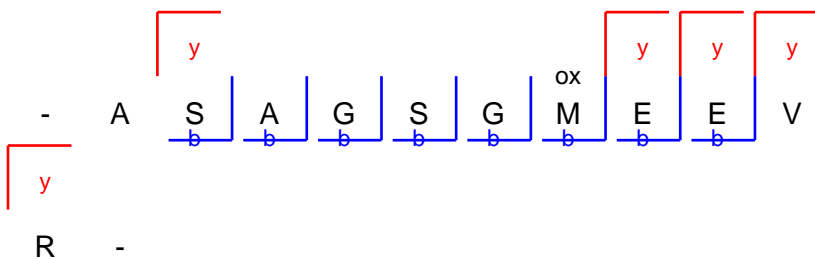

R

RO-QC-160121\_ZackD\_SS\_Set\_01\_Fraction 6262 FTMS; HCl 111.86 513.3 LRIF1

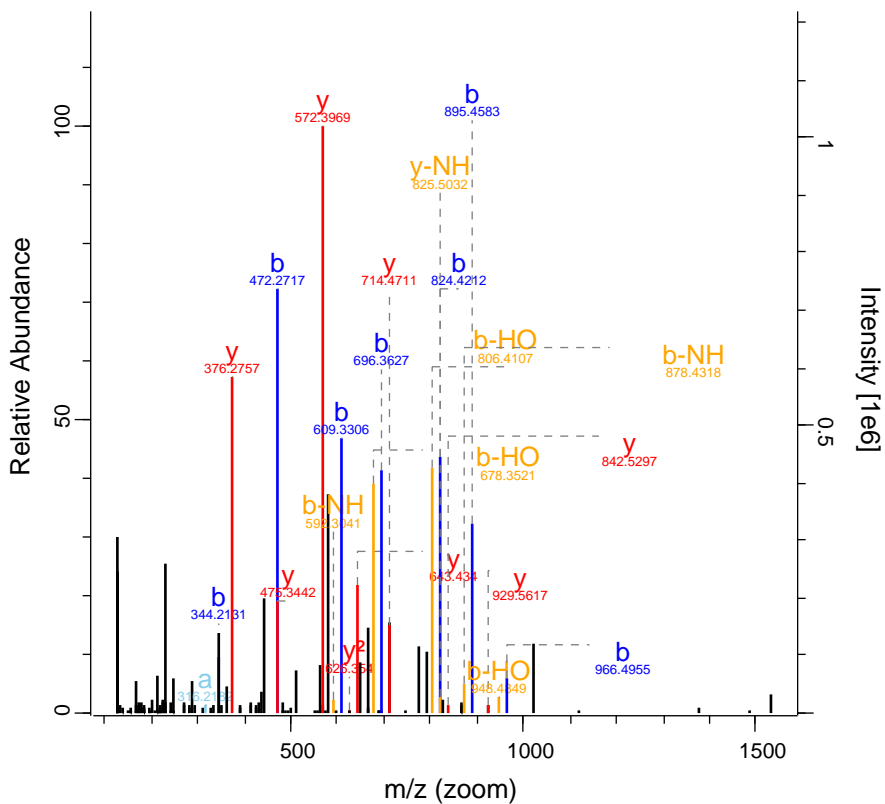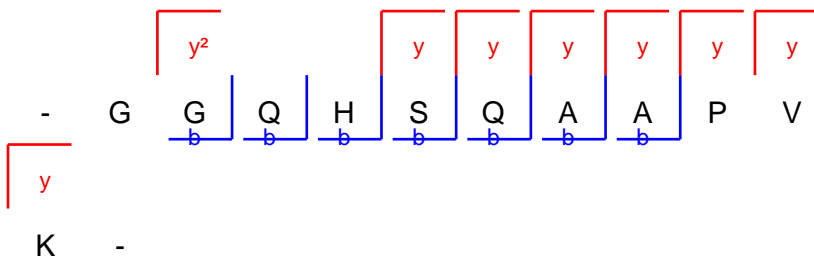

RO-QC-160121\_ZackD\_SS\_Set\_01\_Fraction 6314 FTMS; HC 152.85 519.04 ZNF518B

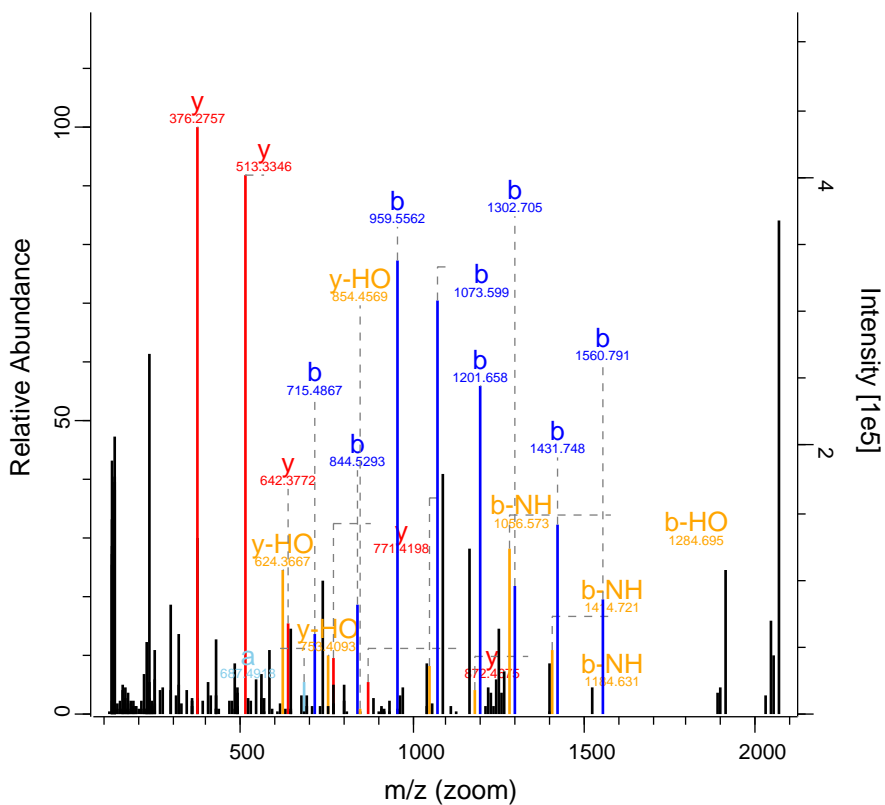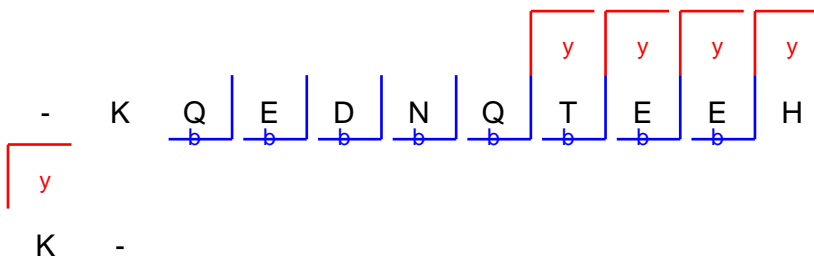

K



RO-QC-160121\_ZackD\_SS\_Set\_01\_Fraction 6740 FTMS; HCl 105.14 575.8 GPAM

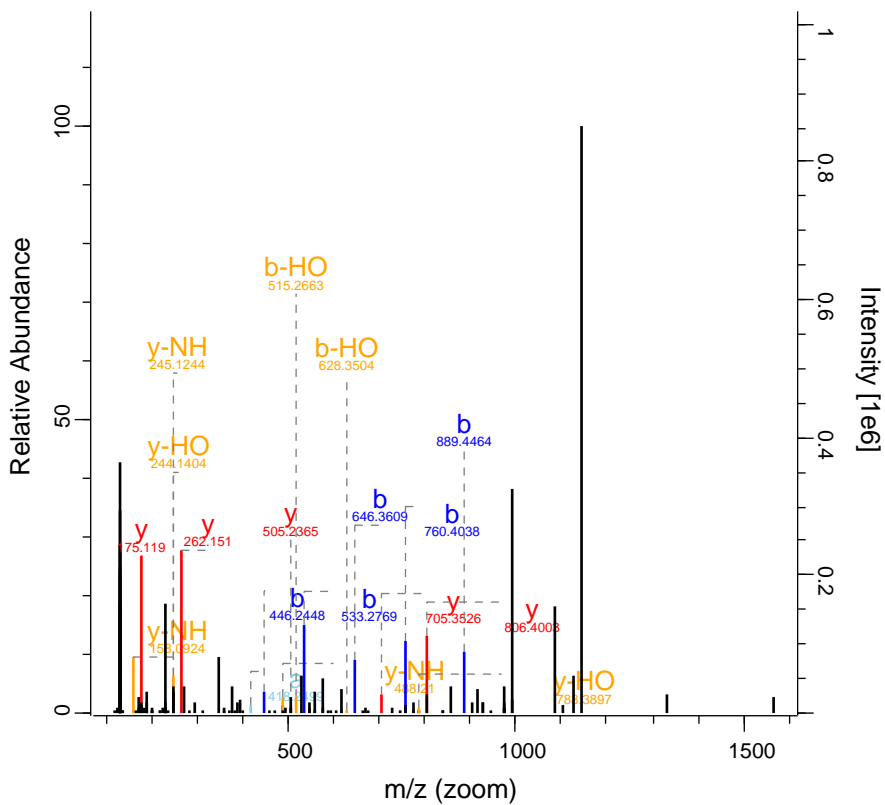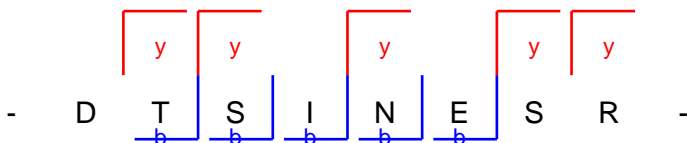

RO-QC-160121\_ZackD\_SS\_Set\_01\_Fraction 7602 FTMS; HC 196.44 778.93 TTC39B

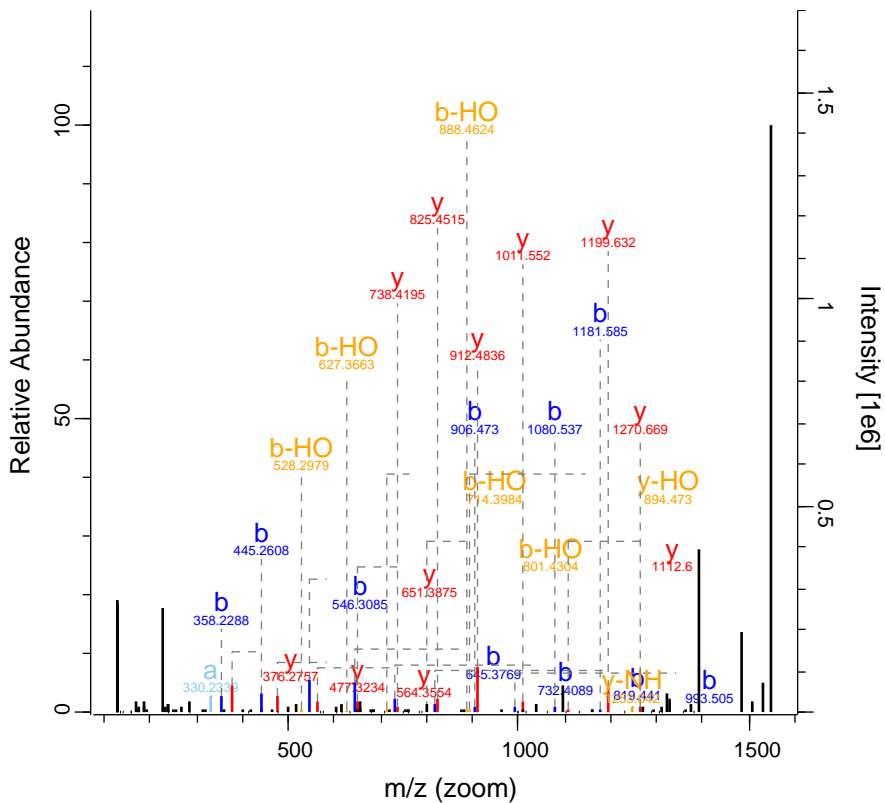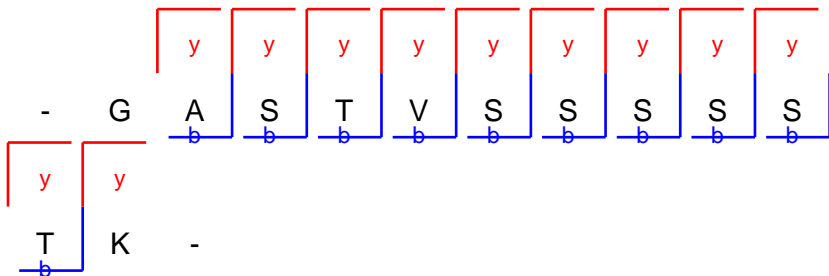

RO-QC-160121\_ZackD\_SS\_Set\_01\_Fraction 7976 FTMS; HCl 80.24 709.86 SLCO3A1

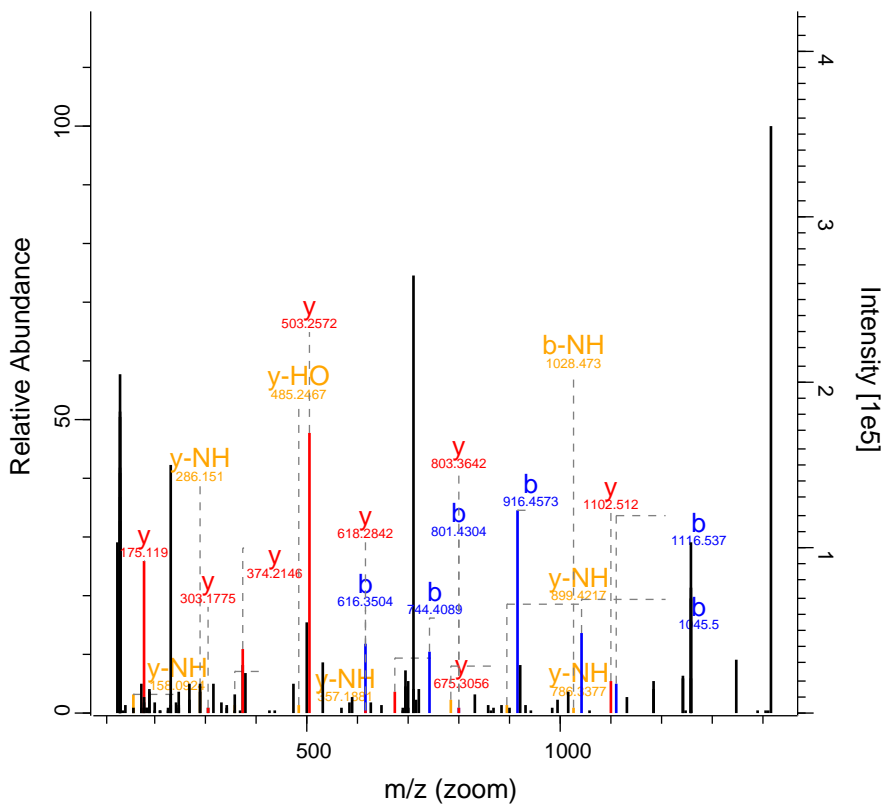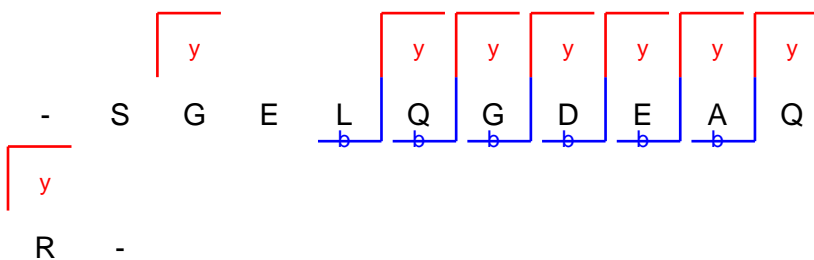

RO-QC-160121\_ZackD\_SS\_Set\_01\_Fraction 8020 FTMS; HCl 60.68 467.94 SLCO4A1

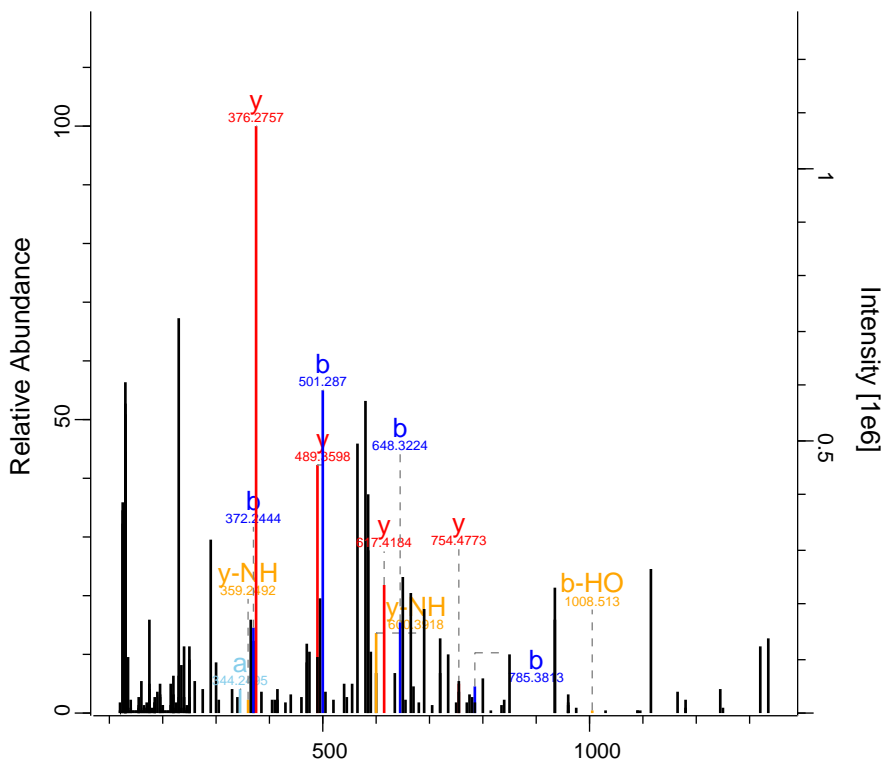

m/z (zoom)

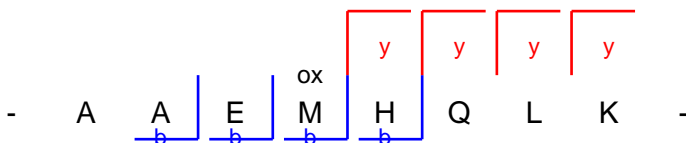

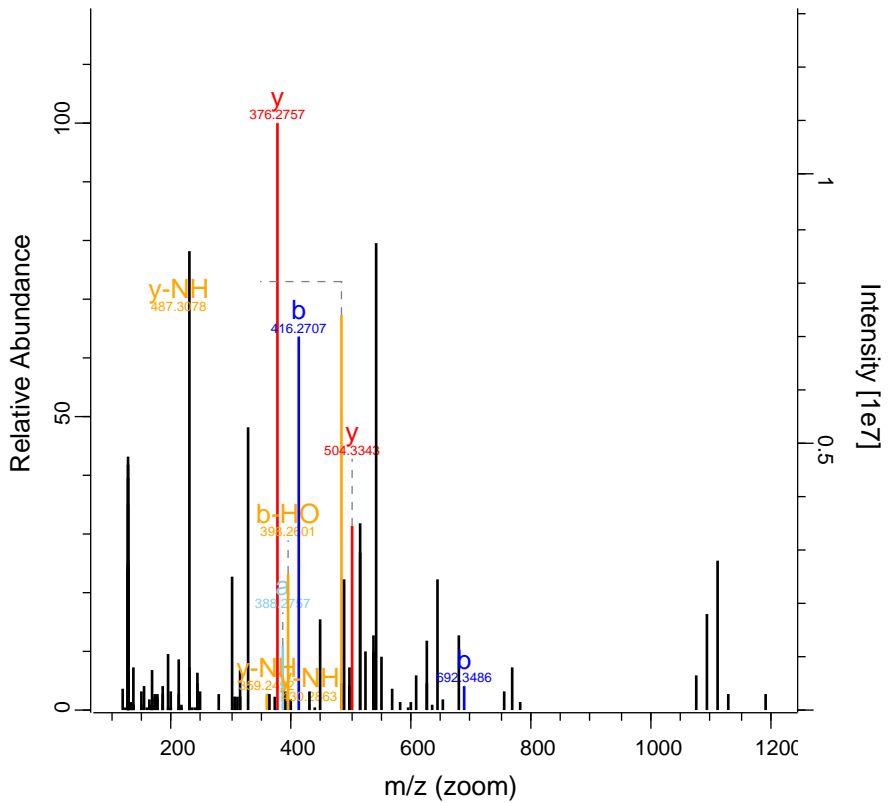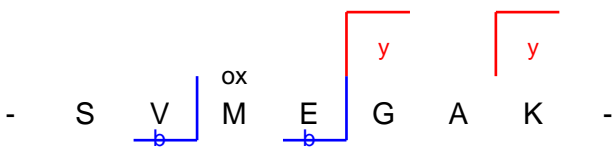

RO-QC-160121\_ZackD\_SS\_Set\_01\_Fraction 8274 FTMS; HC 121.99 717.05 PCGF5

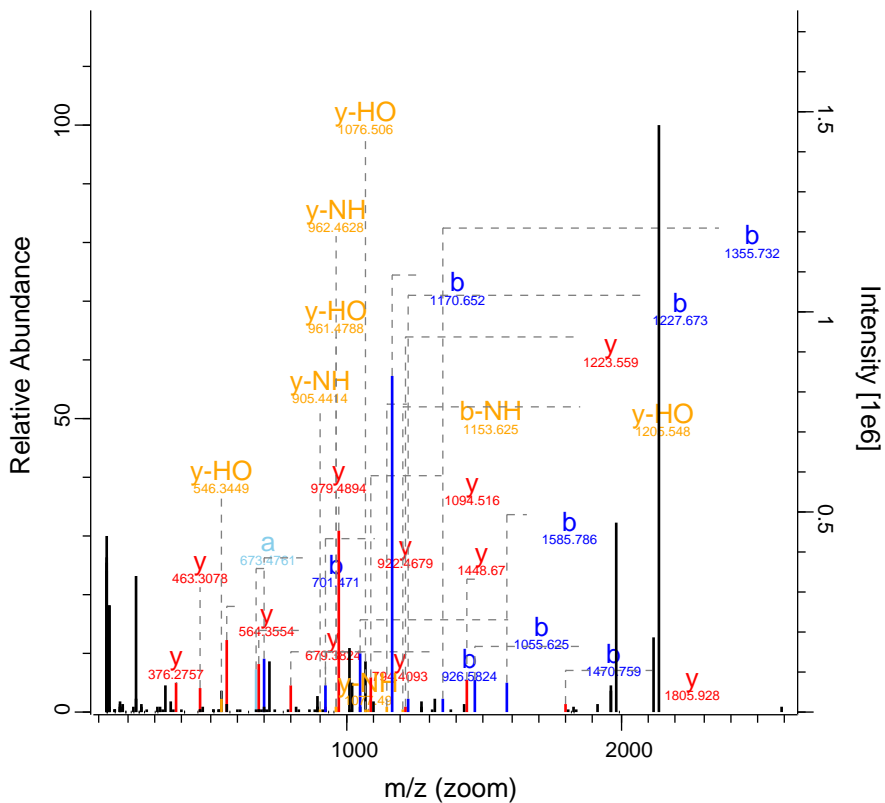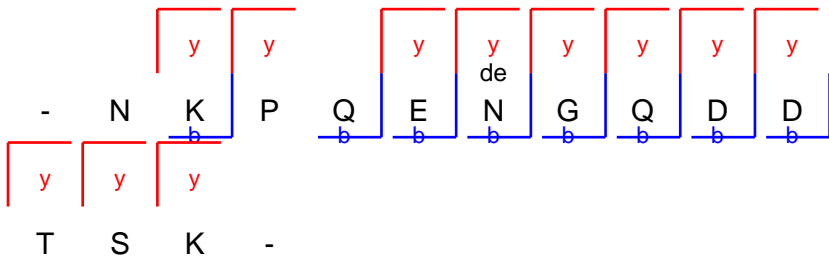

RO-QC-160121\_ZackD\_SS\_Set\_01\_Fraction 8295 FTMS; HCl 53.97 456.94 TCTN2

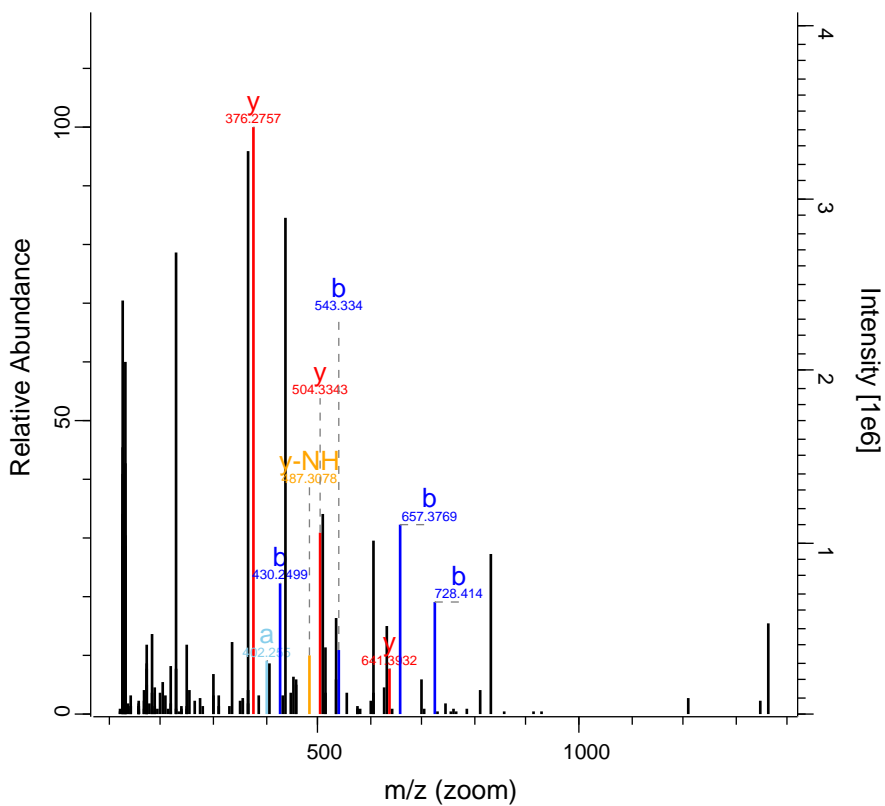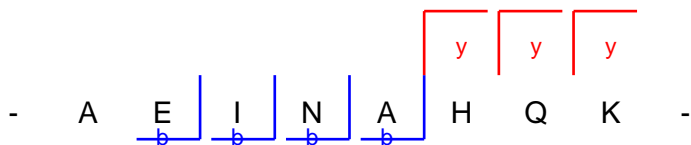

RO-QC-160121\_ZackD\_SS\_Set\_01\_Fraction 8404 FTMS; HCl|91.58 440.01 EMP2

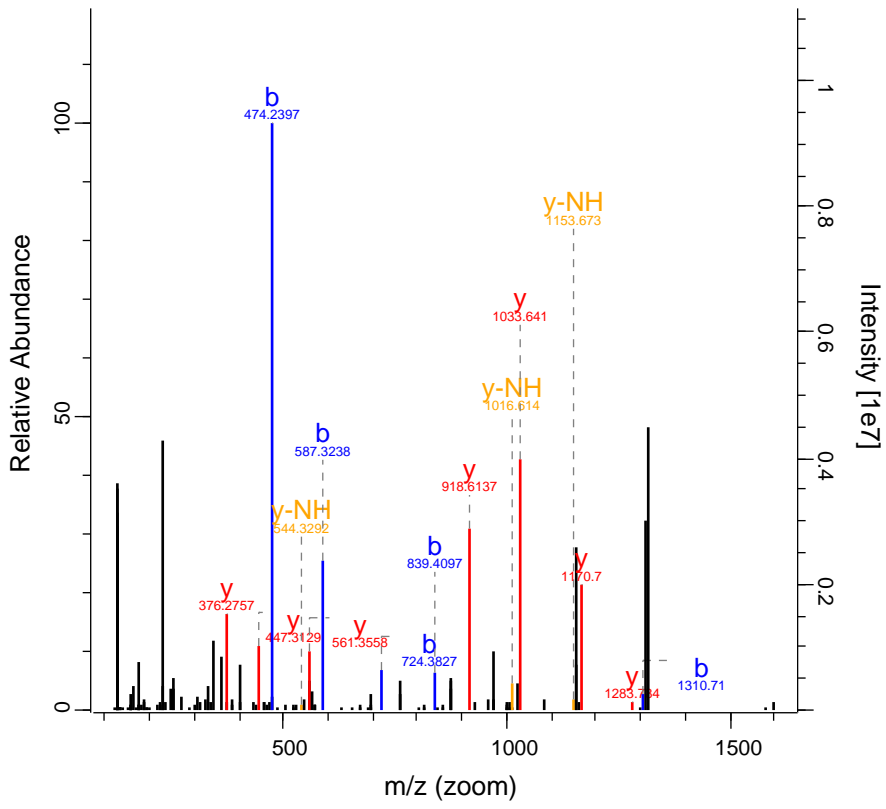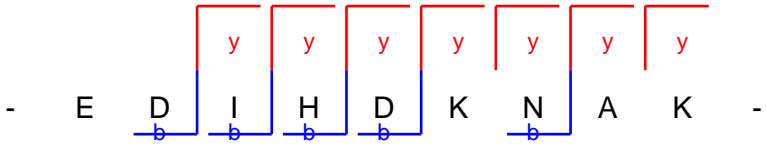



RO-QC-160121\_ZackD\_SS\_Set\_01\_Fraction 8432 FTMS; HCl 73.3 730.08 CDC20

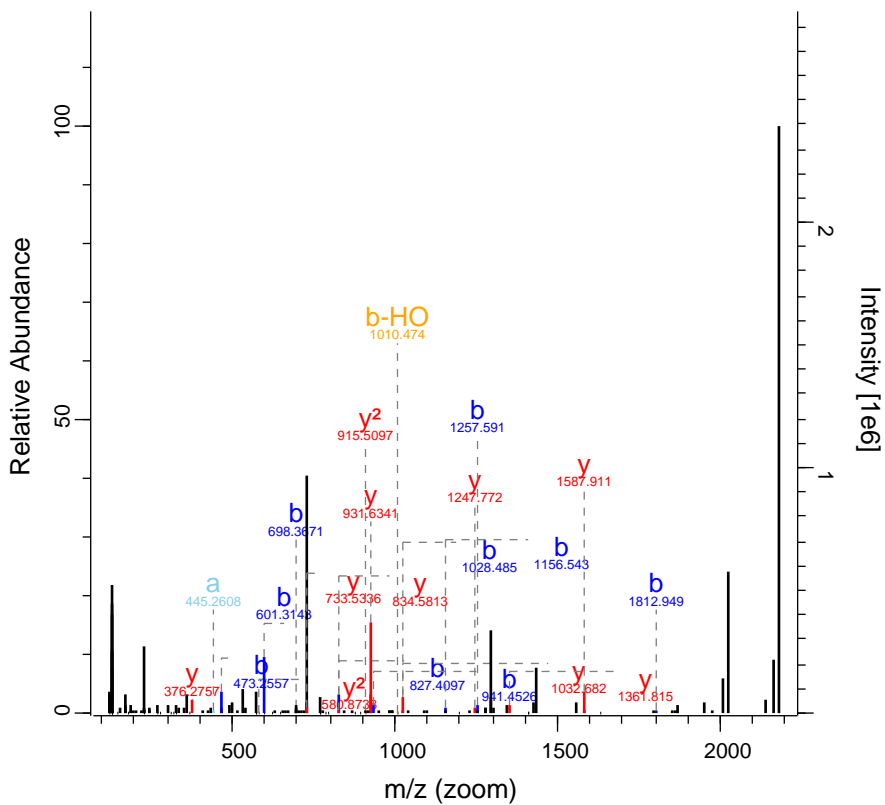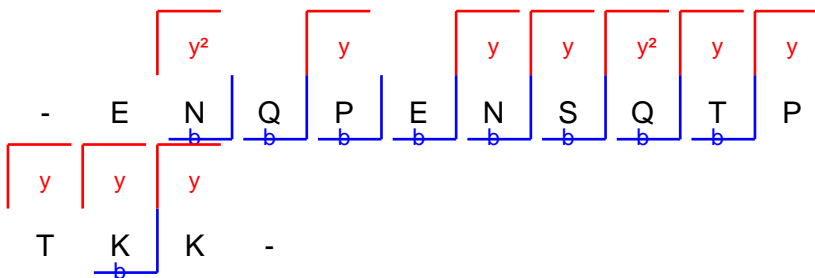

RO-QC-160121\_ZackD\_SS\_Set\_01\_Fraction 8666 FTMS; HCl 116.12 786.9 SLC46A1

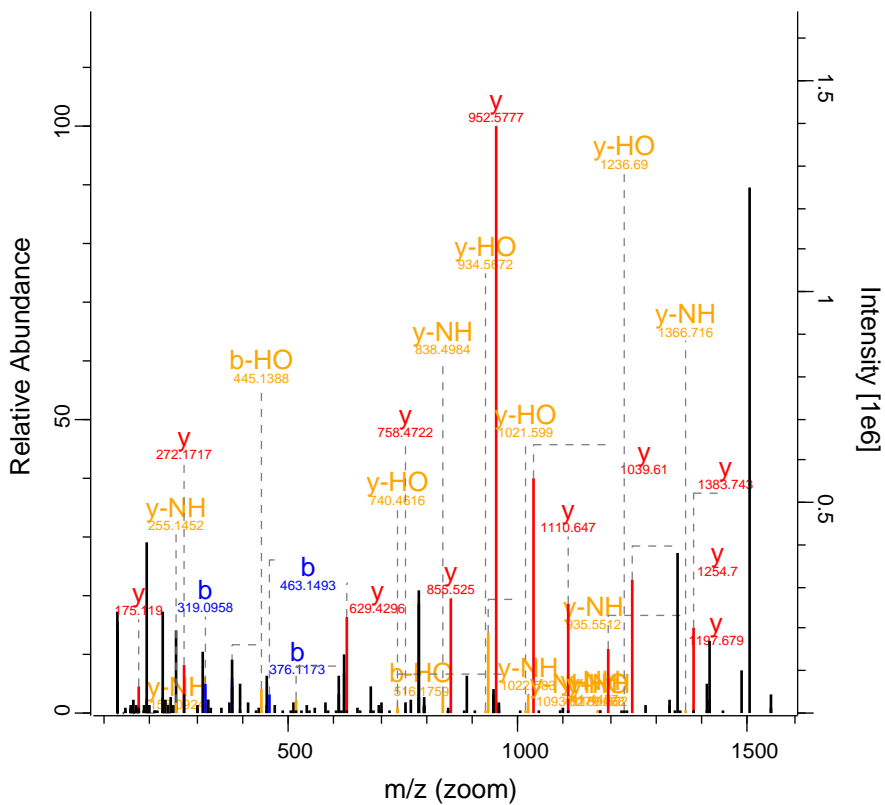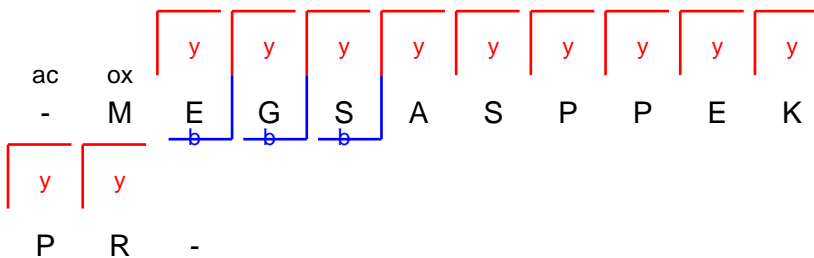

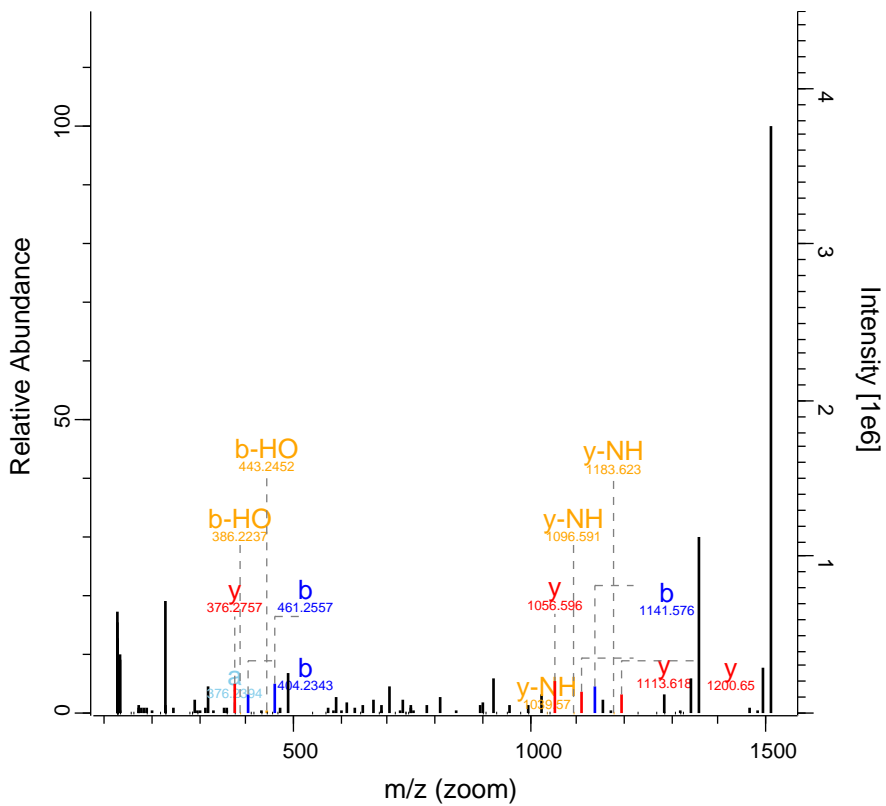

m/z (zoom)

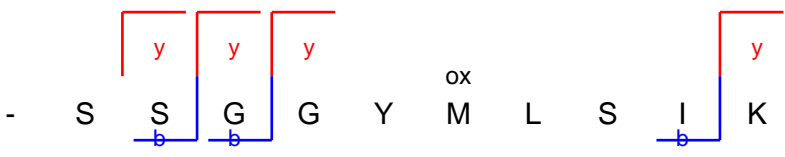

-



RO-QC-160121\_ZackD\_SS\_Set\_01\_Fraction 8868 FTMS; HCl 121.73 786.9 SLC46A1

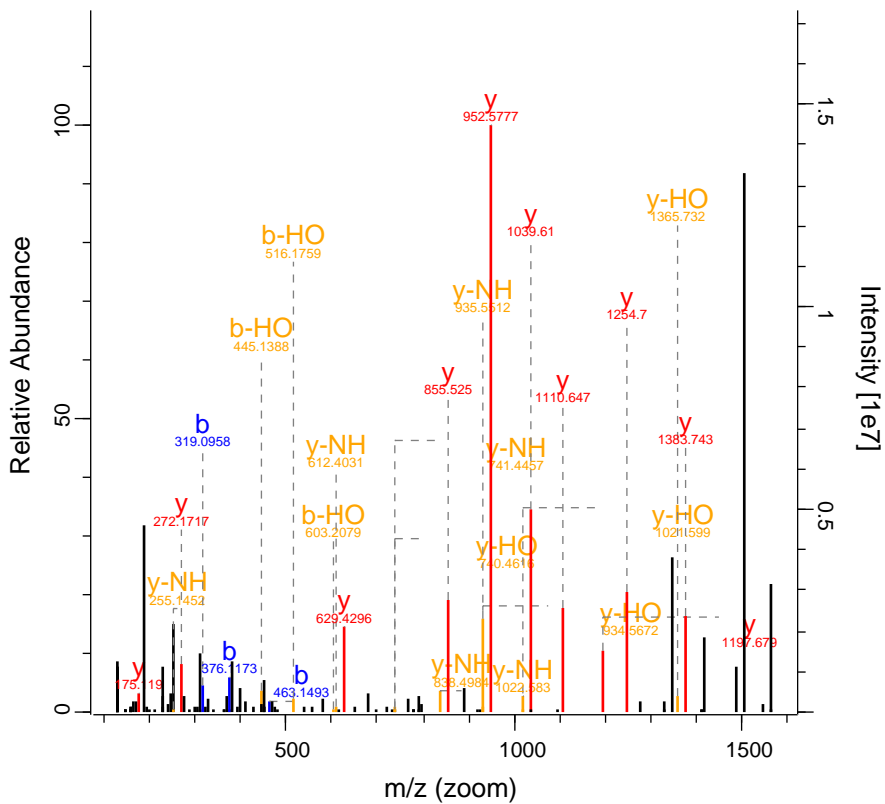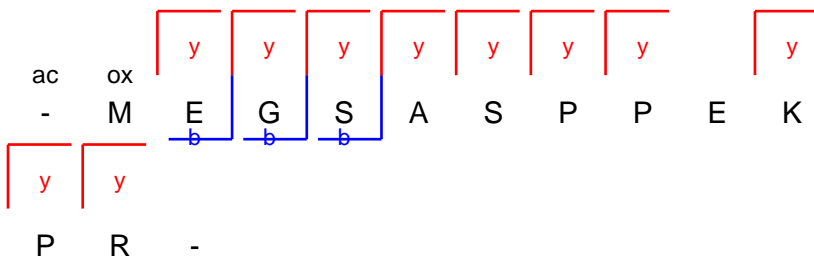

RO-QC-160121\_ZackD\_SS\_Set\_01\_Fraction19768 FTMS; HC 109.92 605.95 CHCHD5

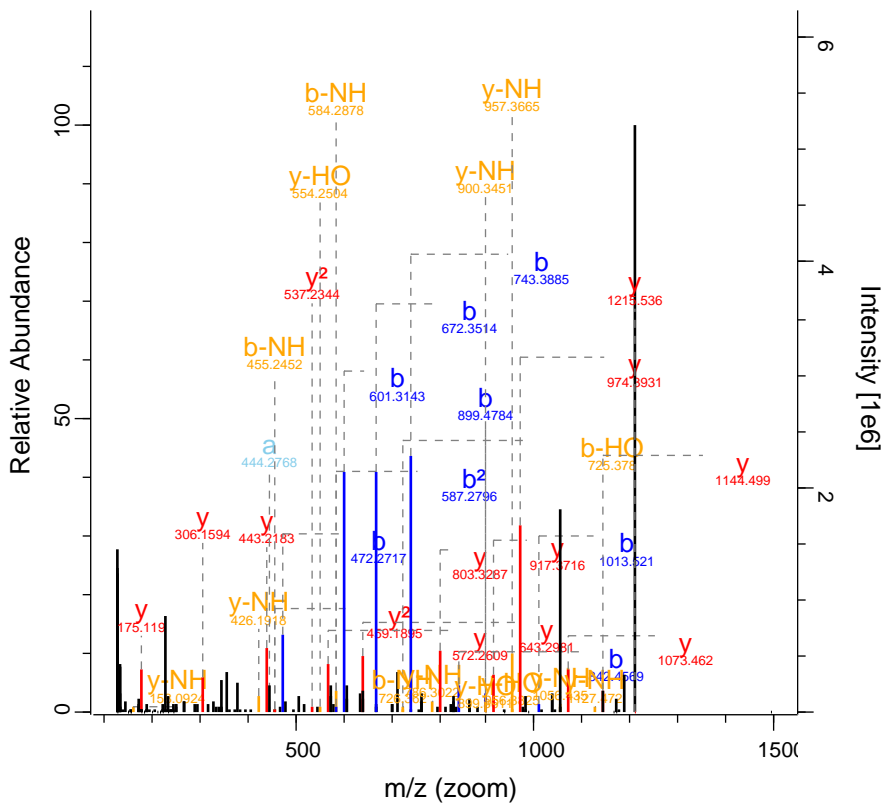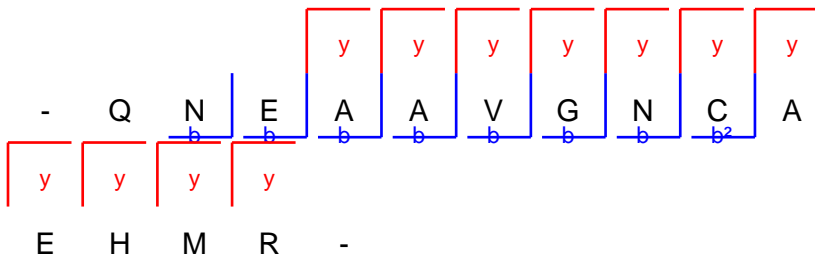

RO-QC-160121\_ZackD\_SS\_Set\_01\_Fraction 9840 FTMS; HC 127.76 378.21 GGT7

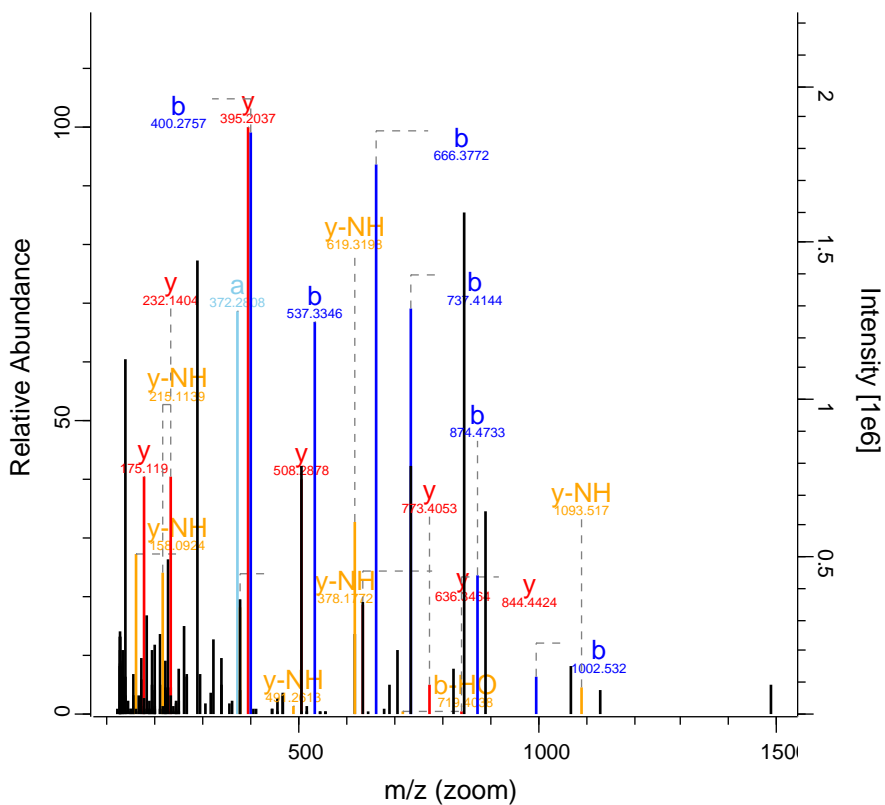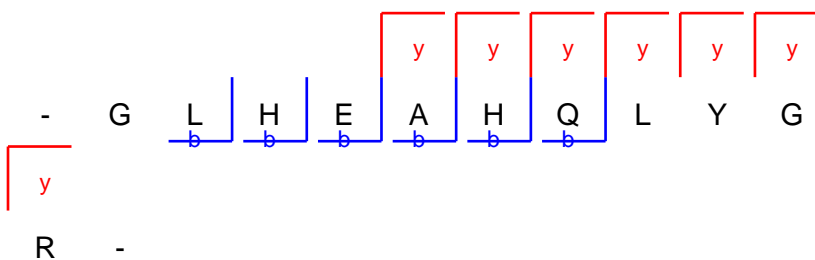

RO-QC-160121\_ZackD\_SS\_Set\_01\_Fraction 9945 FTMS; HC 120.46 577.29 ST6GALNAC3

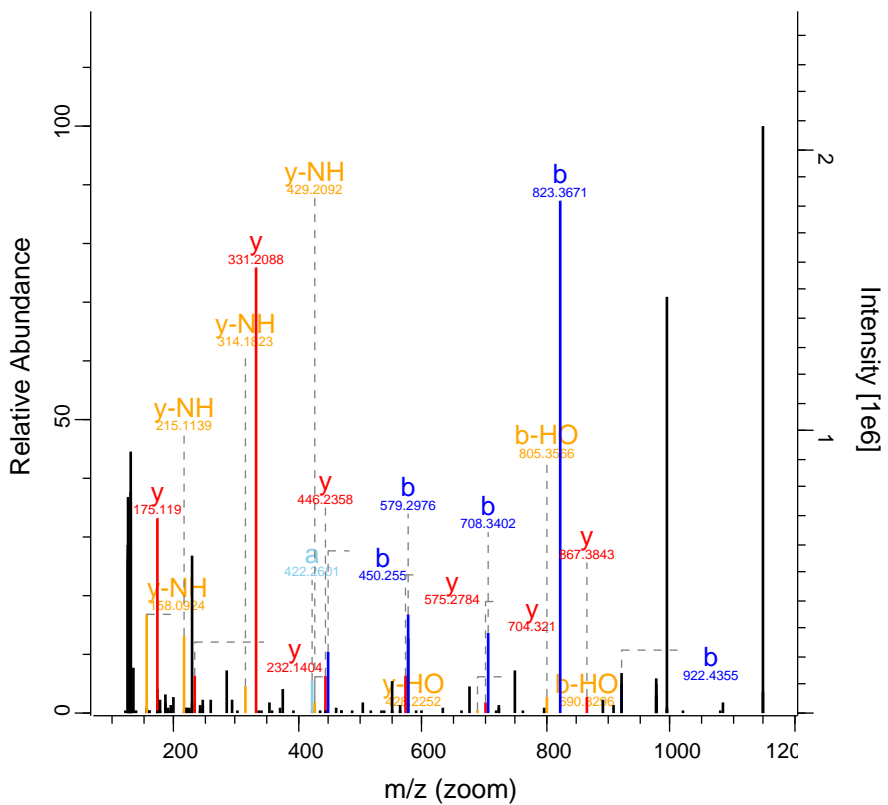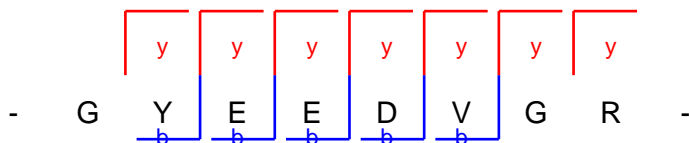



RO-QC-160121\_ZackD\_SS\_Set\_01\_Fractio 10460 FTMS; HC 108.67 620.95 PLA2G2A

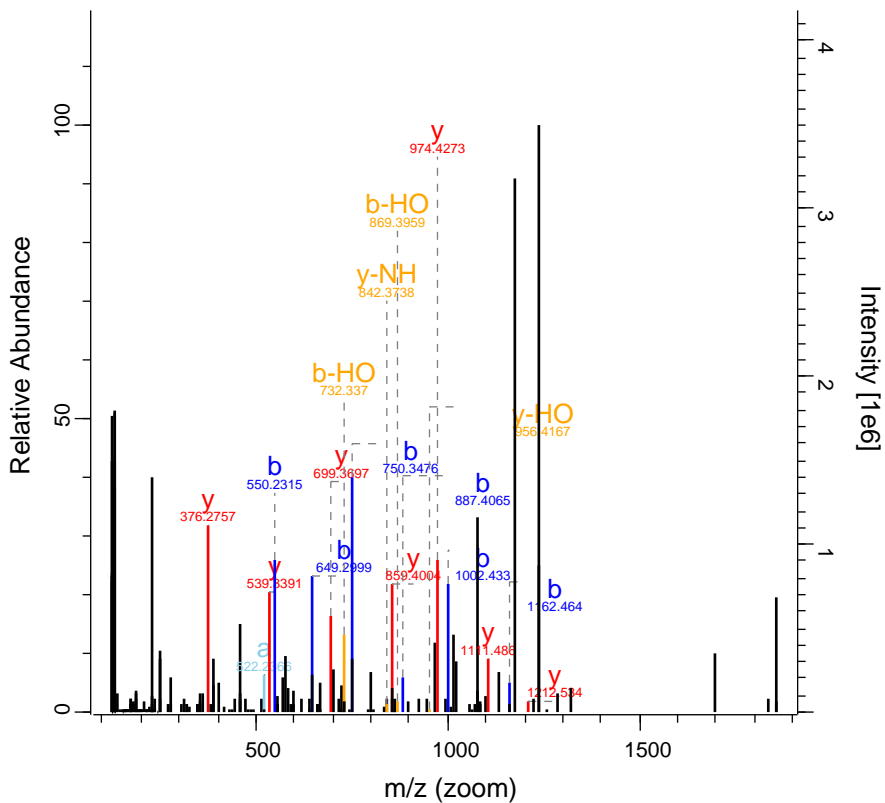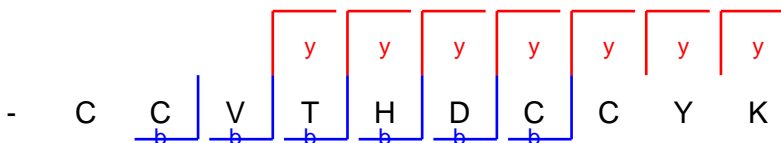

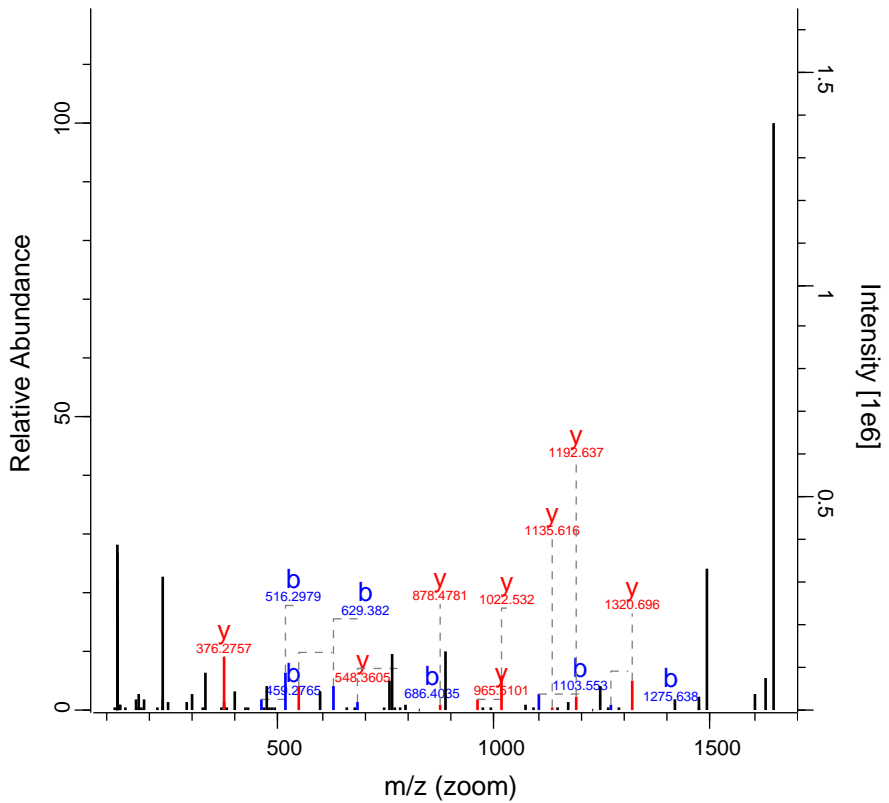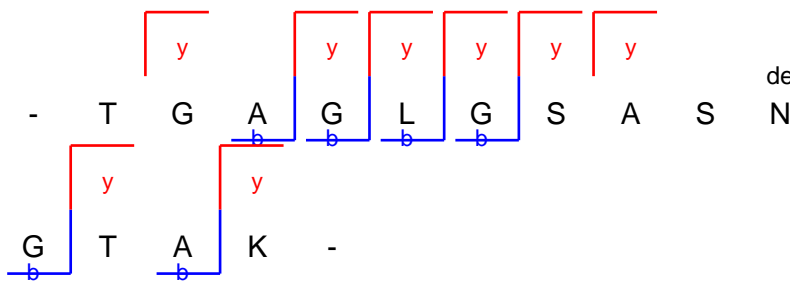

RO-QC-160121\_ZackD\_SS\_Set\_01\_Fraction1 11063 FTMS; HCl 120.12 666.9 FAM151B

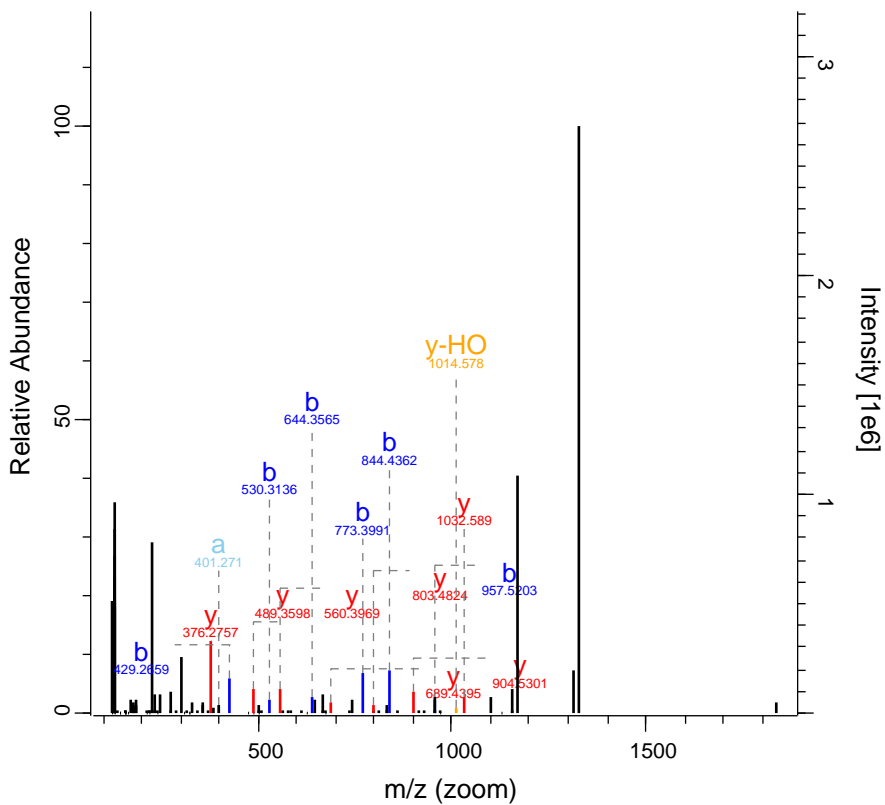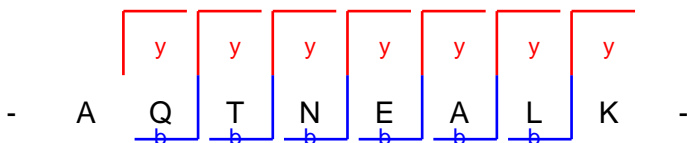

RO-QC-160121\_ZackD\_SS\_Set\_01\_Fraction 11314 FTMS; HC 50.28 906.92 CC2D2B

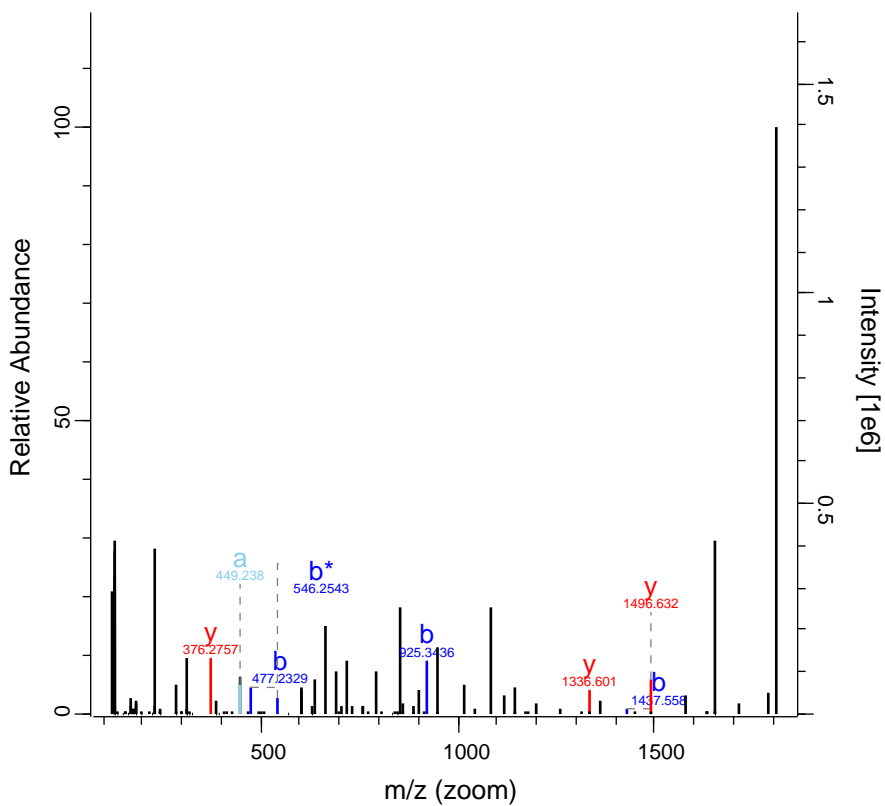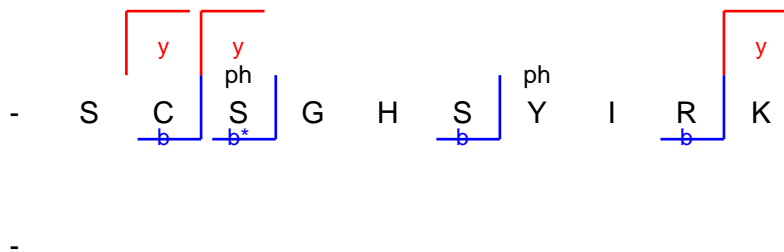

RO-QC-160121\_ZackD\_SS\_Set\_01\_Fraction 11393 FTMS; HC 47.26 996.96 ANO3

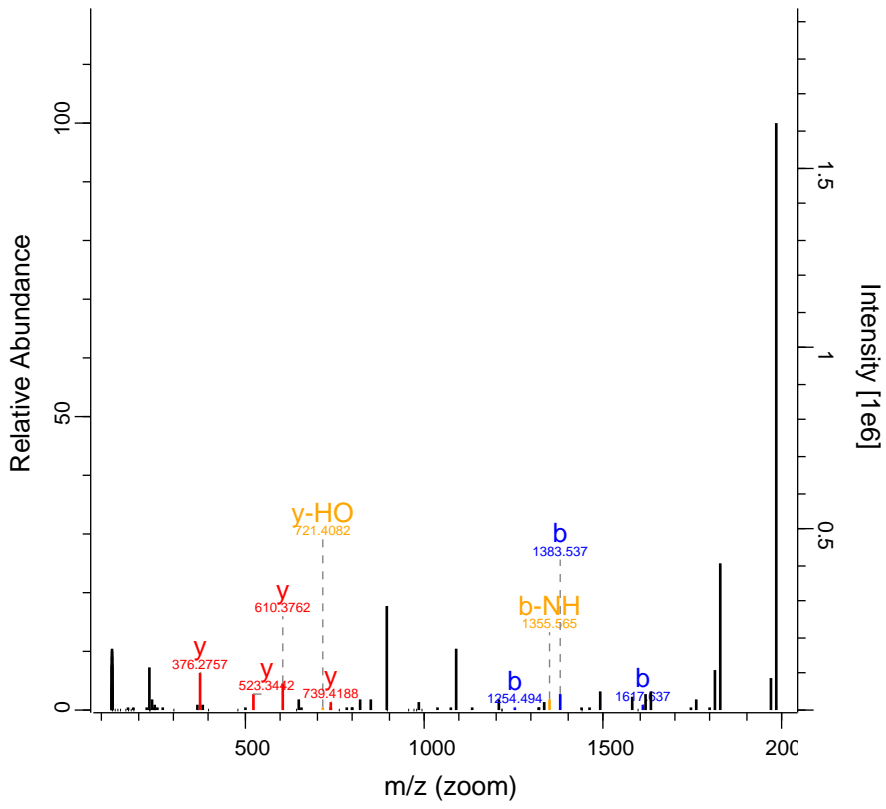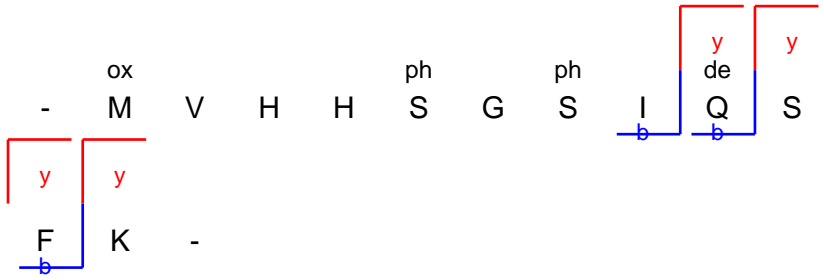

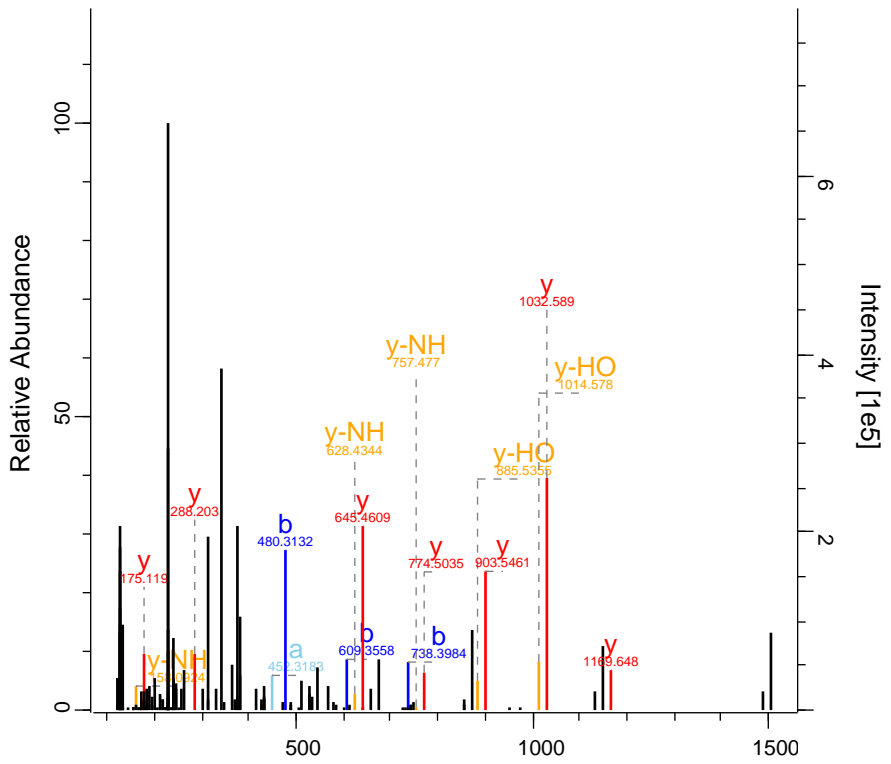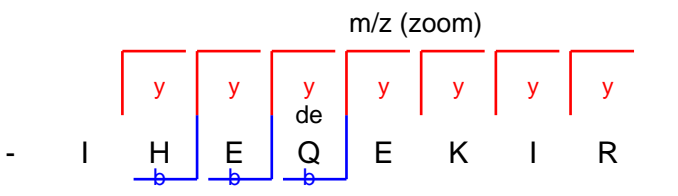

RO-QC-160121\_ZackD\_SS\_Set\_01\_Fractio 12269 FTMS; HC 175.73 734.92 AHR

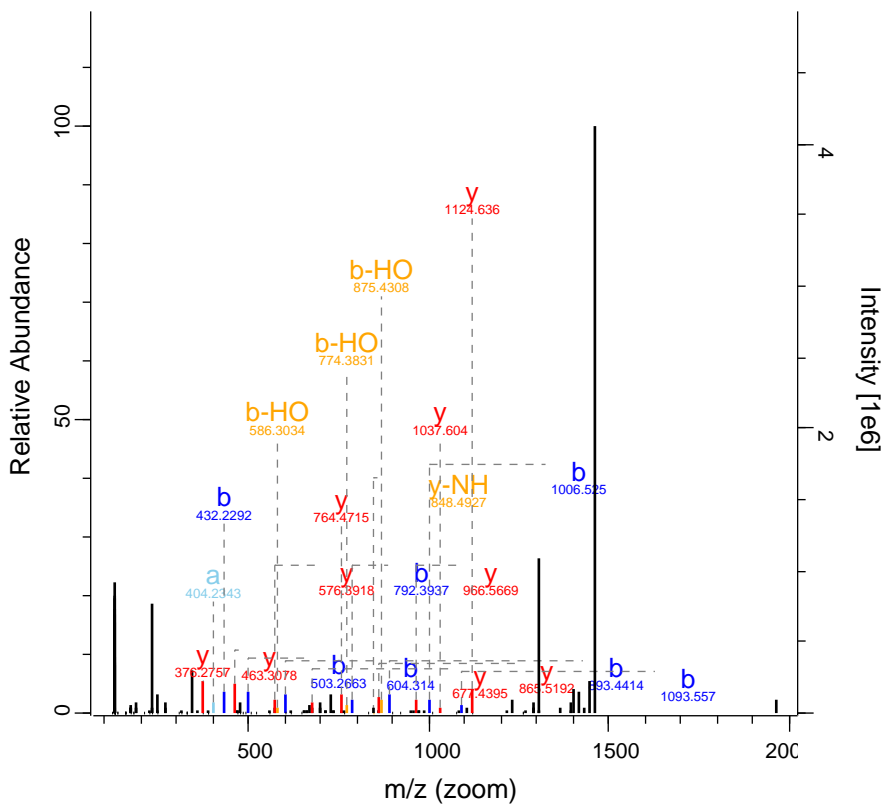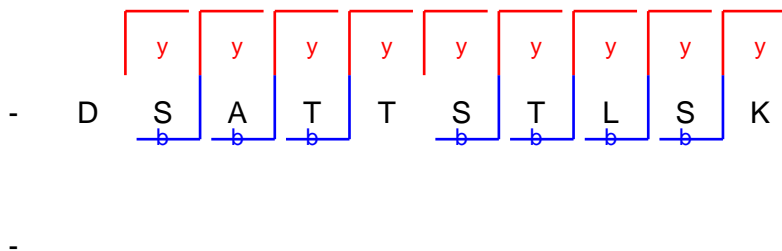

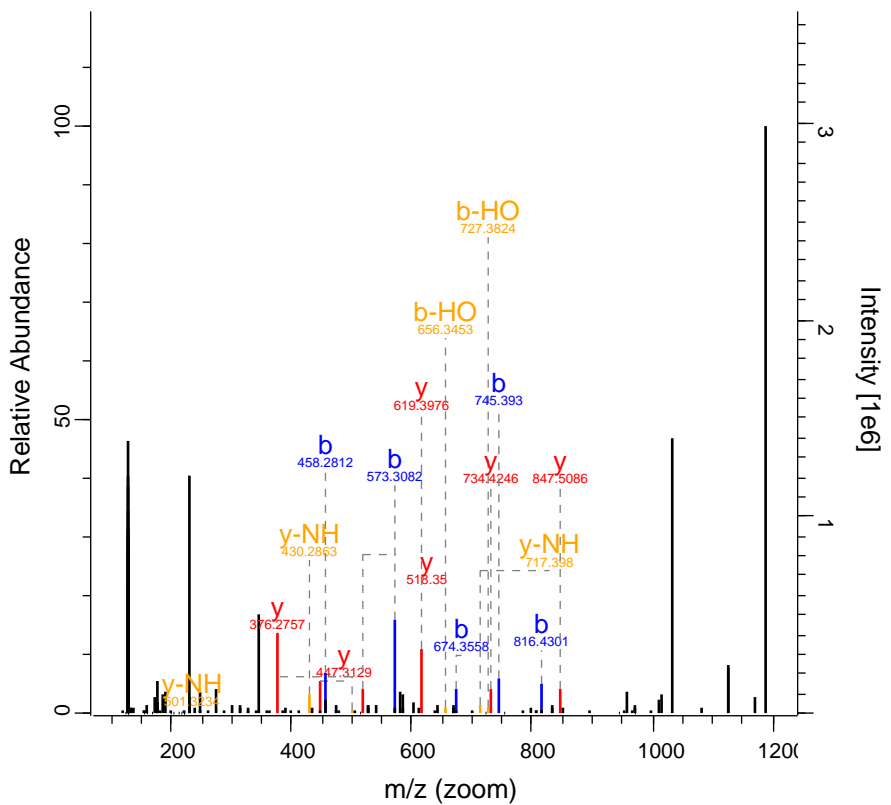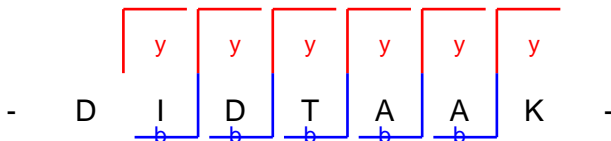



RO-QC-160121\_ZackD\_SS\_Set\_01\_Fratio12706 FTMS; HC 167.12 786.44 DGKZ

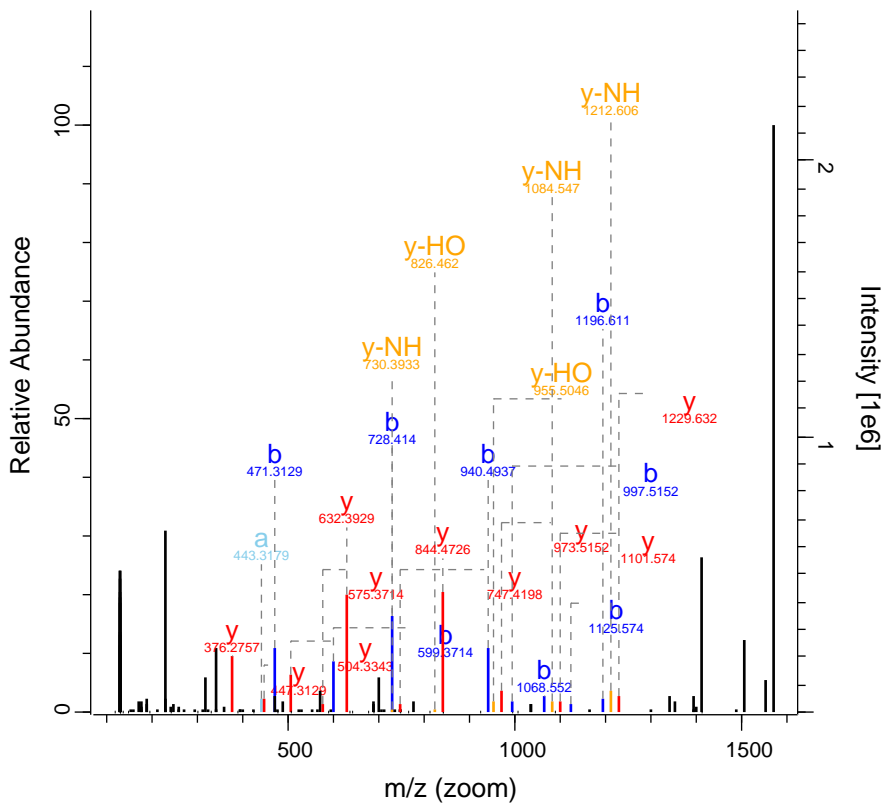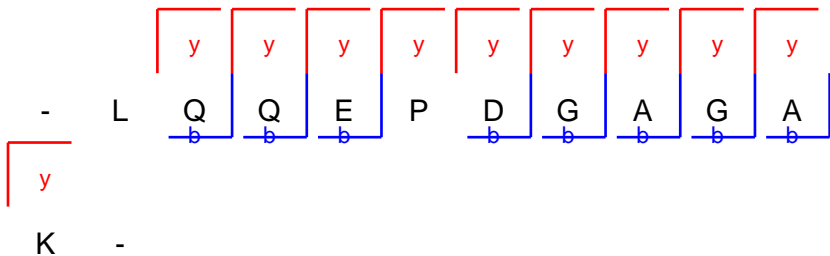

RO-QC-160121\_ZackD\_SS\_Set\_01\_Fraction\_1

12825 FTMS; HCD 98.63 687.9

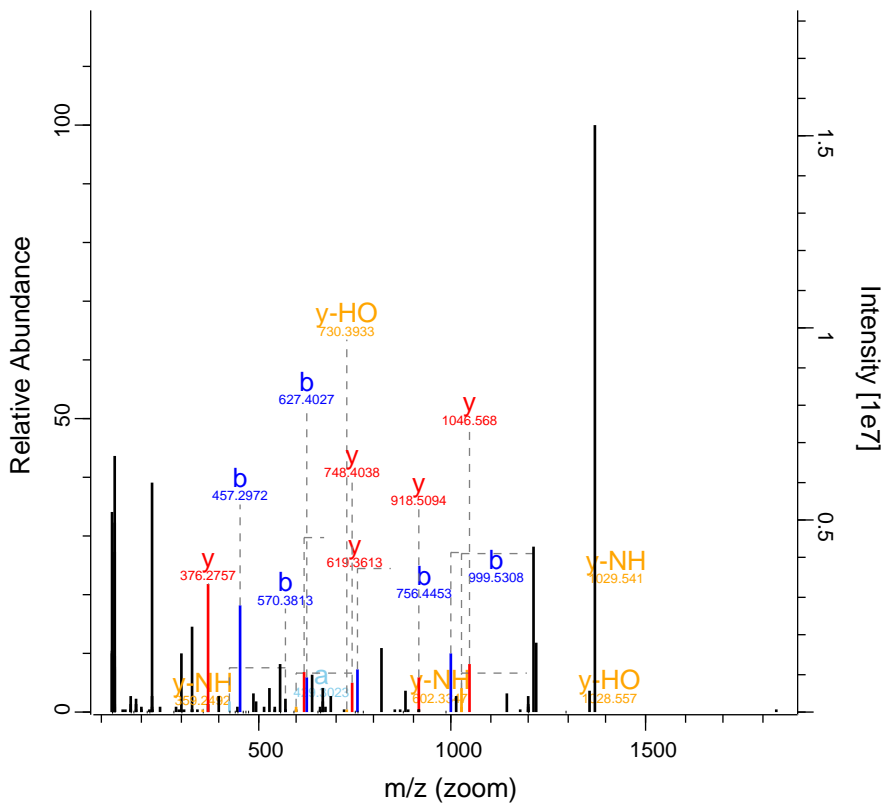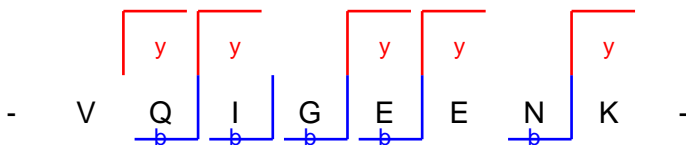

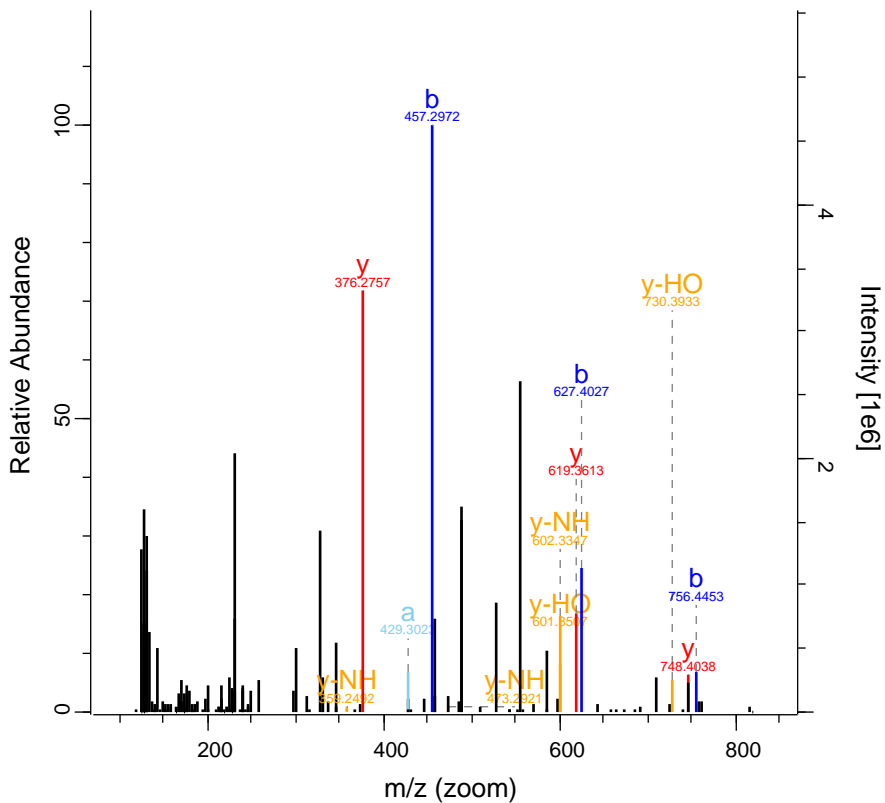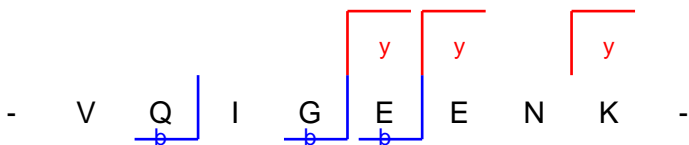

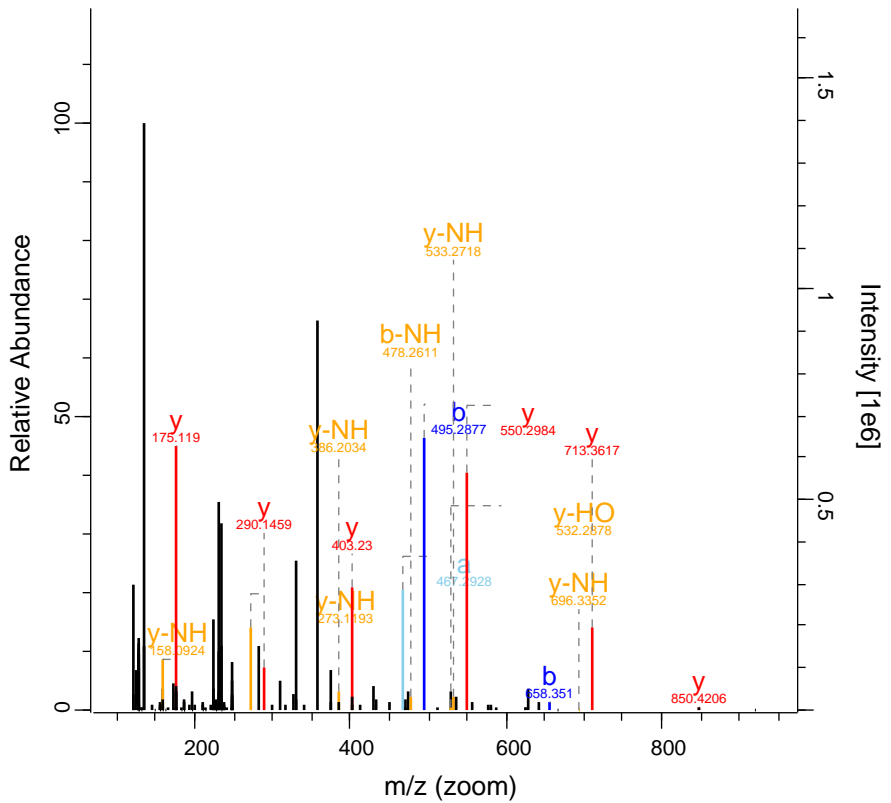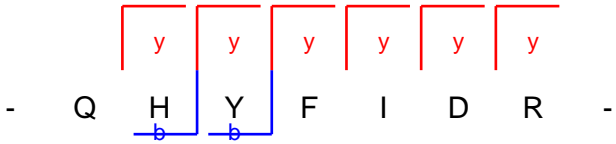

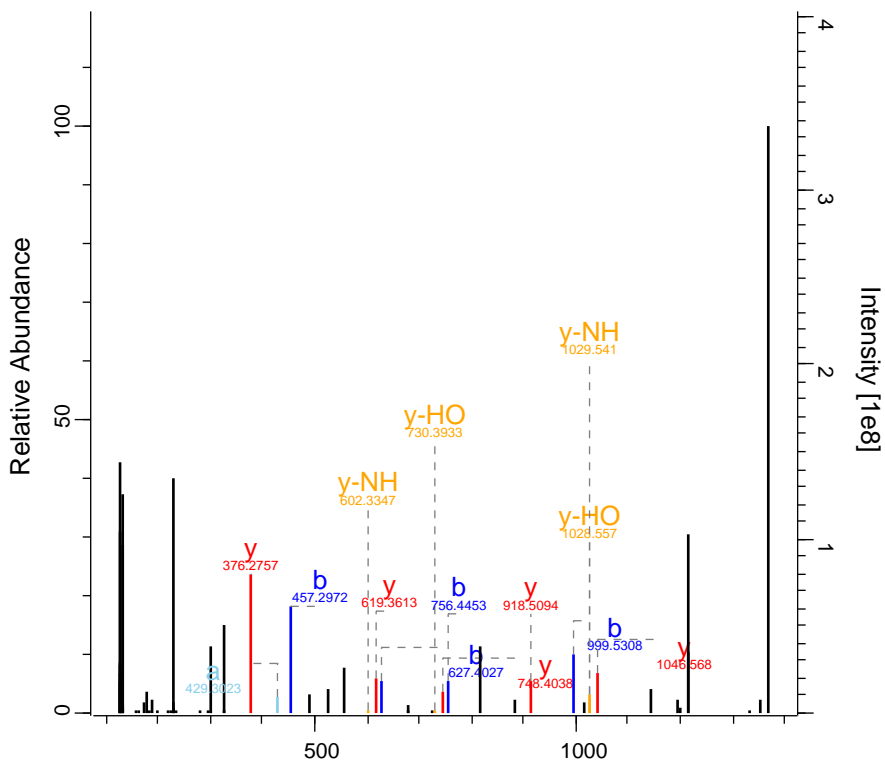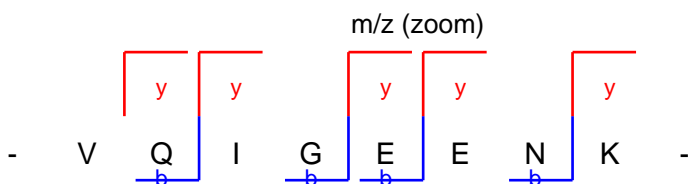

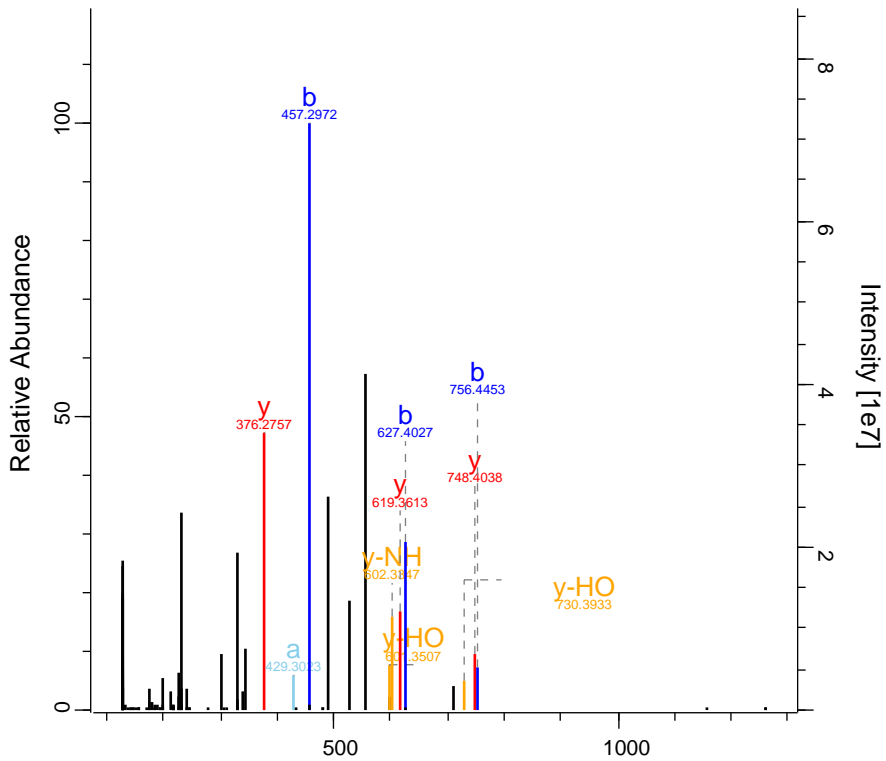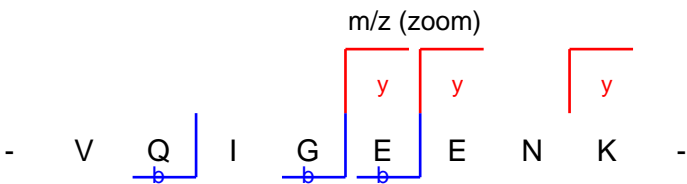

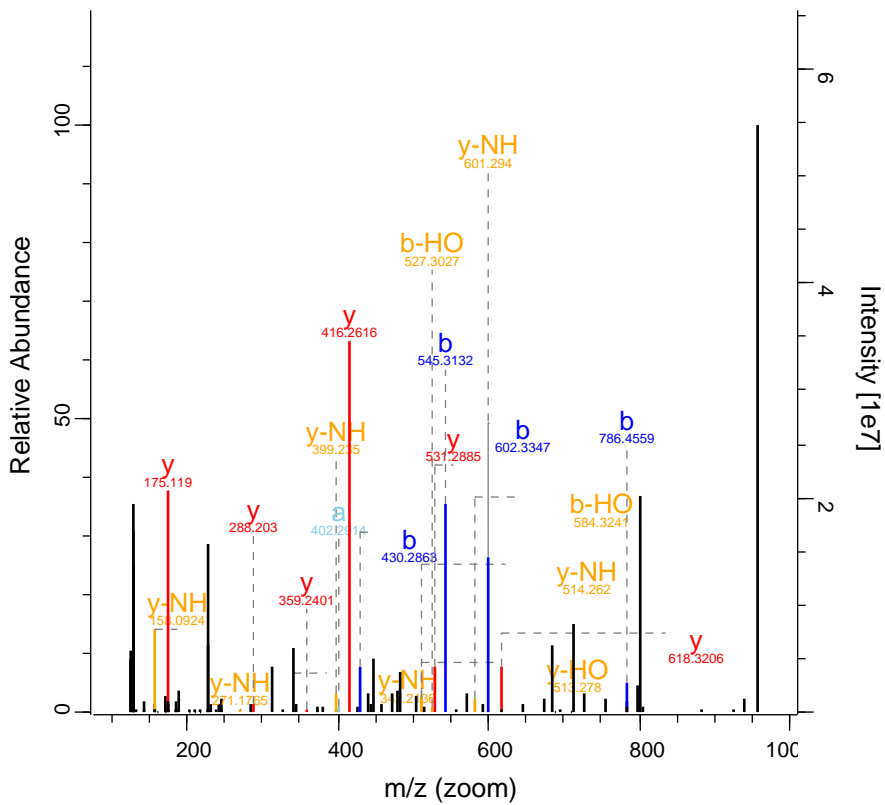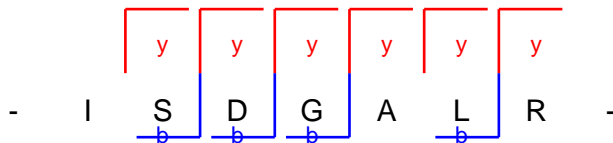

| Raw File                                | Scan  | Method    | Score | m/z    |
|-----------------------------------------|-------|-----------|-------|--------|
| RO-QC-160121_ZackD_SS_Set_01_Fraction_1 | 13701 | FTMS; HCD | 98.5  | 480.79 |

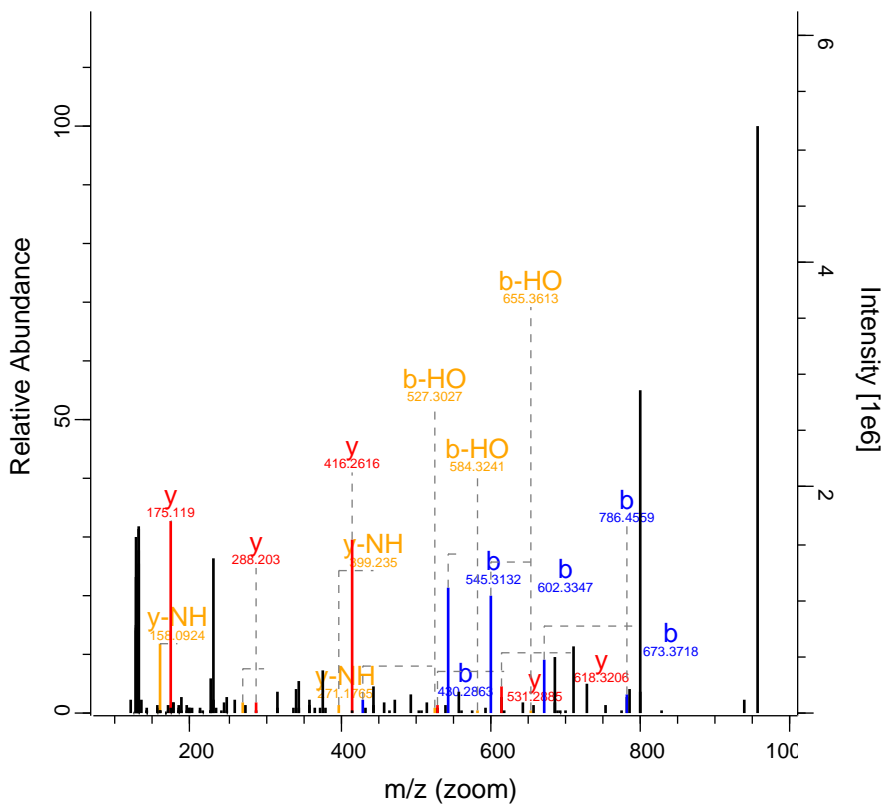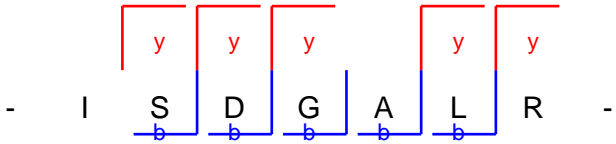



RO-QC-160121\_ZackD\_SS\_Set\_01\_Fraction14561 FTMS; HCl 107.21 799.4 KLHDC3

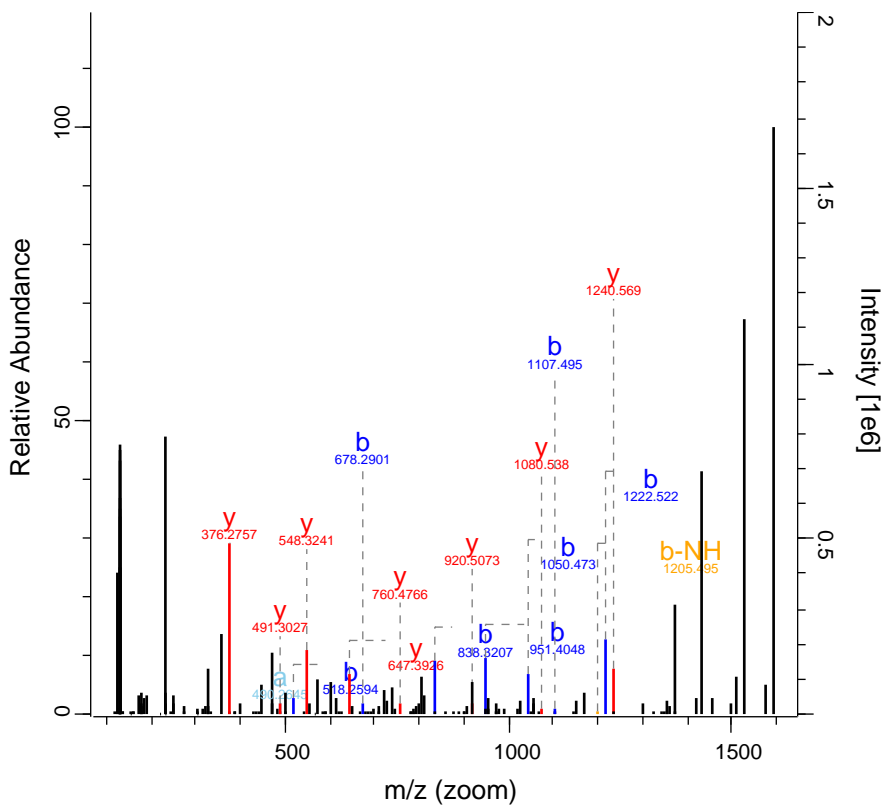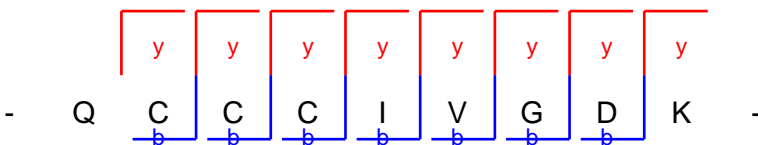

Raw File

Scan Method Score m/z

RO-QC-160121\_ZackD\_SS\_Set\_01\_Fraction\_1

14795 FTMS; HCD 78.15 552.83

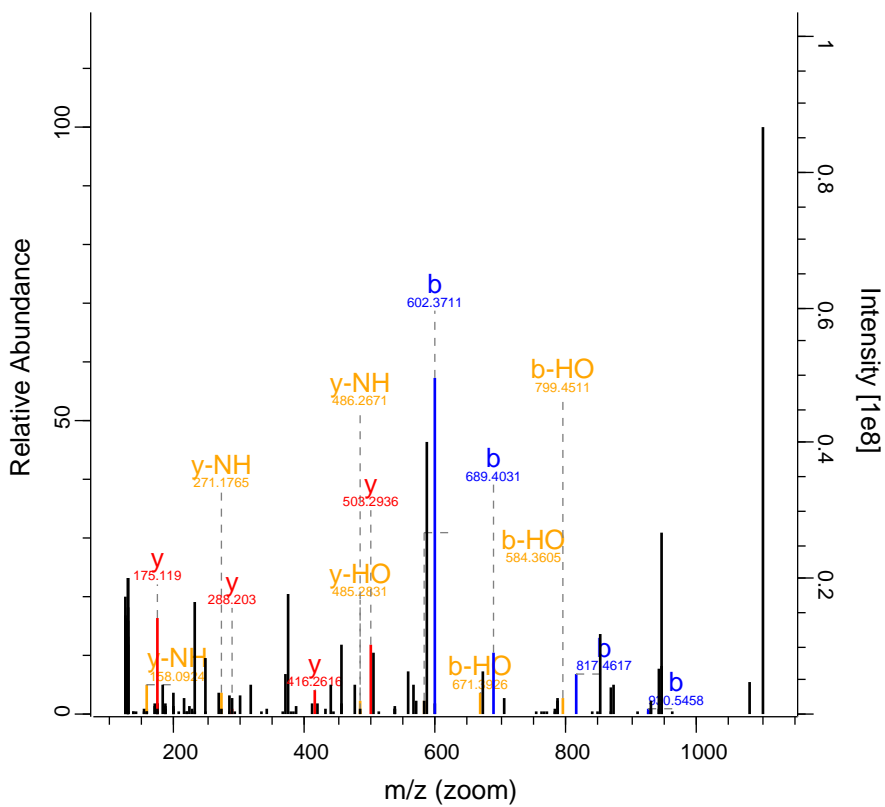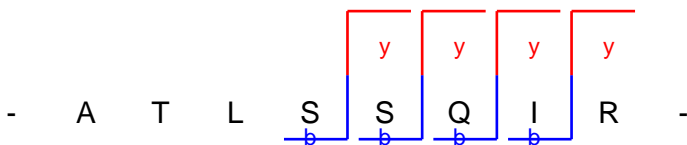

RO-QC-160121\_ZackD\_SS\_Set\_01\_Fractic 14894 FTMS; HC 138.25 1018.58 SP2

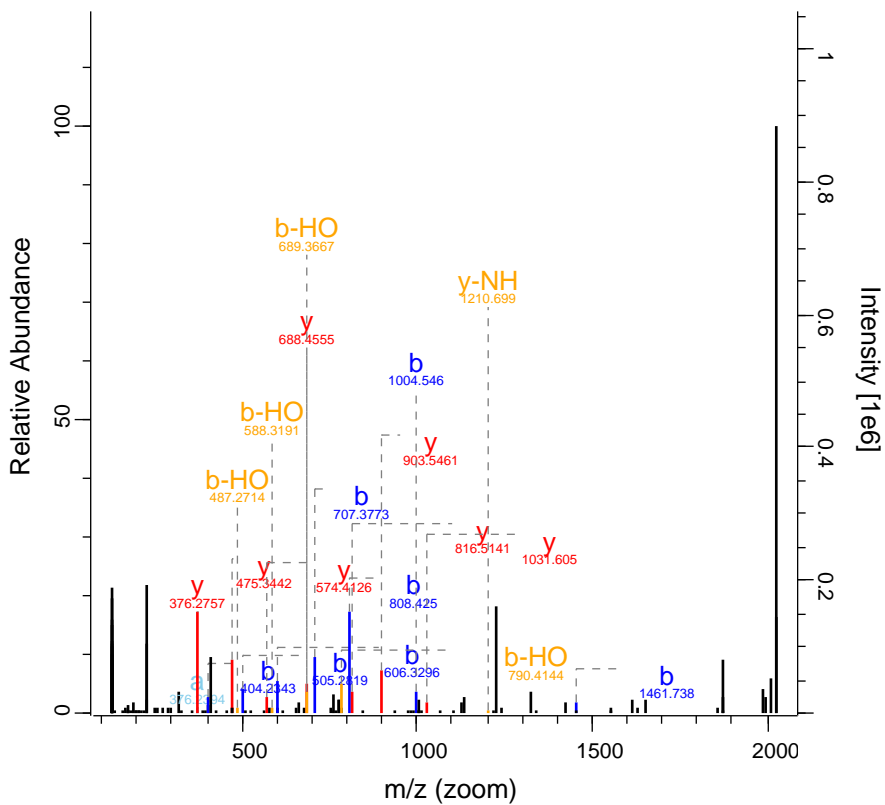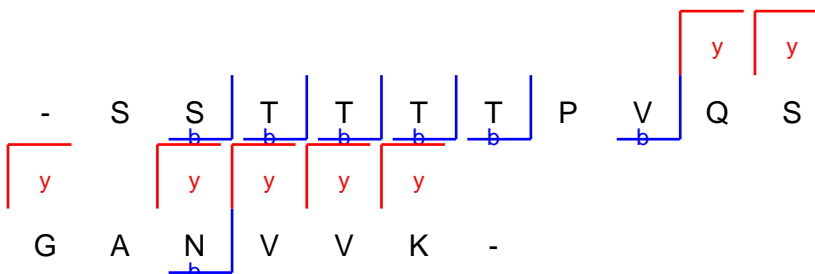

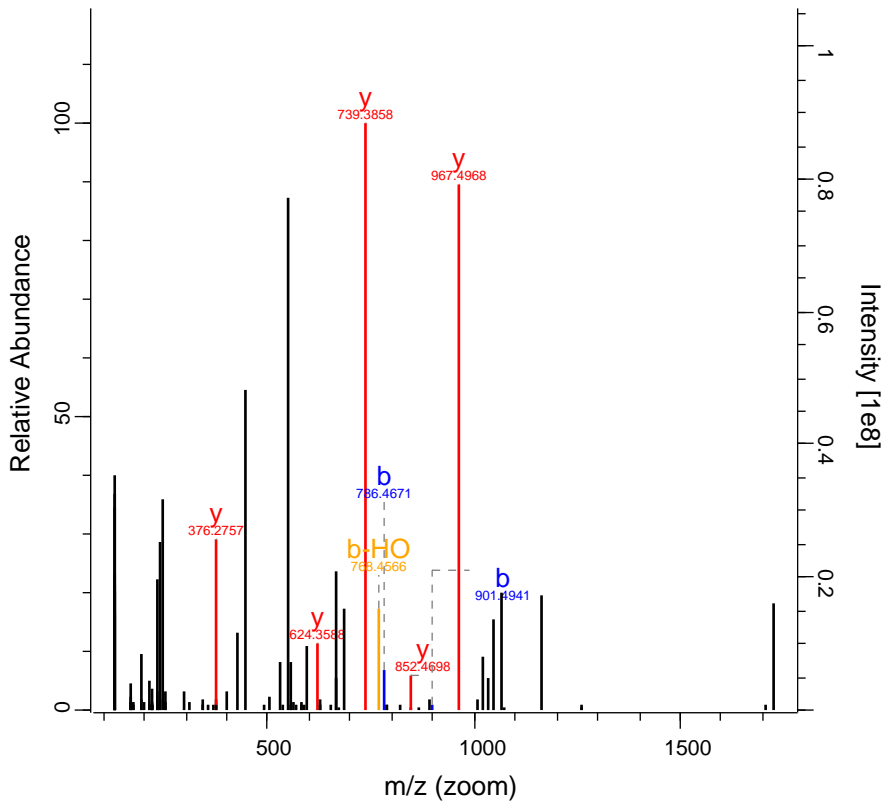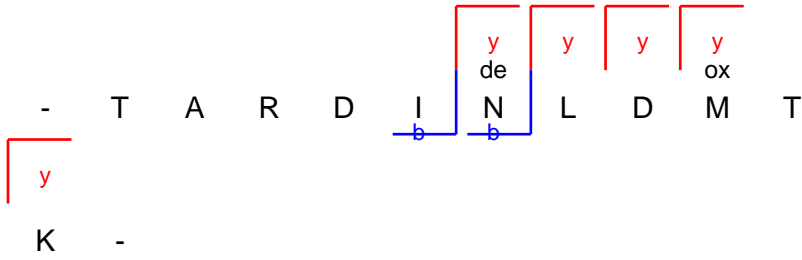

RO-QC-160121\_ZackD\_SS\_Set\_01\_Fractio 15233 FTMS; HC 109.79 739.93 APITD1

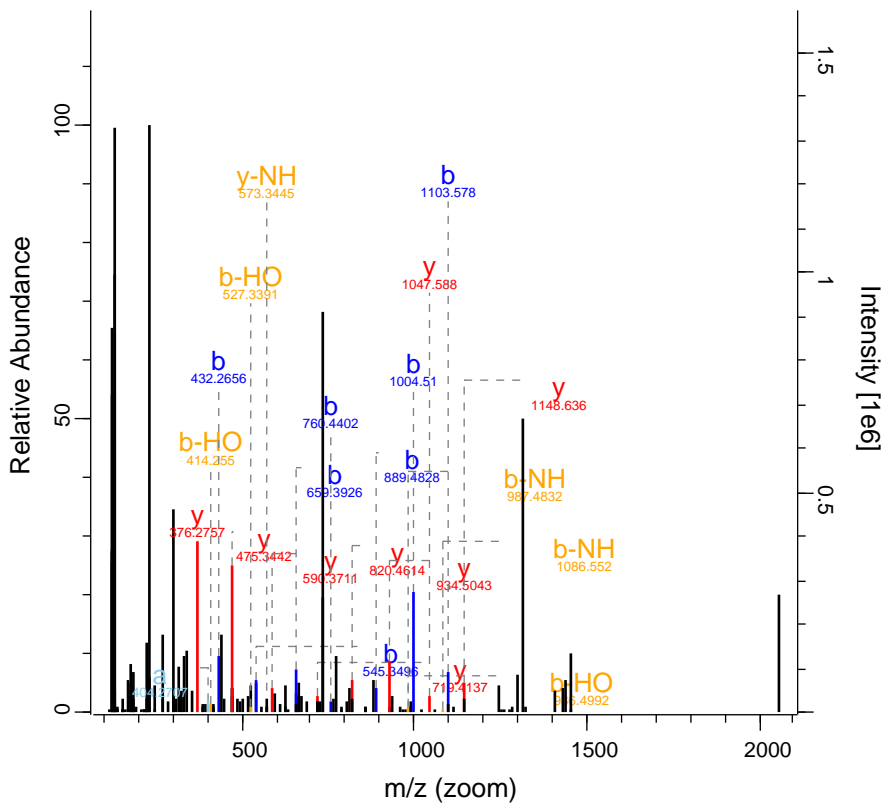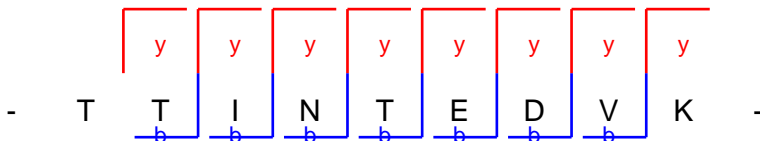

RO-QC-160121\_ZackD\_SS\_Set\_01\_Fraction 17148 FTMS; HC 88.26 745.66 BSCL2

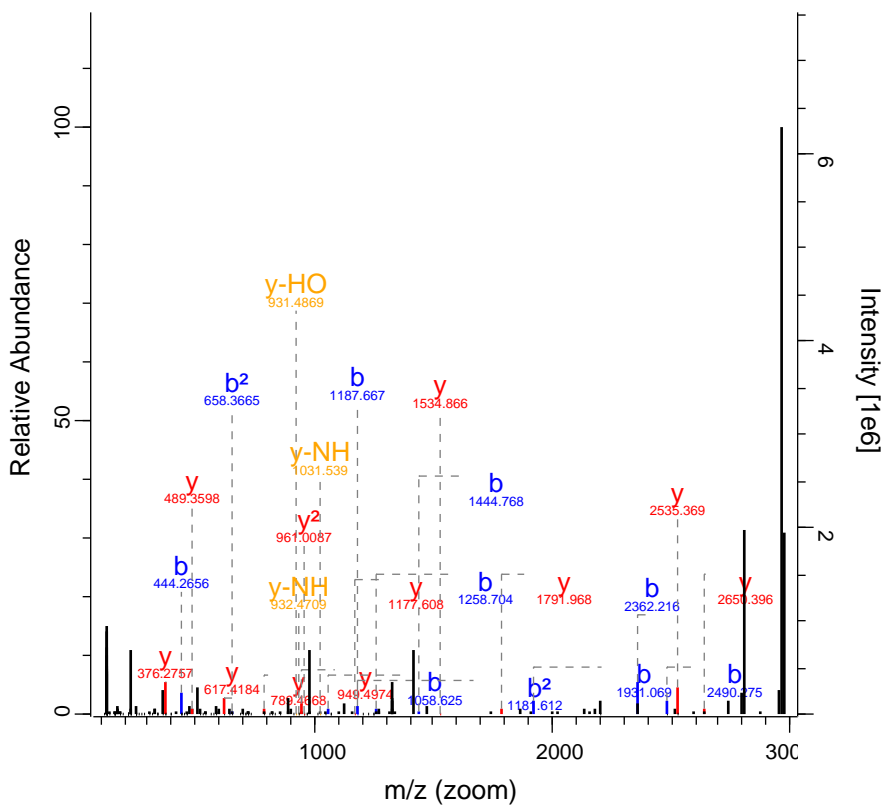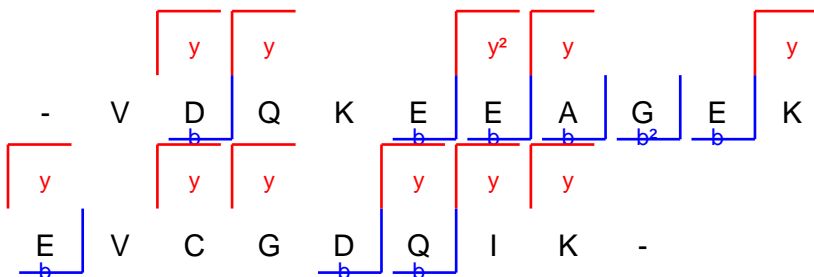

RO-QC-160121\_ZackD\_SS\_Set\_01\_Fractio 17181 FTMS; HC 121.71 949.46 FOXJ3

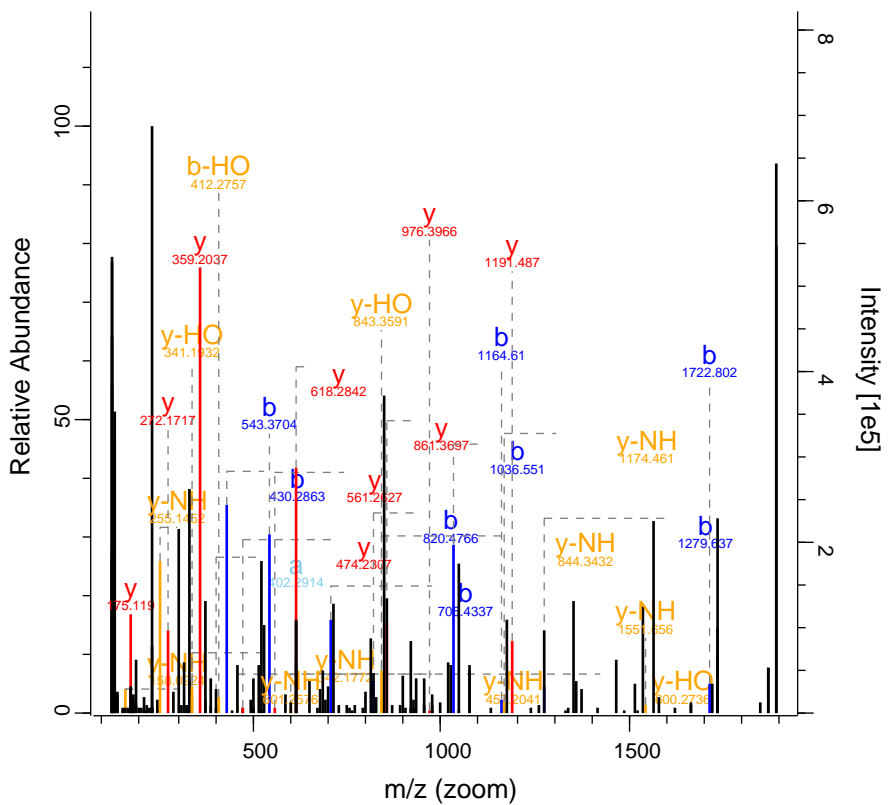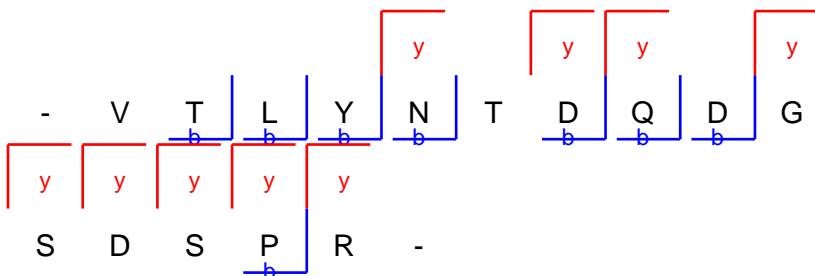

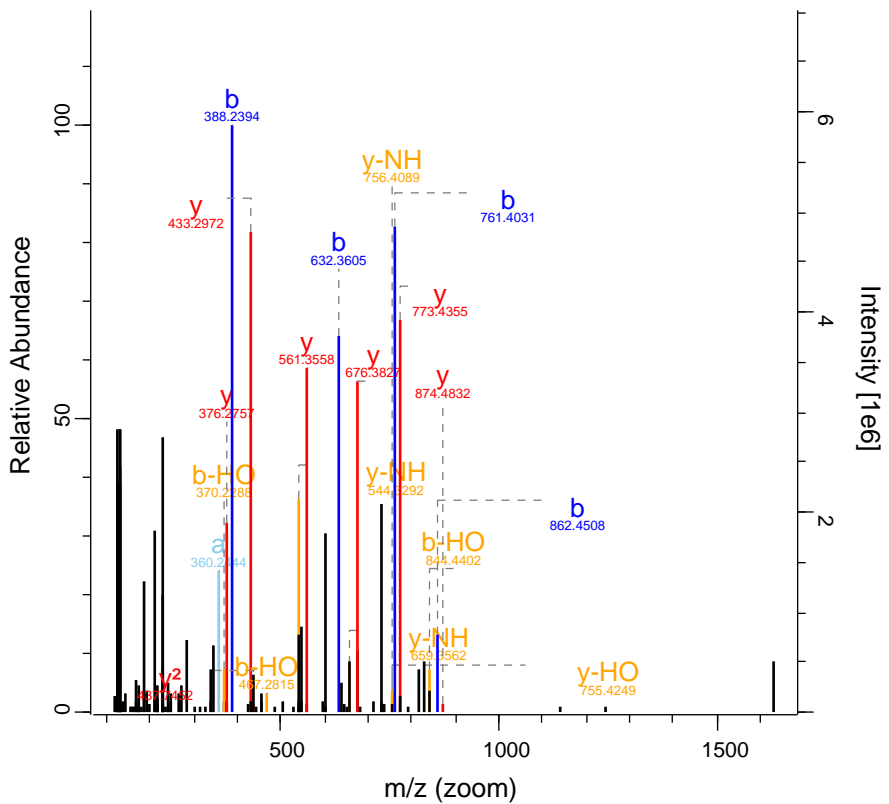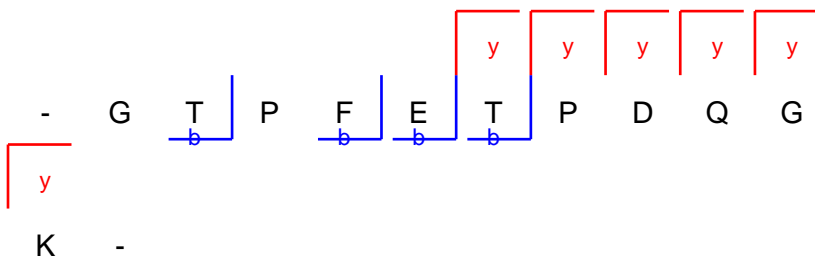



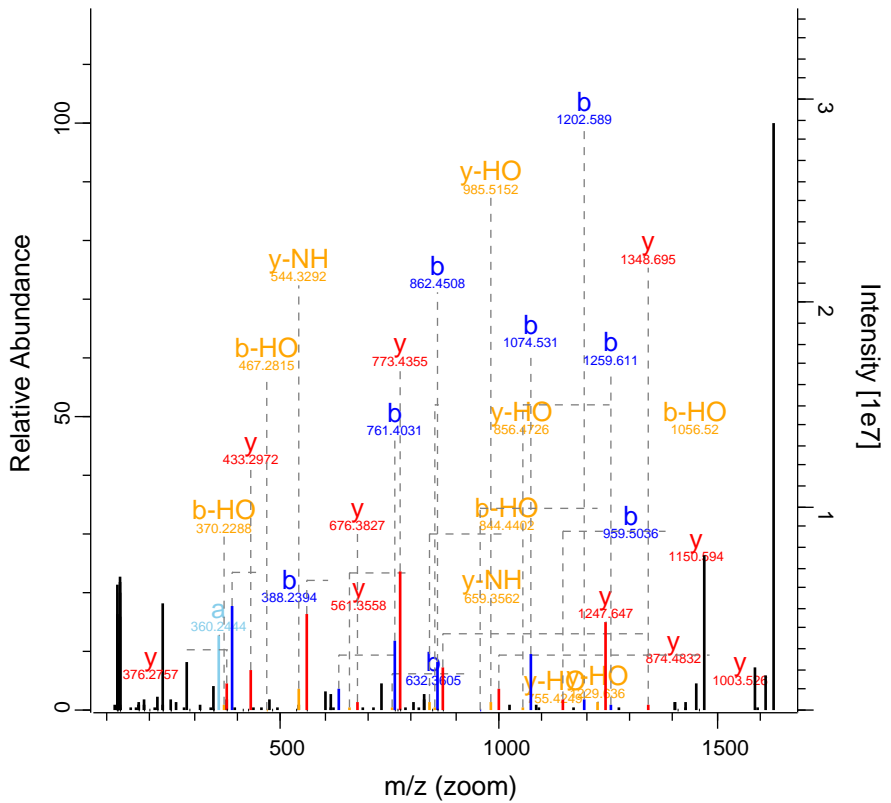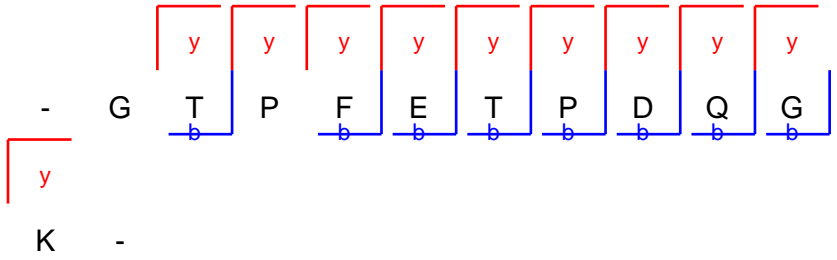

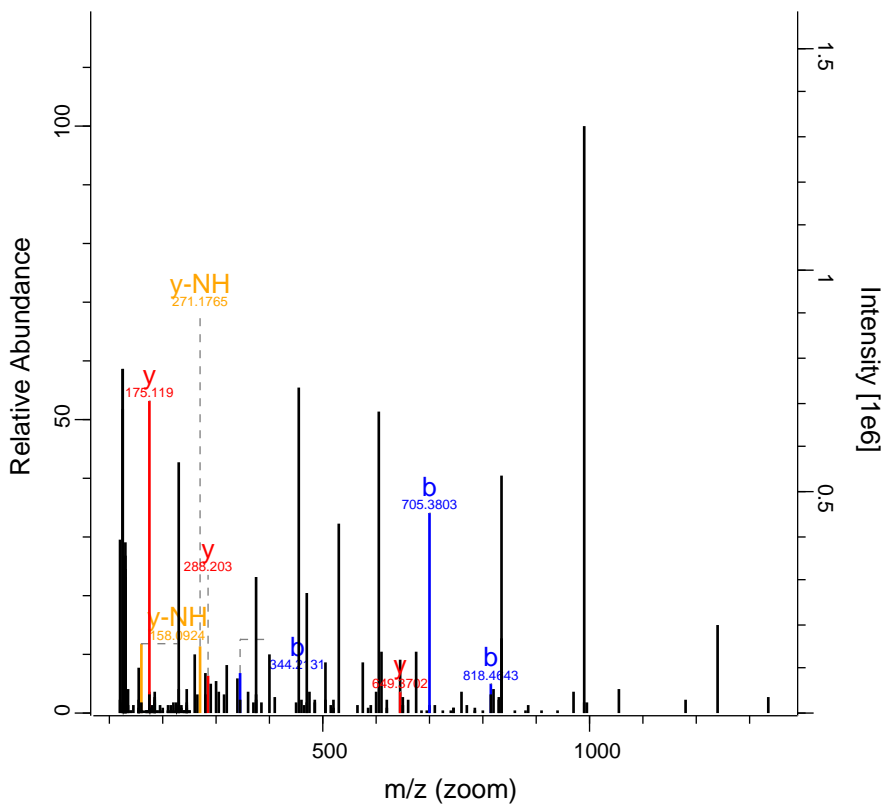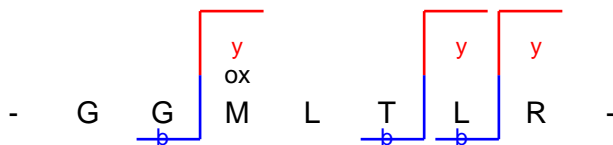

RO-QC-160121\_ZackD\_SS\_Set\_01\_Fractio 17913 FTMS; HC 152.97 806.92 TRAM2

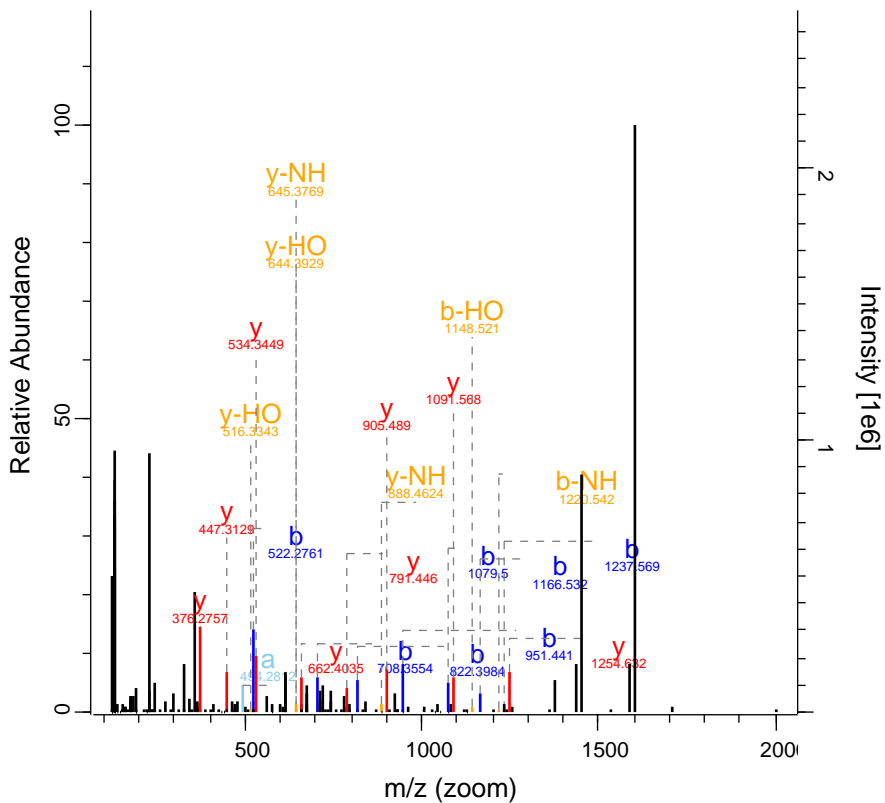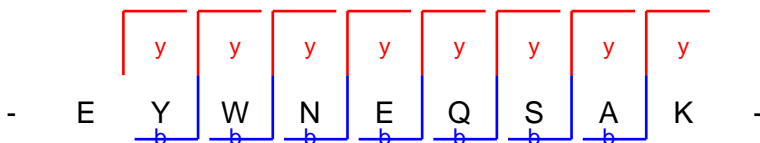

RO-QC-160121\_ZackD\_SS\_Set\_01\_Fraction 18055 FTMS; HC 66.6 525.64 SESTD1

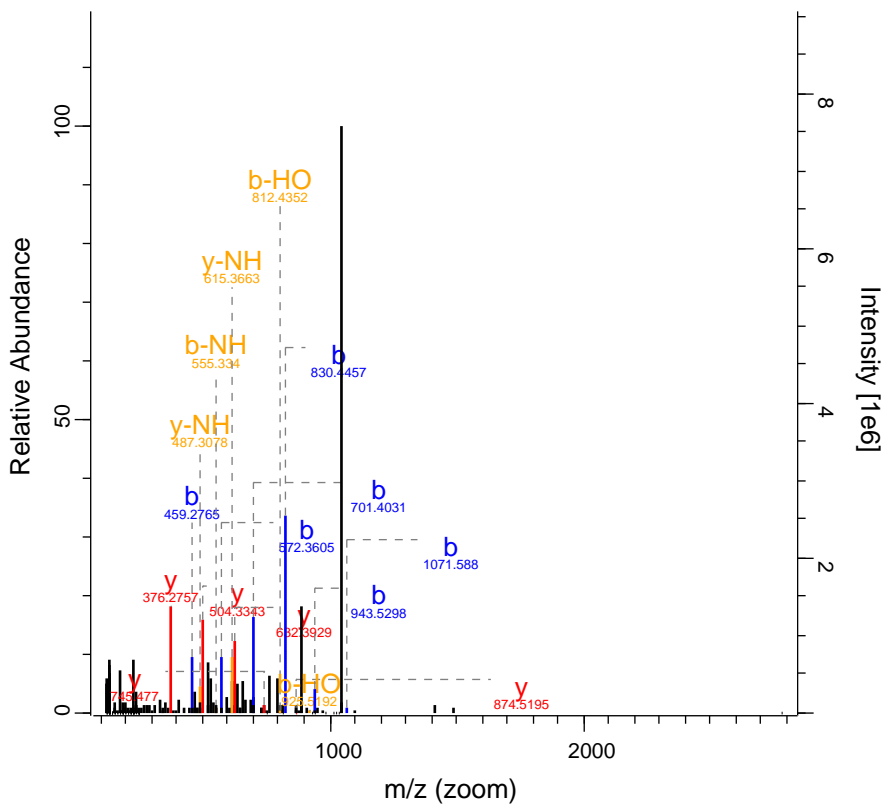

m/z (zoom)

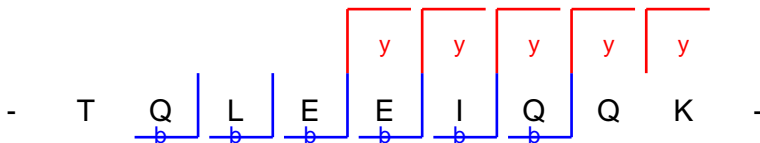

RO-QC-160121\_ZackD\_SS\_Set\_01\_Fraction 18058 FTMS; HC 97.46 787.96 SESTD1

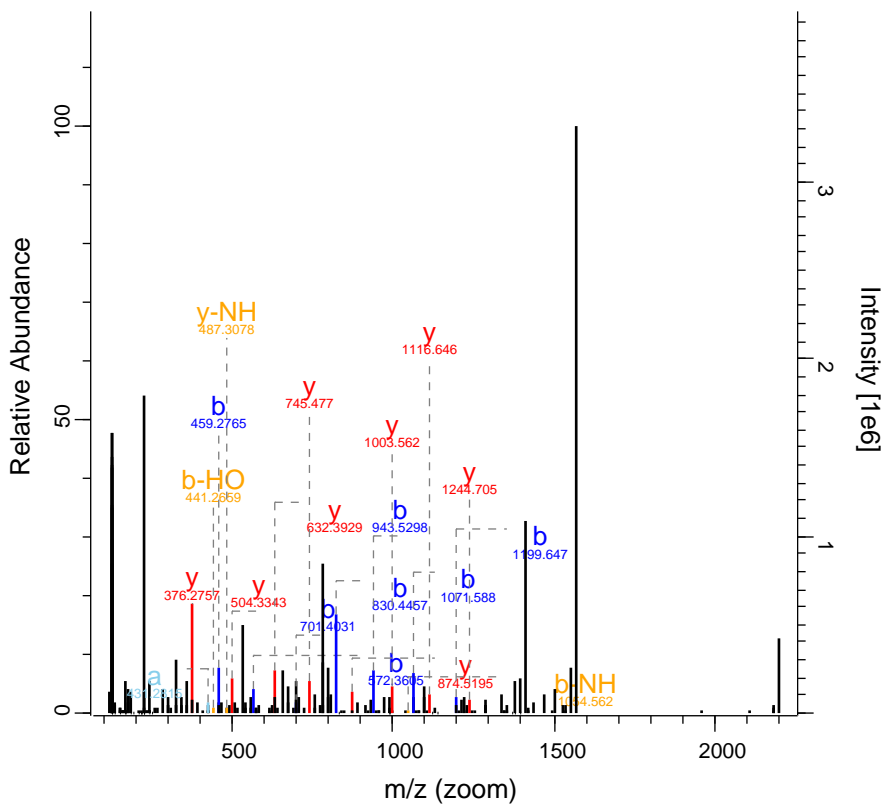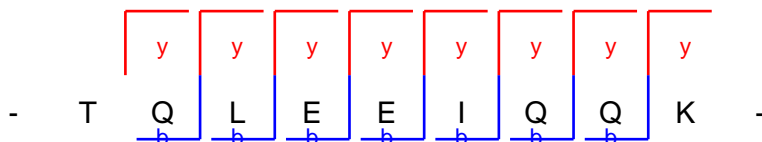

RO-QC-160121\_ZackD\_SS\_Set\_01\_Fractio 18754 FTMS; HC 126.39 495.95 WBP1L

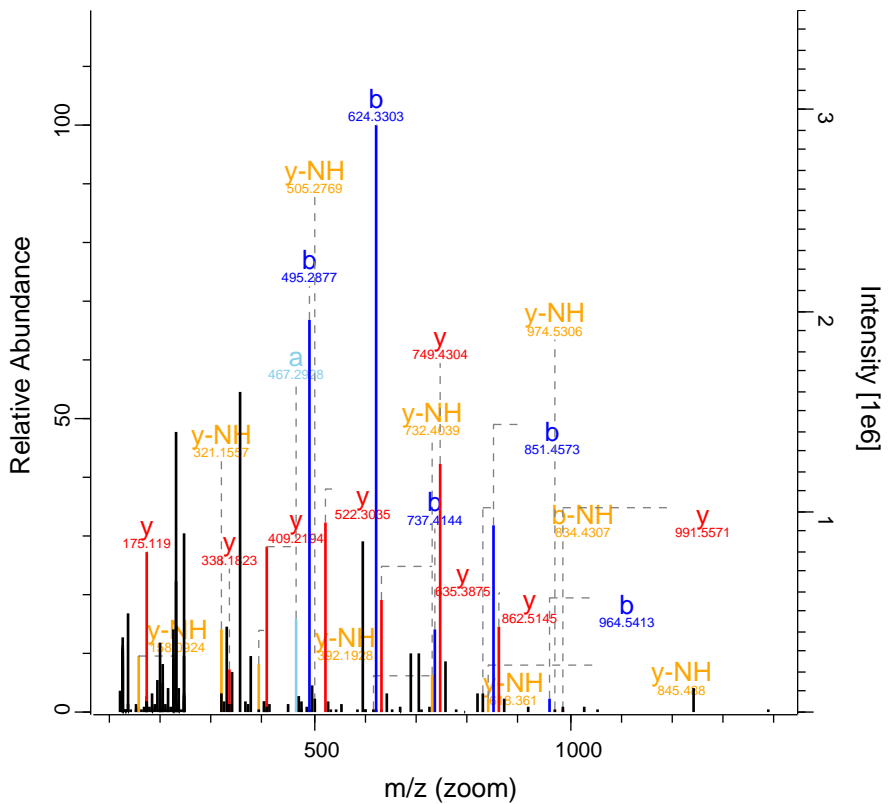

m/z (zoom)

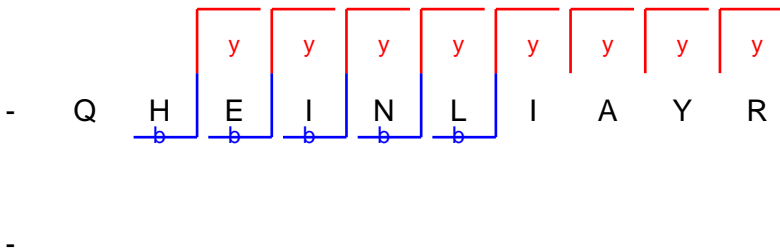

RO-QC-160121\_ZackD\_SS\_Set\_01\_Fraction 18941 FTMS; HC 41.24 515.78 MMRN1

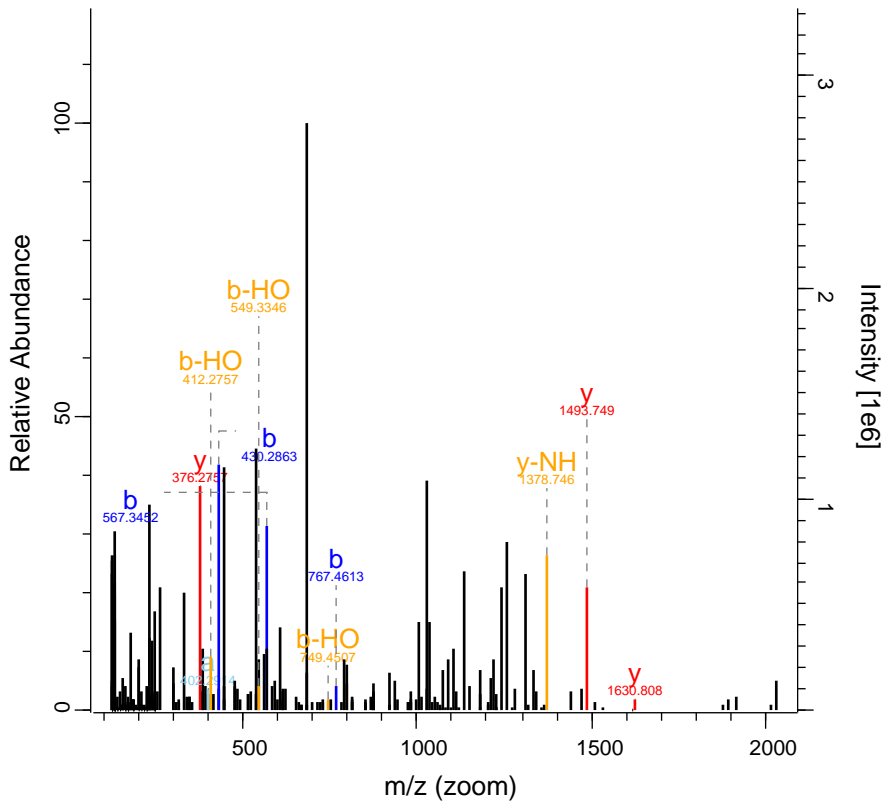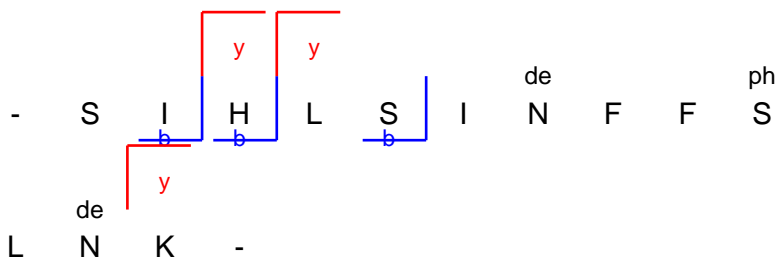

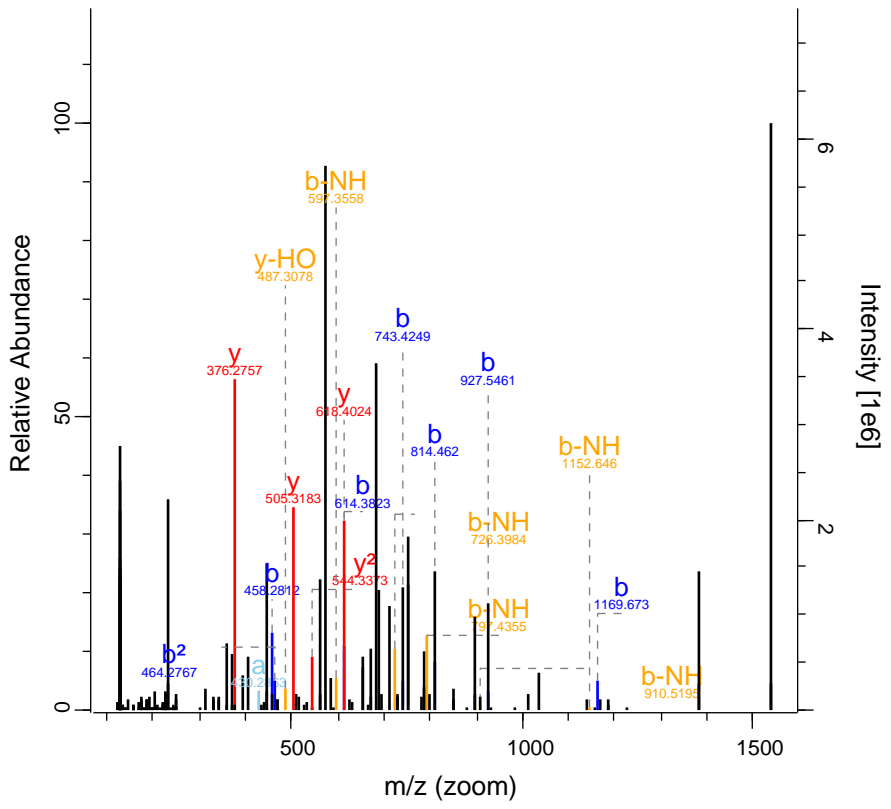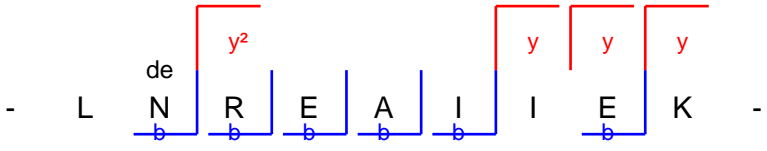



RO-QC-160121\_ZackD\_SS\_Set\_01\_Fraction 20143 FTMS; HC 61.48 582.68 WWC3

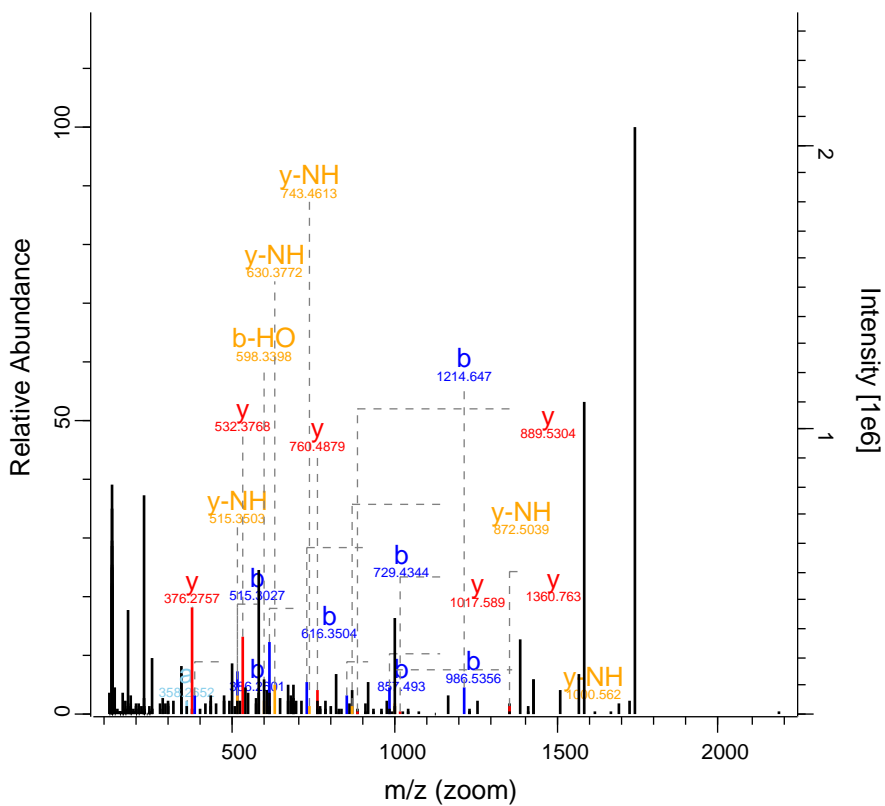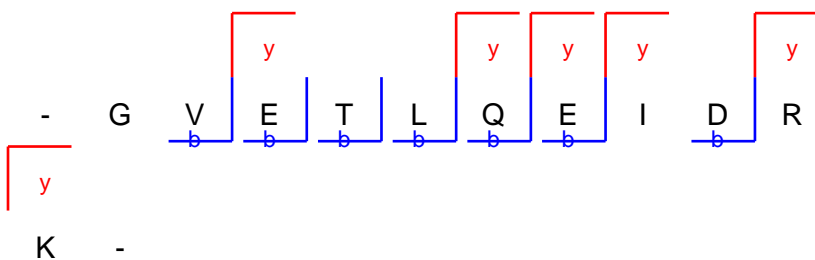

K

RO-QC-160121\_ZackD\_SS\_Set\_01\_Fraction 20239 FTMS; HC 75.39 493.93 FRMD6

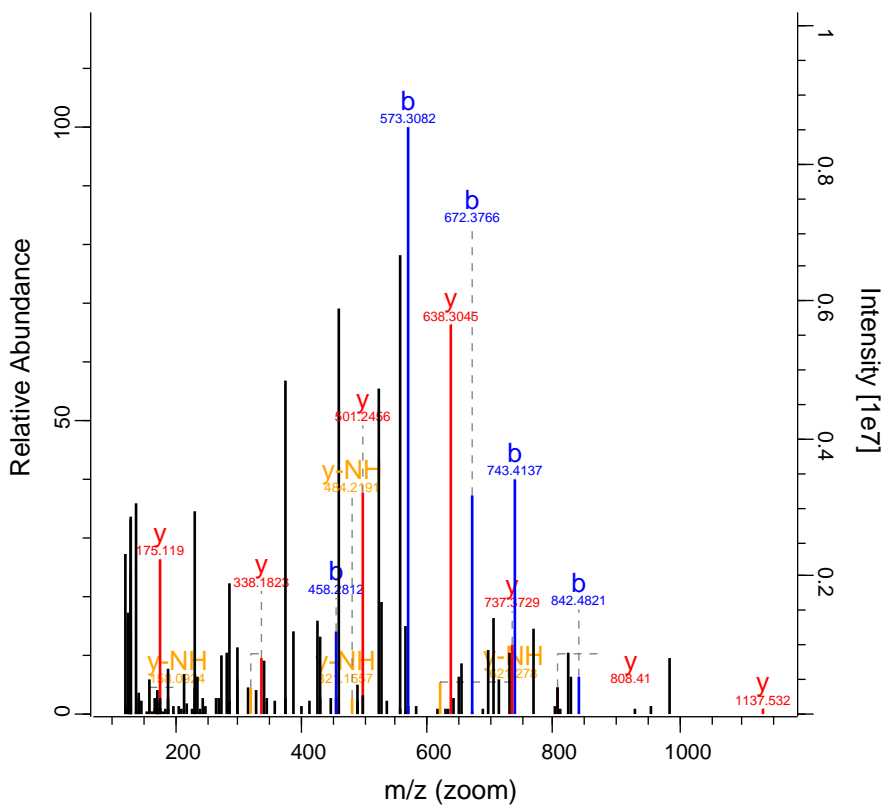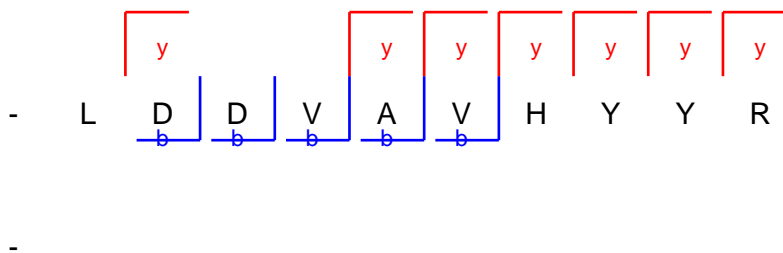

RO-QC-160121\_ZackD\_SS\_Set\_01\_Fractio 20270 FTMS; HC 111.91 534.56 REEP1

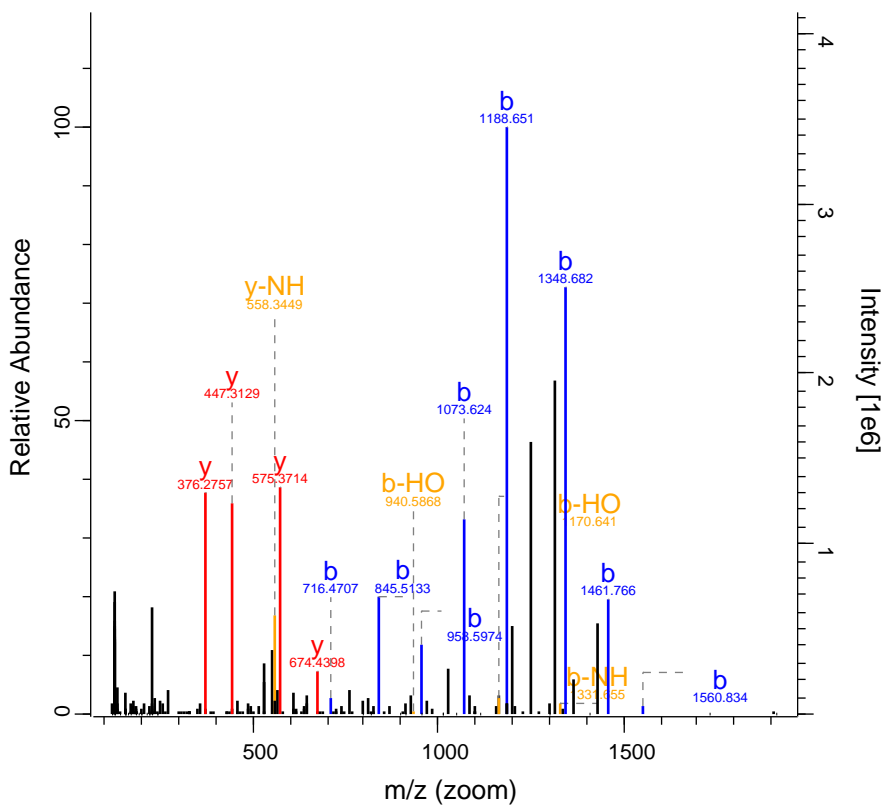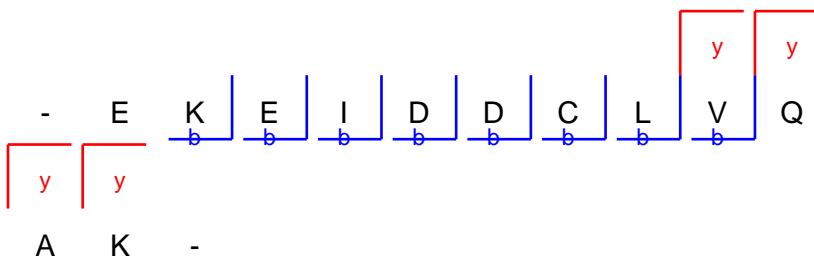

RO-QC-160121\_ZackD\_SS\_Set\_01\_Fractio 20288 FTMS; HC 126.95 712.41 REEP1

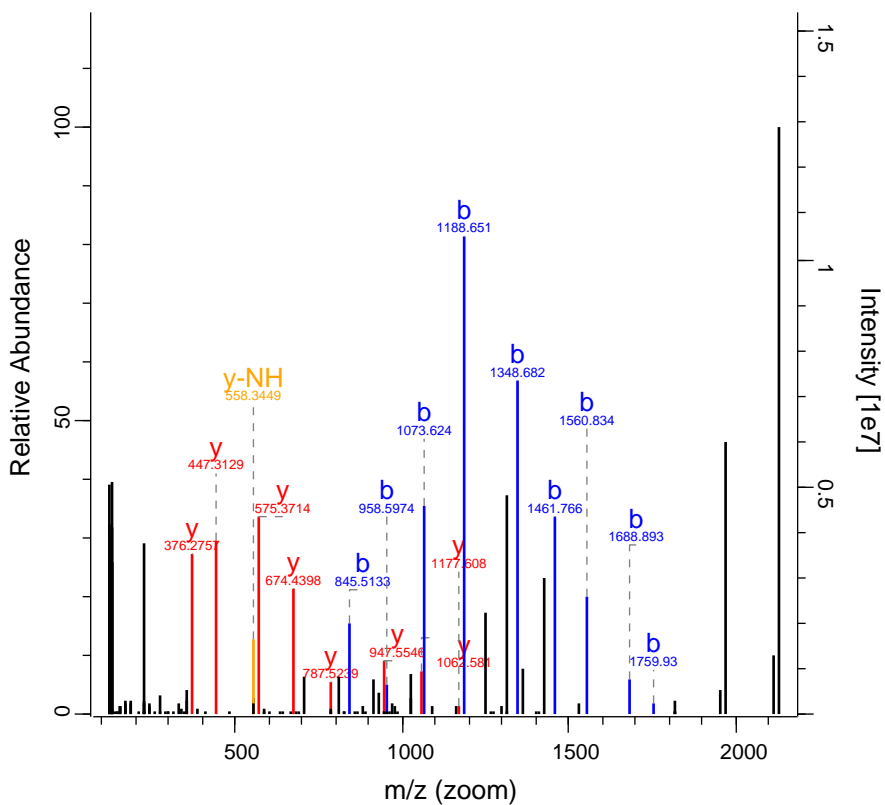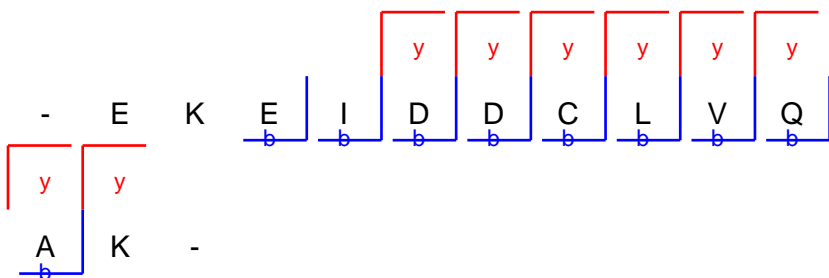

RO-QC-160121\_ZackD\_SS\_Set\_01\_Fractio 20313 FTMS; HC 125.75 439.49 MED10

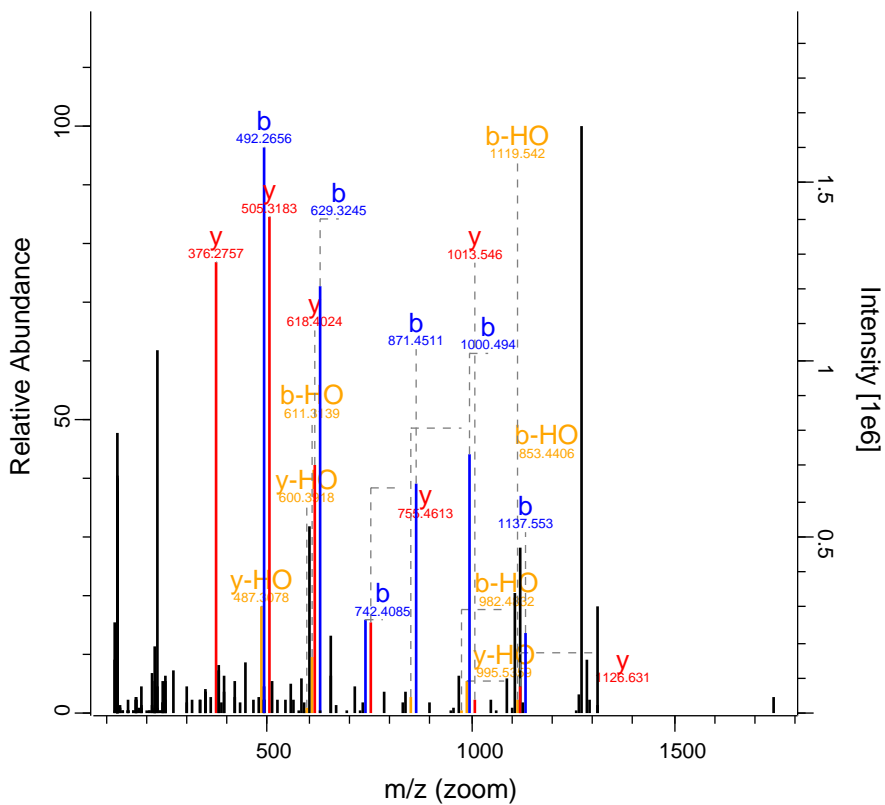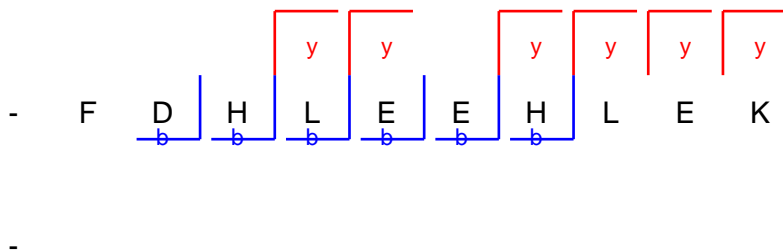

RO-QC-160121\_ZackD\_SS\_Set\_01\_Fraction 20403 FTMS; HC 57.75 723.36 SVEP1

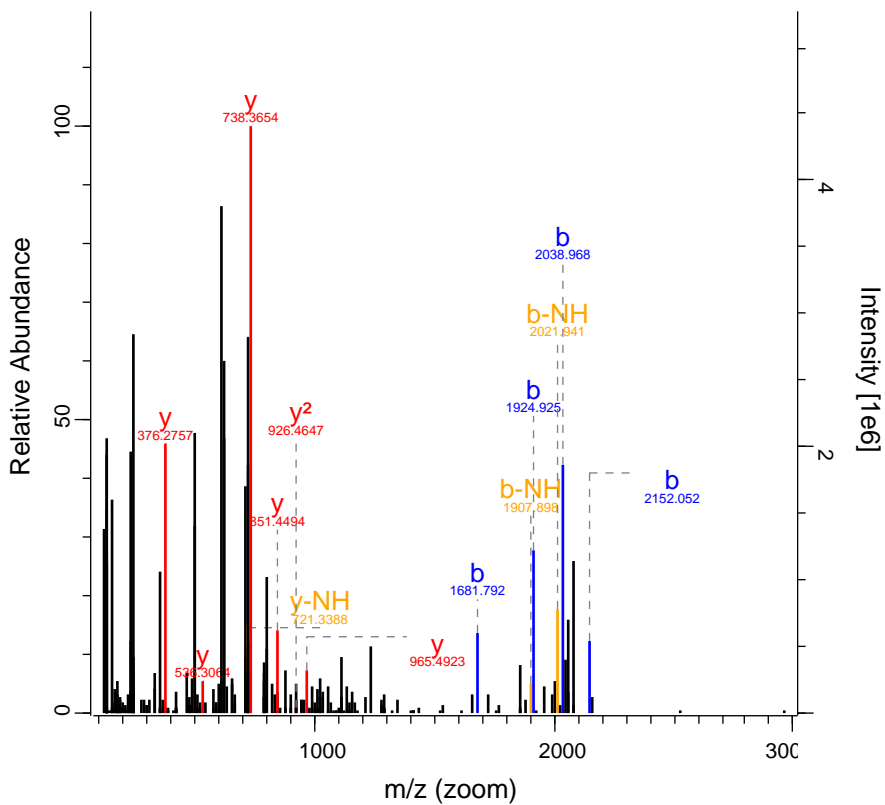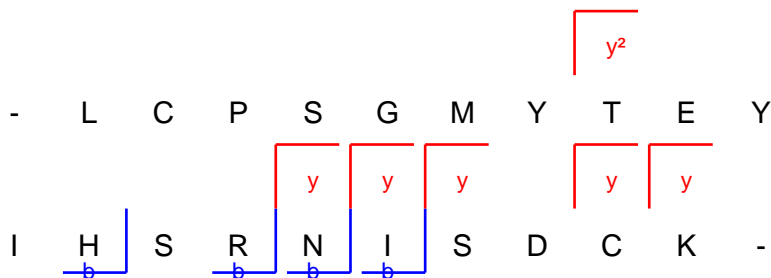

RO-QC-160121\_ZackD\_SS\_Set\_01\_Fractio 20565 FTMS; HC 100.79 840.44 CDC42EP3

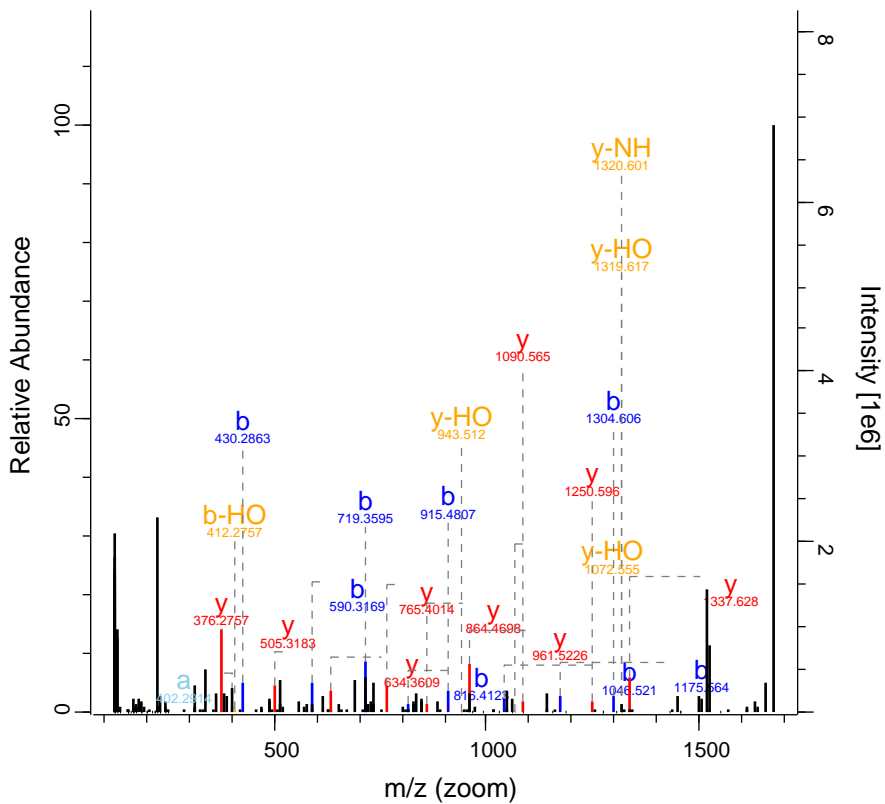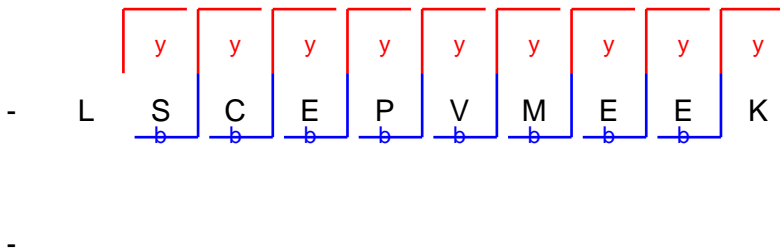

RO-QC-160121\_ZackD\_SS\_Set\_01\_Fraction 20744 FTMS; HC 80.24 423.25 ZNF536

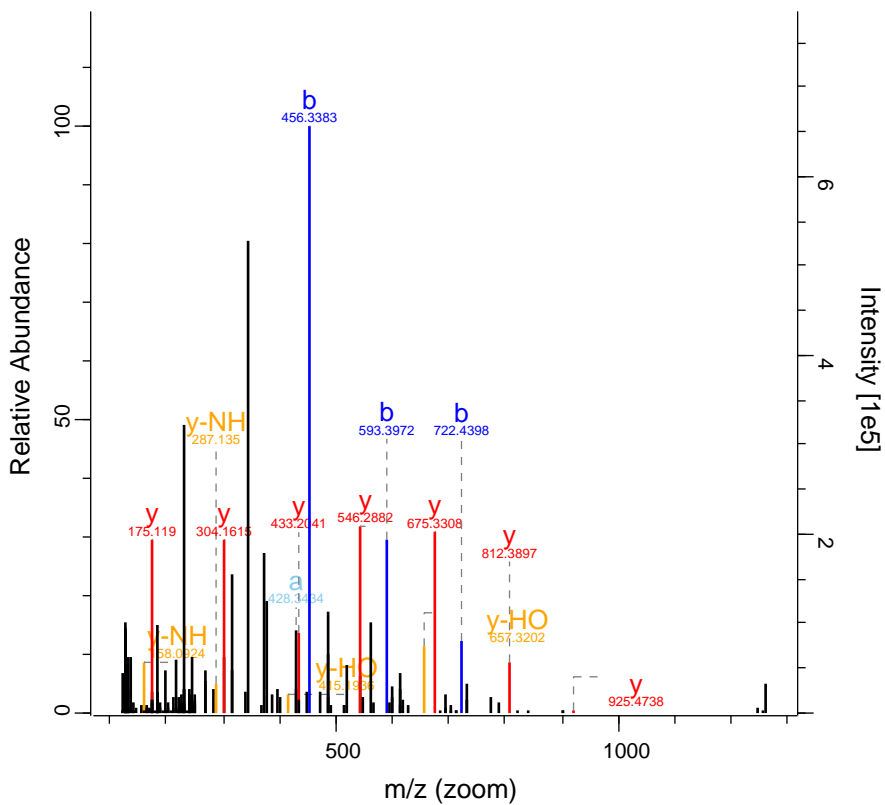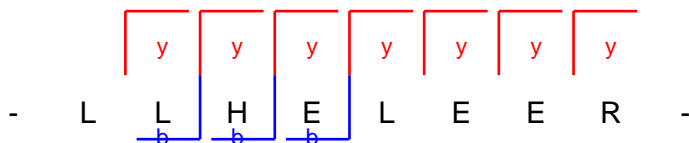



RO-QC-160121\_ZackD\_SS\_Set\_01\_Fractic 21930 FTMS; HC 97.46 1035.06 TRPV2

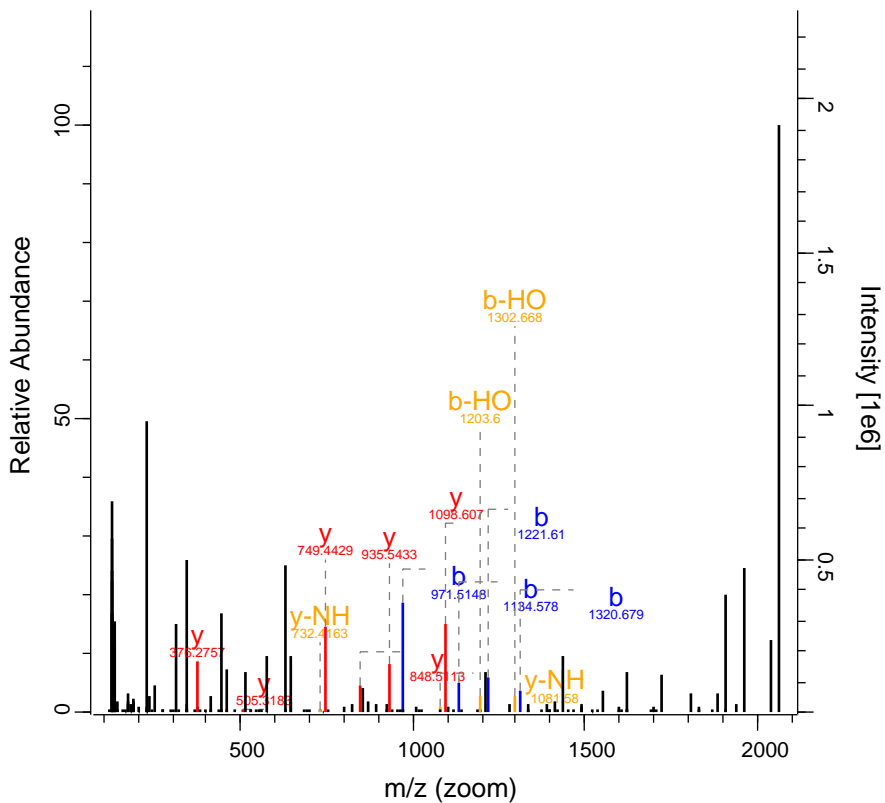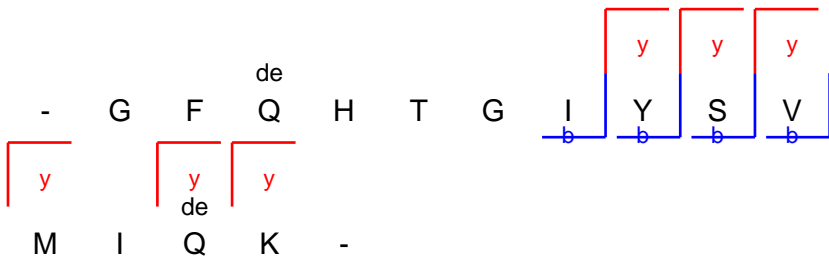

RO-QC-160121\_ZackD\_SS\_Set\_01\_Fraction 22513 FTMS; HC 81.16 708.36 SLC25A15

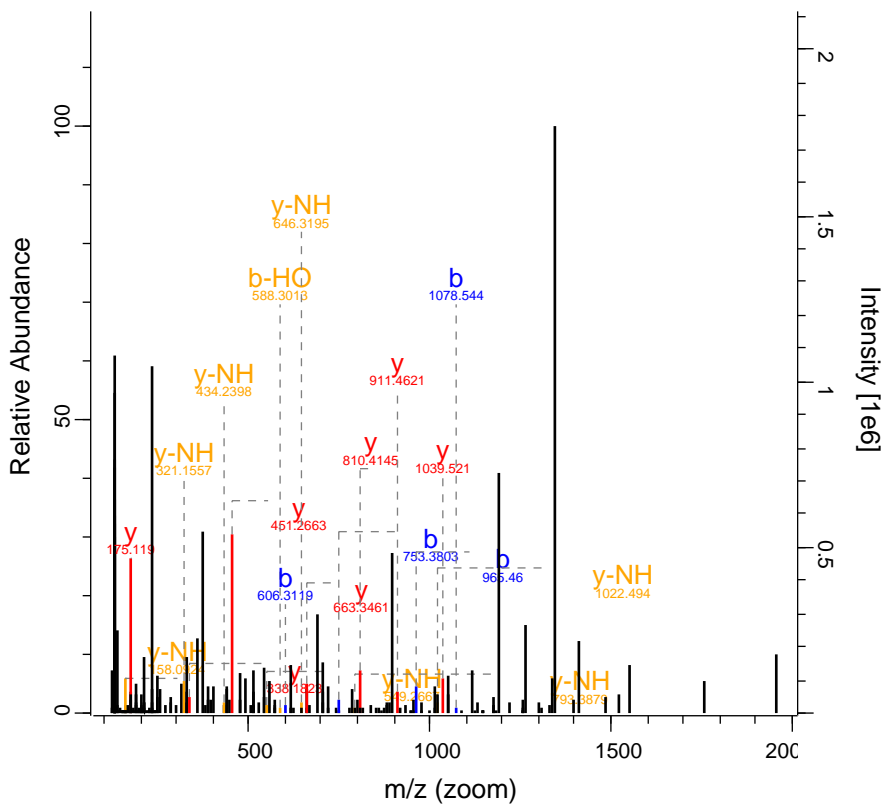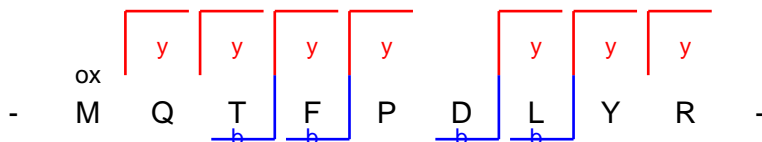



RO-QC-160121\_ZackD\_SS\_Set\_01\_Fractio 23810 FTMS; HC 105.14 637.34 FBXW2

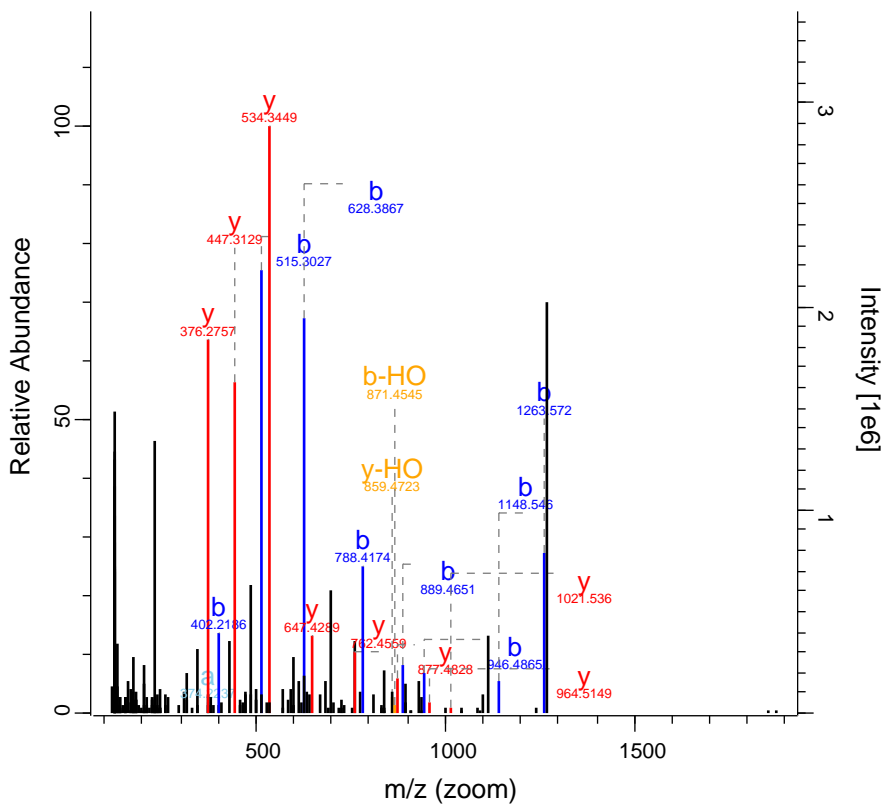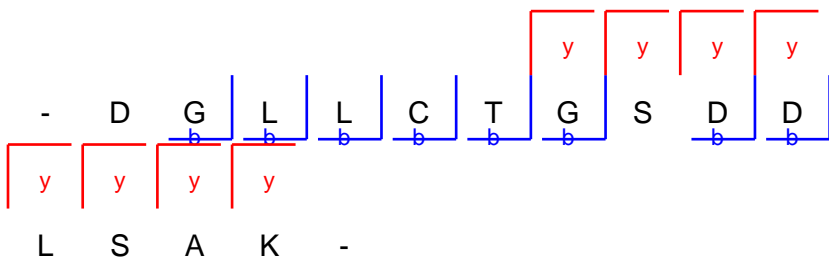

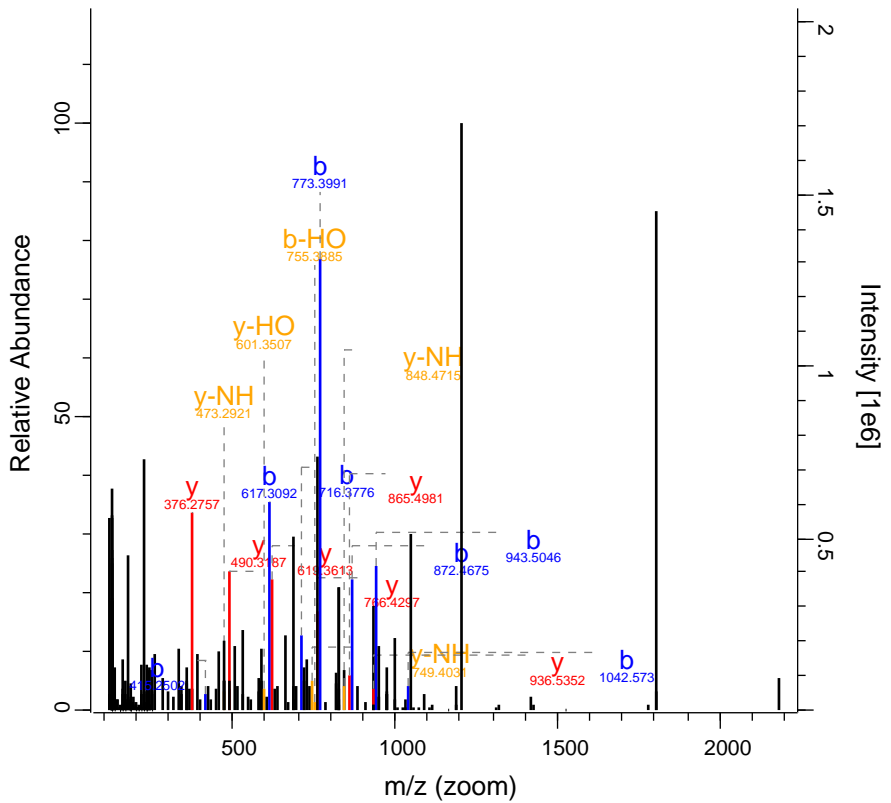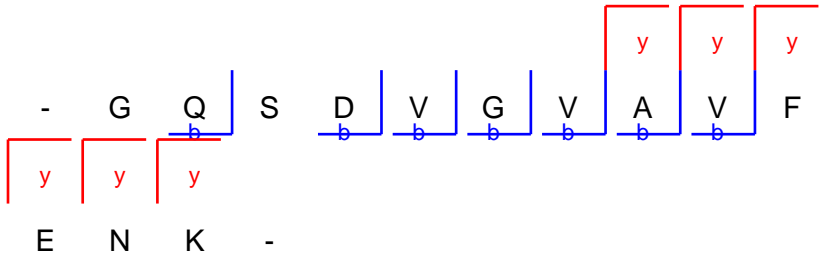

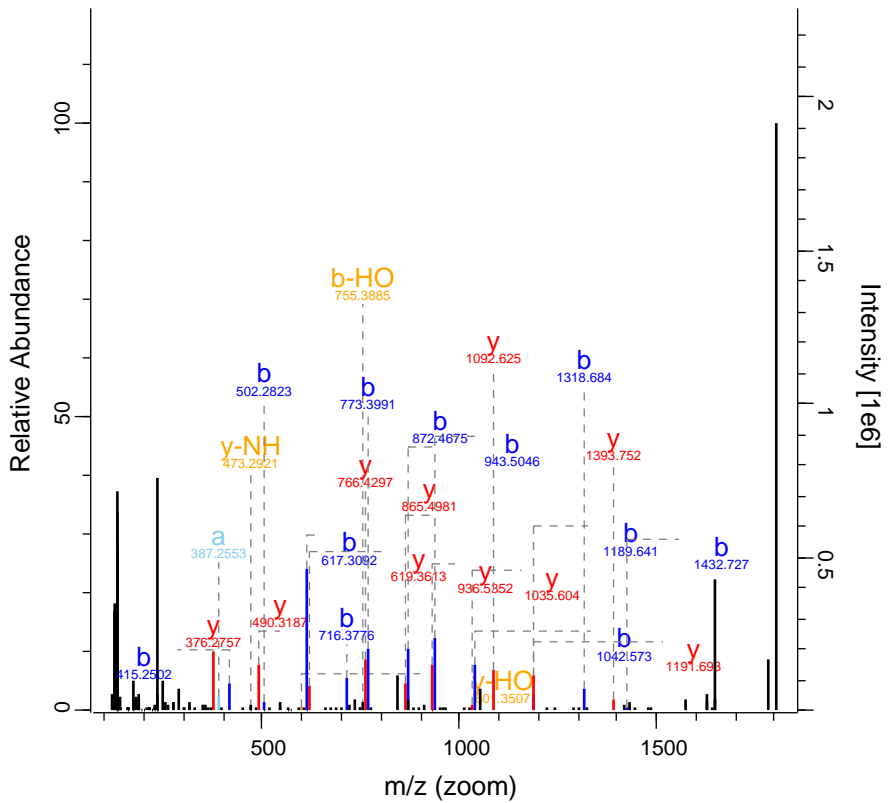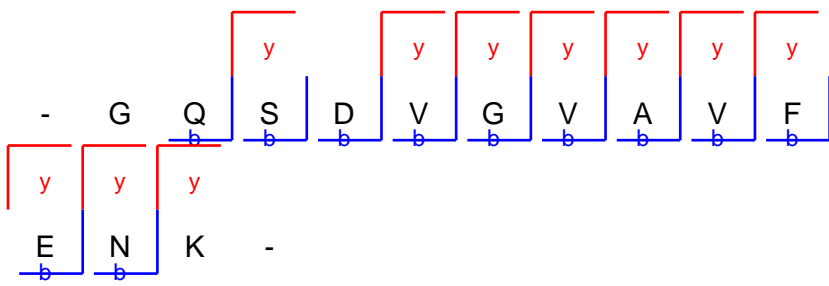

Raw File

Scan Method Score m/z

RO-QC-160121\_ZackD\_SS\_Set\_01\_Fraction\_1

24316 FTMS; HCD 118.71 874.99

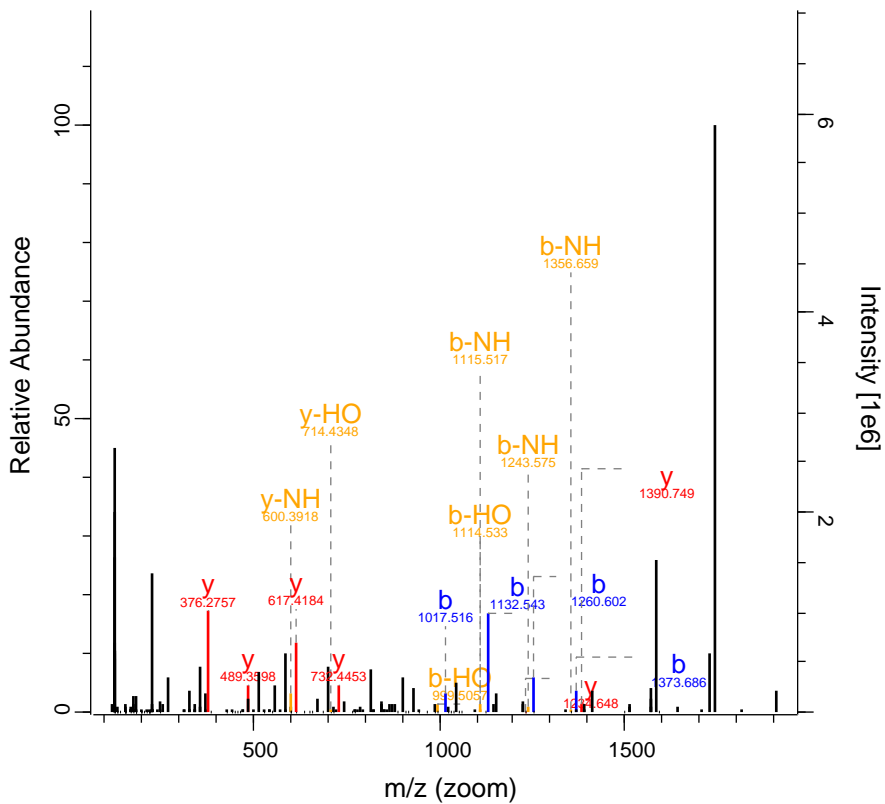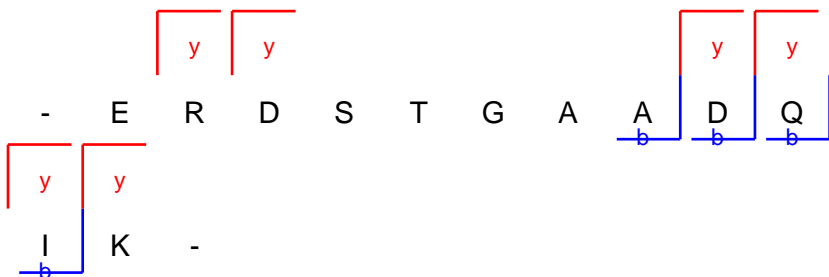

RO-QC-160121\_ZackD\_SS\_Set\_01\_Fractio 24437 FTMS; HC 120.45 531.32 MAP4K2

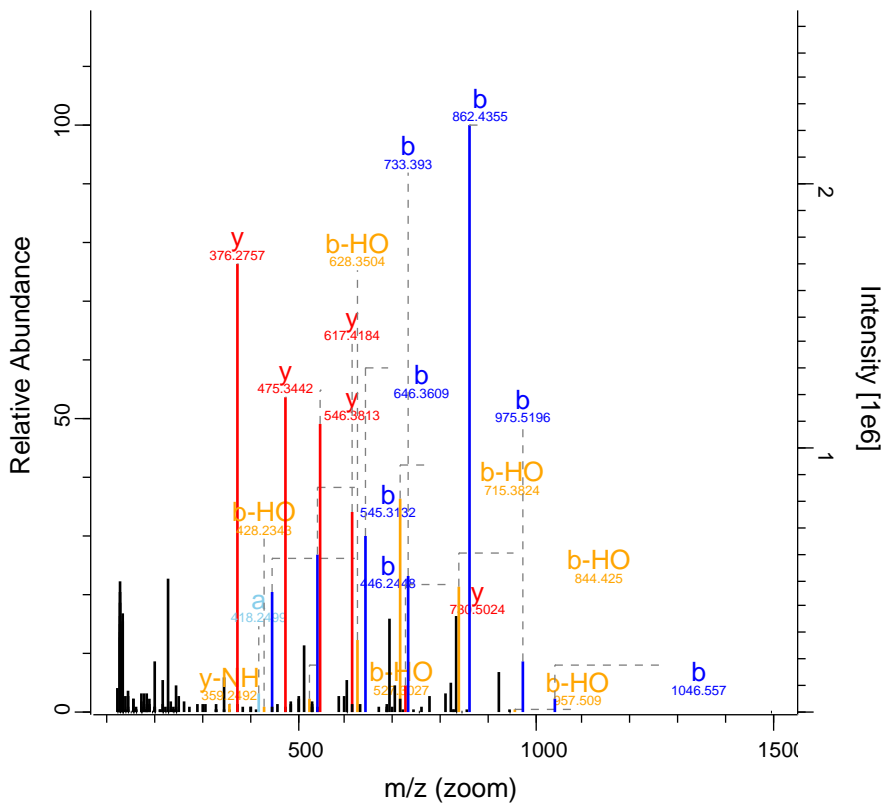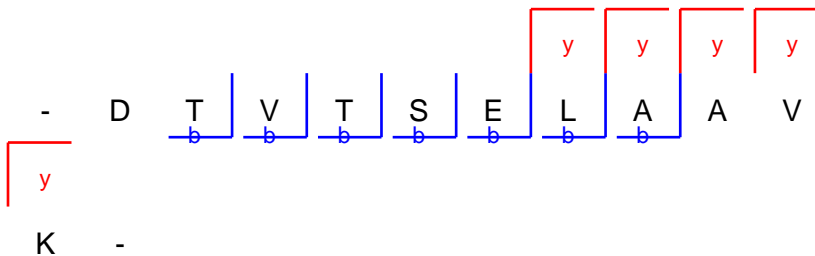





RO-QC-160121\_ZackD\_SS\_Set\_01\_Fraction 25509 FTMS; HC 67.43 855.11 SLC31A1

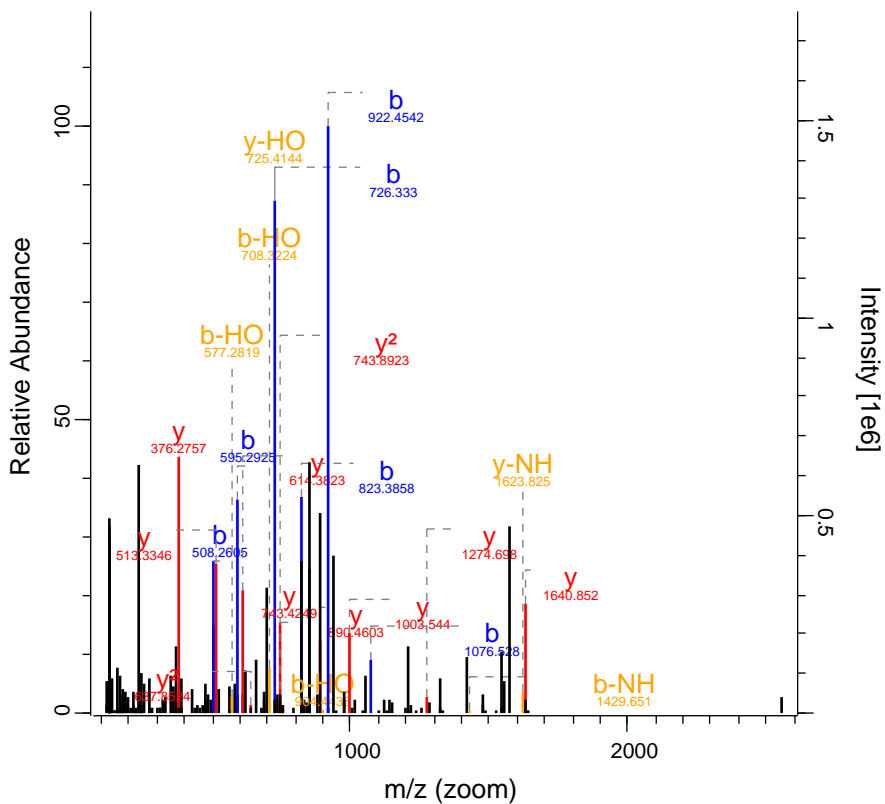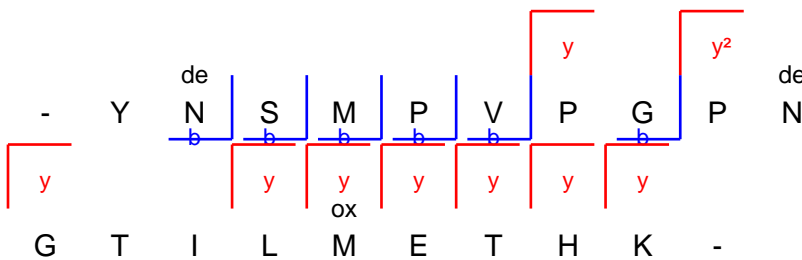

| Raw File                                | Scan  | Method    | Score | m/z    |
|-----------------------------------------|-------|-----------|-------|--------|
| RO-QC-160121_ZackD_SS_Set_01_Fraction_1 | 26166 | FTMS; HCD | 42.04 | 613.66 |

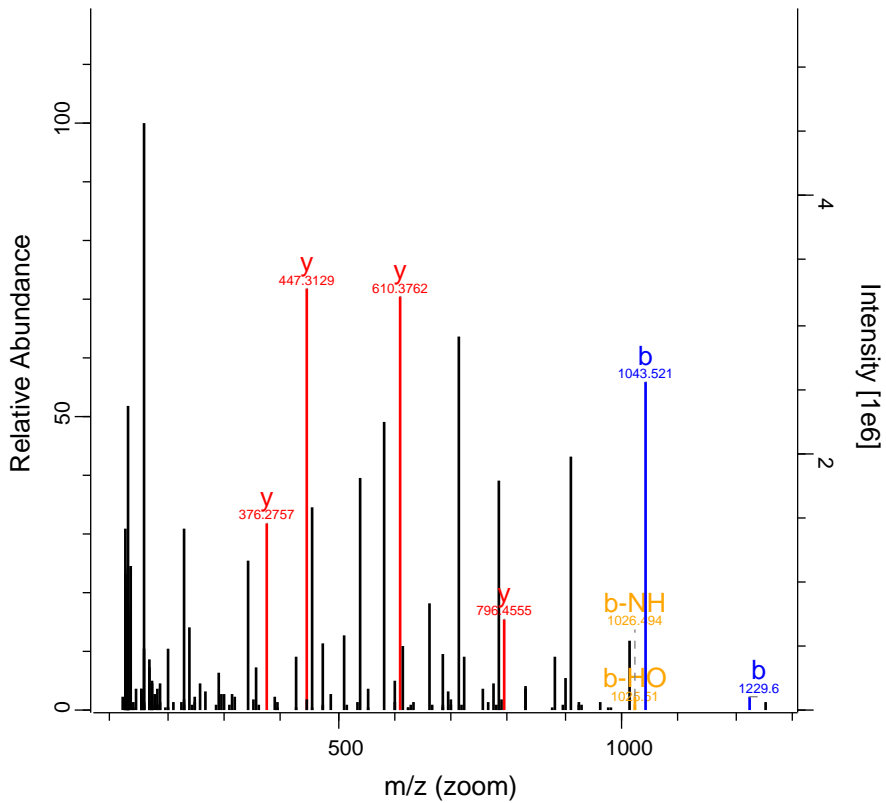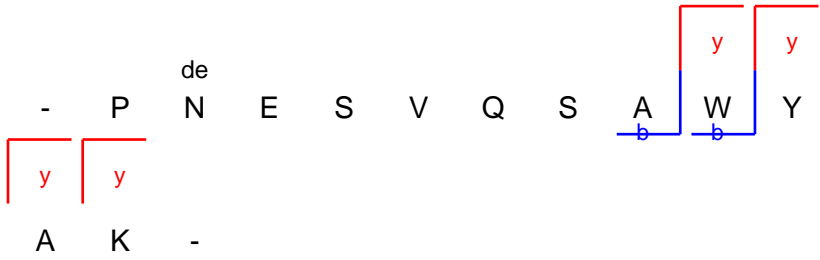

RO-QC-160121\_ZackD\_SS\_Set\_01\_Fractio 26336 FTMS; HC 112.94 702.92 CHRDL1

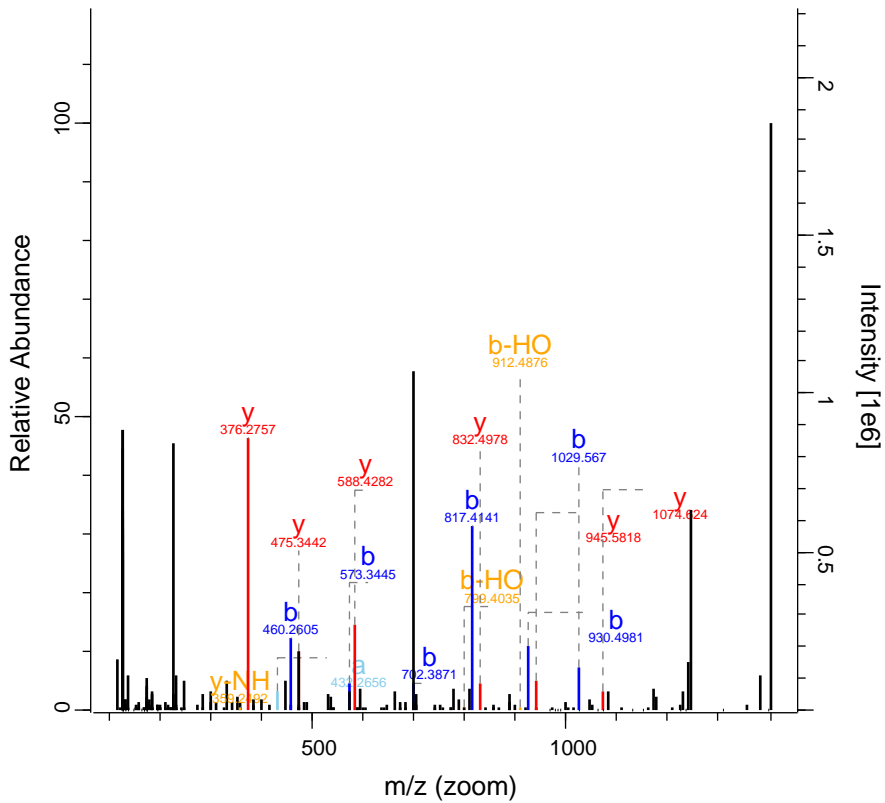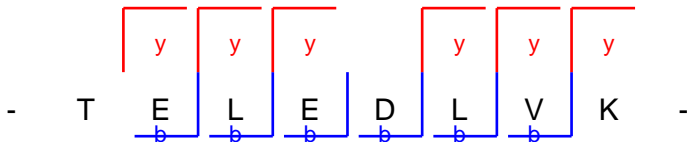

RO-QC-160121\_ZackD\_SS\_Set\_01\_Fraction 26386 FTMS; HC 74.94 687.88 FIZ1

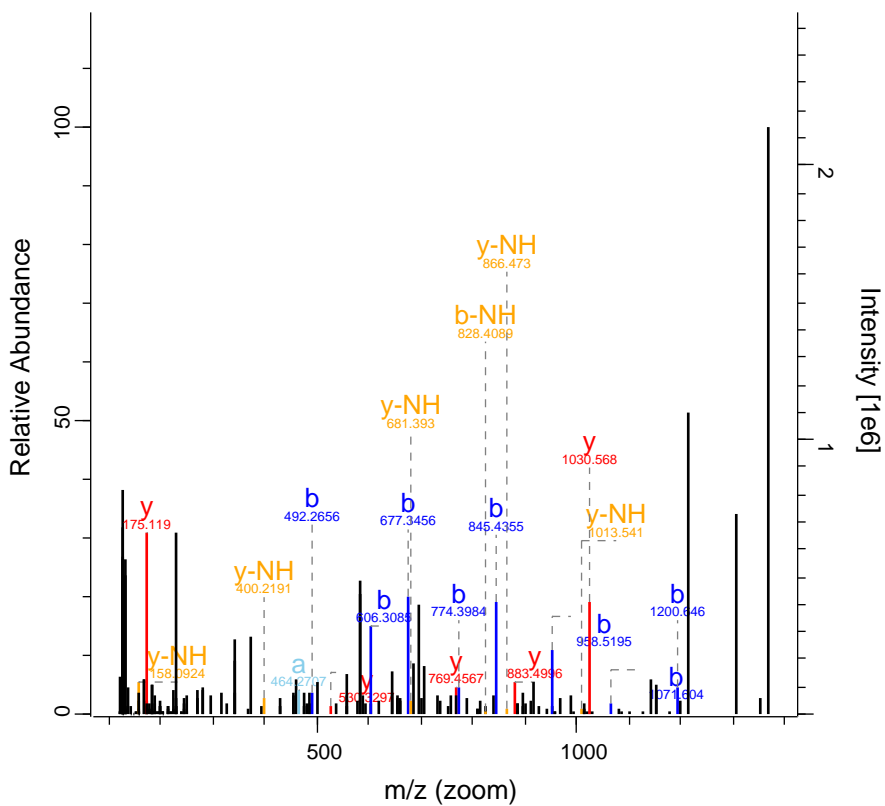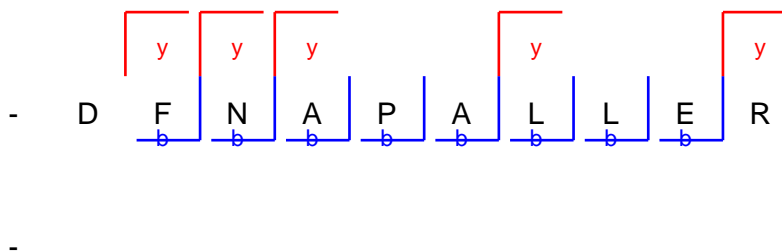



RO-QC-160121\_ZackD\_SS\_Set\_01\_Fractio 27123 FTMS; HC 148.2 910.13 DRAM2

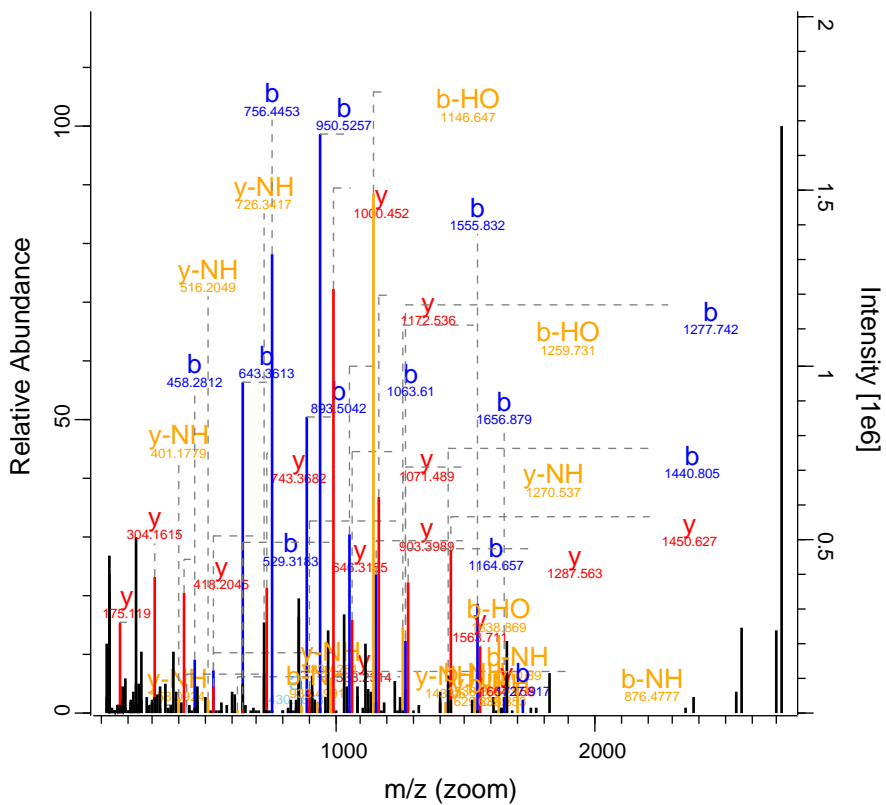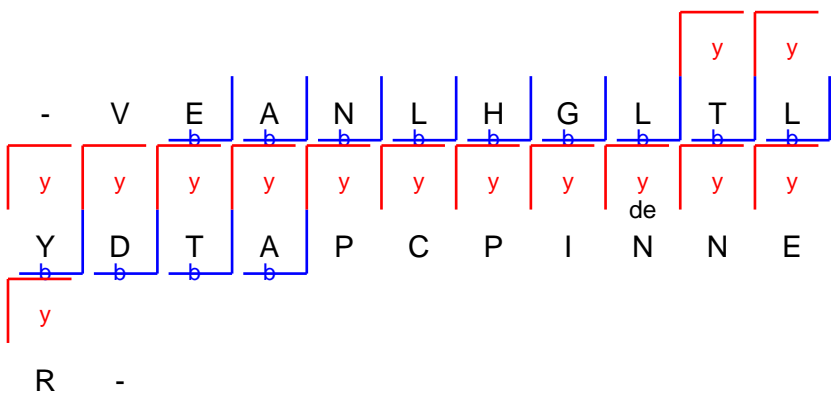

RO-QC-160121\_ZackD\_SS\_Set\_01\_Fractio 27138 FTMS; HC 141.58 926.97 FAM58A

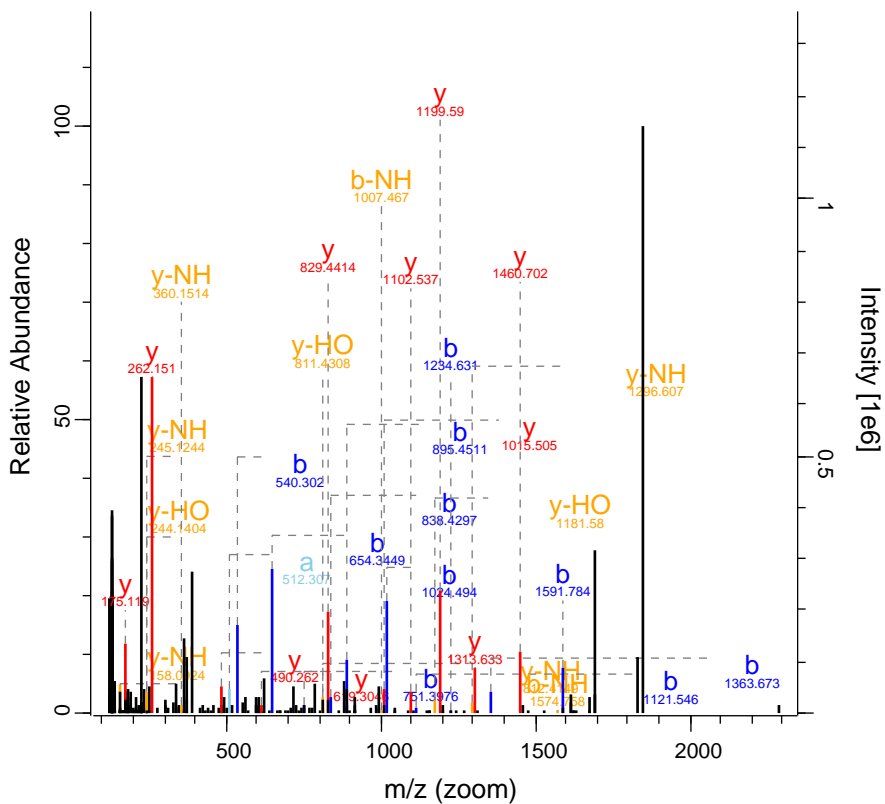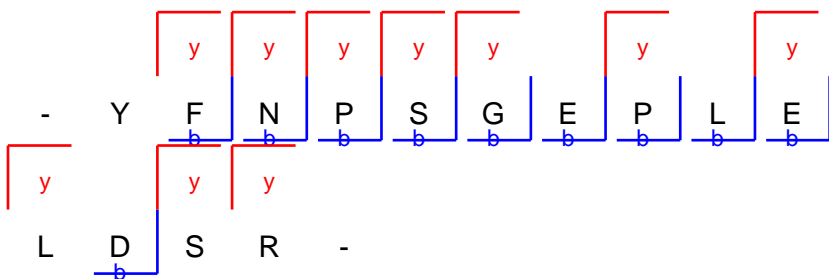



RO-QC-160121\_ZackD\_SS\_Set\_01\_Fraction 27150 FTMS; HC 49.63 696.03 RASEF

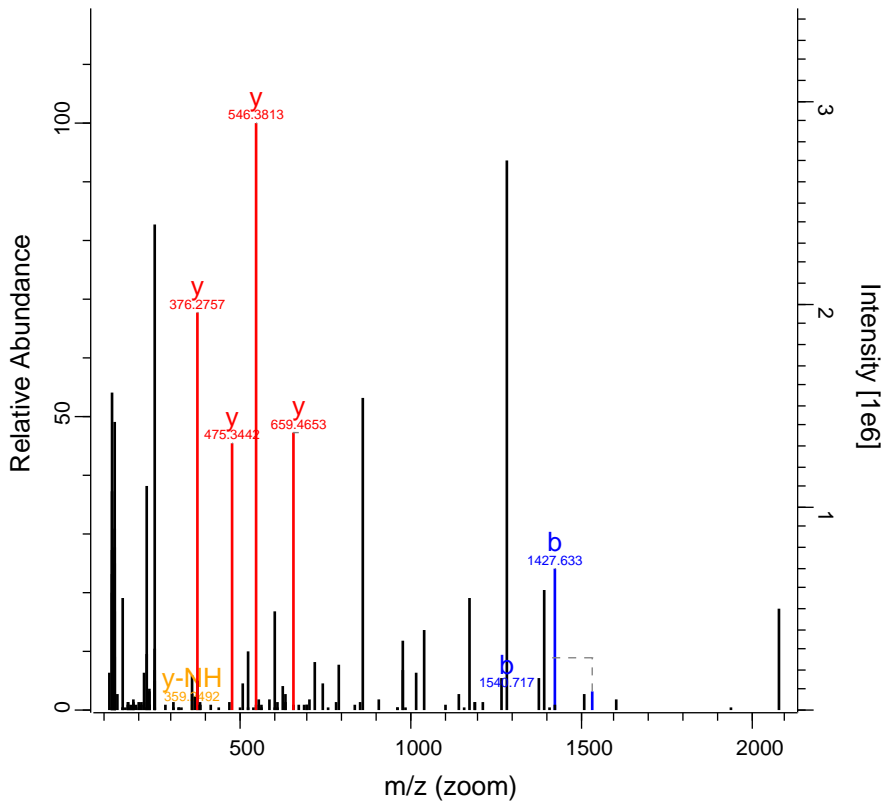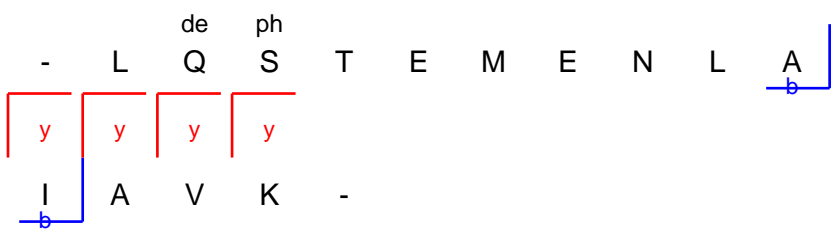

RO-QC-160121\_ZackD\_SS\_Set\_01\_Fraction 27206 FTMS; HC 57.58 682.85 DRAM2

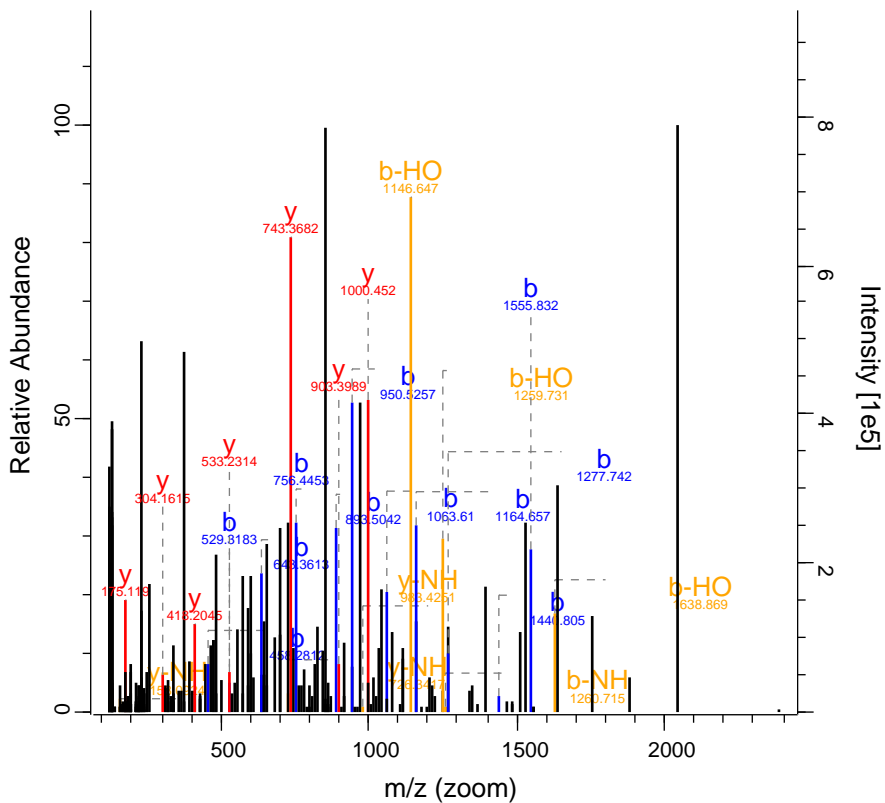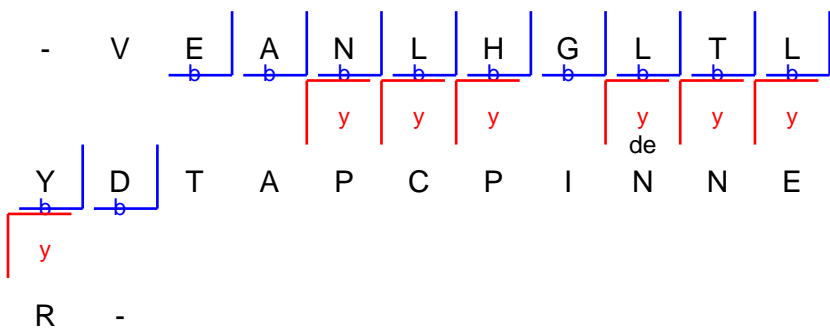

RO-QC-160121\_ZackD\_SS\_Set\_01\_Fractio 27308 FTMS; HC 116.24 612.69 PLA2G16

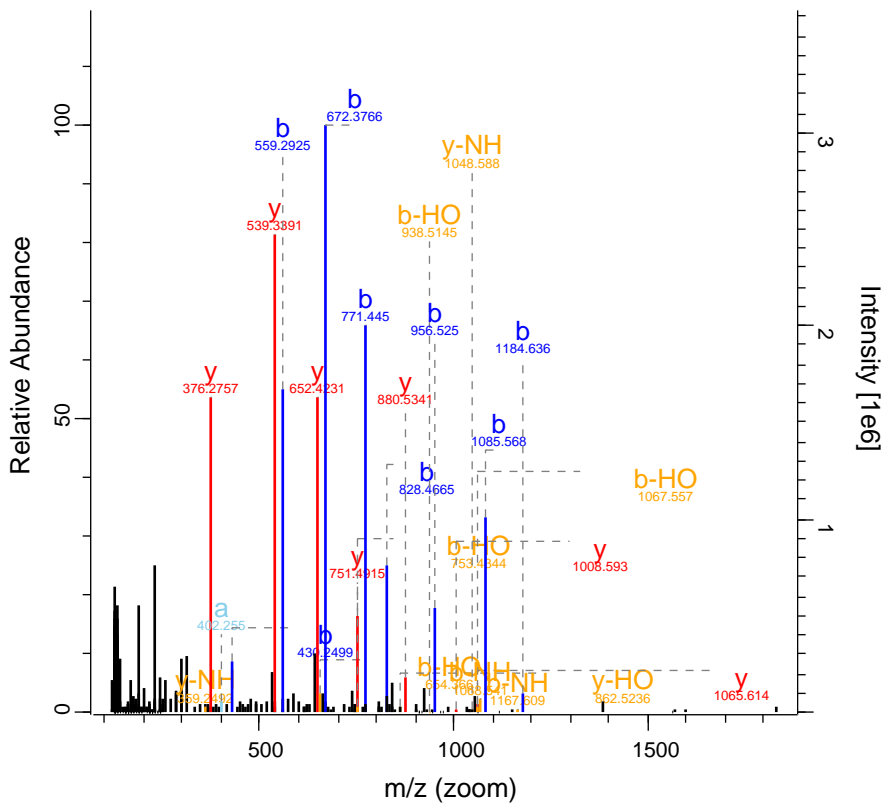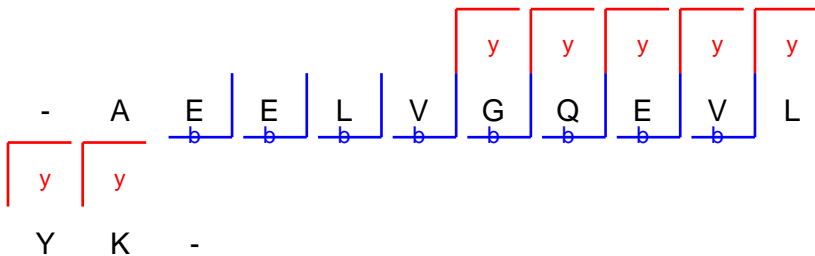

RO-QC-160121\_ZackD\_SS\_Set\_01\_Fraction 27487 FTMS; HC 92.87 984.05 BAP1

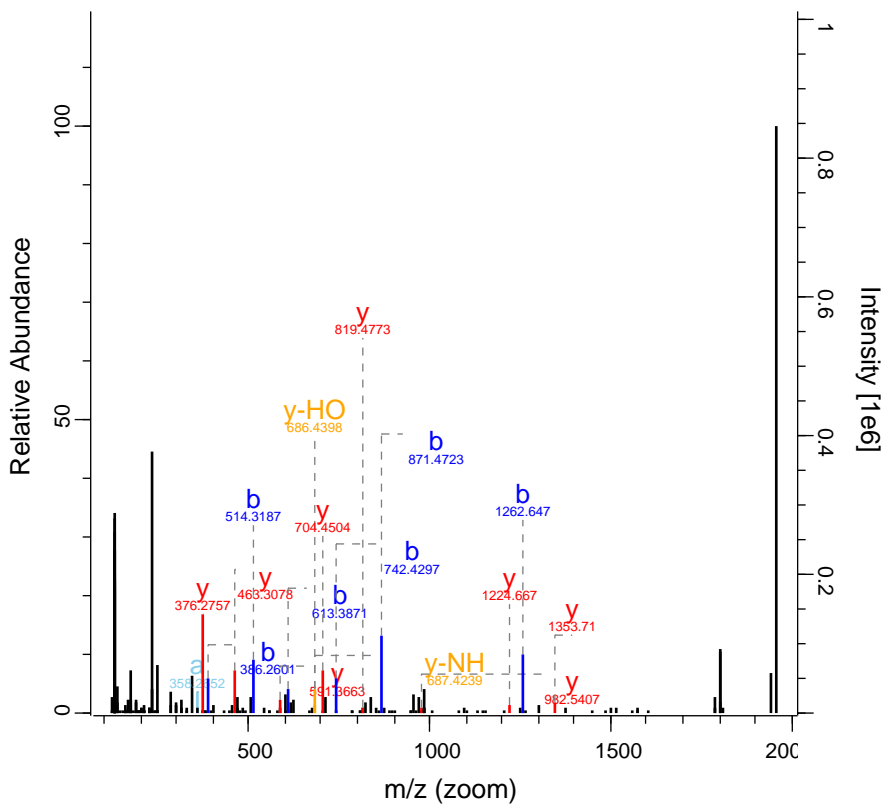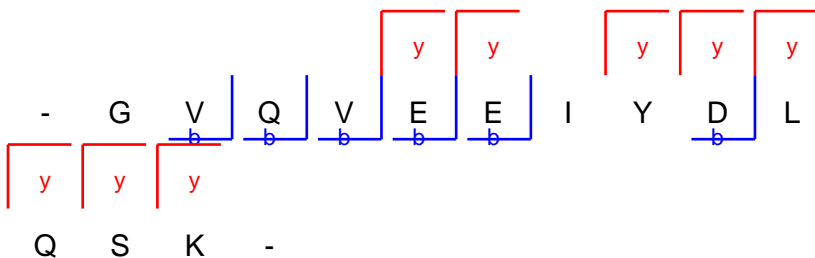

RO-QC-160121\_ZackD\_SS\_Set\_01\_Fraccio 28467 FTMS; HC 151.68 916.98 LOXL4

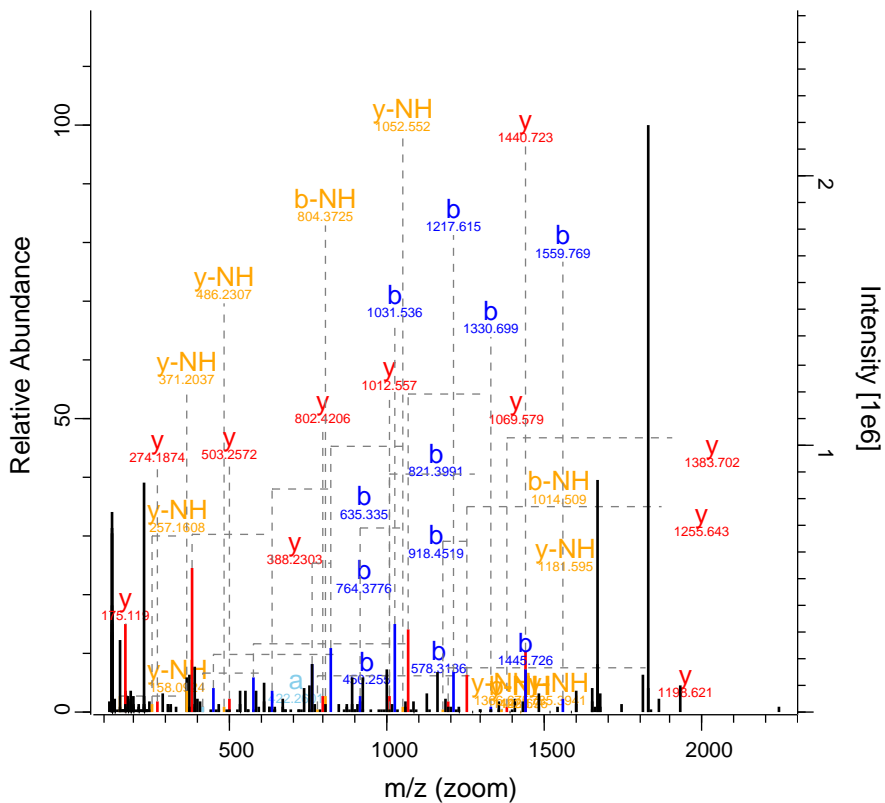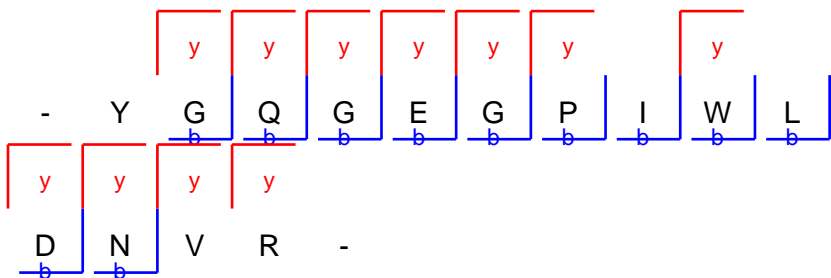

RO-QC-160121\_ZackD\_SS\_Set\_01\_Fraction 29253 FTMS; HC 93.21 863.48 FAU

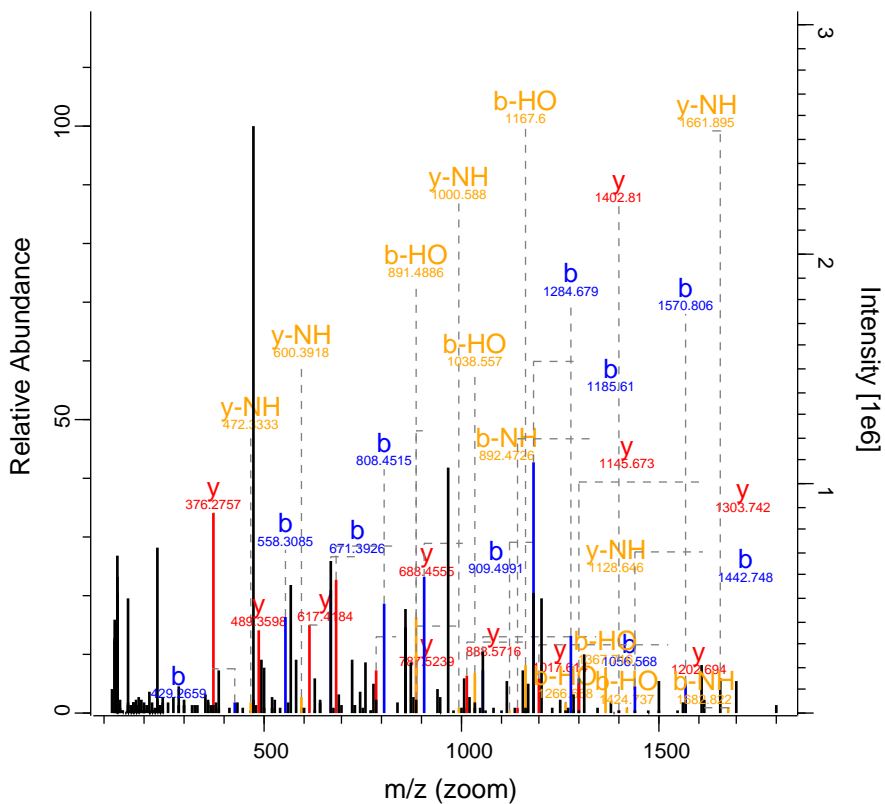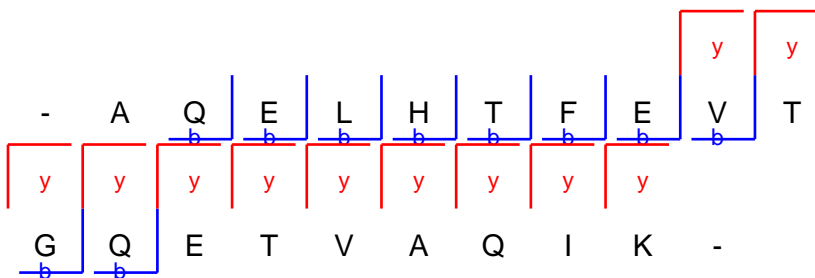

RO-QC-160121\_ZackD\_SS\_Set\_01\_Fraction 29268 FTMS; HC 87.16 647.86 FAU

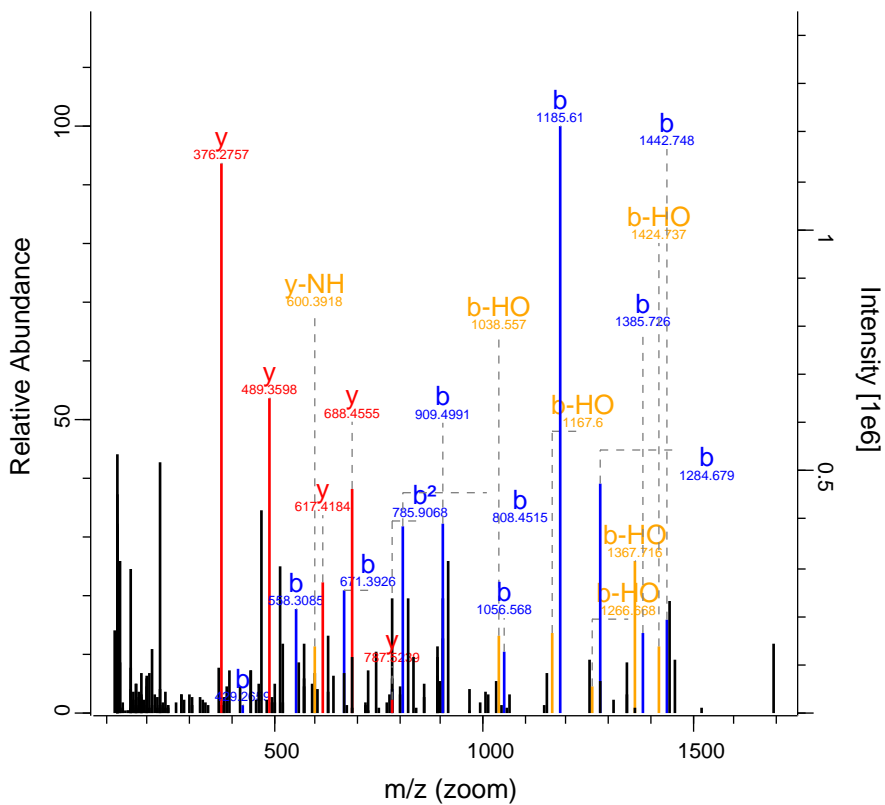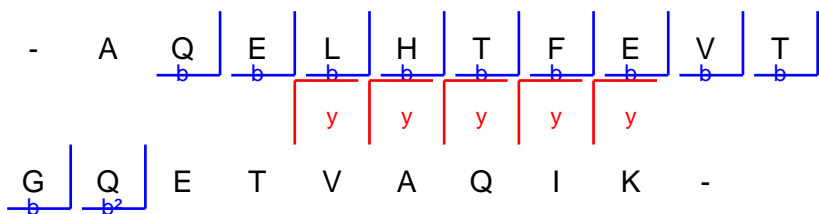

RO-QC-160121\_ZackD\_SS\_Set\_01\_Fraction 30116 FTMS; HC 69.92 678.04 SERPINF2

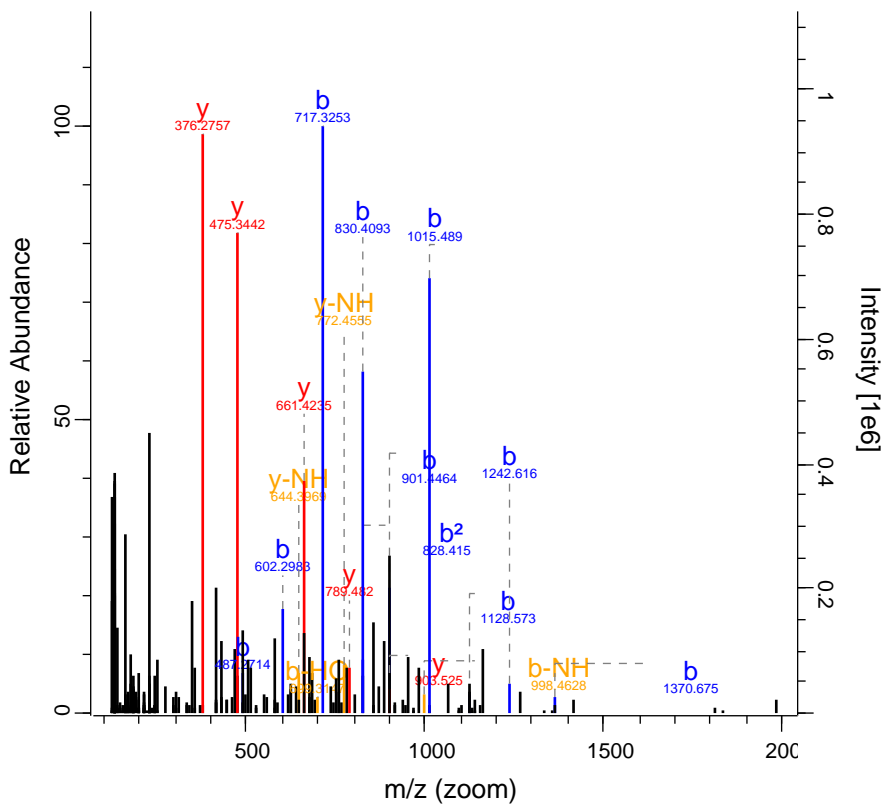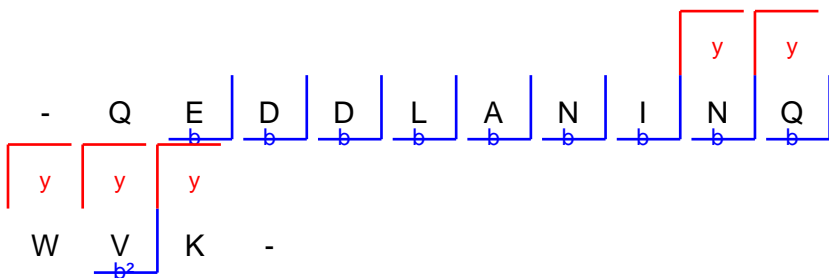



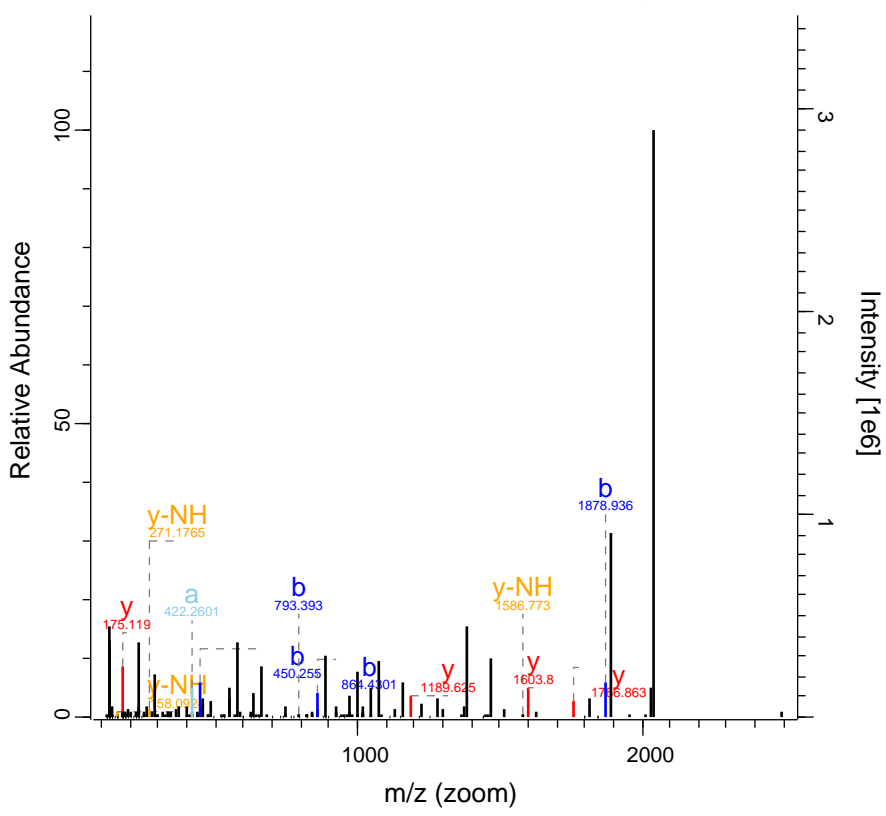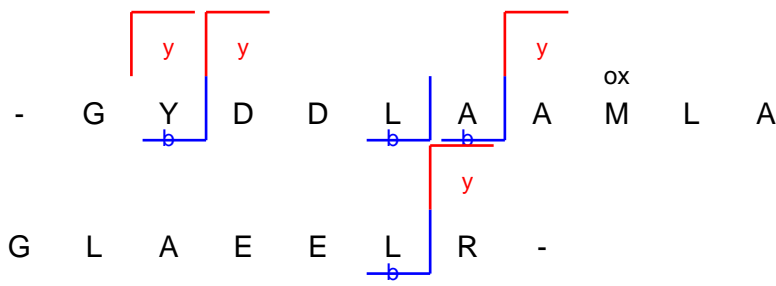

RO-QC-160121\_ZackD\_SS\_Set\_01\_Fractio 30592 FTMS; HC 113.47 744.37 GANC

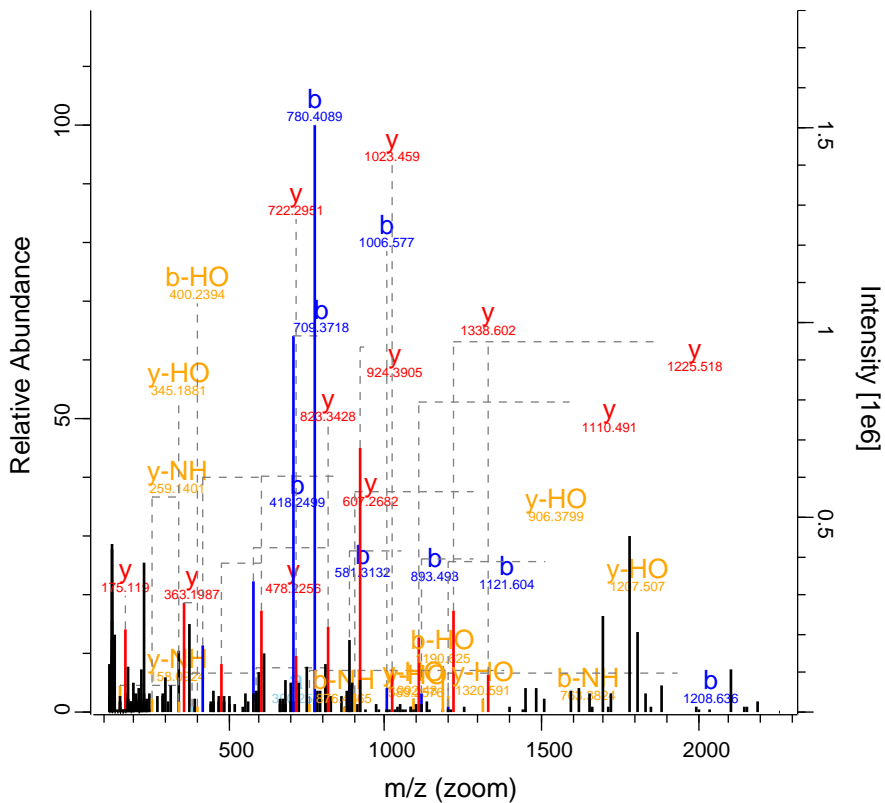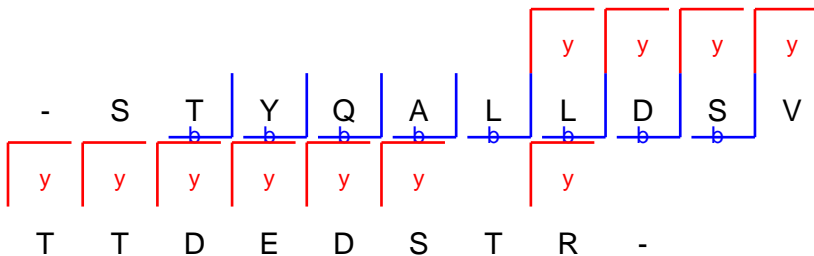

RO-QC-160121\_ZackD\_SS\_Set\_01\_Fraccio 30674 FTMS; HC 109.79 707.34 CLEC19A

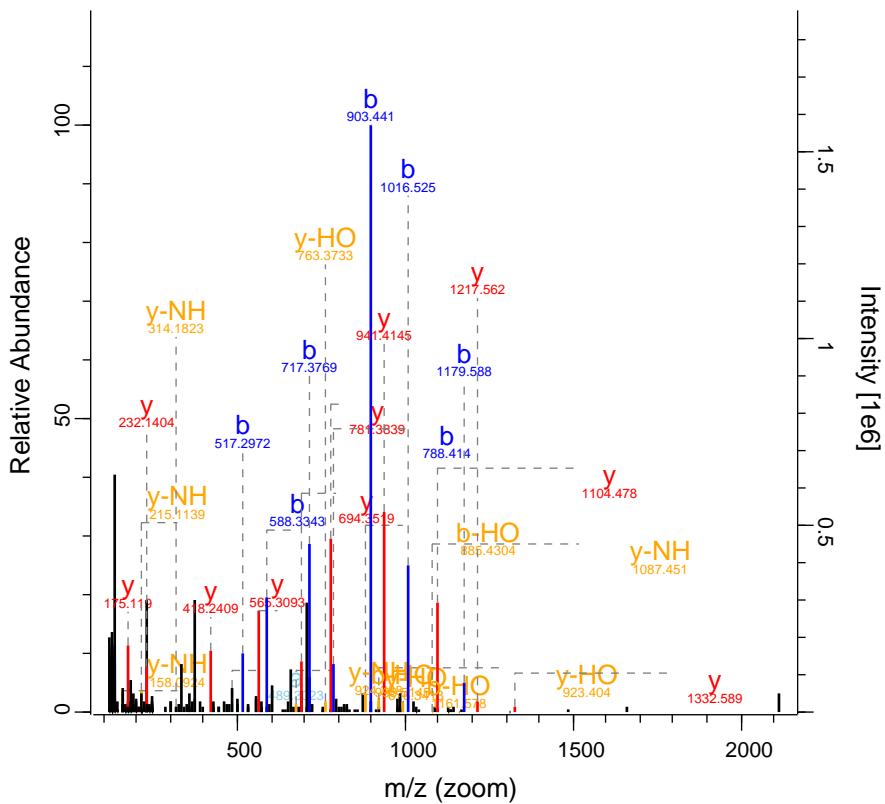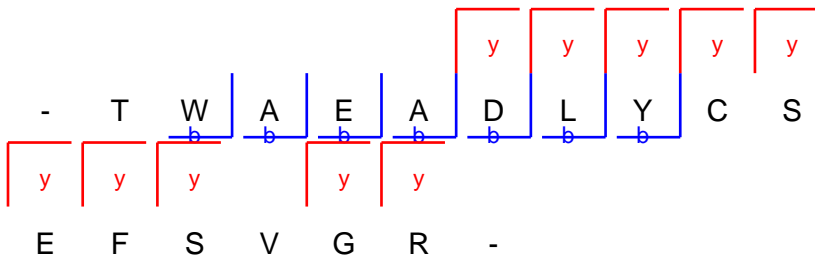

RO-QC-160121\_ZackD\_SS\_Set\_01\_Fractio 30701 FTMS; HC 131.13 626.69 TMEM184C

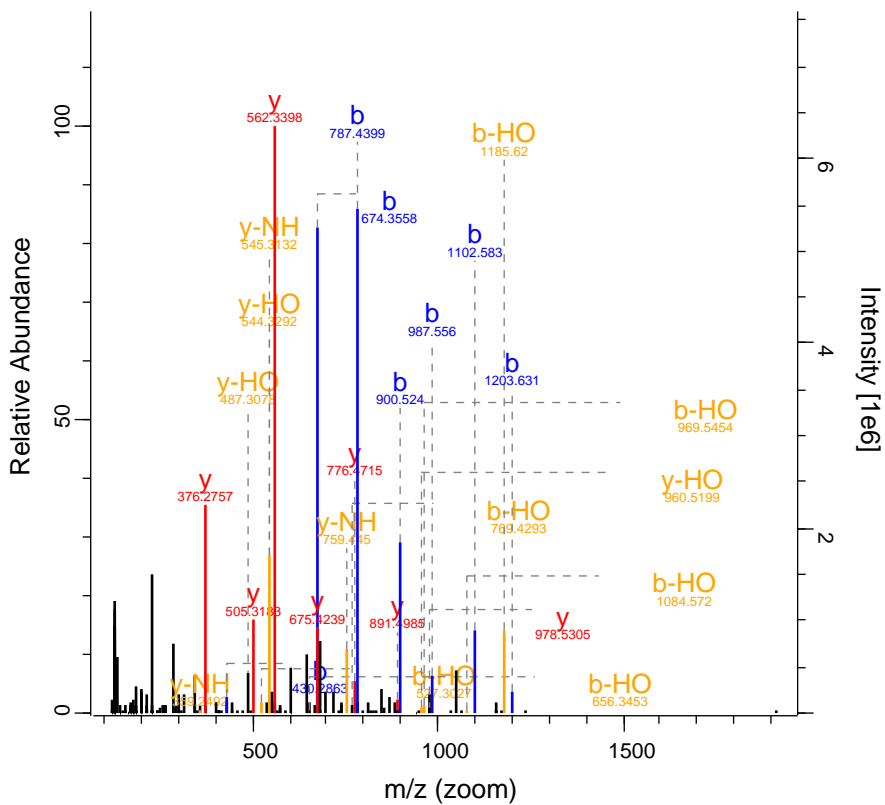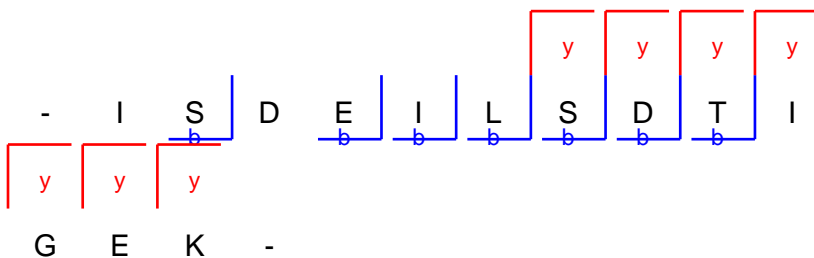

RO-QC-160121\_ZackD\_SS\_Set\_01\_Fractio 30719 FTMS; HC 112.13 940.03 TMEM184C

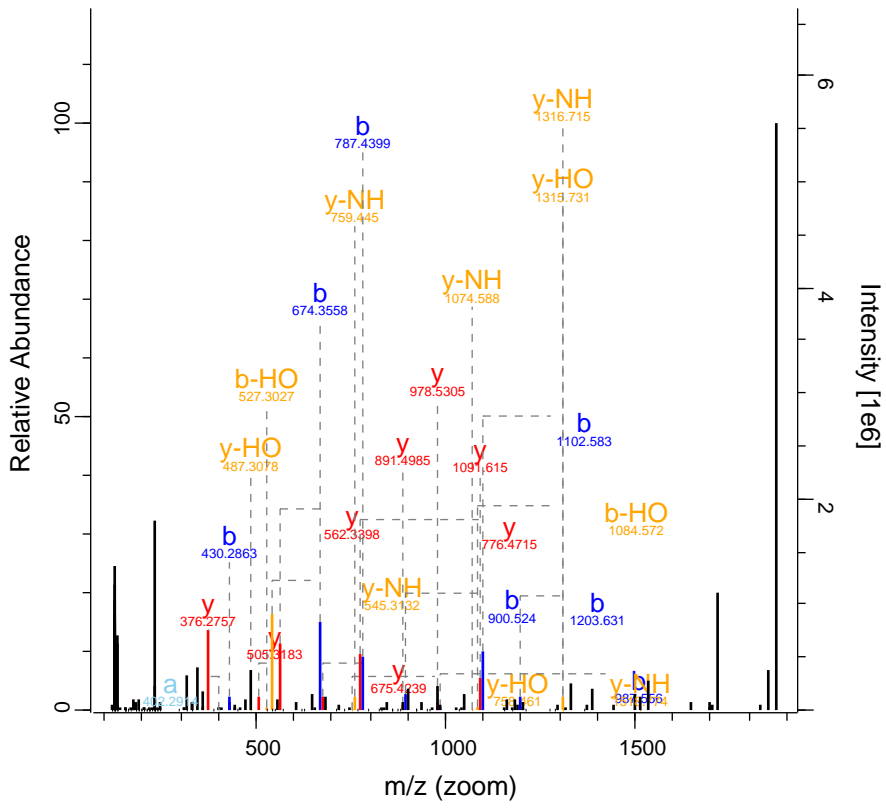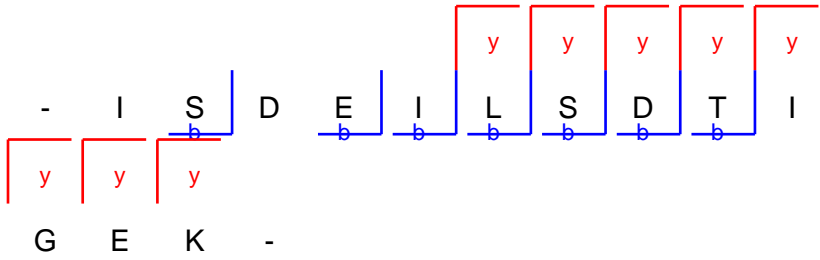

RO-QC-160121\_ZackD\_SS\_Set\_01\_Fractio 30874 FTMS; HC 118.76 626.69 TMEM184C

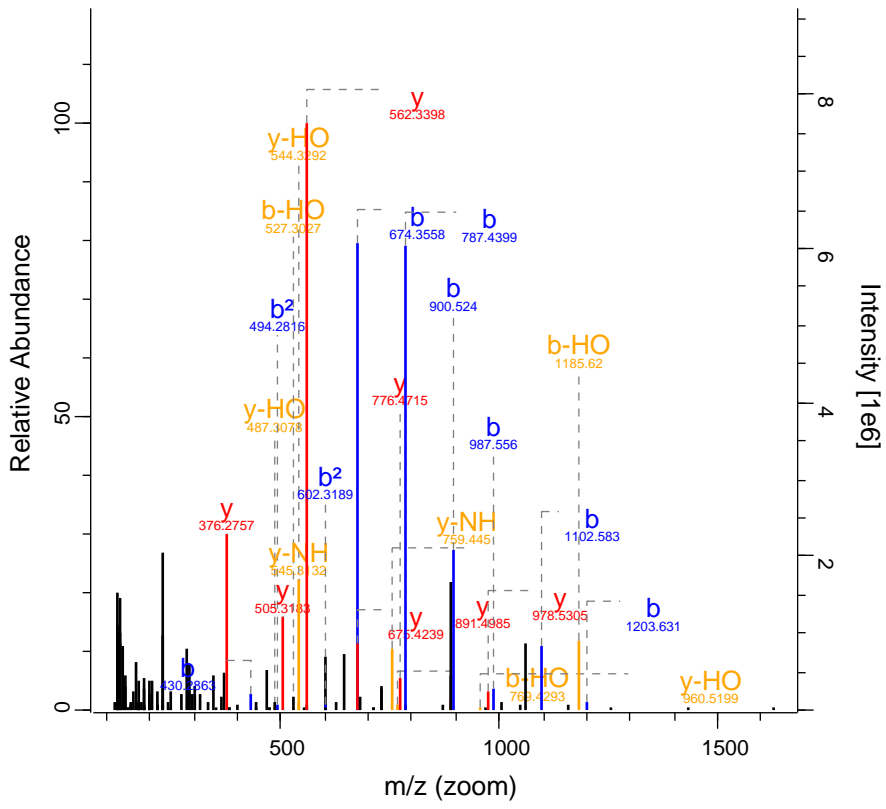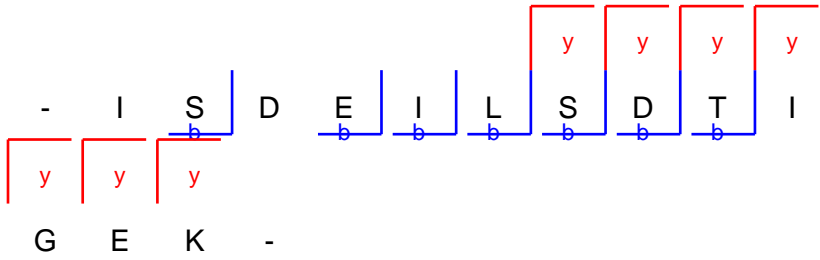

RO-QC-160121\_ZackD\_SS\_Set\_01\_Fractio 30919 FTMS; HC 144.57 939.53 TMEM184C

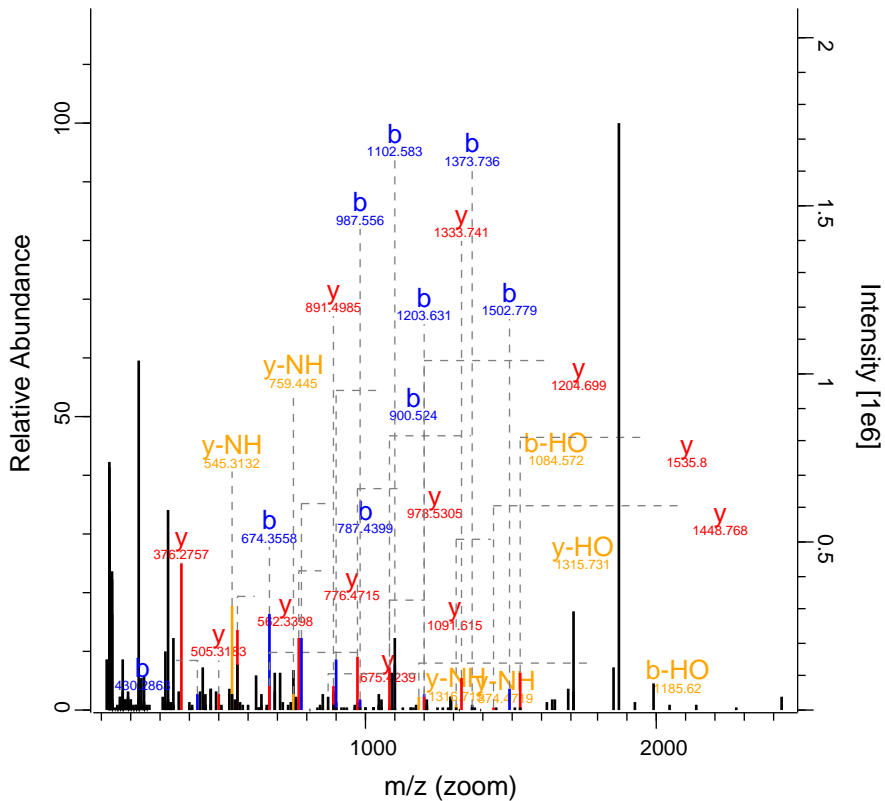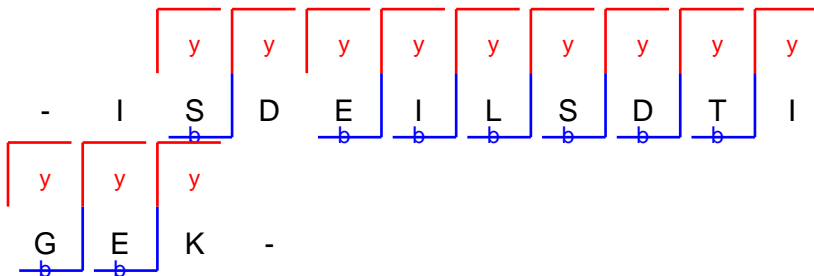

RO-QC-160121\_ZackD\_SS\_Set\_01\_Fraction 31423 FTMS; HC 98.69 740.73 SMYD2

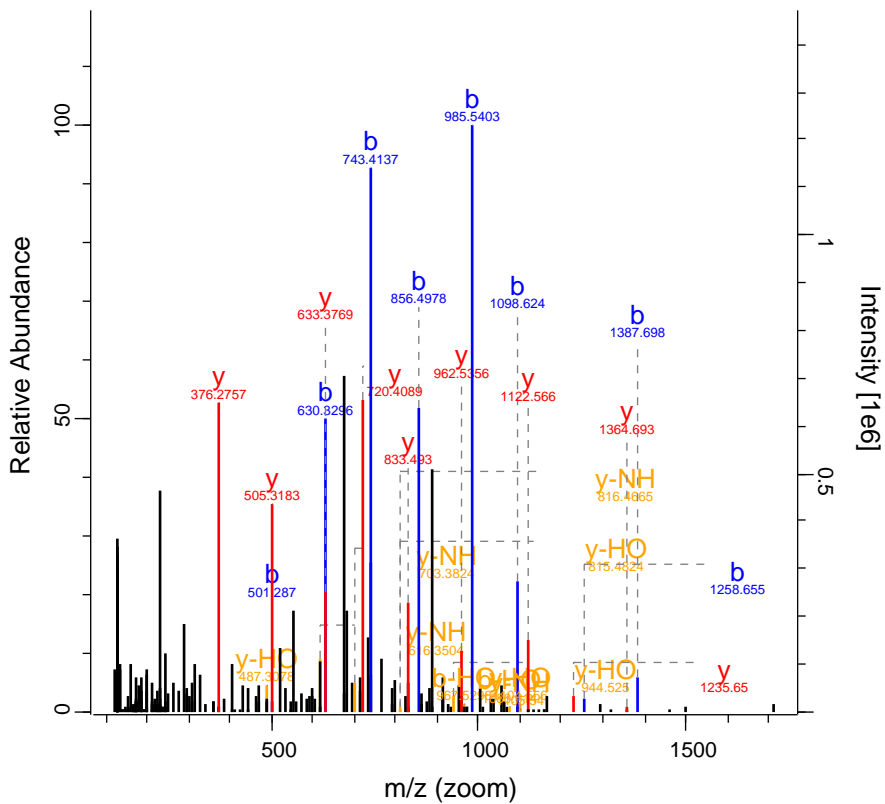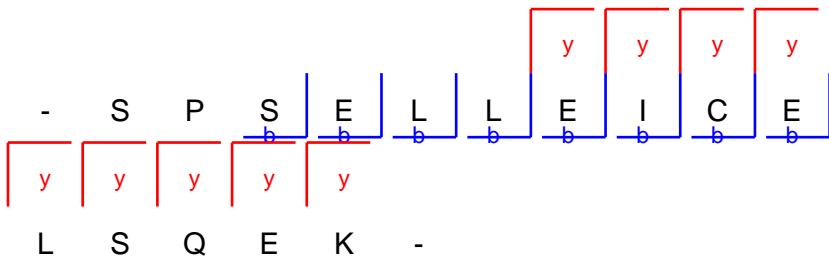



RO-QC-160121\_ZackD\_SS\_Set\_01\_Fractio 31568 FTMS; HC 151.56 765.08 SCLT1

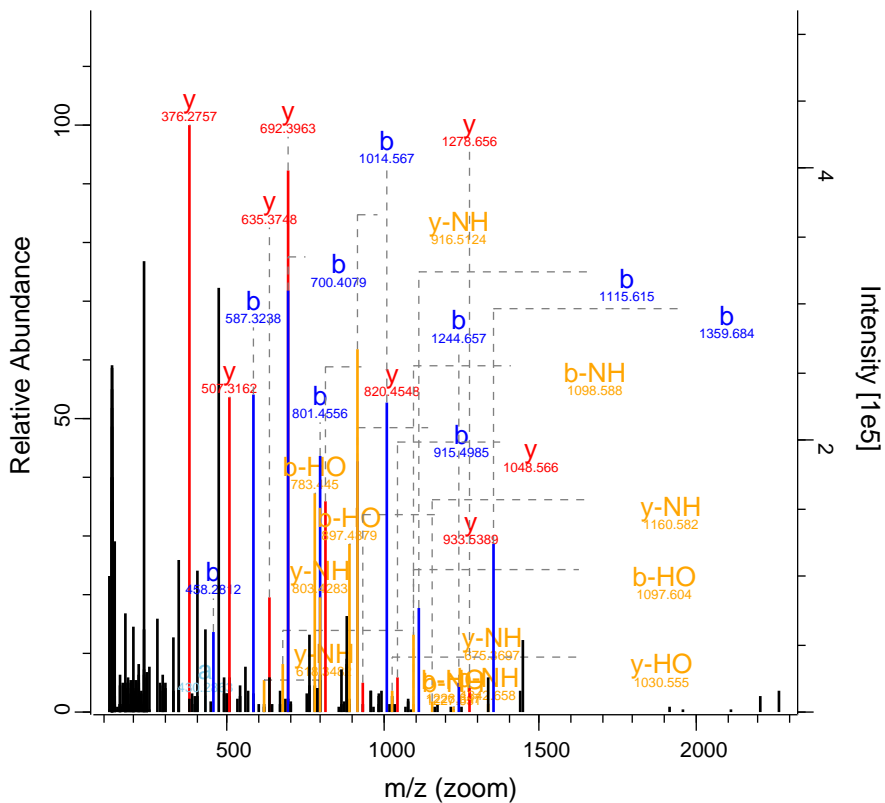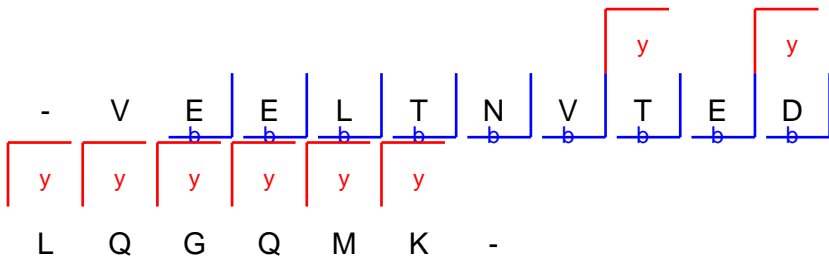

RO-QC-160121\_ZackD\_SS\_Set\_01\_Fraction 32160 FTMS; HC 138.99 881.95 R3HDM4

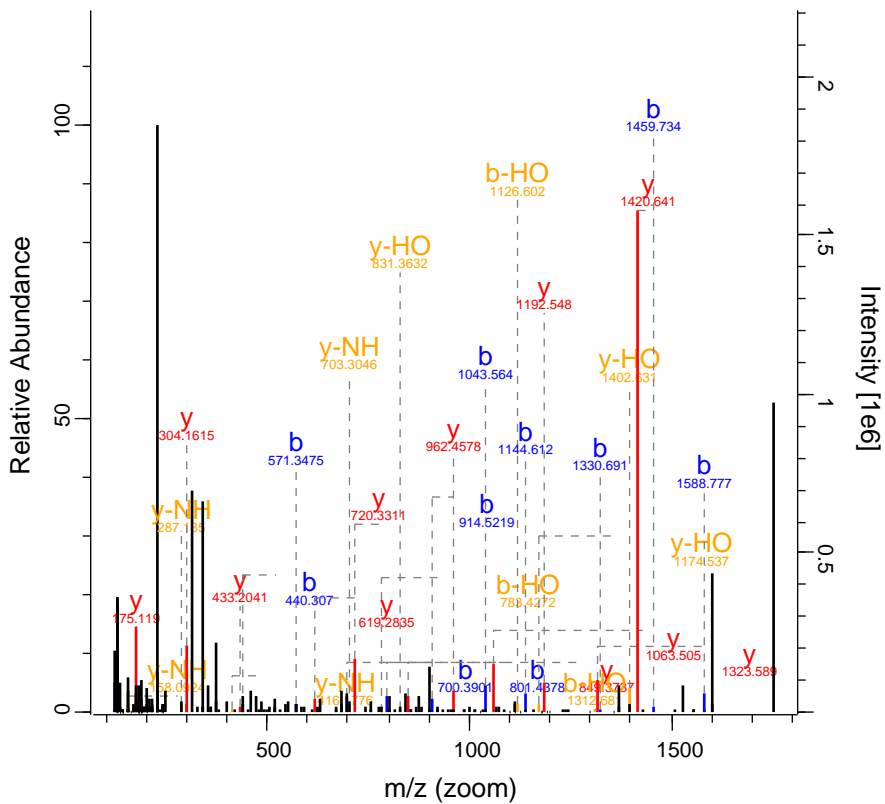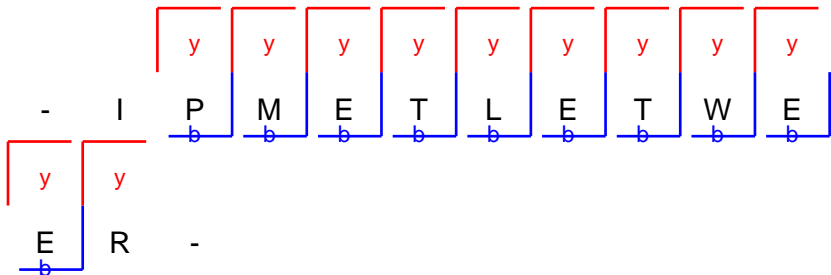

RO-QC-160121\_ZackD\_SS\_Set\_01\_Fraction 32526 FTMS; HC 78.69 761.35 VCPKMT

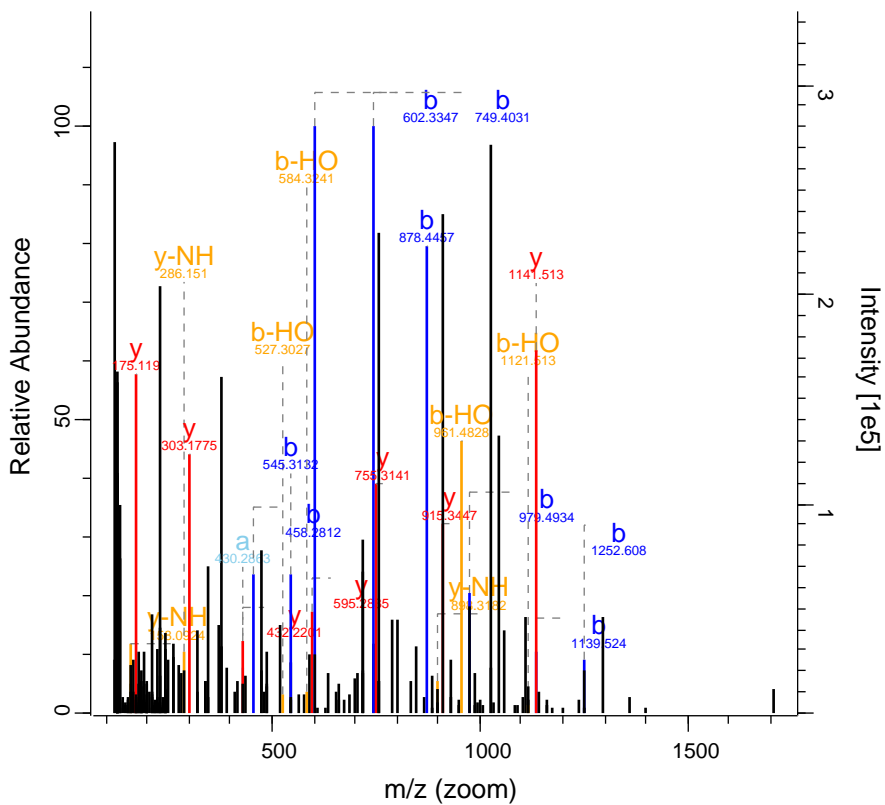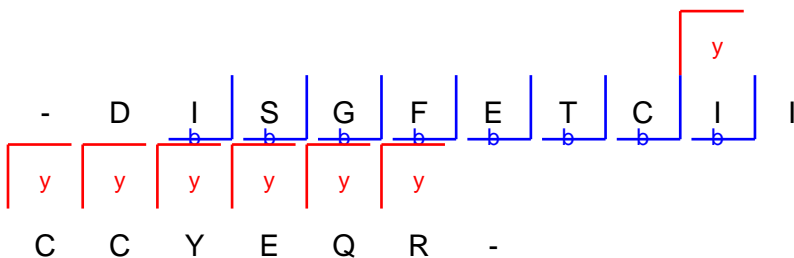

RO-QC-160121\_ZackD\_SS\_Set\_01\_Fraction1 32786 FTMS; HCl 130.24 679.7 CCDC61

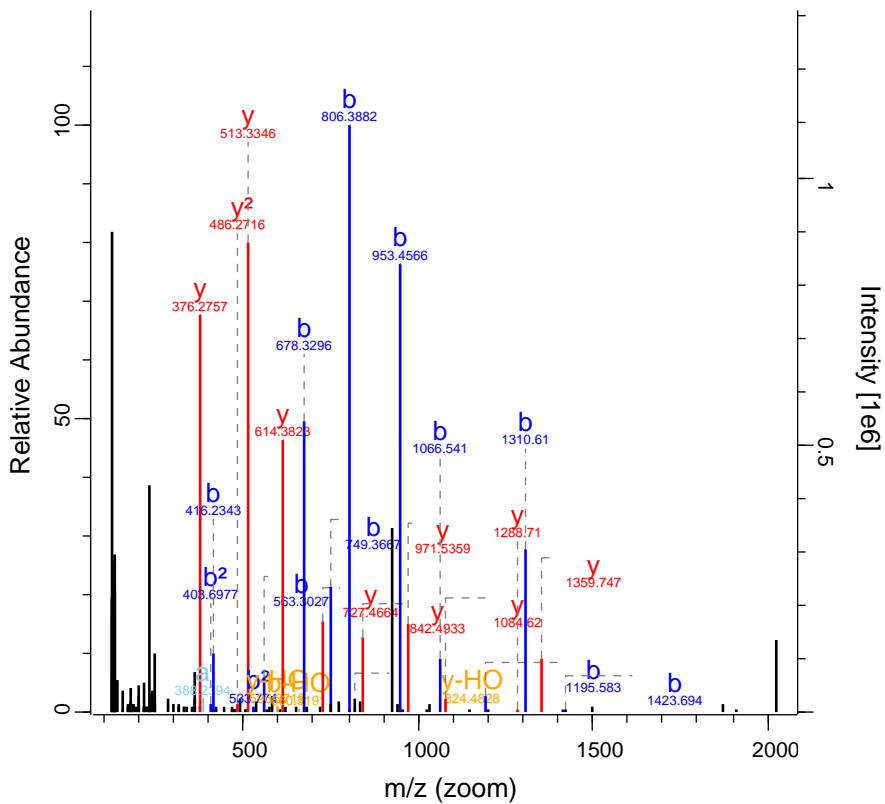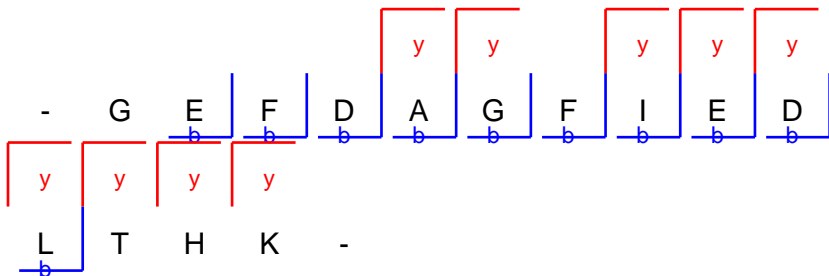

RO-QC-160121\_ZackD\_SS\_Set\_01\_Fraction 33301 FTMS; HC 77.02 810.42 RGMA

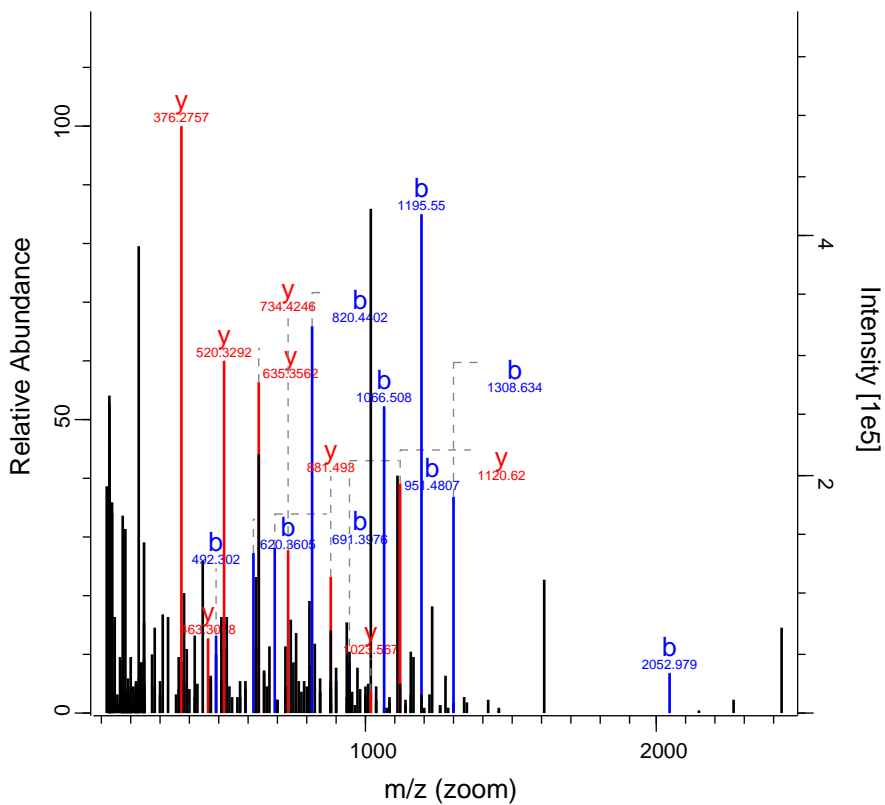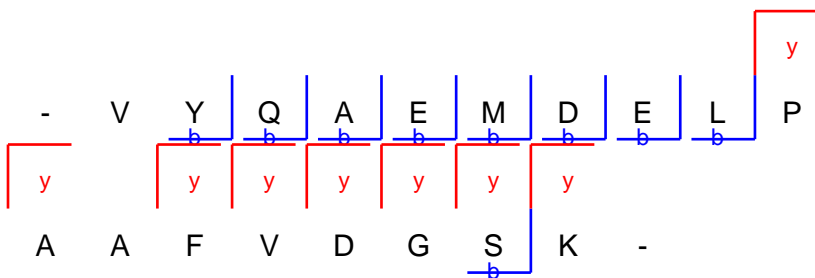

RO-QC-160121\_ZackD\_SS\_Set\_01\_Fractio 33488 FTMS; HC 161.48 952.52 NRSN2

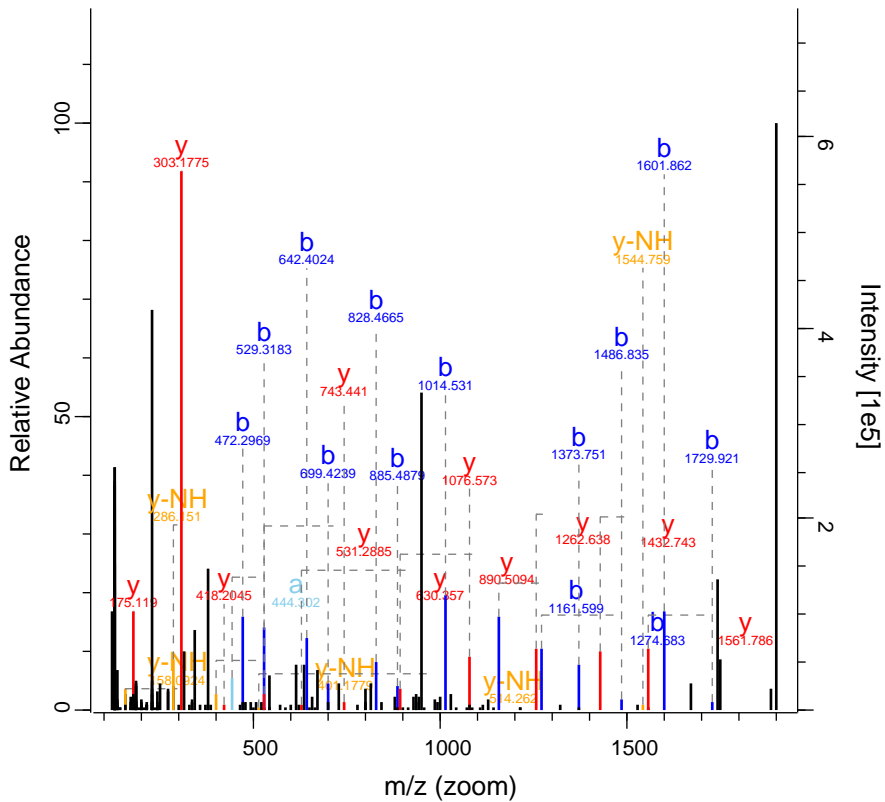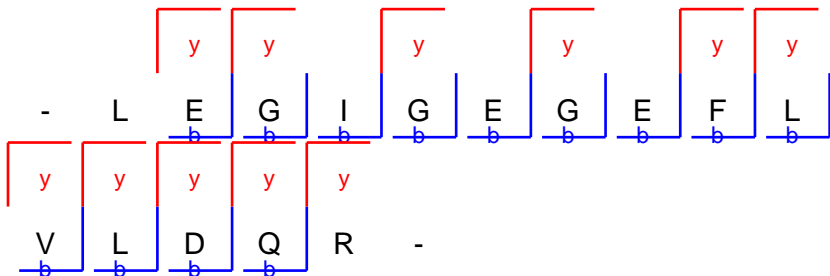

RO-QC-160121\_ZackD\_SS\_Set\_01\_Fractic 33876 FTMS; HC 76.29 1037.86 SFT2D1

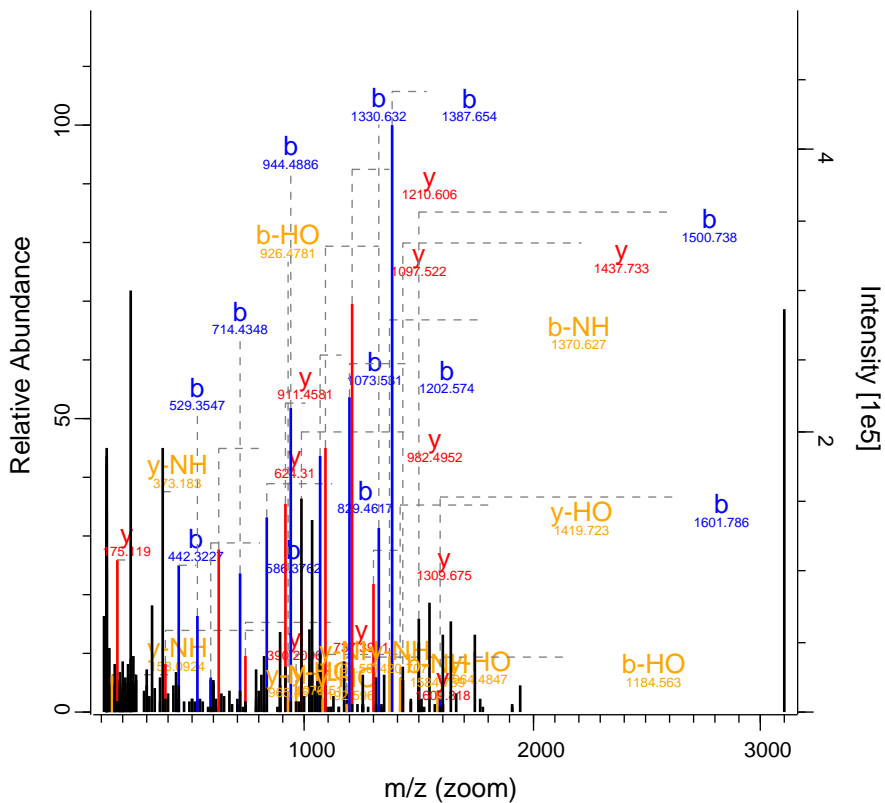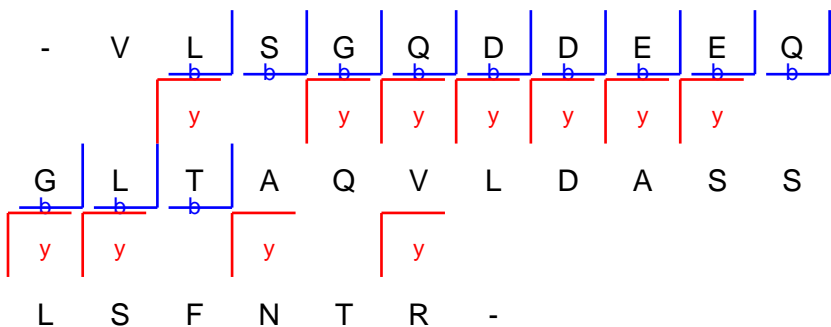

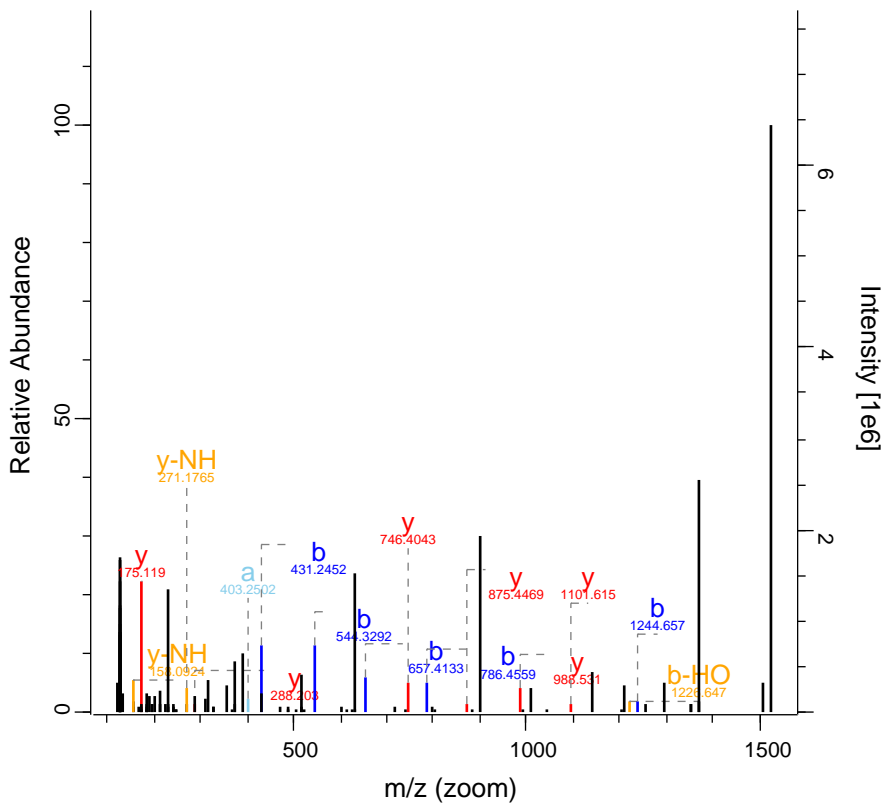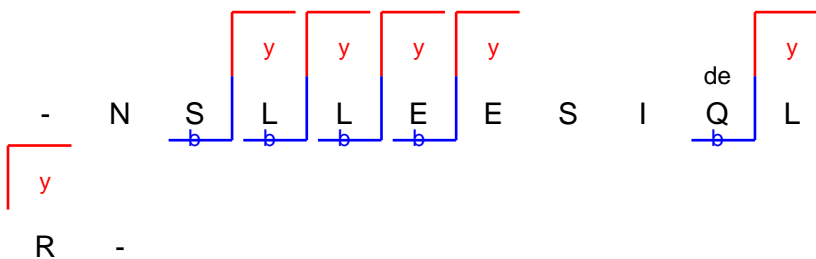







RO-QC-160121\_ZackD\_SS\_Set\_01\_Fraction 4789 FTMS; HCl 94.69 443.76 C16orf87

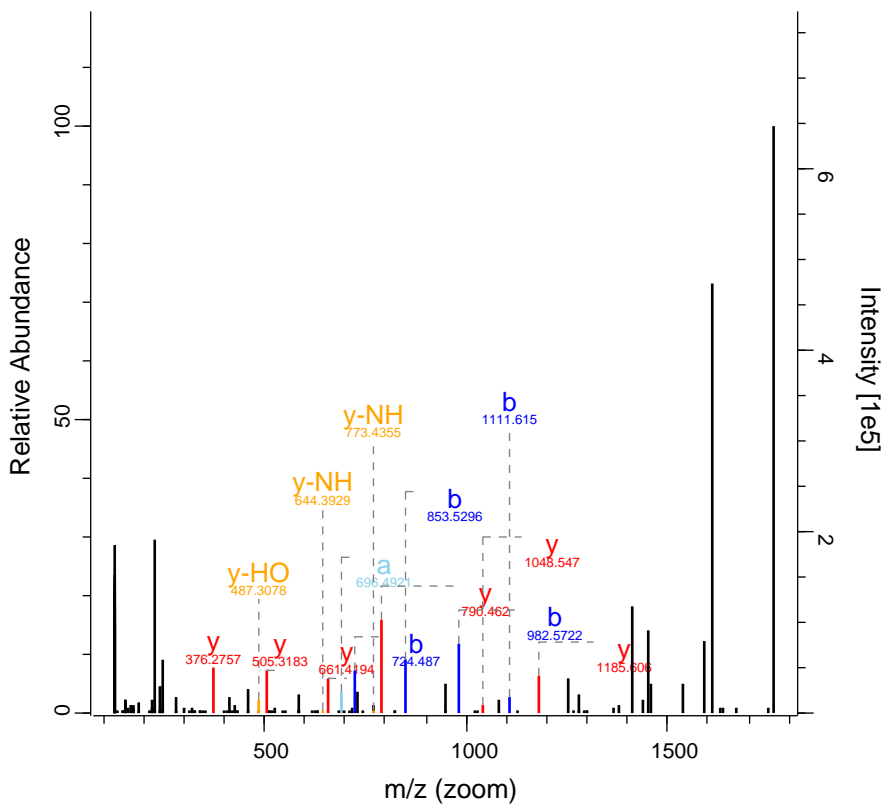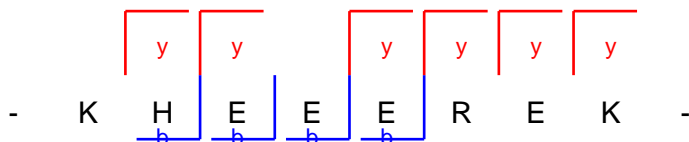

RO-QC-160121\_ZackD\_SS\_Set\_01\_Fraction 4795 FTMS; HC 166.33 355.21 C16orf87

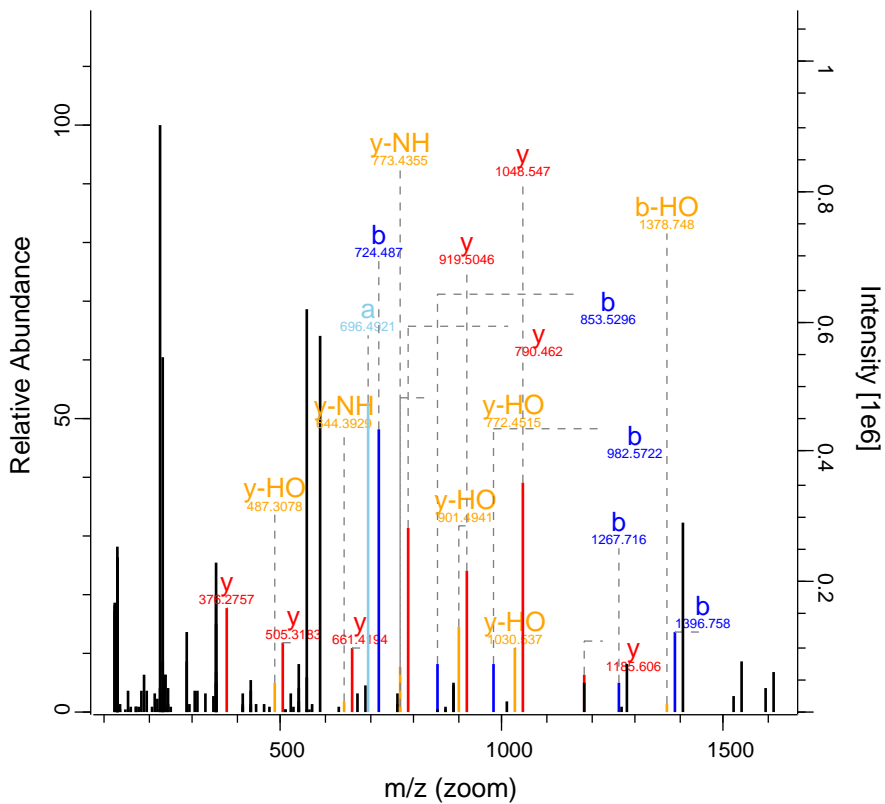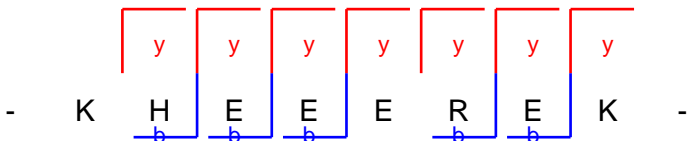

RO-QC-160121\_ZackD\_SS\_Set\_01\_Fraction 5154 FTMS; HCl 69.82 515.24 DOT1L

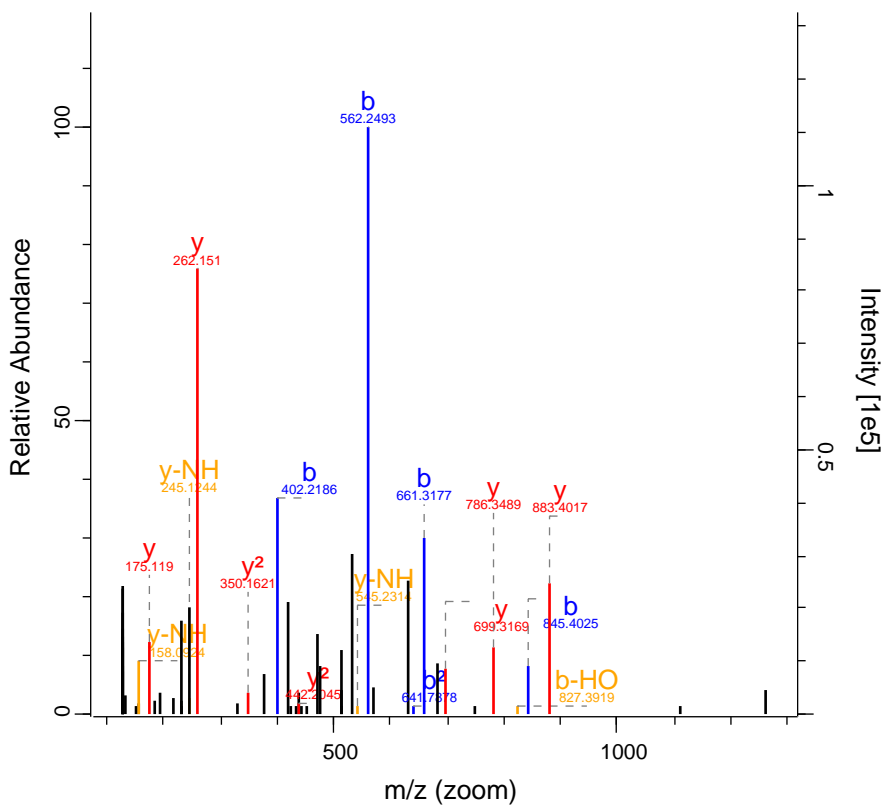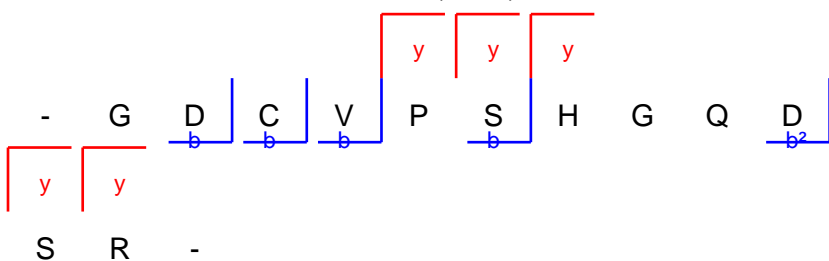

S R -

RO-QC-160121\_ZackD\_SS\_Set\_01\_Fraction 5482 FTMS; HCl 41.54 520.91 GREM1

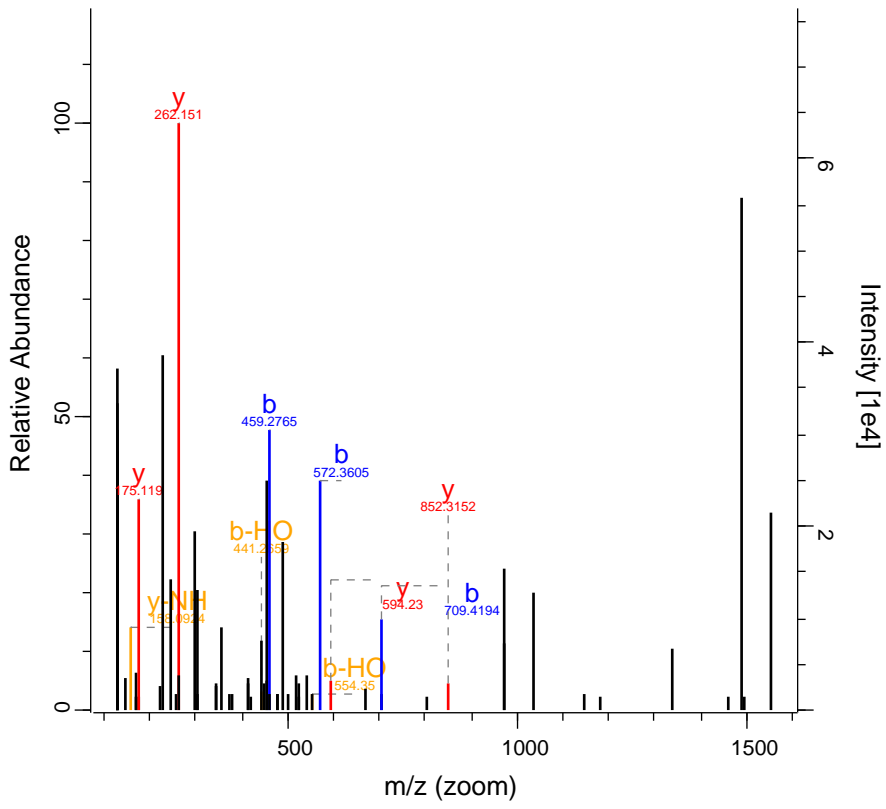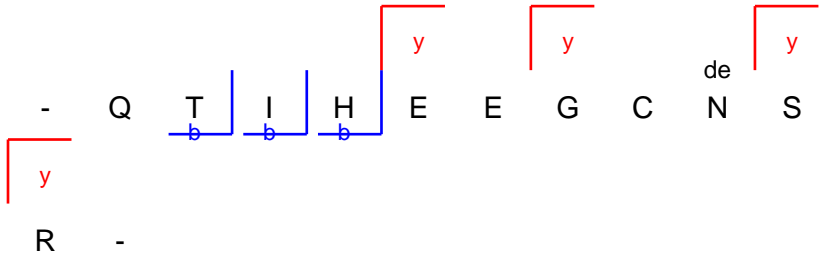

R -

RO-QC-160121\_ZackD\_SS\_Set\_01\_Fraction 5667 FTMS; HC 127.76 640.99 RUNDC1

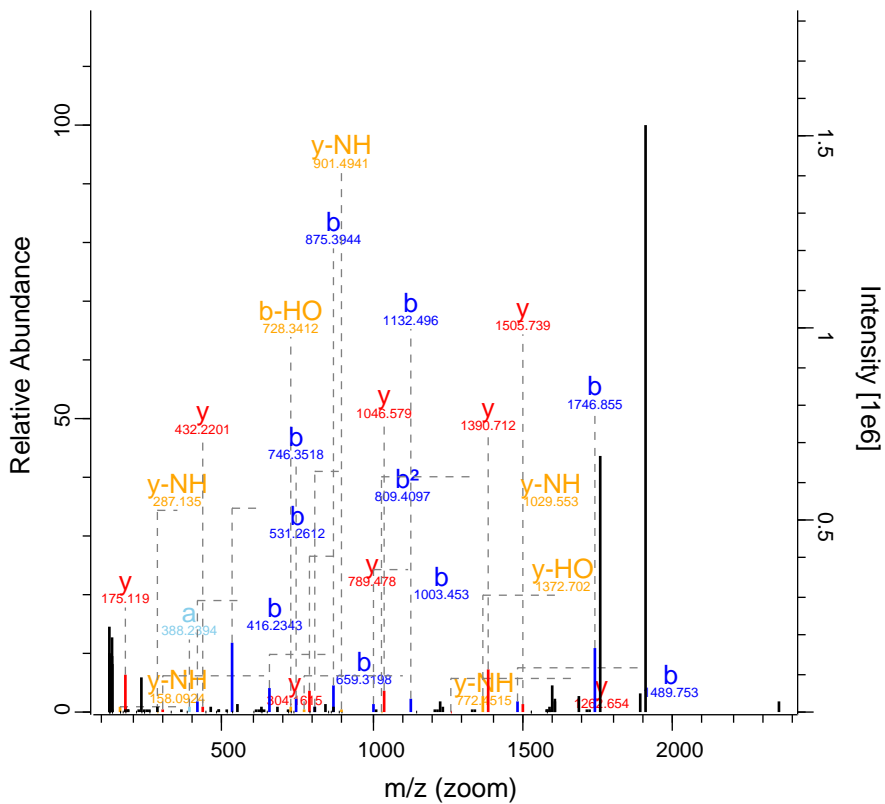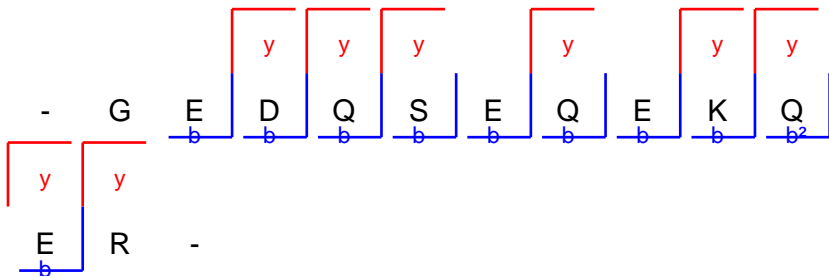

RO-QC-160121\_ZackD\_SS\_Set\_01\_Frac1 5682 FTMS; HC 88.73 643.68 ARHGEF35;ARHGAP

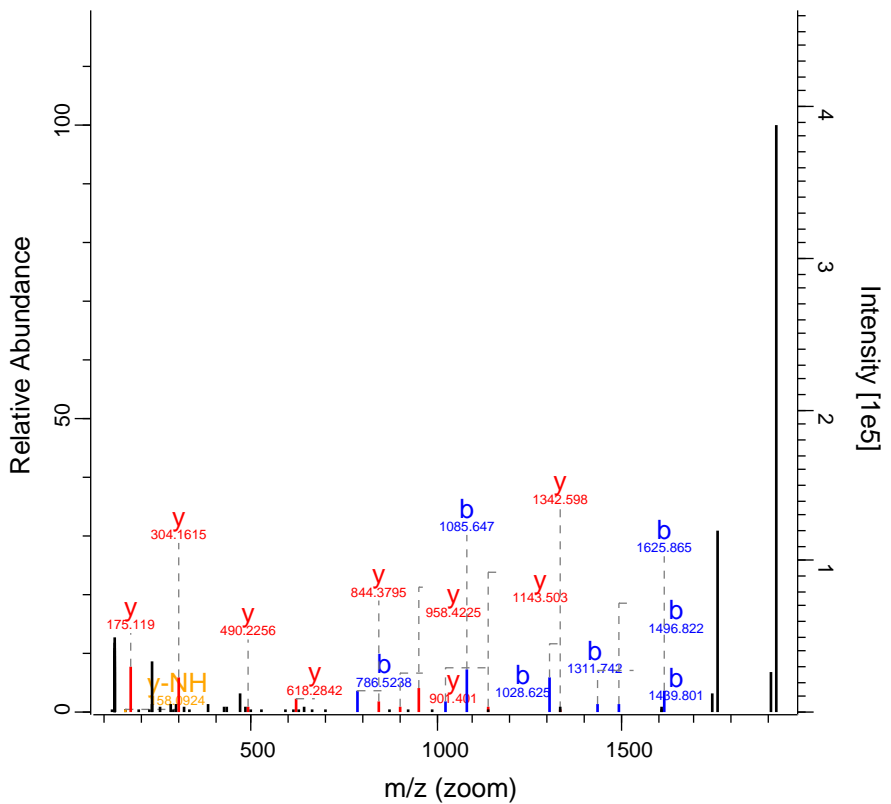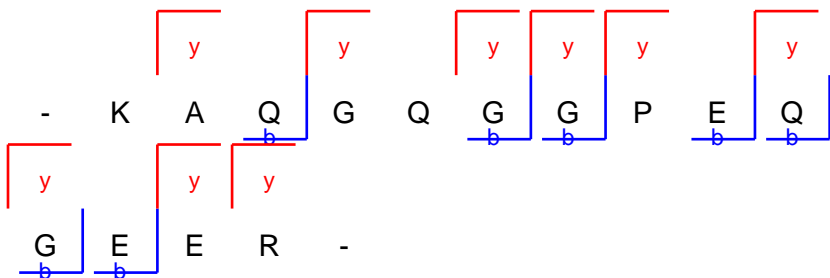



RO-QC-160121\_ZackD\_SS\_Set\_01\_Fraction 5750 FTMS; HCl 77.53 573.65 FAM110C

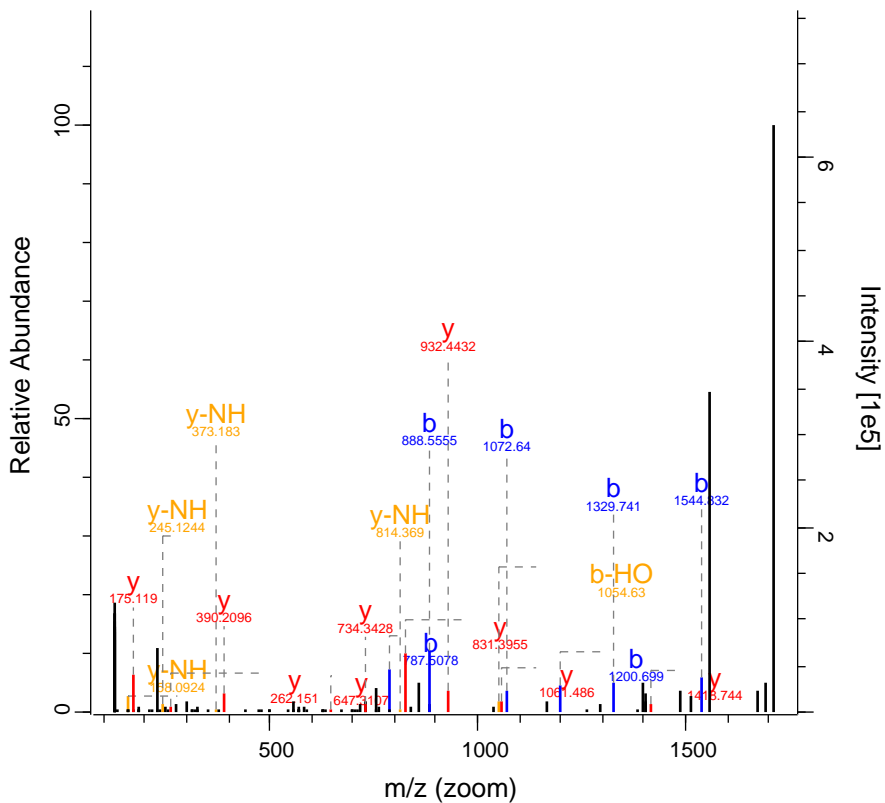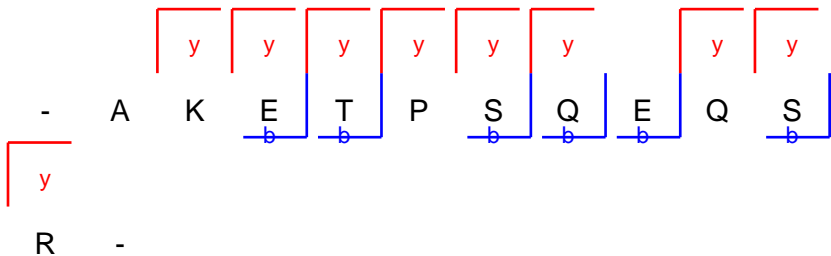

R

RO-QC-160121\_ZackD\_SS\_Set\_01\_Fraction 5879 FTMS; HCl 92.84 669.83 TMEM47

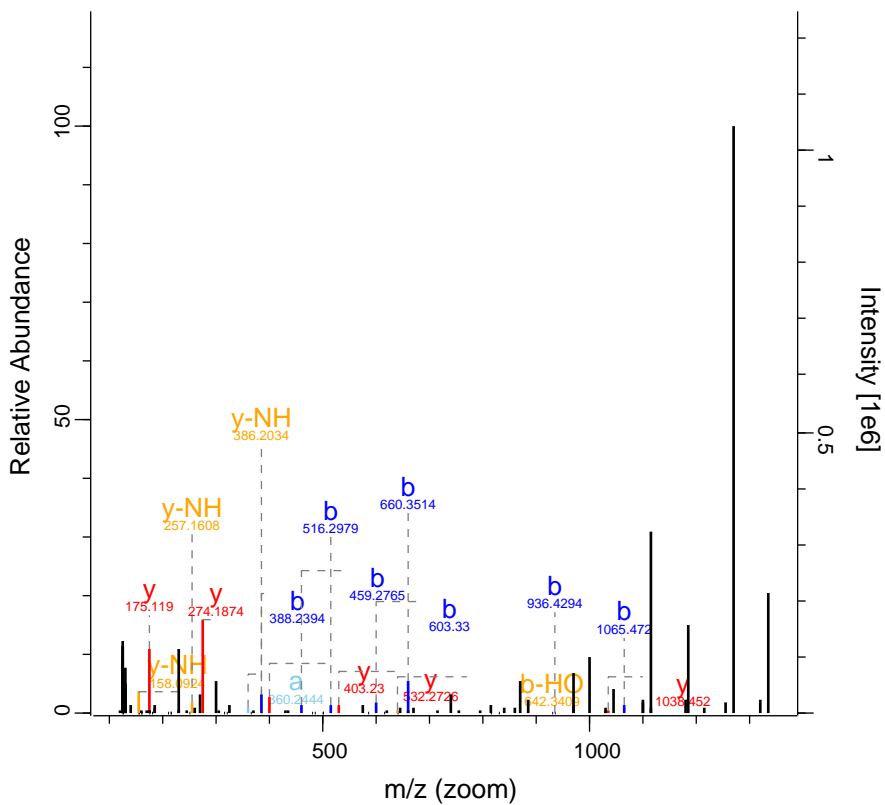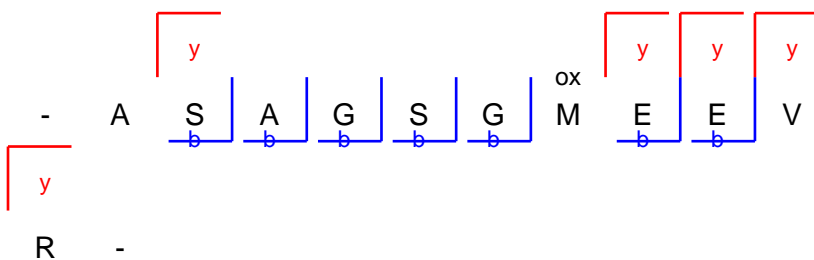

RO-QC-160121\_ZackD\_SS\_Set\_01\_Fraction 6018 FTMS; HC 170.89 690.35 SLC2A12

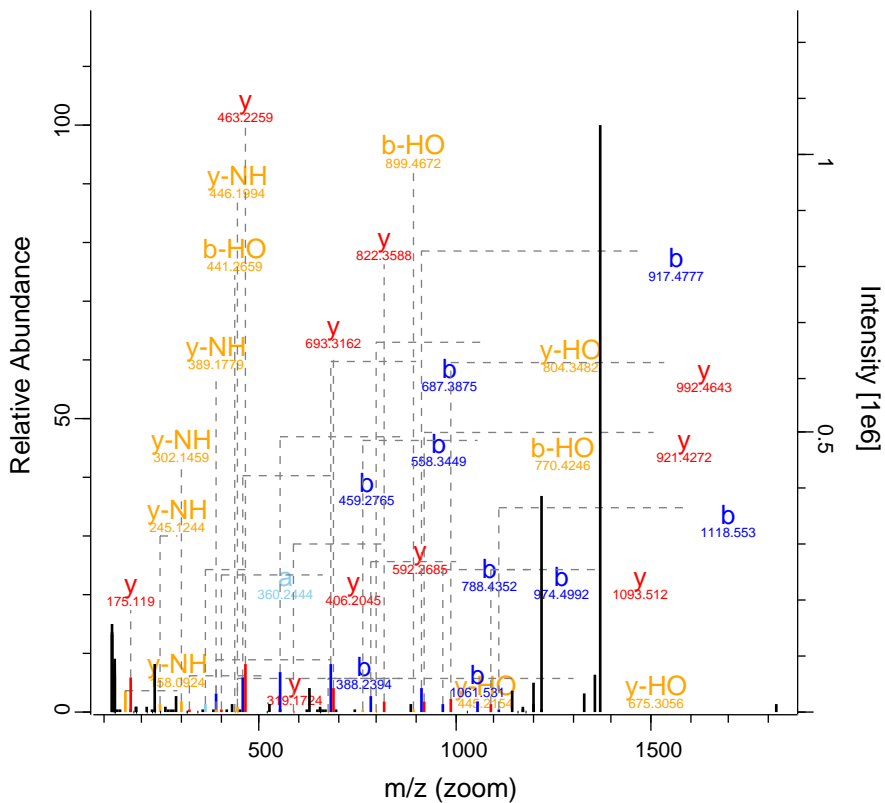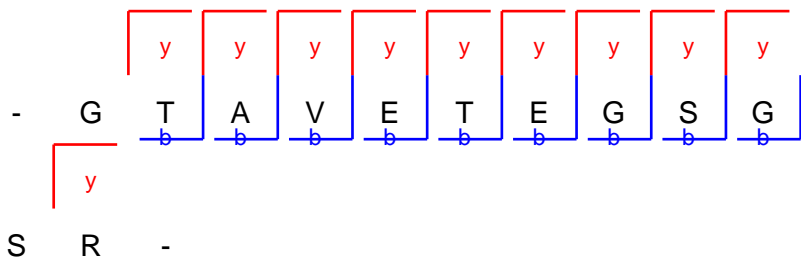

S R -



RO-QC-160121\_ZackD\_SS\_Set\_01\_Fraction 6154 FTMS; HCl 76.84 755.85 RCN3

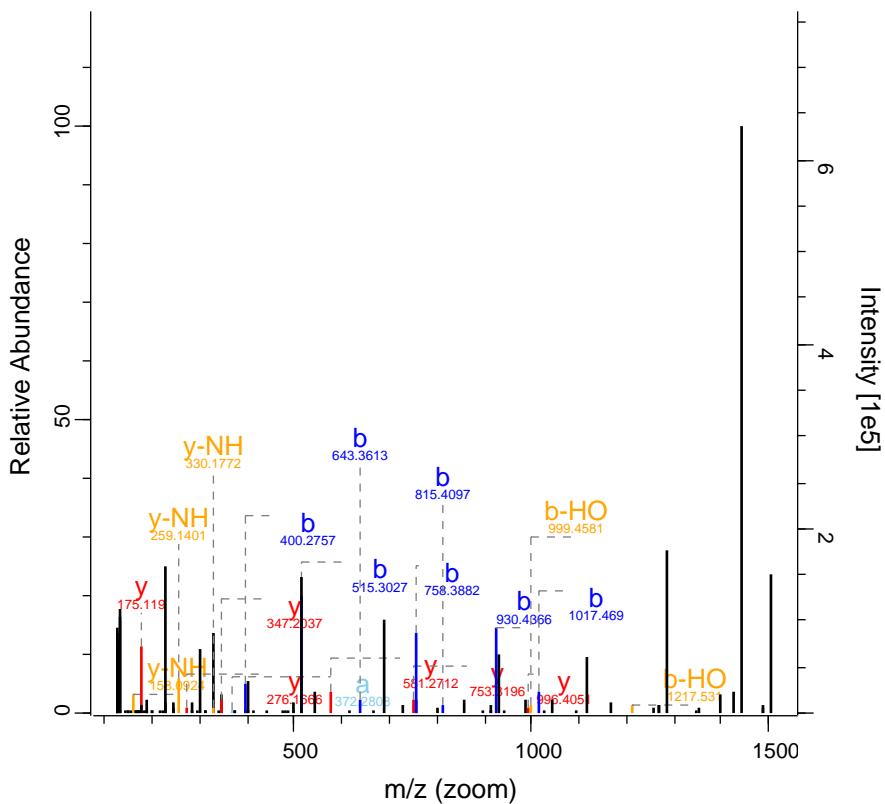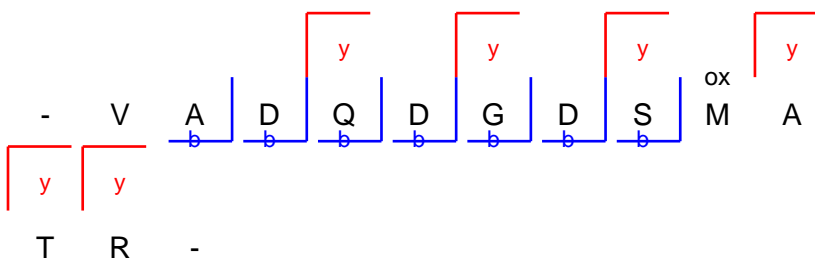

T R -

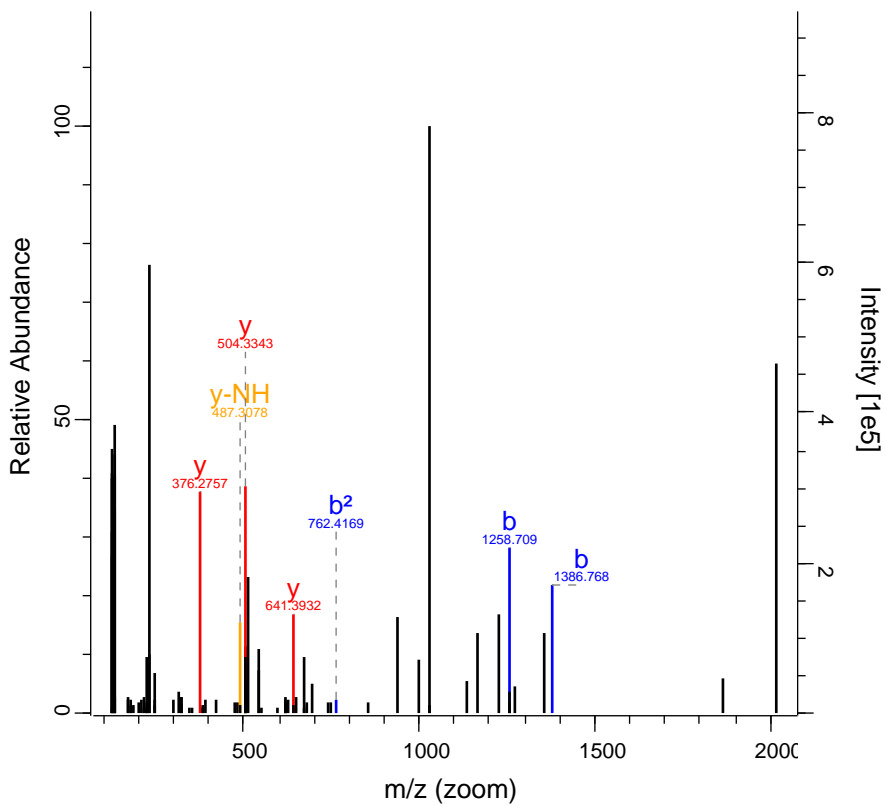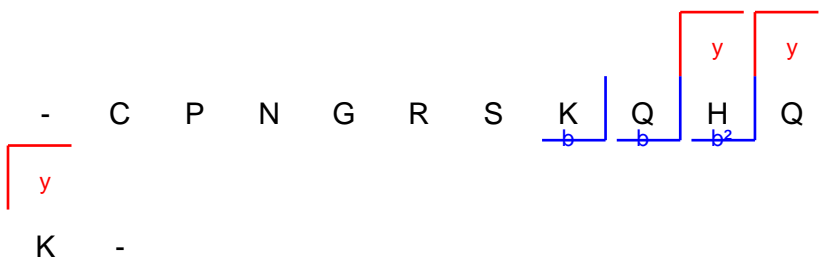

RO-QC-160121\_ZackD\_SS\_Set\_01\_Fraction 6423 FTMS; HC 191.45 649.85 CD99

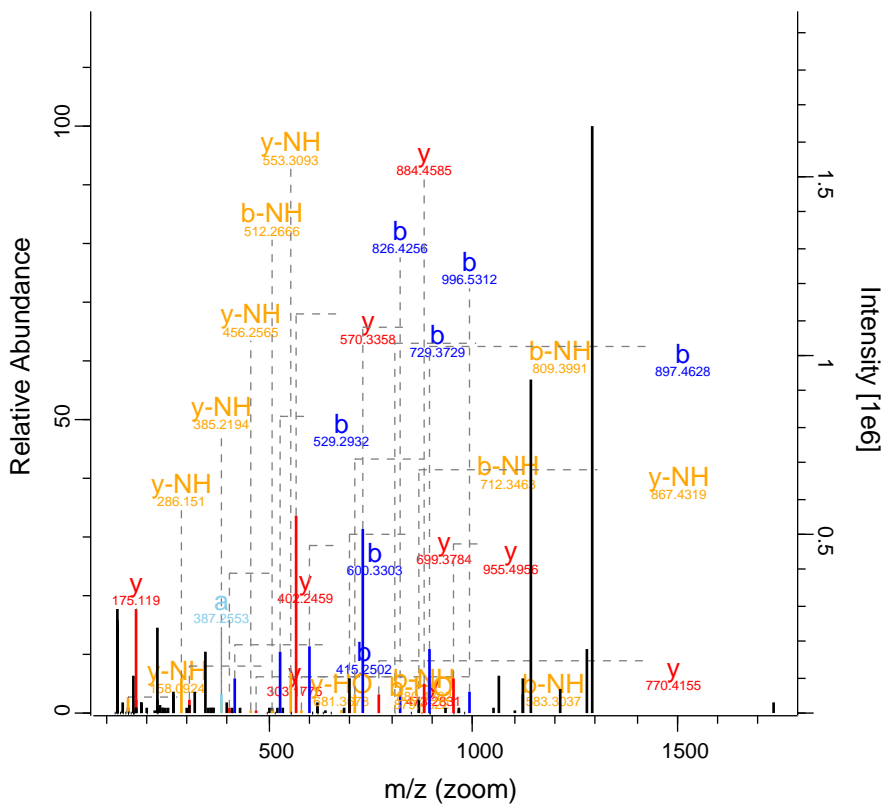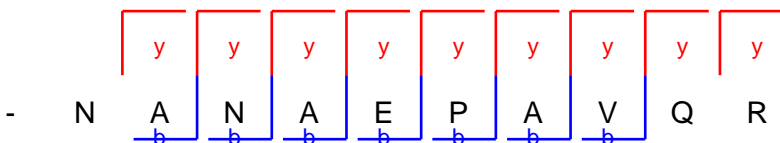

RO-QC-160121\_ZackD\_SS\_Set\_01\_Fraction 6473 FTMS; HCl; 51.45 713.39 LARP6

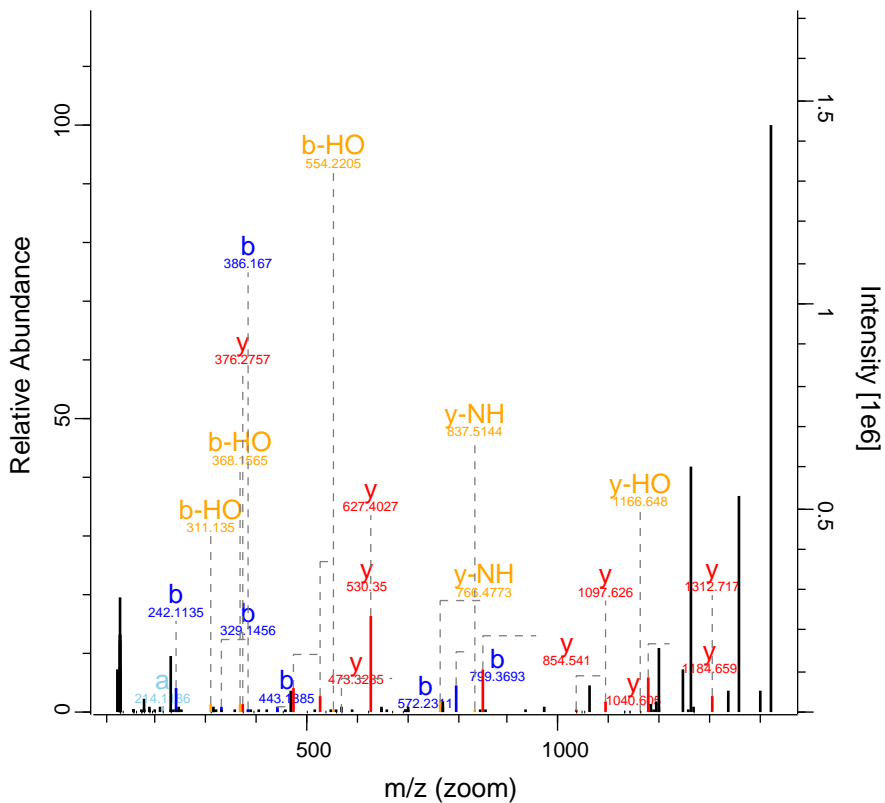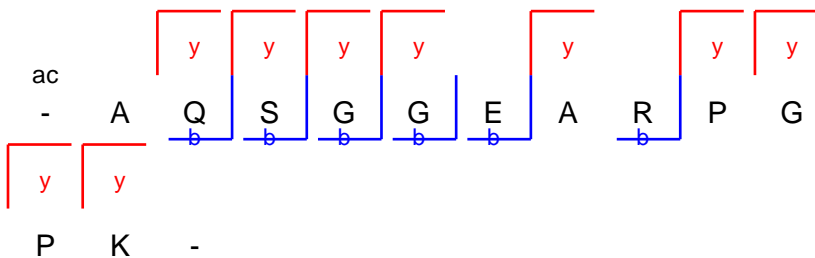



RO-QC-160121\_ZackD\_SS\_Set\_01\_Fraction 6504 FTMS; HC 140.84 681.79 VOPP1

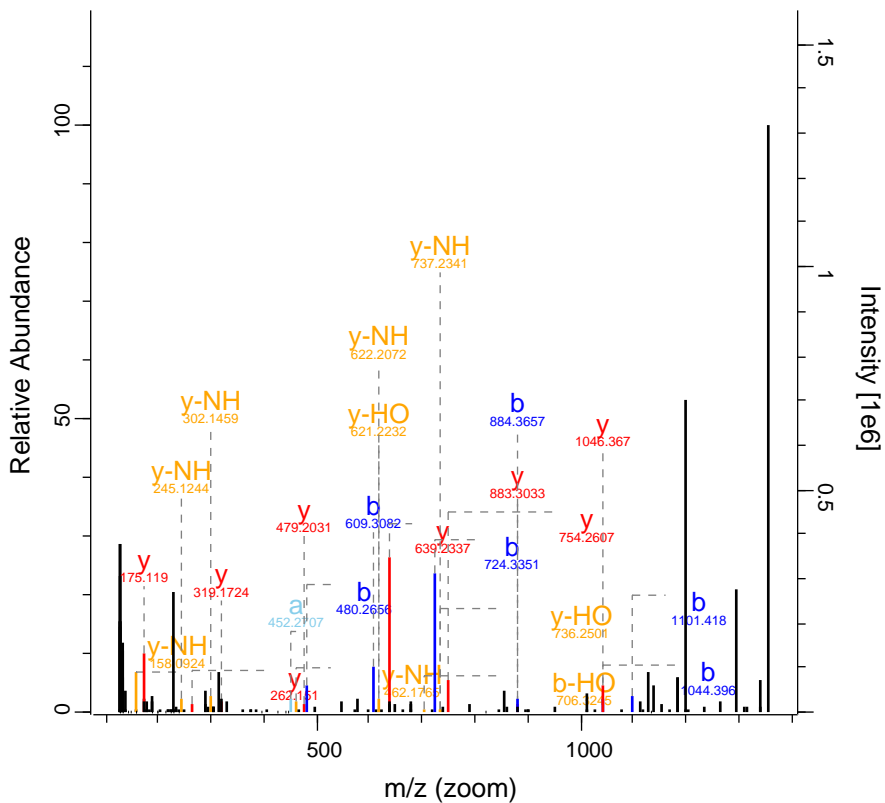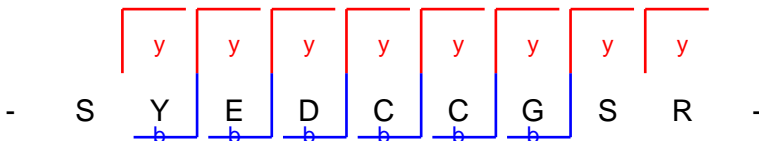

RO-QC-160121\_ZackD\_SS\_Set\_01\_Fraction 6670 FTMS; HCl 95.31 565.8 KIAA1161

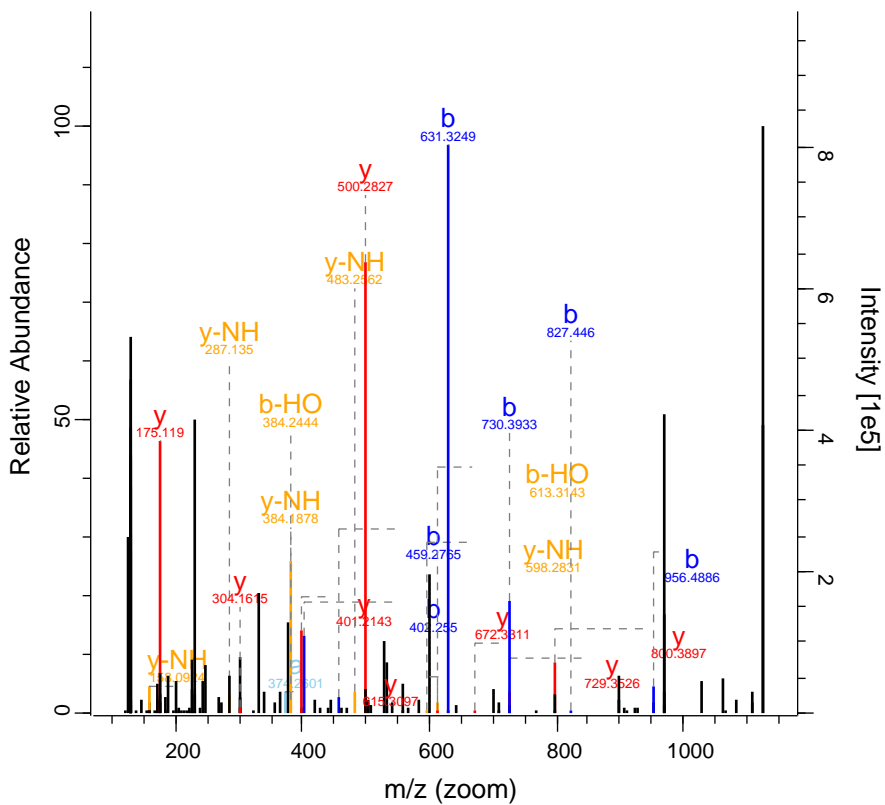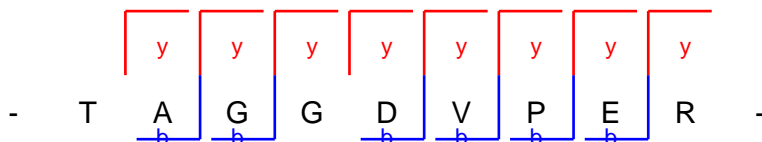

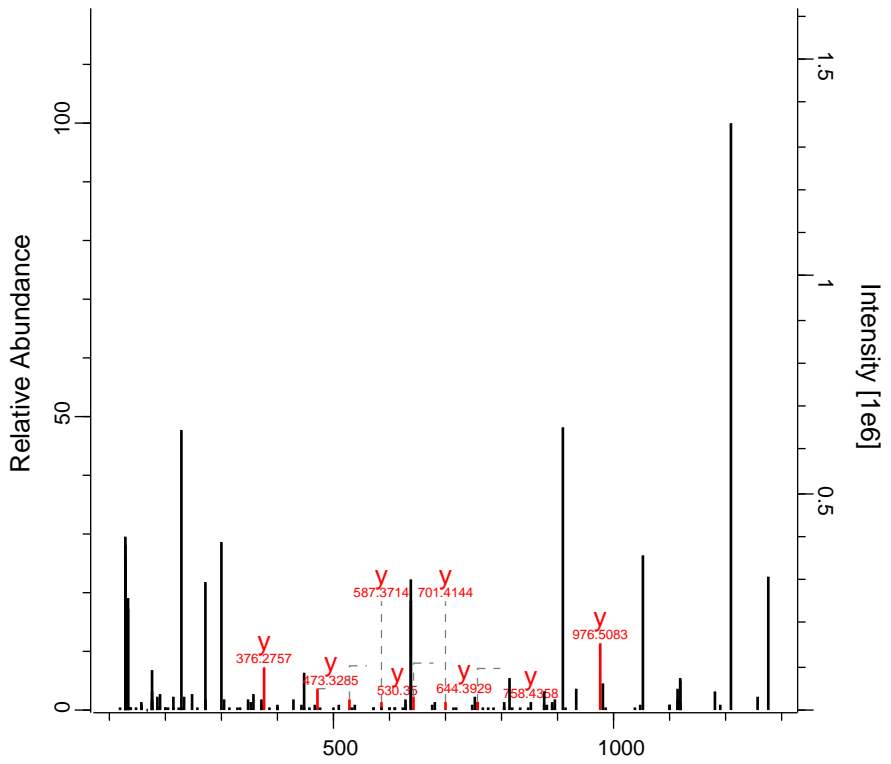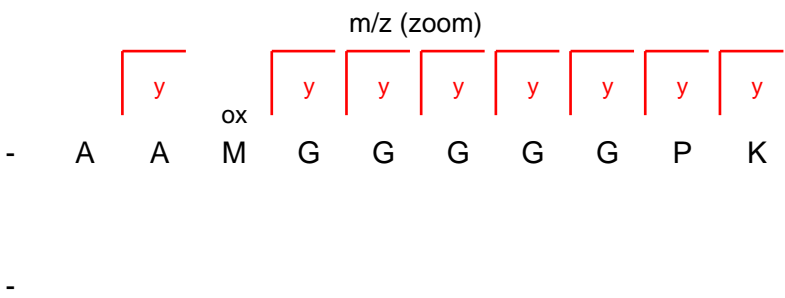

RO-QC-160121\_ZackD\_SS\_Set\_01\_Fraction 7083 FTMS; HC 186.02 780.38 ZNF511

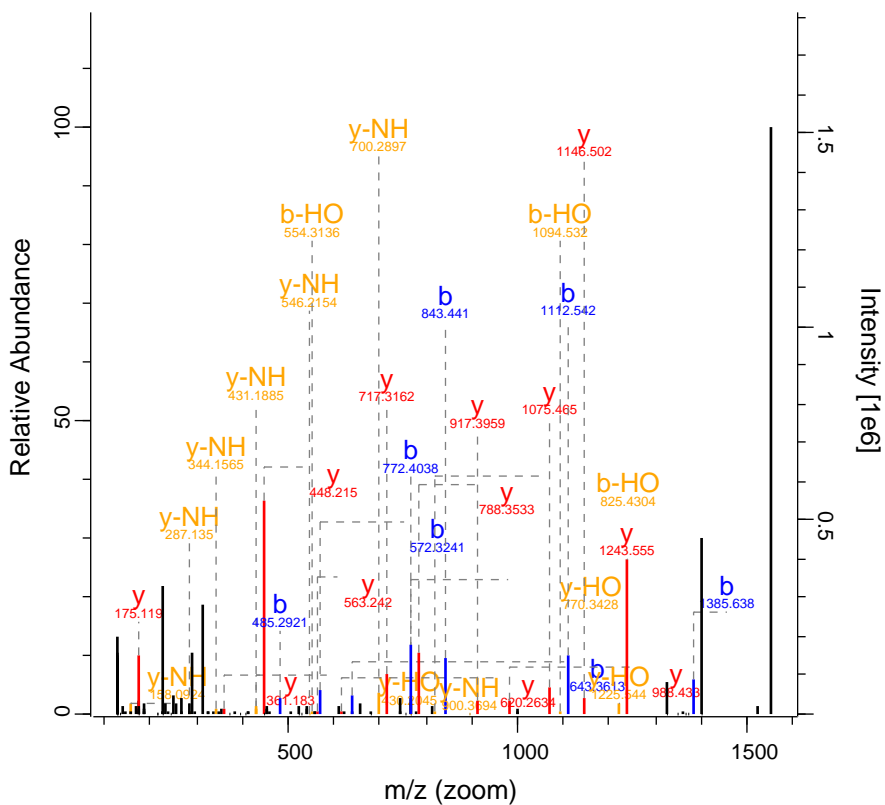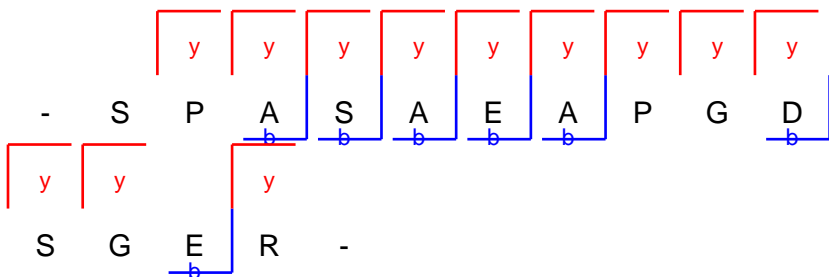

RO-QC-160121\_ZackD\_SS\_Set\_01\_Fraction 7119 FTMS; HCl 29.73 520.92 ZNF511

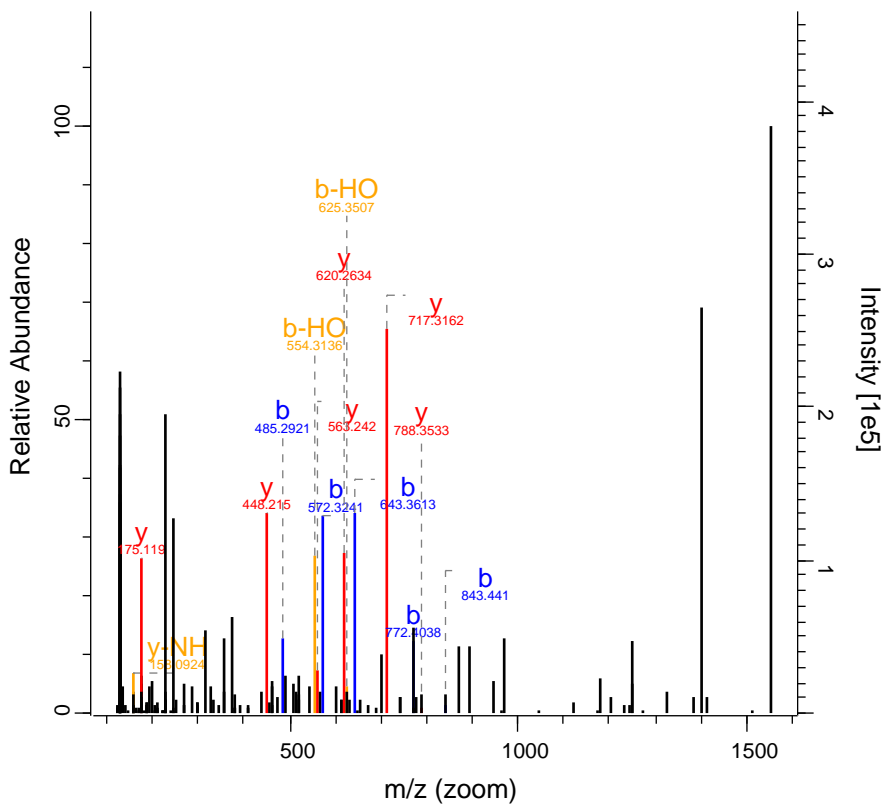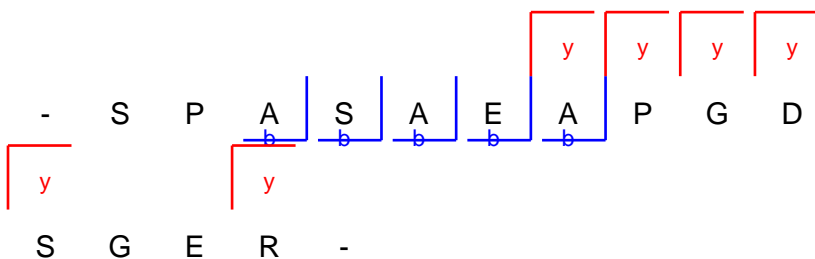

RO-QC-160121\_ZackD\_SS\_Set\_01\_Fraction 7241 FTMS; HC 133.81 798.88 PROSER1

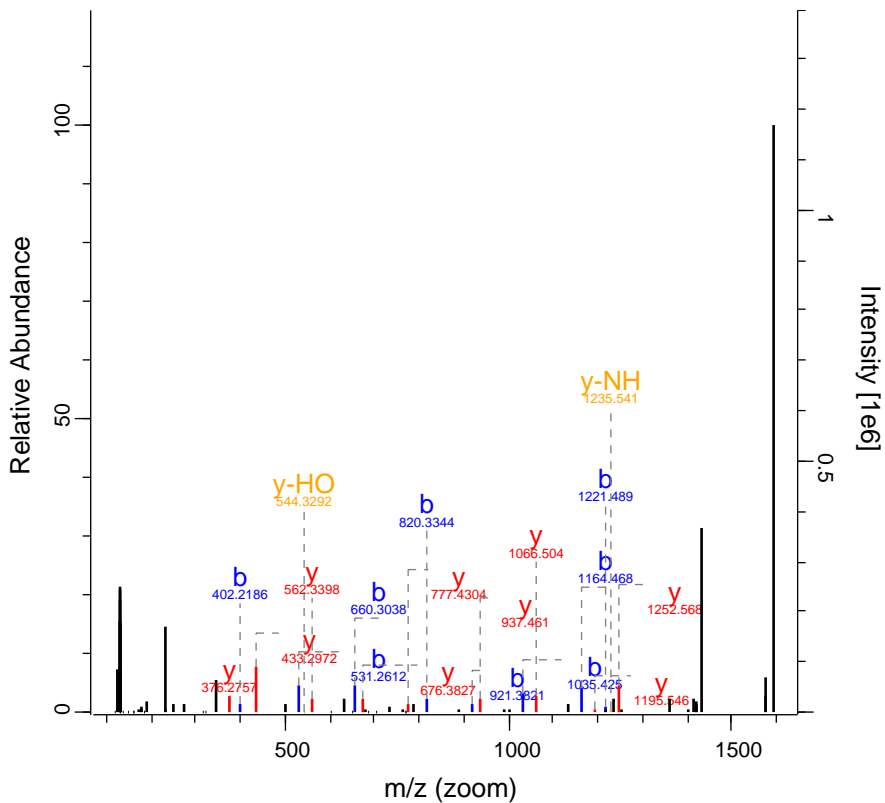

m/z (zoom)

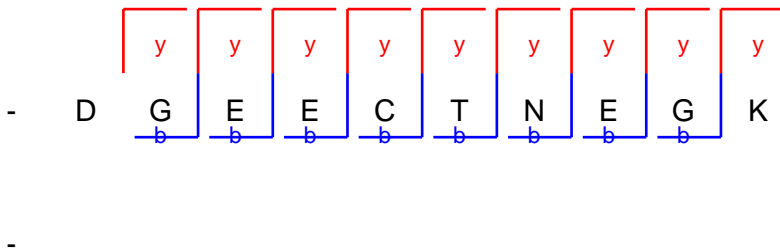

RO-QC-160121\_ZackD\_SS\_Set\_01\_Fraction 7512 FTMS; HCl 83.86 489.51 DCP2

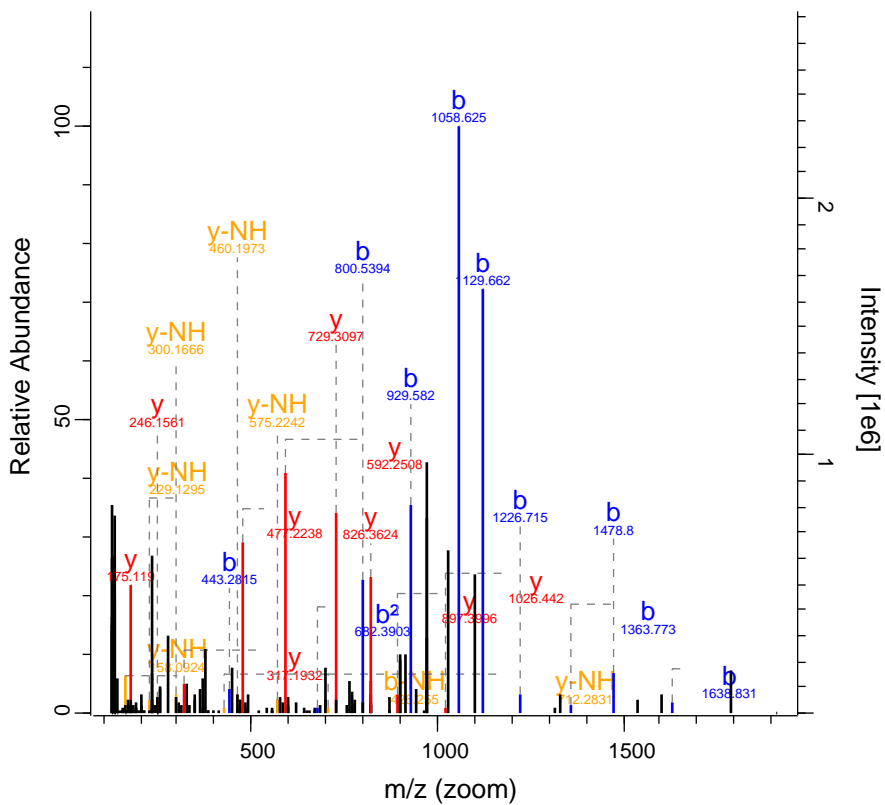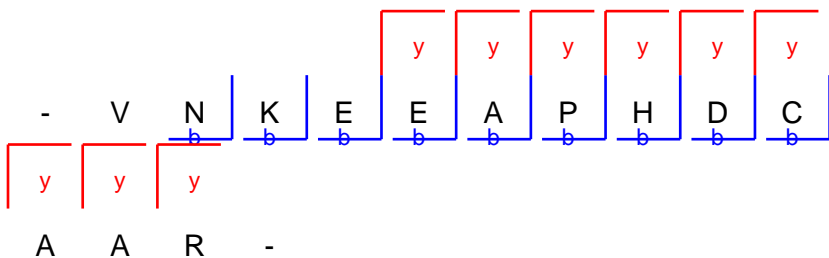

RO-QC-160121\_ZackD\_SS\_Set\_01\_Fraction 7863 FTMS; HC 116.96 716.72 PCGF5

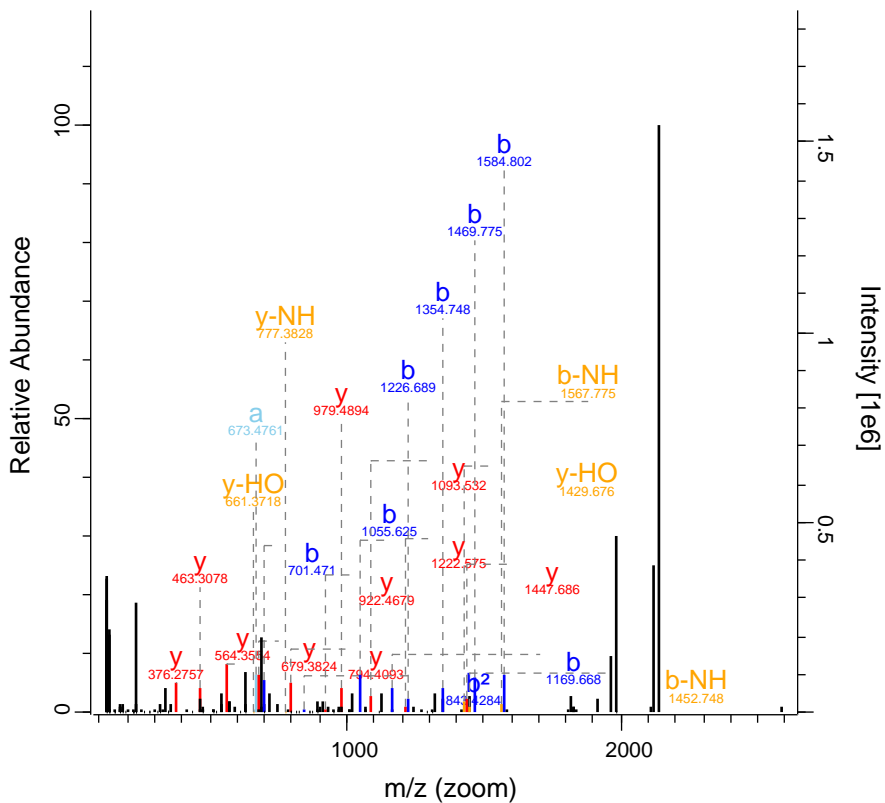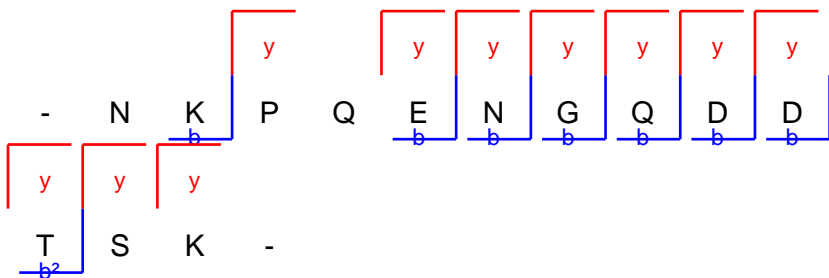



RO-QC-160121\_ZackD\_SS\_Set\_01\_Fraction 7928 FTMS; HC 148.05 743.86 CCBE1

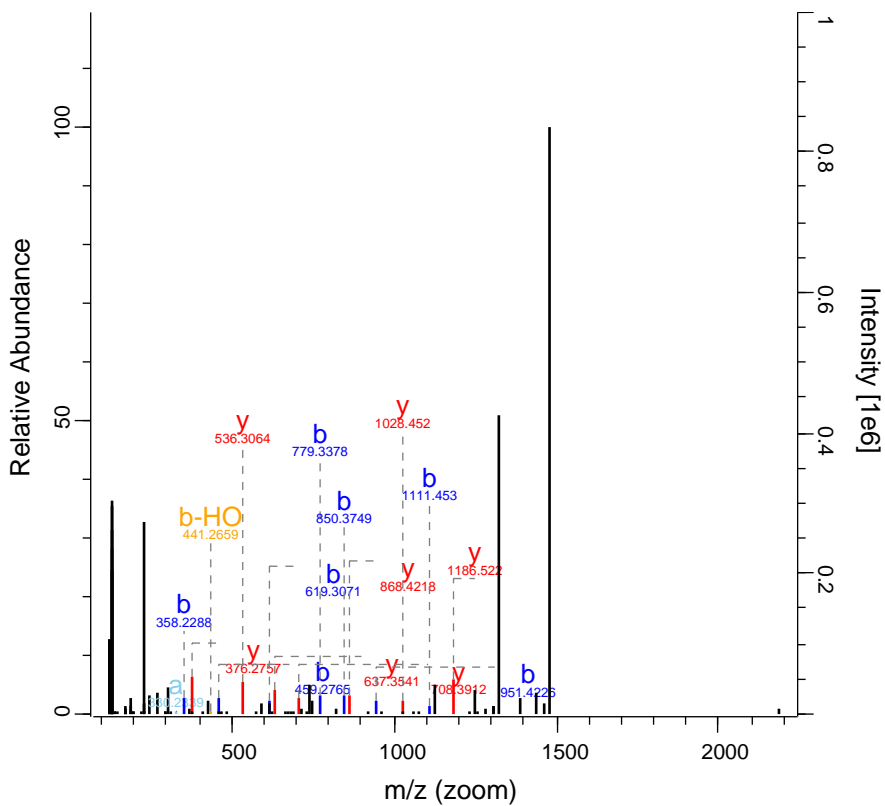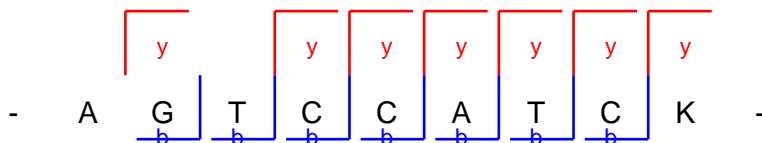

RO-QC-160121\_ZackD\_SS\_Set\_01\_Fraction 8038 FTMS; HCl 44.61 395.48 SHKBP1

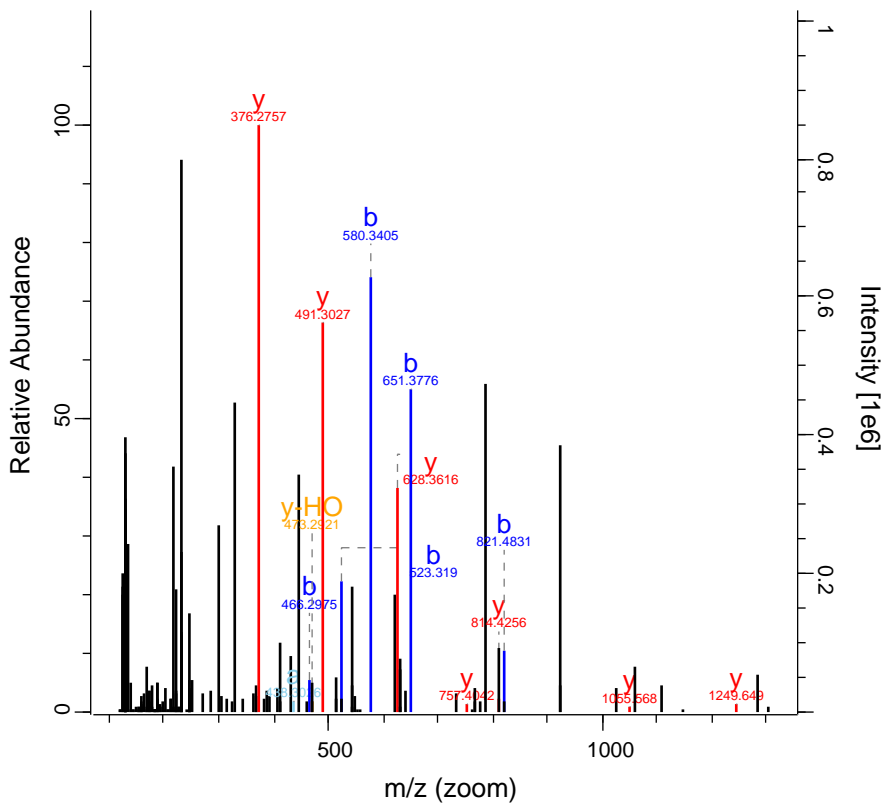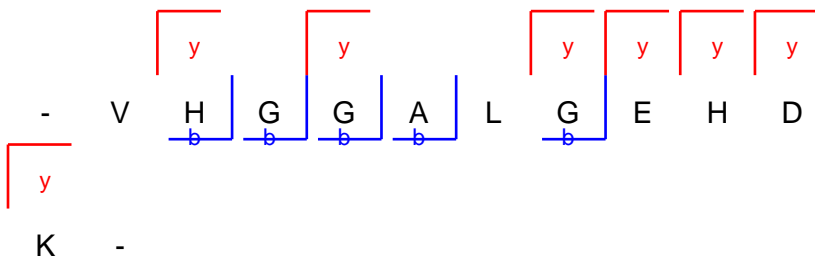

RO-QC-160121\_ZackD\_SS\_Set\_01\_Fraction 8118 FTMS; HCl 63.76 548.26 A2M

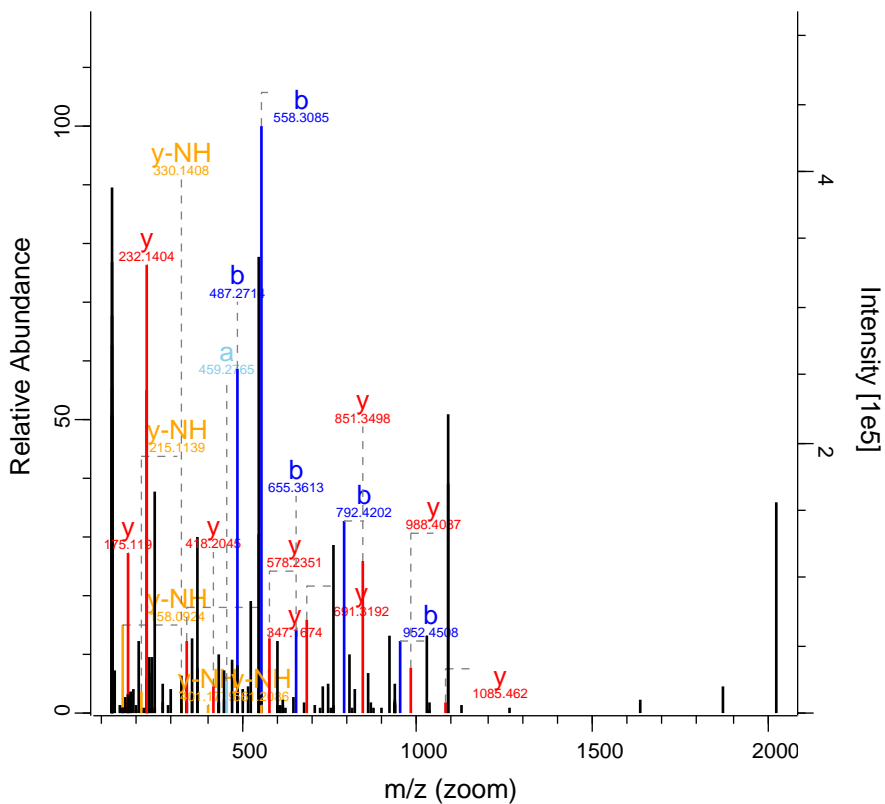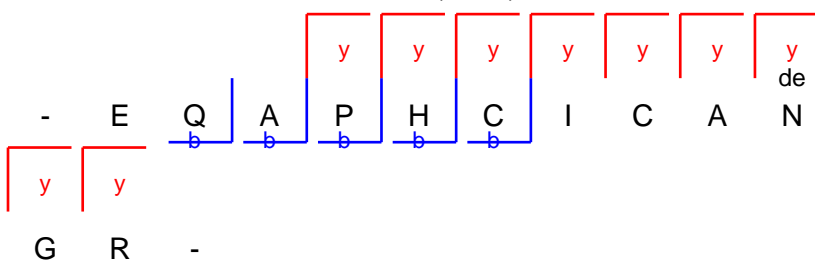

RO-QC-160121\_ZackD\_SS\_Set\_01\_Fraction 8496 FTMS; HC 216.12 815.47 NCKAP5

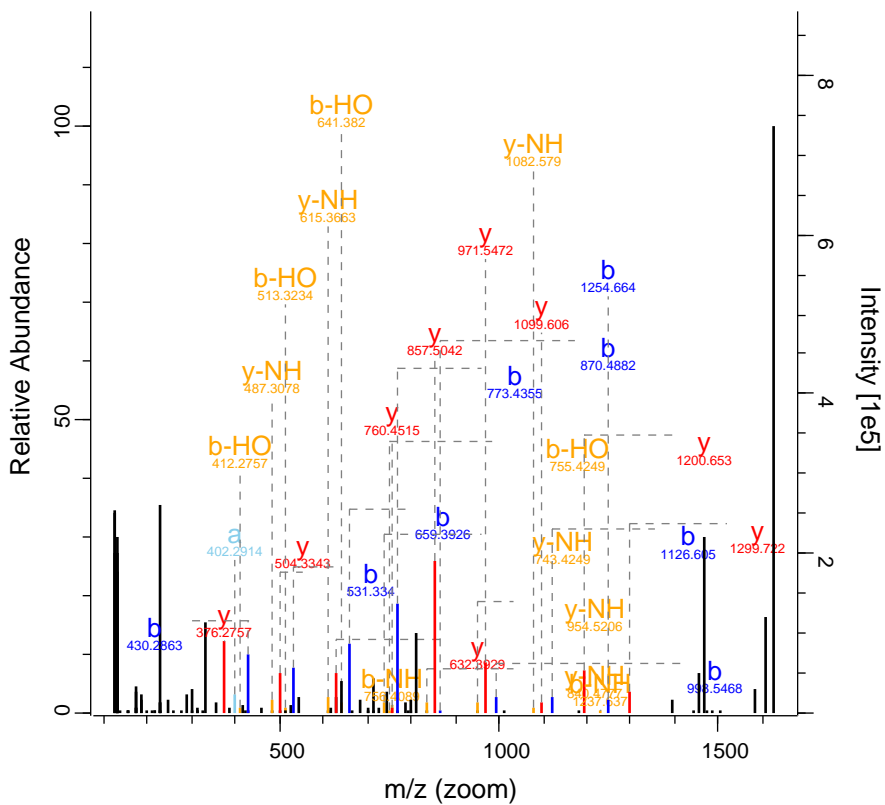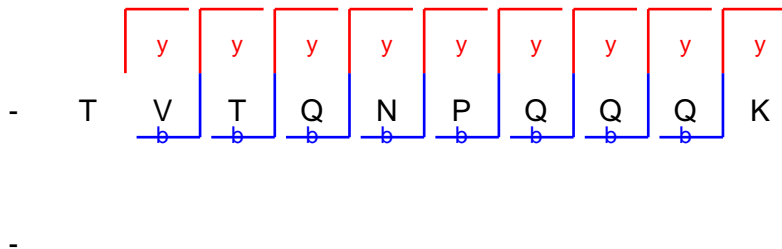

RO-QC-160121\_ZackD\_SS\_Set\_01\_Fraction 8509 FTMS; HCl 116.52 808.9 ZMYND19

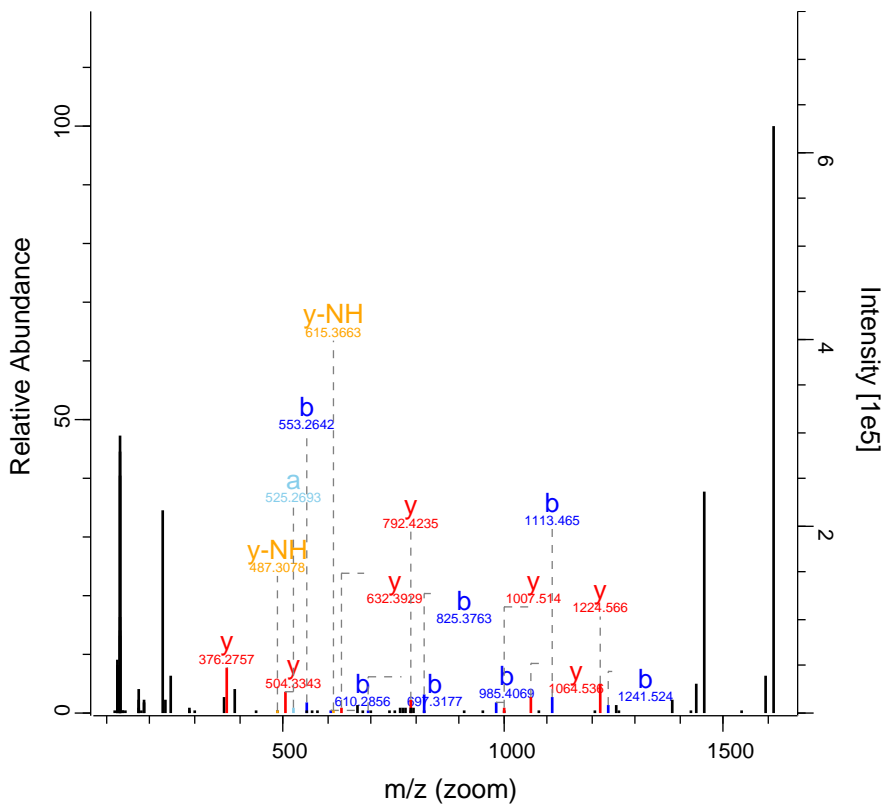

m/z (zoom)

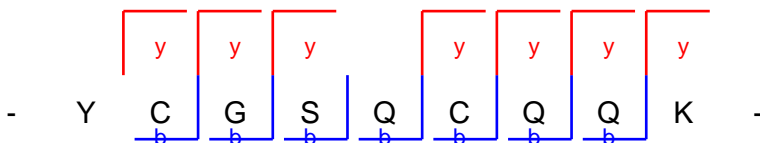

RO-QC-160121\_ZackD\_SS\_Set\_01\_Fraction 8554 FTMS; HCl 67.17 803.96 VSIG1

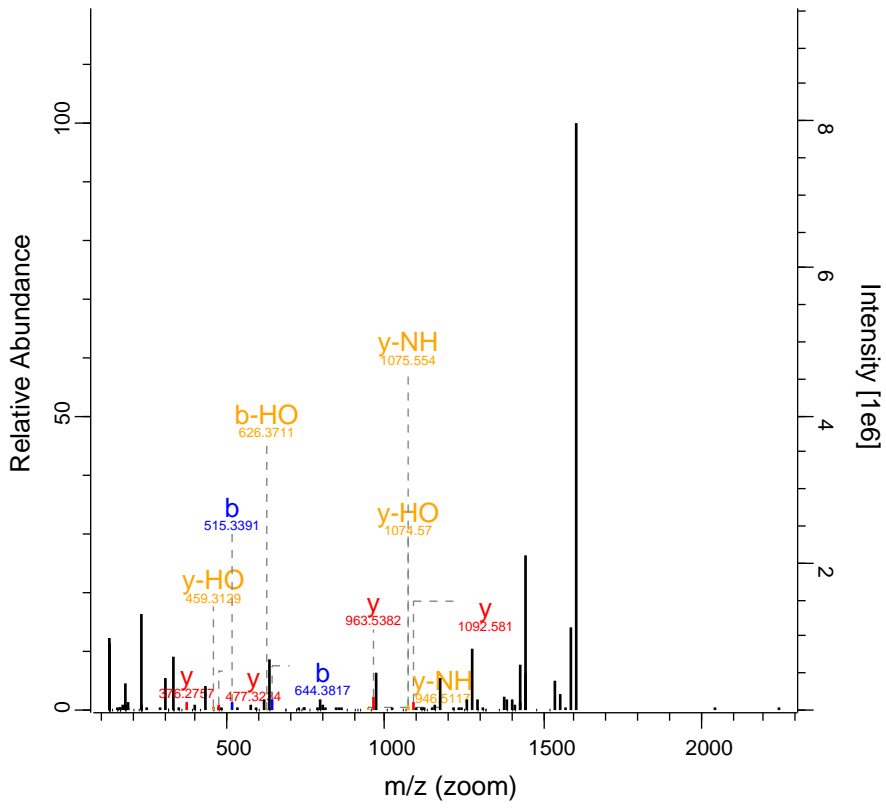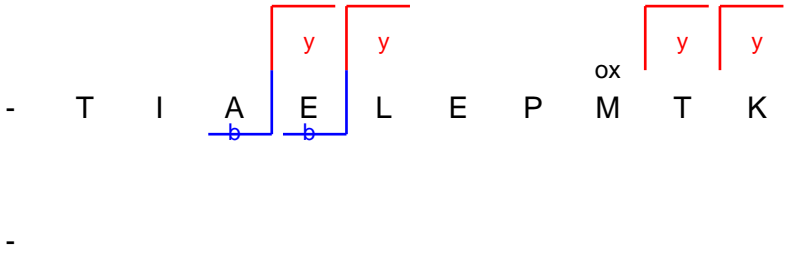

RO-QC-160121\_ZackD\_SS\_Set\_01\_Fraction 9038 FTMS; HCl 85.06 453.26 RNASEH1

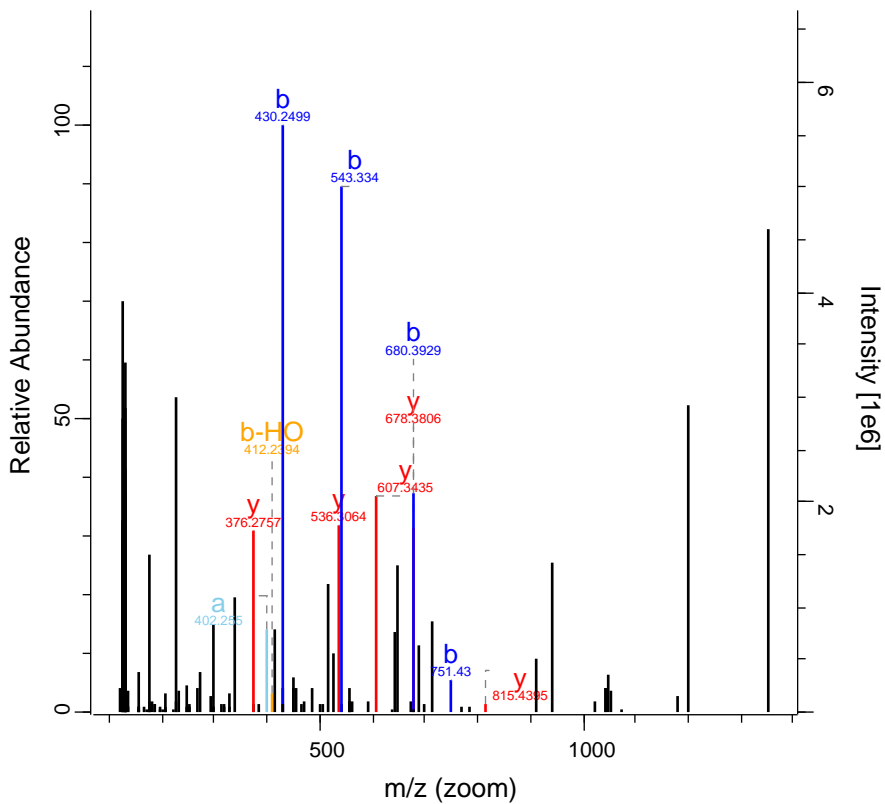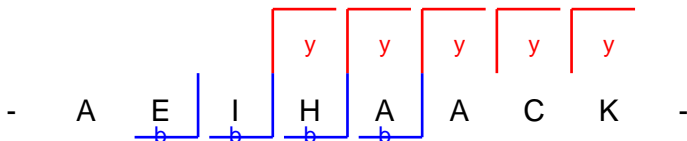

RO-QC-160121\_ZackD\_SS\_Set\_01\_Fraction 10262 FTMS; HCl 55.11 841.9 GLRX2

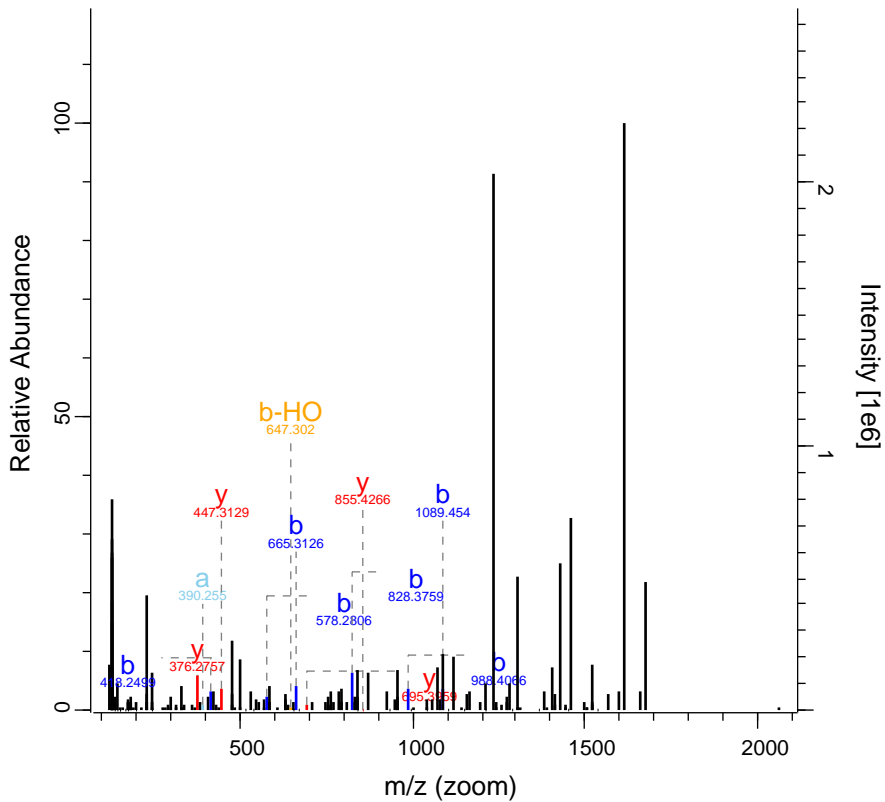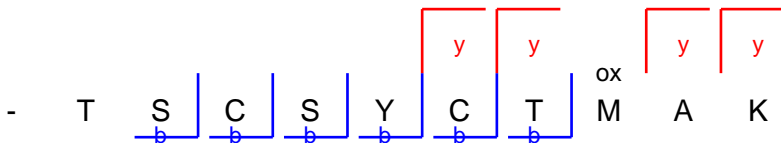



RO-QC-160121\_ZackD\_SS\_Set\_01\_Fraction 10335 FTMS; HC 76.76 571.31 SMIM7

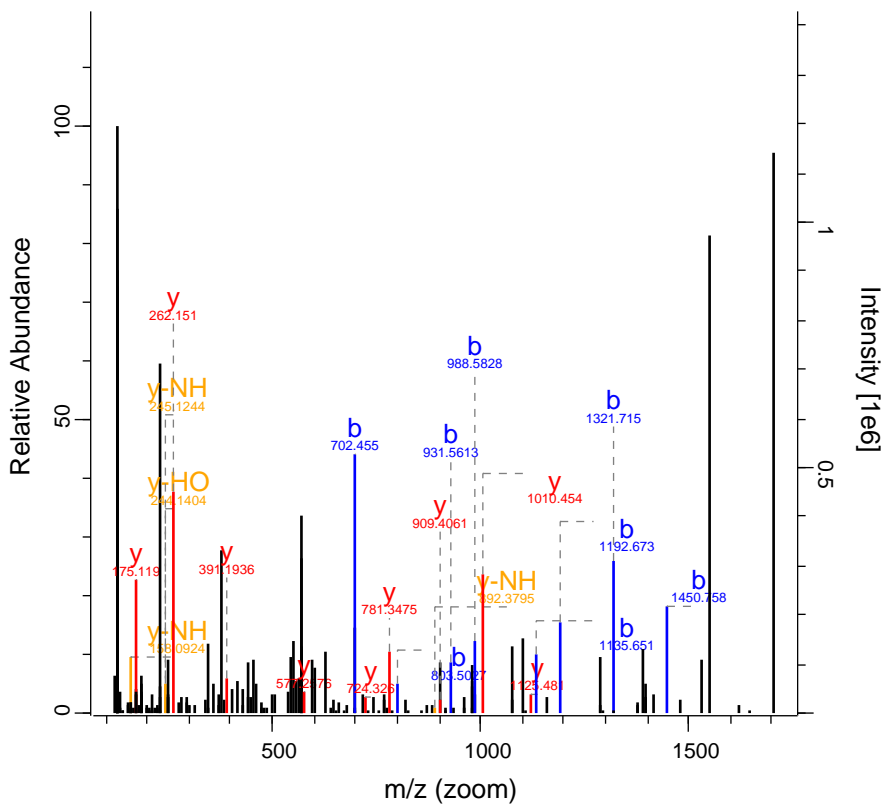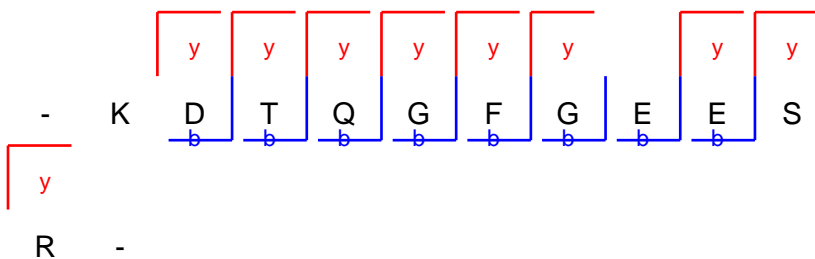

RO-QC-160121\_ZackD\_SS\_Set\_01\_Fractio 10481 FTMS; HC 154.35 637.88 G6PC3

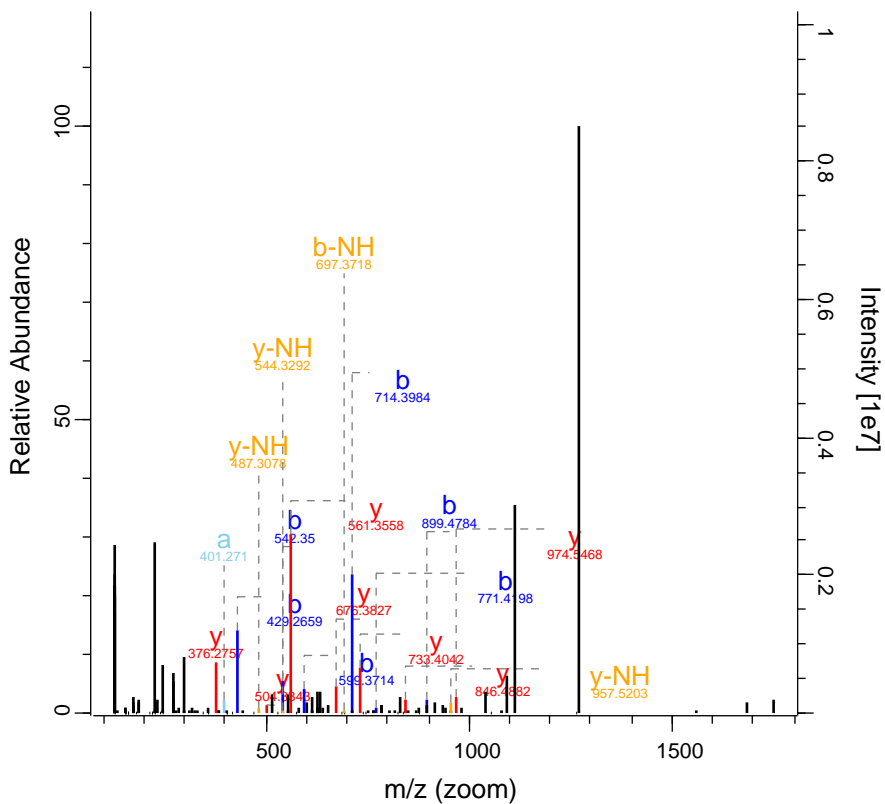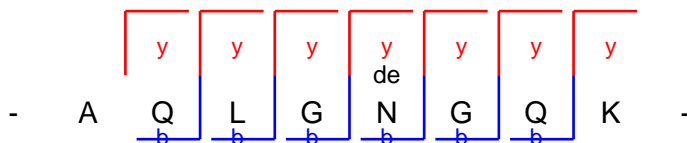

RO-QC-160121\_ZackD\_SS\_Set\_01\_Fractio 10926 FTMS; HC 190.85 674.72 PRKRIR

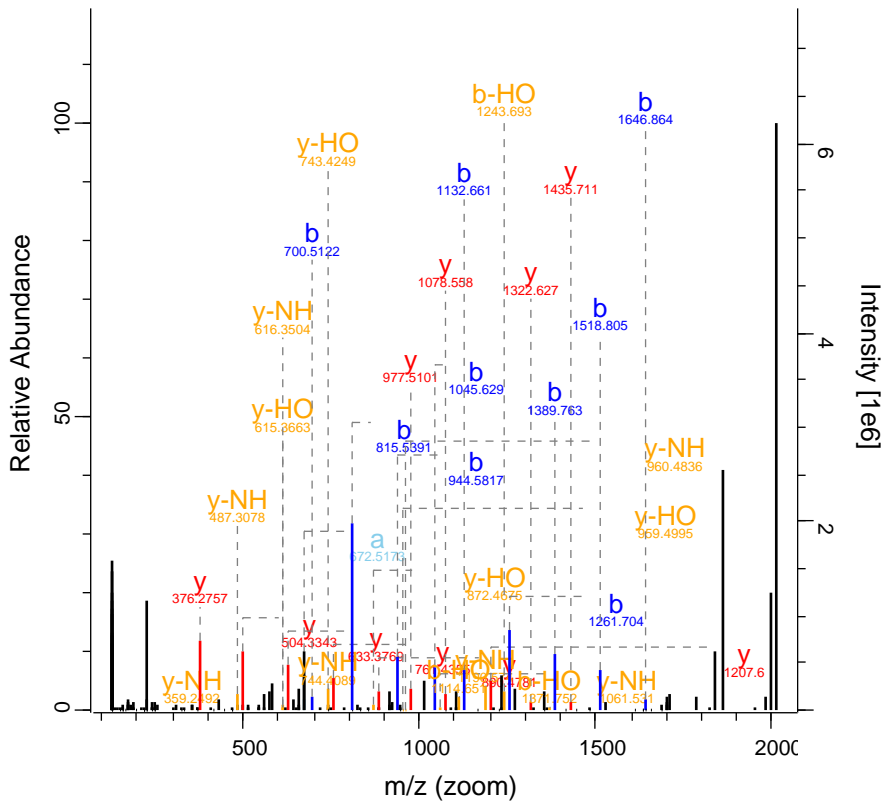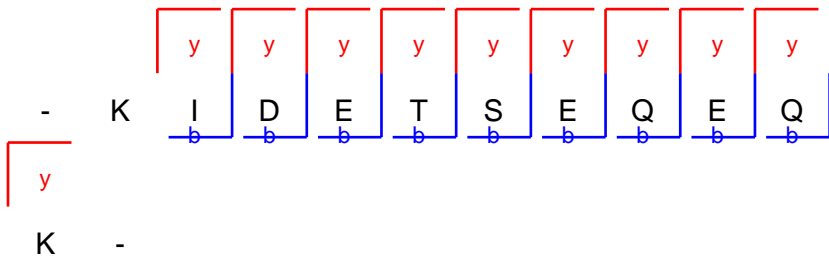

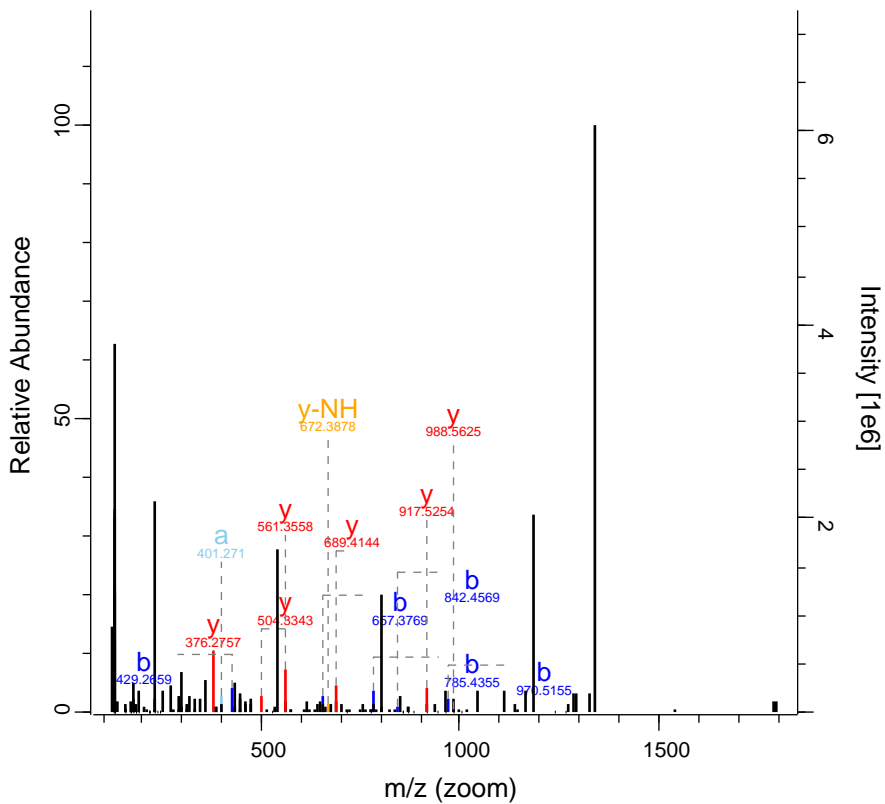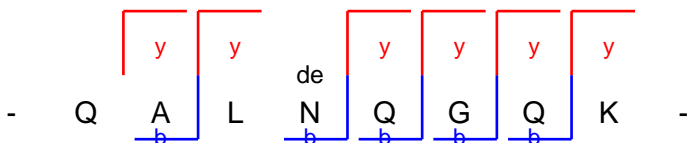

RO-QC-160121\_ZackD\_SS\_Set\_01\_Fractio 11563 FTMS; HC 100.45 464.61 KCNV2

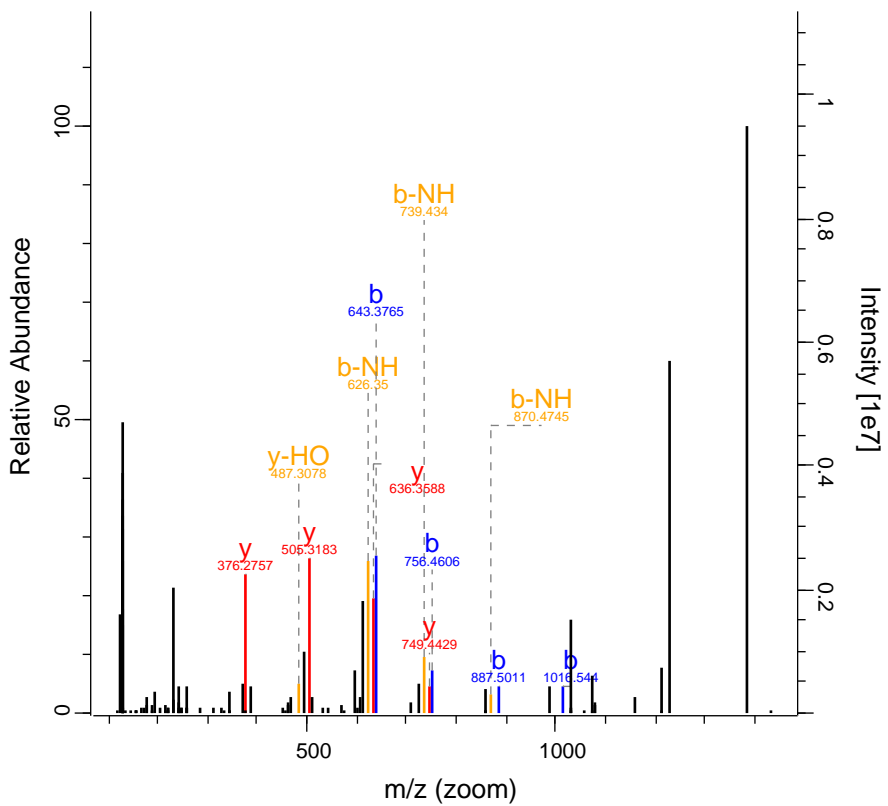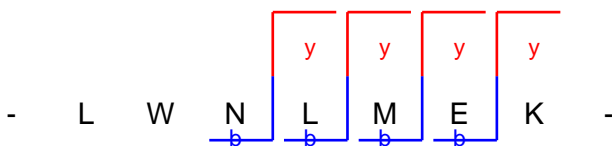

RO-QC-160121\_ZackD\_SS\_Set\_01\_Fractic 12017 FTMS; HC 75.51 1035.99 MRC1

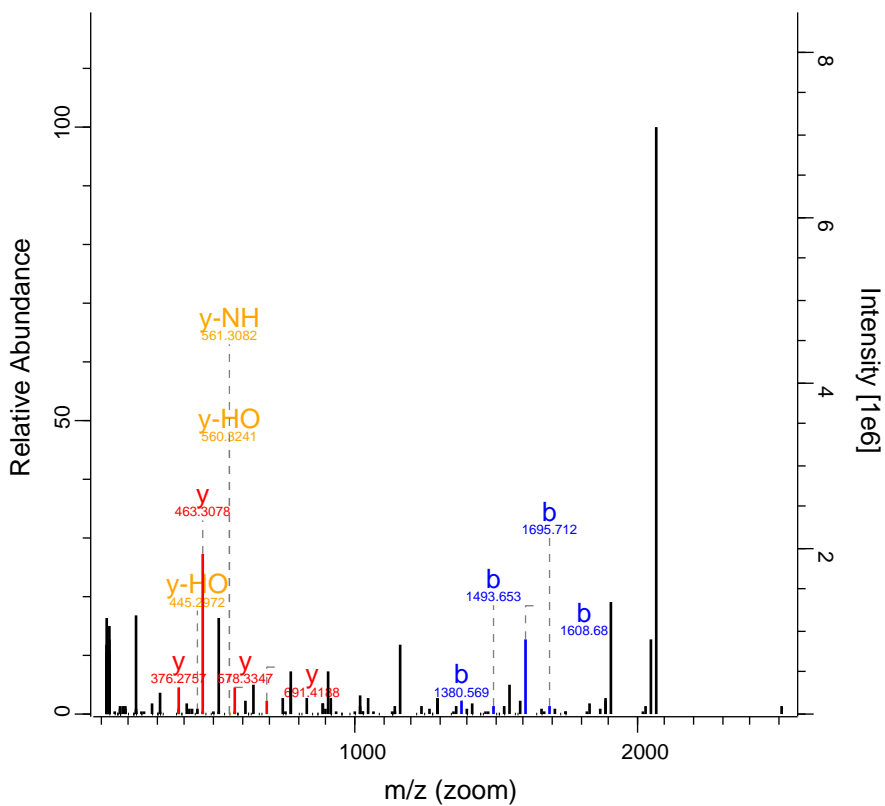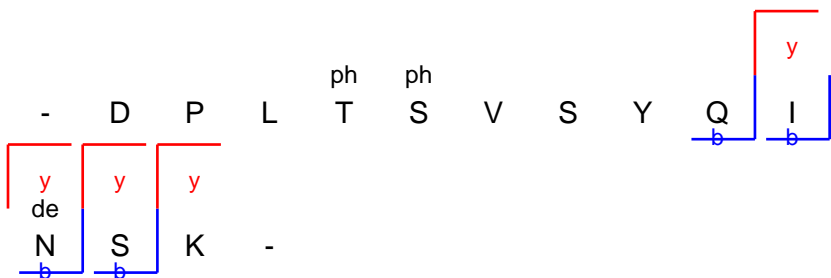

RO-QC-160121\_ZackD\_SS\_Set\_01\_Fractio 12308 FTMS; HC 136.64 765.91 SLC29A1

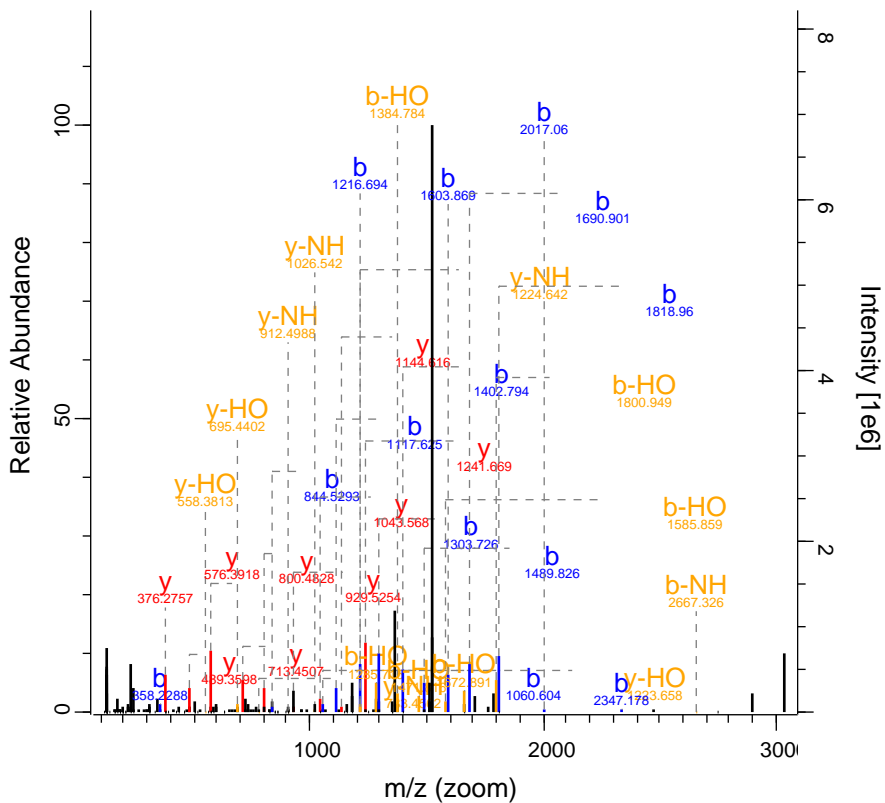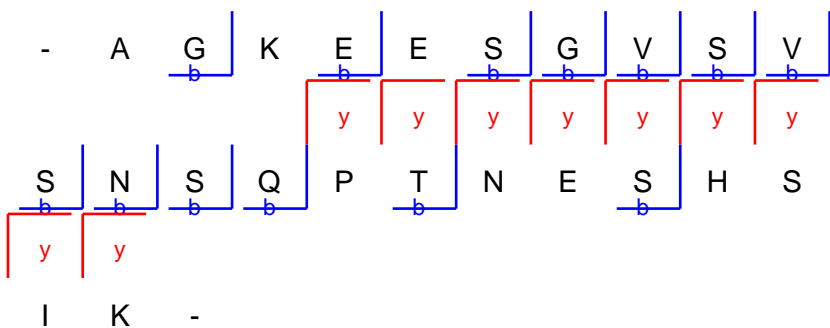

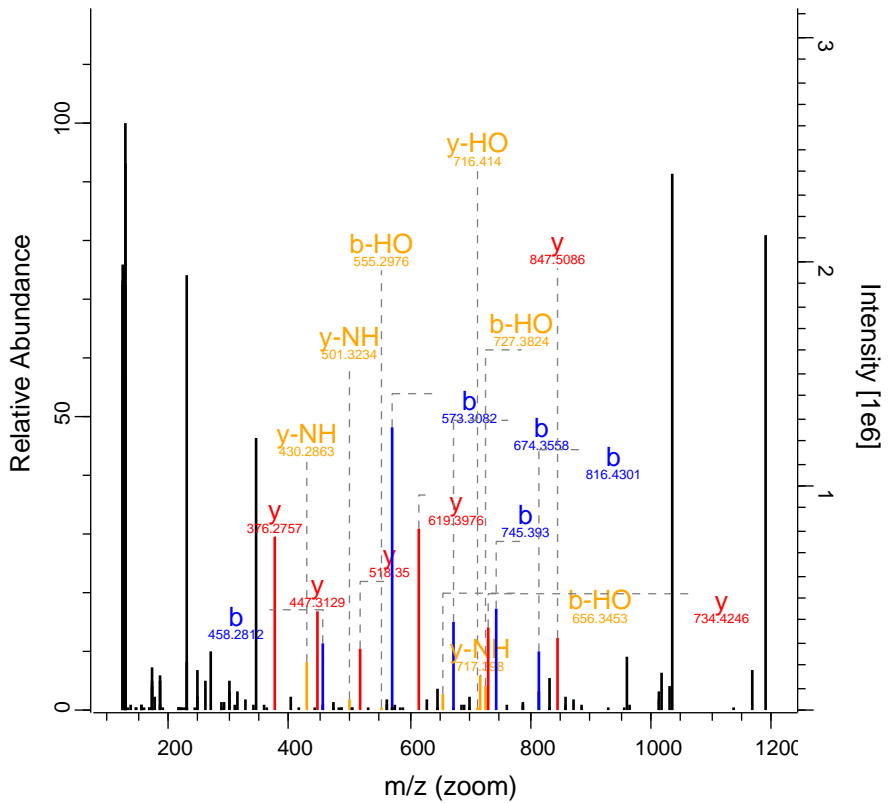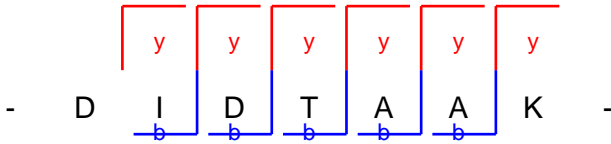



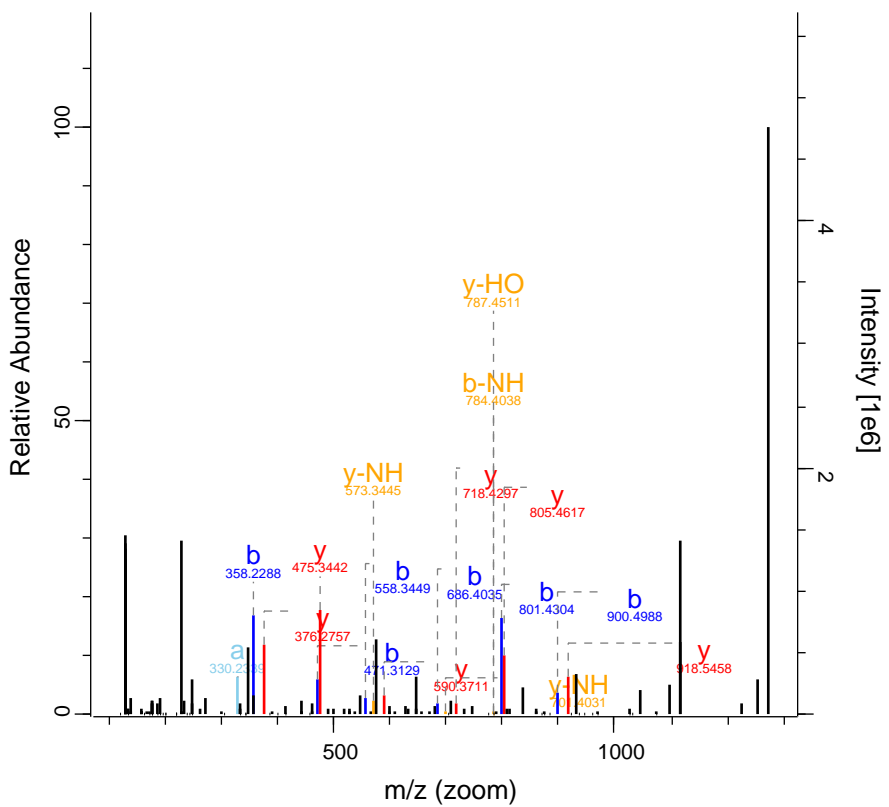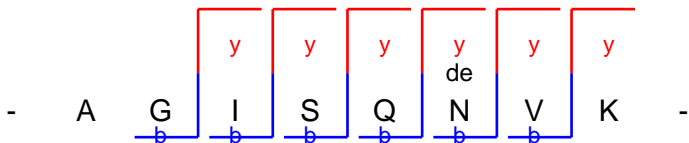

RO-QC-160121\_ZackD\_SS\_Set\_01\_Fraction 12787 FTMS; HC 59.71 818.77 SLC6A17

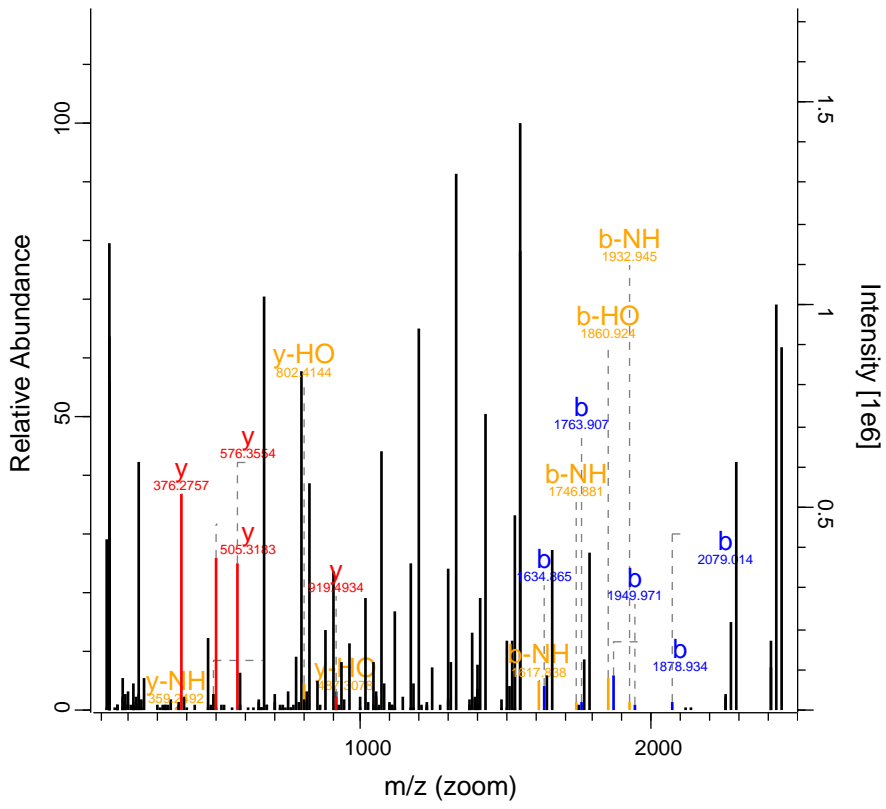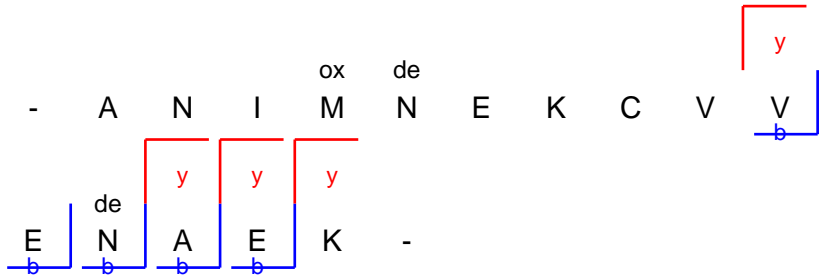

RO-QC-160121\_ZackD\_SS\_Set\_01\_Fraction 13378 FTMS; HC 62.55 637.86 ZNF706

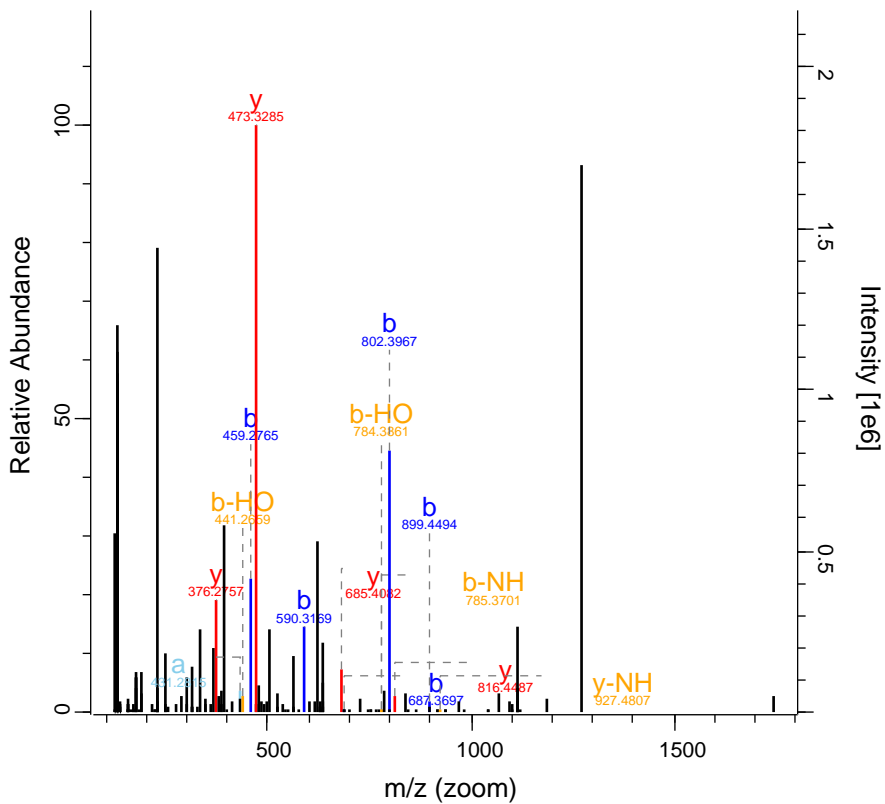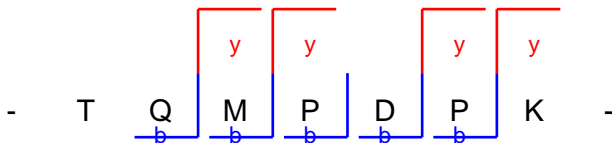

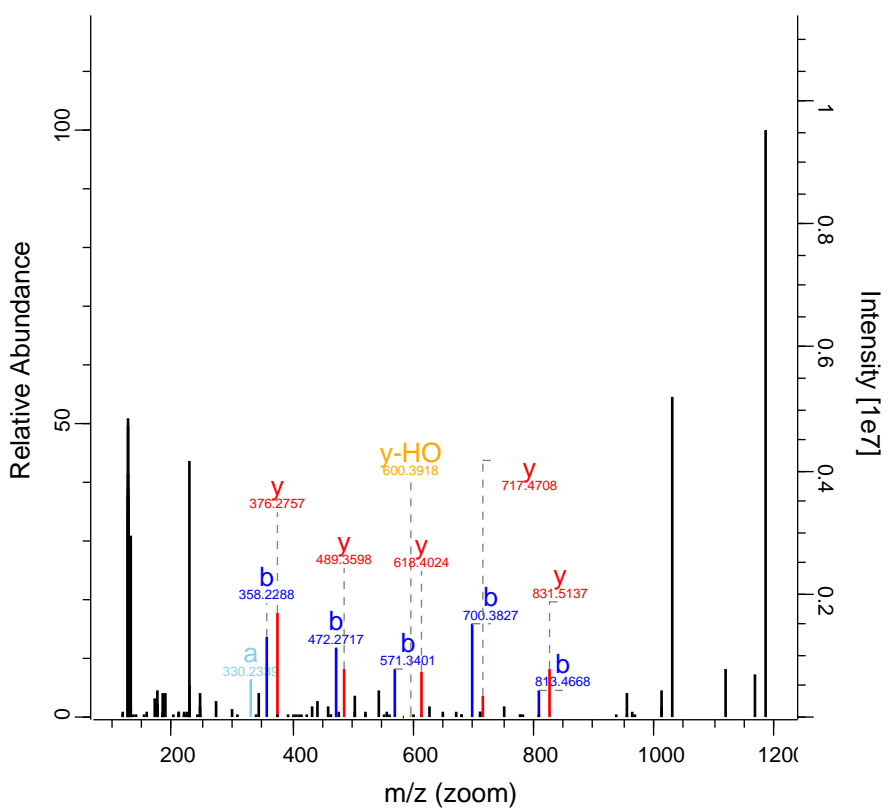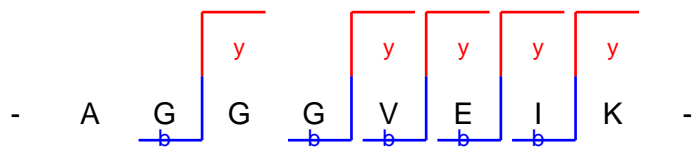

RO-QC-160121\_ZackD\_SS\_Set\_01\_Fraction 13815 FTMS; HC 60.02 780.45 WRAP73

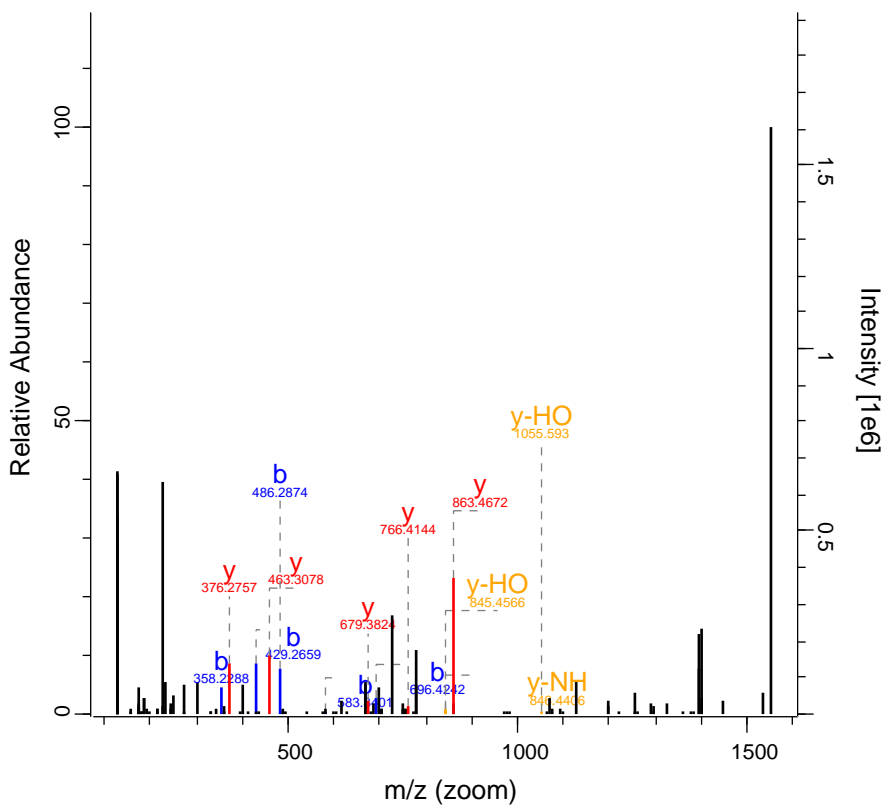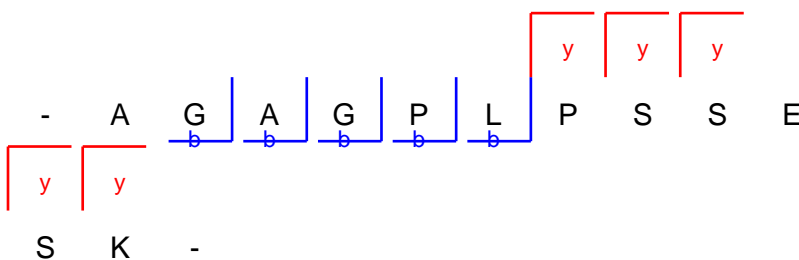

RO-QC-160121\_ZackD\_SS\_Set\_01\_Fraction 13932 FTMS; HC 94.19 548.99 STRADB

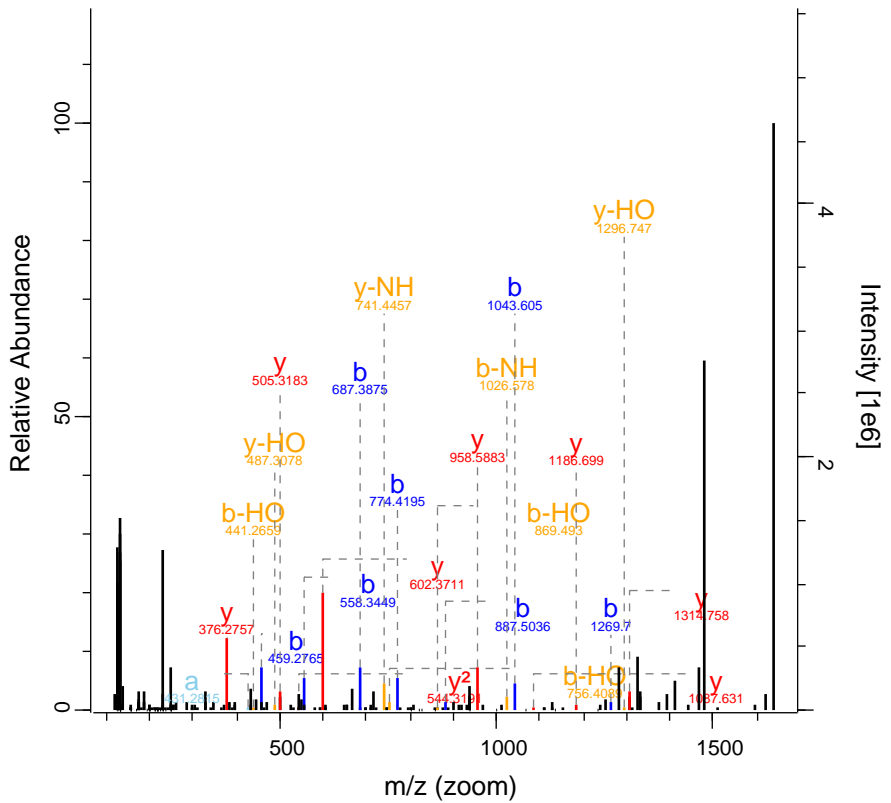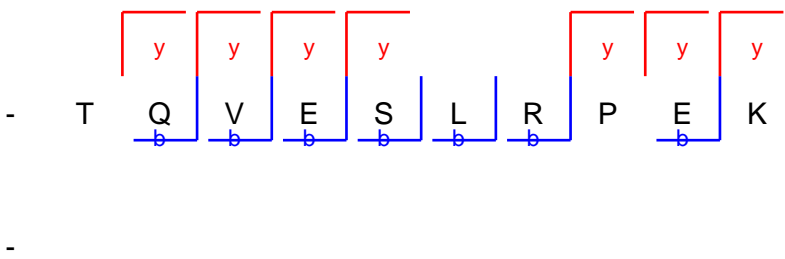

RO-QC-160121\_ZackD\_SS\_Set\_01\_Fractio 14080 FTMS; HC 141.27 740.35 ANAPC16

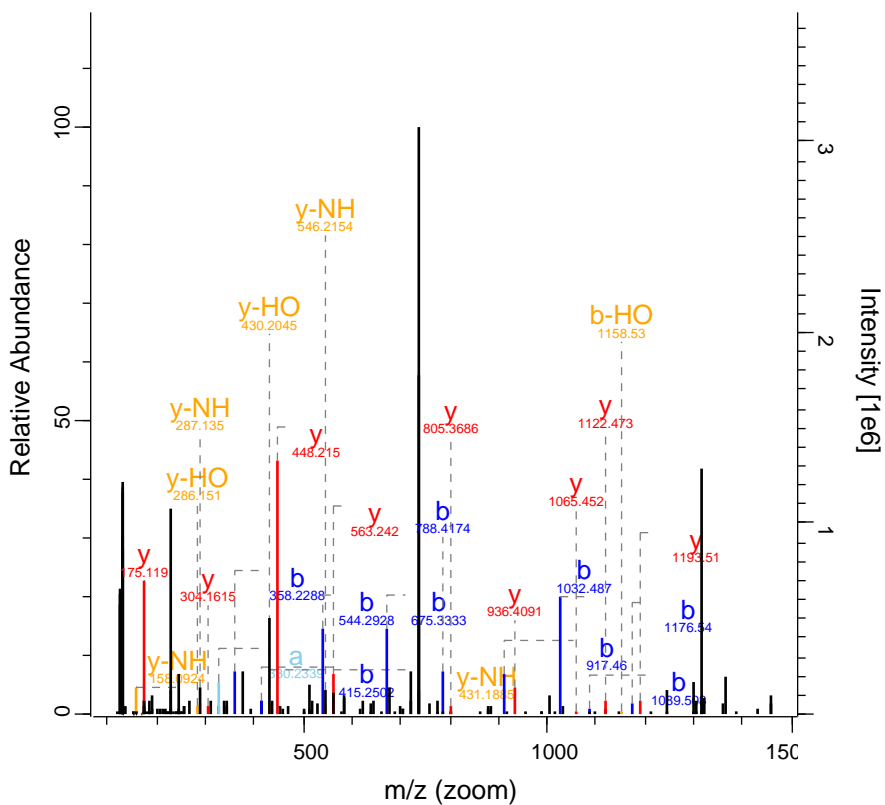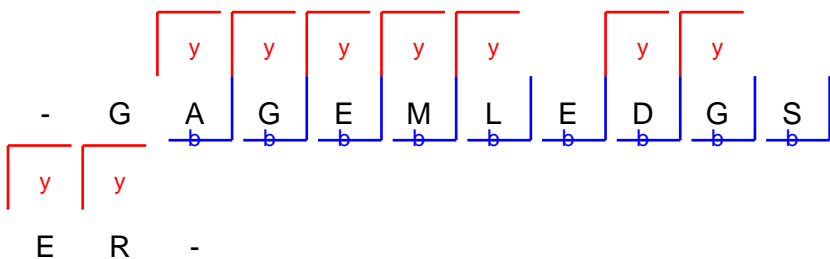

E R -

RO-QC-160121\_ZackD\_SS\_Set\_01\_Fractio 14107 FTMS; HC 129.38 753.92 MED28

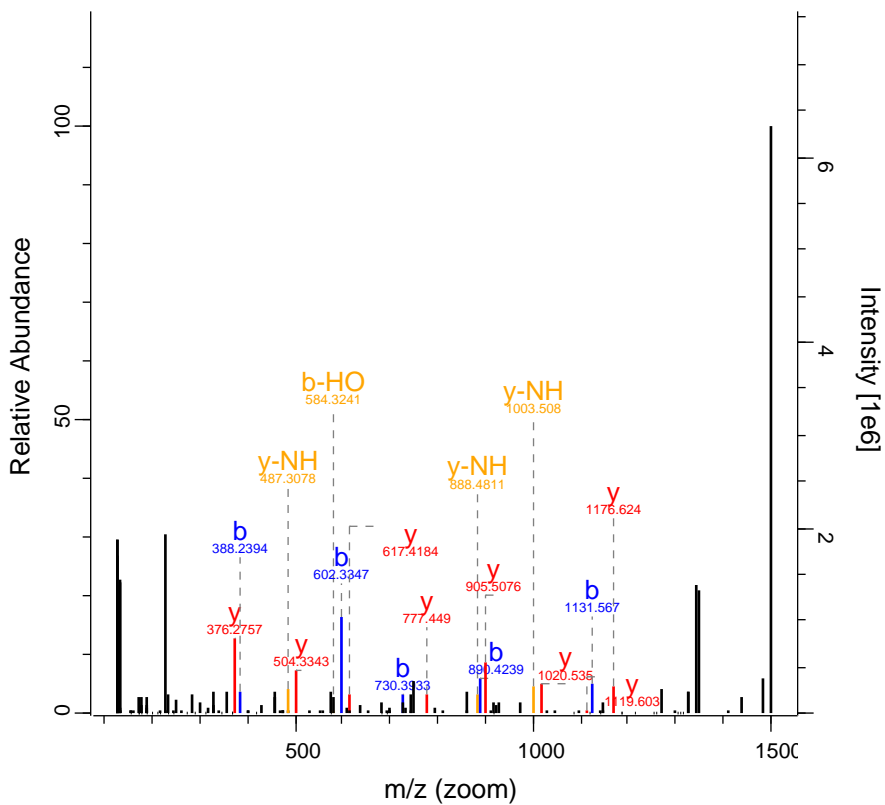

m/z (zoom)

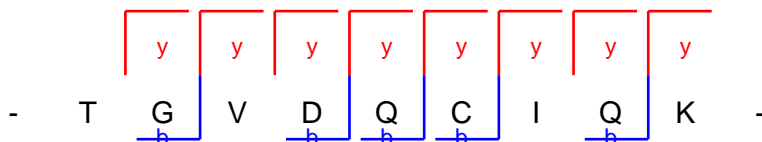



RO-QC-160121\_ZackD\_SS\_Set\_01\_Fraction 14201 FTMS; HC 84.66 956.01 GPR110

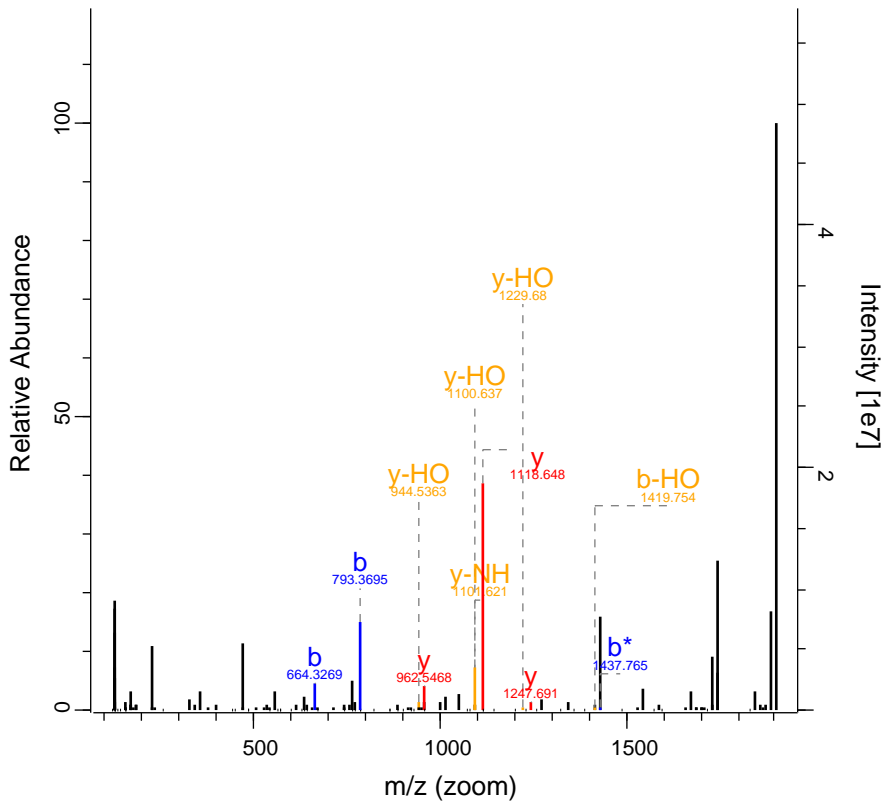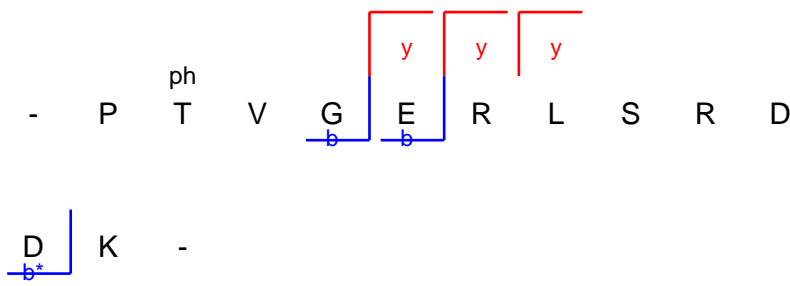

RO-QC-160121\_ZackD\_SS\_Set\_01\_Fraction 14882 FTMS; HC 49.81 677.87 TIGD1

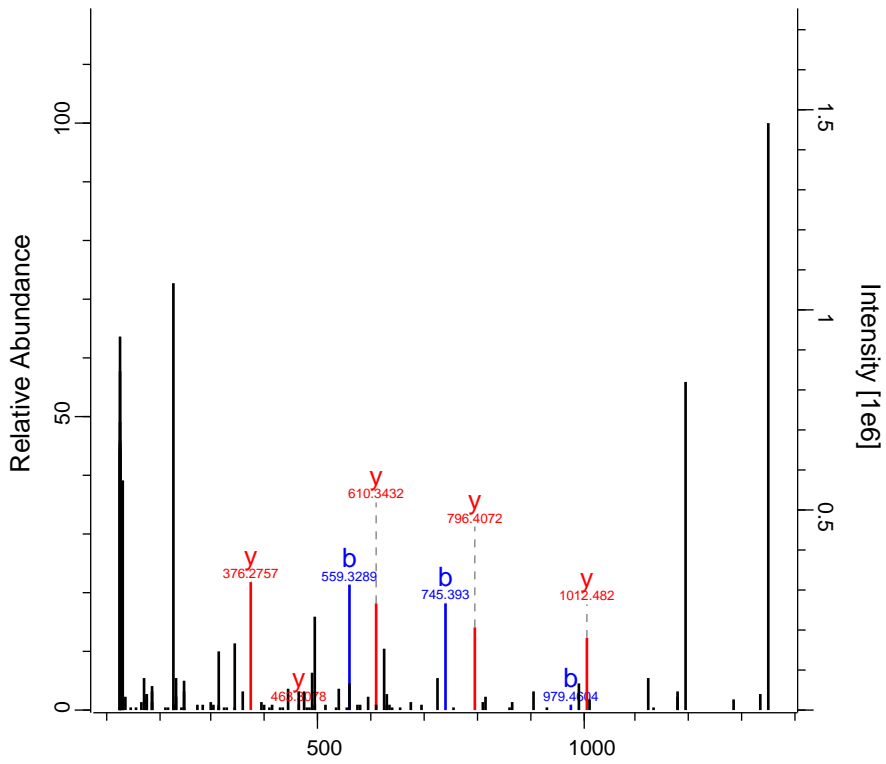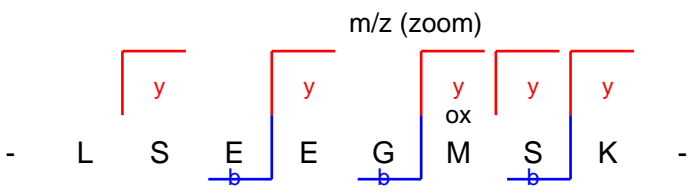

RO-QC-160121\_ZackD\_SS\_Set\_01\_Fraction 14902 FTMS; HC 98.58 596.32 TMEM41B

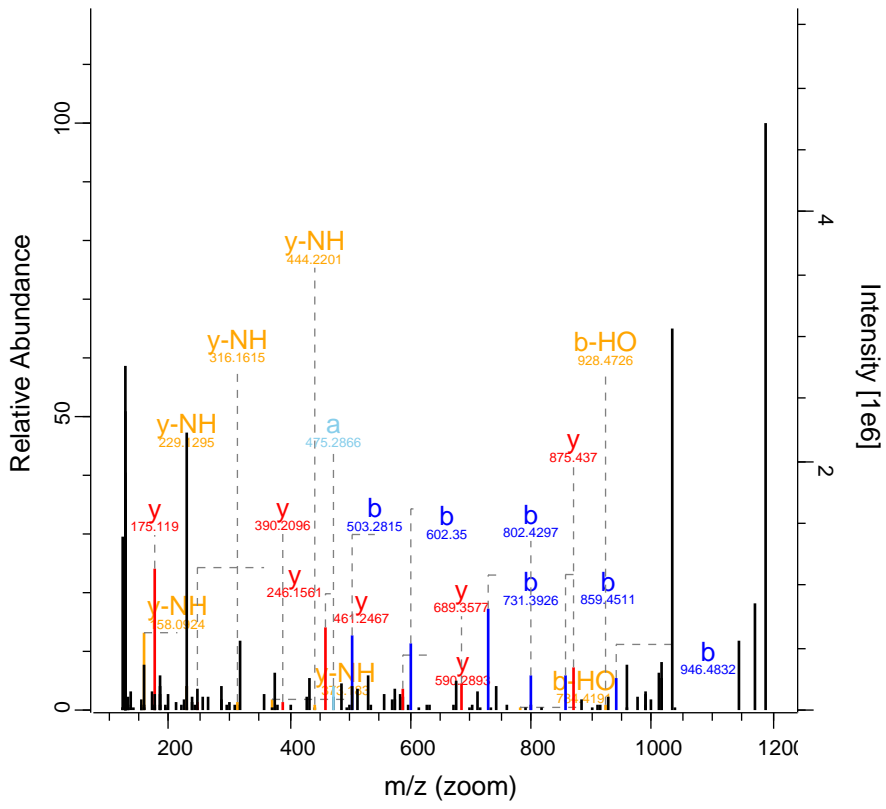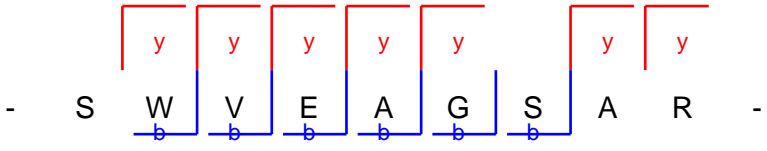

RO-QC-160121\_ZackD\_SS\_Set\_01\_Fractio 15364 FTMS; HC 109.65 770.43 SAYSD1

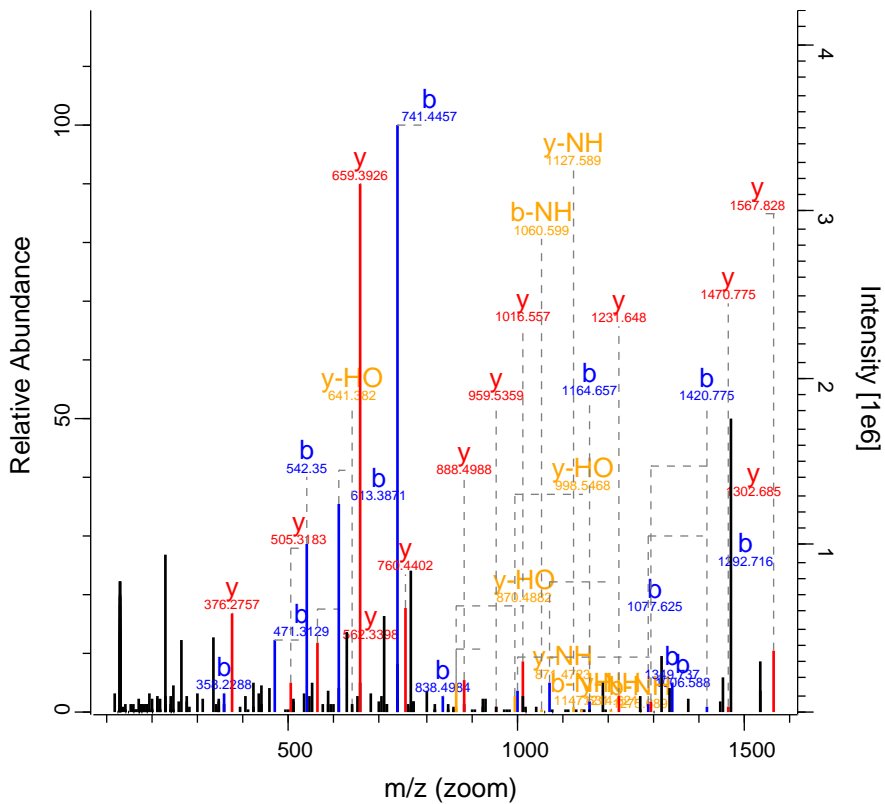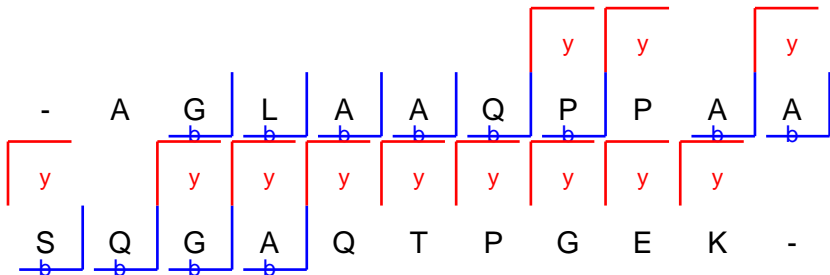

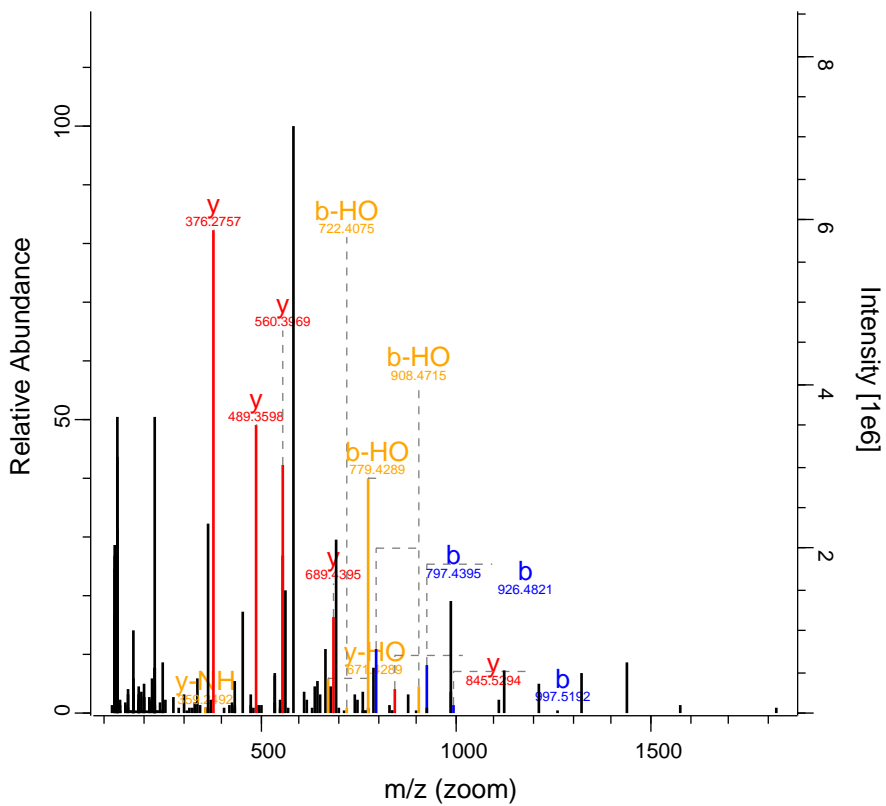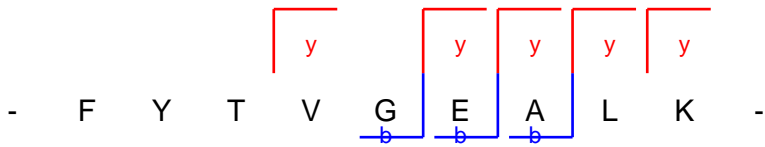

RO-QC-160121\_ZackD\_SS\_Set\_01\_Fractio 15894 FTMS; HC 135.43 722.41 SLC25A14

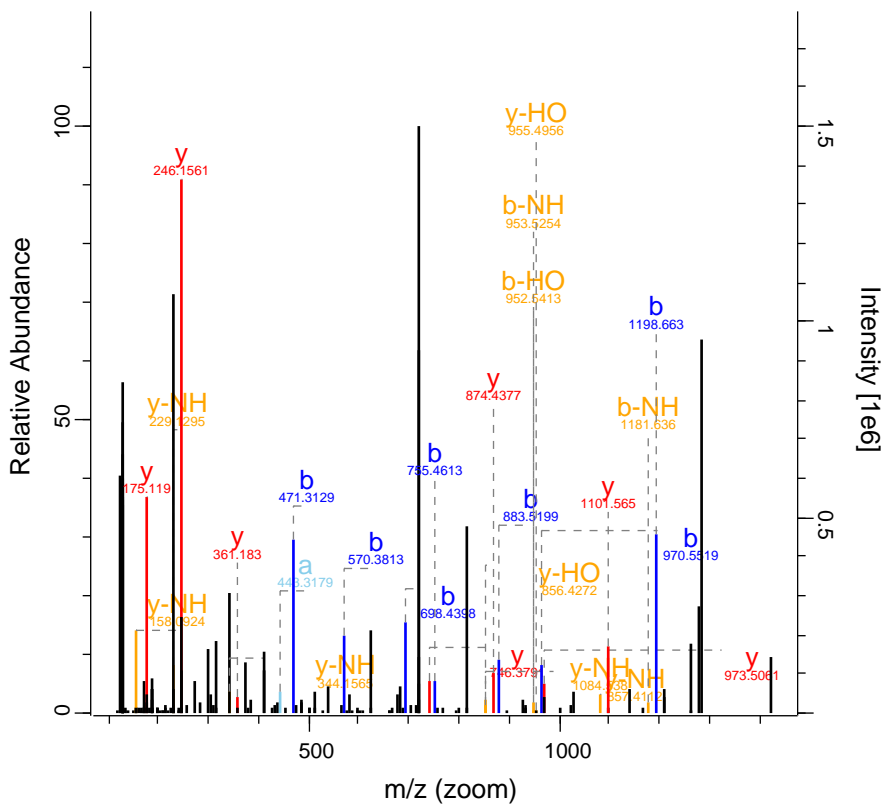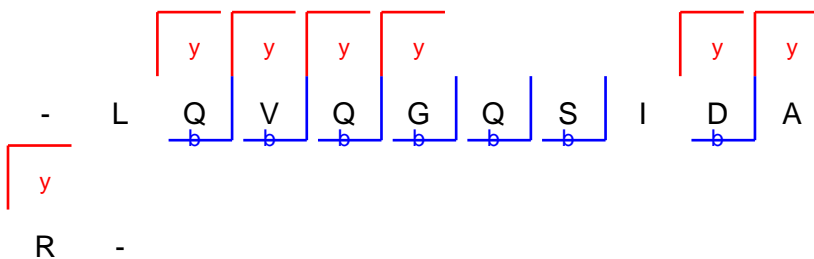

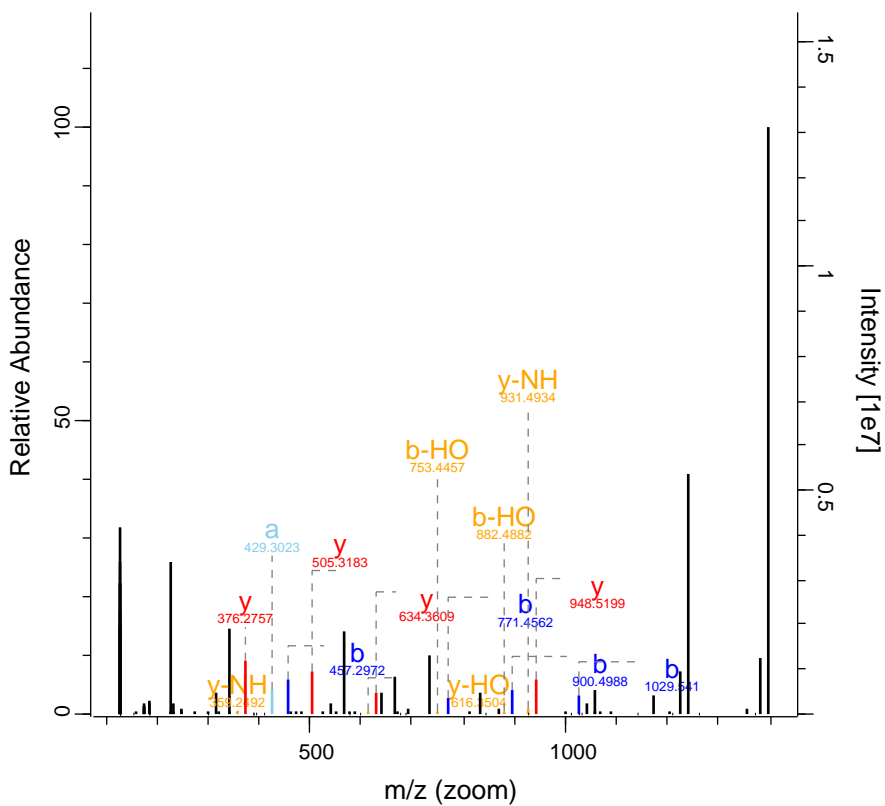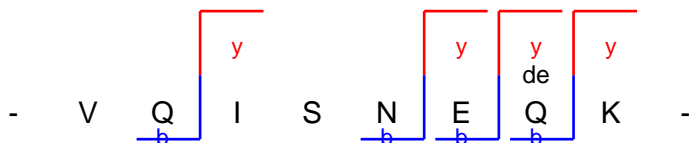

RO-QC-160121\_ZackD\_SS\_Set\_01\_Fractio 16225 FTMS; HC 103.22 745.39 HS6ST1

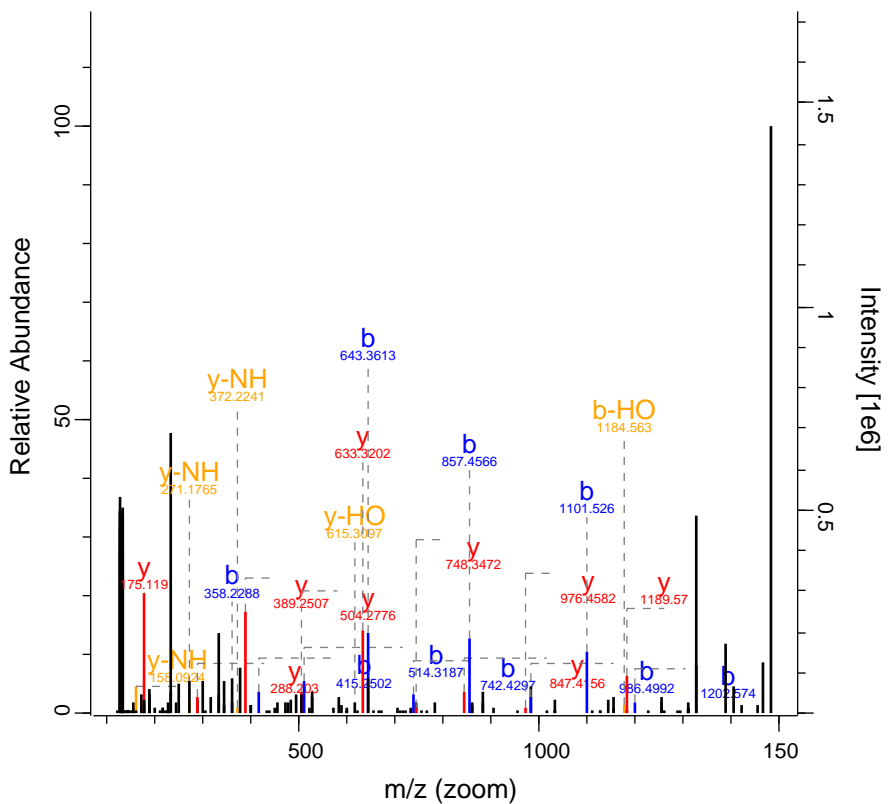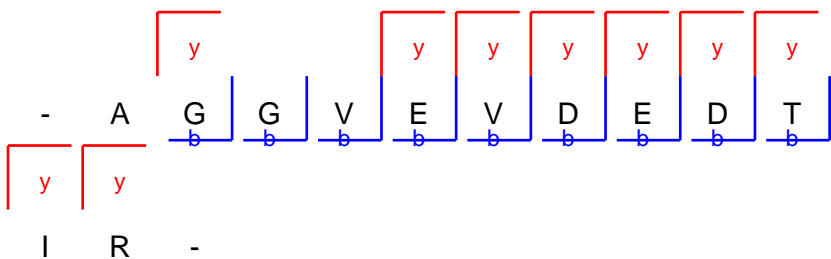



RO-QC-160121\_ZackD\_SS\_Set\_01\_Fraction\_2

17069 FTMS; HCD 46.35 967.95

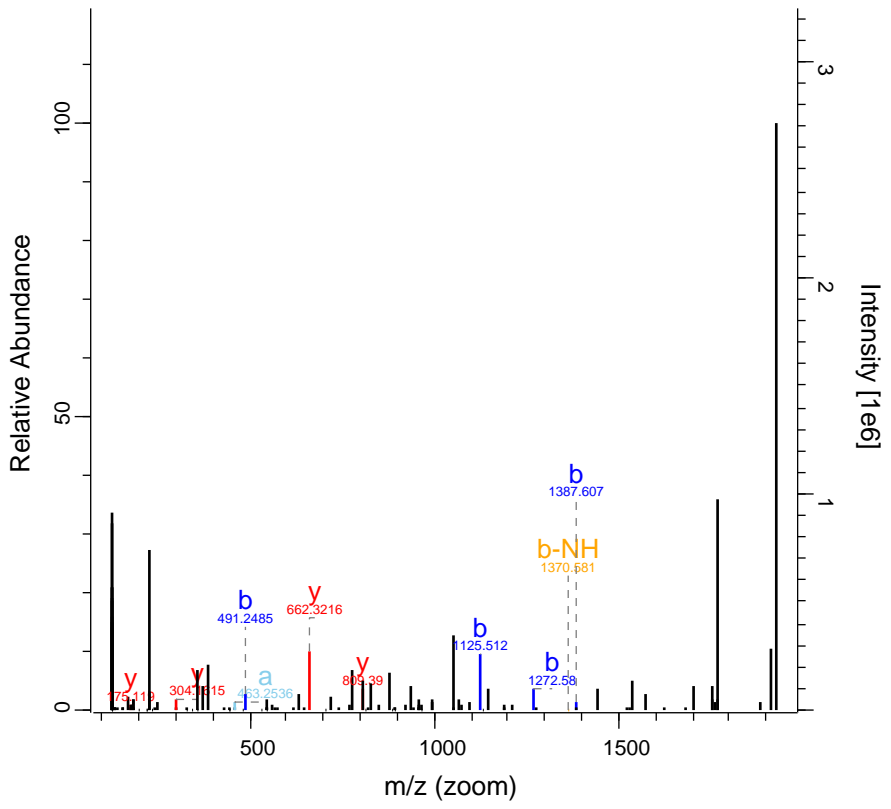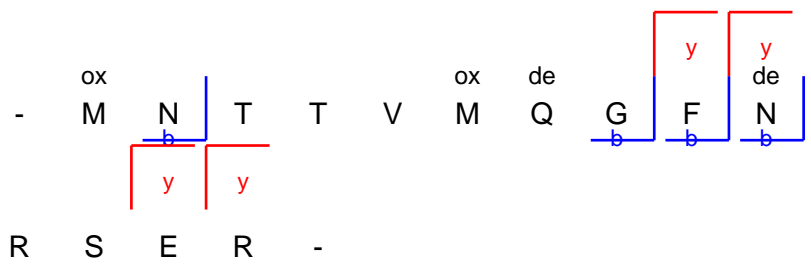

RO-QC-160121\_ZackD\_SS\_Set\_01\_Fractio 17170 FTMS; HC 103.34 763.95 FAAP100

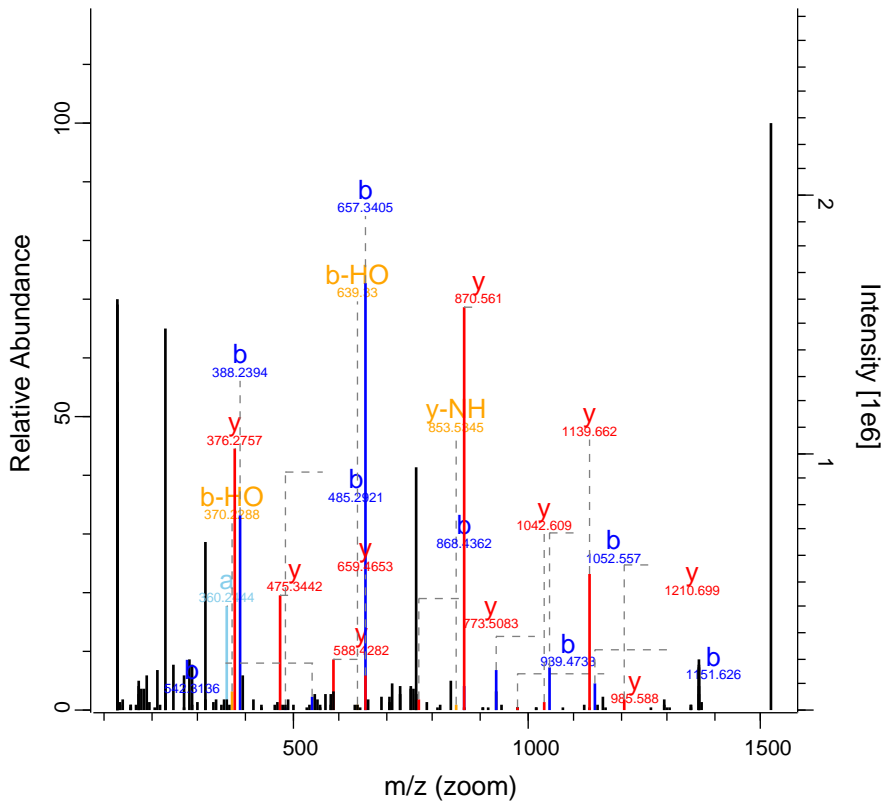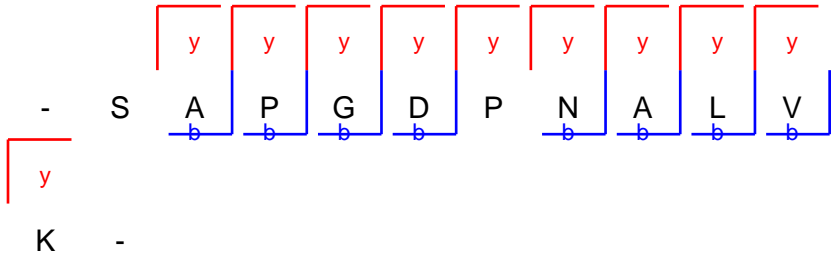

RO-QC-160121\_ZackD\_SS\_Set\_01\_Fractio 17801 FTMS; HC 143.42 827.42 IQCB1

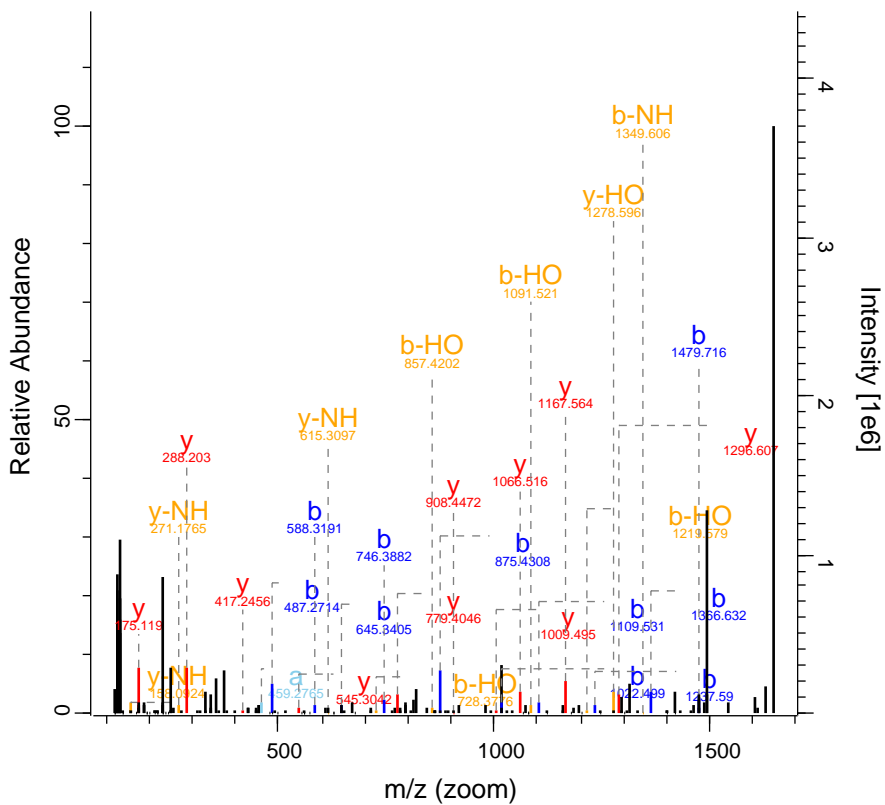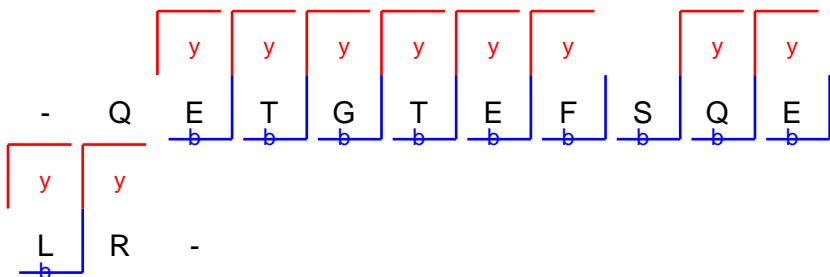

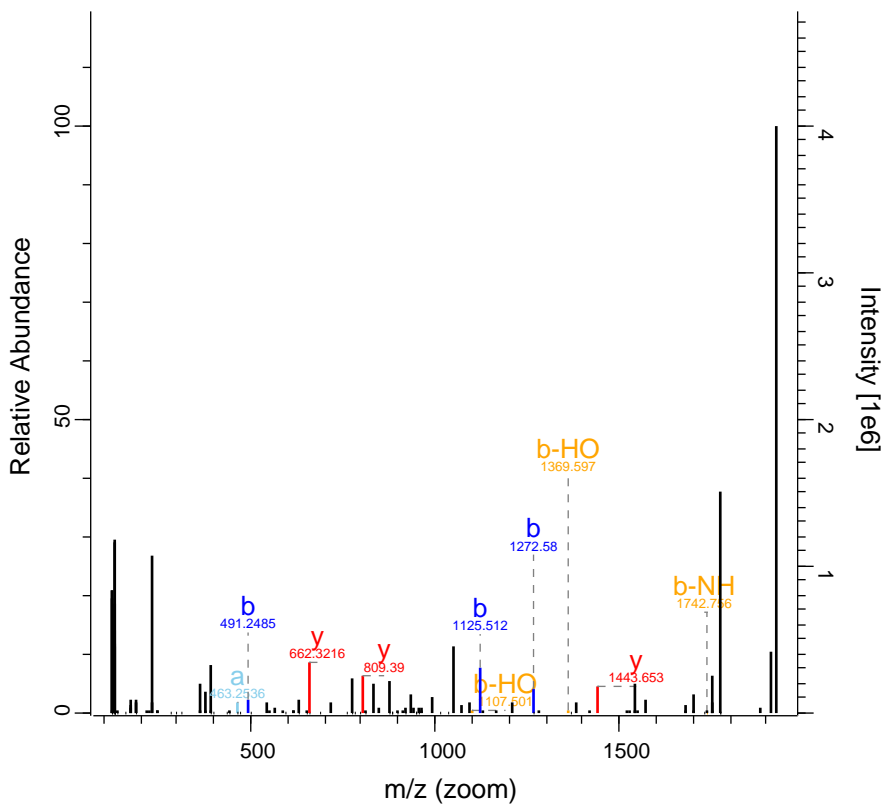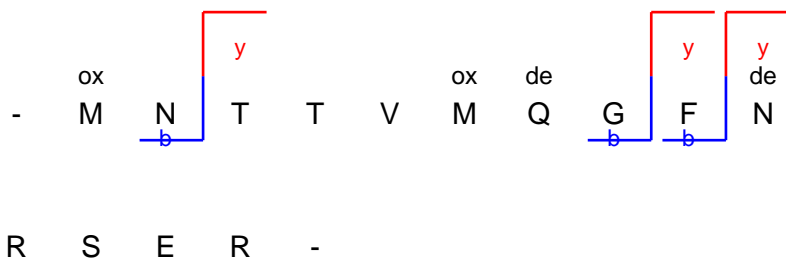

R S E R -

RO-QC-160121\_ZackD\_SS\_Set\_01\_Fractio 18367 FTMS; HC 114.89 688.41 PTPN21

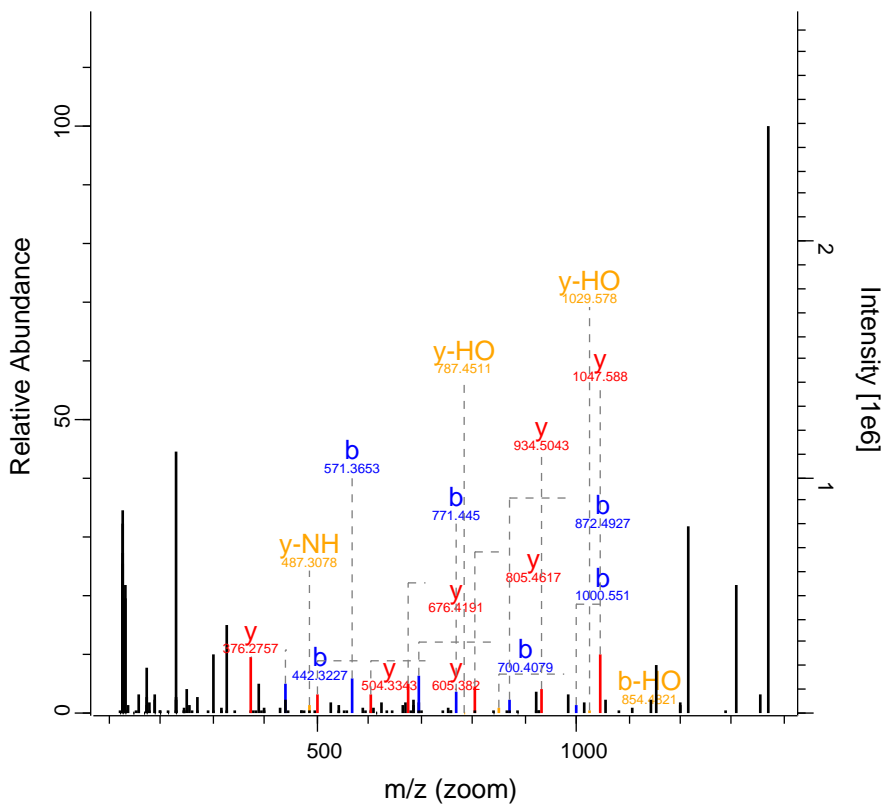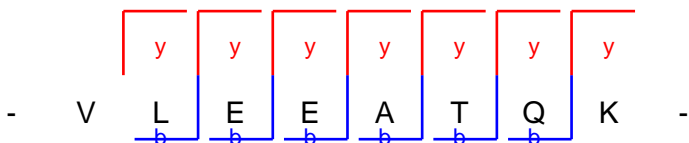

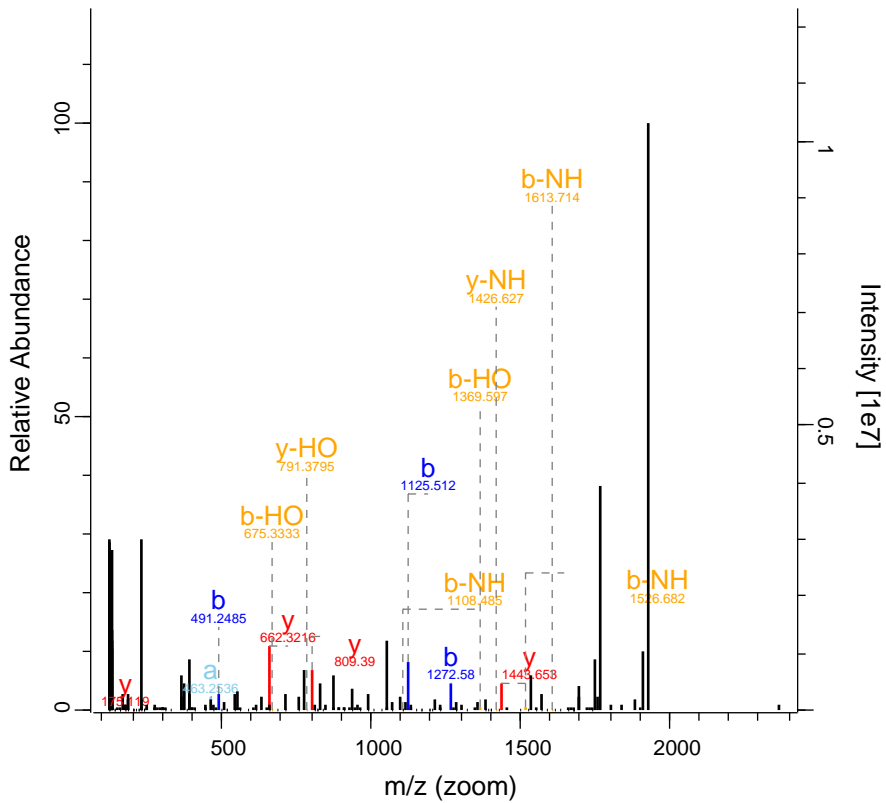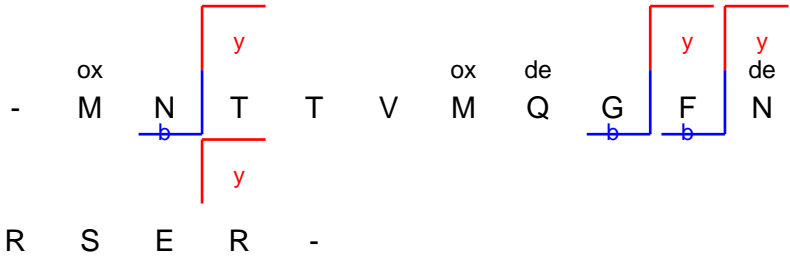

RO-QC-160121\_ZackD\_SS\_Set\_01\_Fraction 19014 FTMS; HC 77.19 799.77 ATP6V0C

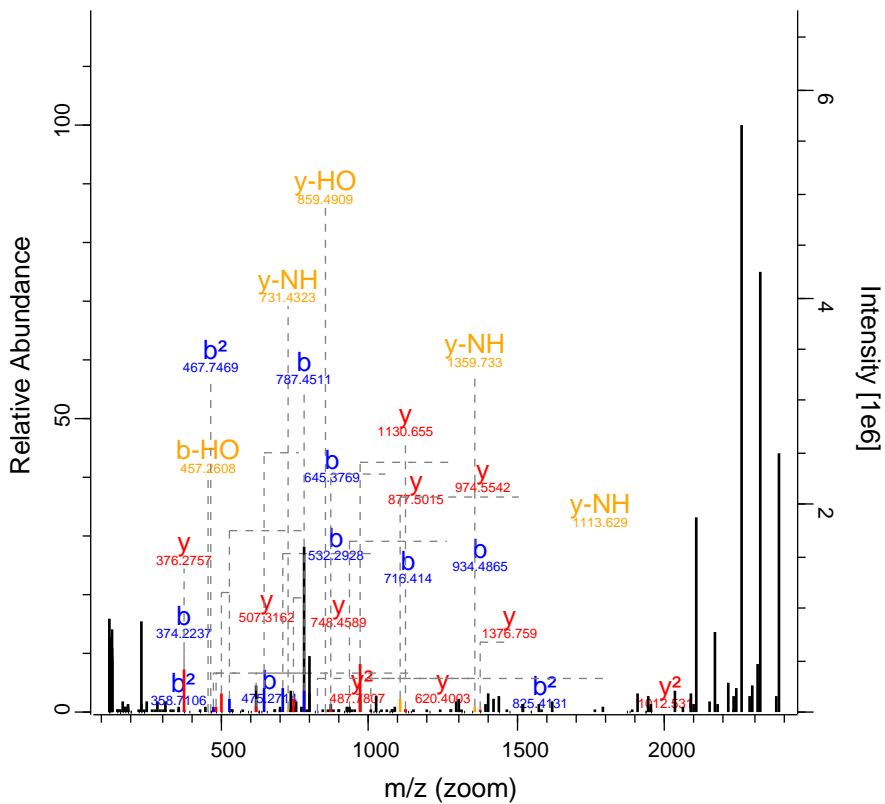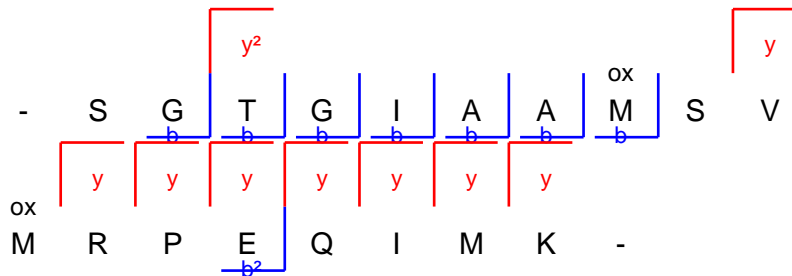

RO-QC-160121\_ZackD\_SS\_Set\_01\_Fraction19264 FTMS; HCl154.77 800.1 ATP6V0C

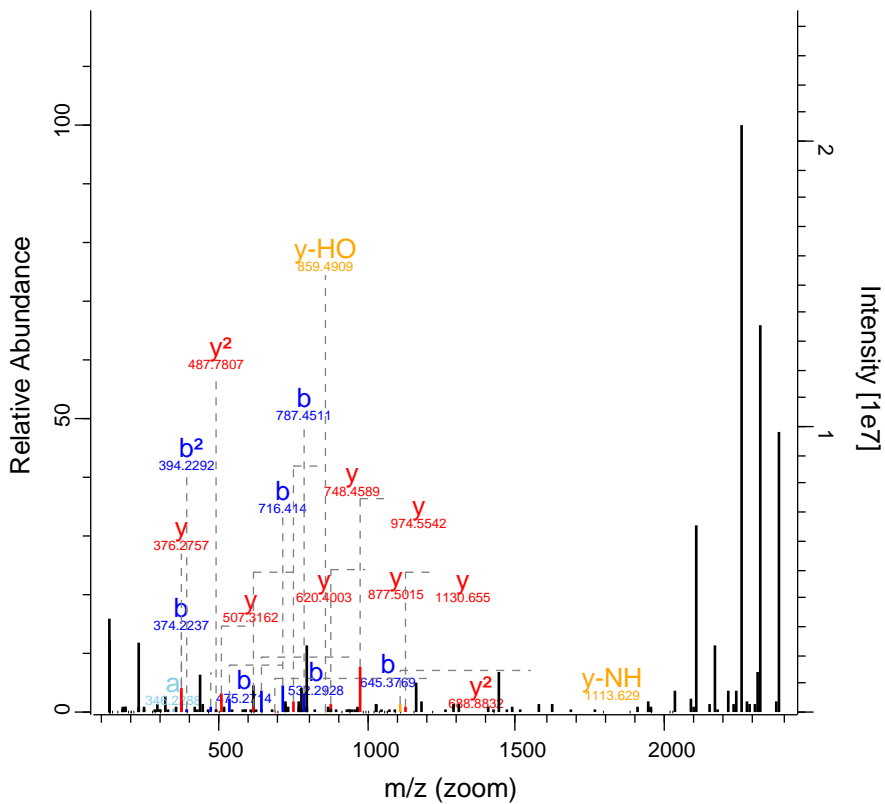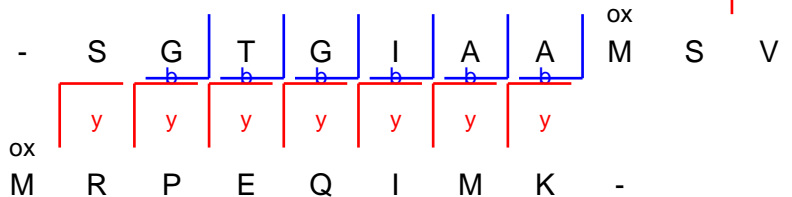



RO-QC-160121\_ZackD\_SS\_Set\_01\_Fraction 19358 FTMS; HC 89.08 661.37 ABHD13

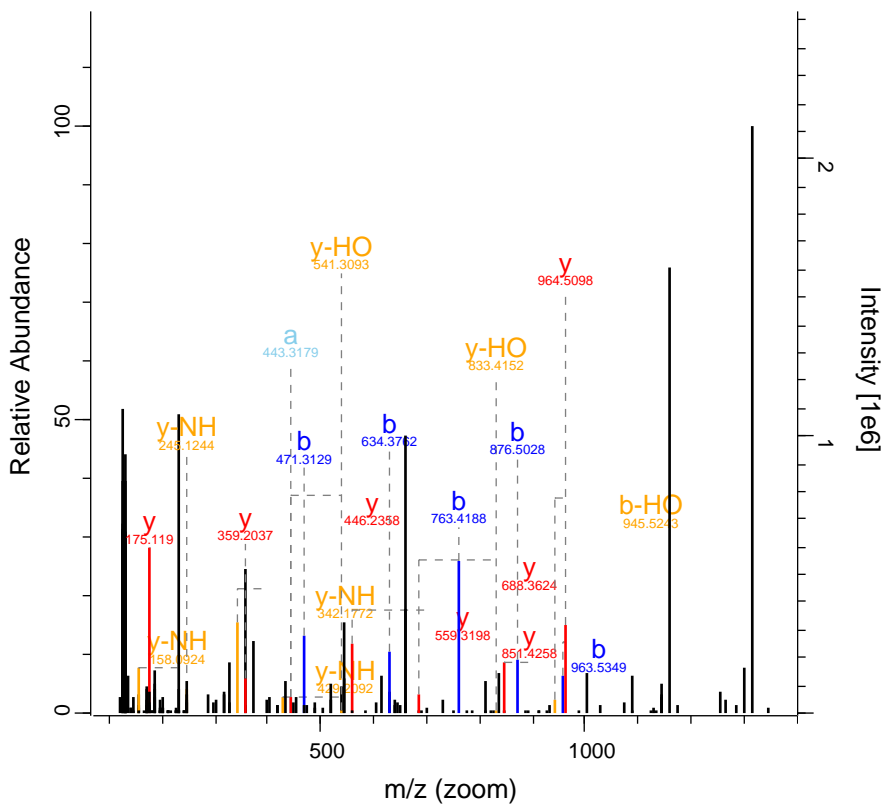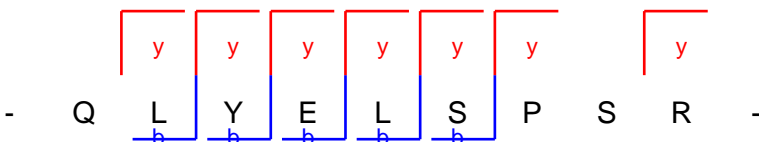

RO-QC-160121\_ZackD\_SS\_Set\_01\_Fractio 19686 FTMS; HC 110.61 578.31 BNIP3L

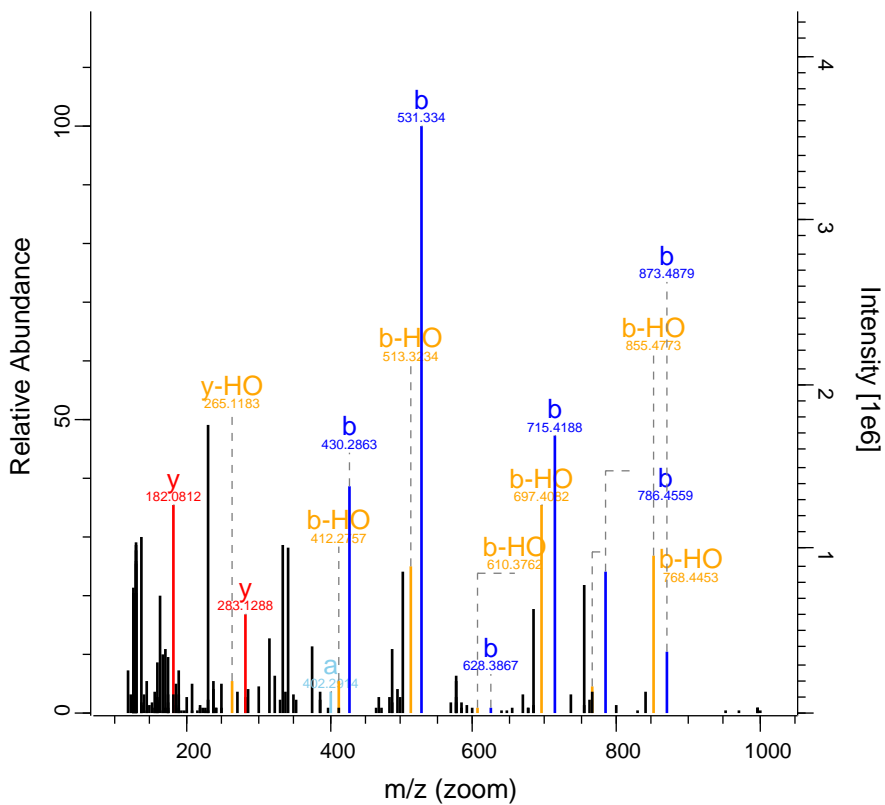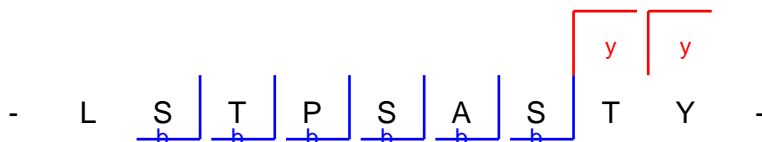

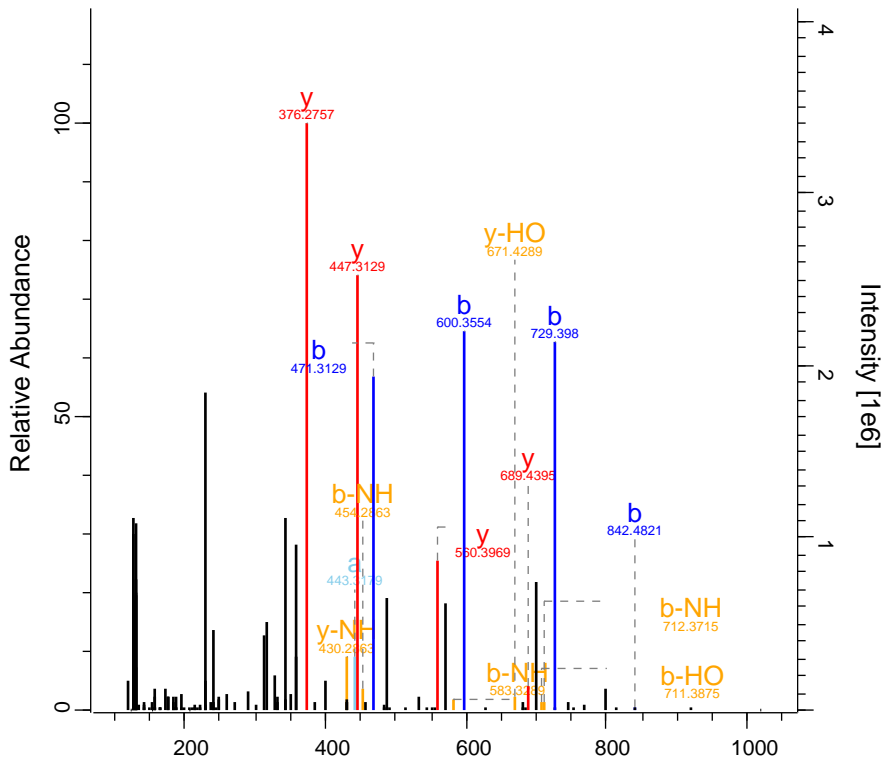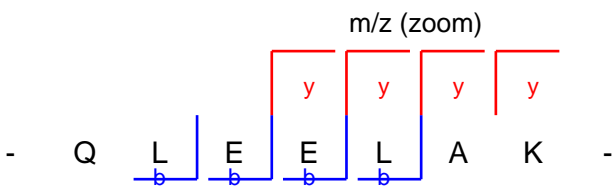

RO-QC-160121\_ZackD\_SS\_Set\_01\_Fractic 20785 FTMS; HC 40.49 1015.84 DCST1

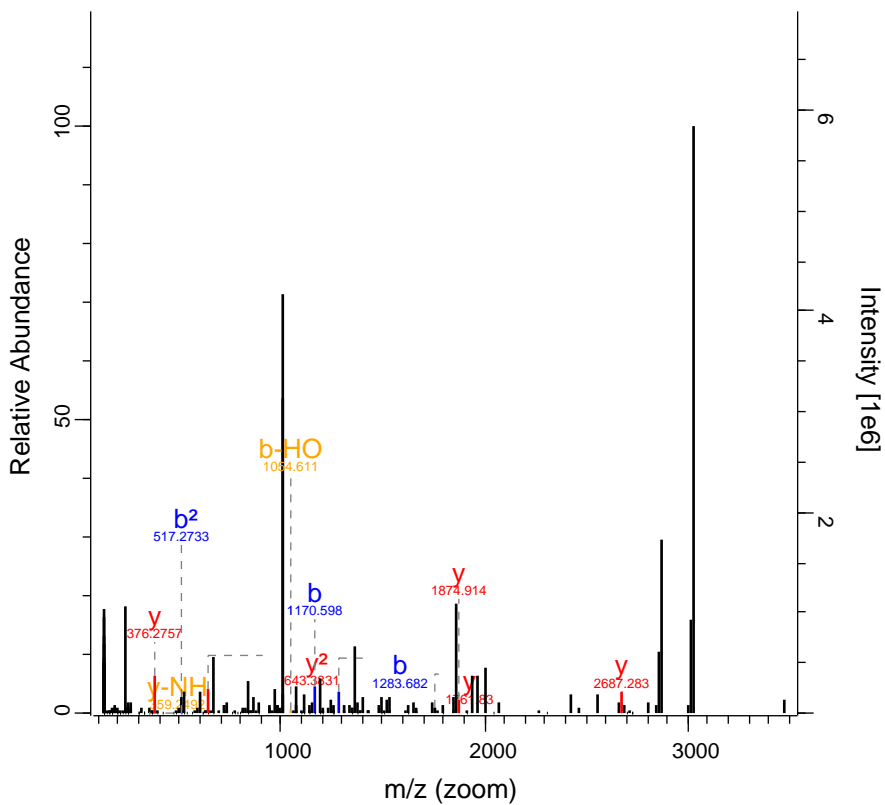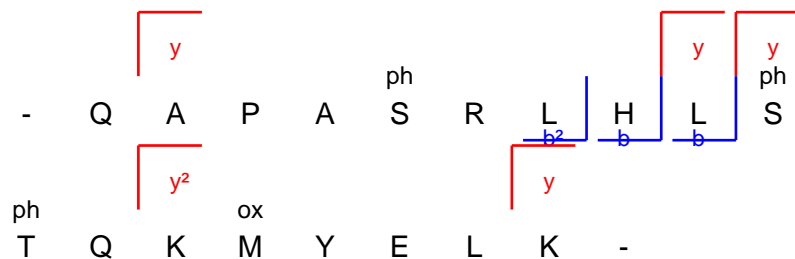

RO-QC-160121\_ZackD\_SS\_Set\_01\_Fraction 22837 FTMS; HC 69.1 551.33 YBEY

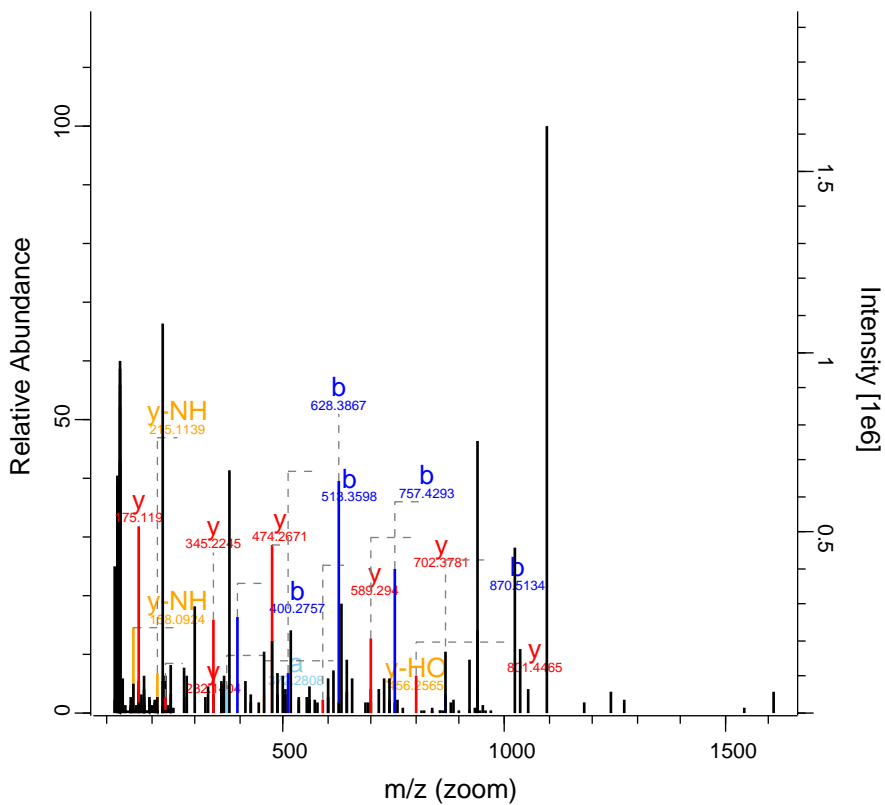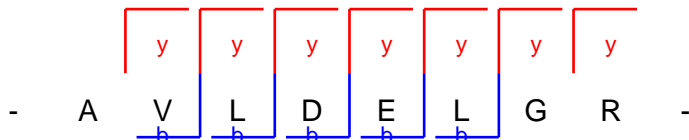

RO-QC-160121\_ZackD\_SS\_Set\_01\_Fractic 23074 FTMS; HC 124.86 1086.52 HIGD1A

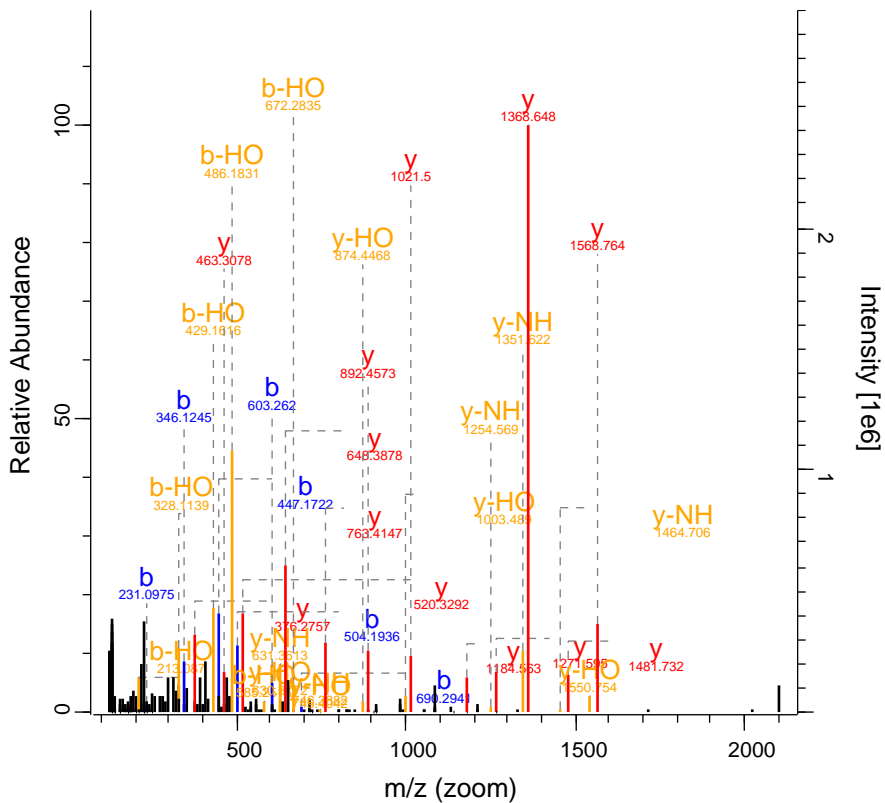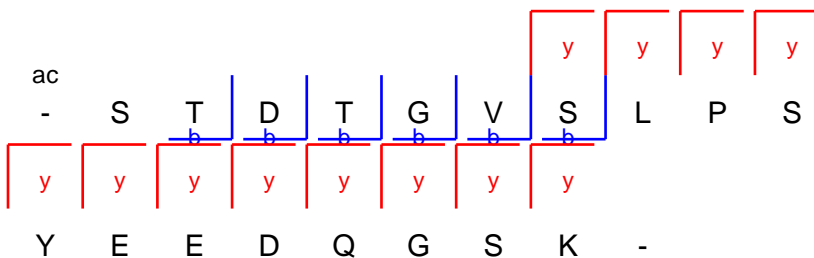

RO-QC-160121\_ZackD\_SS\_Set\_01\_Fraction 23118 FTMS; HC 93.75 724.68 HIGD1A

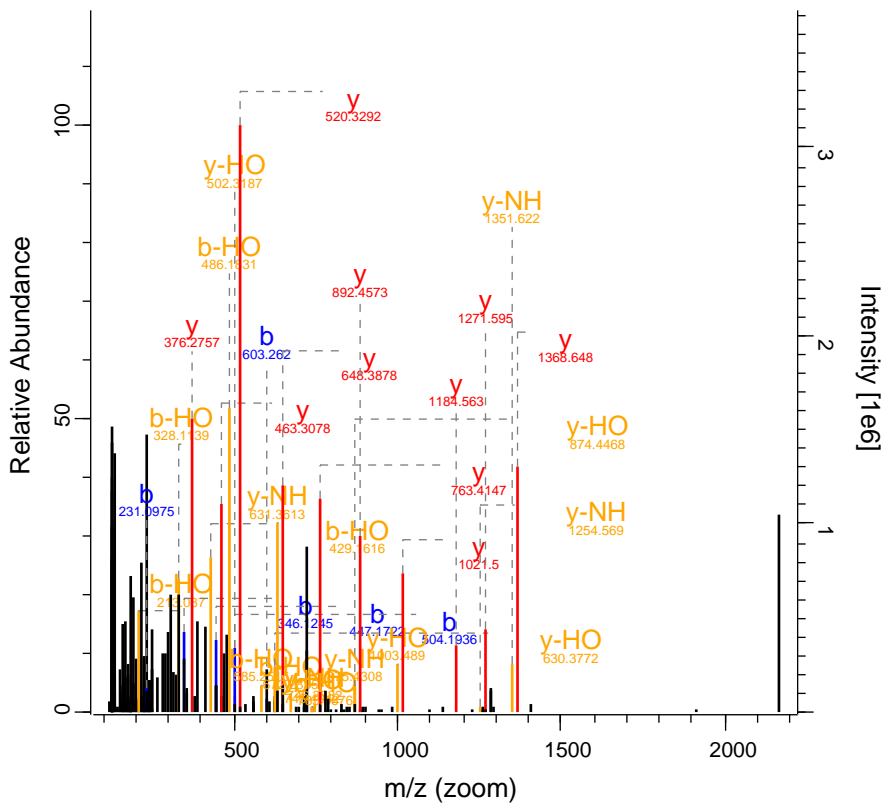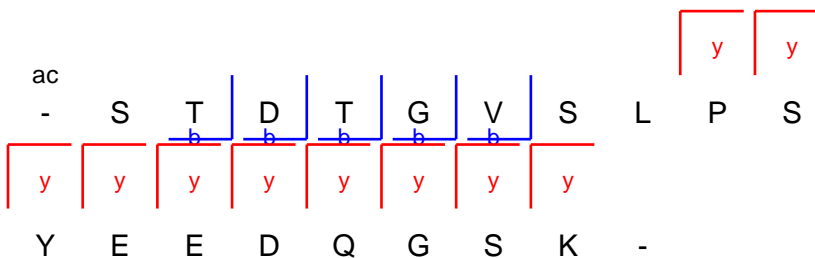

RO-QC-160121\_ZackD\_SS\_Set\_01\_Fractio 23283 FTMS; HC 105.94 611.84 ALG14

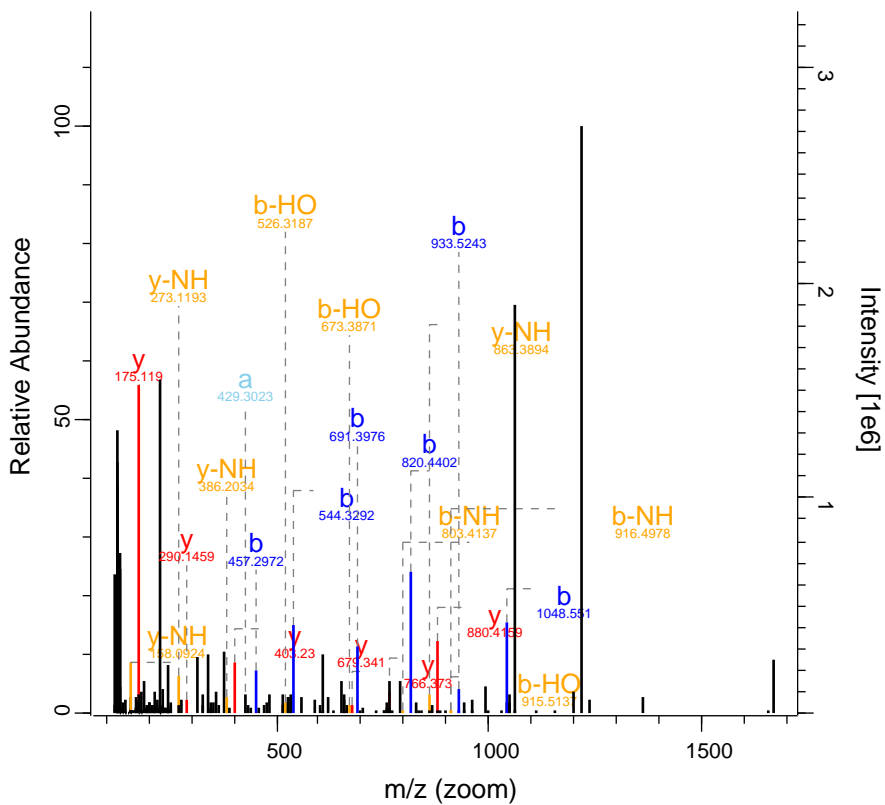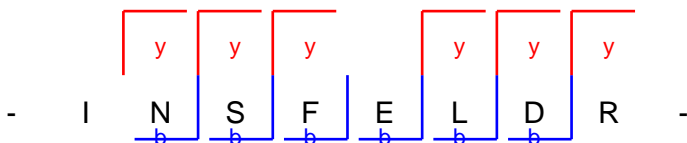



RO-QC-160121\_ZackD\_SS\_Set\_01\_Fractic 23308 FTMS; HC 125.28 1086.52 HIGD1A

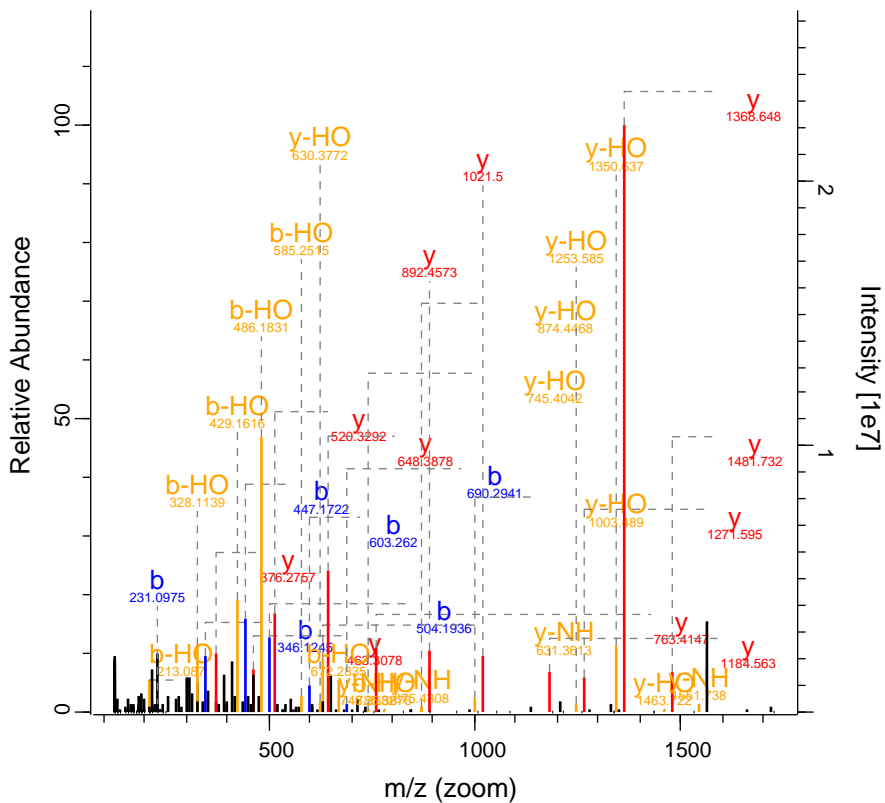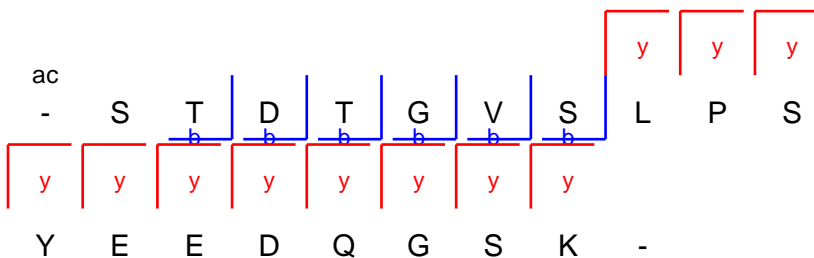

RO-QC-160121\_ZackD\_SS\_Set\_01\_Fraction 23365 FTMS; HC 99.45 724.68 HIGD1A

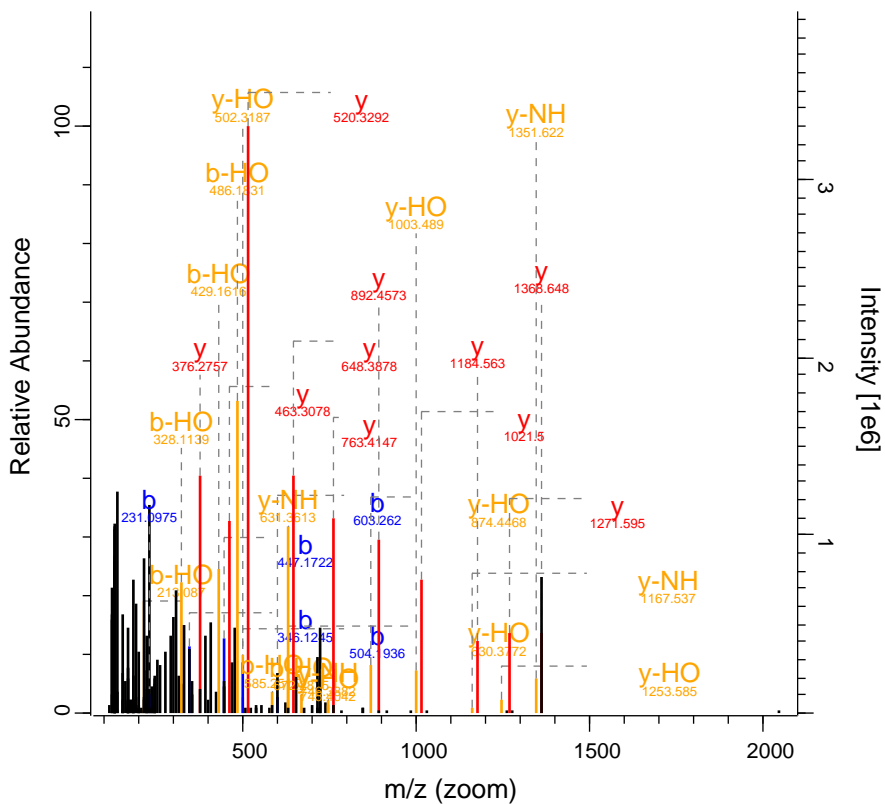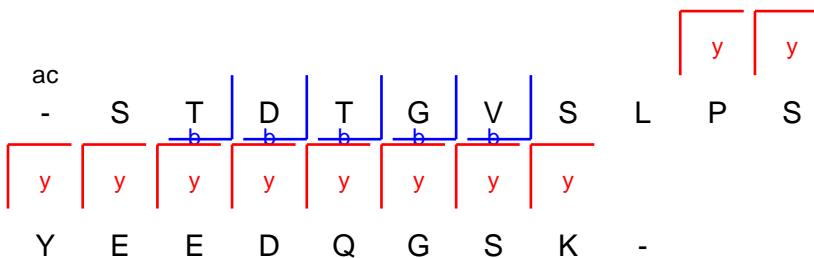

RO-QC-160121\_ZackD\_SS\_Set\_01\_Fractic 23487 FTMS; HC 55.23 1086.19 SLX4

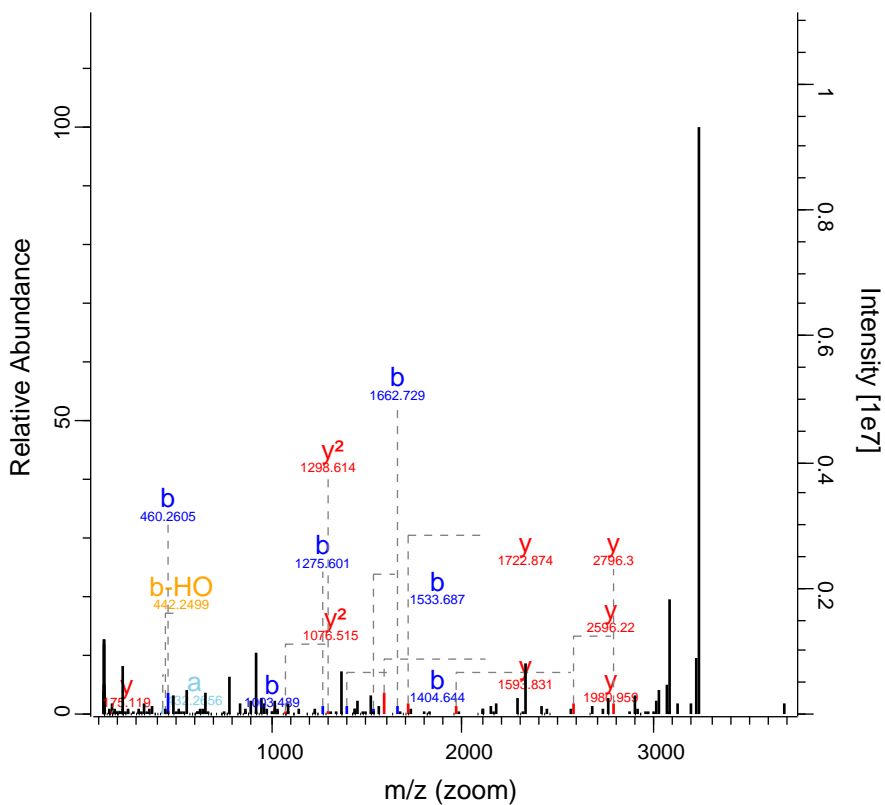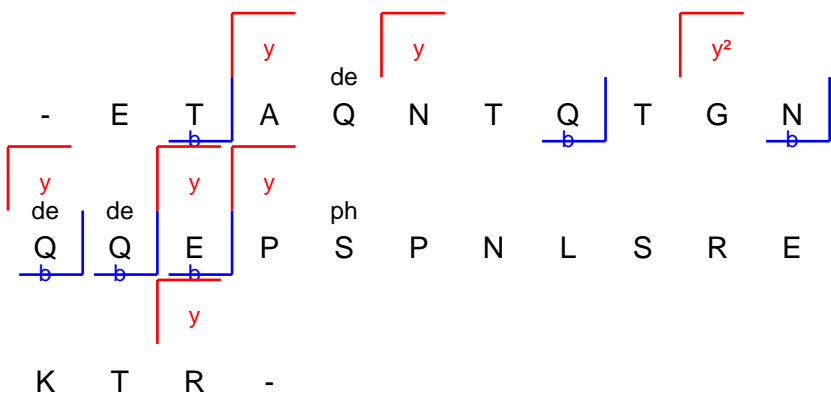

RO-QC-160121\_ZackD\_SS\_Set\_01\_Fraction 23839 FTMS; HCl 133.71 858.5 TINF2

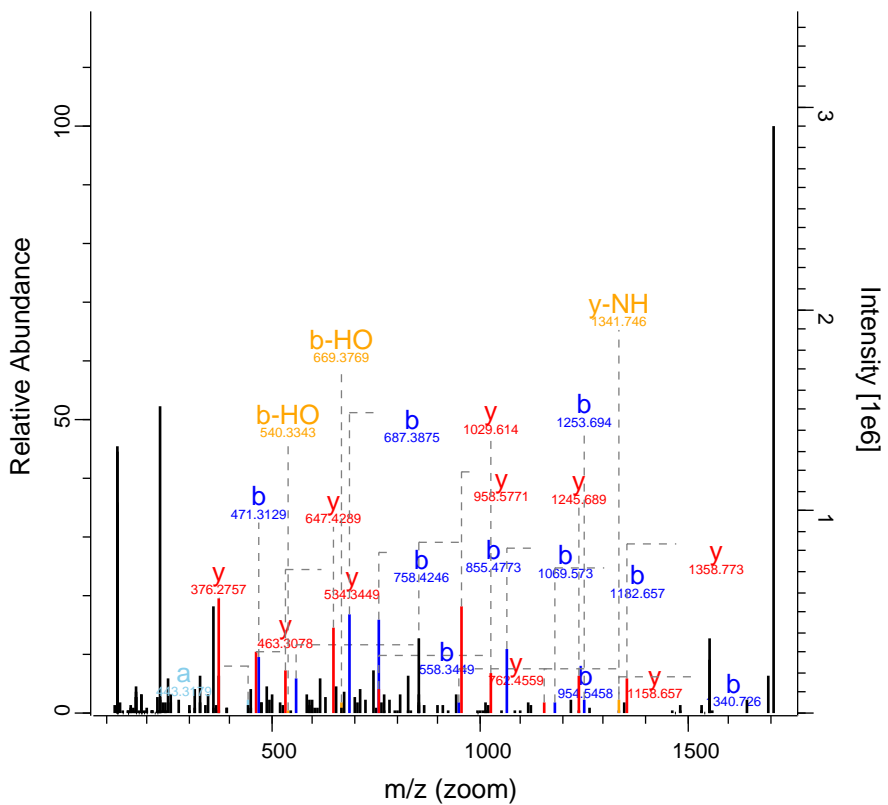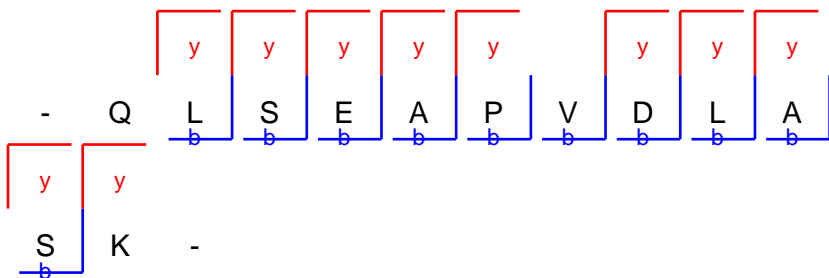

RO-QC-160121\_ZackD\_SS\_Set\_01\_Fraccio 24136 FTMS; HC 136.48 803.45 ATXN7L3B

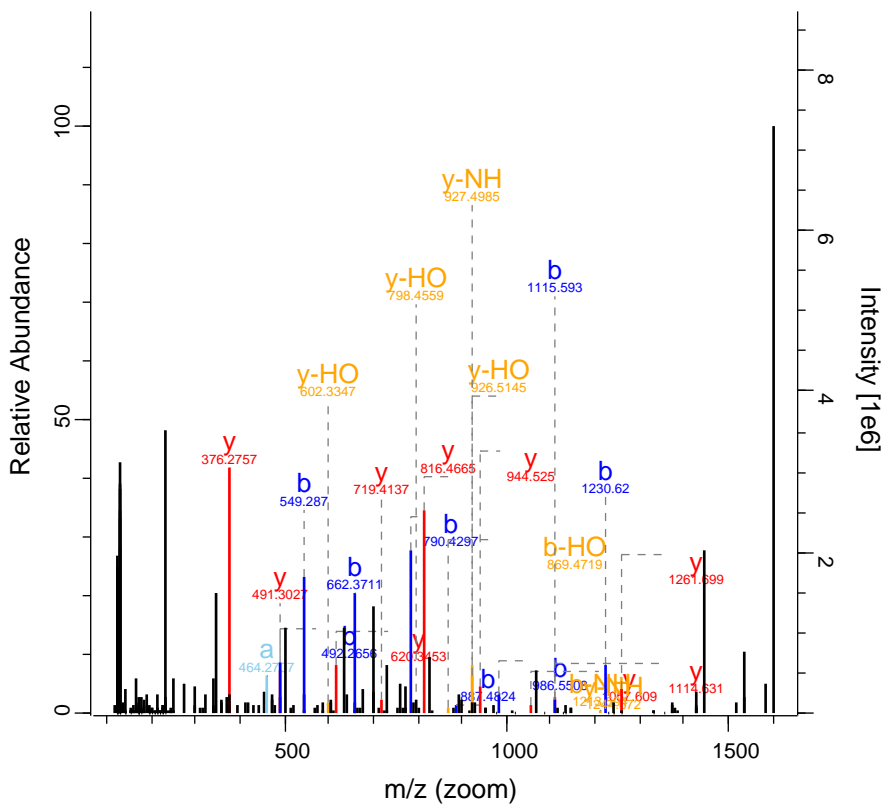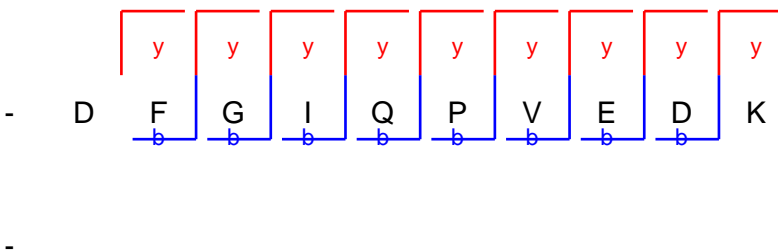

RO-QC-160121\_ZackD\_SS\_Set\_01\_Fract 24430 FTMS; HC 127.56 697.9 FAM133B;FAM133

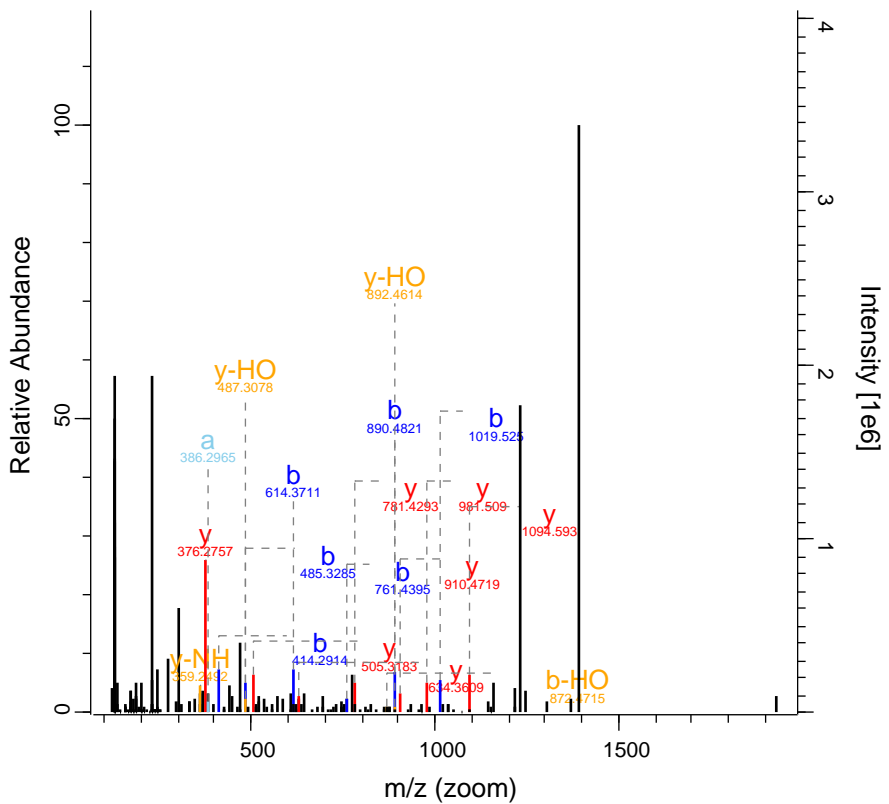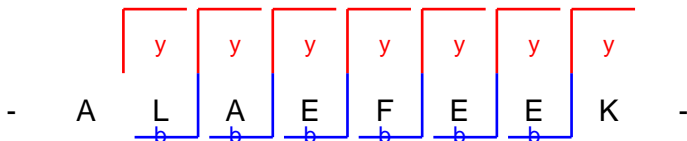

| Raw File                                | Scan  | Method    | Score | m/z    |
|-----------------------------------------|-------|-----------|-------|--------|
| RO-QC-160121_ZackD_SS_Set_01_Fraction_2 | 24903 | FTMS; HCD | 43.25 | 470.94 |

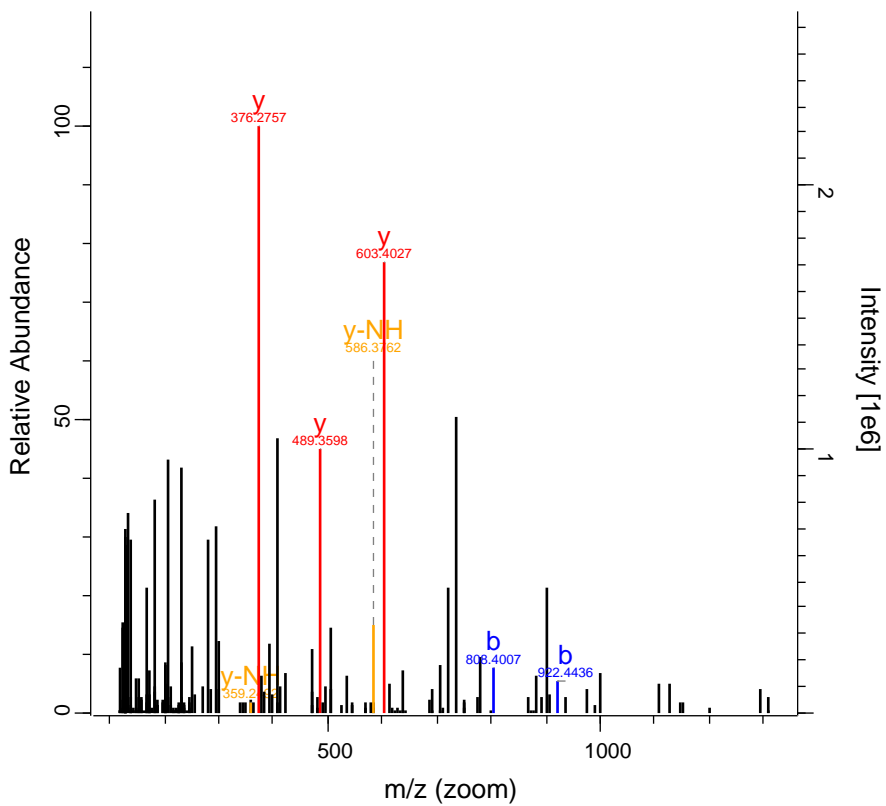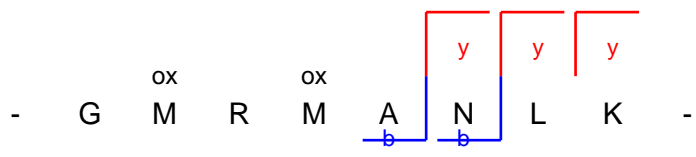

RO-QC-160121\_ZackD\_SS\_Set\_01\_Fraction 26075 FTMS; HC 112.5 756.06 DCAF16

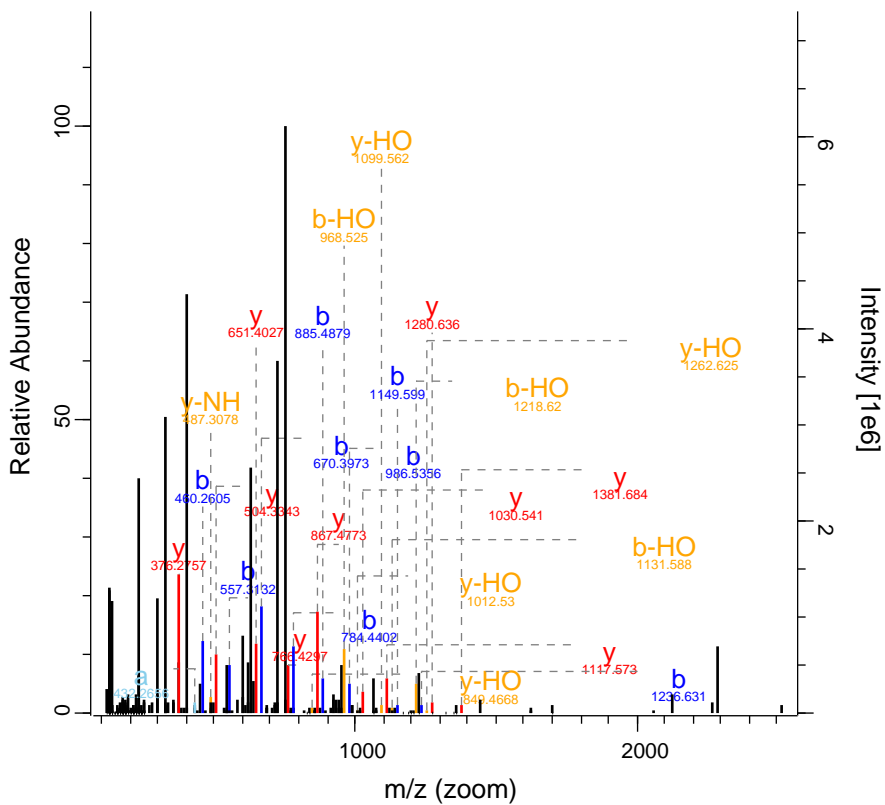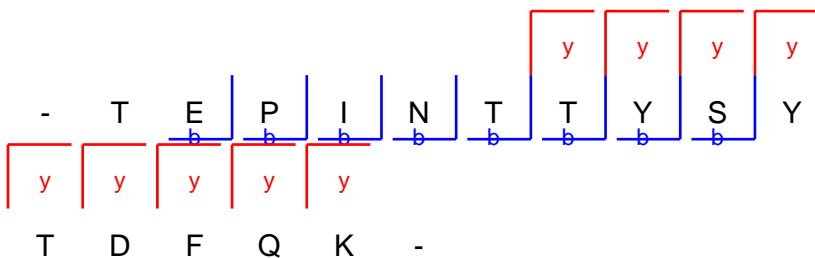



RO-QC-160121\_ZackD\_SS\_Set\_01\_Fraction 26838 FTMS; HC 114.4 692.41 PMF1

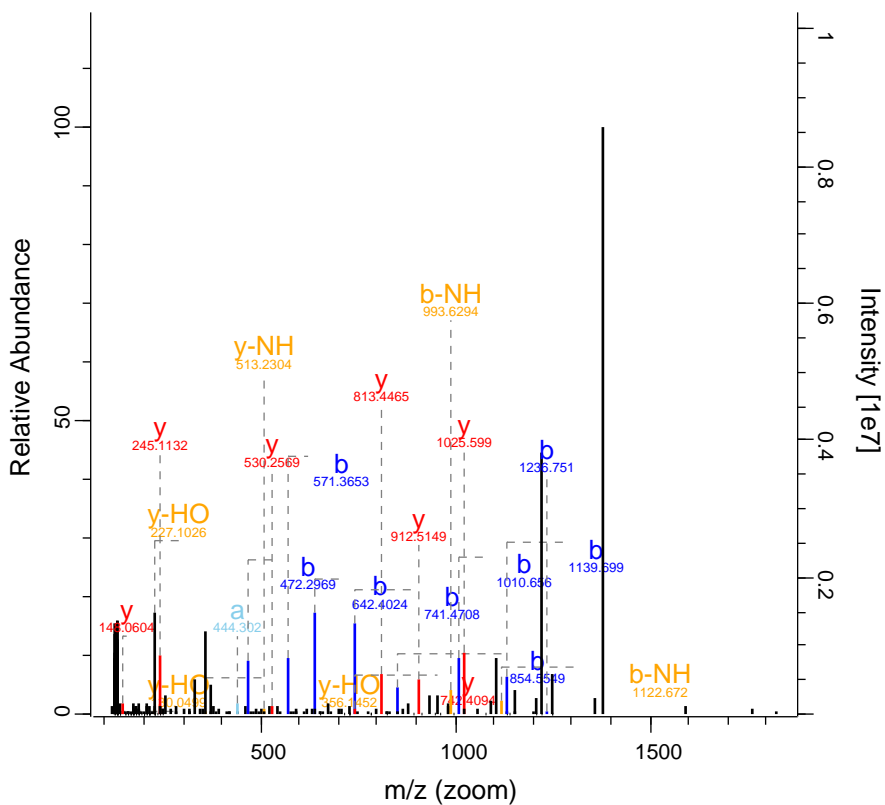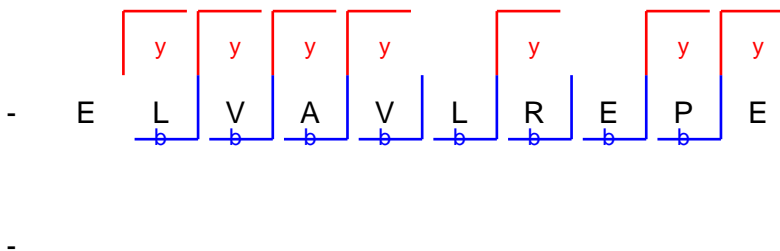

RO-QC-160121\_ZackD\_SS\_Set\_01\_Fractio 26946 FTMS; HC 130.87 882.79 ERCC6L

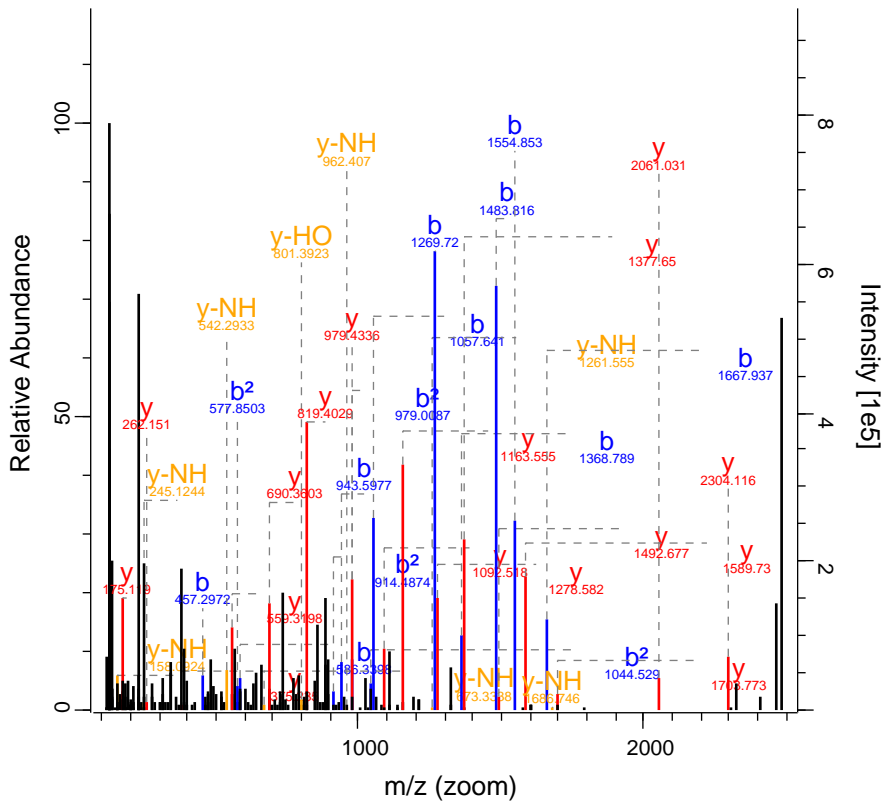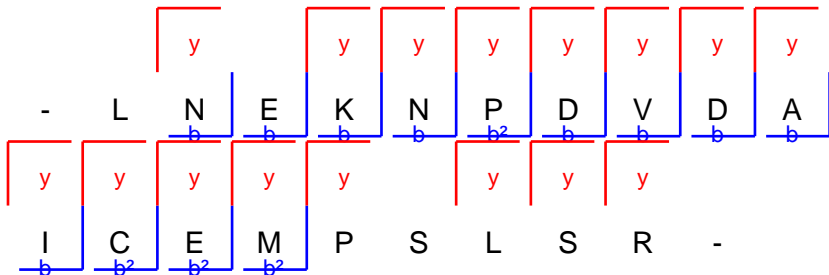

RO-QC-160121\_ZackD\_SS\_Set\_01\_Fraction 27497 FTMS; HC 54.78 554.81 ADAMDEC1

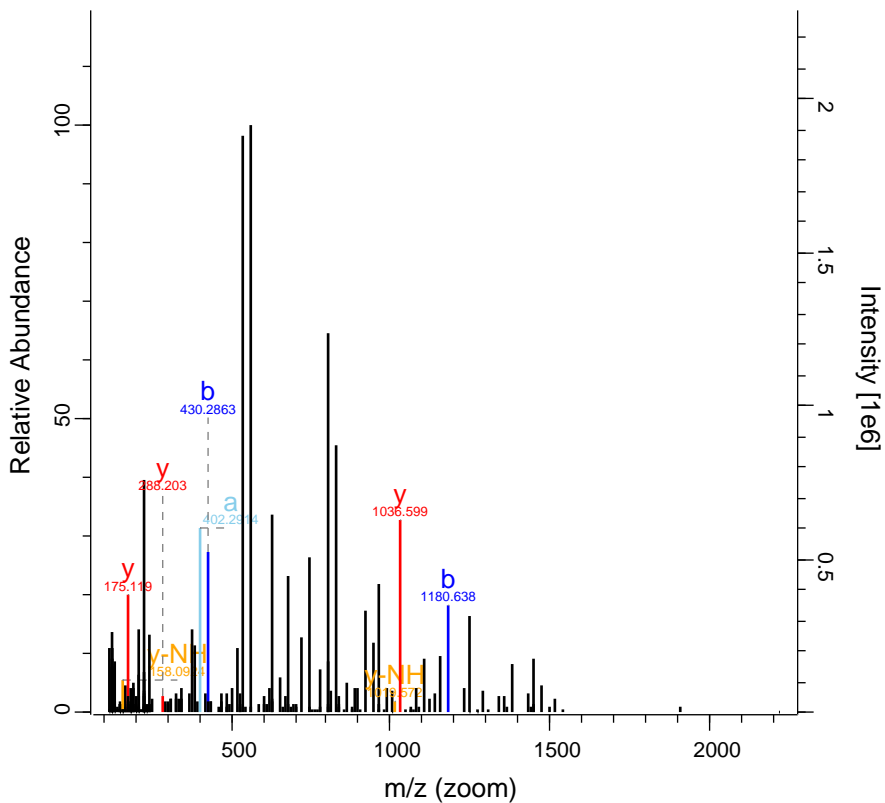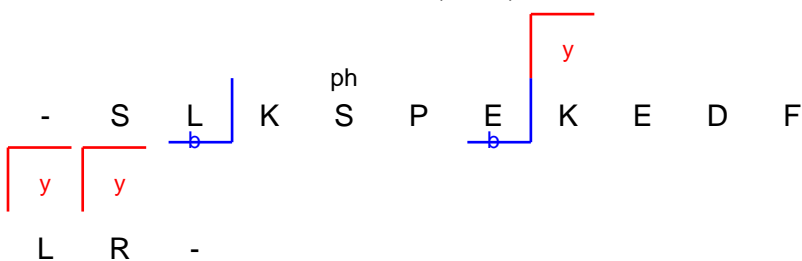

RO-QC-160121\_ZackD\_SS\_Set\_01\_Fractic 27934 FTMS; HC 293.35 1249.68 EVA1B

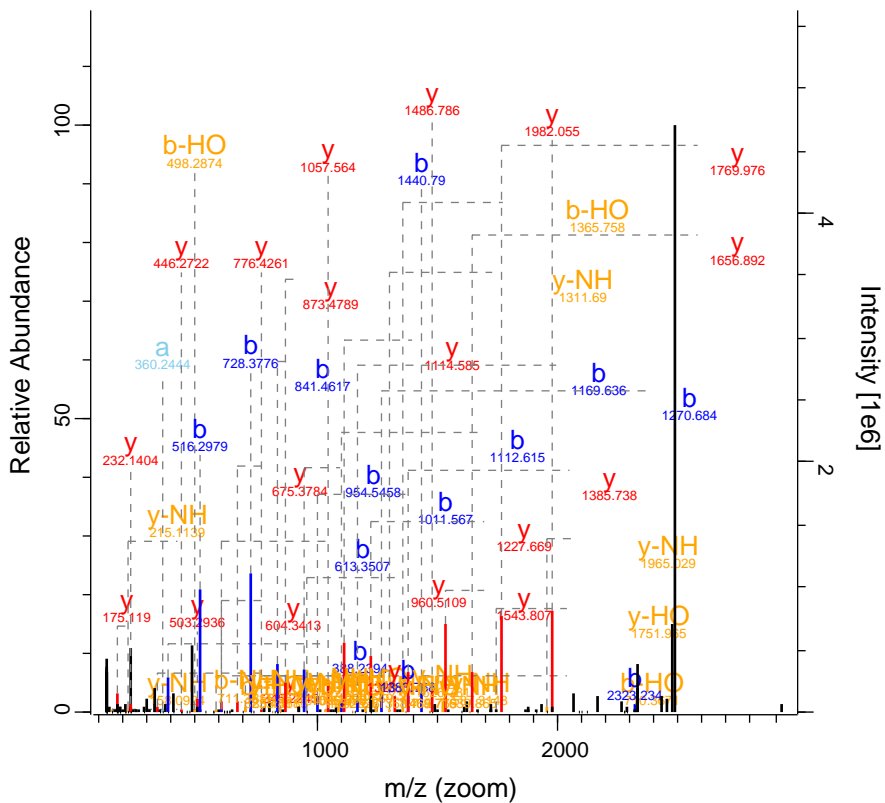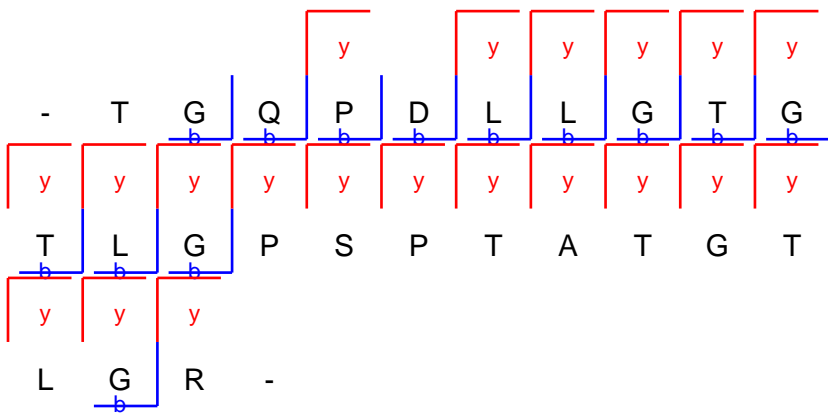

RO-QC-160121\_ZackD\_SS\_Set\_01\_Fractic 28045 FTMS; HC 220.53 1037.59 NACA2

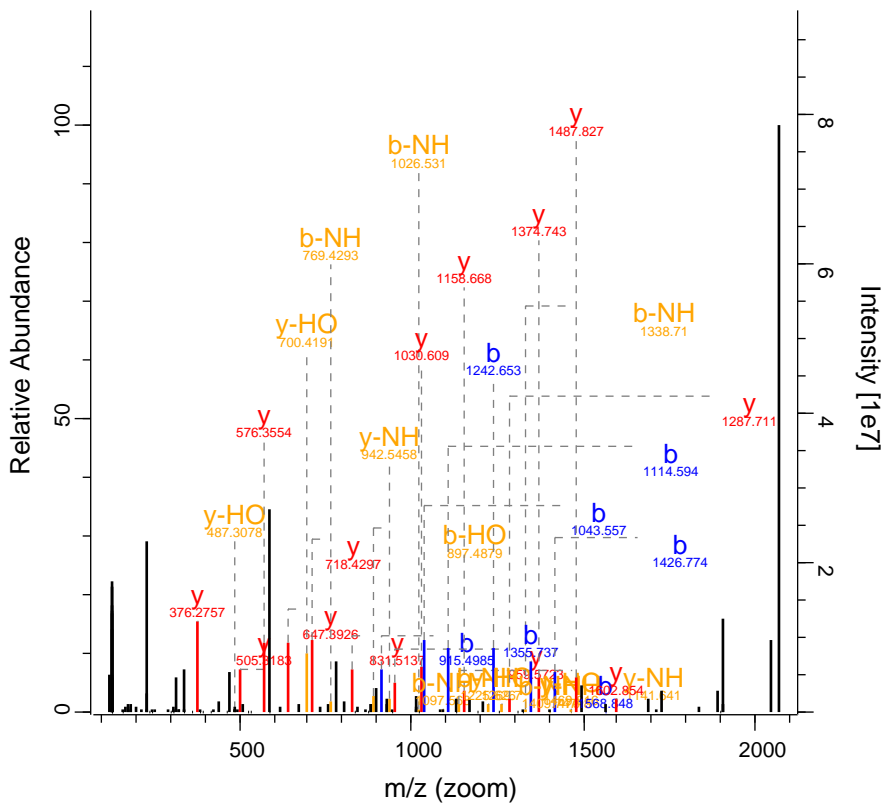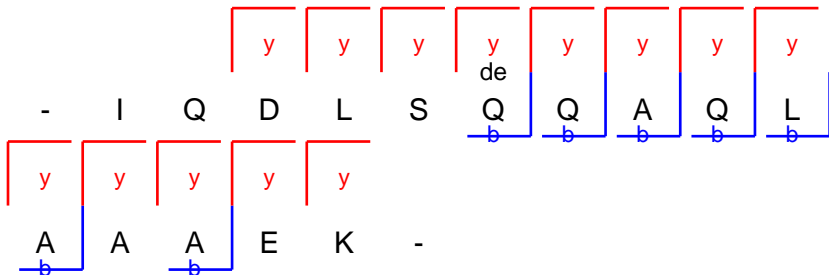

RO-QC-160121\_ZackD\_SS\_Set\_01\_Fractio 28276 FTMS; HC 122.77 935.48 SOCS6

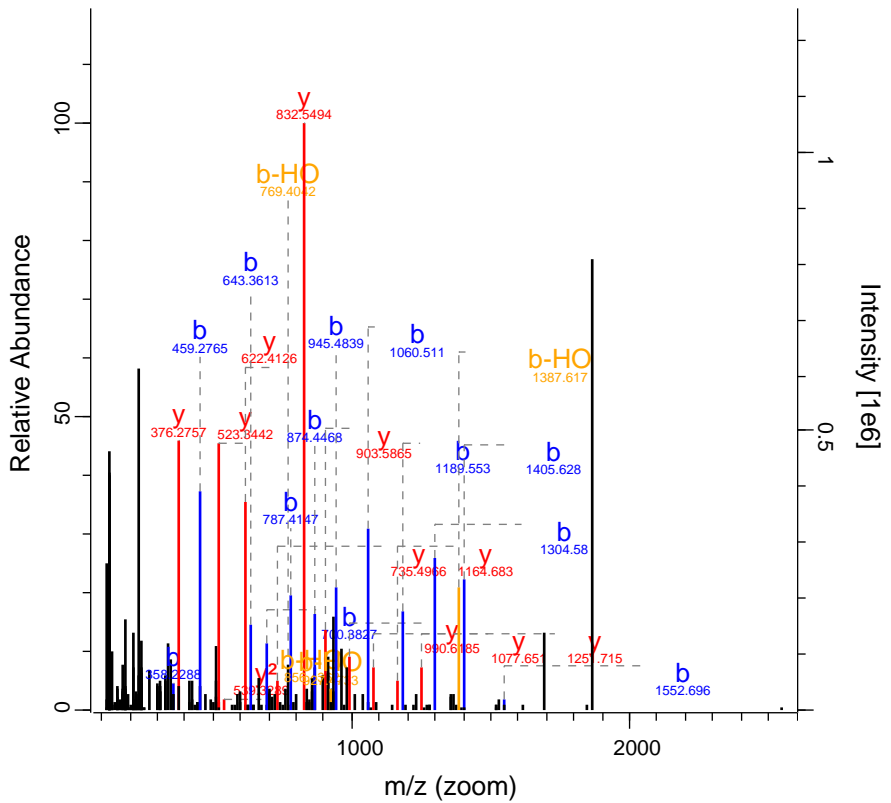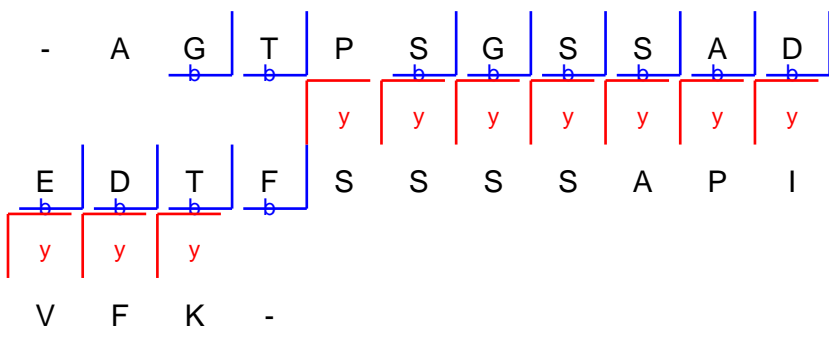

RO-QC-160121\_ZackD\_SS\_Set\_01\_Fractio 28439 FTMS; HC 155.97 500.62 C1orf122

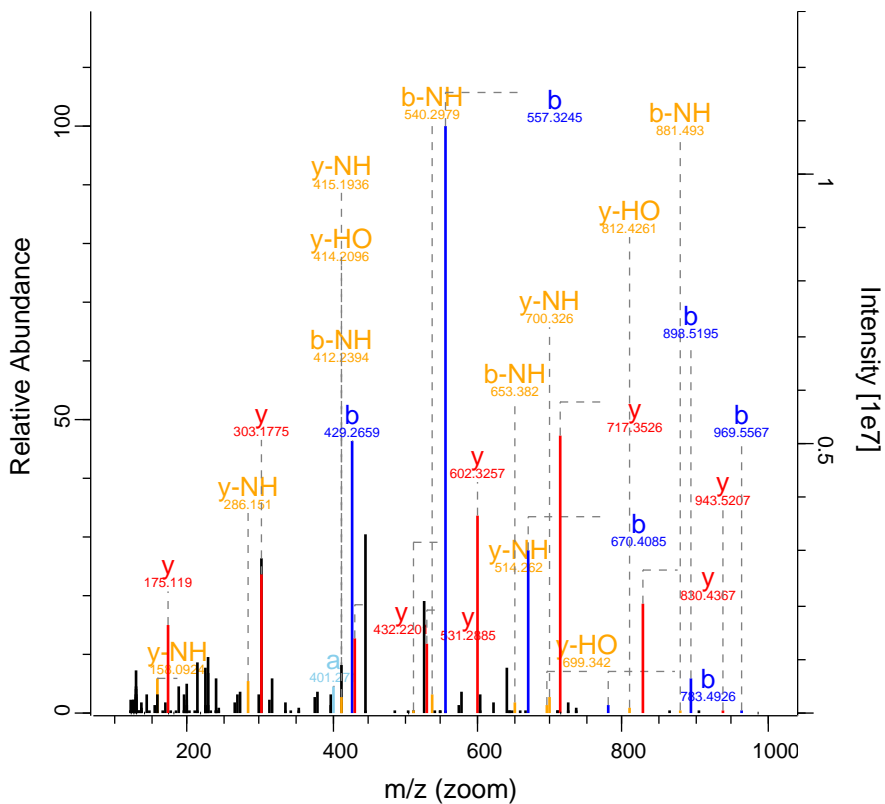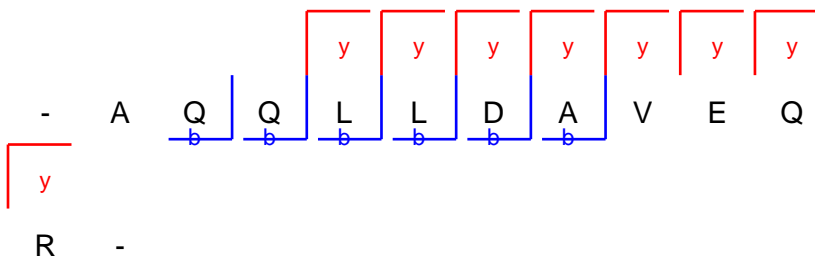

RO-QC-160121\_ZackD\_SS\_Set\_01\_Fractio 28539 FTMS; HC 189.58 750.42 C1orf122

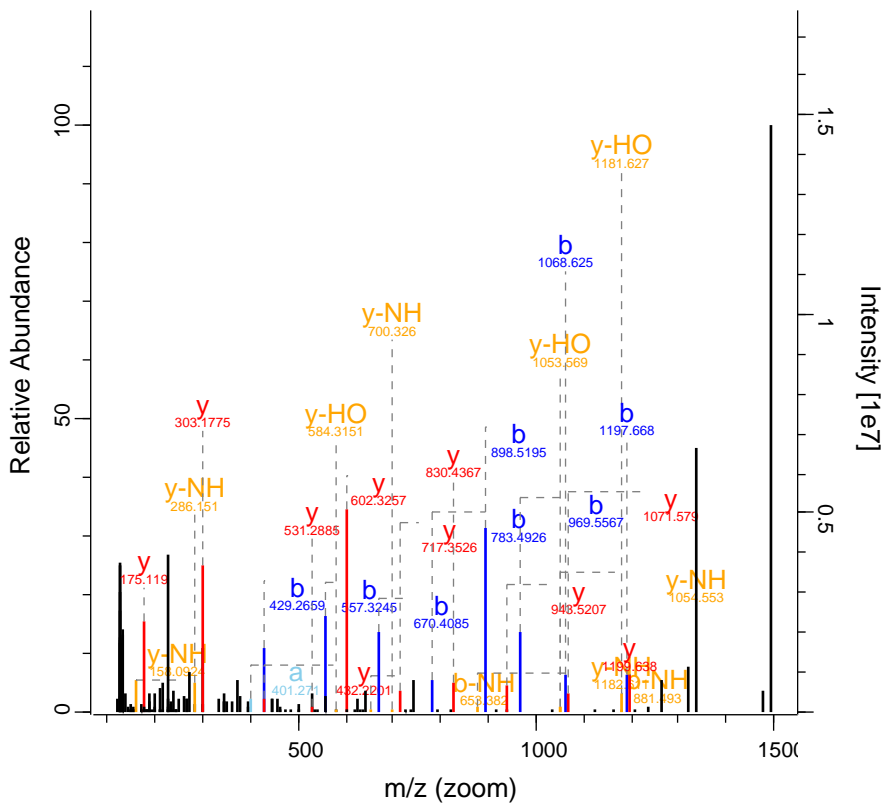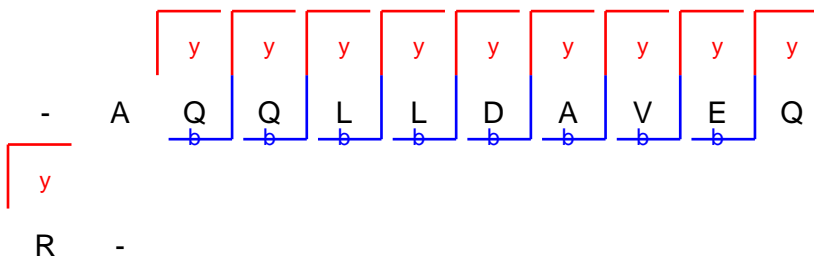



RO-QC-160121\_ZackD\_SS\_Set\_01\_Fractic 28599 FTMS; HC 97.49 1027.19 PTOV1

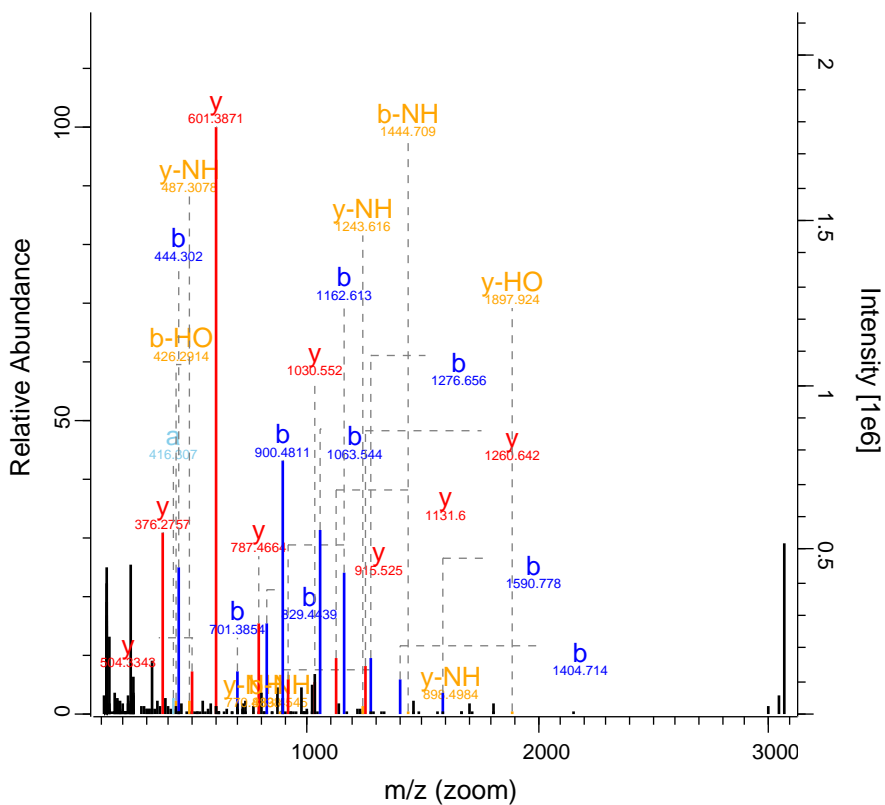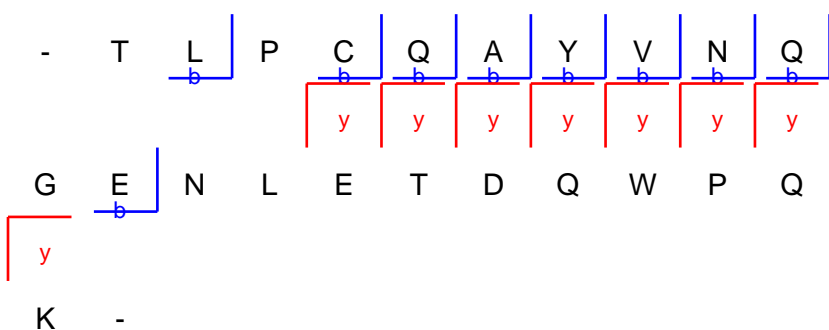

RO-QC-160121\_ZackD\_SS\_Set\_01\_Fractio 28845 FTMS; HC 100.22 688.69 PVRL3

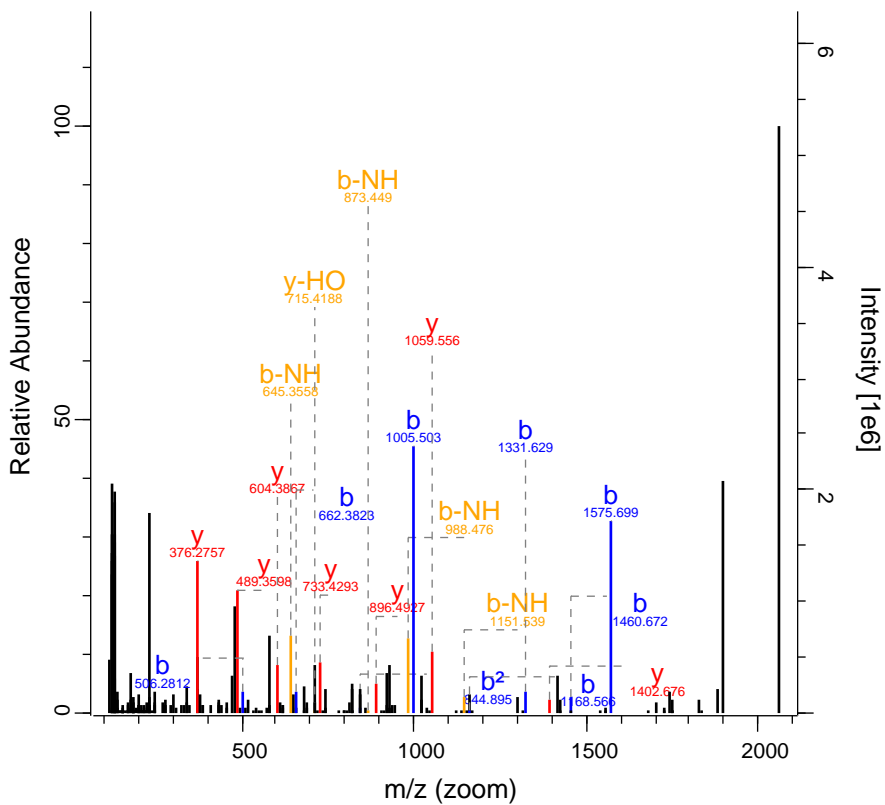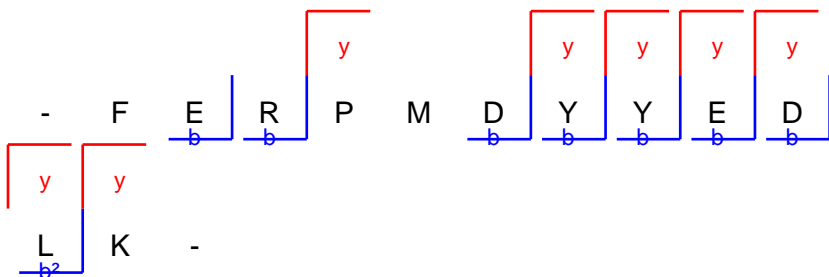

RO-QC-160121\_ZackD\_SS\_Set\_01\_Fractic 28926 FTMS; HC 62.47 1036.09 TMPRSS11B

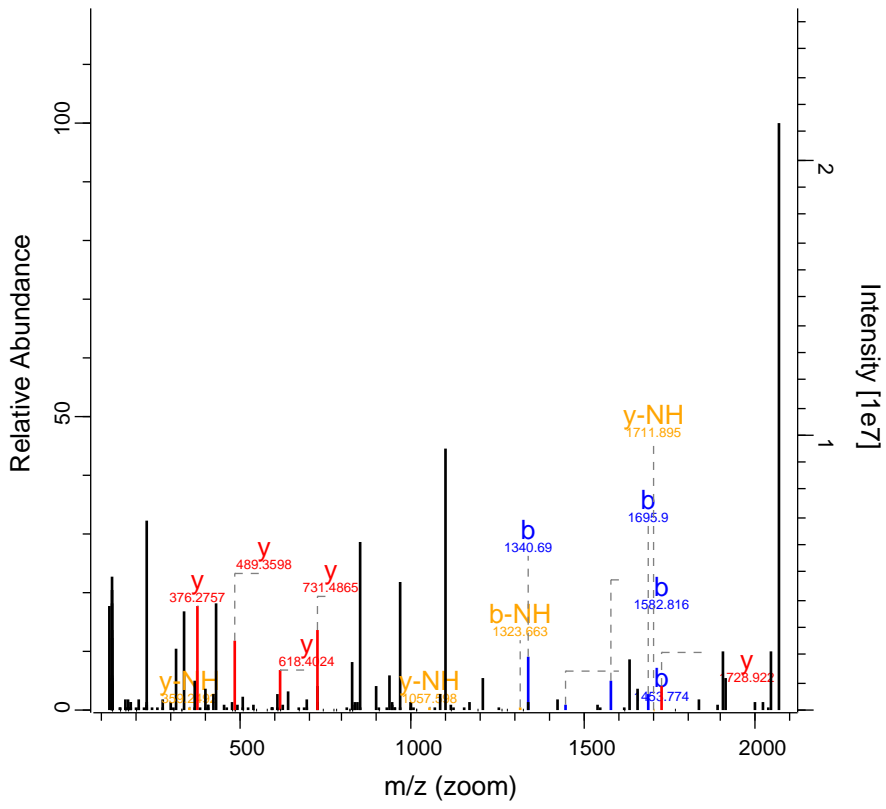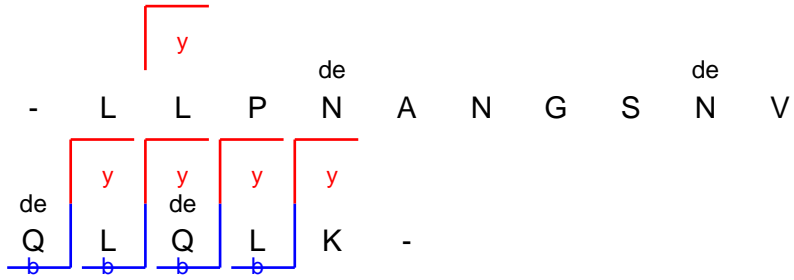

RO-QC-160121\_ZackD\_SS\_Set\_01\_Fraction 28947 FTMS; HC 75.9 933.81 VAMP4

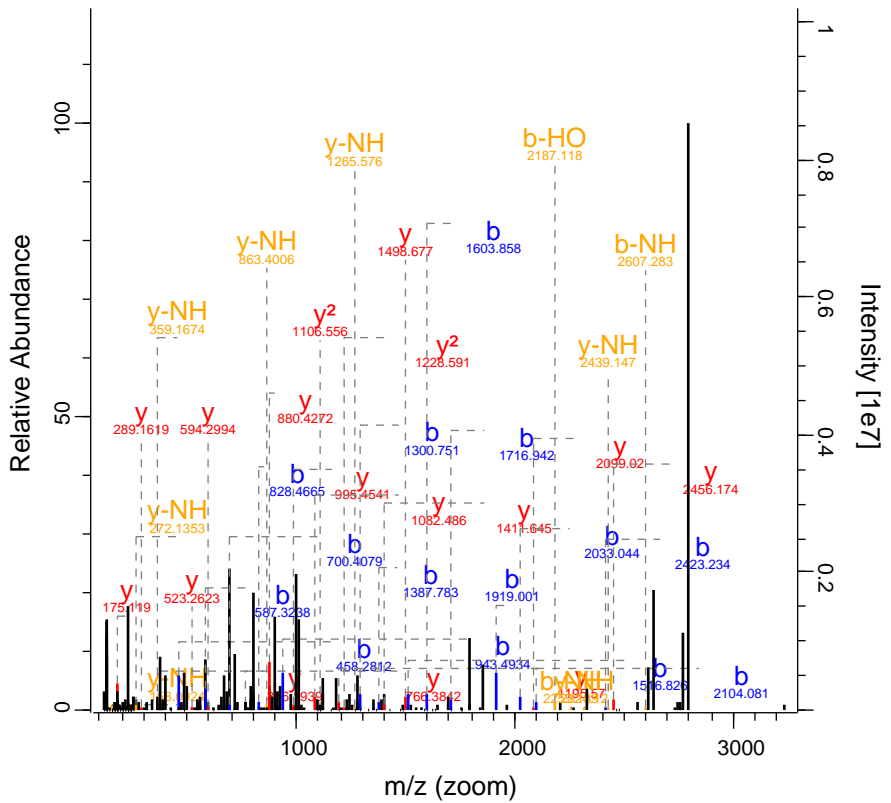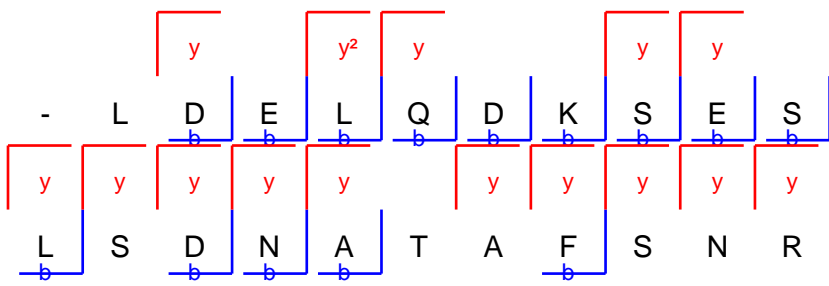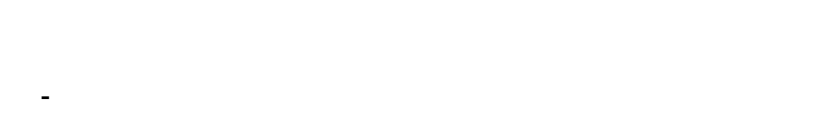

RO-QC-160121\_ZackD\_SS\_Set\_01\_Fractio 28952 FTMS; HC 139.11 849.44 SLC31A1

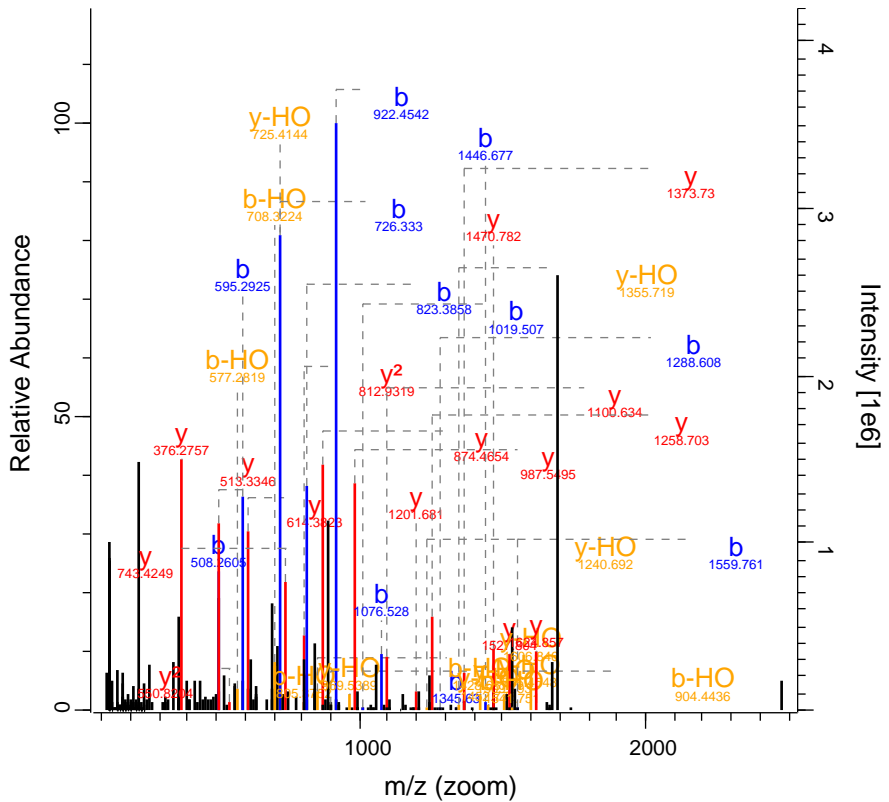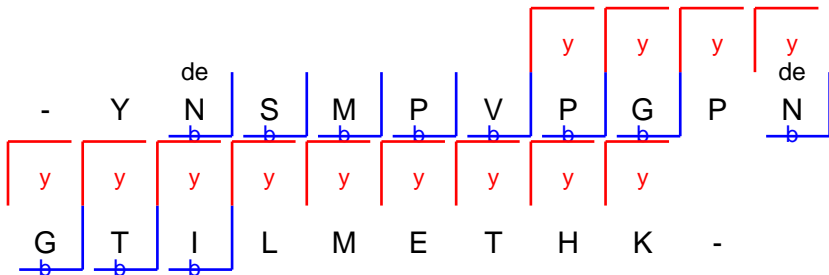

RO-QC-160121\_ZackD\_SS\_Set\_01\_Fraction 29064 FTMS; HC 70.62 619.03 SYT7

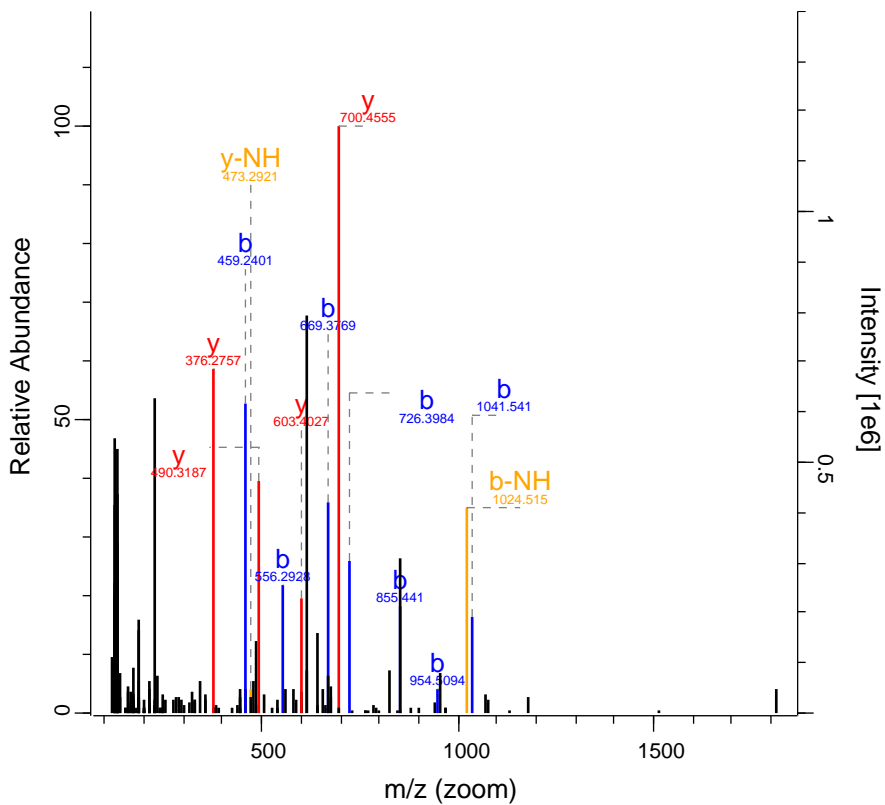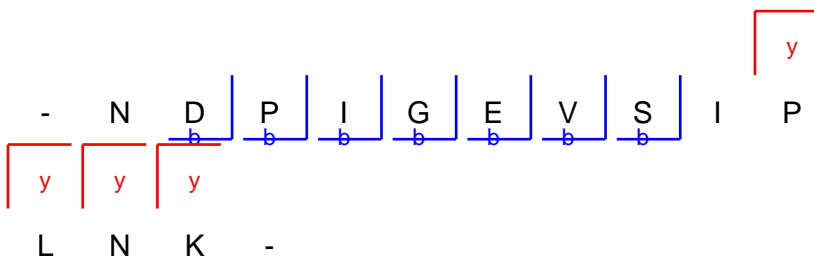

RO-QC-160121\_ZackD\_SS\_Set\_01\_Fraction 29178 FTMS; HC 97.49 849.78 SLC31A1

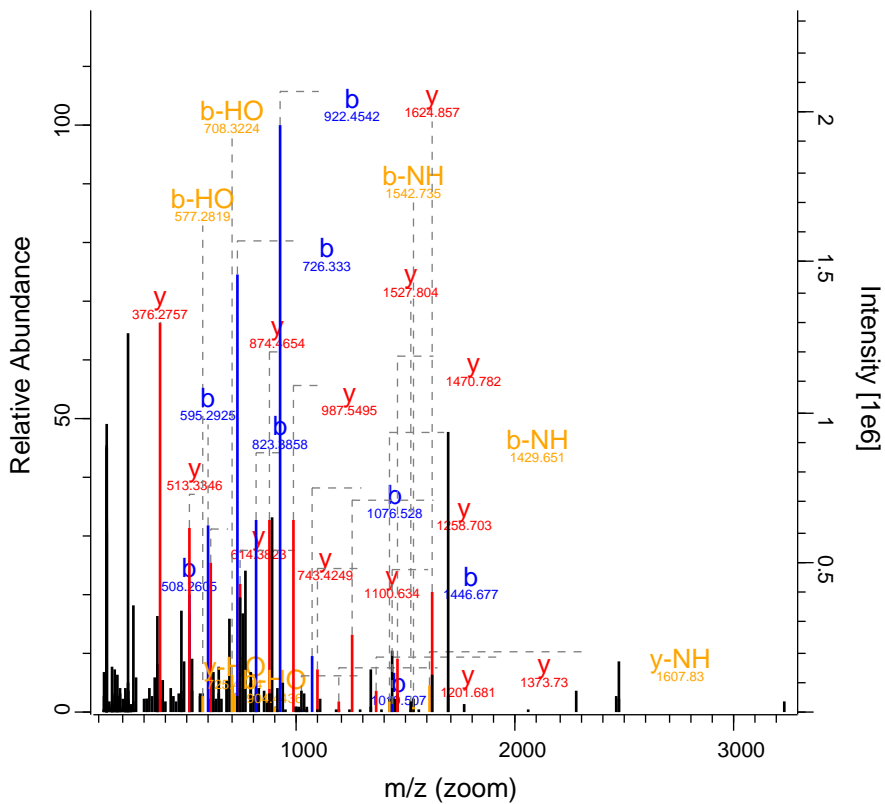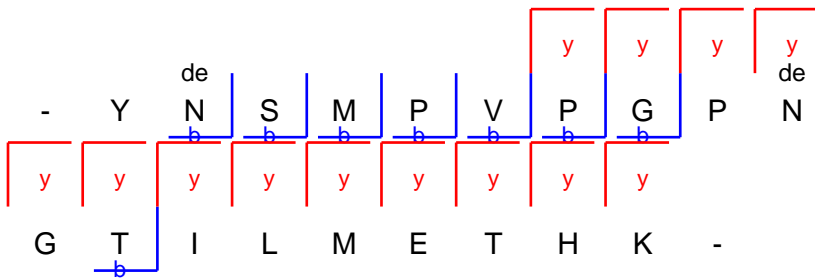

RO-QC-160121\_ZackD\_SS\_Set\_01\_Fractio 29652 FTMS; HC 105.32 849.44 SLC31A1

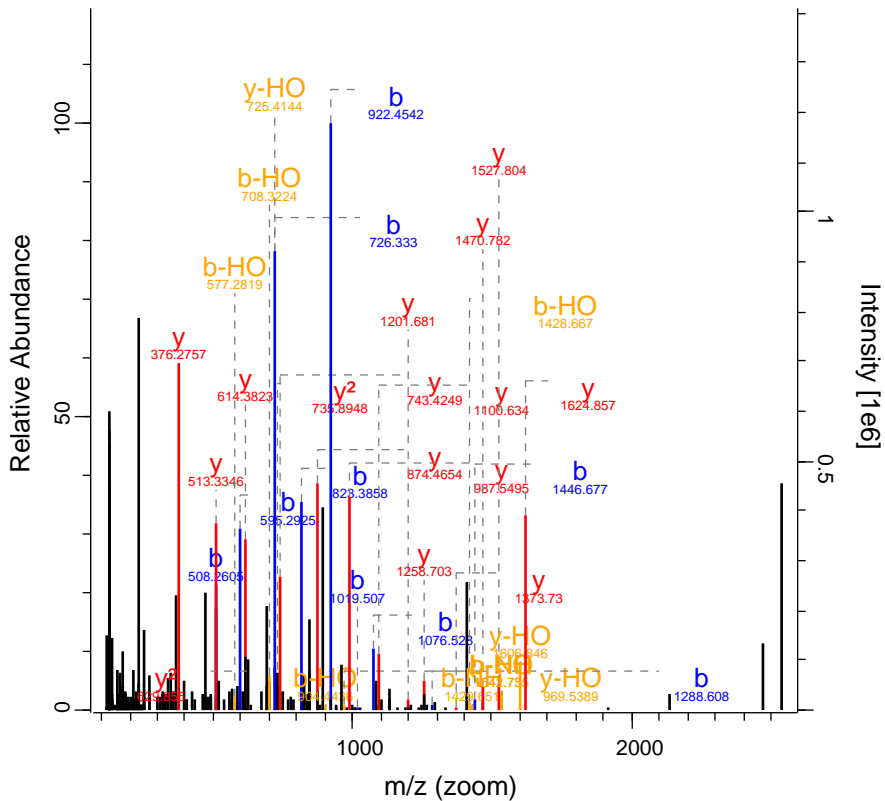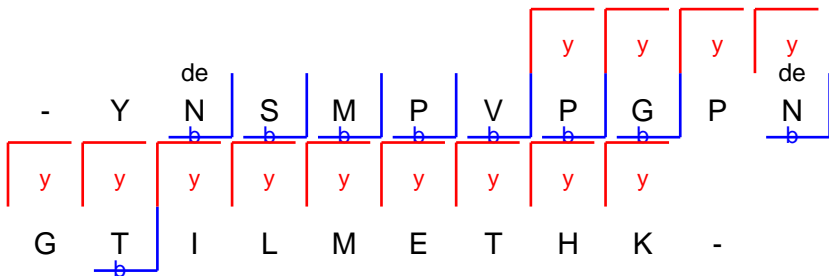



RO-QC-160121\_ZackD\_SS\_Set\_01\_Fractic 30067 FTMS; HC 73.63 1001.53 DUSP6

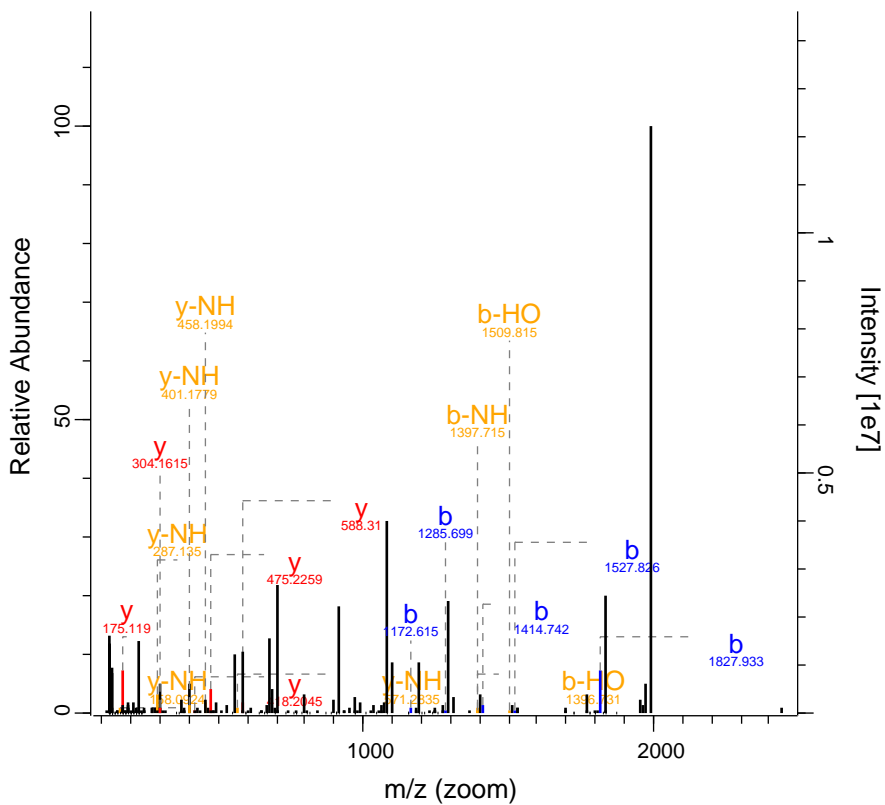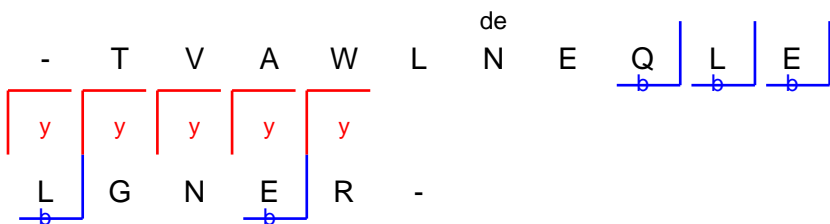

RO-QC-160121\_ZackD\_SS\_Set\_01\_Fraccio 30413 FTMS; HC 203.11 934.52 C14orf119

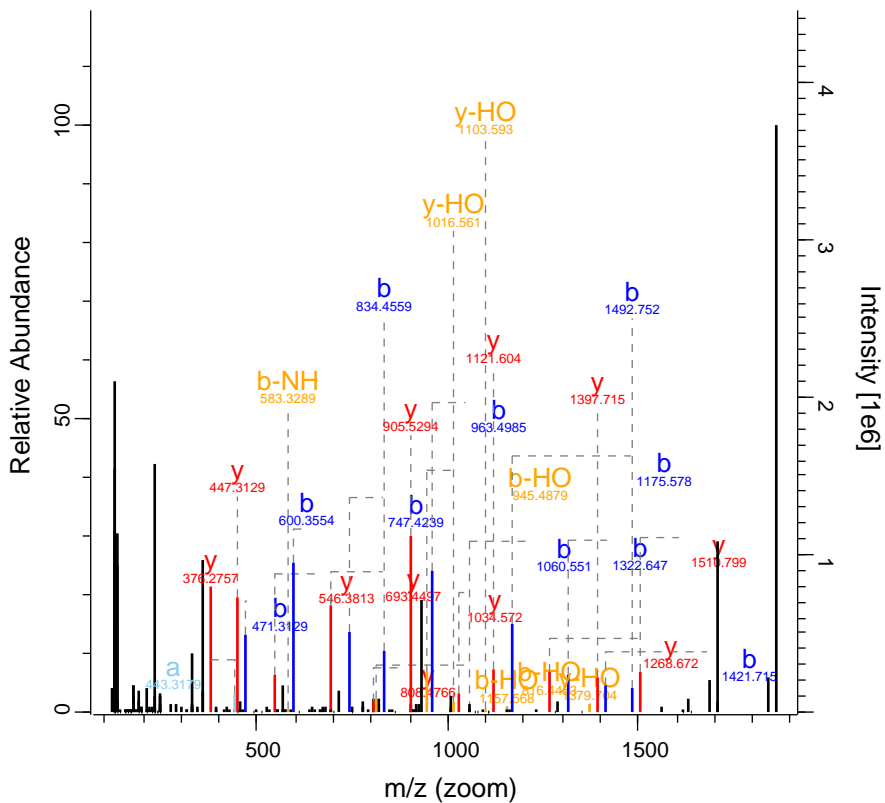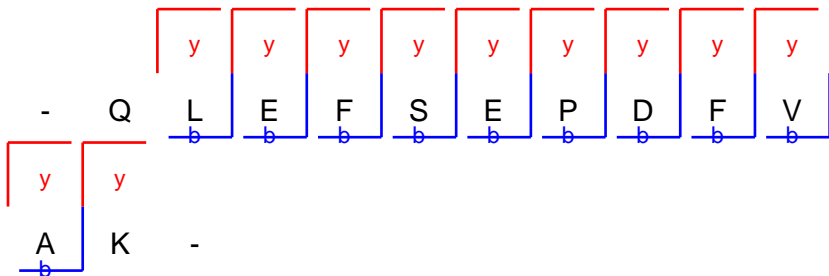

RO-QC-160121\_ZackD\_SS\_Set\_01\_Fraction 30425 FTMS; HC 79.28 623.68 C14orf119

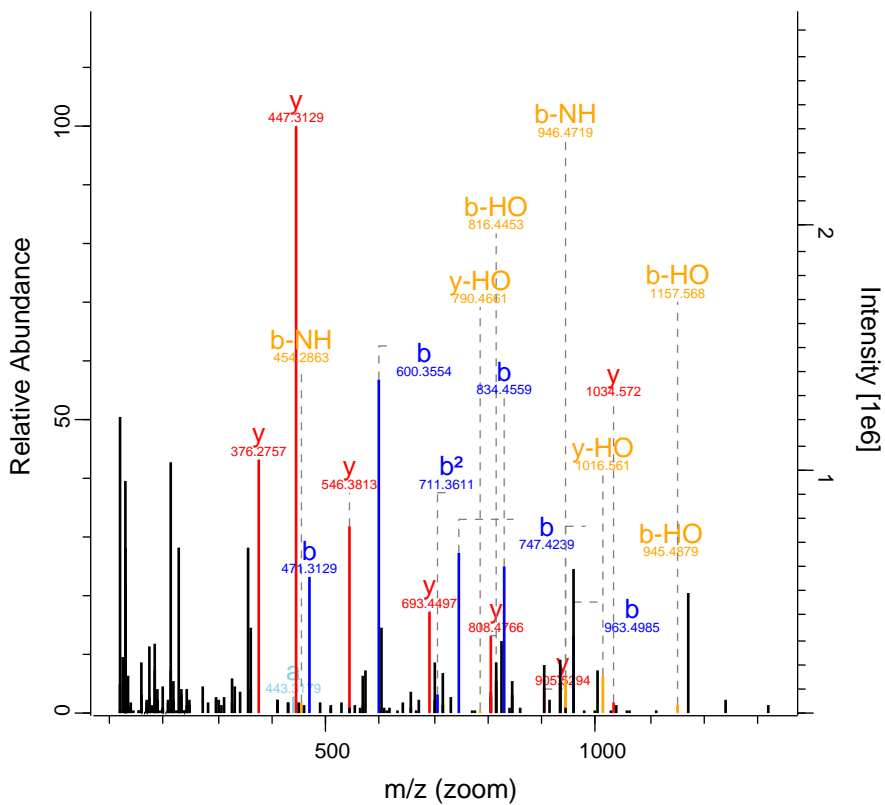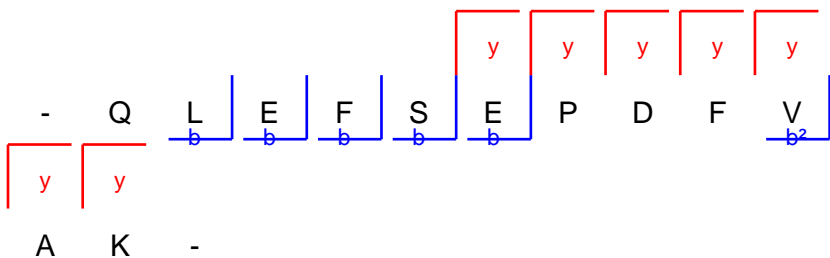

RO-QC-160121\_ZackD\_SS\_Set\_01\_Fractio 30456 FTMS; HC 200.68 812.91 FOXRED2

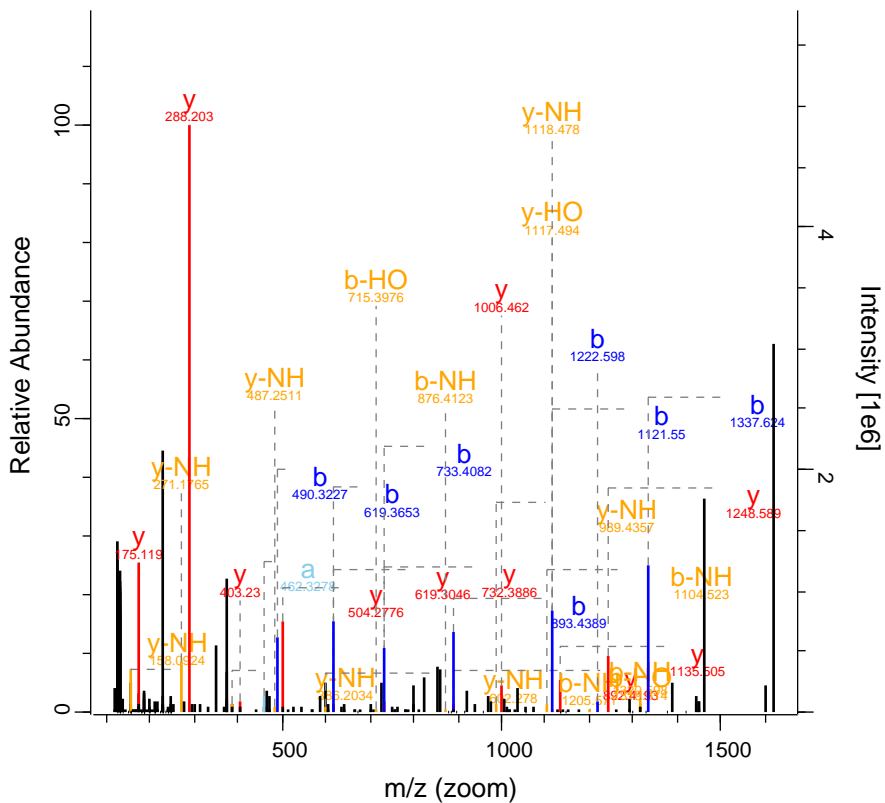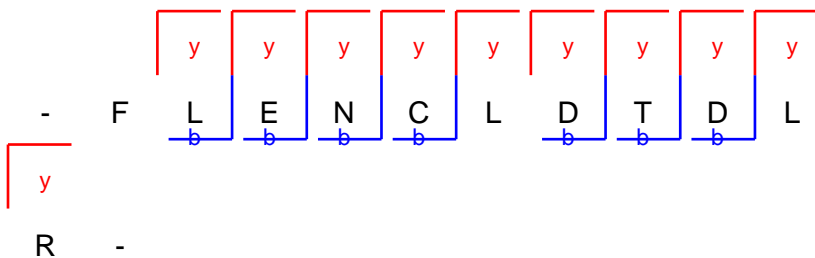

RO-QC-160121\_ZackD\_SS\_Set\_01\_Fraction 35240 FTMS; HC 42.34 548.65 OR10G3

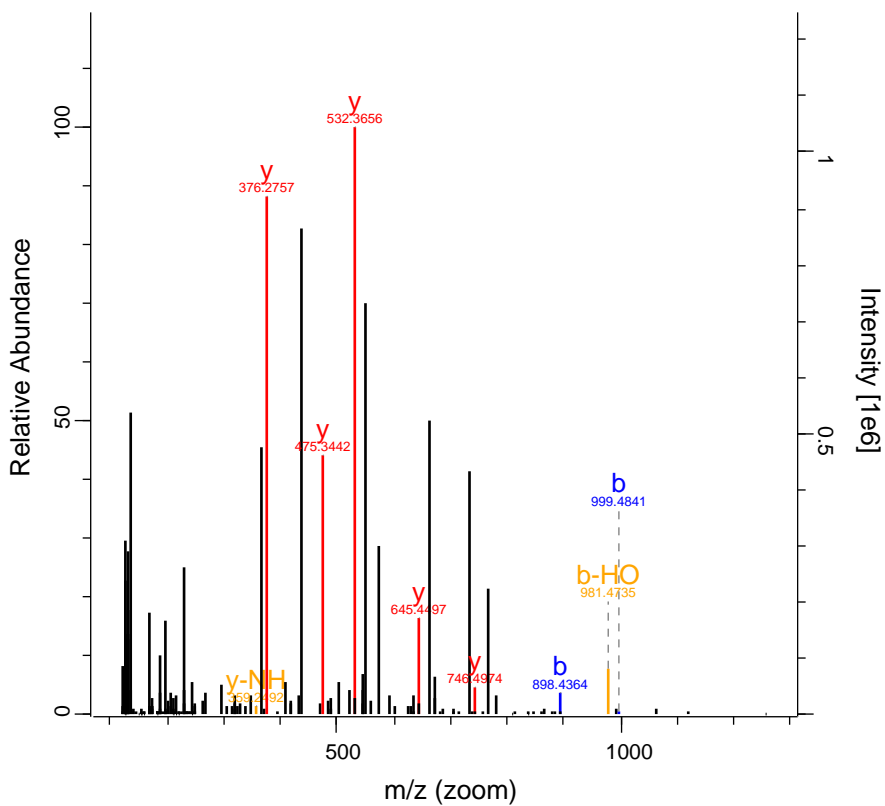

m/z (zoom)

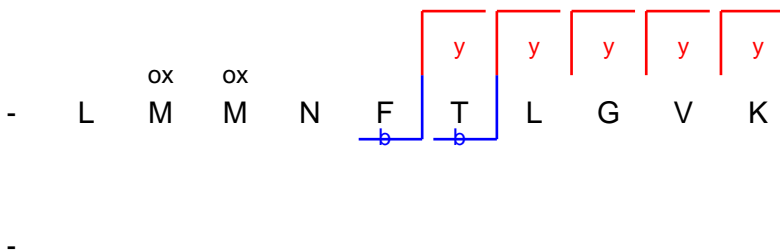

RO-QC-160121\_ZackD\_SS\_Set\_01\_Fraction 35303 FTMS; HC 47.55 779.08 VAV1

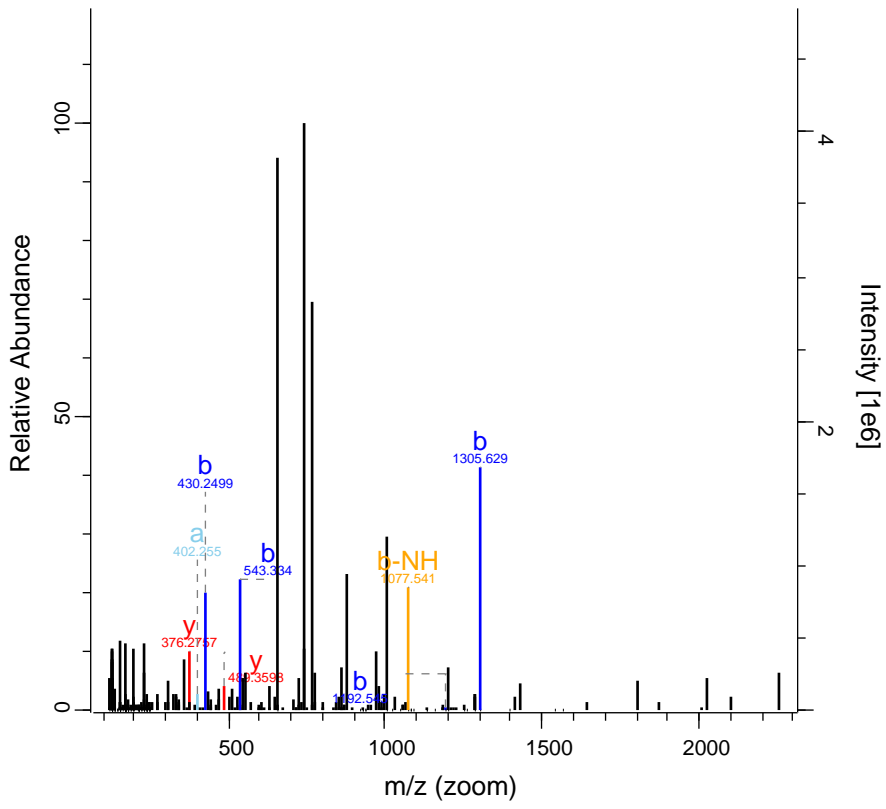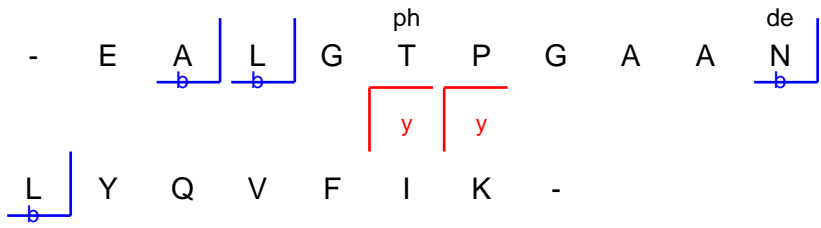

RO-QC-160121\_ZackD\_SS\_Set\_01\_Fraction 35313 FTMS; HC 40.04 822.46 OR10G3

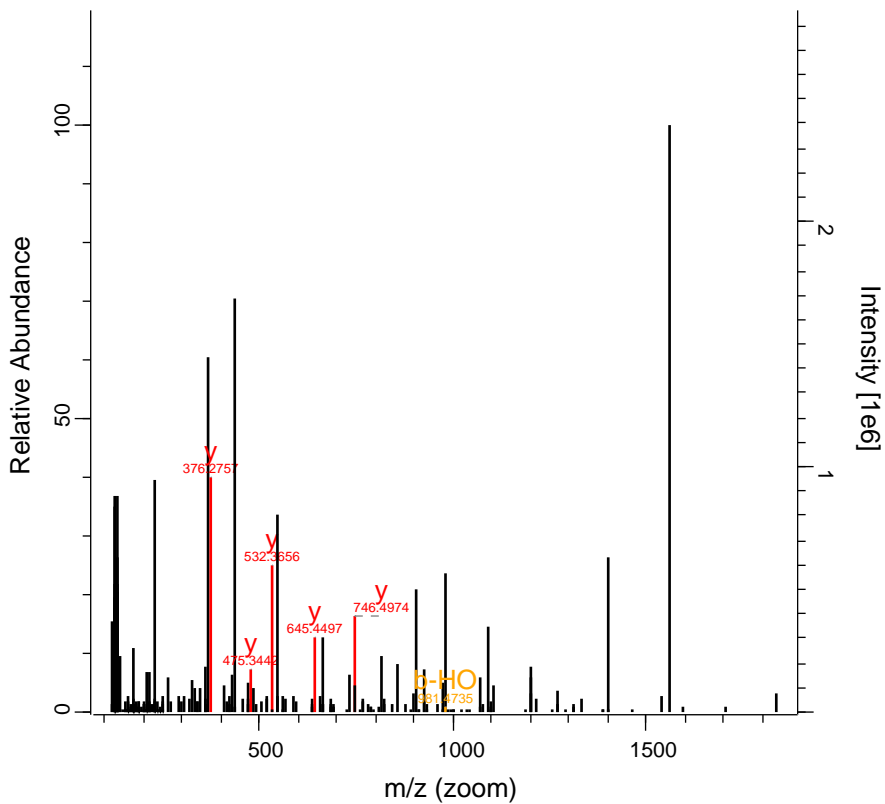

y
y
y
y
y

- L M M N F T L G V K

ox ox

RO-QC-160121\_ZackD\_SS\_Set\_01\_Fraction 36064 FTMS; HC 44.1 994.85 DAPP1

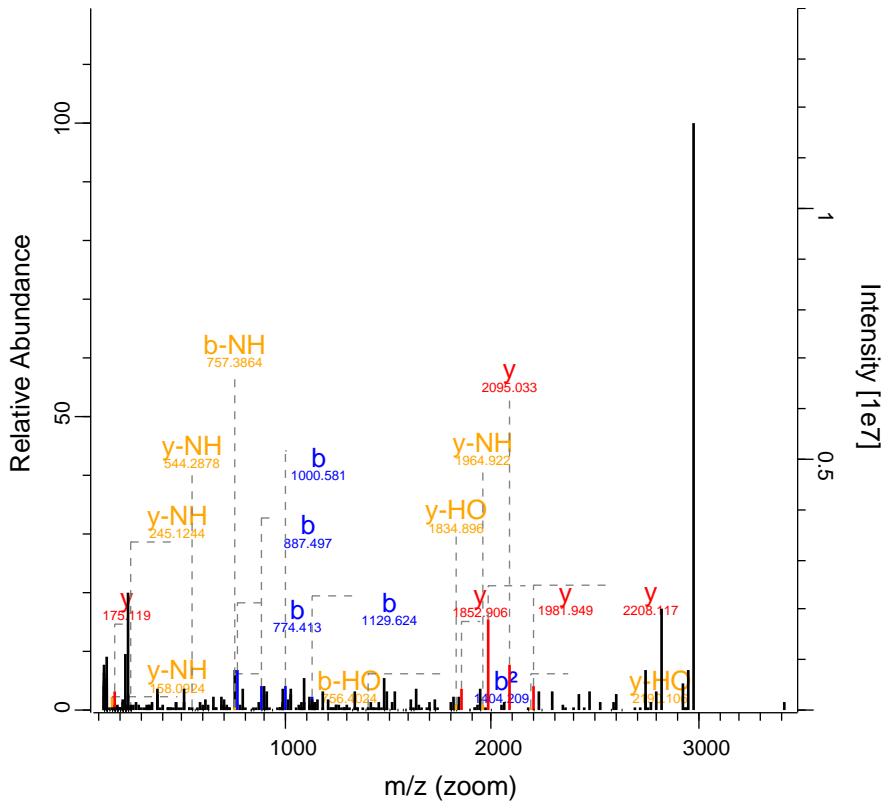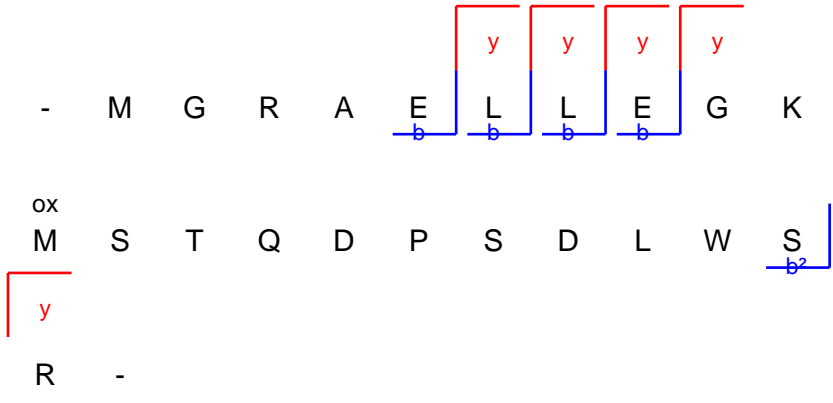

ox  
M S T Q D P S D L W S

y  
R -



RO-QC-160121\_ZackD\_SS\_Set\_01\_Fractic 36842 FTMS; HC 53.4 1323.69 SNCAIP

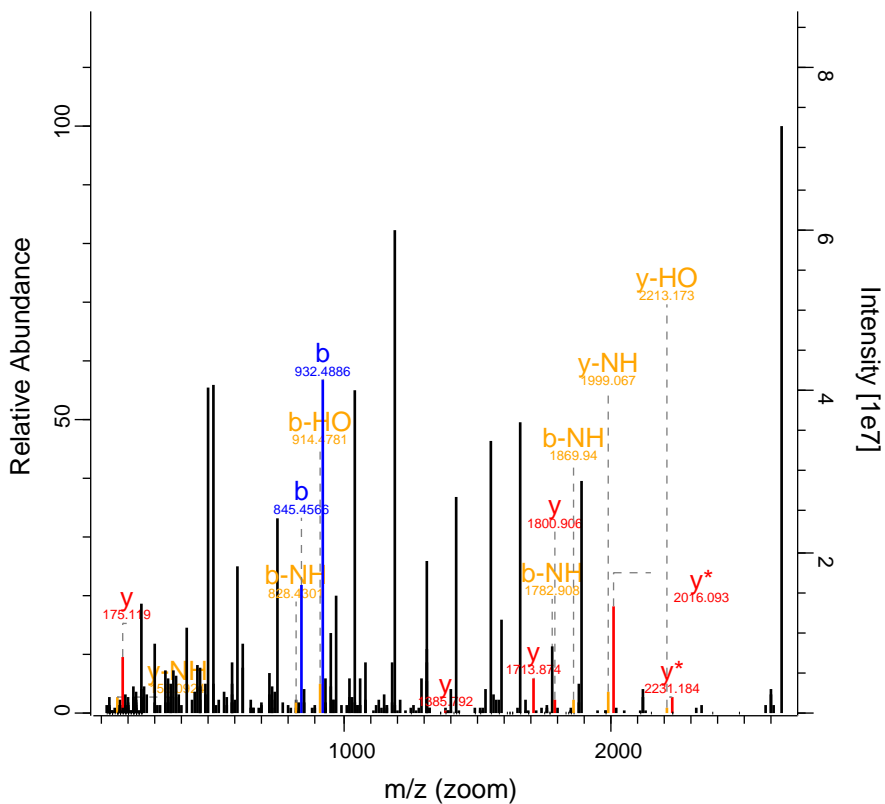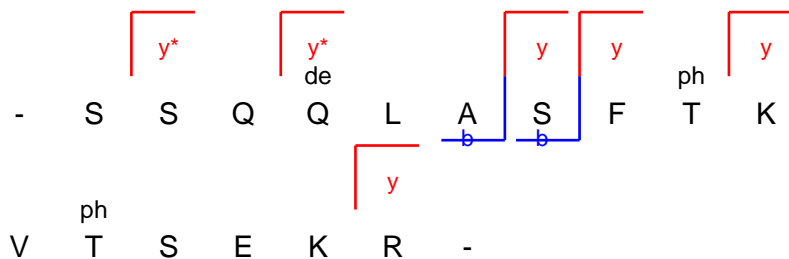

RO-QC-160121\_ZackD\_SS\_Set\_01\_Fractic 37102 FTMS; HC 46.16 1097.57 HHIP

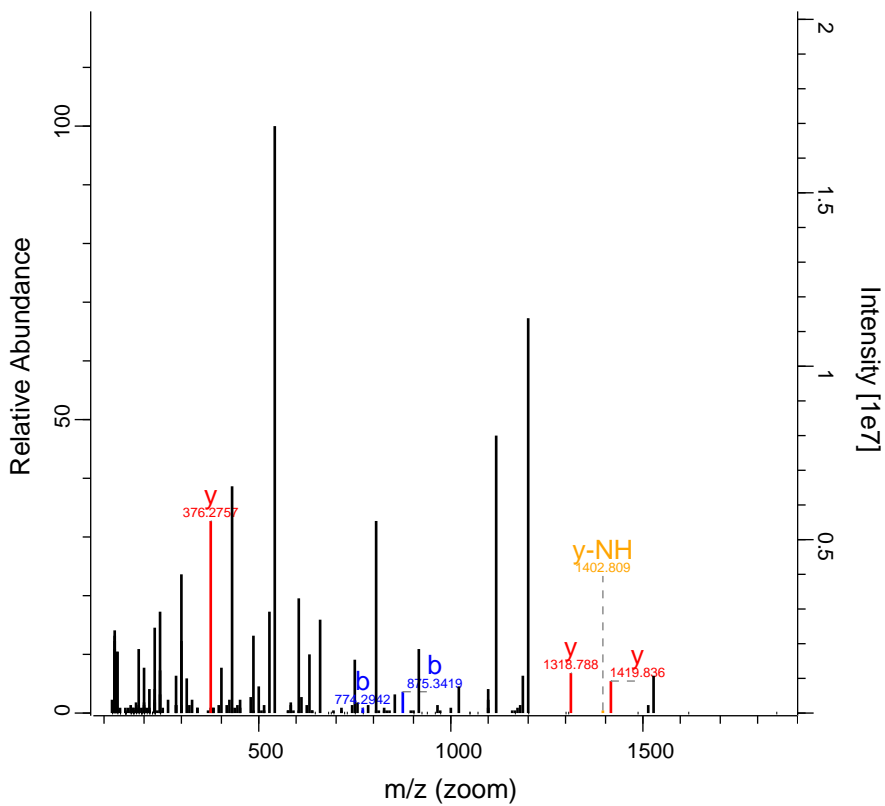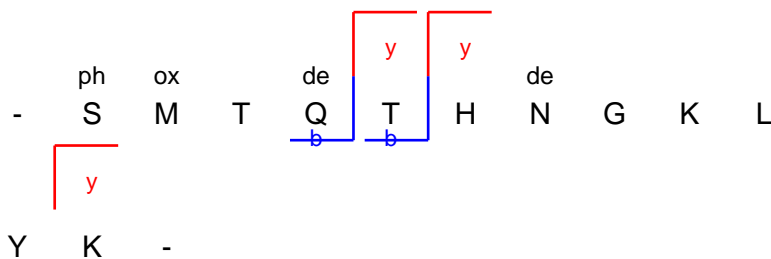

RO-QC-160121\_ZackD\_SS\_Set\_01\_Fraction 37738 FTMS; HCl 172.21 771.9 SLC48A1

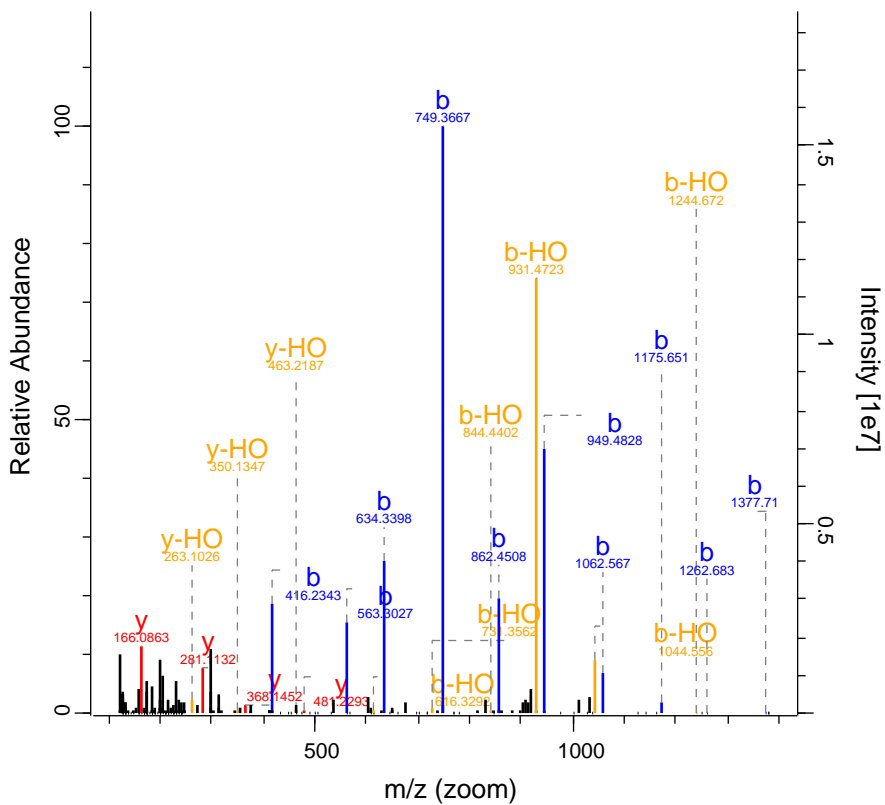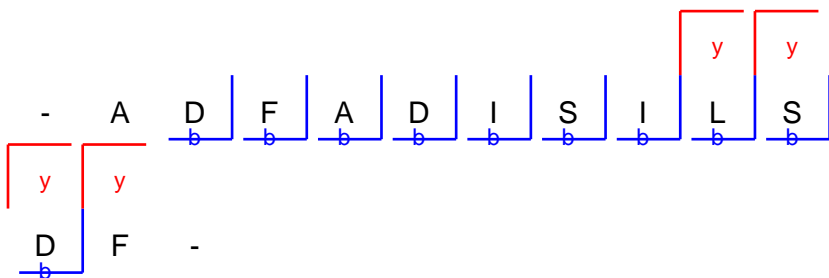

RO-QC-160121\_ZackD\_SS\_Set\_01\_Fractic 37739 FTMS; HC 132.79 1056.53 LRRC8D

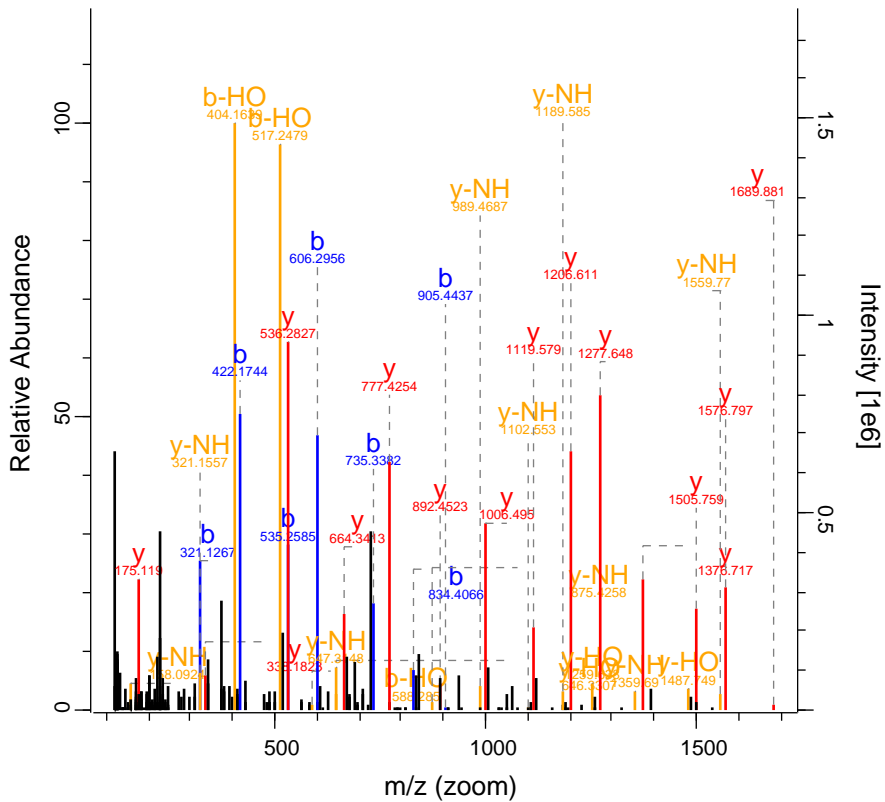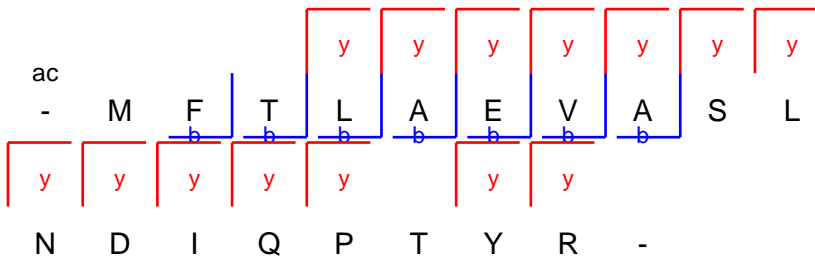

RO-QC-160121\_ZackD\_SS\_Set\_01\_Fraction 38148 FTMS; HC 41.87 872.14 LRRK2

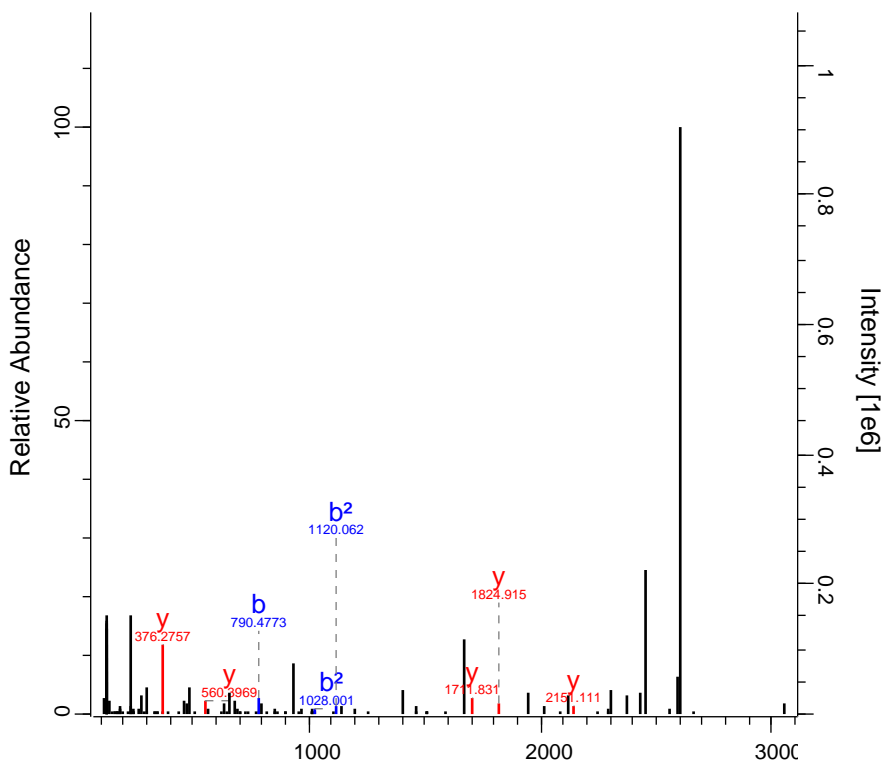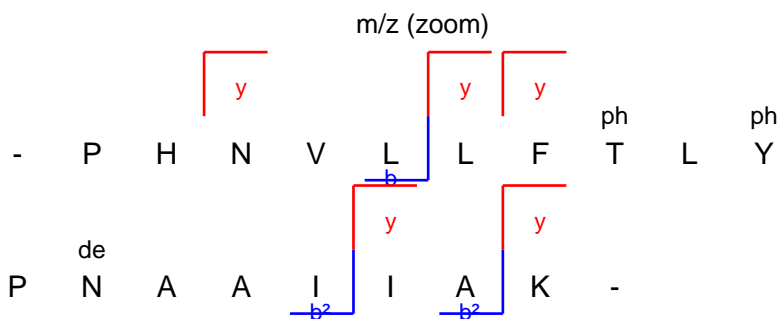

RO-QC-160121\_ZackD\_SS\_Set\_01\_Fraction 5569 FTMS; HC 151.98 522.94 TRAF3IP1

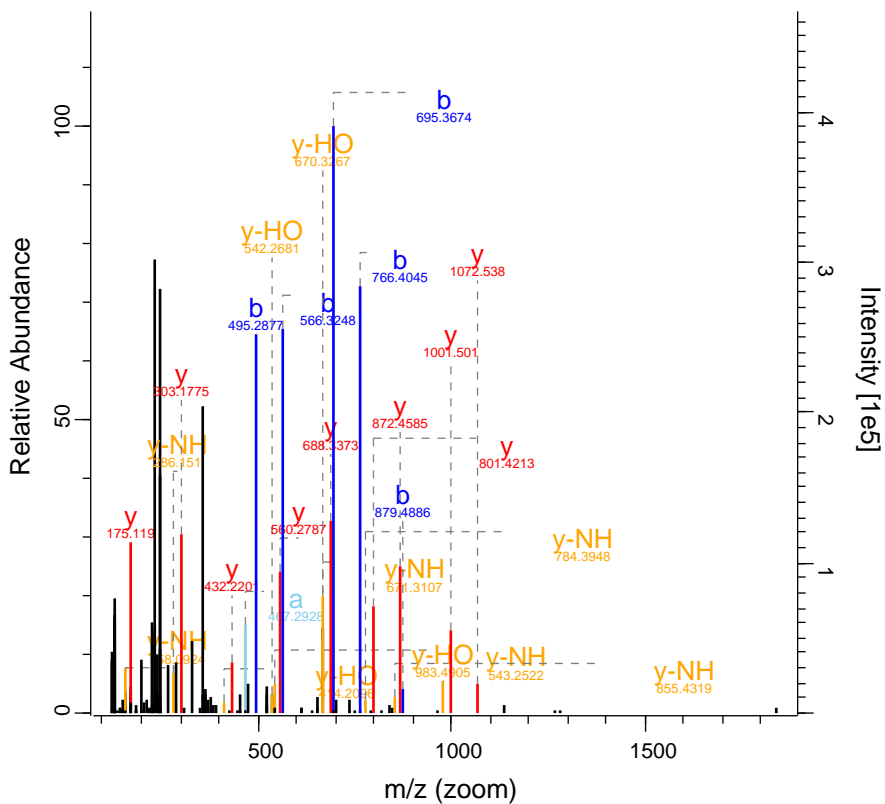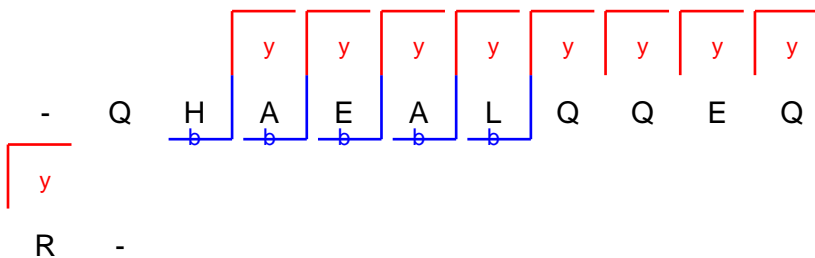

RO-QC-160121\_ZackD\_SS\_Set\_01\_Fraction 5615 FTMS; HC 106.29 783.91 TRAF3IP1

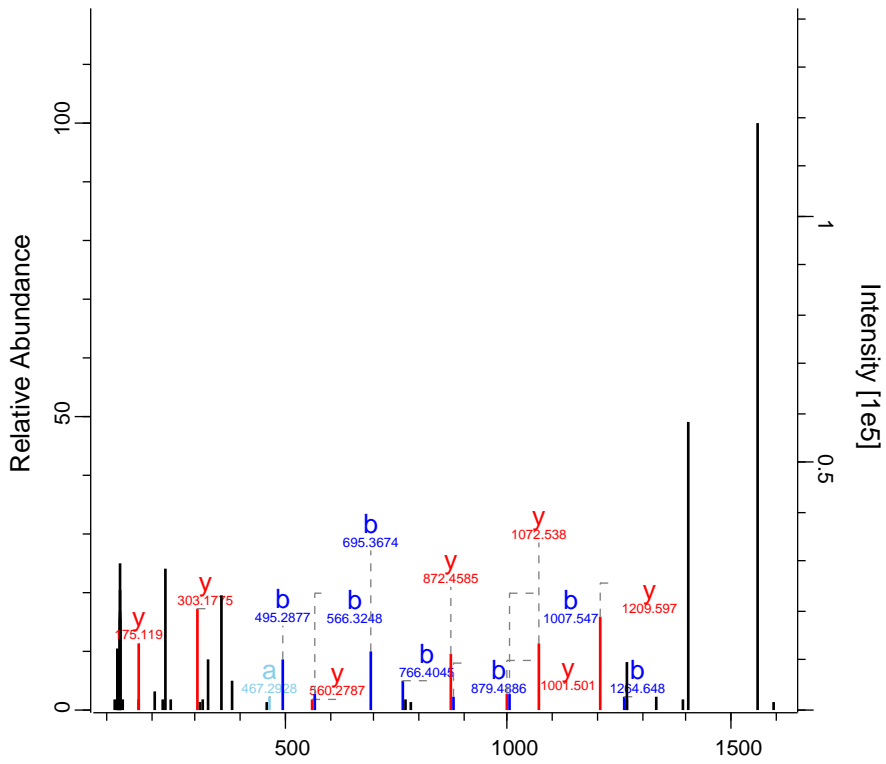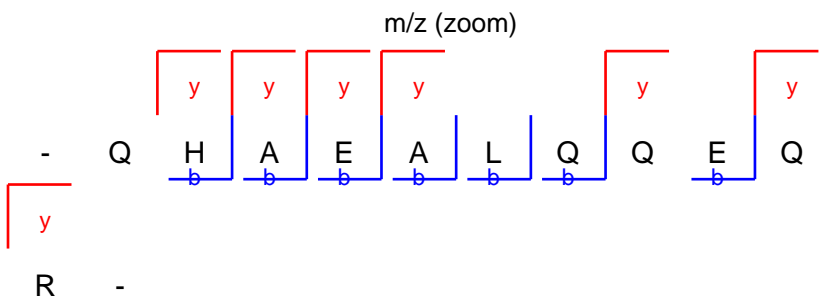

RO-QC-160121\_ZackD\_SS\_Set\_01\_Fraction 5790 FTMS; HCl 56.09 496.28 MYC

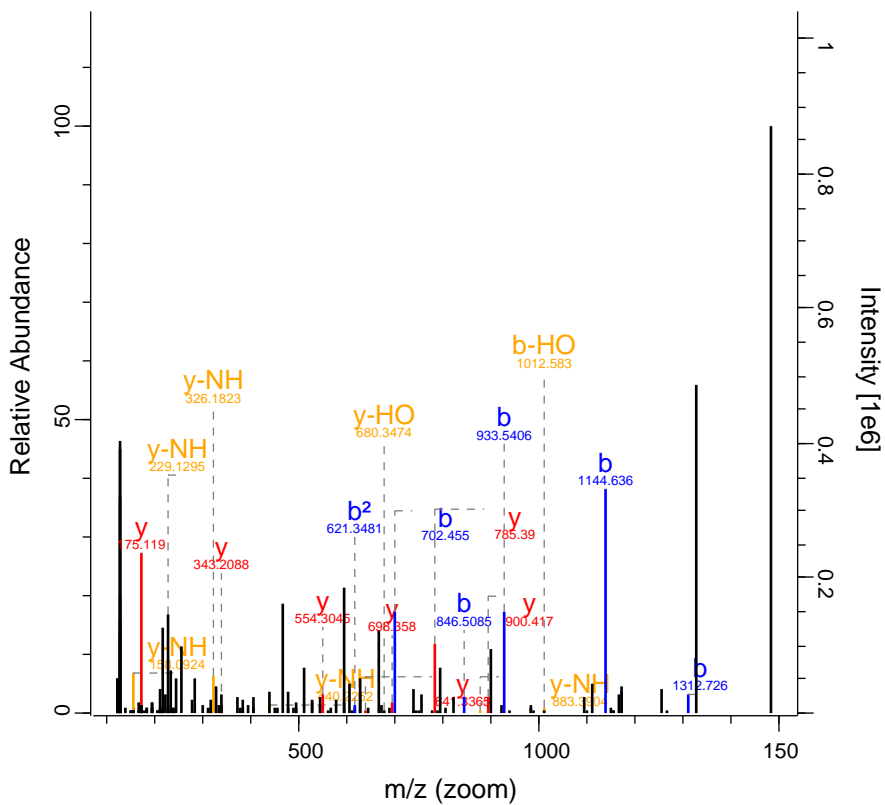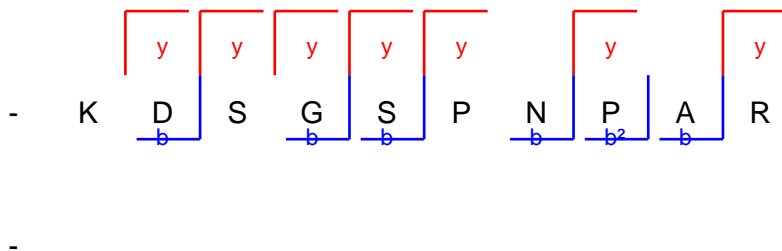



RO-QC-160121\_ZackD\_SS\_Set\_01\_Fraction 5949 FTMS; HCl 104.75 548.8 WIPF1

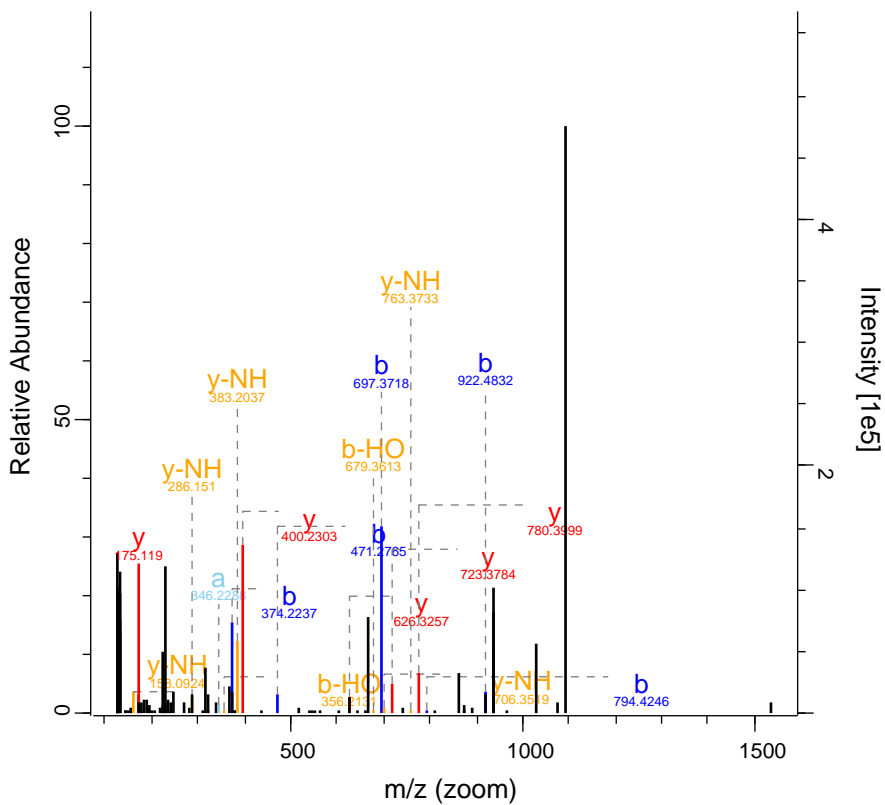

m/z (zoom)

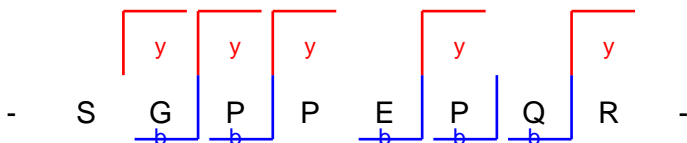

RO-QC-160121\_ZackD\_SS\_Set\_01\_Fraction 6656 FTMS; HCl 75.69 575.8 GPAM

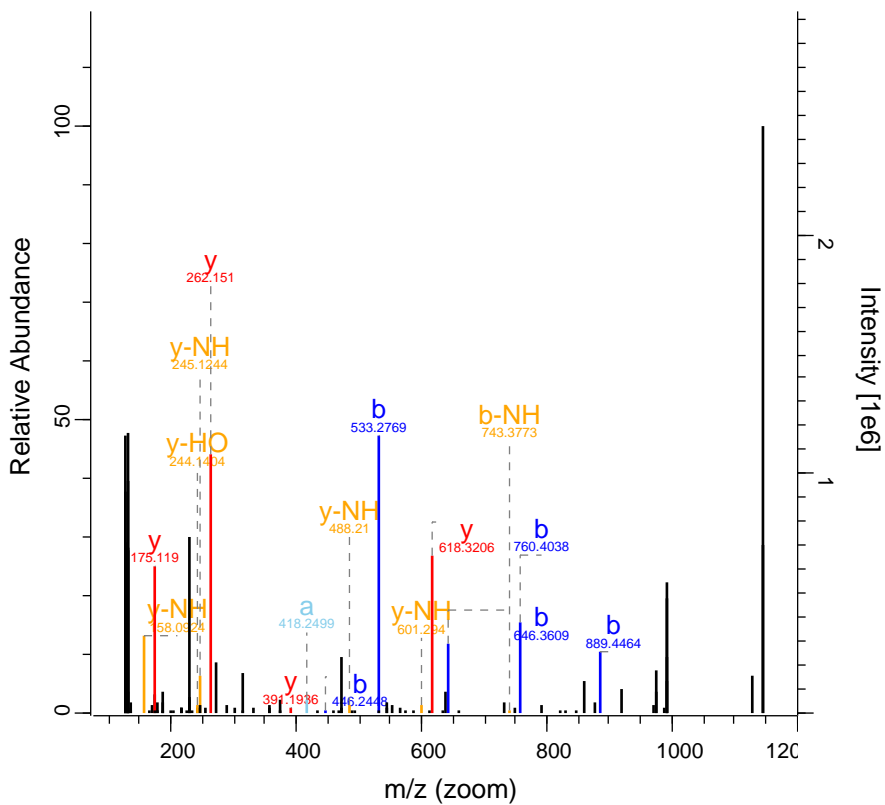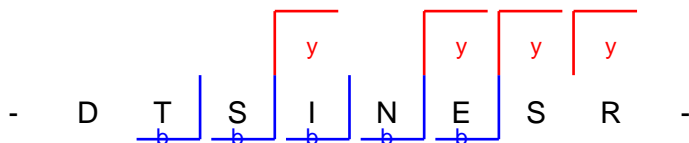

RO-QC-160121\_ZackD\_SS\_Set\_01\_Fraction 6787 FTMS; HC 154.75 686.31 C5orf45

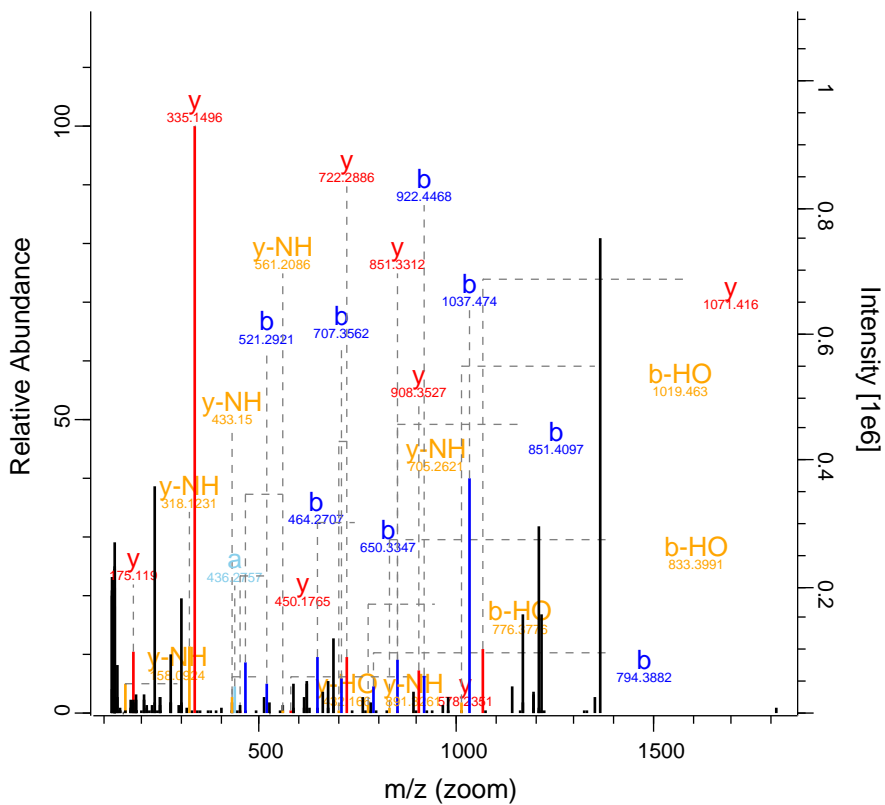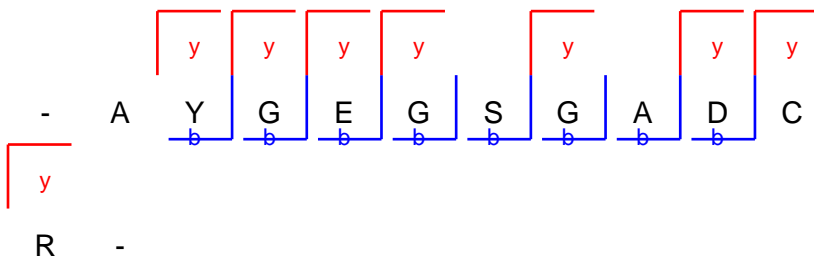

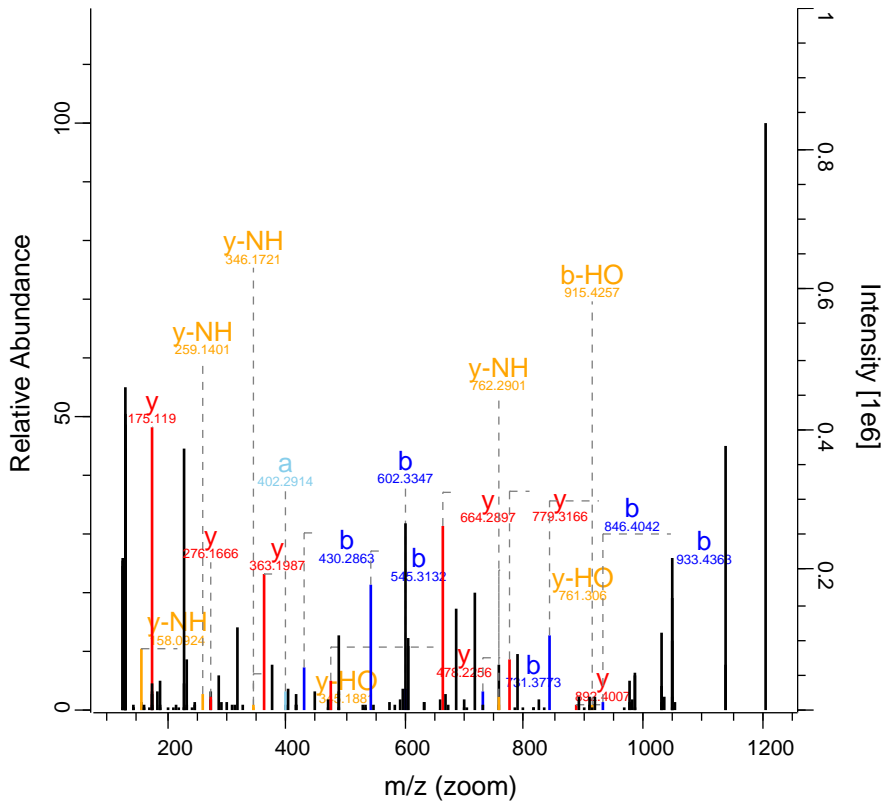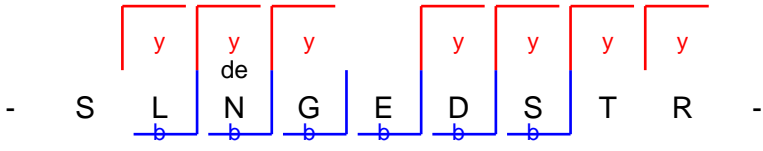

RO-QC-160121\_ZackD\_SS\_Set\_01\_Fraction 7612 FTMS; HC 121.99 608.38 HERC5

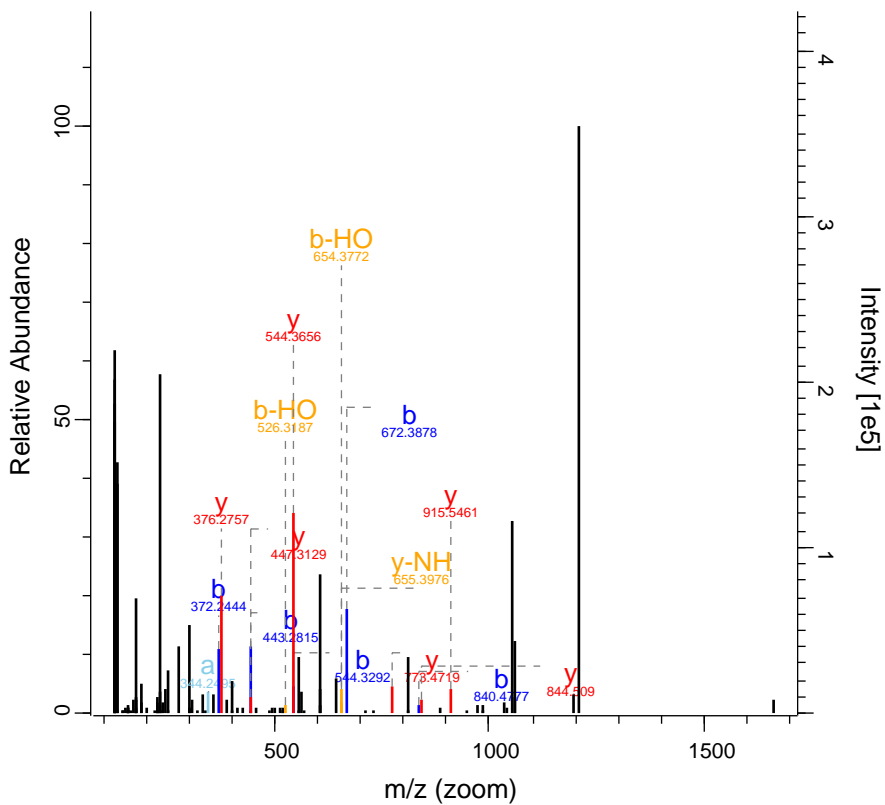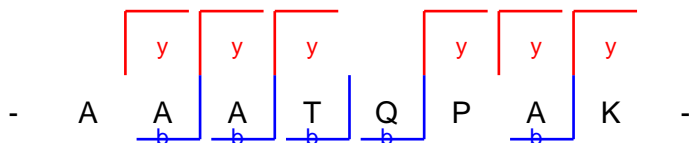

RO-QC-160121\_ZackD\_SS\_Set\_01\_Fraction\_7643 FTMS; HCl 178.23 660 CASP2

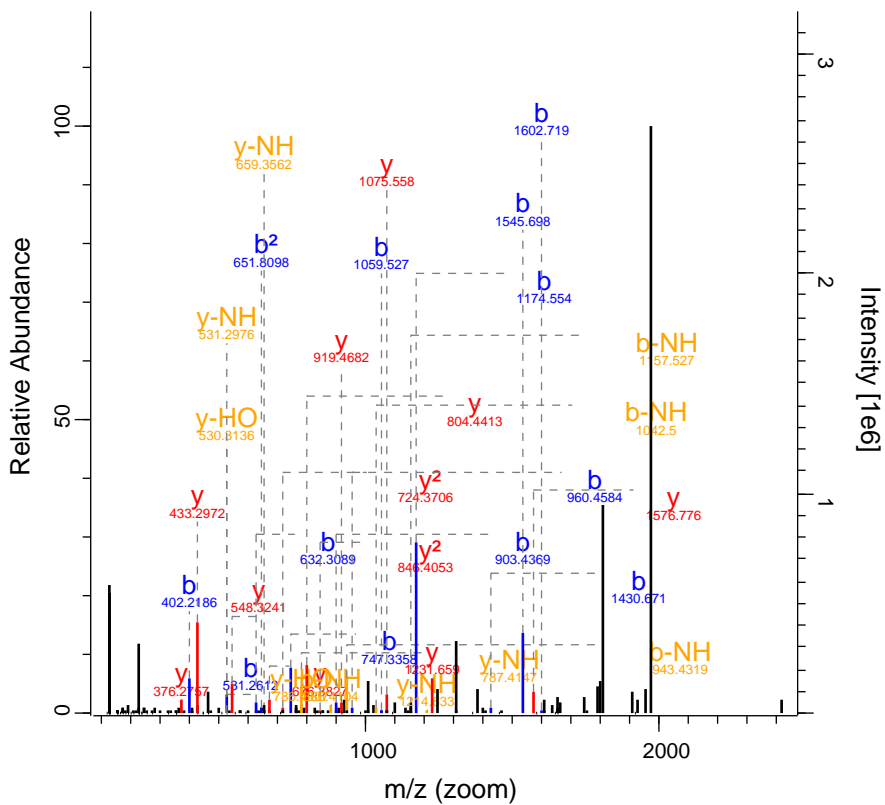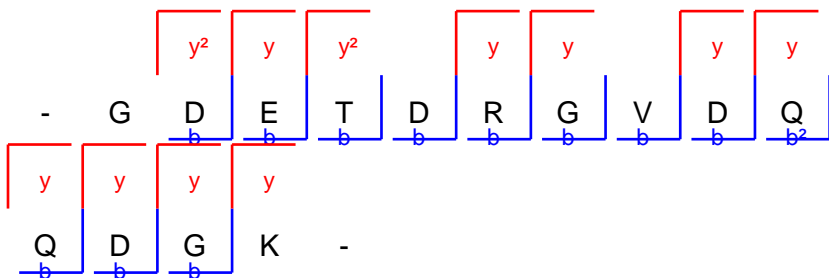

Raw File

Scan Method Score m/z

RO-QC-160121\_ZackD\_SS\_Set\_01\_Fraction\_3

8470 FTMS; HCD 71.3 451.25

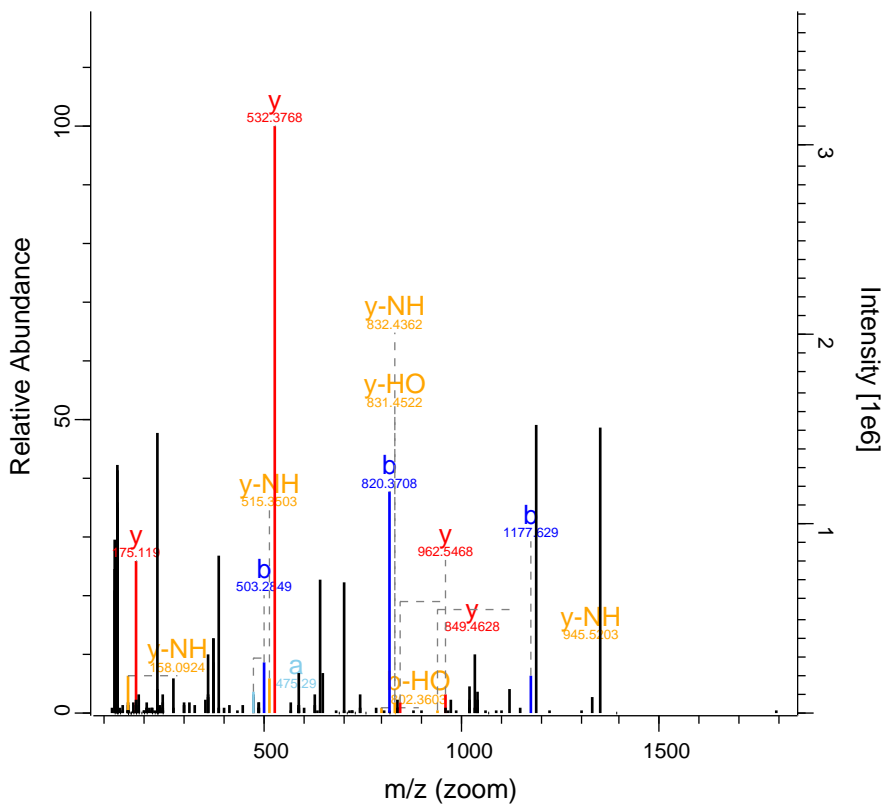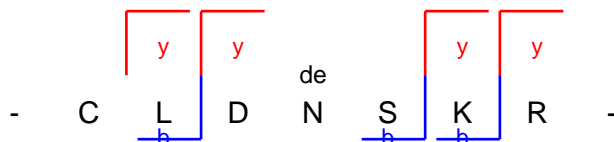

RO-QC-160121\_ZackD\_SS\_Set\_01\_Fraction 9100 FTMS; HC 140.24 860.94 CNOT8

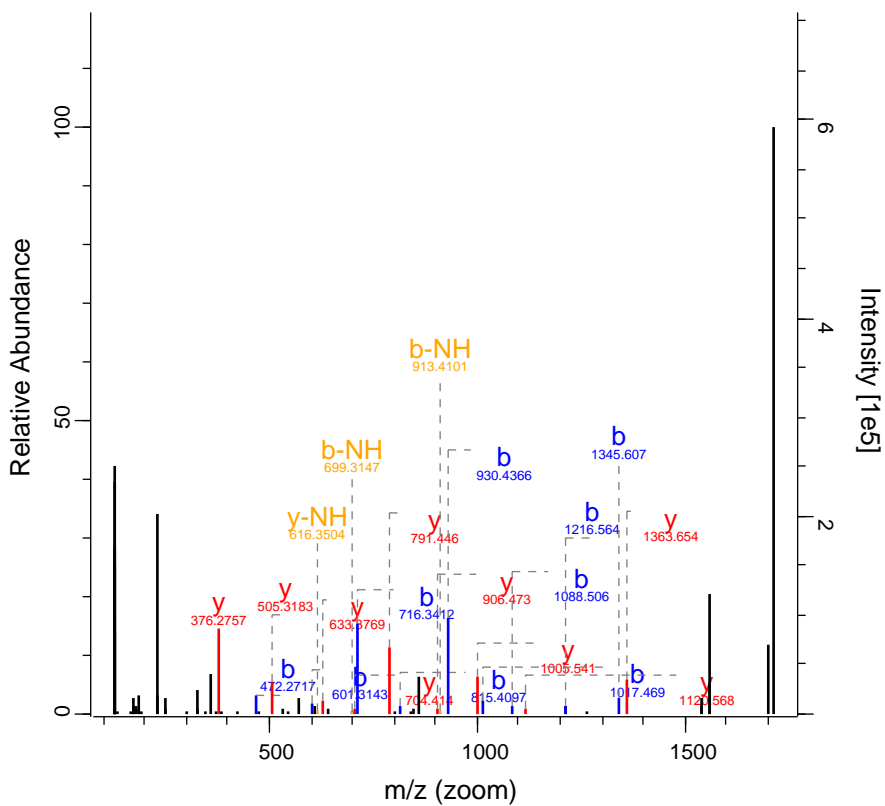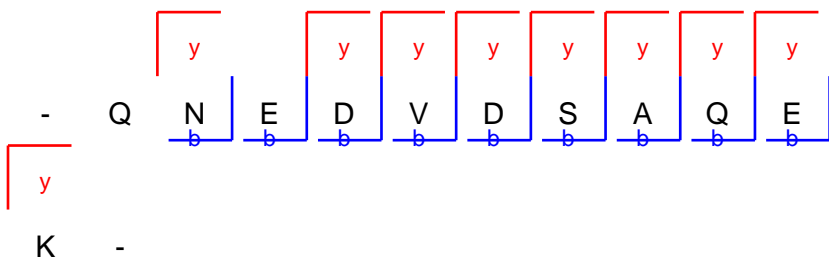



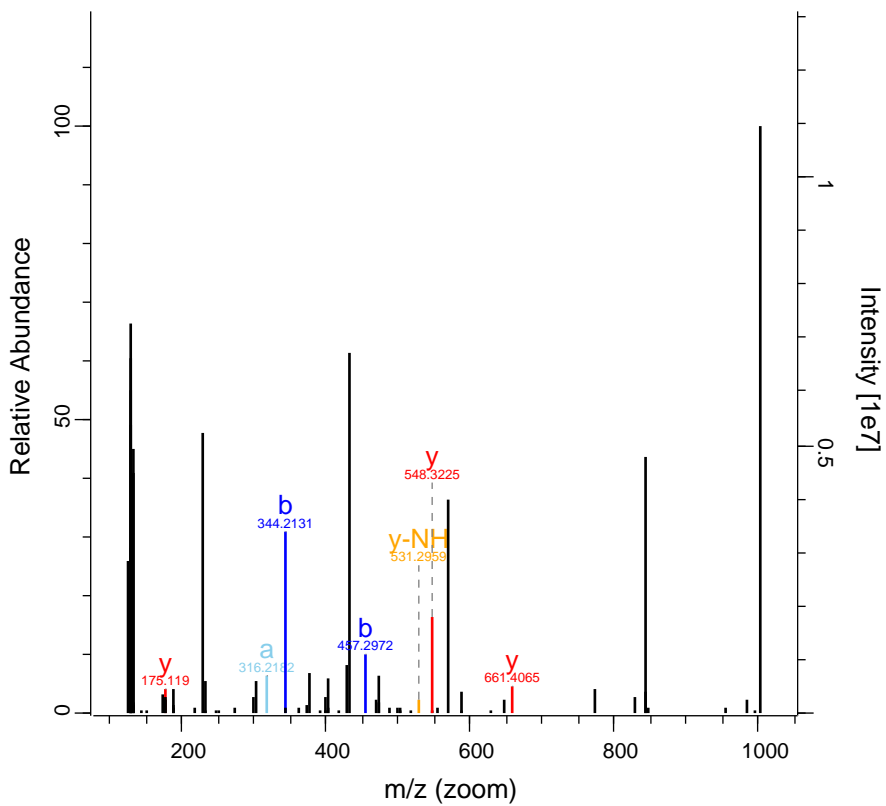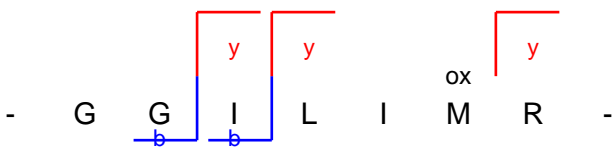

RO-QC-160121\_ZackD\_SS\_Set\_01\_Fraction 9985 FTMS; HC 107.56 623.83 TXNDC11

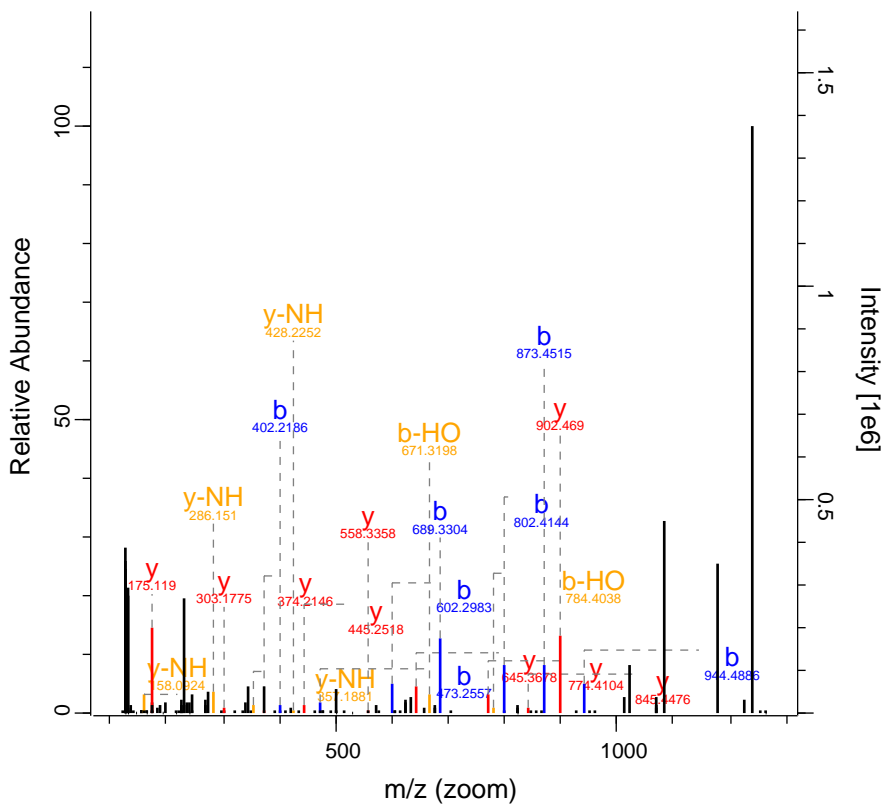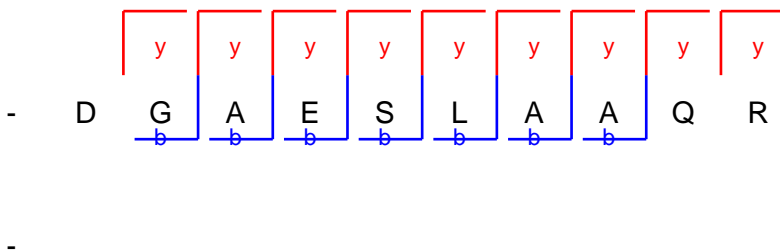

RO-QC-160121\_ZackD\_SS\_Set\_01\_Fraction\_3

10440 FTMS; HCD 41.3 403.9

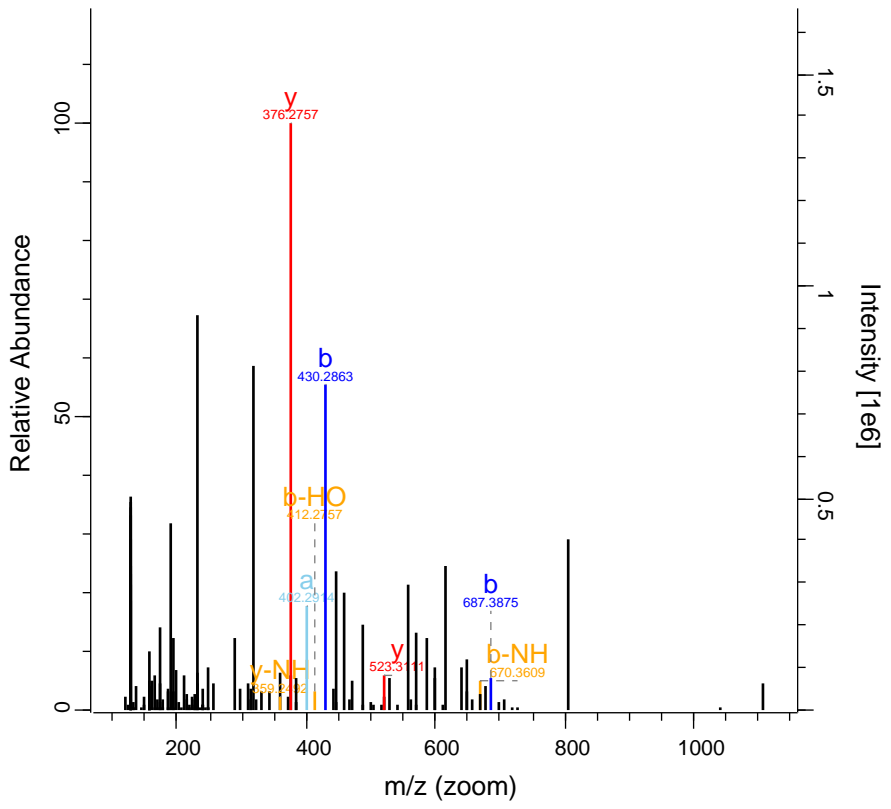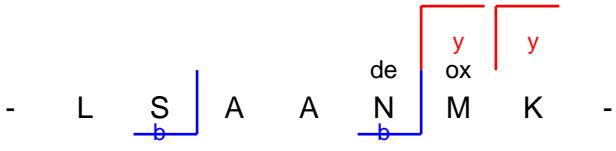

RO-QC-160121\_ZackD\_SS\_Set\_01\_Fraction 10536 FTMS; HC 77.73 493.29 CADM3

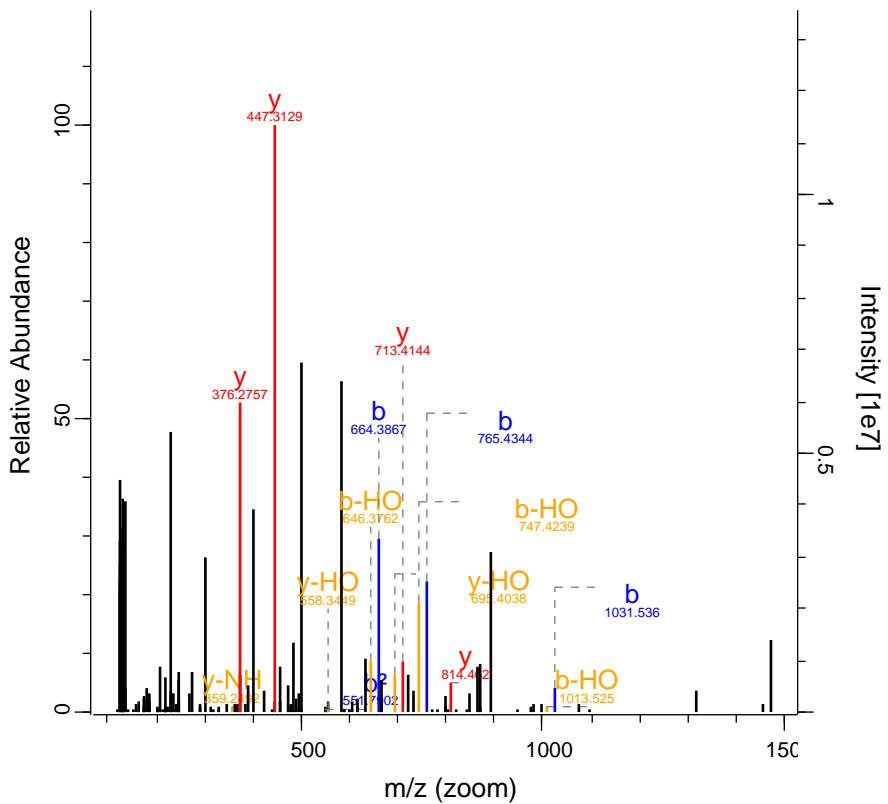

m/z (zoom)

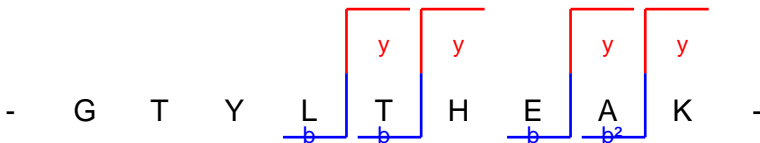

RO-QC-160121\_ZackD\_SS\_Set\_01\_Fraction 10616 FTMS; HC 96.25 425.59 G6PC3

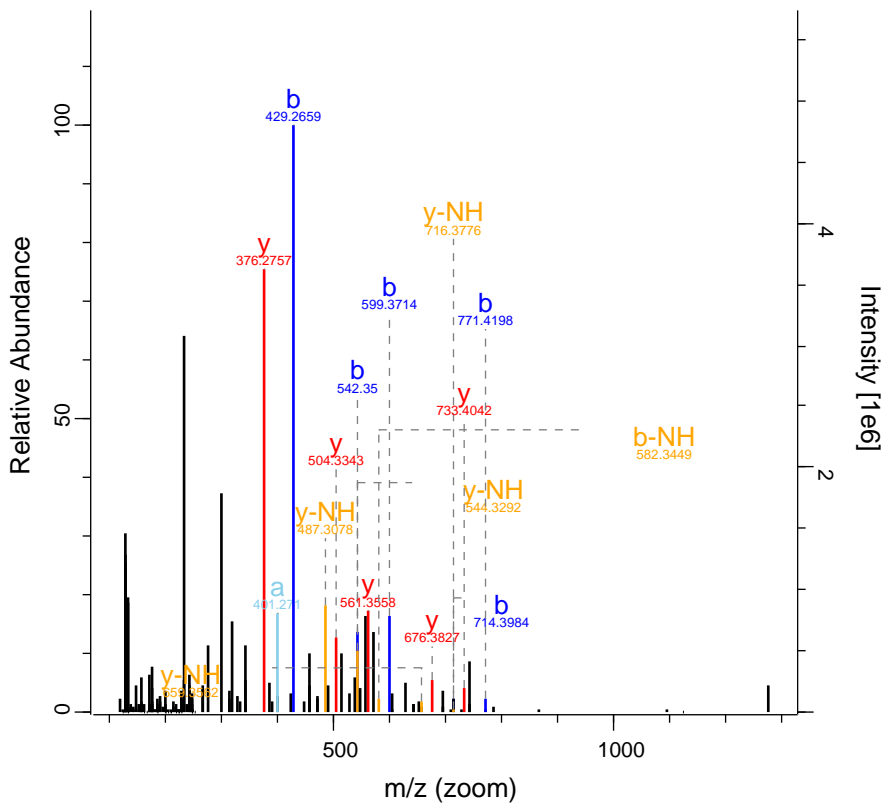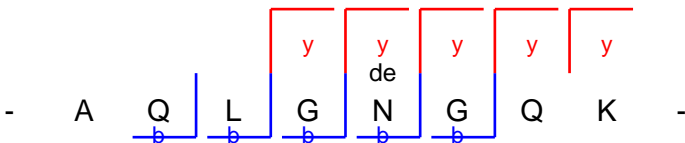

RO-QC-160121\_ZackD\_SS\_Set\_01\_Fraction 10679 FTMS; HC 93.26 469.92 EFHC2

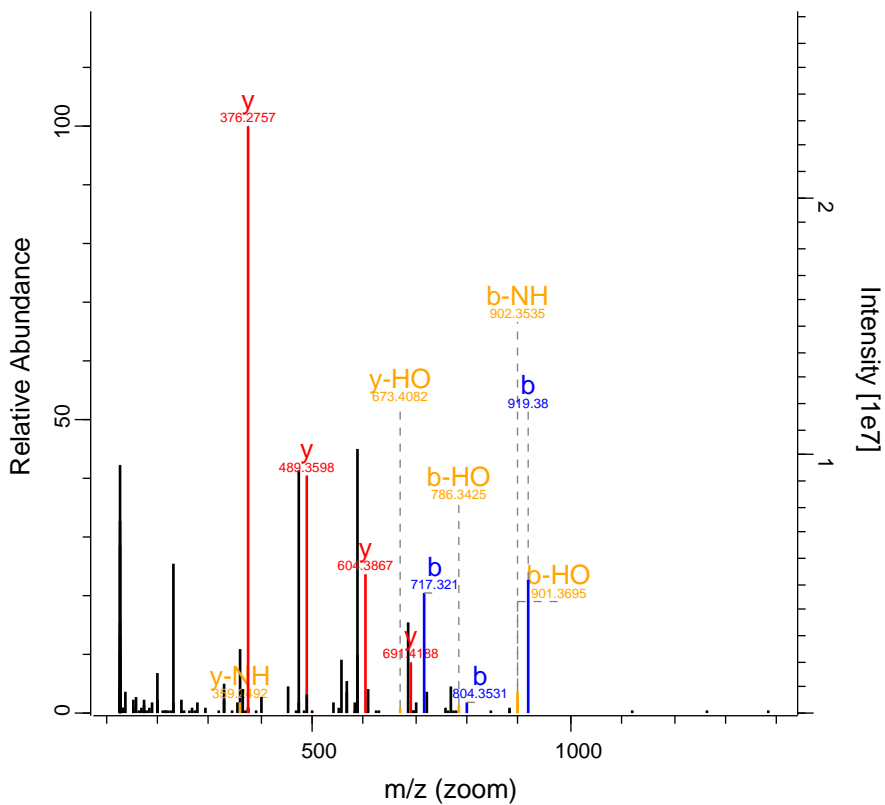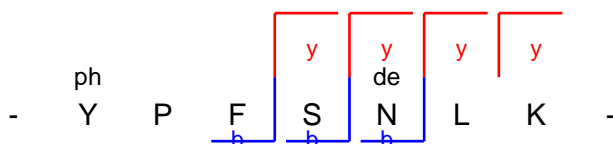

RO-QC-160121\_ZackD\_SS\_Set\_01\_Fractio 10855 FTMS; HC 139.28 637.88 G6PC3

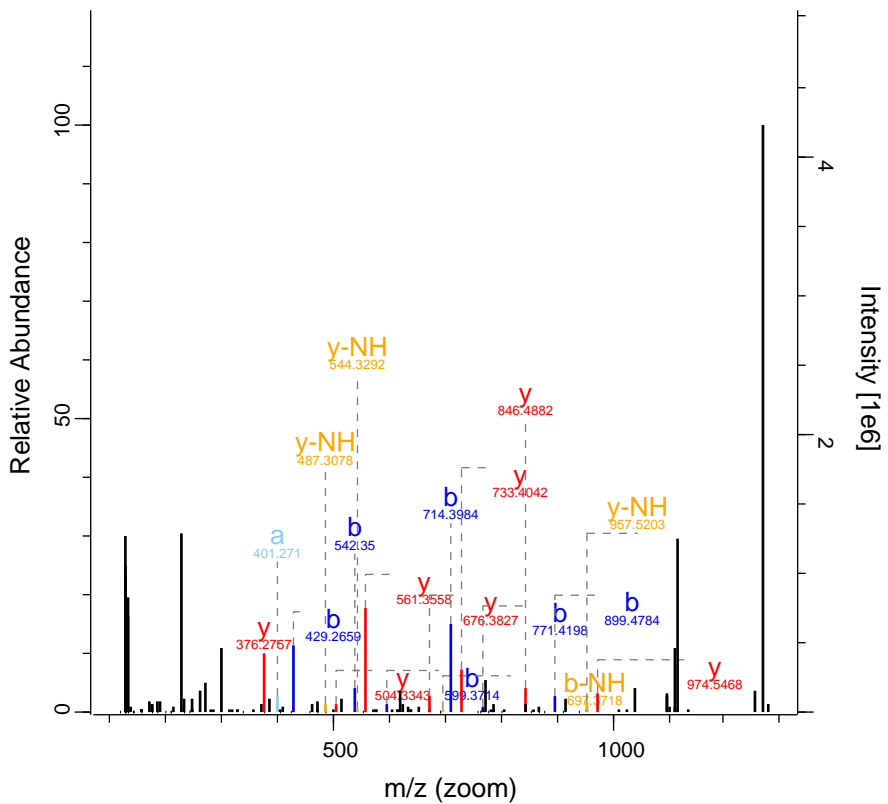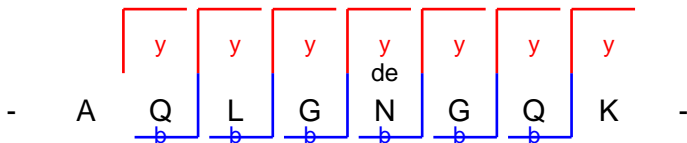

RO-QC-160121\_ZackD\_SS\_Set\_01\_Fractio 11488 FTMS; HC 182.29 739.38 PLP2

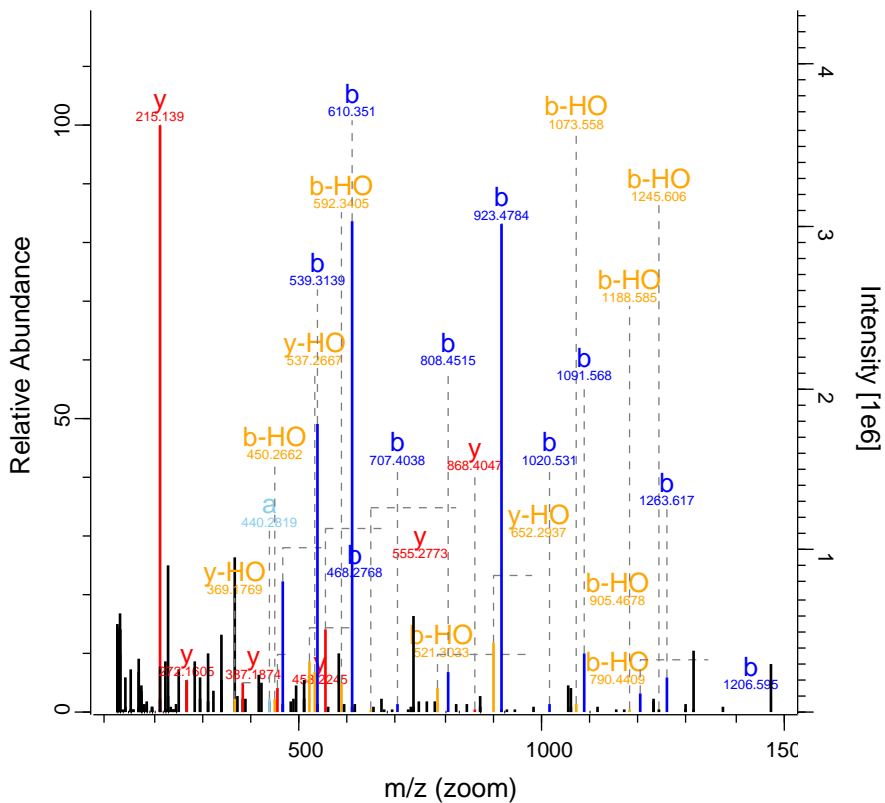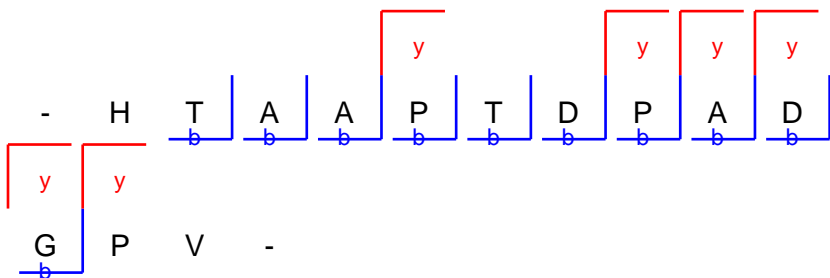



RO-QC-160121\_ZackD\_SS\_Set\_01\_Fractio 11695 FTMS; HC 157.91 739.38 PLP2

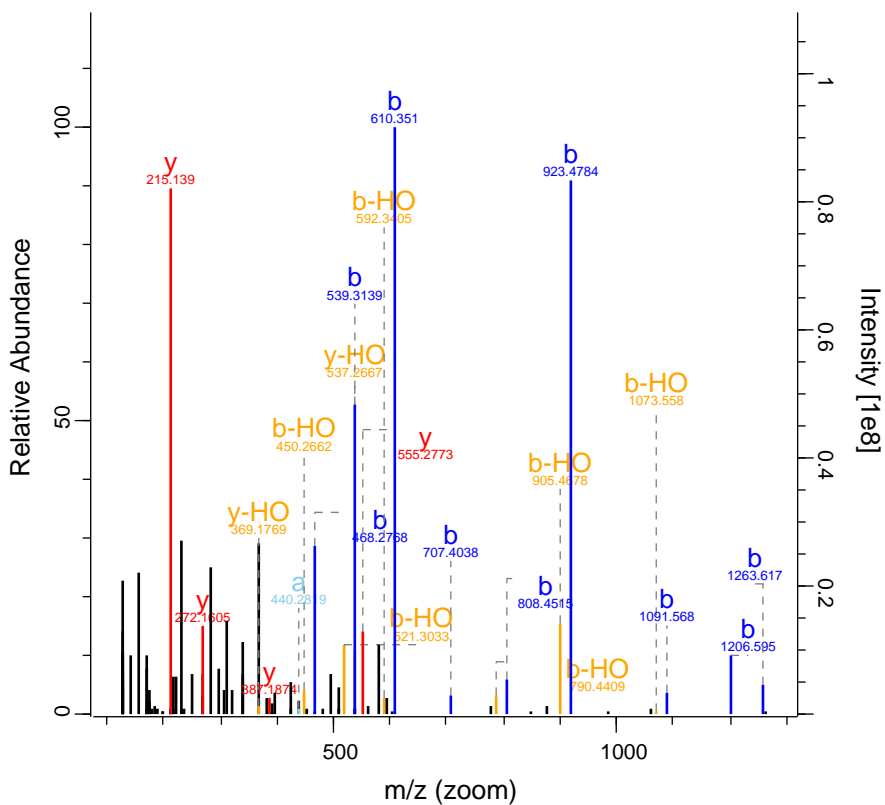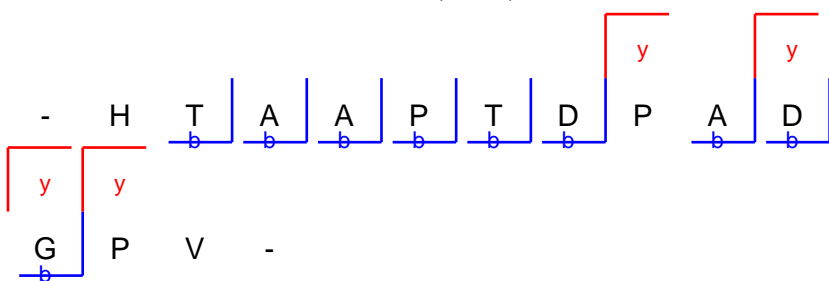

RO-QC-160121\_ZackD\_SS\_Set\_01\_Fraction11937 FTMS; HC 105.1 739.38 PLP2

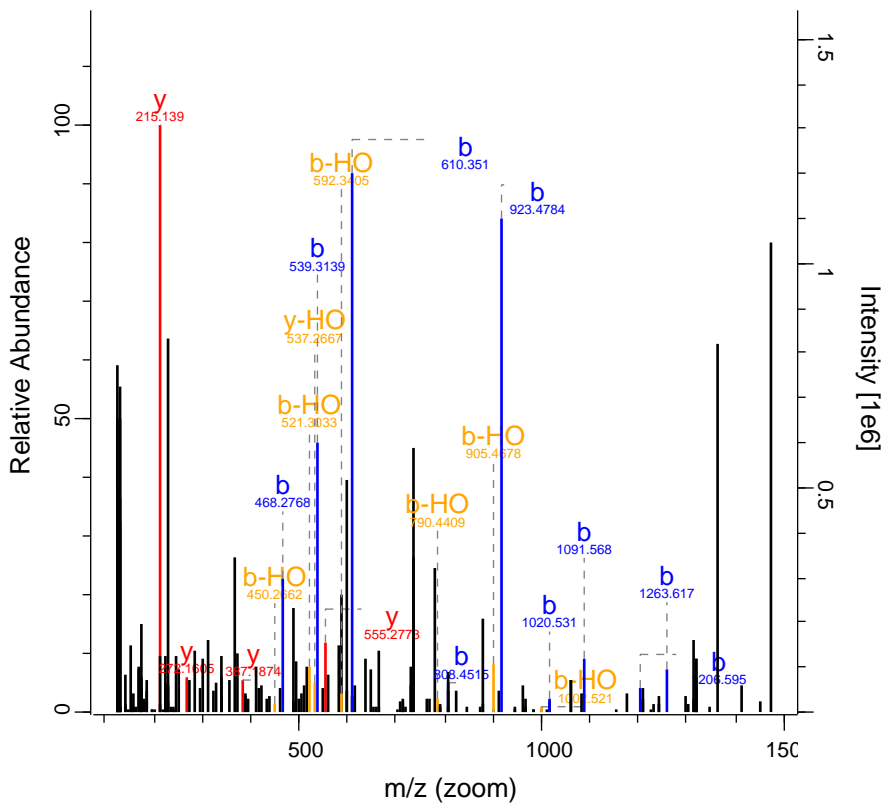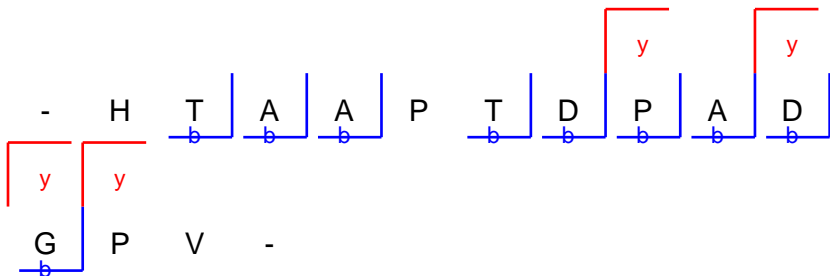

RO-QC-160121\_ZackD\_SS\_Set\_01\_Fraction12664 FTMS; HCl 105.98 778.9 SLC46A1

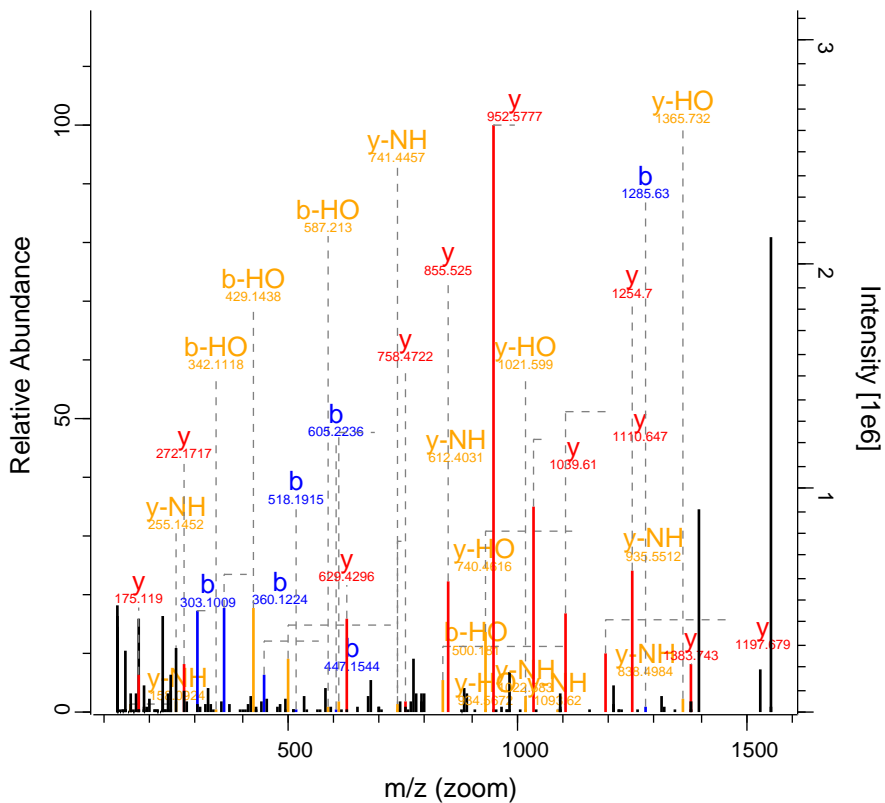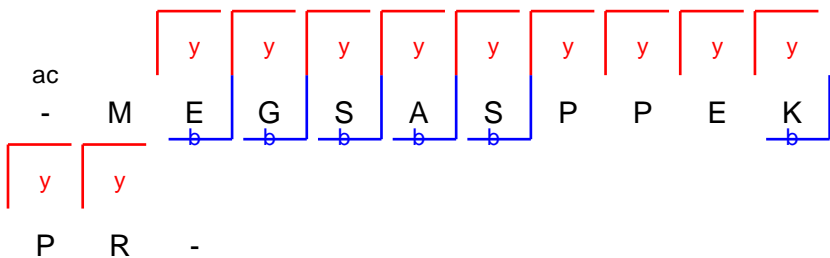

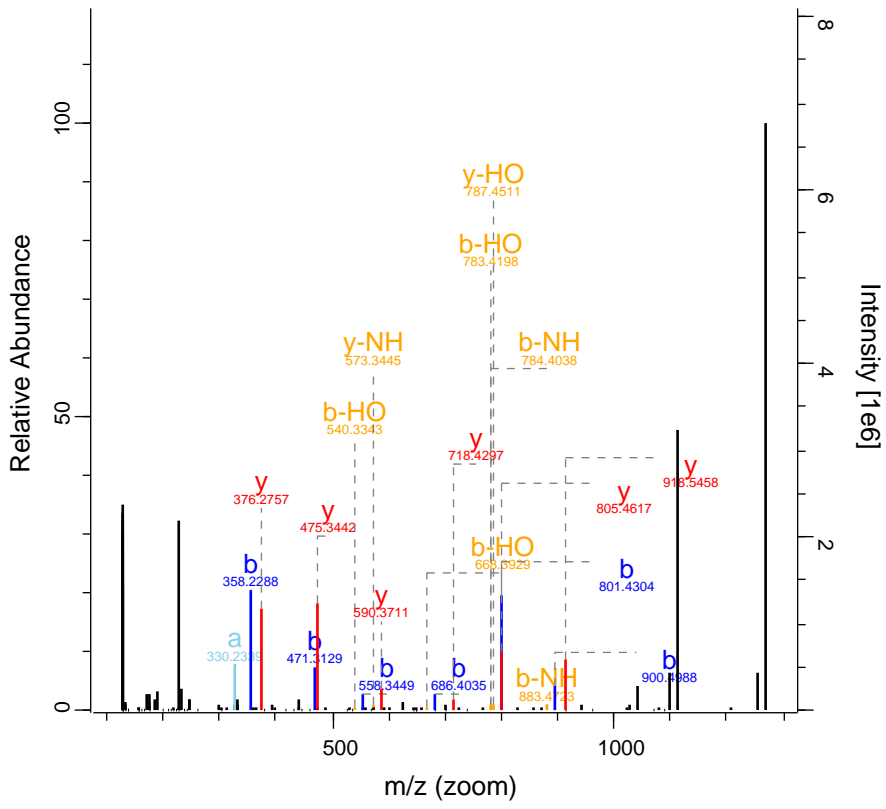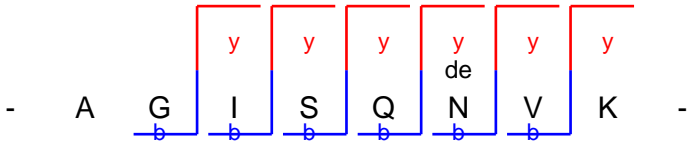

RO-QC-160121\_ZackD\_SS\_Set\_01\_Fraction 13309 FTMS; HC 61.38 600.62 CCHCR1

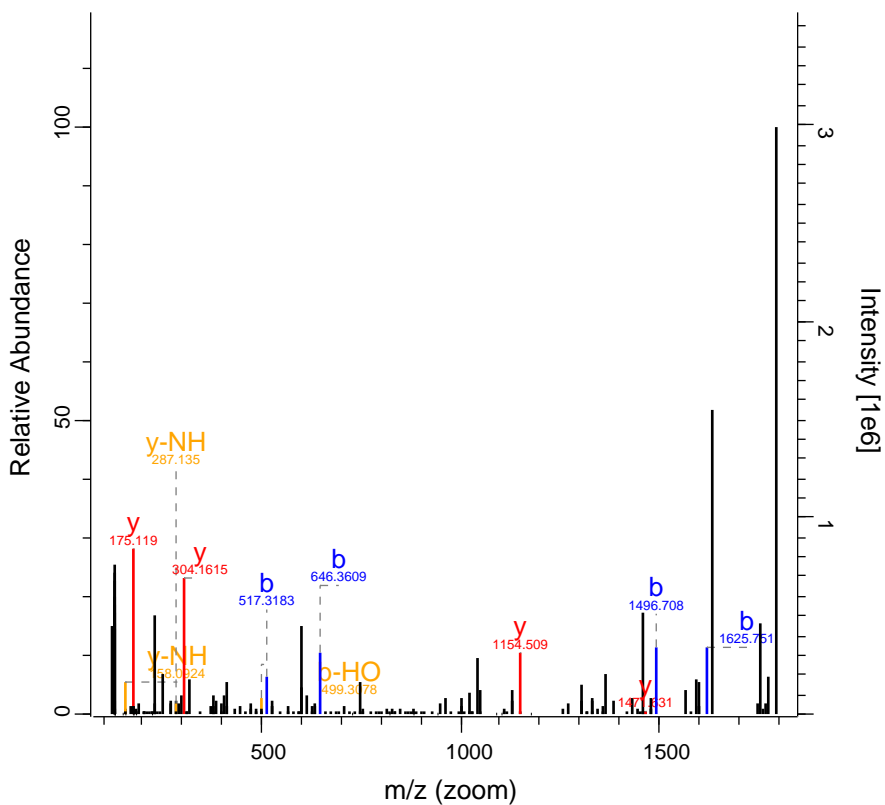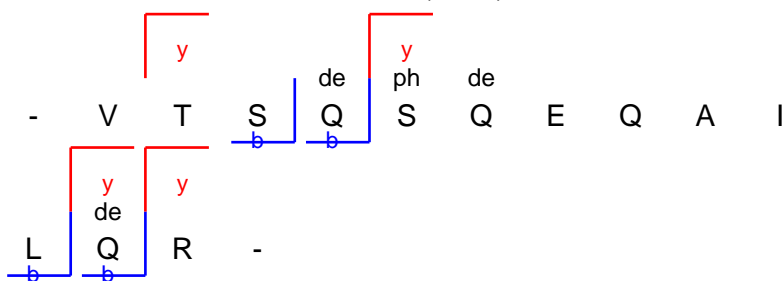

RO-QC-160121\_ZackD\_SS\_Set\_01\_Fraction13584 FTMS; HC 82.27 716.35 CHTF18

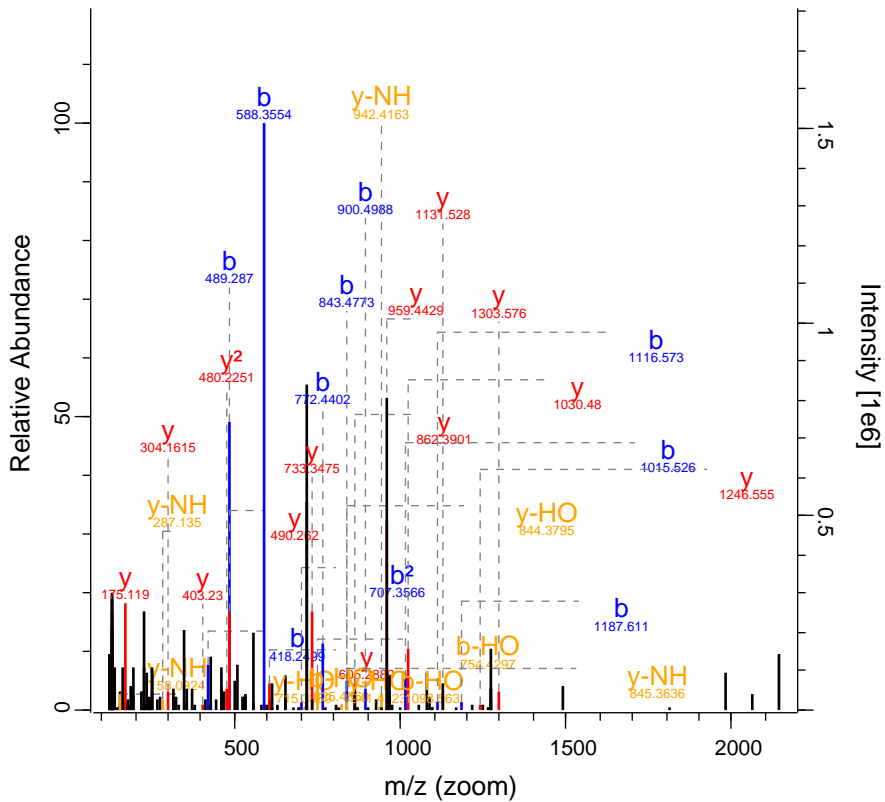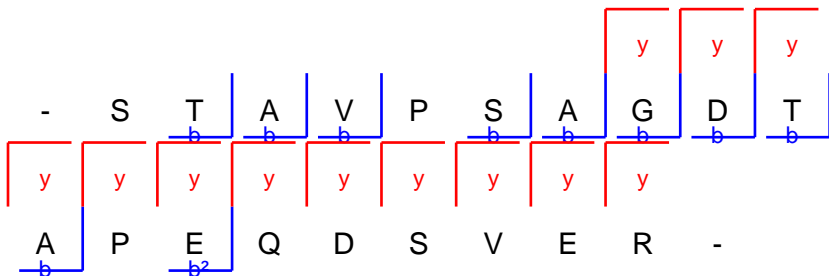

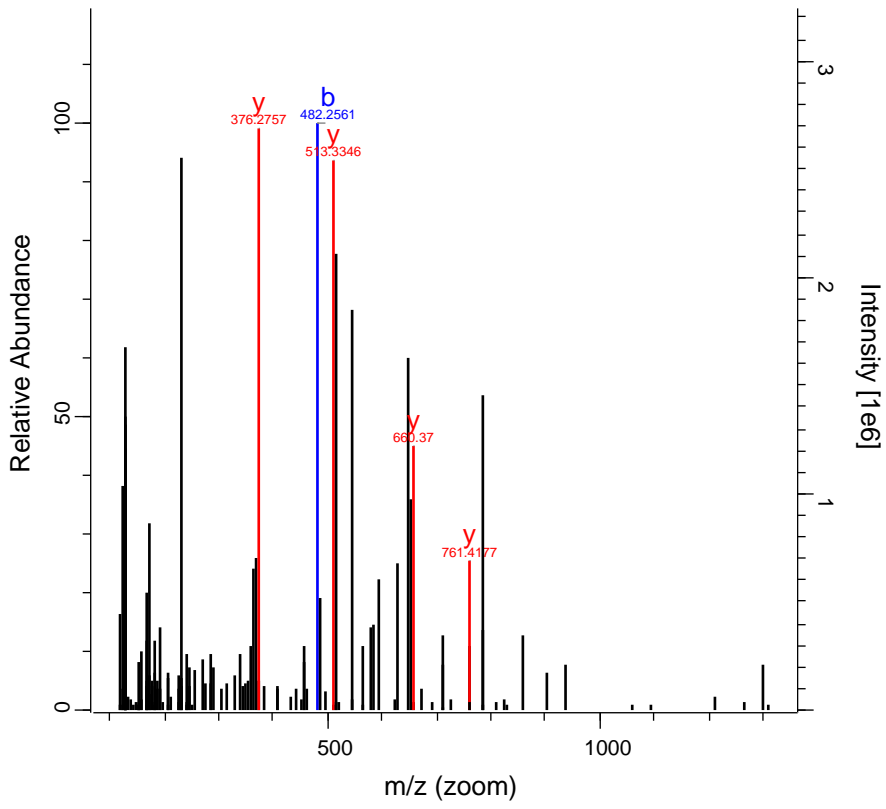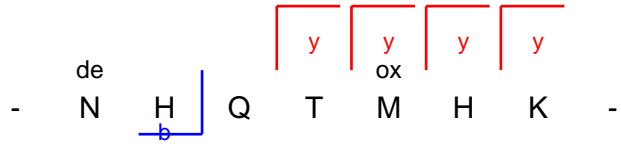

| Raw File                                | Scan  | Method    | Score | m/z    |
|-----------------------------------------|-------|-----------|-------|--------|
| RO-QC-160121_ZackD_SS_Set_01_Fraction_3 | 15216 | FTMS; HCD | 45.08 | 702.36 |

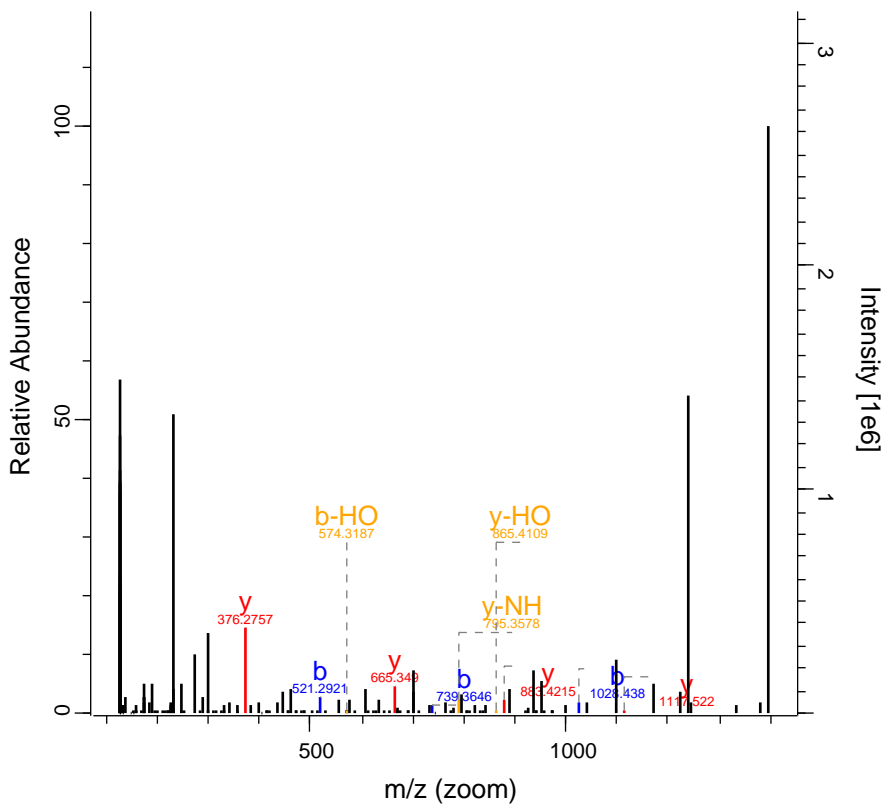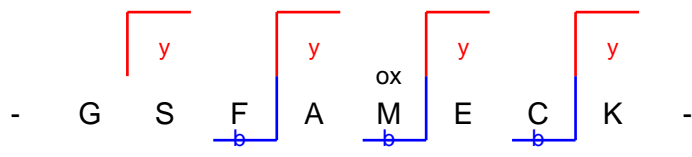



RO-QC-160121\_ZackD\_SS\_Set\_01\_Fraction 15248 FTMS; HC 59.35 403.98 BPIFB4

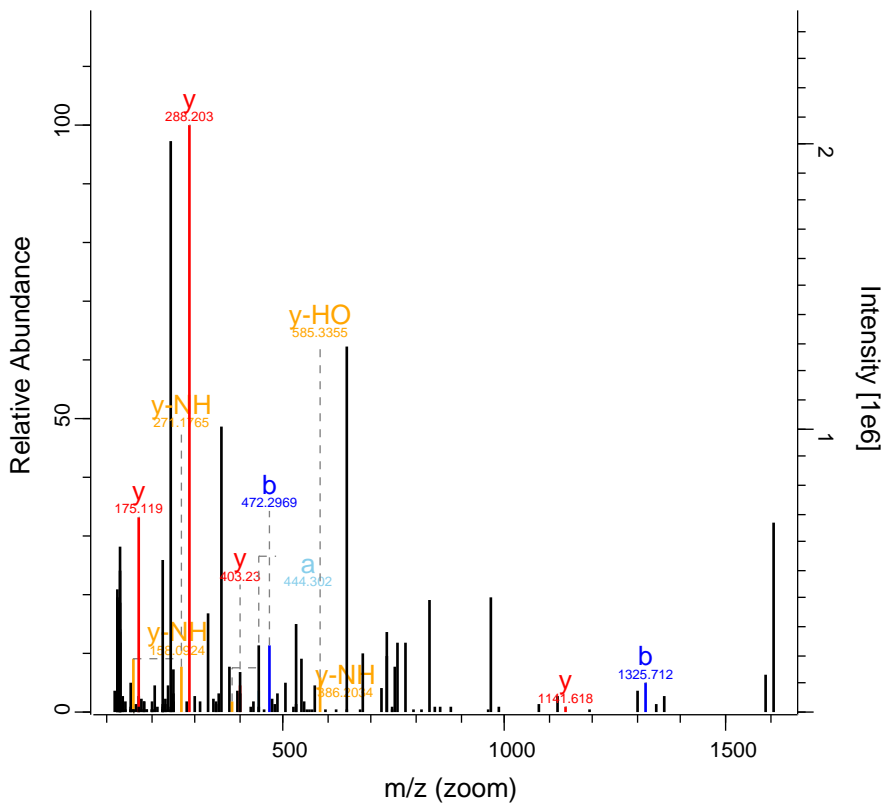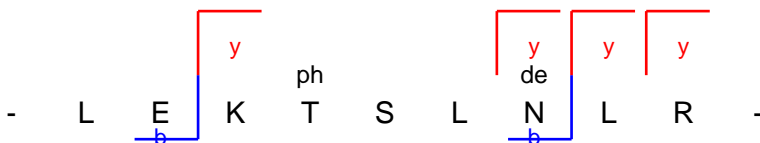

RO-QC-160121\_ZackD\_SS\_Set\_01\_Fractio 15930 FTMS; HC 119.18 719.74 ARMCX5

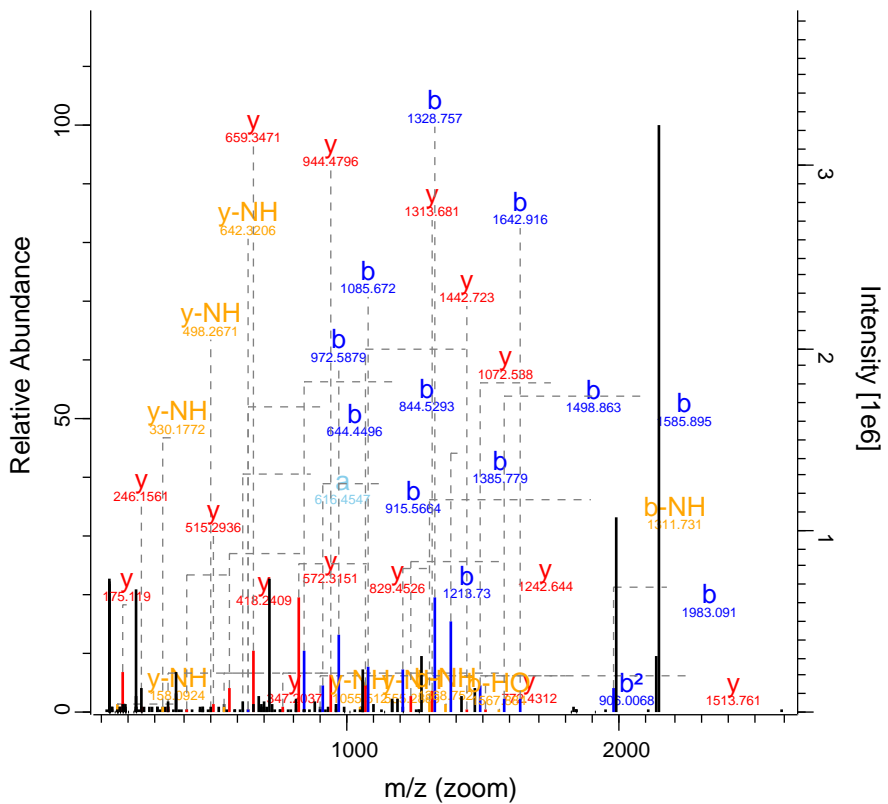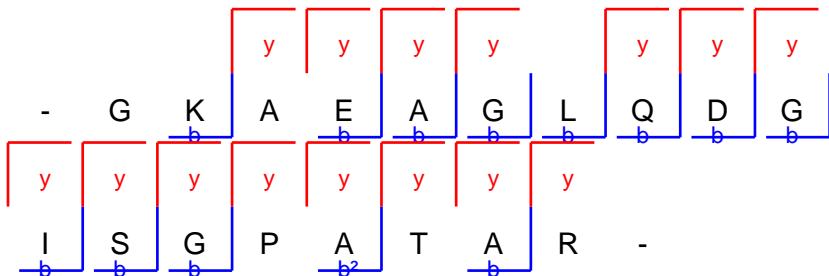

RO-QC-160121\_ZackD\_SS\_Set\_01\_Fraction 16108 FTMS; HC 93.14 703.41 ATG12

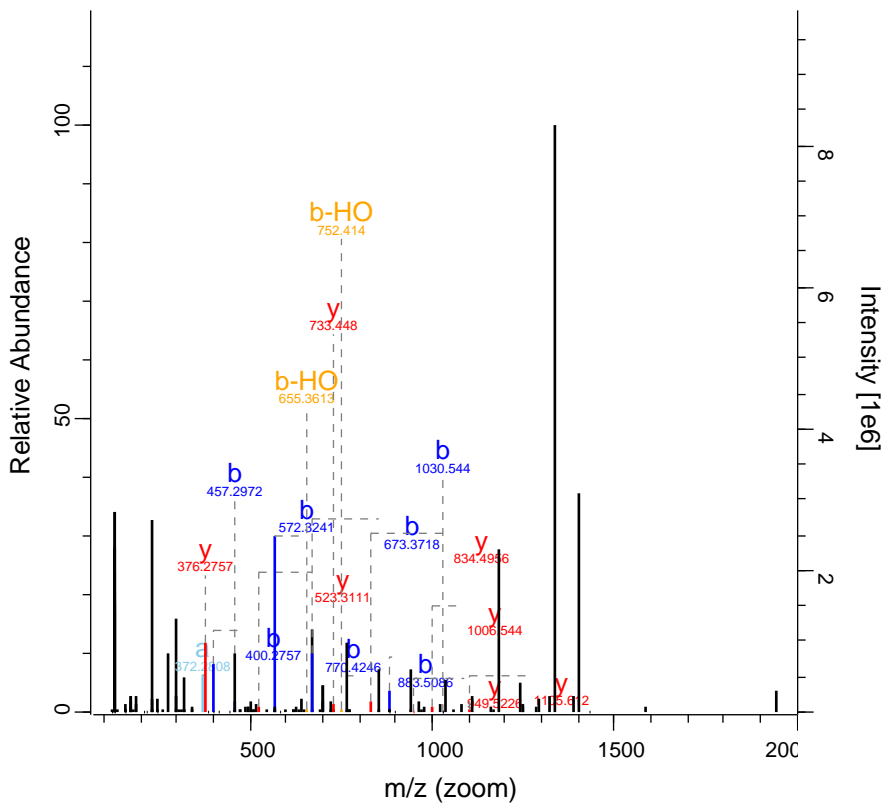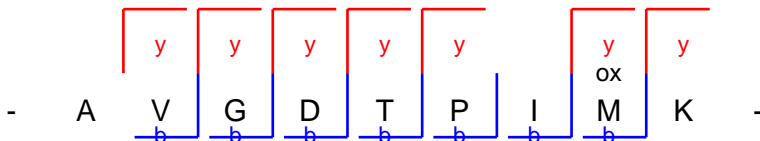

RO-QC-160121\_ZackD\_SS\_Set\_01\_Fraction 16153 FTMS; HC 69.82 469.28 ATG12

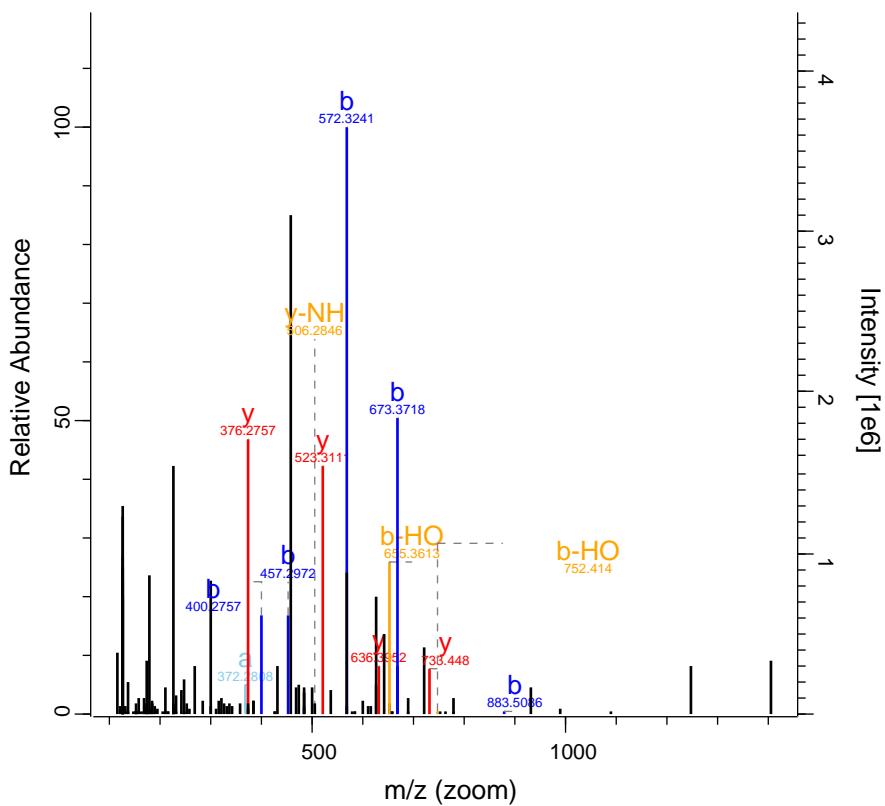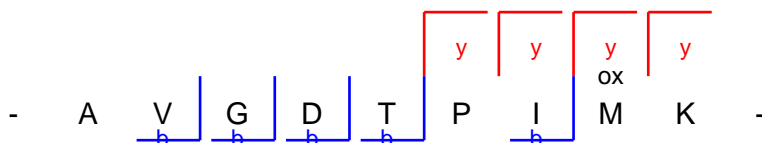

RO-QC-160121\_ZackD\_SS\_Set\_01\_Fraction 16367 FTMS; HCl 57.41 691.3 TOR1AIP2

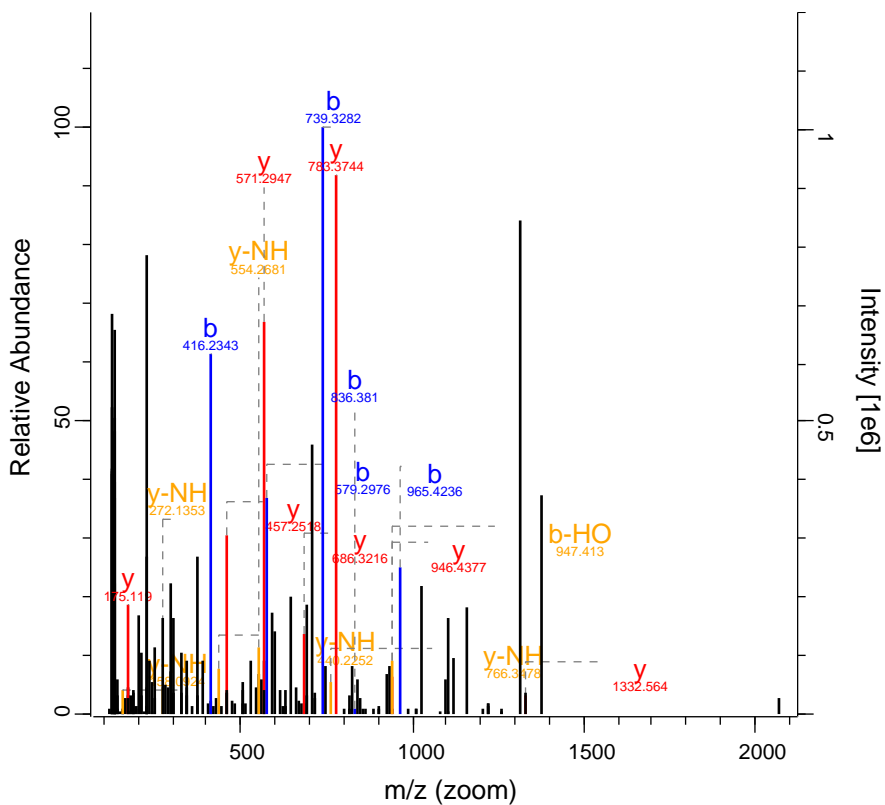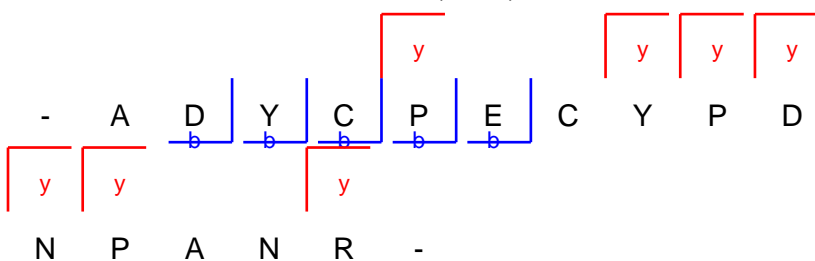

N P A N R -

RO-QC-160121\_ZackD\_SS\_Set\_01\_Fractic 16381 FTMS; HC 126.19 1036.45 TOR1AIP2

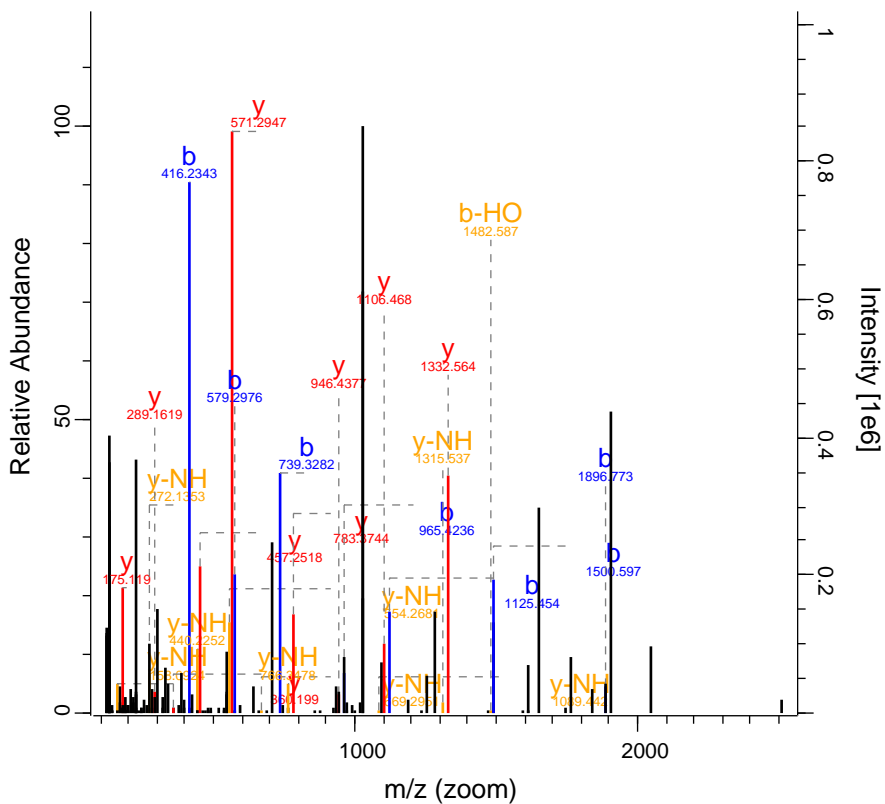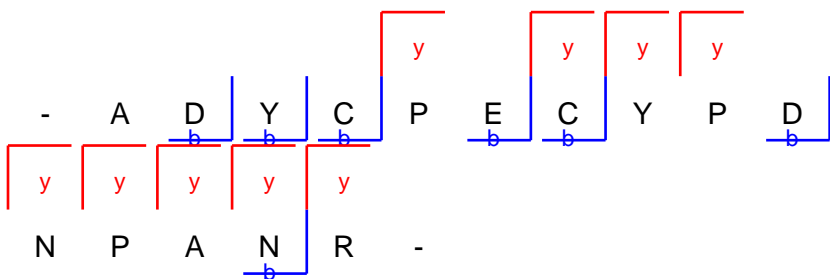

RO-QC-160121\_ZackD\_SS\_Set\_01\_Fractio 16784 FTMS; HC 138.77 705.39 PQLC1

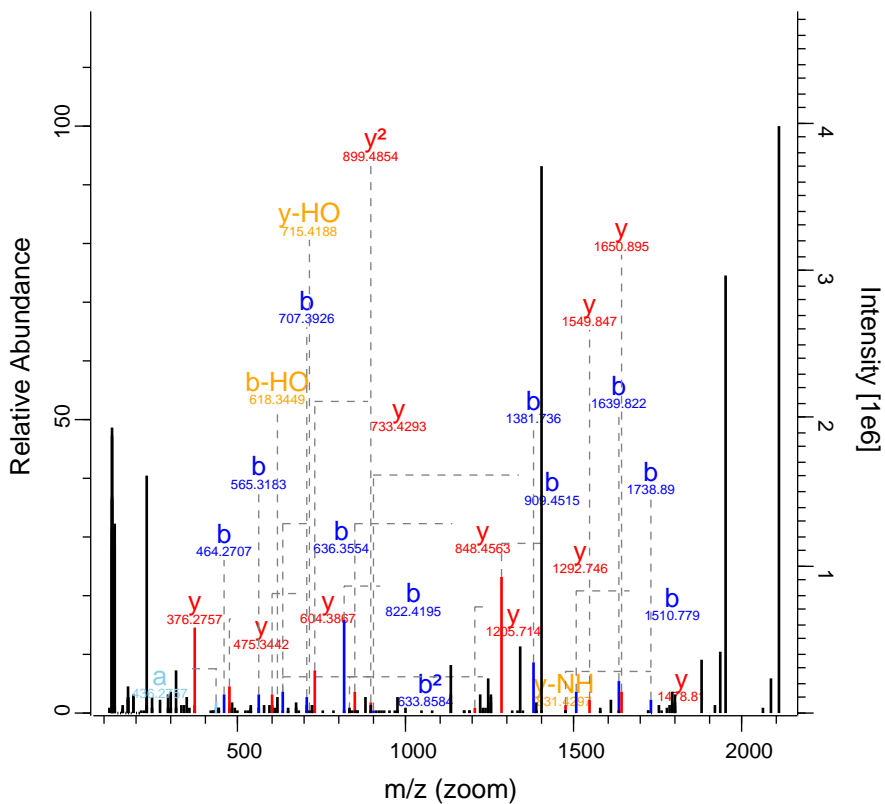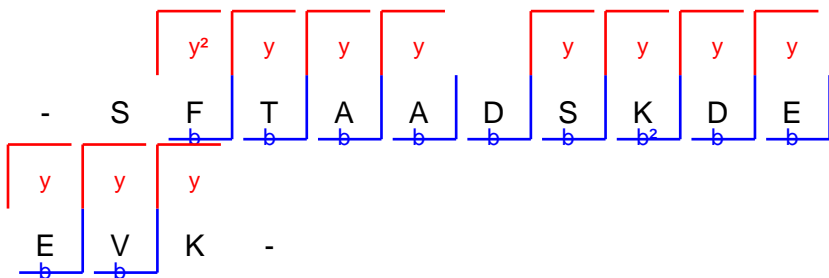

RO-QC-160121\_ZackD\_SS\_Set\_01\_Fractio 17782 FTMS; HC 188.04 707.38 MFSD1

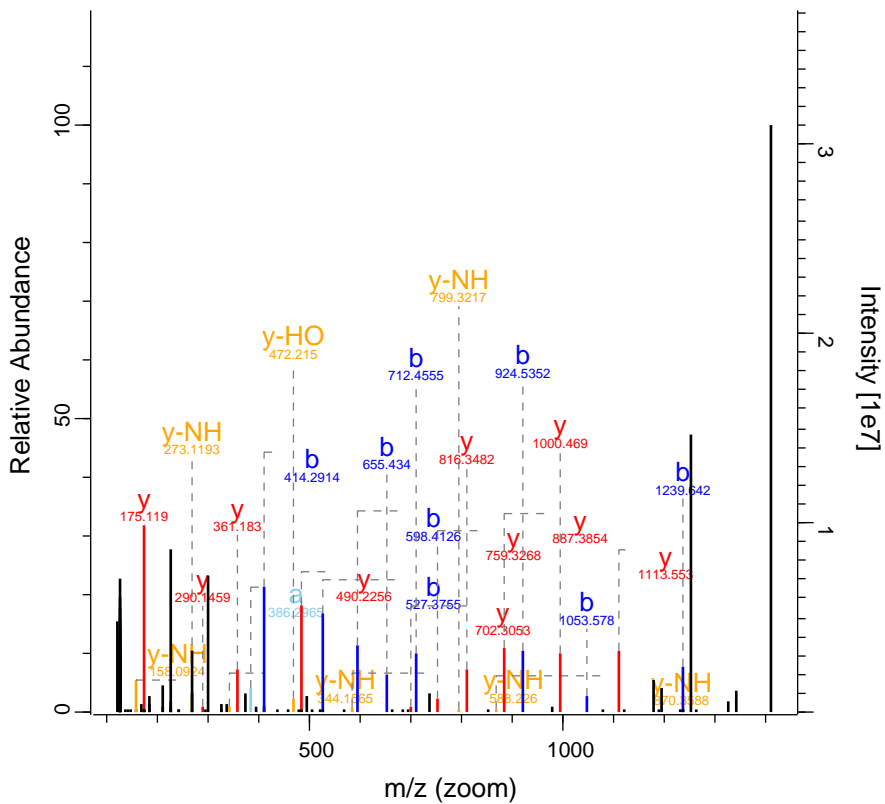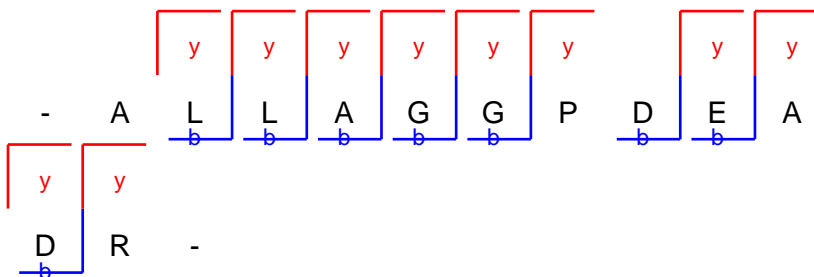



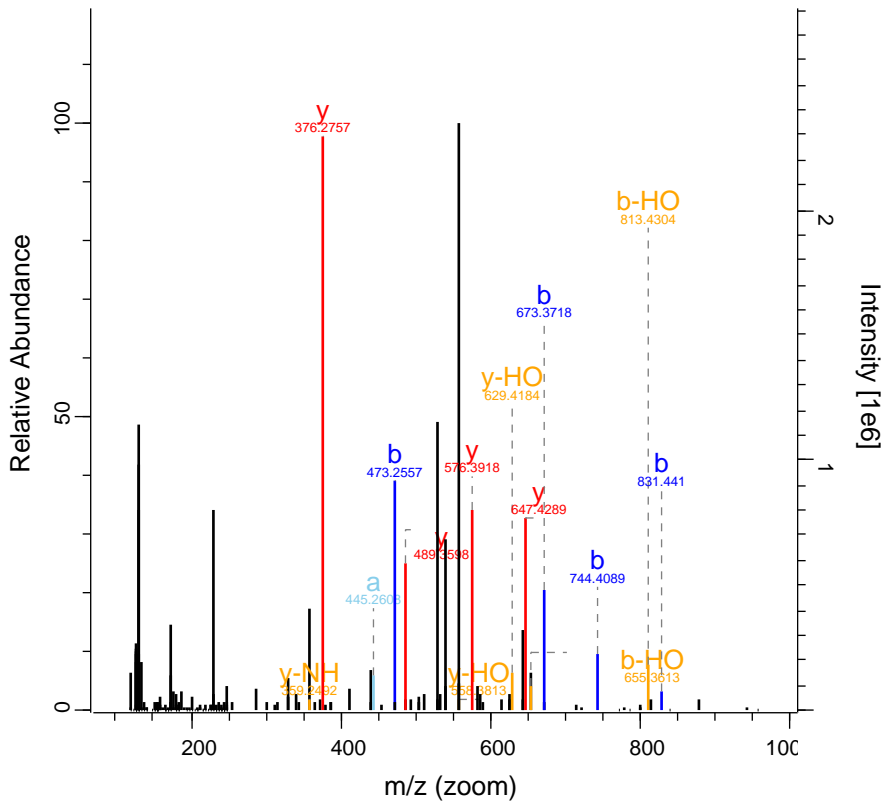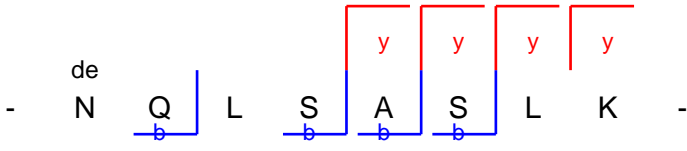

RO-QC-160121\_ZackD\_SS\_Set\_01\_Fractio 18051 FTMS; HC 107.75 752.09 CERS1

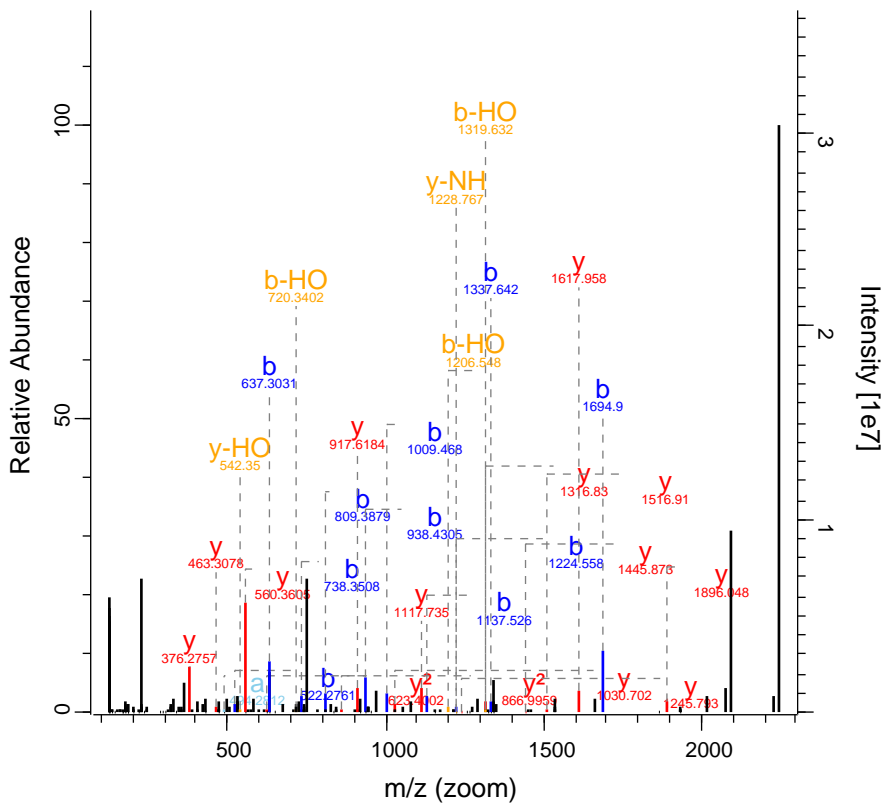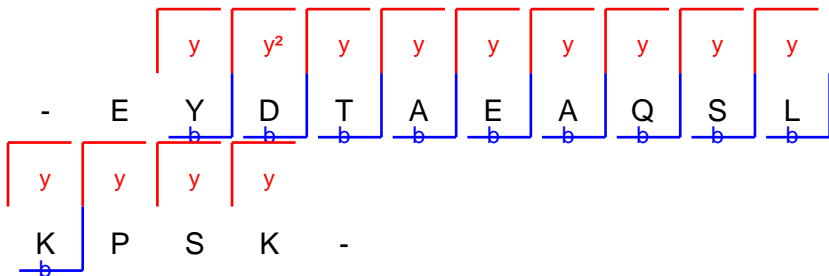

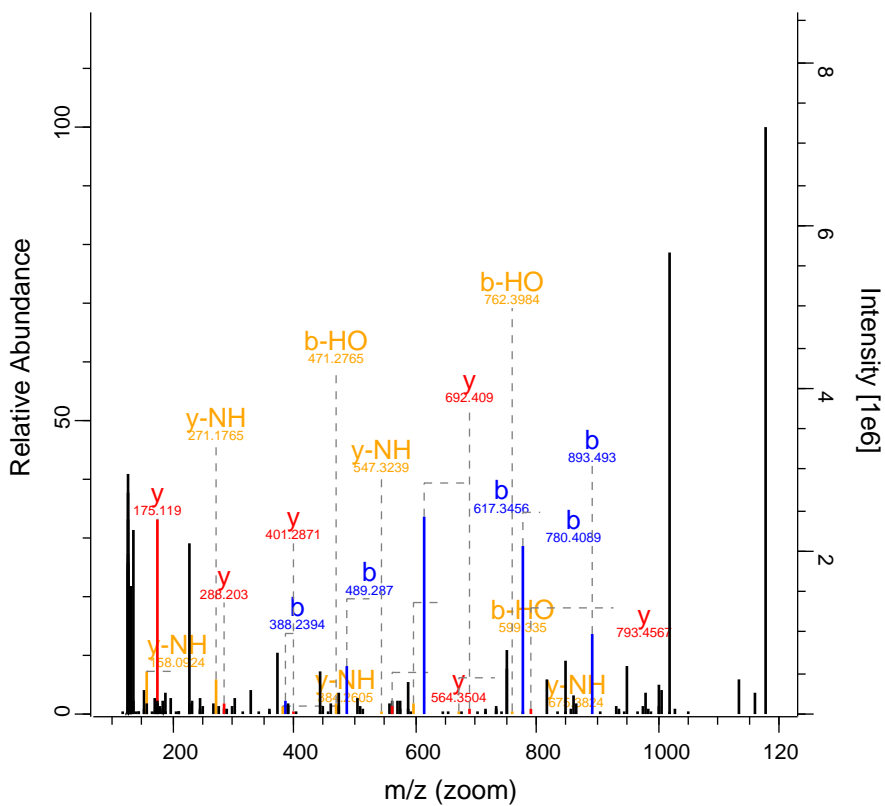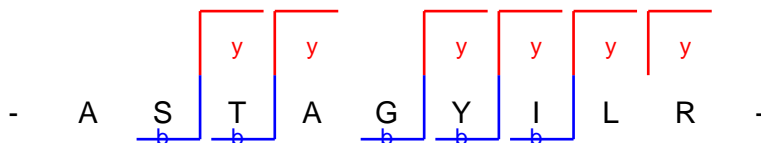

RO-QC-160121\_ZackD\_SS\_Set\_01\_Fraction 18080 FTMS; HC 66.53 564.57 CERS1

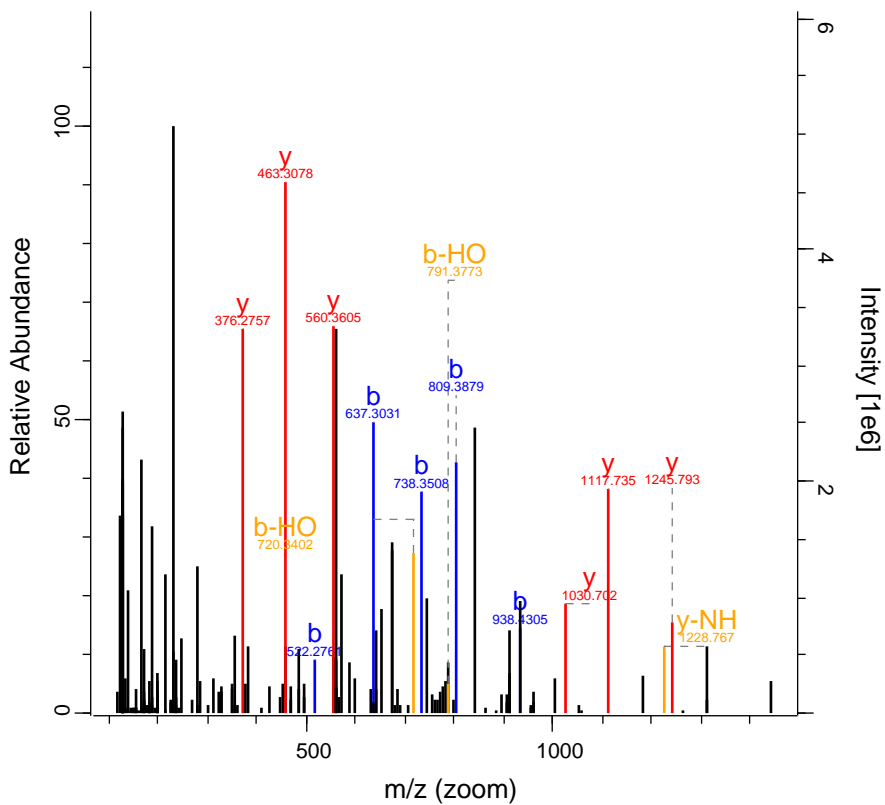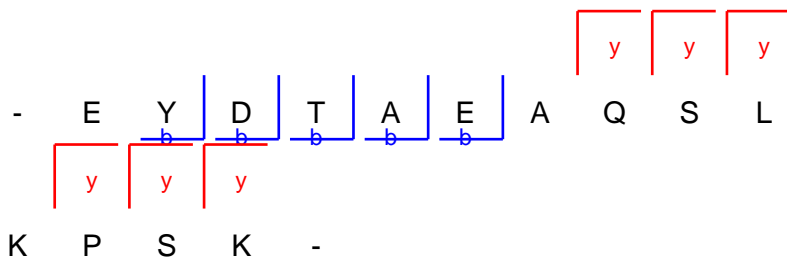

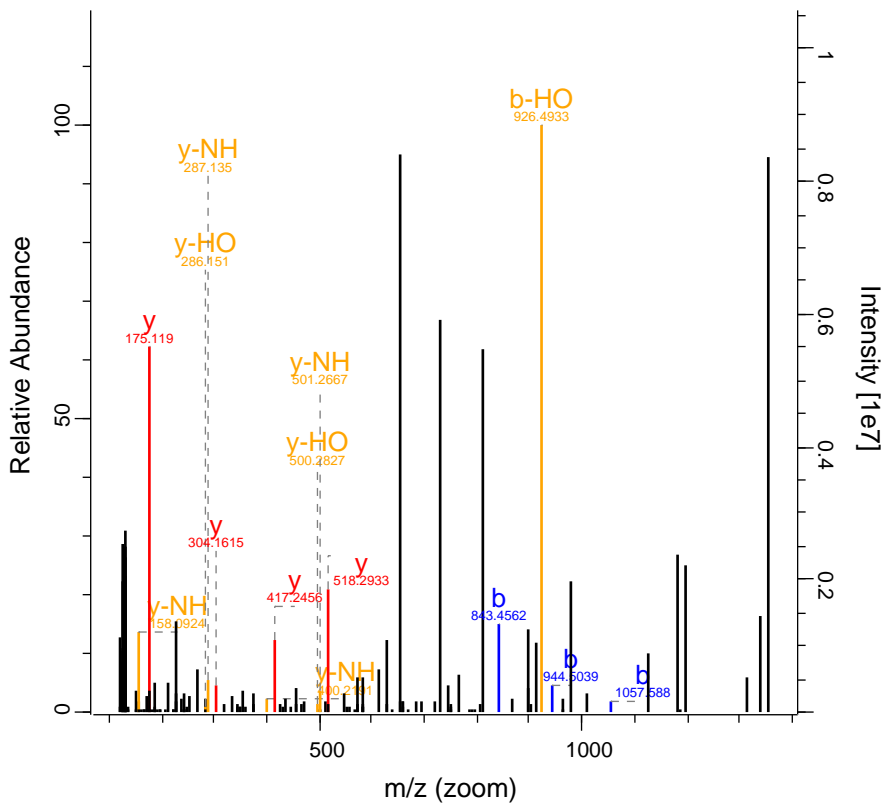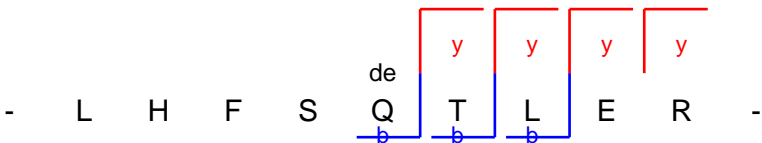

RO-QC-160121\_ZackD\_SS\_Set\_01\_Fraction 18916 FTMS; HC 95.5 452.58 HBB;HBD

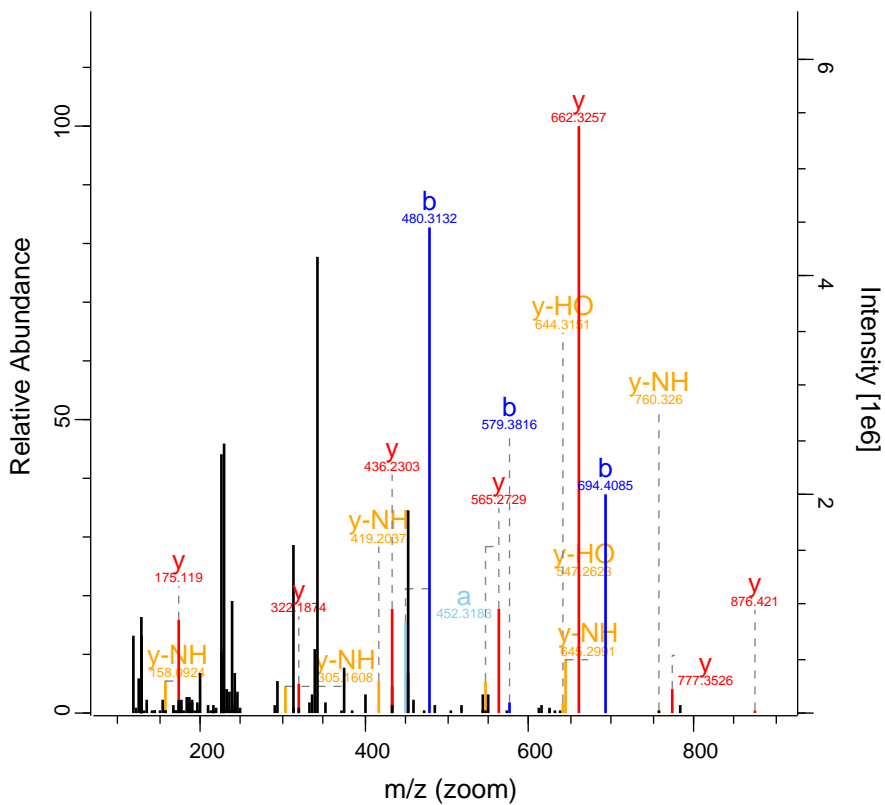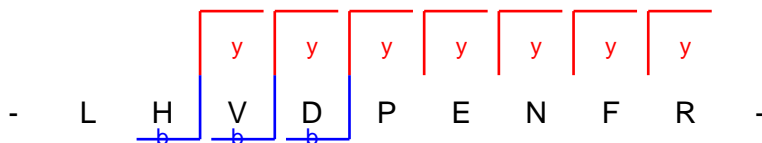

RO-QC-160121\_ZackD\_SS\_Set\_01\_Fraction1 19123 FTMS; HCl47.09 800.1 ATP6V0C

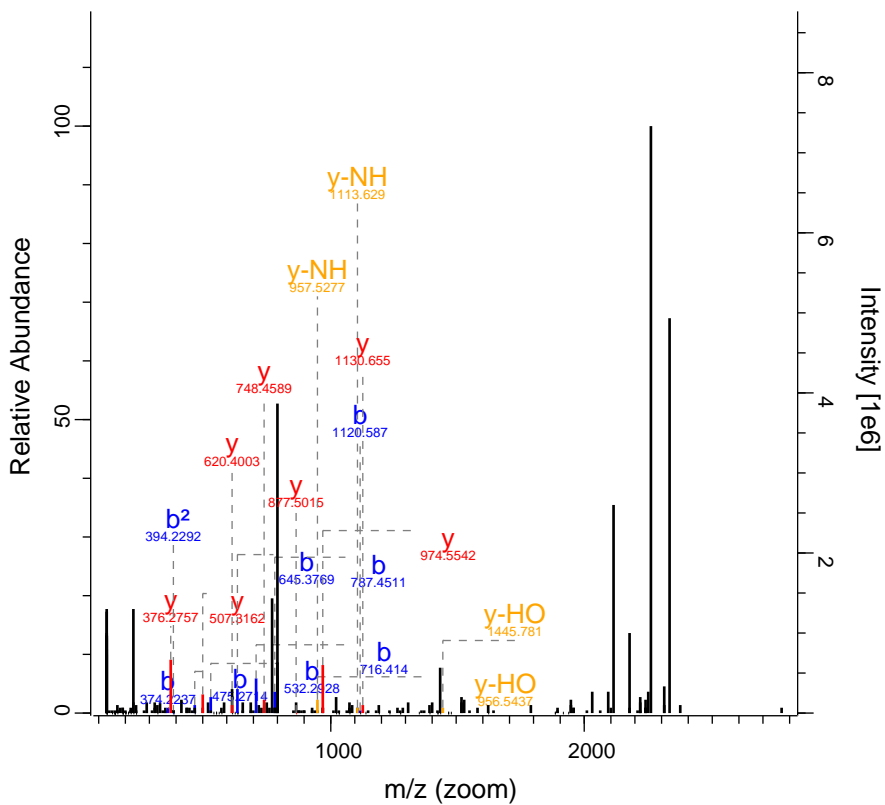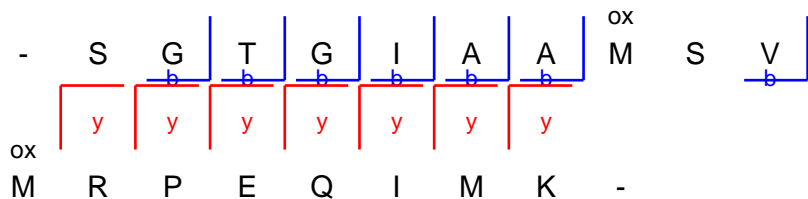

RO-QC-160121\_ZackD\_SS\_Set\_01\_Fractio 19471 FTMS; HC 122.45 657.02 FGF1

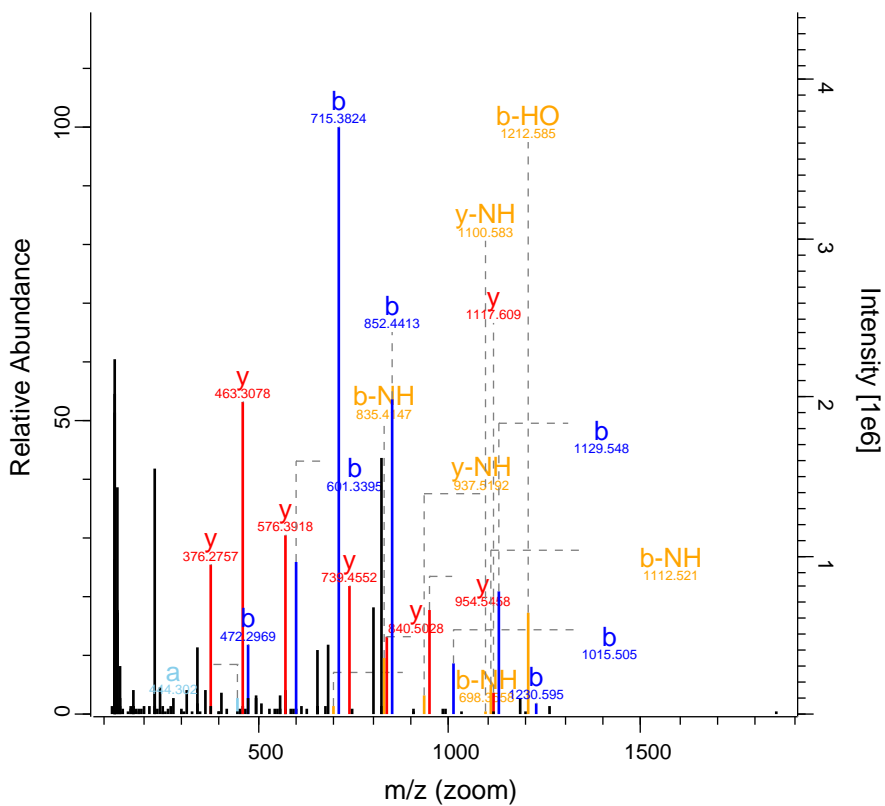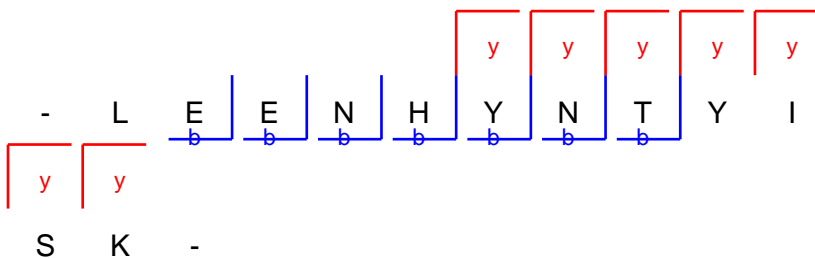



RO-QC-160121\_ZackD\_SS\_Set\_01\_Fractio 19658 FTMS; HC 150.09 913.11 SOD3

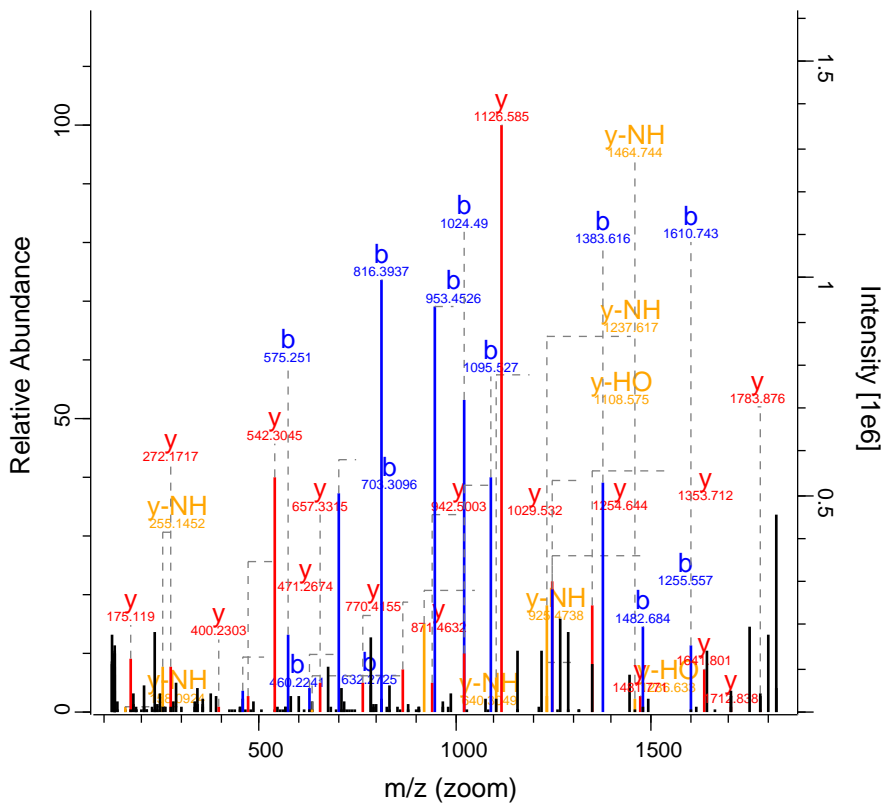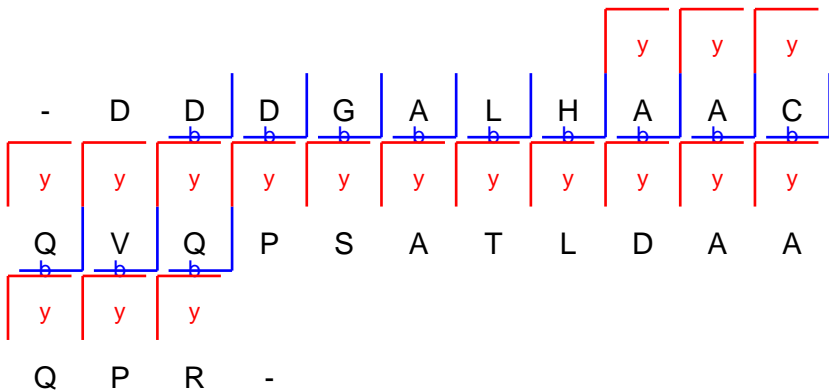

RO-QC-160121\_ZackD\_SS\_Set\_01\_Fraction1 20356 FTMS; HCl 137.89 498.3 SIPA1L2

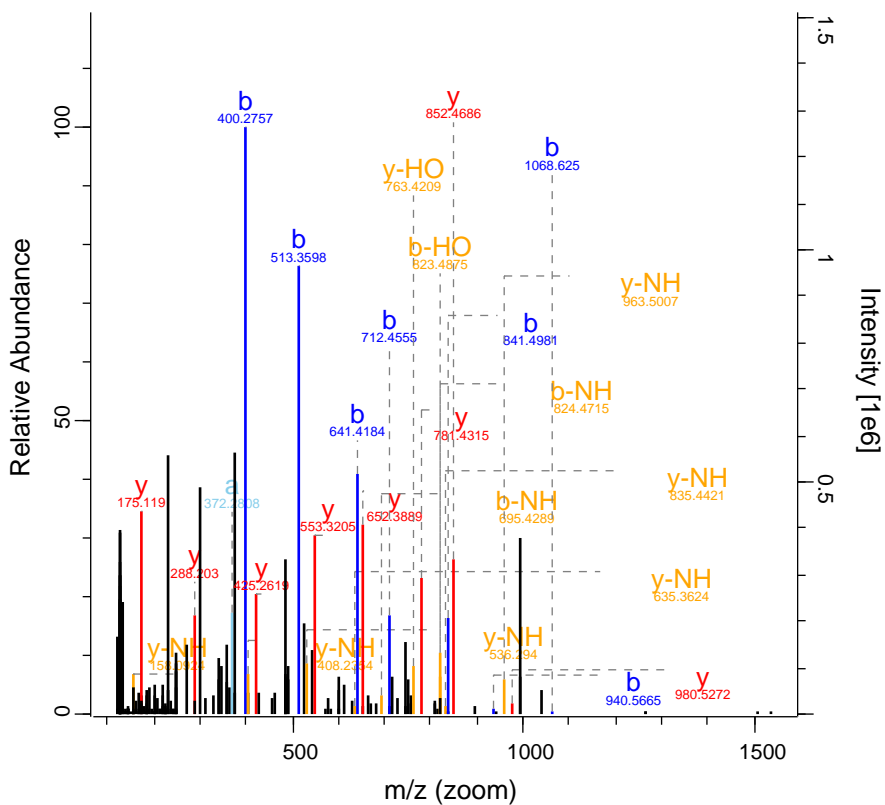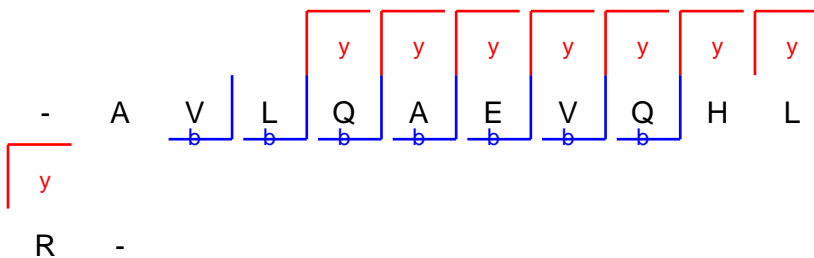

RO-QC-160121\_ZackD\_SS\_Set\_01\_Fractio 20433 FTMS; HC 113.44 781.46 PASK

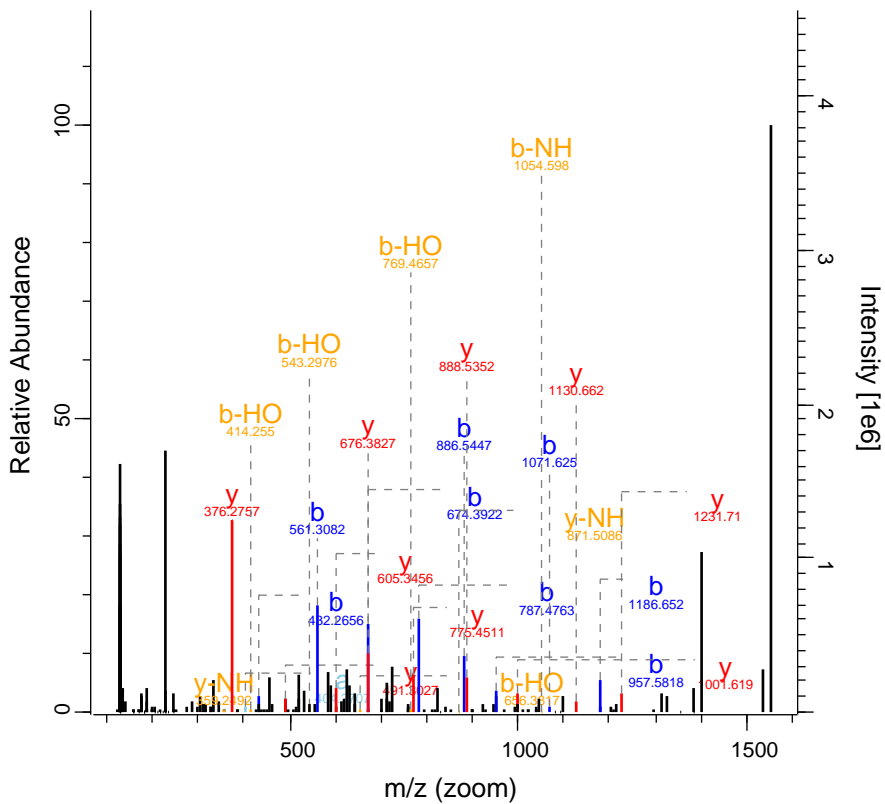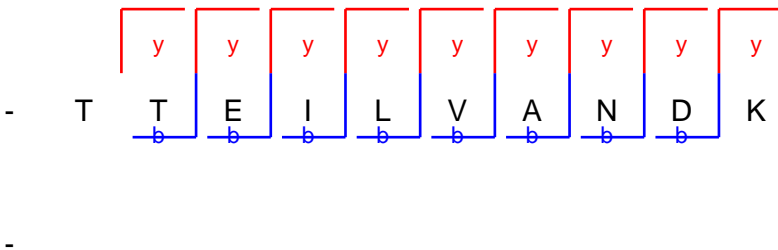

RO-QC-160121\_ZackD\_SS\_Set\_01\_Fractio 21092 FTMS; HC 108.98 741.44 KRT80

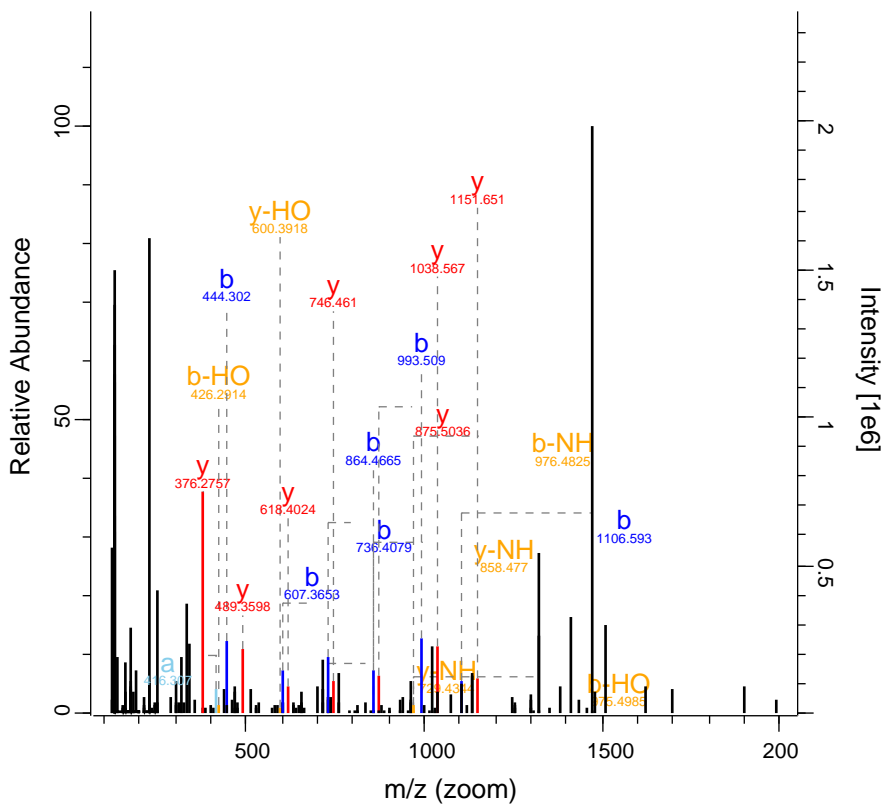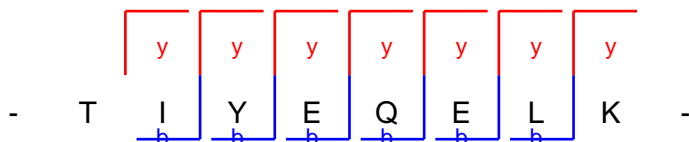

RO-QC-160121\_ZackD\_SS\_Set\_01\_Fraction 21112 FTMS; HC 73.93 637.36 RHOBTB3

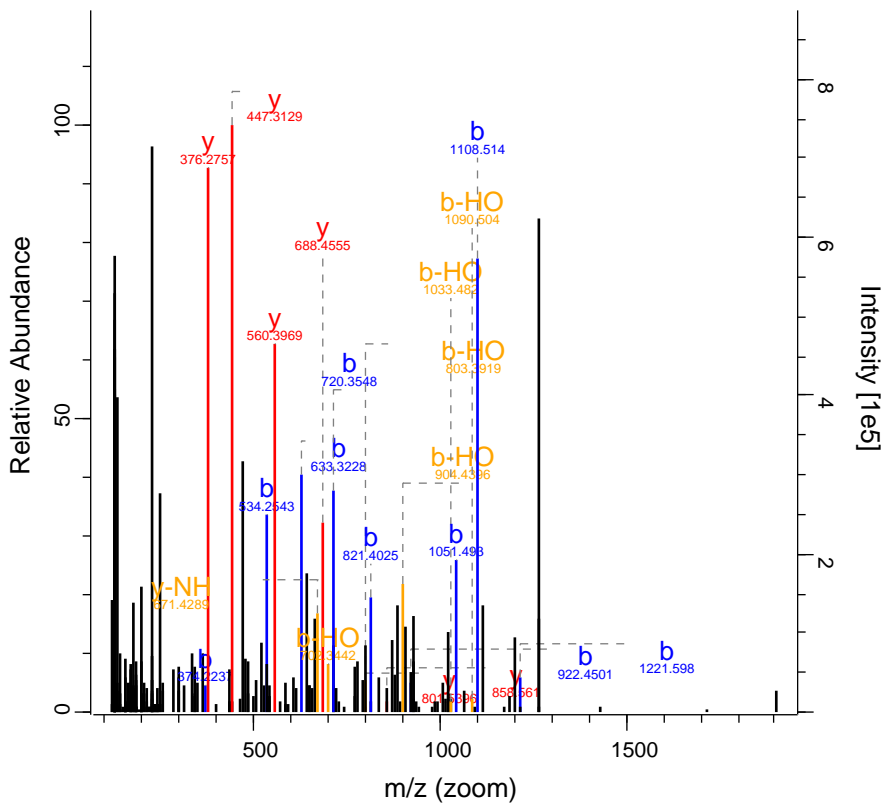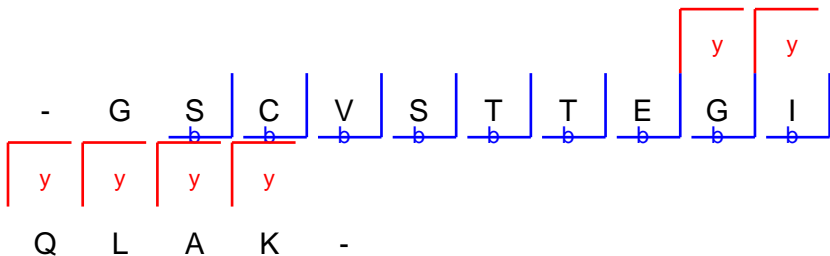

RO-QC-160121\_ZackD\_SS\_Set\_01\_Fractio 21140 FTMS; HC 101.71 955.03 RHOBTB3

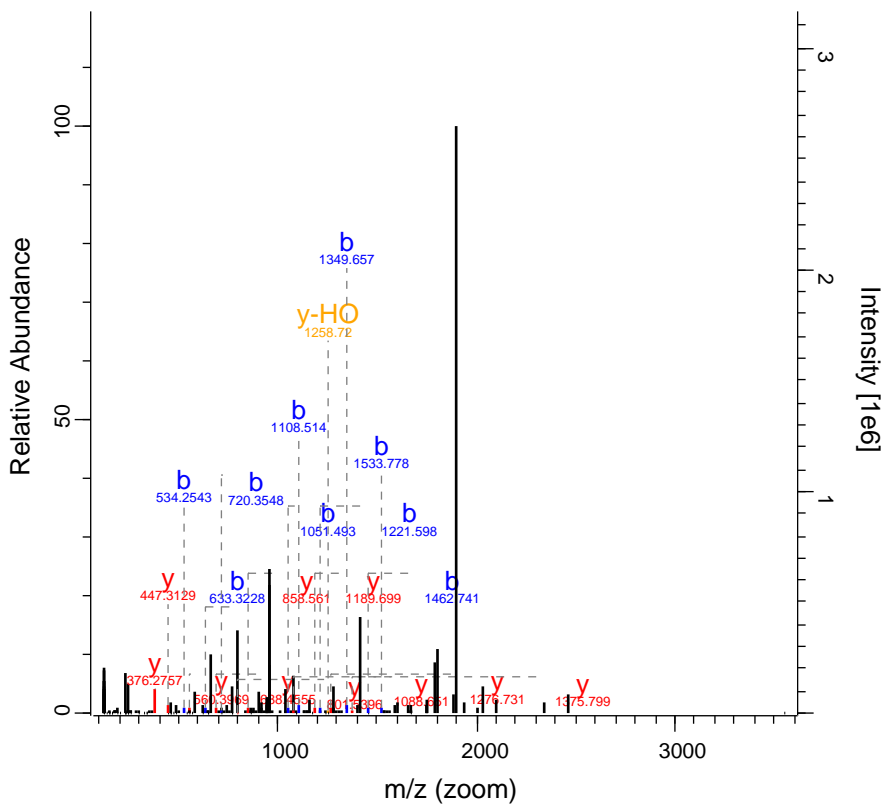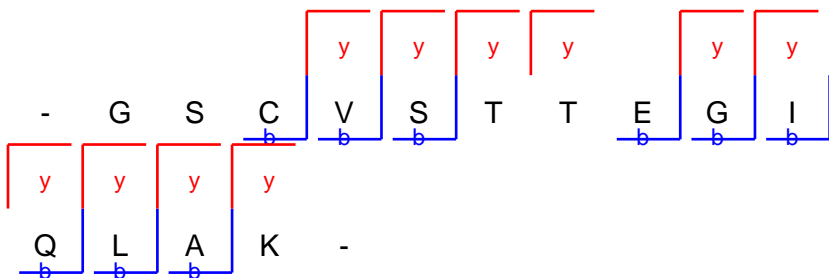

Raw File

Scan Method Score m/z

RO-QC-160121\_ZackD\_SS\_Set\_01\_Fraction\_3

21382 FTMS; HCD 49.42 874.5

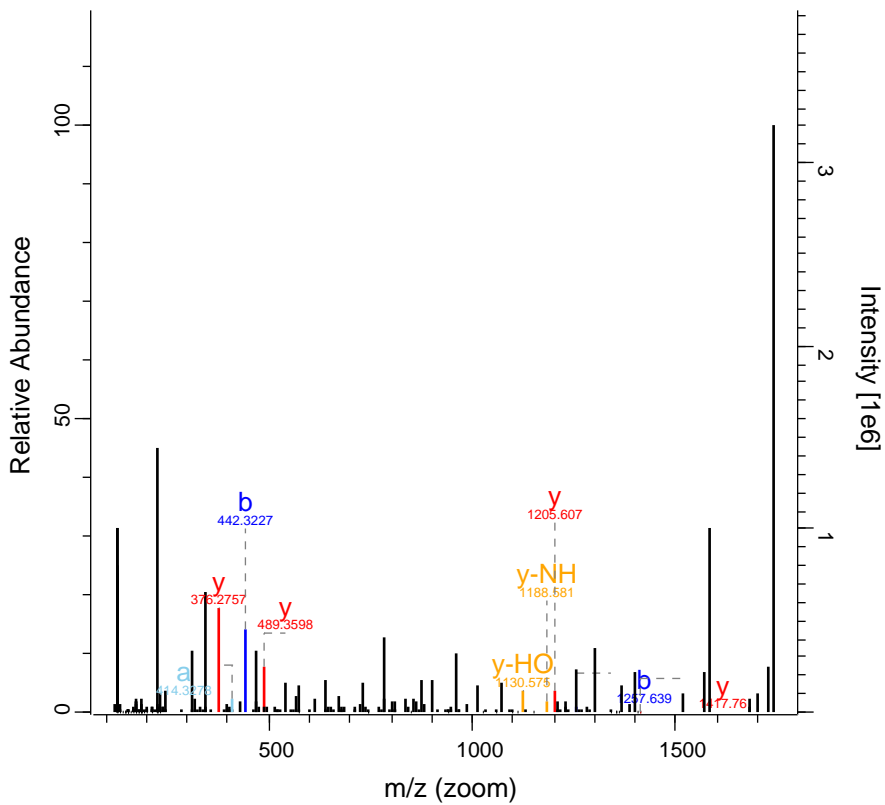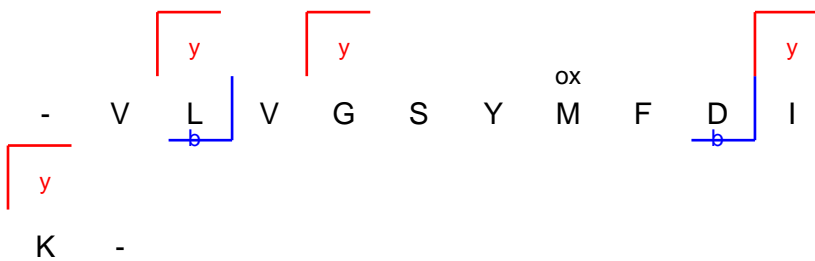

RO-QC-160121\_ZackD\_SS\_Set\_01\_Fraction 22036 FTMS; HC 82.17 927.02 EPN2

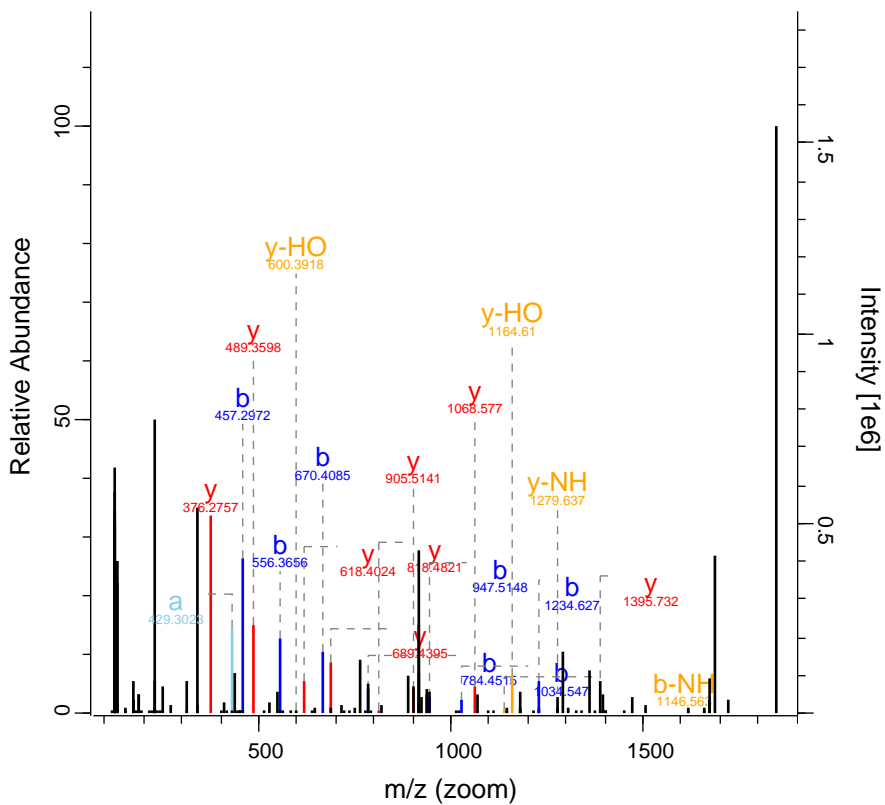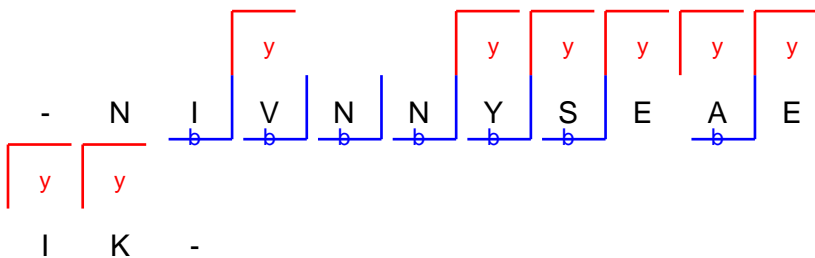



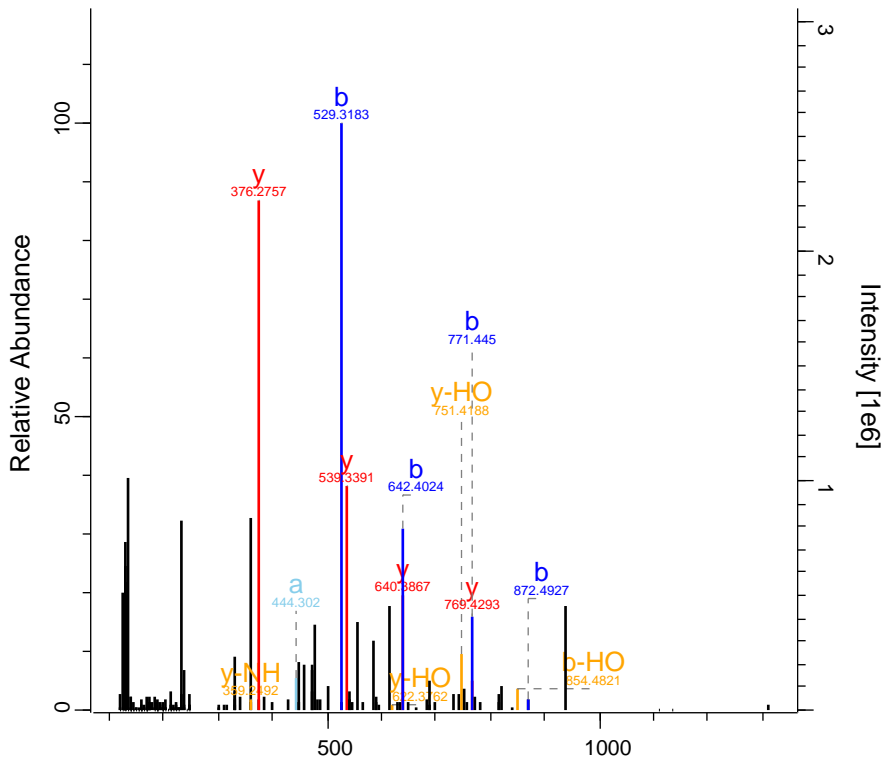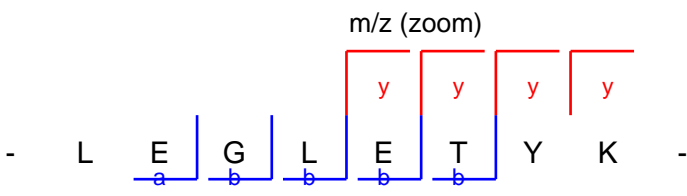

RO-QC-160121\_ZackD\_SS\_Set\_01\_Fraction 23230 FTMS; HC 94.85 810.96 CASC5

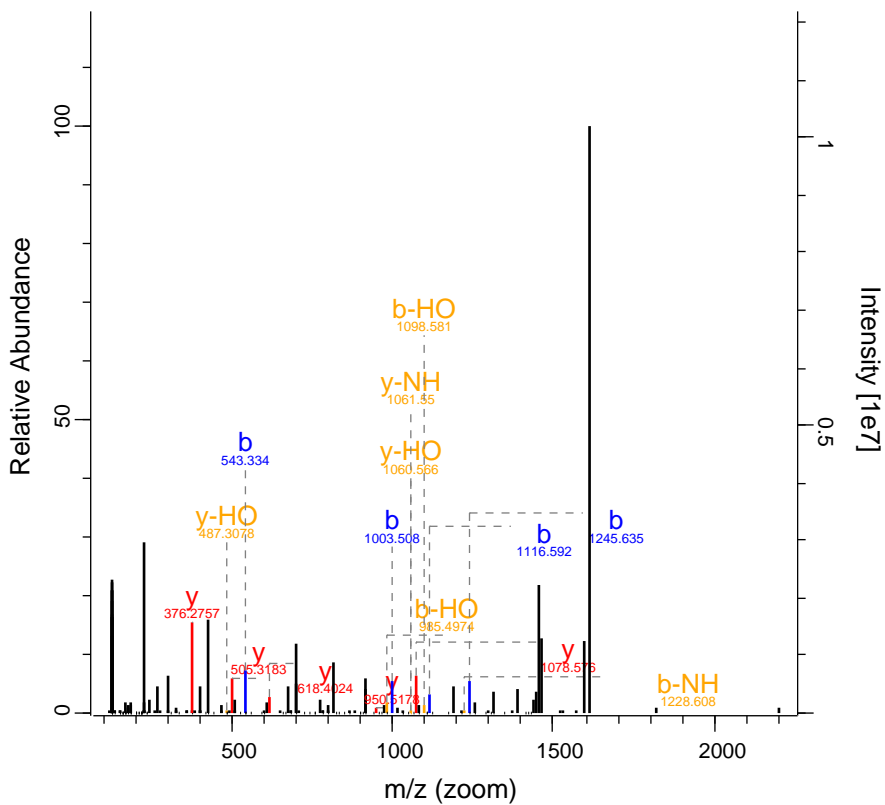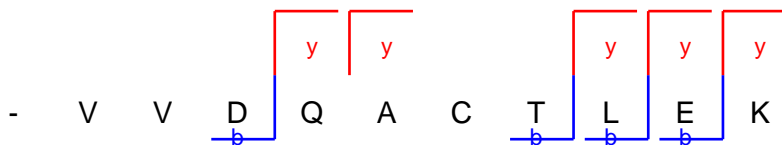

RO-QC-160121\_ZackD\_SS\_Set\_01\_Fractio 23285 FTMS; HC 104.17 650.37 TRDMT1

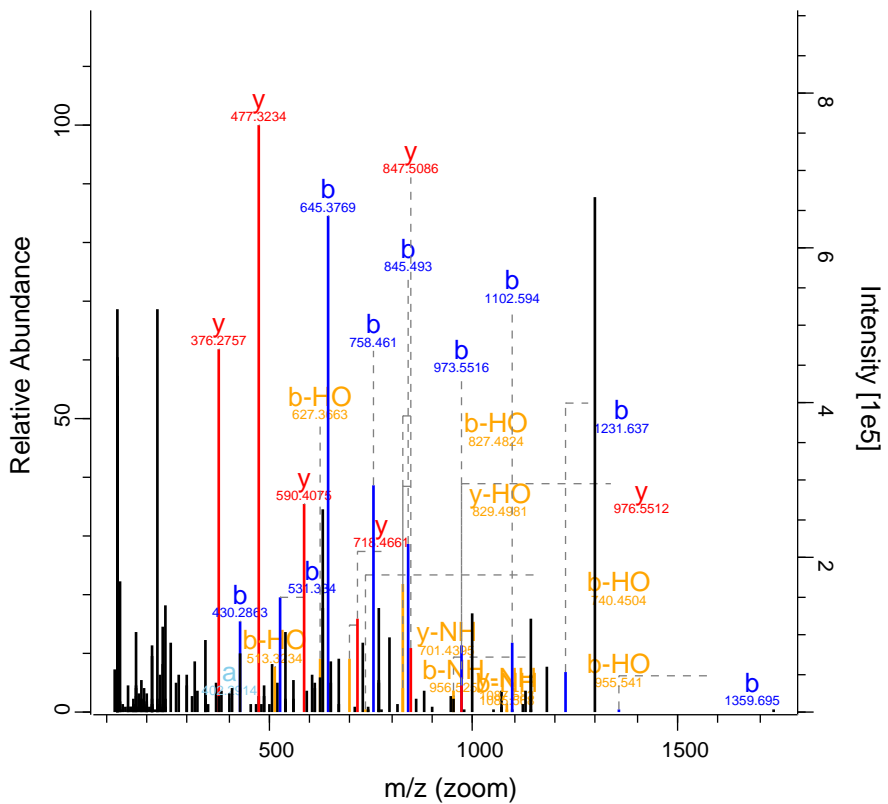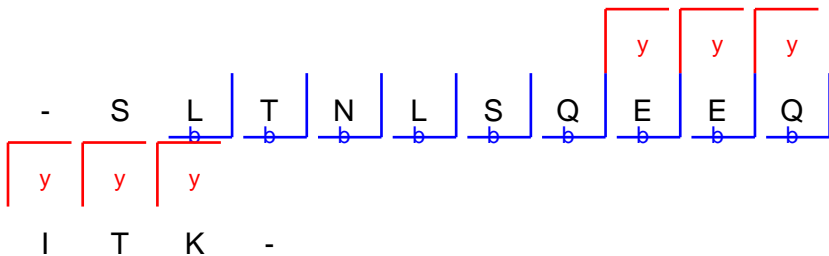

RO-QC-160121\_ZackD\_SS\_Set\_01\_Fraction 23490 FTMS; HCl 89.3 829 TRDC

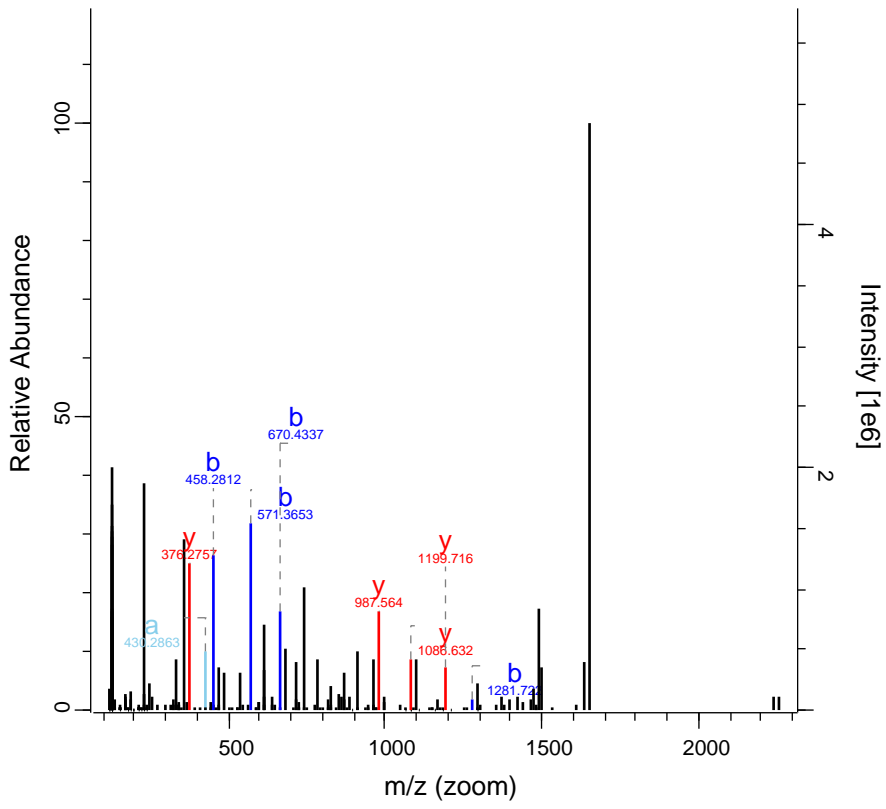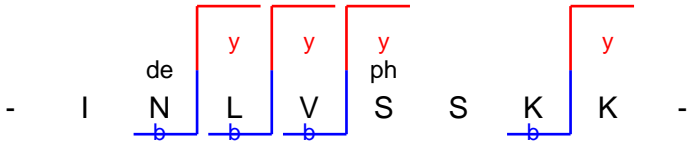

RO-QC-160121\_ZackD\_SS\_Set\_01\_Fraction 23573 FTMS; HC 88.5 873.51 PGAP2

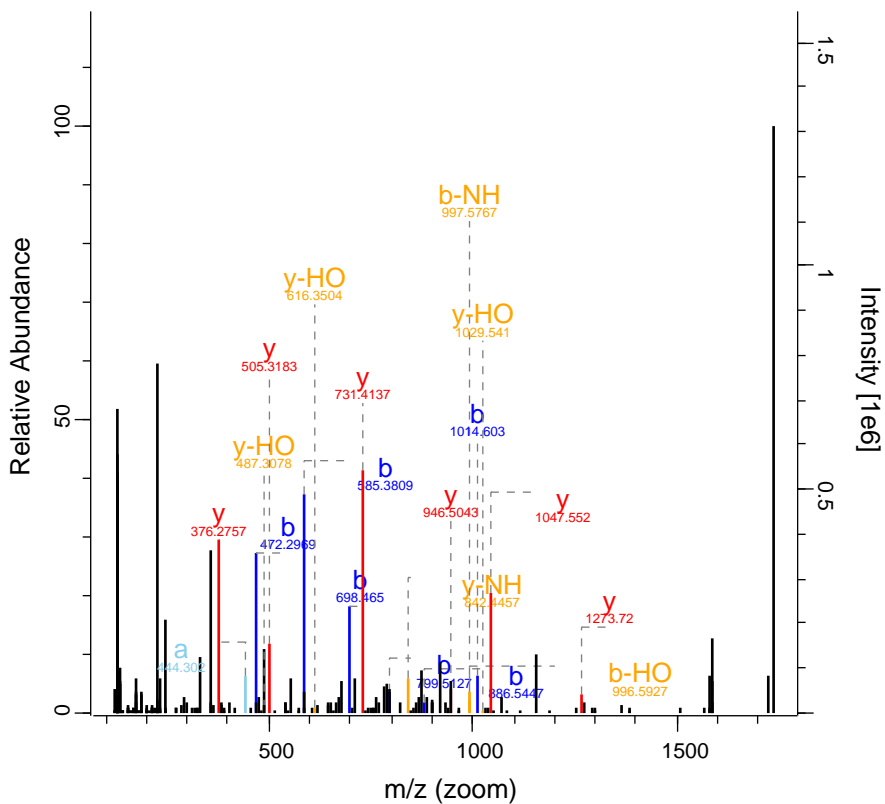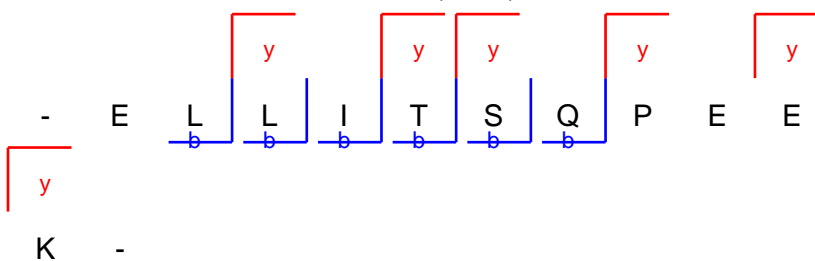

RO-QC-160121\_ZackD\_SS\_Set\_01\_Fraction 23691 FTMS; HC 98.16 552.65 FKBPL

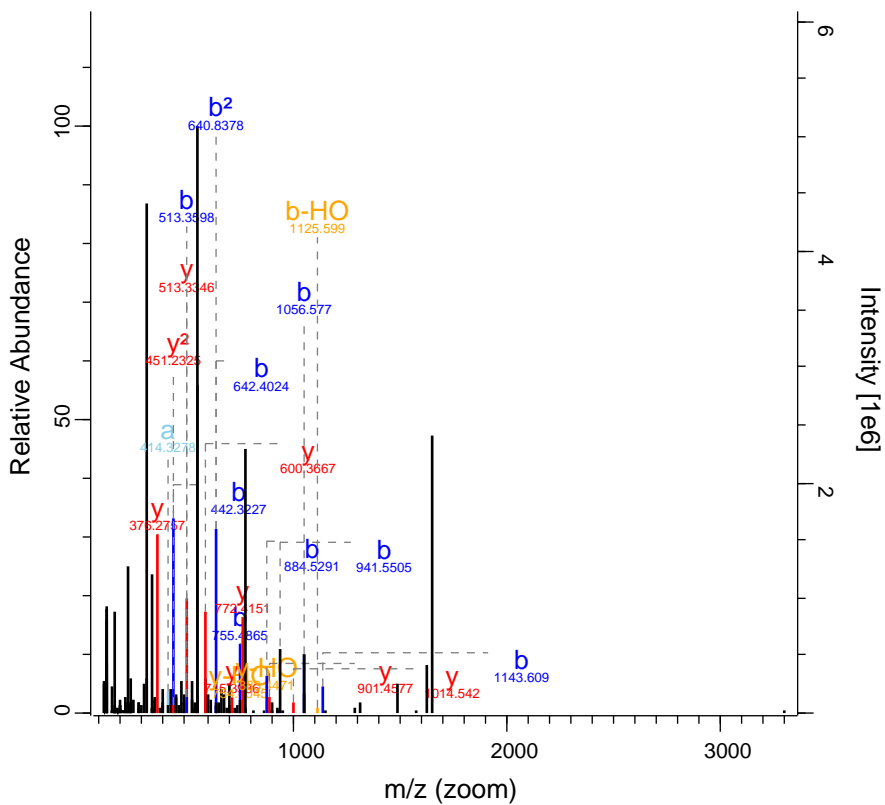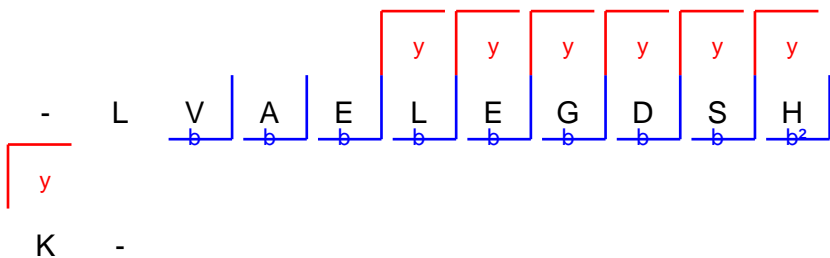

RO-QC-160121\_ZackD\_SS\_Set\_01\_Fractio 23701 FTMS; HC 115.18 582.34 PGAP2

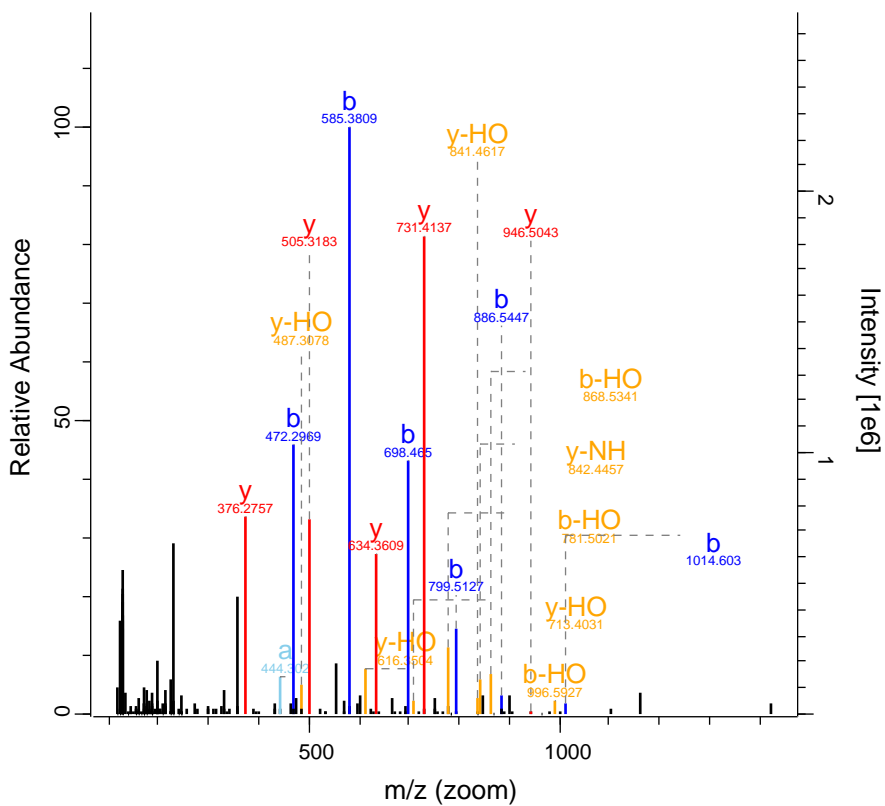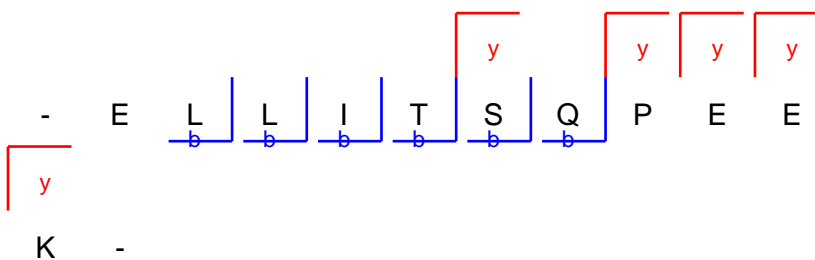

RO-QC-160121\_ZackD\_SS\_Set\_01\_Fractio 24236 FTMS; HC 100.79 514.26 APOBEC3B

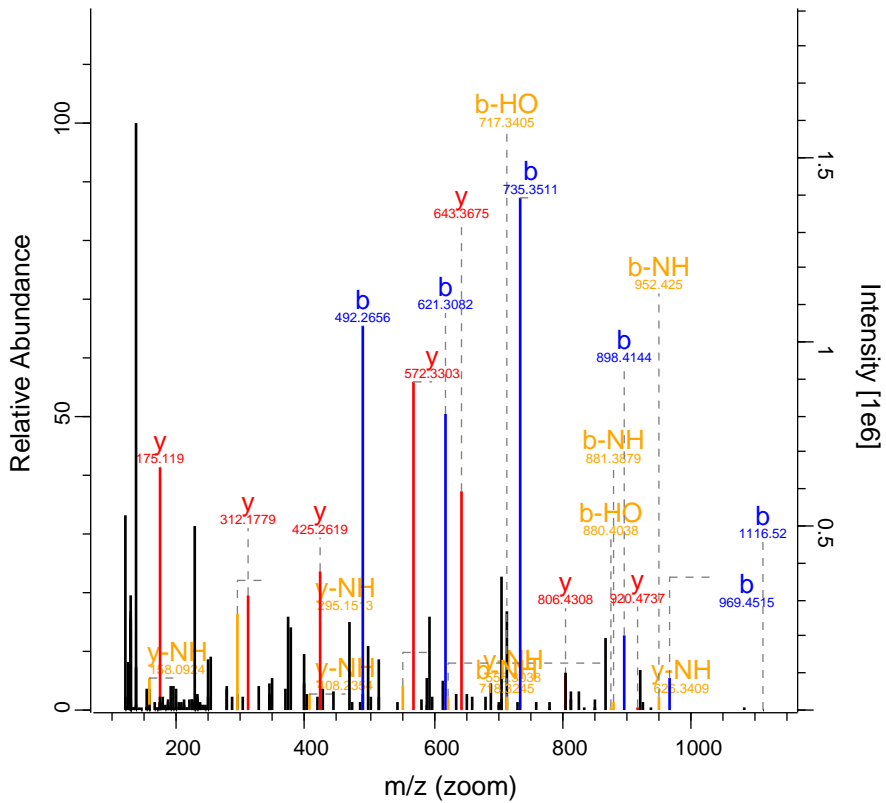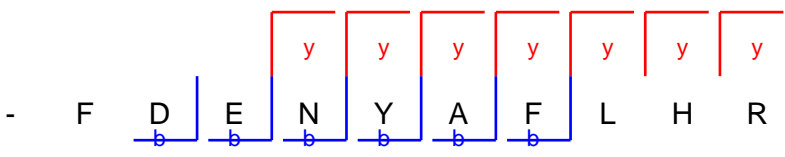



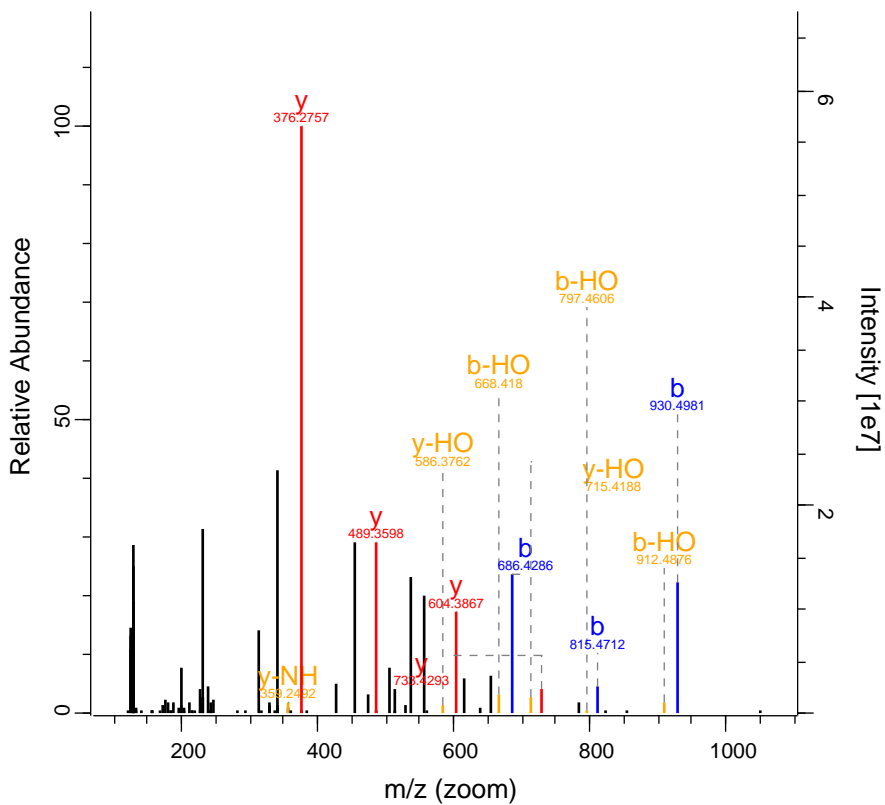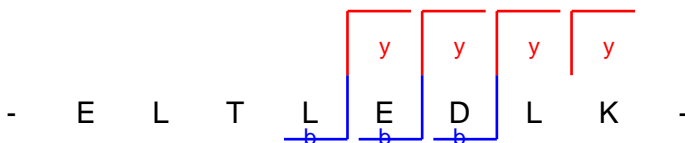

RO-QC-160121\_ZackD\_SS\_Set\_01\_Fraction 24473 FTMS; HC 42.56 739.04 TRPM6

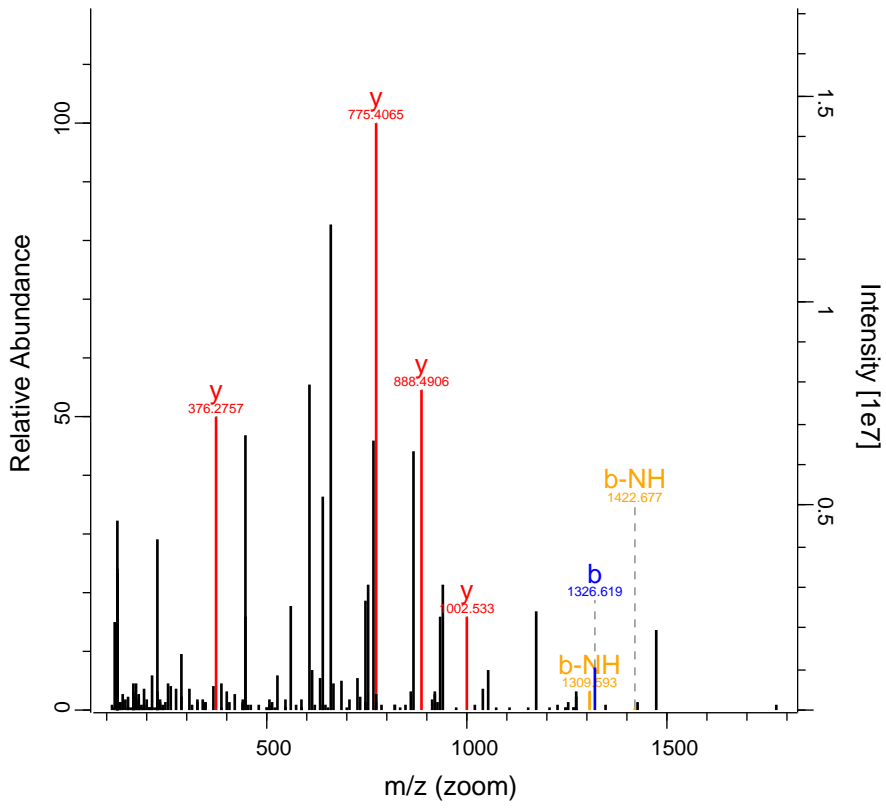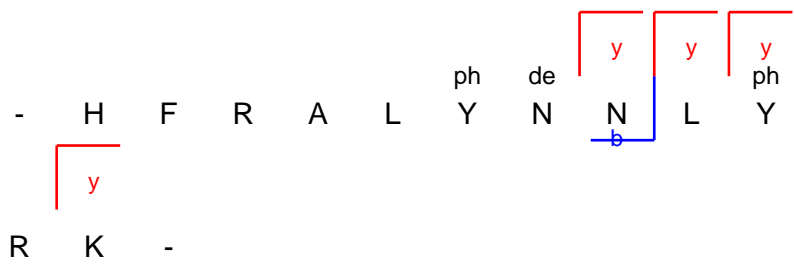

RO-QC-160121\_ZackD\_SS\_Set\_01\_Fractio 24571 FTMS; HC 141.58 915.52 PRRX1

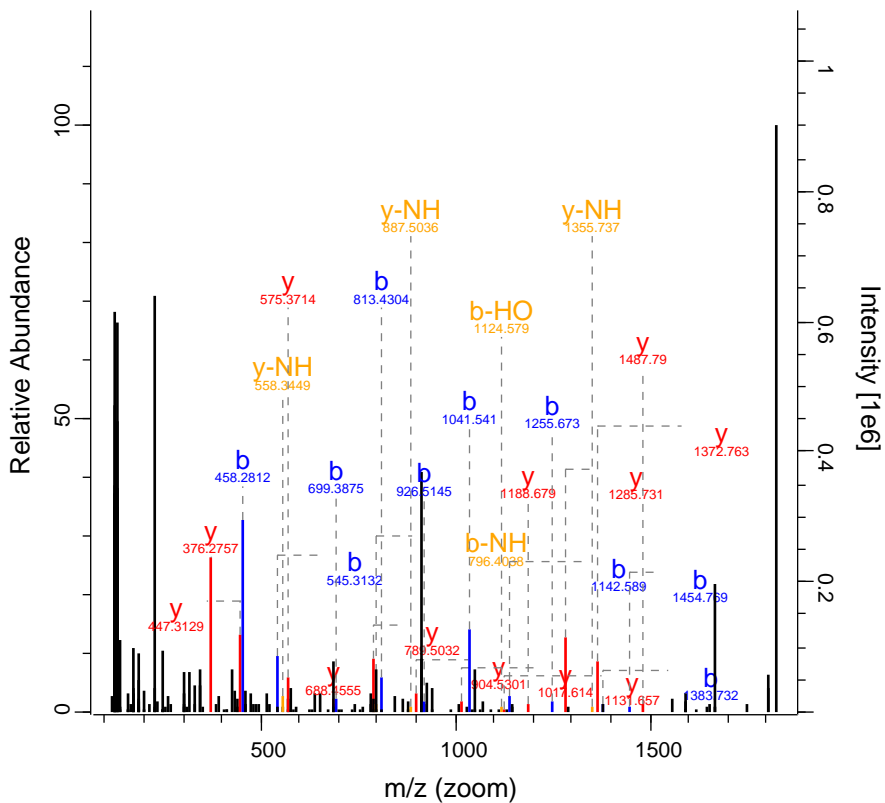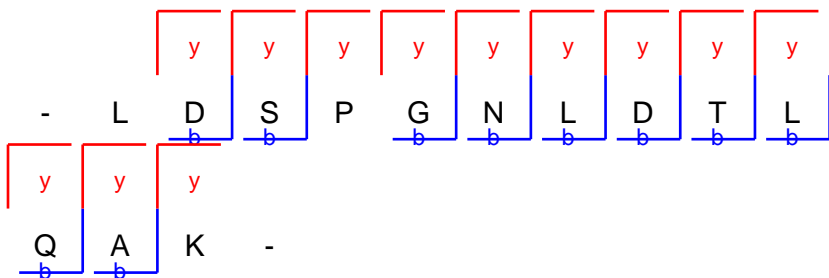

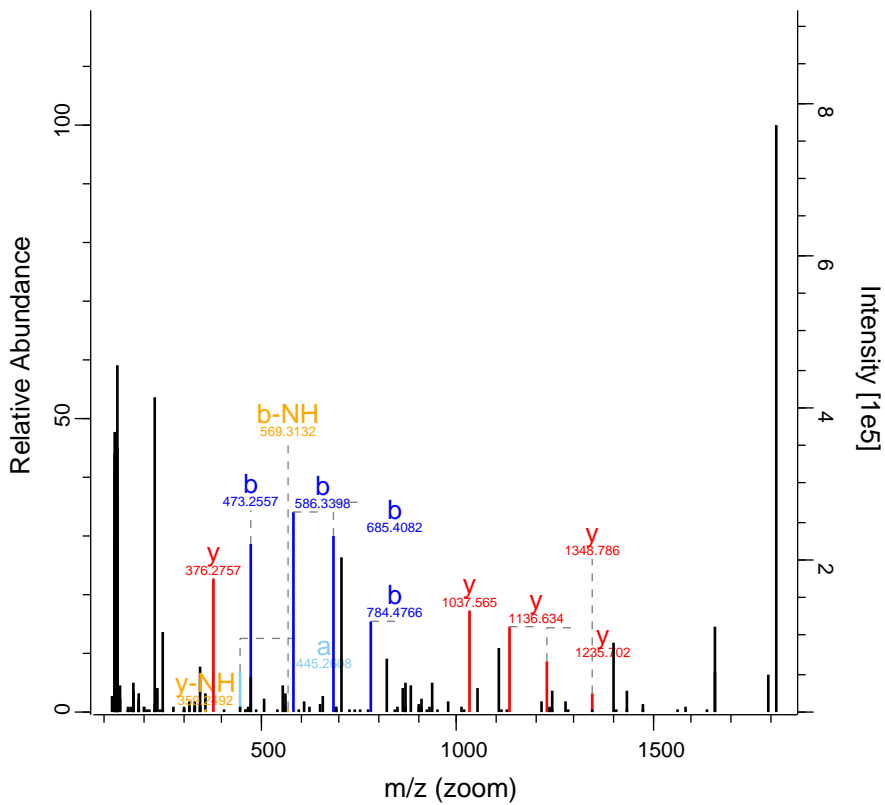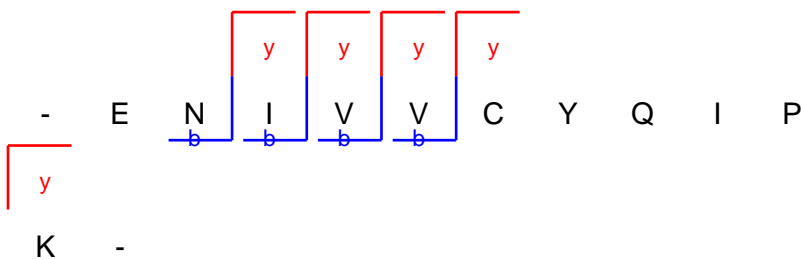



RO-QC-160121\_ZackD\_SS\_Set\_01\_Fractio 25434 FTMS; HC 141.08 831.93 GPRC5B

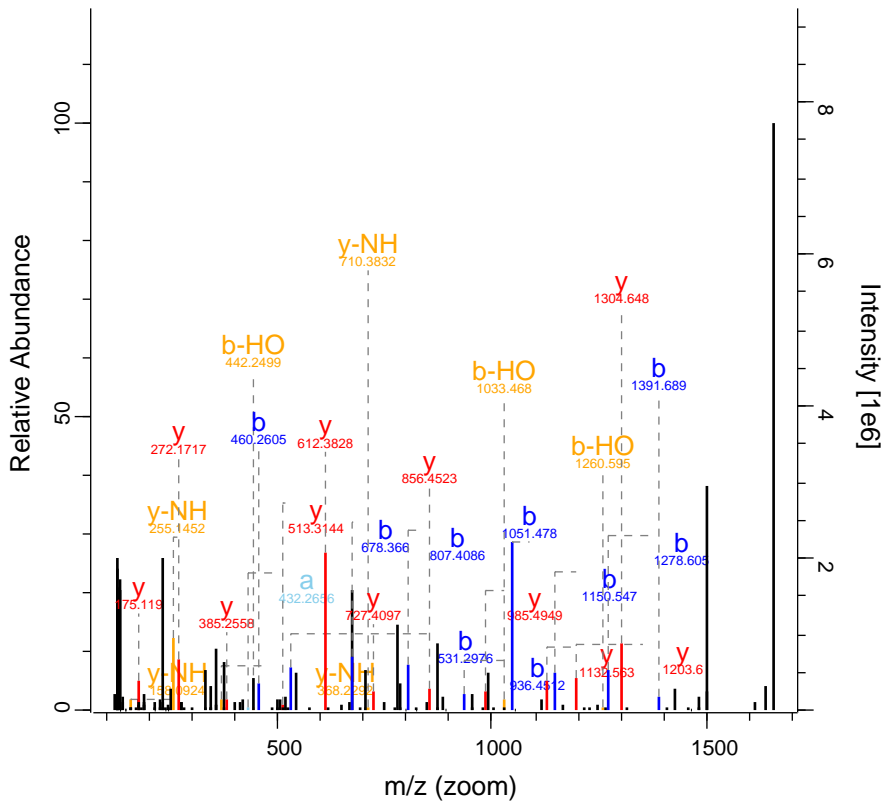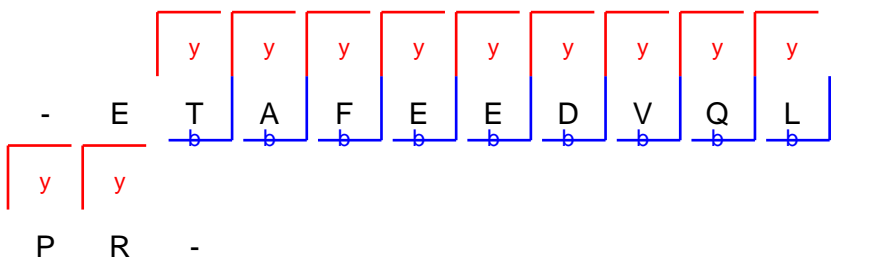

P R -

RO-QC-160121\_ZackD\_SS\_Set\_01\_Fraction 25487 FTMS; HC 66.5 554.96 GPRC5B

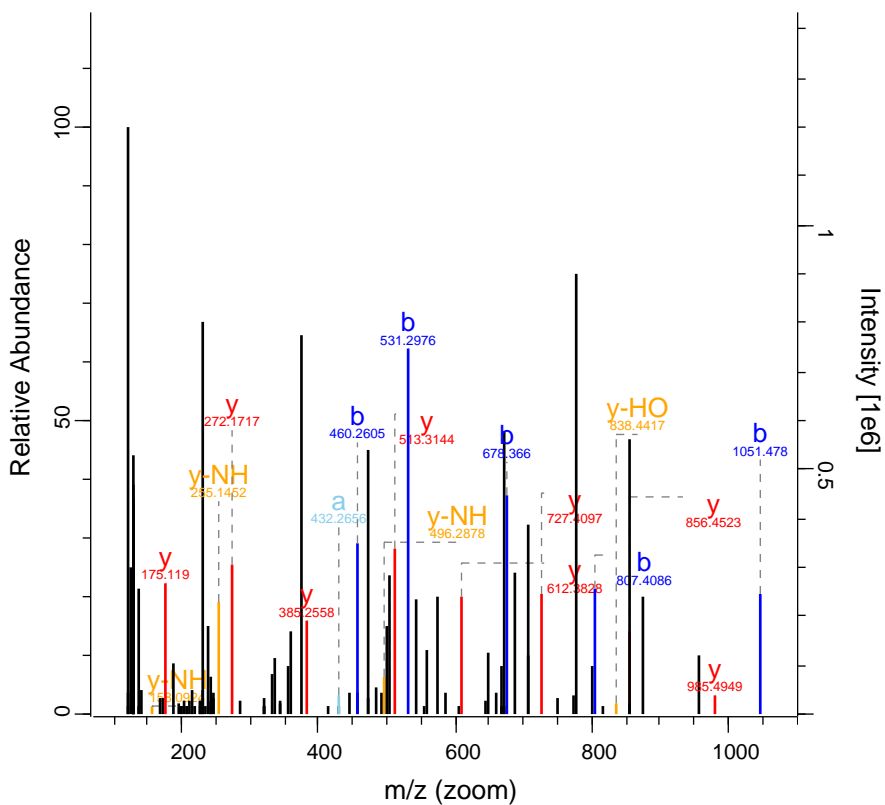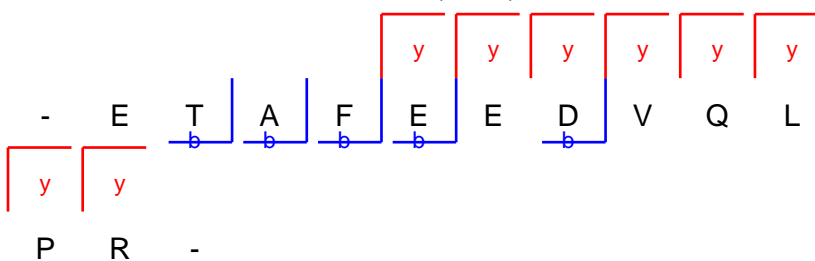

RO-QC-160121\_ZackD\_SS\_Set\_01\_Fractio 25501 FTMS; HC 104.45 854.78 SLC31A1

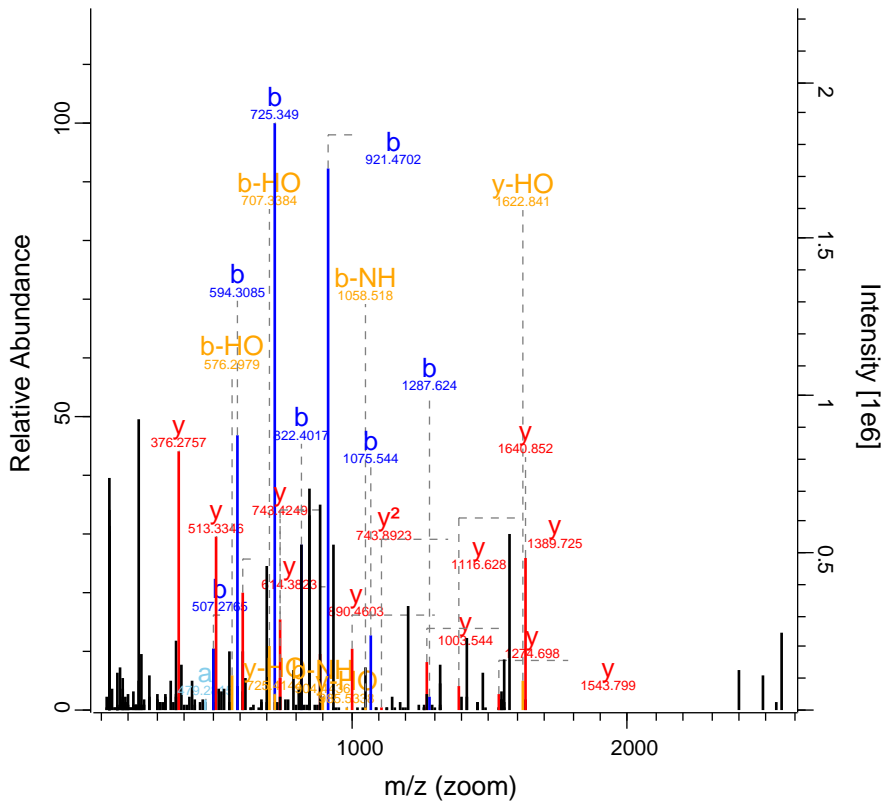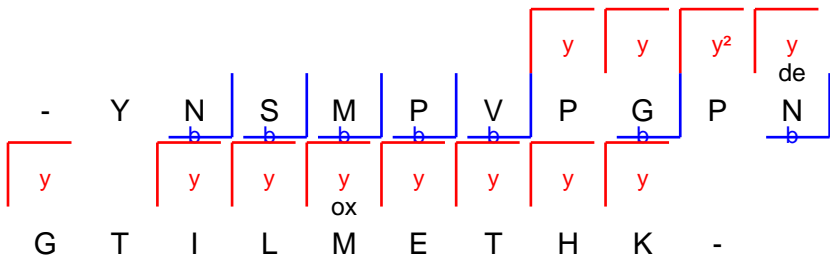



RO-QC-160121\_ZackD\_SS\_Set\_01\_Fraction 26129 FTMS; HC 93.32 465.94 PTRH1

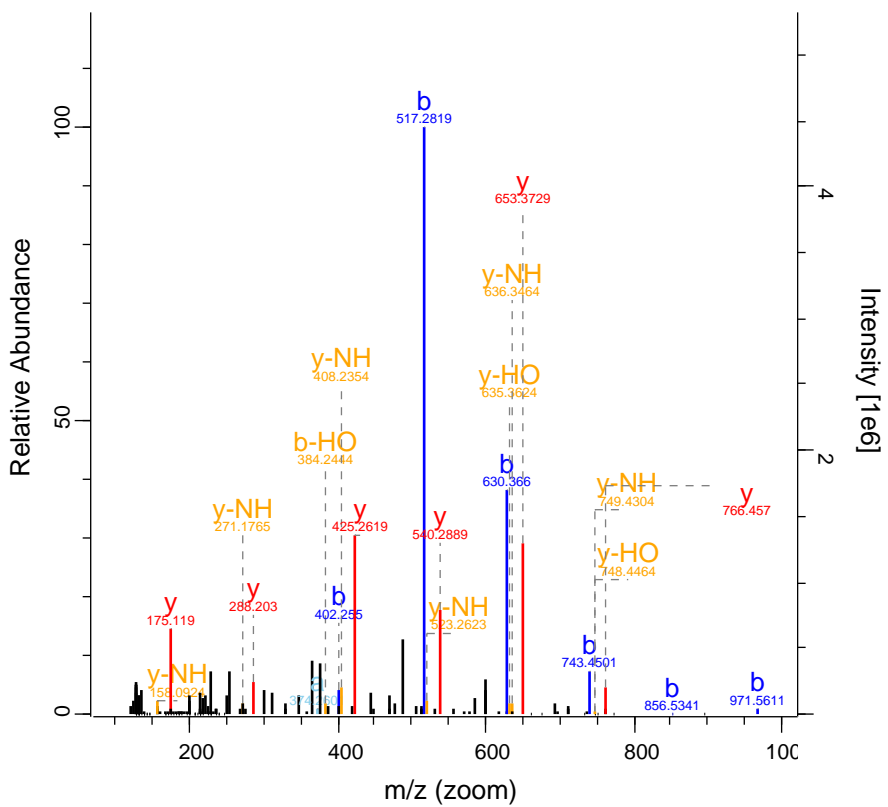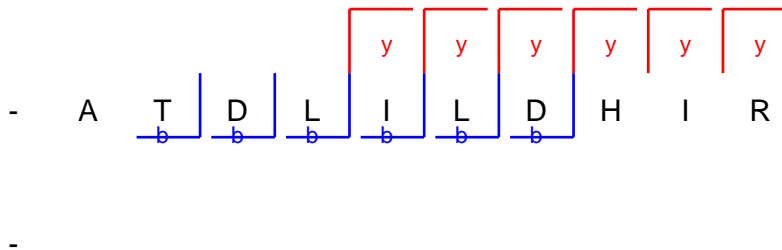



RO-QC-160121\_ZackD\_SS\_Set\_01\_Fraction 26339 FTMS; HC 89.91 465.94 PTRH1

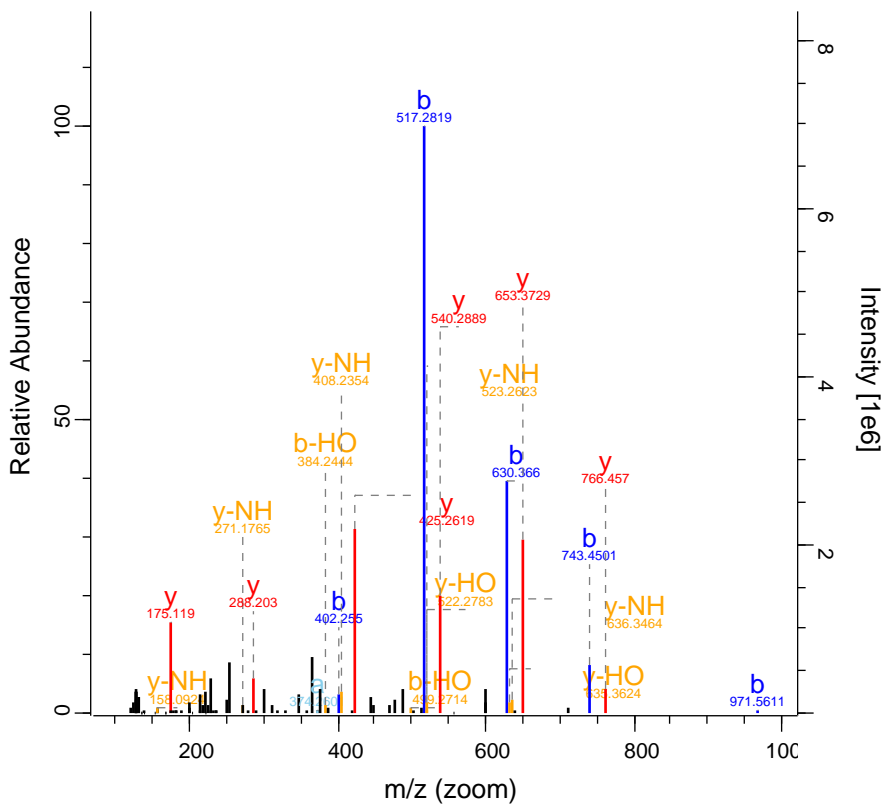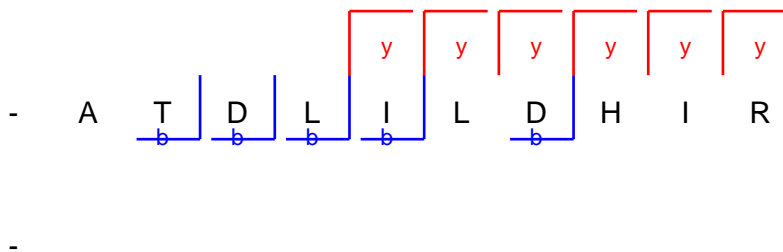

RO-QC-160121\_ZackD\_SS\_Set\_01\_Fraction 26403 FTMS; HC 46.61 1010.5 FTMT

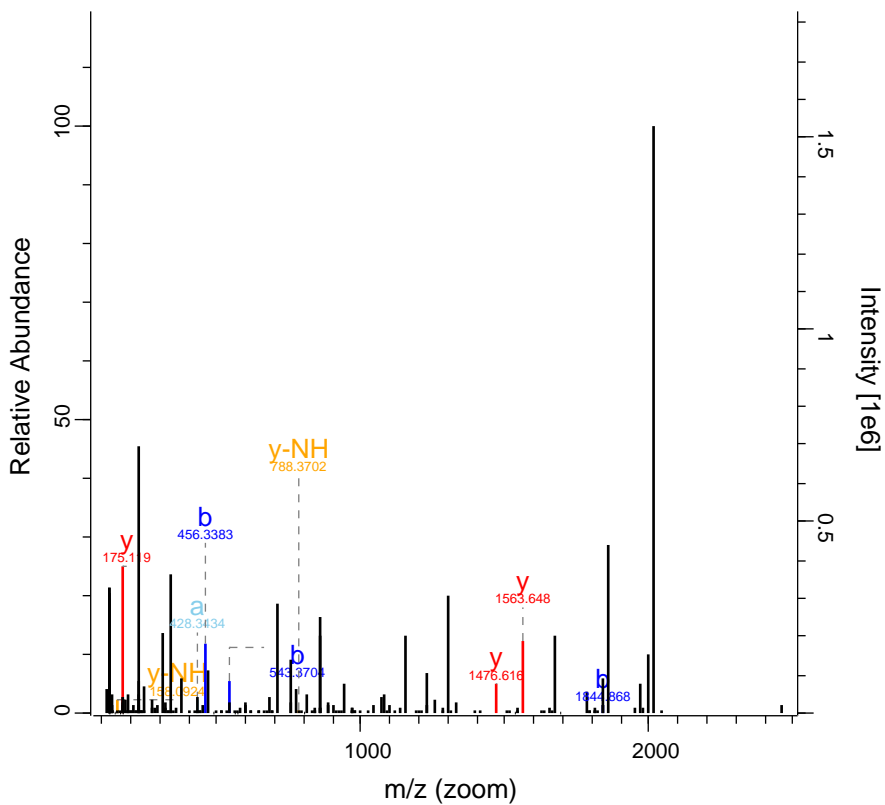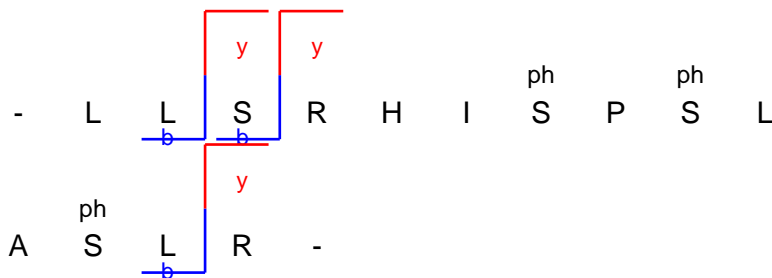

RO-QC-160121\_ZackD\_SS\_Set\_01\_Fraction 26904 FTMS; HCl 46.49 830.4 BTC

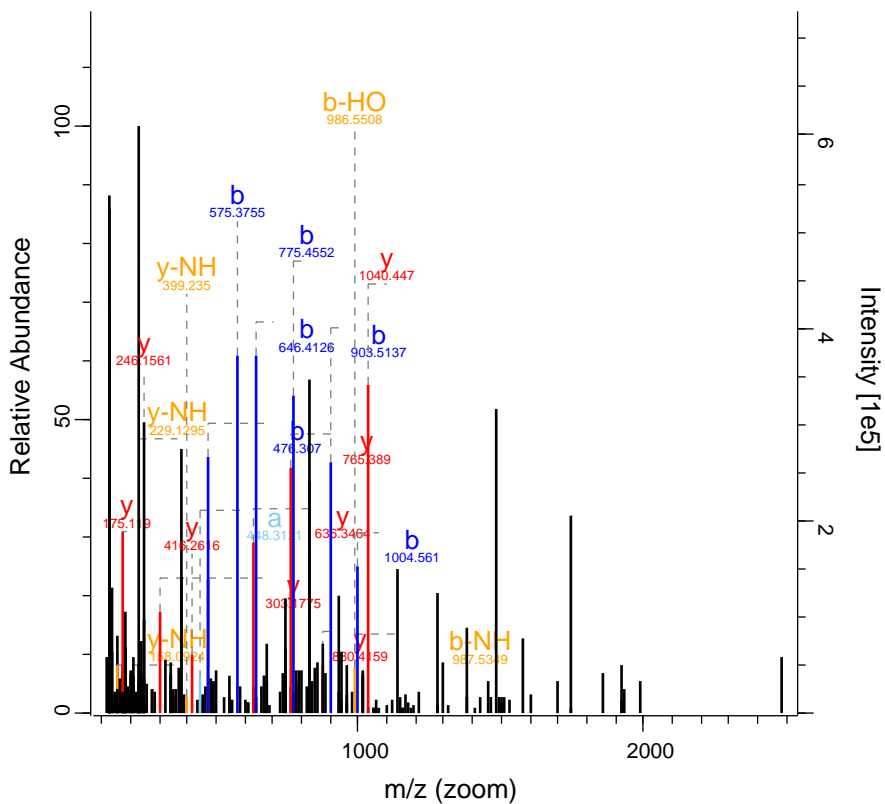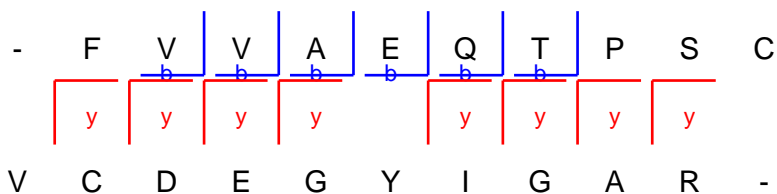



RO-QC-160121\_ZackD\_SS\_Set\_01\_Fractio 28048 FTMS; HC 110.66 563.68 IFNGR1

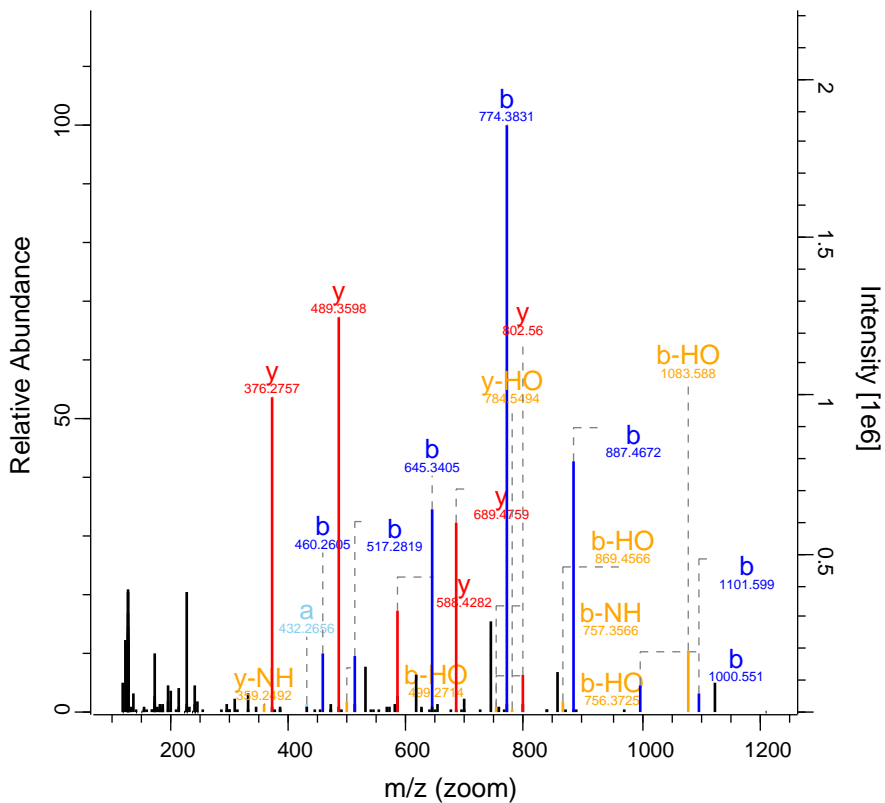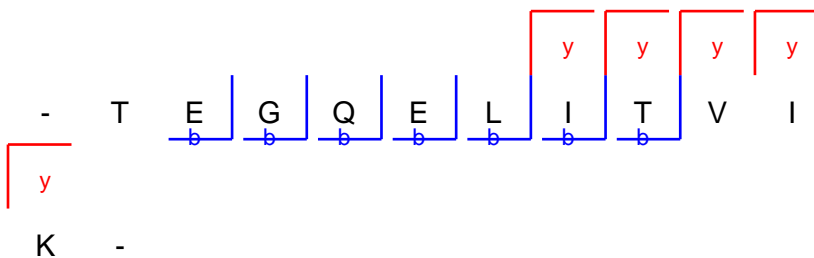

RO-QC-160121\_ZackD\_SS\_Set\_01\_Fraction 29280 FTMS; HC 94.69 771.36 EIF4EBP1

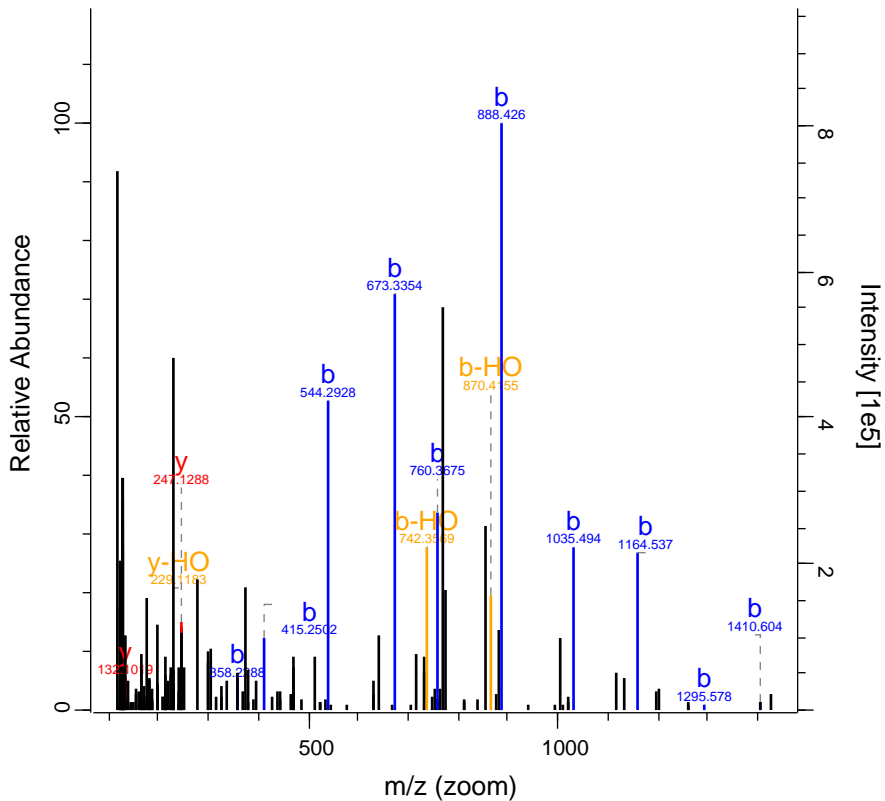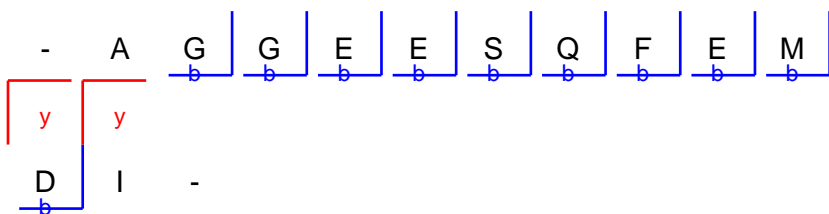



RO-QC-160121\_ZackD\_SS\_Set\_01\_Fractic 30078 FTMS; HC 89.51 1008.88 TMEM206

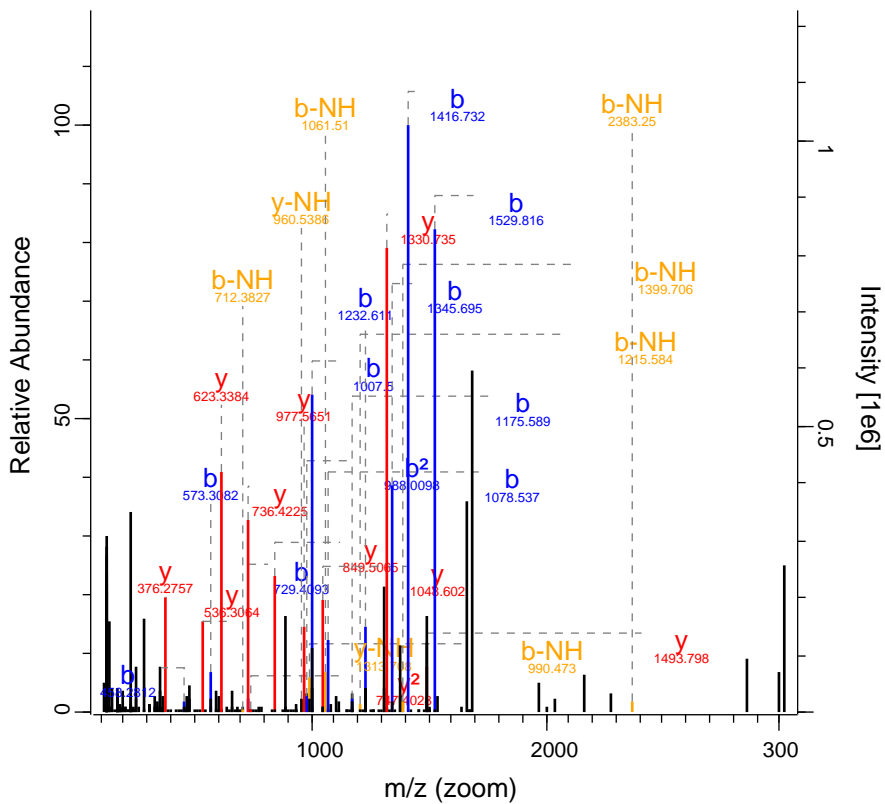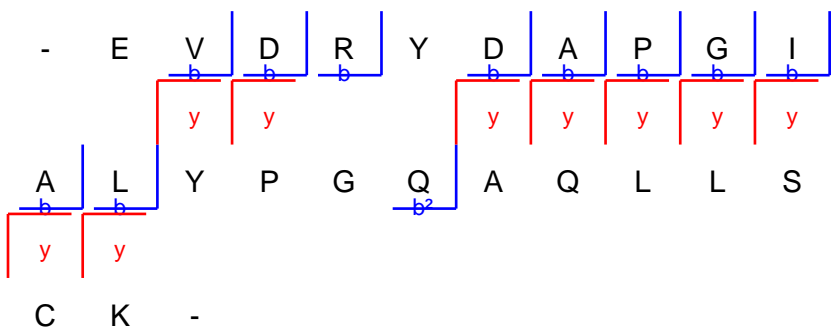

RO-QC-160121\_ZackD\_SS\_Set\_01\_Fractio 30909 FTMS; HC 100.55 628.32 TADA2B

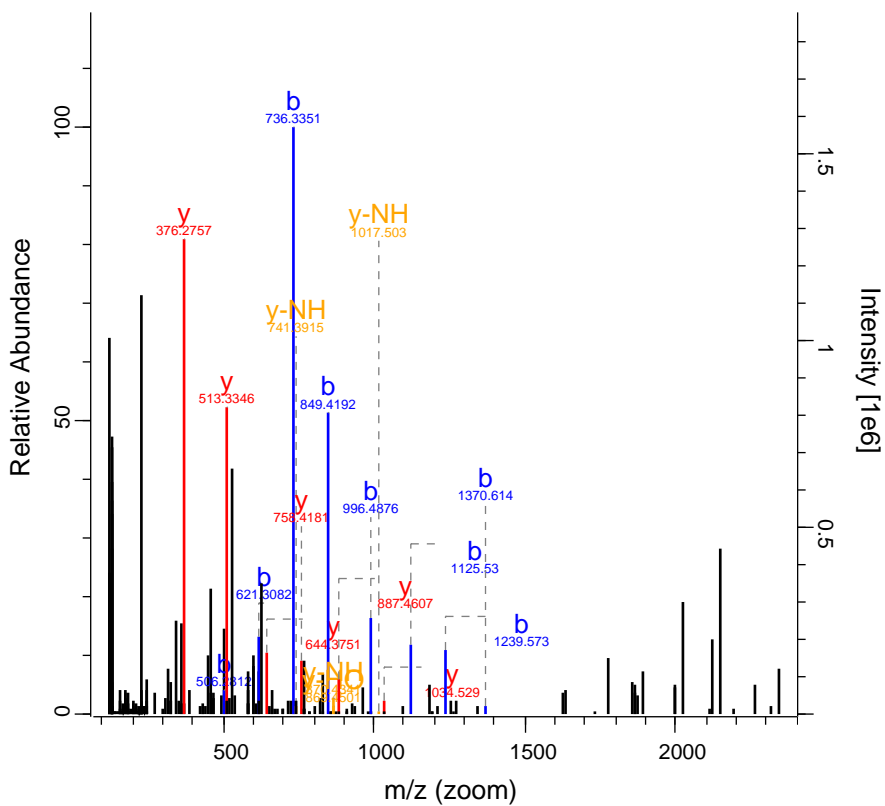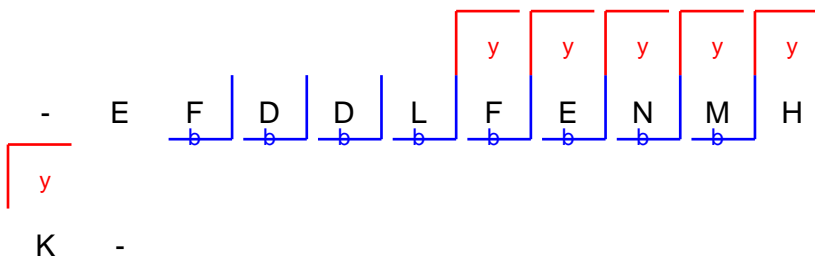

RO-QC-160121\_ZackD\_SS\_Set\_01\_Fractio 32184 FTMS; HC 123.53 995.19 NDUFAF6

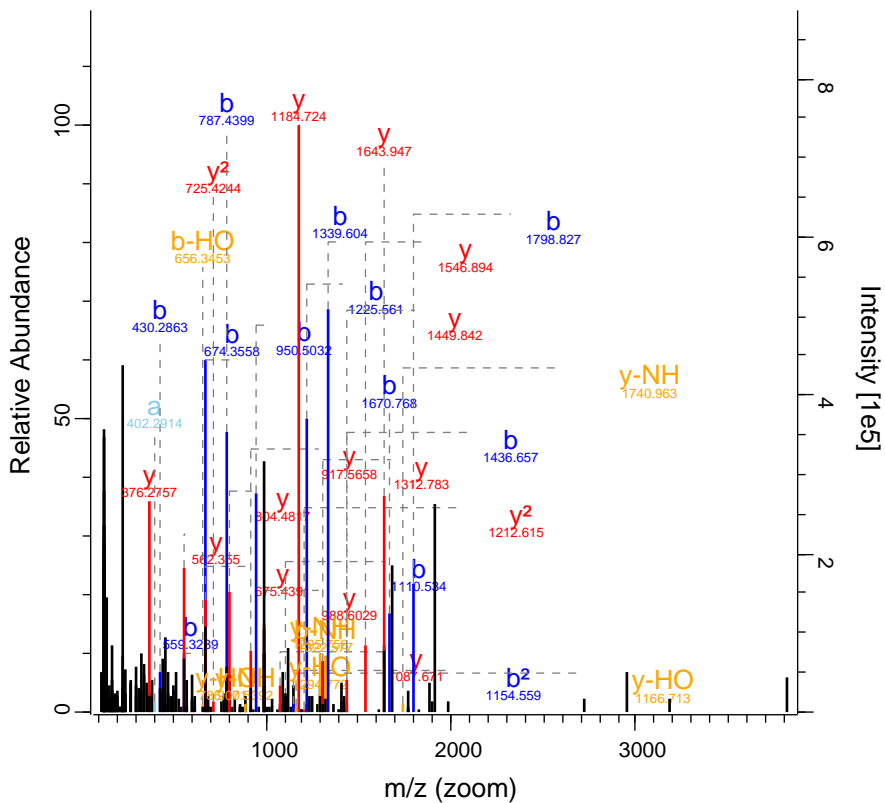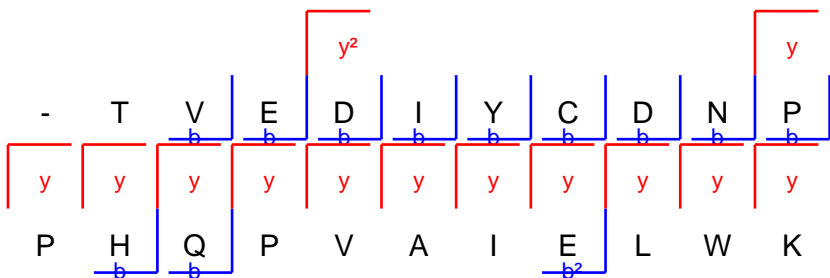

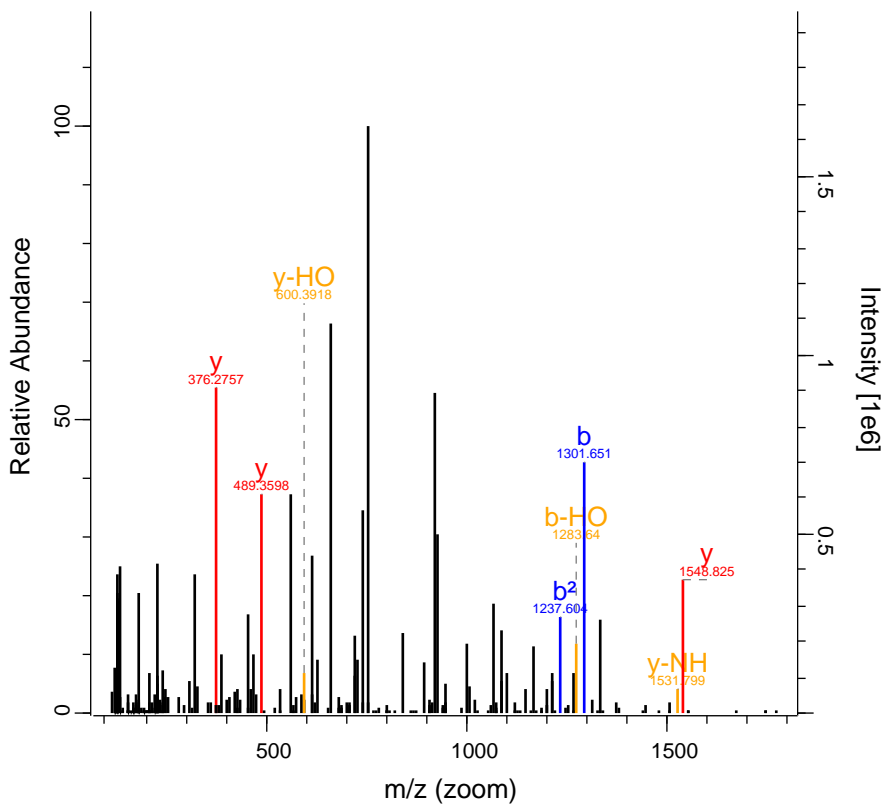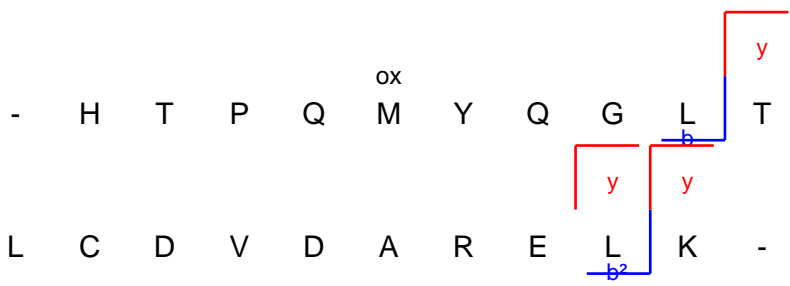

RO-QC-160121\_ZackD\_SS\_Set\_01\_Fractio 34180 FTMS; HC 121.21 555.97 IRAK1

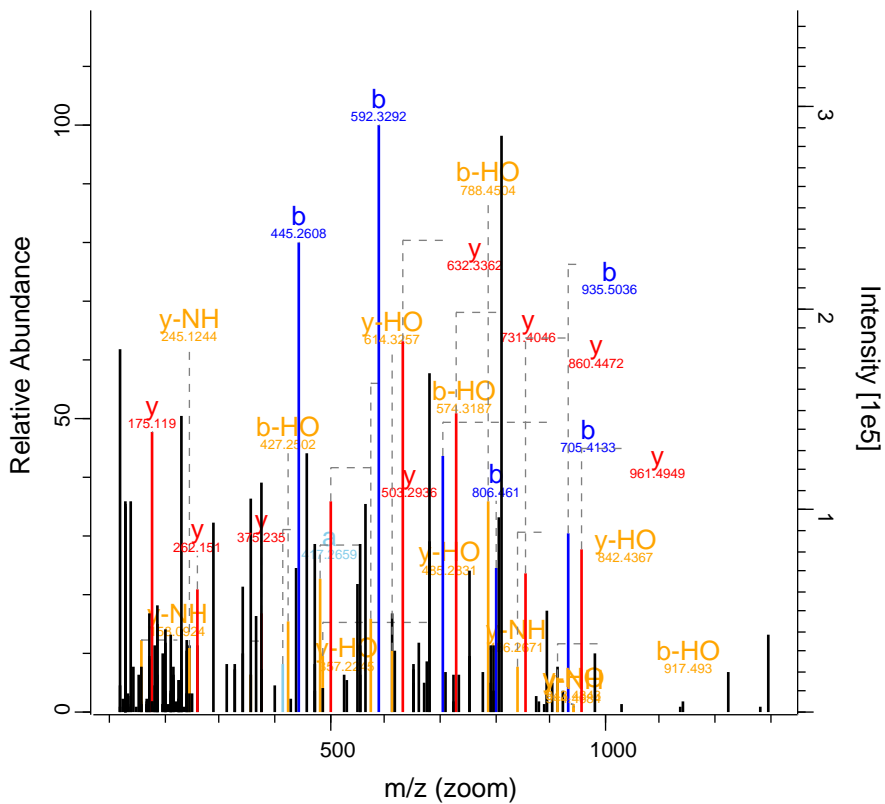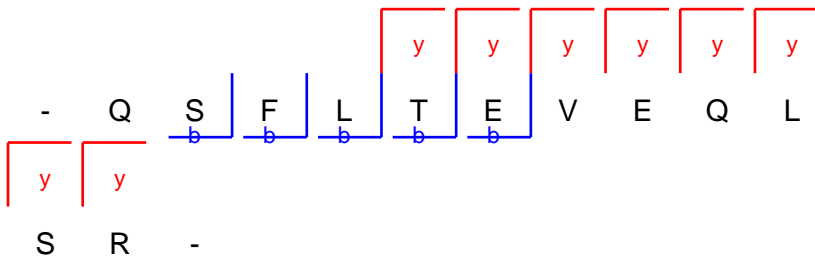

RO-QC-160121\_ZackD\_SS\_Set\_01\_Fraction 34190 FTMS; HC 40.04 822.47 OR10G3

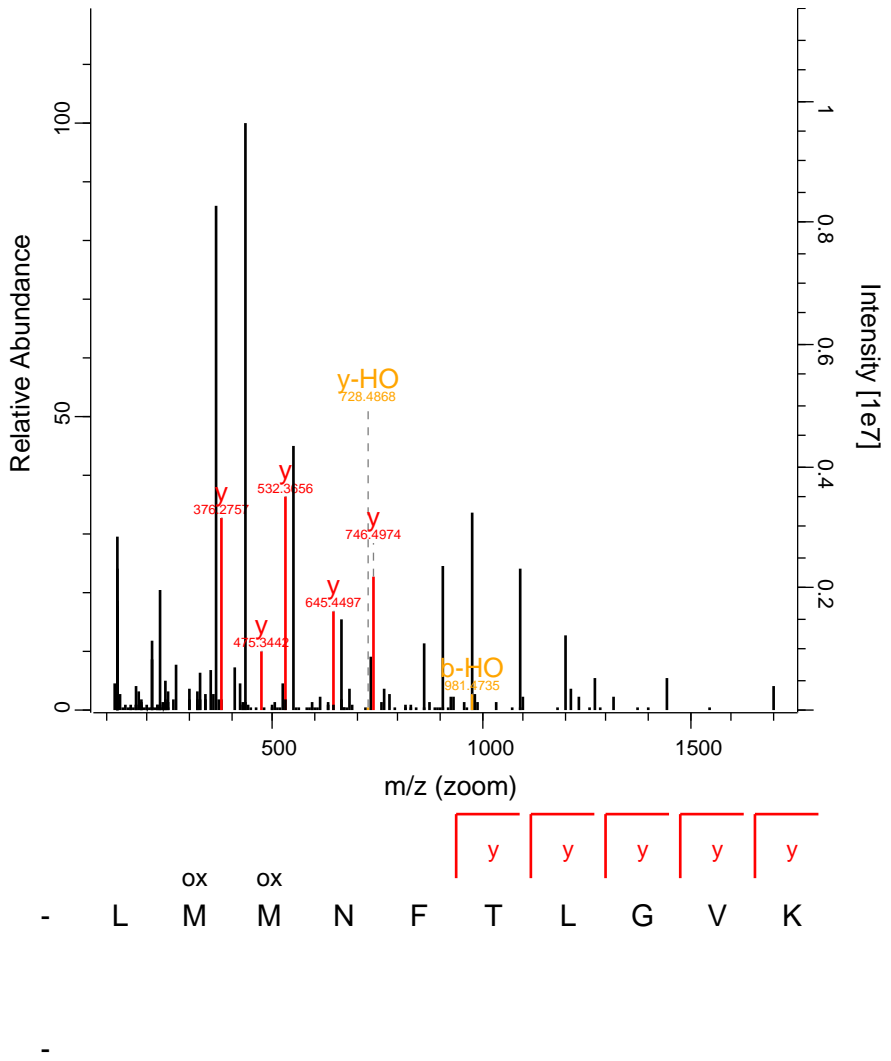

RO-QC-160121\_ZackD\_SS\_Set\_01\_Fractic 34840 FTMS; HC 216.44 1032.51 CHCHD10

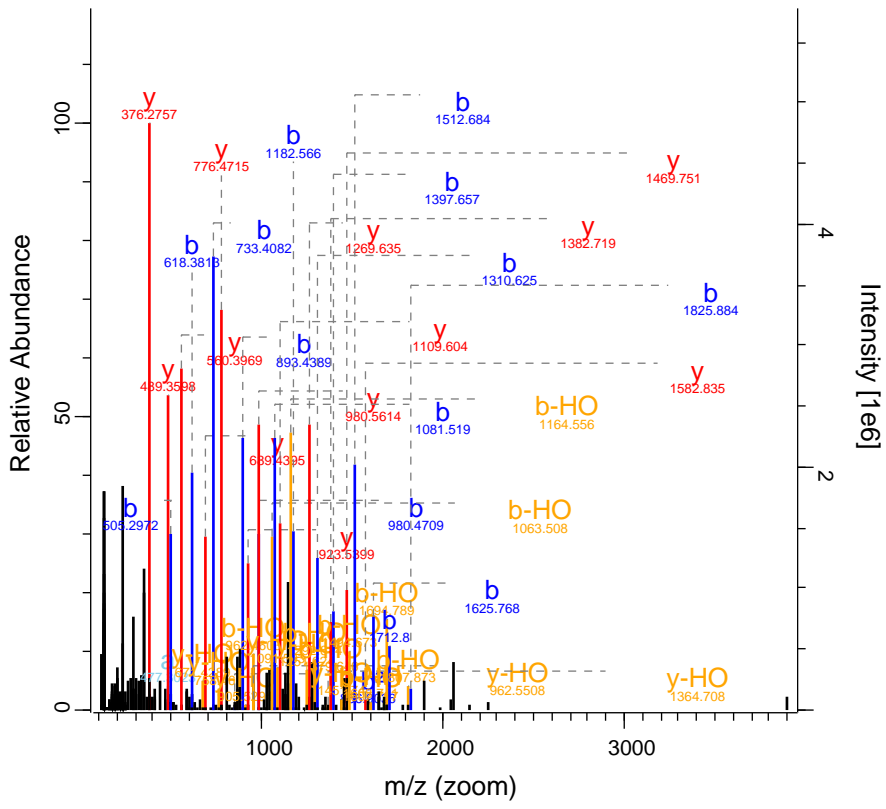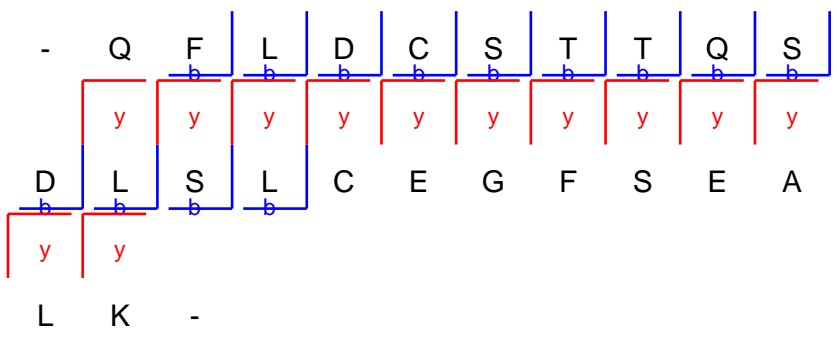

RO-QC-160121\_ZackD\_SS\_Set\_01\_Fractio 35383 FTMS; HC 114.56 605.68 MRGBP

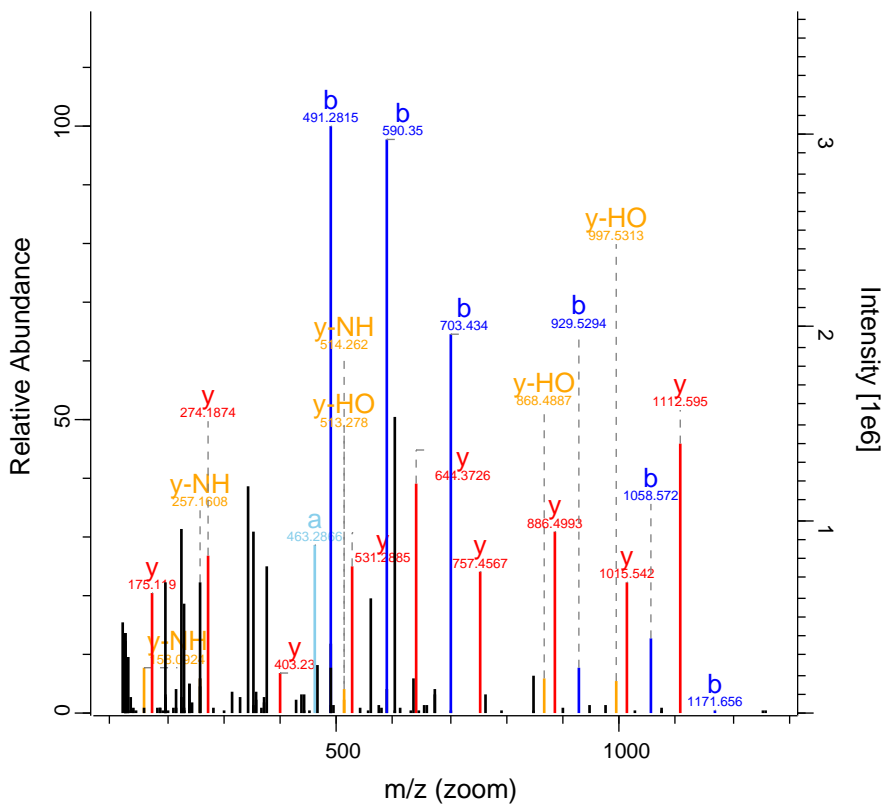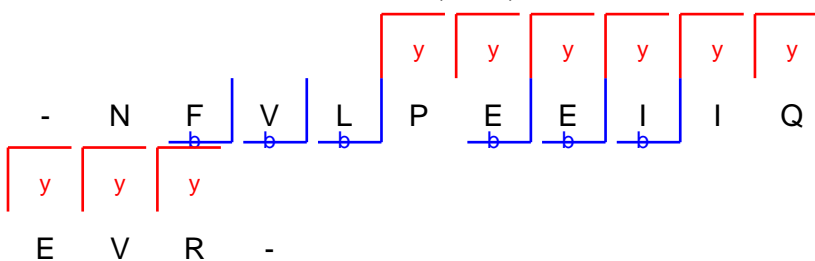



RO-QC-160121\_ZackD\_SS\_Set\_01\_Fractic 36026 FTMS; HC 71.02 1001.96 C5orf45

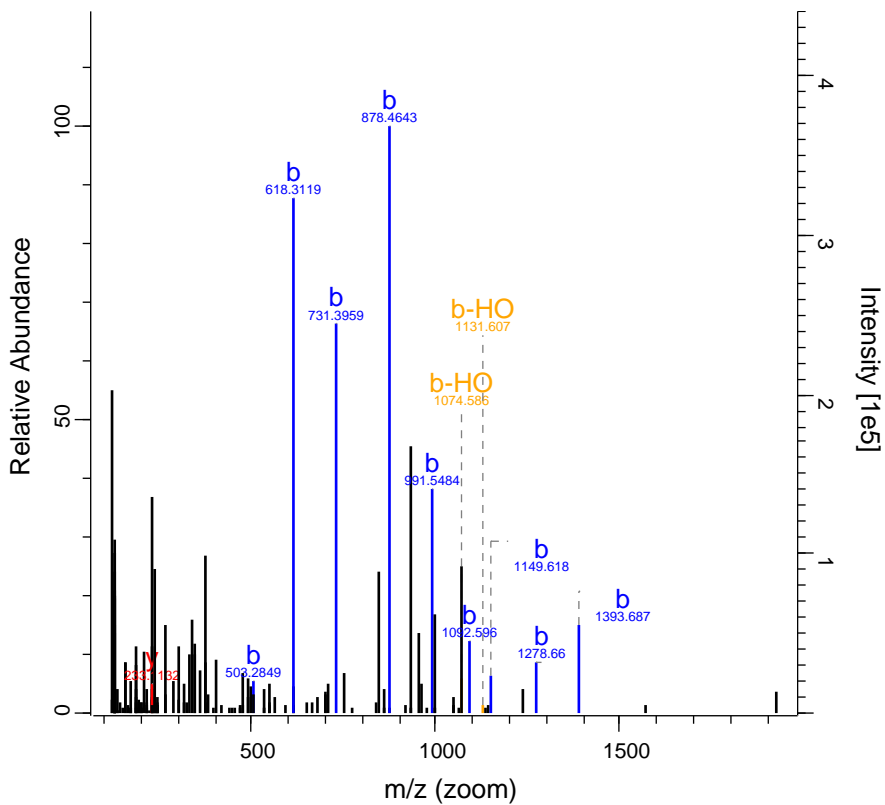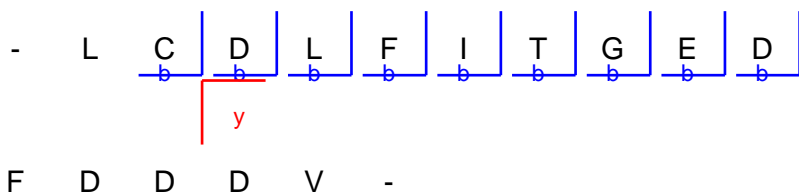

RO-QC-160121\_ZackD\_SS\_Set\_01\_Fraction 36148 FTMS; HC 149 787.78 FUNDC1

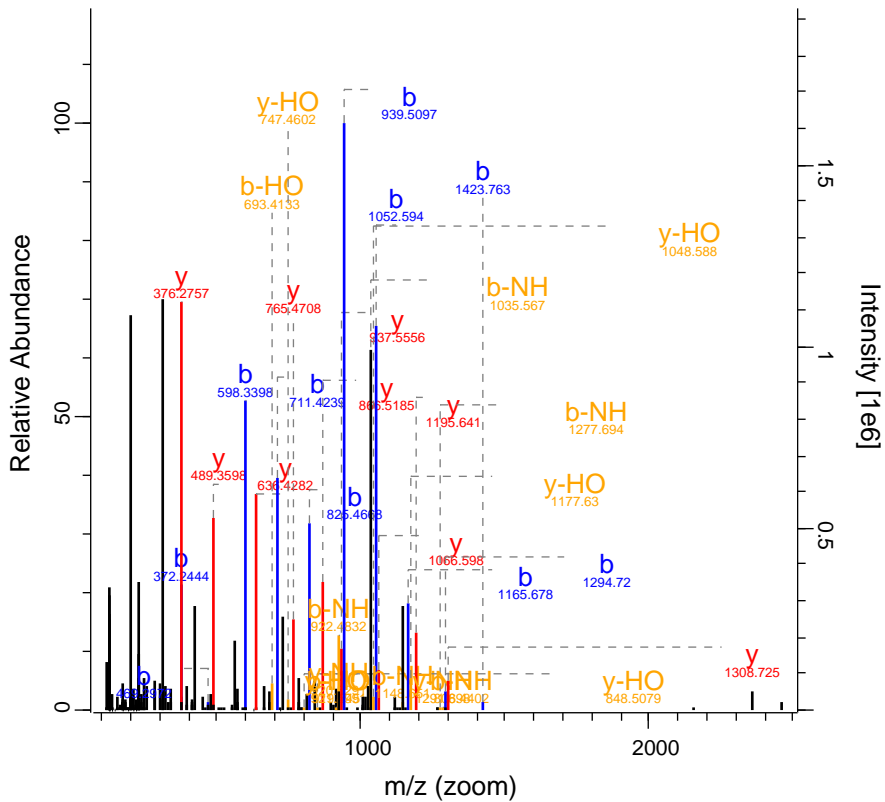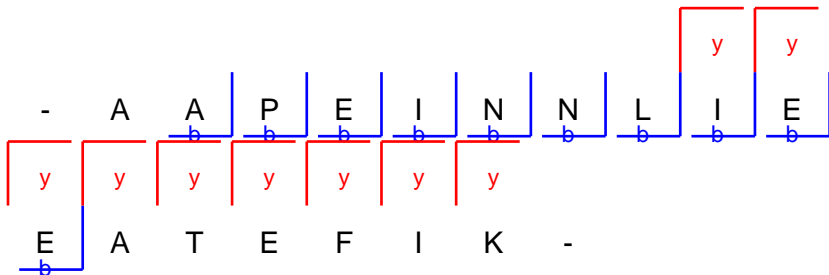

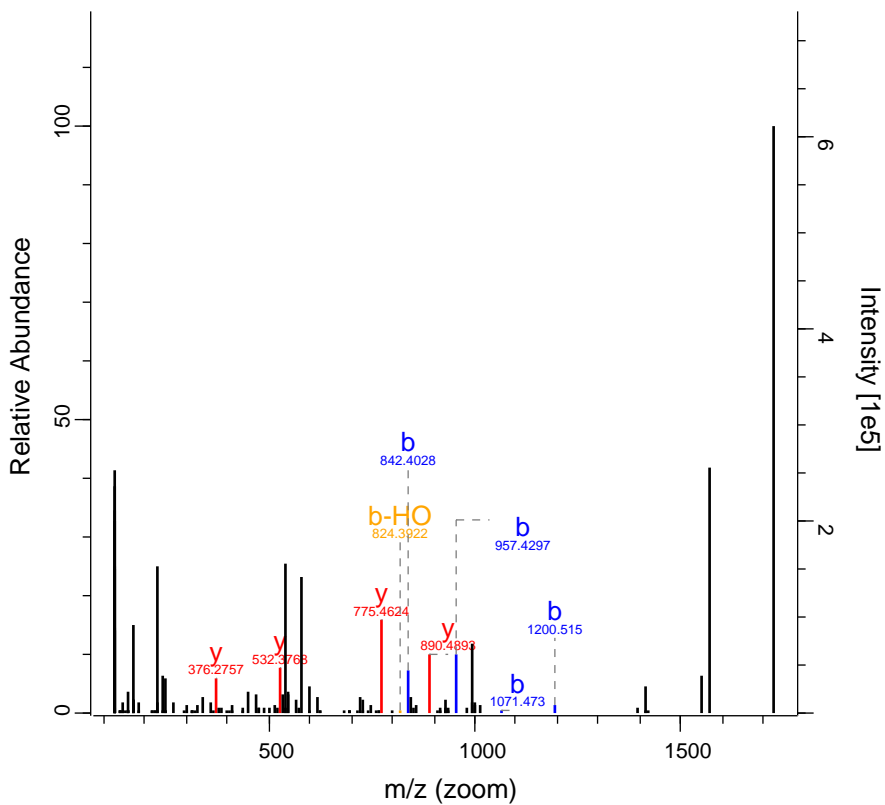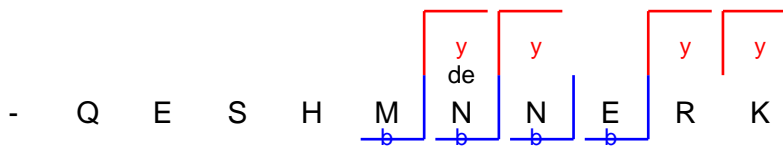

RO-QC-160121\_ZackD\_SS\_Set\_01\_Fraction1572 FTMS; HC 107.01 566.79 NXNL1

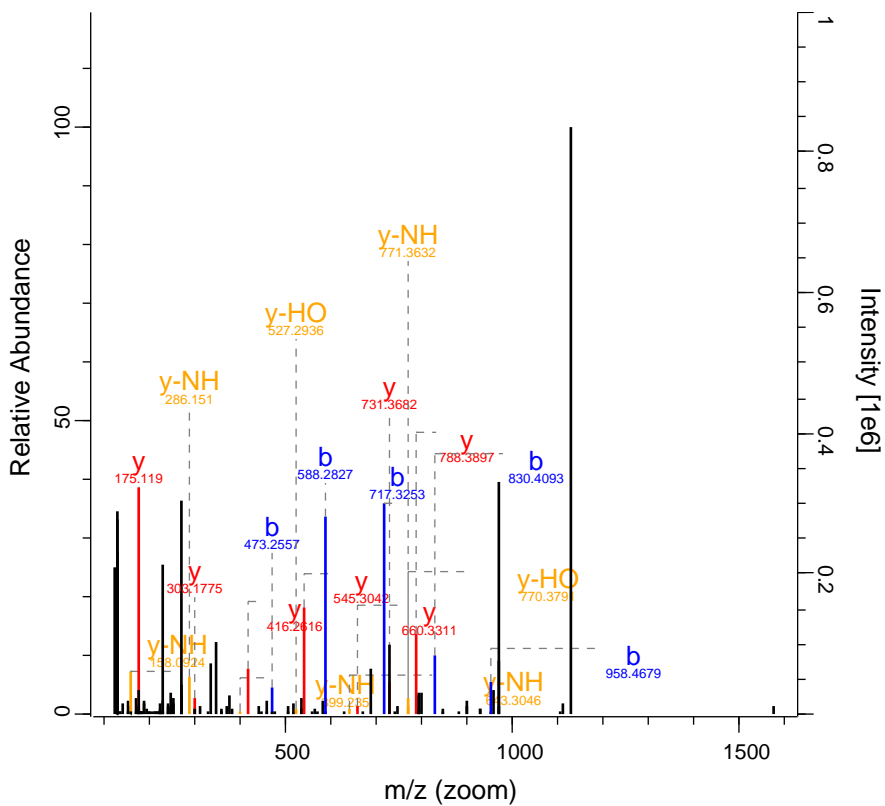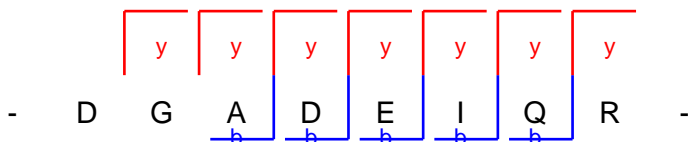

RO-QC-160121\_ZackD\_SS\_Set\_01\_Fraction 6072 FTMS; HCl62.3 586.99 FAM111B

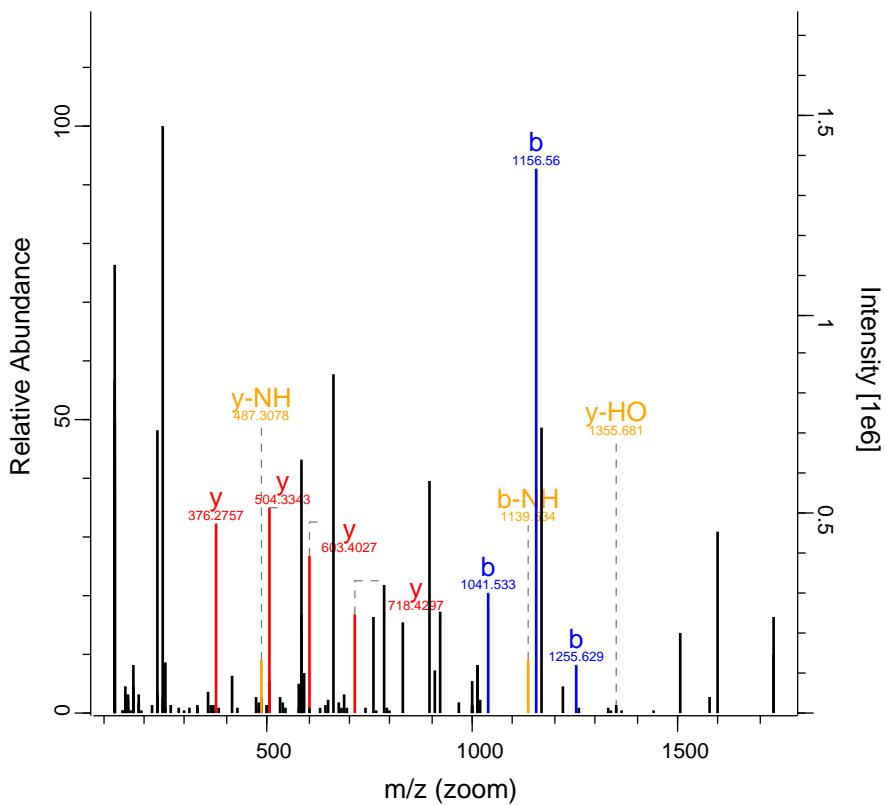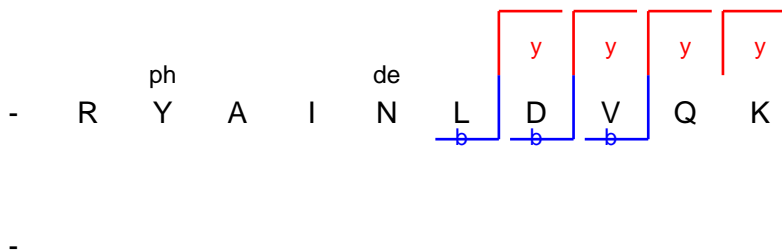

RO-QC-160121\_ZackD\_SS\_Set\_01\_Fraction 6150 FTMS; HCl 41.03 476.94 POLR2F

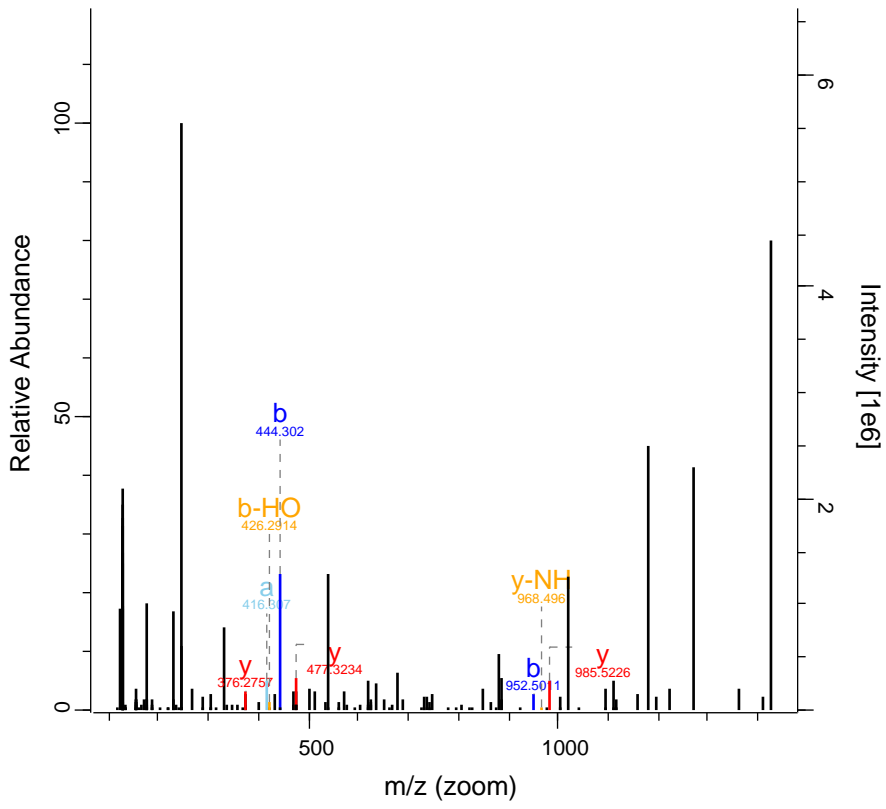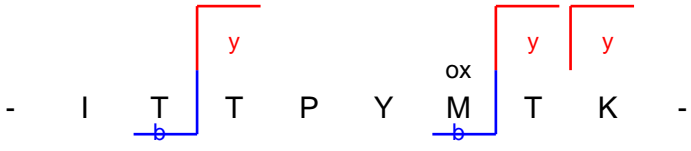

RO-QC-160121\_ZackD\_SS\_Set\_01\_Fraction 6275 FTMS; HCl 79.66 438.23 ZNF581

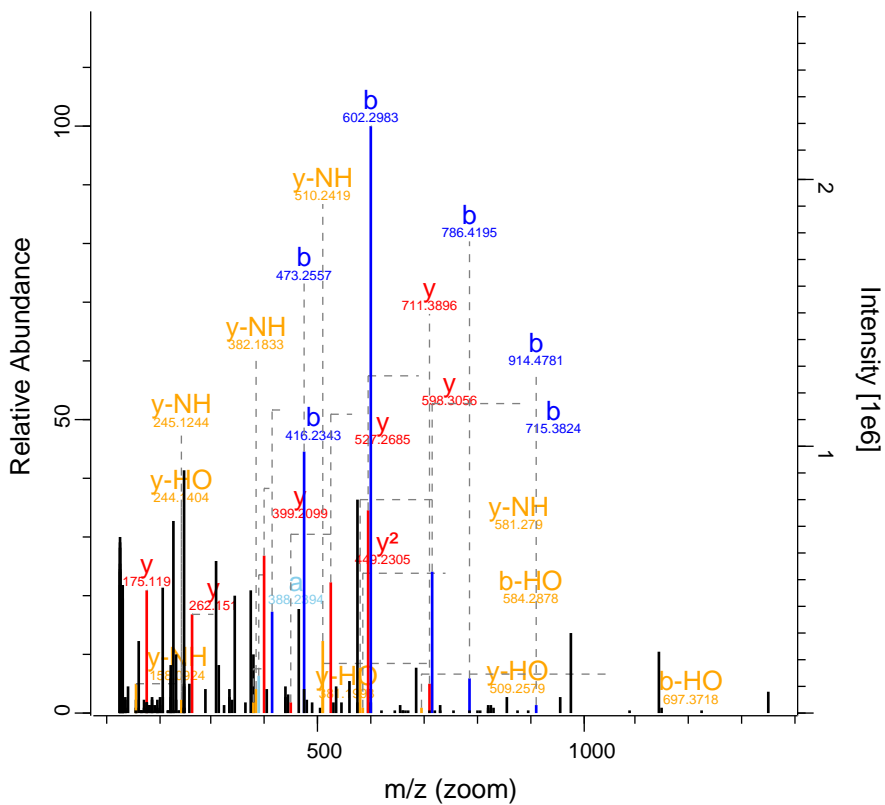

m/z (zoom)

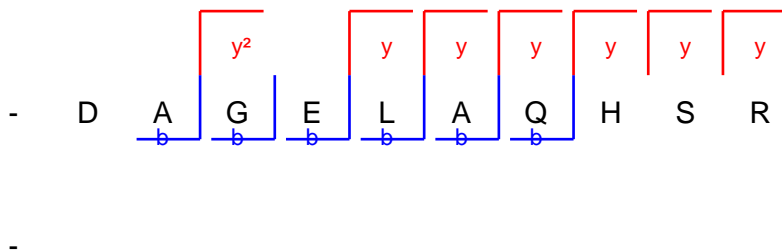

RO-QC-160121\_ZackD\_SS\_Set\_01\_Fraction 6734 FTMS; HCl 96.6 464.92 SMIM13

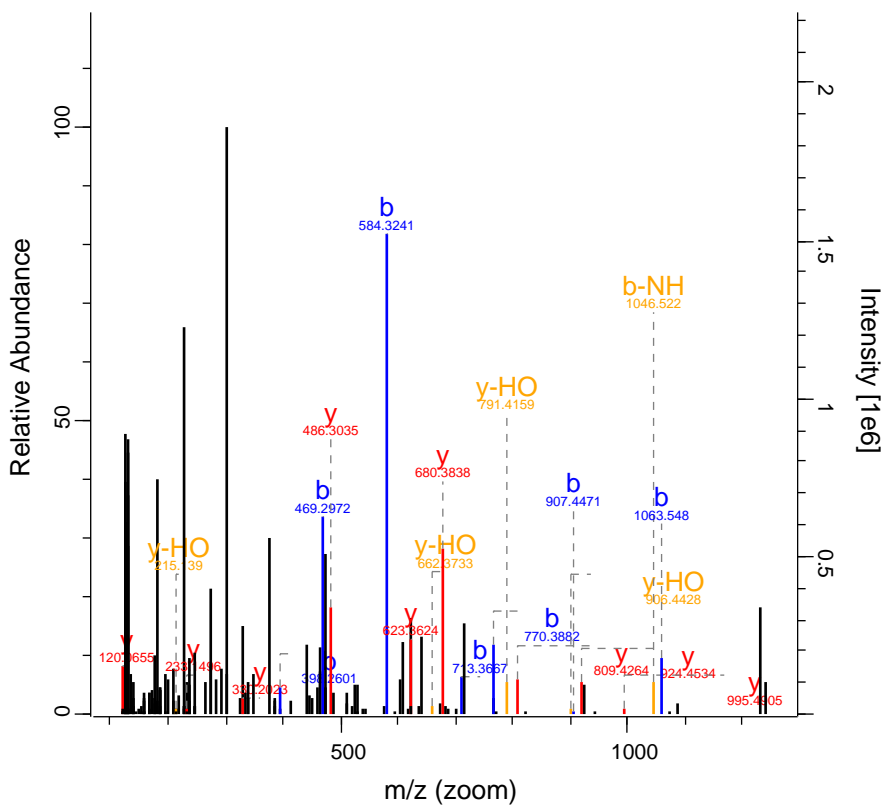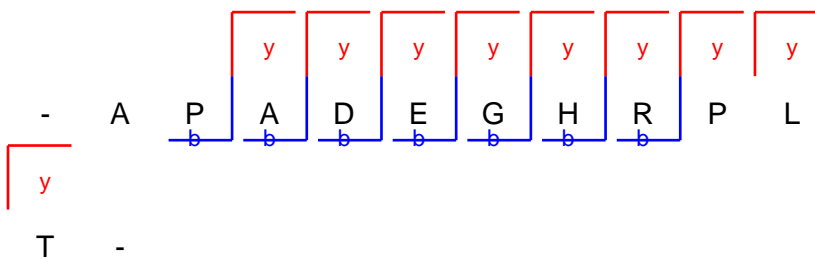



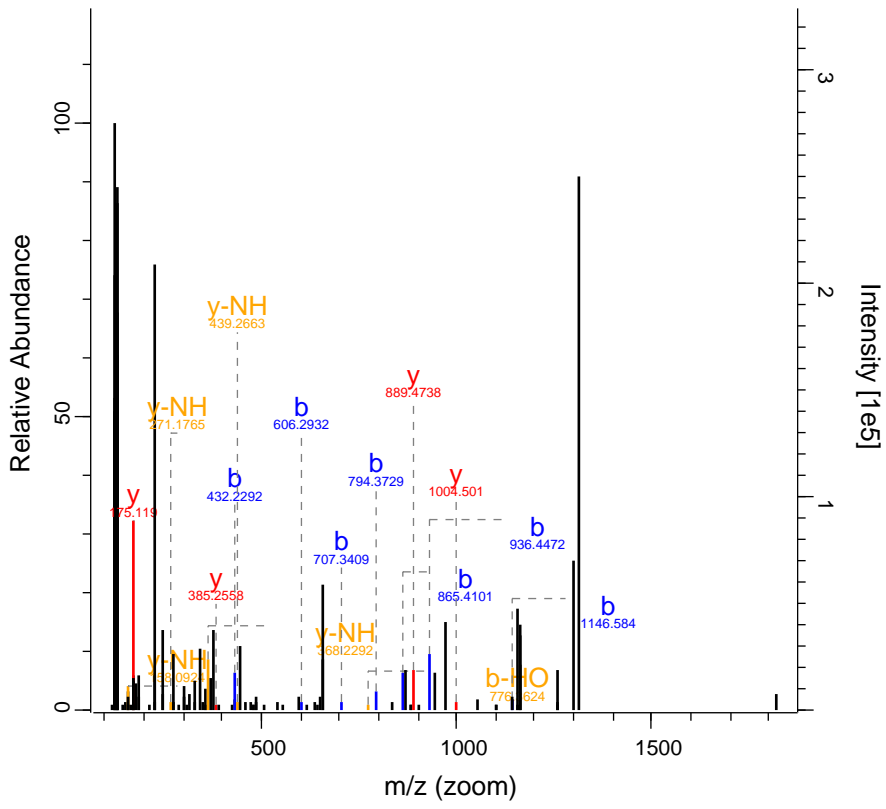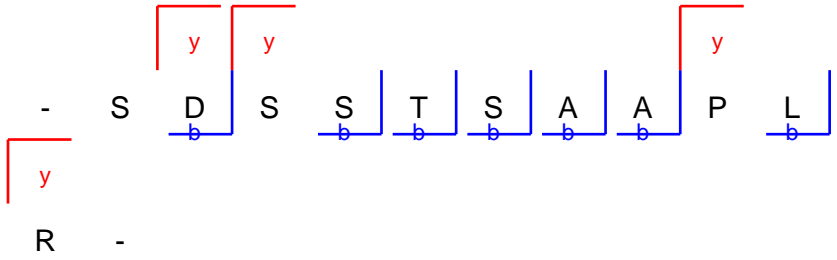

R -

RO-QC-160121\_ZackD\_SS\_Set\_01\_Fraction 7099 FTMS; HC 131.52 660.85 PEX26

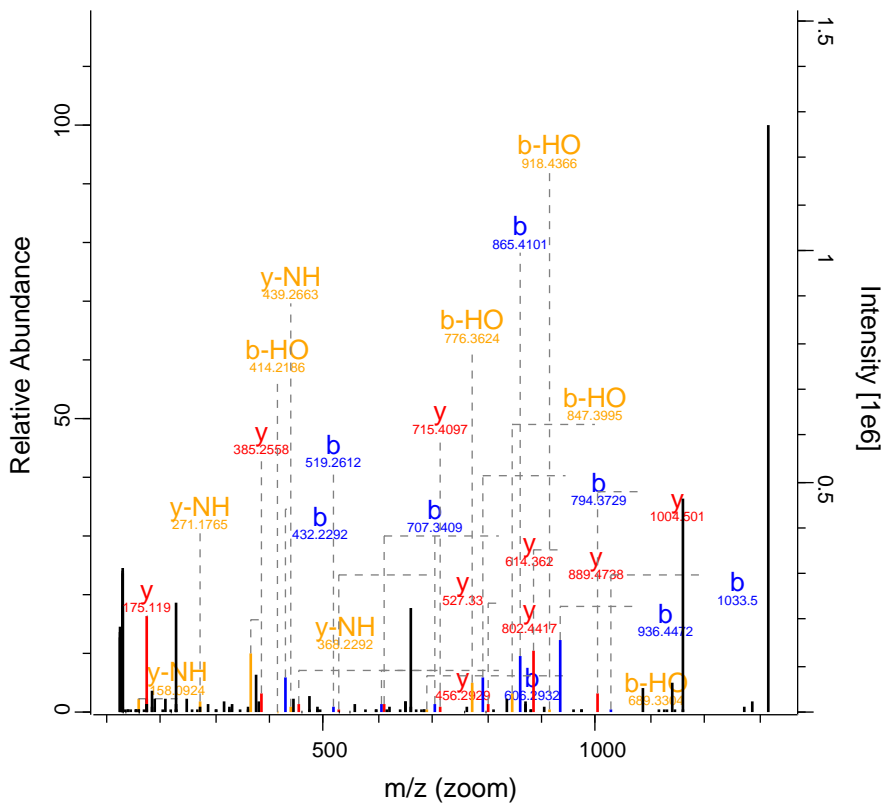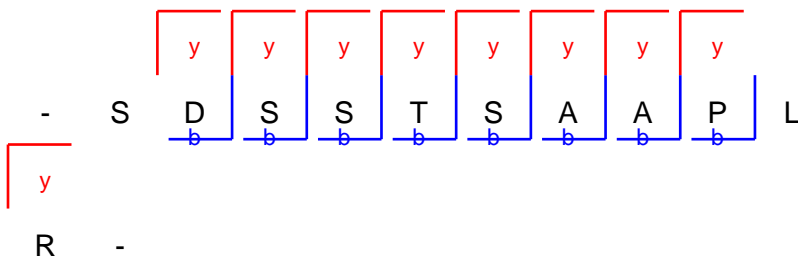

RO-QC-160121\_ZackD\_SS\_Set\_01\_Fraction 7407 FTMS; HC 140.88 699.34 TK2

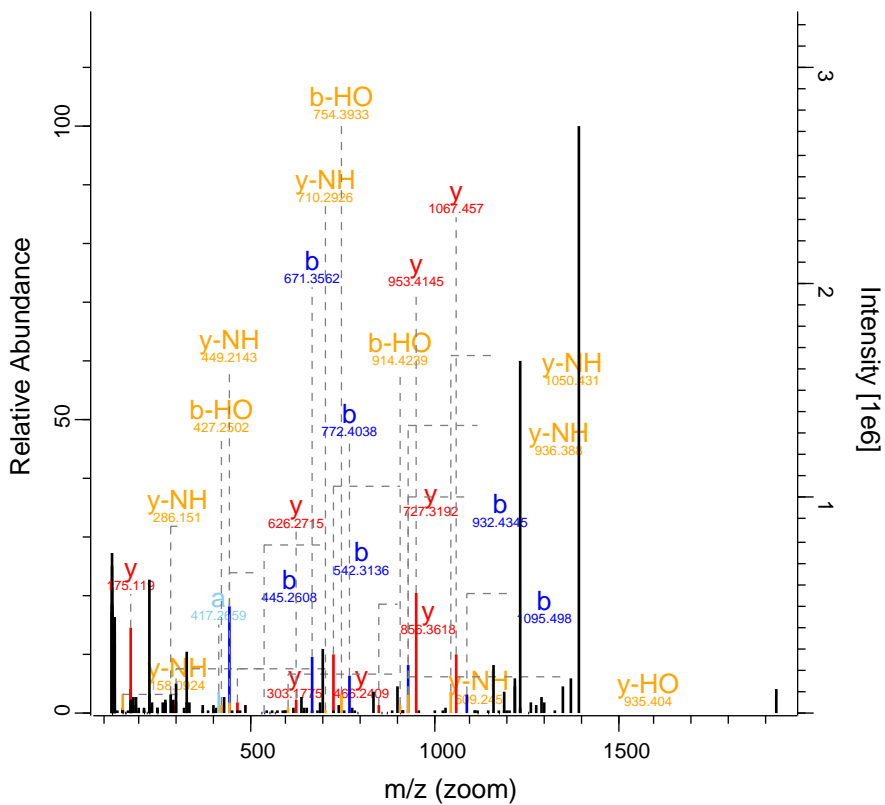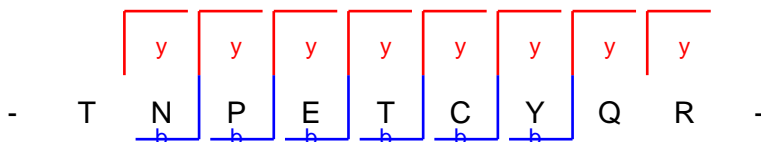

RO-QC-160121\_ZackD\_SS\_Set\_01\_Fraction 8303 FTMS; HCl 167.2 860.94 CNOT8

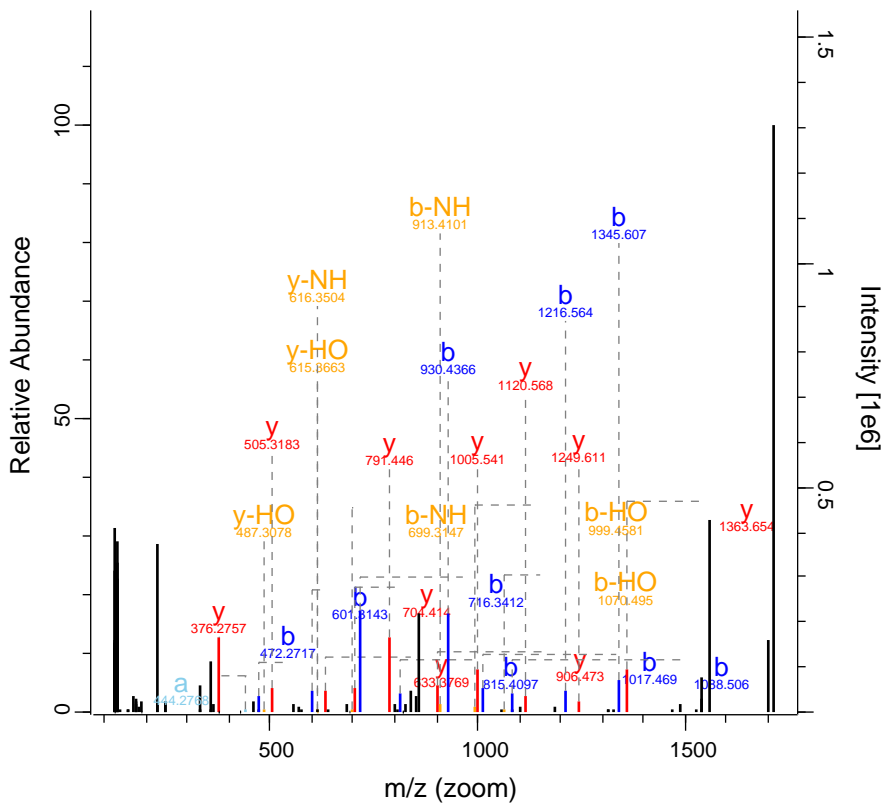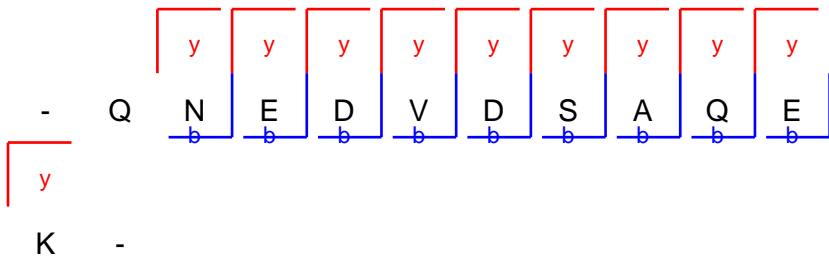

RO-QC-160121\_ZackD\_SS\_Set\_01\_Fraction 8575 FTMS; HCl 94.77 761.91 UBXXN2B

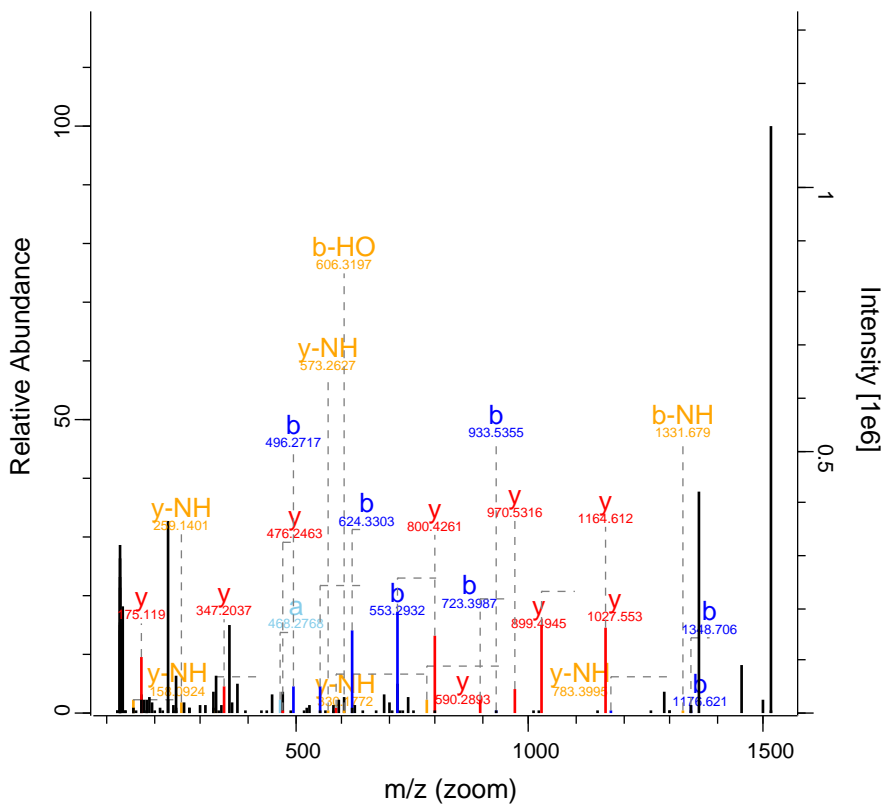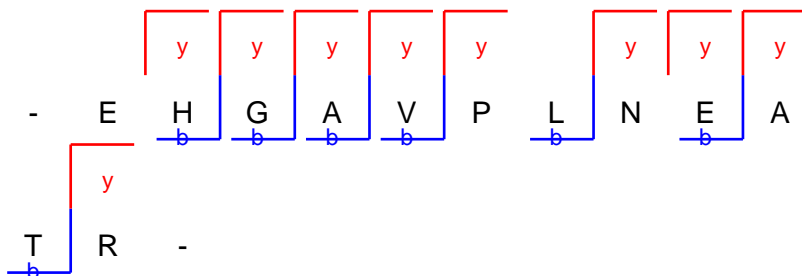

RO-QC-160121\_ZackD\_SS\_Set\_01\_Fraction 9009 FTMS; HCl; 91.21 685.06 AMER1

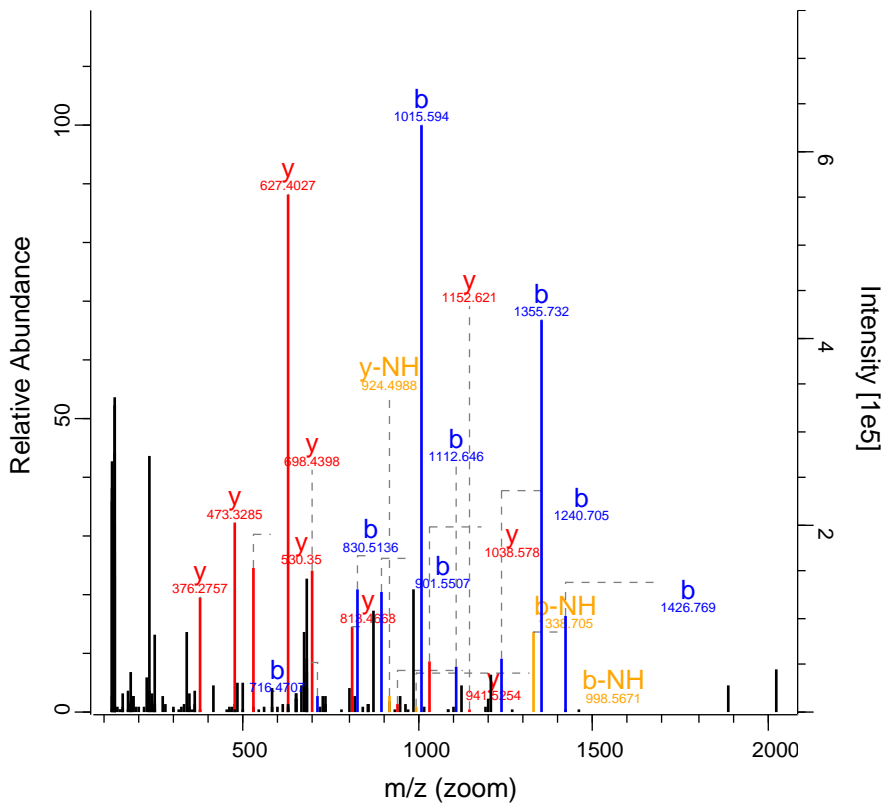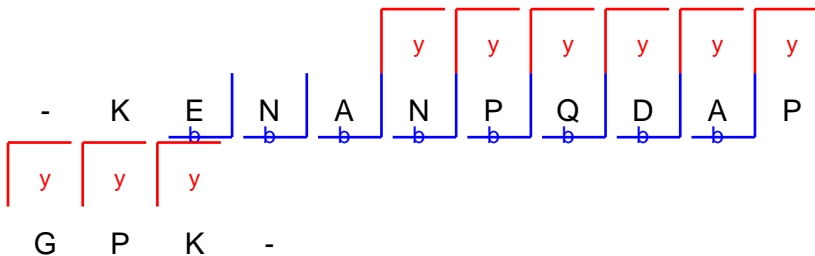

RO-QC-160121\_ZackD\_SS\_Set\_01\_Fraction 9107 FTMS; HCl 84.74 661.83 TMEM47

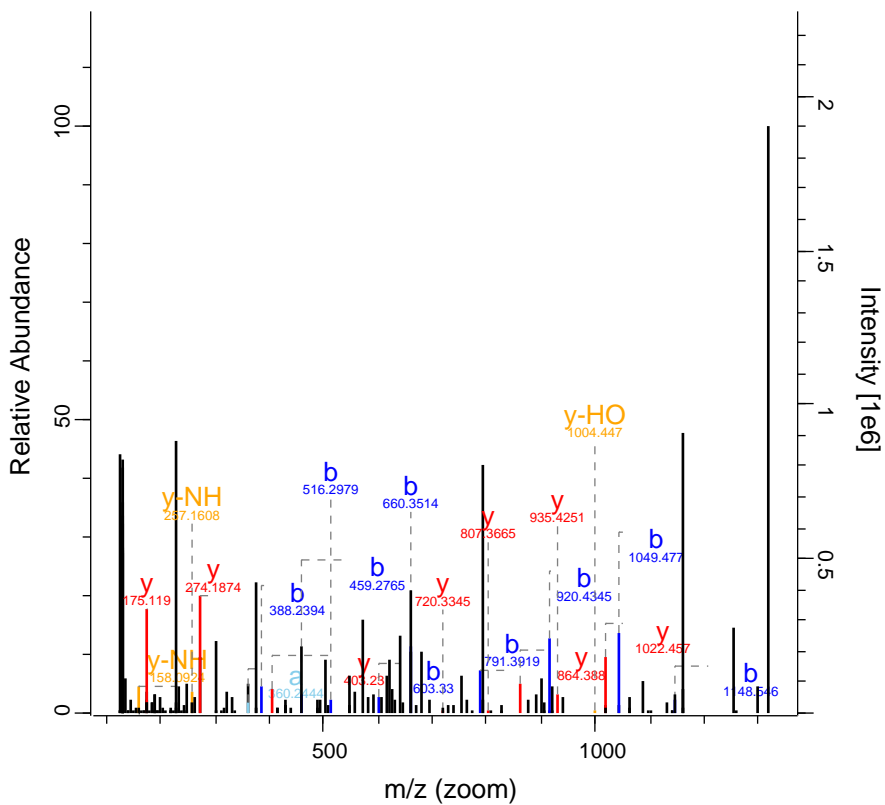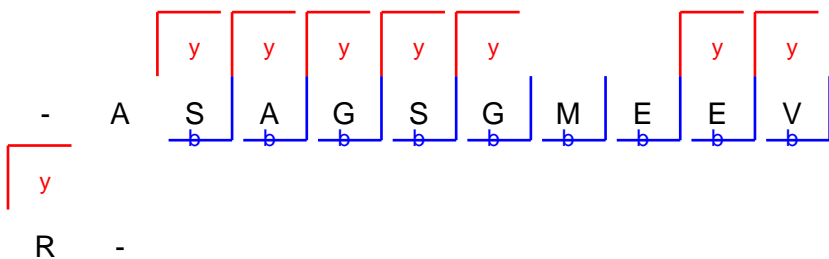

R -

RO-QC-160121\_ZackD\_SS\_Set\_01\_Fractio 11328 FTMS; HC 111.06 818.98 TRPT1

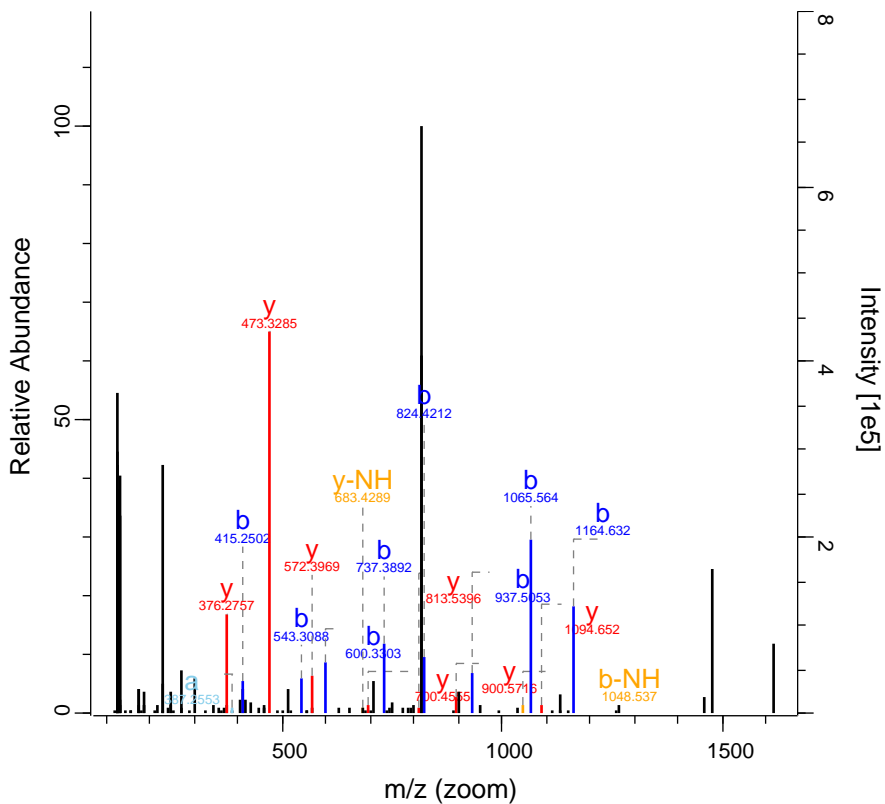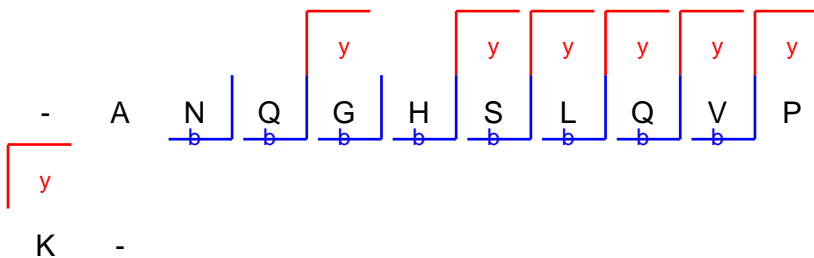



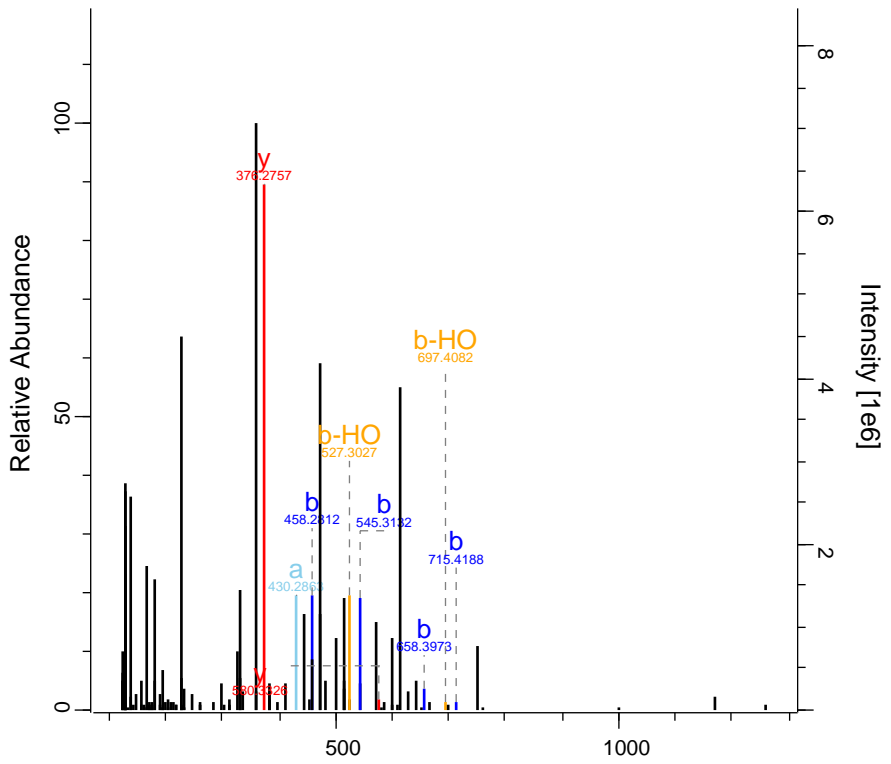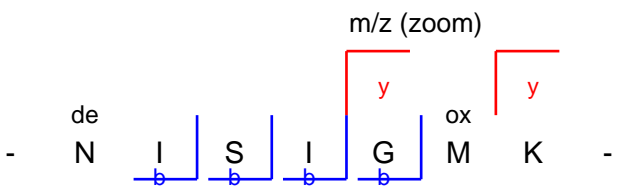

RO-QC-160121\_ZackD\_SS\_Set\_01\_Fraction 12071 FTMS; HC 47.08 943.51 CDCA3

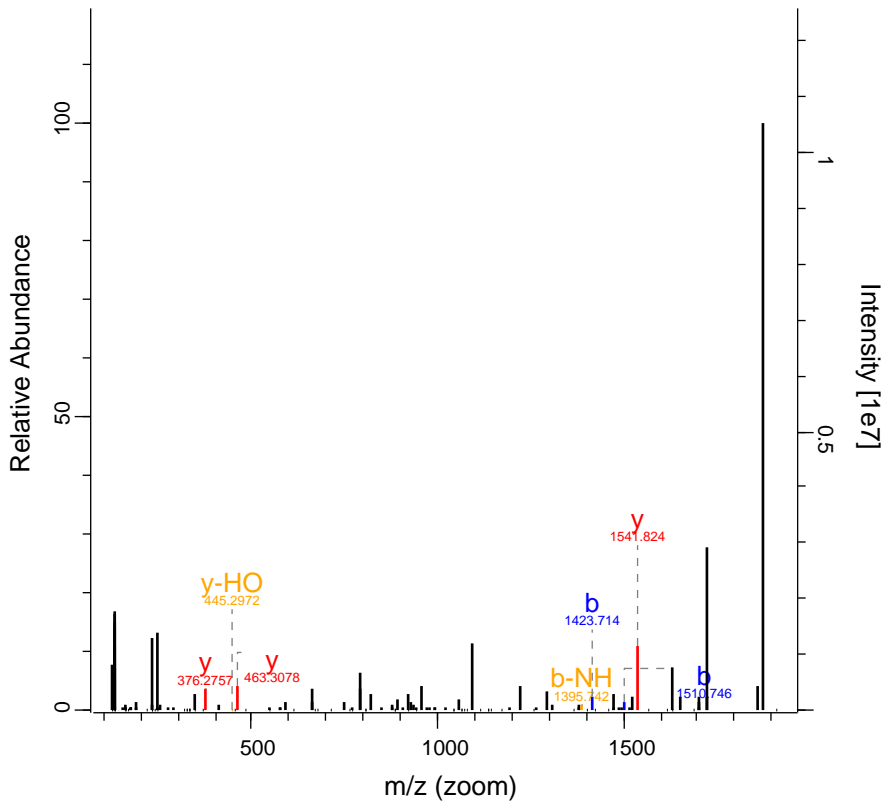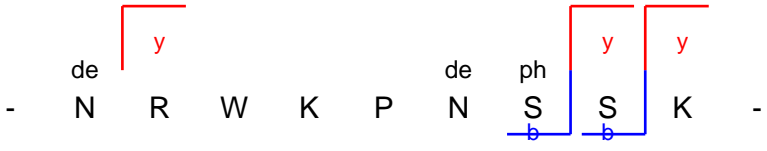

RO-QC-160121\_ZackD\_SS\_Set\_01\_Fractio 12127 FTMS; HC 146.79 644.39 C6orf47

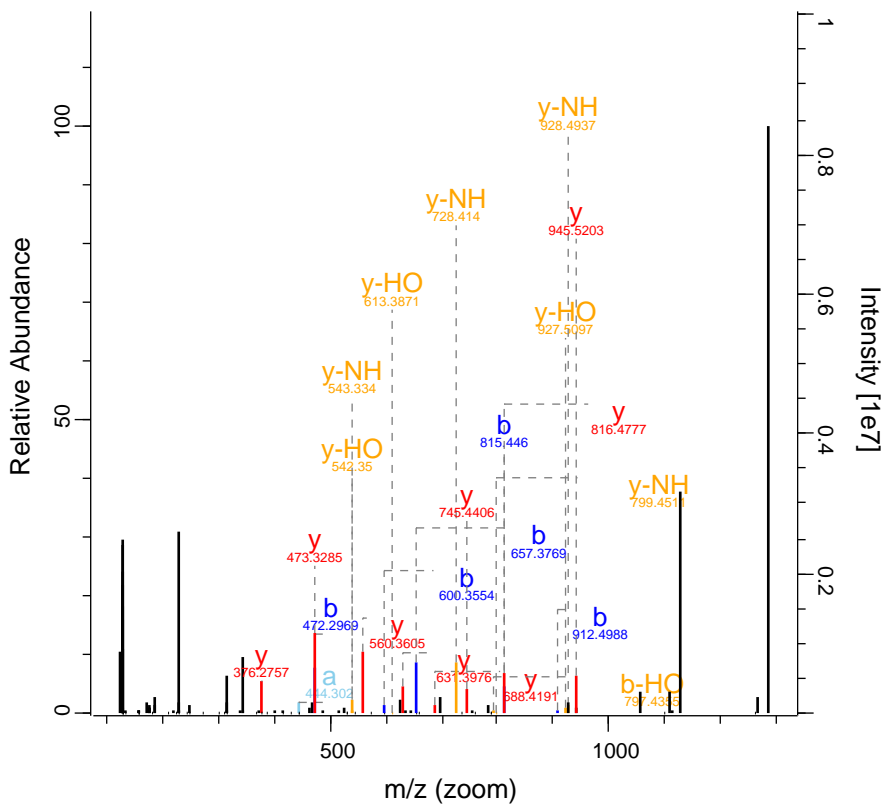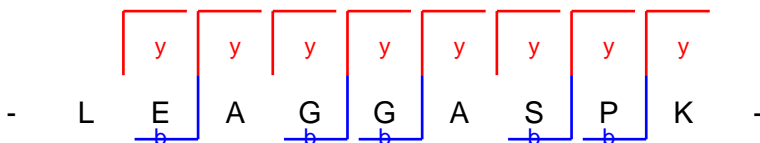

RO-QC-160121\_ZackD\_SS\_Set\_01\_Fraction1 12153 FTMS; HCl 69.98 778.9 SLC46A1

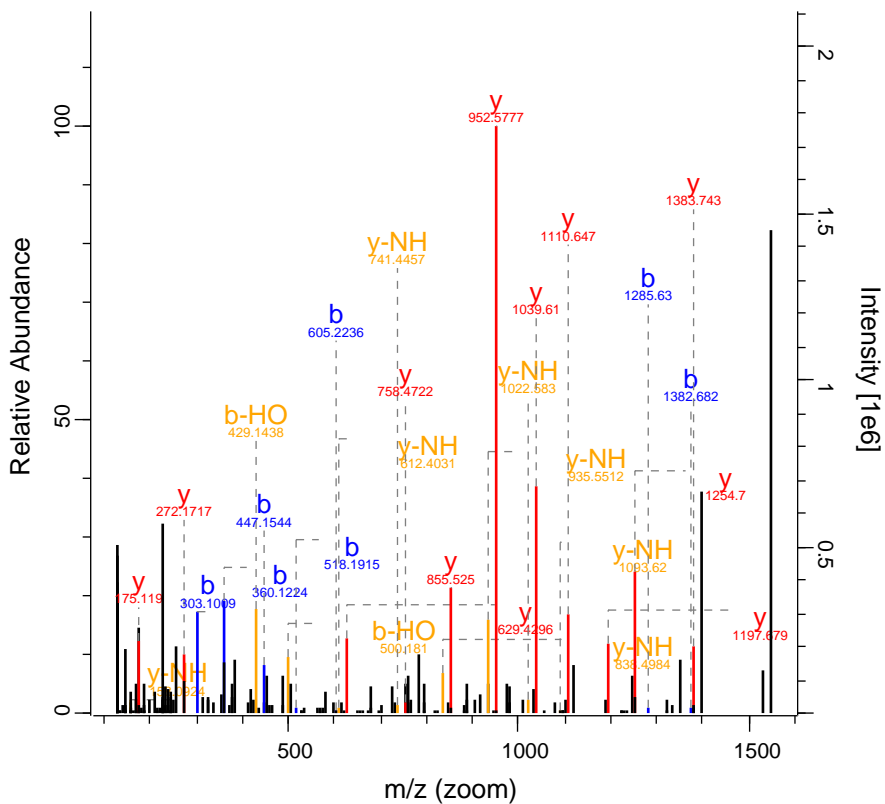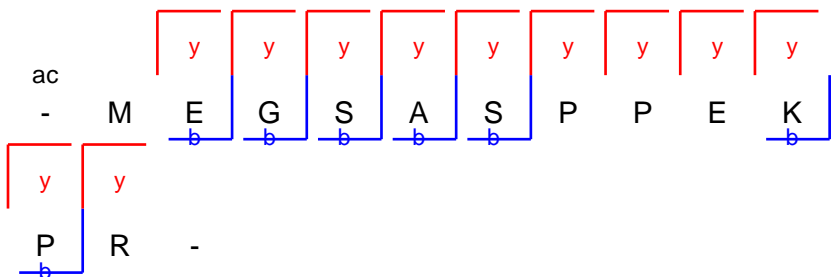

RO-QC-160121\_ZackD\_SS\_Set\_01\_Fraction\_4

12483 FTMS; HCD 59.64 393.9

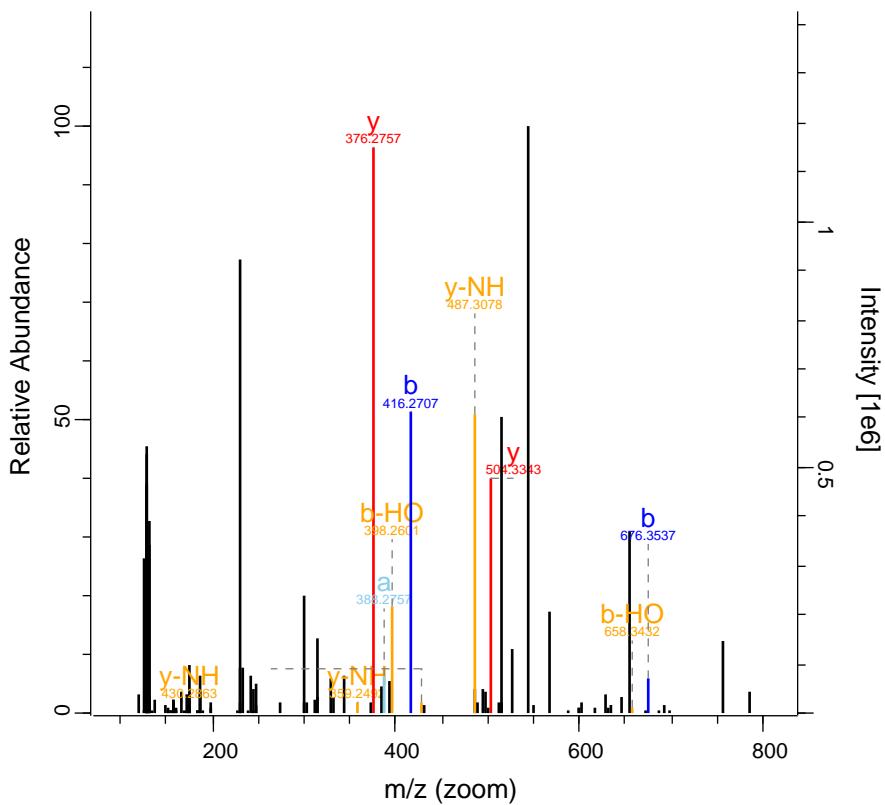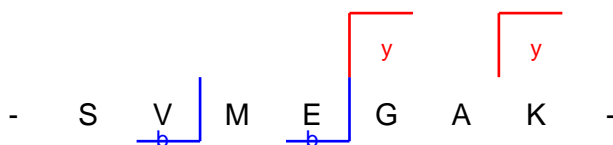

RO-QC-160121\_ZackD\_SS\_Set\_01\_Fractio 12706 FTMS; HC 126.76 779.92 COL26A1

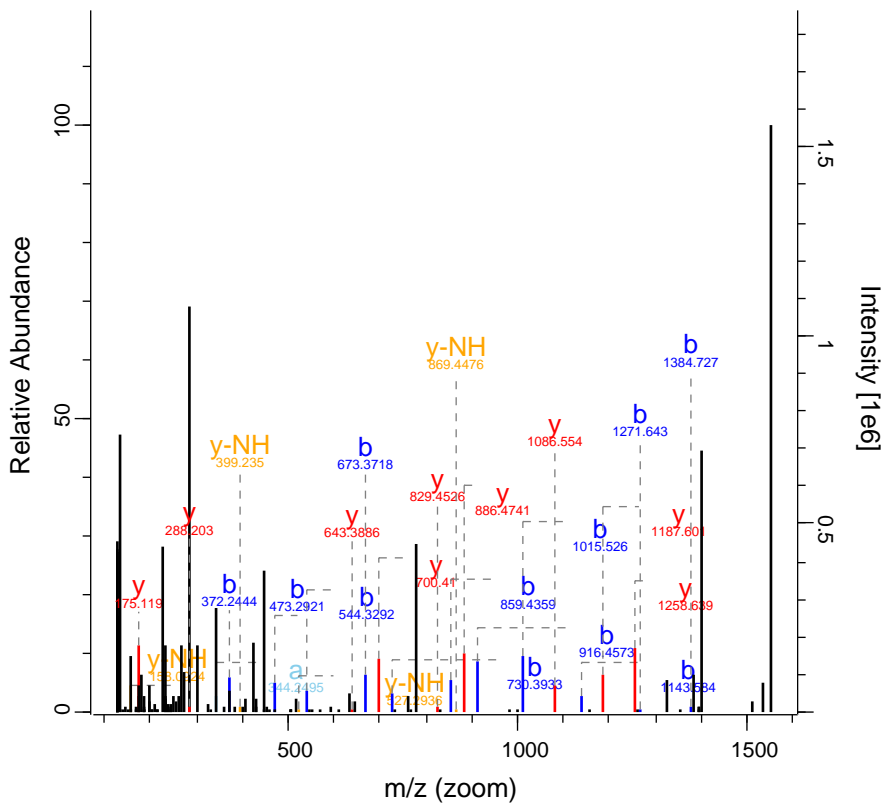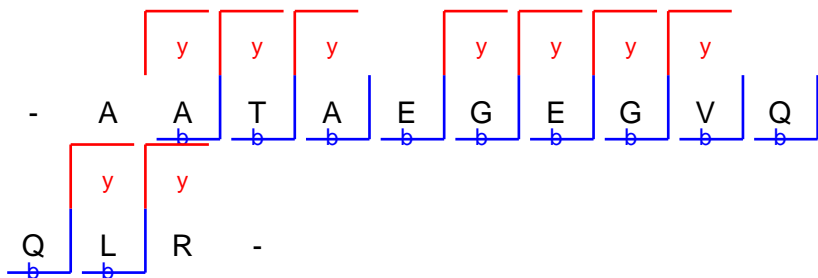

Raw File

Scan

Method

Score

m/z

RO-QC-160121\_ZackD\_SS\_Set\_01\_Fraction\_4

13003

FTMS; HCD

94.16

364.86

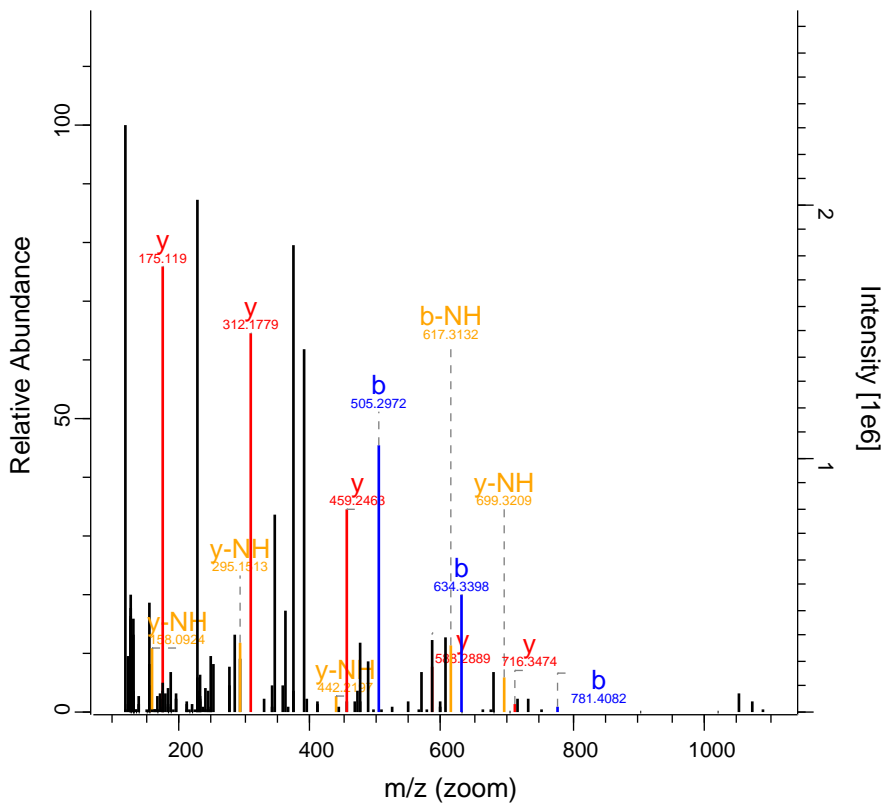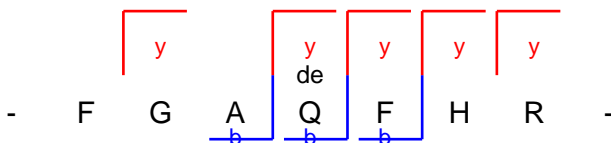

RO-QC-160121\_ZackD\_SS\_Set\_01\_Fraction 14276 FTMS; HCl 86.88 833.9 GLRX2

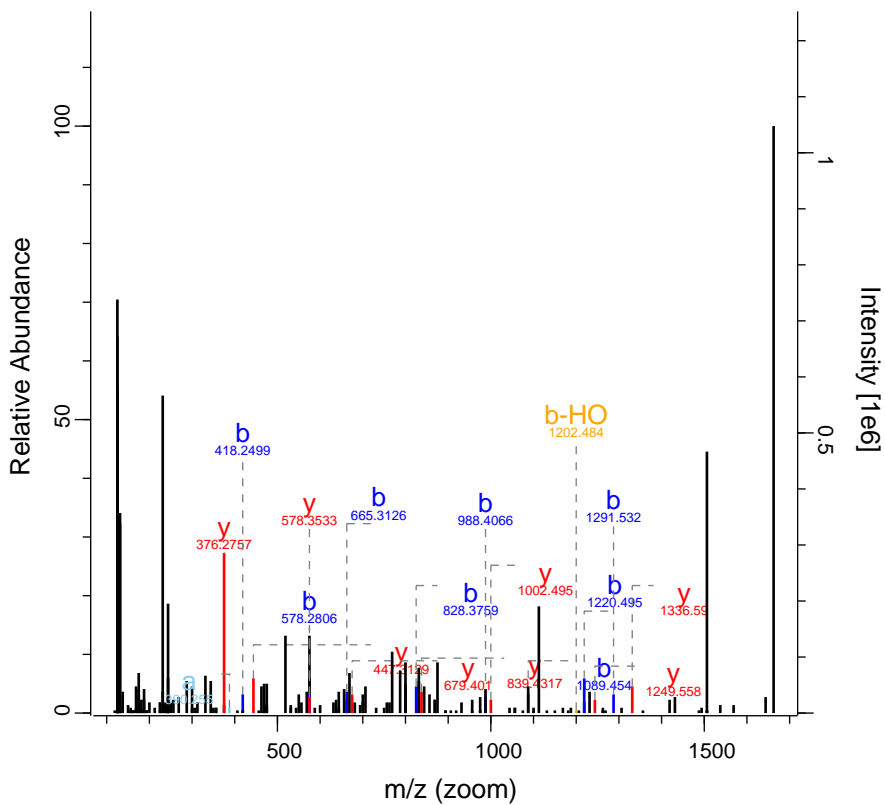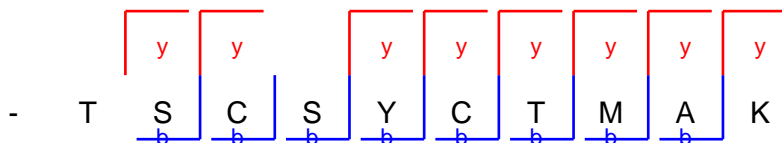



RO-QC-160121\_ZackD\_SS\_Set\_01\_Fraction 14706 FTMS; HC 60.68 458.95 FAM117A

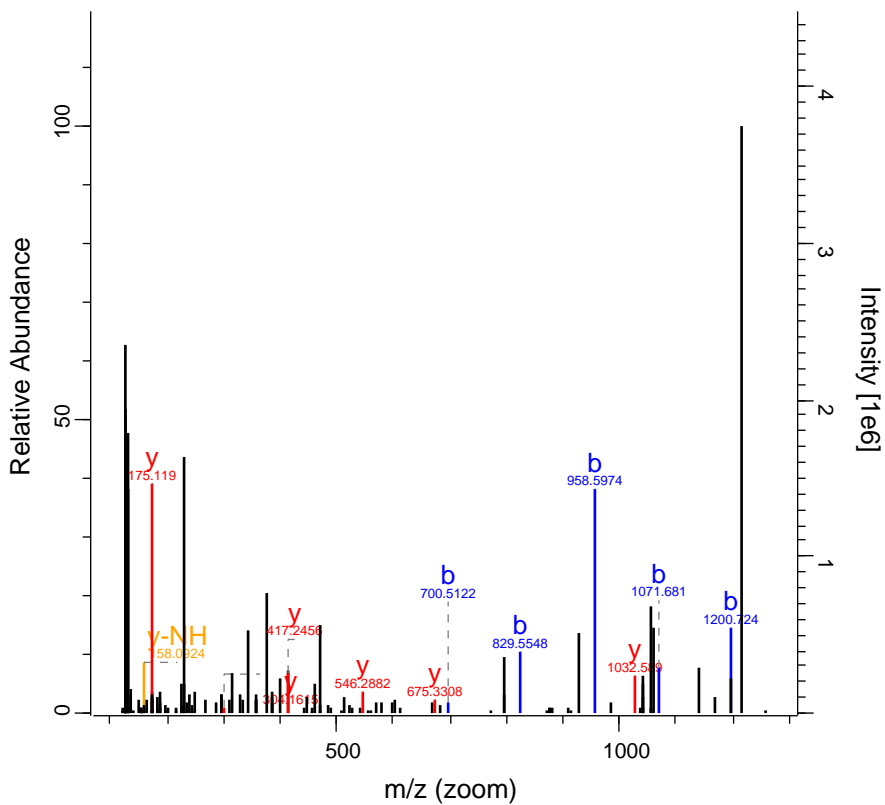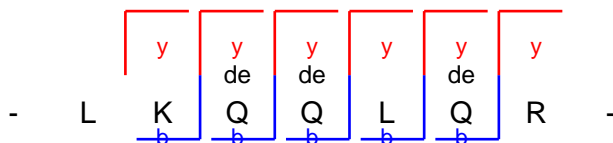

RO-QC-160121\_ZackD\_SS\_Set\_01\_Fraction 14924 FTMS; HC 62.66 458.95 FAM117A

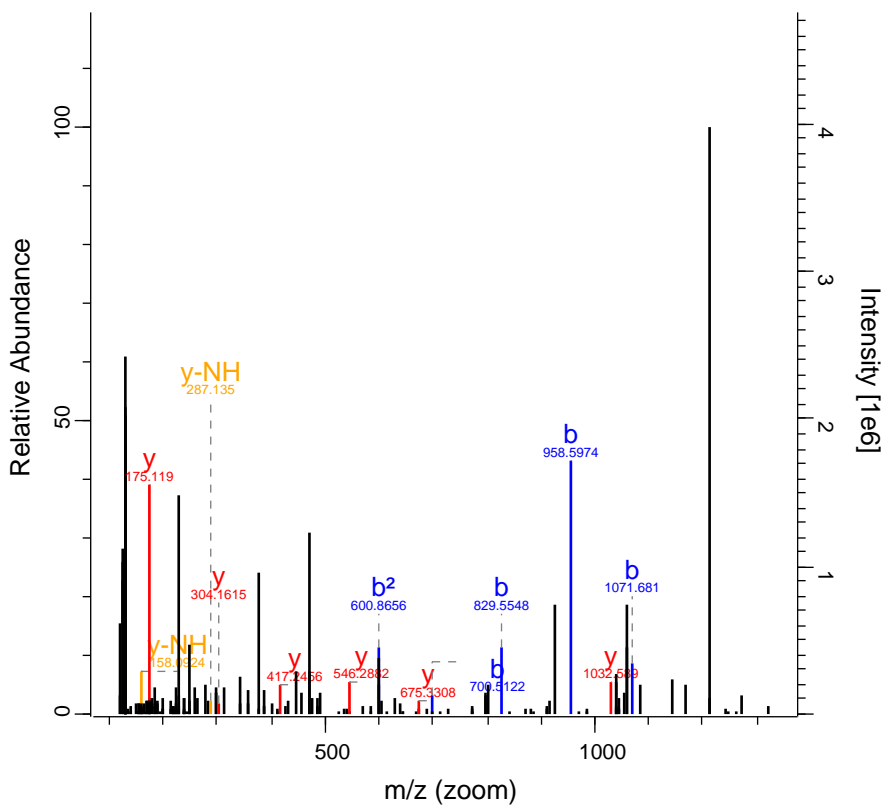

m/z (zoom)

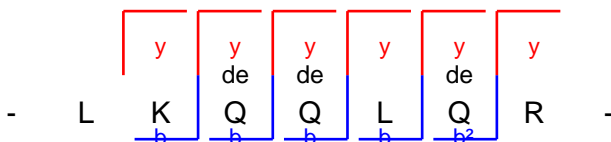

RO-QC-160121\_ZackD\_SS\_Set\_01\_Fractio 15497 FTMS; HC 113.62 679.91 CLDN19

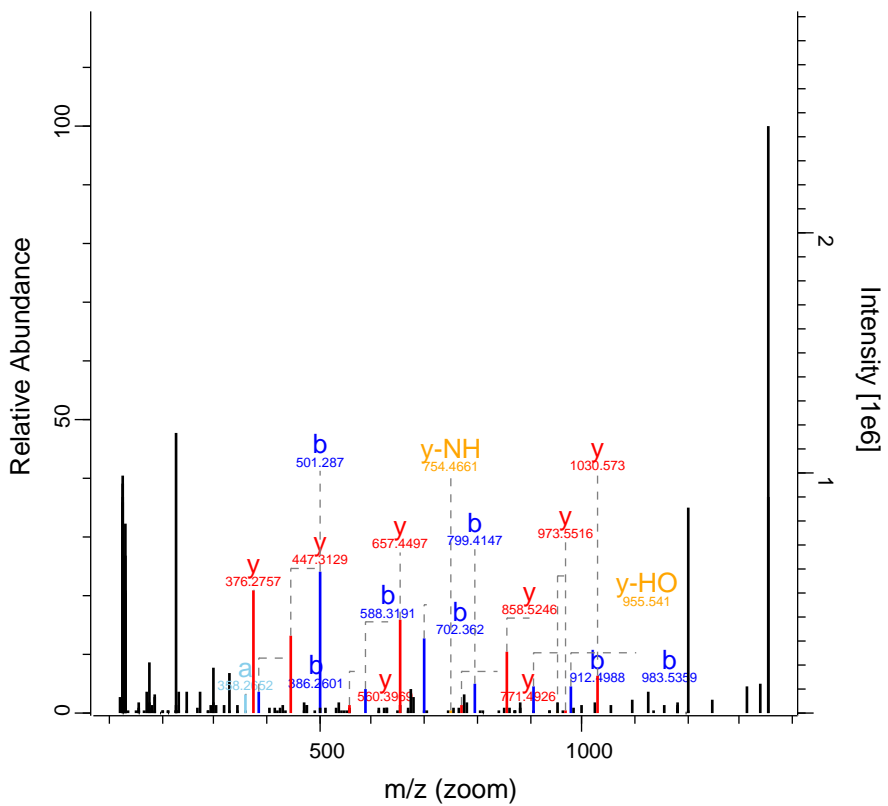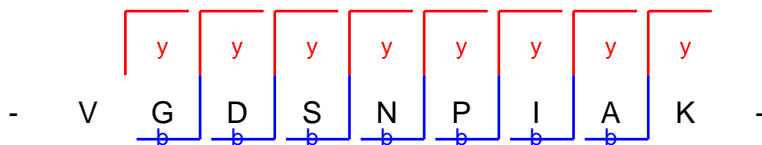

RO-QC-160121\_ZackD\_SS\_Set\_01\_Fraction 15541 FTMS; HC 73.26 824.47 AIPL1

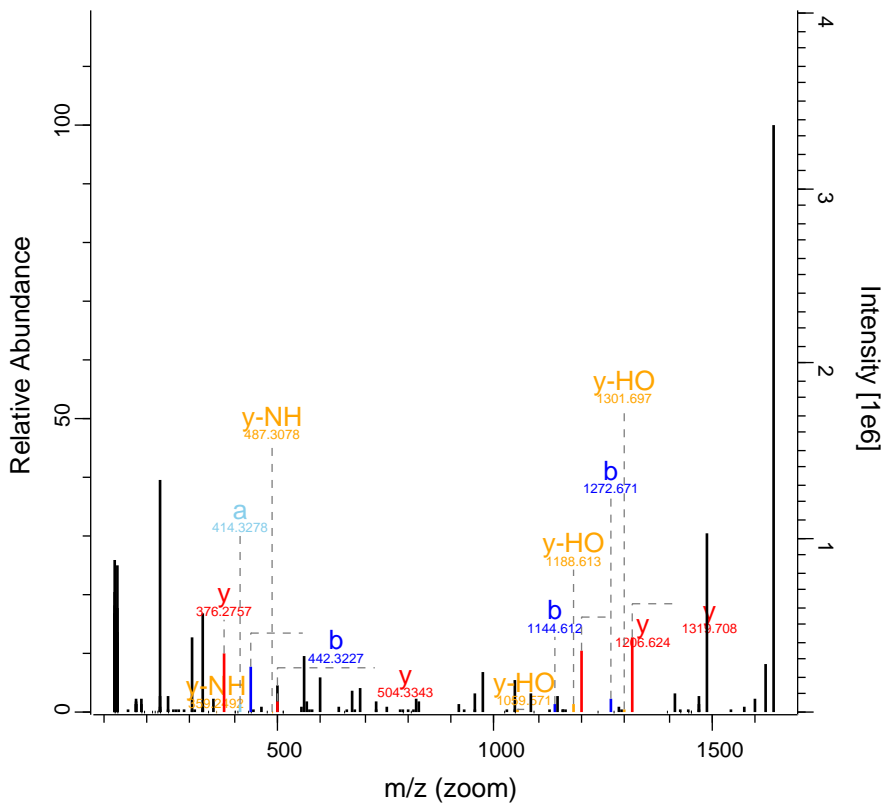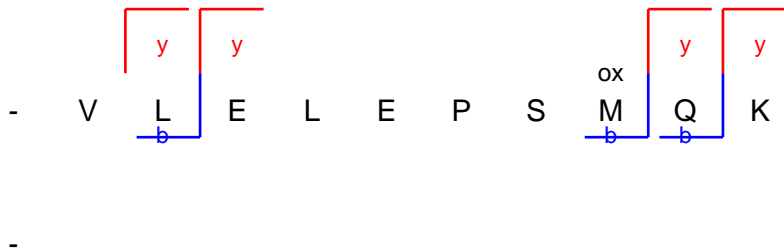

RO-QC-160121\_ZackD\_SS\_Set\_01\_Fraction 15559 FTMS; HC 96.71 691.39 SLC7A6

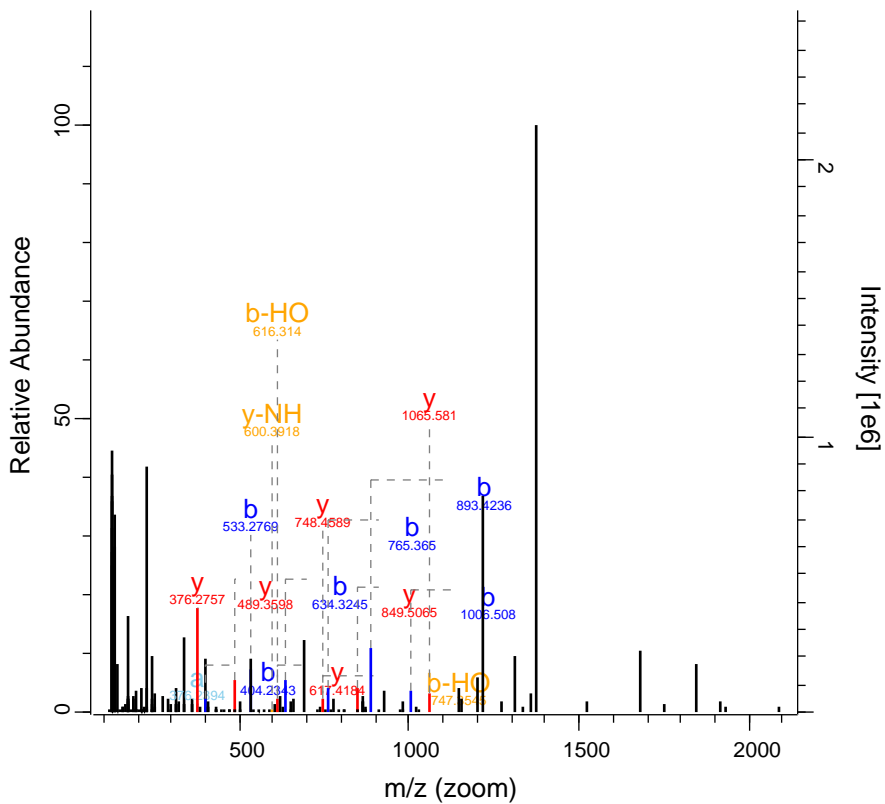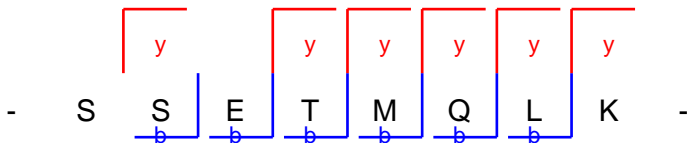

RO-QC-160121\_ZackD\_SS\_Set\_01\_Fraction 15743 FTMS; HC 85.21 824.47 AIPL1

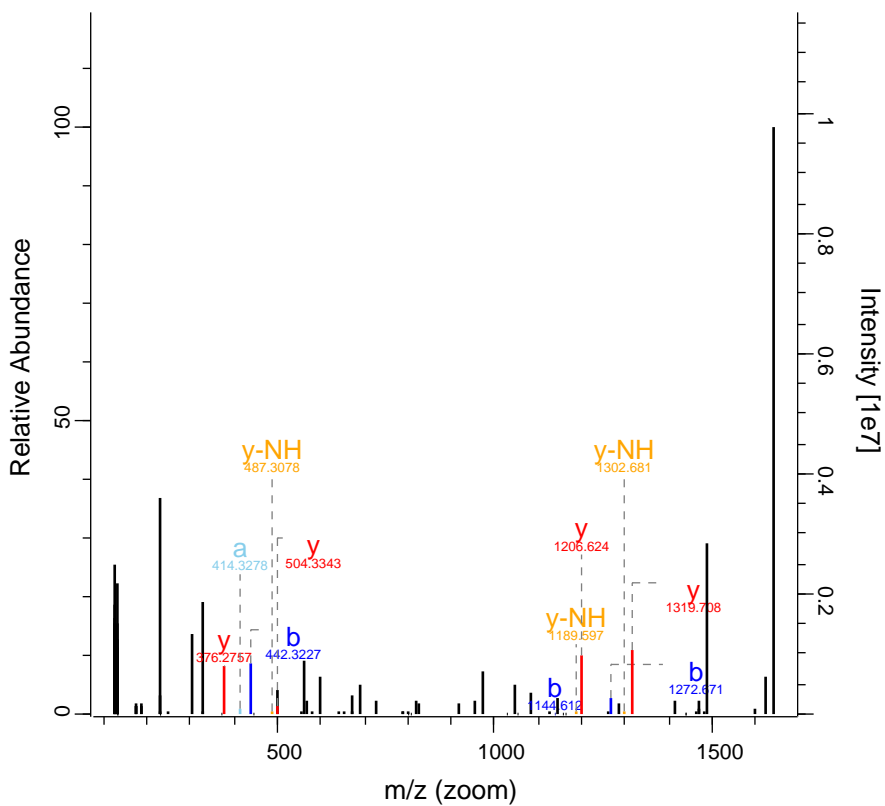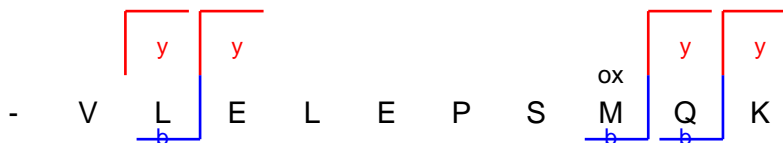

RO-QC-160121\_ZackD\_SS\_Set\_01\_Fractio 15757 FTMS; HC 107.47 691.39 SLC7A6

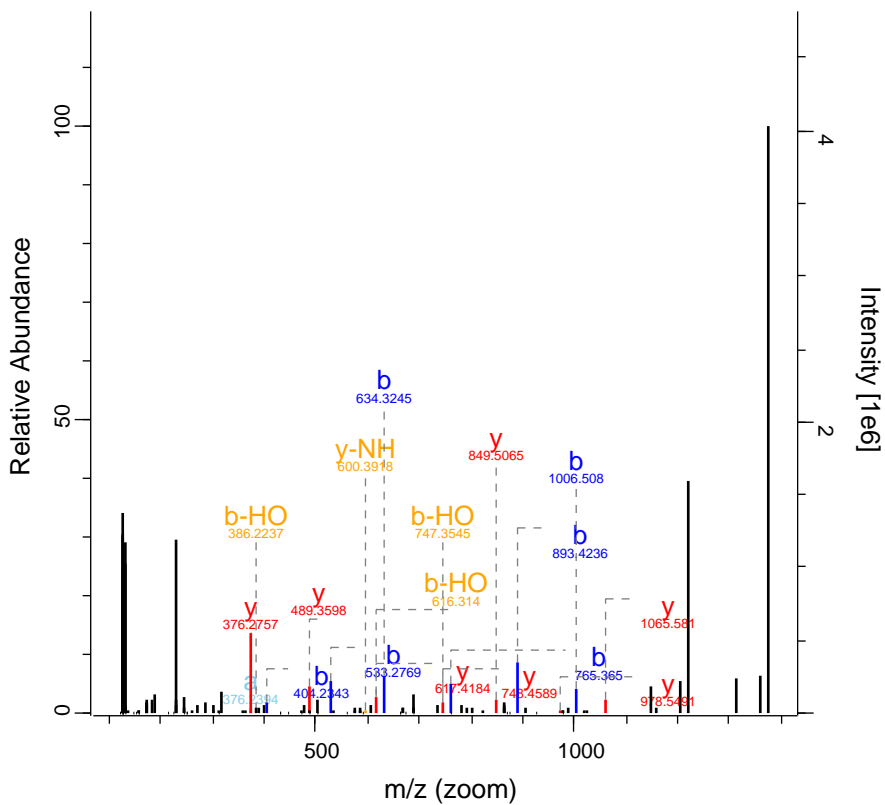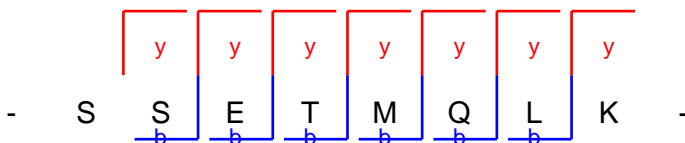

RO-QC-160121\_ZackD\_SS\_Set\_01\_Fraction16322 FTMS; HC 97.97 714.85 EID2

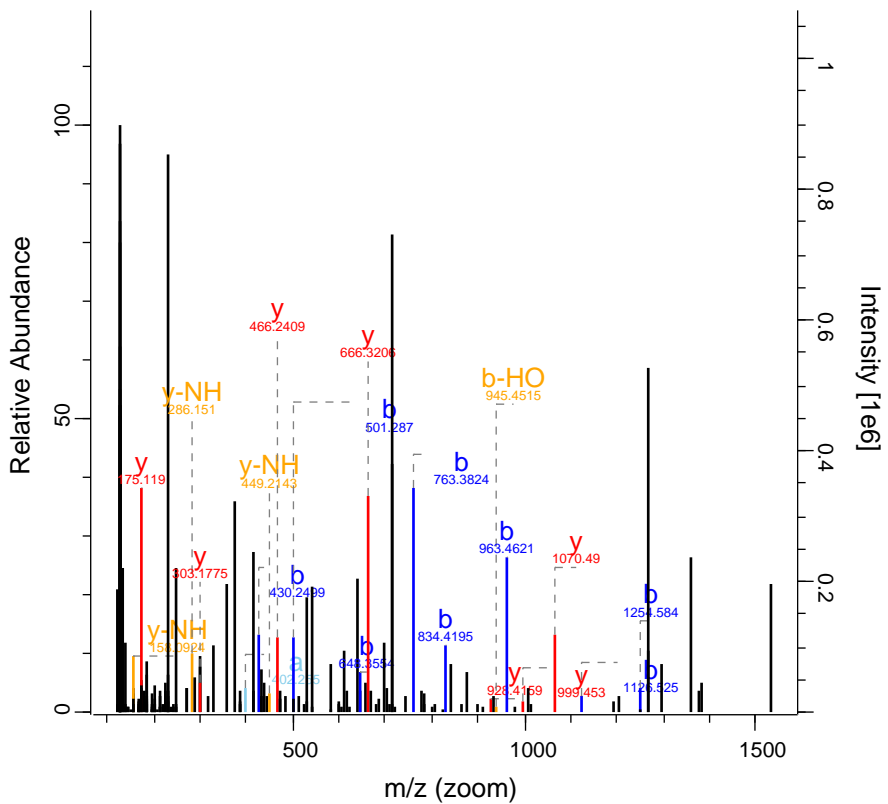

m/z (zoom)

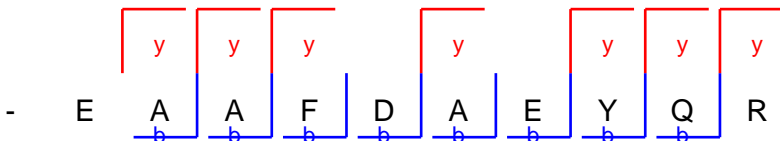



RO-QC-160121\_ZackD\_SS\_Set\_01\_Fractio 16328 FTMS; HC 104.52 823.48 KDM4D

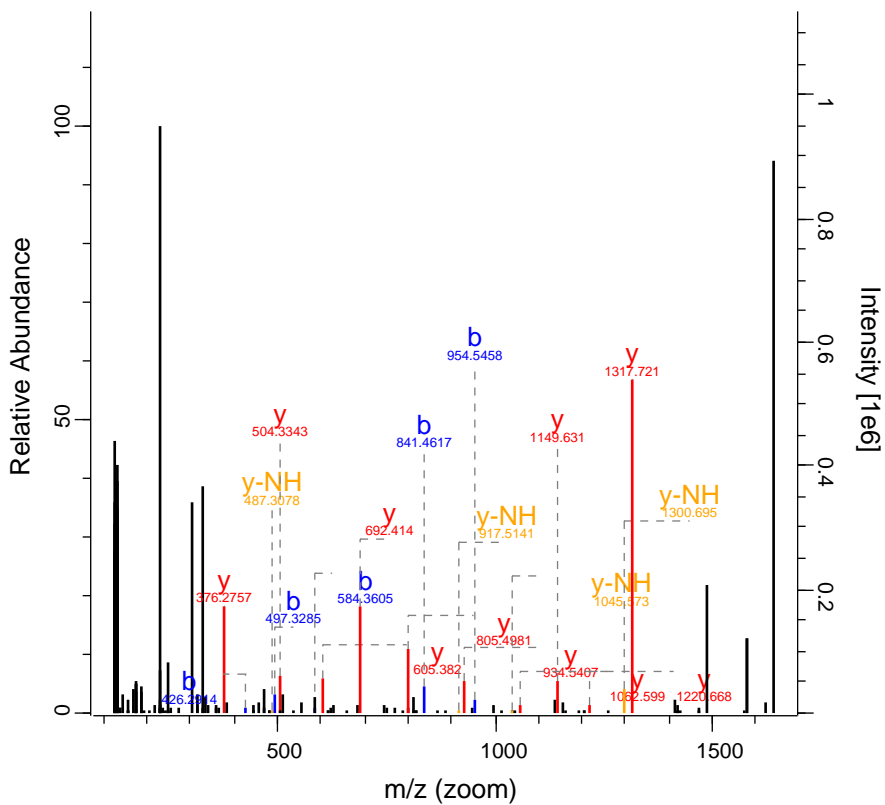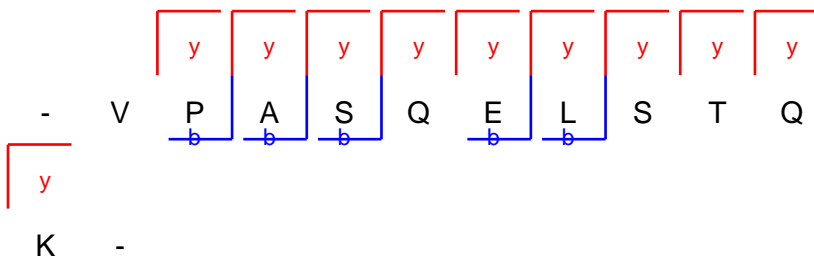

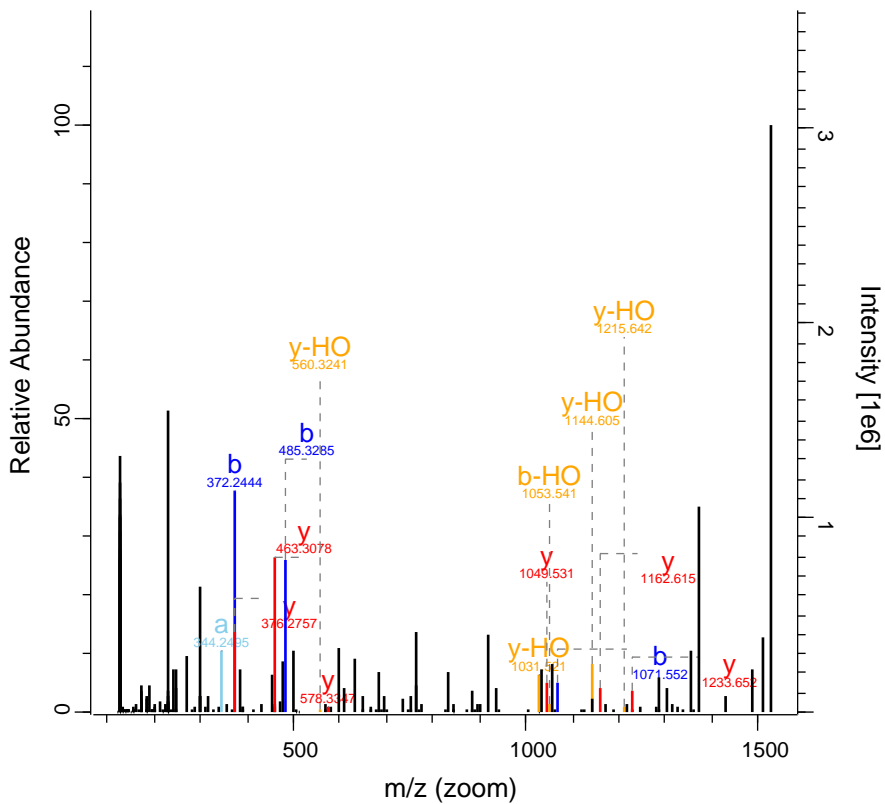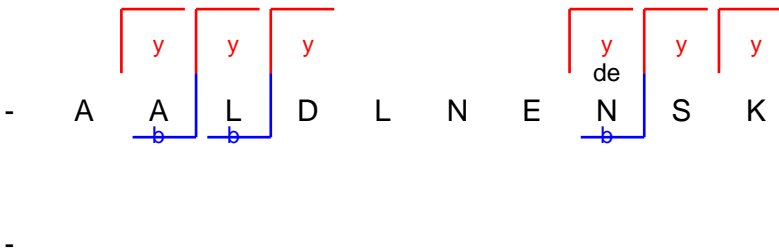

RO-QC-160121\_ZackD\_SS\_Set\_01\_Fractio 17526 FTMS; HC 143.04 719.36 GEMIN6

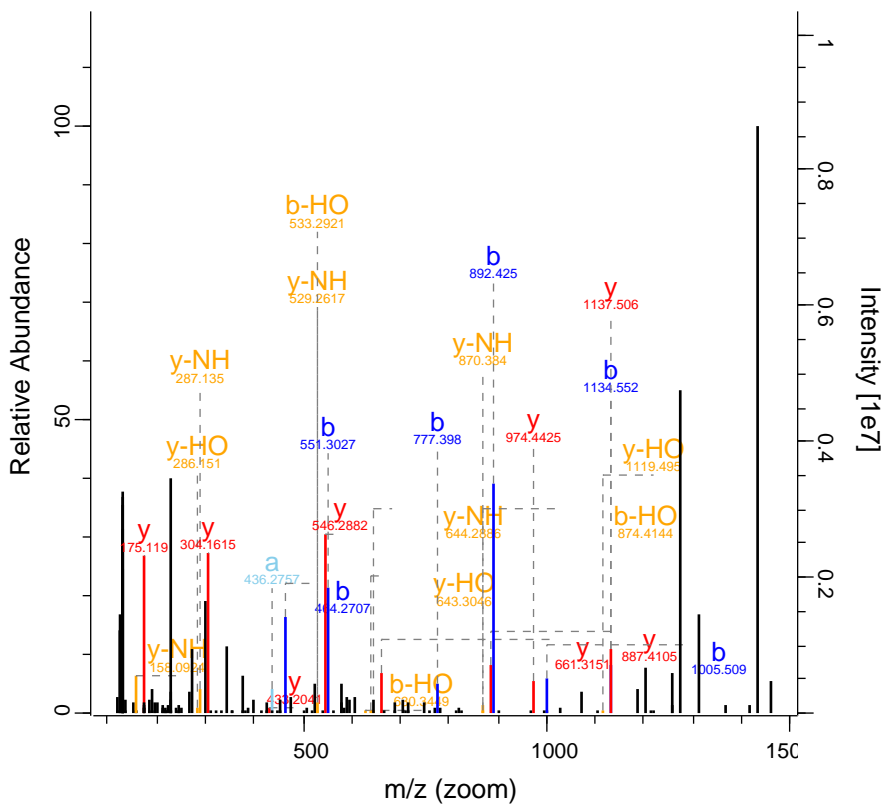

m/z (zoom)

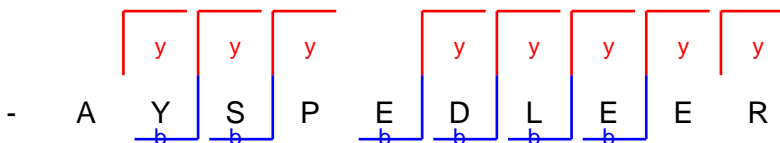

RO-QC-160121\_ZackD\_SS\_Set\_01\_Fraction 17975 FTMS; HC 46.71 648.06 DAGLA

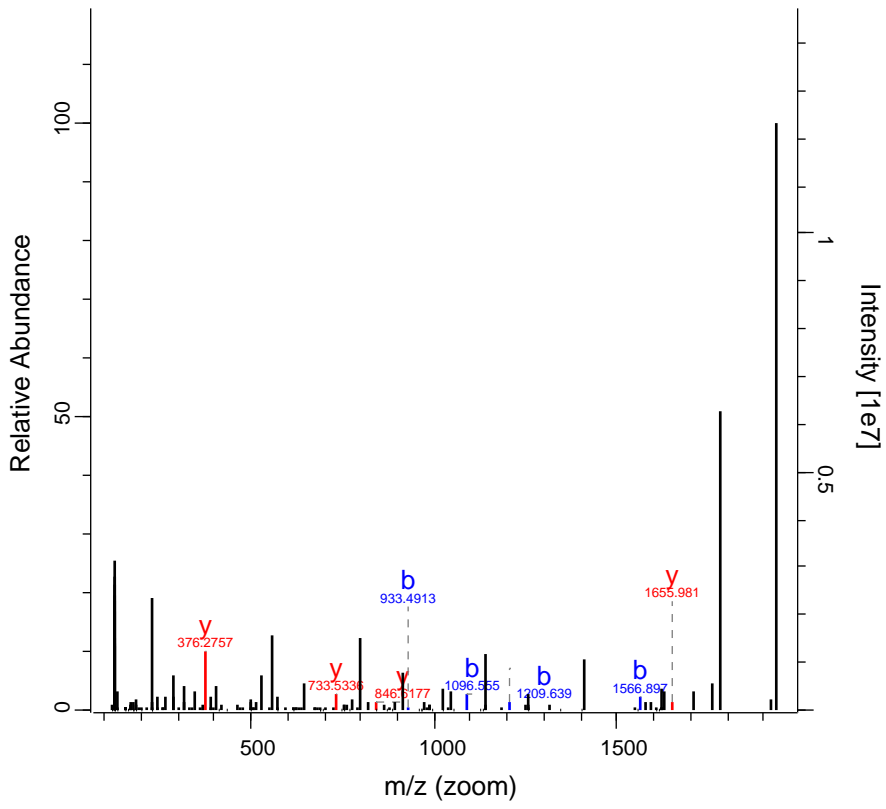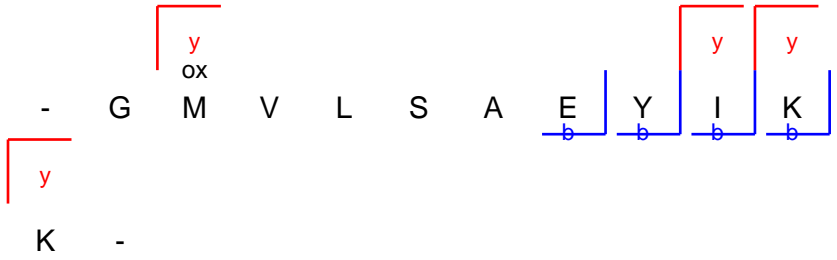

RO-QC-160121\_ZackD\_SS\_Set\_01\_Fraction18287 FTMS; HCl121.9 934.5 TBPL1

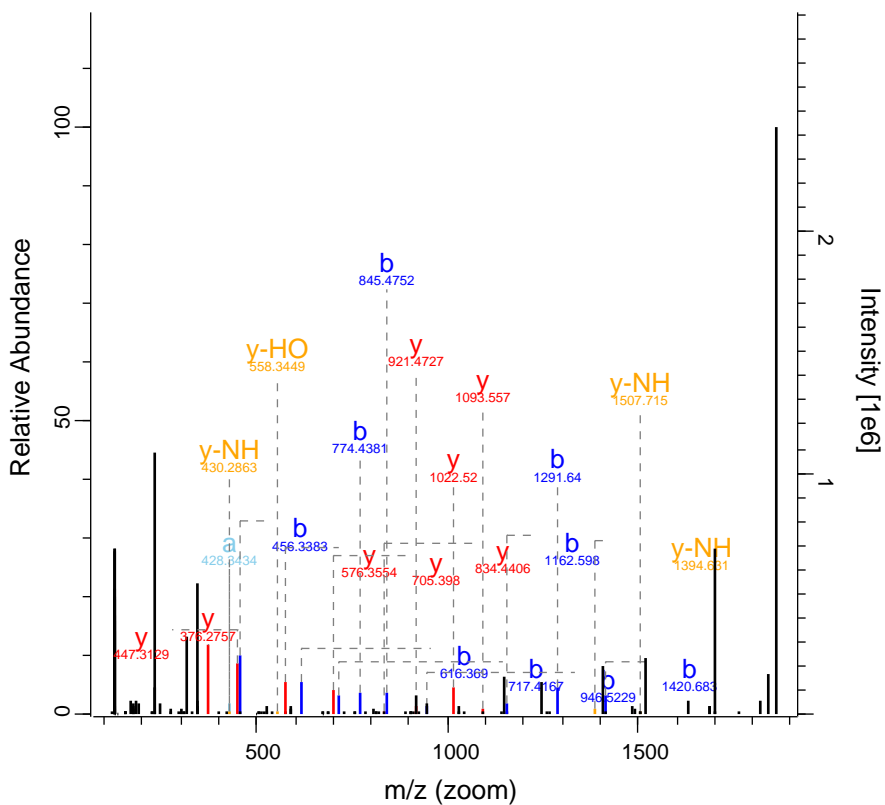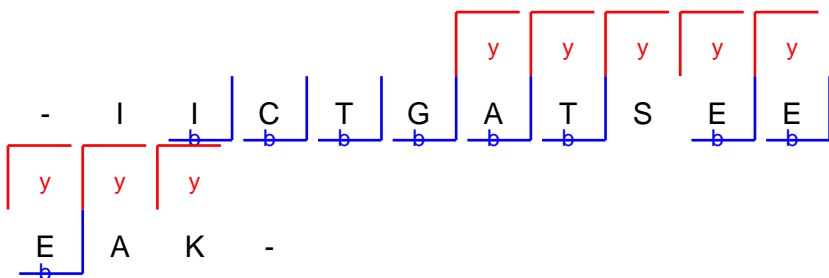

RO-QC-160121\_ZackD\_SS\_Set\_01\_Fractio 18606 FTMS; HC 109.44 713.94 SYS1

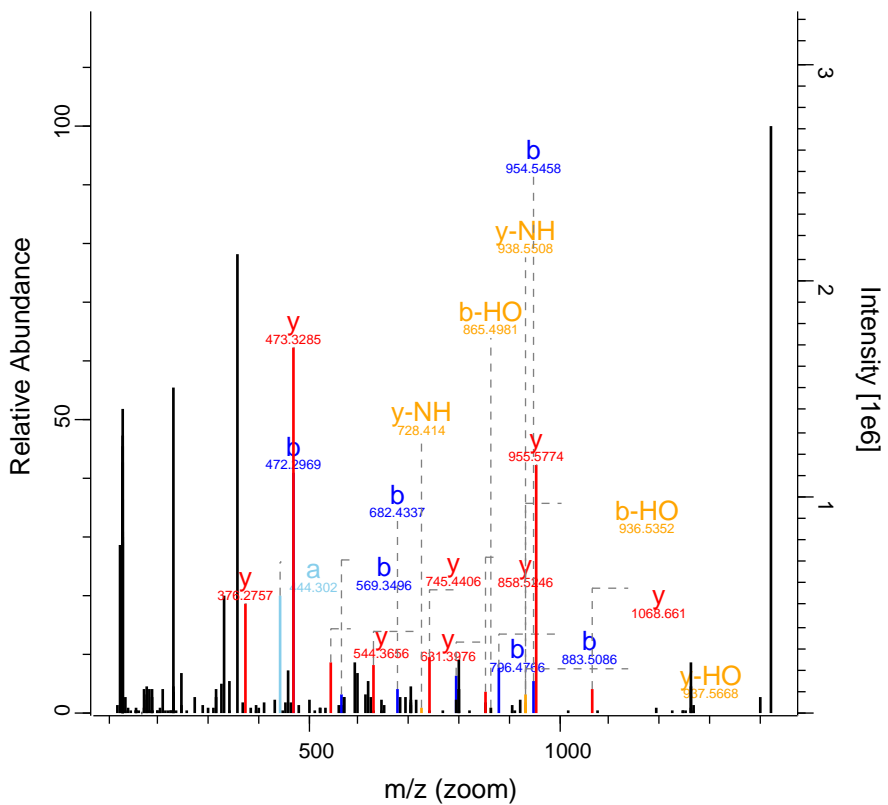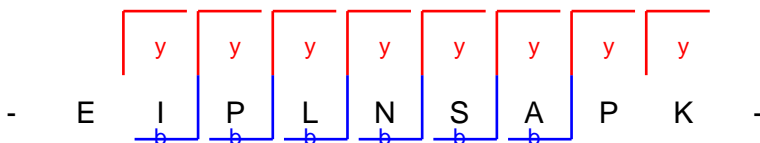

RO-QC-160121\_ZackD\_SS\_Set\_01\_Fraction 18628 FTMS; HCl 51.61 638.6 MCTP2

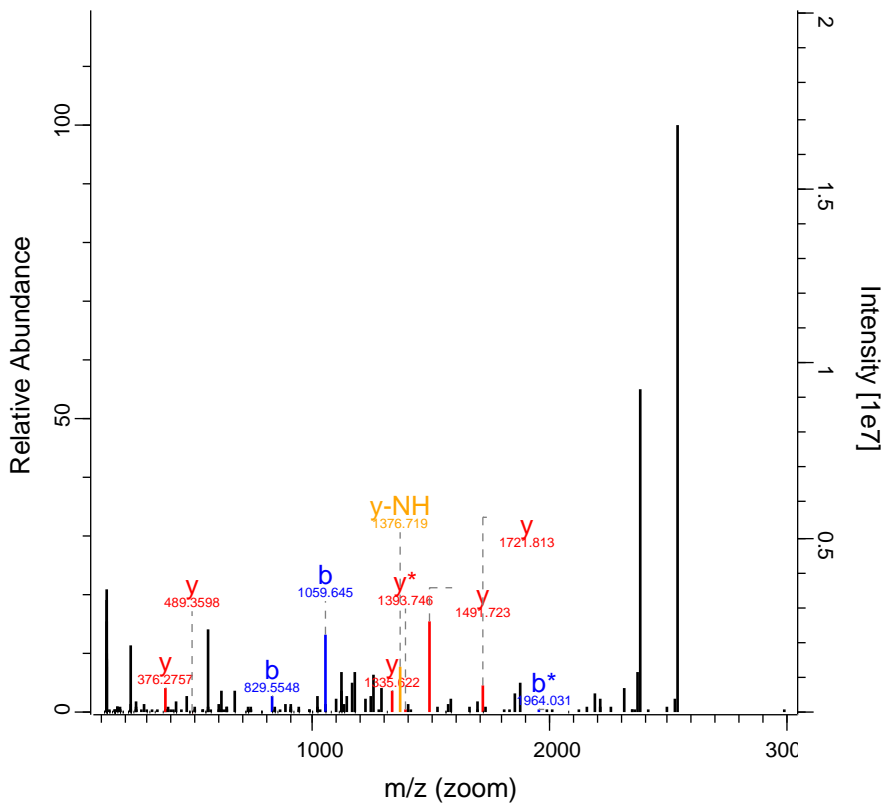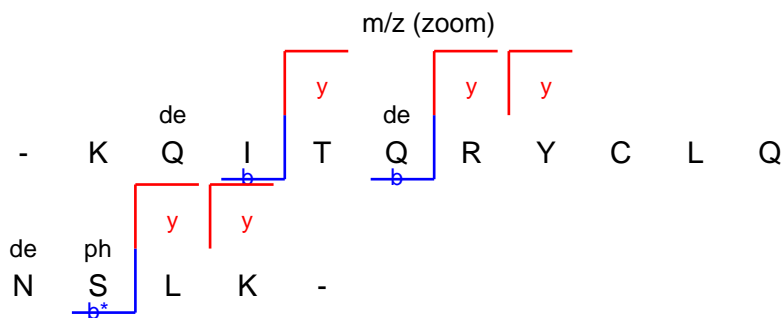

RO-QC-160121\_ZackD\_SS\_Set\_01\_Fraction 18643 FTMS; HC 63.28 476.29 SYS1

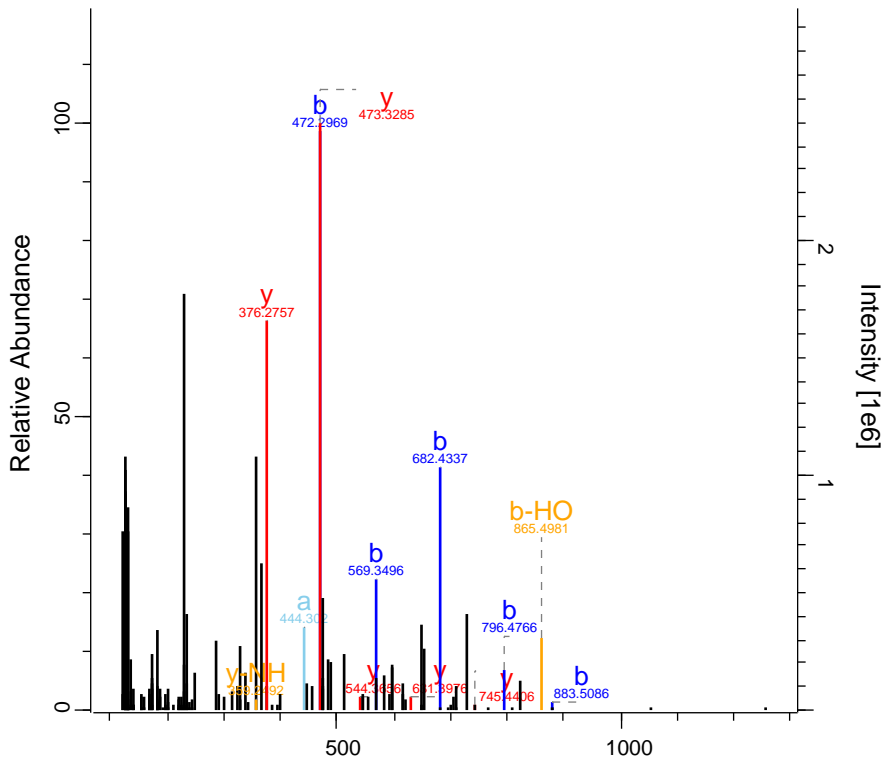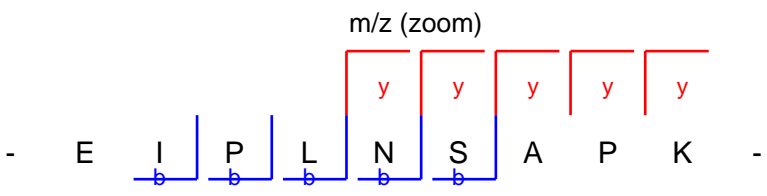



RO-QC-160121\_ZackD\_SS\_Set\_01\_Fractio 18662 FTMS; HC 102.98 804.72 TTF1

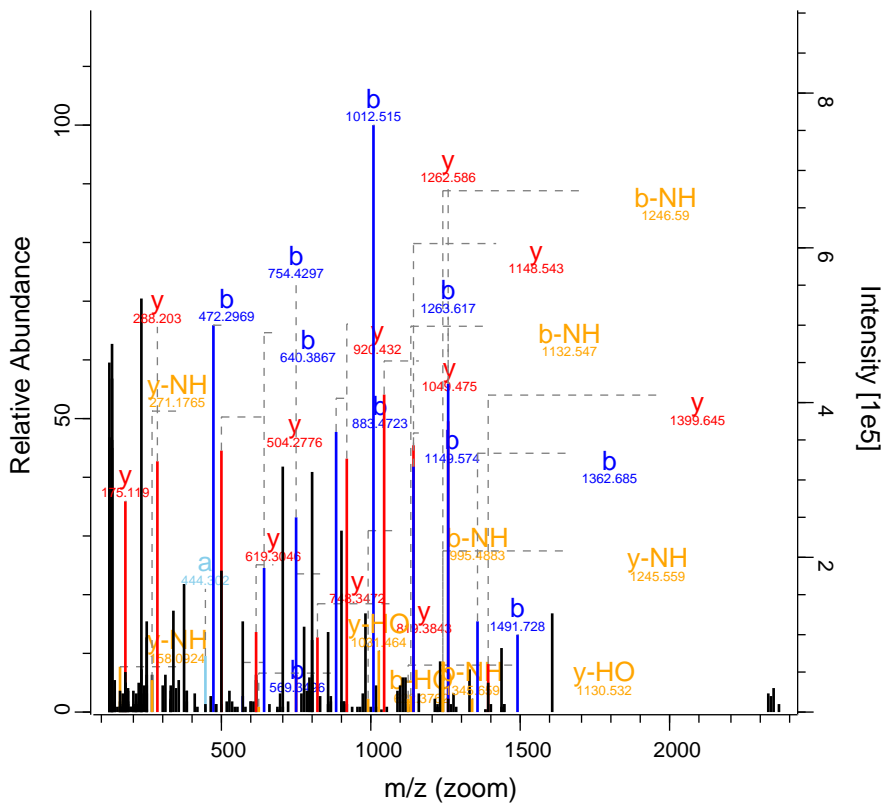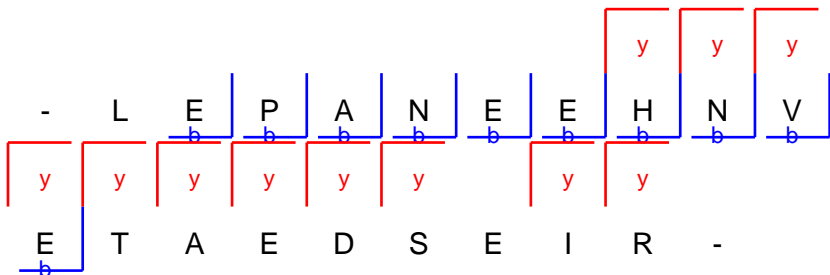

RO-QC-160121\_ZackD\_SS\_Set\_01\_Fractio 19879 FTMS; HC 194.54 933.03 TMEM208

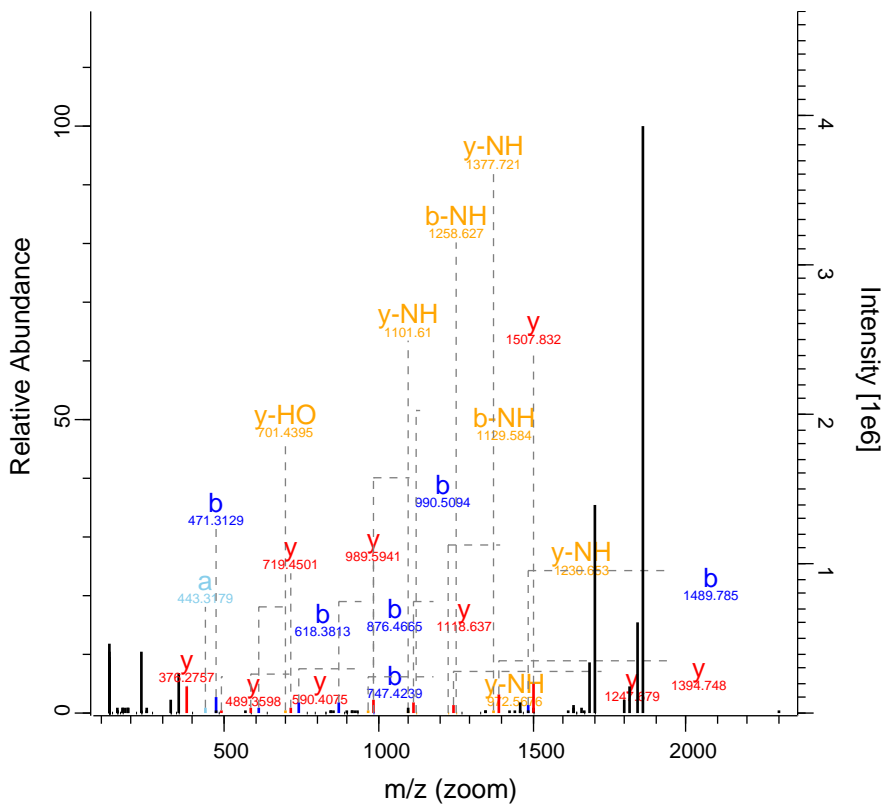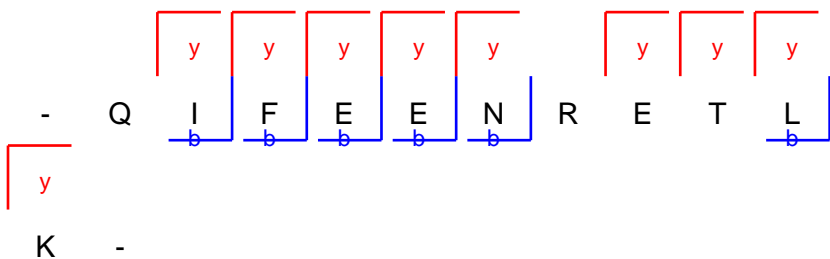

RO-QC-160121\_ZackD\_SS\_Set\_01\_Fractio 19916 FTMS; HC 316.83 864.96 CBY1

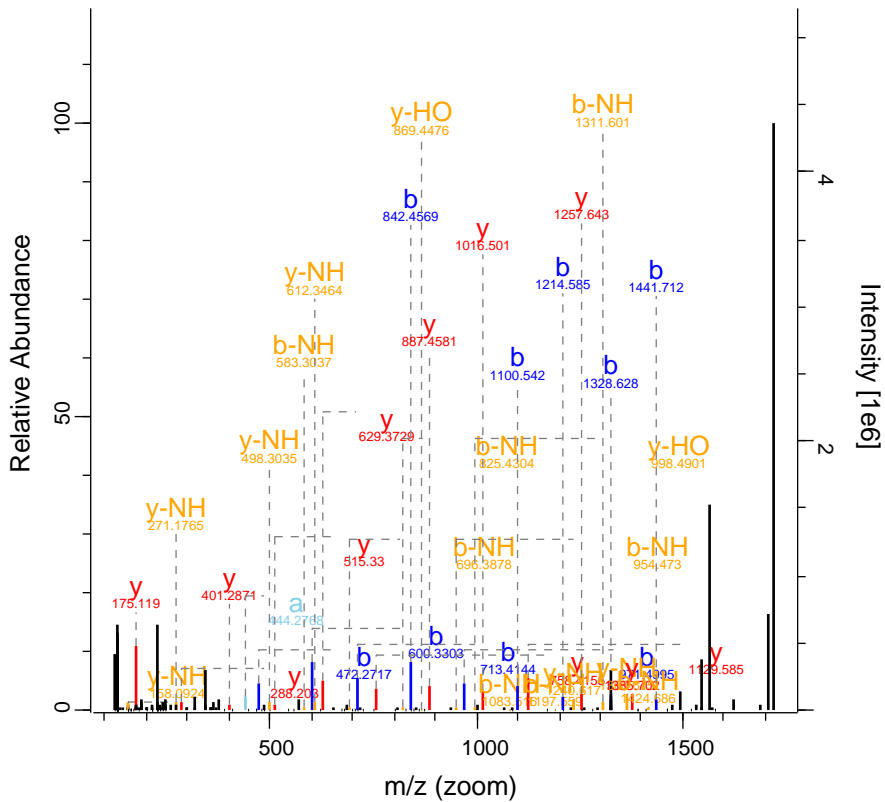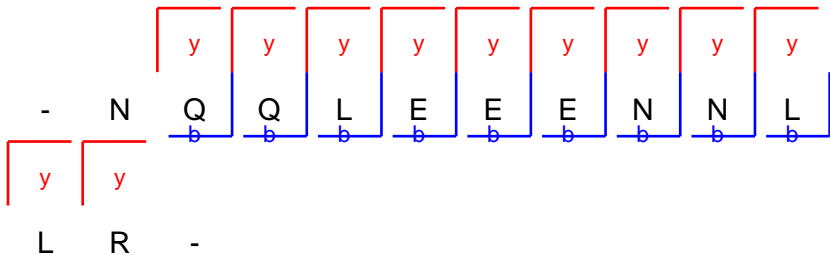

RO-QC-160121\_ZackD\_SS\_Set\_01\_Fractio 19952 FTMS; HC 108.47 909.91 ANAPC11

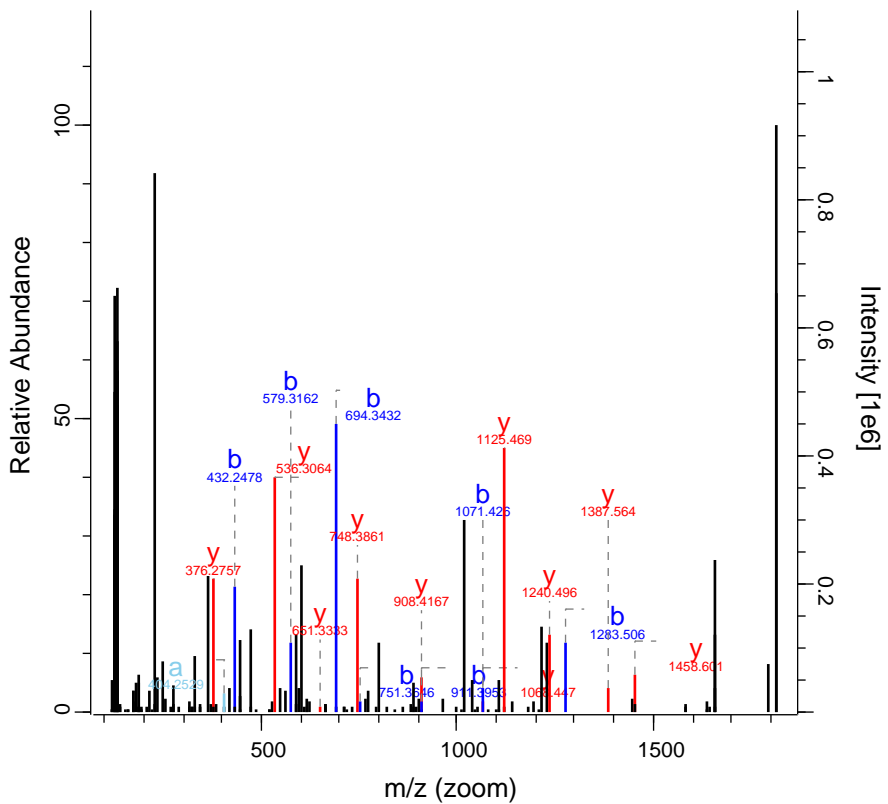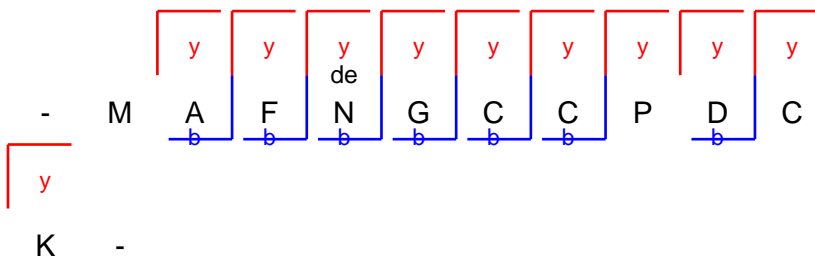

RO-QC-160121\_ZackD\_SS\_Set\_01\_Fraction 19964 FTMS; HC 52.52 600.07 ATP6V0C

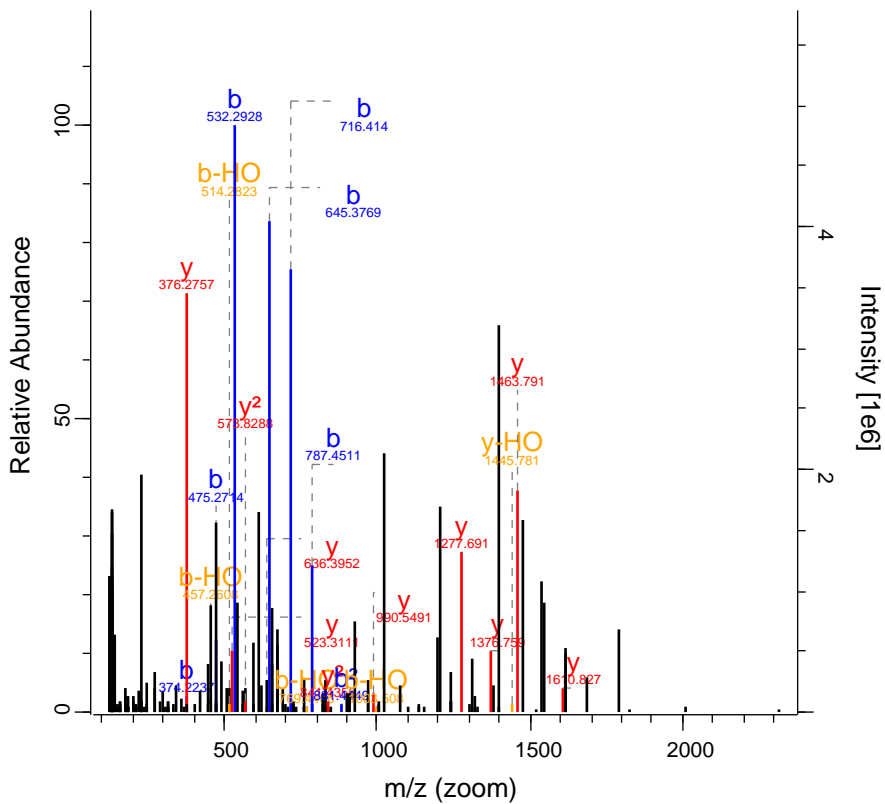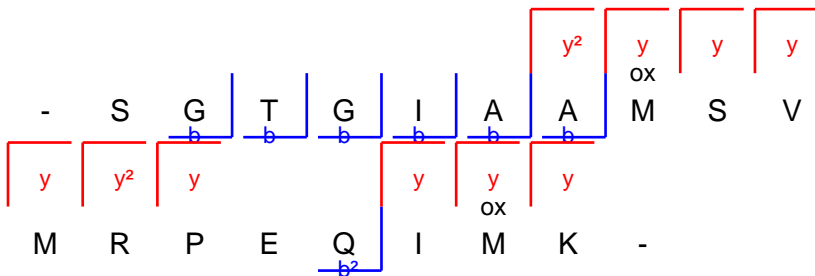

RO-QC-160121\_ZackD\_SS\_Set\_01\_Fraction 20336 FTMS; HC 47.22 799.76 ATP6V0C

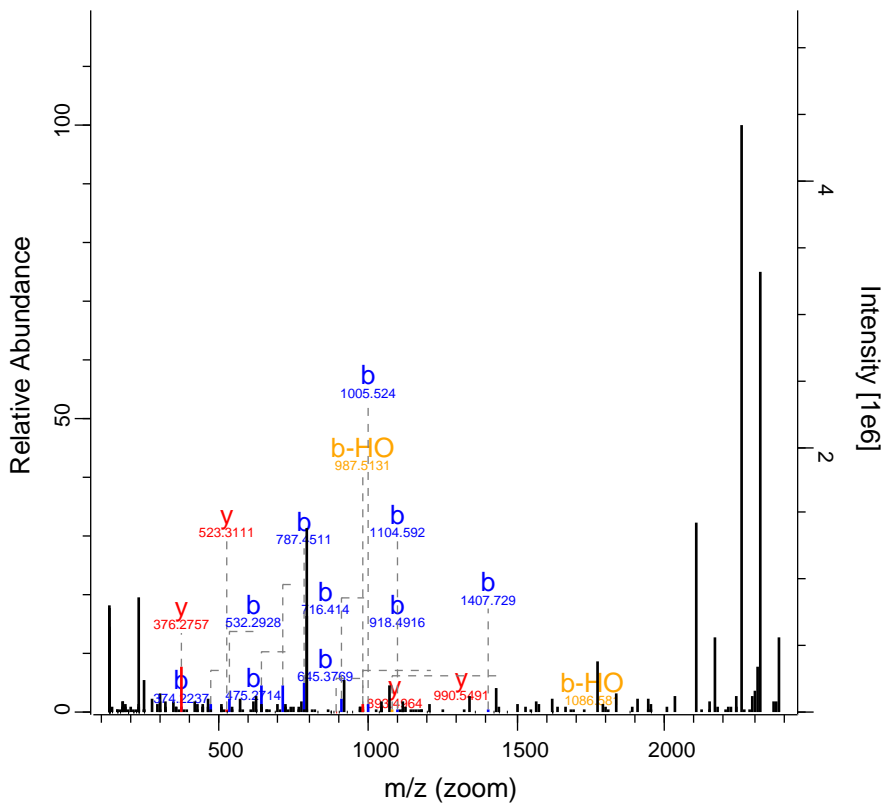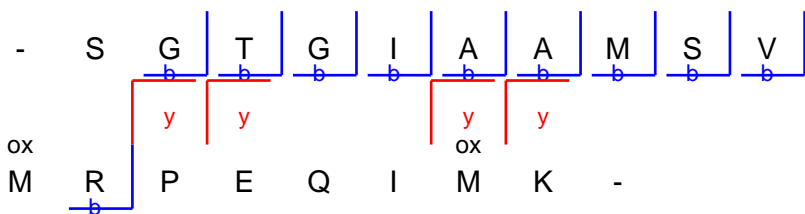

RO-QC-160121\_ZackD\_SS\_Set\_01\_Fraction 20620 FTMS; HC 67.56 810.96 FSD2

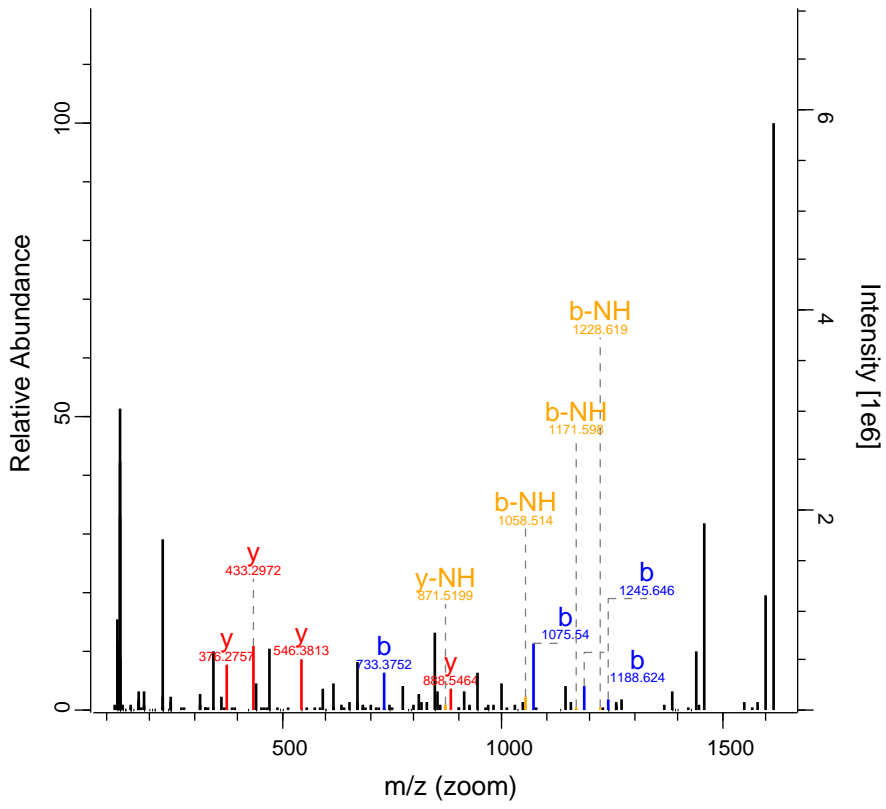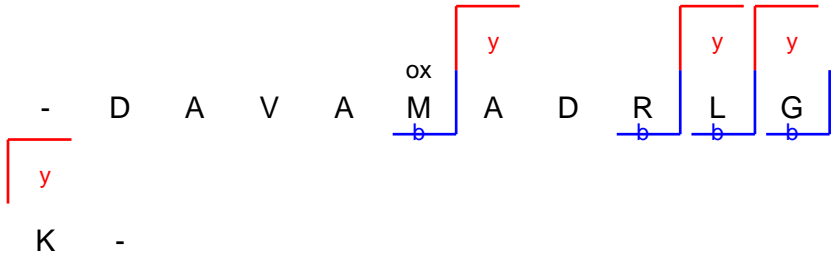

RO-QC-160121\_ZackD\_SS\_Set\_01\_Fraction 20676 FTMS; HCl 99.22 930.5 PMS2P11

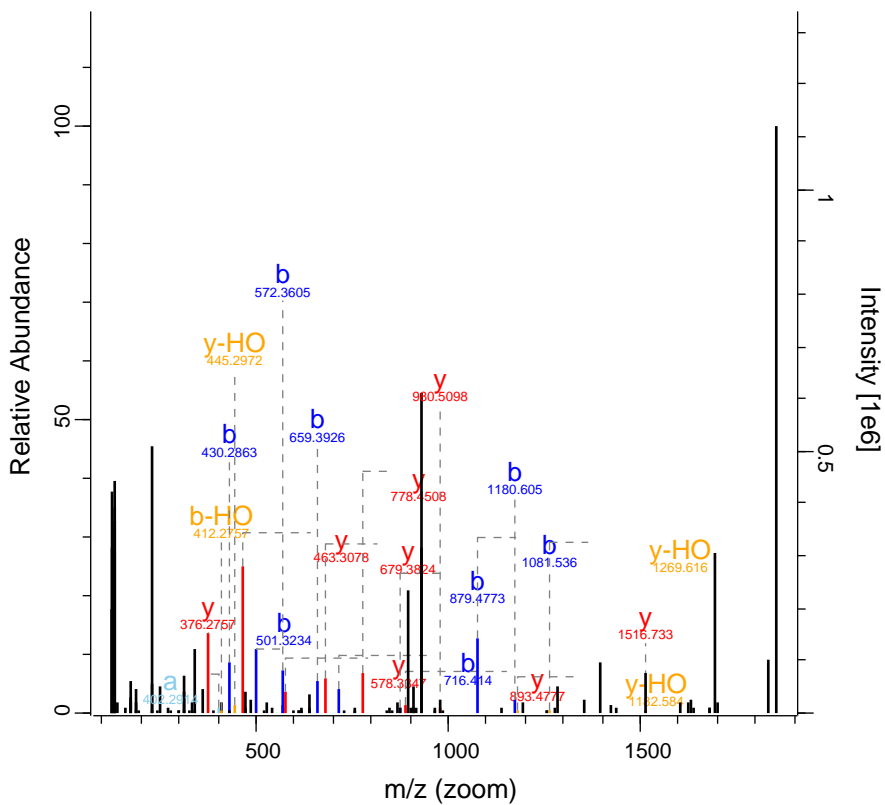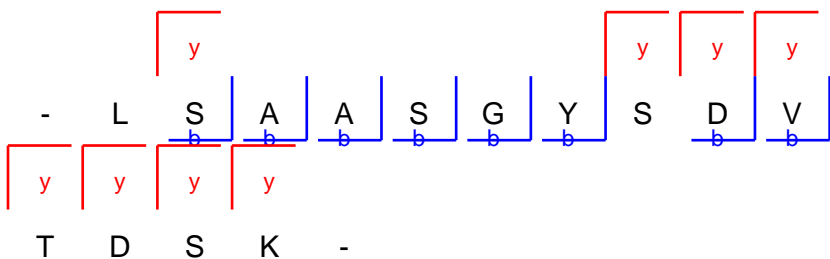



RO-QC-160121\_ZackD\_SS\_Set\_01\_Fraction 21501 FTMS; HC 170.91 951.53 AURKA

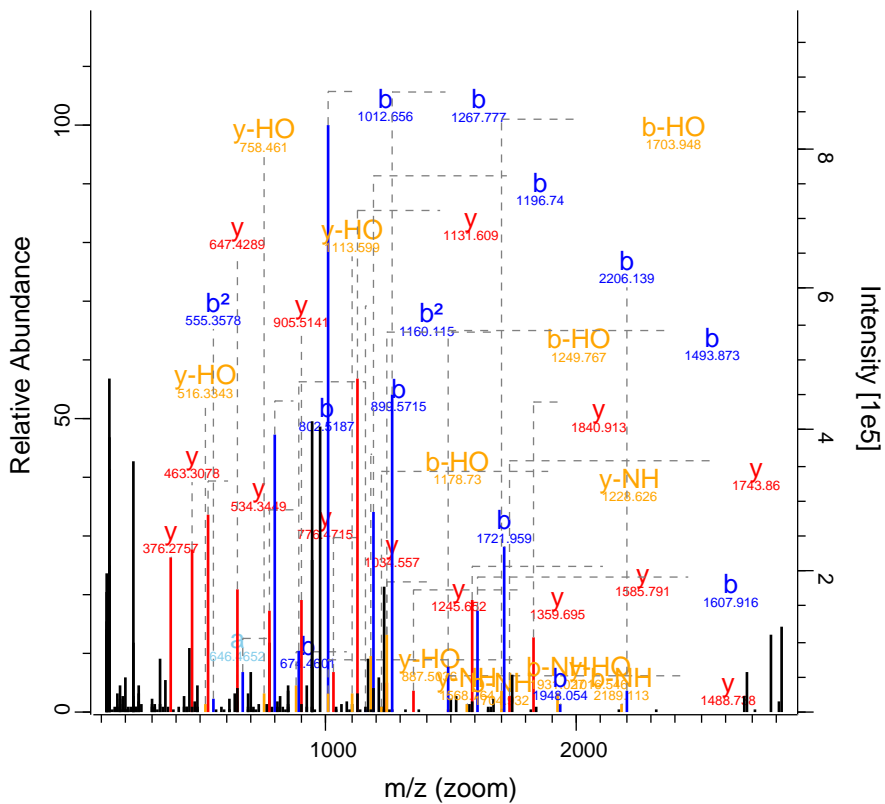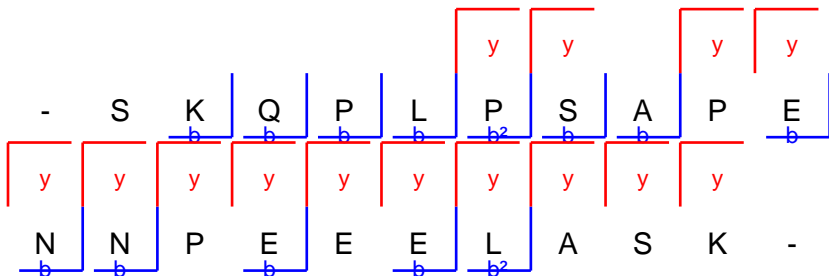

RO-QC-160121\_ZackD\_SS\_Set\_01\_Fraction21535 FTMS; HC 74.46 594.01 ORAI3

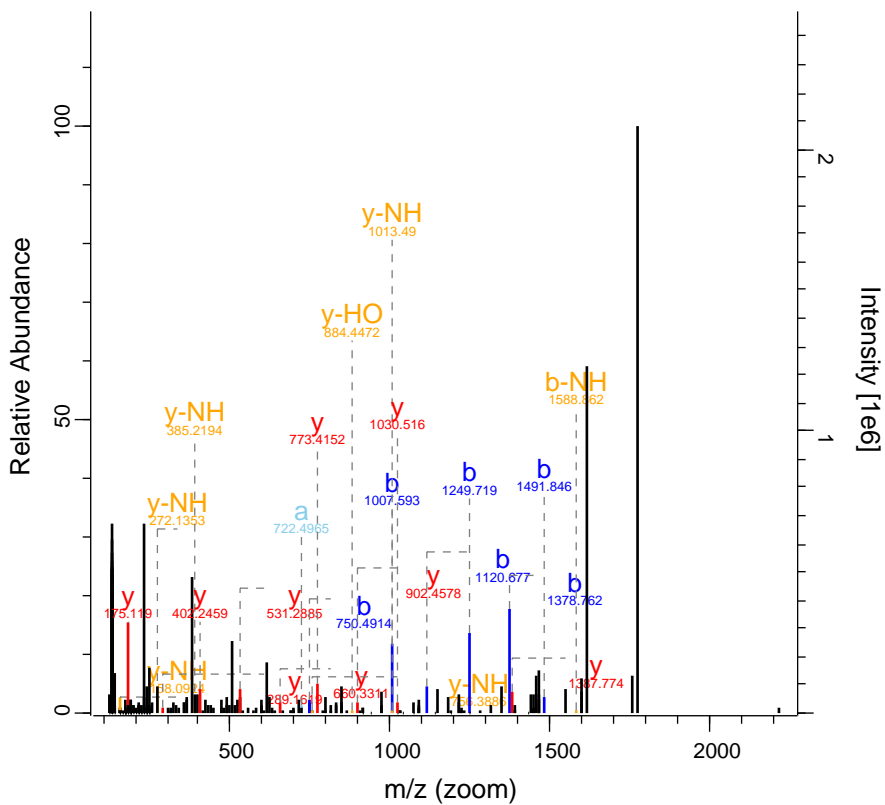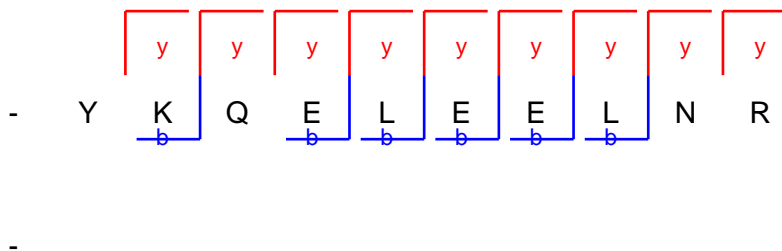

RO-QC-160121\_ZackD\_SS\_Set\_01\_Fraction21655 FTMS; HC 50.28 942.49 DYRK4

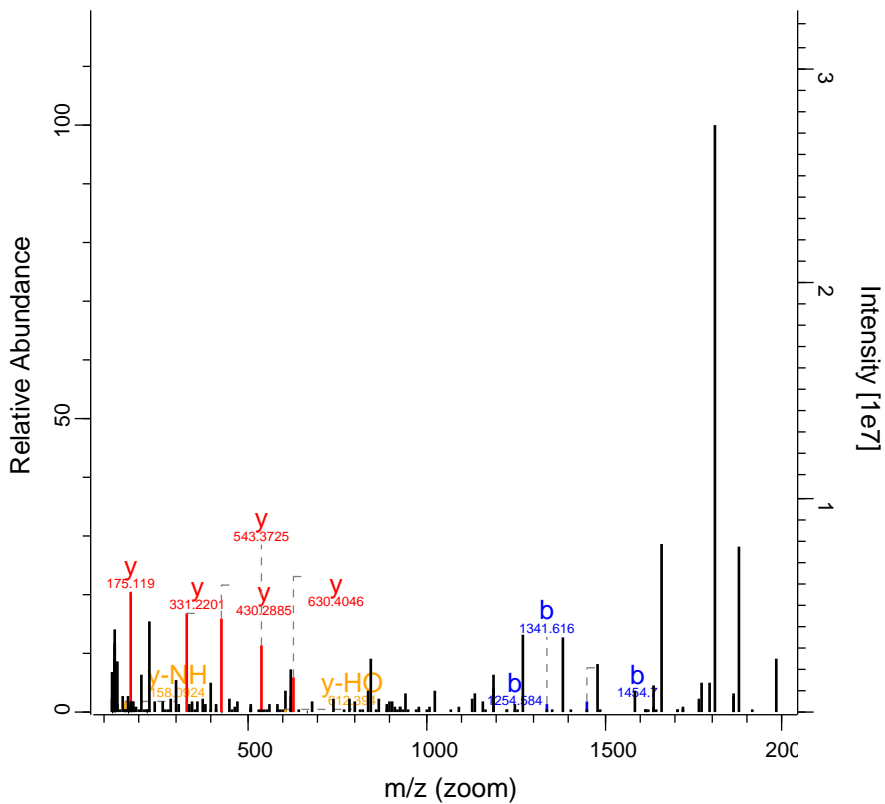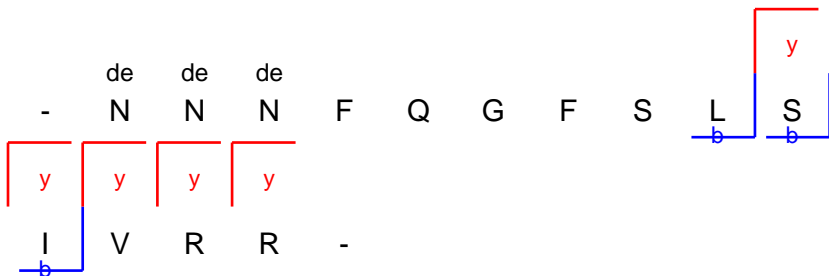

RO-QC-160121\_ZackD\_SS\_Set\_01\_Fraction 21705 FTMS; HC 40.5 521.53 PRSS55

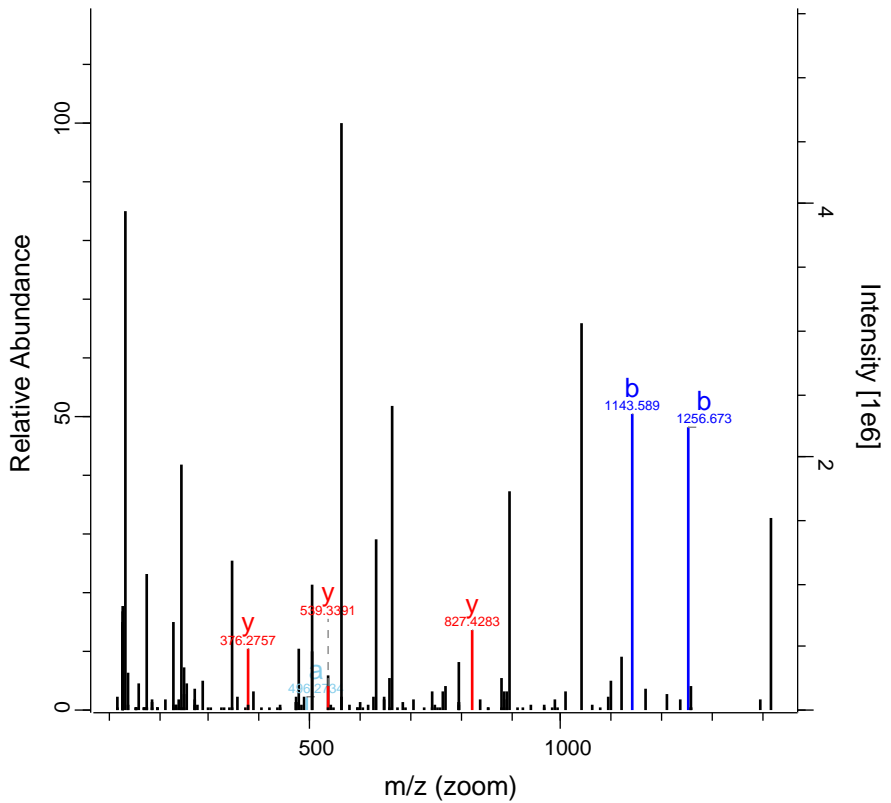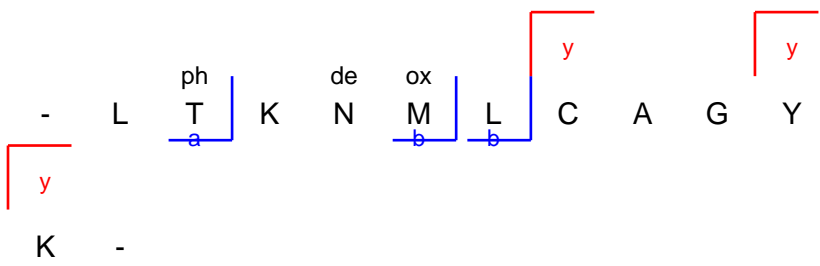

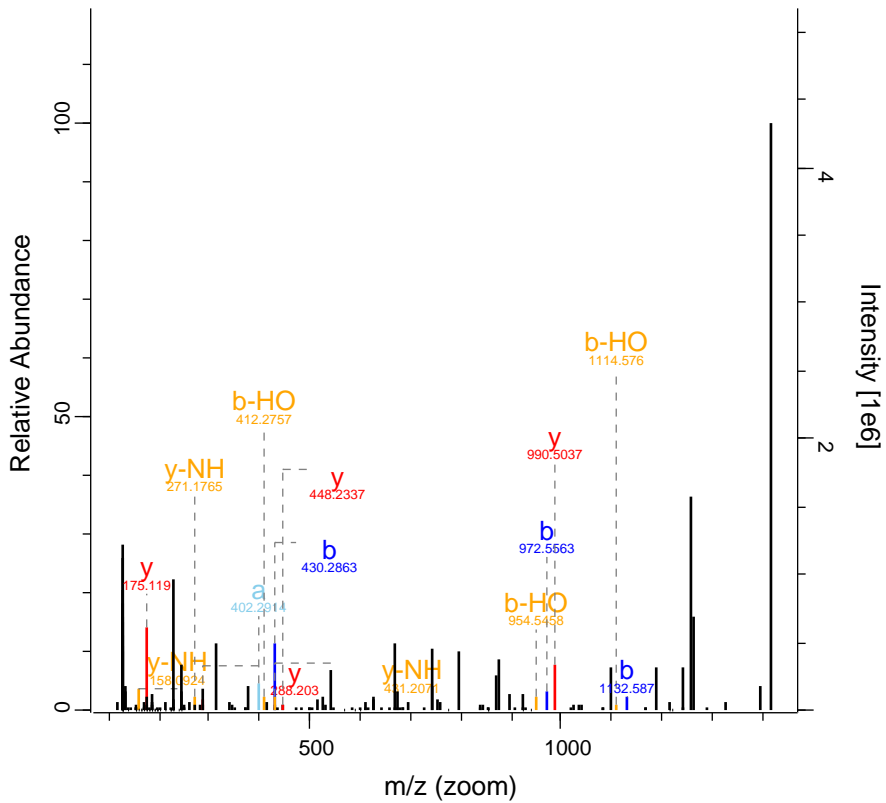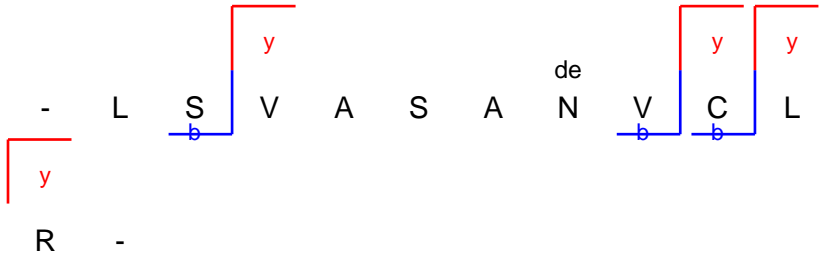

R -

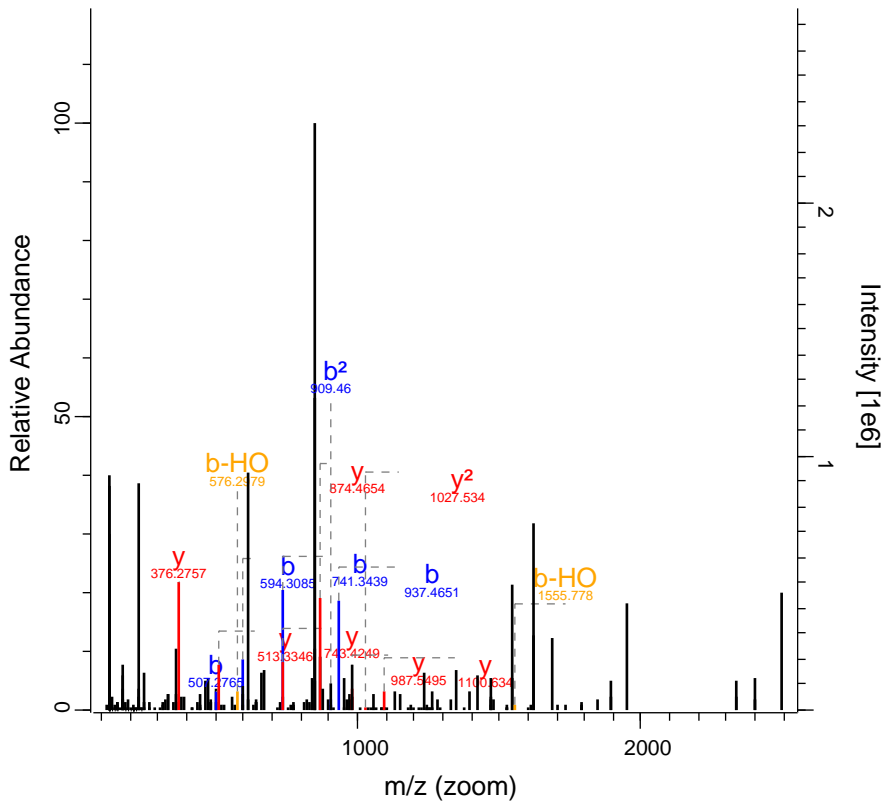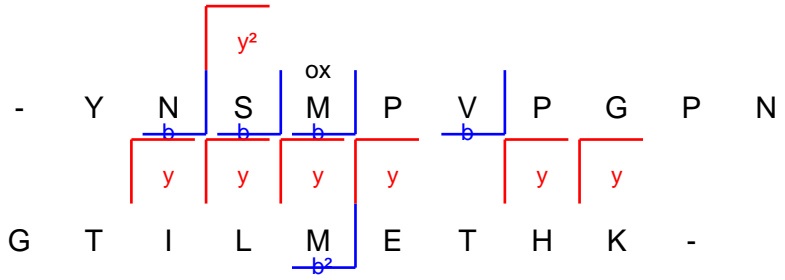

| Raw File                                | Scan  | Method    | Score | m/z    |
|-----------------------------------------|-------|-----------|-------|--------|
| RO-QC-160121_ZackD_SS_Set_01_Fraction_4 | 23260 | FTMS; HCD | 84.48 | 470.95 |

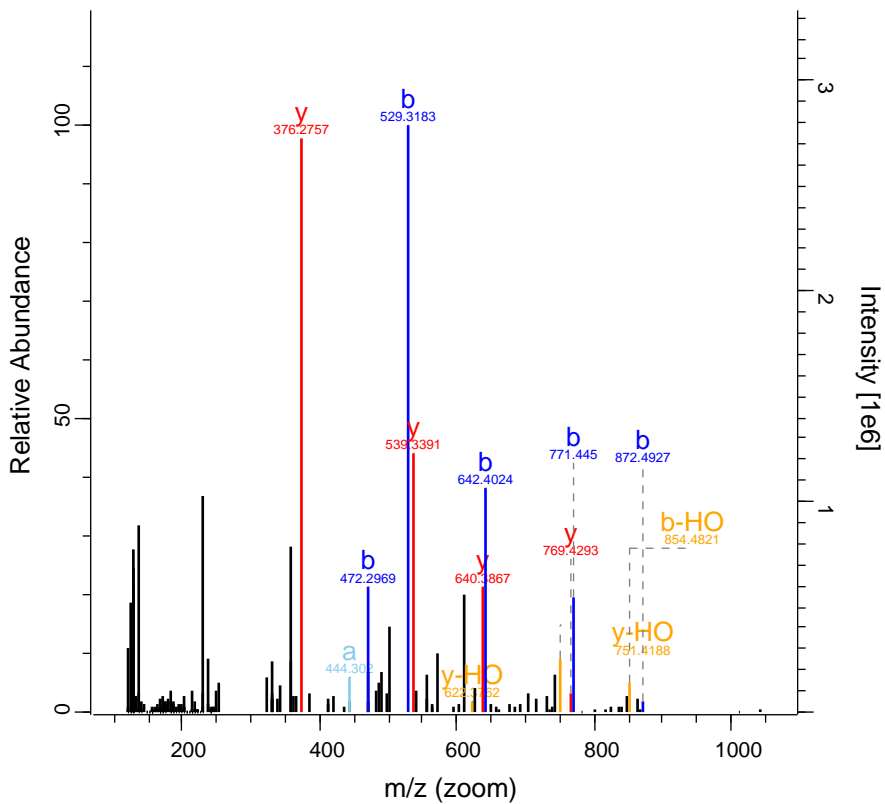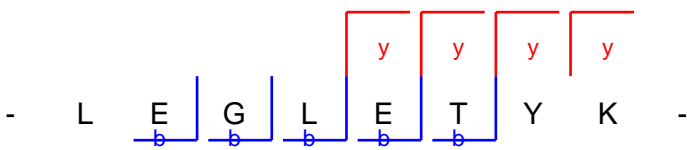

RO-QC-160121\_ZackD\_SS\_Set\_01\_Fraction 23281 FTMS; HC 68.18 692.71 CEP78

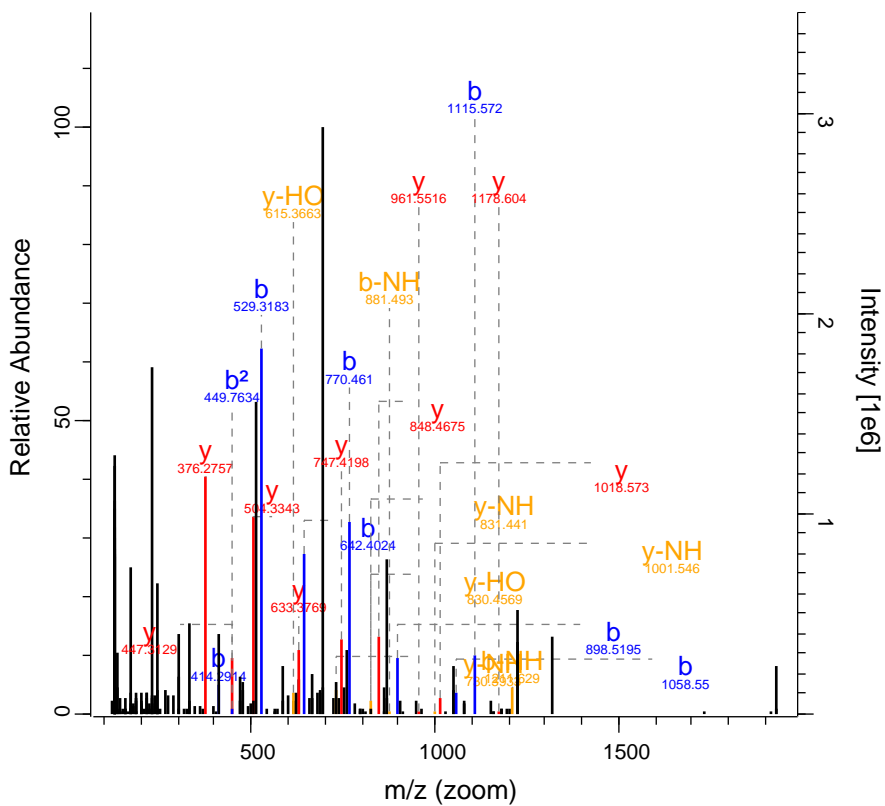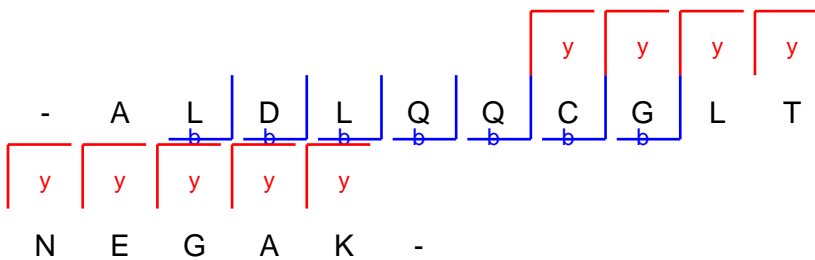



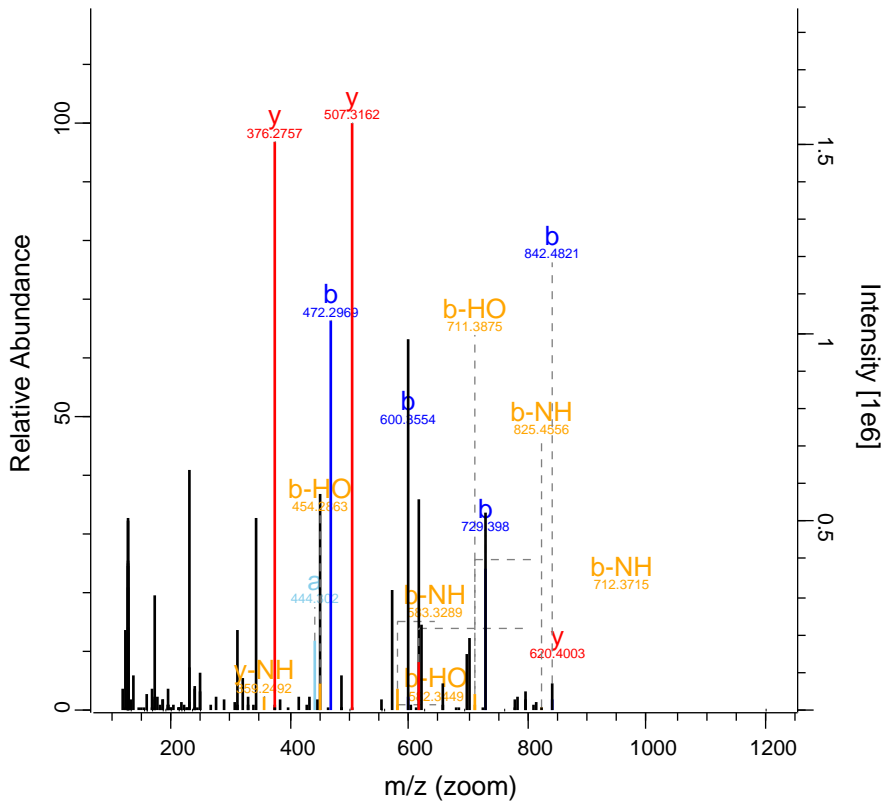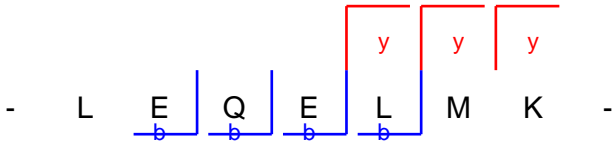

RO-QC-160121\_ZackD\_SS\_Set\_01\_Fraction 24037 FTMS; HC 60.48 473.62 CD14

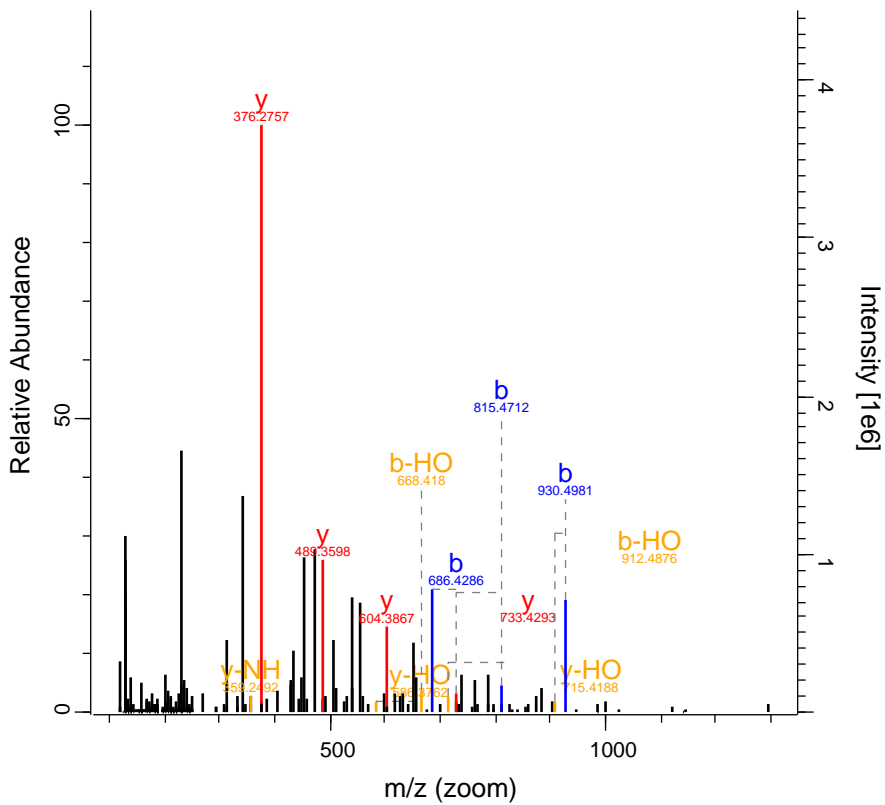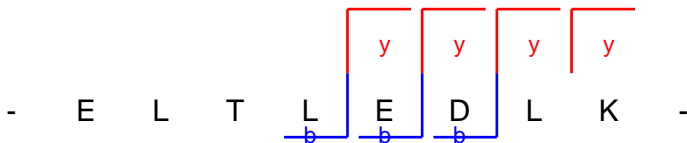

| Raw File                                | Scan  | Method    | Score | m/z    |
|-----------------------------------------|-------|-----------|-------|--------|
| RO-QC-160121_ZackD_SS_Set_01_Fraction_4 | 24063 | FTMS; HCD | 57.1  | 618.36 |

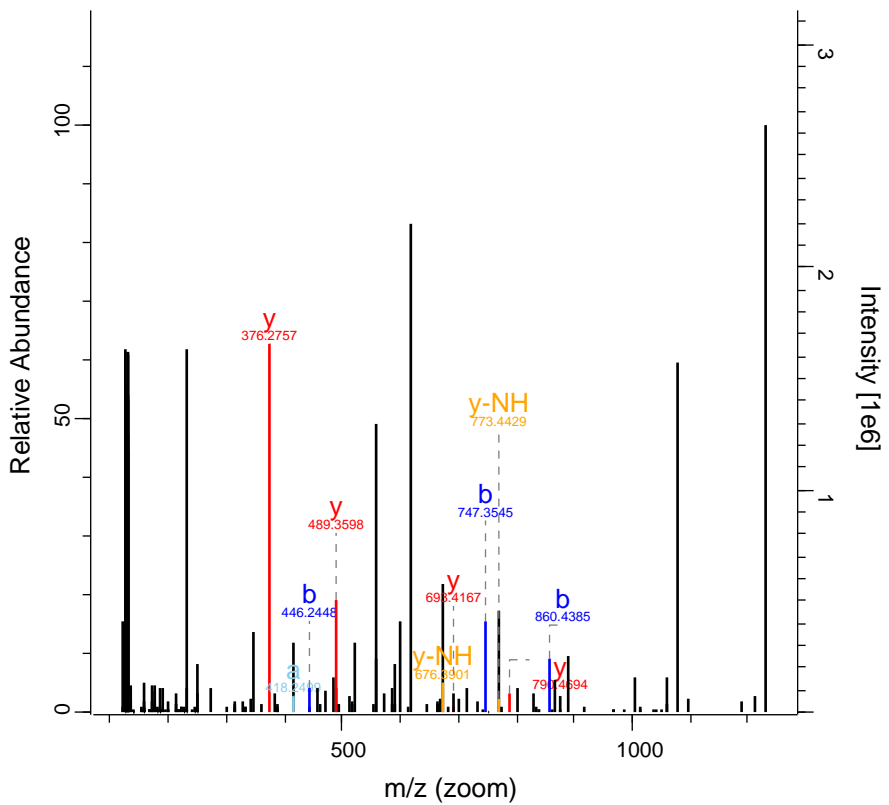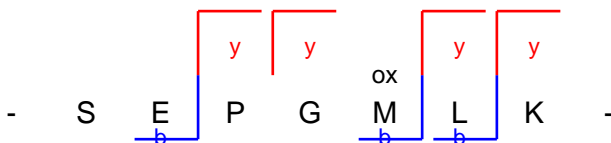

RO-QC-160121\_ZackD\_SS\_Set\_01\_Fraction 24254 FTMS; HC 77.92 473.62 CD14

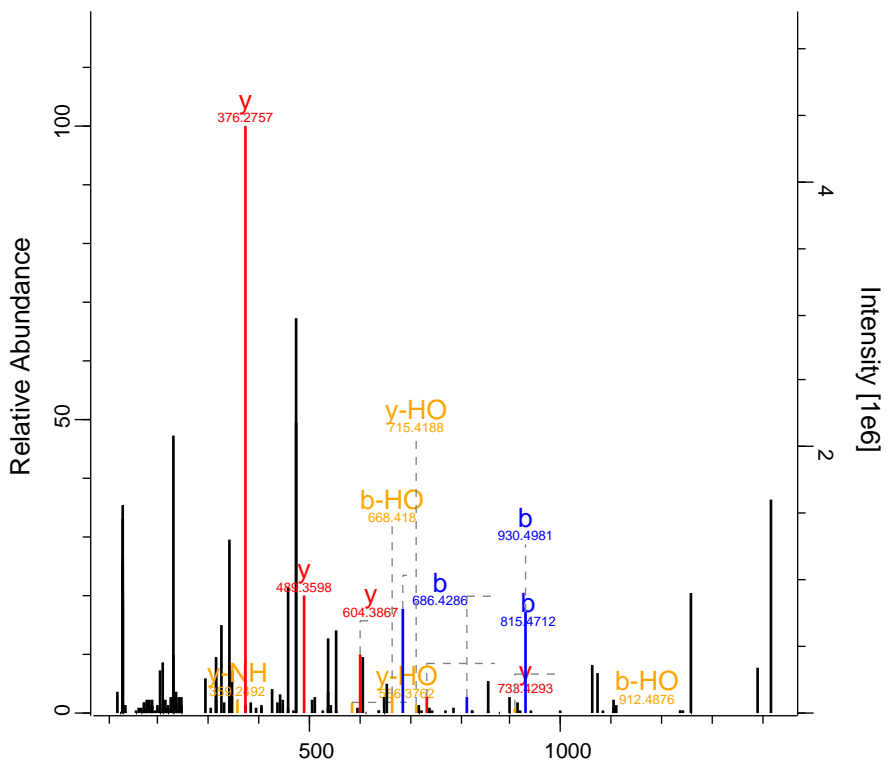

m/z (zoom)

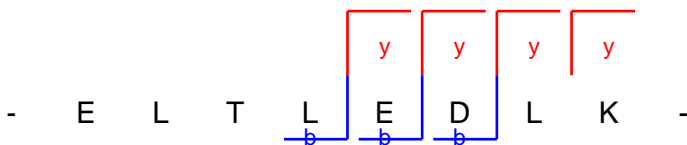

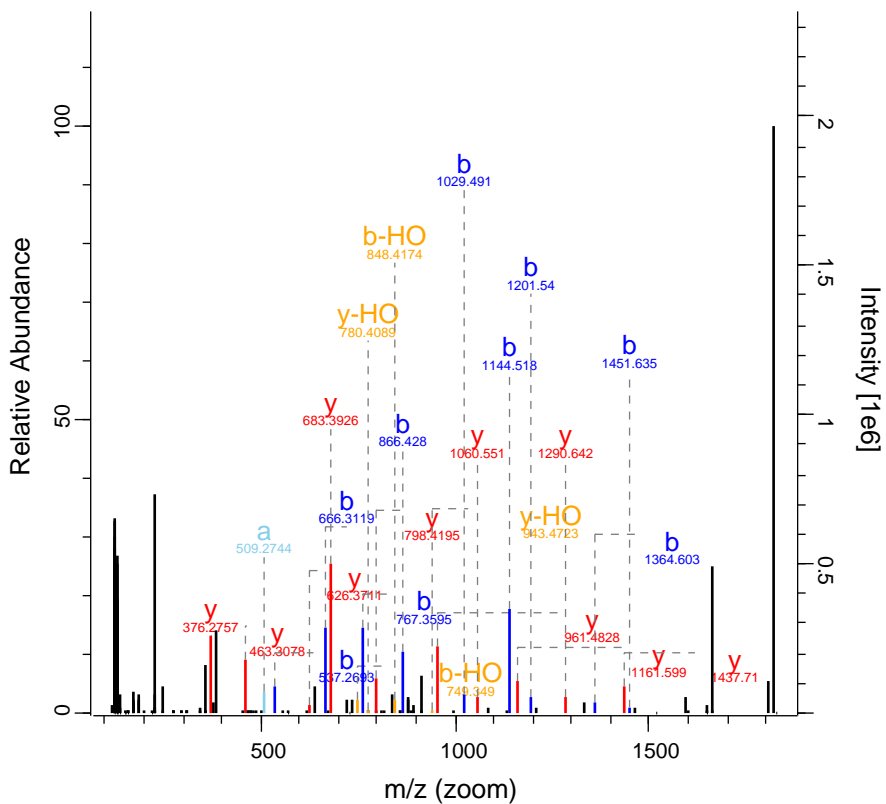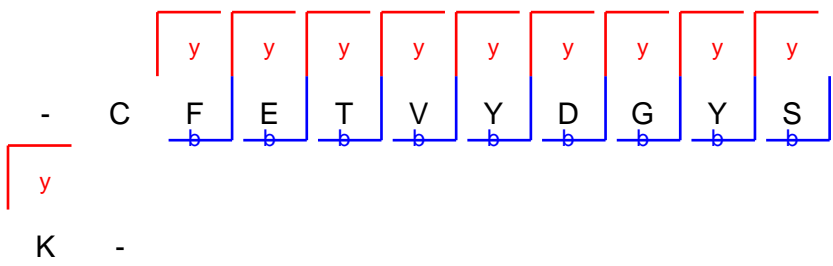

RO-QC-160121\_ZackD\_SS\_Set\_01\_Fractio 24894 FTMS; HC 130.56 551.97 MMP23A

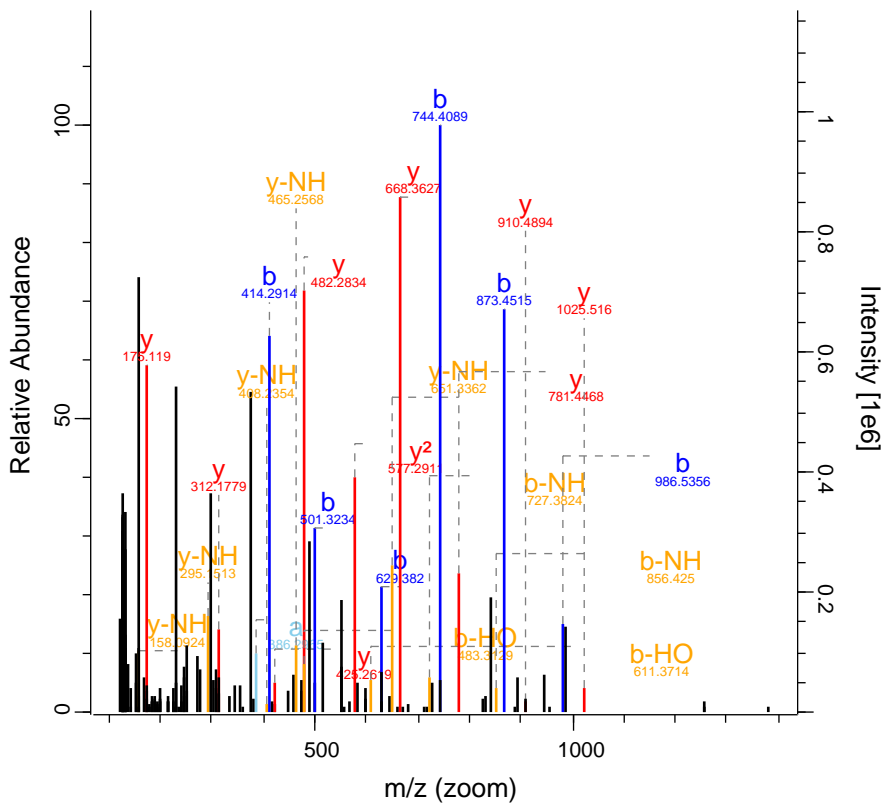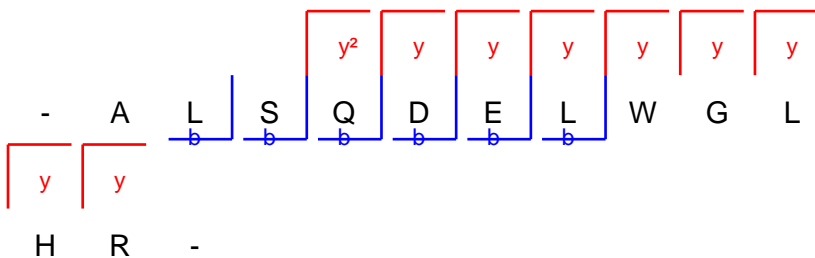

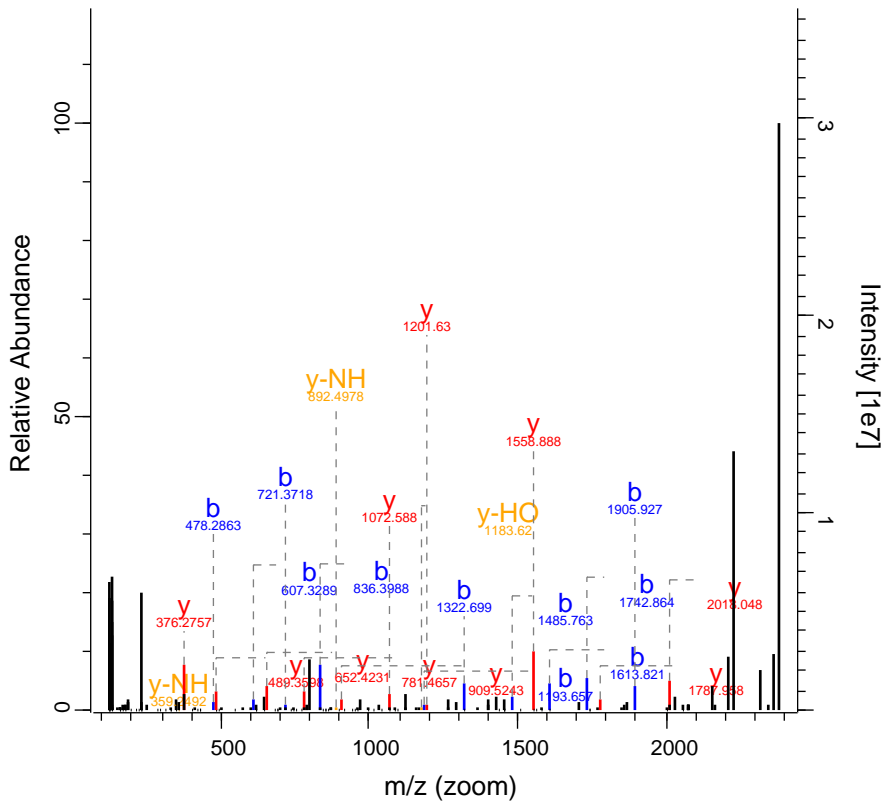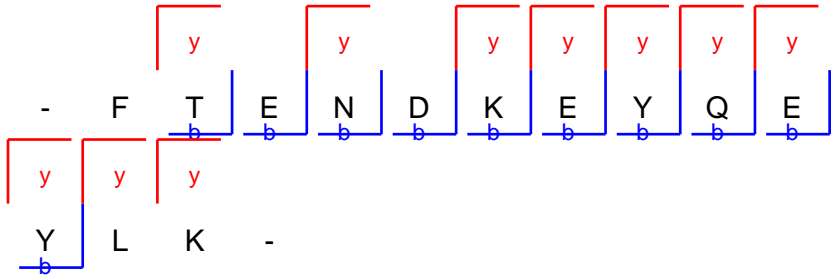

RO-QC-160121\_ZackD\_SS\_Set\_01\_Fraction 26465 FTMS; HC 77.9 847.08 CNIH4

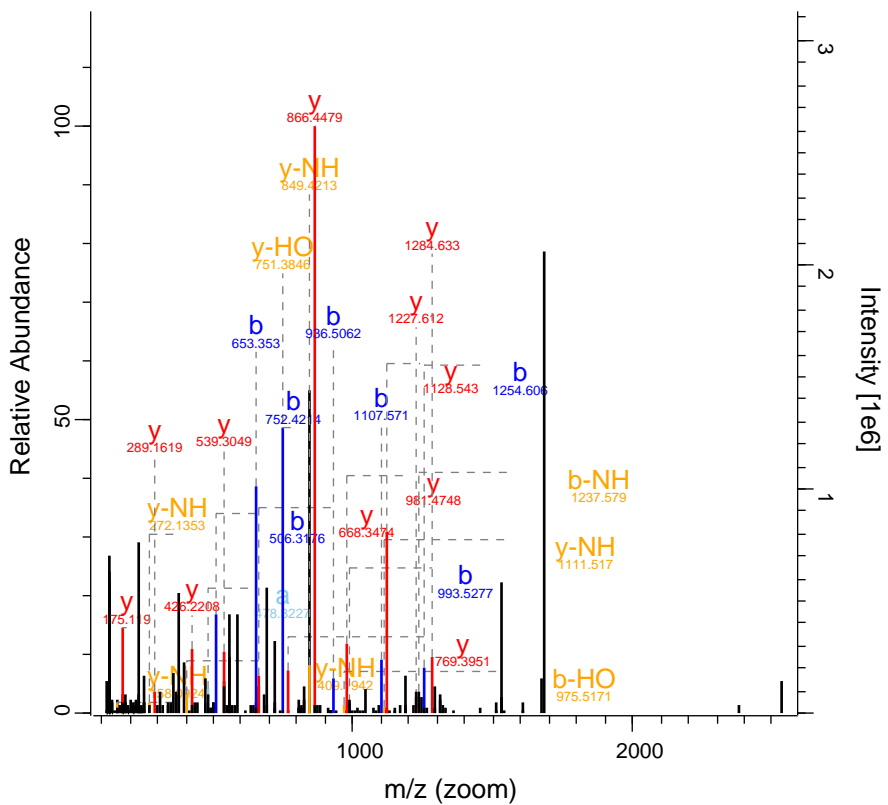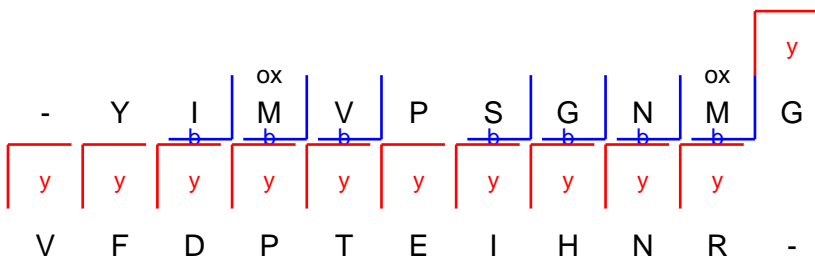



RO-QC-160121\_ZackD\_SS\_Set\_01\_Fraction 26595 FTMS; HC 59.9 635.56 CNIH4

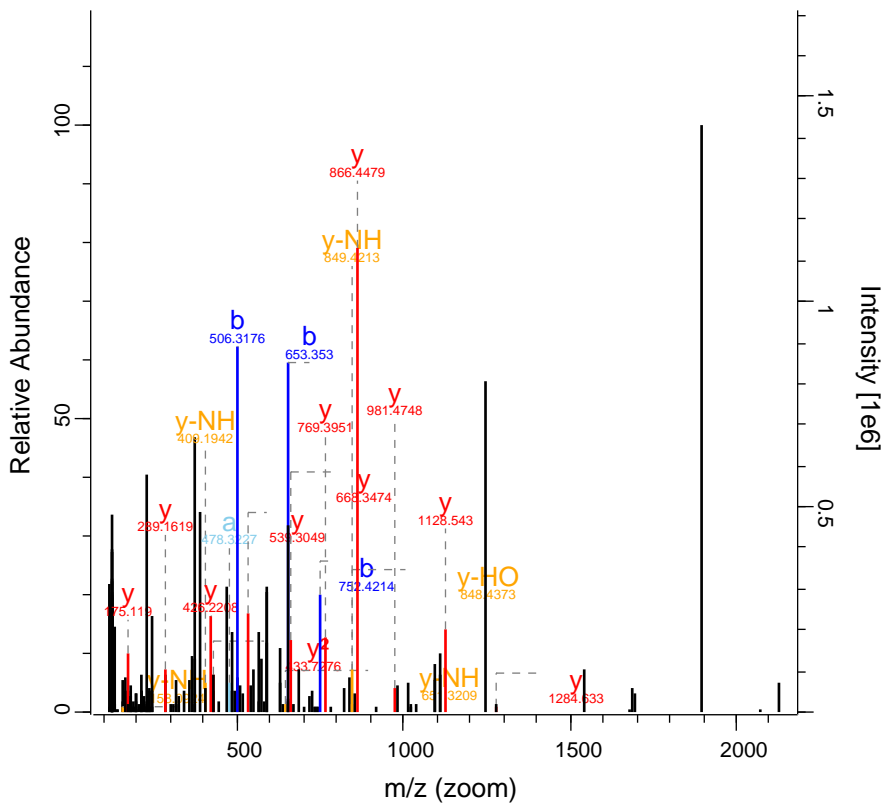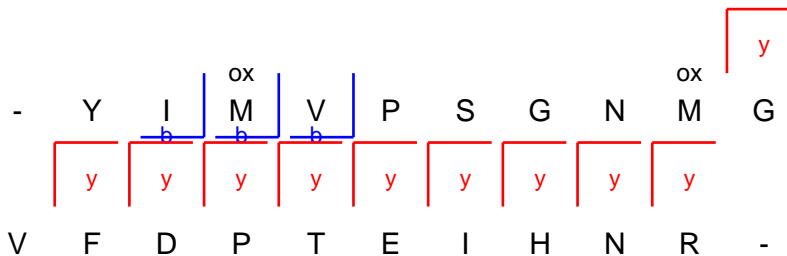

RO-QC-160121\_ZackD\_SS\_Set\_01\_Fractio 26677 FTMS; HC 111.77 847.08 CNIH4

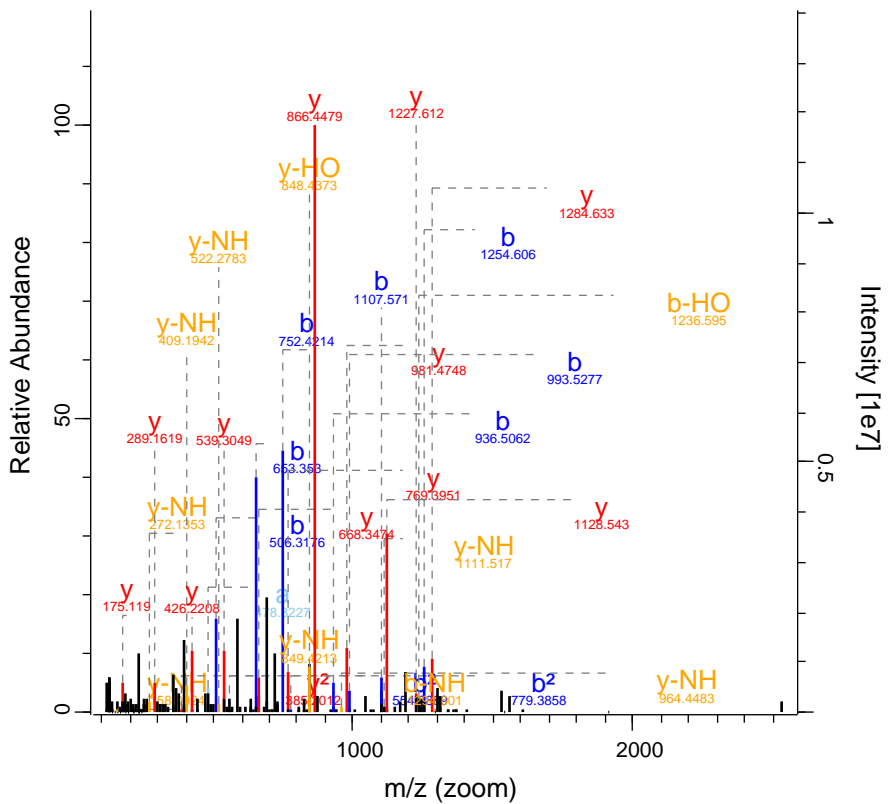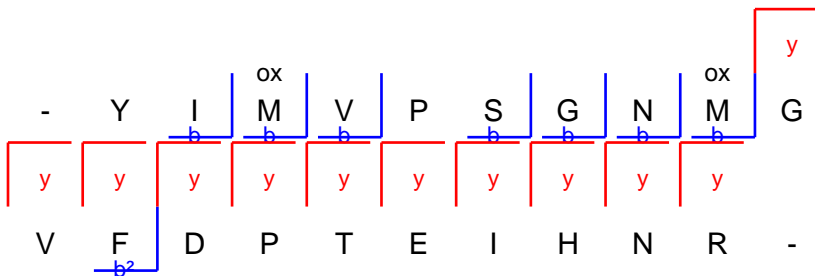

RO-QC-160121\_ZackD\_SS\_Set\_01\_Fraction 27063 FTMS; HC 95.53 634.89 PKP1

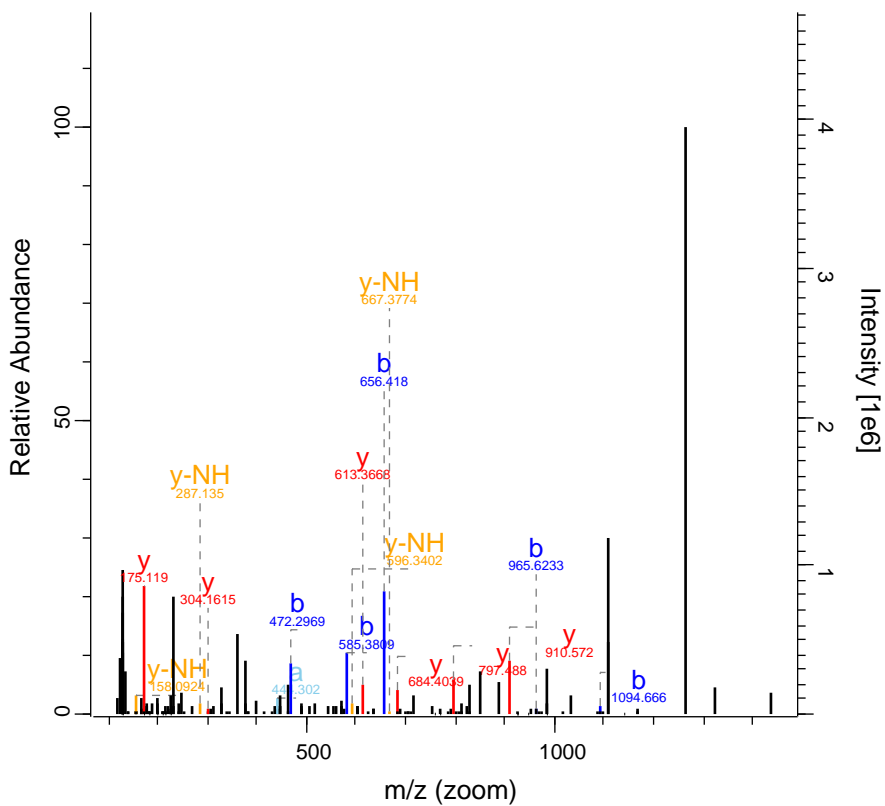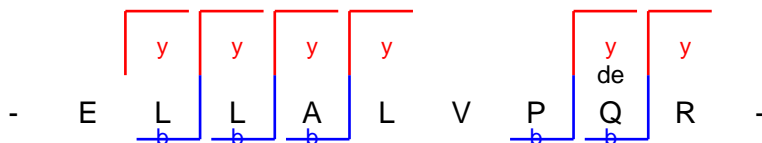

RO-QC-160121\_ZackD\_SS\_Set\_01\_Fractic 27507 FTMS; HC 43.8 1042.25 CASP12

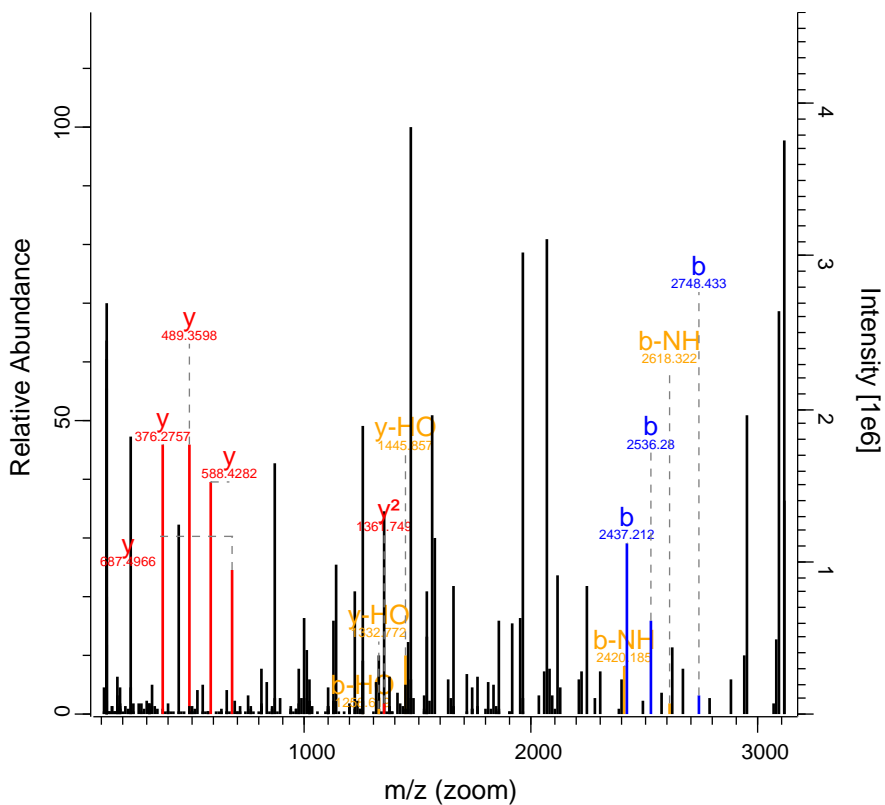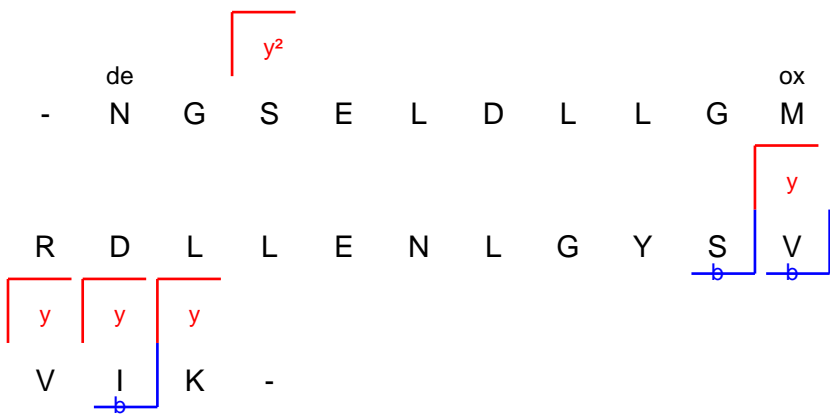

RO-QC-160121\_ZackD\_SS\_Set\_01\_Fractic 27548 FTMS; HC 140.31 1191.62 CDC42SE2

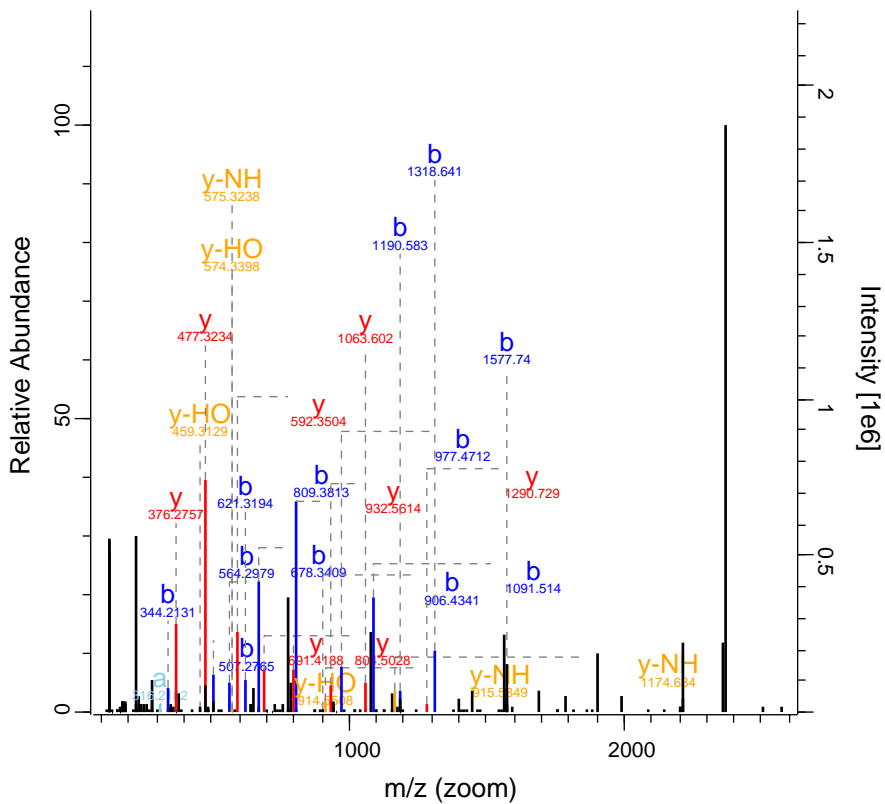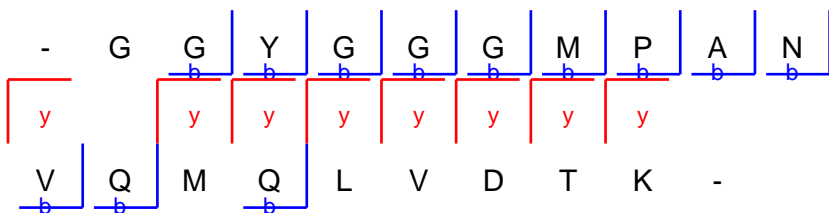

RO-QC-160121\_ZackD\_SS\_Set\_01\_Fractic 27612 FTMS; HC 237.32 1191.12 CDC42SE2

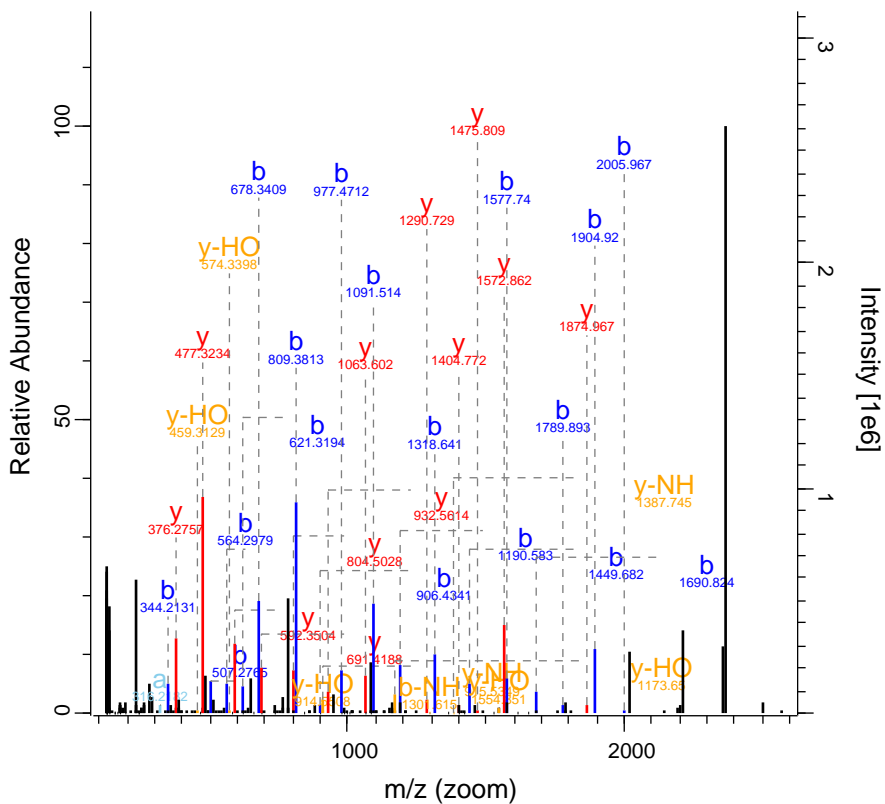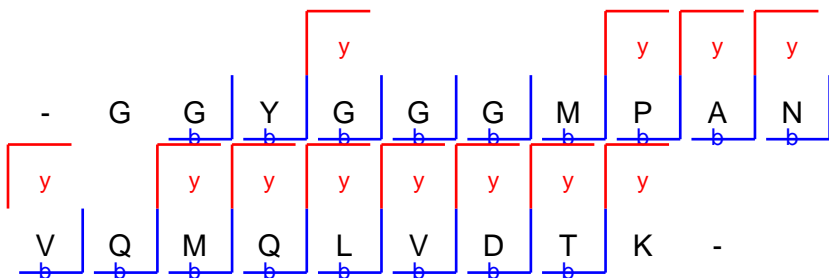

RO-QC-160121\_ZackD\_SS\_Set\_01\_Fraction 27653 FTMS; HC 124.2 794.42 CDC42SE2

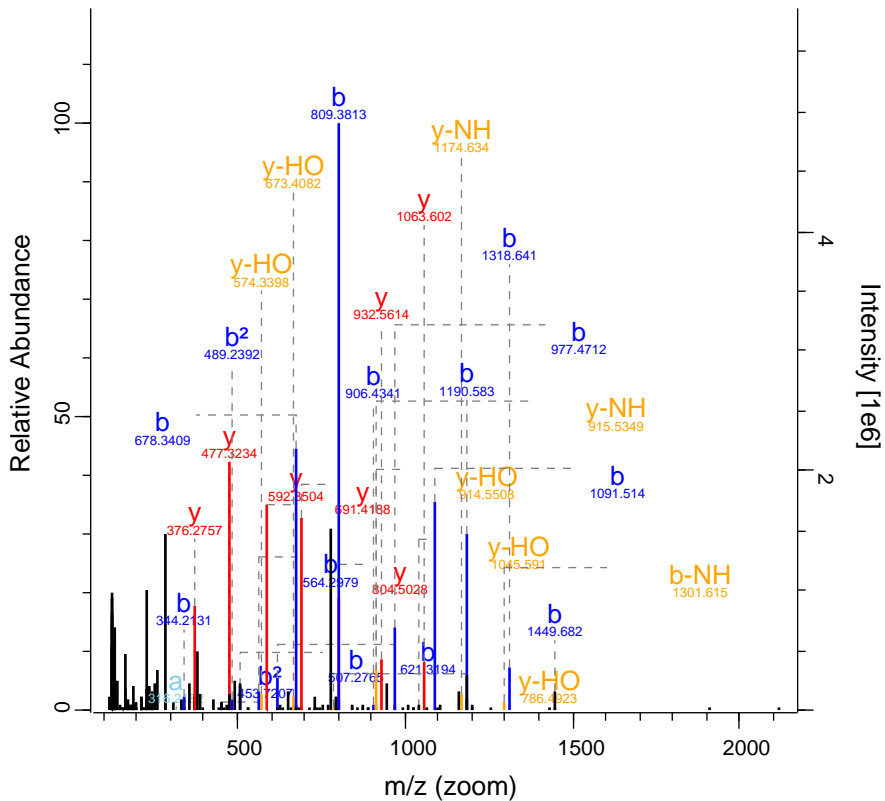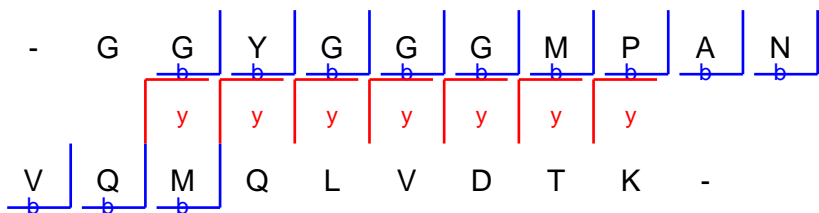

RO-QC-160121\_ZackD\_SS\_Set\_01\_Fraction 27686 FTMS; HC 88.4 849.45 SLC31A1

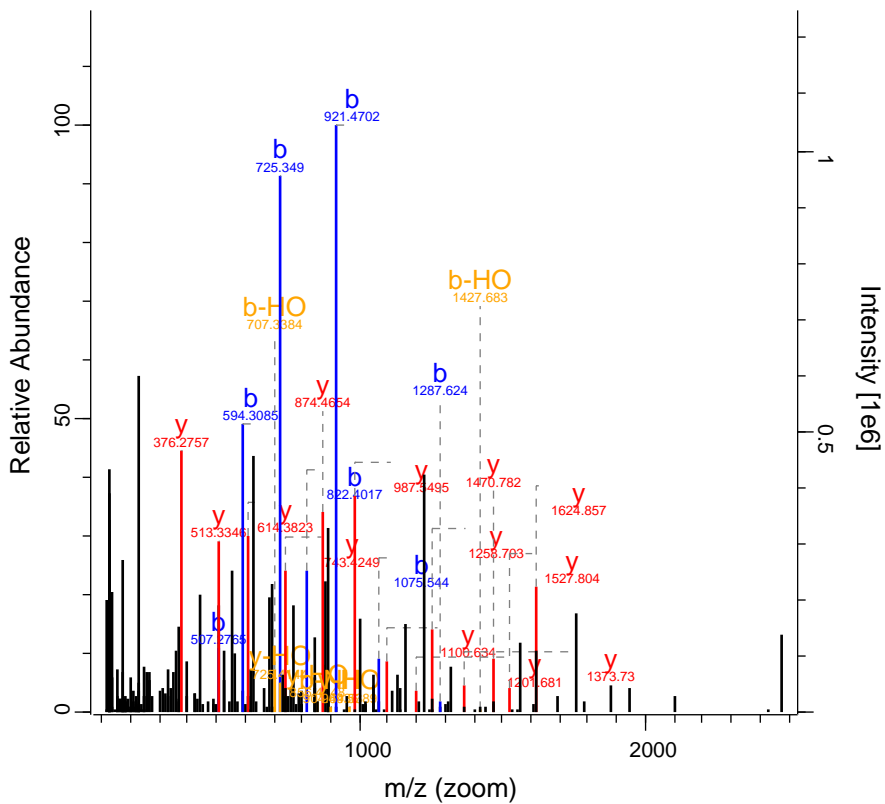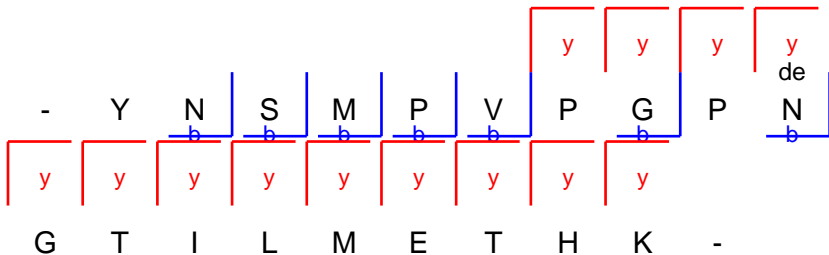



RO-QC-160121\_ZackD\_SS\_Set\_01\_Fractio 27705 FTMS; HC 116.77 797.47 KBTBD8

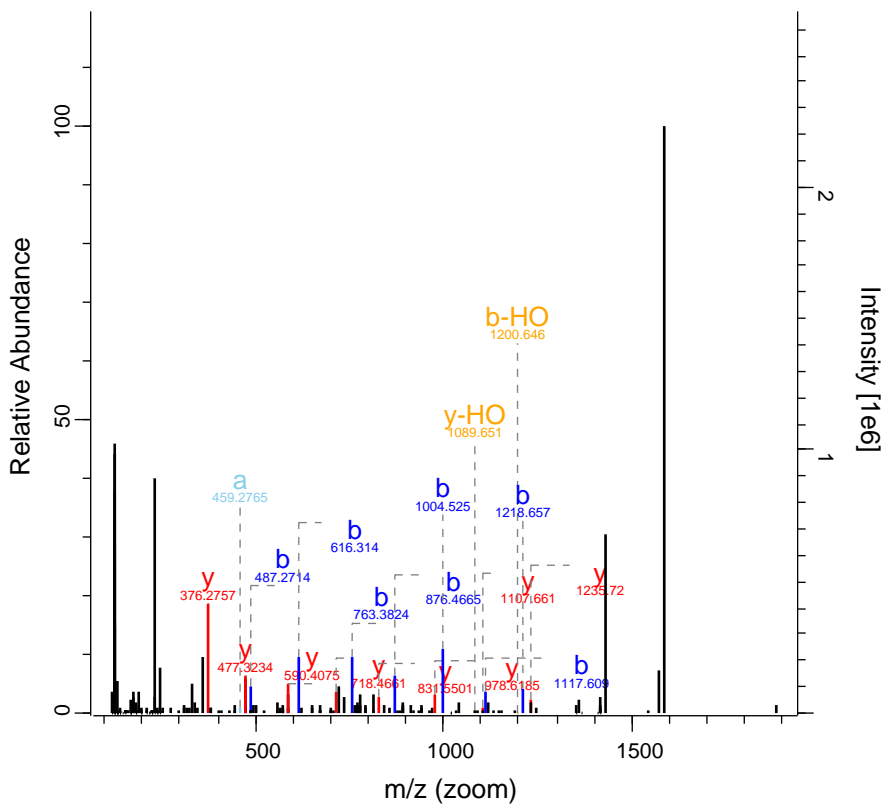

m/z (zoom)

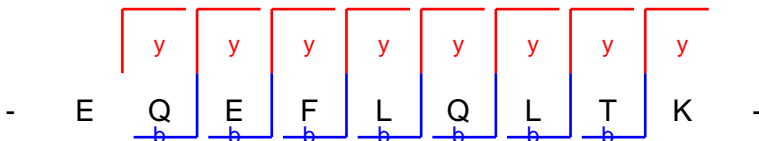

RO-QC-160121\_ZackD\_SS\_Set\_01\_Fractio 27769 FTMS; HC 174.41 666.39 CDNF

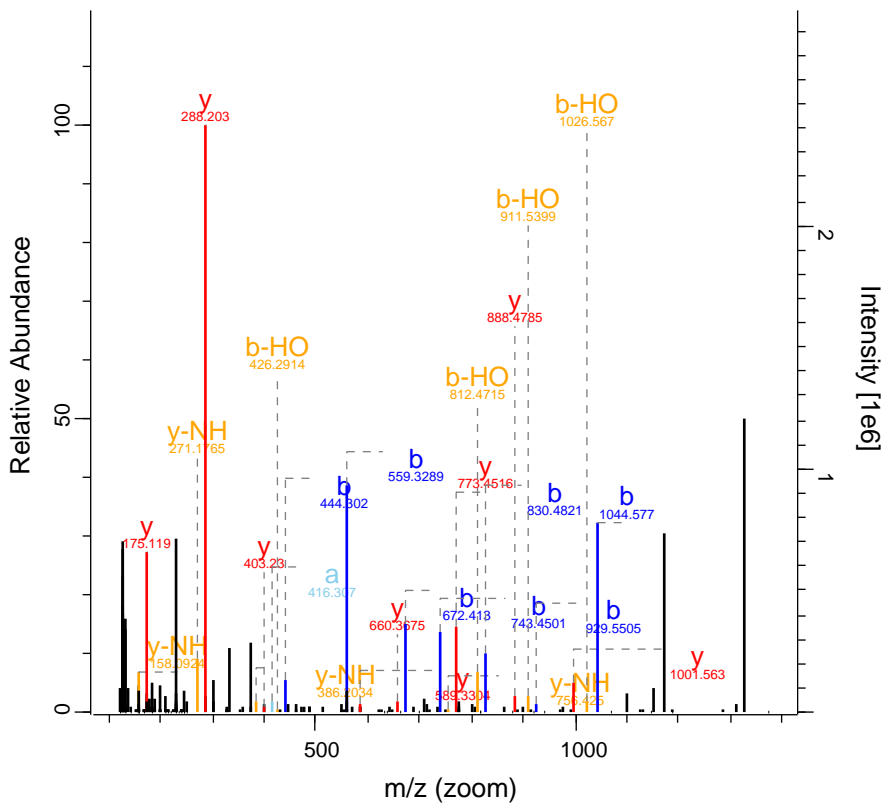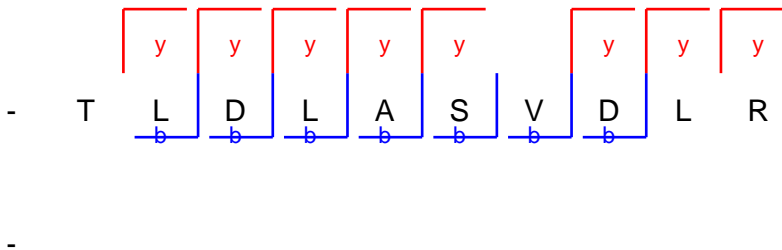

RO-QC-160121\_ZackD\_SS\_Set\_01\_Fraction 27862 FTMS; HCl 126.24 657.4 IMMP2L

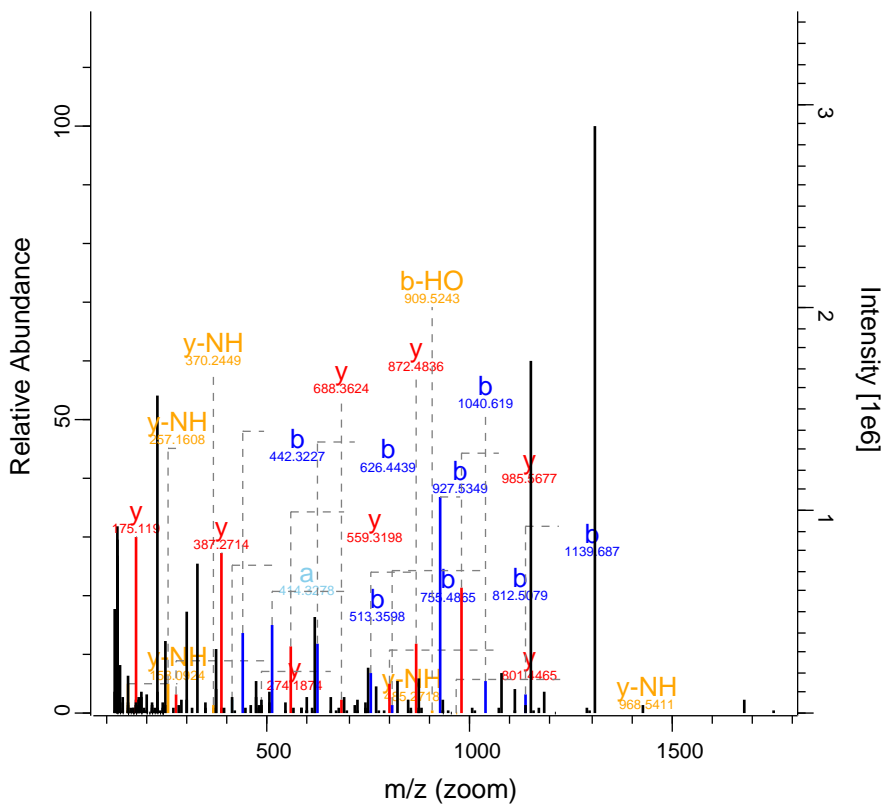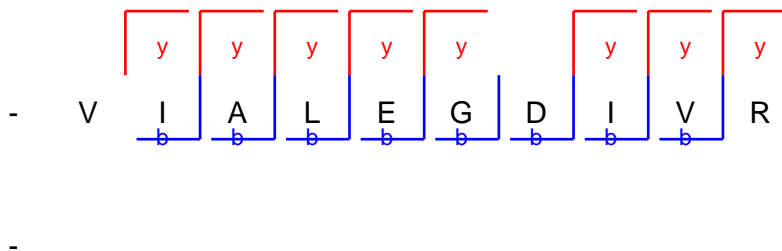

RO-QC-160121\_ZackD\_SS\_Set\_01\_Fractio 27895 FTMS; HC 118.52 849.45 SLC31A1

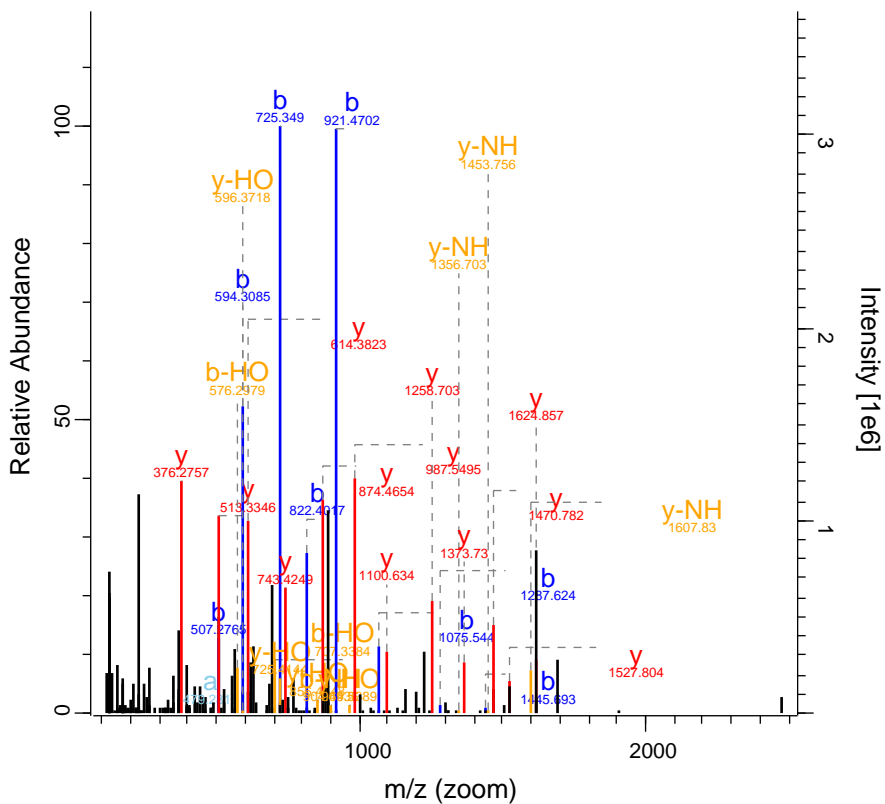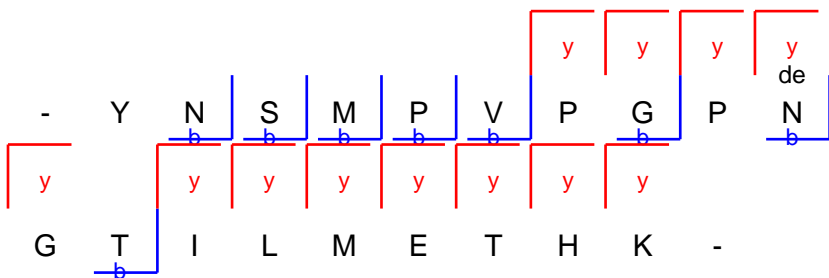

RO-QC-160121\_ZackD\_SS\_Set\_01\_Fractio 27927 FTMS; HC 121.74 637.09 SLC31A1

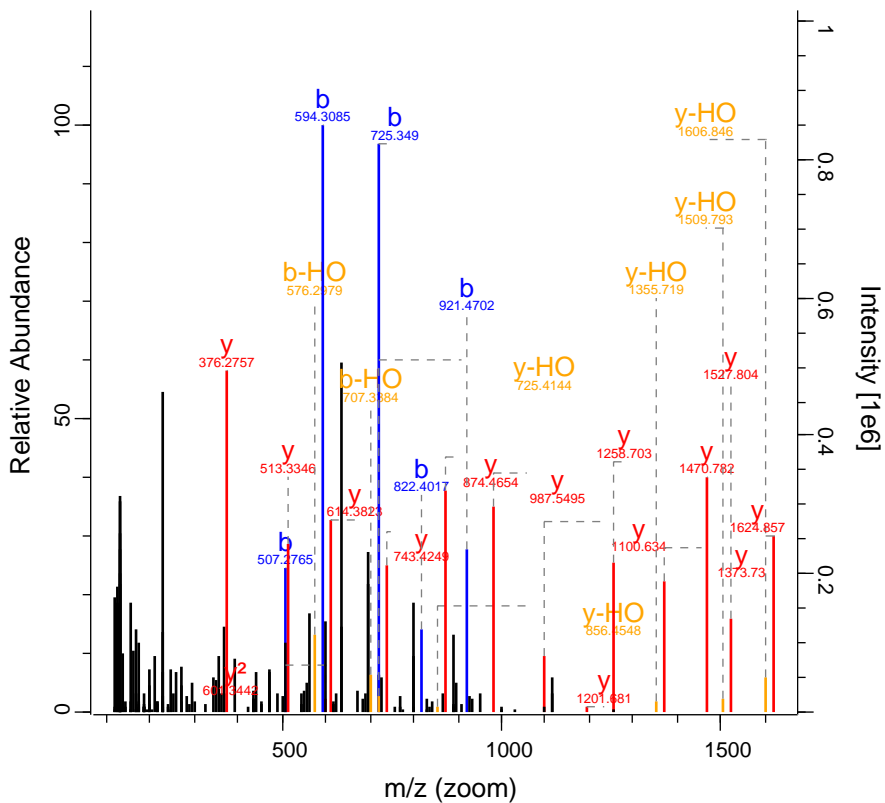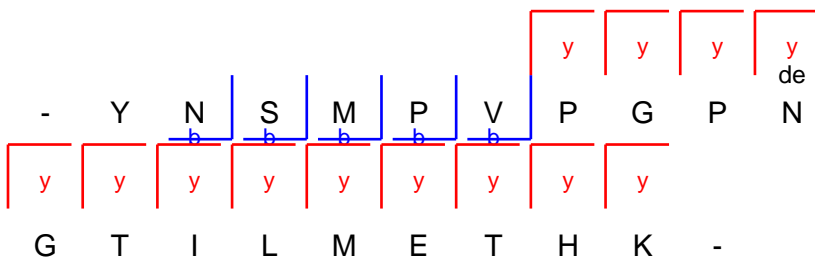

RO-QC-160121\_ZackD\_SS\_Set\_01\_Fractio 28411 FTMS; HC 144.76 937.11 GYPC

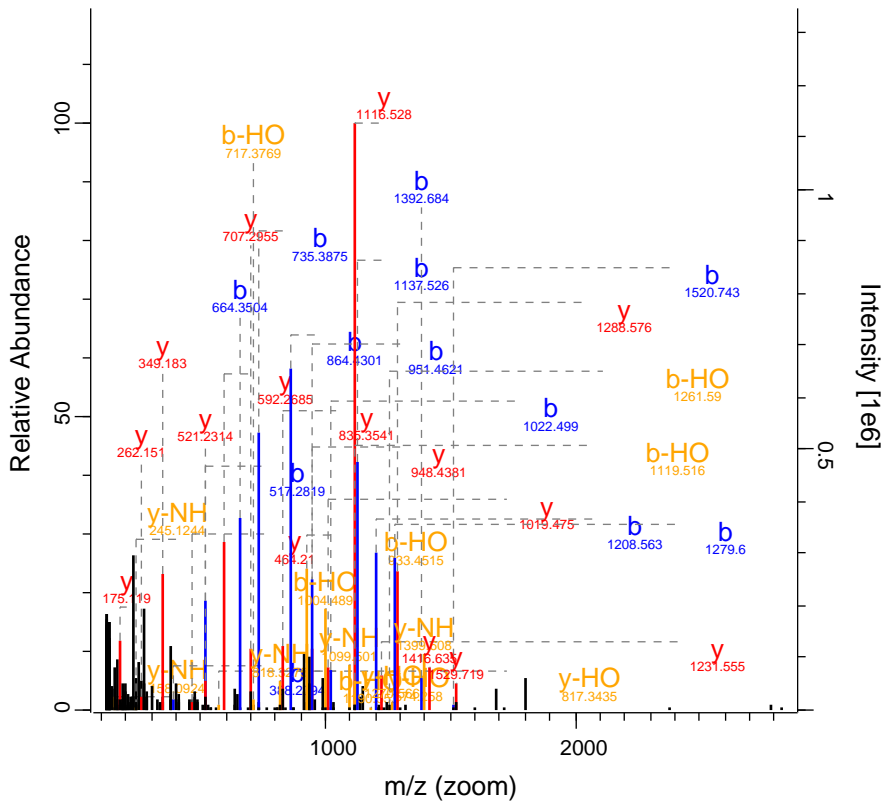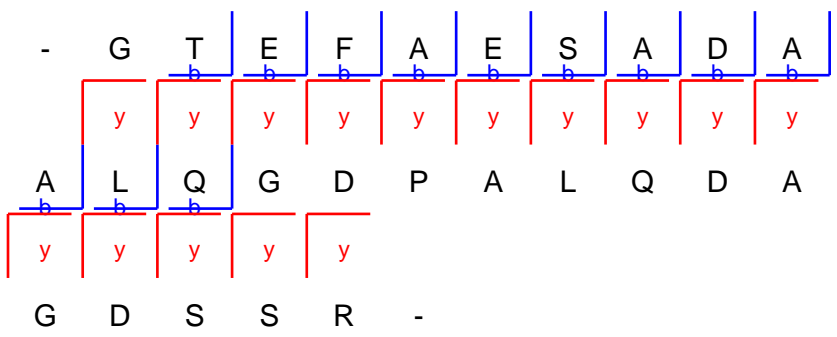

RO-QC-160121\_ZackD\_SS\_Set\_01\_Fraction 28667 FTMS; HC 88.55 874.46 SMUG1

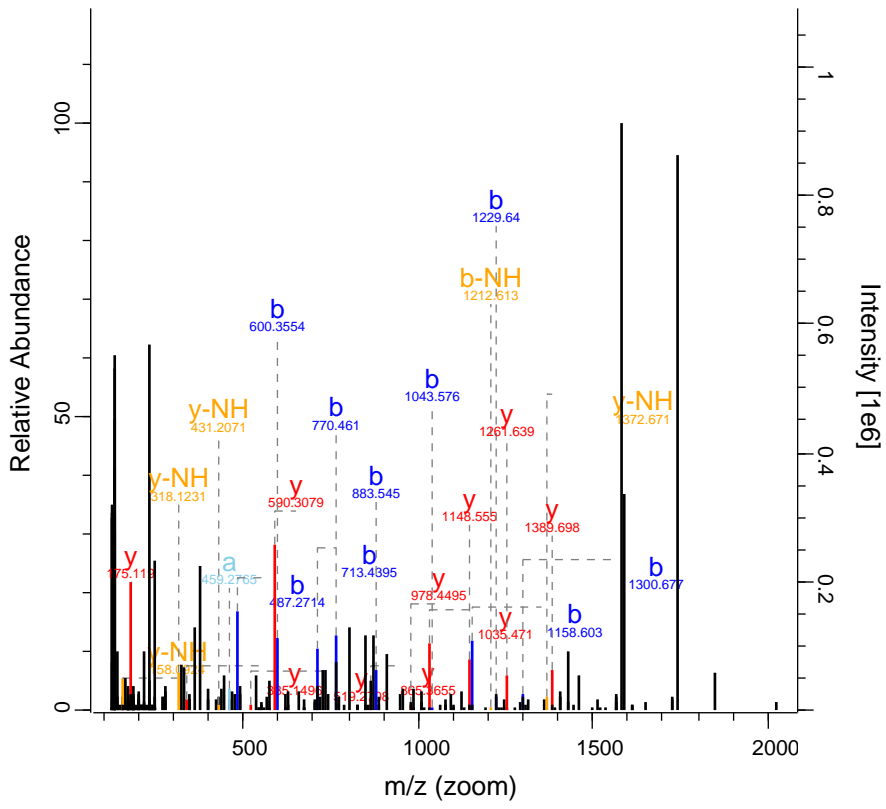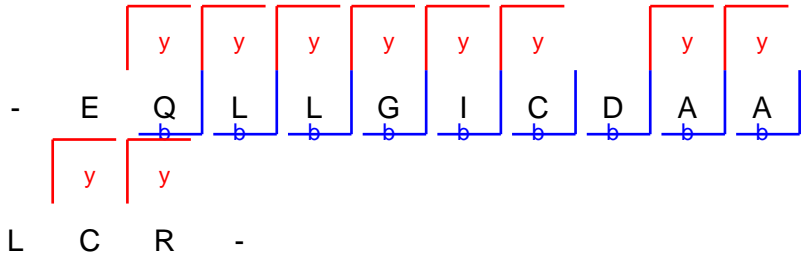

RO-QC-160121\_ZackD\_SS\_Set\_01\_Fractic 28717 FTMS; HC 56.01 1026.49 SIRPB2

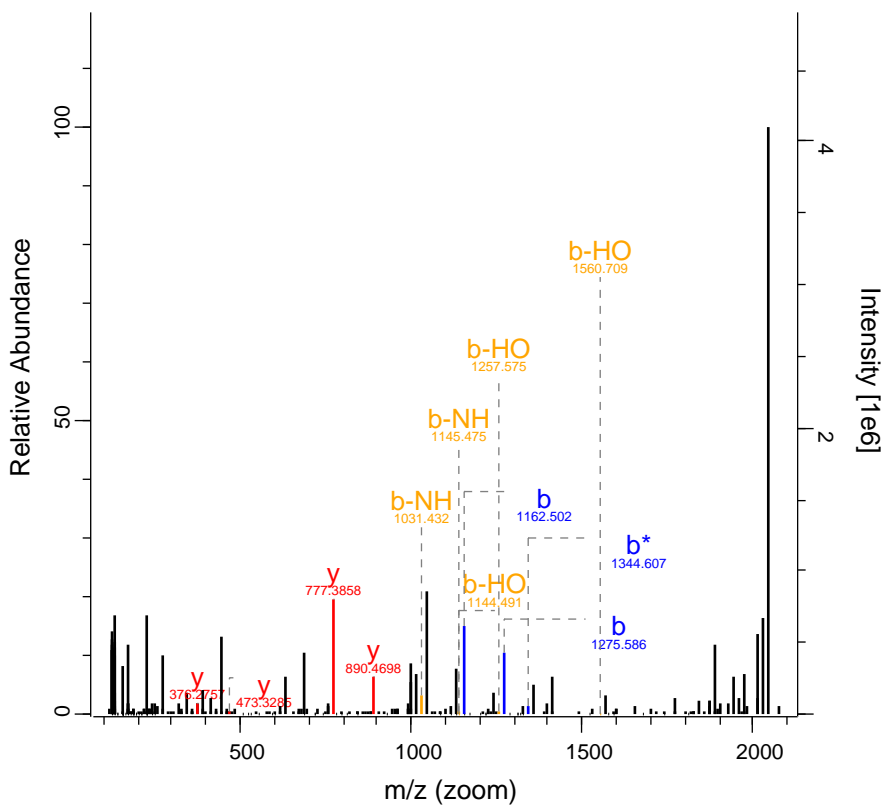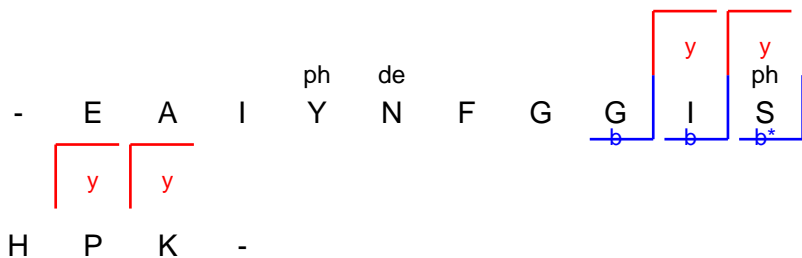



RO-QC-160121\_ZackD\_SS\_Set\_01\_Fraction 28988 FTMS; HC 78.36 829.75 TMEM117

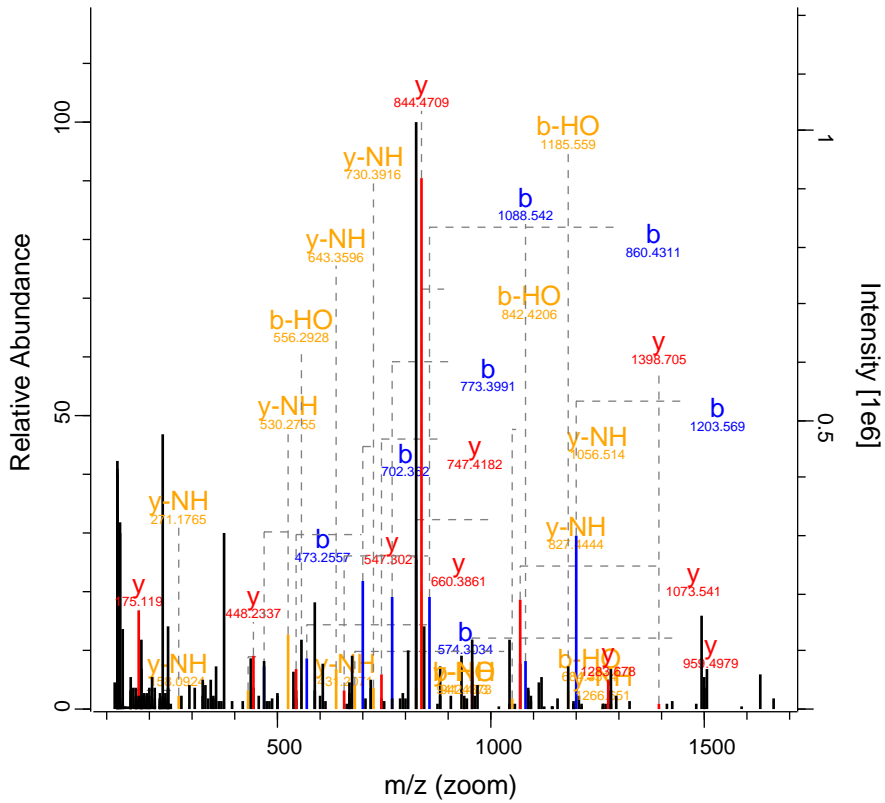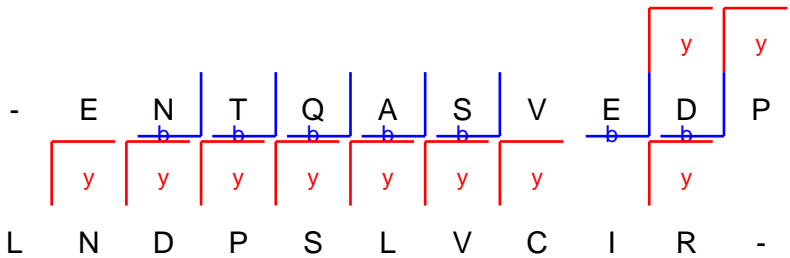



RO-QC-160121\_ZackD\_SS\_Set\_01\_Fraction 29446 FTMS; HC 42.6 737.86 TRIL

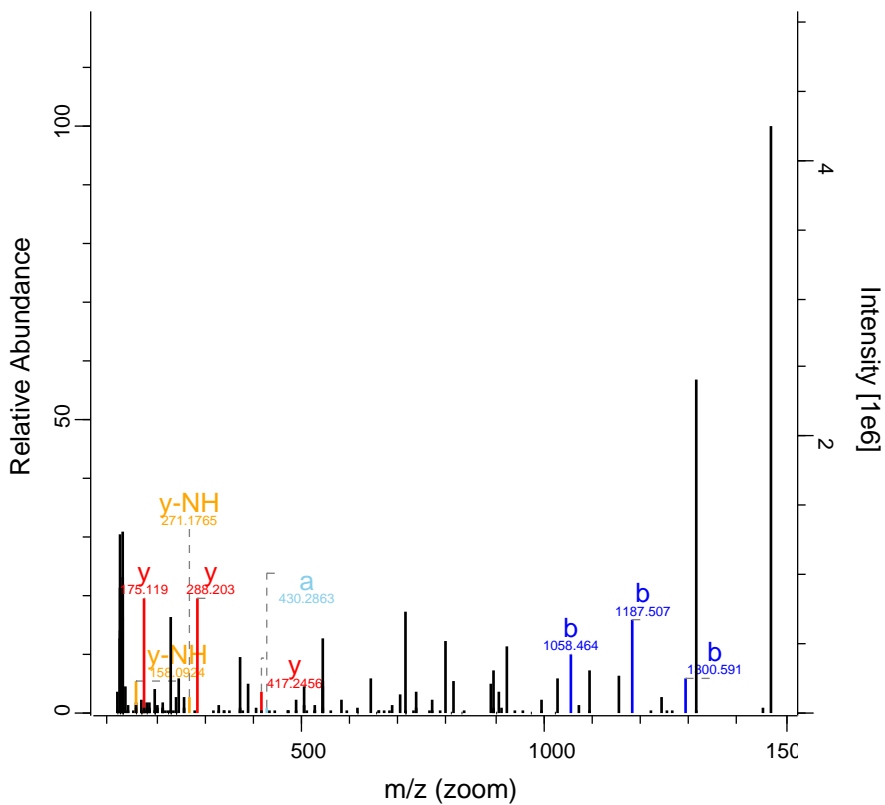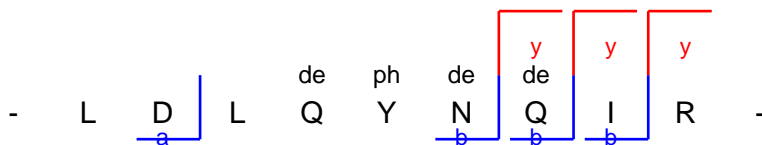



RO-QC-160121\_ZackD\_SS\_Set\_01\_Fractio 30176 FTMS; HC 101.39 800.47 PRTFDC1

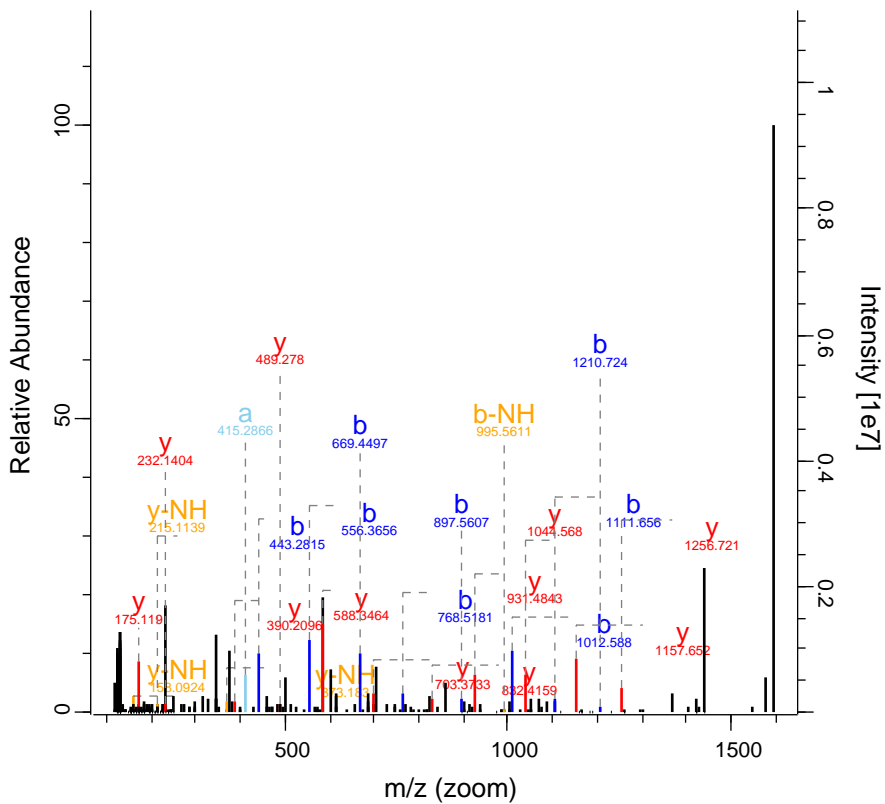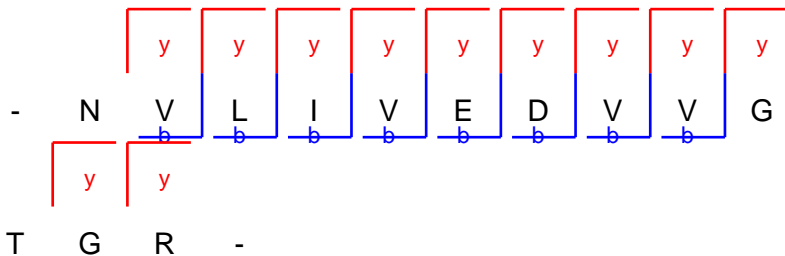

RO-QC-160121\_ZackD\_SS\_Set\_01\_Fratio 31103 FTMS; HC 113.22 577.34 MIS12

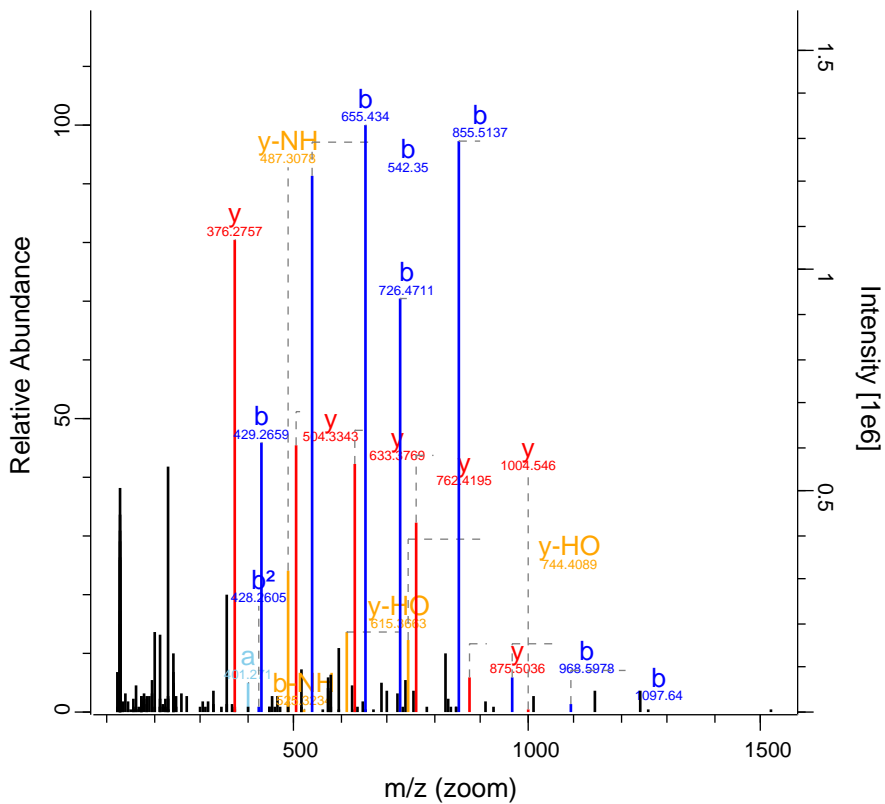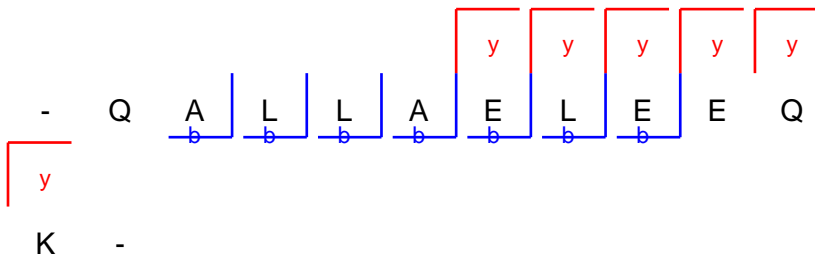

RO-QC-160121\_ZackD\_SS\_Set\_01\_Fractio 31128 FTMS; HC 110.08 865.51 MIS12

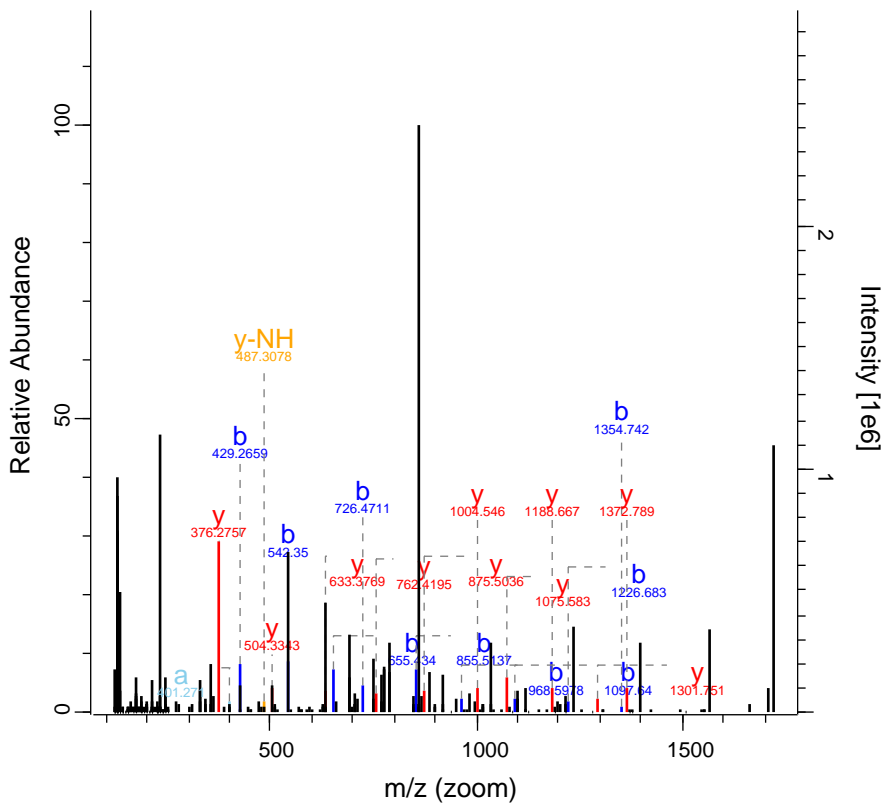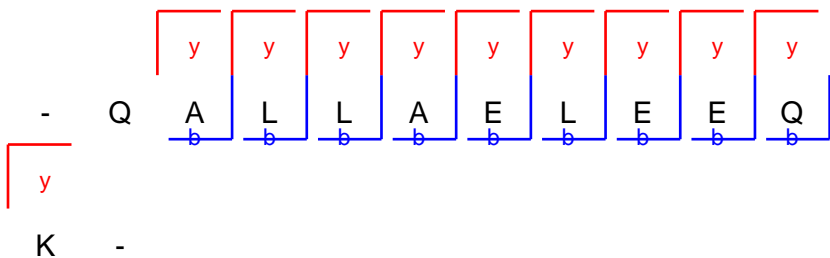

RO-QC-160121\_ZackD\_SS\_Set\_01\_Fraction 31213 FTMS; HC 57.34 911.82 MXD3

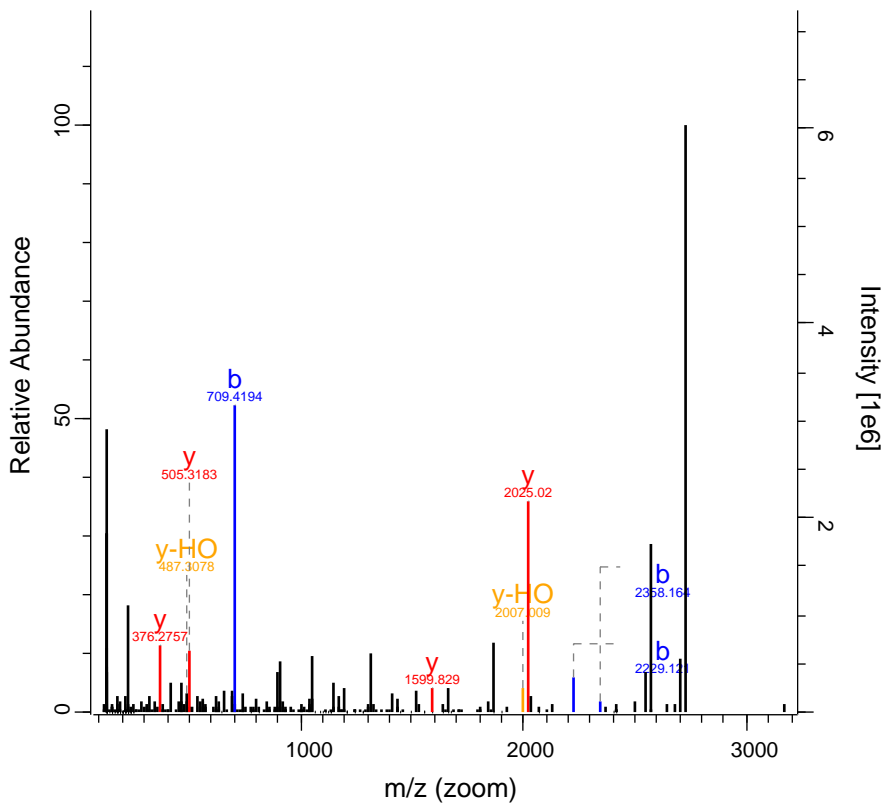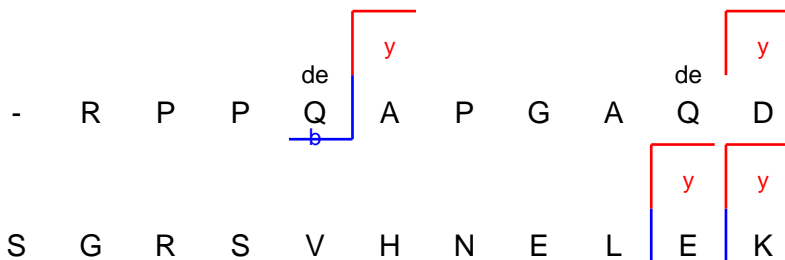



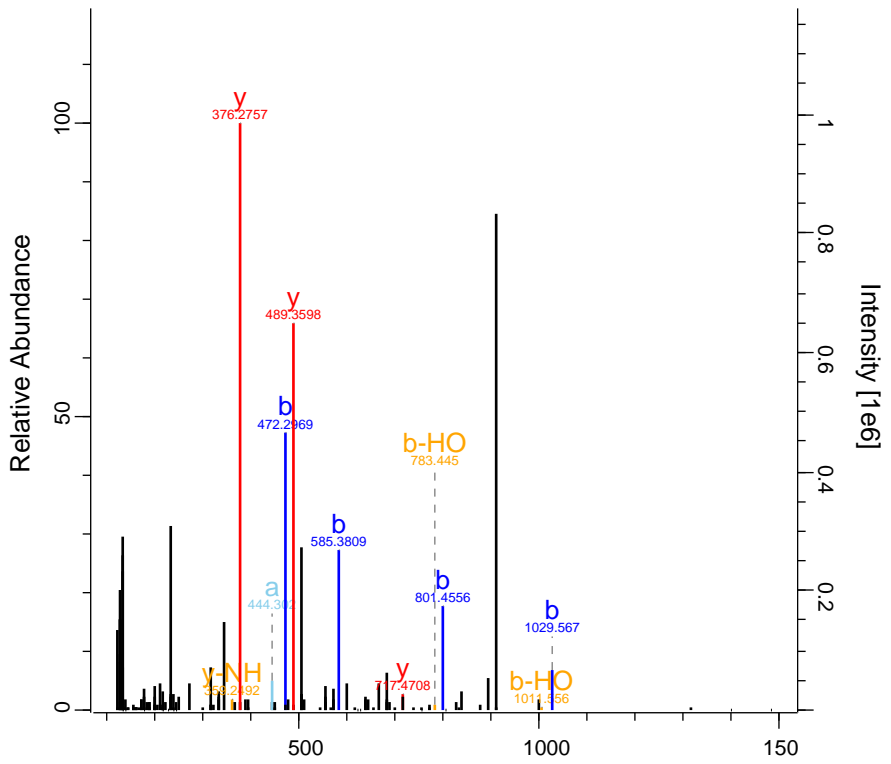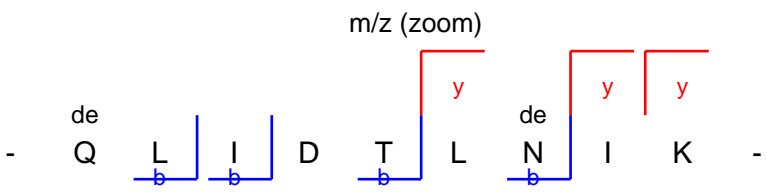

RO-QC-160121\_ZackD\_SS\_Set\_01\_Fraction 31723 FTMS; HC 115.7 501.61 ATF6B

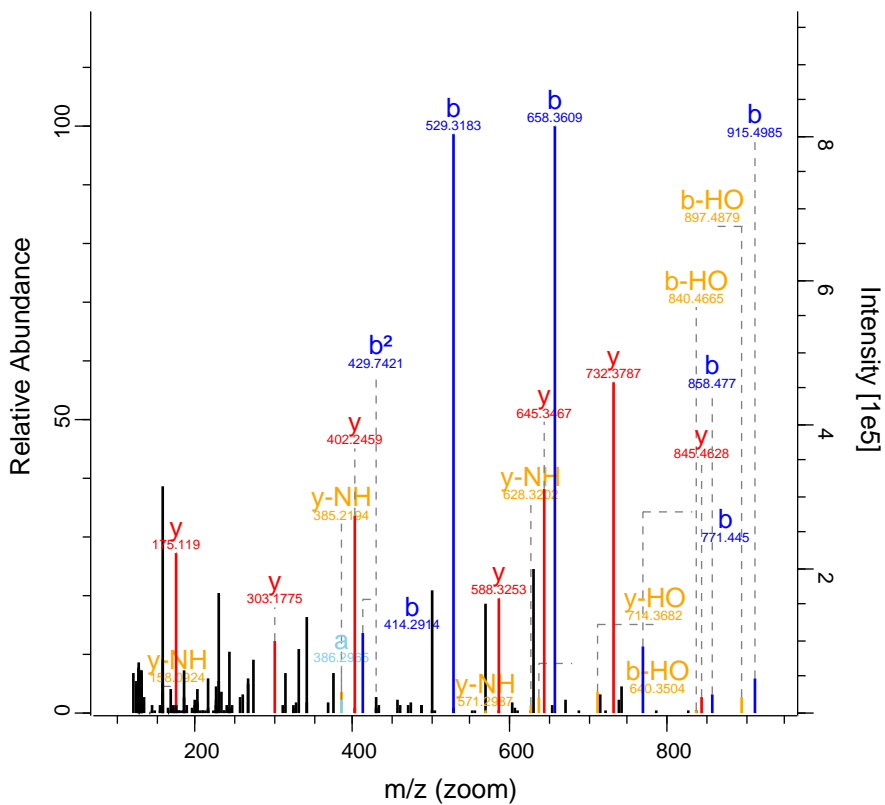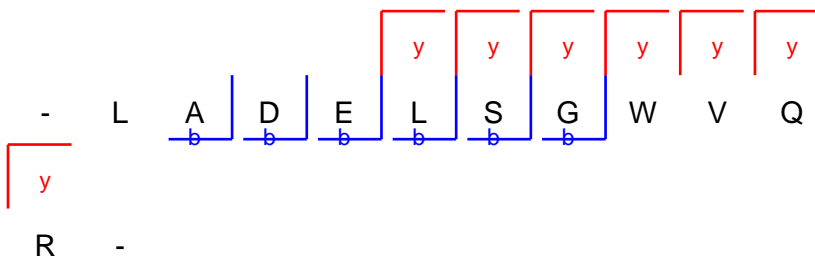



RO-QC-160121\_ZackD\_SS\_Set\_01\_Fractio 32176 FTMS; HC 149.85 687.63 TMUB2

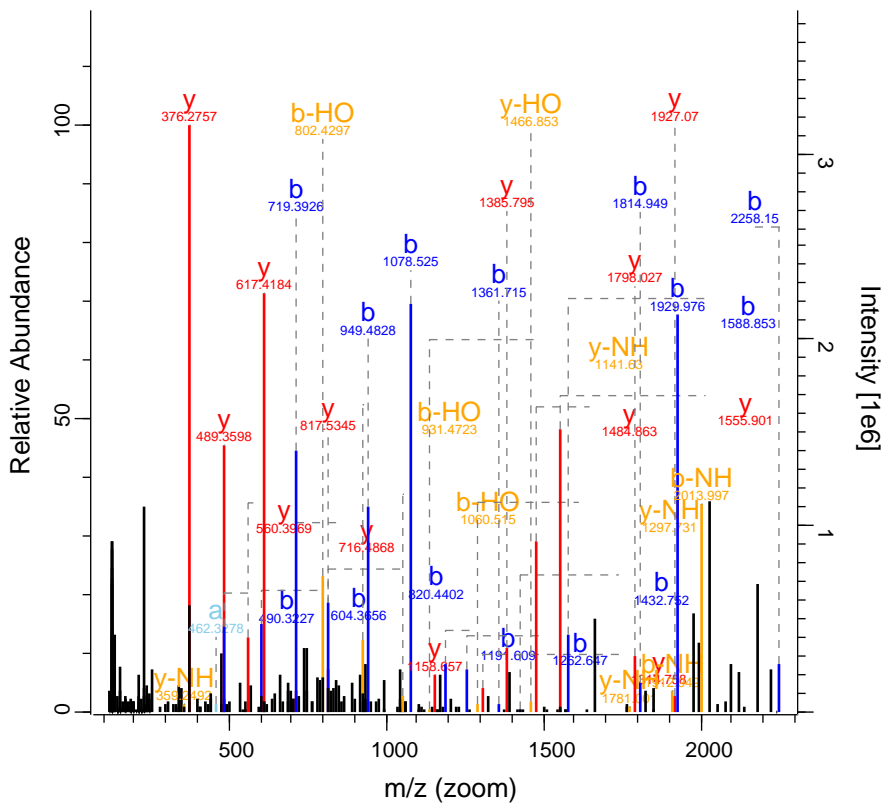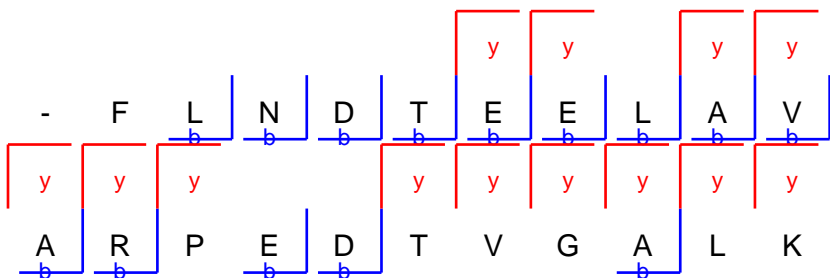





RO-QC-160121\_ZackD\_SS\_Set\_01\_Fractic 35232 FTMS; HC 178.69 1068.91 FAM122A

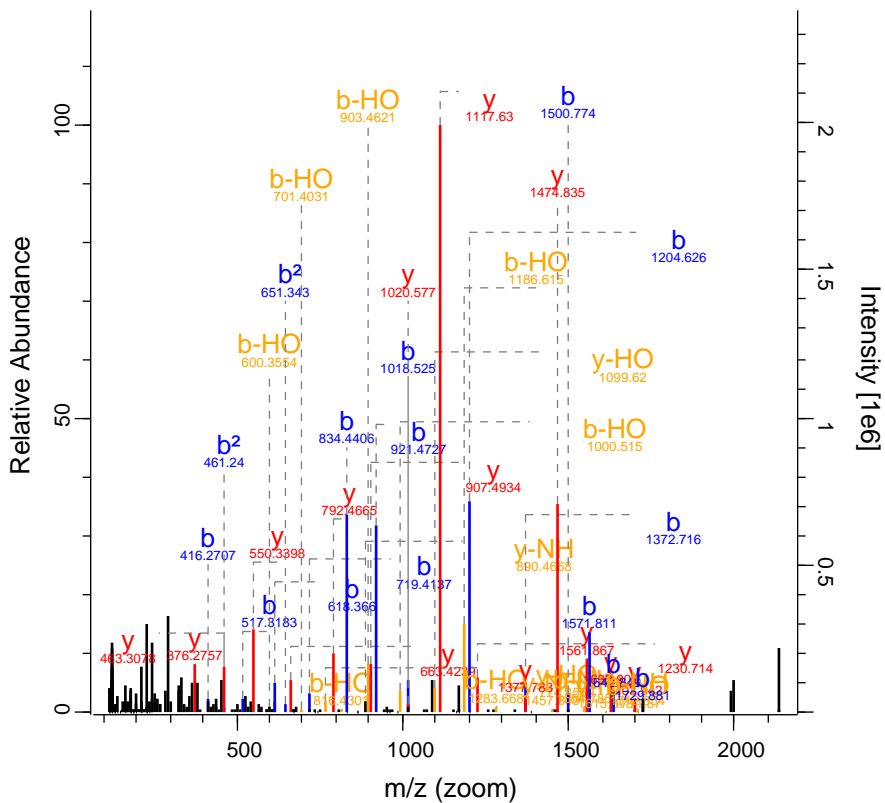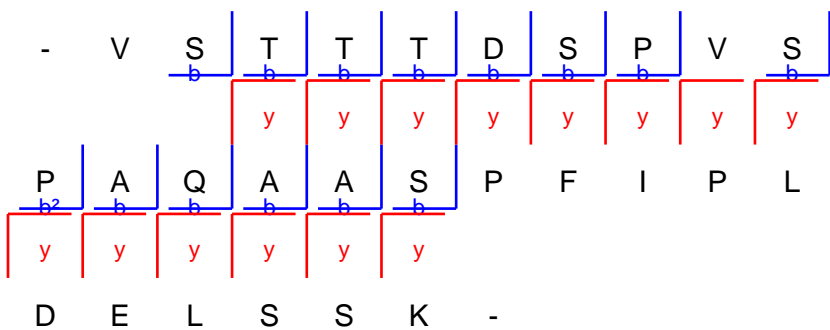

RO-QC-160121\_ZackD\_SS\_Set\_01\_Fractio 35267 FTMS; HC 39.99 801.94 FAM122A

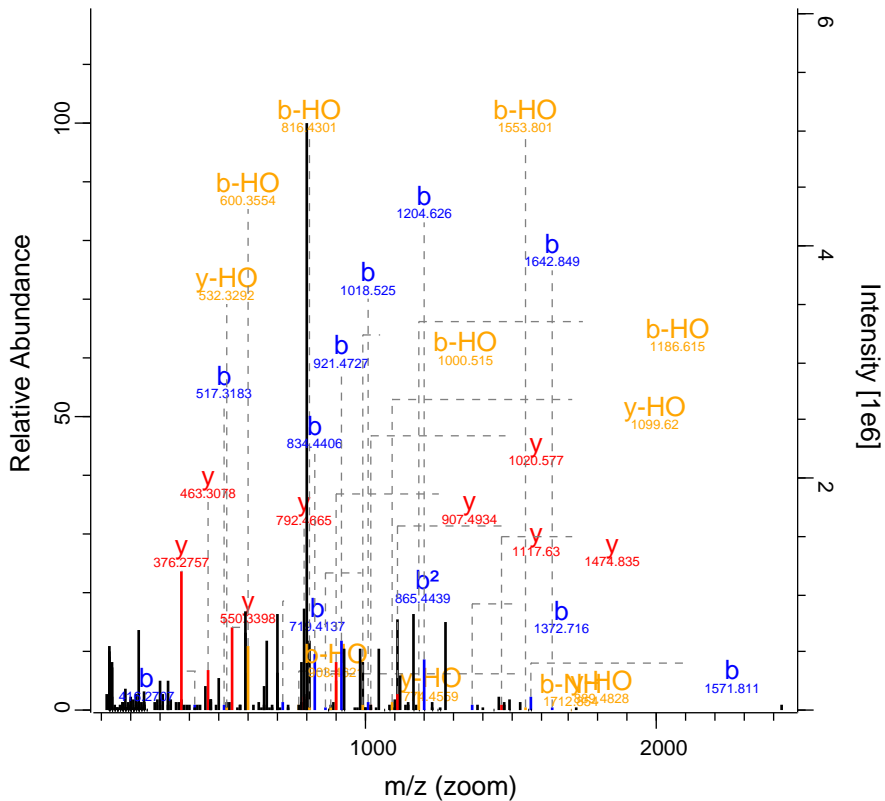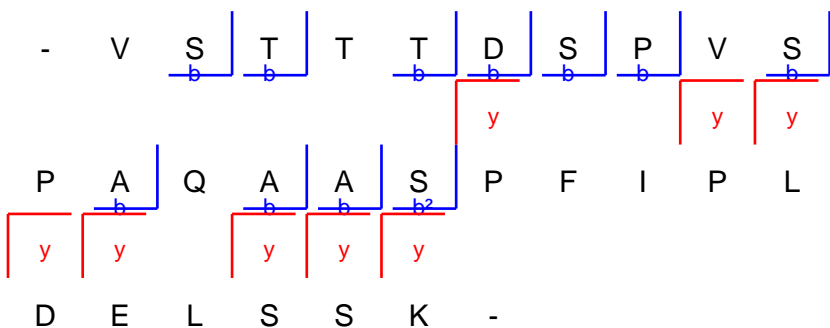



RO-QC-160121\_ZackD\_SS\_Set\_01\_Fraction 35297 FTMS; HC 67.96 620.36 WNT11

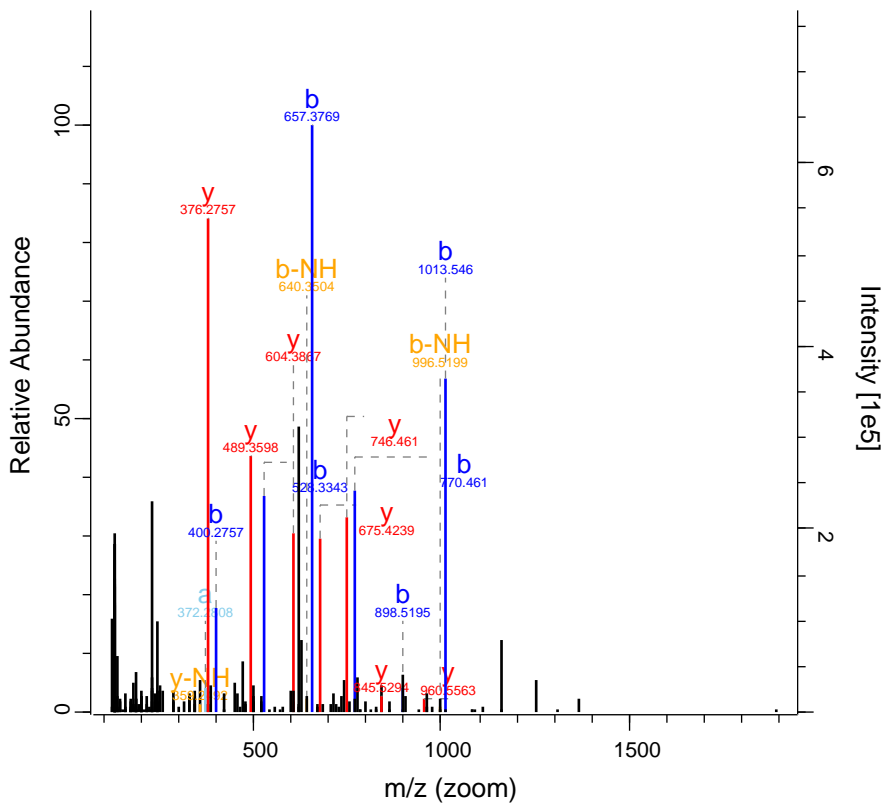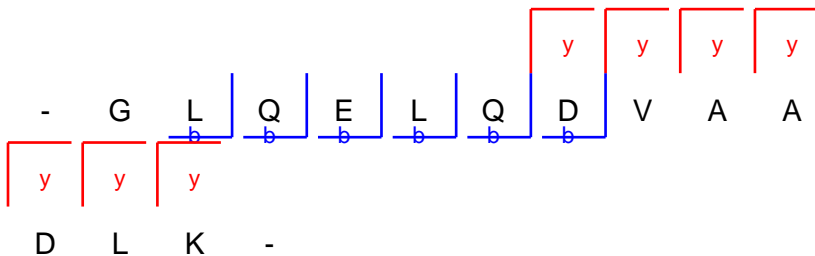

Raw File

Scan Method Score m/z

RO-QC-160121\_ZackD\_SS\_Set\_01\_Fraction\_4

35481 FTMS; HCD 54.41 771.41

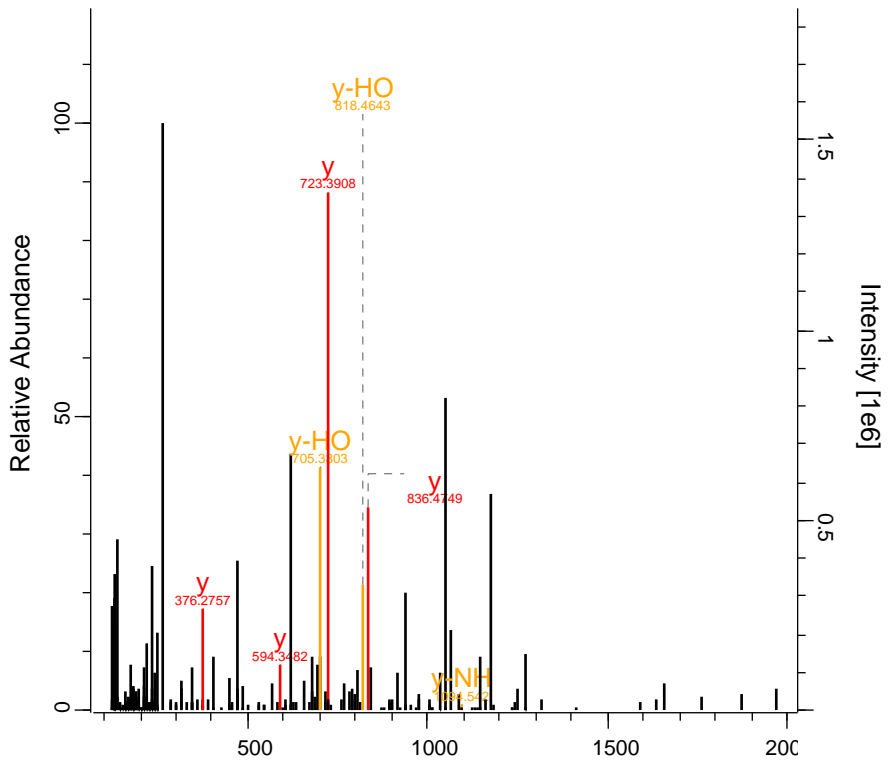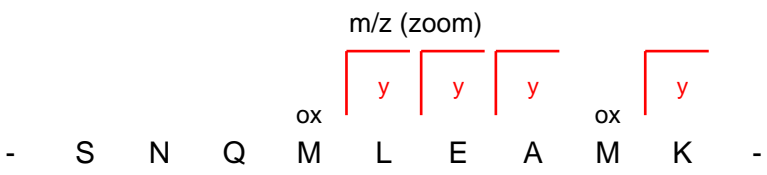

RO-QC-160121\_ZackD\_SS\_Set\_01\_Fraction 35769 FTMS; HC 71.08 663.67 ABRACL

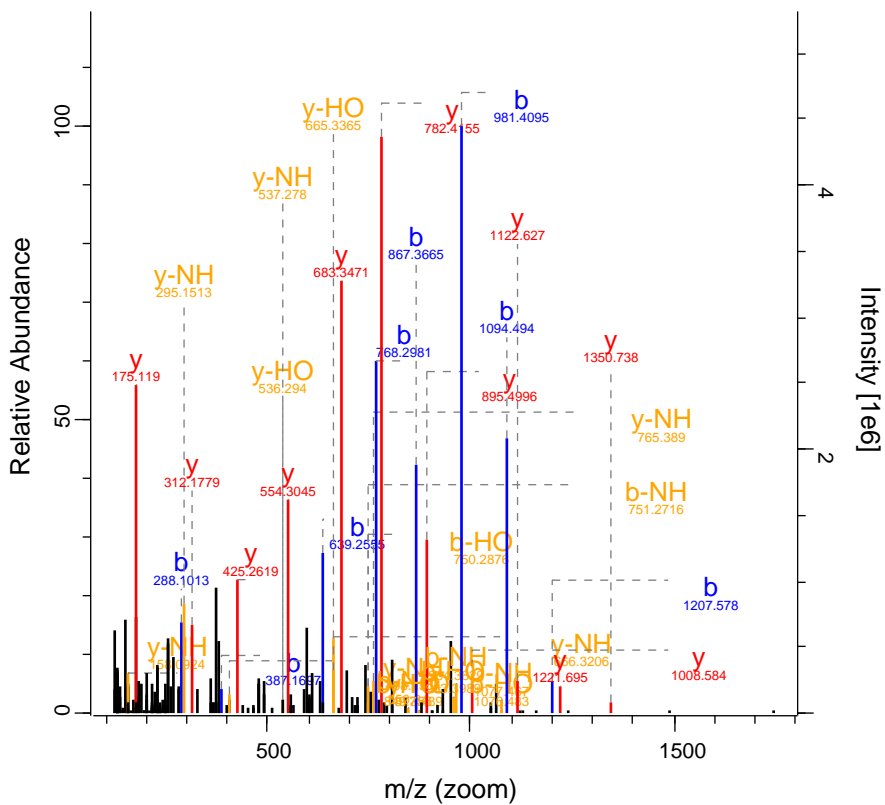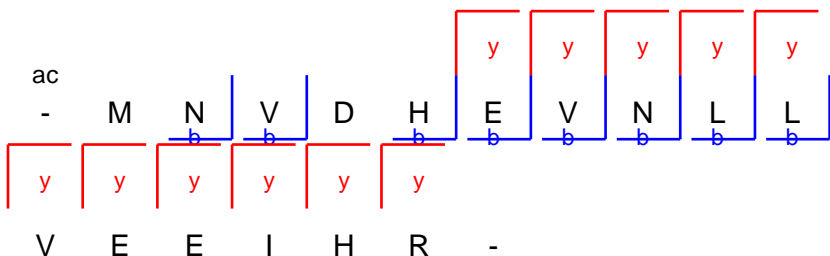

RO-QC-160121\_ZackD\_SS\_Set\_01\_Fractic 36357 FTMS; HC 89.55 1230.64 NEK10

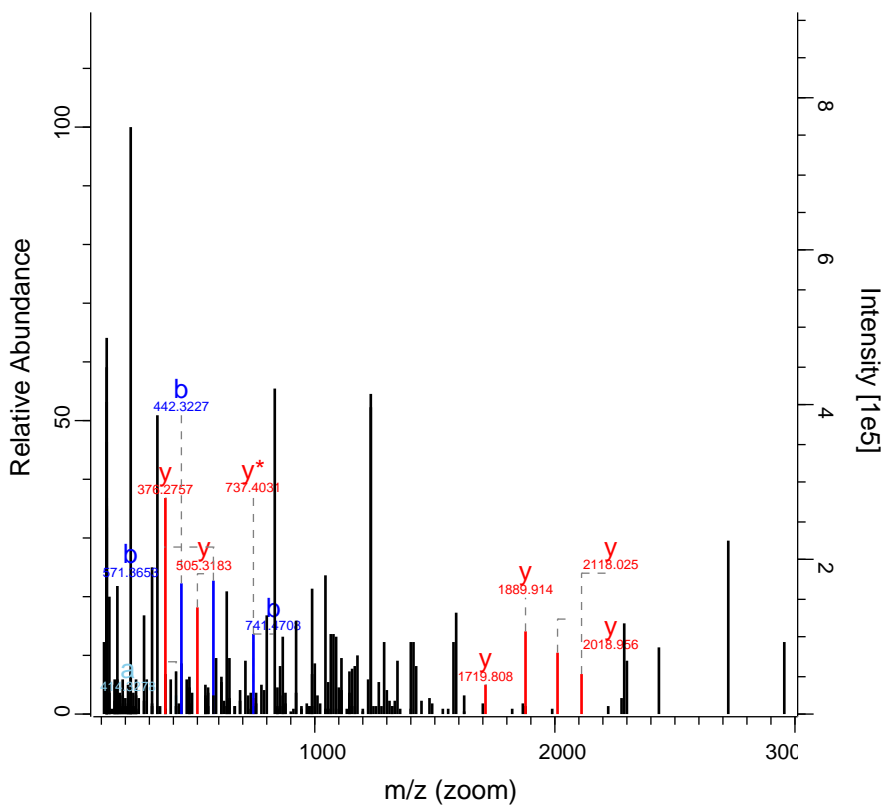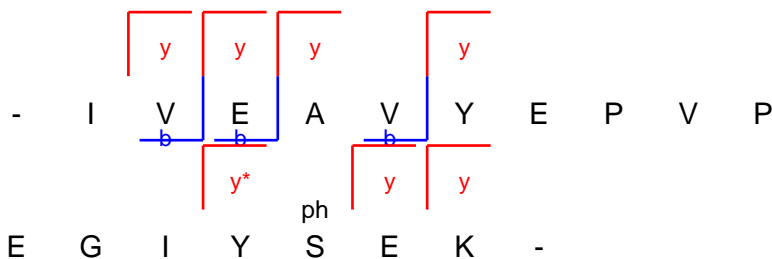

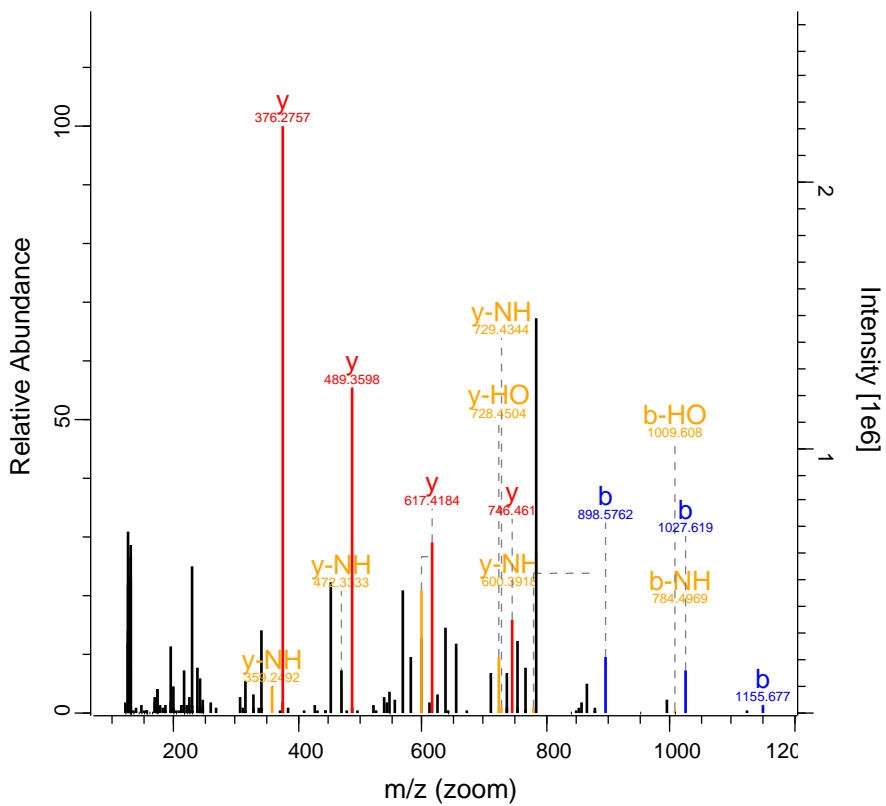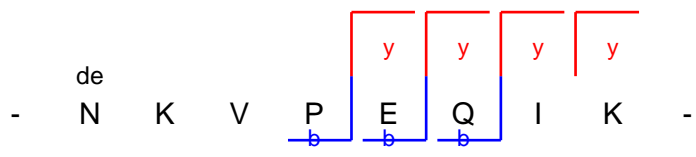

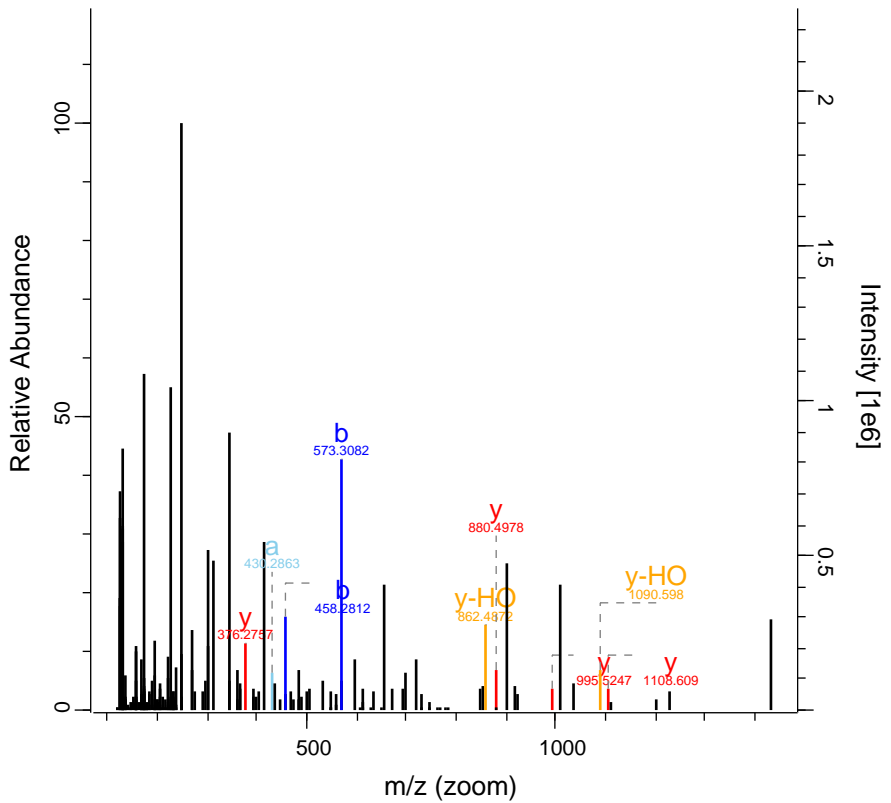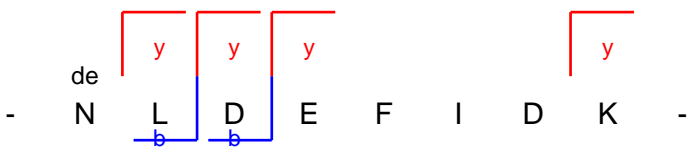

RO-QC-160121\_ZackD\_SS\_Set\_01\_Fraction 5422 FTMS; HCl 41.98 786.39 HAS1

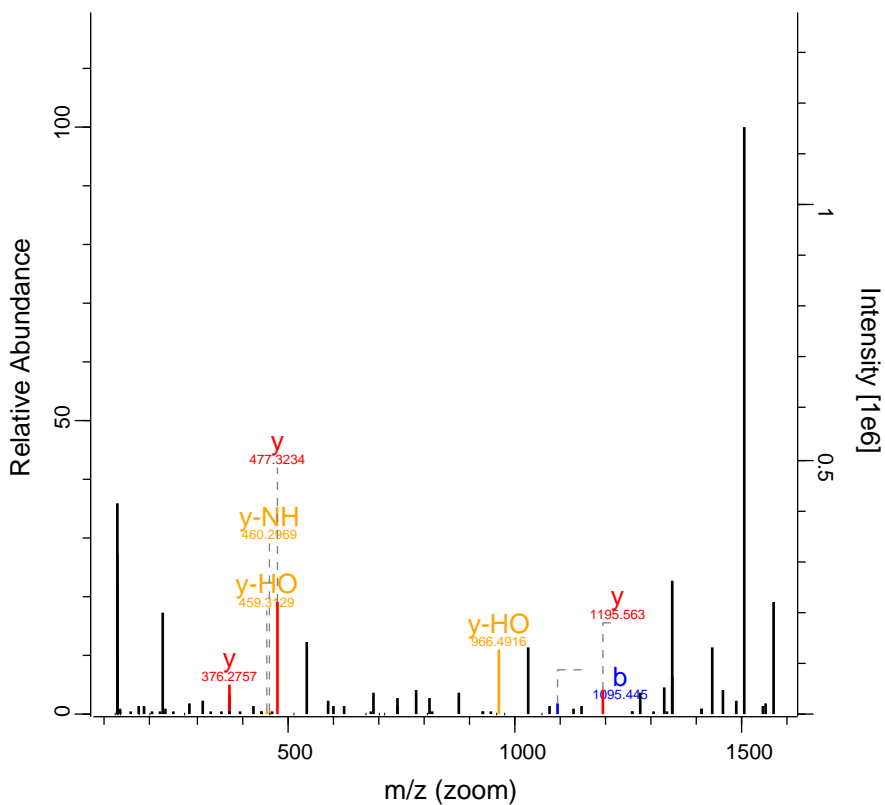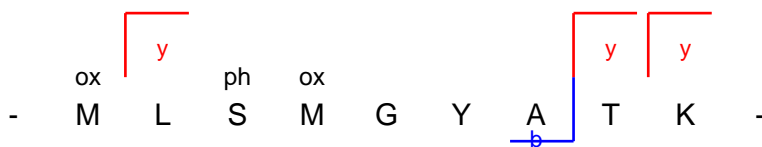

RO-QC-160121\_ZackD\_SS\_Set\_01\_Fraction 5806 FTMS; HC 191.85 621.34 FAM89A

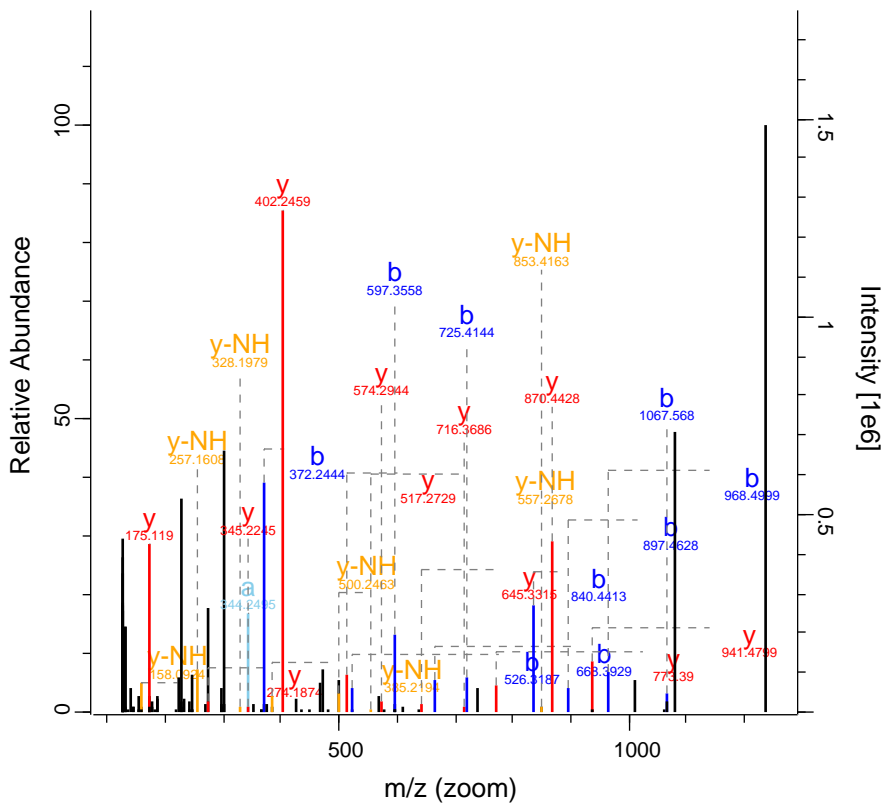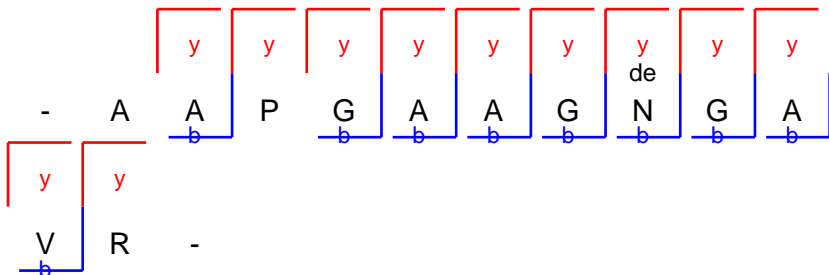



RO-QC-160121\_ZackD\_SS\_Set\_01\_Fraction 5861 FTMS; HCl 32.41 459.28 GTF3A

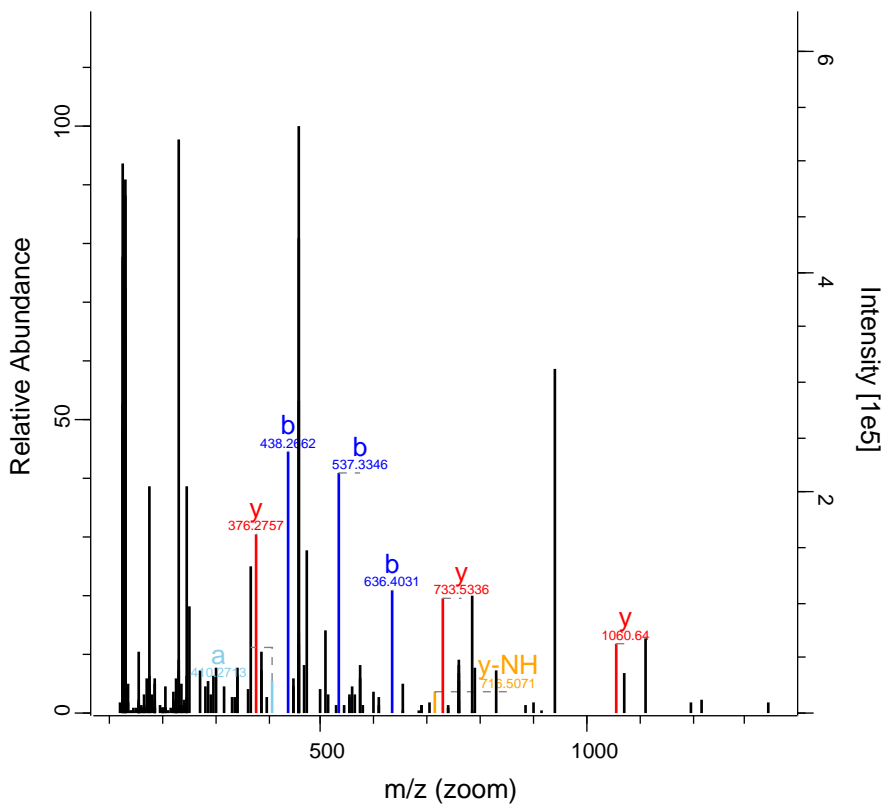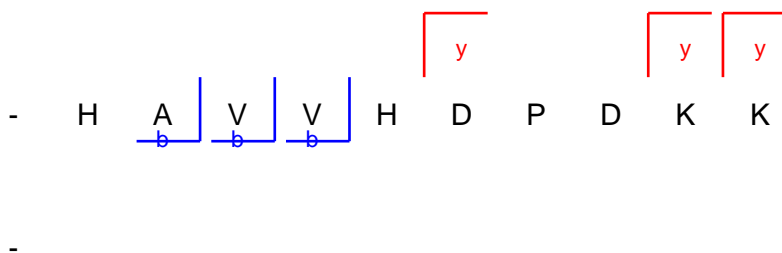

RO-QC-160121\_ZackD\_SS\_Set\_01\_Fraction 6811 FTMS; HCl 87.52 658.01 KIF26B

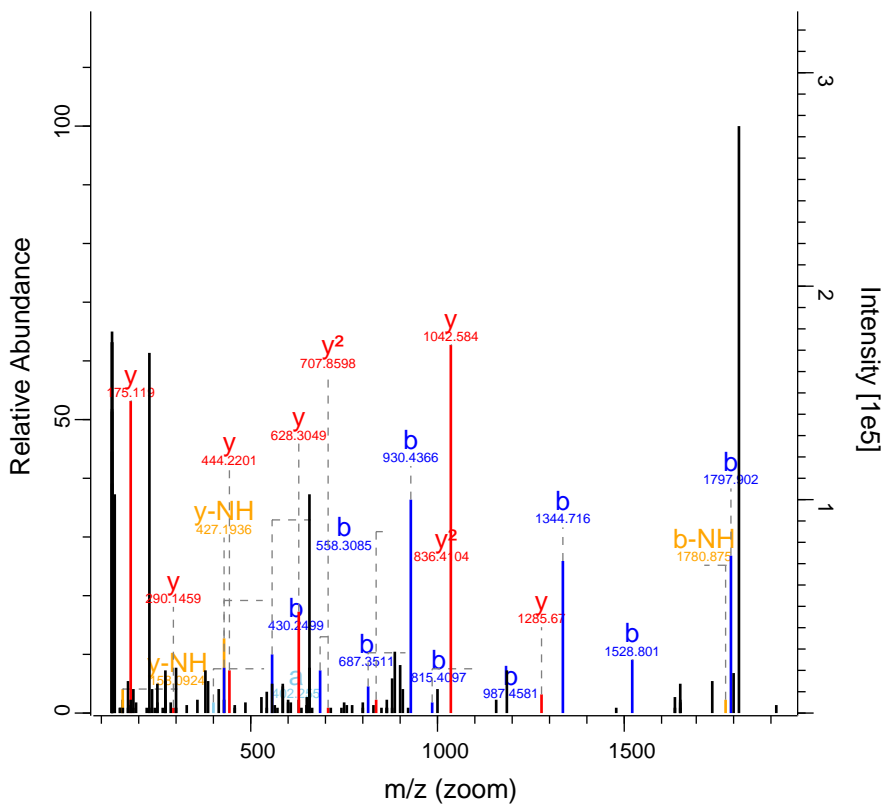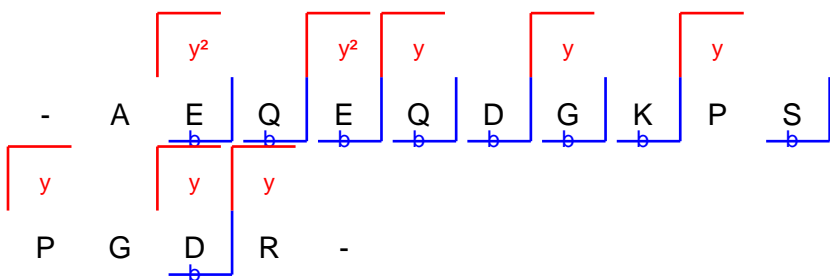

RO-QC-160121\_ZackD\_SS\_Set\_01\_Fraction 7165 FTMS; HCl 93.35 646.37 UTP23

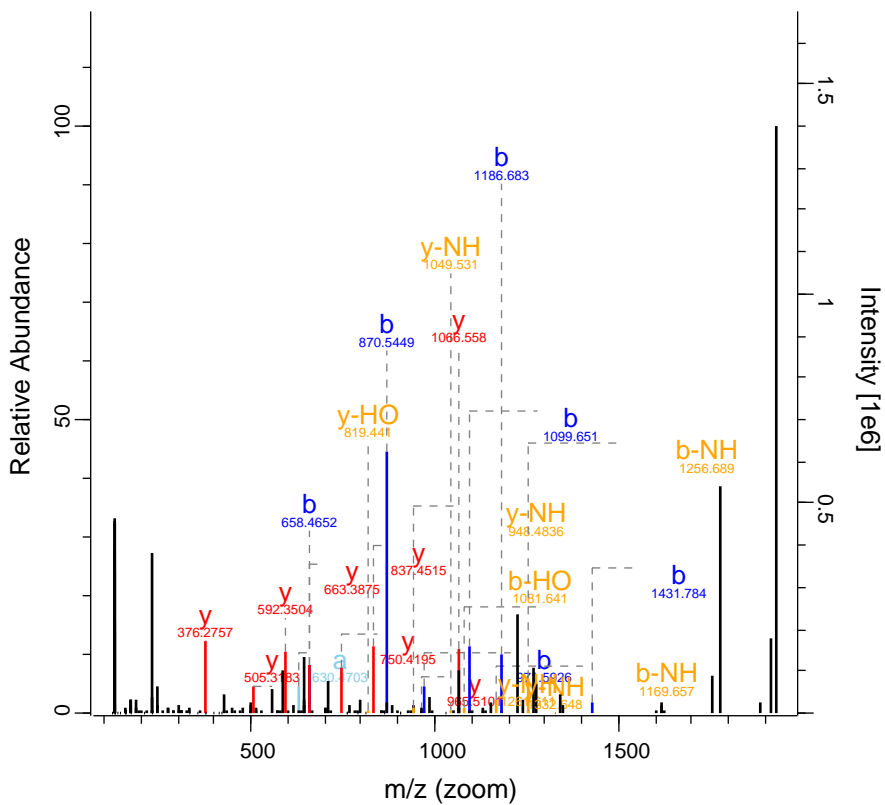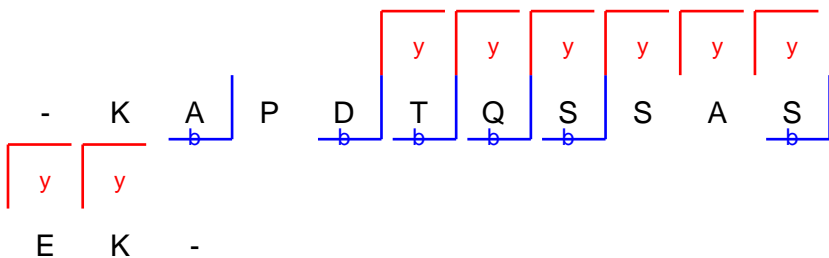

RO-QC-160121\_ZackD\_SS\_Set\_01\_Fraction 7463 FTMS; HCl 57.6 386.97 DESI2

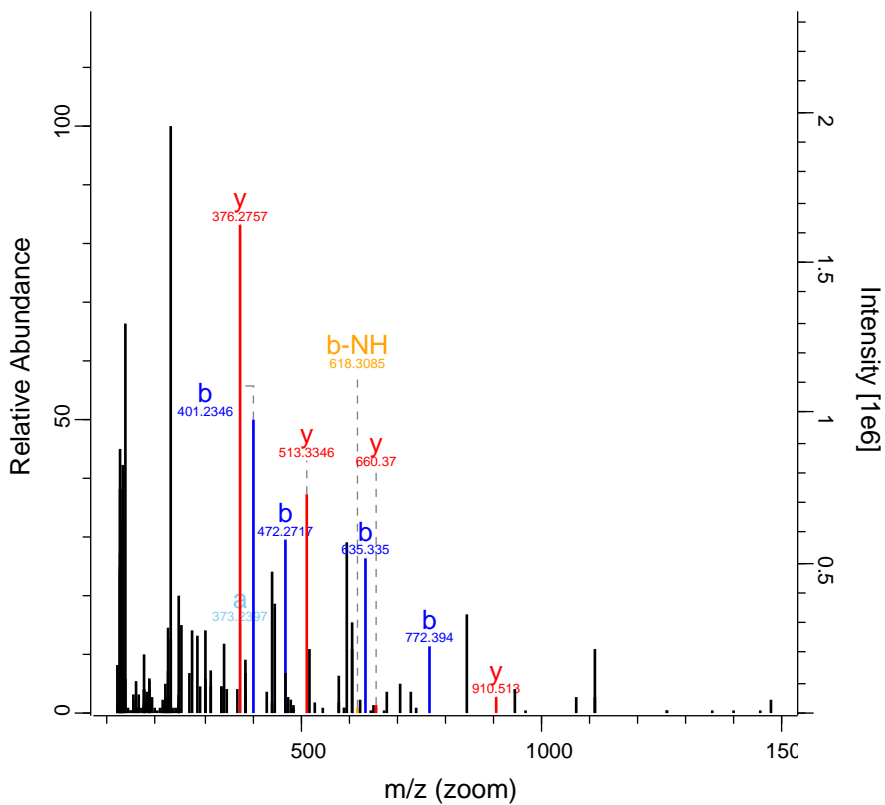

m/z (zoom)

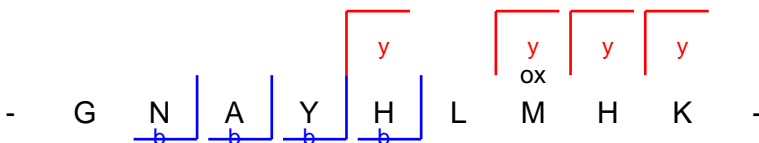

RO-QC-160121\_ZackD\_SS\_Set\_01\_Fraction 7679 FTMS; HCl 106.38 552.8 ASB3

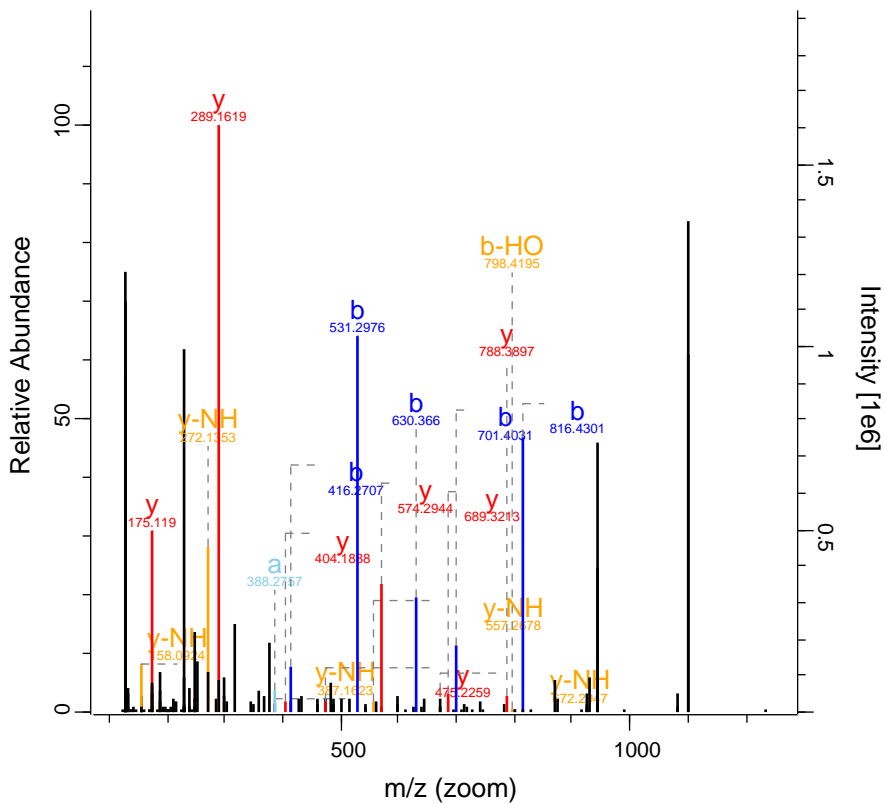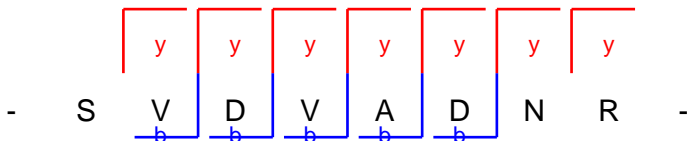

Raw File

Scan Method Score m/z

RO-QC-160121\_ZackD\_SS\_Set\_01\_Fraction\_5

8040 FTMS; HCD 102.62 437.77

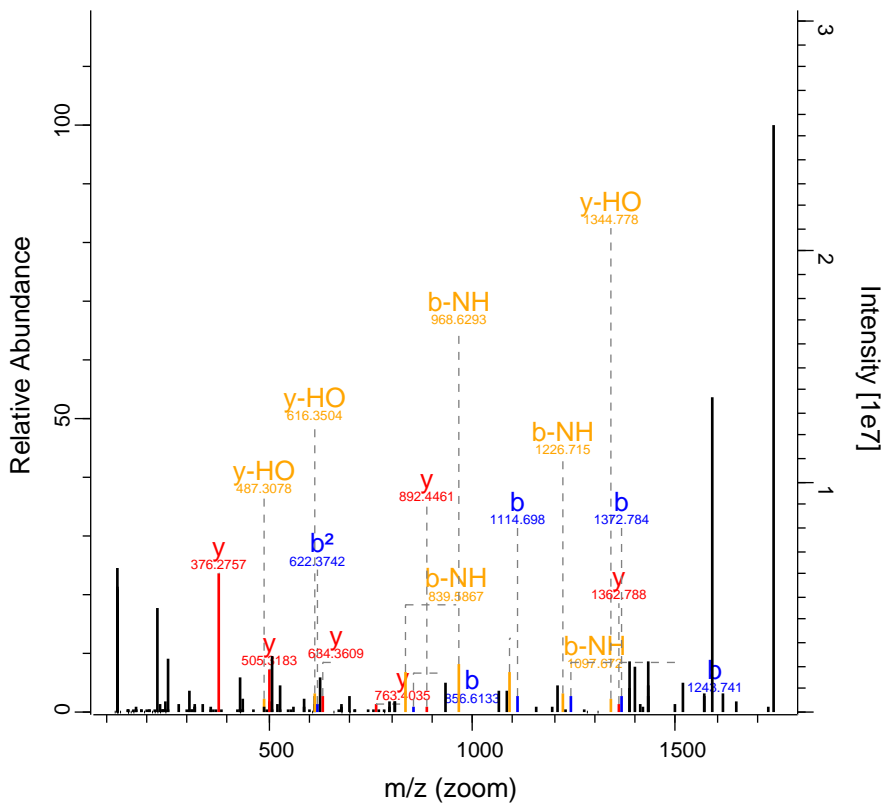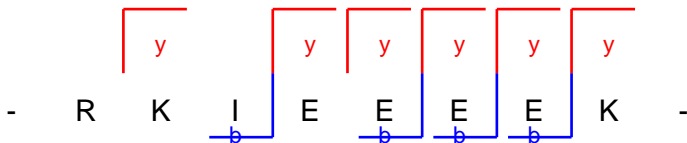

RO-QC-160121\_ZackD\_SS\_Set\_01\_Fraction 8927 FTMS; HCl 75.38 499.62 KLHL8

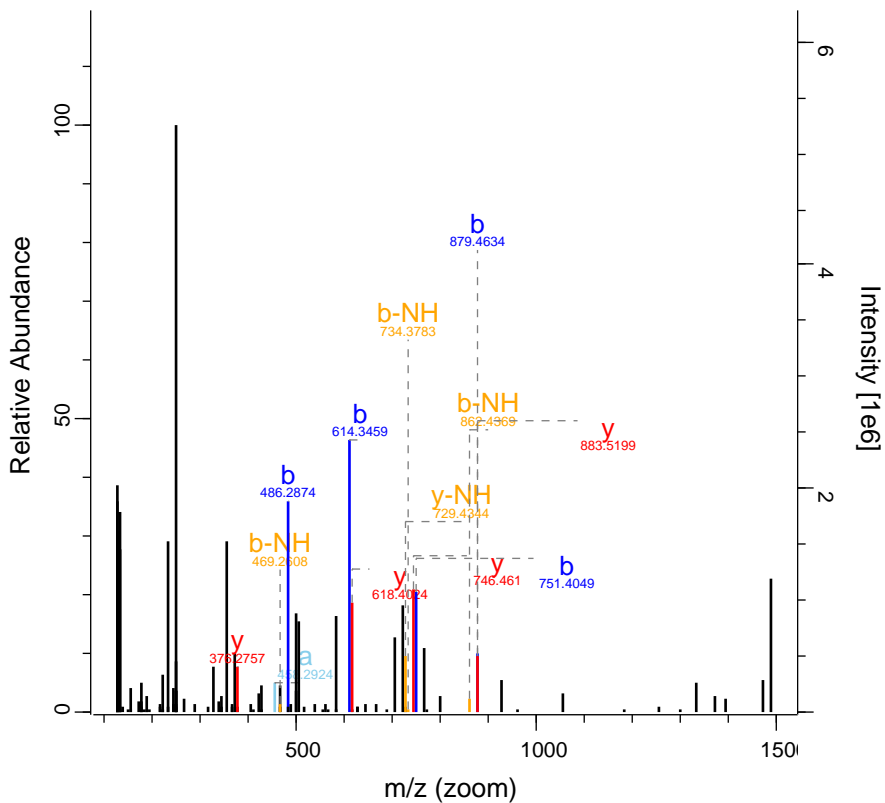

m/z (zoom)

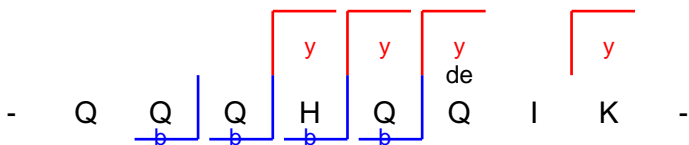

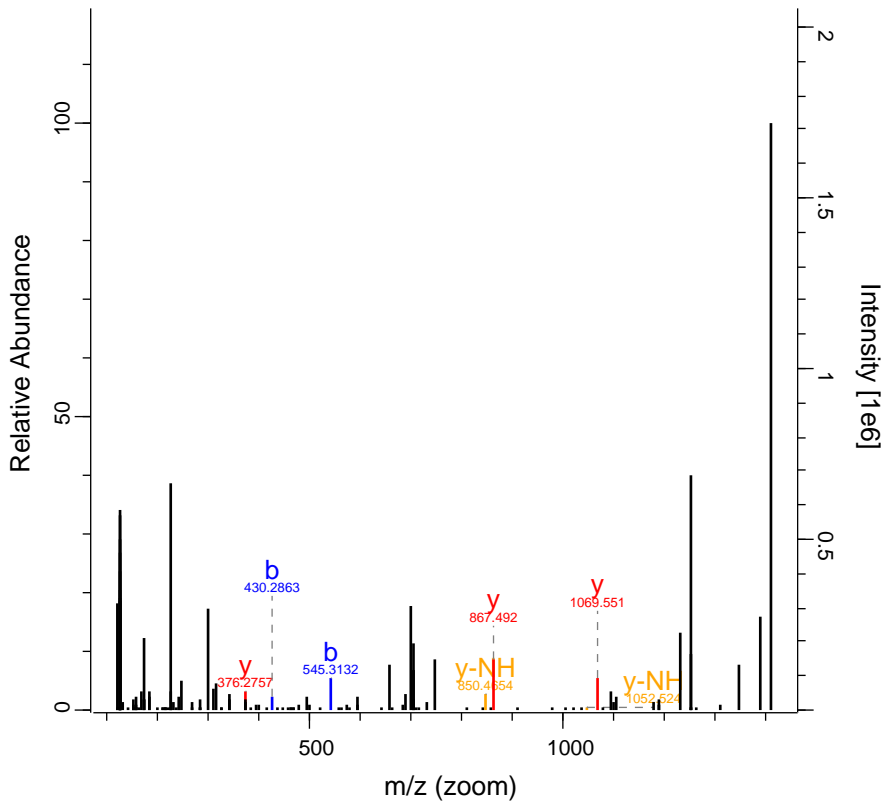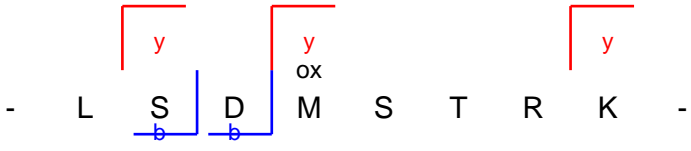



RO-QC-160121\_ZackD\_SS\_Set\_01\_Fraction 11036 FTMS; HCl151.79 691.4 KIAA0586

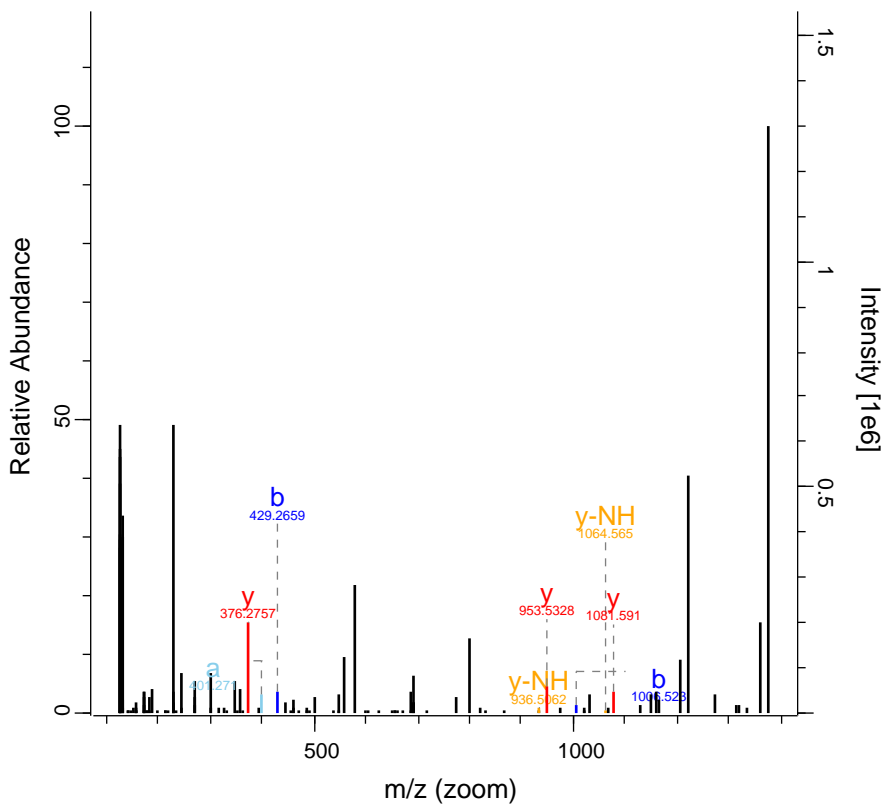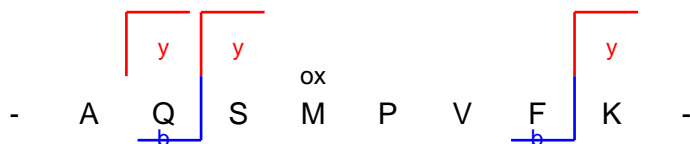

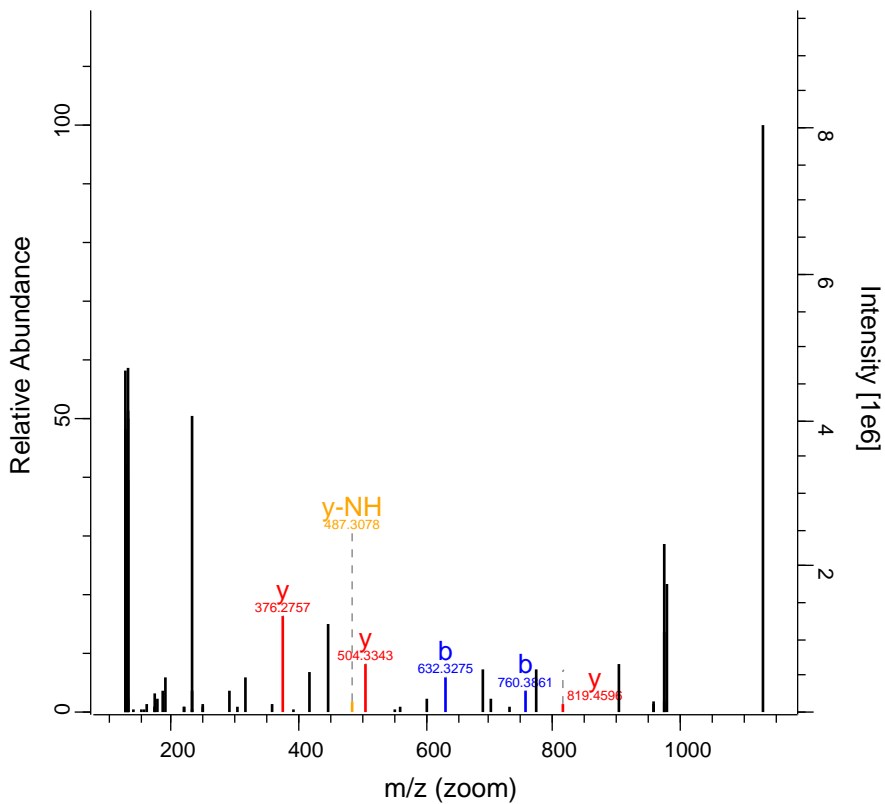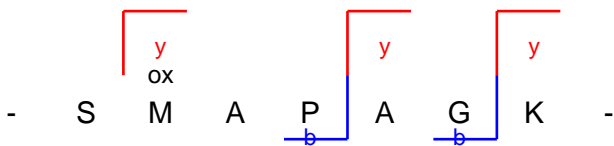

| Raw File                                | Scan  | Method    | Score | m/z    |
|-----------------------------------------|-------|-----------|-------|--------|
| RO-QC-160121_ZackD_SS_Set_01_Fraction_5 | 13541 | FTMS; HCD | 57.56 | 387.91 |

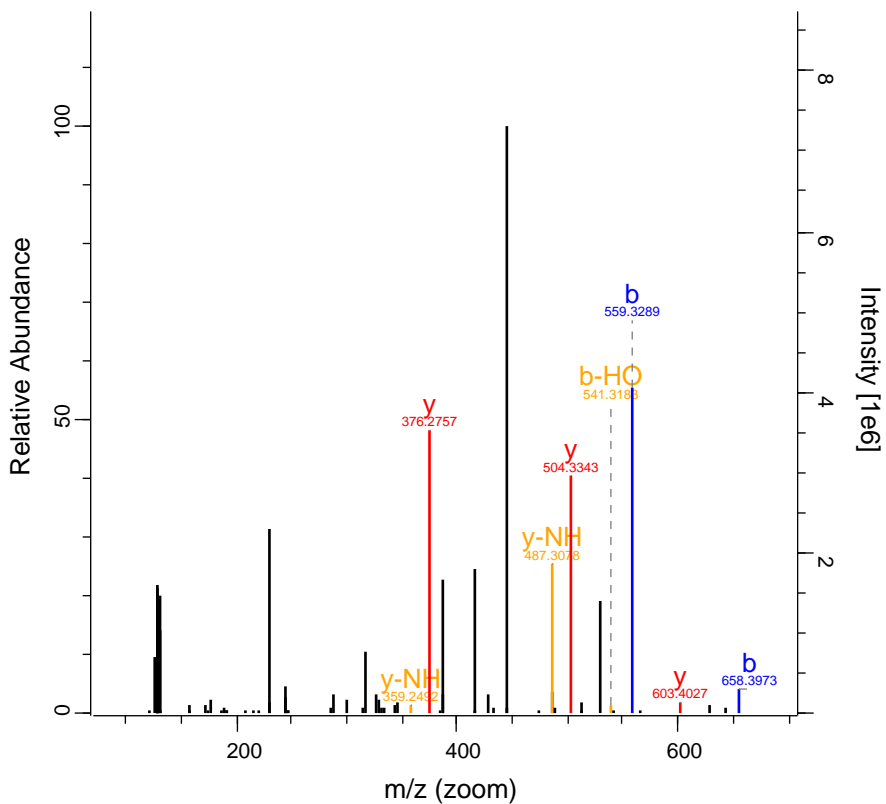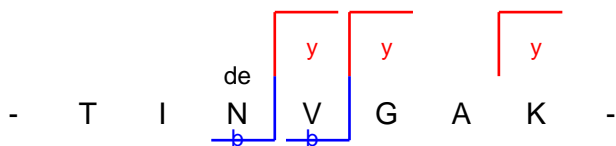

RO-QC-160121\_ZackD\_SS\_Set\_01\_Fraction 14902 FTMS; HC 84.24 687.92 FAM117A

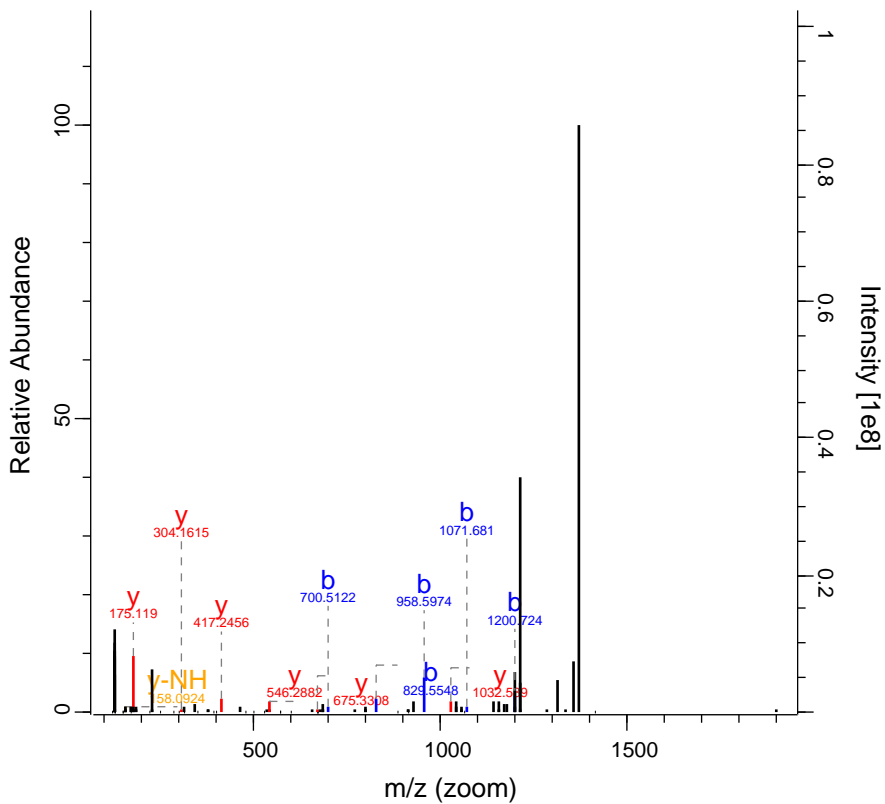

m/z (zoom)

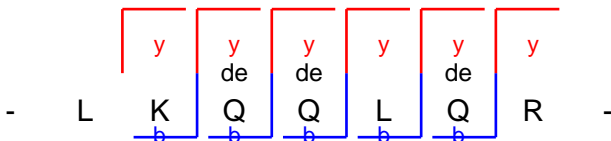

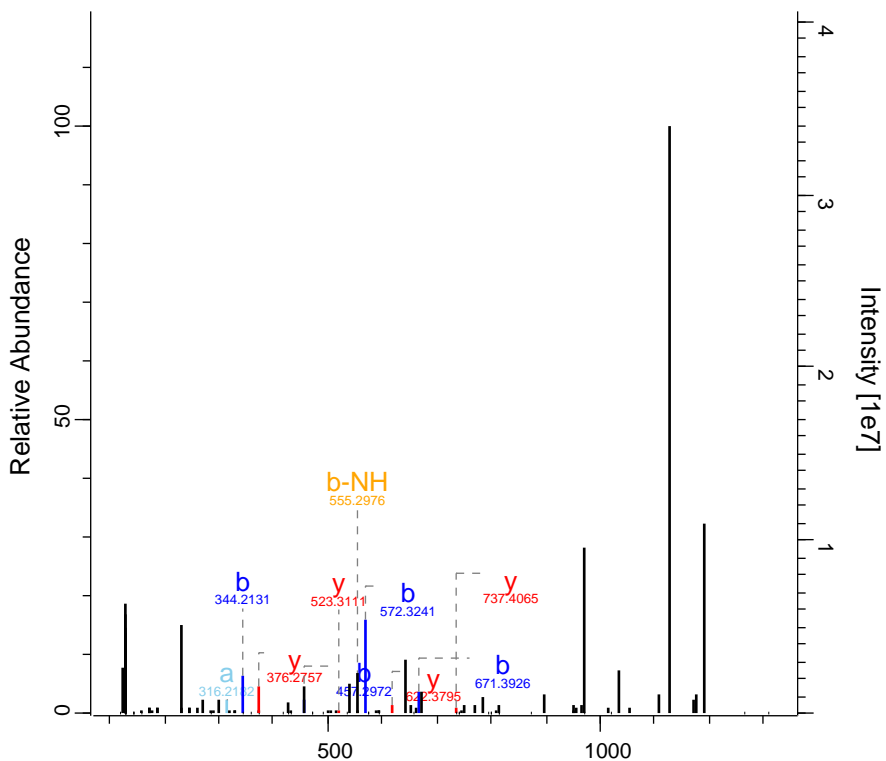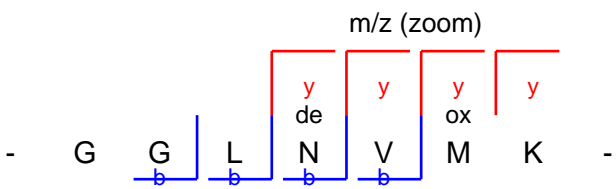

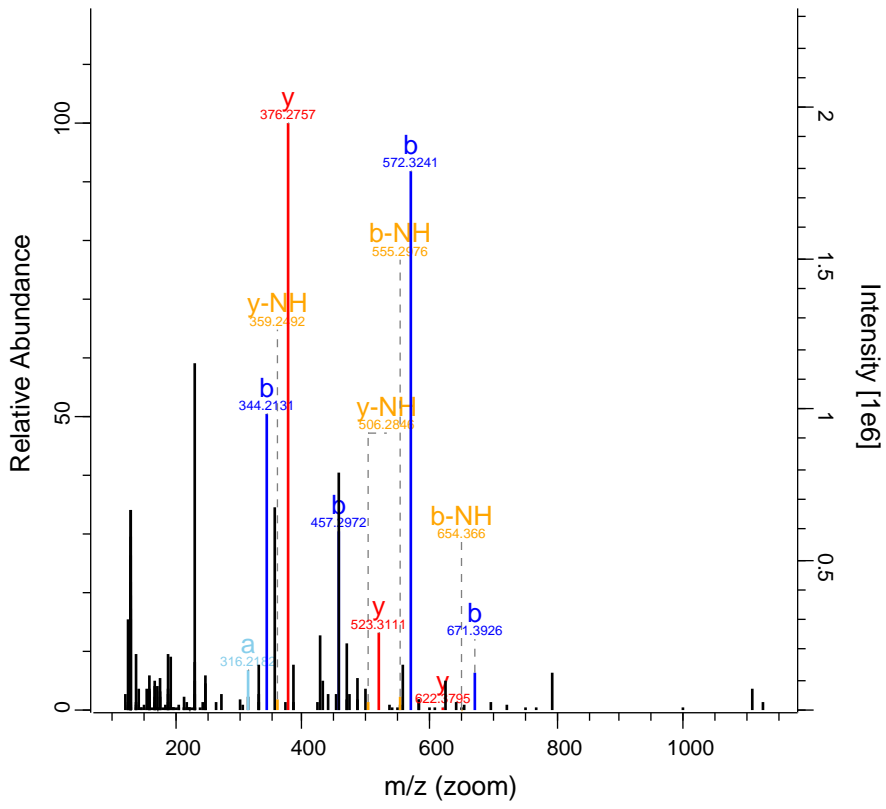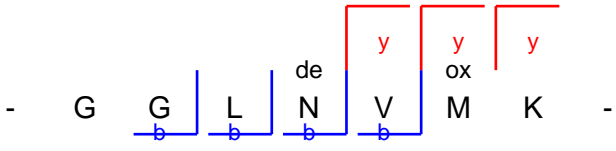

RO-QC-160121\_ZackD\_SS\_Set\_01\_Fraction 15923 FTMS; HC 85.21 824.47 AIPL1

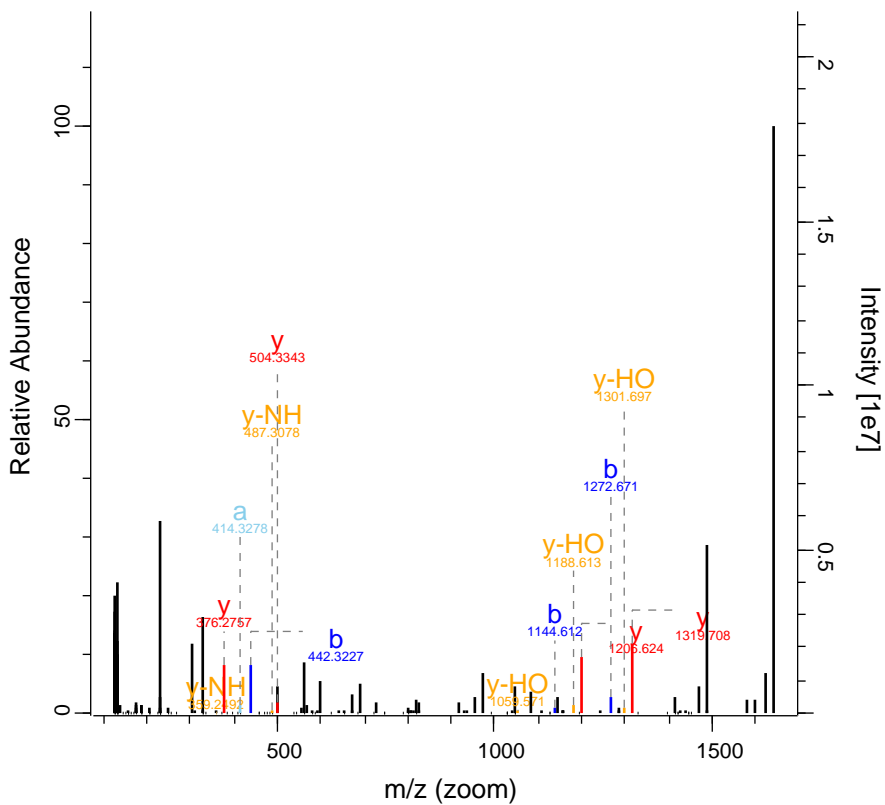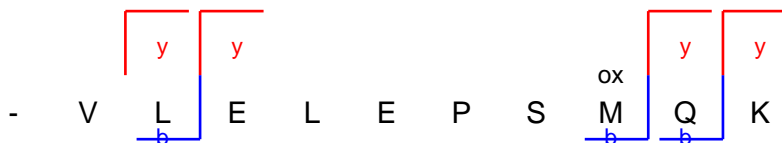

RO-QC-160121\_ZackD\_SS\_Set\_01\_Fraction 16534 FTMS; HC 60.4 663.57 TMEM8B

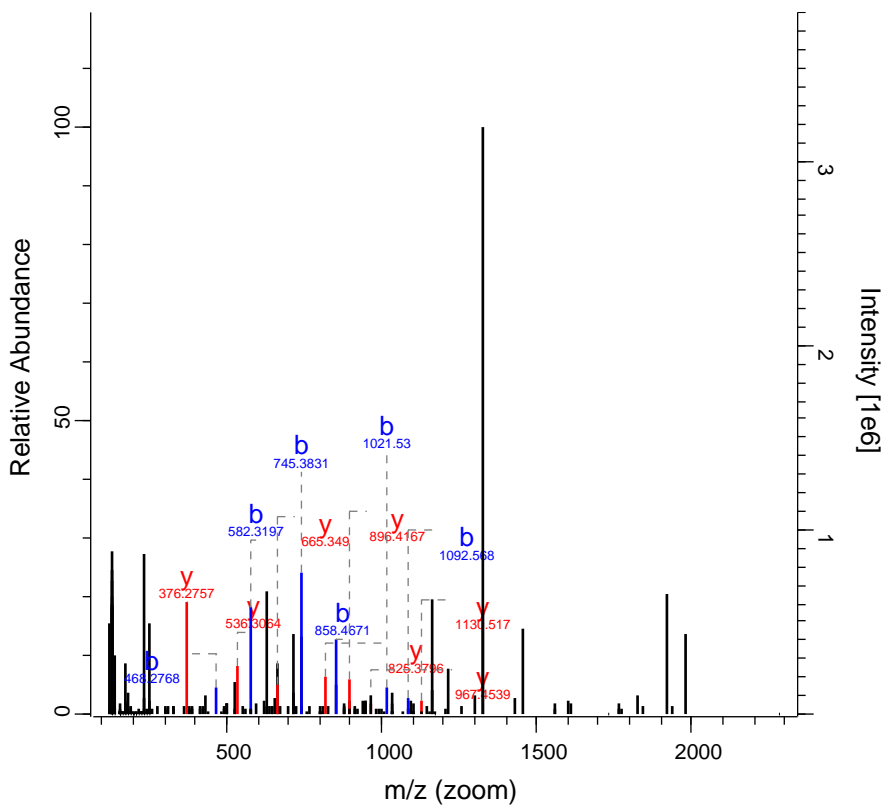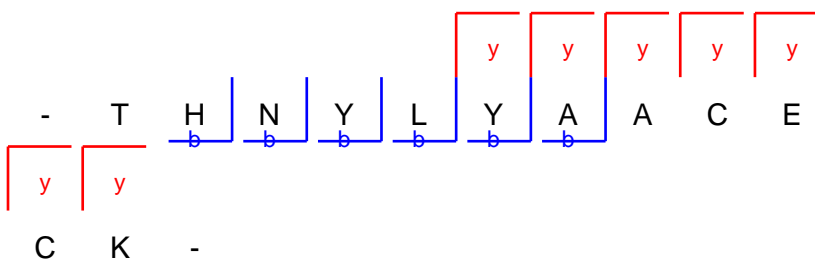

C K -



RO-QC-160121\_ZackD\_SS\_Set\_01\_Fractio 16575 FTMS; HC 143.61 836.49 CIZ1

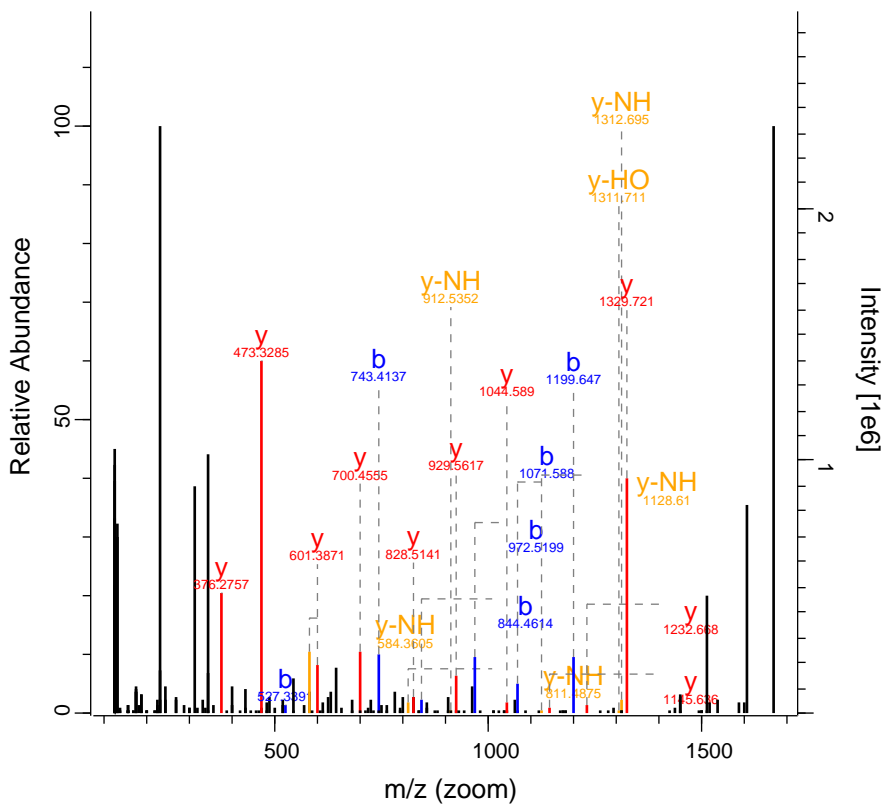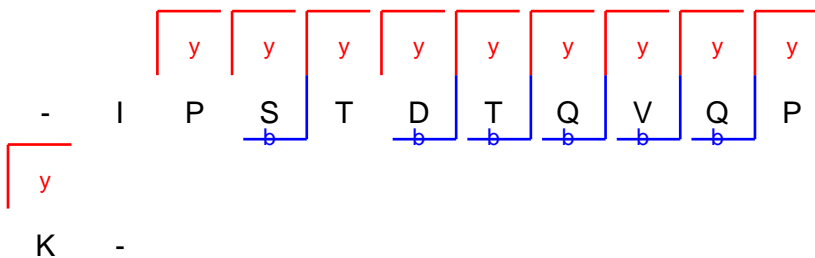



RO-QC-160121\_ZackD\_SS\_Set\_01\_Fractio 16626 FTMS; HC 143.01 697.88 NAA40

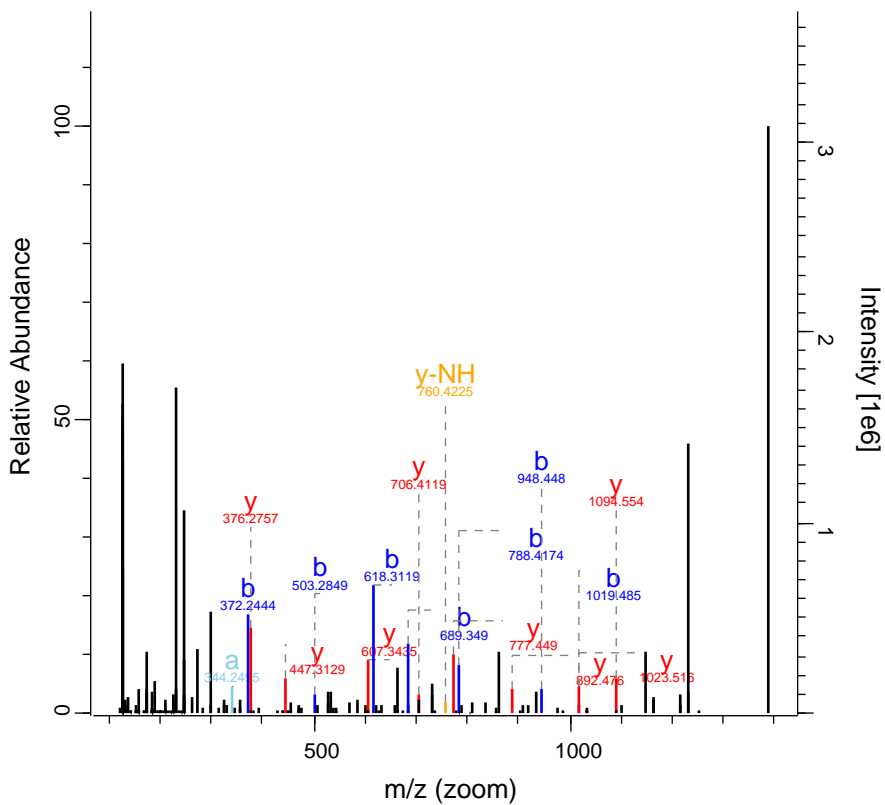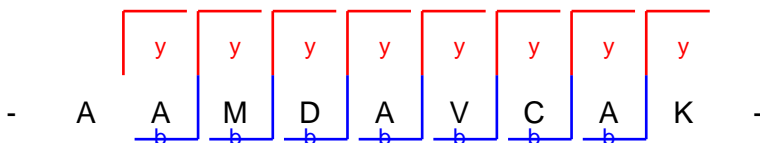

RO-QC-160121\_ZackD\_SS\_Set\_01\_Fraction16801 FTMS; HC 95.53 602.82 NPC1L1

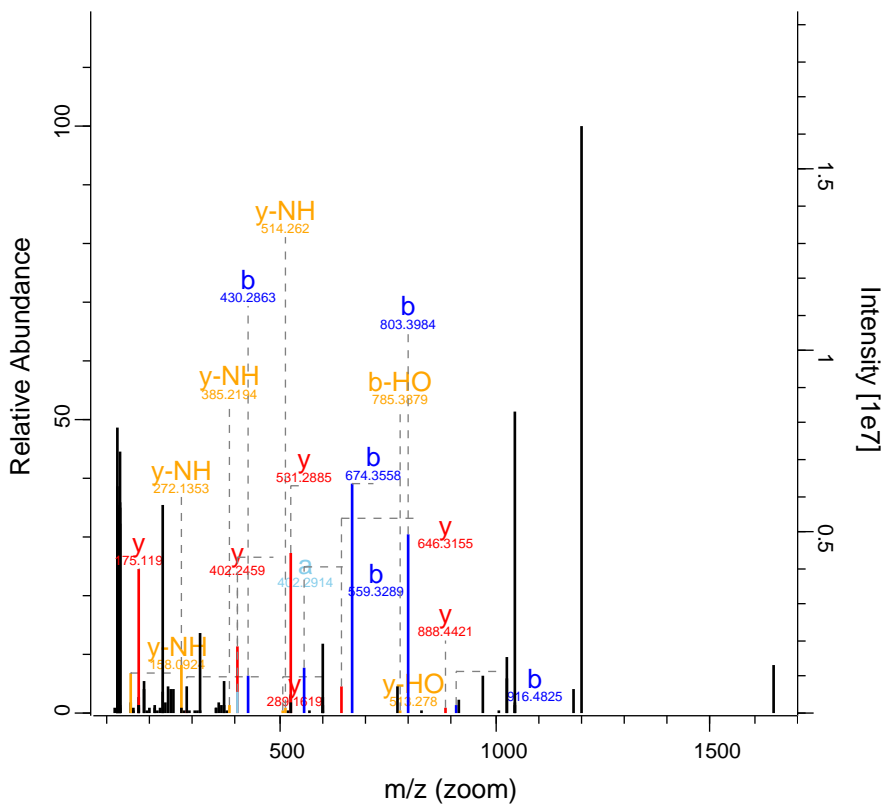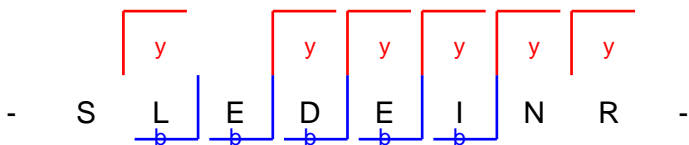

RO-QC-160121\_ZackD\_SS\_Set\_01\_Fraction 17048 FTMS; HC 63.49 602.82 NPC1L1

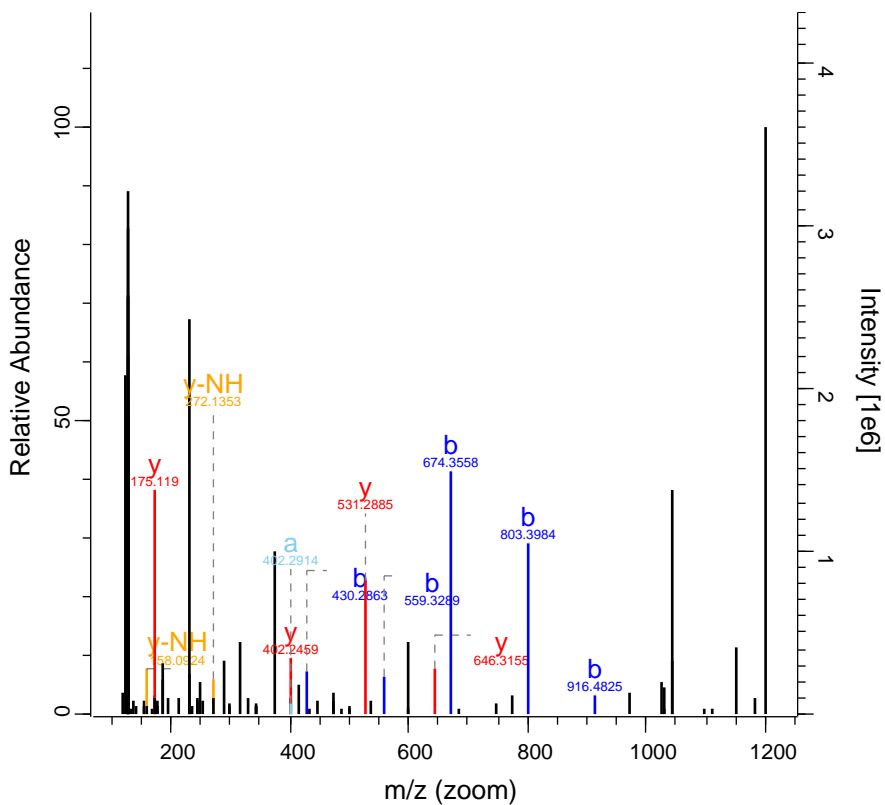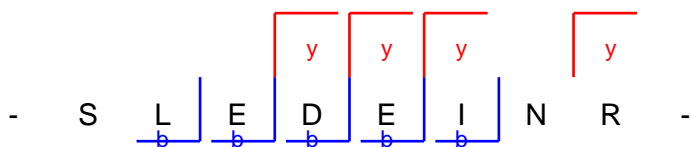

RO-QC-160121\_ZackD\_SS\_Set\_01\_Fractio 18112 FTMS; HC 107.09 611.37 SCOC

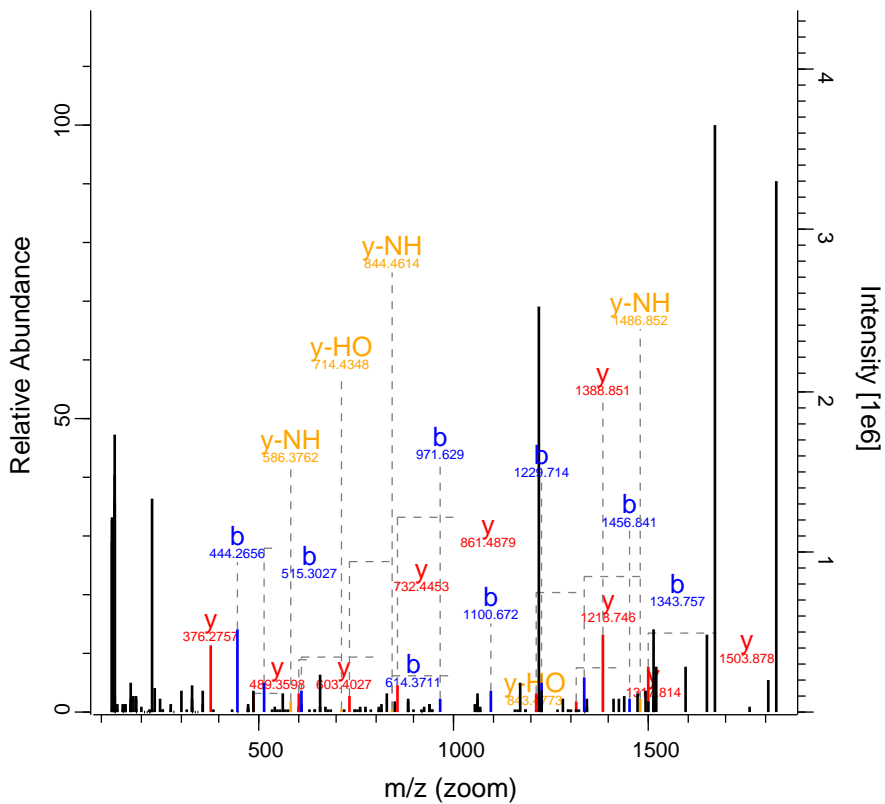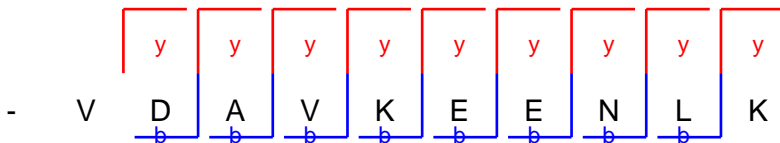

RO-QC-160121\_ZackD\_SS\_Set\_01\_Fraction 18794 FTMS; HC 85.53 713.94 SYS1

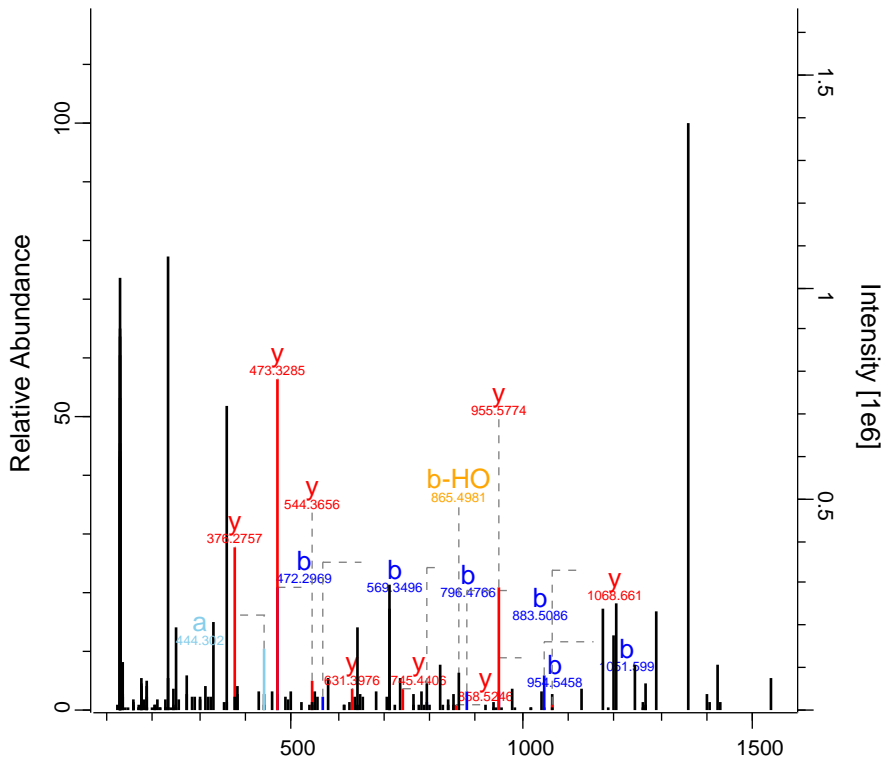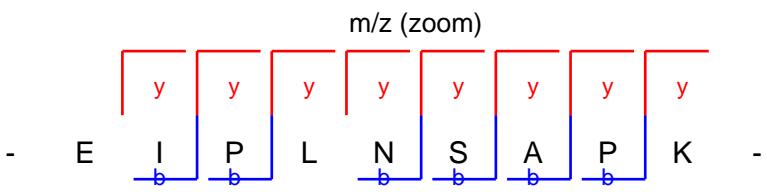

RO-QC-160121\_ZackD\_SS\_Set\_01\_Fractic 19103 FTMS; HC 45.66 1173.57 LRRC28

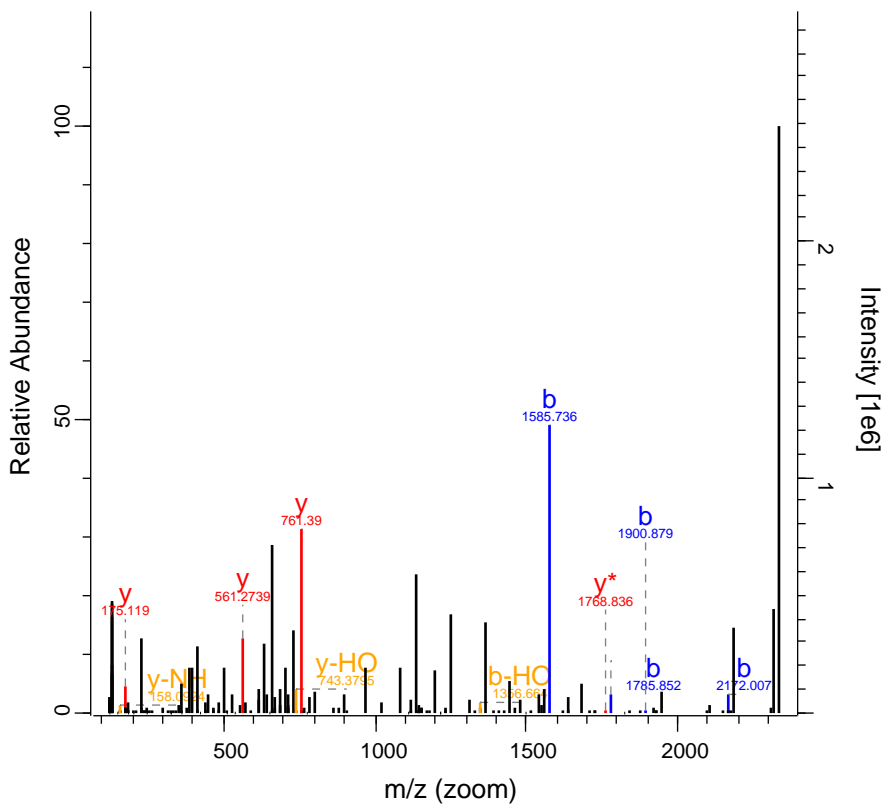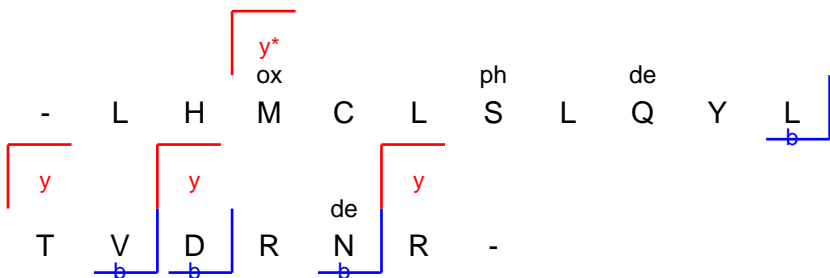



Raw File

Scan Method Score m/z

RO-QC-160121\_ZackD\_SS\_Set\_01\_Fraction\_5

19469 FTMS; HCD 64.44 1095.62

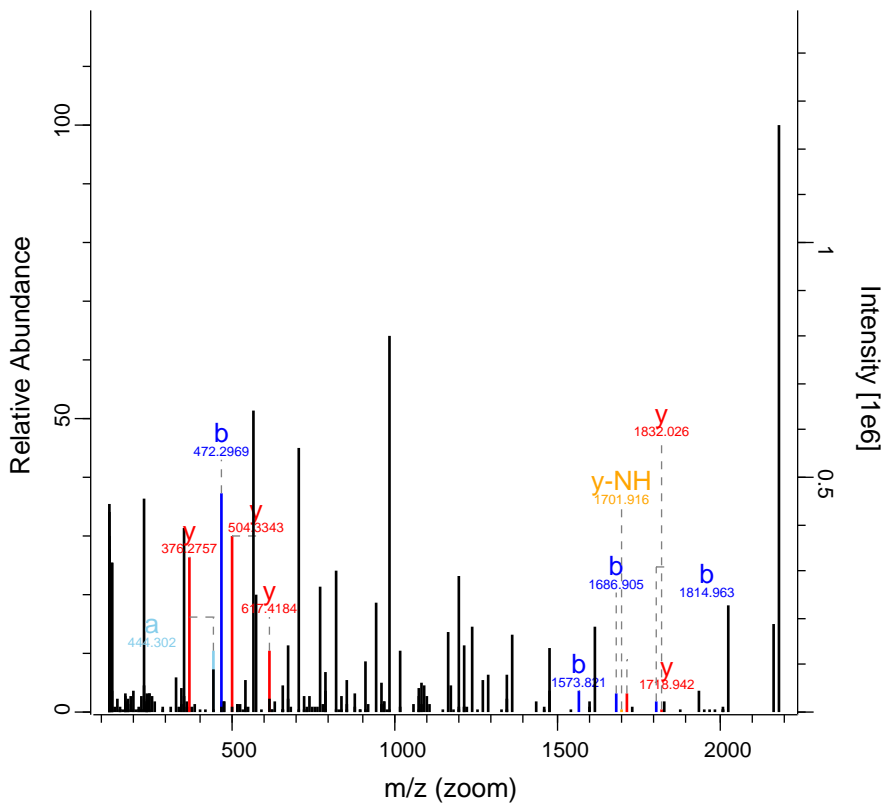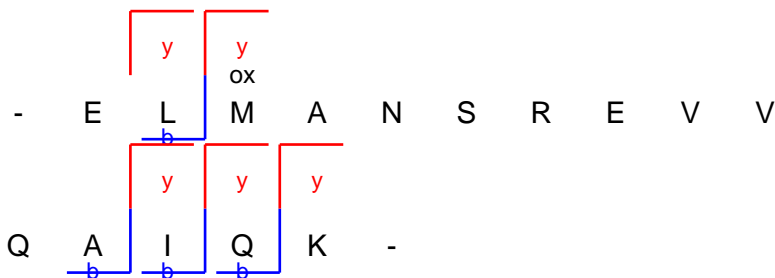

RO-QC-160121\_ZackD\_SS\_Set\_01\_Fraction 20287 FTMS; HC 44.58 600.07 ATP6V0C

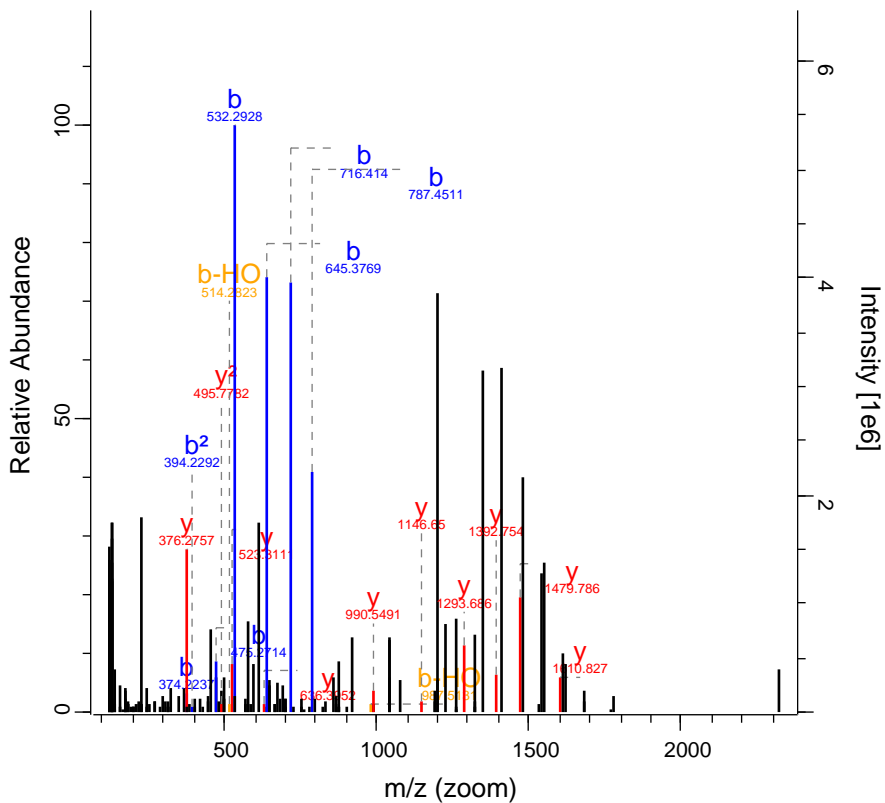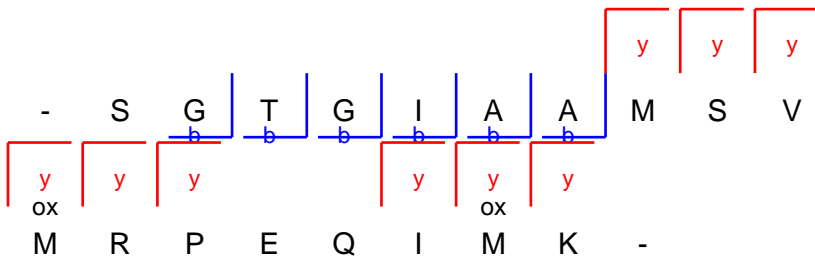

RO-QC-160121\_ZackD\_SS\_Set\_01\_Fraction 20831 FTMS; HC 66.06 1235.1 HELT

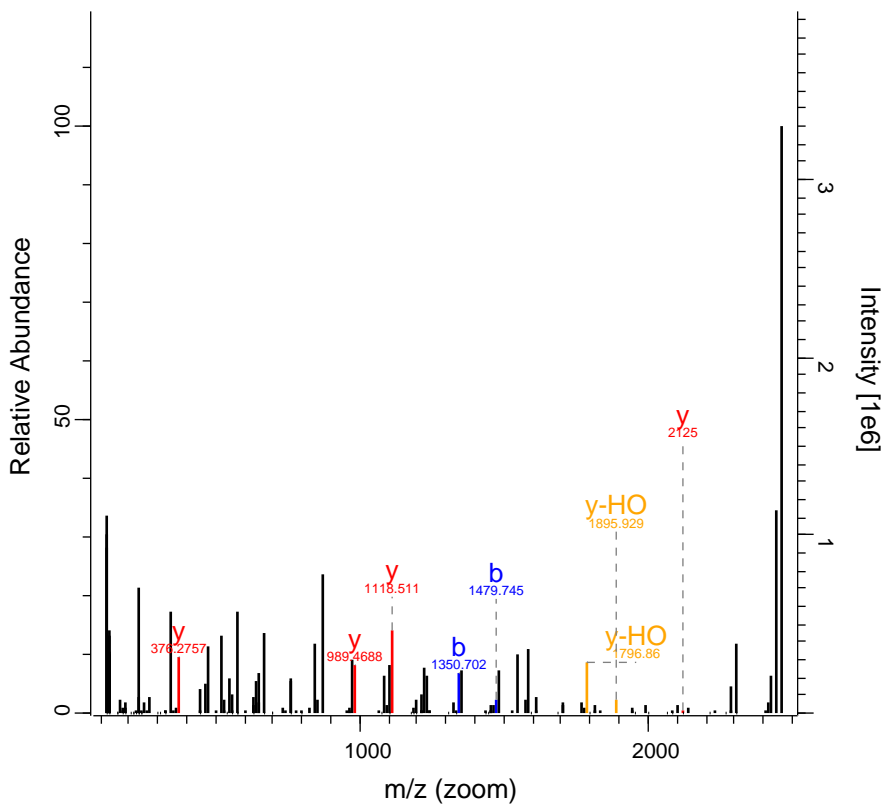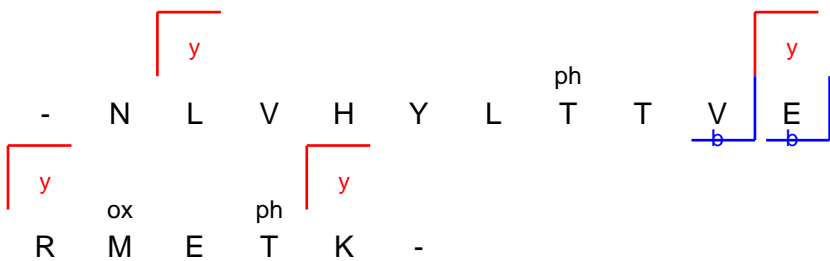

RO-QC-160121\_ZackD\_SS\_Set\_01\_Fraction 20872 FTMS; HC 47.07 689.86 CNKSR1

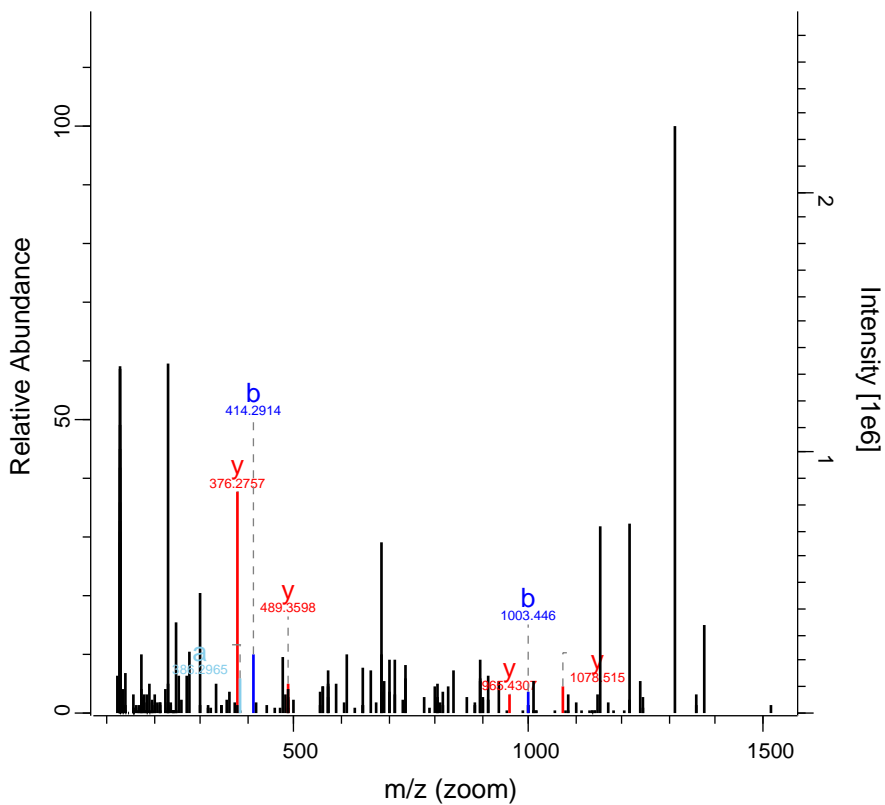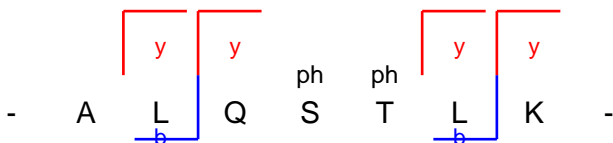

RO-QC-160121\_ZackD\_SS\_Set\_01\_Fraction 21184 FTMS; HC 43 471.91 NKPD1

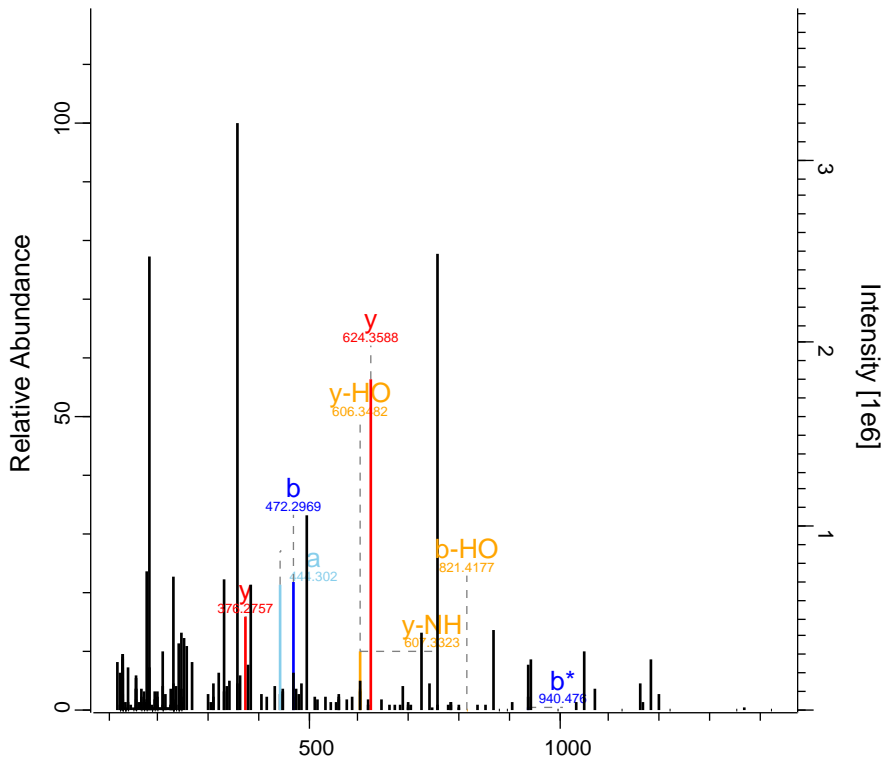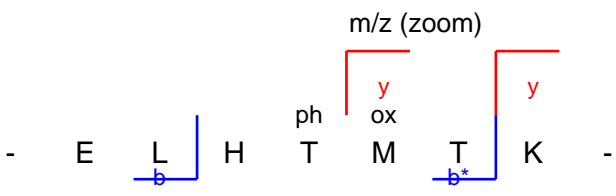

RO-QC-160121\_ZackD\_SS\_Set\_01\_Fraction 21676 FTMS; HC 49.31 487.78 HPDL

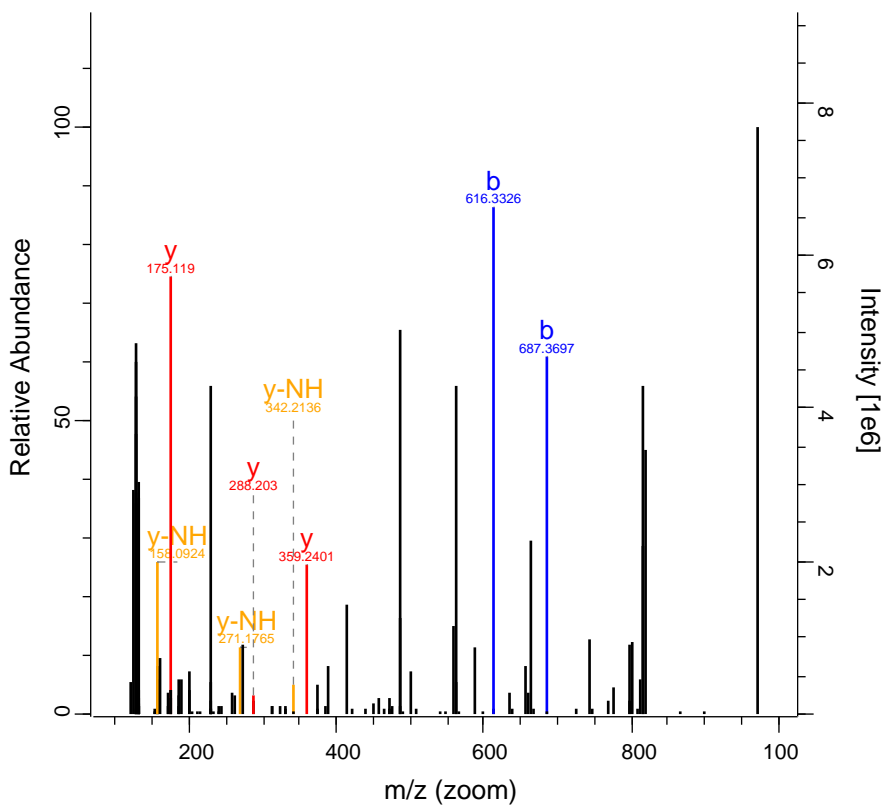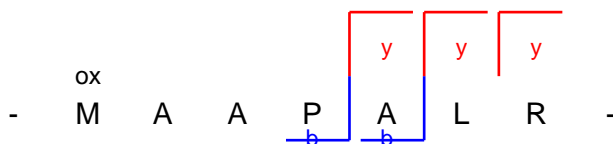

RO-QC-160121\_ZackD\_SS\_Set\_01\_Fractio 22116 FTMS; HC 119.68 818.44 GPATCH2

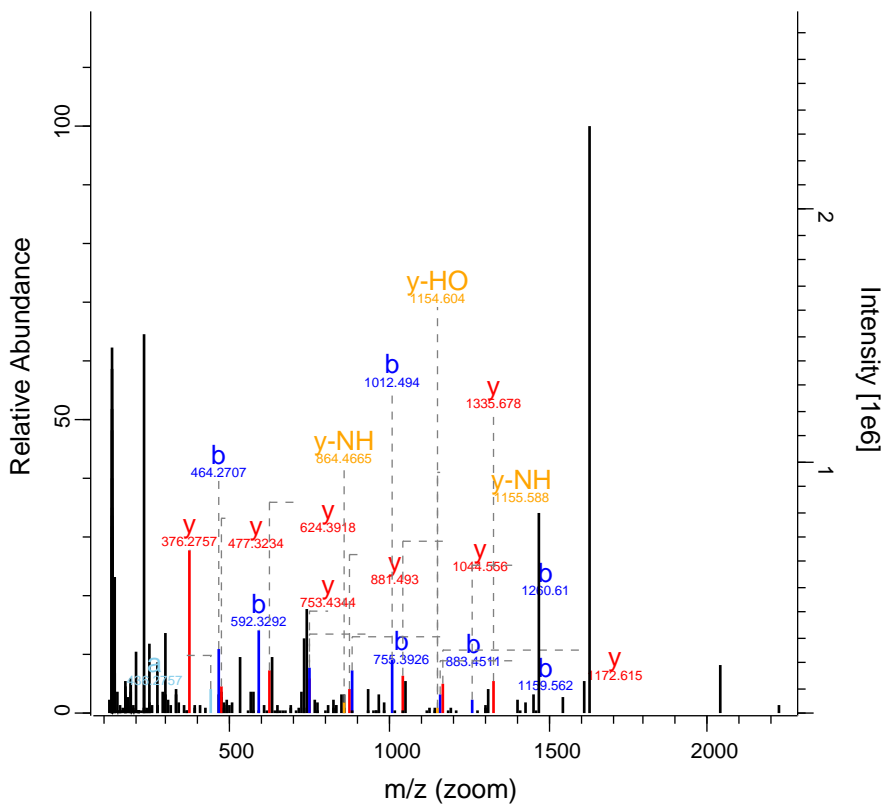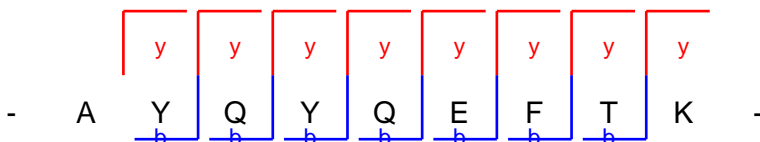

RO-QC-160121\_ZackD\_SS\_Set\_01\_Fraction 22630 FTMS; HC 62.63 883.49 SEC22A

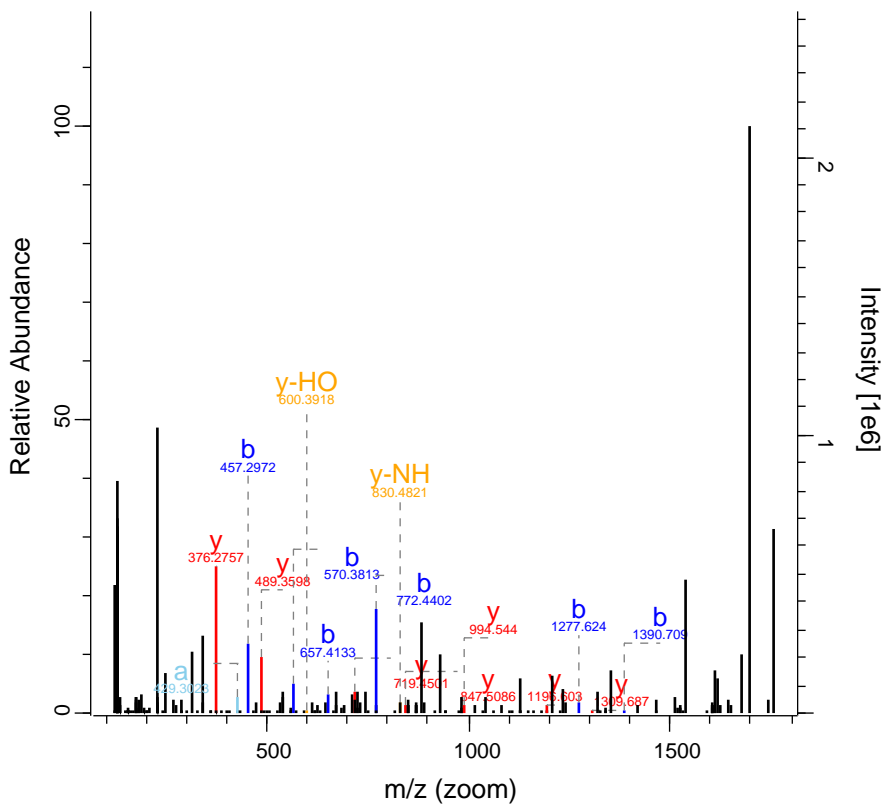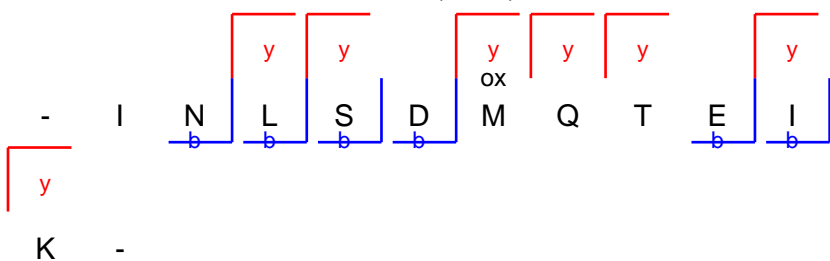

K





RO-QC-160121\_ZackD\_SS\_Set\_01\_Fractic 23482 FTMS; HC 147.96 1191.14 ATP6V0C

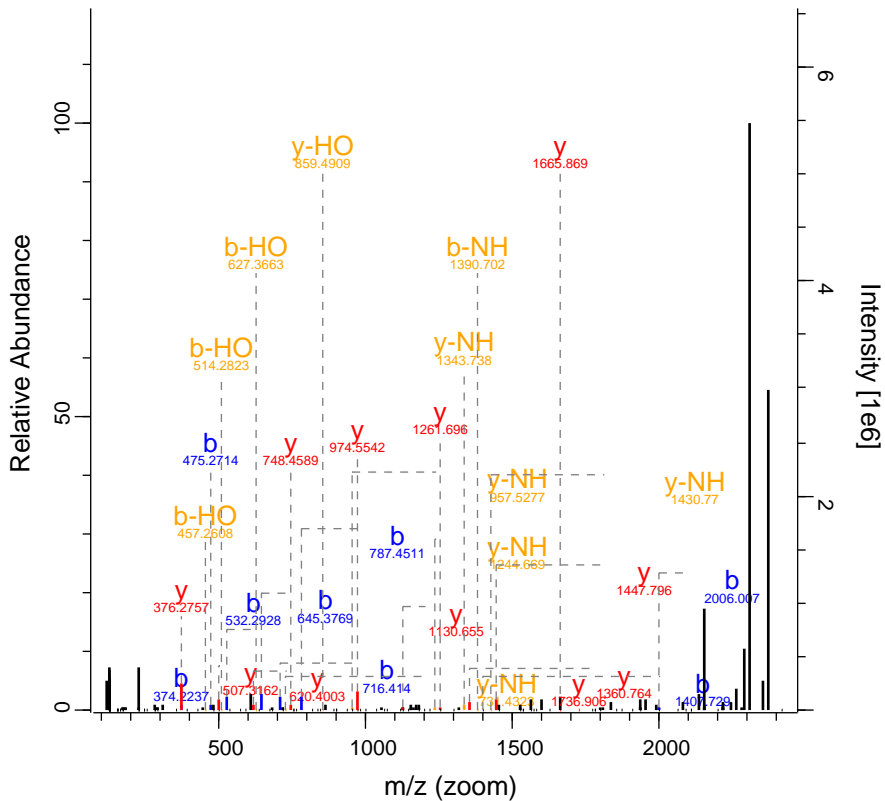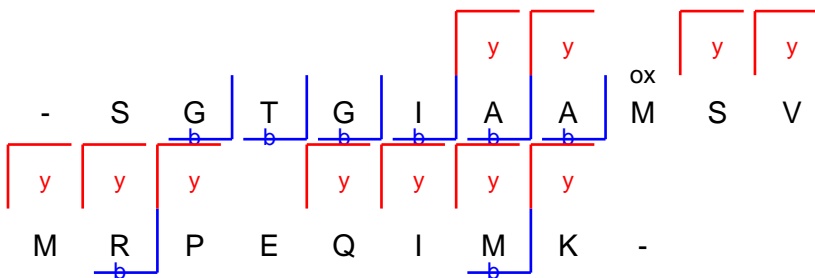

RO-QC-160121\_ZackD\_SS\_Set\_01\_Fraction 23487 FTMS; HC 64.7 825.11 TMEM243

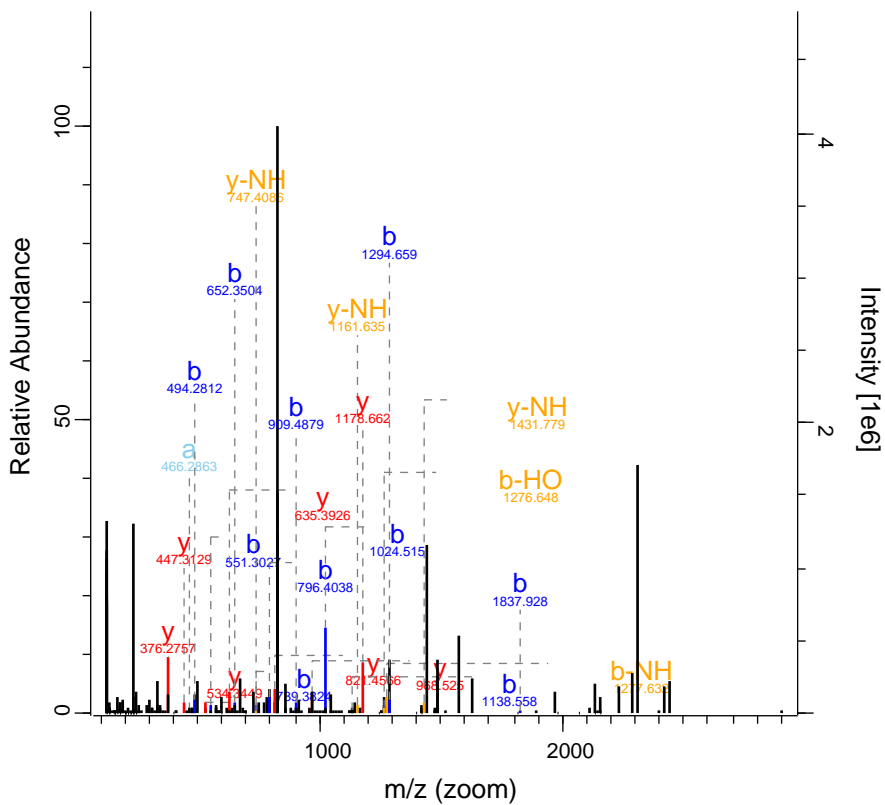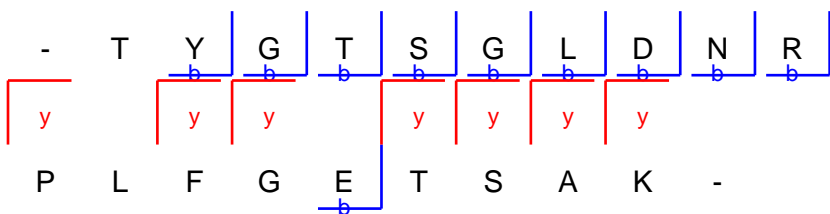



RO-QC-160121\_ZackD\_SS\_Set\_01\_Fractio 23622 FTMS; HC 117.81 600.86 TMEM167A

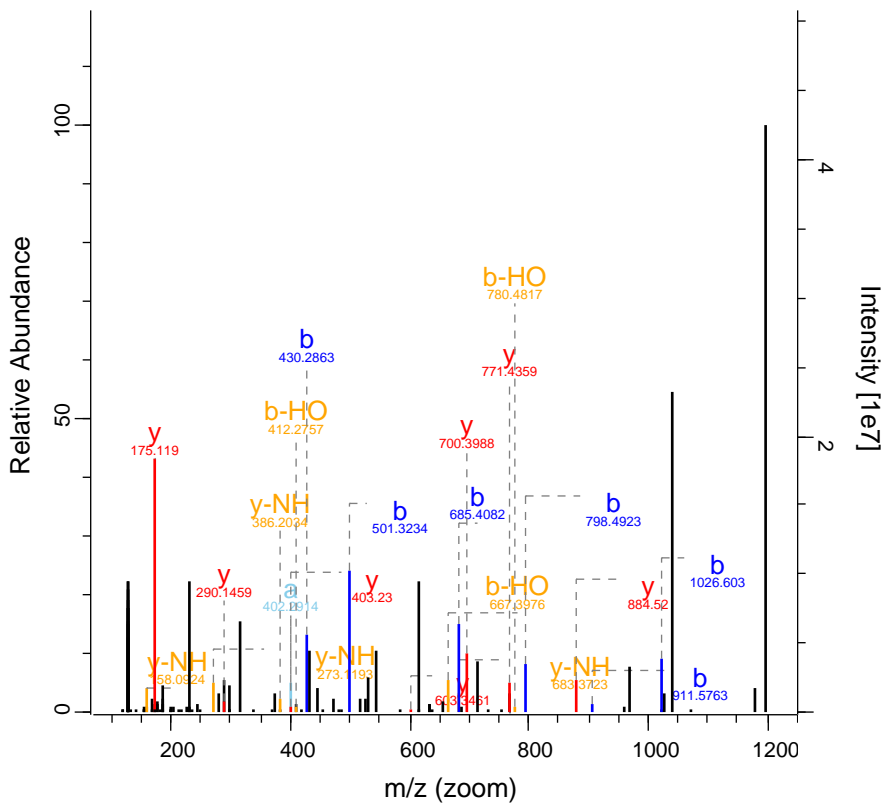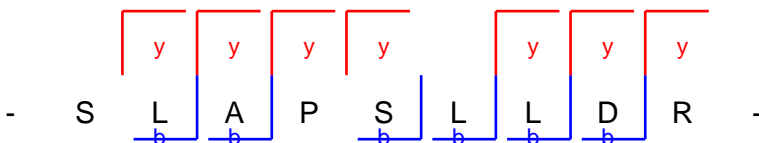

RO-QC-160121\_ZackD\_SS\_Set\_01\_Fractio 24368 FTMS; HC 156.35 722.45 ARL4C

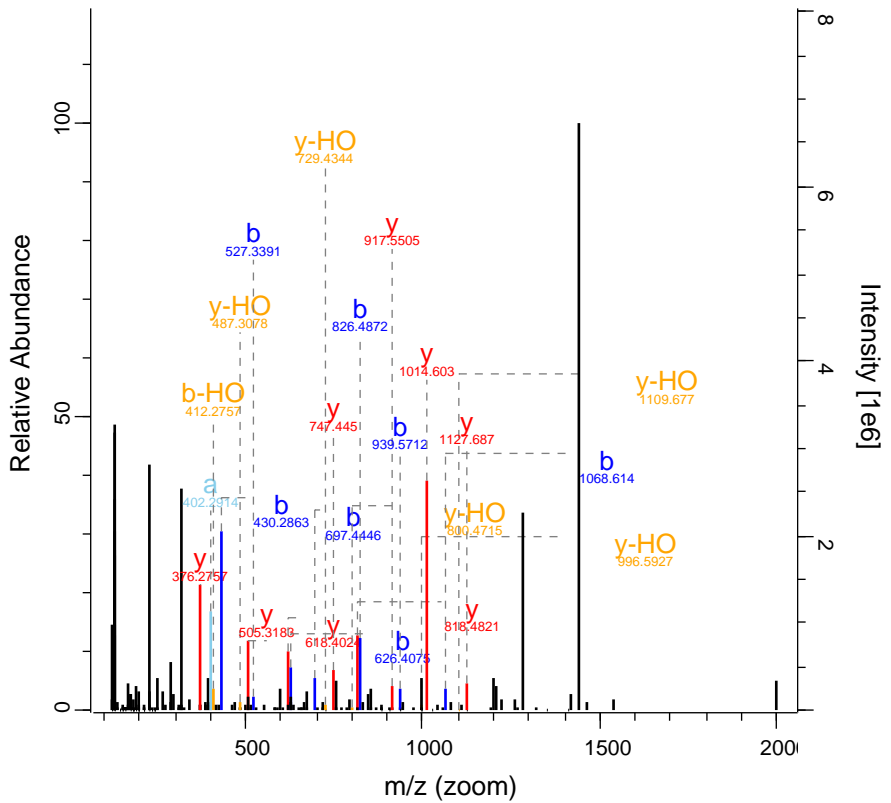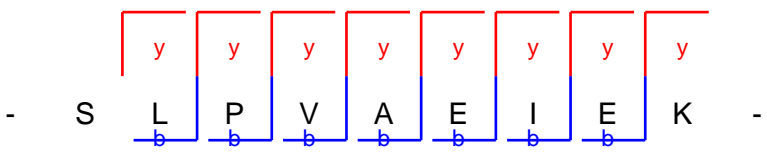

RO-QC-160121\_ZackD\_SS\_Set\_01\_Fractic 25299 FTMS; HC 230.26 1124.54 RHBD1

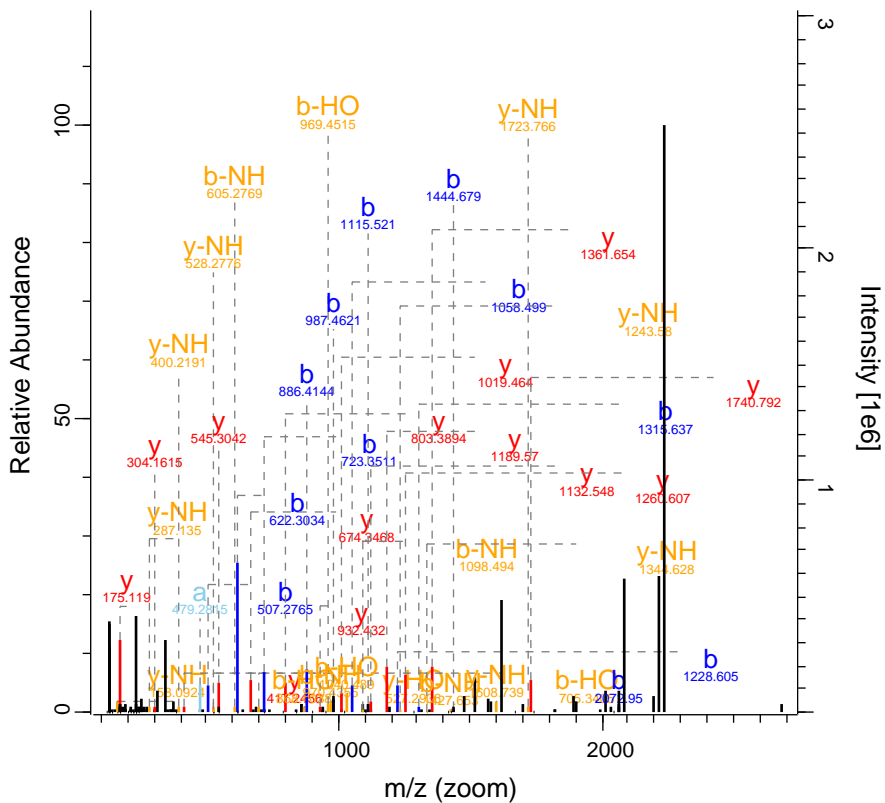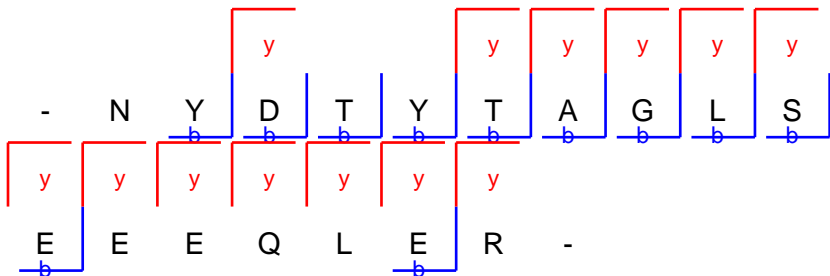





RO-QC-160121\_ZackD\_SS\_Set\_01\_Fraction 25719 FTMS; HC 48.28 511.96 ASB7

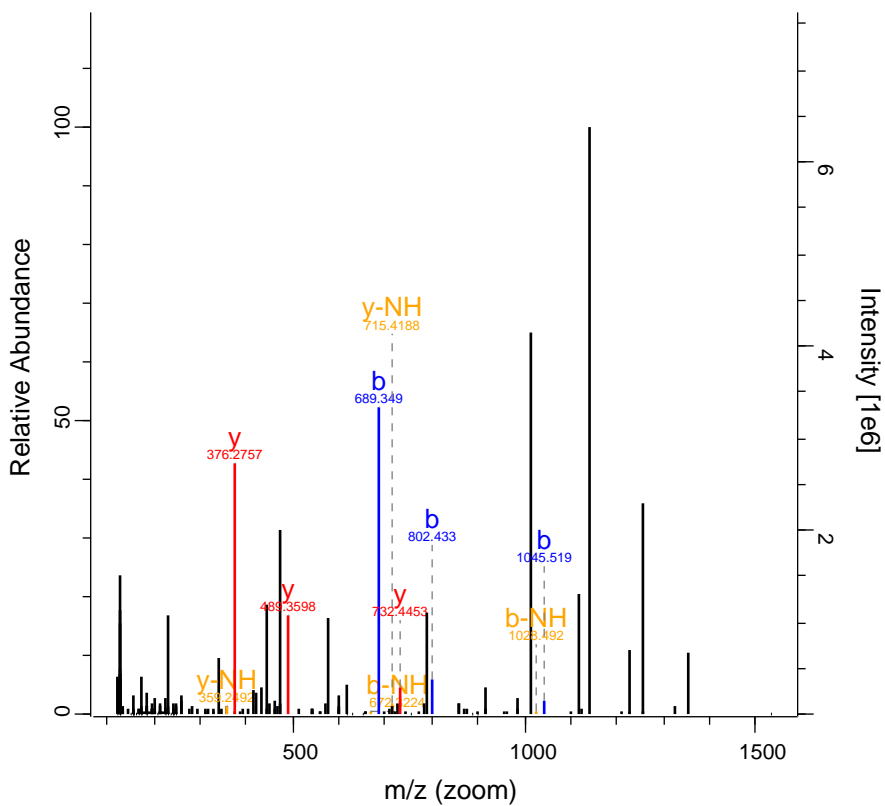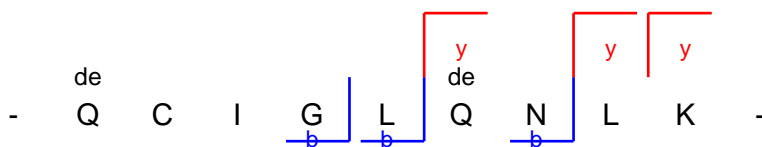

RO-QC-160121\_ZackD\_SS\_Set\_01\_Fractio 26235 FTMS; HC 122.66 955.03 MPV17L2

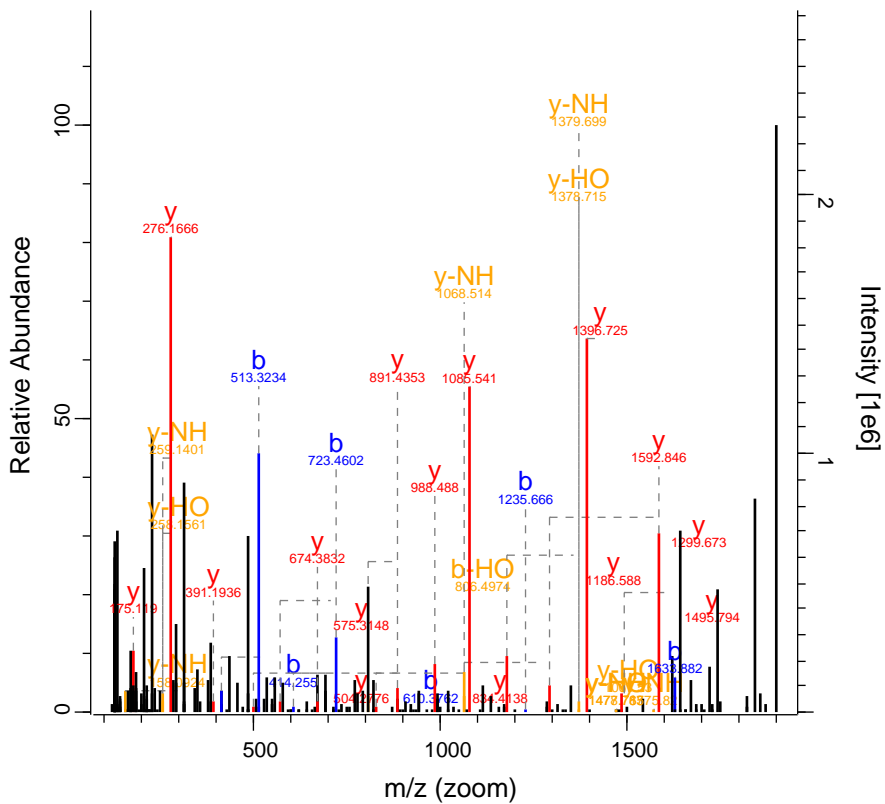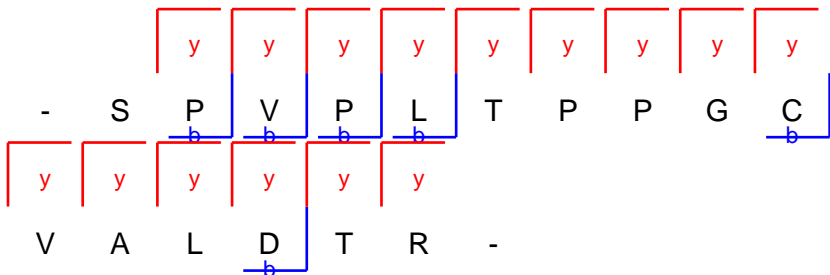



RO-QC-160121\_ZackD\_SS\_Set\_01\_Fraction 26881 FTMS; HC 61.84 717.44 AIM2

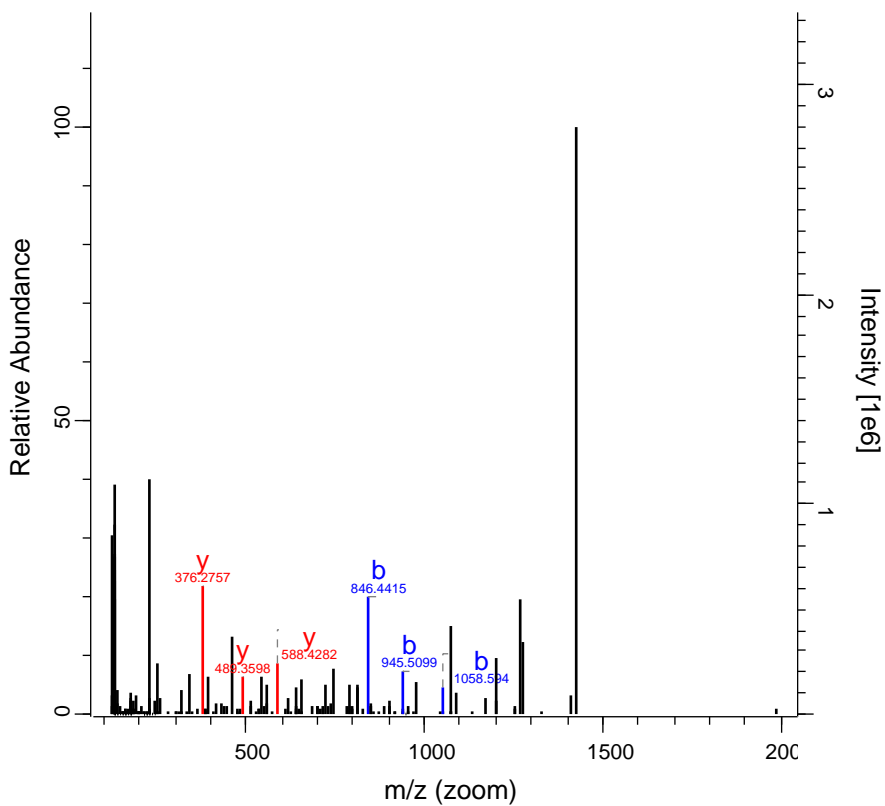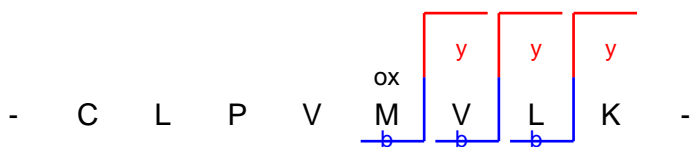

RO-QC-160121\_ZackD\_SS\_Set\_01\_Fraction 27542 FTMS; HCl 45.33 801.8 RASSF3

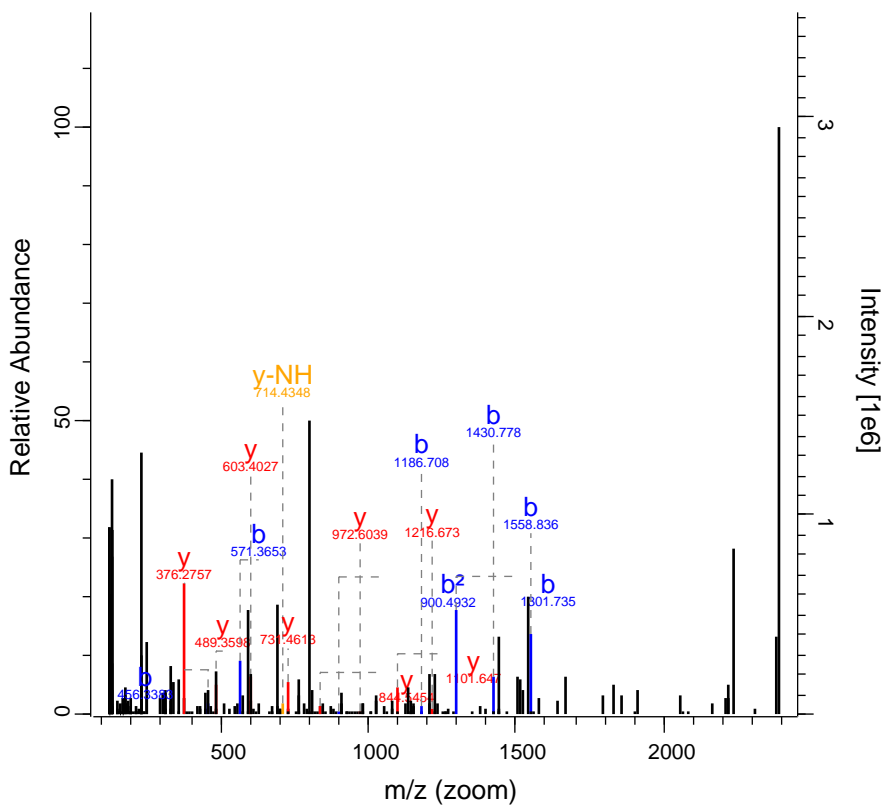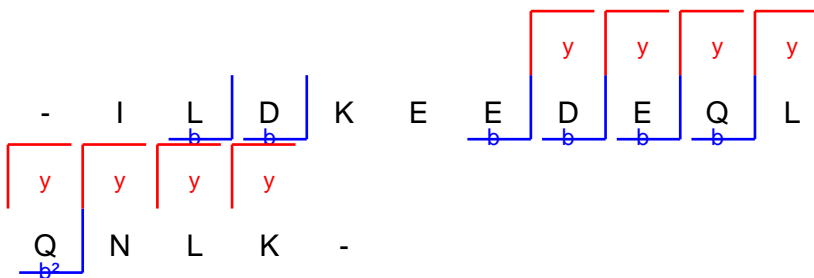

RO-QC-160121\_ZackD\_SS\_Set\_01\_Fraction 28220 FTMS; HC 77.6 494.63 GATC

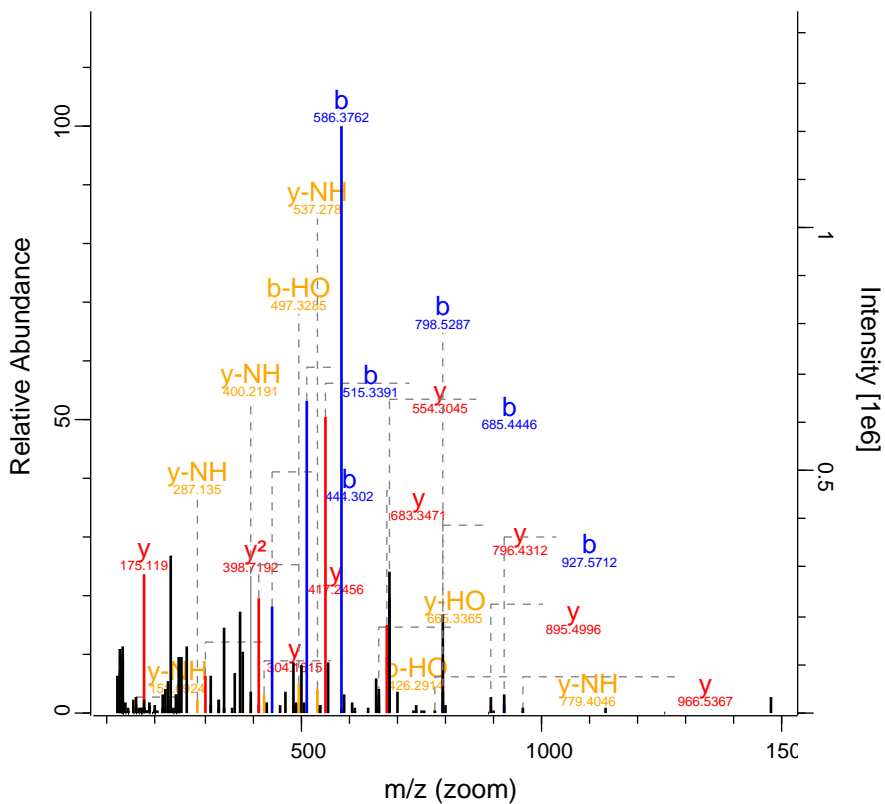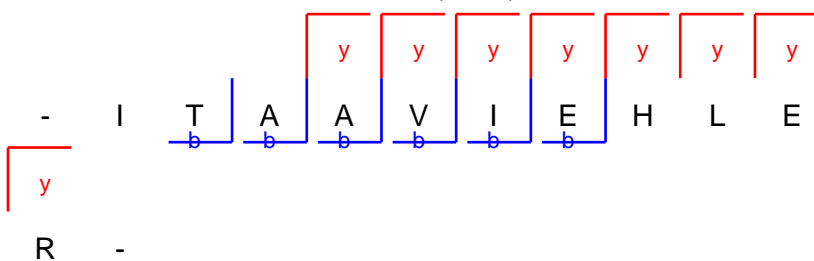

RO-QC-160121\_ZackD\_SS\_Set\_01\_Fraction 28519 FTMS; HC 60.03 819.42 HN1

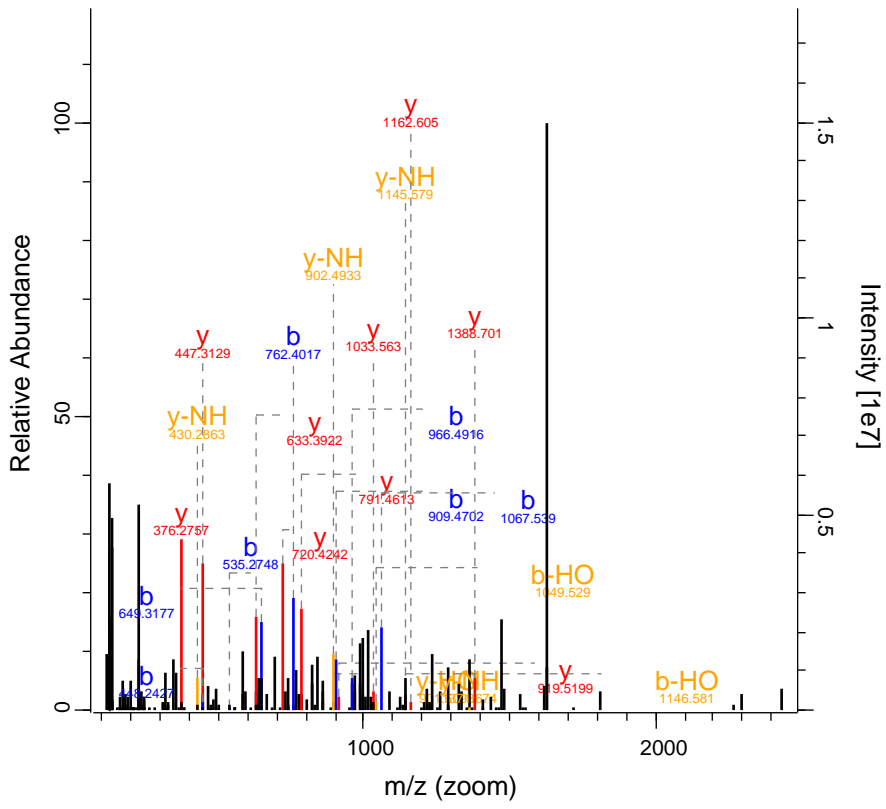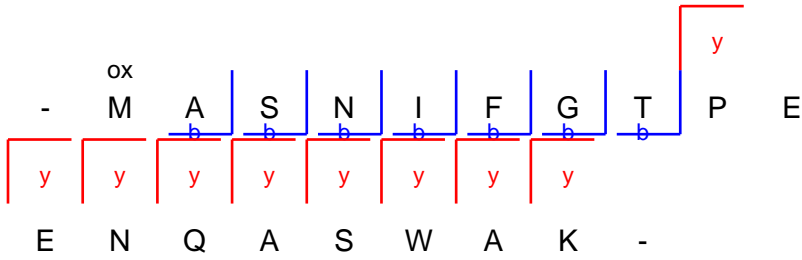

RO-QC-160121\_ZackD\_SS\_Set\_01\_Fractic 28579 FTMS; HC 132.24 1228.62 HN1

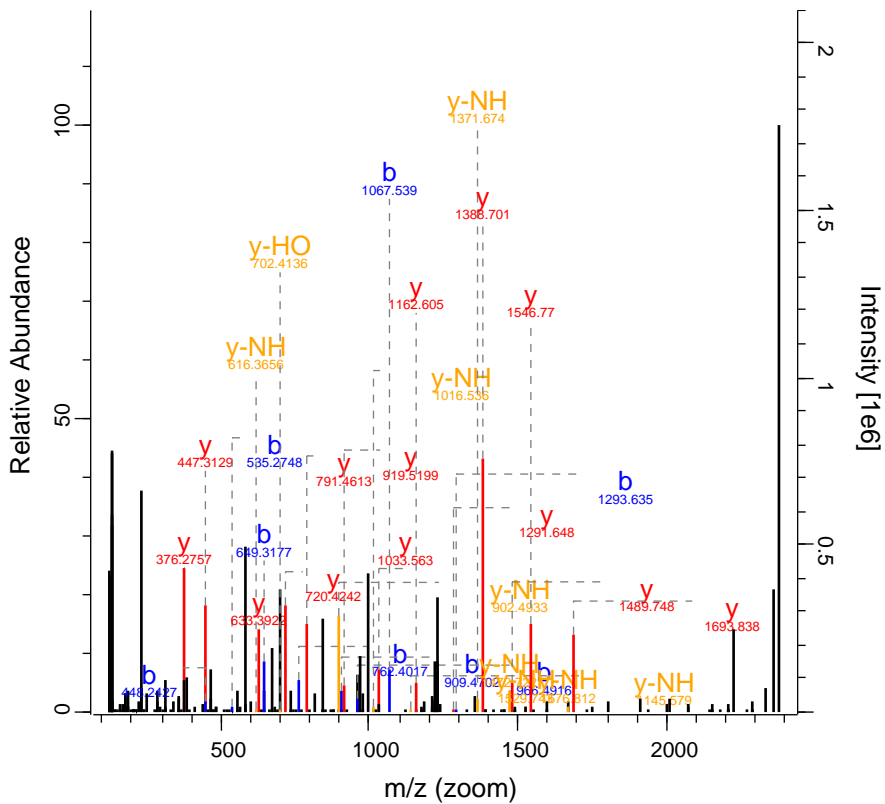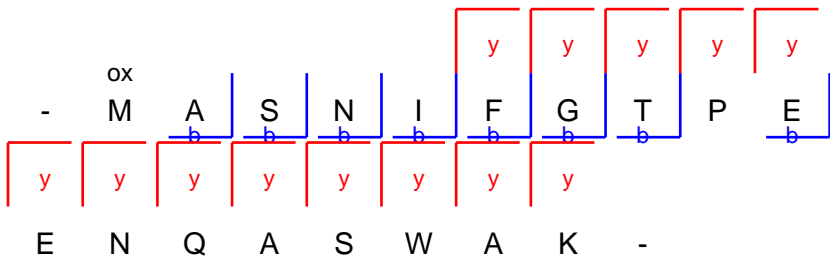



RO-QC-160121\_ZackD\_SS\_Set\_01\_Fraction28770 FTMS; HC 41.22 594.99 IFI44

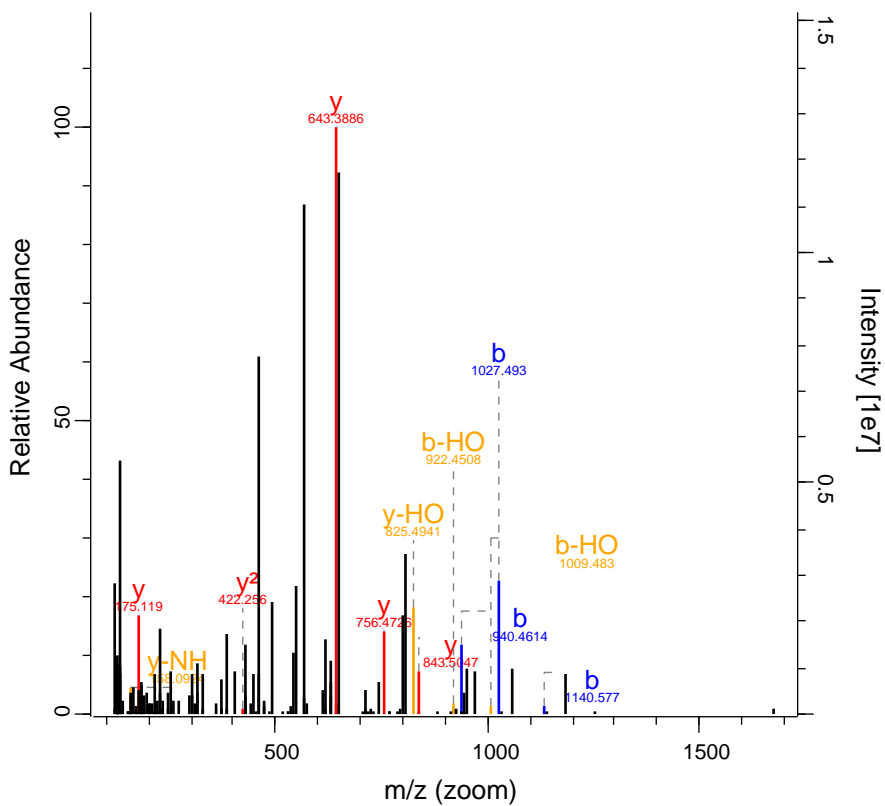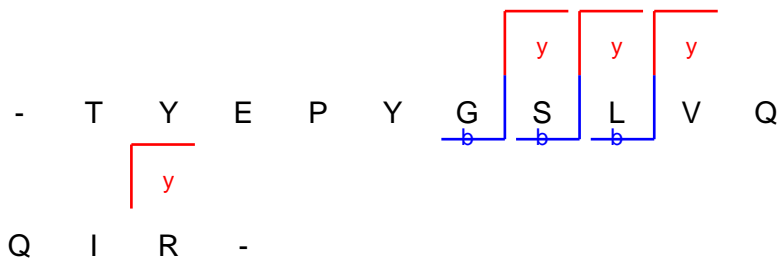



RO-QC-160121\_ZackD\_SS\_Set\_01\_Fraction 29808 FTMS; HC 174.2 983.85 C1GALT1C1

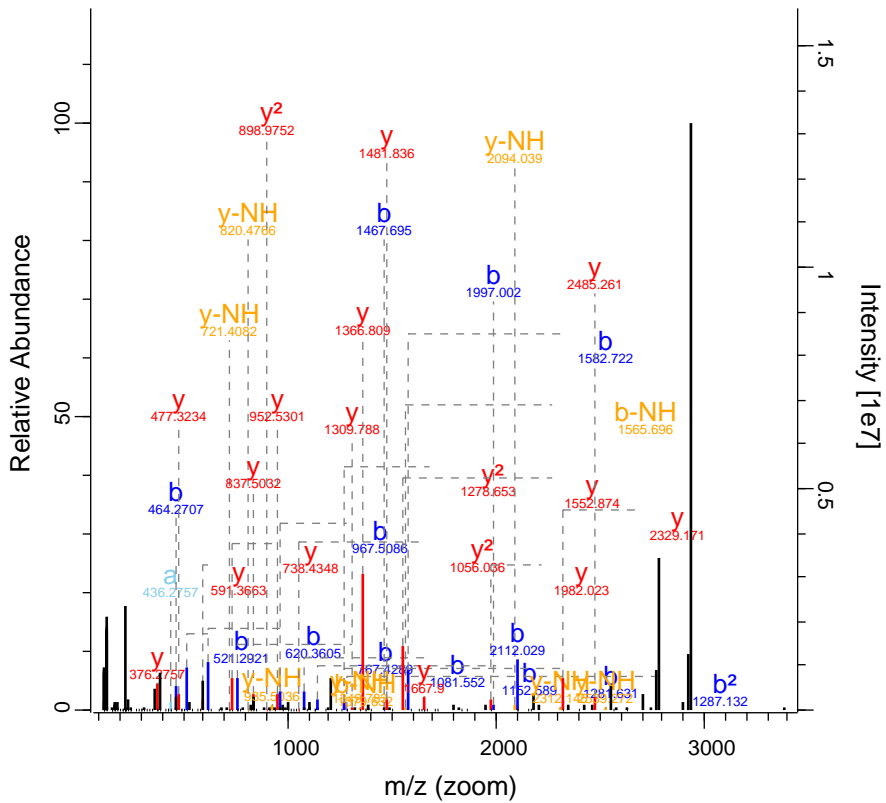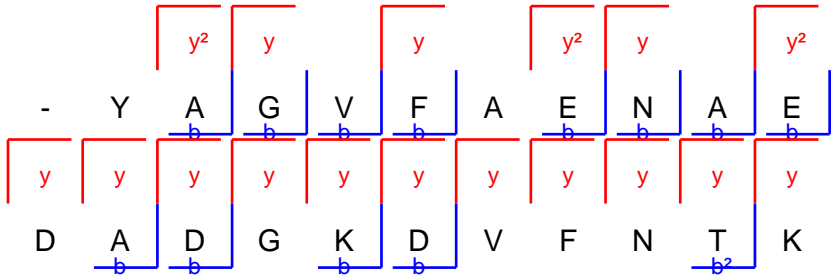

RO-QC-160121\_ZackD\_SS\_Set\_01\_Fraction 29886 FTMS; HC 79.16 644.38 DNLZ

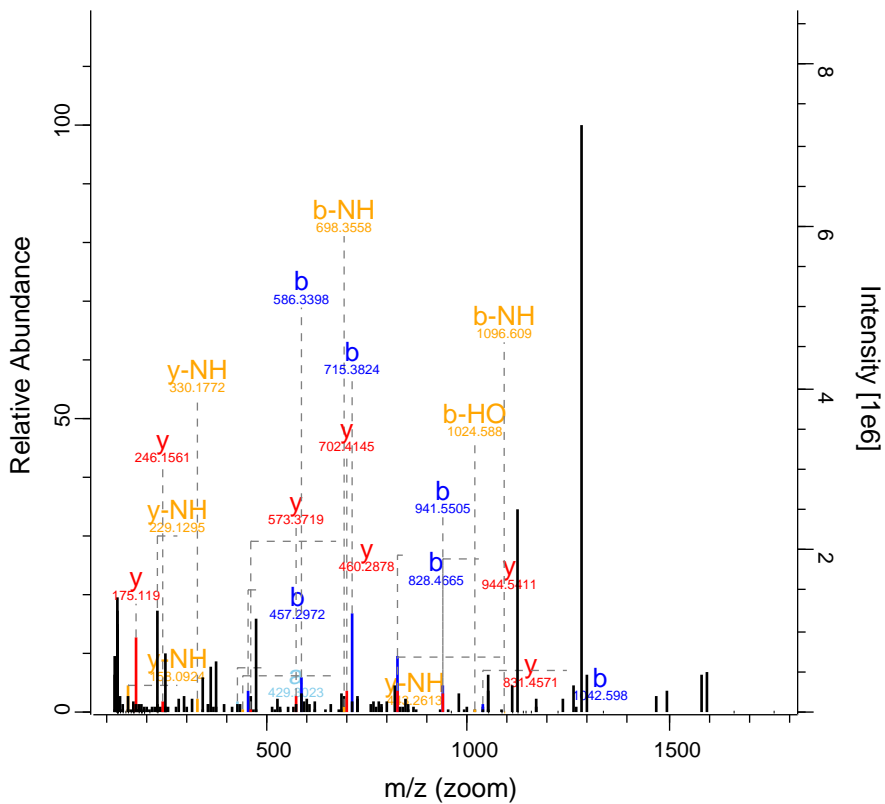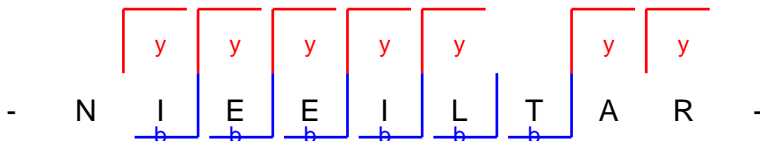

RO-QC-160121\_ZackD\_SS\_Set\_01\_Fractio 30451 FTMS; HC 168.43 998.06 B3GALNT1

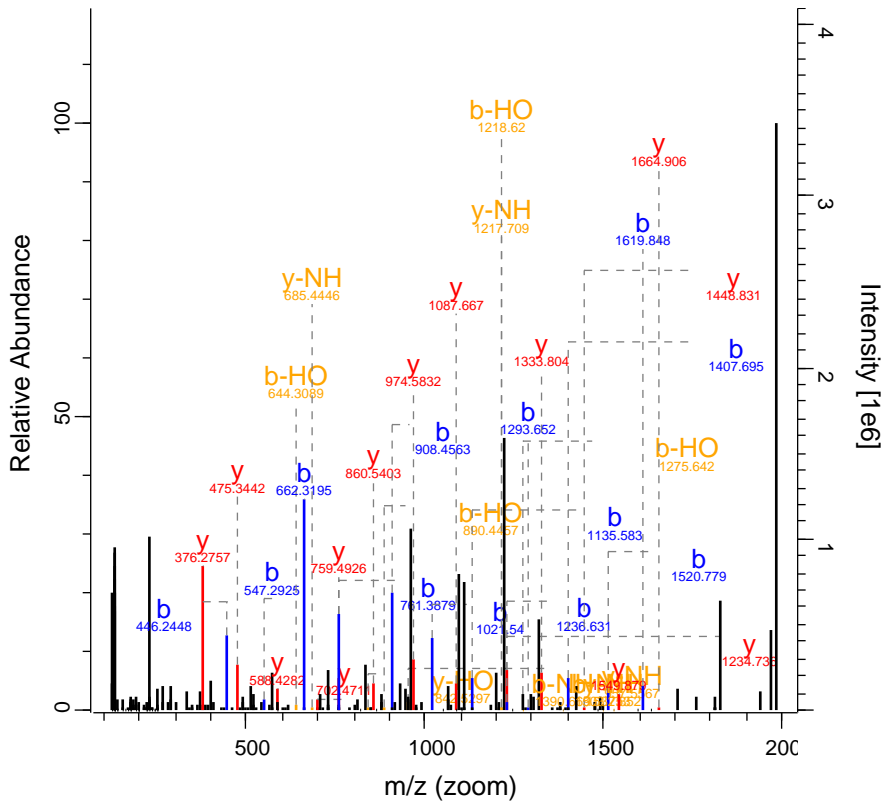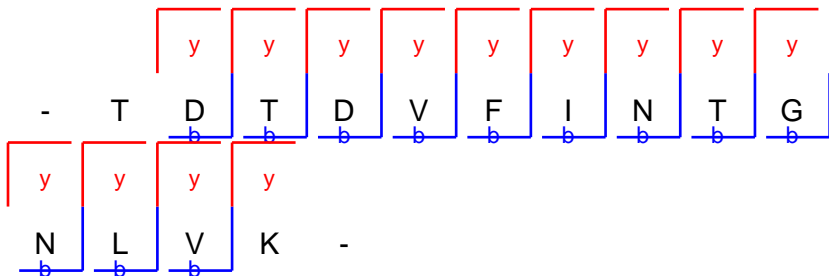

RO-QC-160121\_ZackD\_SS\_Set\_01\_Fraction 30745 FTMS; HC 61.44 662.35 TMEM87B

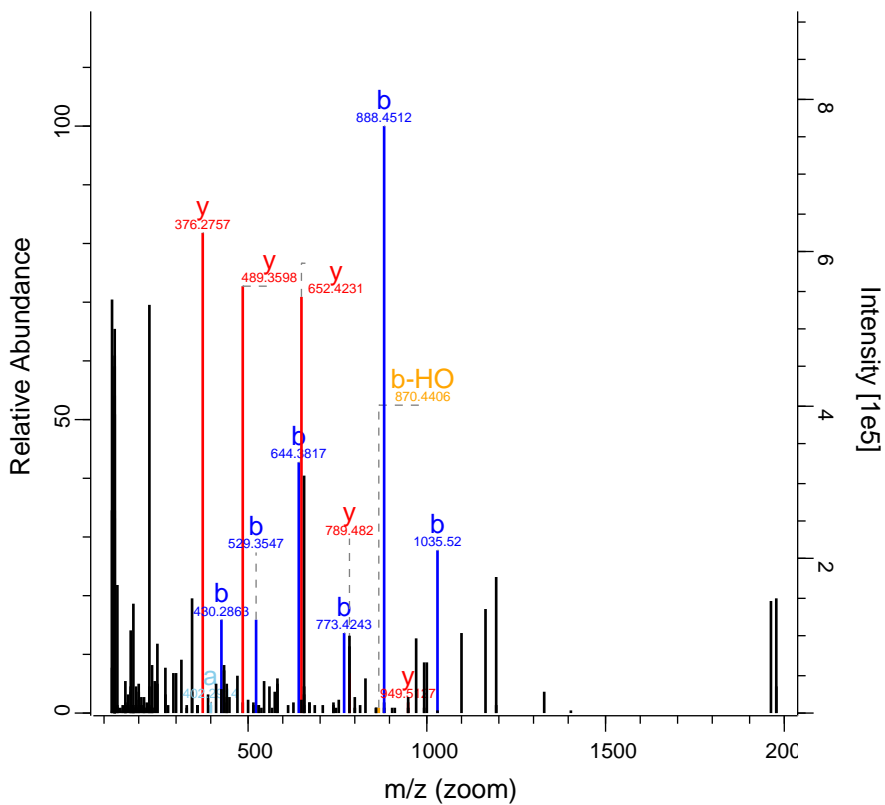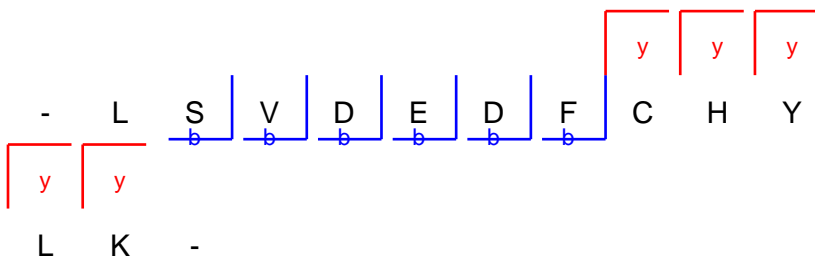

RO-QC-160121\_ZackD\_SS\_Set\_01\_Fractic 32023 FTMS; HC 41.73 1303.26 DMKN

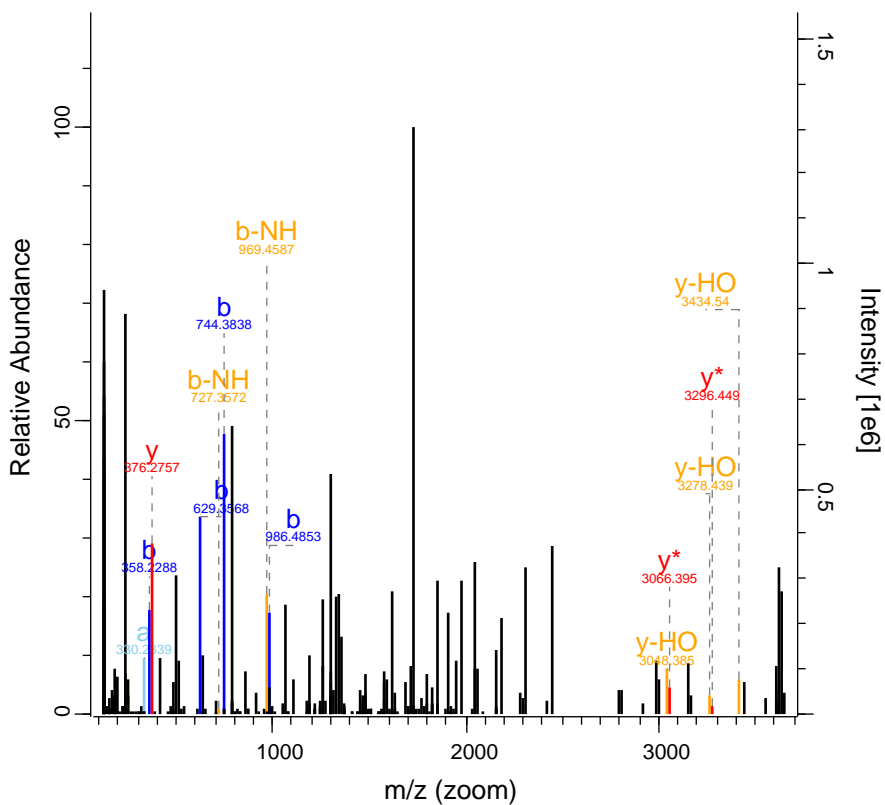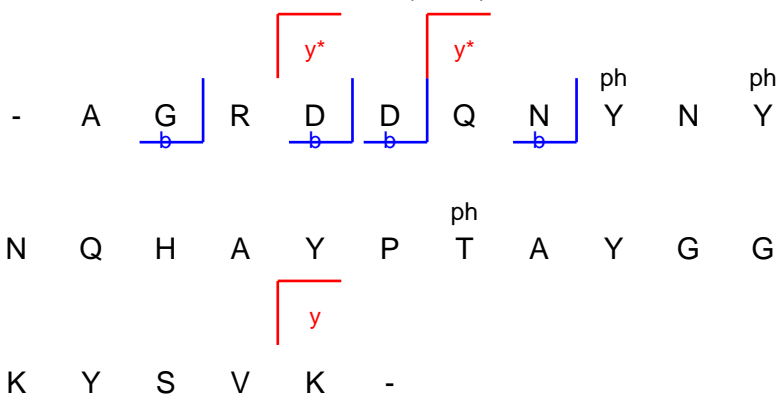

RO-QC-160121\_ZackD\_SS\_Set\_01\_Fractic 32818 FTMS; HC 313.92 1245.66 IER3IP1

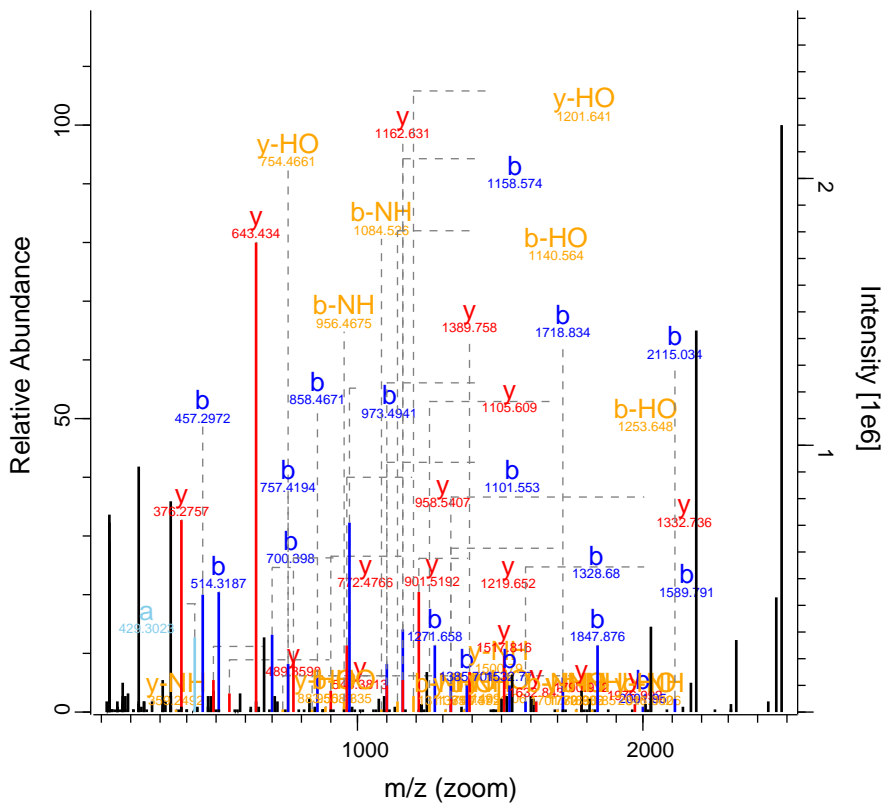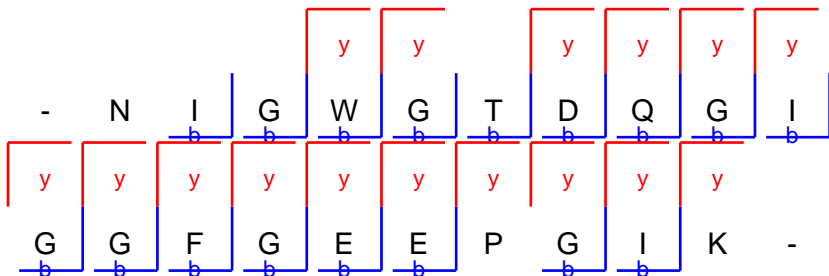



RO-QC-160121\_ZackD\_SS\_Set\_01\_Fraction 32832 FTMS; HC 137.43 831.11 IER3IP1

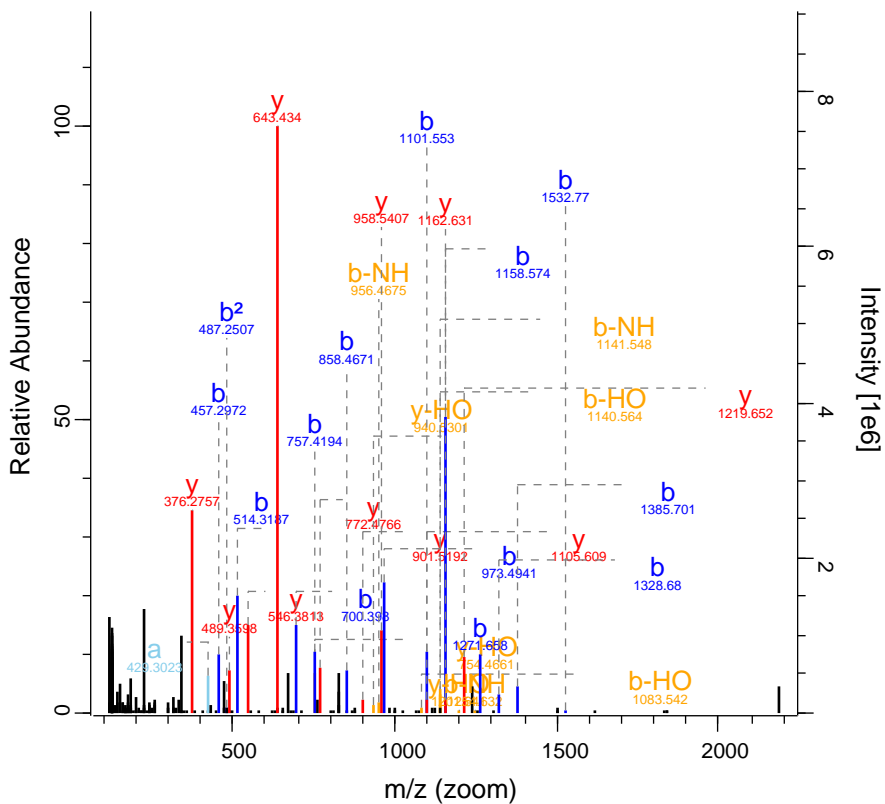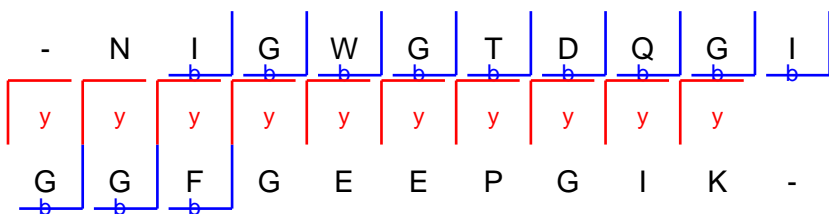



RO-QC-160121\_ZackD\_SS\_Set\_01\_Fraction 32870 FTMS; HC 85.81 623.58 IER3IP1

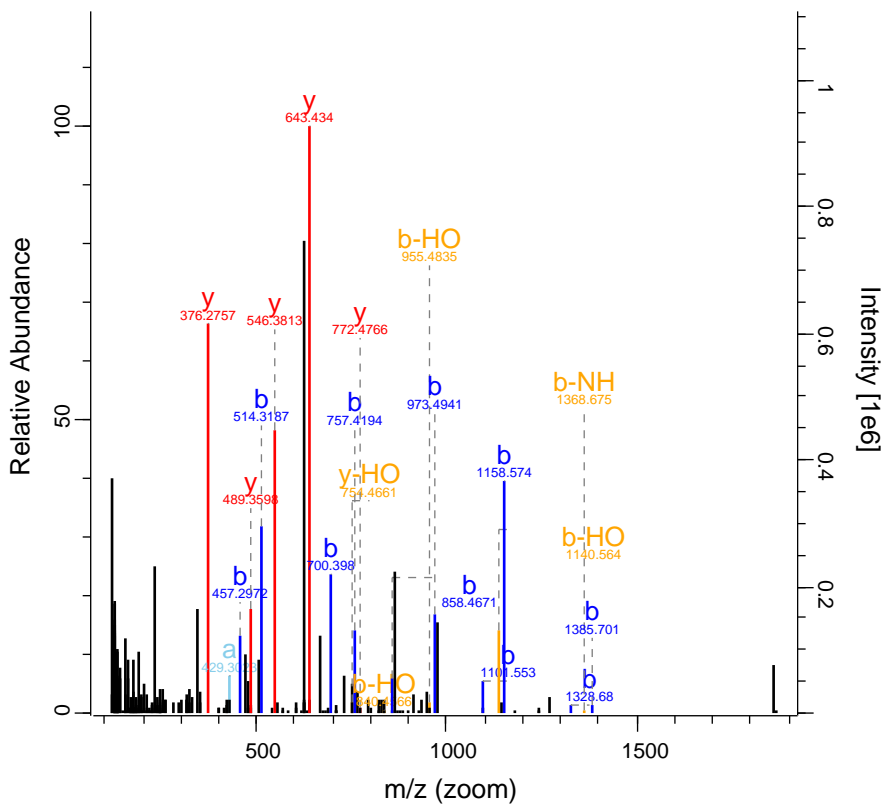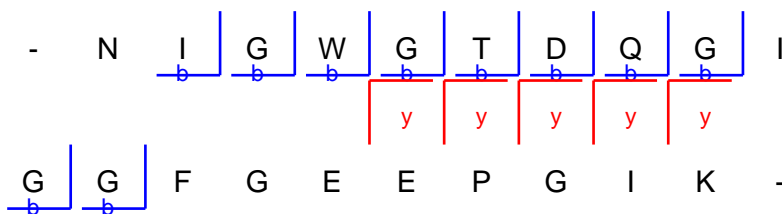

RO-QC-160121\_ZackD\_SS\_Set\_01\_Fractic 33028 FTMS; HC 324.38 1246.16 IER3IP1

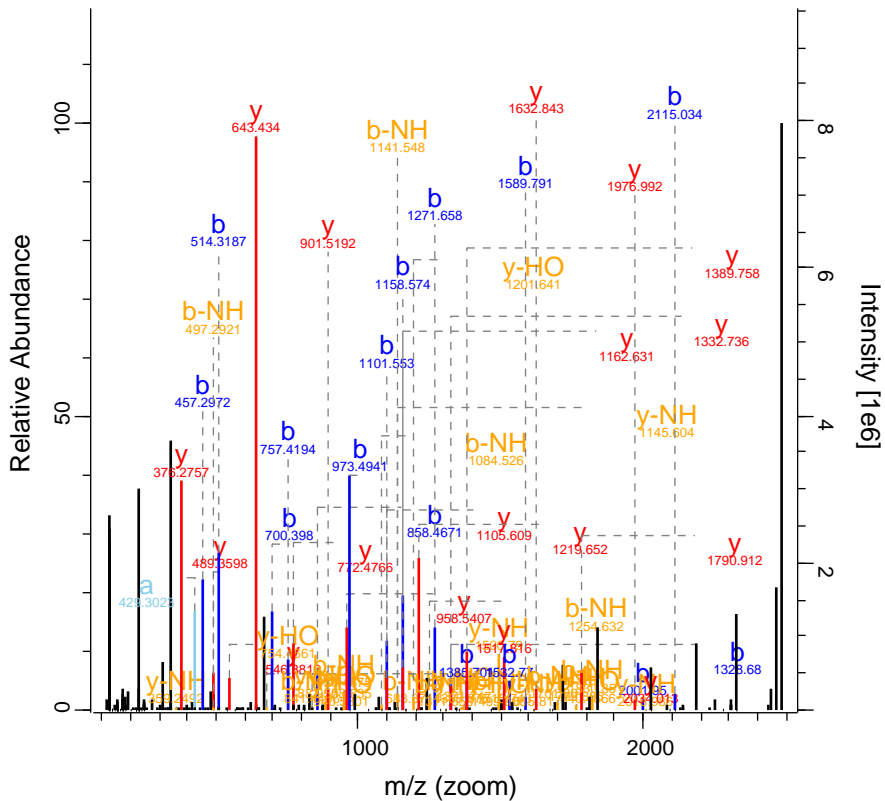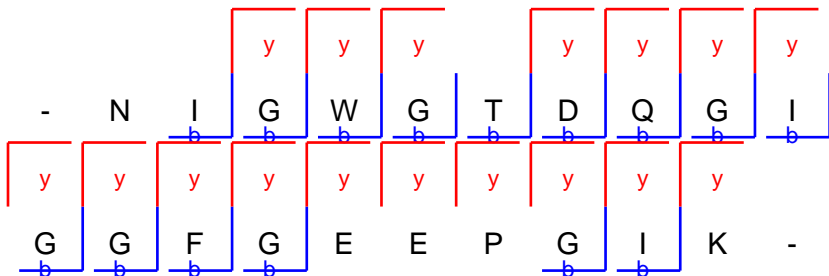

RO-QC-160121\_ZackD\_SS\_Set\_01\_Fractio 33031 FTMS; HC 163.79 831.11 IER3IP1

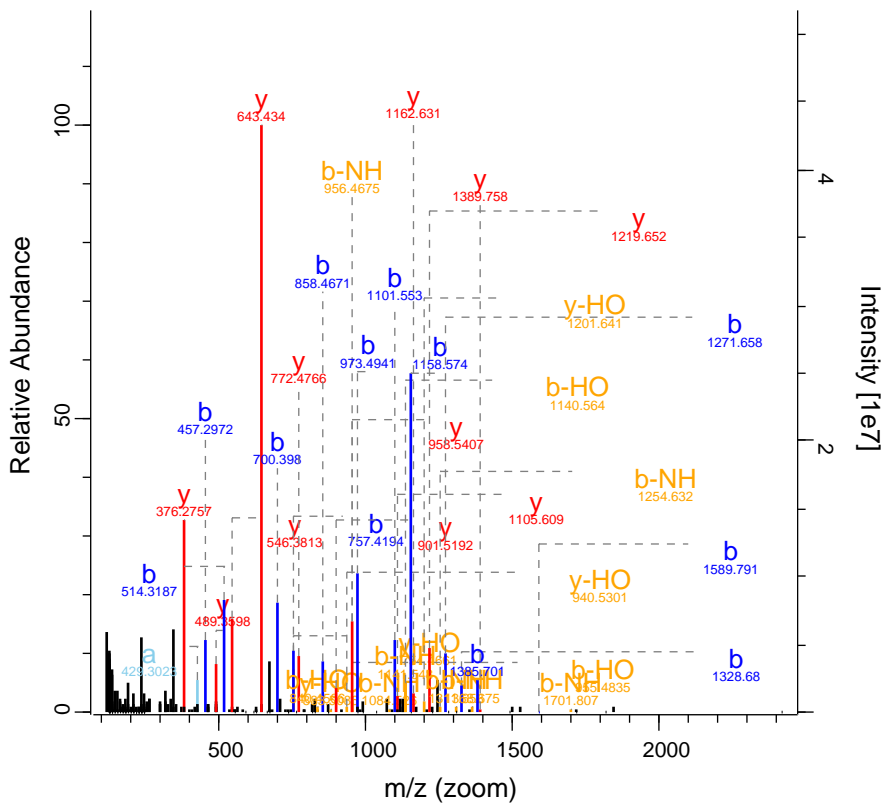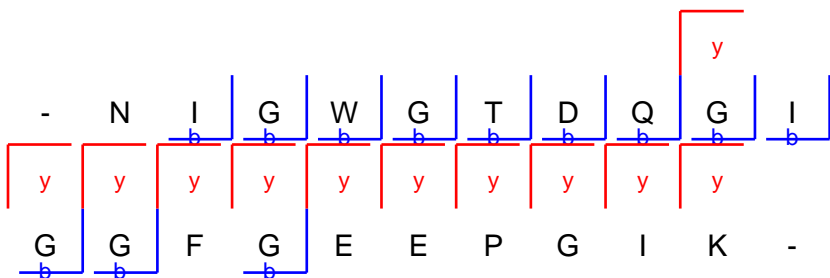

RO-QC-160121\_ZackD\_SS\_Set\_01\_Fraction 33077 FTMS; HC 84.25 623.58 IER3IP1

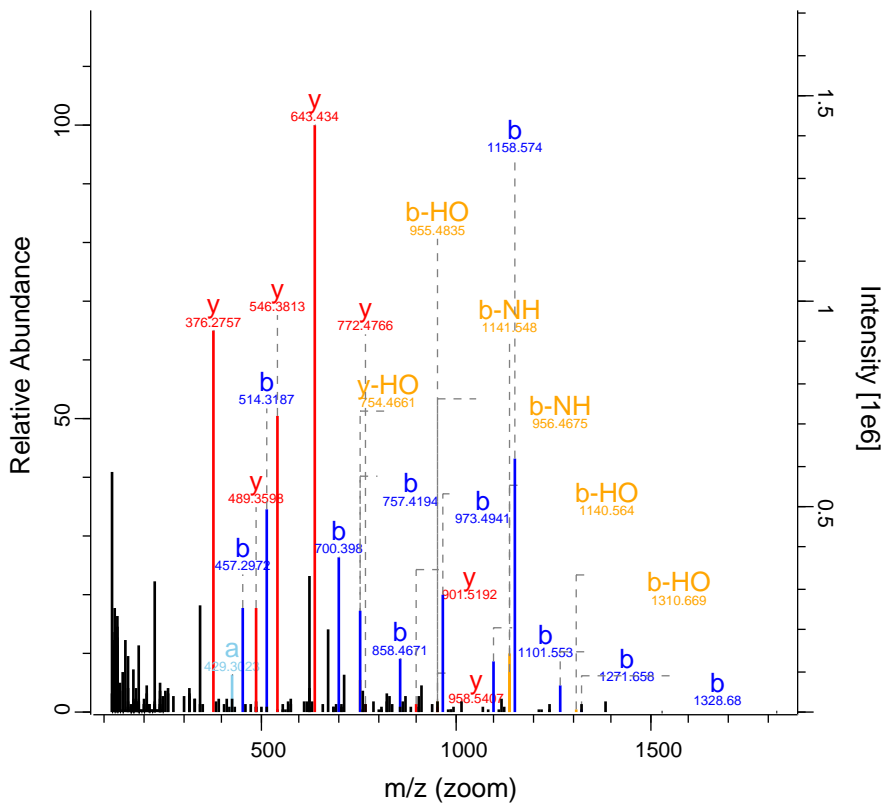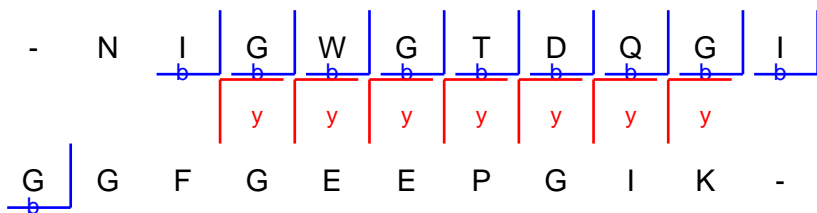



RO-QC-160121\_ZackD\_SS\_Set\_01\_Fractic 33922 FTMS; HC 157.52 1075.07 GPT2;GPT

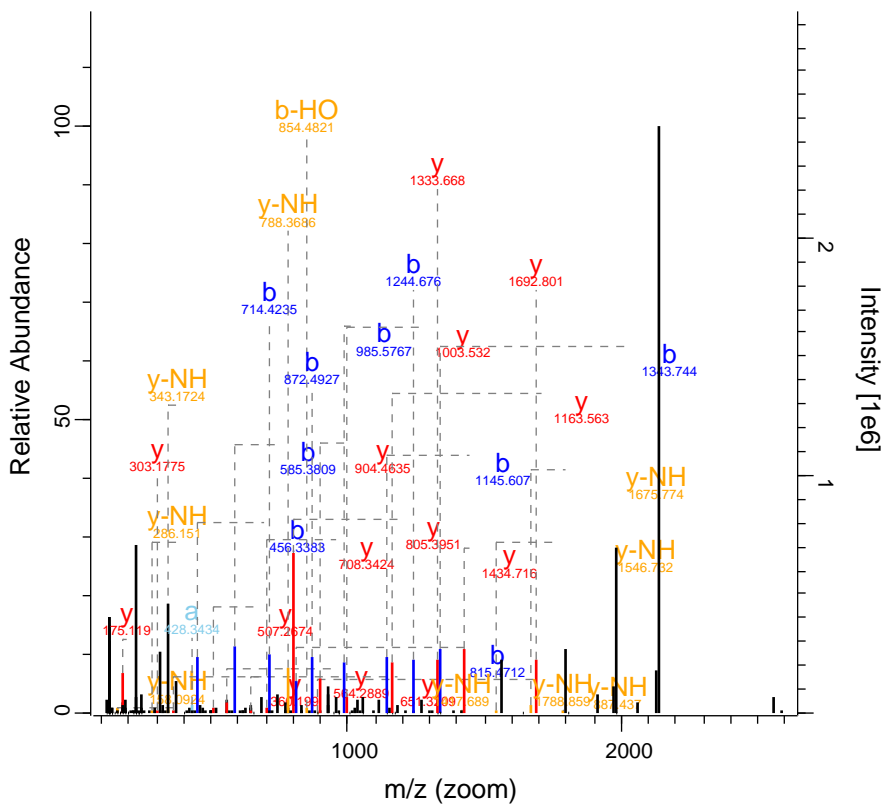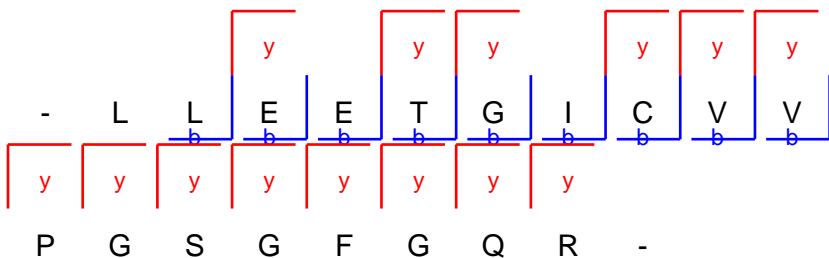

P G S G F G Q R -





RO-QC-160121\_ZackD\_SS\_Set\_01\_Fraction 35330 FTMS; HC 75.57 692.07 PPP4R4

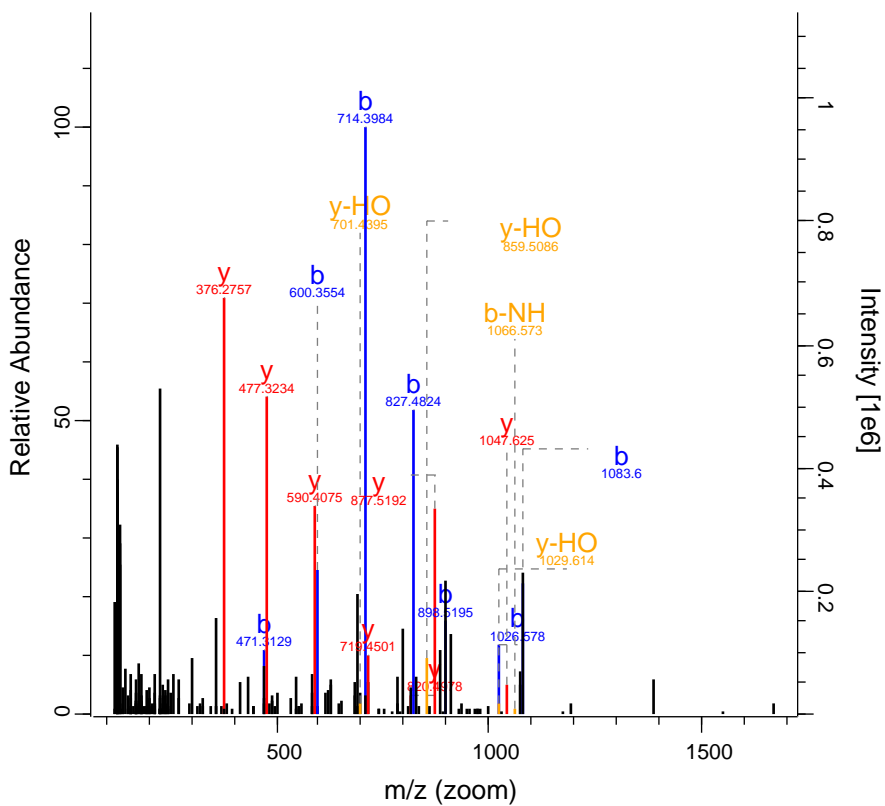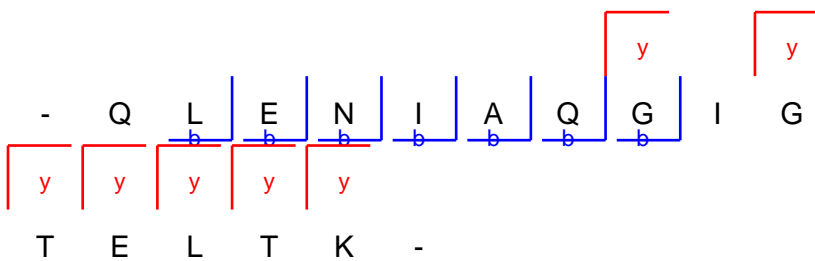



RO-QC-160121\_ZackD\_SS\_Set\_01\_Fraction 37650 FTMS; HC 82.41 723.03 DEGS1

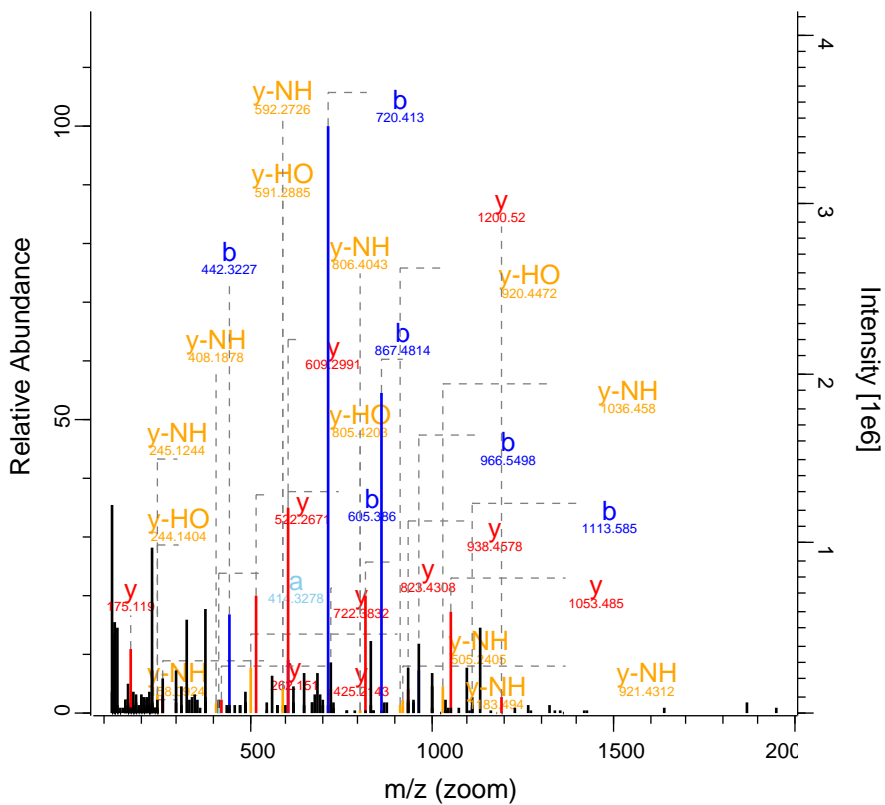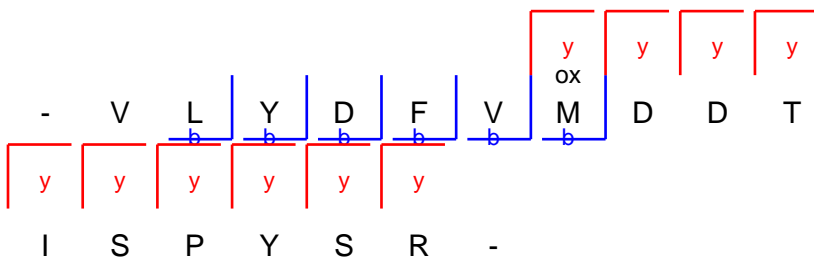

RO-QC-160121\_ZackD\_SS\_Set\_01\_Fractic 37786 FTMS; HC 41.05 1196.66 LRRC49

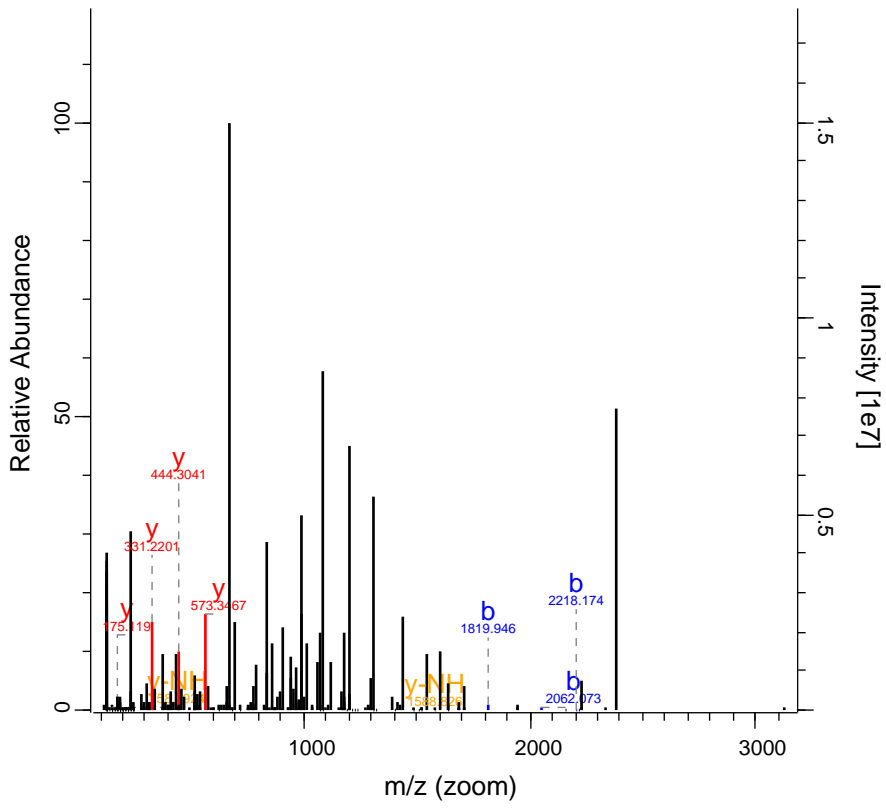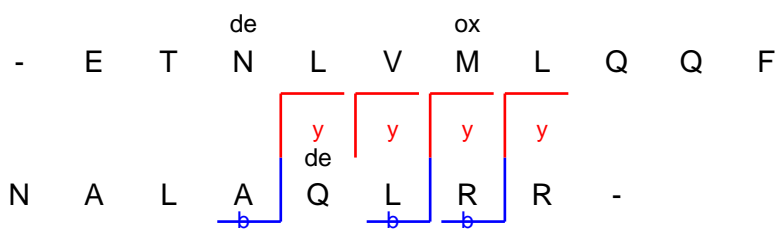

RO-QC-160121\_ZackD\_SS\_Set\_01\_Fraction 38762 FTMS; HC 41.09 762.45 SYT5

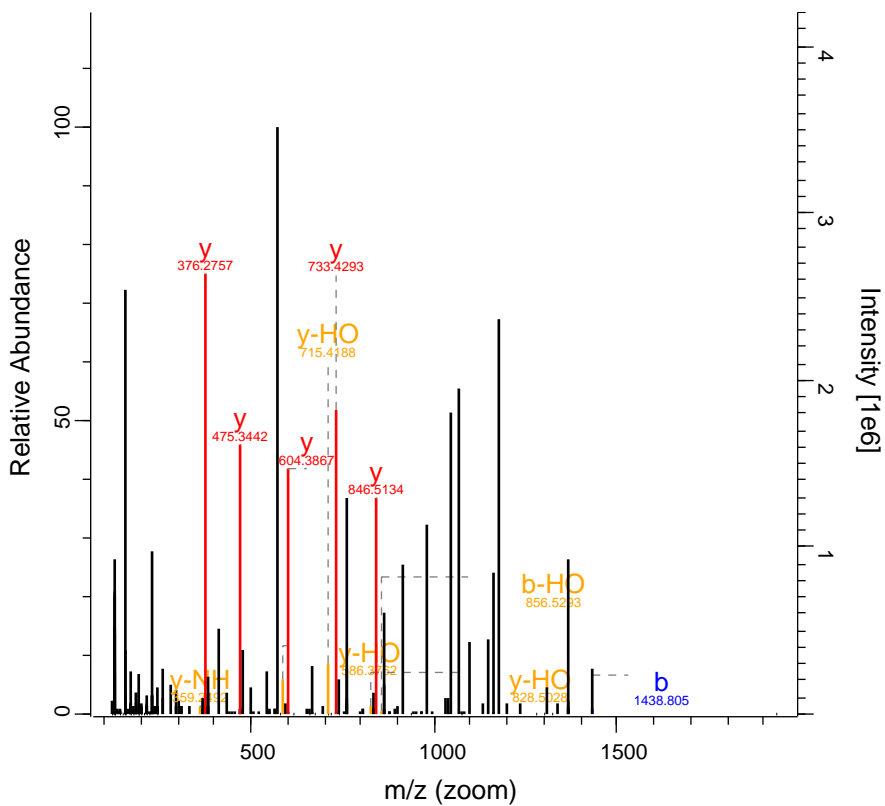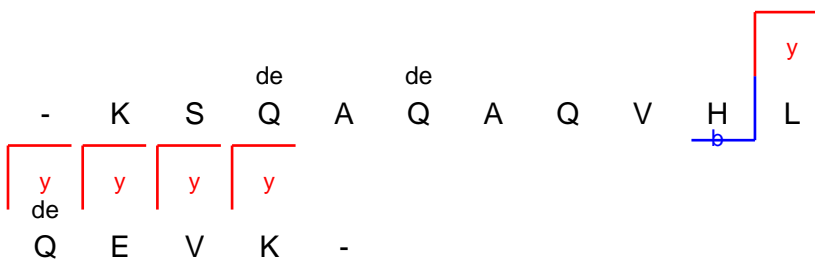

Q E V K -

RO-QC-160121\_ZackD\_SS\_Set\_01\_Fraction 38775 FTMS; HC 85.26 796.93 KLHDC9

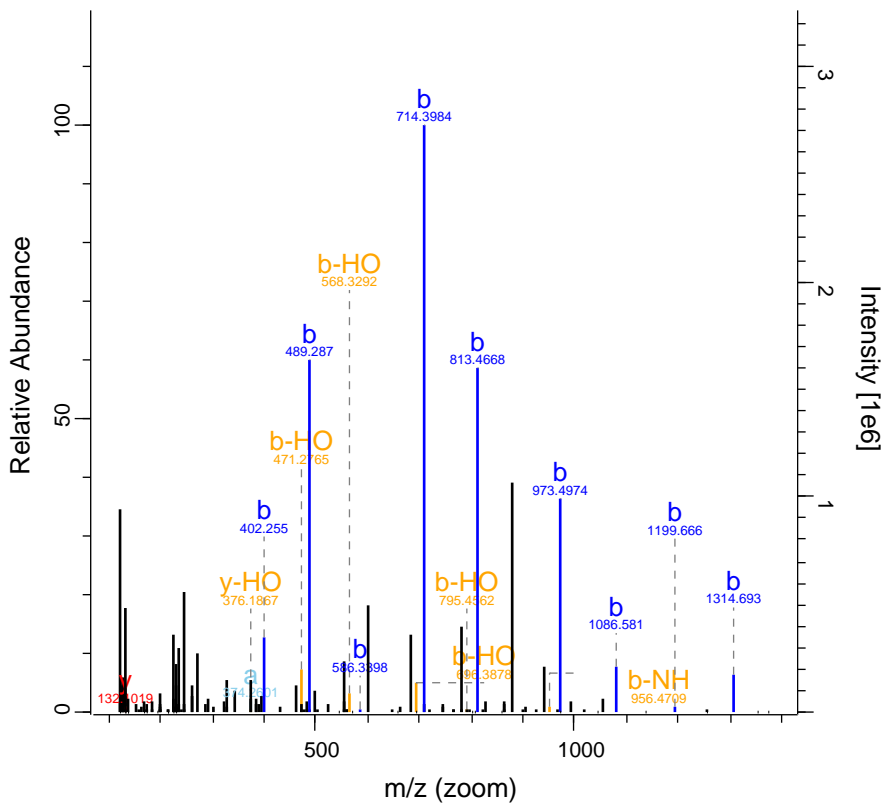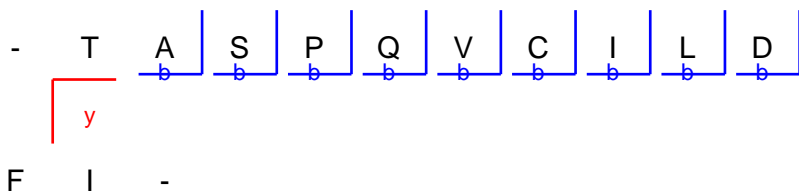





RO-QC-160121\_ZackD\_SS\_Set\_01\_Fractio 39079 FTMS; HC 161.67 840.92 SENP8

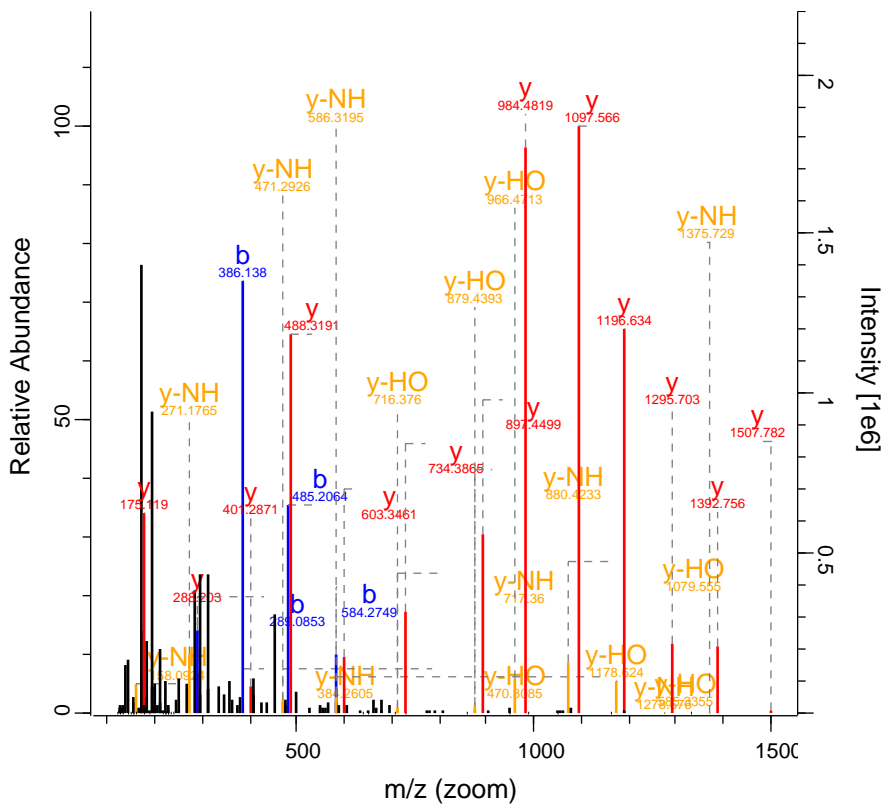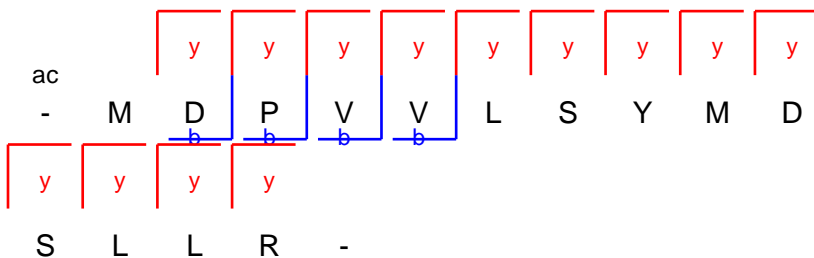

RO-QC-160121\_ZackD\_SS\_Set\_01\_Fraction 4517 FTMS; HCl 84.05 507.95 METTL25

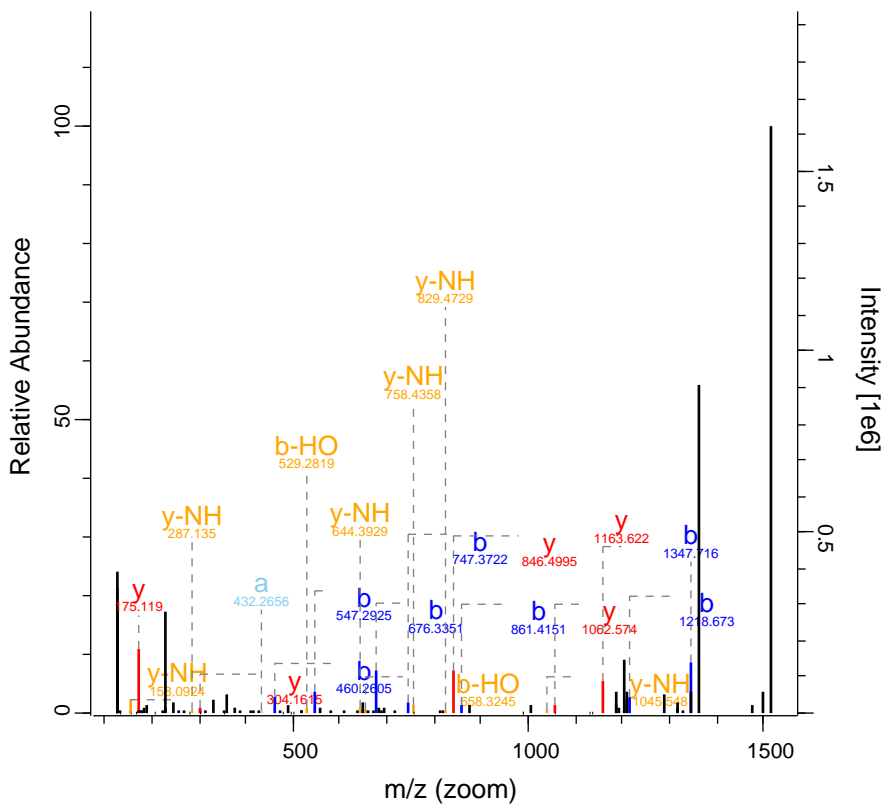

m/z (zoom)

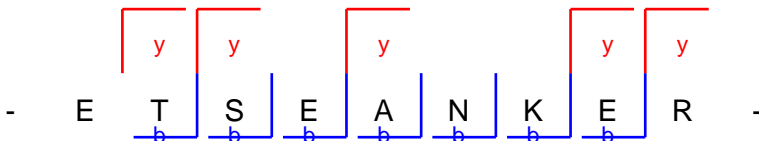

RO-QC-160121\_ZackD\_SS\_Set\_01\_Fraction 4984 FTMS; HCl; 57.14 638.97 SUV420H1

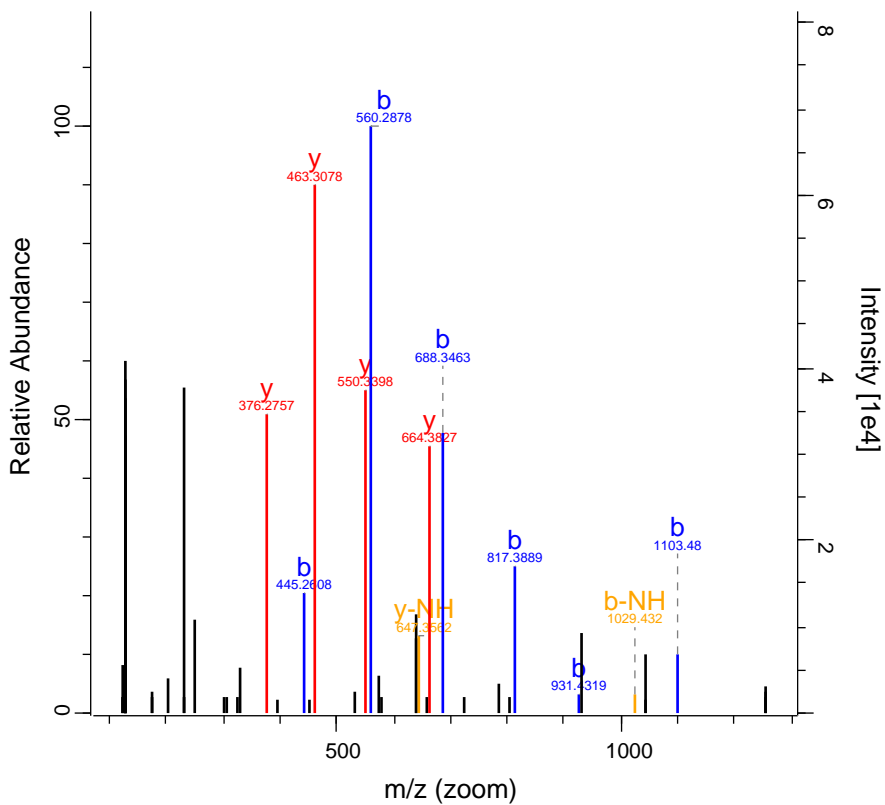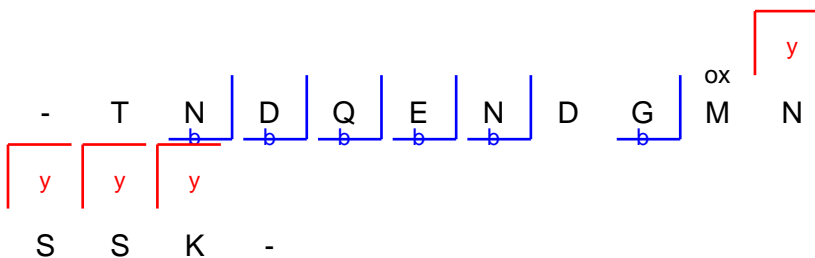

RO-QC-160121\_ZackD\_SS\_Set\_01\_Fraction15172 FTMS; HC 150.94 854.73 ATXN7

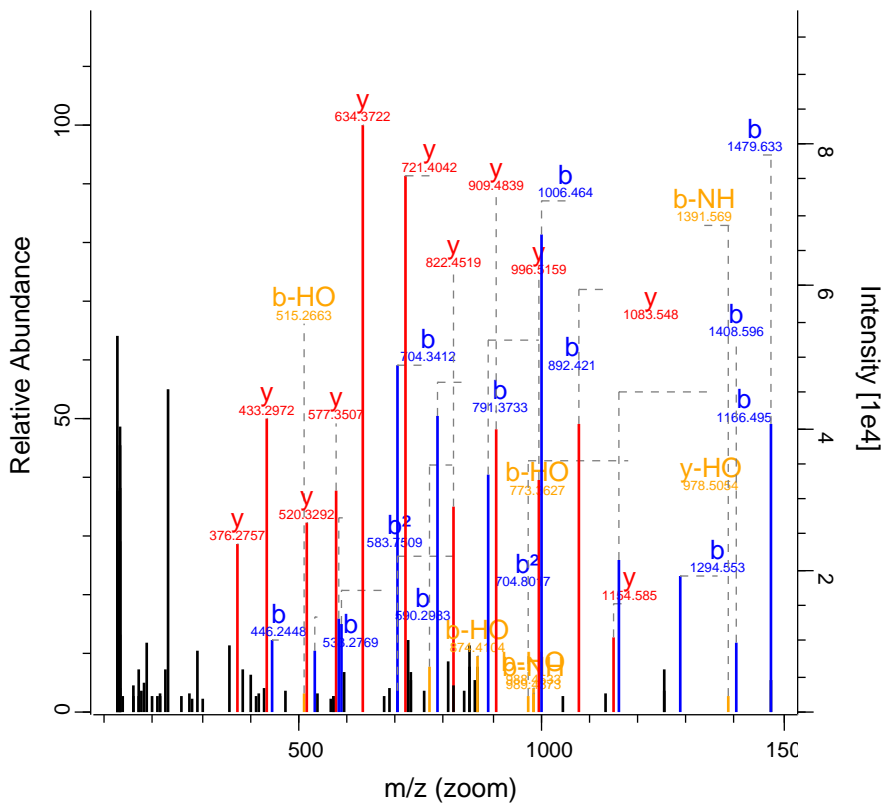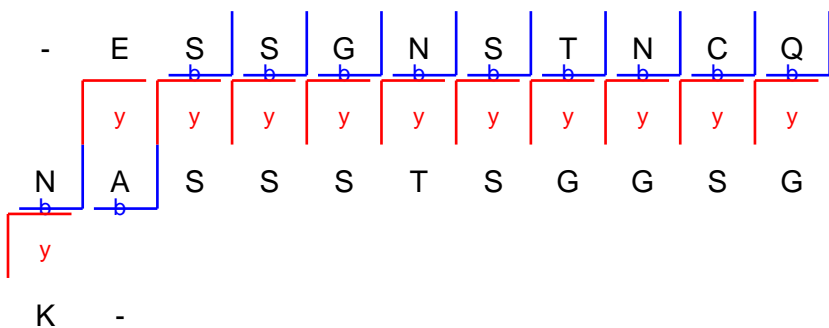

RO-QC-160121\_ZackD\_SS\_Set\_01\_Fraction 5282 FTMS; HCl 107.37 573.3 CMTM3

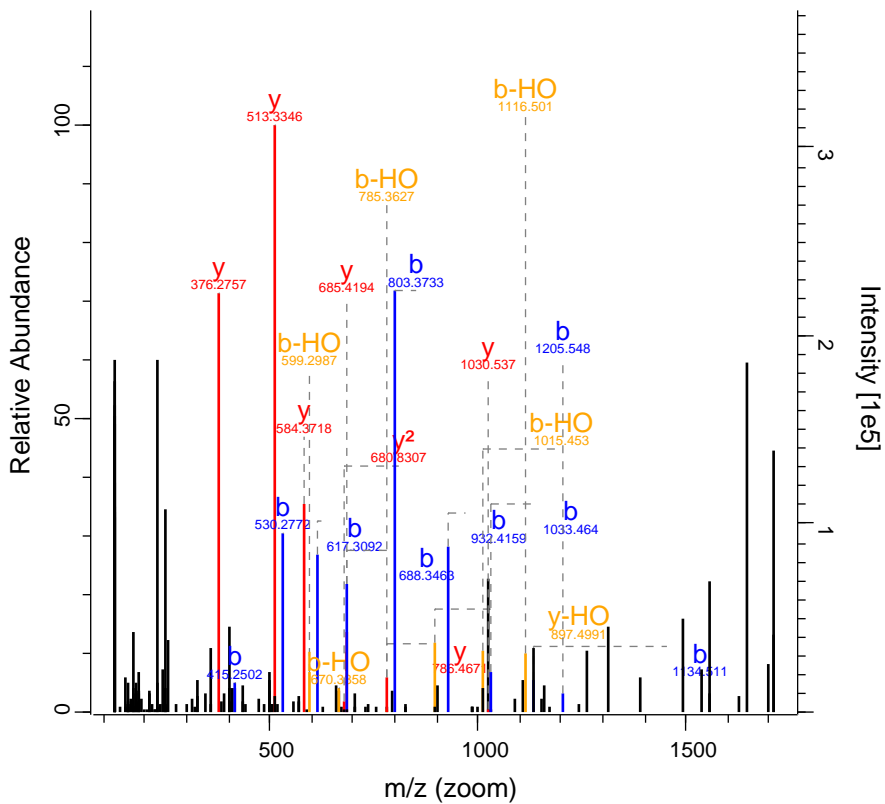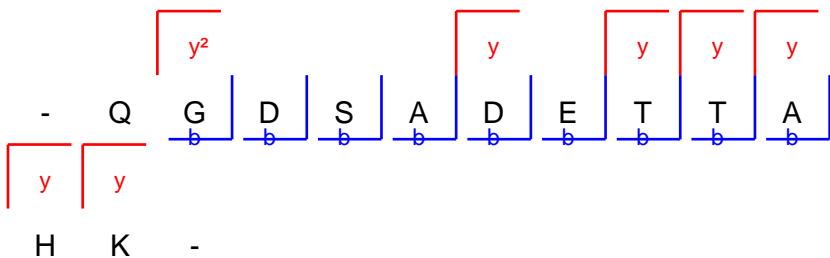

RO-QC-160121\_ZackD\_SS\_Set\_01\_Fraction 5357 FTMS; HCl 70.93 683.83 LMBR1

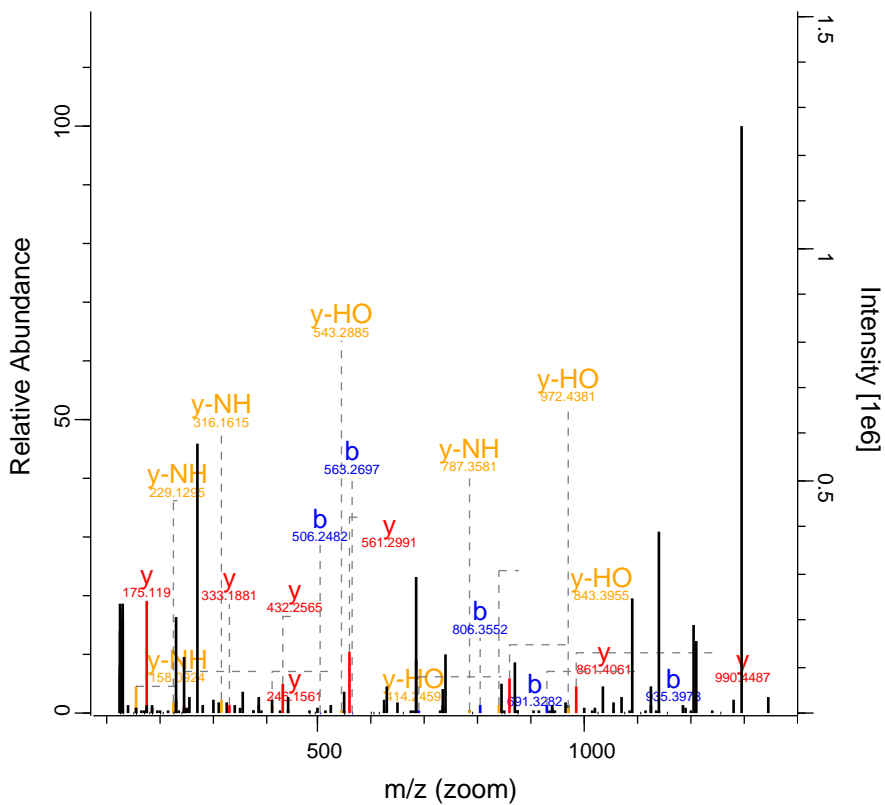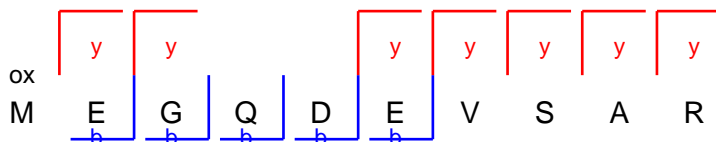

RO-QC-160121\_ZackD\_SS\_Set\_01\_Fraction 5531 FTMS; HC 116.88 566.79 NXNL1

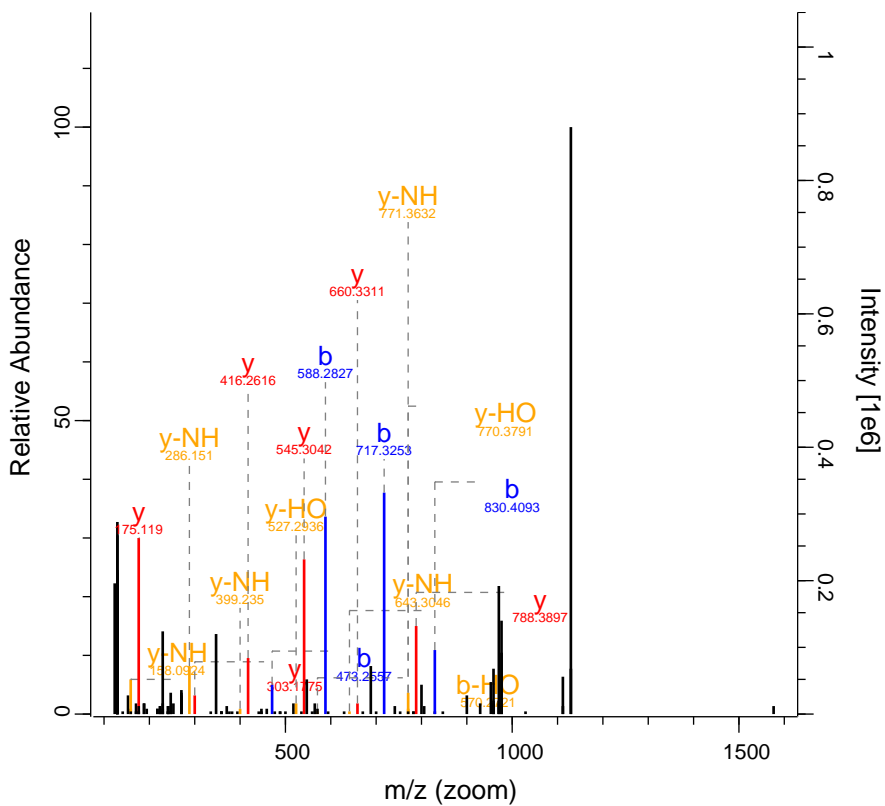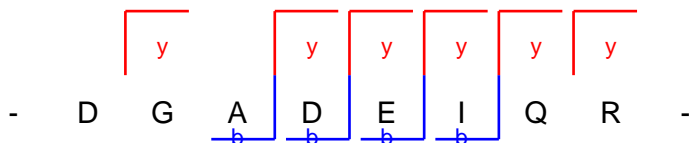

RO-QC-160121\_ZackD\_SS\_Set\_01\_Fraction 6188 FTMS; HCl 56.65 672.34 ADAMTS3

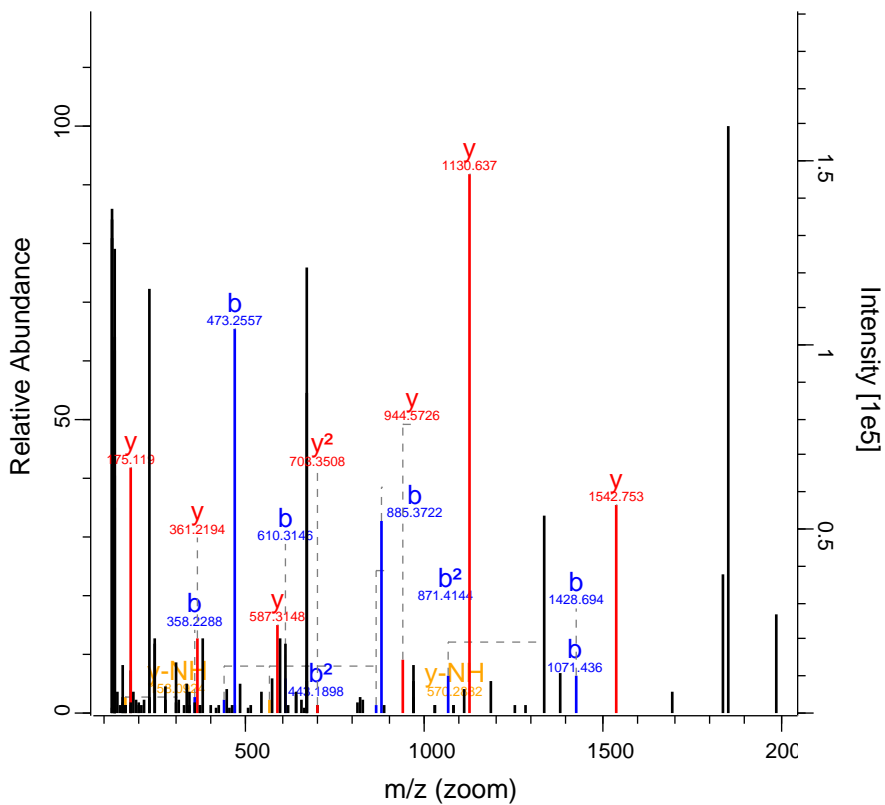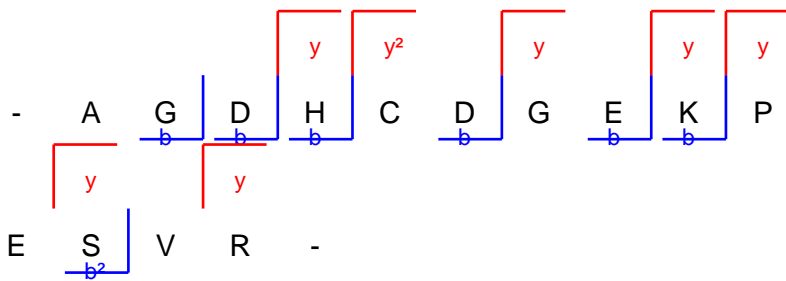



RO-QC-160121\_ZackD\_SS\_Set\_01\_Fraction 6343 FTMS; HC 107.83 385.24 MGP

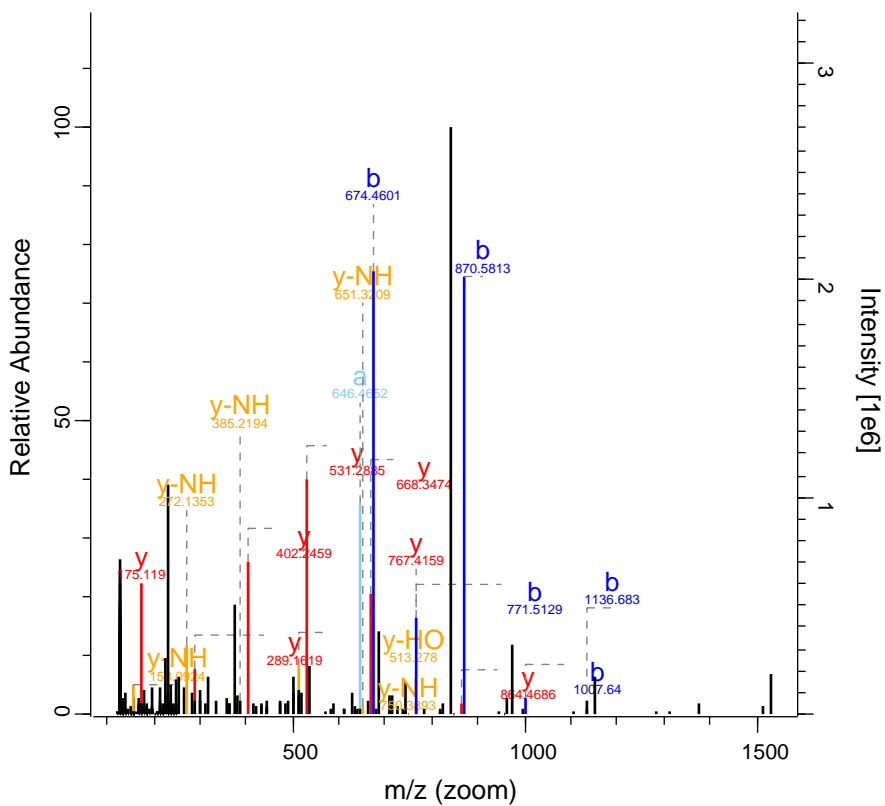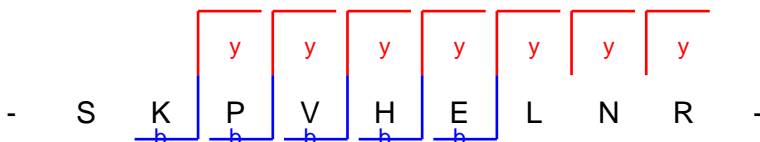

RO-QC-160121\_ZackD\_SS\_Set\_01\_Fraction 6662 FTMS; HCl 67.11 551.66 HAND2

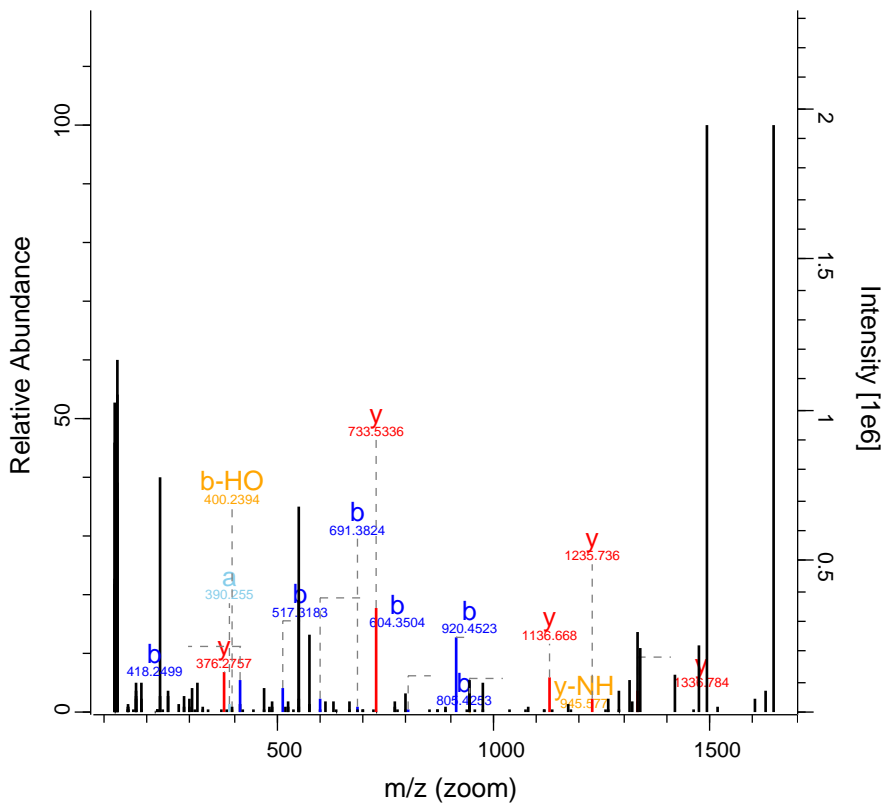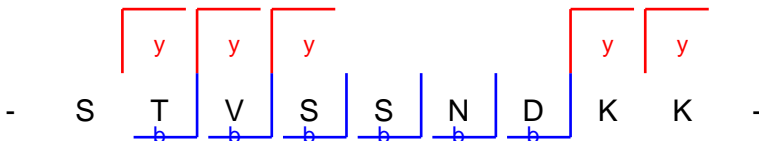

RO-QC-160121\_ZackD\_SS\_Set\_01\_Fraction 6763 FTMS; HC 111.06 674.36 TIPIN

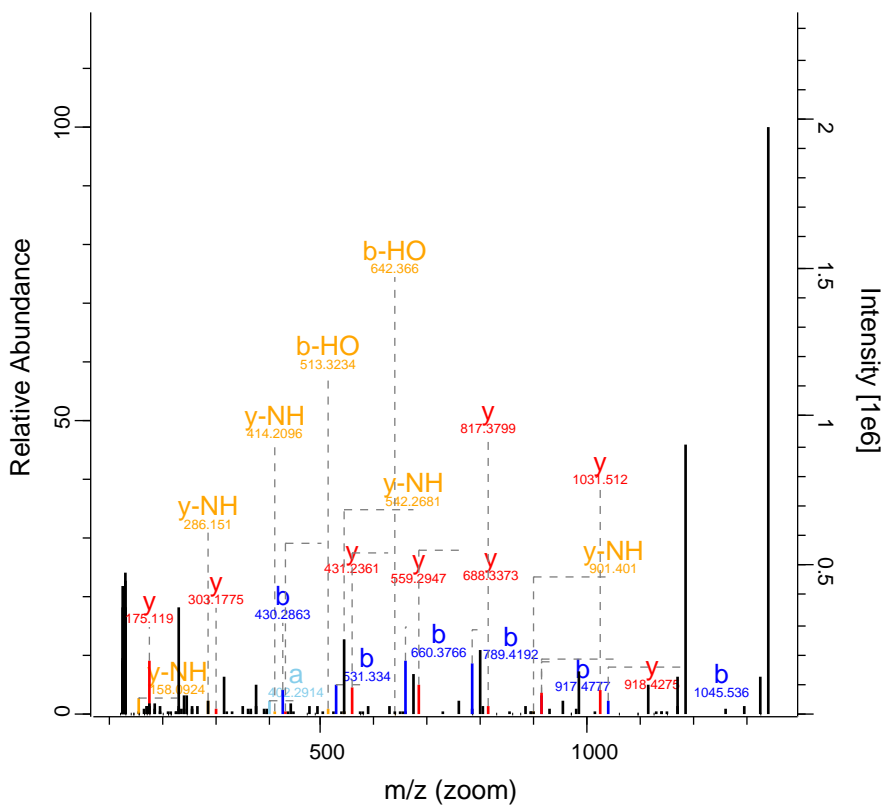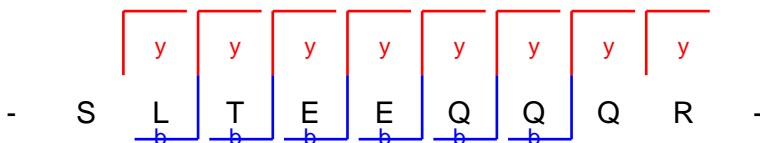

RO-QC-160121\_ZackD\_SS\_Set\_01\_Fraction 6996 FTMS; HC 120.46 682.87 ING5

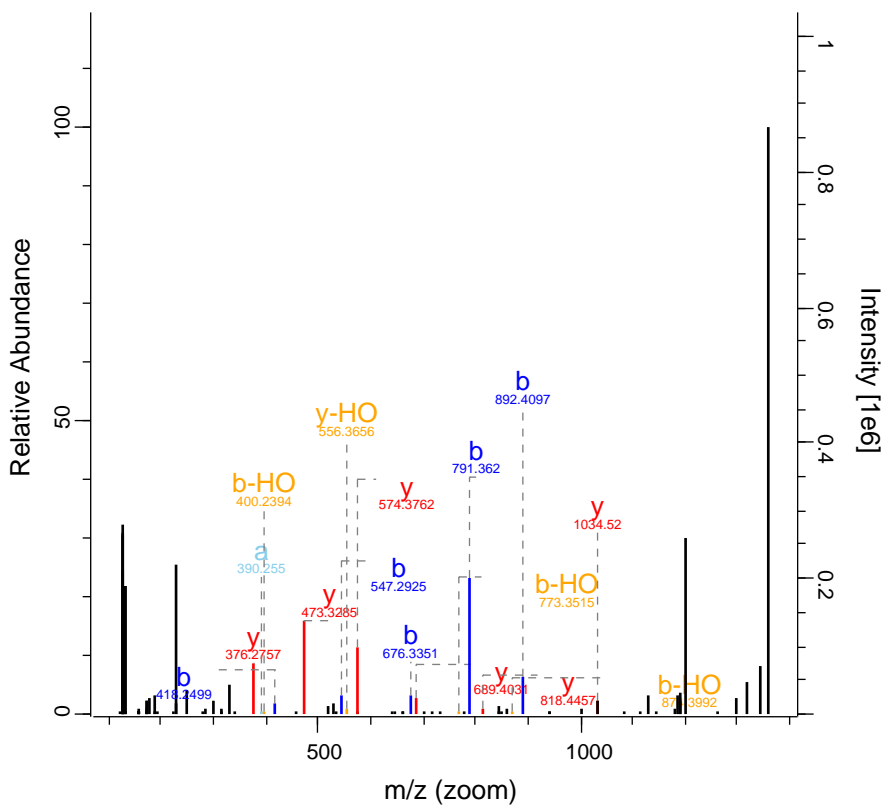

m/z (zoom)

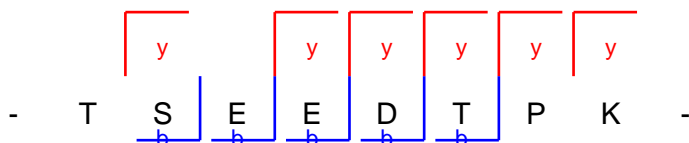

RO-QC-160121\_ZackD\_SS\_Set\_01\_Fraction 7181 FTMS; HC 102.89 761.04 ADRA2B

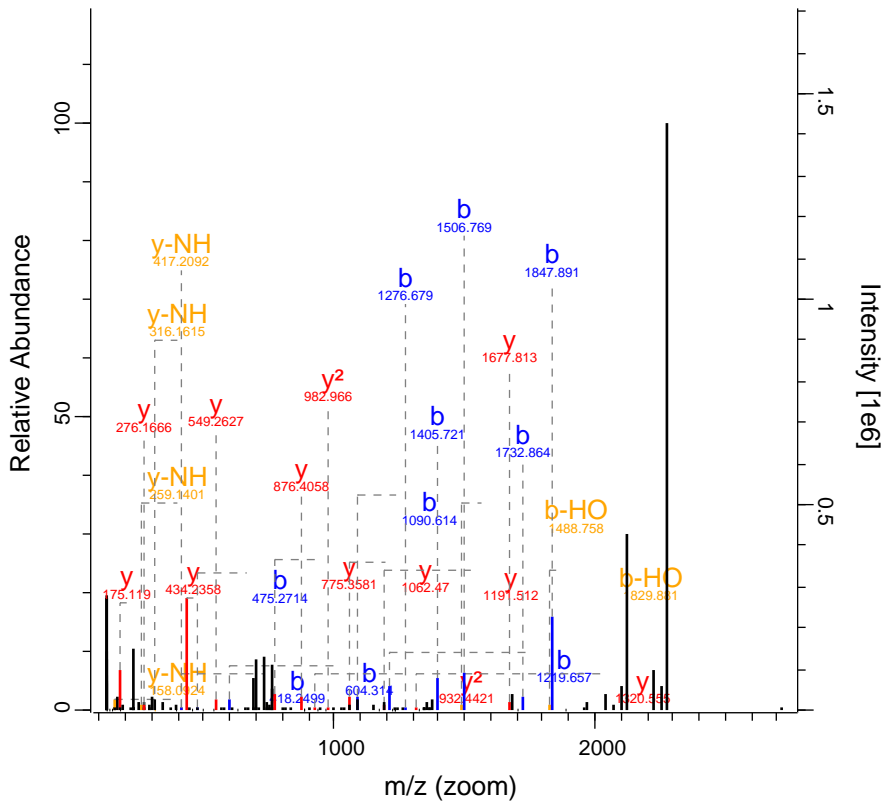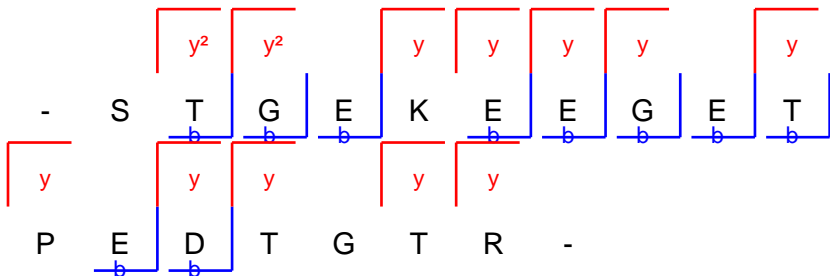

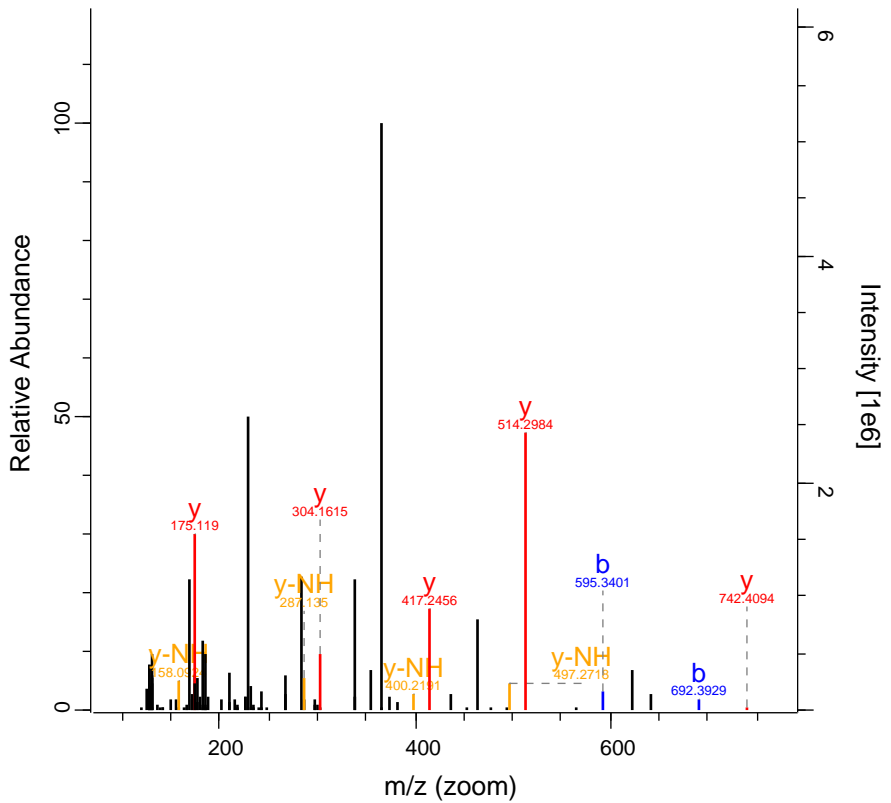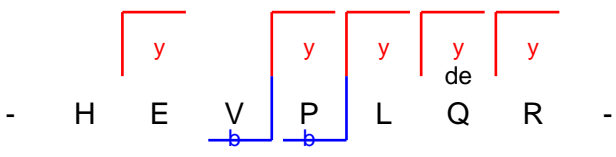

RO-QC-160121\_ZackD\_SS\_Set\_01\_Fraction 7808 FTMS; HCl 45.88 433.75 KCNA10

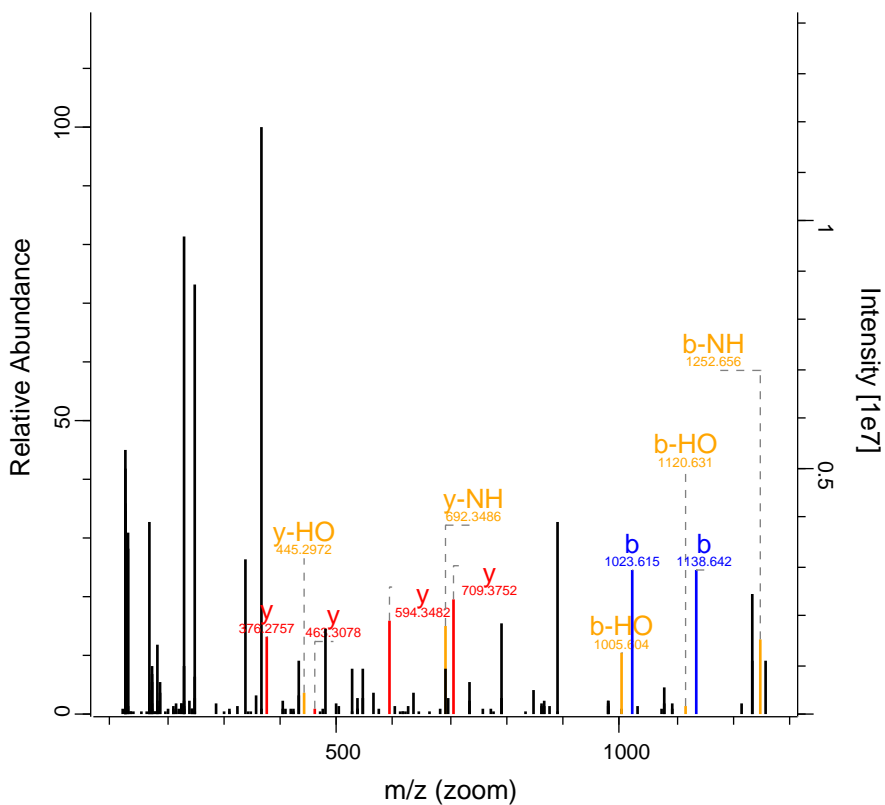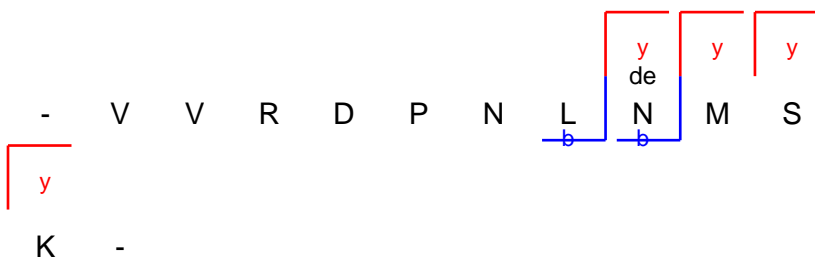

K -

RO-QC-160121\_ZackD\_SS\_Set\_01\_Fraction 7926 FTMS; HCl 142.07 768.4 PLEKHH2

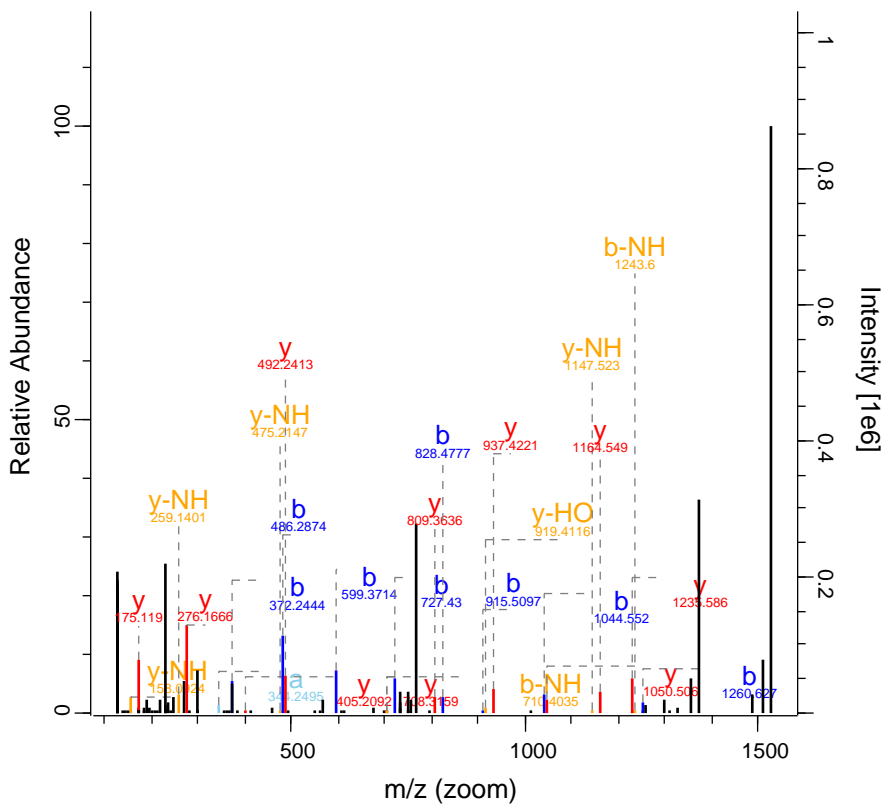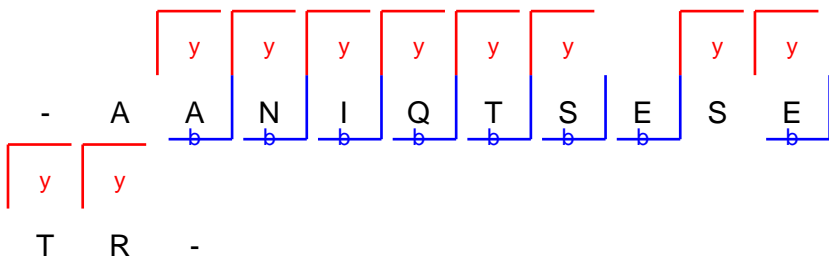





RO-QC-160121\_ZackD\_SS\_Set\_01\_Fraction 8820 FTMS; HC 139.31 637.39 G6PC3

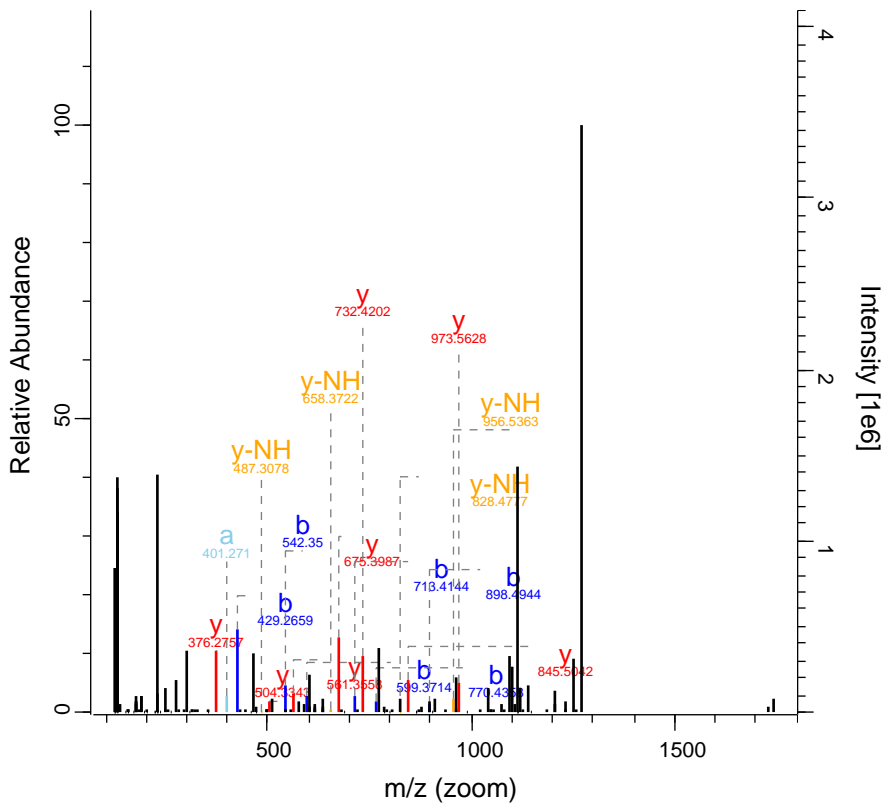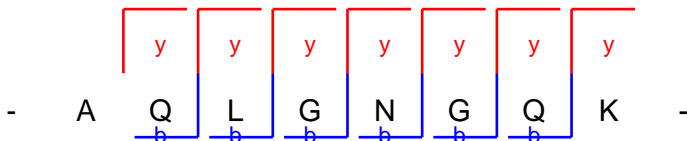

RO-QC-160121\_ZackD\_SS\_Set\_01\_Fraction 8994 FTMS; HCl 90.05 567.34 SLC35C1

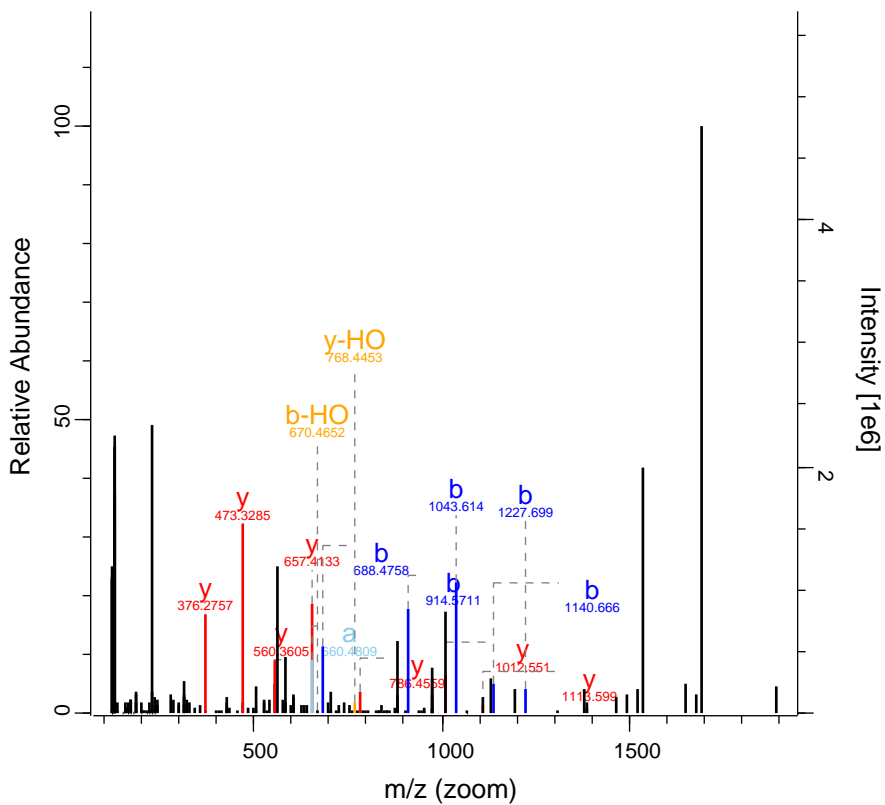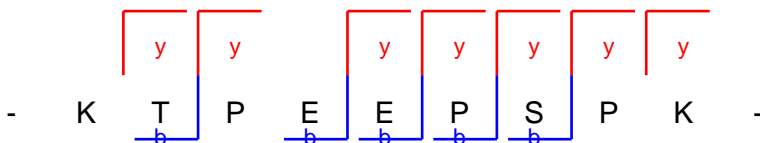

RO-QC-160121\_ZackD\_SS\_Set\_01\_Fraction 9177 FTMS; HCl 79.12 428.27 AZIN2

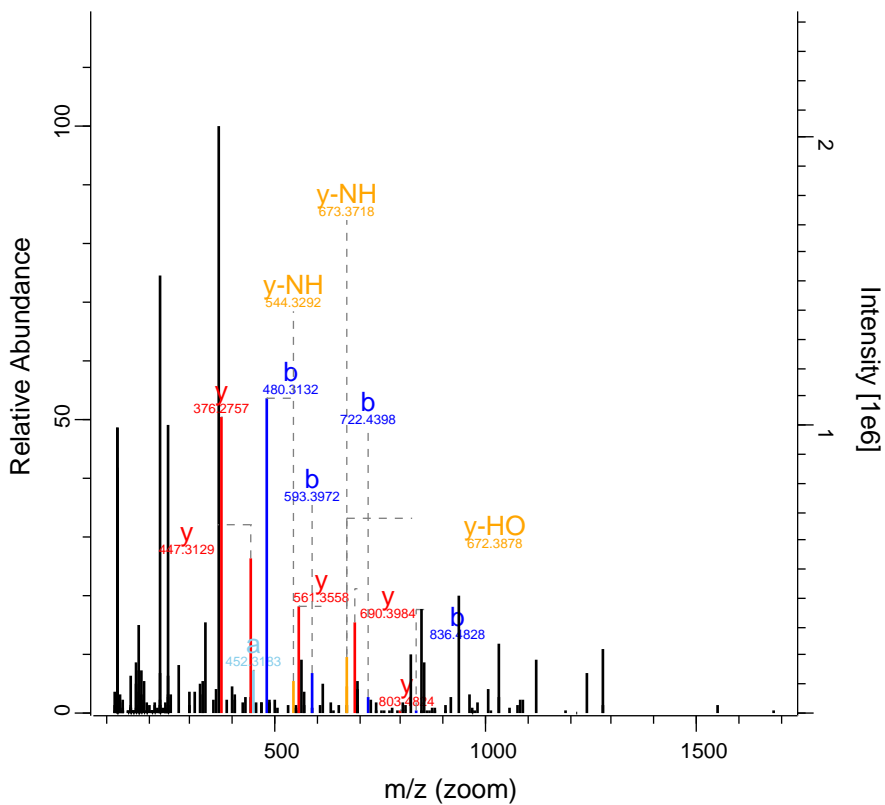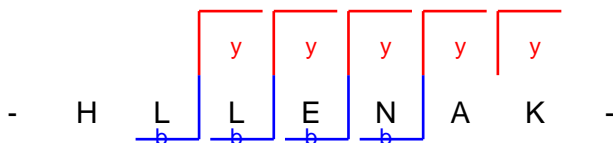

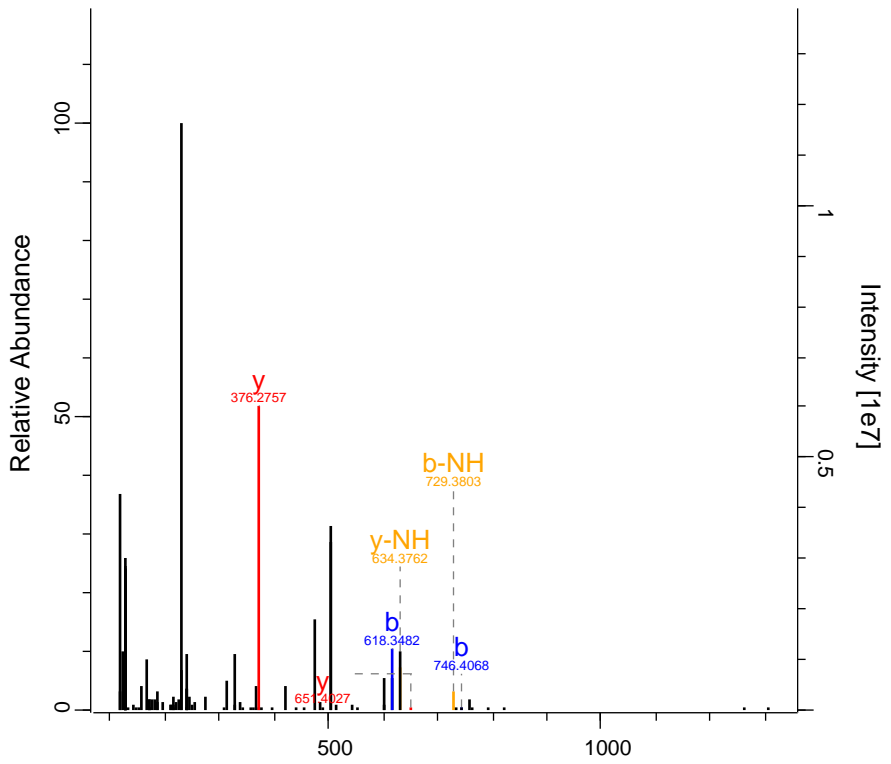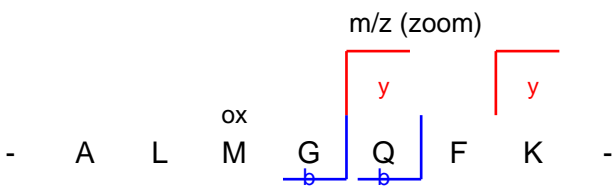

RO-QC-160121\_ZackD\_SS\_Set\_01\_Fraction 10043 FTMS; HC 53.71 685.85 CRIP1

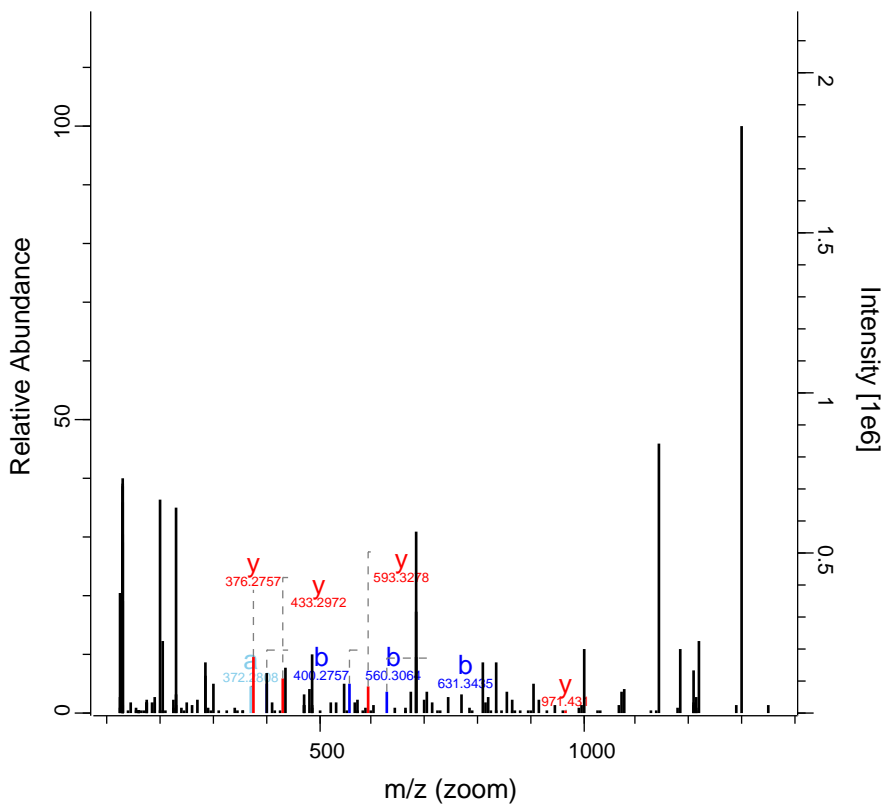

m/z (zoom)

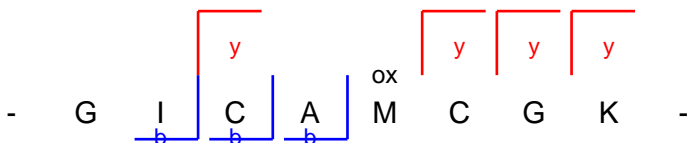

RO-QC-160121\_ZackD\_SS\_Set\_01\_Fractio 10049 FTMS; HC 179.42 680.38 ANKRD16

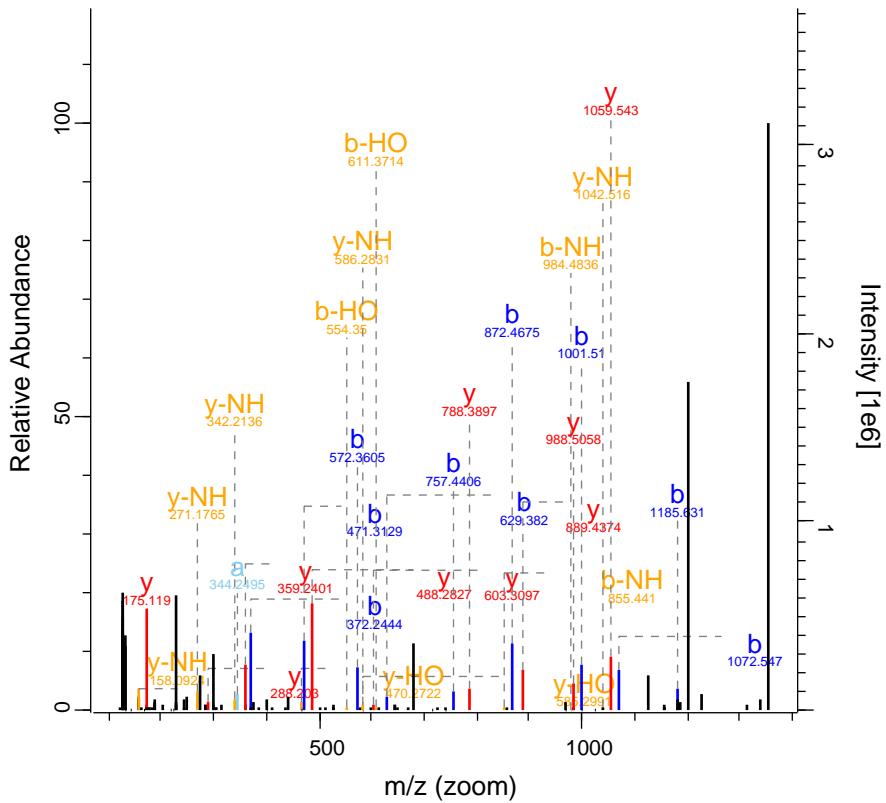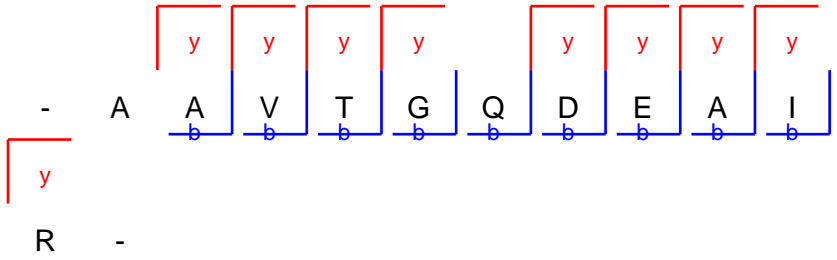

R -





RO-QC-160121\_ZackD\_SS\_Set\_01\_Fraction11033 FTMS; HCl 105.39 356.9 CENPA

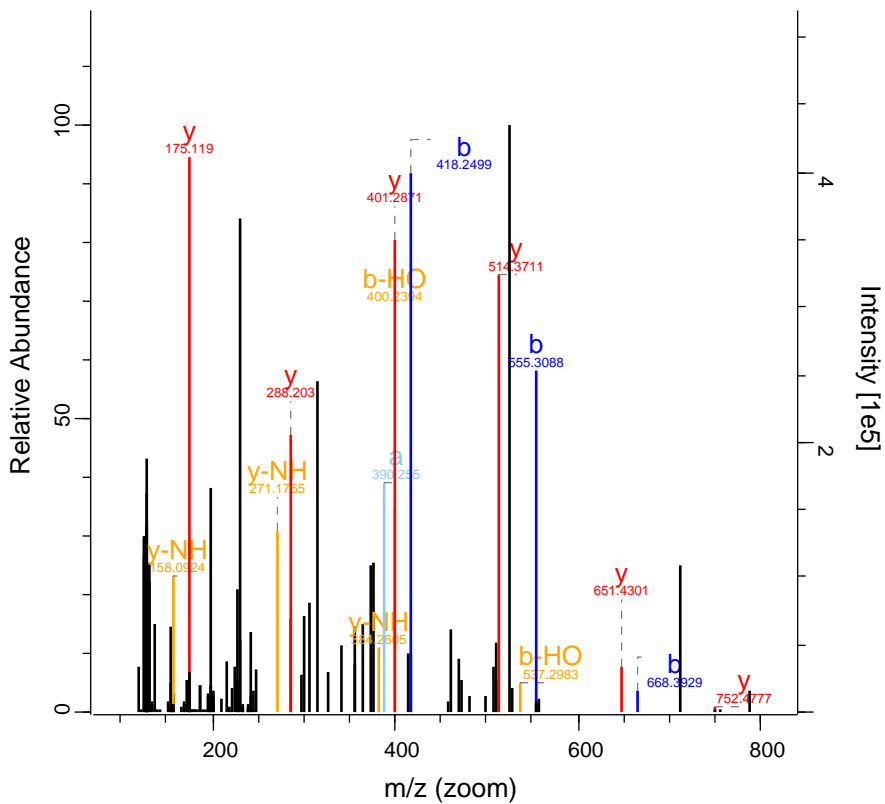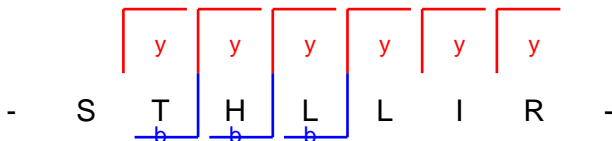

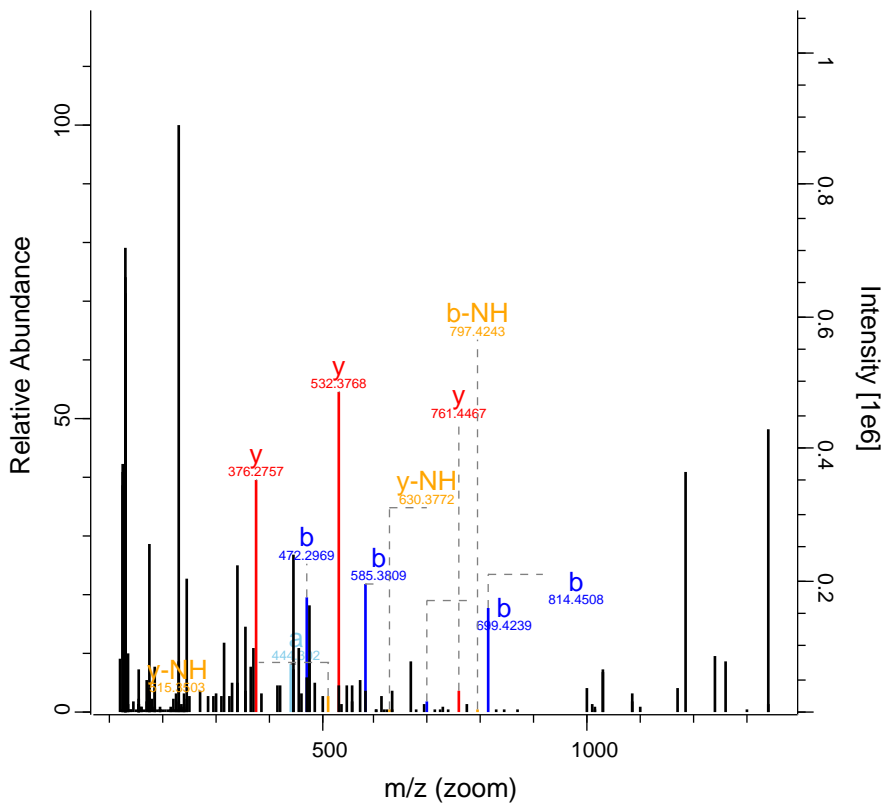

m/z (zoom)

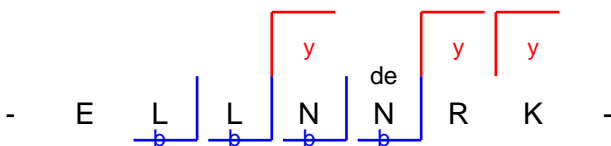

RO-QC-160121\_ZackD\_SS\_Set\_01\_Fr; 1154; FTMS; H( 81.12 596.3; ATP5G1; ATP5G2; ATP

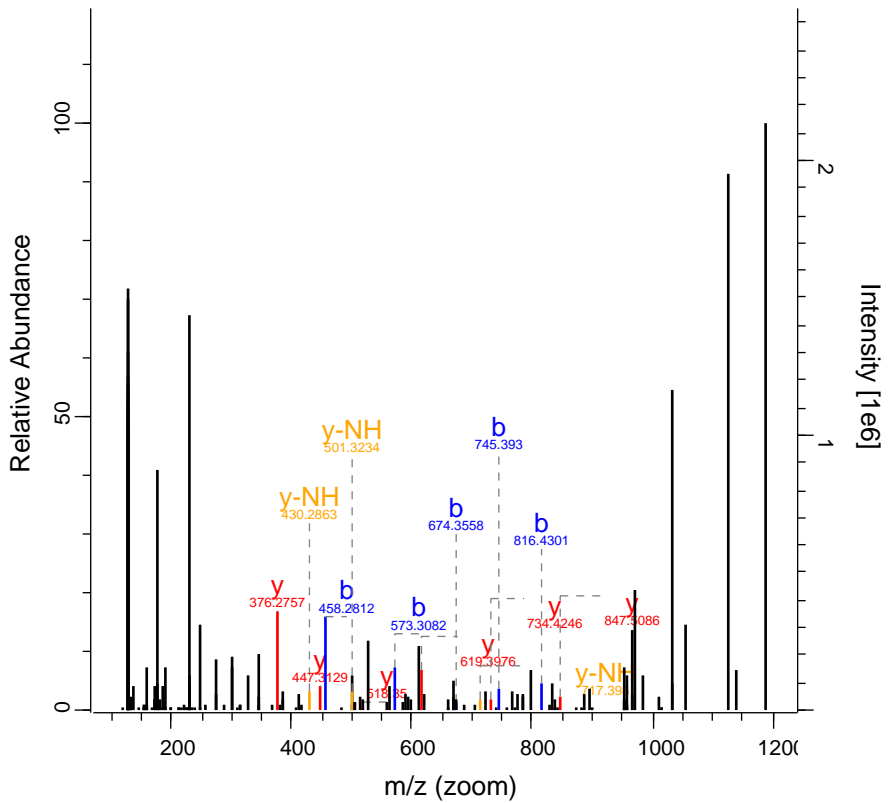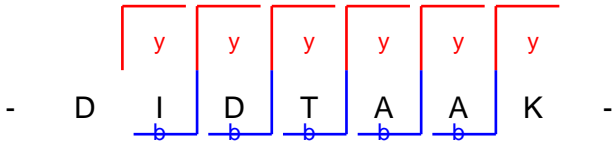

RO-QC-160121\_ZackD\_SS\_Set\_01\_Fraction 12398 FTMS; HC 96.41 718.35 R3HCC1L

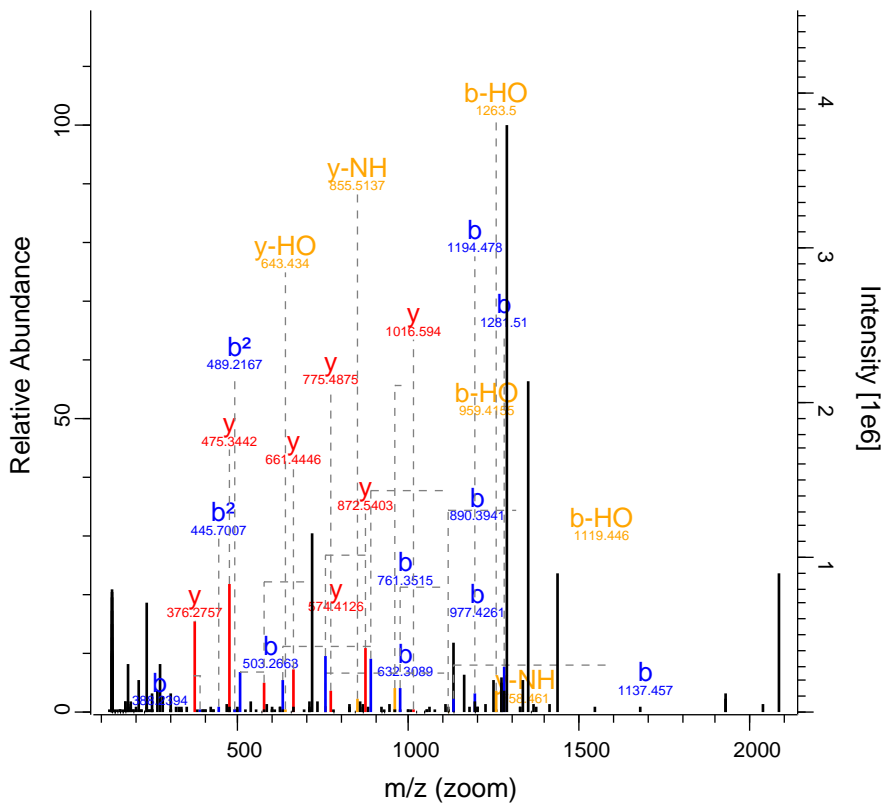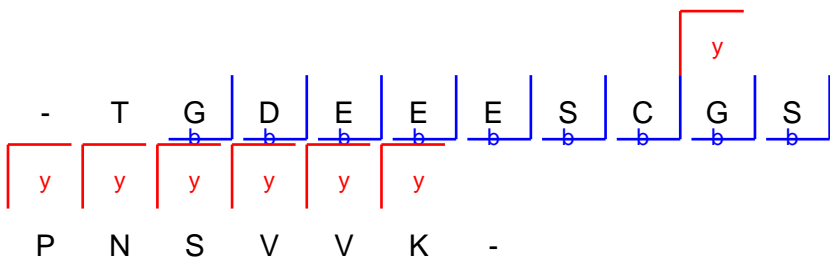

RO-QC-160121\_ZackD\_SS\_Set\_01\_Fraction1 12572 FTMS; HCl96.25 379.9 FRMD4B

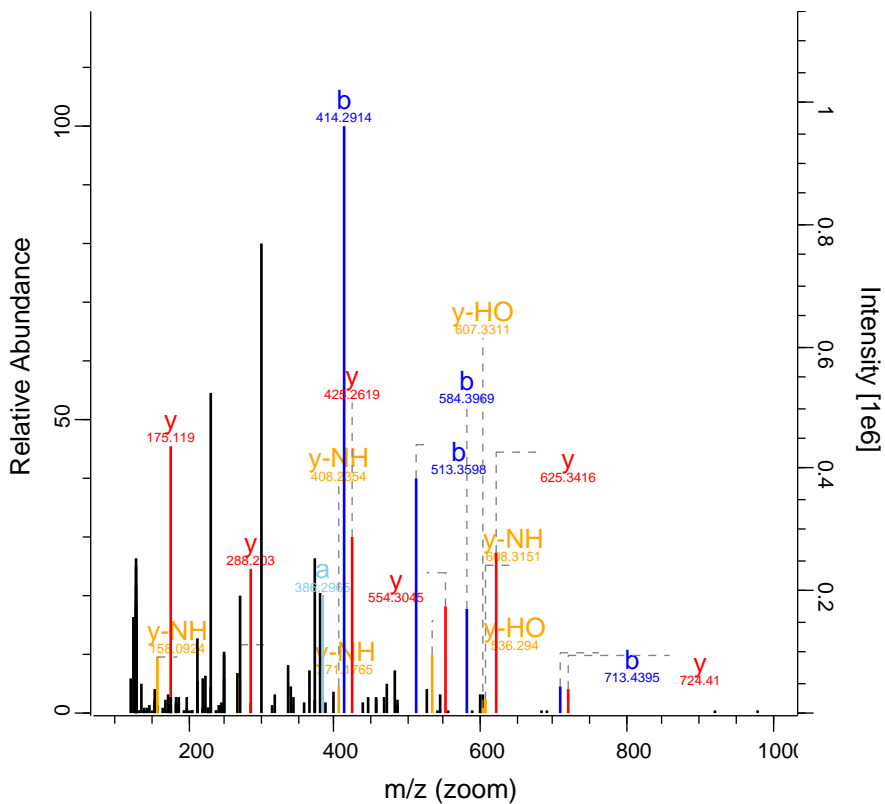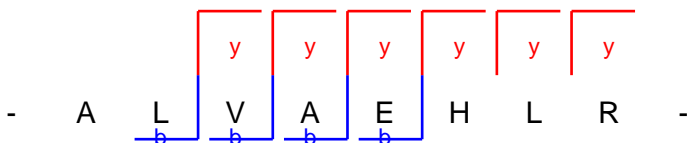

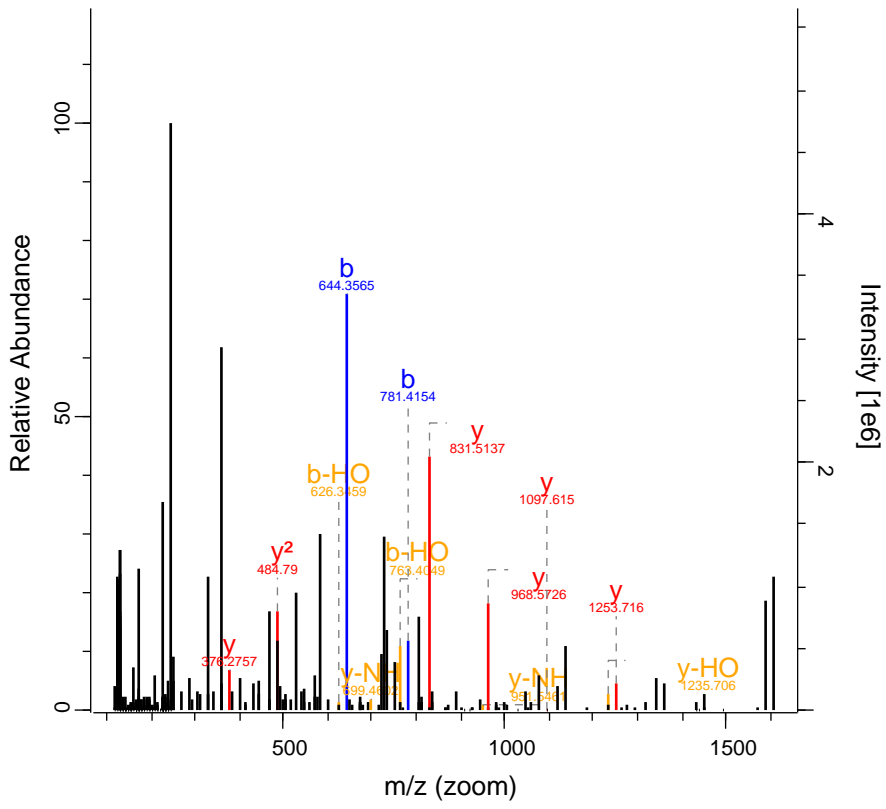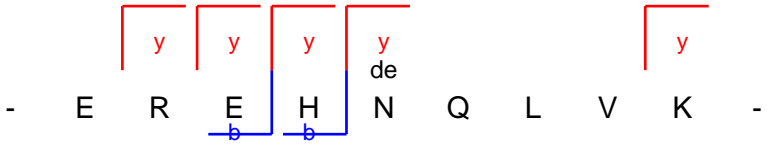

RO-QC-160121\_ZackD\_SS\_Set\_01\_Fraction 13243 FTMS; HC 97.74 714.86 FRAS1

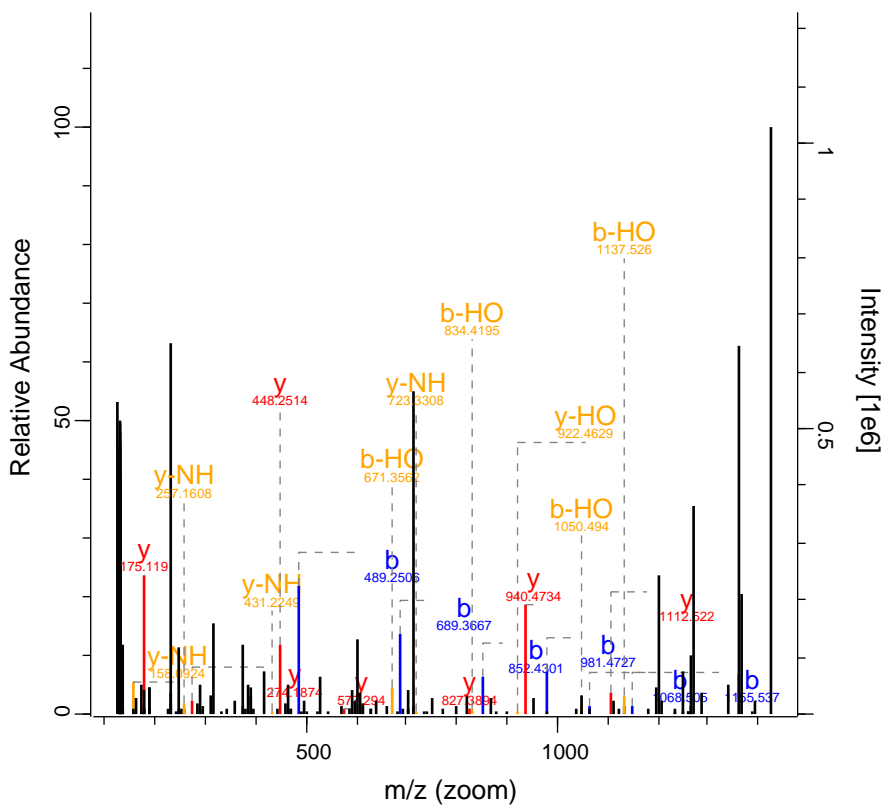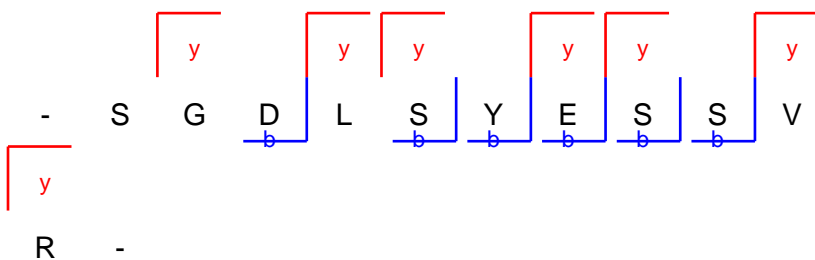

RO-QC-160121\_ZackD\_SS\_Set\_01\_Fraction 13733 FTMS; HC 99.28 569.36 RIC8B

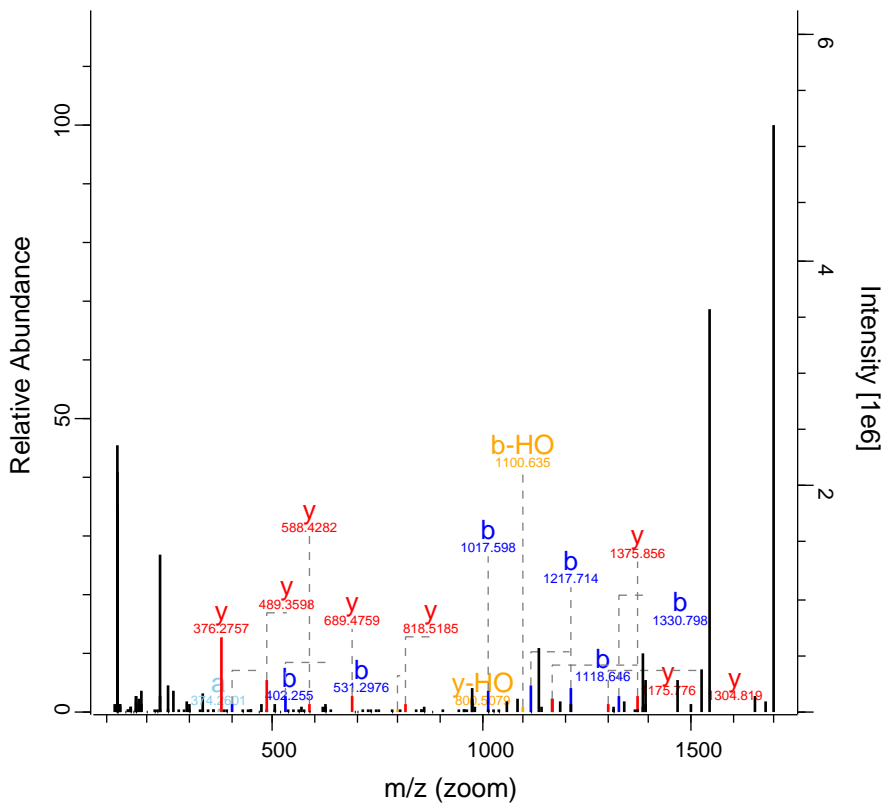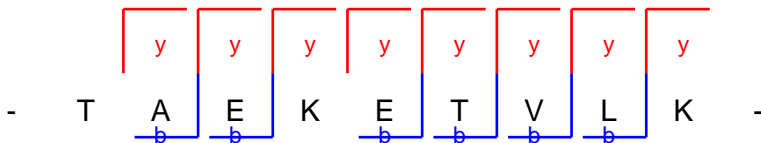



RO-QC-160121\_ZackD\_SS\_Set\_01\_Fractio 14924 FTMS; HC 121.93 763.88 FCF1

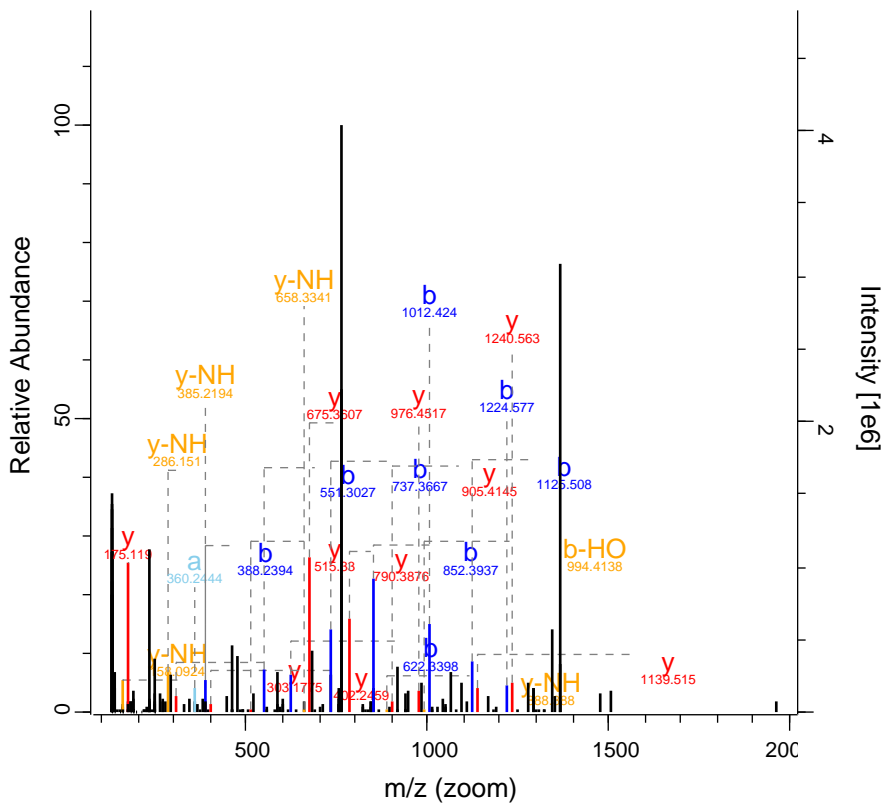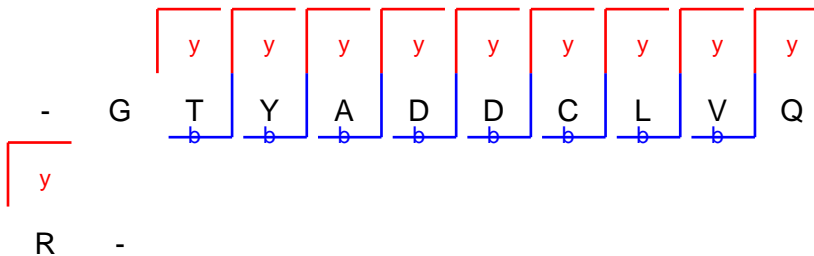

RO-QC-160121\_ZackD\_SS\_Set\_01\_Fraction 15160 FTMS; HC 40.02 466.51 GPR124

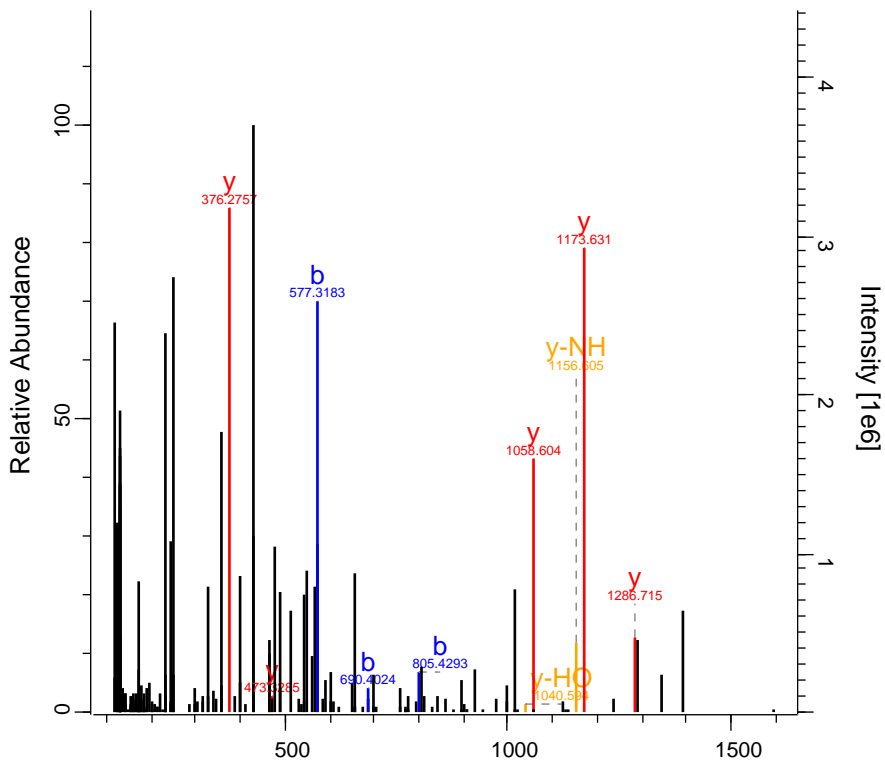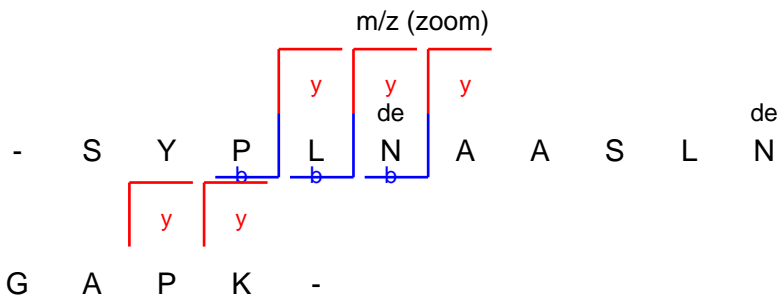

RO-QC-160121\_ZackD\_SS\_Set\_01\_Fractio 15470 FTMS; HC 103.69 441.94 DALRD3

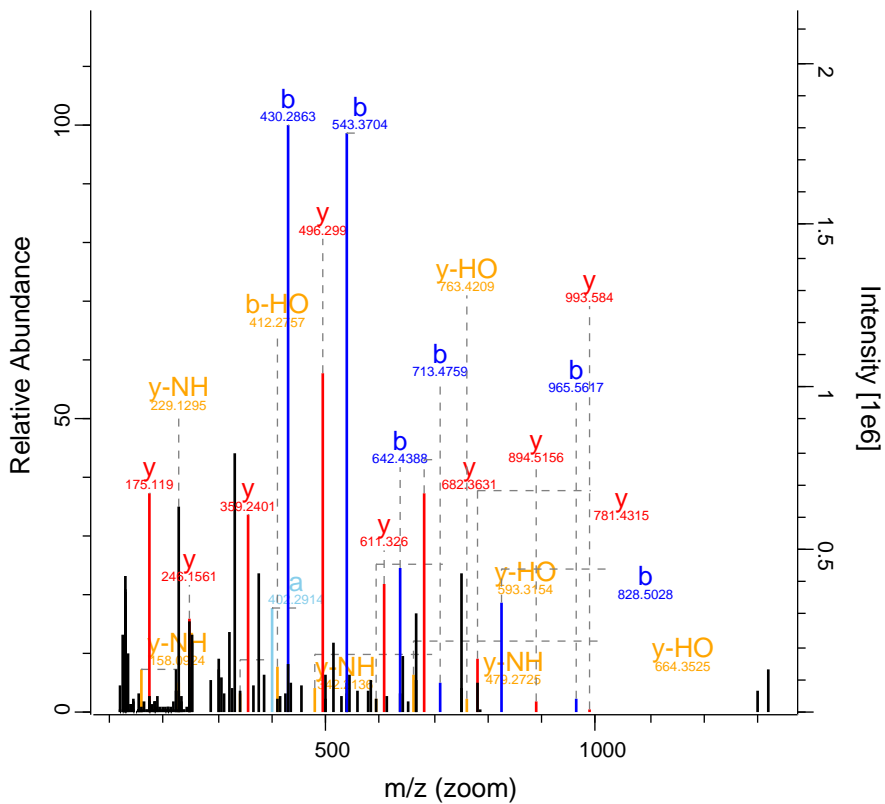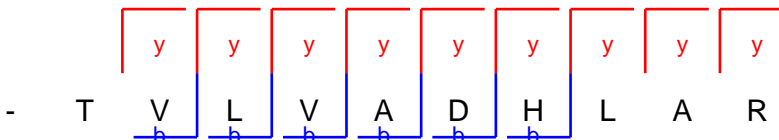

RO-QC-160121\_ZackD\_SS\_Set\_01\_Fraction 15513 FTMS; HC 93.1 538.32 ATP5SL

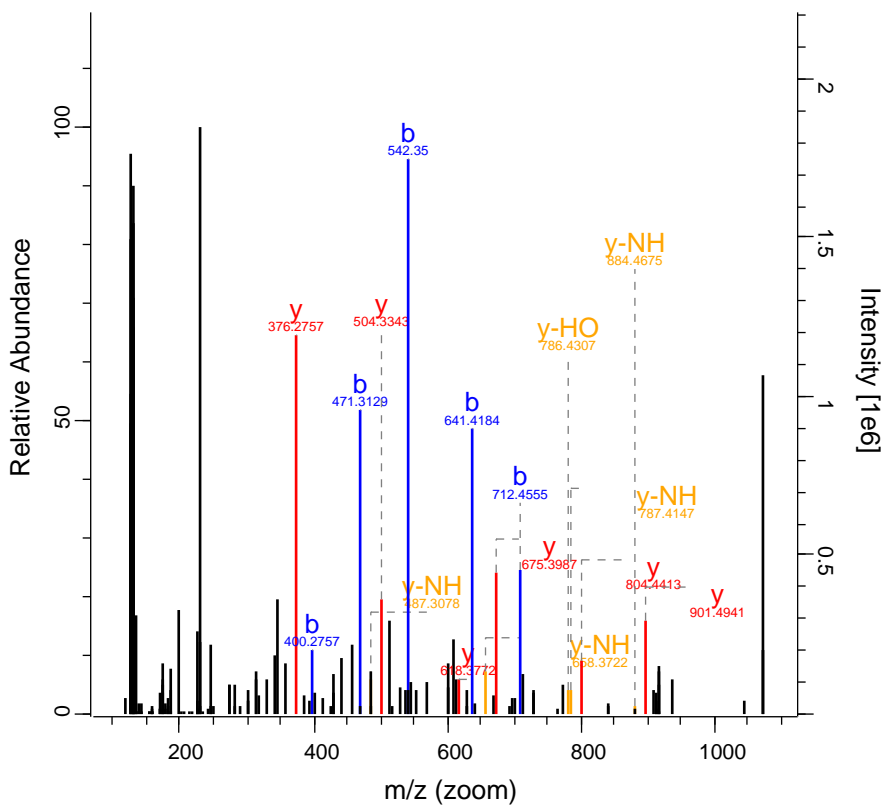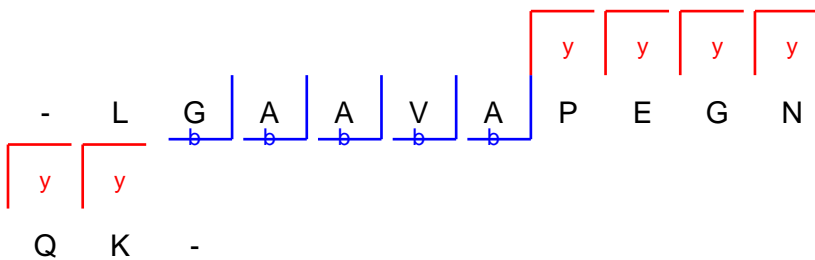

RO-QC-160121\_ZackD\_SS\_Set\_01\_Fraction 15576 FTMS; HC 72.2 538.65 ATP5SL

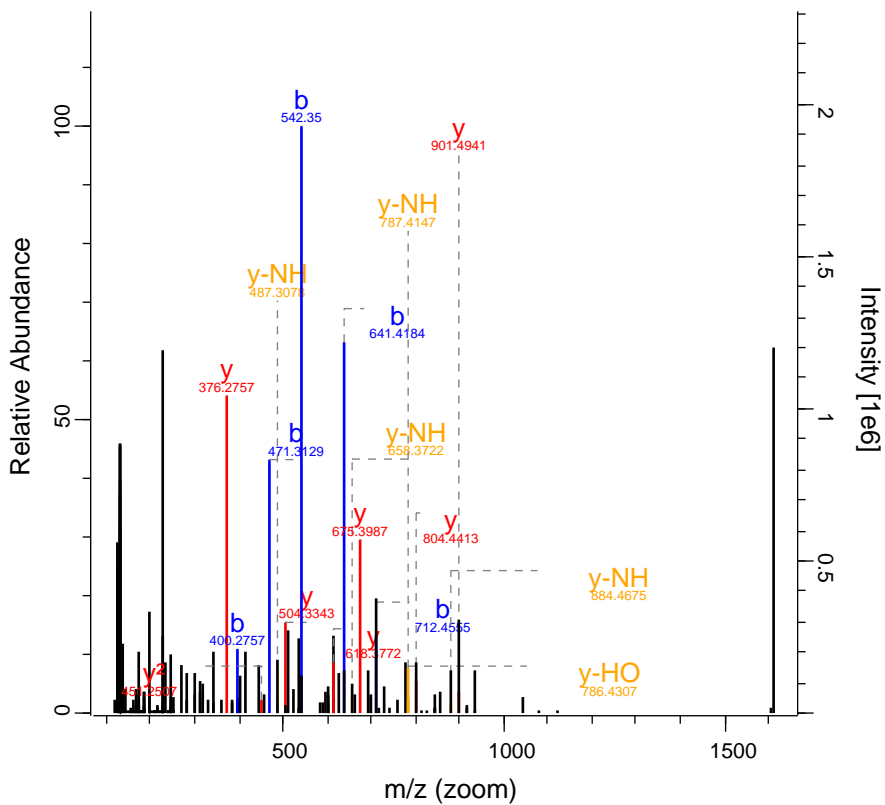

Raw File

Scan Method Score m/z

RO-QC-160121\_ZackD\_SS\_Set\_01\_Fraction\_6

15578 FTMS; HCD 50.7 680.34

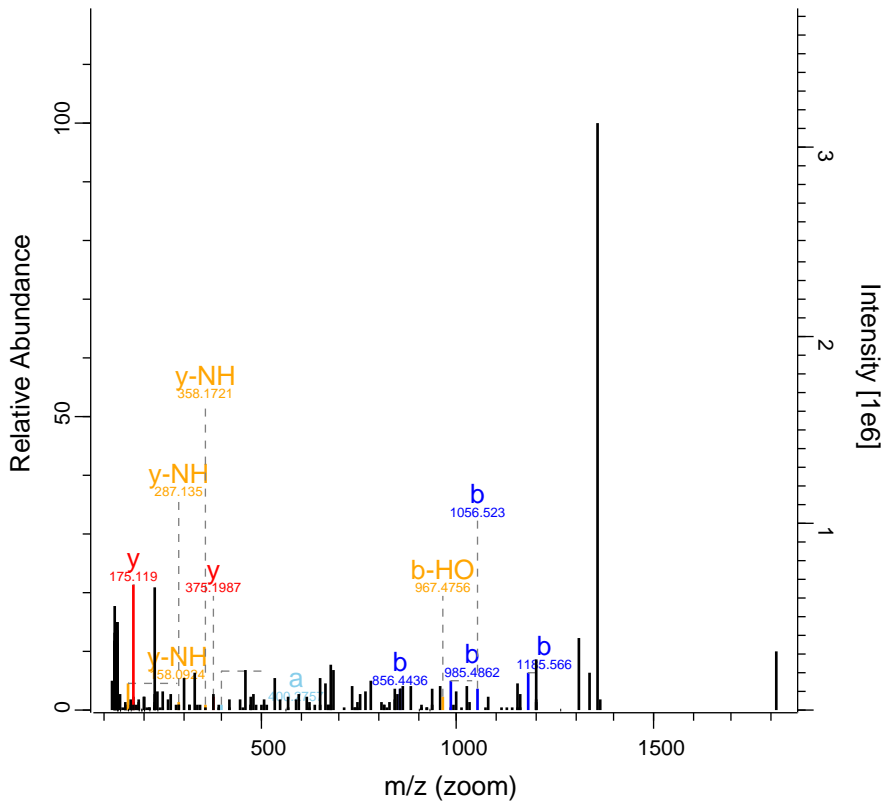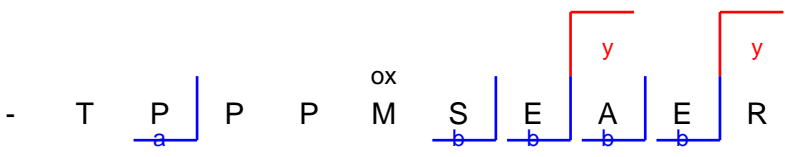

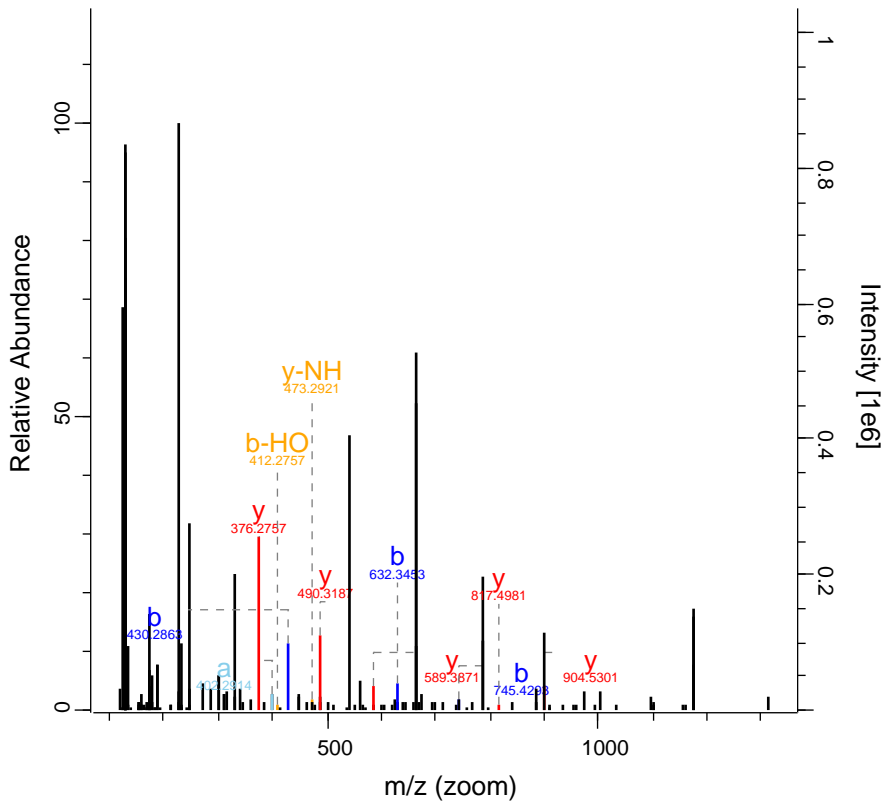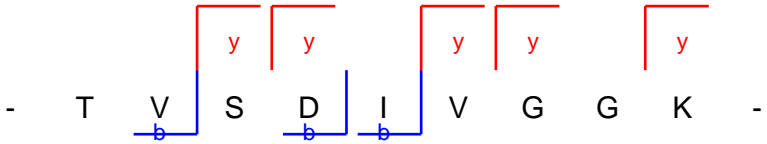

RO-QC-160121\_ZackD\_SS\_Set\_01\_Fractio 16650 FTMS; HC 100.77 760.73 ZFYVE27

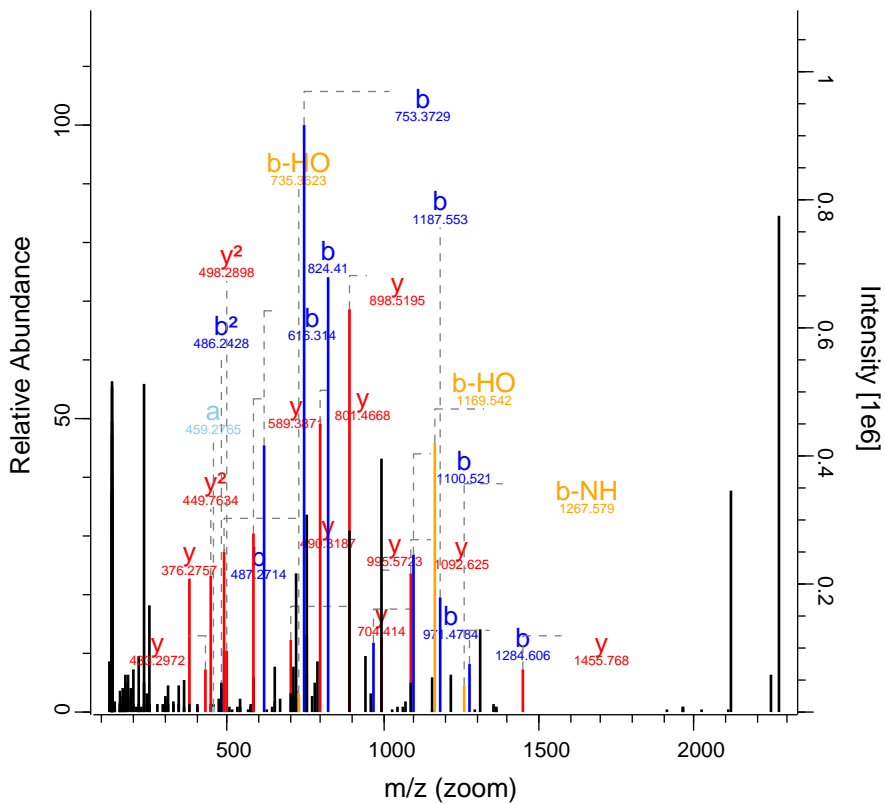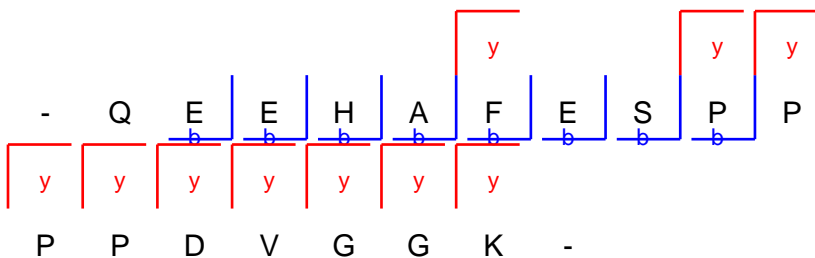



RO-QC-160121\_ZackD\_SS\_Set\_01\_Fractio 16914 FTMS; HC 141.55 484.83 CLIP4

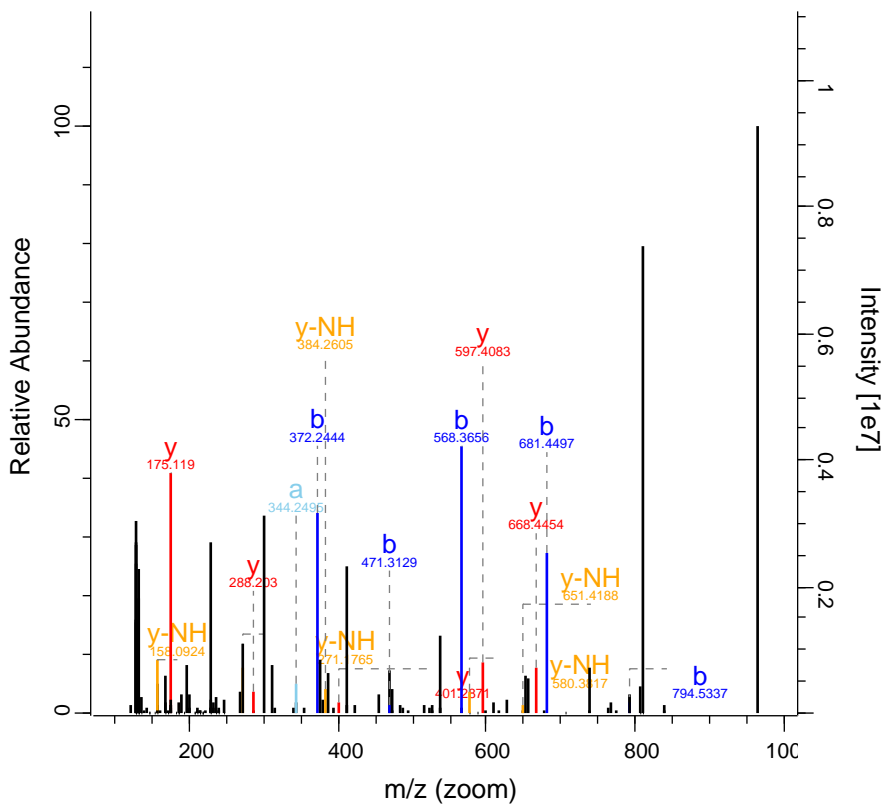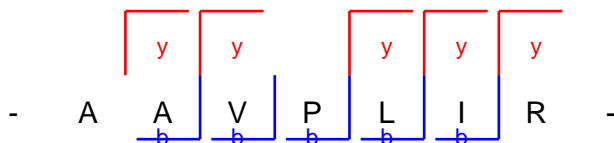

RO-QC-160121\_ZackD\_SS\_Set\_01\_Fractic 16943 FTMS; HC 89.25 1063.53 LRRC8B

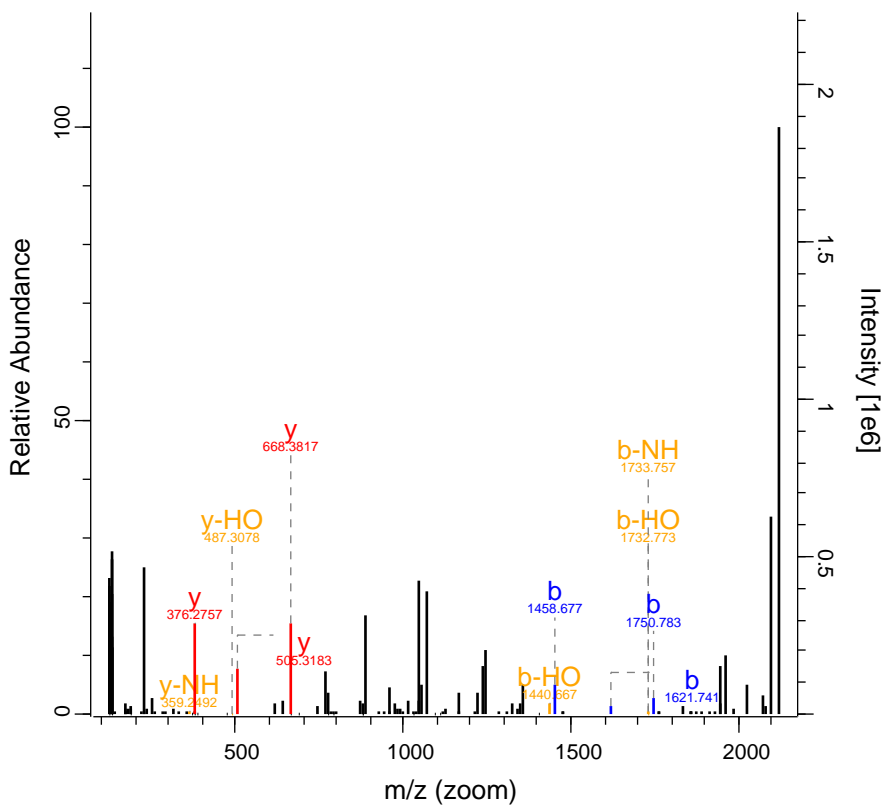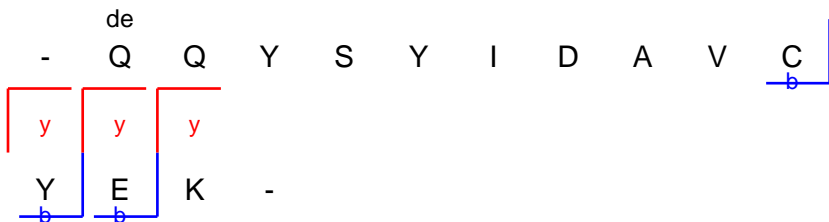

RO-QC-160121\_ZackD\_SS\_Set\_01\_Fraction17577 FTMS; HC 87.31 461.29 IL33

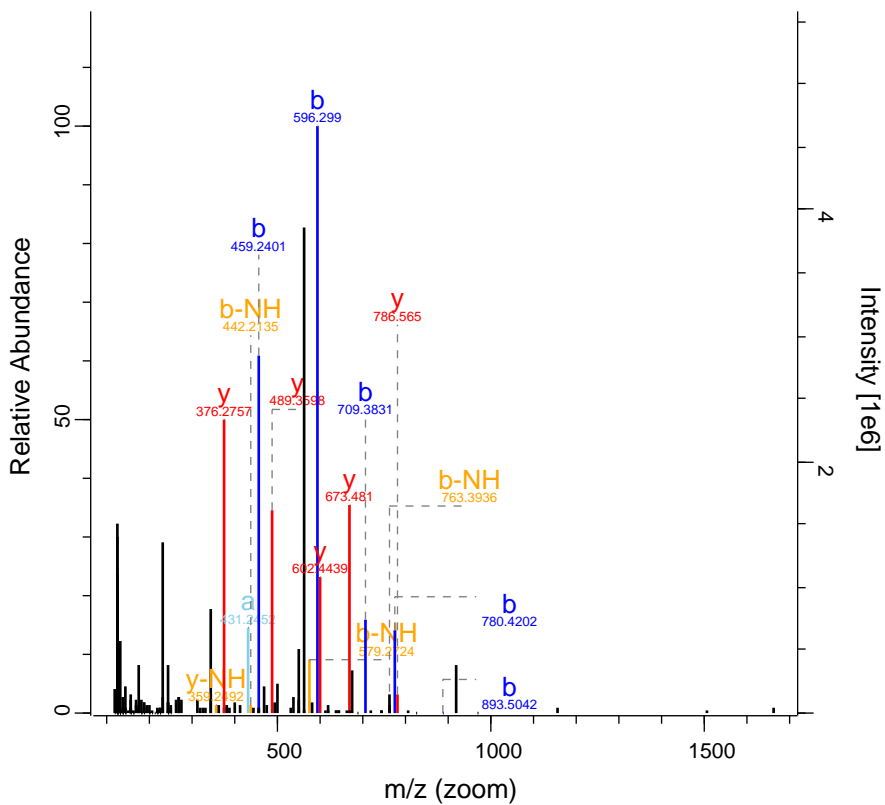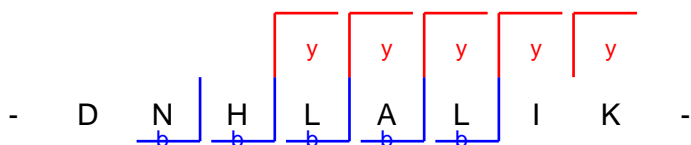





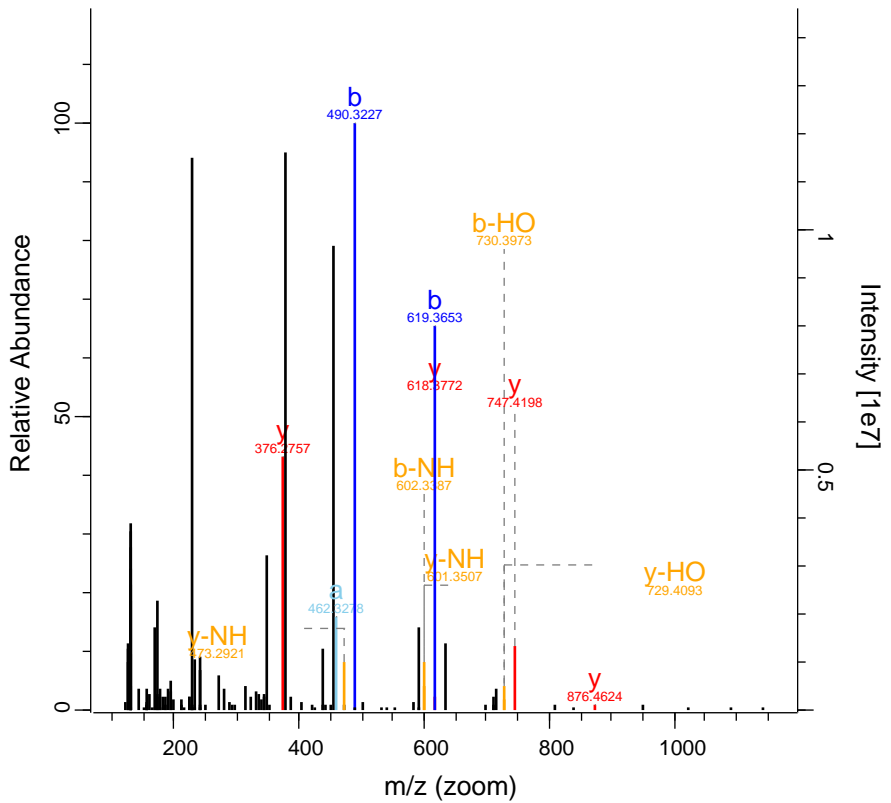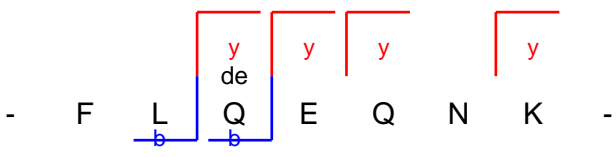

RO-QC-160121\_ZackD\_SS\_Set\_01\_Fractio 18647 FTMS; HC 102.53 980.44 MT-ND3

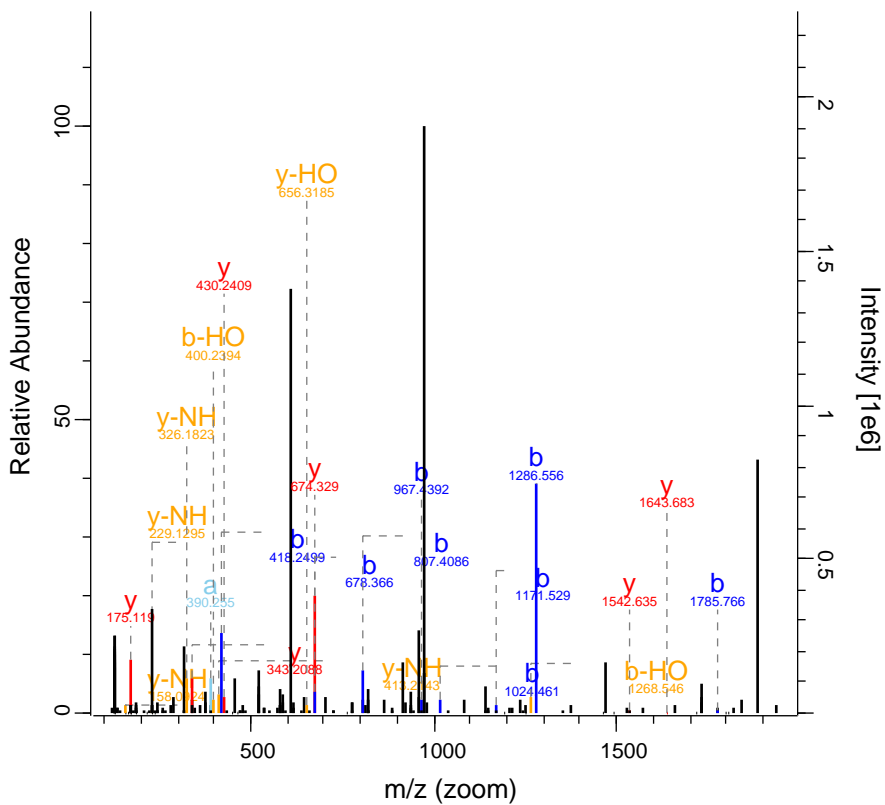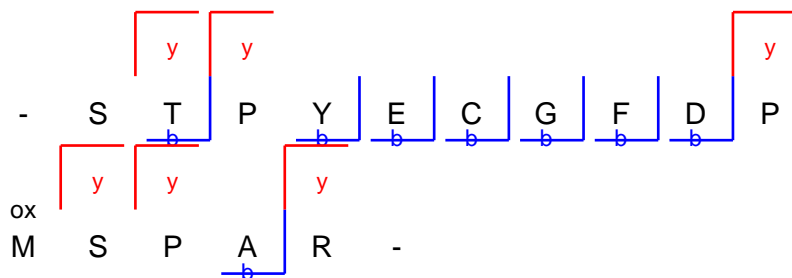

RO-QC-160121\_ZackD\_SS\_Set\_01\_Fraction 18704 FTMS; HC 57.97 653.97 MT-ND3

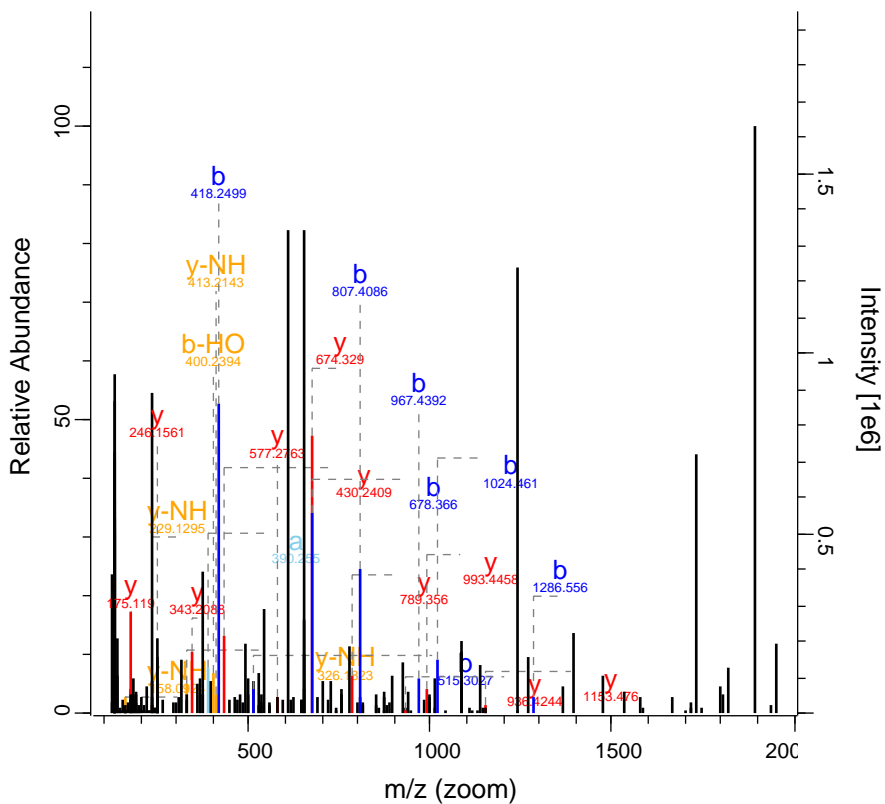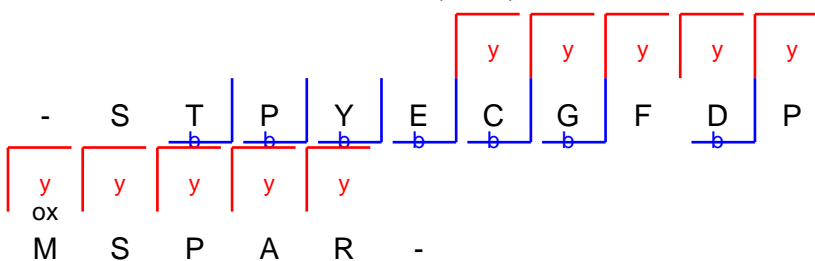



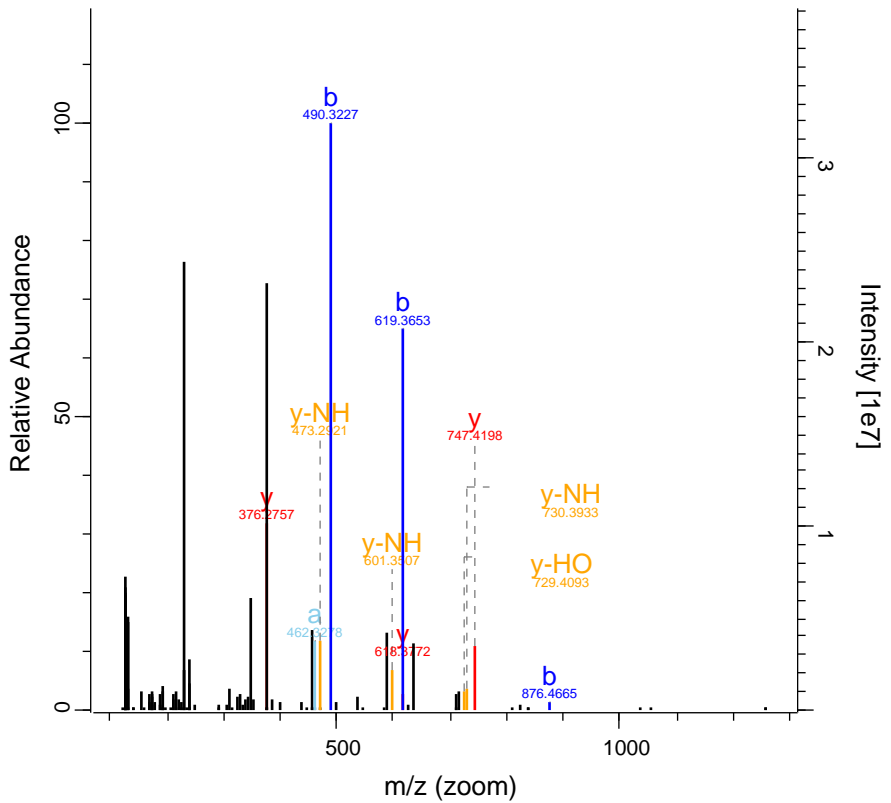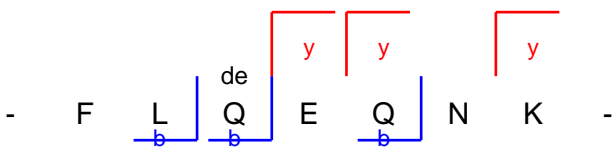

RO-QC-160121\_Z 16 FTN 8141 USP17L1;USP17L24;USP17L20;USP17L19;USP17L17;USP1

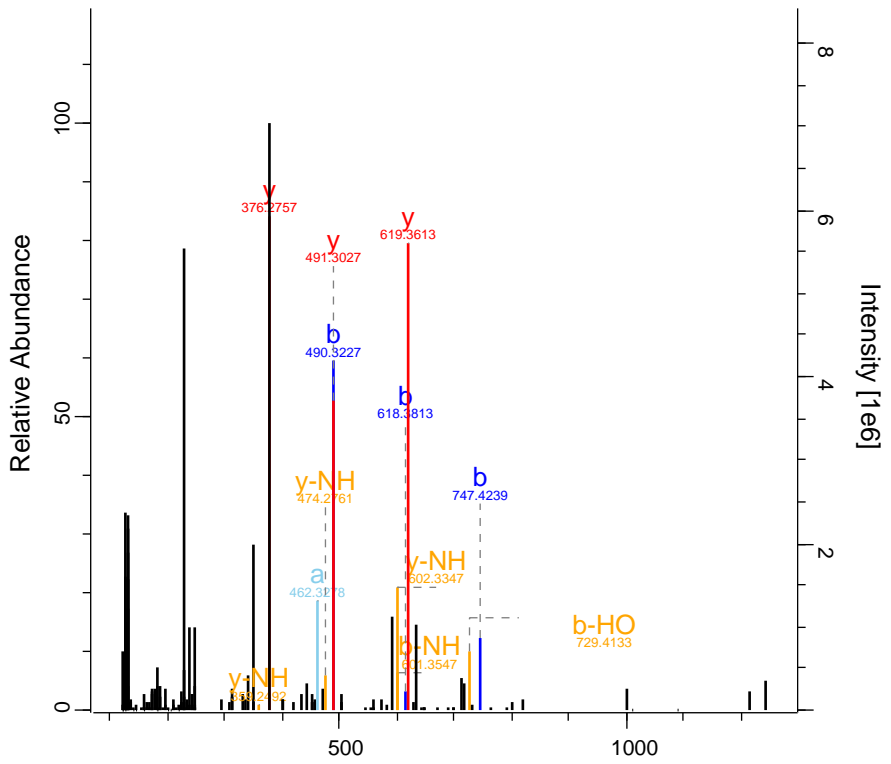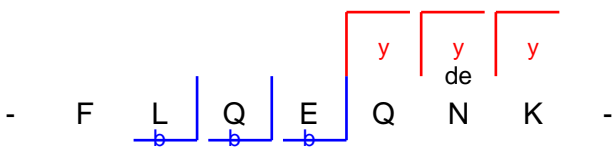

RO-QC-160121\_ZackD\_SS\_Set\_01\_Fraction 19166 FTMS; HC 83.31 807.41 YIPF6

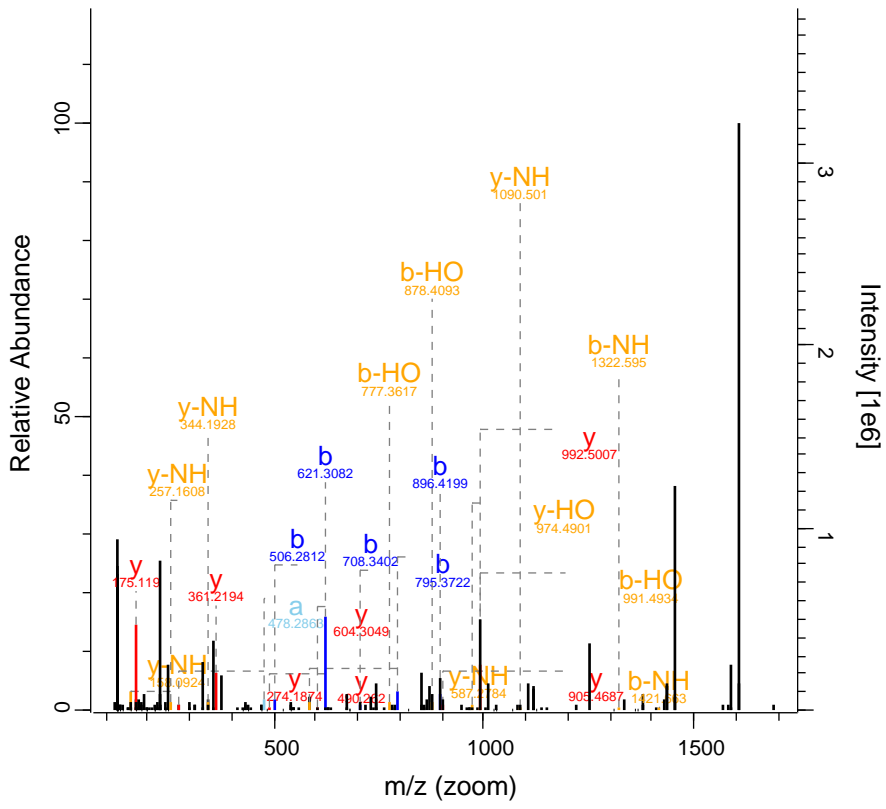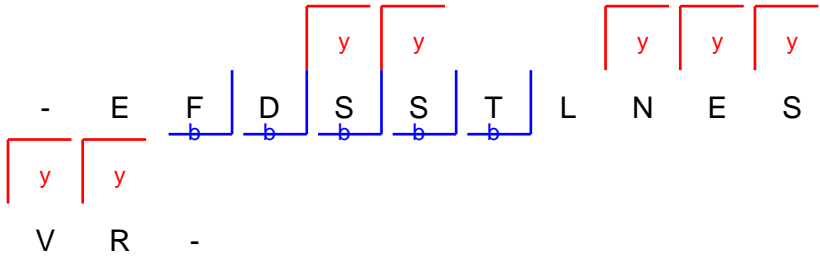

VLRNES

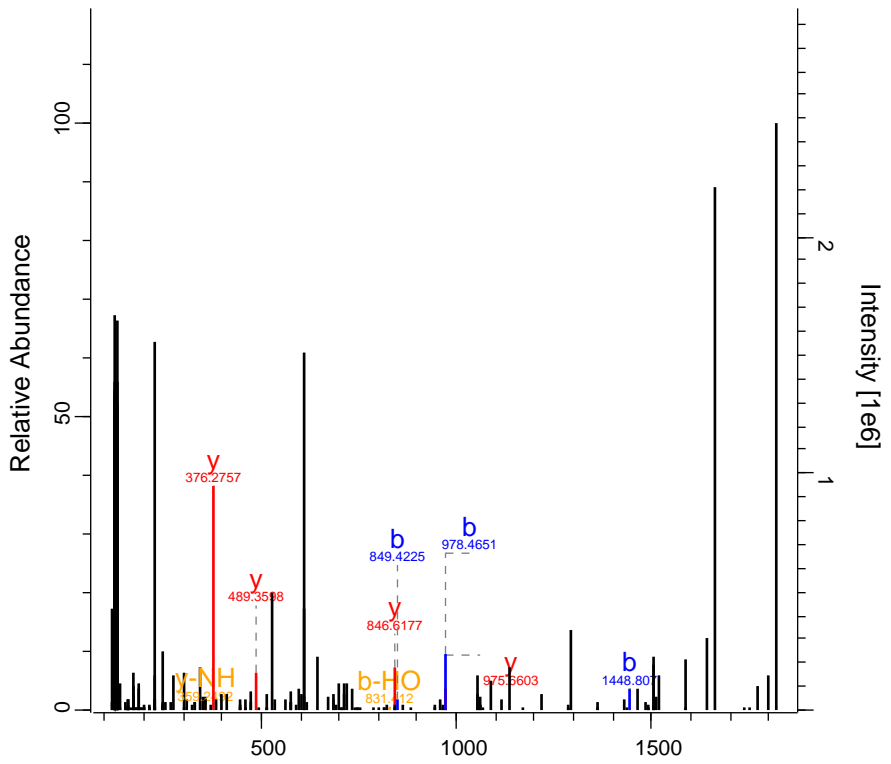

m/z (zoom)

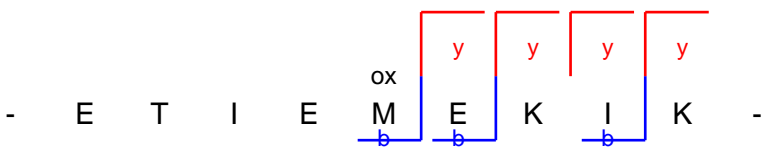

RO-QC-160121\_ZackD\_SS\_Set\_01\_Fraccio 19470 FTMS; HC 115.06 748.88 CES2

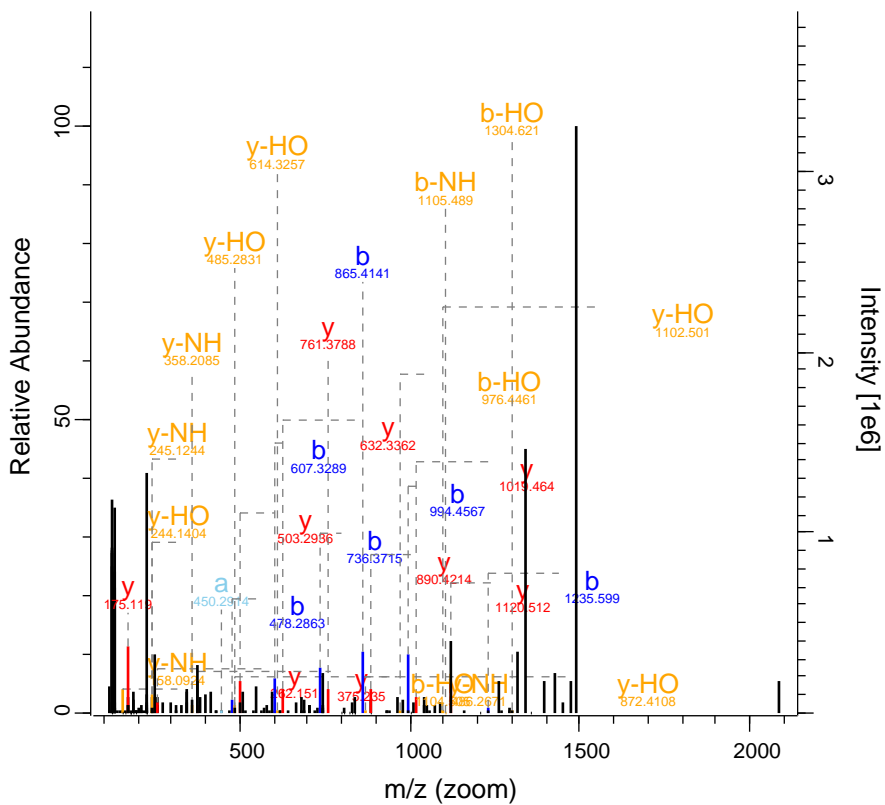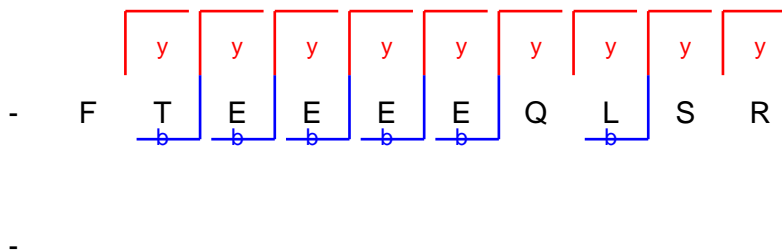

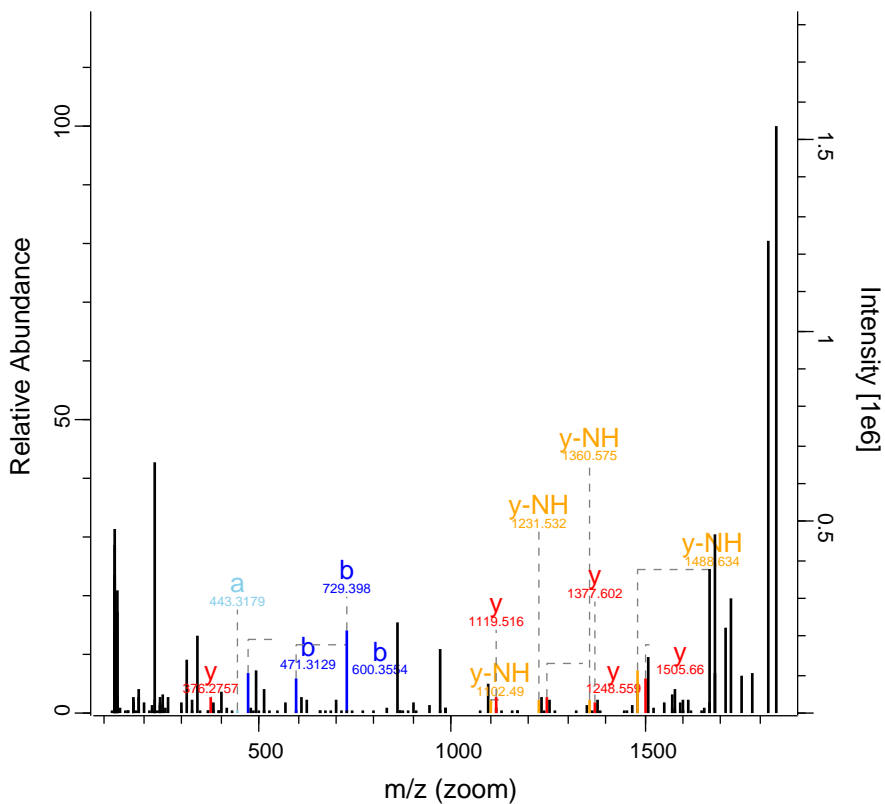

m/z (zoom)

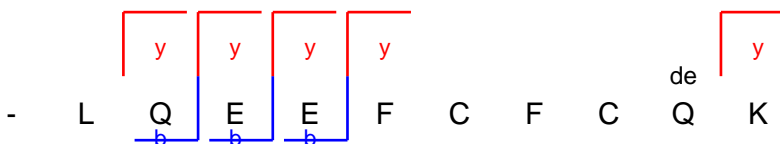

RO-QC-160121\_ZackD\_SS\_Set\_01\_Fractic 21099 FTMS; HC 45.26 1264.15 FSCN3

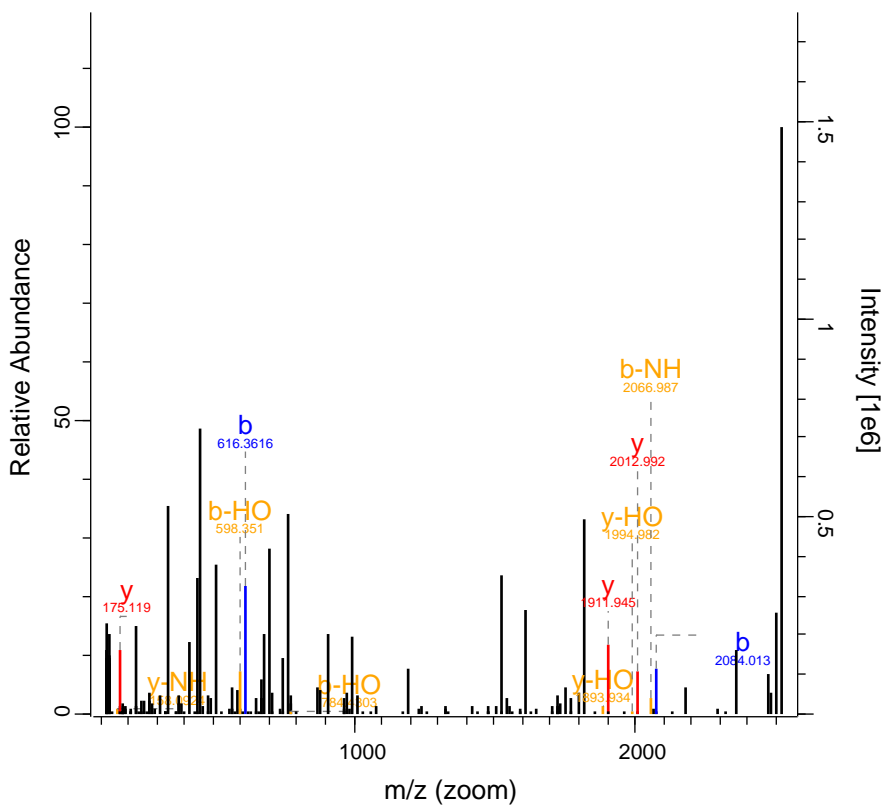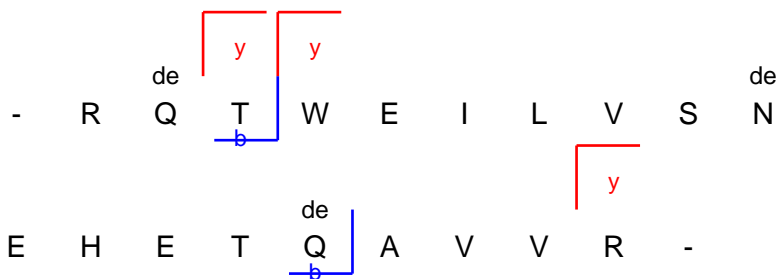





RO-QC-160121\_ZackD\_SS\_Set\_01\_Fractio 21501 FTMS; HC 132.24 935.47 NUDT6

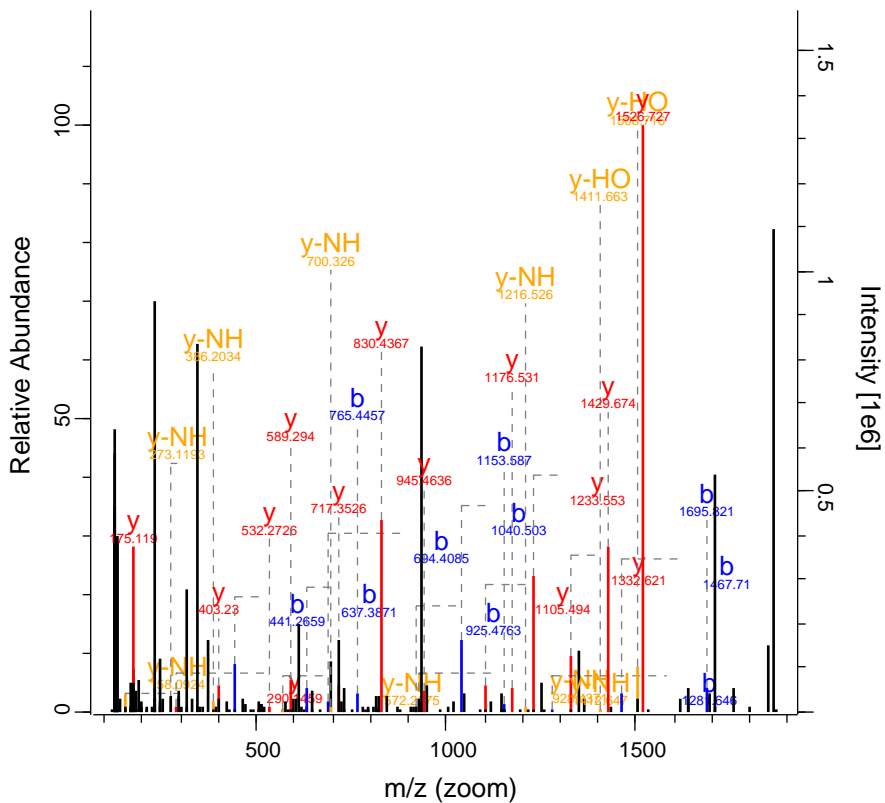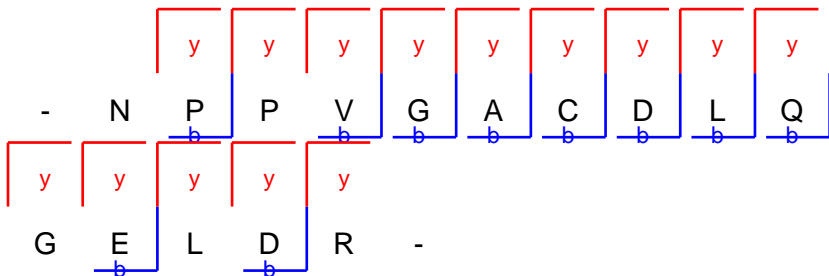

RO-QC-160121\_ZackD\_SS\_Set\_01\_Fraction 21899 FTMS; HC 137 705.41 CLMN

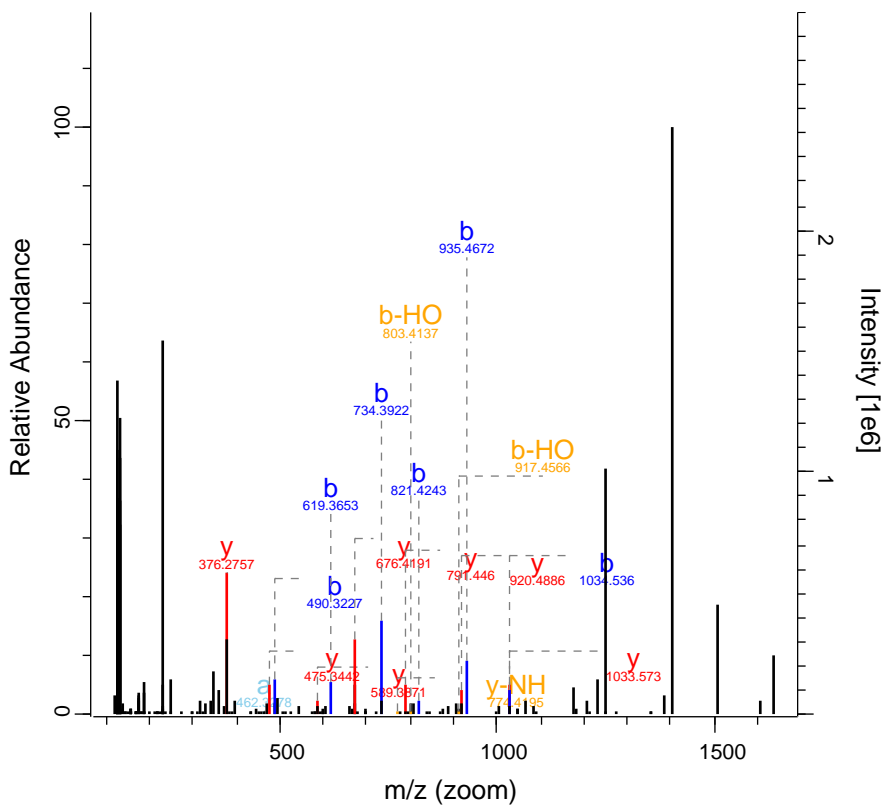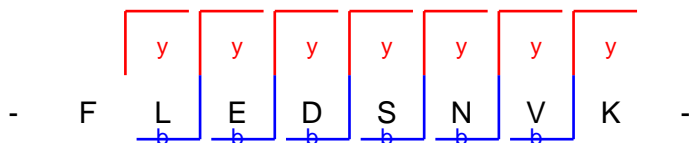

RO-QC-160121\_ZackD\_SS\_Set\_01\_Fractio 22824 FTMS; HC 125.47 600.86 TMEM167A

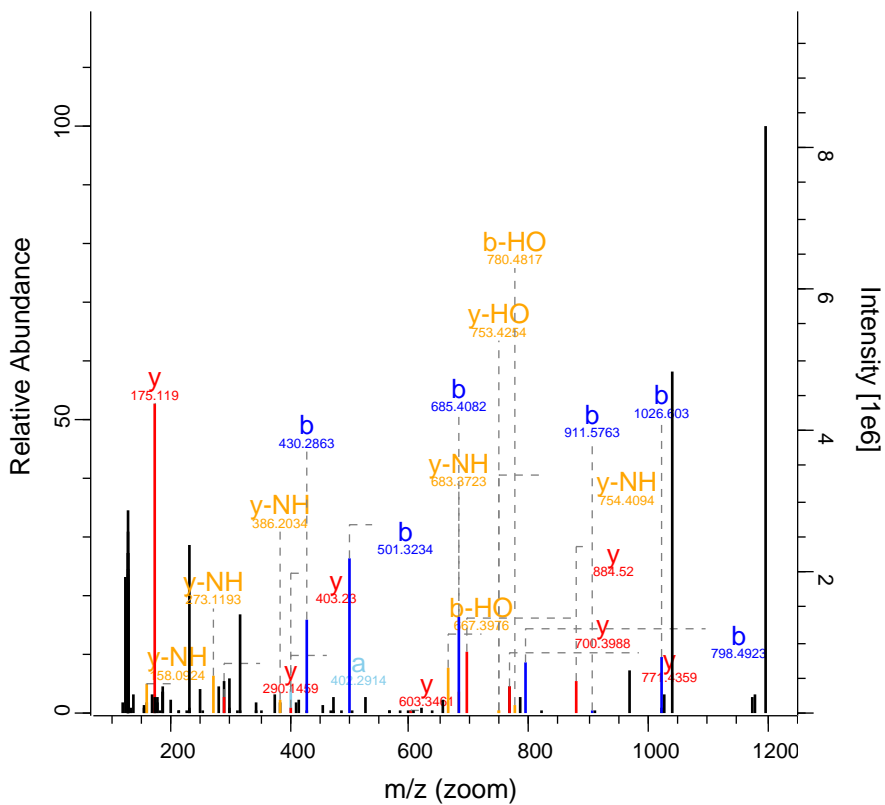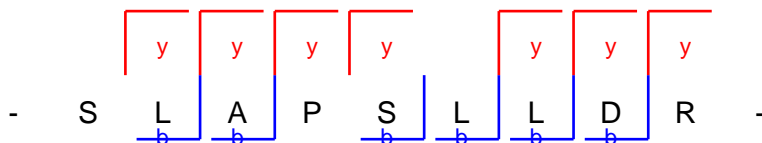

RO-QC-160121\_ZackD\_SS\_Set\_01\_Fractic 22859 FTMS; HC 84.29 1191.64 ATP6V0C

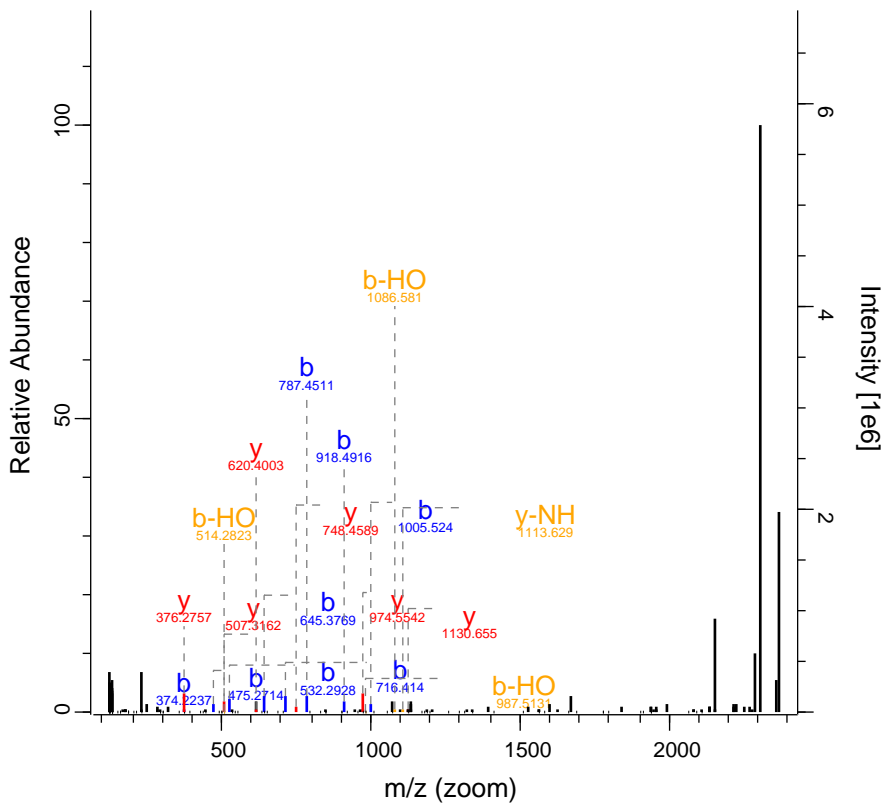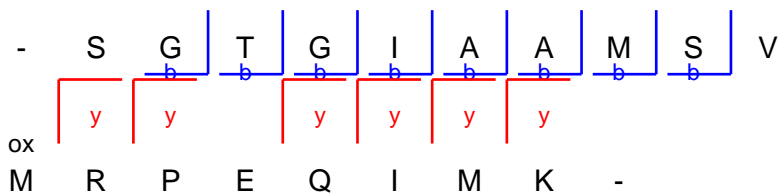

RO-QC-160121\_ZackD\_SS\_Set\_01\_Fraction 22925 FTMS; HC 86.55 794.43 ATP6V0C

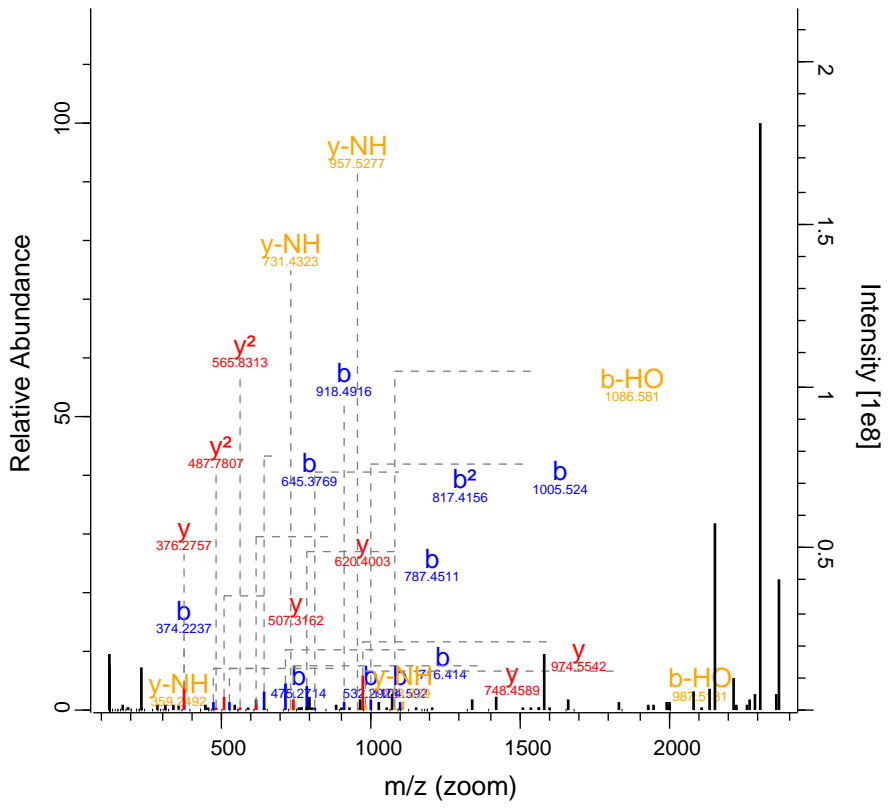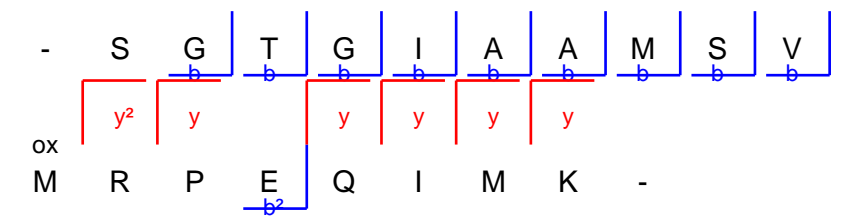

ox  
M

R P E Q I M K -

RO-QC-160121\_ZackD\_SS\_Set\_01\_Fractic 22964 FTMS; HC 84.48 1192.14 ATP6V0C

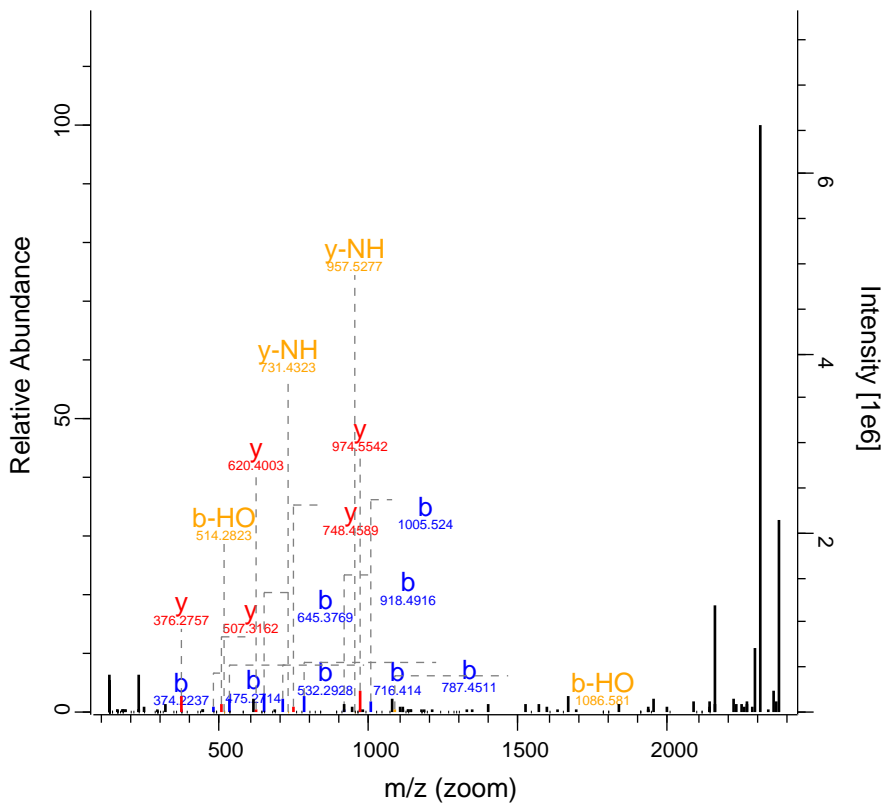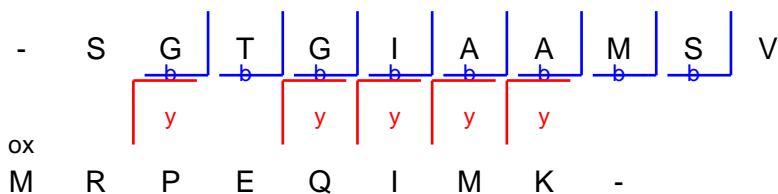

RO-QC-160121\_ZackD\_SS\_Set\_01\_Fraction 23146 FTMS; HC 60.95 794.77 ATP6V0C

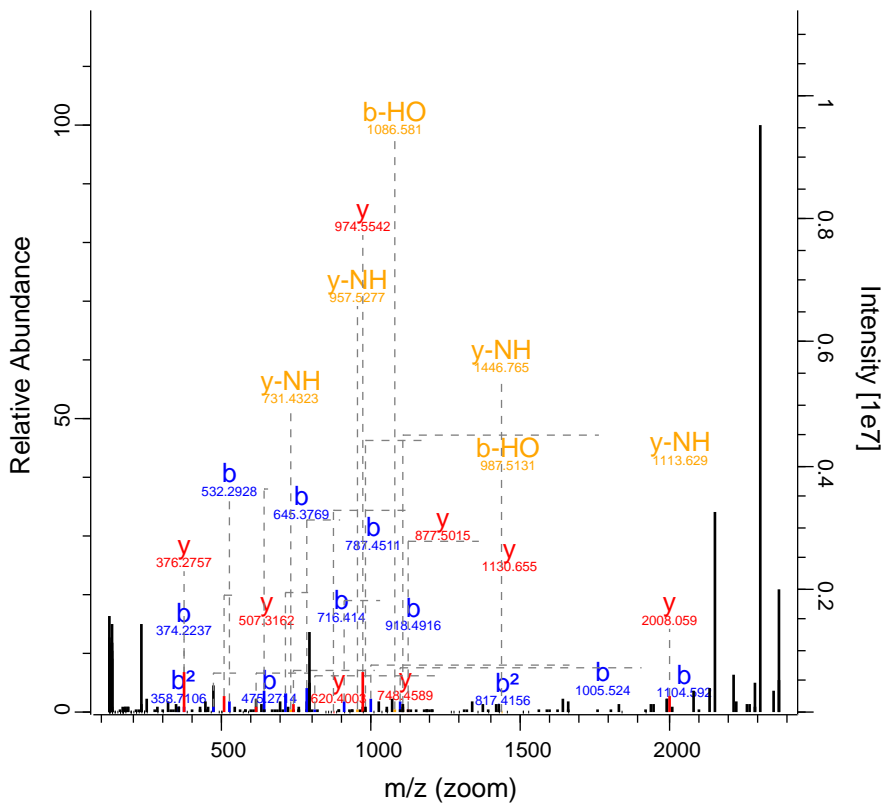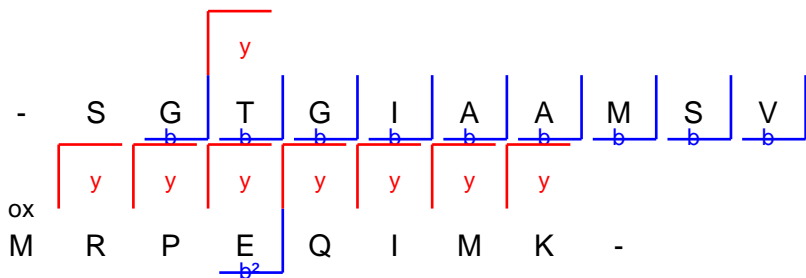

RO-QC-160121\_ZackD\_SS\_Set\_01\_Fraction 23440 FTMS; HCl 96.19 638.4 CABP7

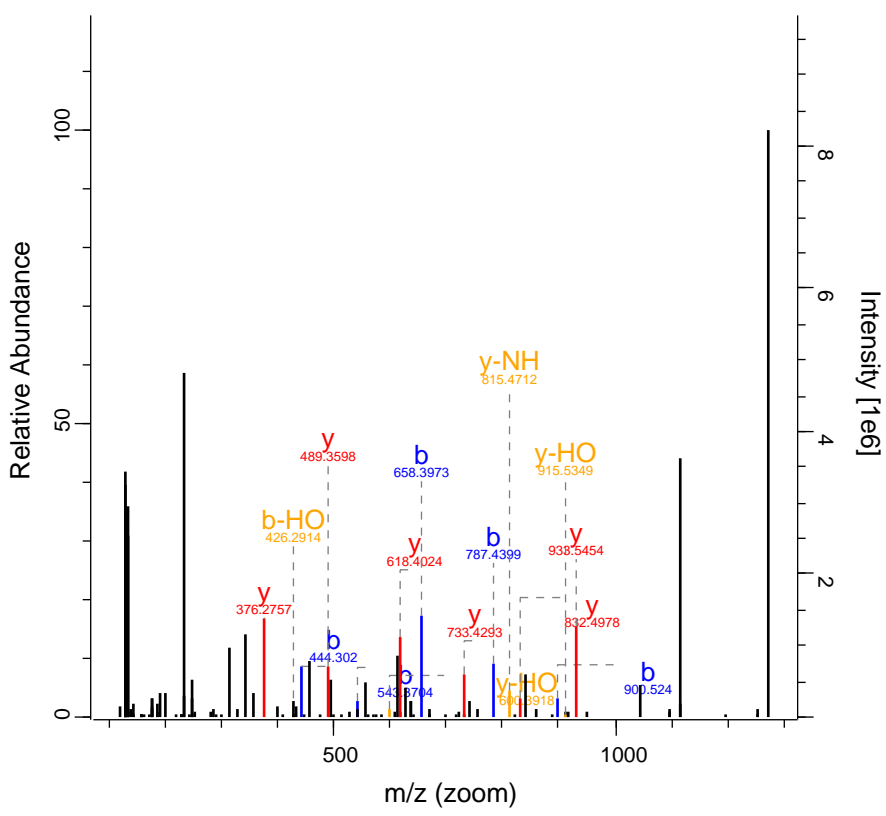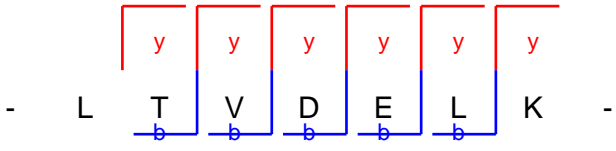



RO-QC-160121\_ZackD\_SS\_Set\_01\_Fractio 23617 FTMS; HC 114.72 425.94 CABP7

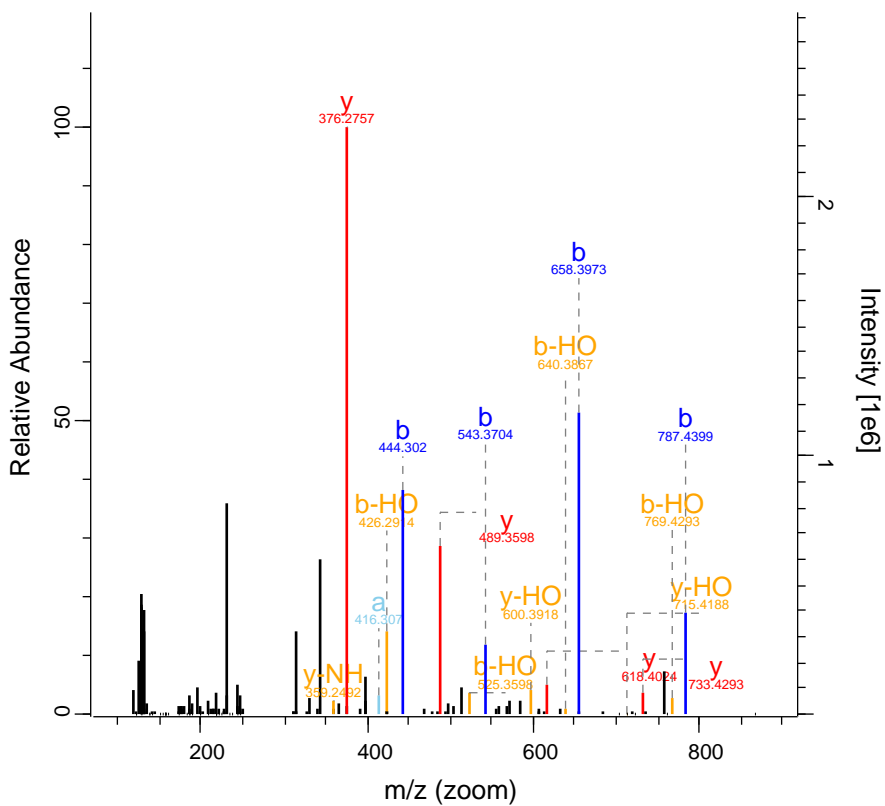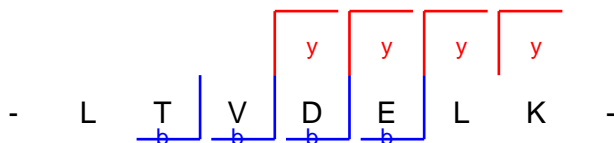

RO-QC-160121\_ZackD\_SS\_Set\_01\_Fraction 23653 FTMS; HCl 116.88 638.4 CABP7

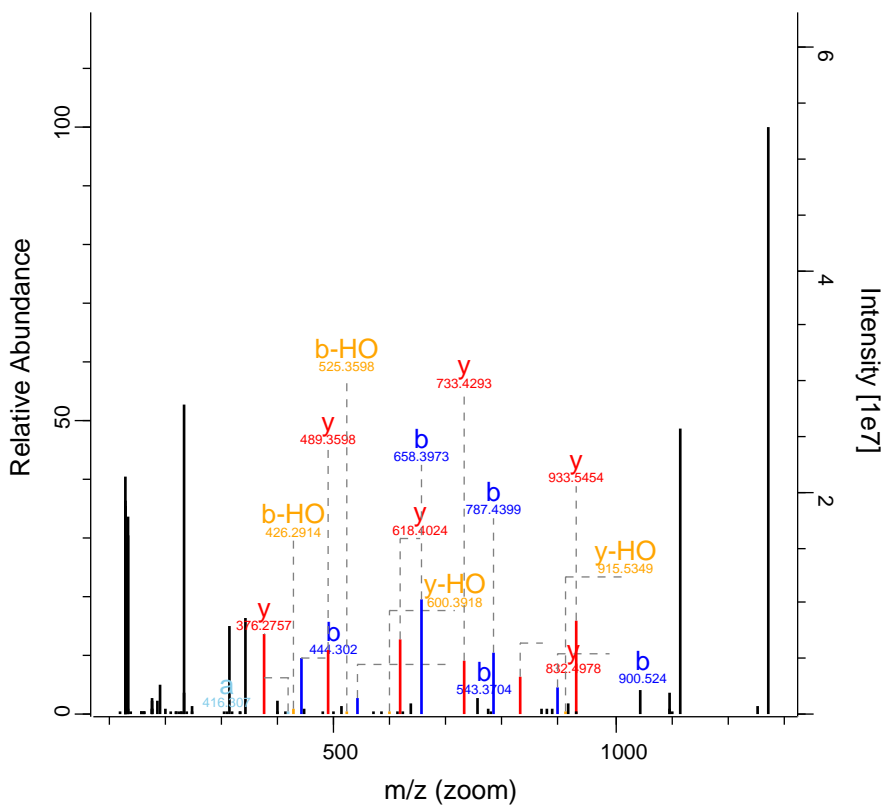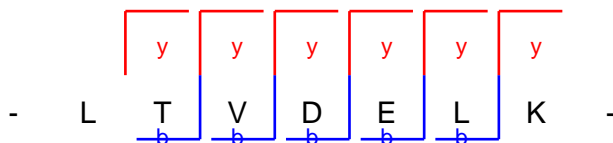

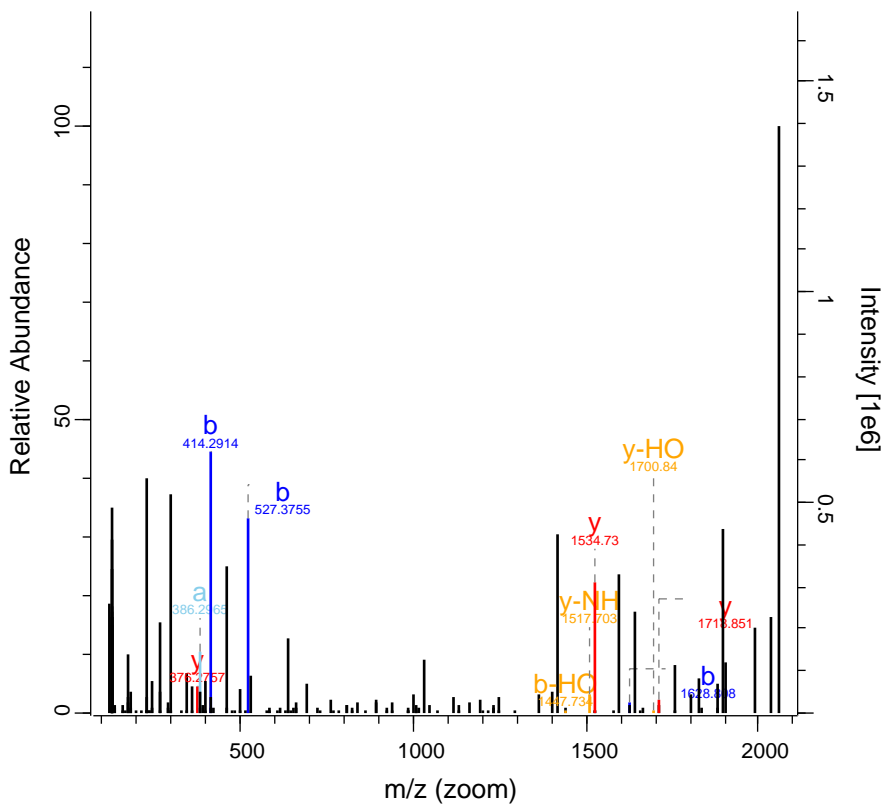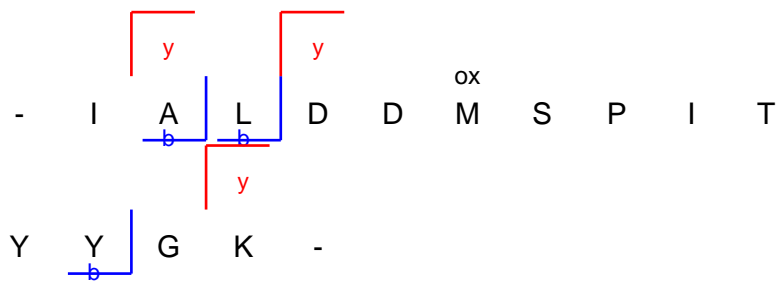

RO-QC-160121\_ZackD\_SS\_Set\_01\_Fractio 24285 FTMS; HC 105.19 618.71 REC8

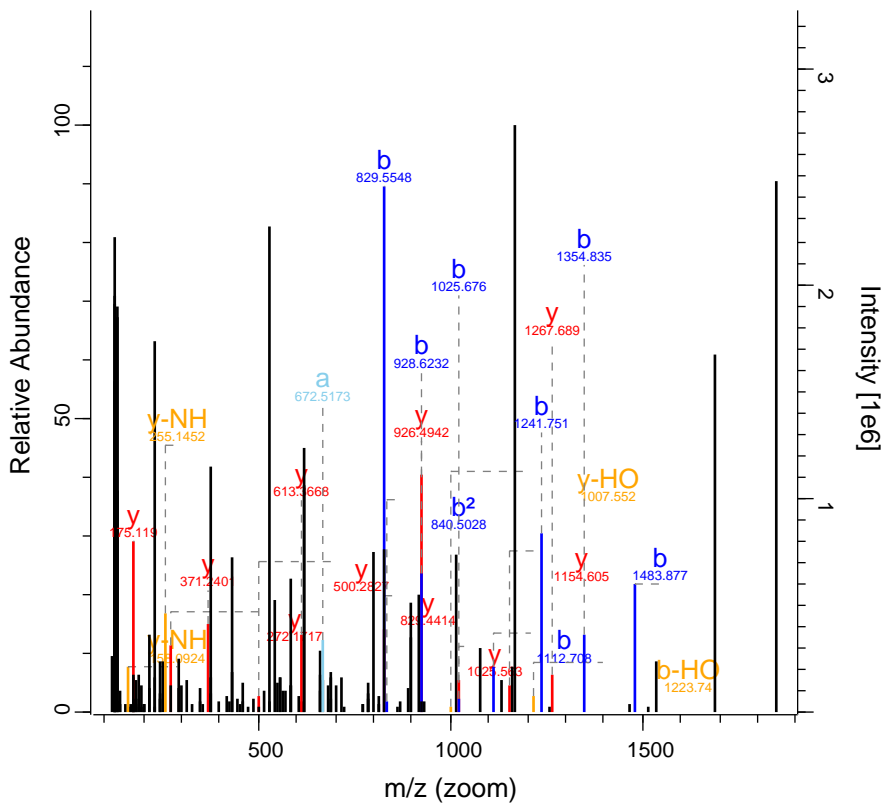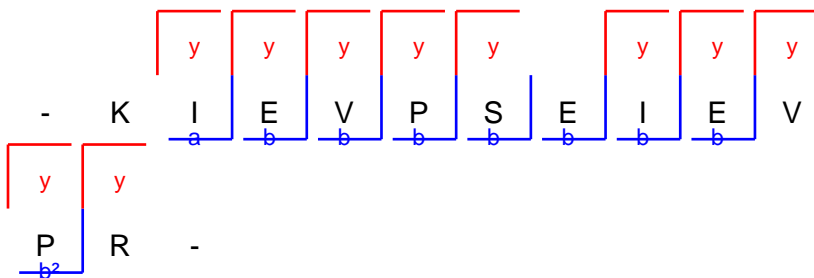

RO-QC-160121\_ZackD\_SS\_Set\_01\_Fractio 26278 FTMS; HC 145.89 893.47 MRPL35

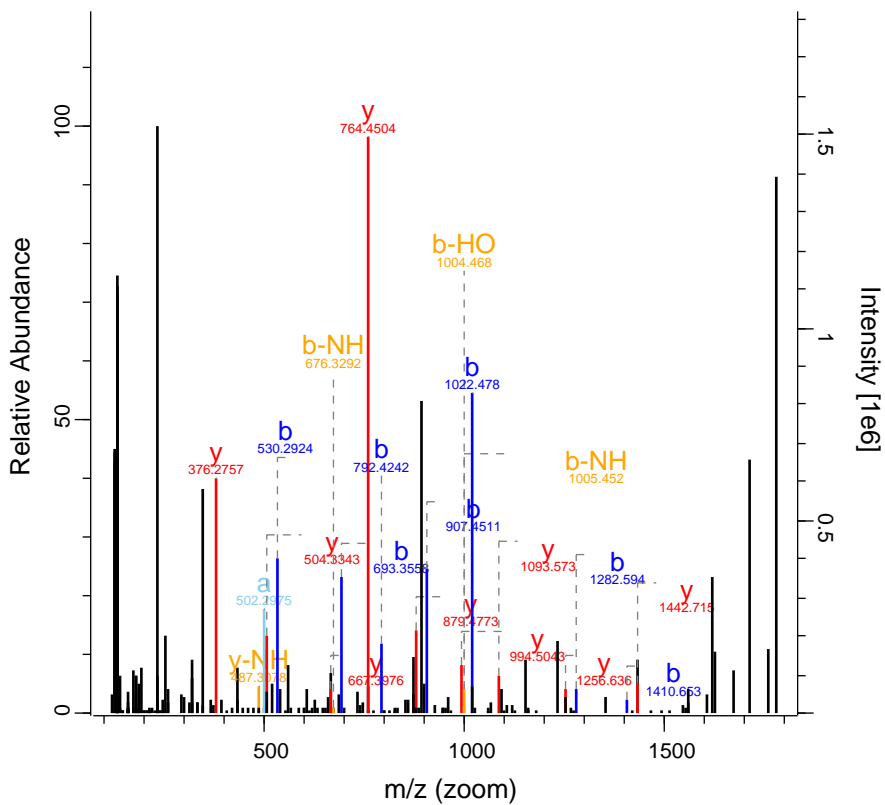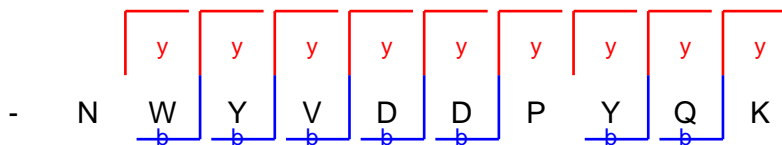

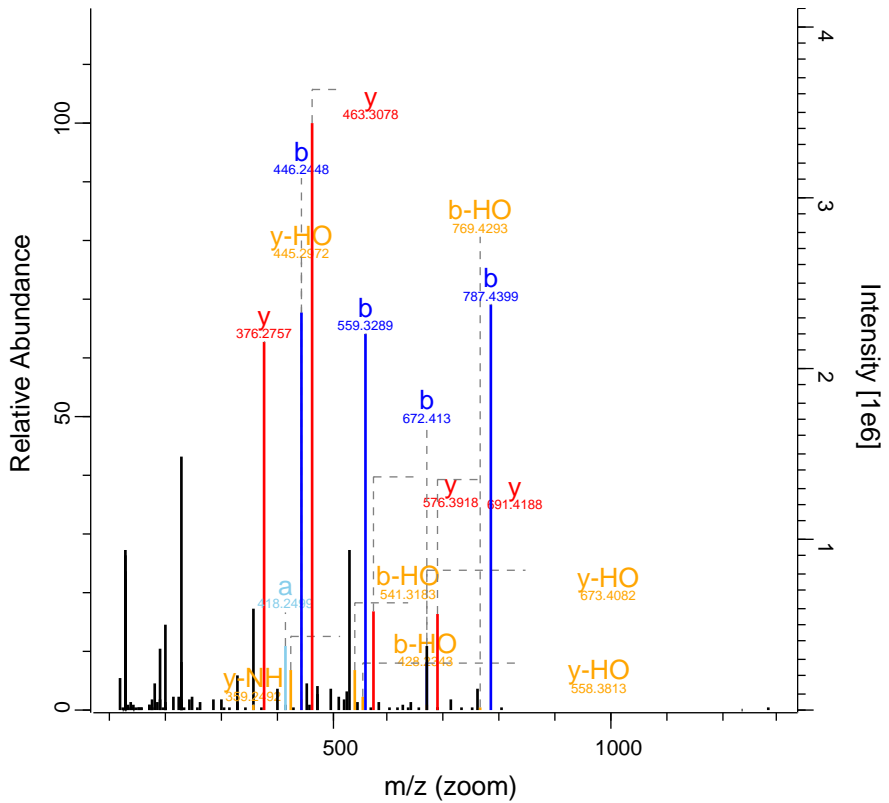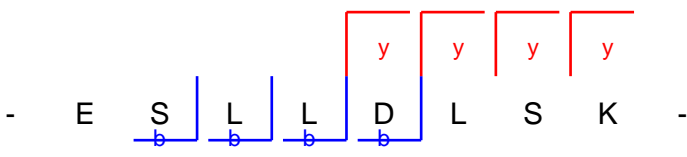

RO-QC-160121\_ZackD\_SS\_Set\_01\_Fraction 26676 FTMS; HC 86.09 405.21 SCTR

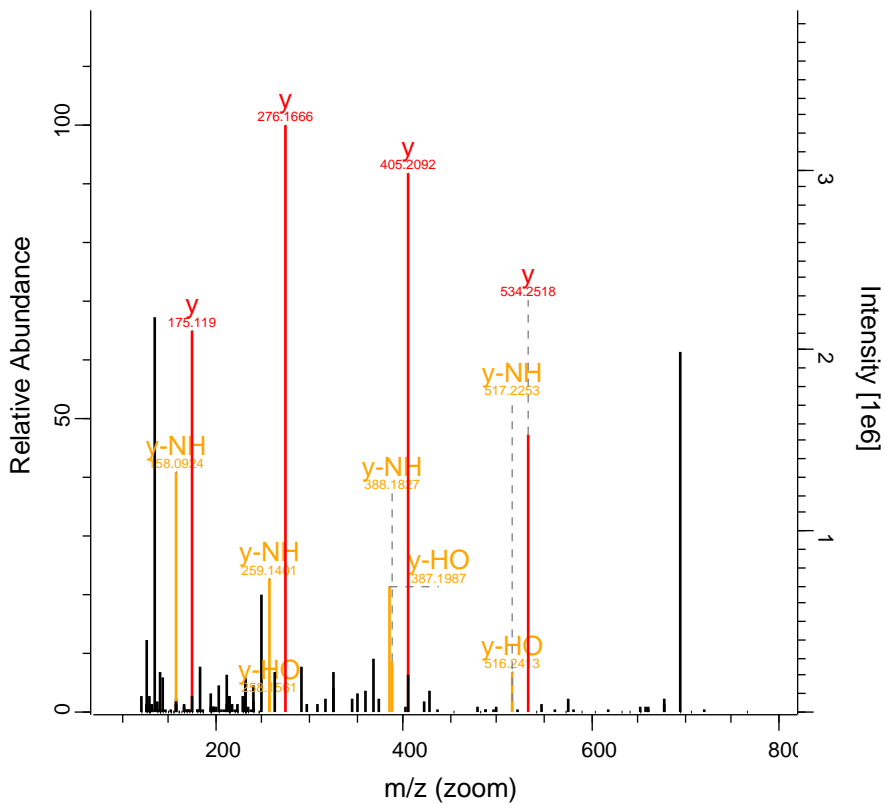

ph y y y y  
 de

- L R T Q E T R -

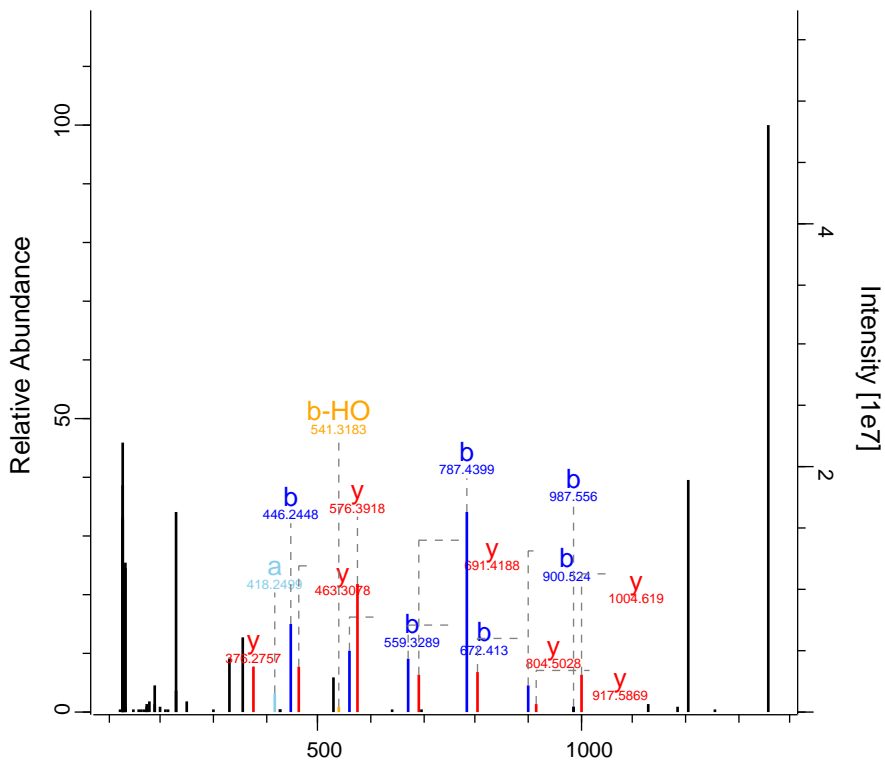

m/z (zoom)

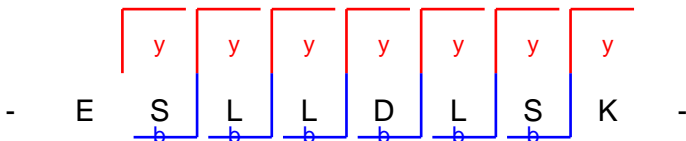



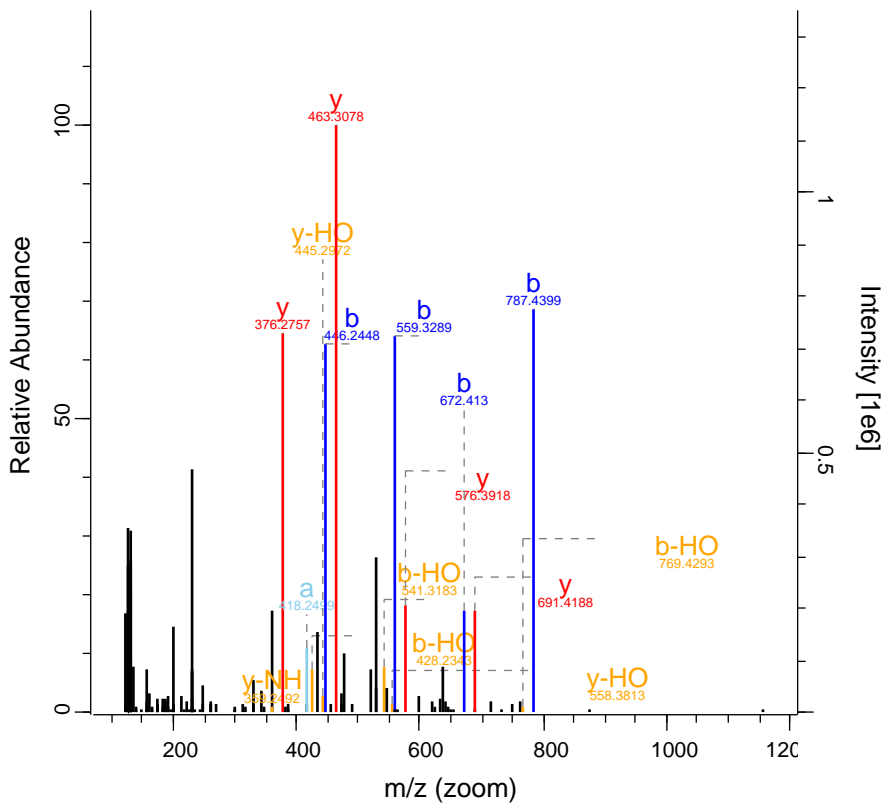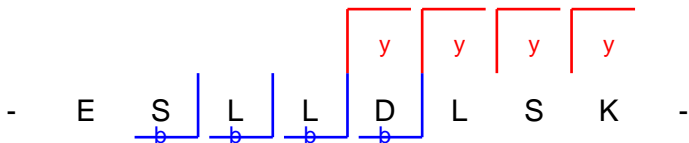

RO-QC-160121\_ZackD\_SS\_Set\_01\_Fraction 26892 FTMS; HC 86.09 405.21 SCTR

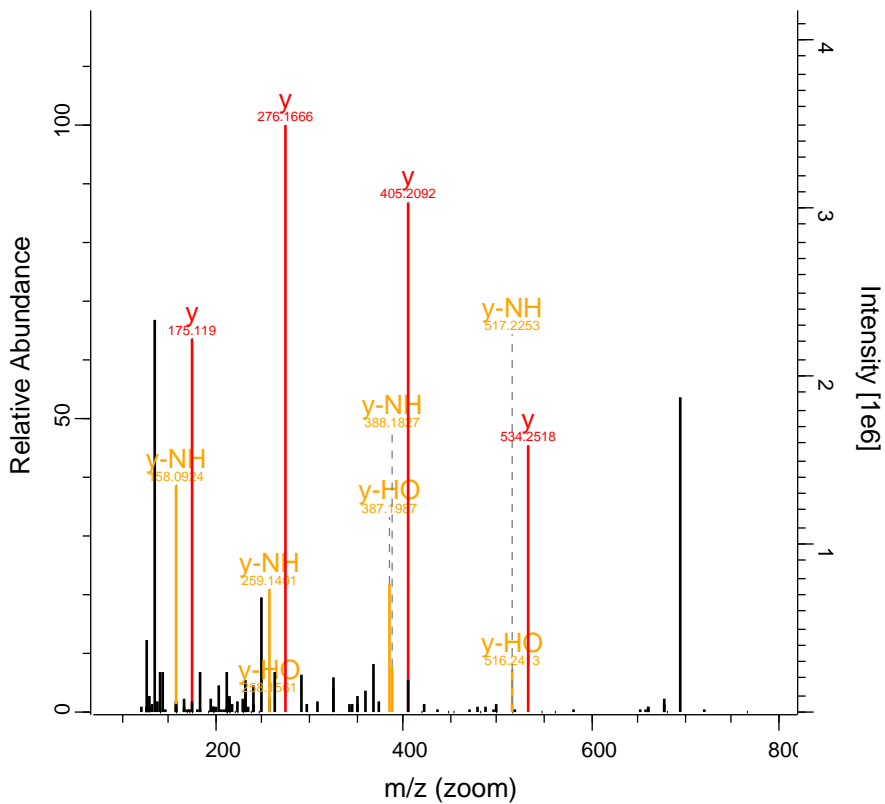

ph

y  
de

y

y

y

- L R T Q E T R -

RO-QC-160121\_ZackD\_SS\_Set\_01\_Fraction 27133 FTMS; HC 86.09 405.21 SCTR

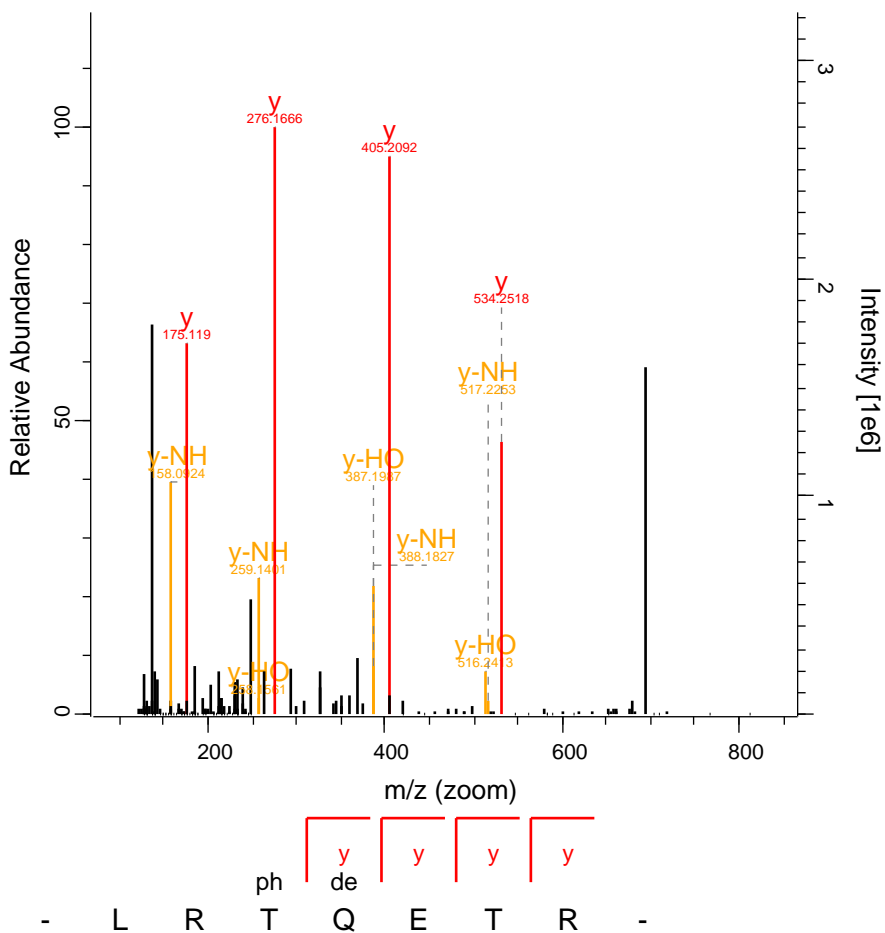

RO-QC-160121\_ZackD\_SS\_Set\_01\_Fraction 28736 FTMS; HC 63.28 968.53 OPALIN

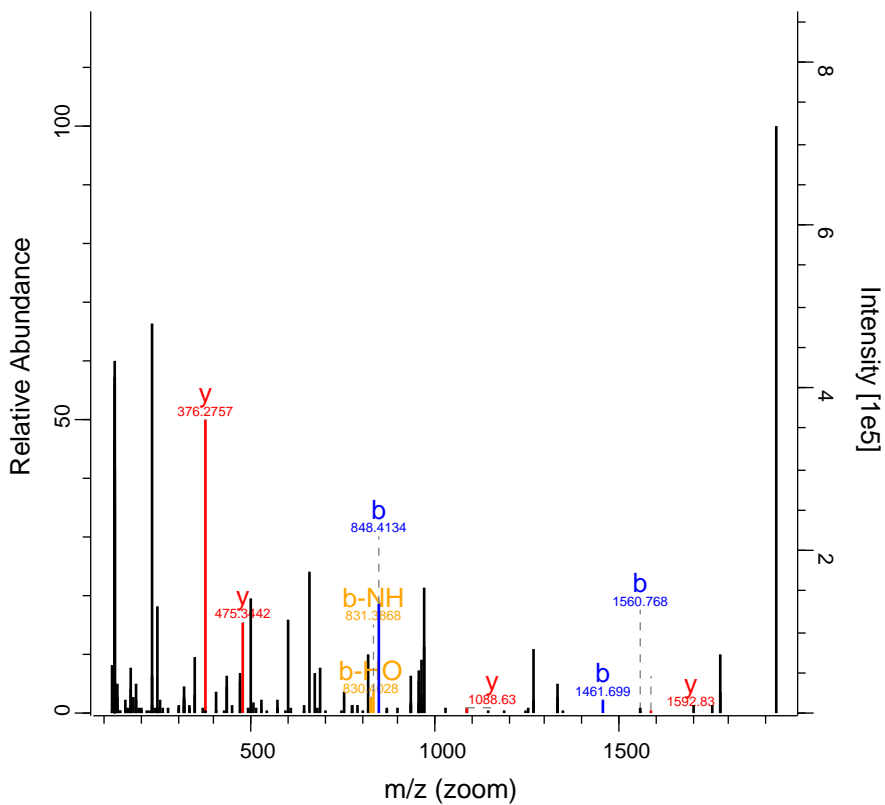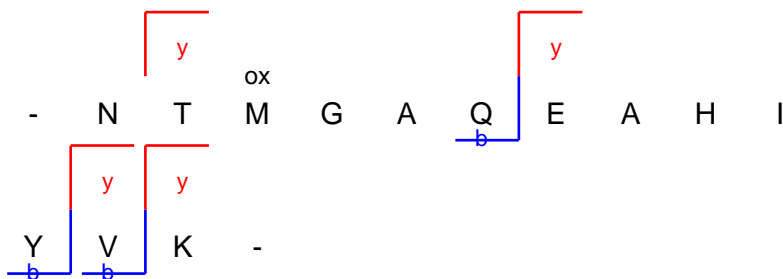

RO-QC-160121\_ZackD\_SS\_Set\_01\_Fraction 28876 FTMS; HCl 55.17 613.1 MELK

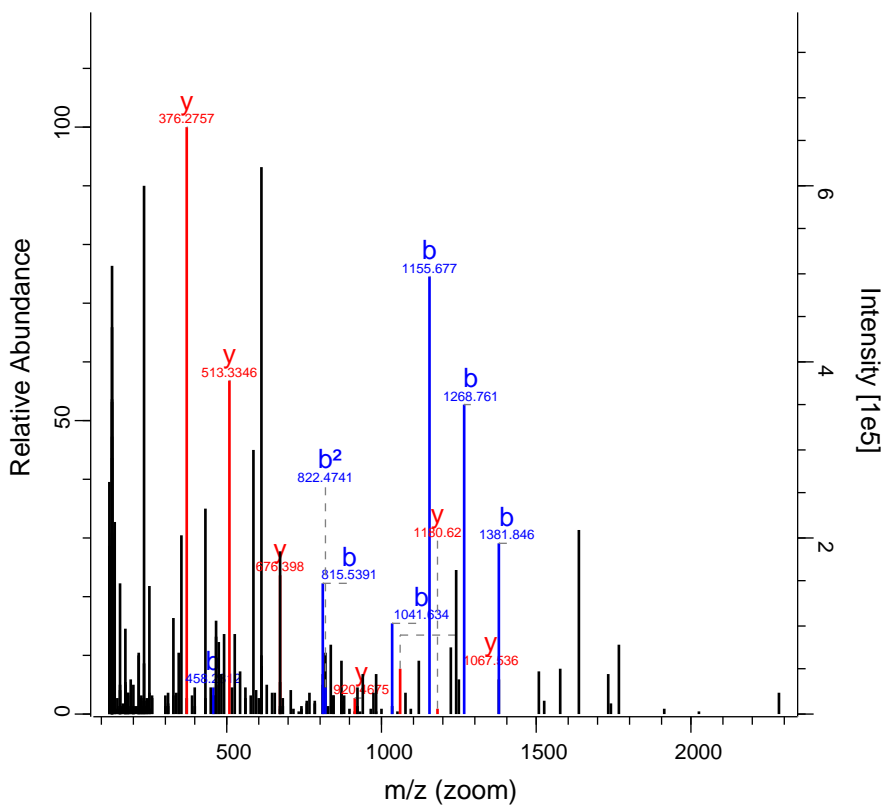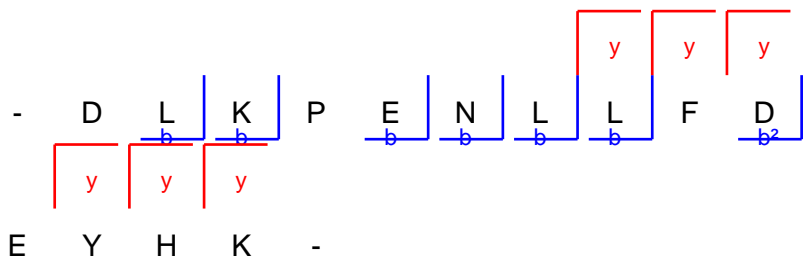

RO-QC-160121\_ZackD\_SS\_Set\_01\_Fraction 29436 FTMS; HC 41.64 732.38 SLC22A7

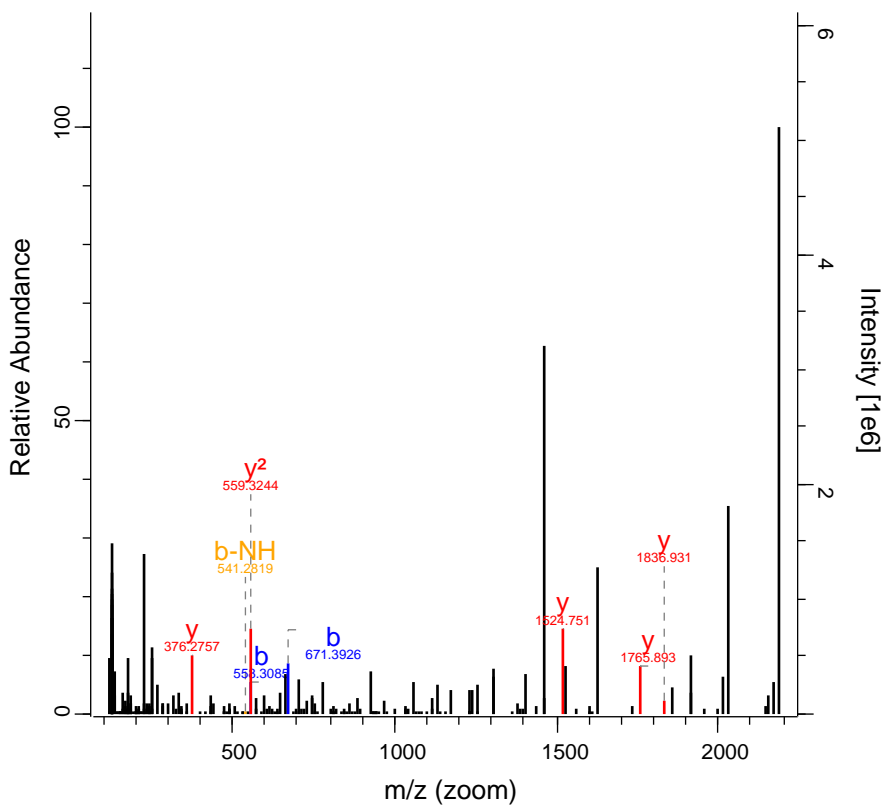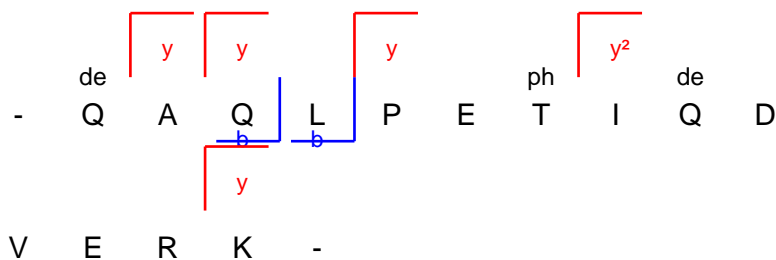

RO-QC-160121\_ZackD\_SS\_Set\_01\_Fraction 30066 FTMS; HC 82.42 585.66 GSKIP

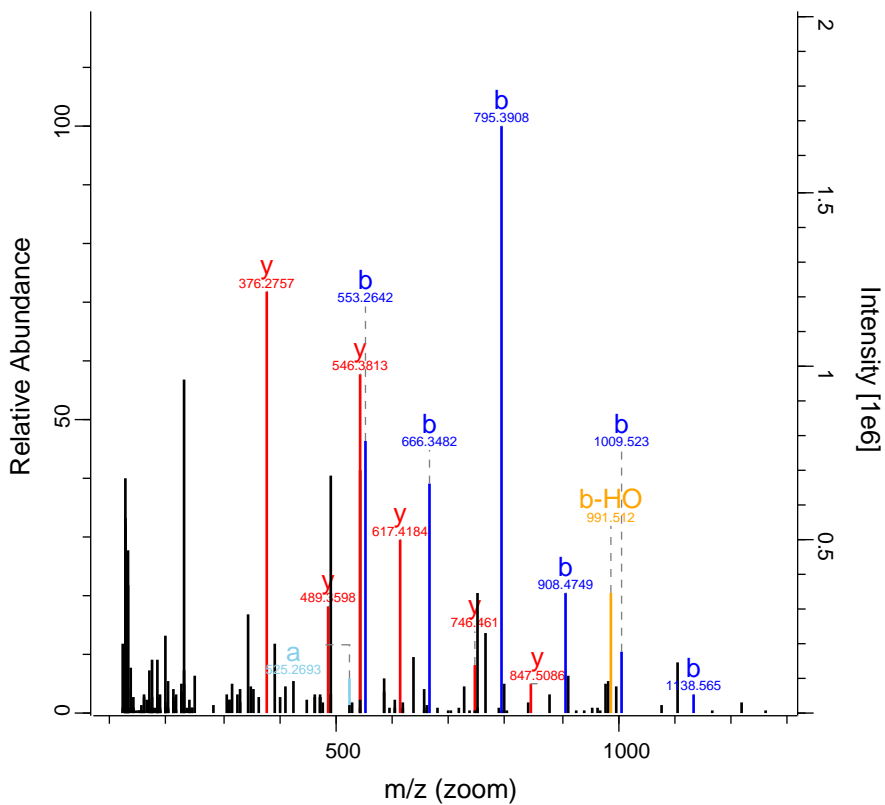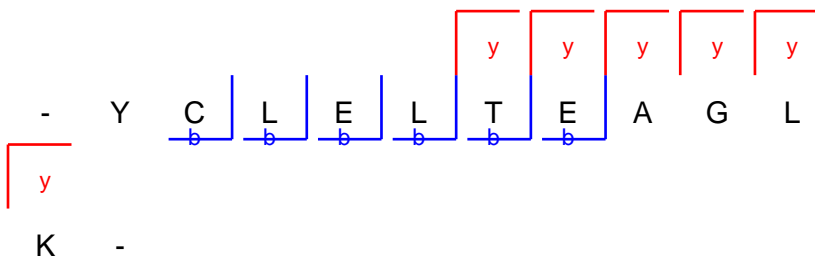

RO-QC-160121\_ZackD\_SS\_Set\_01\_Fractio 30114 FTMS; HC 123.35 682.88 MT-CYB

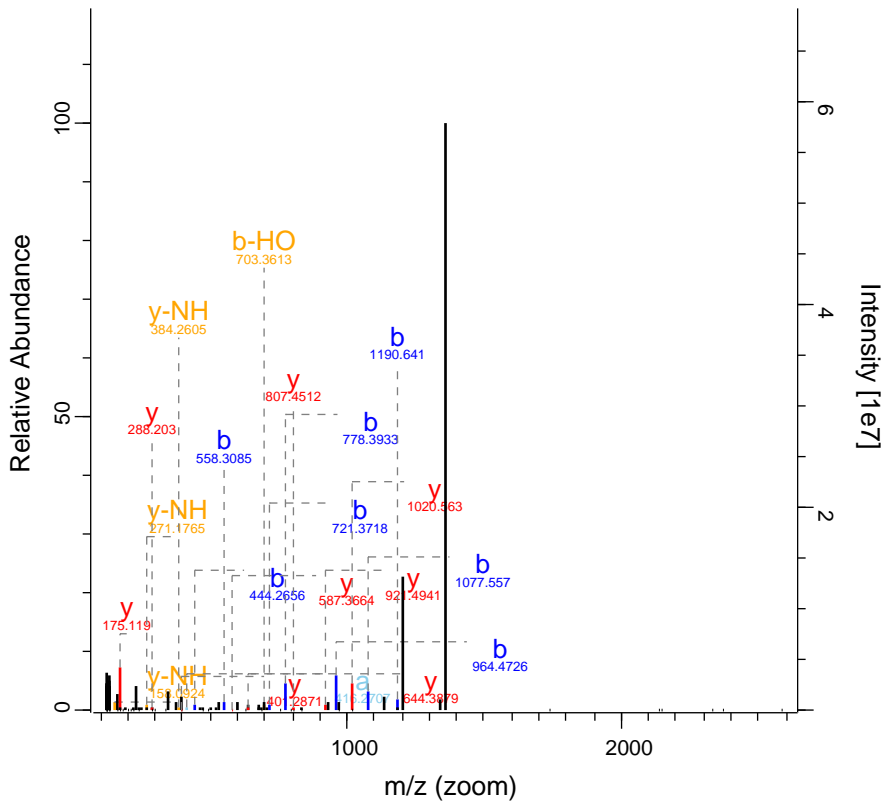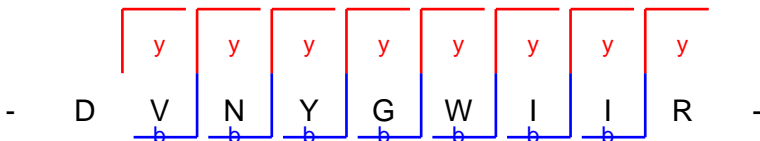





RO-QC-160121\_ZackD\_SS\_Set\_01\_Fraction 30509 FTMS; HC 136.7 841.75 CNIH4

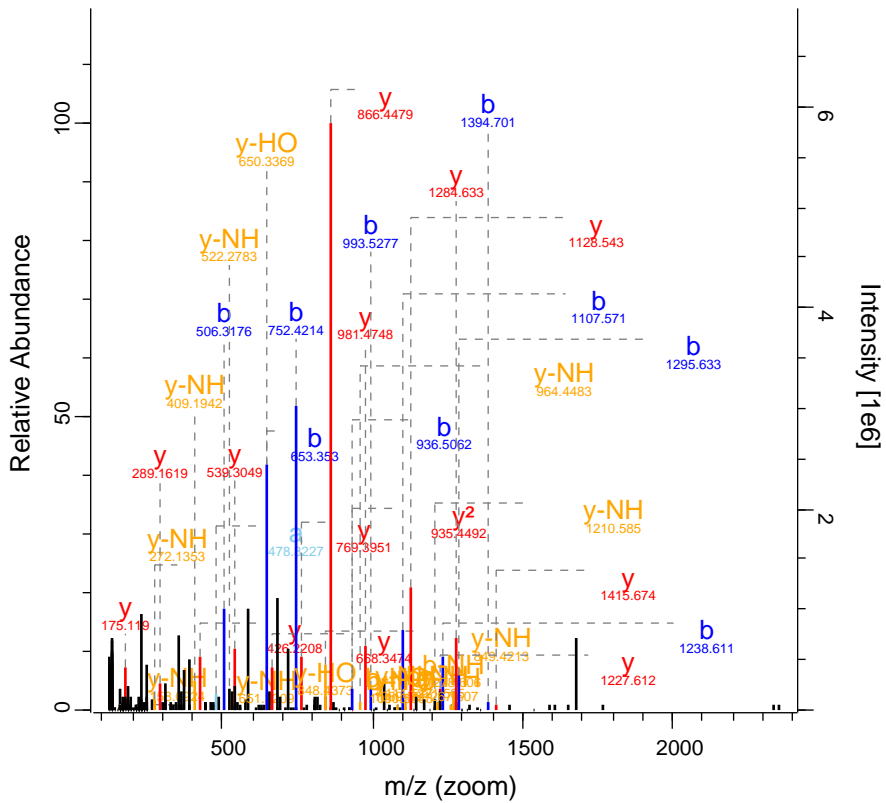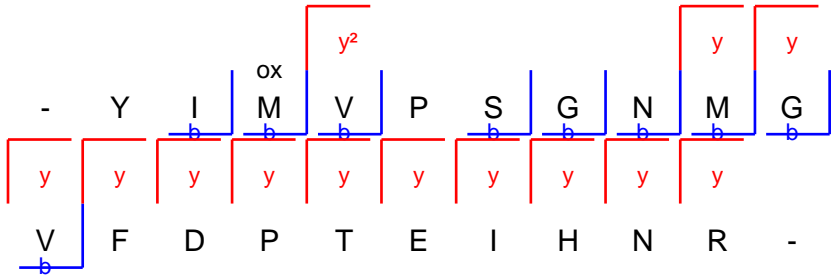

RO-QC-160121\_ZackD\_SS\_Set\_01\_Fraction 30611 FTMS; HC 48.82 631.57 CNIH4

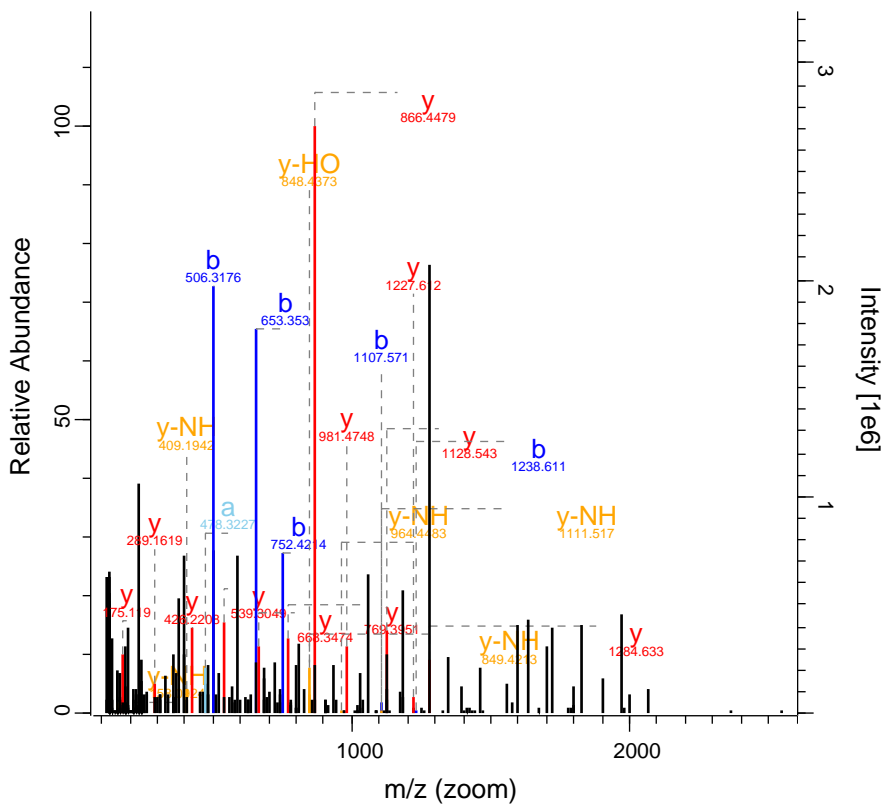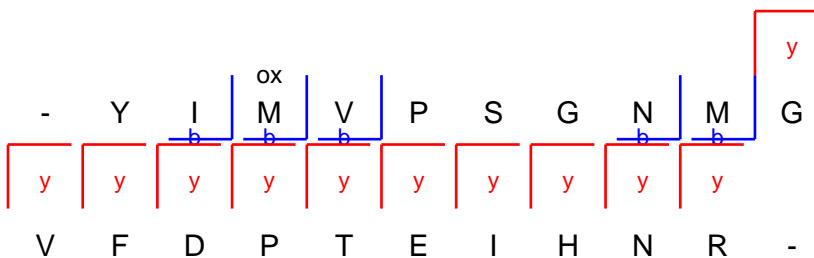

RO-QC-160121\_ZackD\_SS\_Set\_01\_Fraccio 30714 FTMS; HC 142.26 841.42 CNIH4

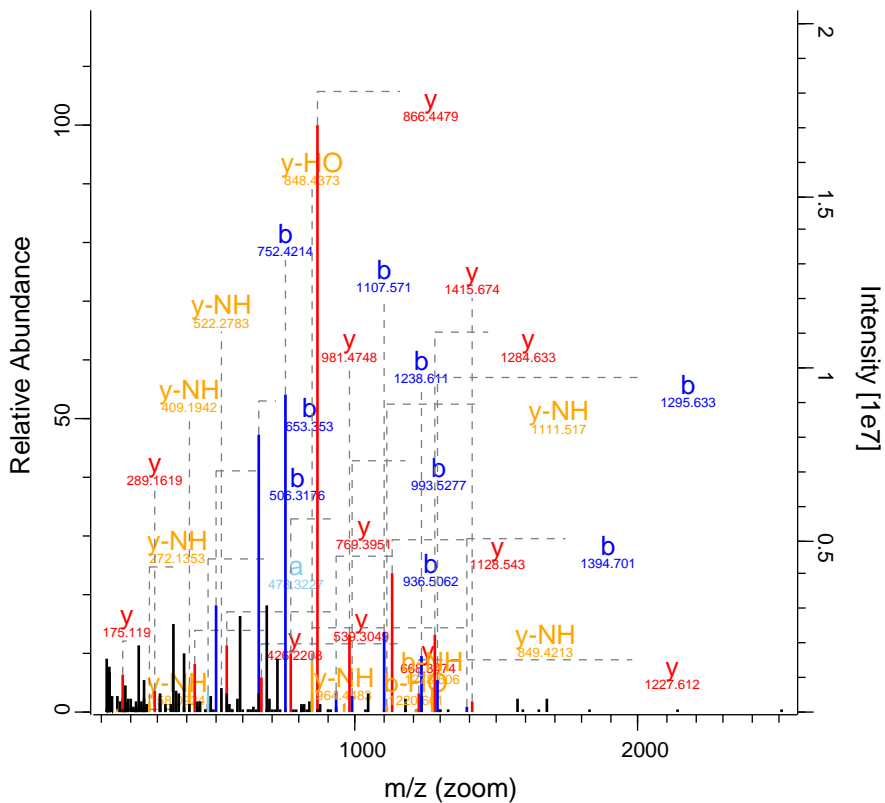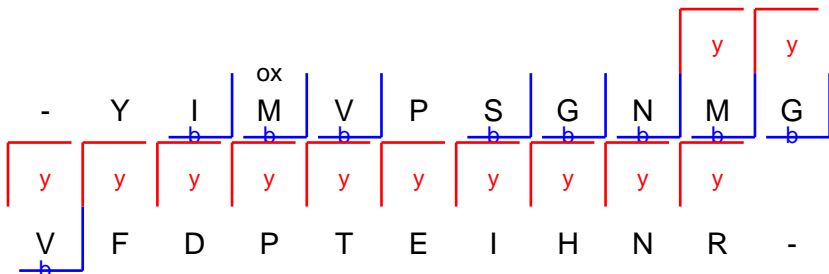

RO-QC-160121\_ZackD\_SS\_Set\_01\_Fraction 30839 FTMS; HC 130.2 655.38 ALKBH8

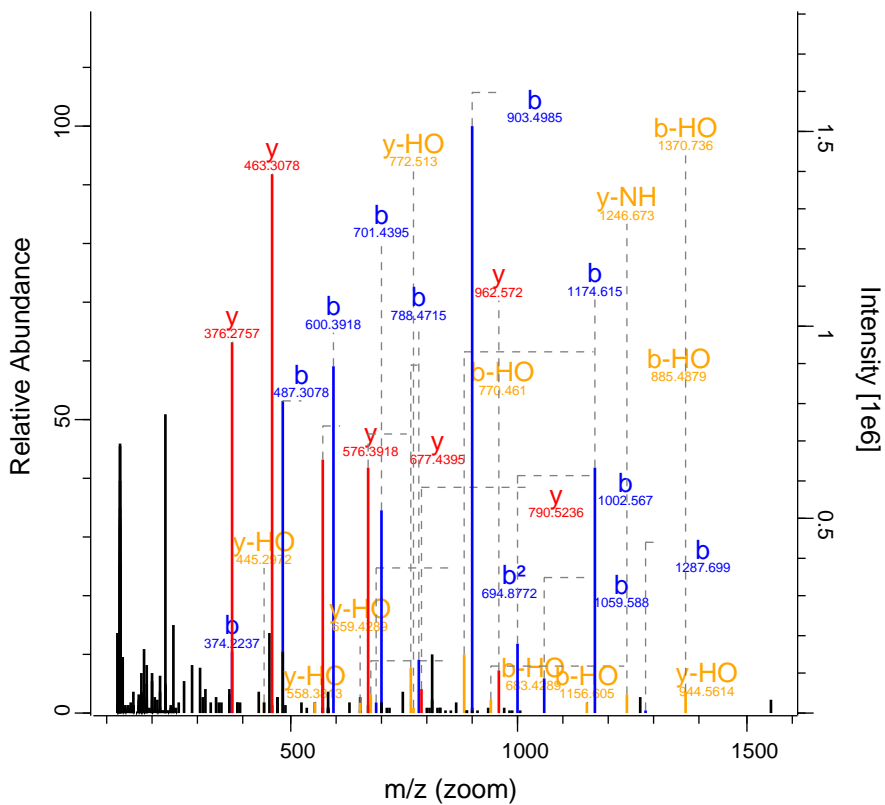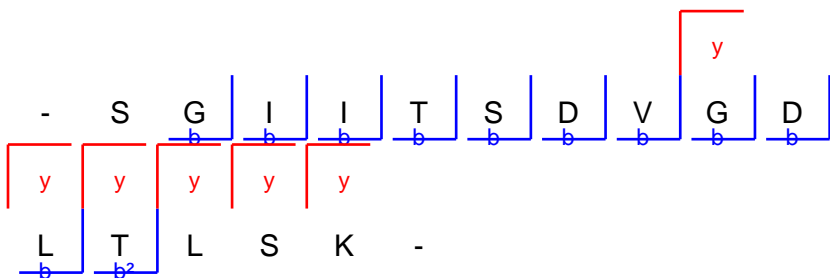

RO-QC-160121\_ZackD\_SS\_Set\_01\_Fraccio 30867 FTMS; HC 125.18 839.48 GTF3C6

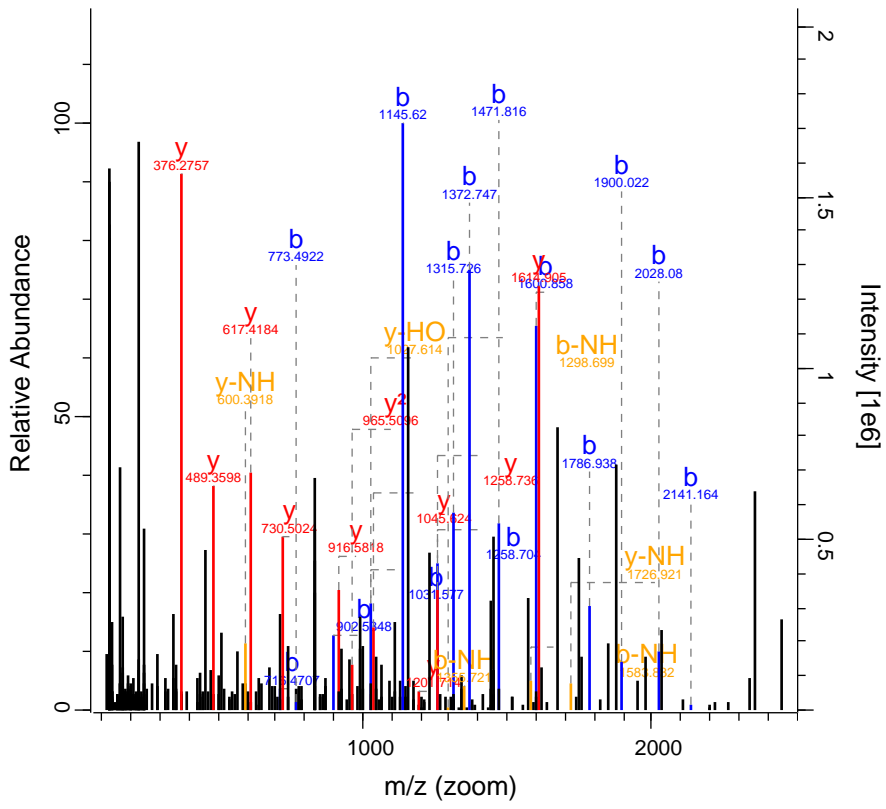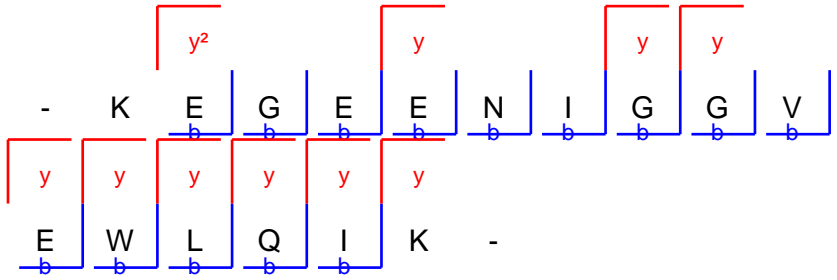

RO-QC-160121\_ZackD\_SS\_Set\_01\_Fraction 30900 FTMS; HC 89.26 631.34 POP7

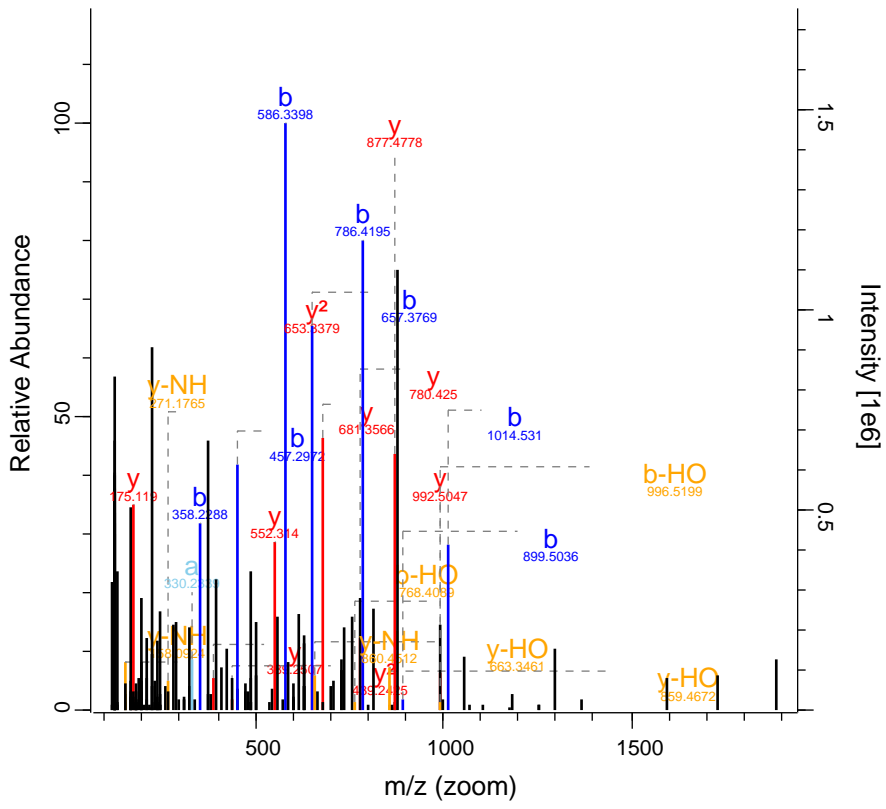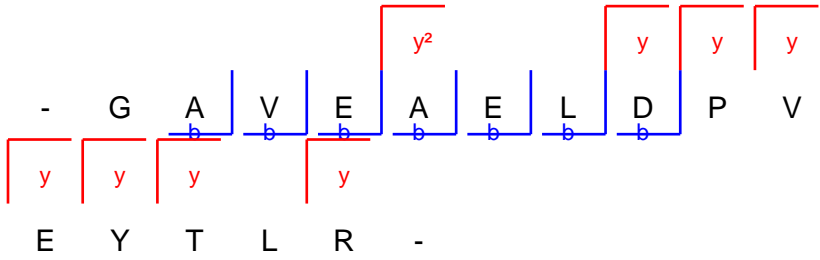

E Y T L R -

- G A V E A E L D P V

RO-QC-160121\_ZackD\_SS\_Set\_01\_Fractio 30901 FTMS; HC 208.95 946.01 POP7

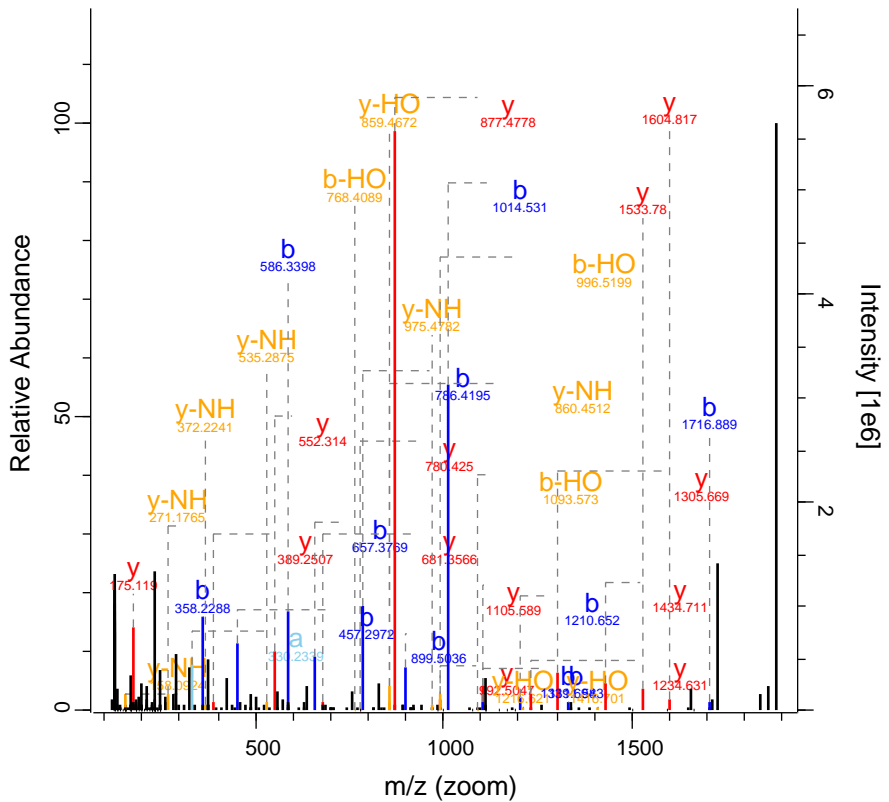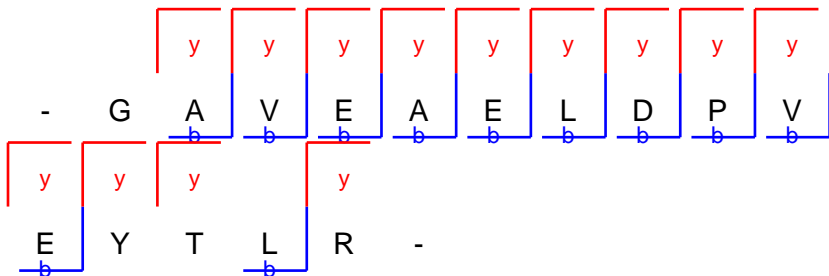



RO-QC-160121\_ZackD\_SS\_Set\_01\_Fraction 31027 FTMS; HC 72.43 829.03 C4orf33

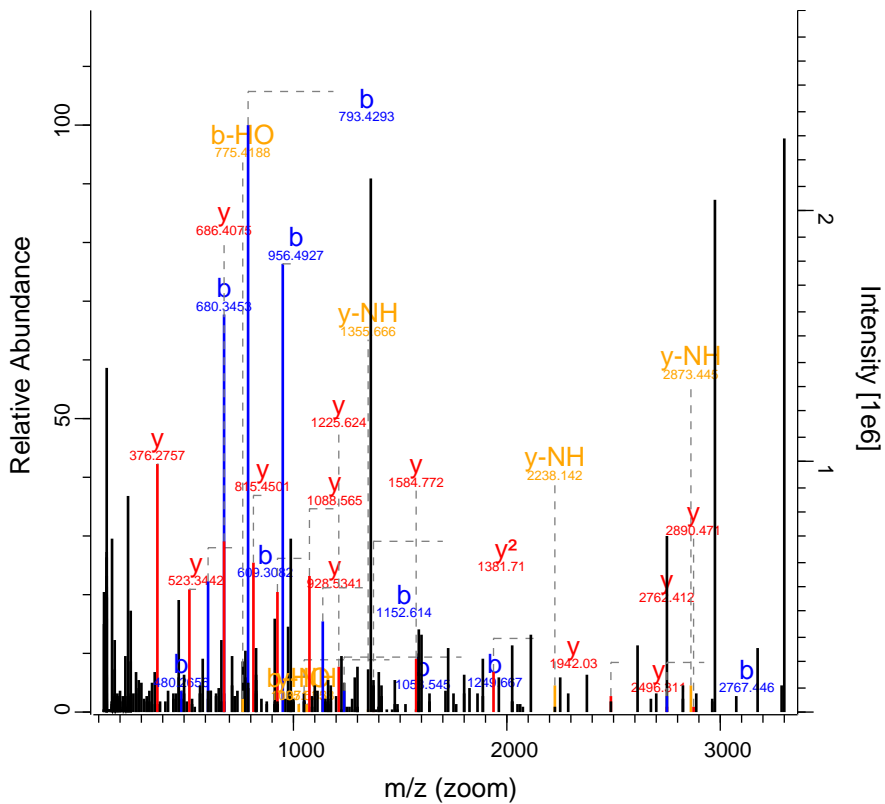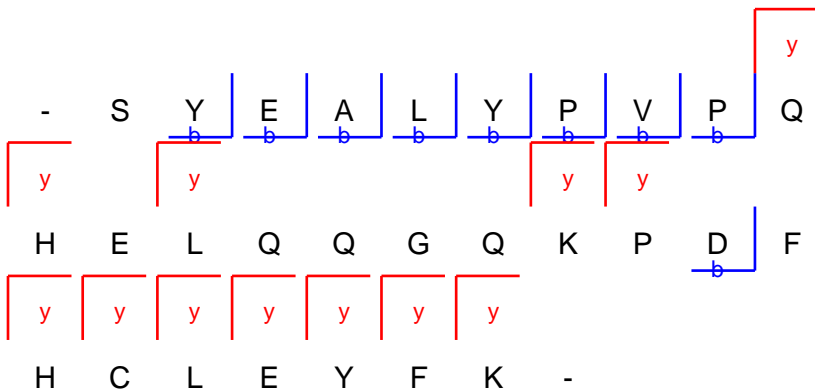

RO-QC-160121\_ZackD\_SS\_Set\_01\_Fraction 31460 FTMS; HCl 72.21 872.5 KBTBD2

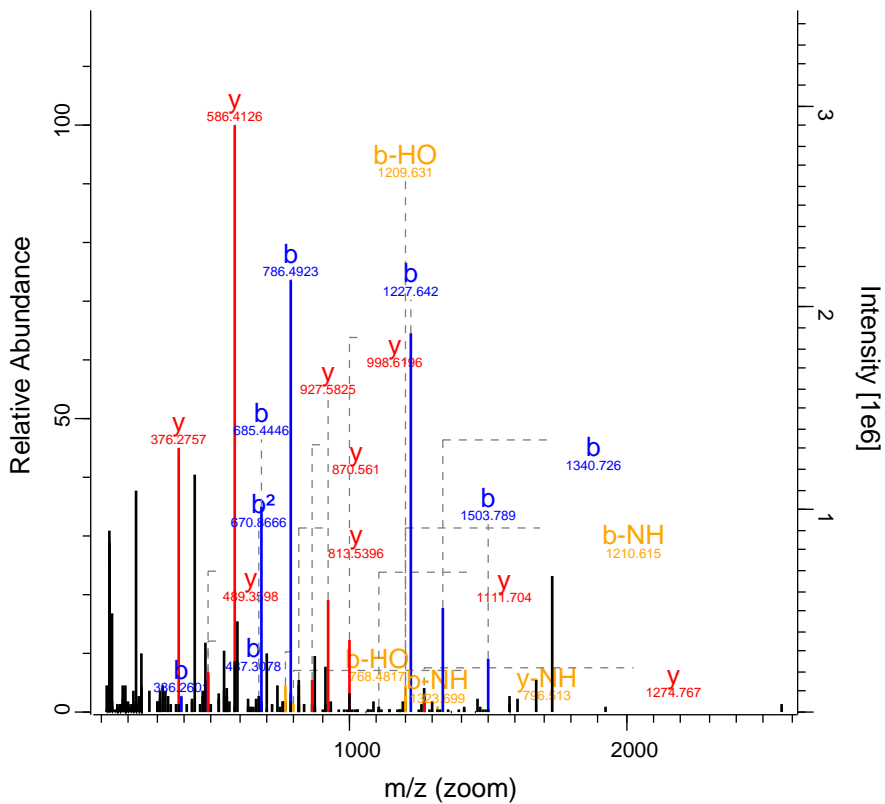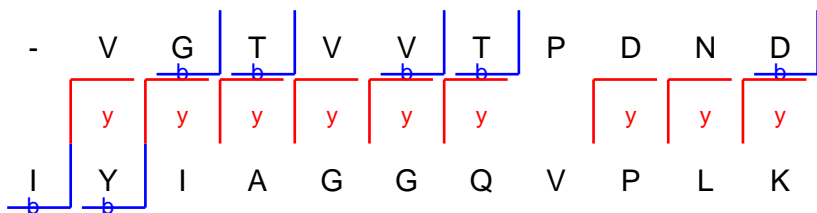

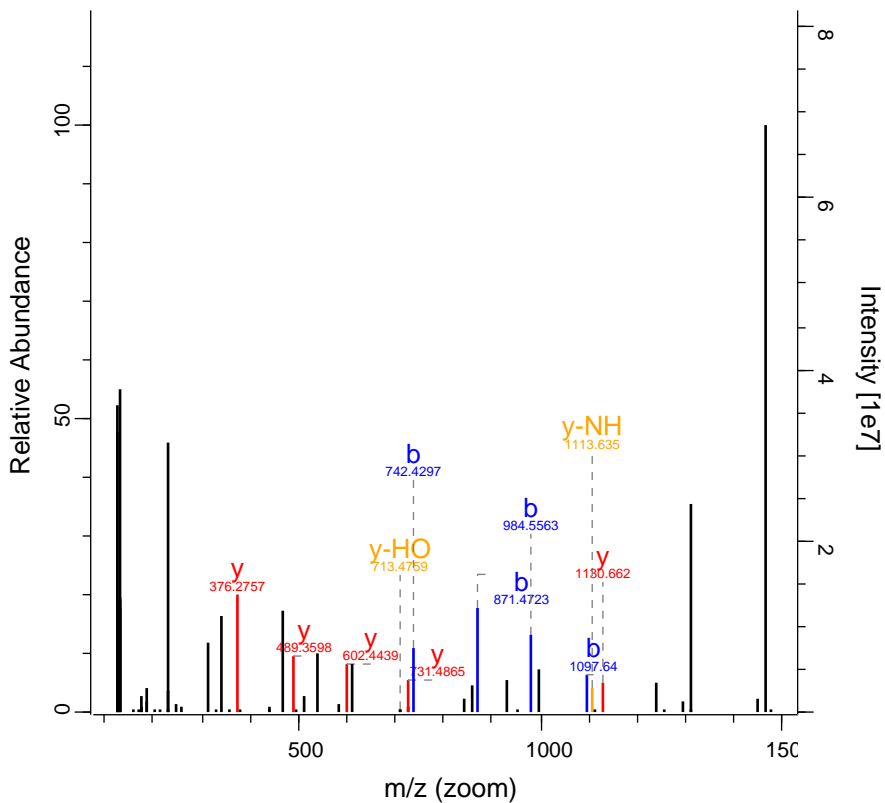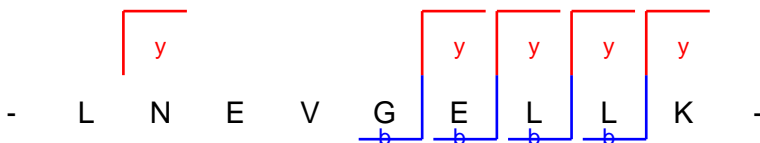

RO-QC-160121\_ZackD\_SS\_Set\_01\_Fraction 32157 FTMS; HC 70.44 857.46 UBE2S

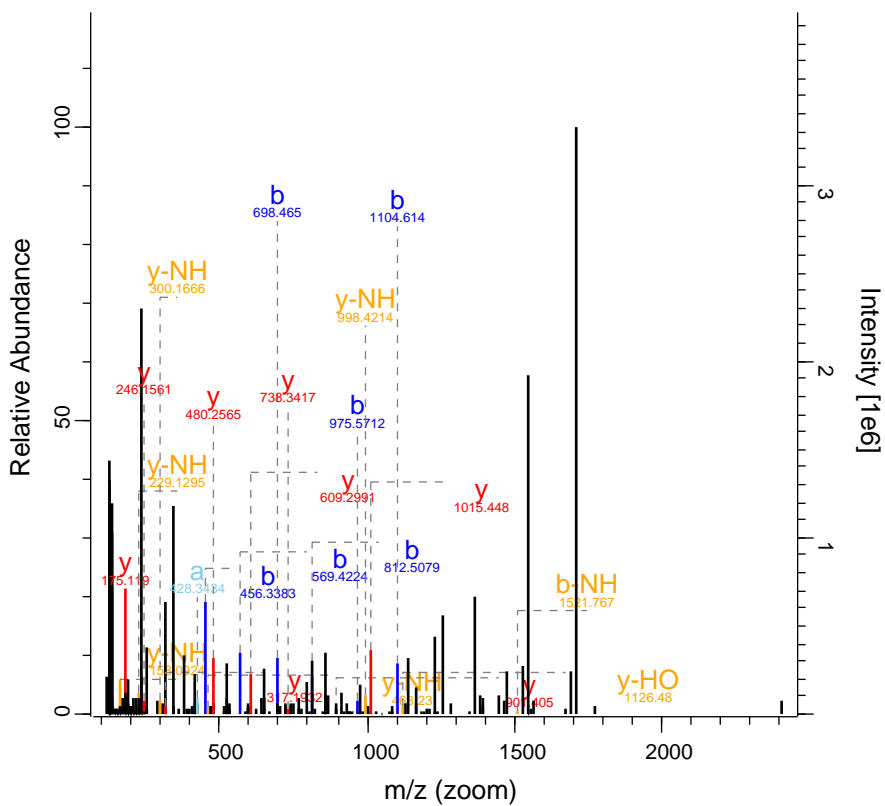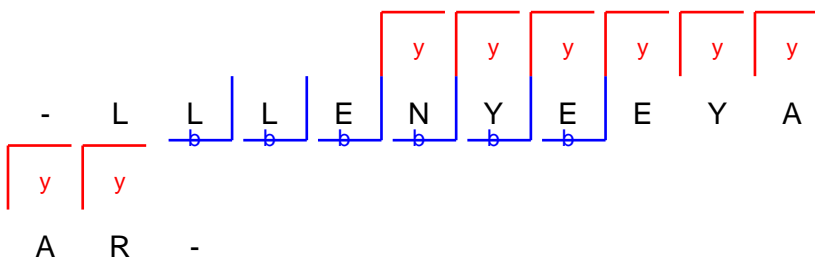

RO-QC-160121\_ZackD\_SS\_Set\_01\_Fraction 32676 FTMS; HCl 102.89 729.1 BOLA1

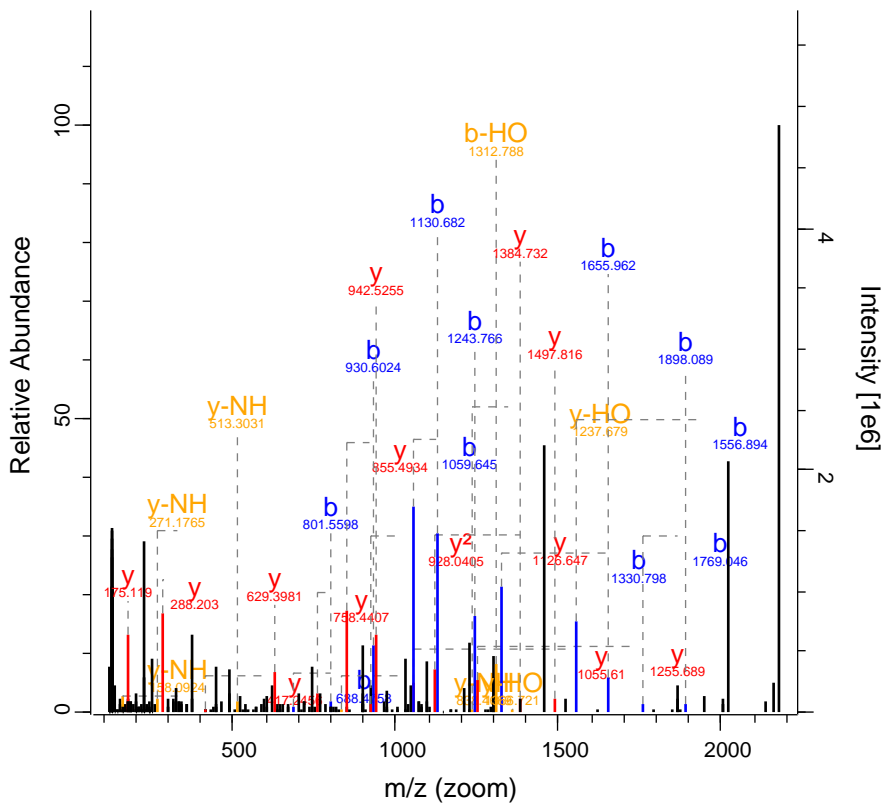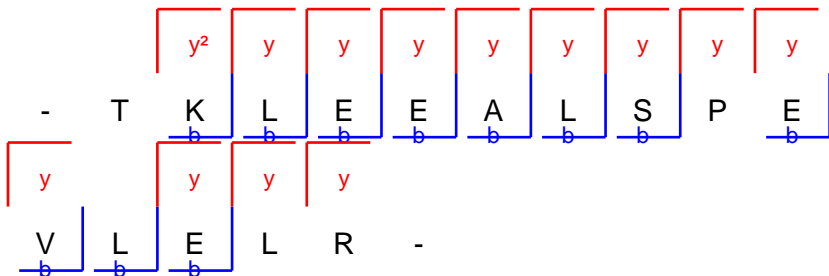

| Raw File                                | Scan  | Method    | Score | m/z    |
|-----------------------------------------|-------|-----------|-------|--------|
| RO-QC-160121_ZackD_SS_Set_01_Fraction_6 | 32685 | FTMS; HCD | 67.99 | 800.96 |

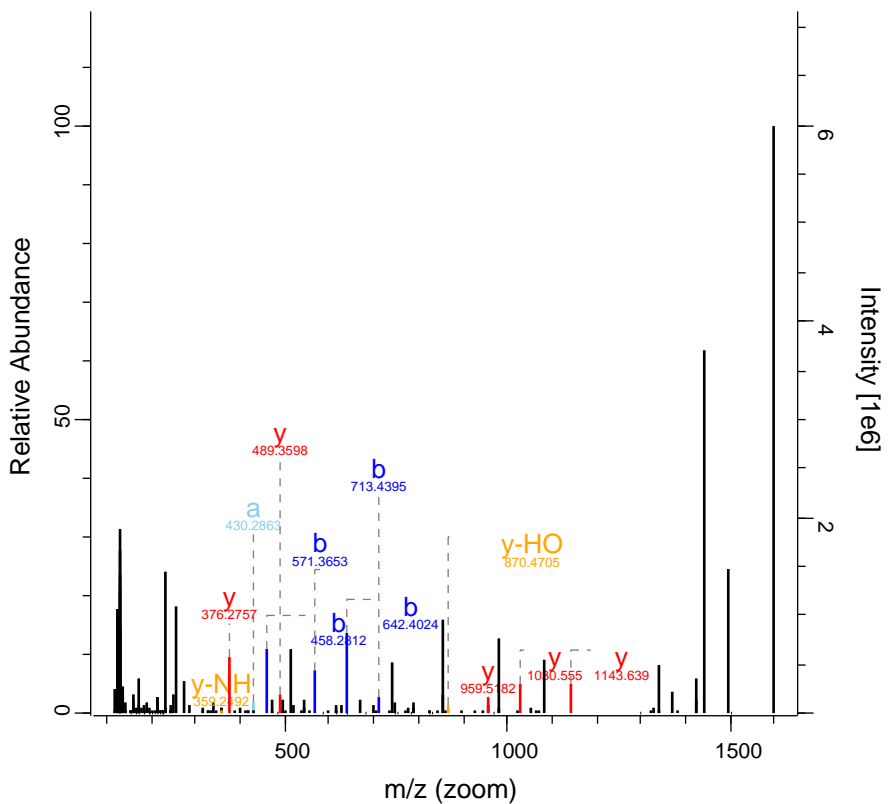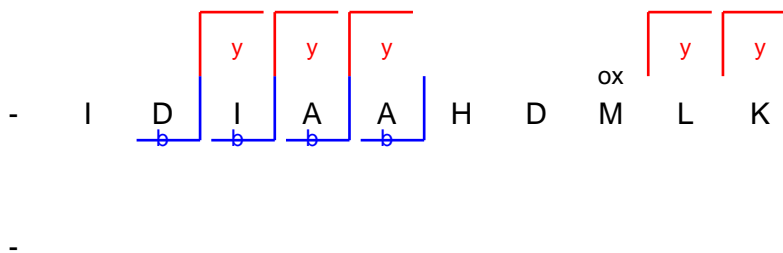

RO-QC-160121\_ZackD\_SS\_Set\_01\_Fraction 33207 FTMS; HC 45.1 911.98 C12orf29

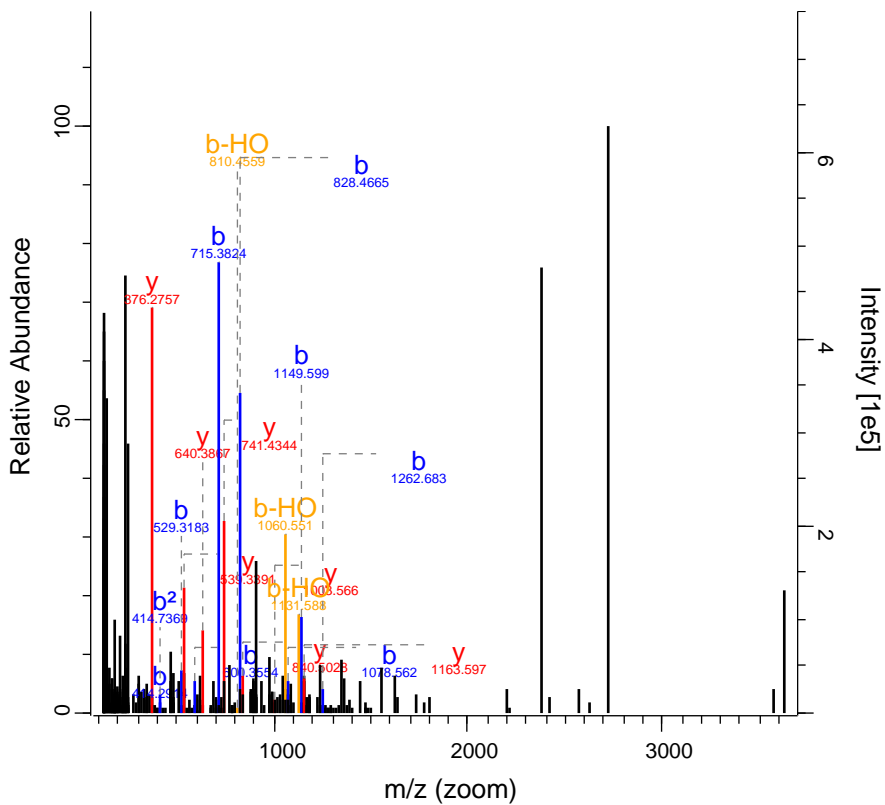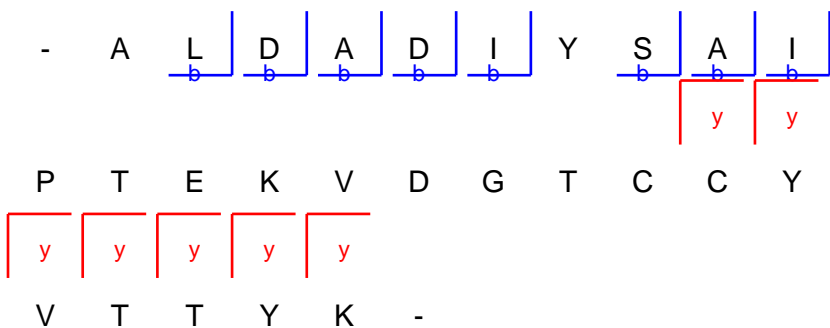

RO-QC-160121\_ZackD\_SS\_Set\_01\_Fraction 33396 FTMS; HC 95.2 739.42 MZT1

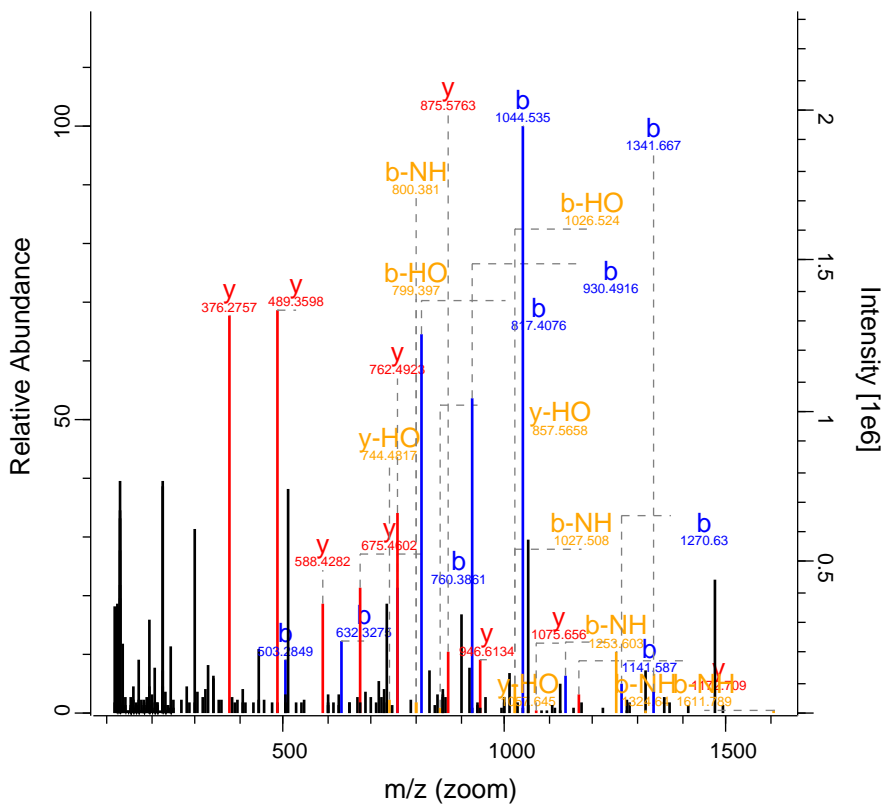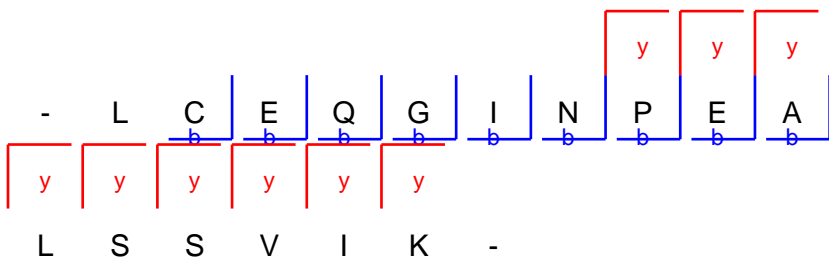





RO-QC-160121\_ZackD\_SS\_Set\_01\_Fraction 35975 FTMS; HC 45.1 1030.8 DENND6A

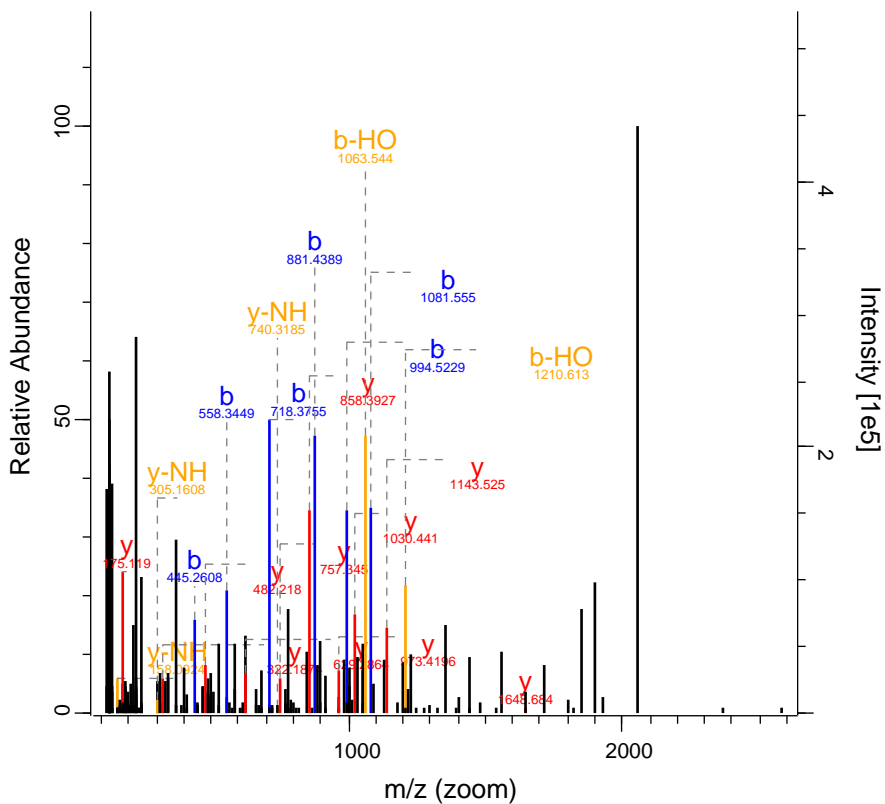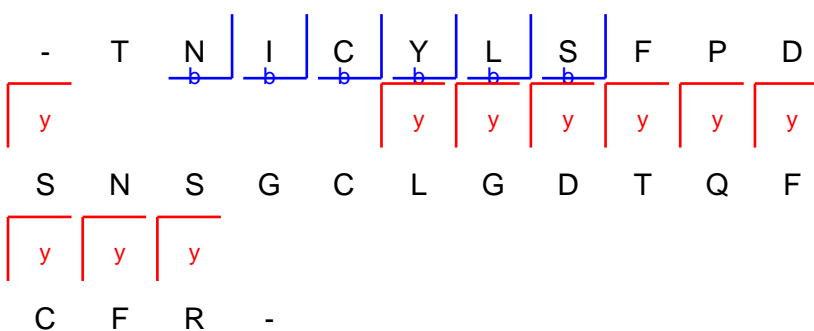

RO-QC-160121\_ZackD\_SS\_Set\_01\_Fractic 37572 FTMS; HC 232 1066.02 MT-CO1

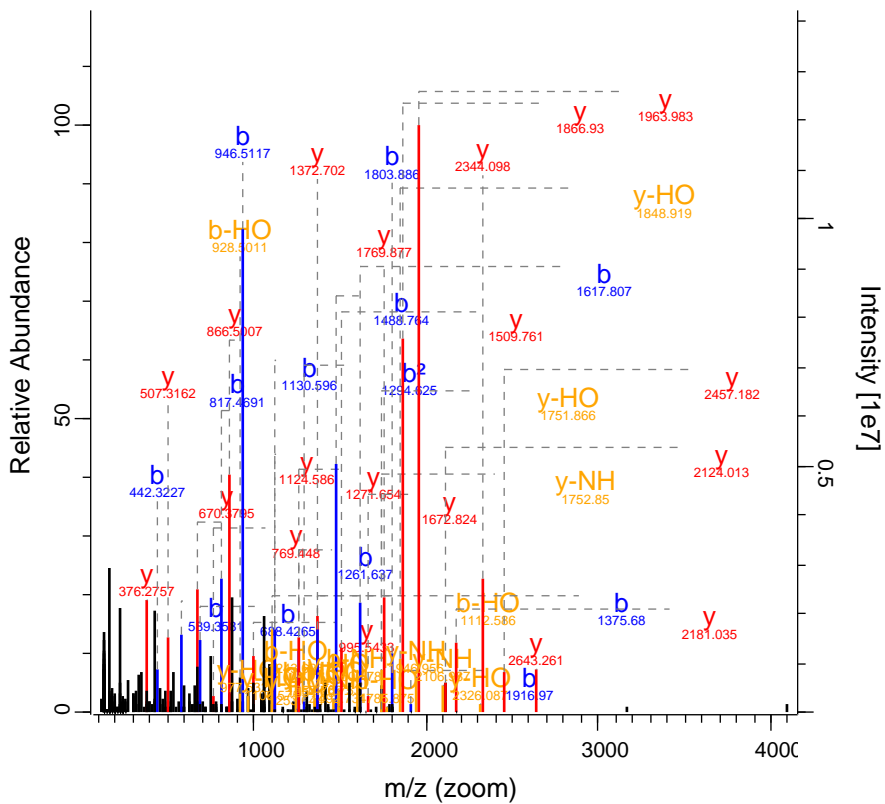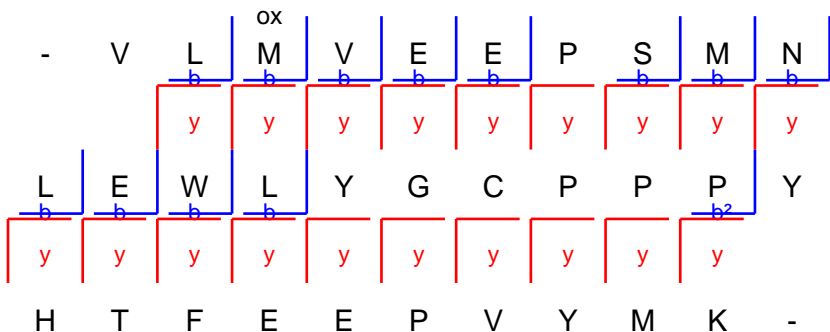

RO-QC-160121\_ZackD\_SS\_Set\_01\_Fraction 38027 FTMS; HC 91.85 860.44 PRSS58

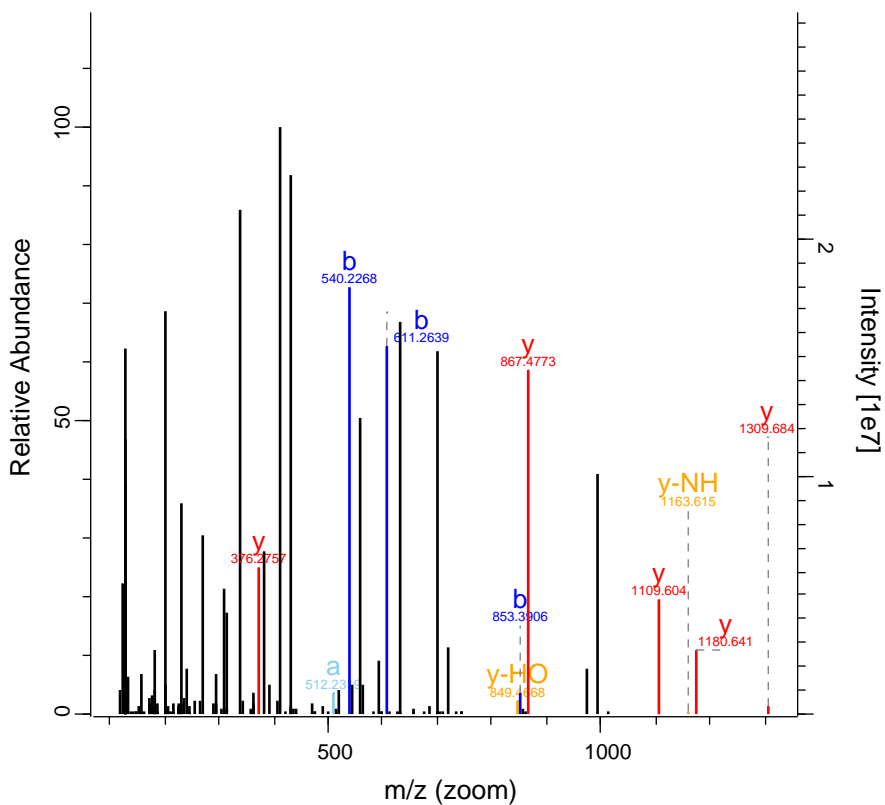

m/z (zoom)

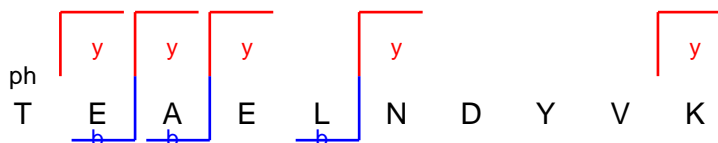

Raw File

Scan Method Score m/z

RO-QC-160121\_ZackD\_SS\_Set\_01\_Fraction\_6

38363 FTMS; HCD 64.8 682.35

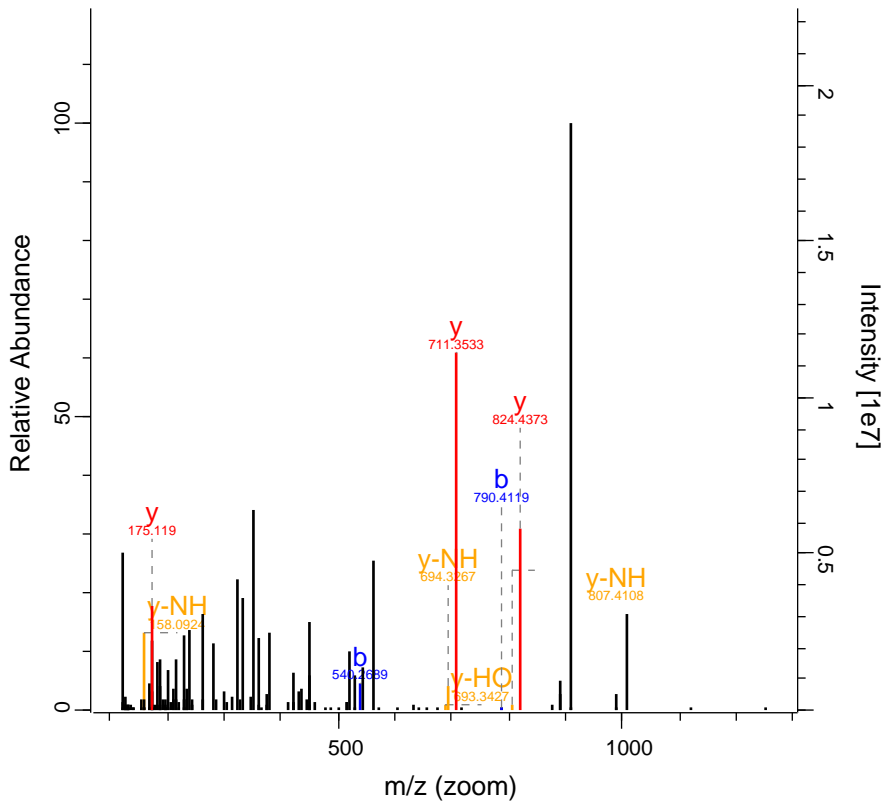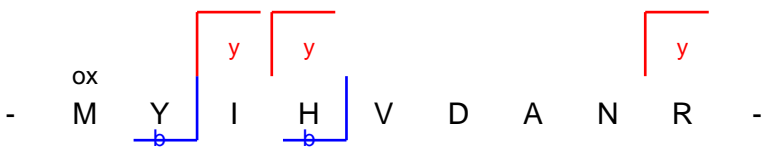



RO-QC-160121\_ZackD\_SS\_Set\_01\_Fractio 38798 FTMS; HC 105.86 930.03 GRK6;GRK5

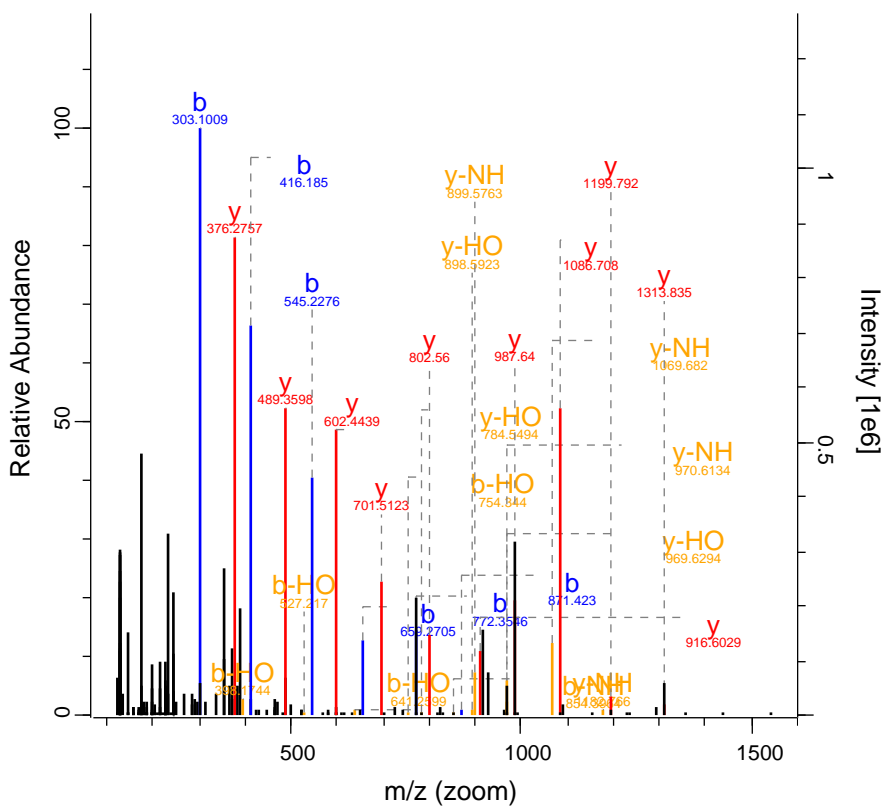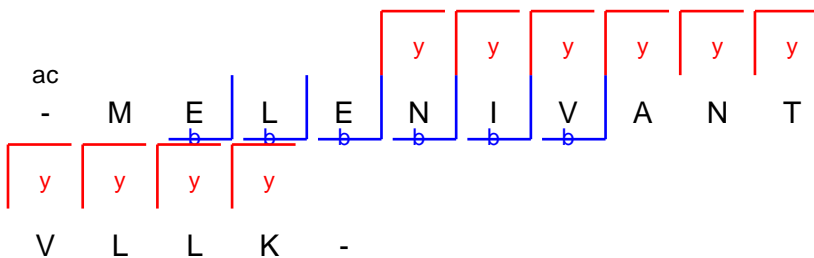

Raw File

Scan Method Score m/z

RO-QC-160121\_ZackD\_SS\_Set\_01\_Fraction\_7

5134 FTMS; HCD 85.29 815.4

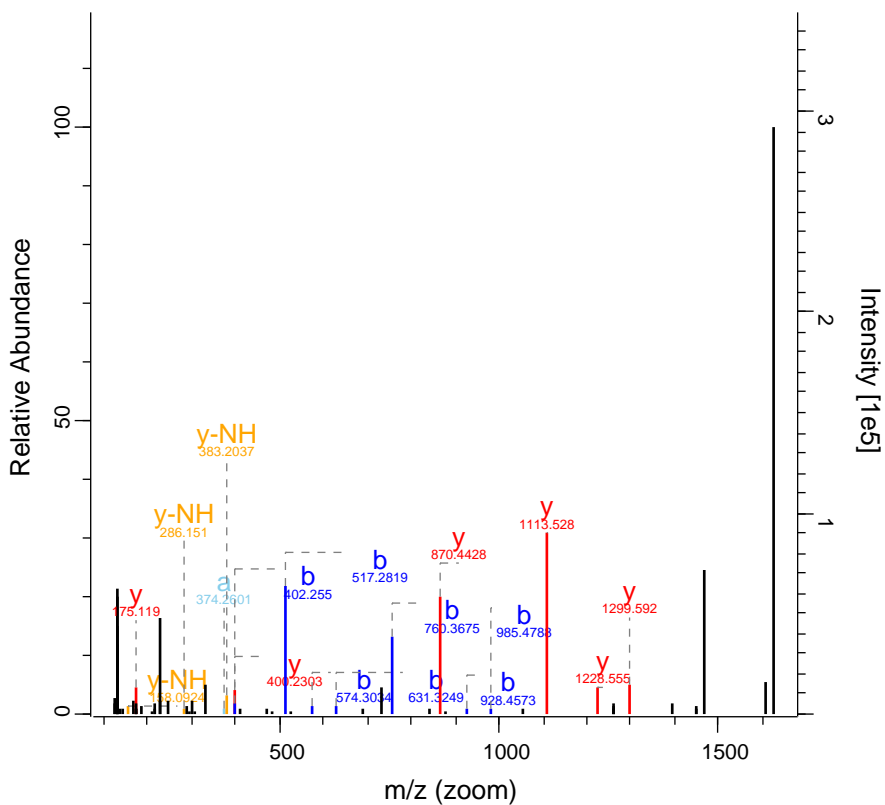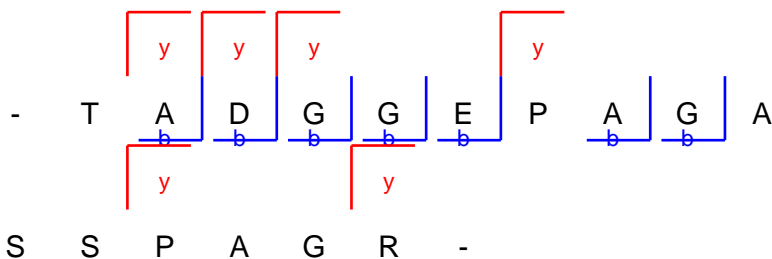





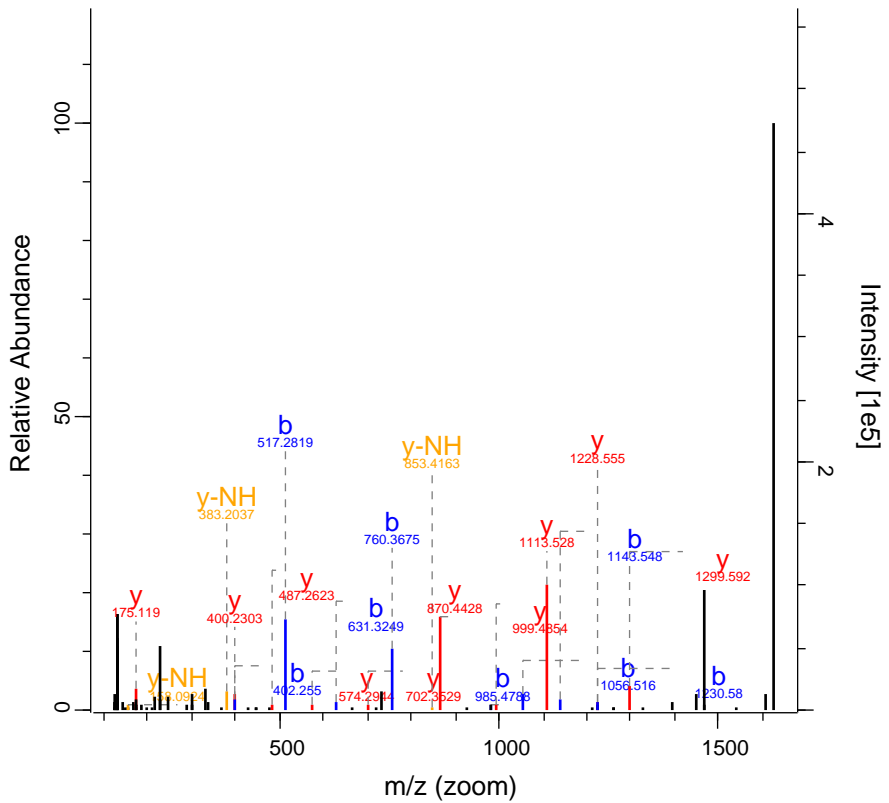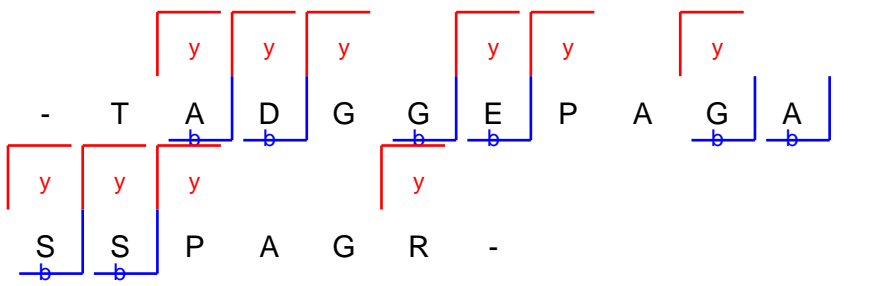

RO-QC-160121\_ZackD\_SS\_Set\_01\_Fraction 6188 FTMS; HCl 105.9 574.28 SECISBP2

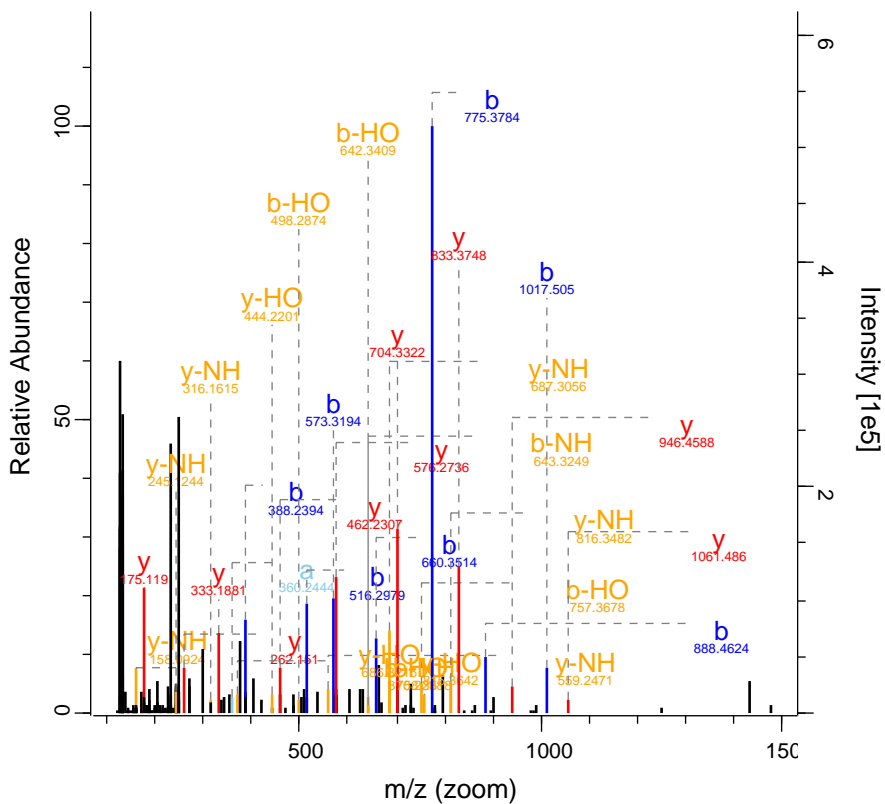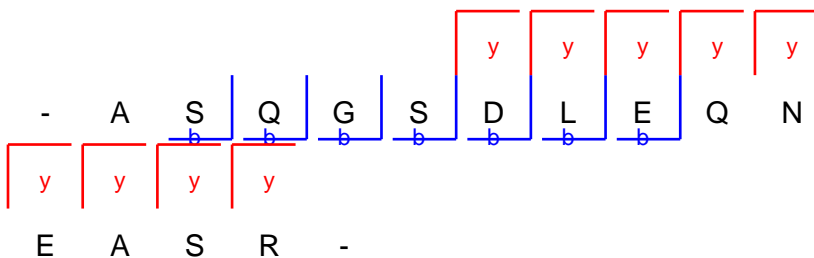

RO-QC-160121\_ZackD\_SS\_Set\_01\_Fraction 6200 FTMS; HCl 58.17 861.42 SECISBP2

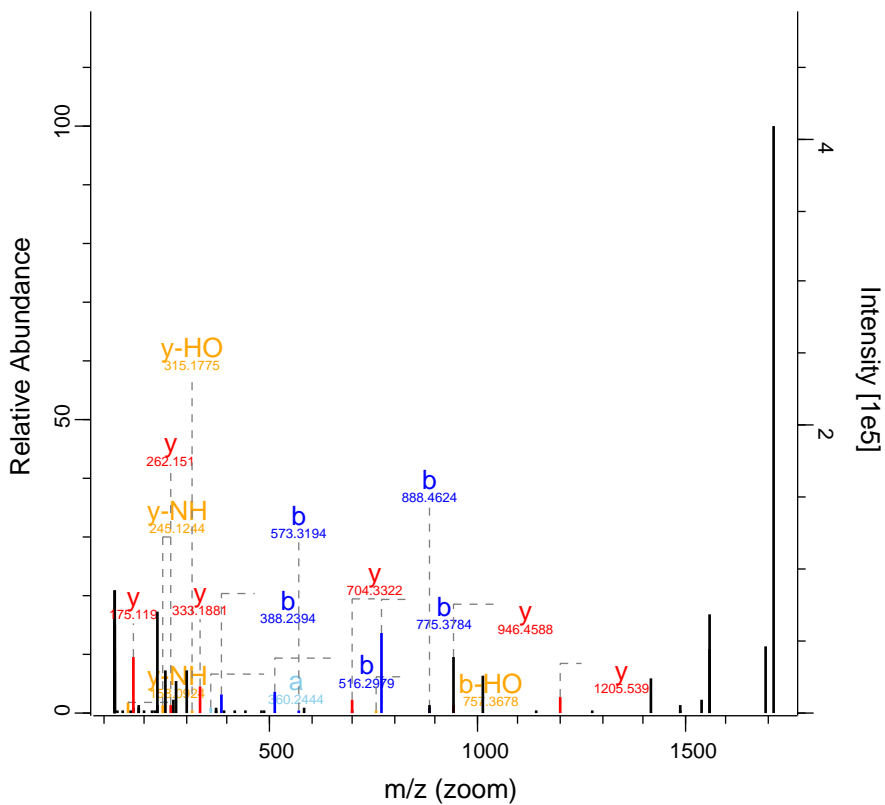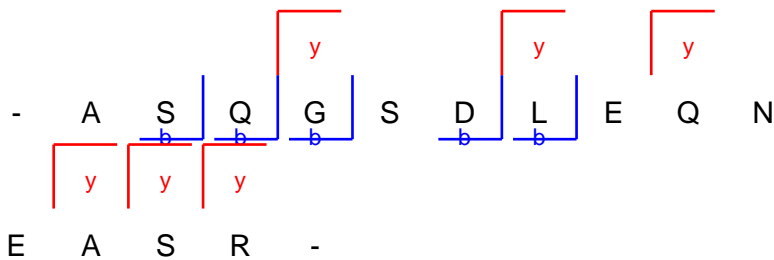

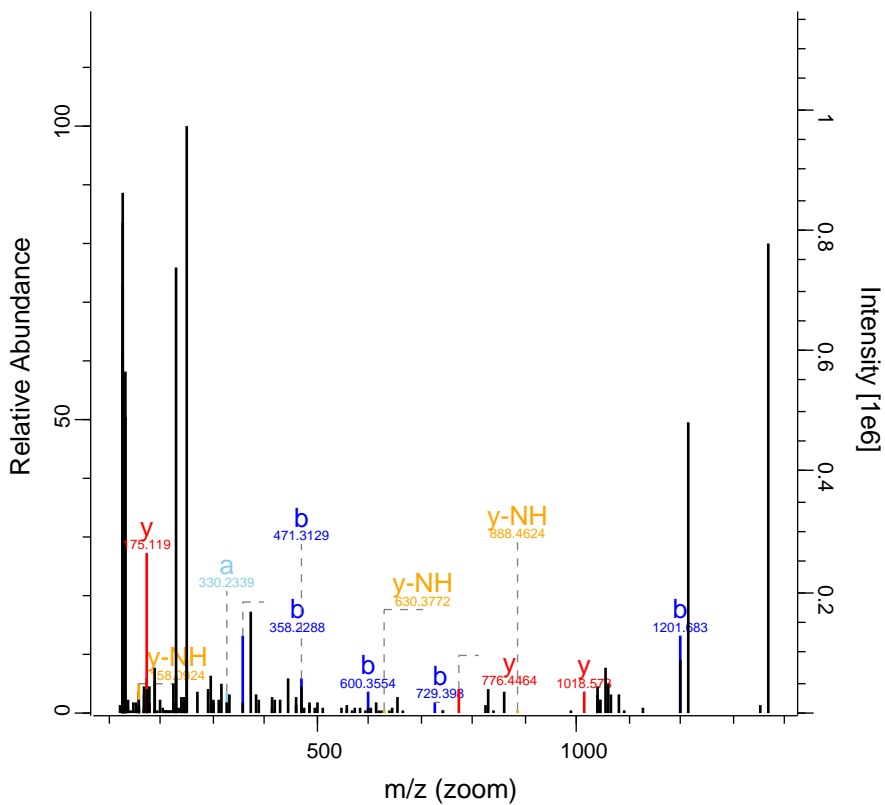

m/z (zoom)

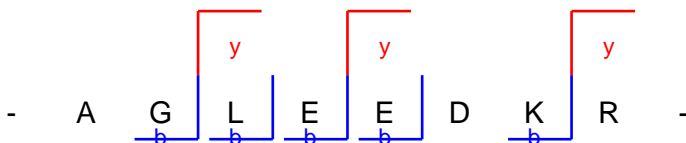

RO-QC-160121\_ZackD\_SS\_Set\_01\_Fraction 6648 FTMS; HCl 89.25 356.22 CNKSR2

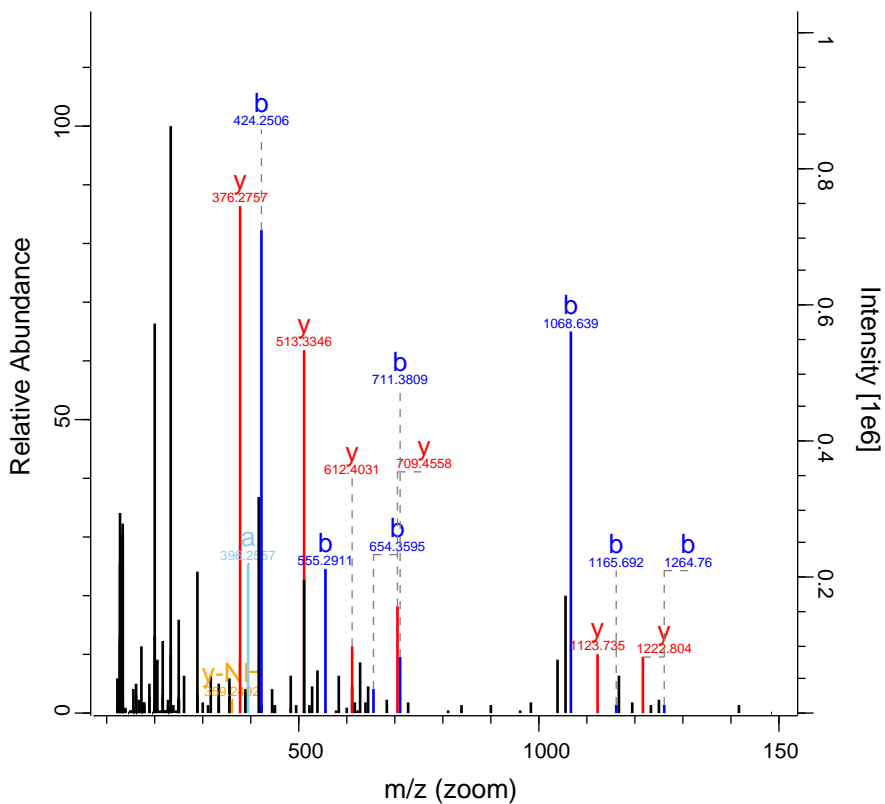

m/z (zoom)

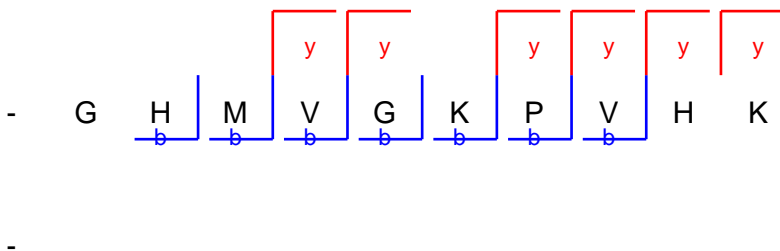



RO-QC-160121\_ZackD\_SS\_Set\_01\_Fraction 6940 FTMS; HC 124.42 739.42 BBX

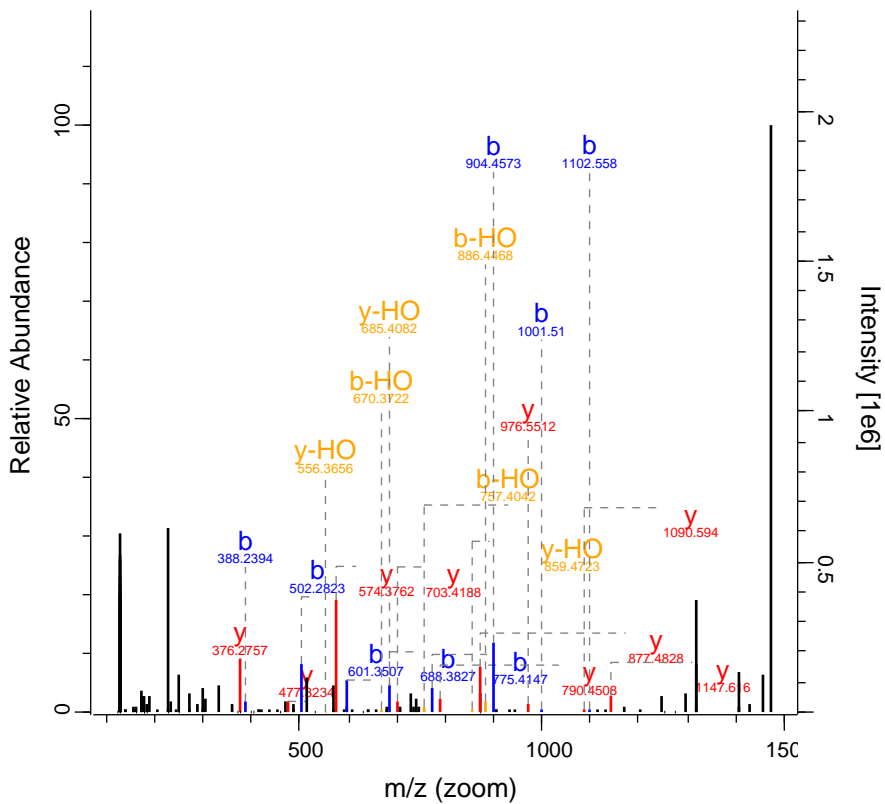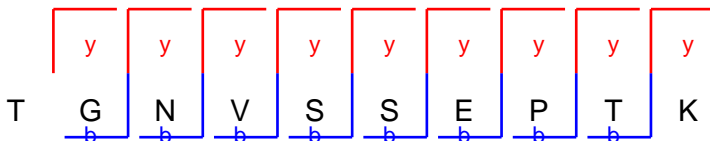





RO-QC-160121\_ZackD\_SS\_Set\_01\_Fraction 7399 FTMS; HC 140.17 659.84 FKRP

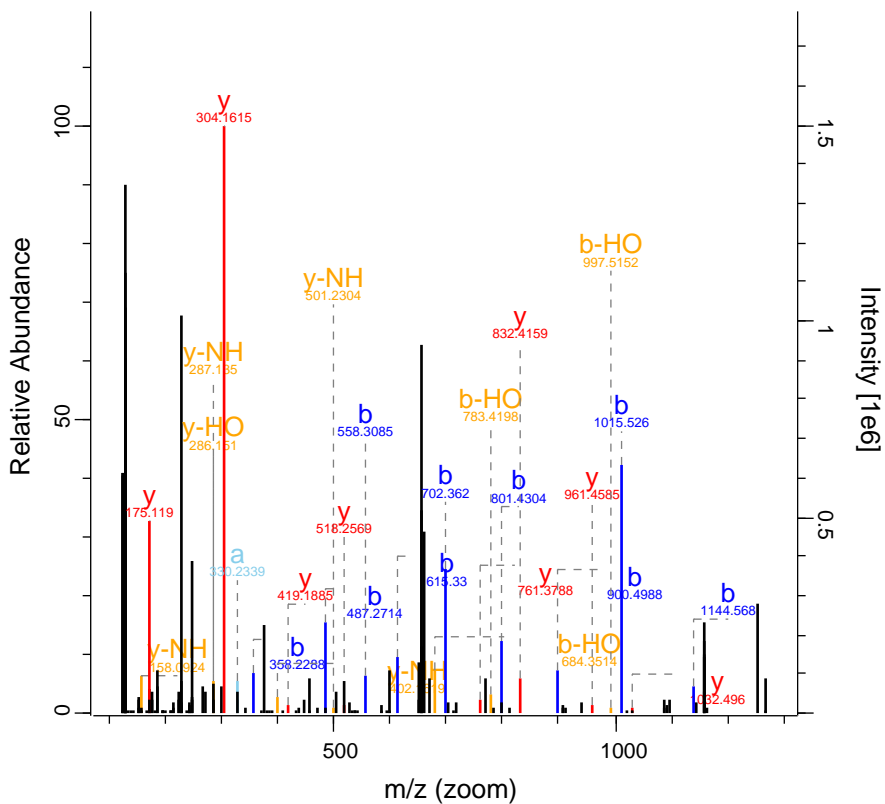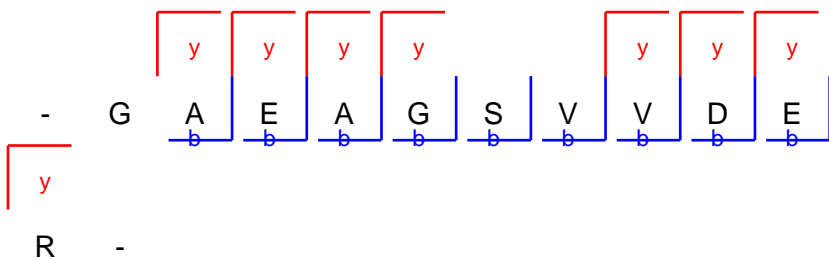

RO-QC-160121\_ZackD\_SS\_Set\_01\_Fraction 7820 FTMS; HCl 56.12 699.39 SLC7A6

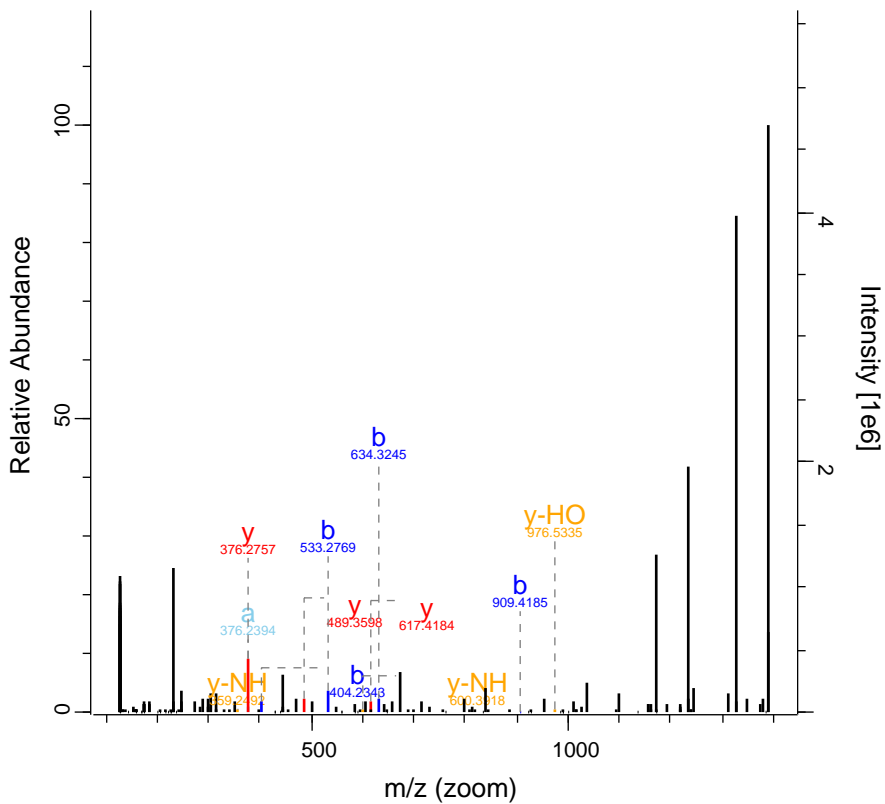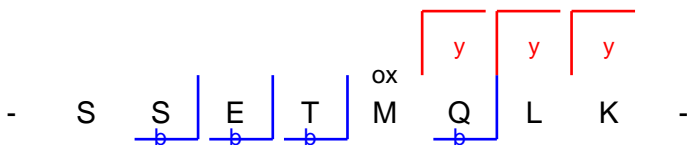

RO-QC-160121\_ZackD\_SS\_Set\_01\_Fraction9128 FTMS; HCl 153.54 779.9 SLC39A1

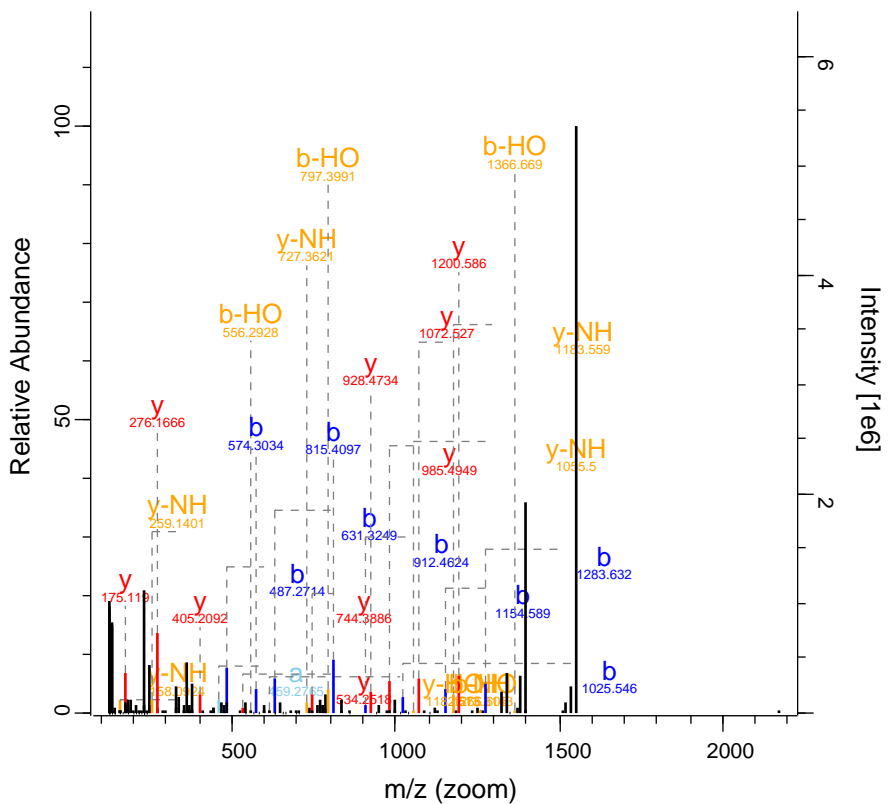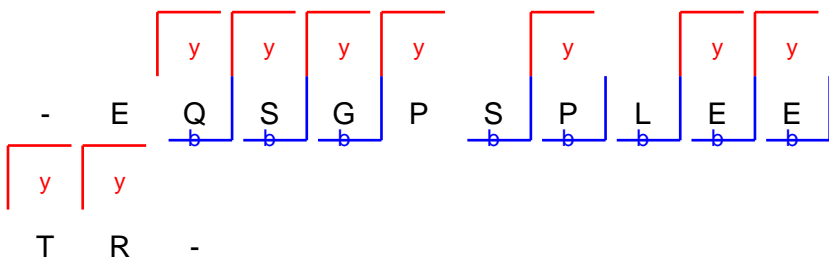

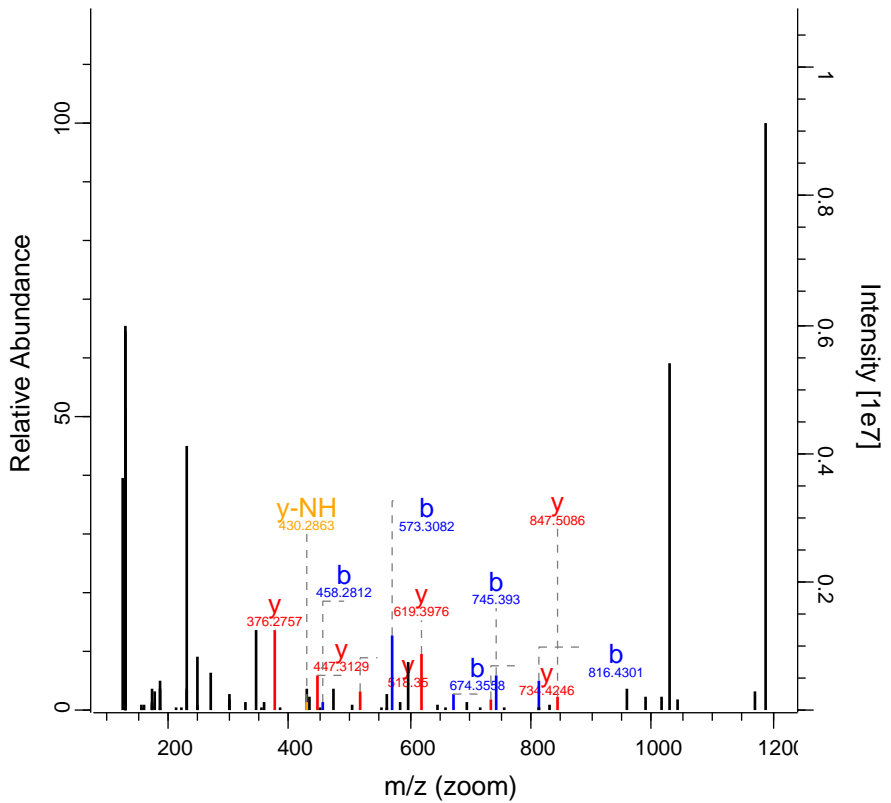



RO-QC-160121\_ZackD\_SS\_Set\_01\_Fraction11312 FTMS; HC 83.26 623.87 TMEM141

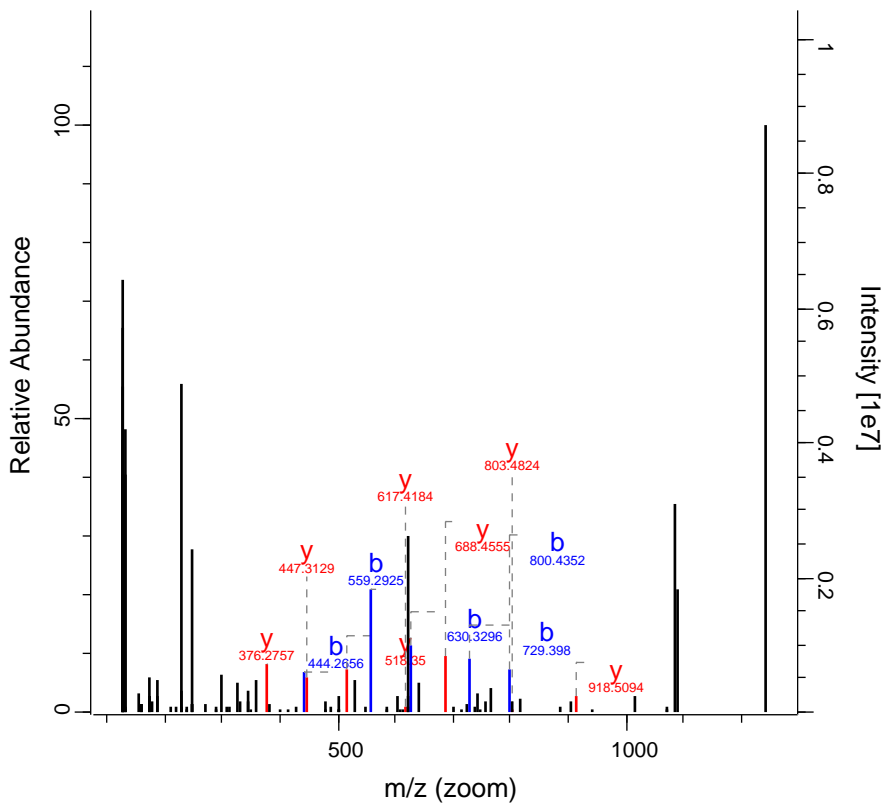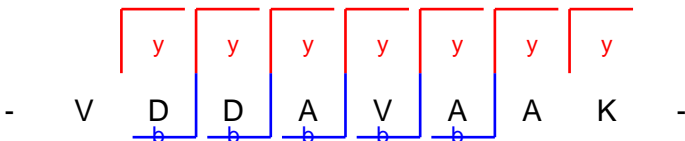

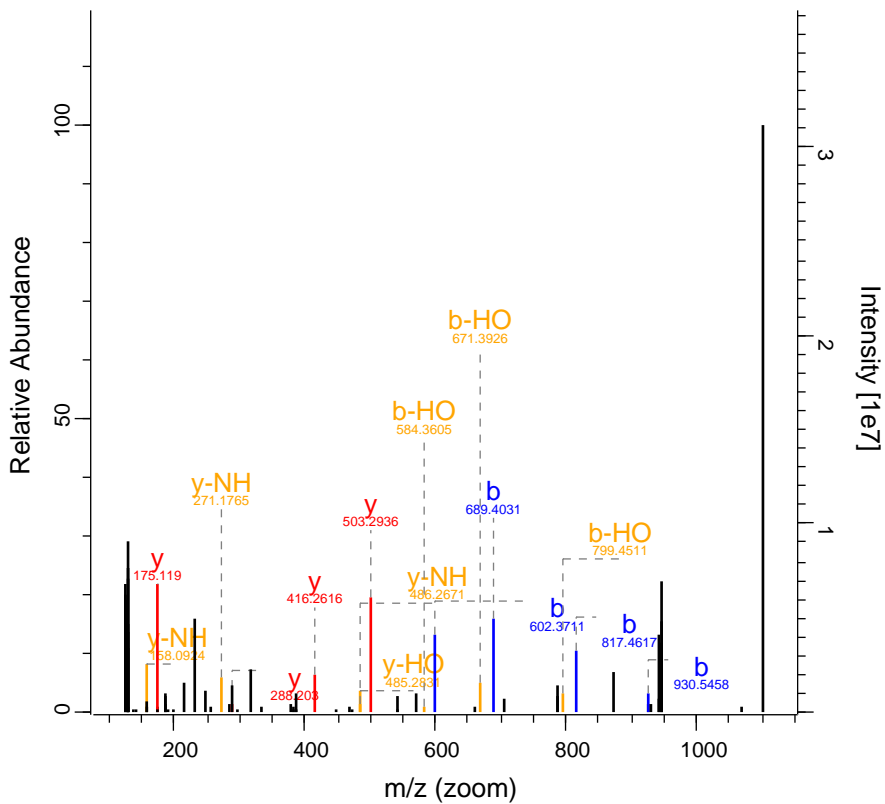



RO-QC-160121\_ZackD\_SS\_Set\_01\_Fractio 11570 FTMS; HC 107.66 623.87 TMEM141

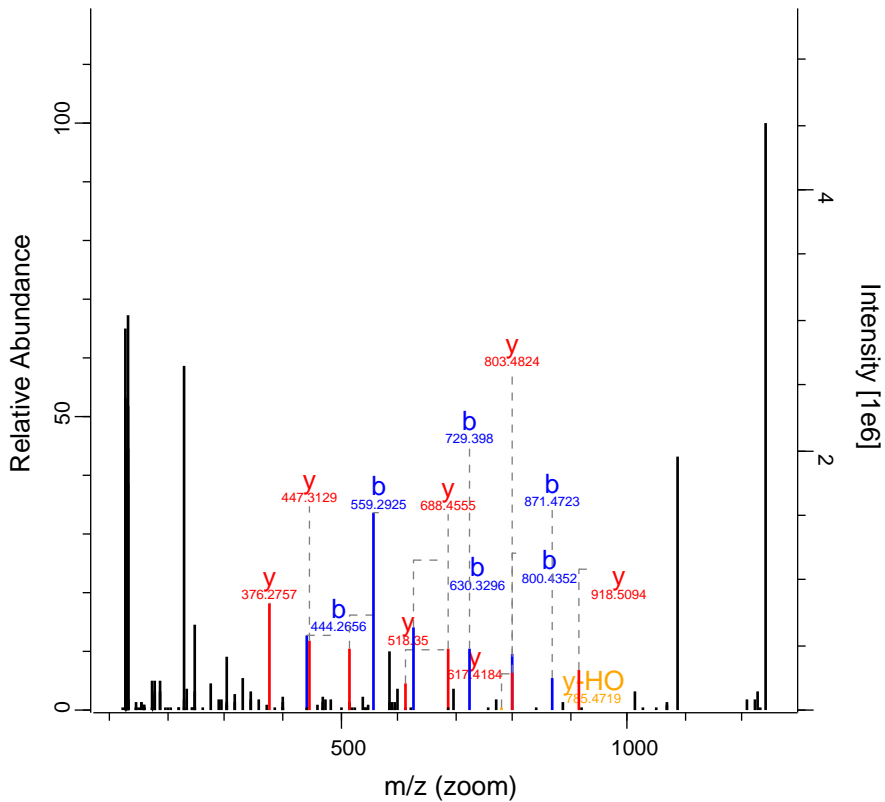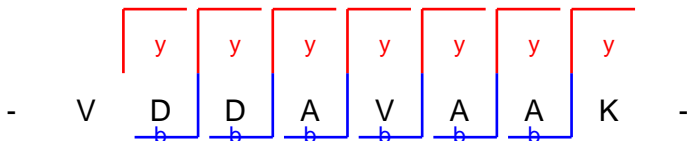

RO-QC-160121\_ZackD\_SS\_Set\_01\_Fractio 11647 FTMS; HC 130.98 804.44 MRPL34

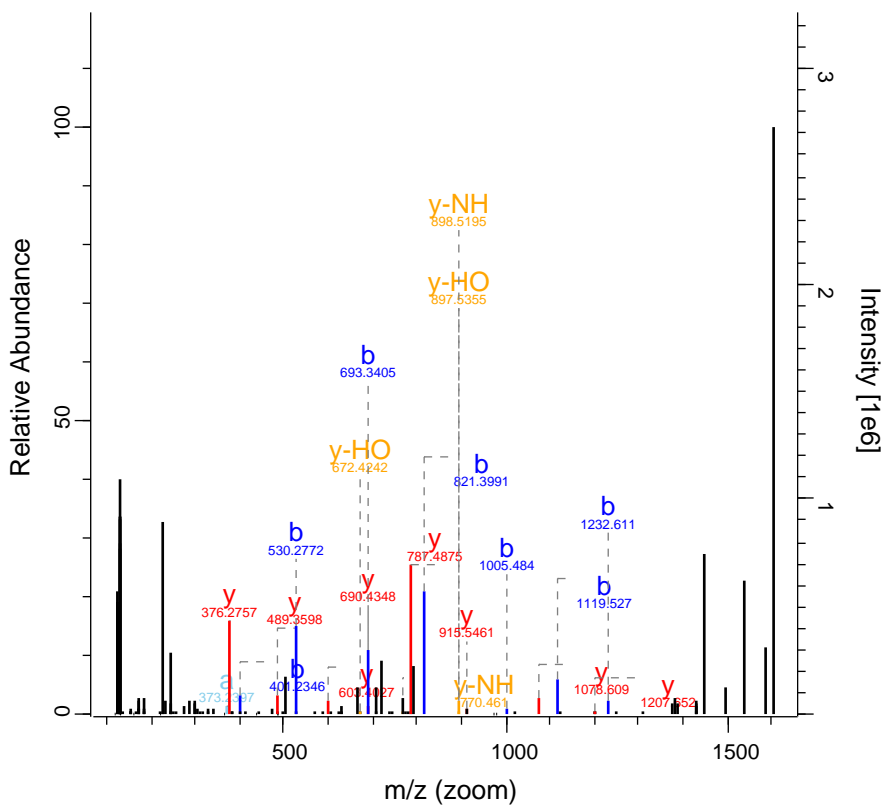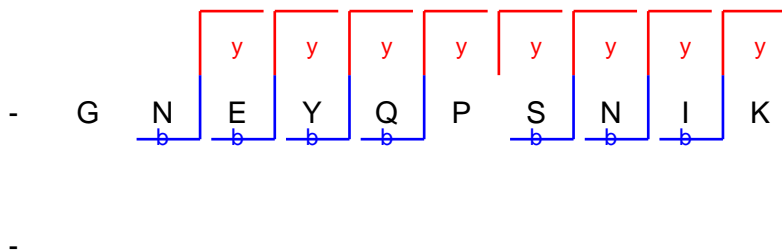

RO-QC-160121\_ZackD\_SS\_Set\_01\_Fraction\_7

12214 FTMS; HCD 53.47 755.37

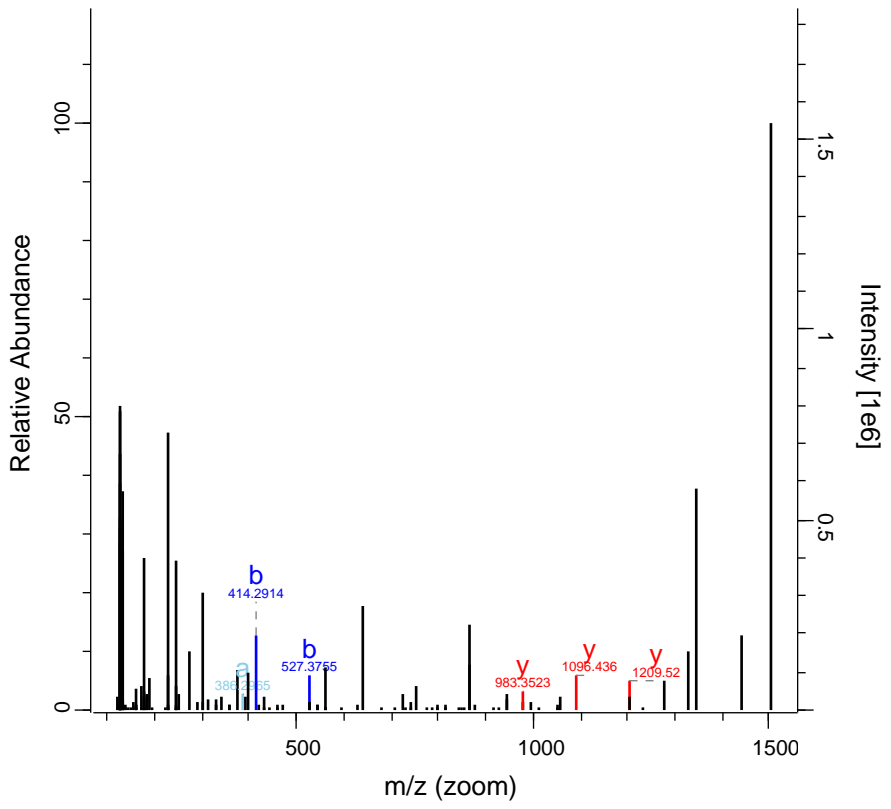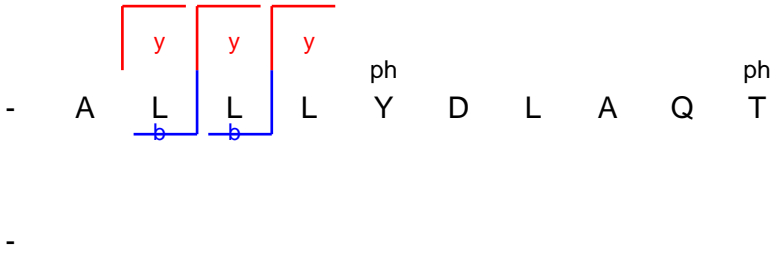

RO-QC-160121\_ZackD\_SS\_Set\_01\_Fractio 13426 FTMS; HC 123.42 724.88 WDFY2

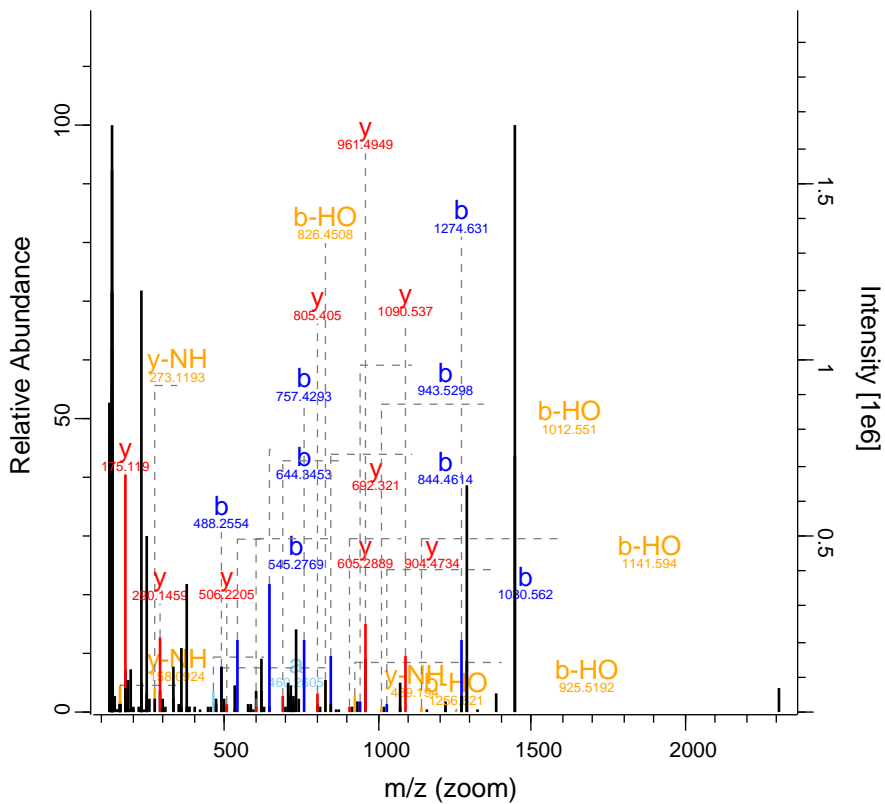

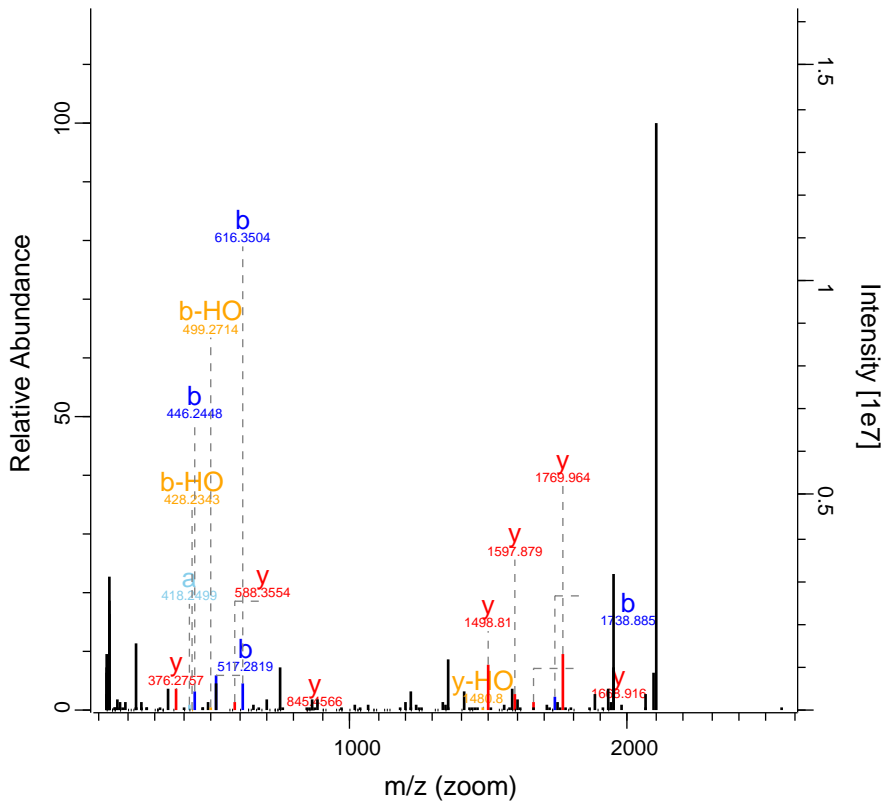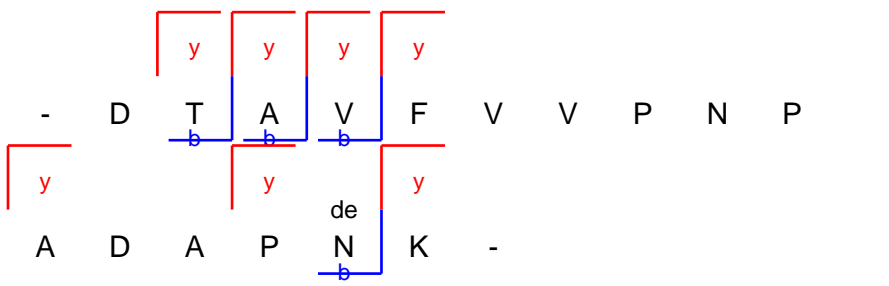

RO-QC-160121\_ZackD\_SS\_Set\_01\_Fraction 14460 FTMS; HC 41.65 621.42 OFCC1

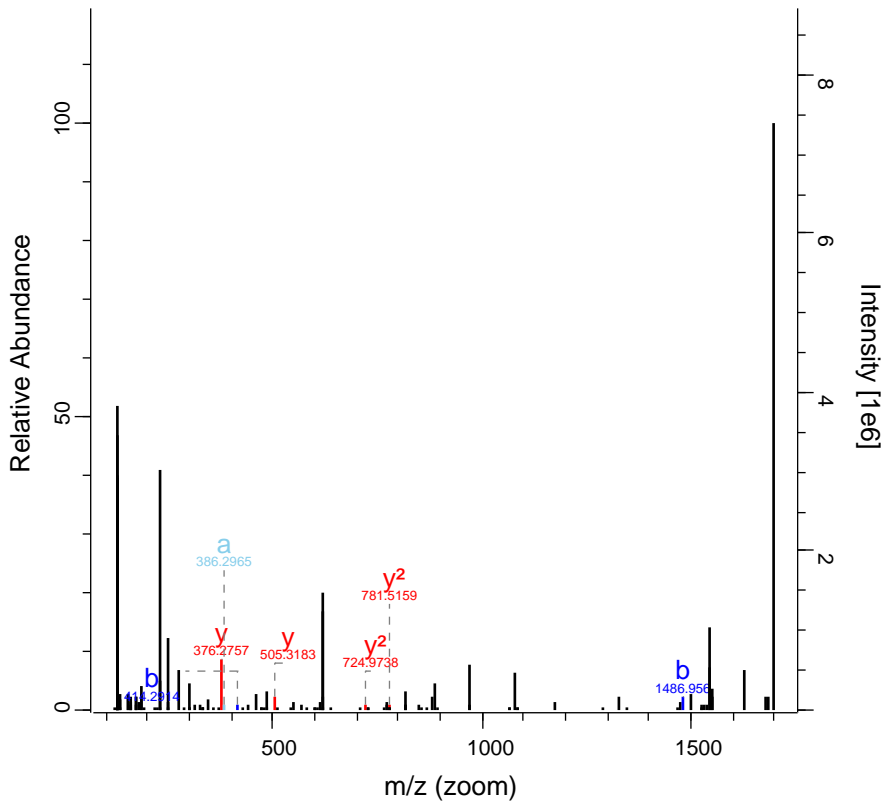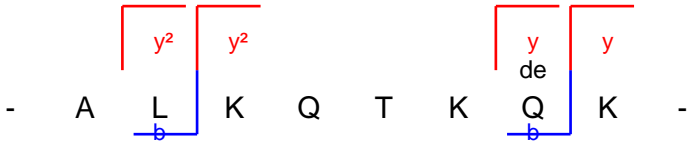

RO-QC-160121\_ZackD\_SS\_Set\_01\_Fraction 18691 FTMS; HC 43.99 683.41 KCTD19

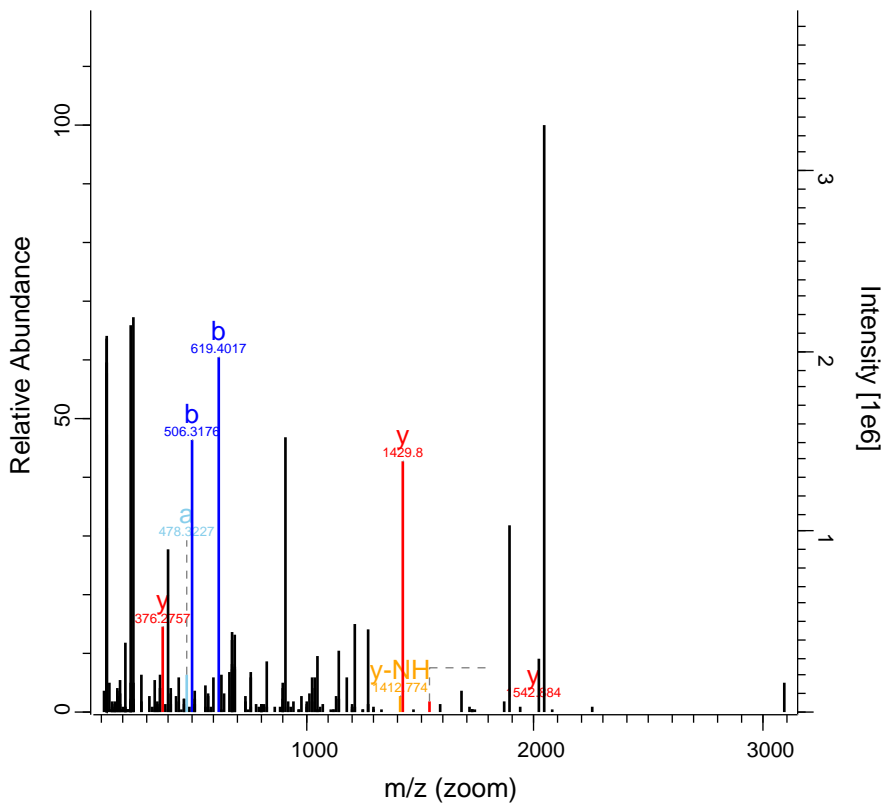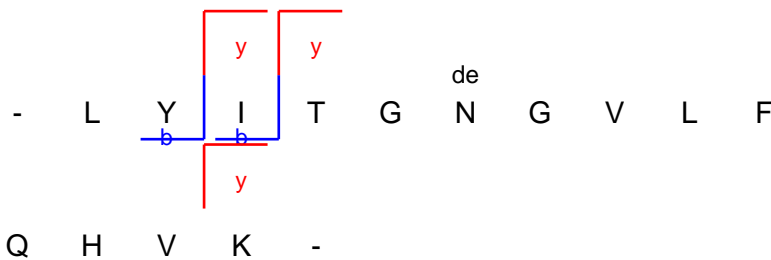

RO-QC-160121\_ZackD\_SS\_Set\_01\_Fractic 20382 FTMS; HC 76.14 1134.08 SPTLC3

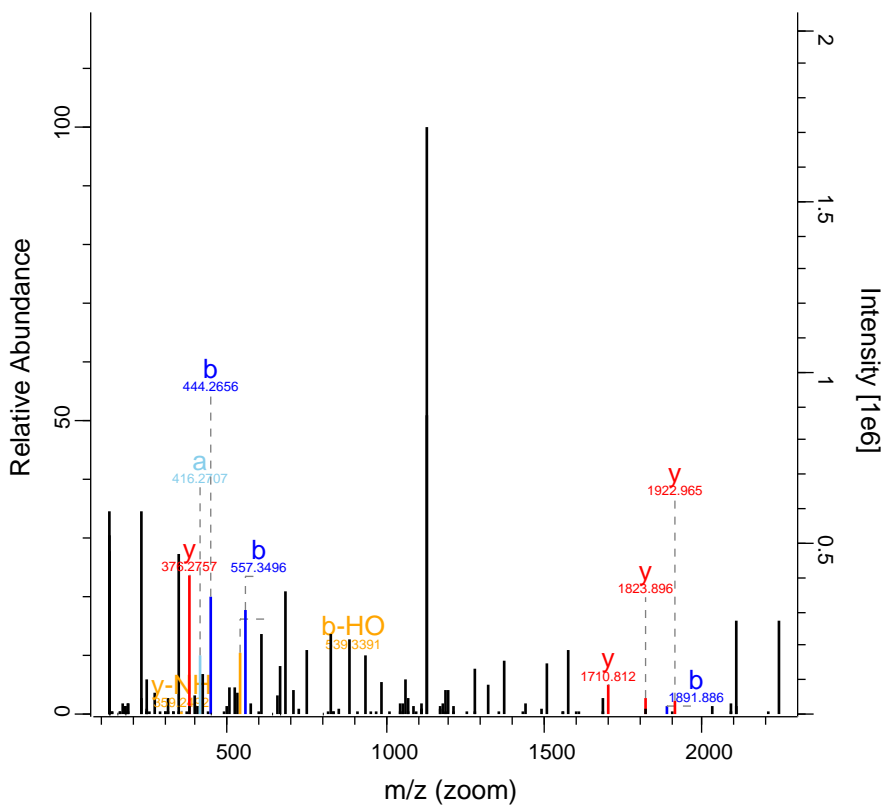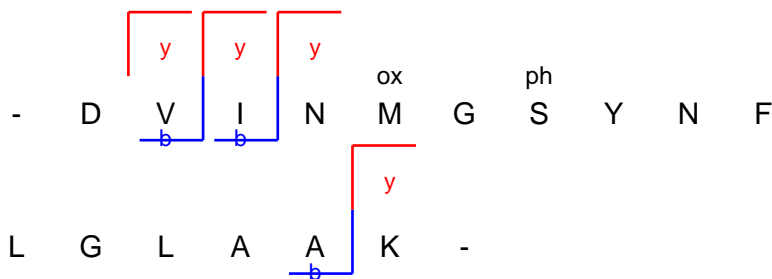



RO-QC-160121\_ZackD\_SS\_Set\_01\_Fraction 20401 FTMS; HC 50.35 543.67 FKBP11

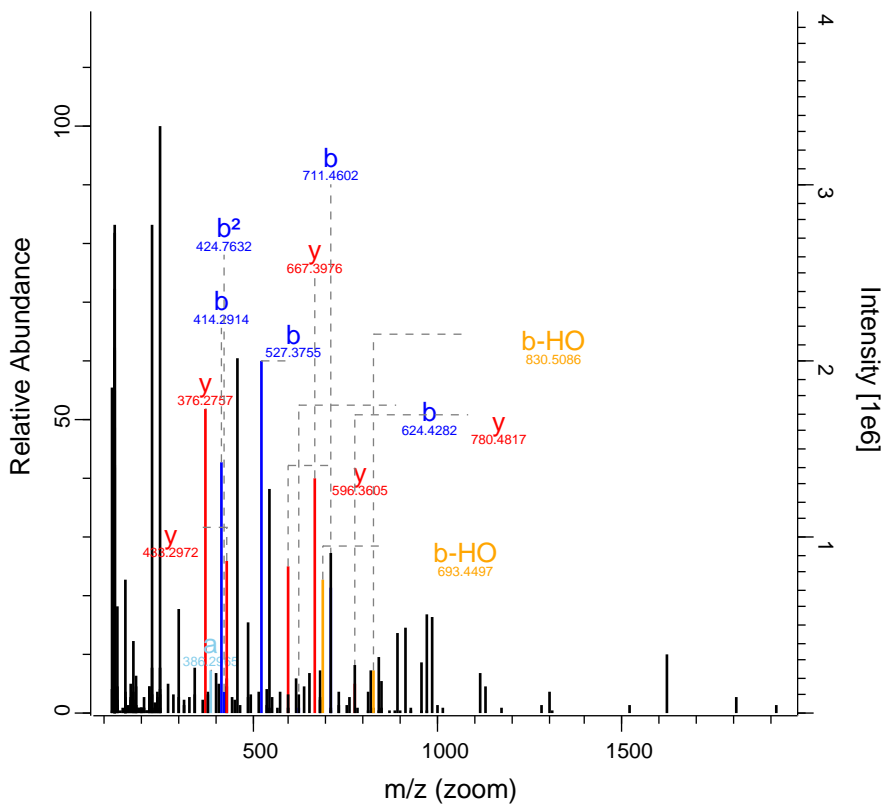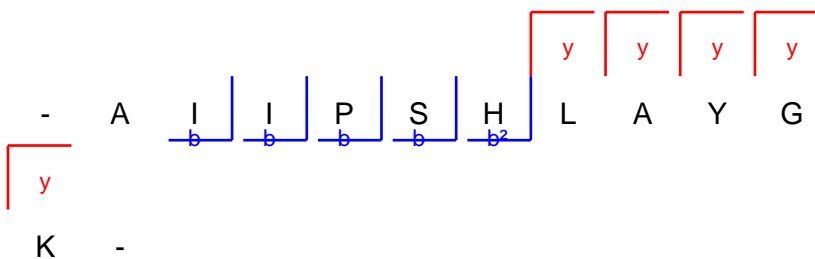

K -

RO-QC-160121\_ZackD\_SS\_Set\_01\_Fraction 20507 FTMS; HCl 123.35 814.5 FKBP11

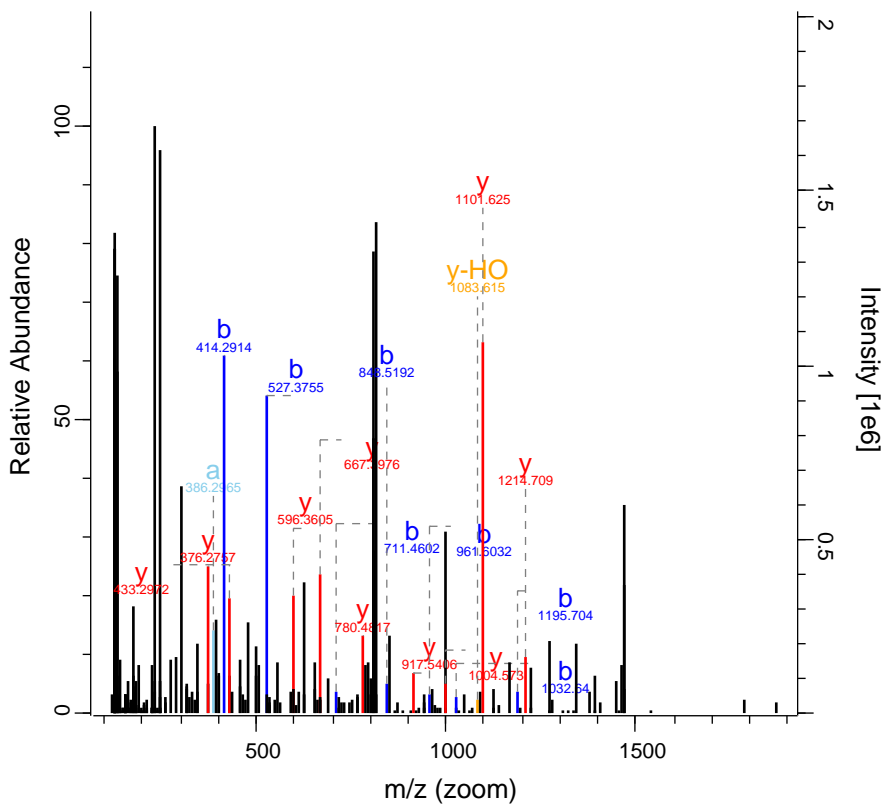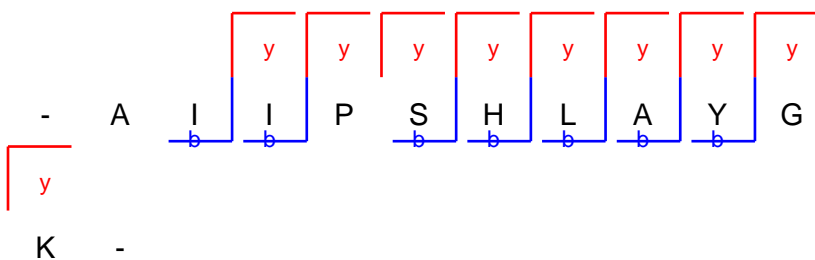

K -

RO-QC-160121\_ZackD\_SS\_Set\_01\_Fraction 20762 FTMS; HC 41.38 749.11 ACMSD

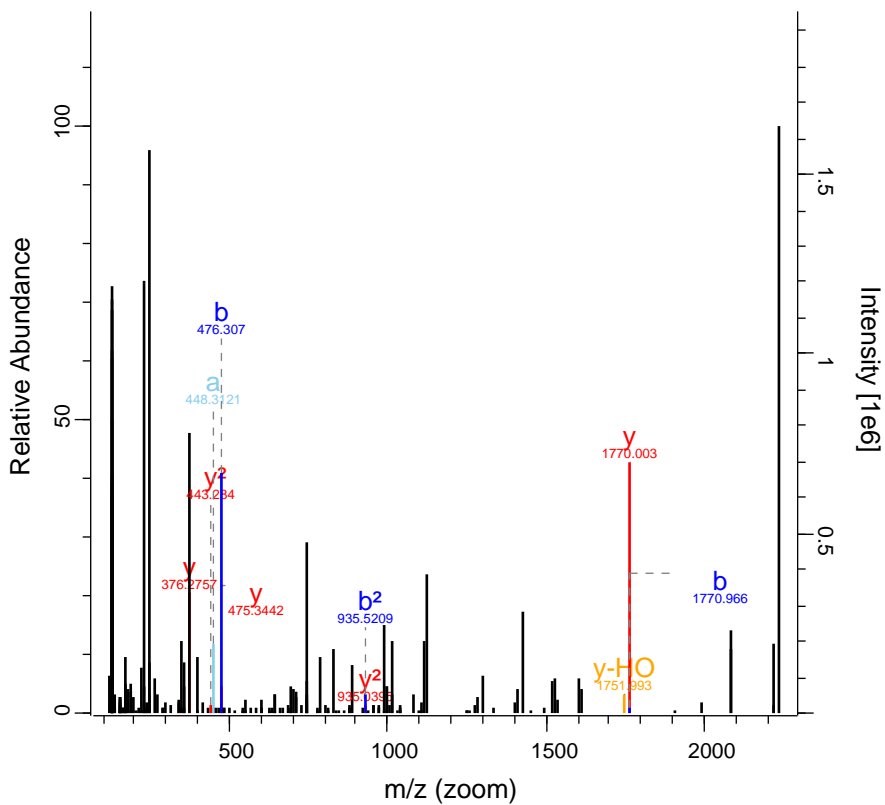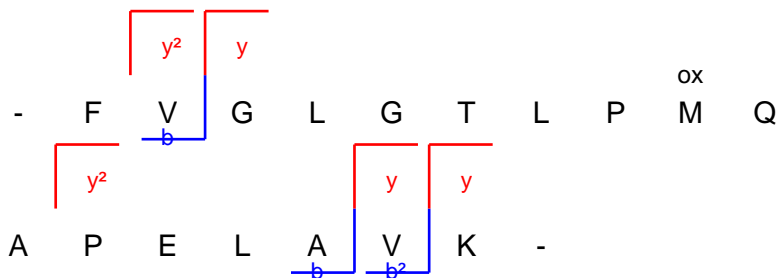

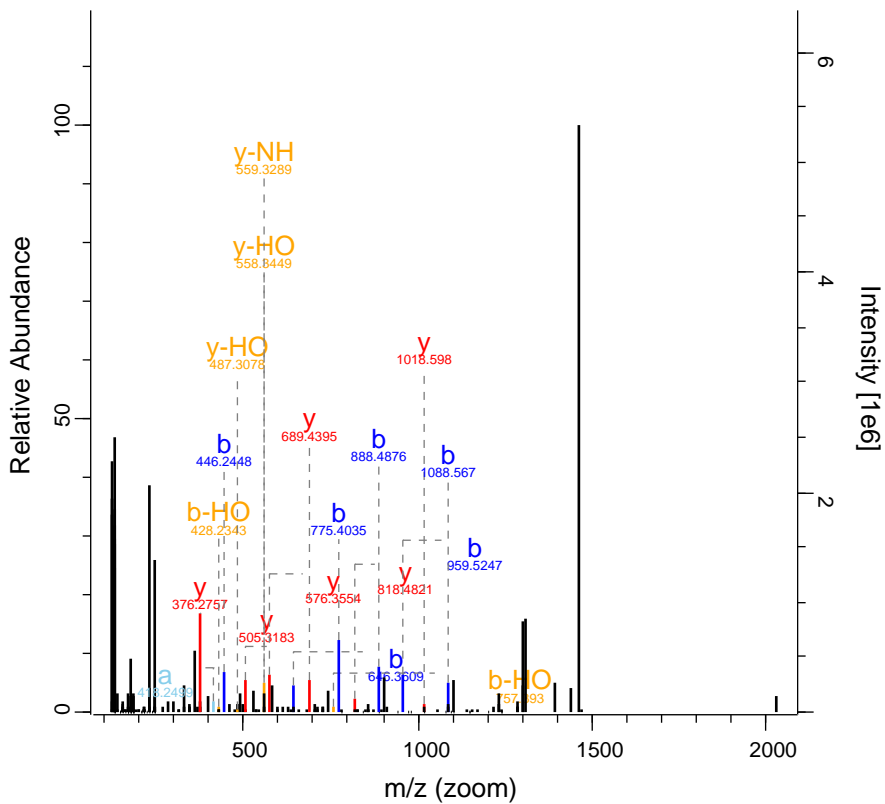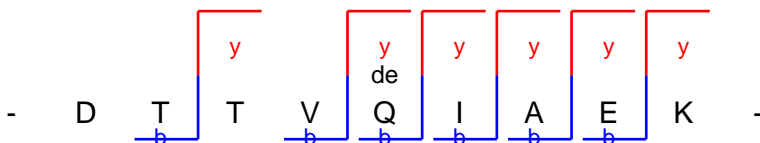

RO-QC-160121\_ZackD\_SS\_Set\_01\_Fraction 22281 FTMS; HC 79.69 453.26 YPEL5

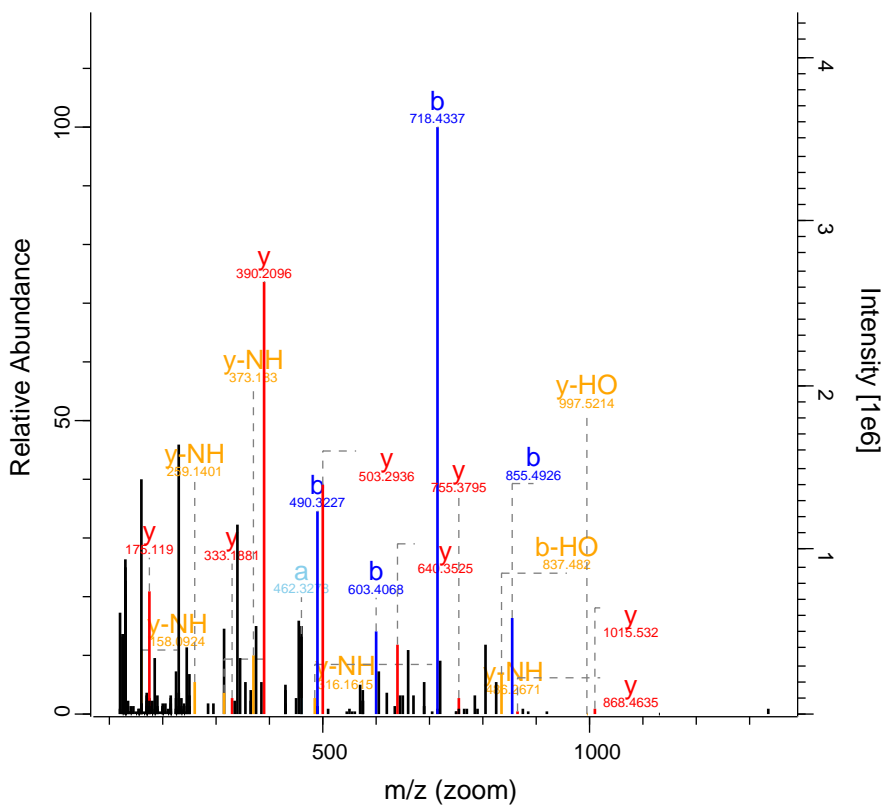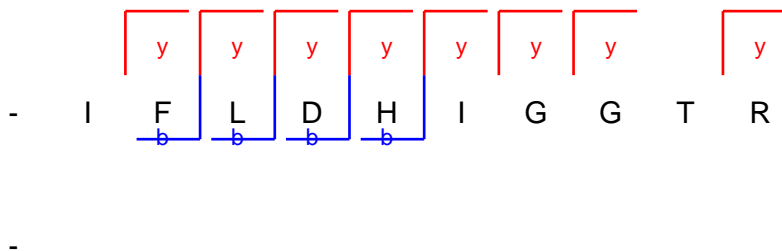

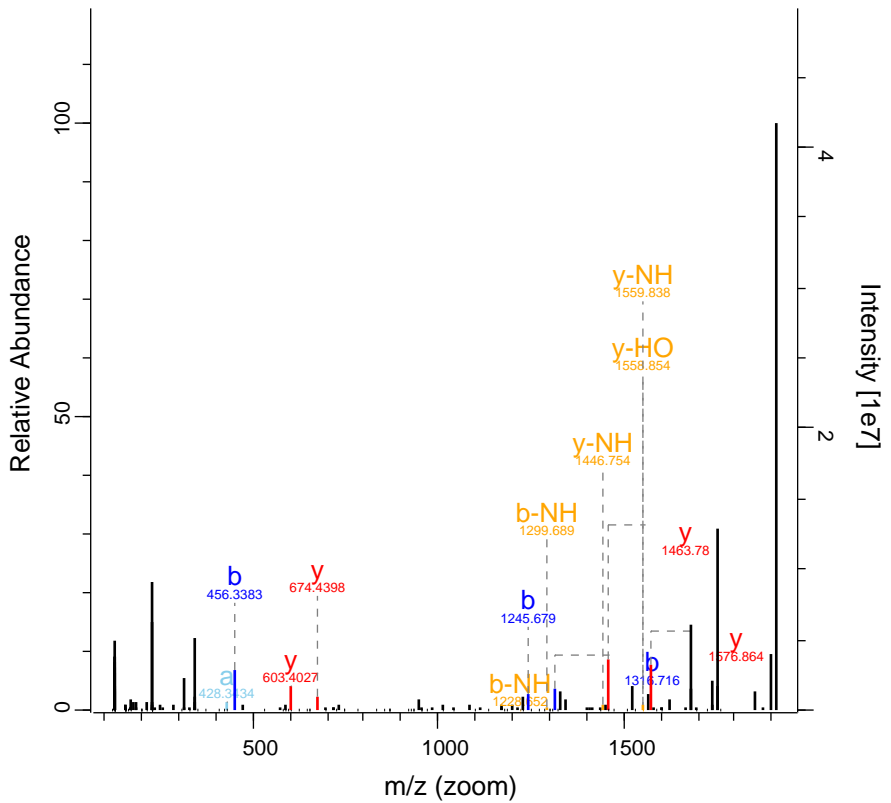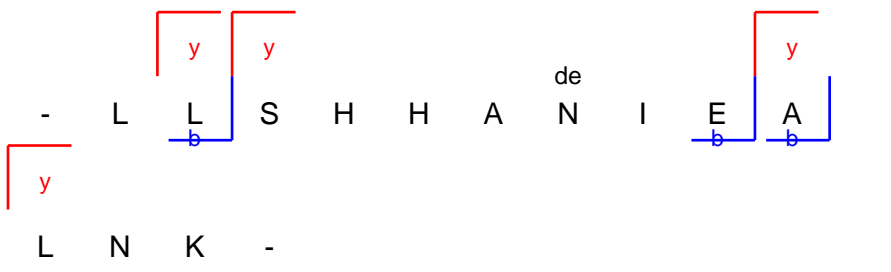

RO-QC-160121\_ZackD\_SS\_Set\_01\_Fractio 24445 FTMS; HC 144.17 803.41 SMIM4

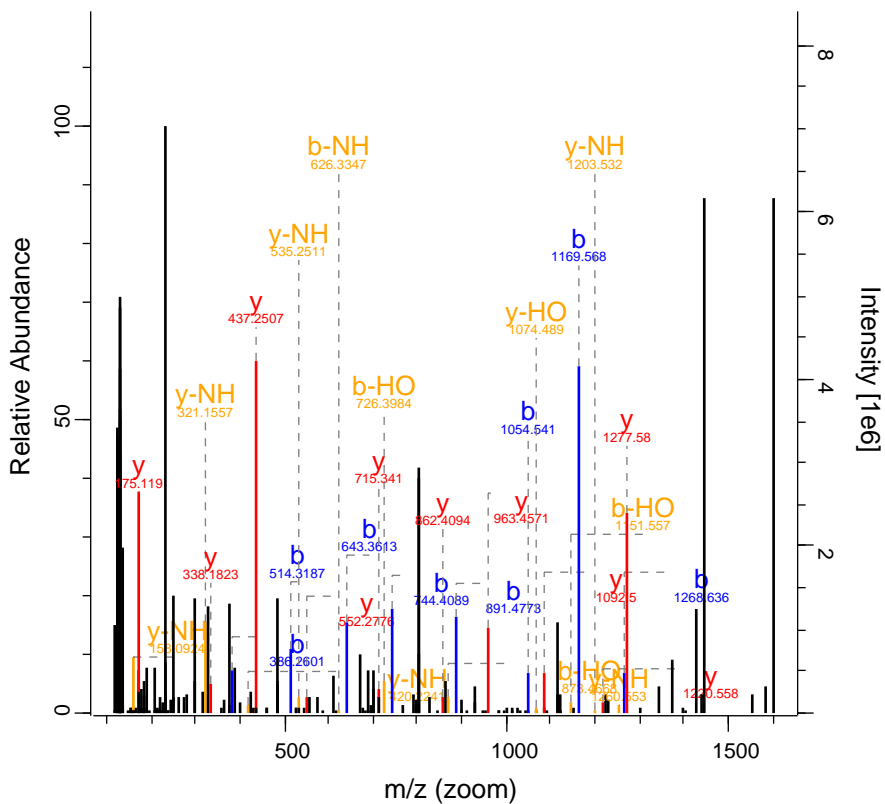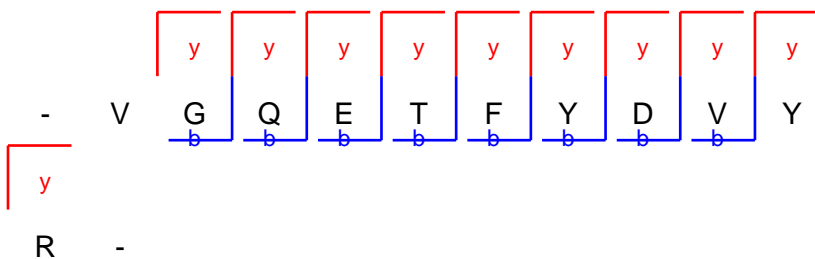

RO-QC-160121\_ZackD\_SS\_Set\_01\_Fraction 26834 FTMS; HC 54.41 902.59 FHAD1

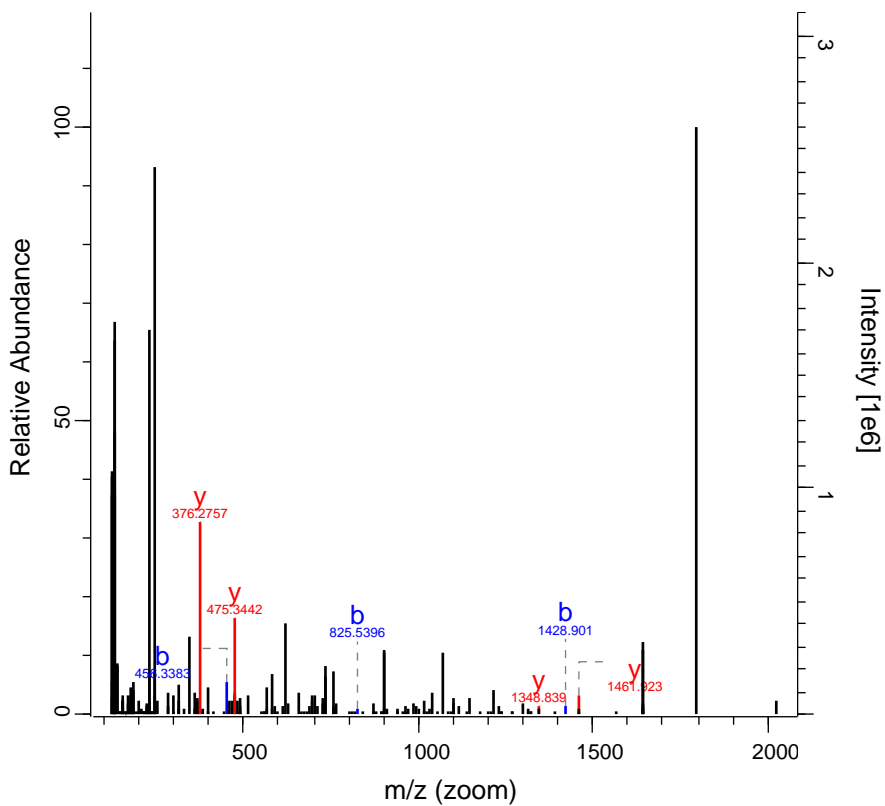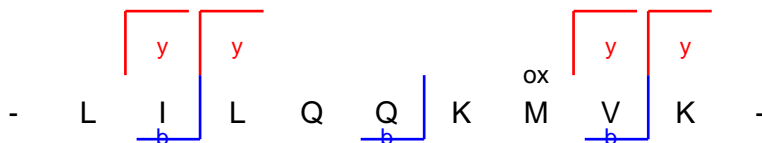



| Raw File                                | Scan  | Method    | Score | m/z    |
|-----------------------------------------|-------|-----------|-------|--------|
| RO-QC-160121_ZackD_SS_Set_01_Fraction_7 | 27428 | FTMS; HCD | 62.82 | 969.04 |

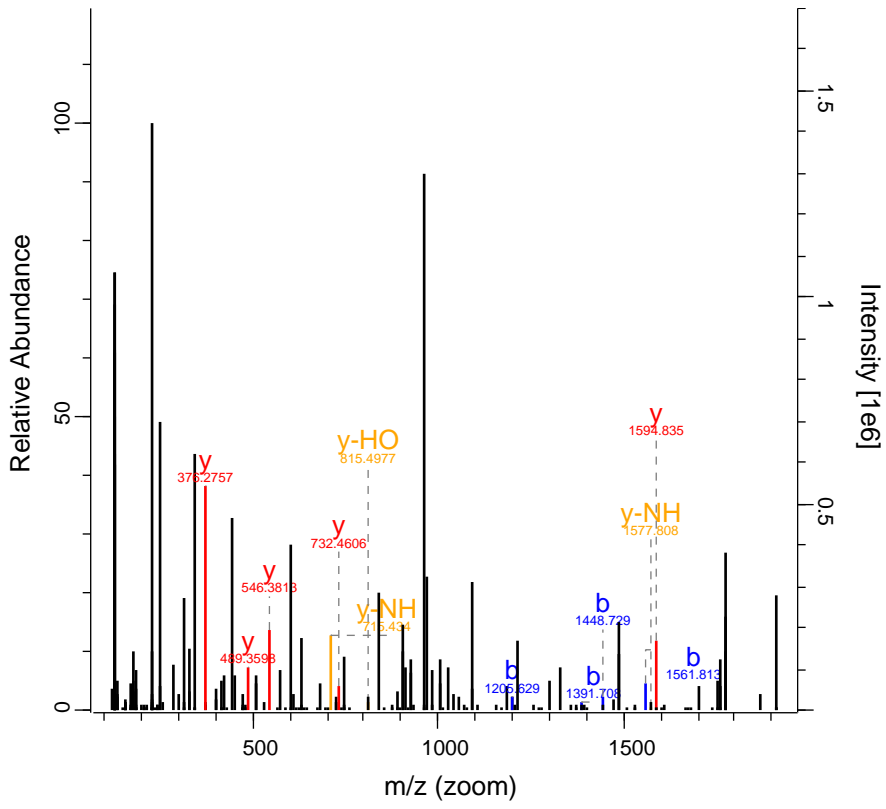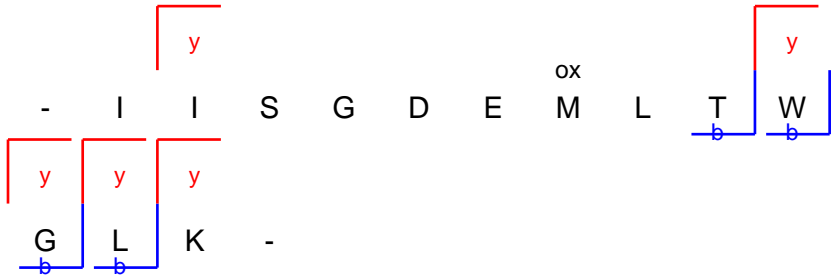

RO-QC-160121\_ZackD\_SS\_Set\_01\_Fractio 27526 FTMS; HC 165.83 837.97 RGR

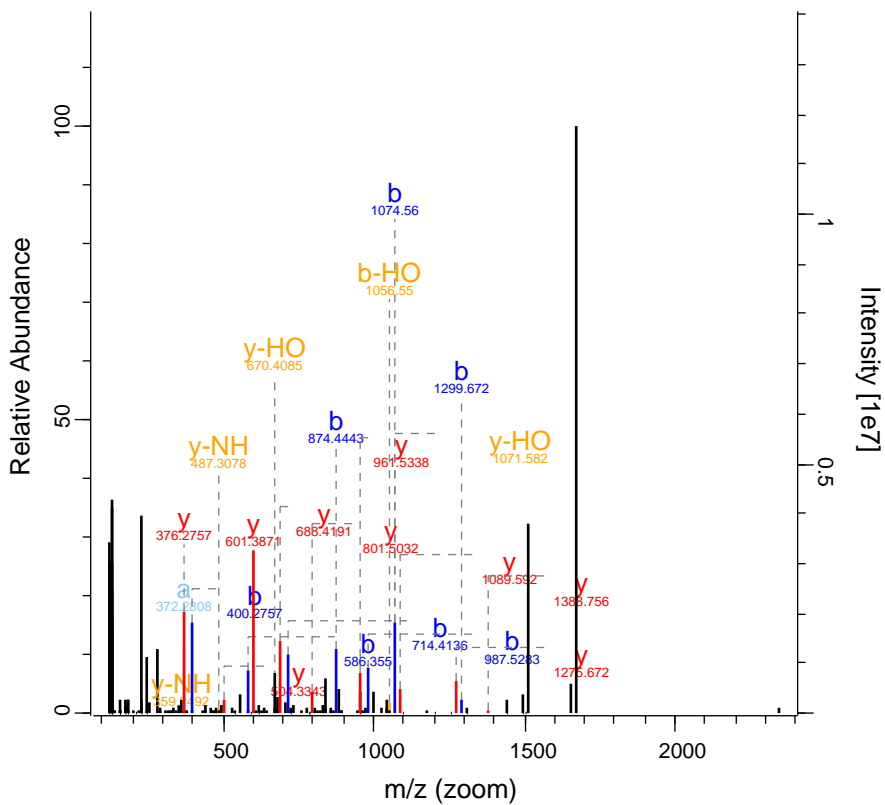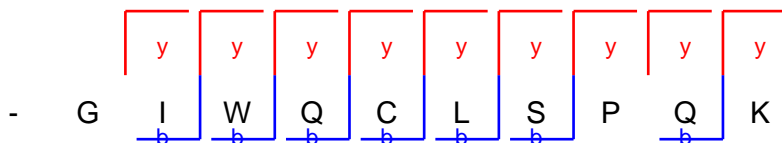

RO-QC-160121\_ZackD\_SS\_Set\_01\_Fractic 27986 FTMS; HC 54.61 1075.59 DRAXIN

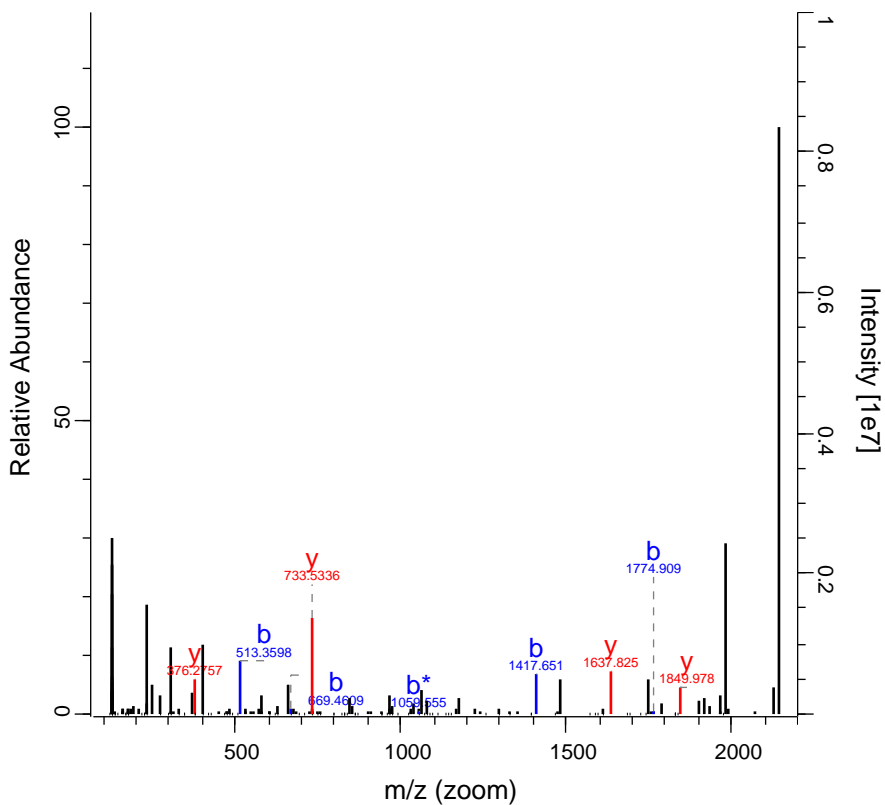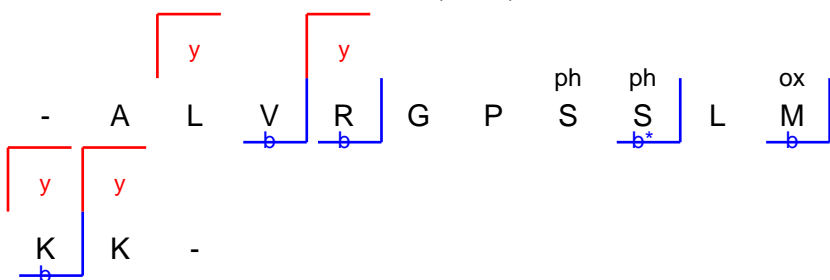

RO-QC-160121\_ZackD\_SS\_Set\_01\_Fraction 28306 FTMS; HC 87.57 692.05 NACAP1

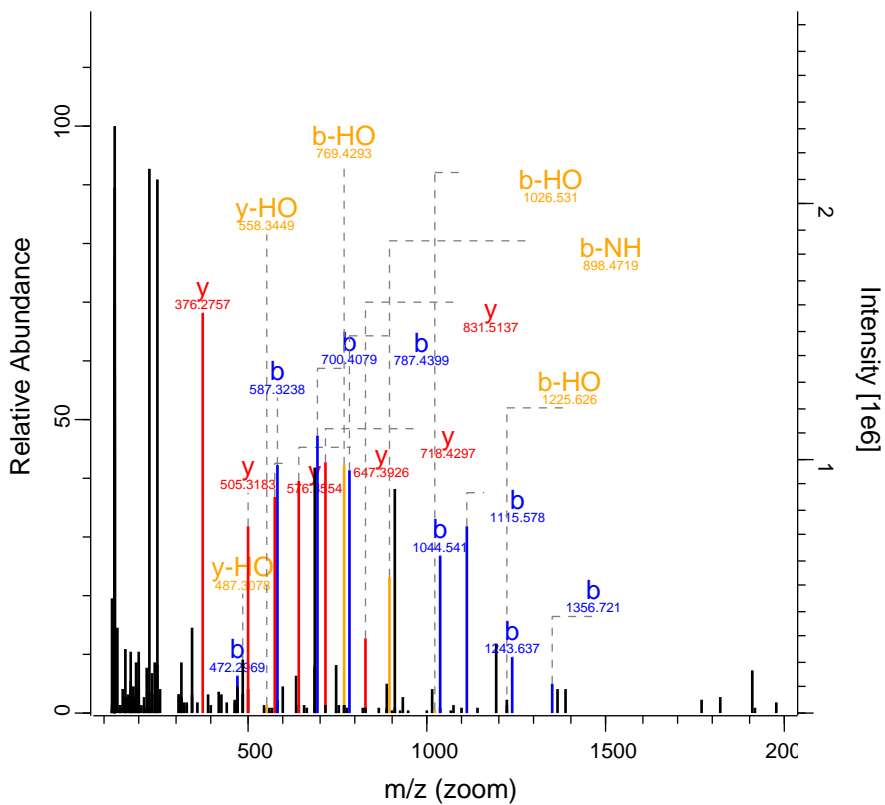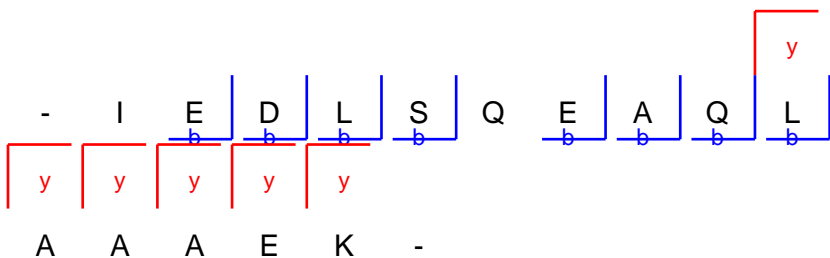

Raw File Scan Method Score m/z

RO-QC-160121\_ZackD\_SS\_Set\_01\_Fraction\_7 28564 FTMS; HCD 63.28 1137.17

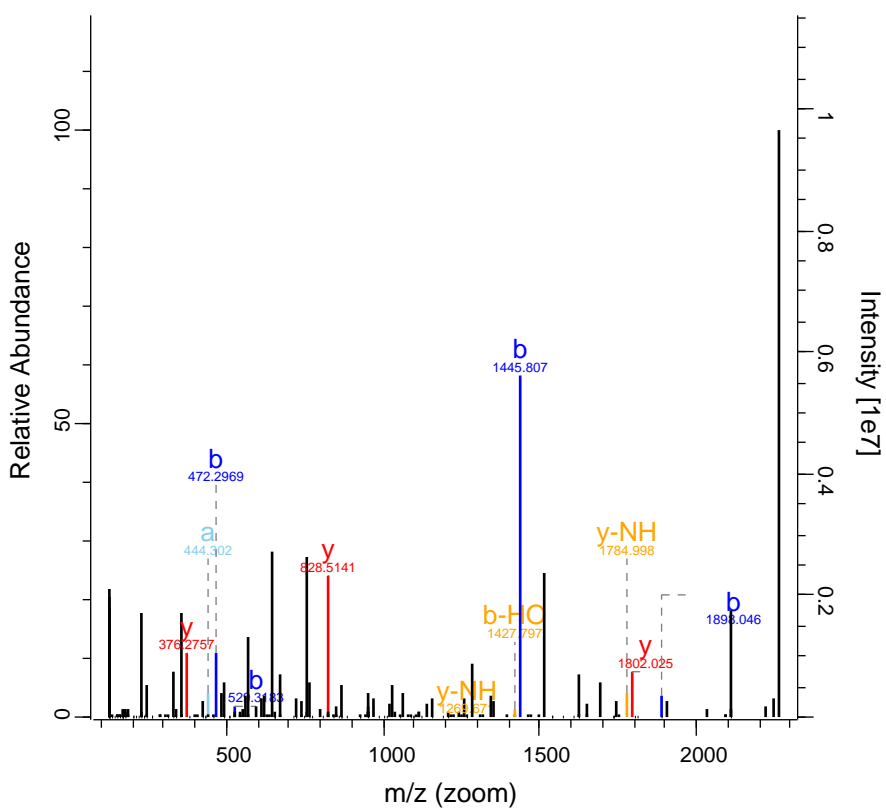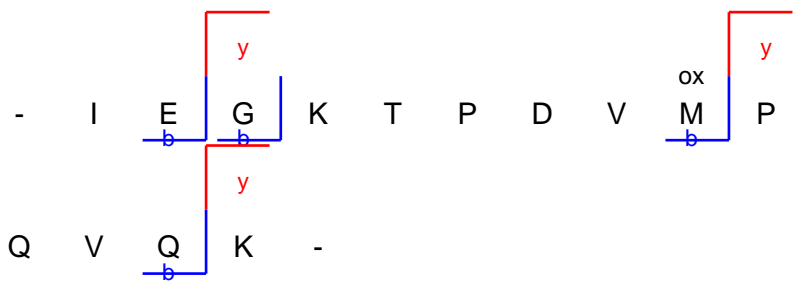

RO-QC-160121\_ZackD\_SS\_Set\_01\_Fractic 28874 FTMS; HC 50.3 1740.91 POU6F2

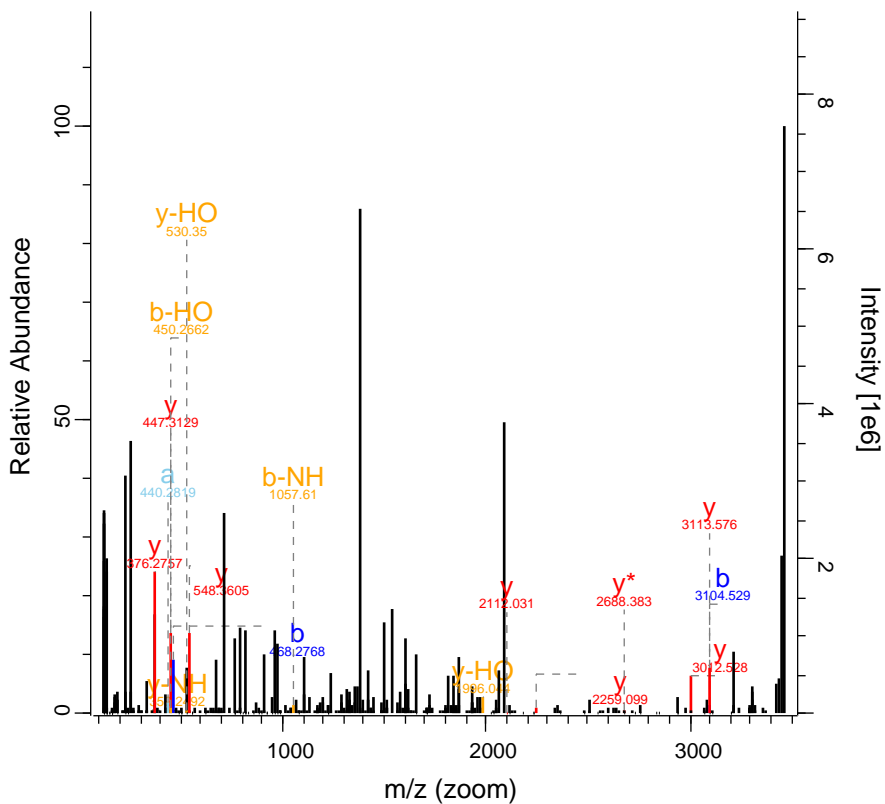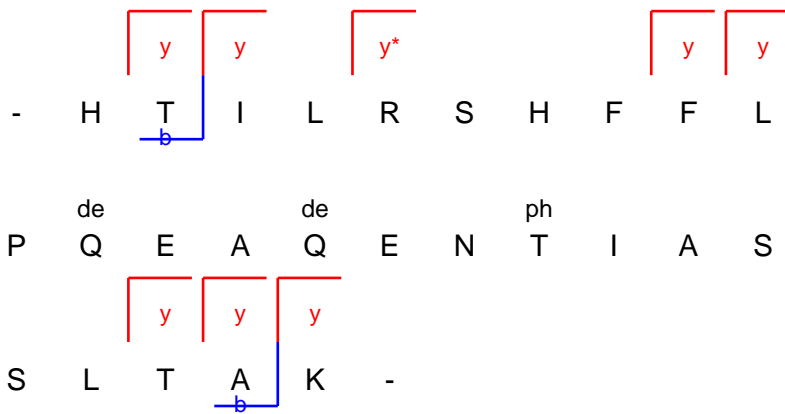

RO-QC-160121\_ZackD\_SS\_Set\_01\_Fraction 28980 FTMS; HC 88.73 429.26 KRT82

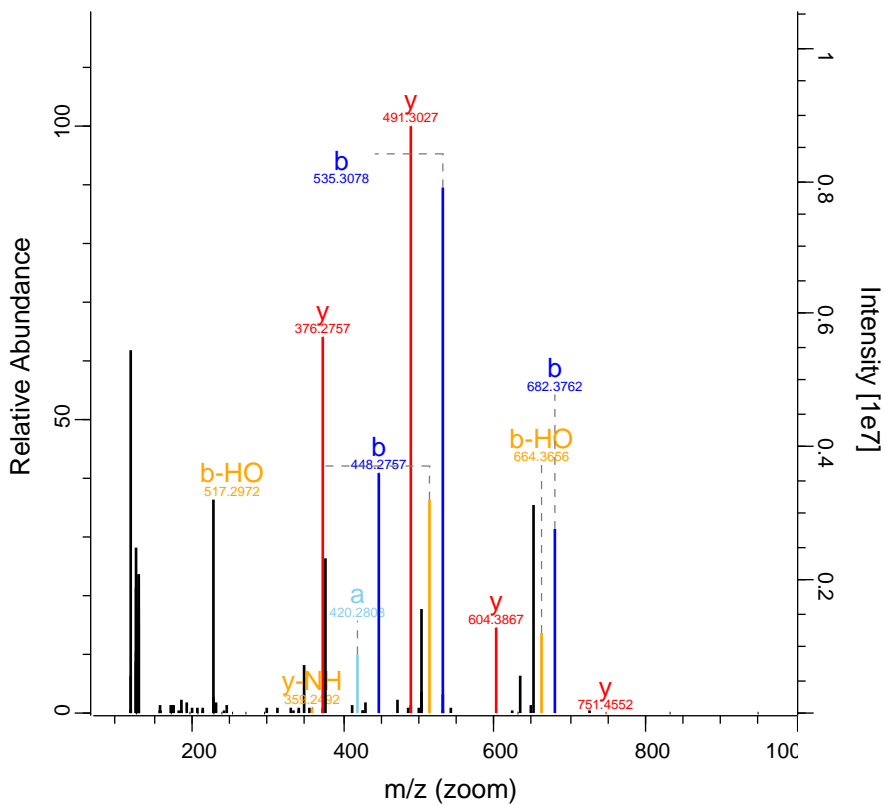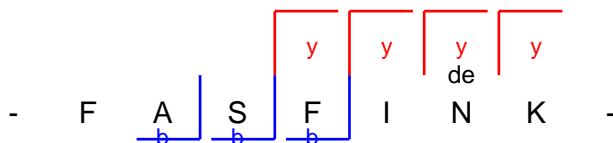





RO-QC-160121\_ZackD\_SS\_Set\_01\_Fraction 29249 FTMS; HC 88.73 429.26 KRT82

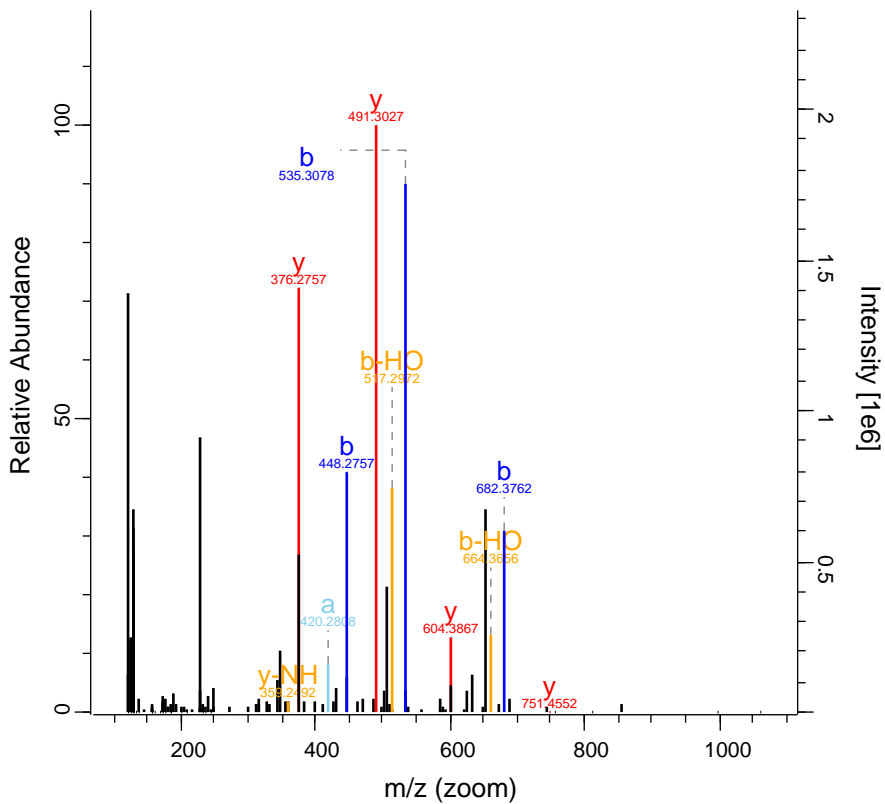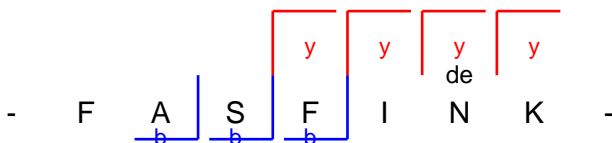

RO-QC-160121\_ZackD\_SS\_Set\_01\_Fractic 29871 FTMS; HC 55.45 1136.05 LGI4

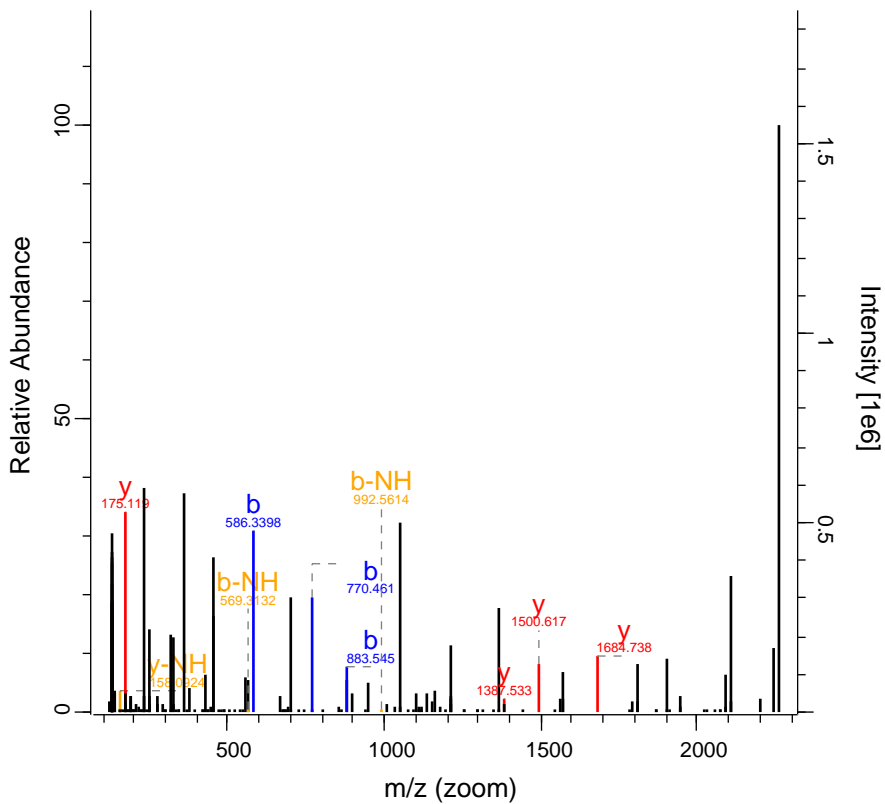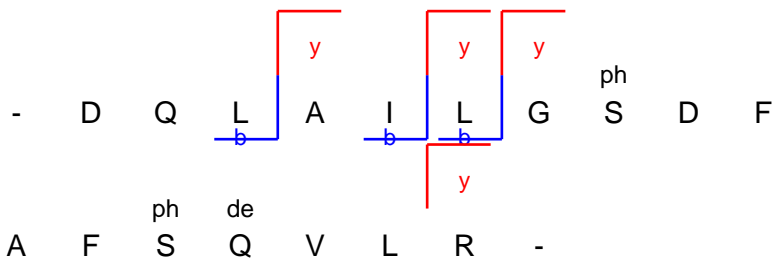

RO-QC-160121\_ZackD\_SS\_Set\_01\_Fractio 31295 FTMS; HC 119.27 701.46 UNC79

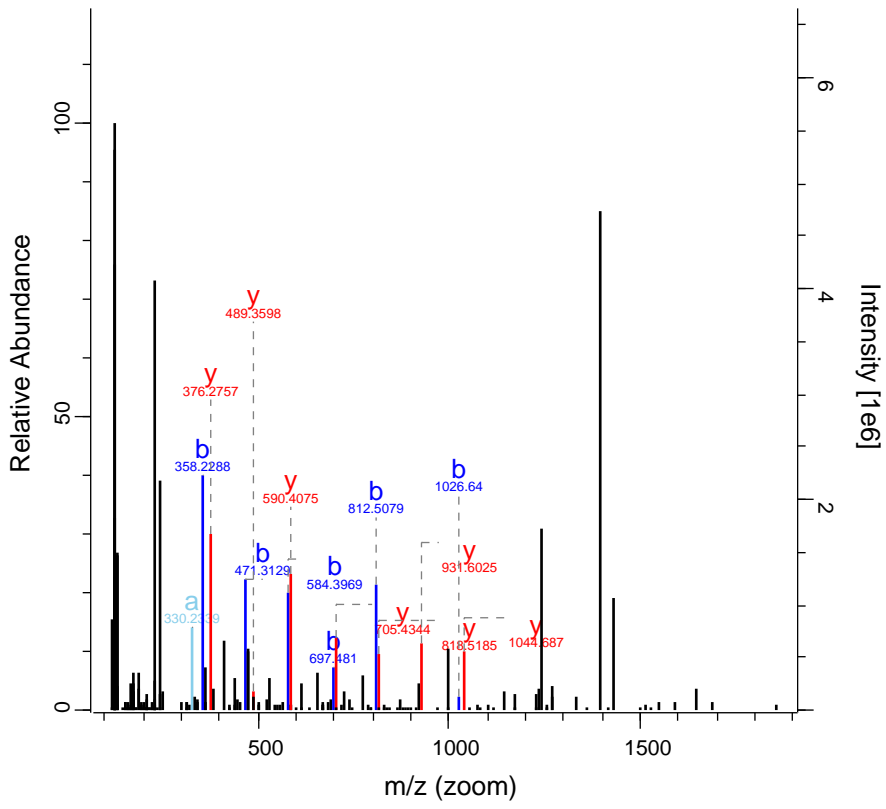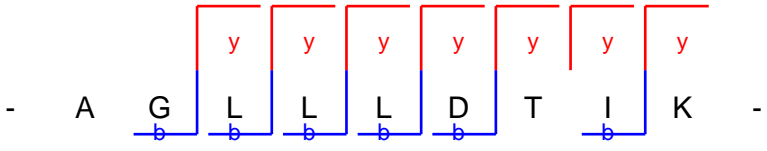



RO-QC-160121\_ZackD\_SS\_Set\_01\_Fractic 32769 FTMS; HC 54.98 1192.24 CEP70

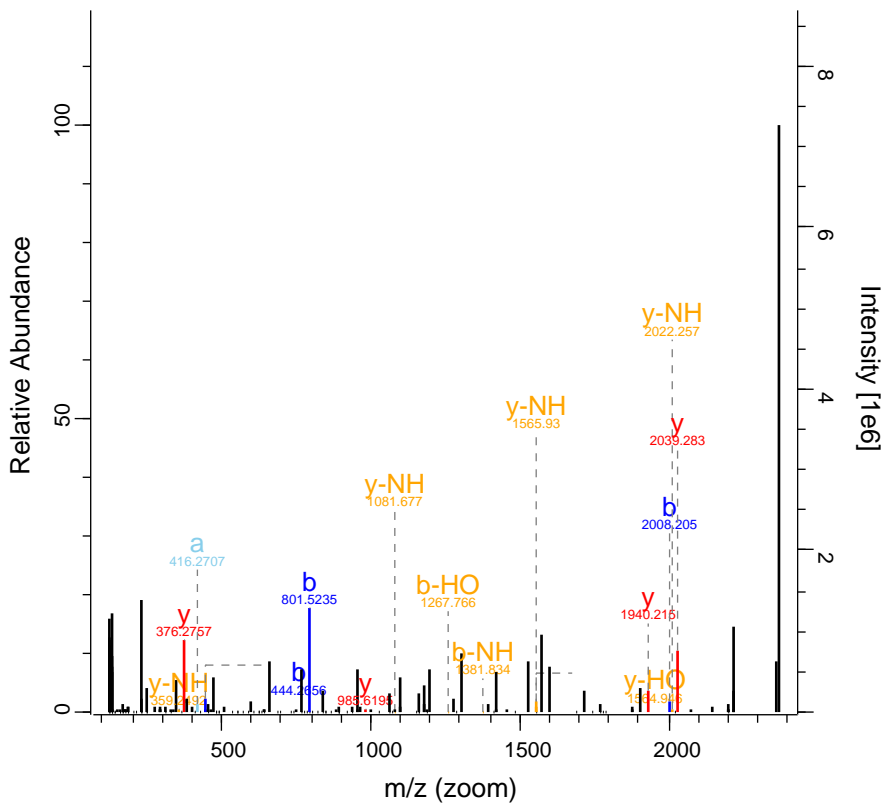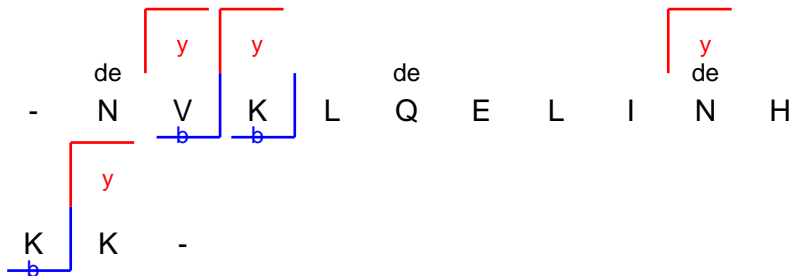

RO-QC-160121\_ZackD\_SS\_Set\_01\_Fractic 32858 FTMS; HC 200.16 1095.65 KRTCAP2

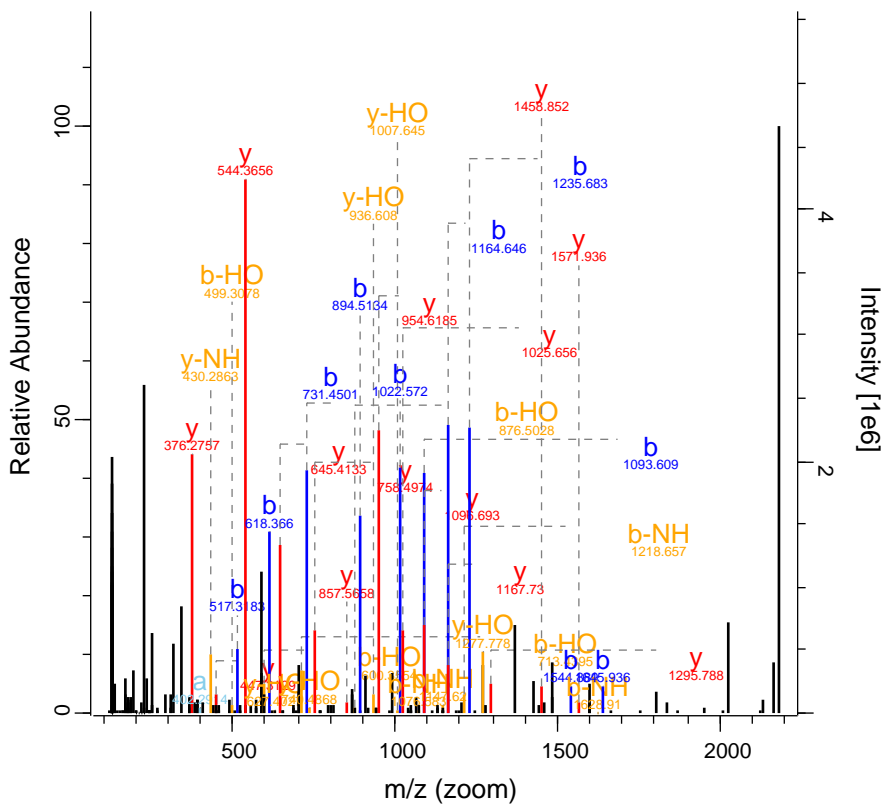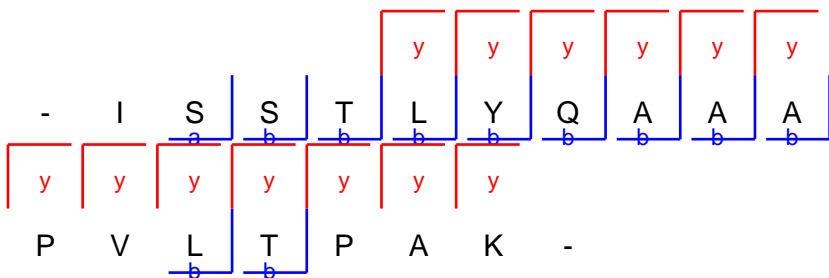

RO-QC-160121\_ZackD\_SS\_Set\_01\_Fraction 32912 FTMS; HC 63.69 548.33 KRTCAP2

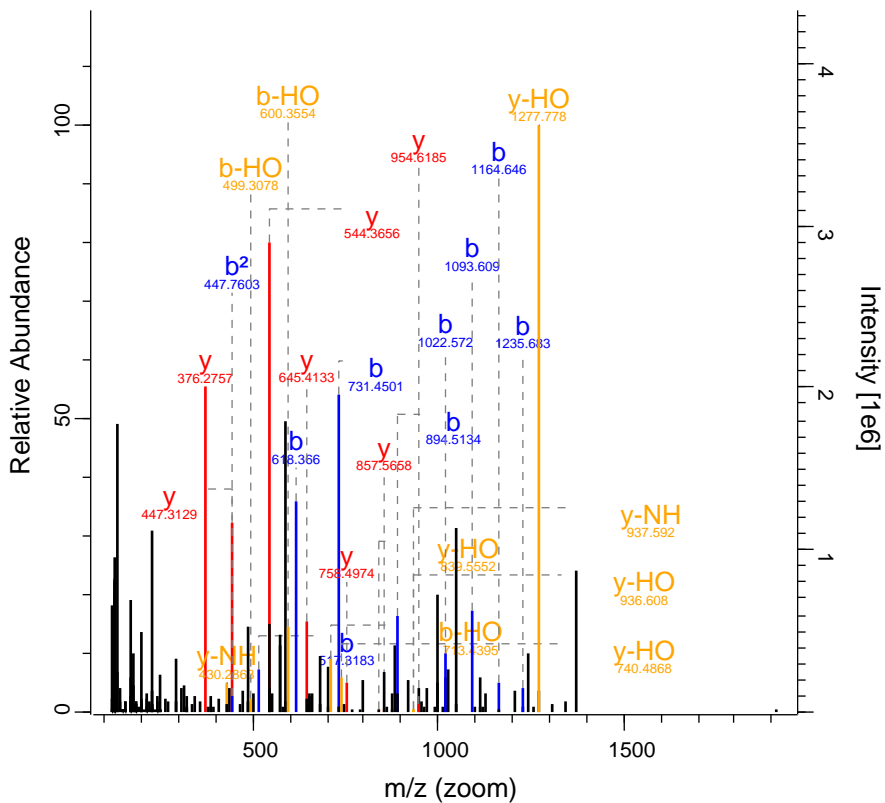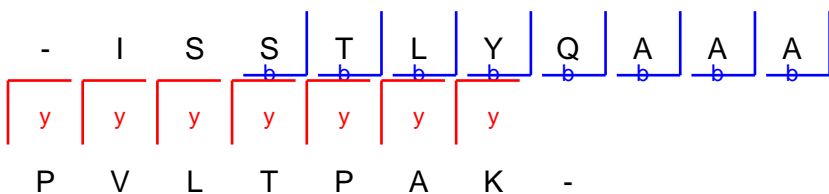

P V L T P A K -

RO-QC-160121\_ZackD\_SS\_Set\_01\_Fraction 33013 FTMS; HC 95.2 730.77 KRTCAP2

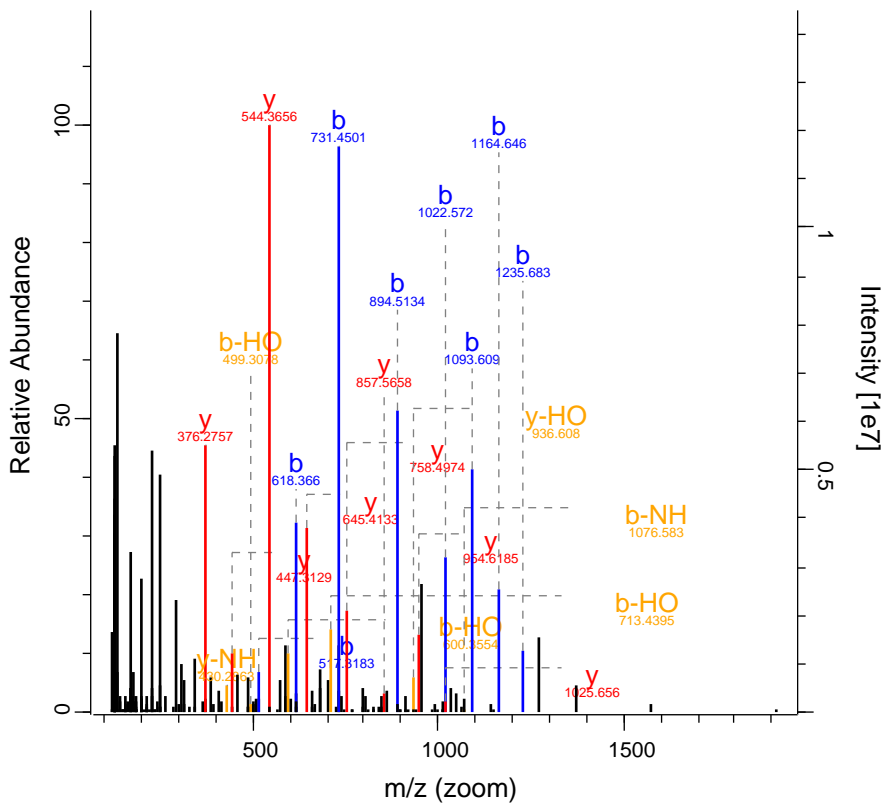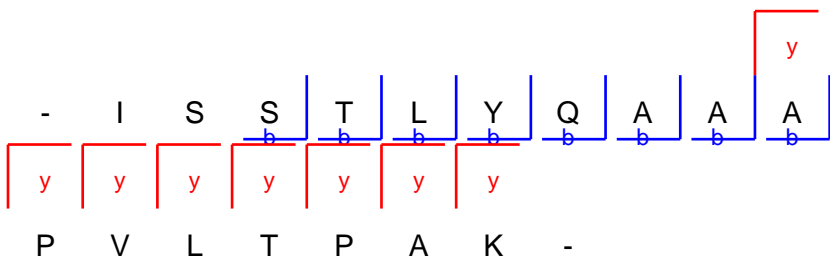



RO-QC-160121\_ZackD\_SS\_Set\_01\_Fractic 33107 FTMS; HC 236.3 1095.15 KRTCAP2

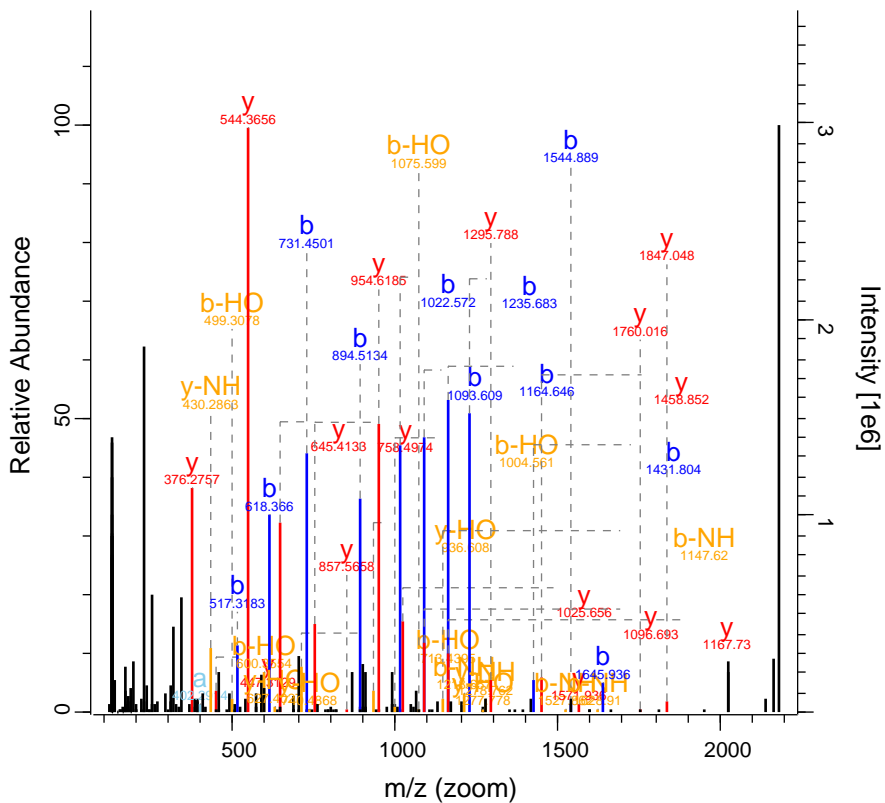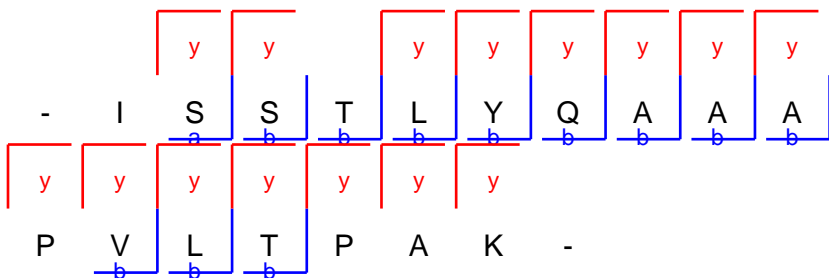

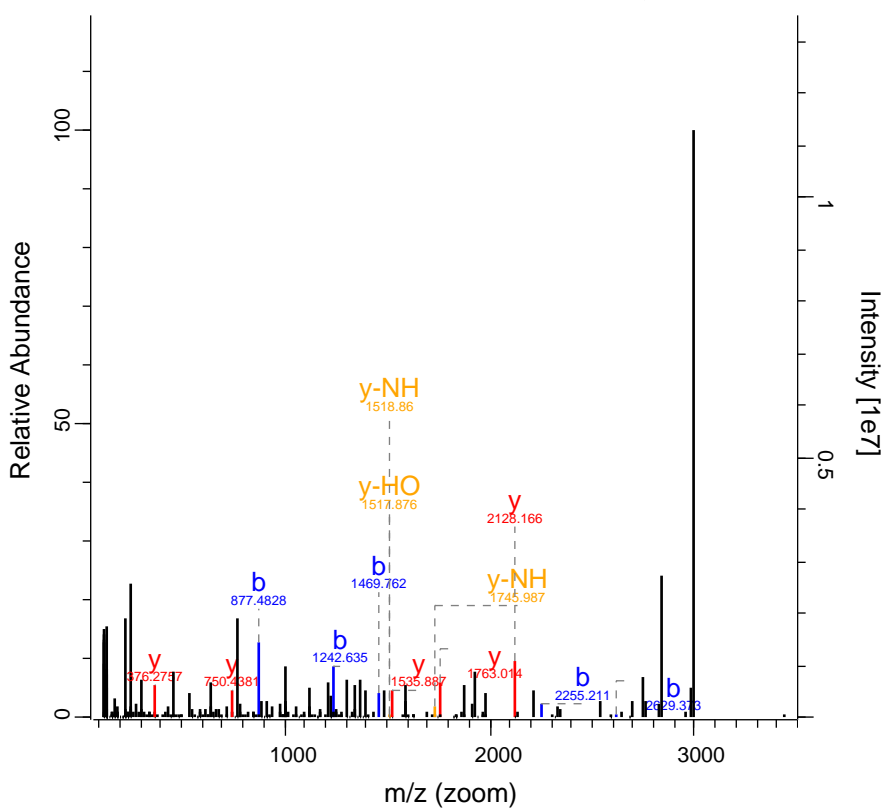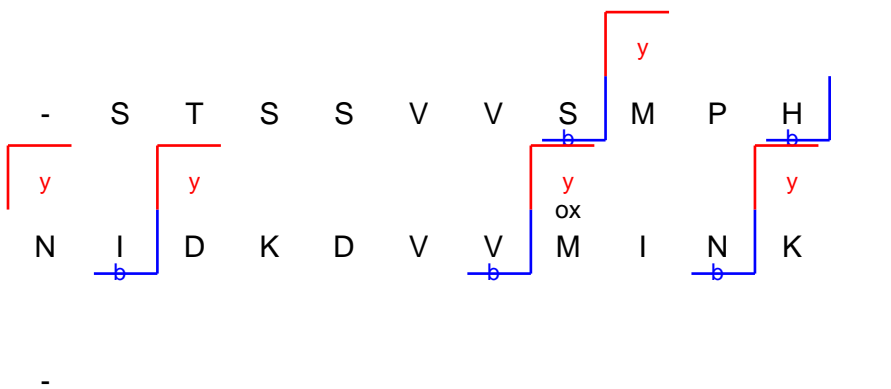

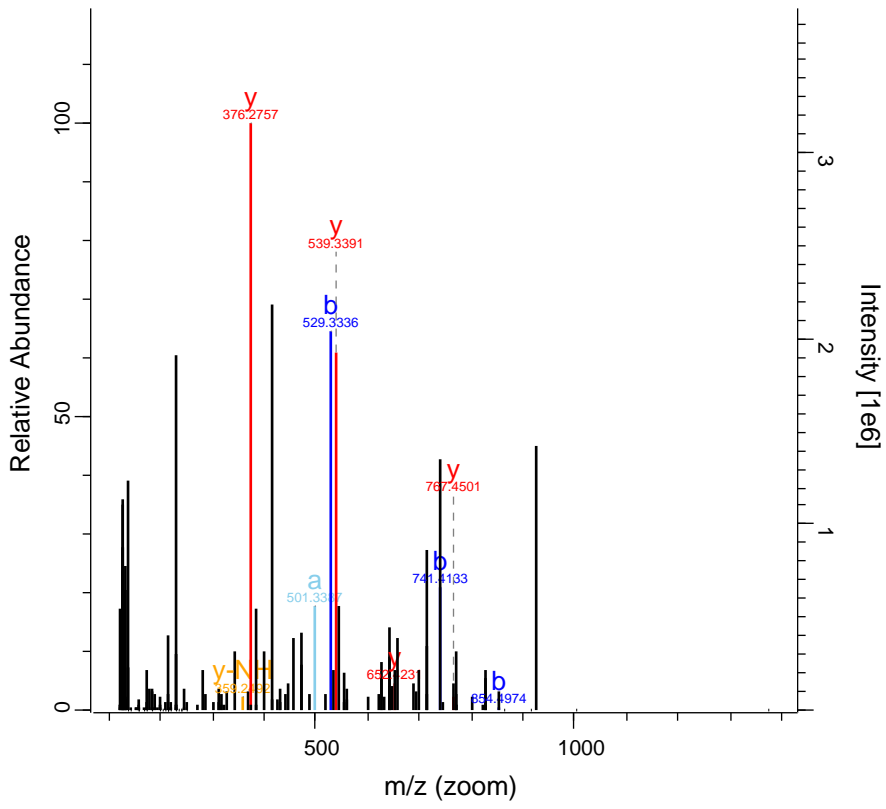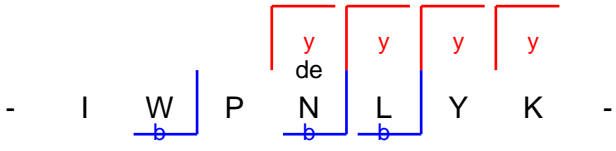

Raw File

Scan Method Score m/z

RO-QC-160121\_ZackD\_SS\_Set\_01\_Fraction\_7

34008 FTMS; HCD 99.17 464.95

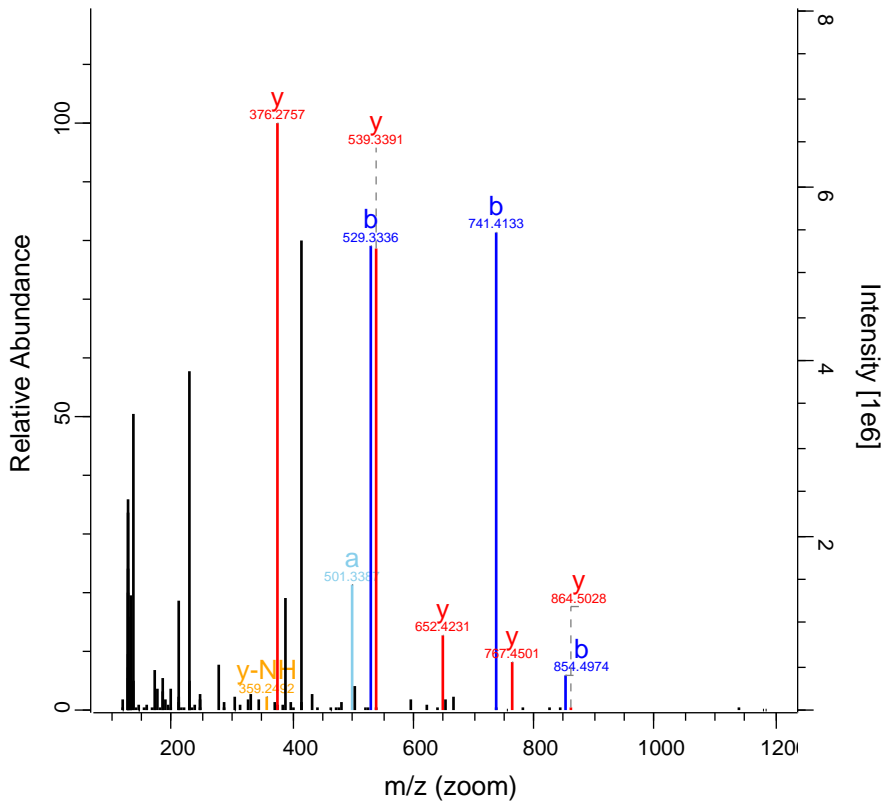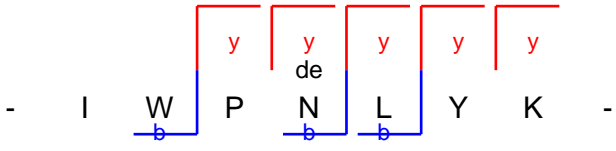

RO-QC-160121\_ZackD\_SS\_Set\_01\_Fraction 34098 FTMS; HC 74.94 552.01 KLHDC4

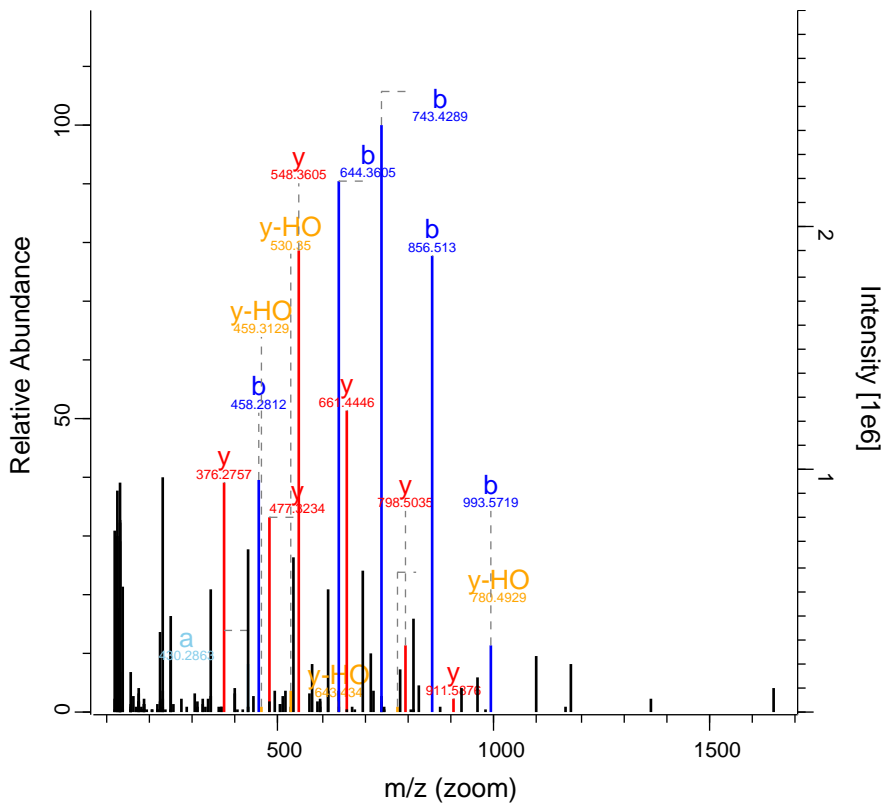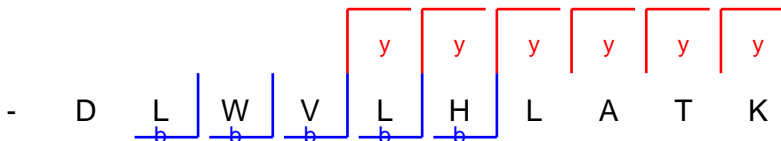

RO-QC-160121\_ZackD\_SS\_Set\_01\_Fractic 34832 FTMS; HC 50.03 1155.63 EBF2

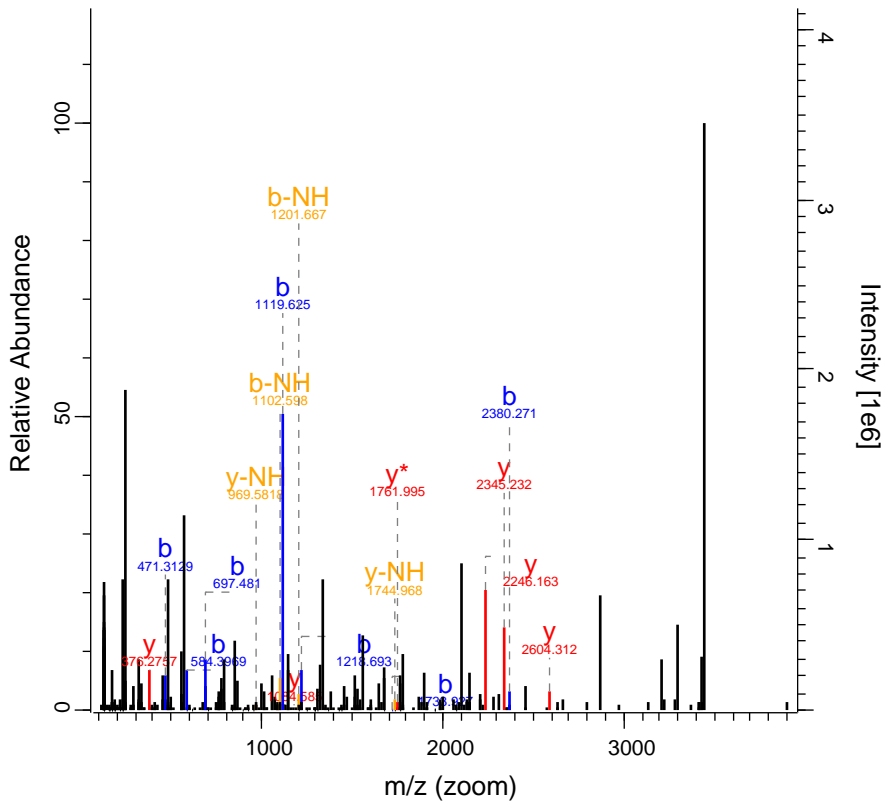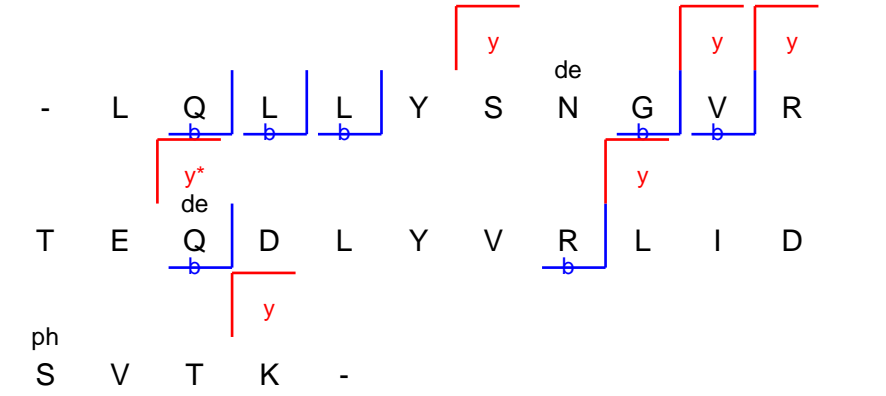

RO-QC-160121\_ZackD\_SS\_Set\_01\_Fraction 36251 FTMS; HC 87.16 901.73 PARM1

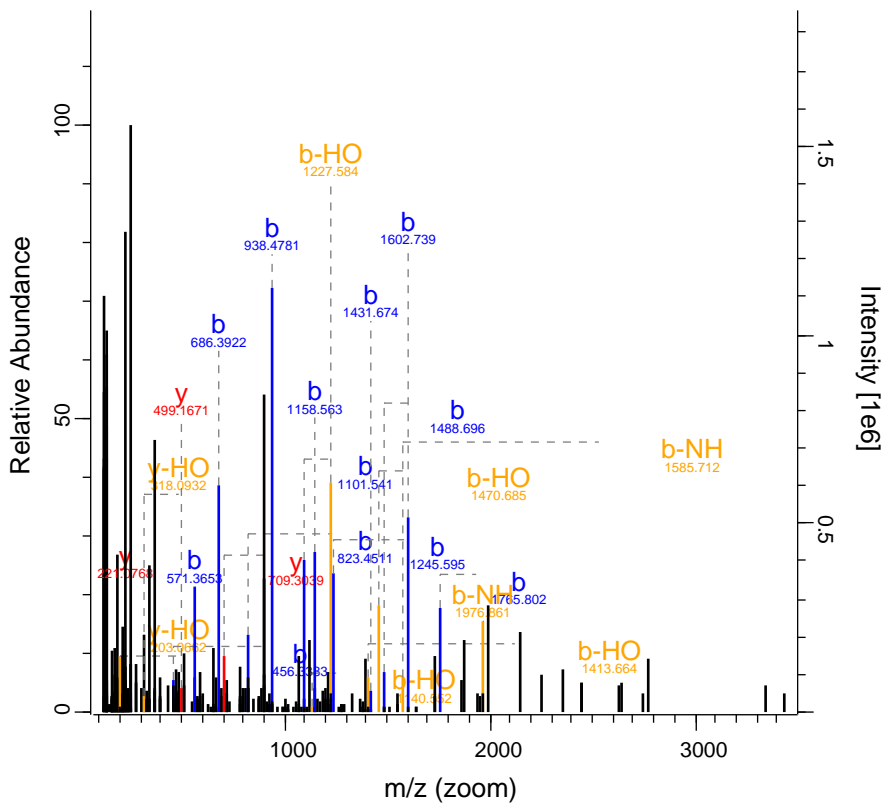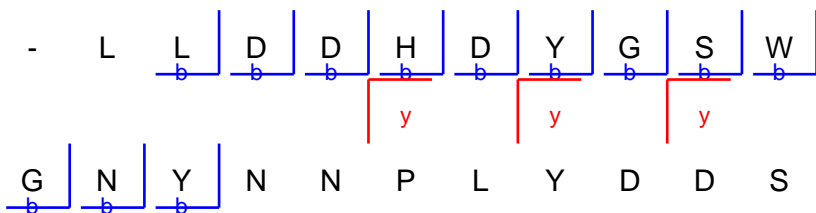

RO-QC-160121\_ZackD\_SS\_Set\_01\_Fractio 36373 FTMS; HC 104.14 496.61 GTF2A1

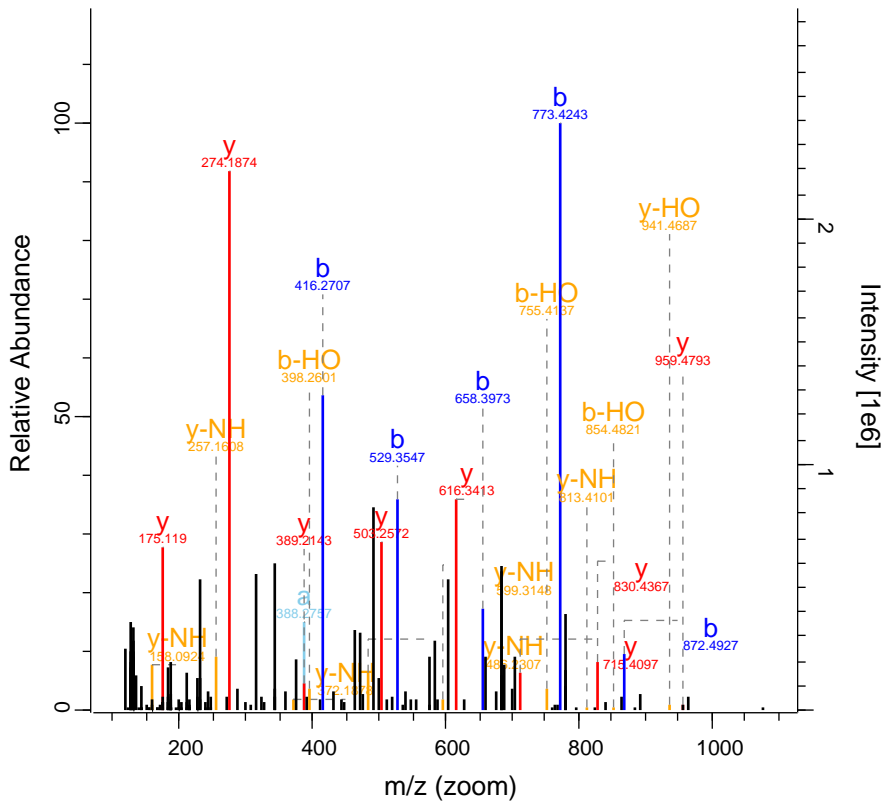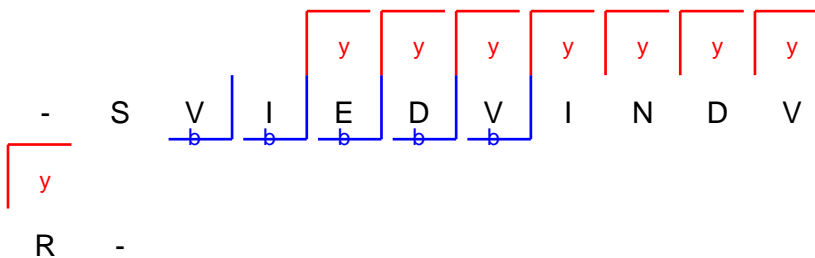



RO-QC-160121\_ZackD\_SS\_Set\_01\_Fractio 36866 FTMS; HC 180.78 874.77 KCNK1

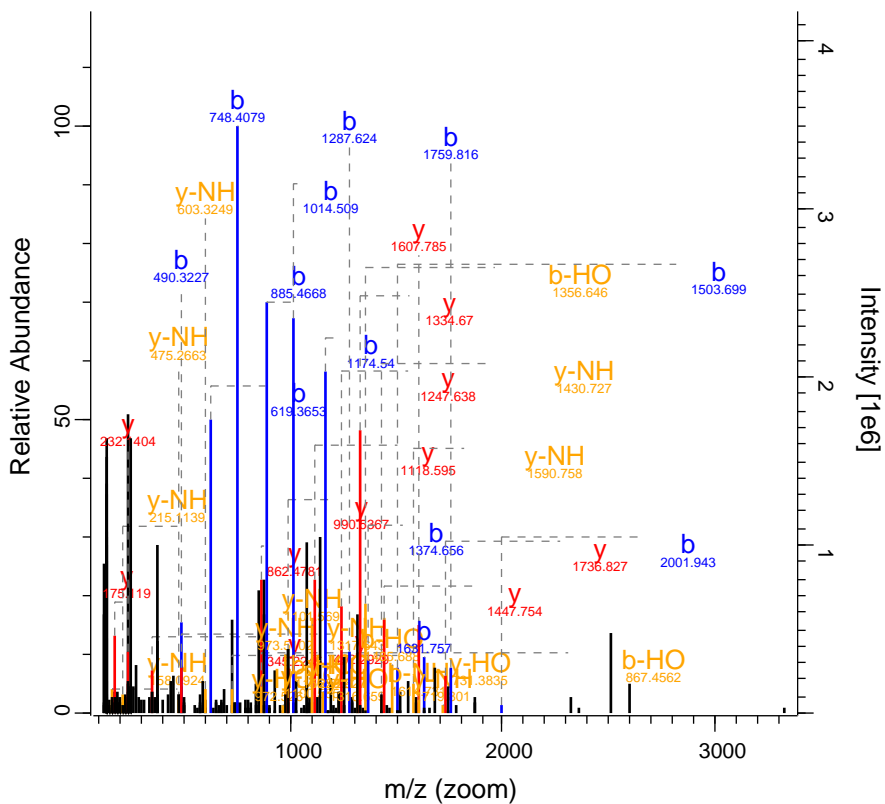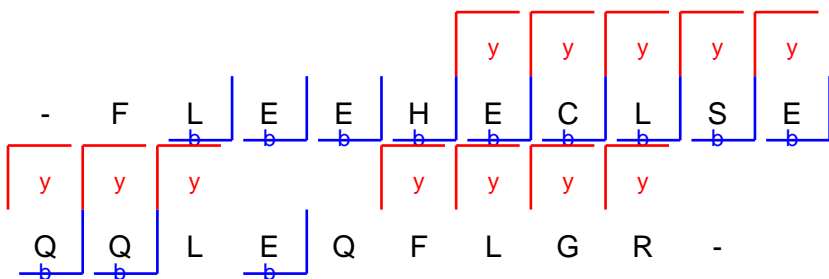



RO-QC-160121\_ZackD\_SS\_Set\_01\_Fraction37840 FTMS; HC 55.65 515.99 FBXO4

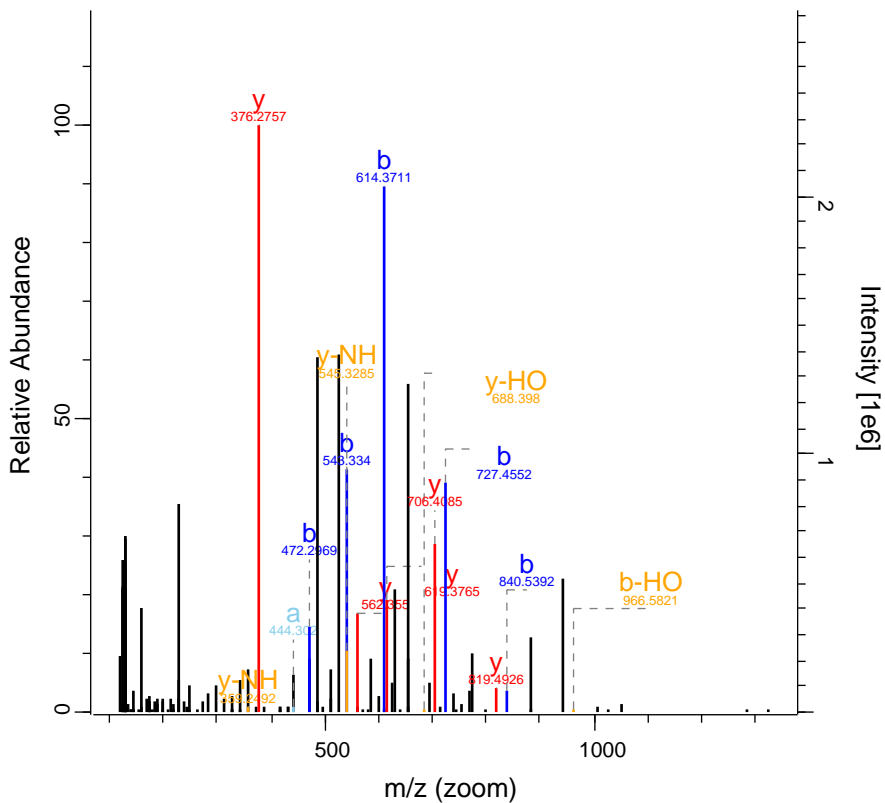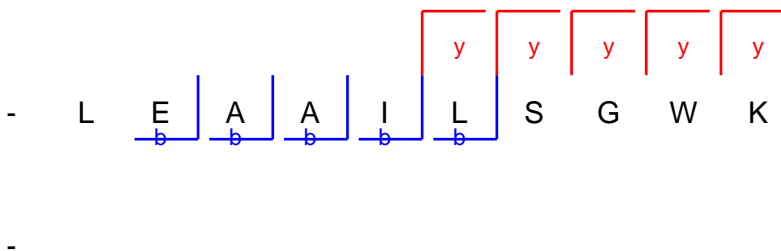

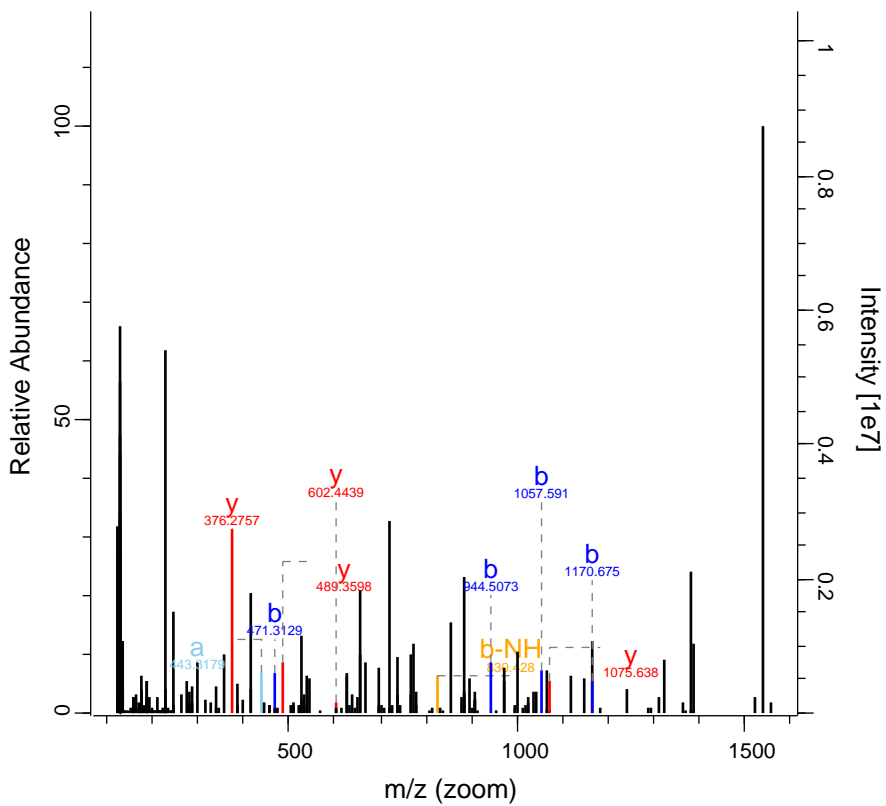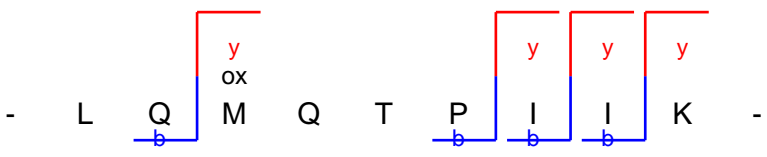

RO-QC-160121\_ZackD\_SS\_Set\_01\_Fractic 38391 FTMS; HC 144.18 1037.52 SFT2D1

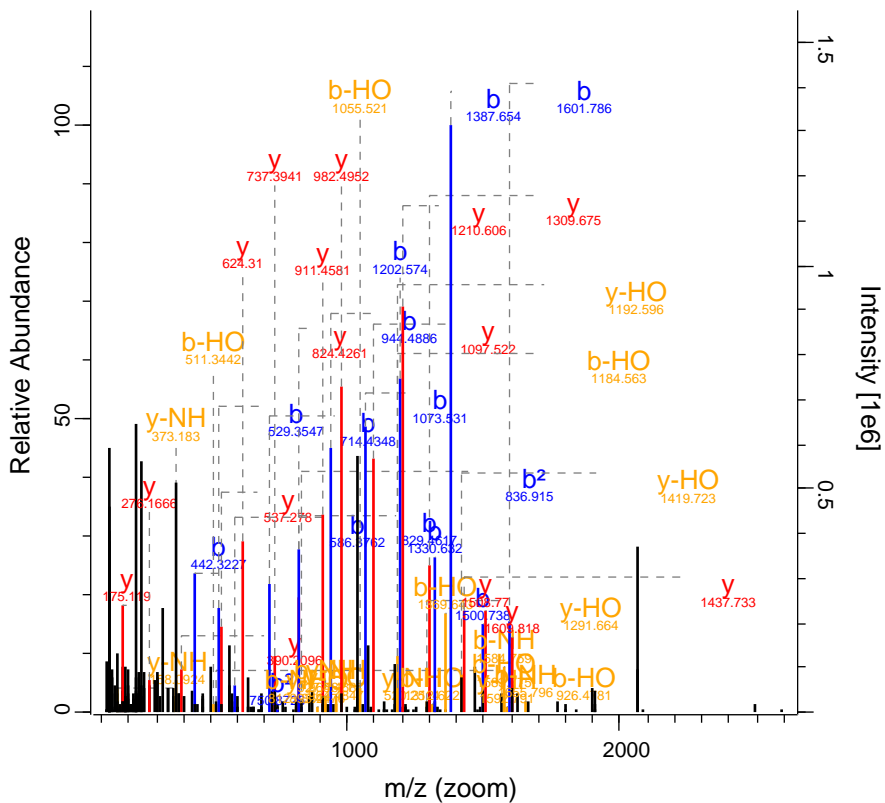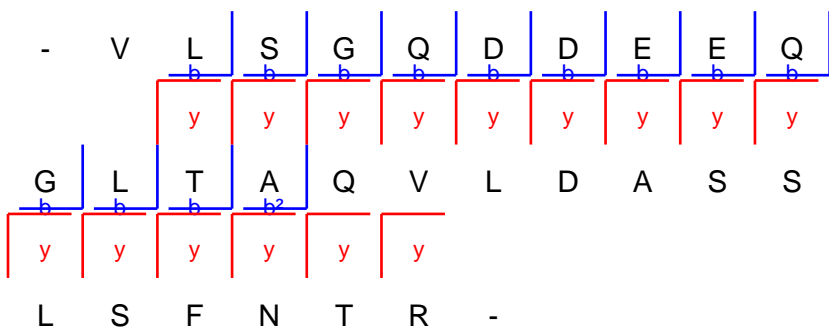

RO-QC-160121\_ZackD\_SS\_Set\_01\_Fraction\_7

38418 FTMS; HCD 51.55 776.8

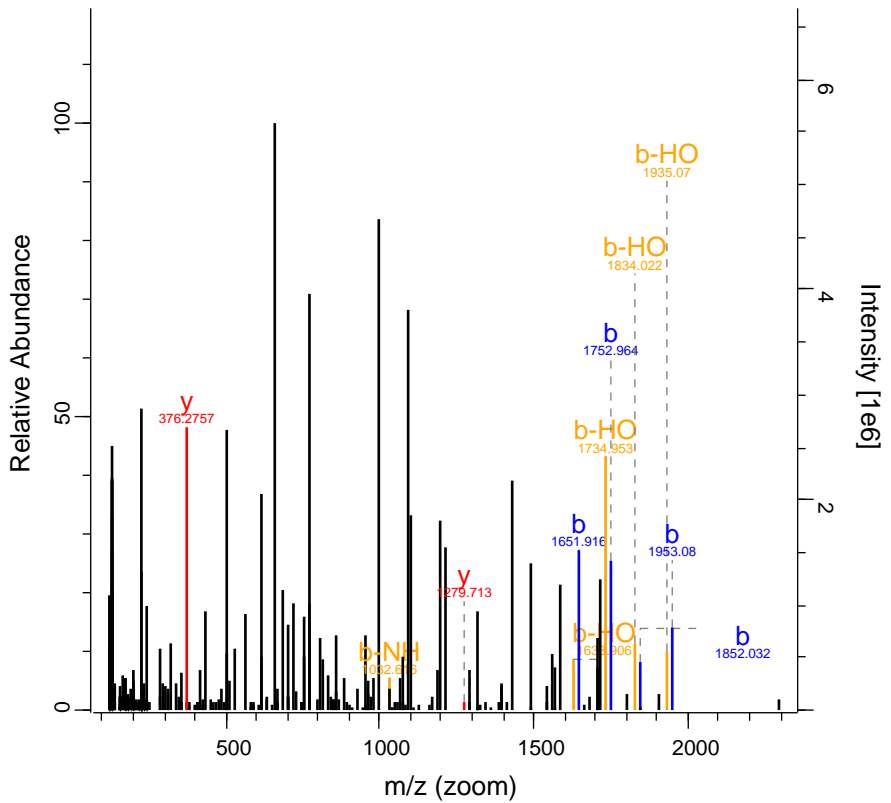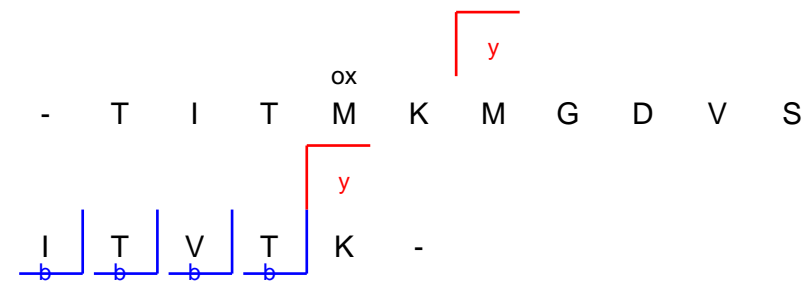

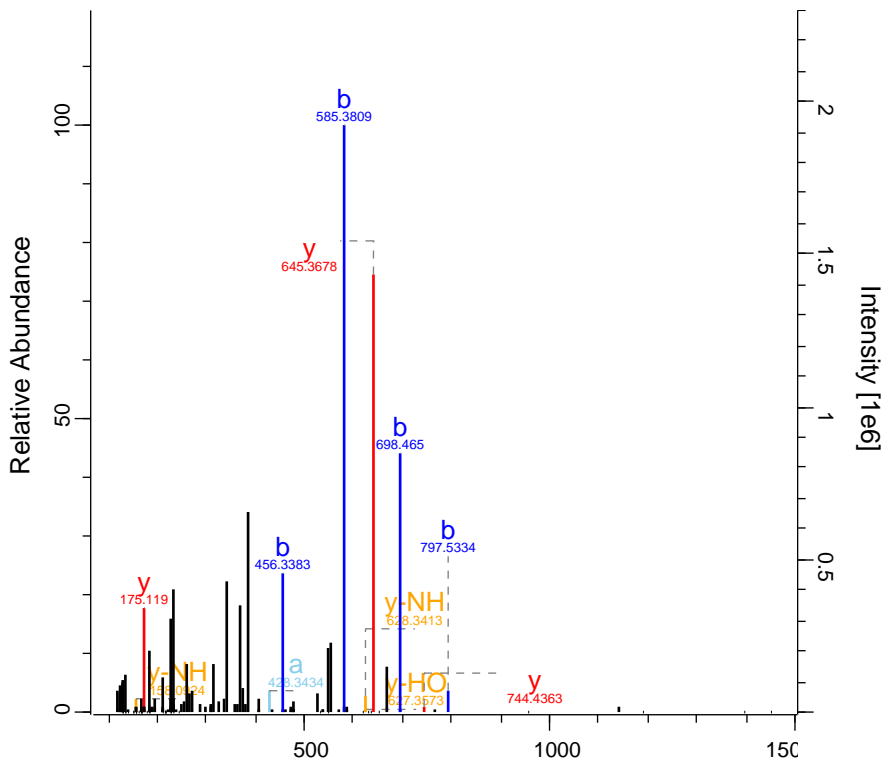

m/z (zoom)

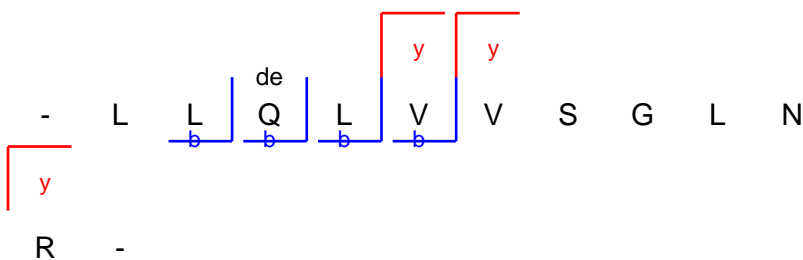





RO-QC-160121\_ZackD\_SS\_Set\_01\_Fractio 40885 FTMS; HC 106.29 630.71 UQCR11

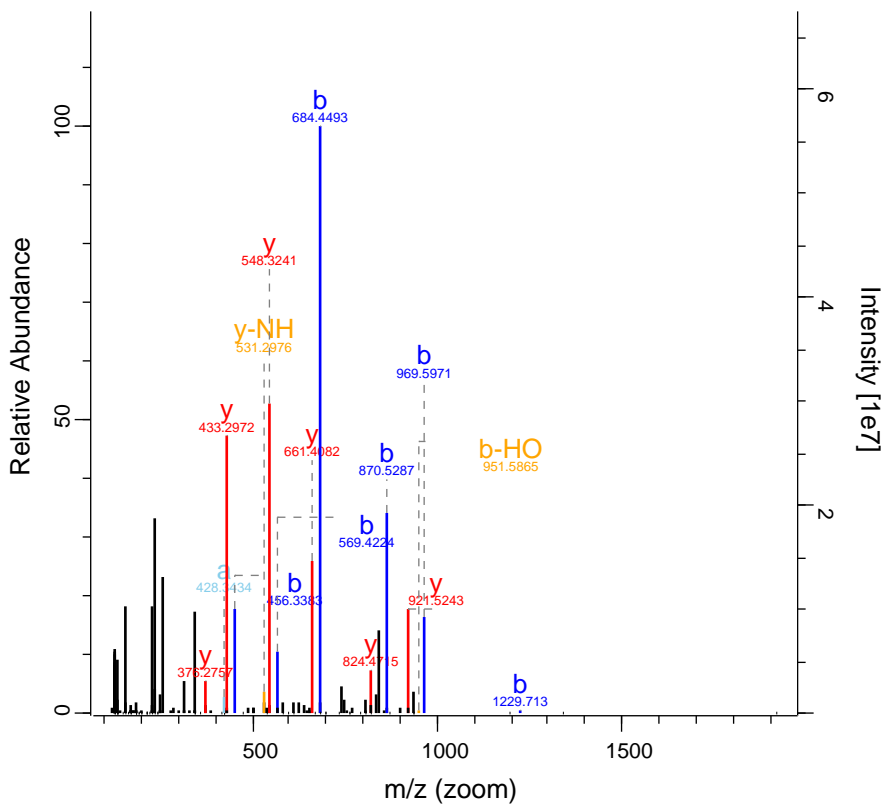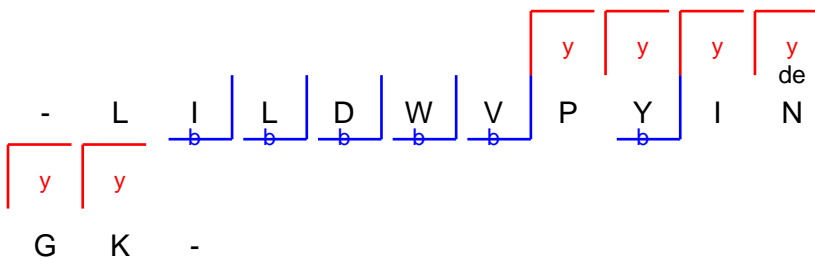

RO-QC-160121\_ZackD\_SS\_Set\_01\_Fraction 41823 FTMS; HCl 83.61 643.9 STRA13

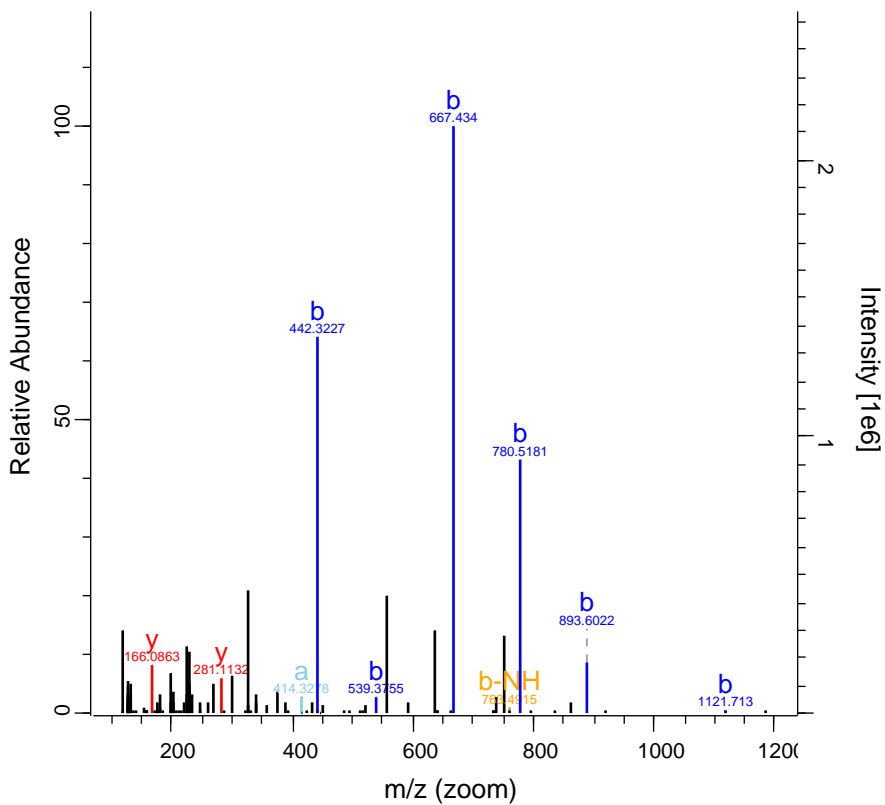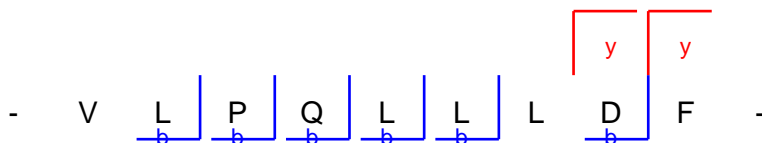

RO-QC-160121\_ZackD\_SS\_Set\_01\_Fraction 5948 FTMS; HC 108.43 752.92 CDK10

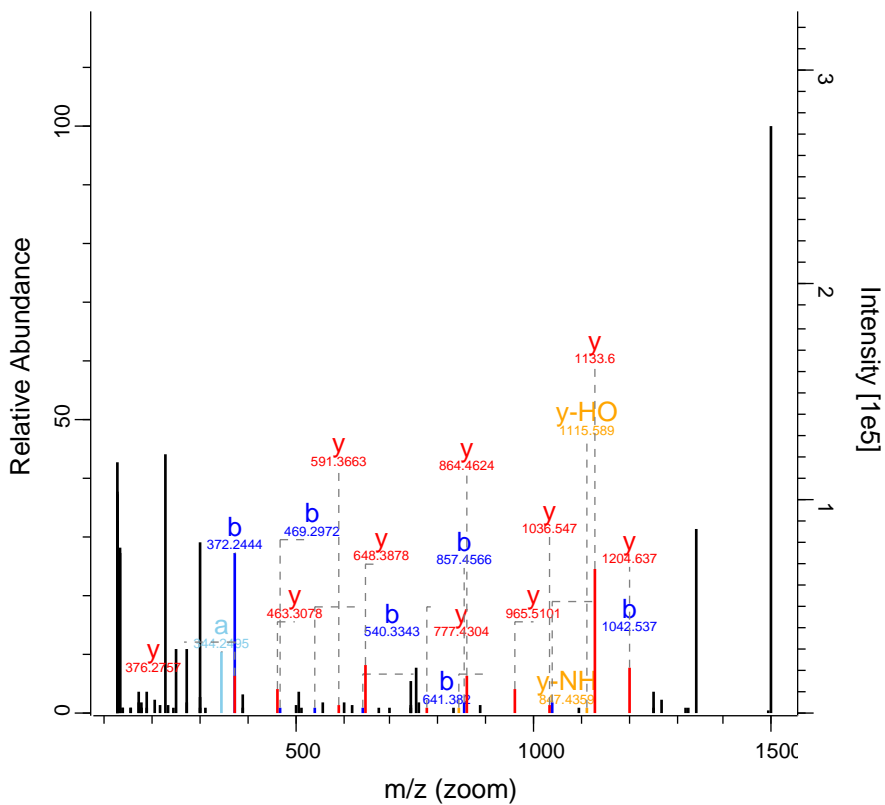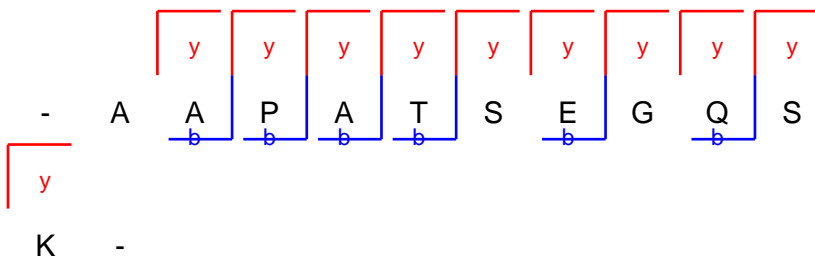

RO-QC-160121\_ZackD\_SS\_Set\_01\_Fraction 6069 FTMS; HCl 71.98 579.64 TATDN2

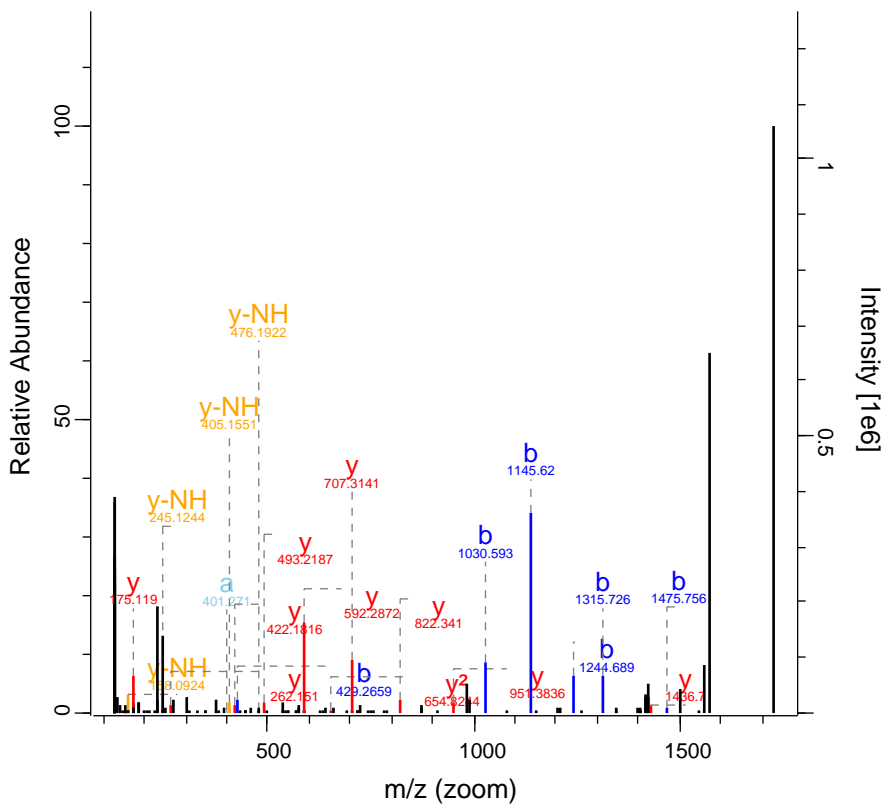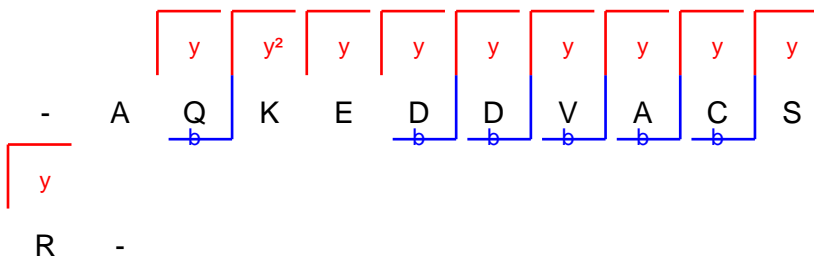

RO-QC-160121\_ZackD\_SS\_Set\_01\_Fraction 6216 FTMS; HC 182.28 767.06 EPC1

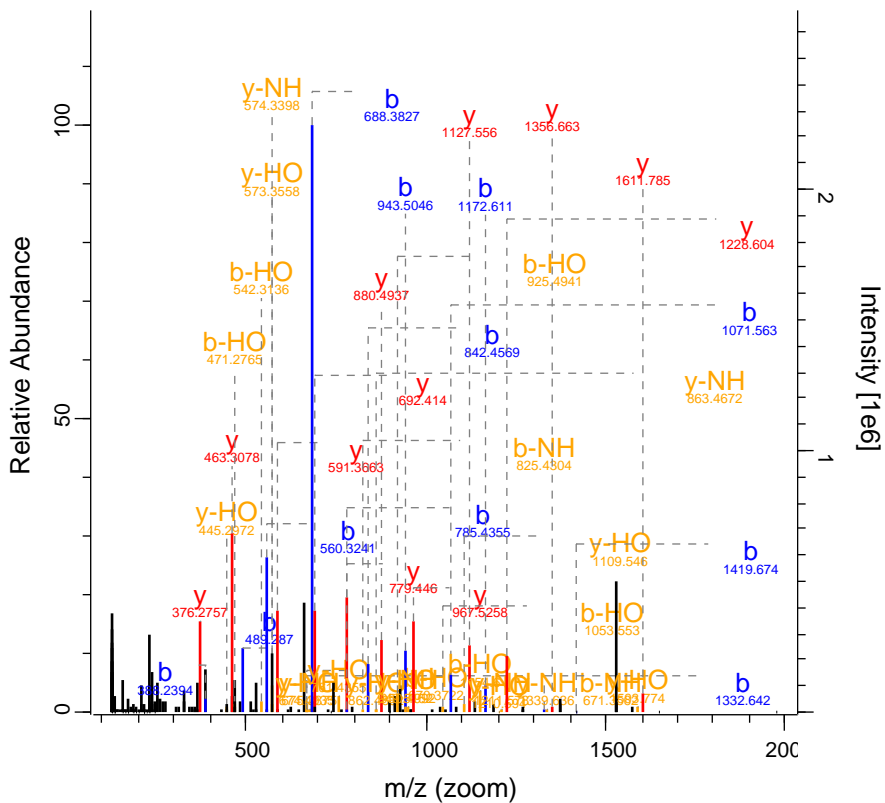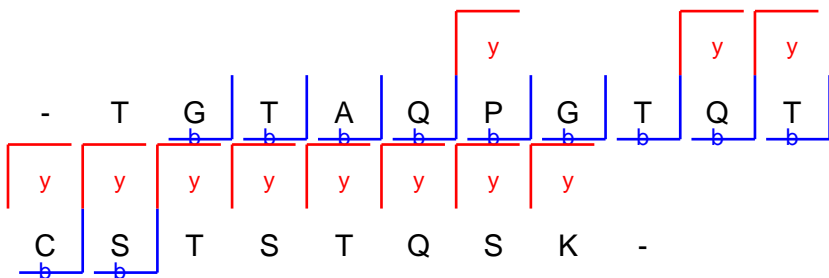

RO-QC-160121\_ZackD\_SS\_Set\_01\_Fraction 6241 FTMS; HCl 50.35 622.32 PECAM1

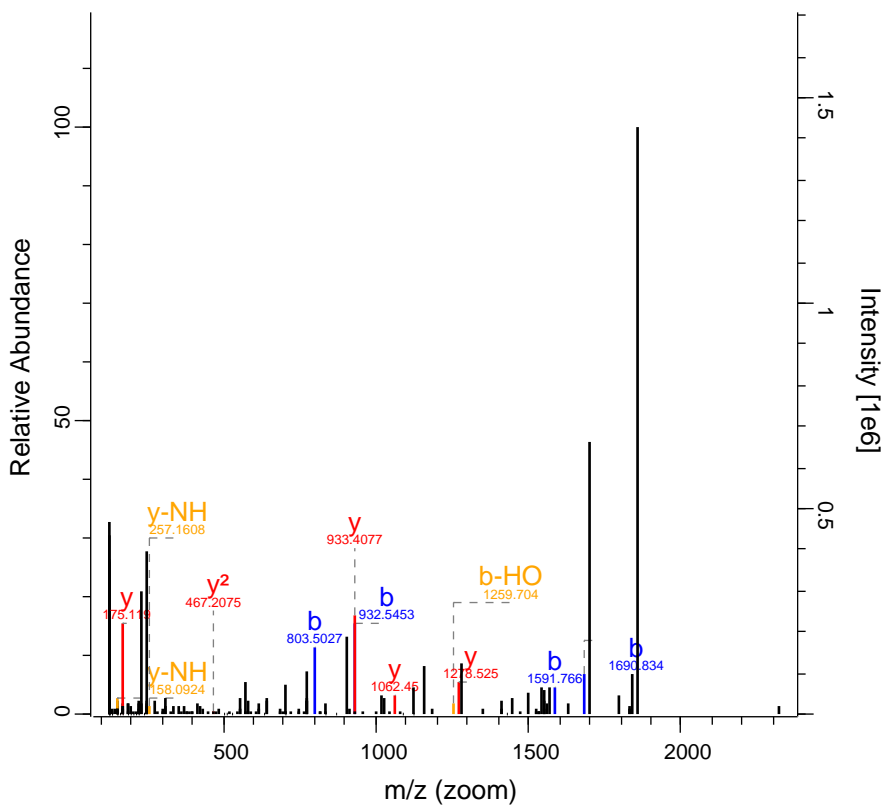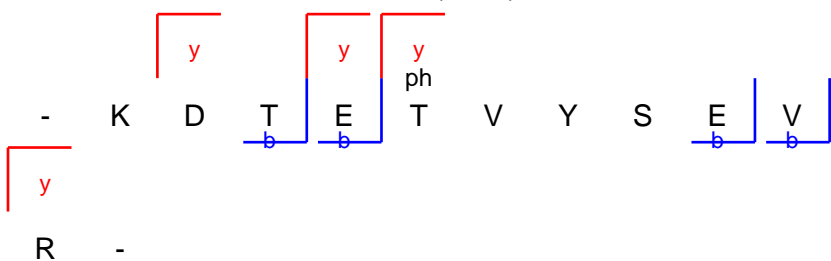

RO-QC-160121\_ZackD\_SS\_Set\_01\_Fraction 6389 FTMS; HCl 55.45 598.34 USP31

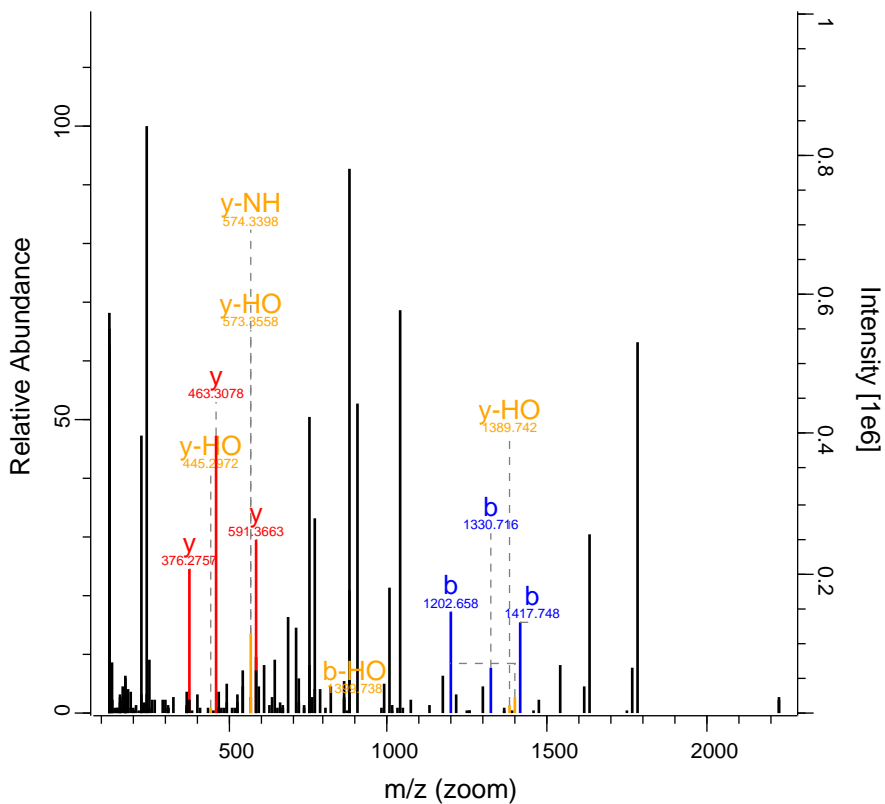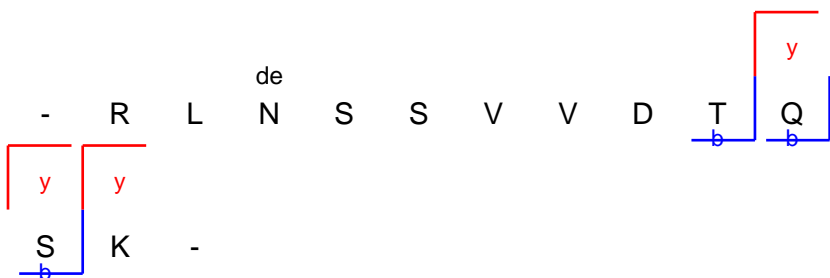





RO-QC-160121\_ZackD\_SS\_Set\_01\_Fraction 6902 FTMS; HC 128.61 721.86 TMEFF1

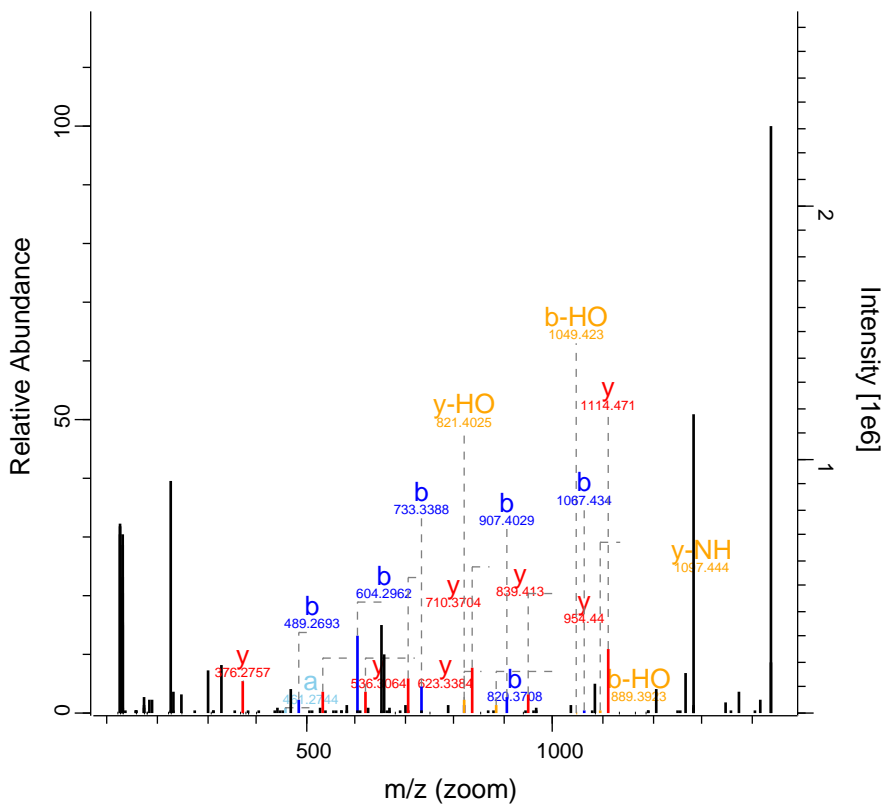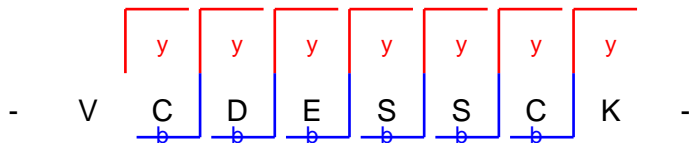

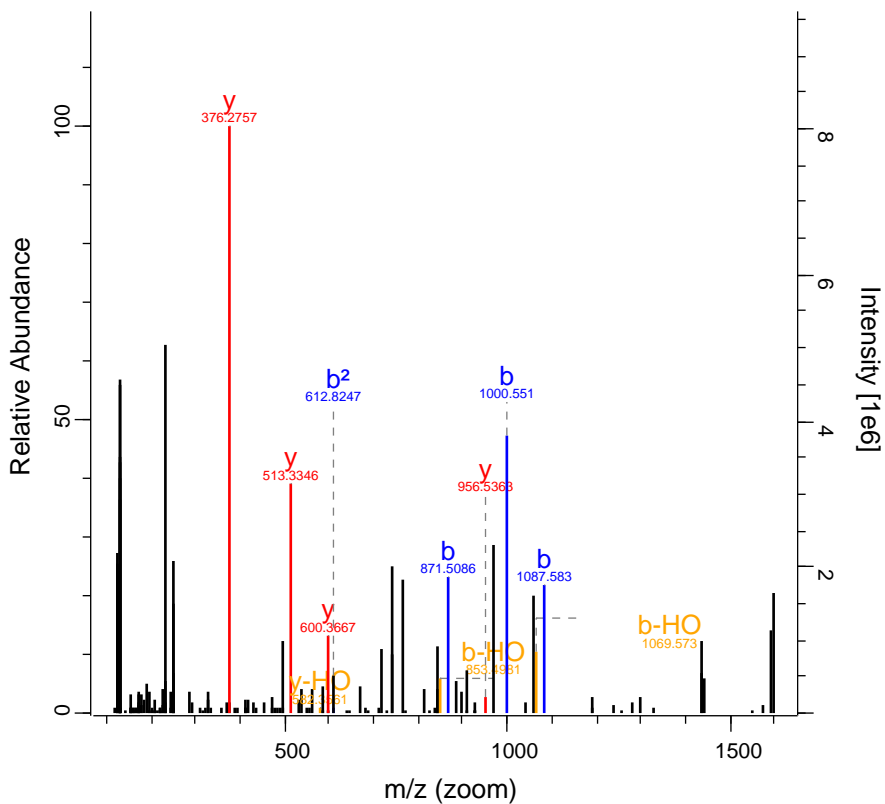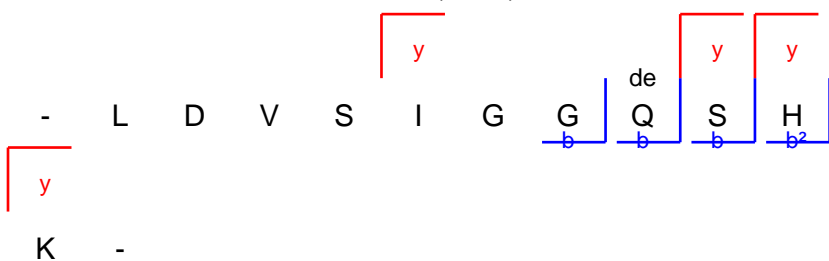



RO-QC-160121\_ZackD\_SS\_Set\_01\_Fraction 7335 FTMS; HCl 65.06 843.51 GLOD5

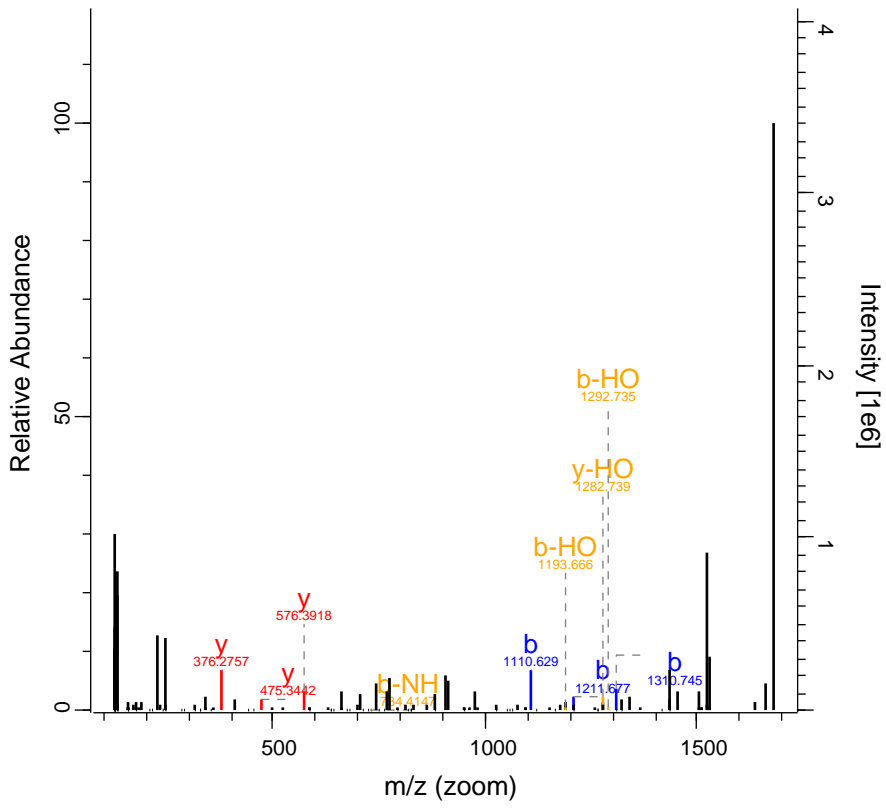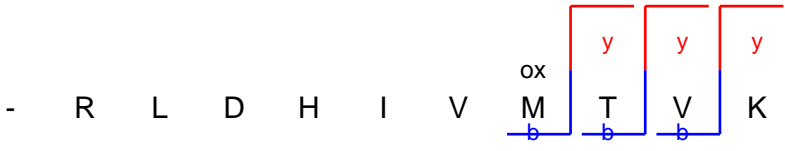

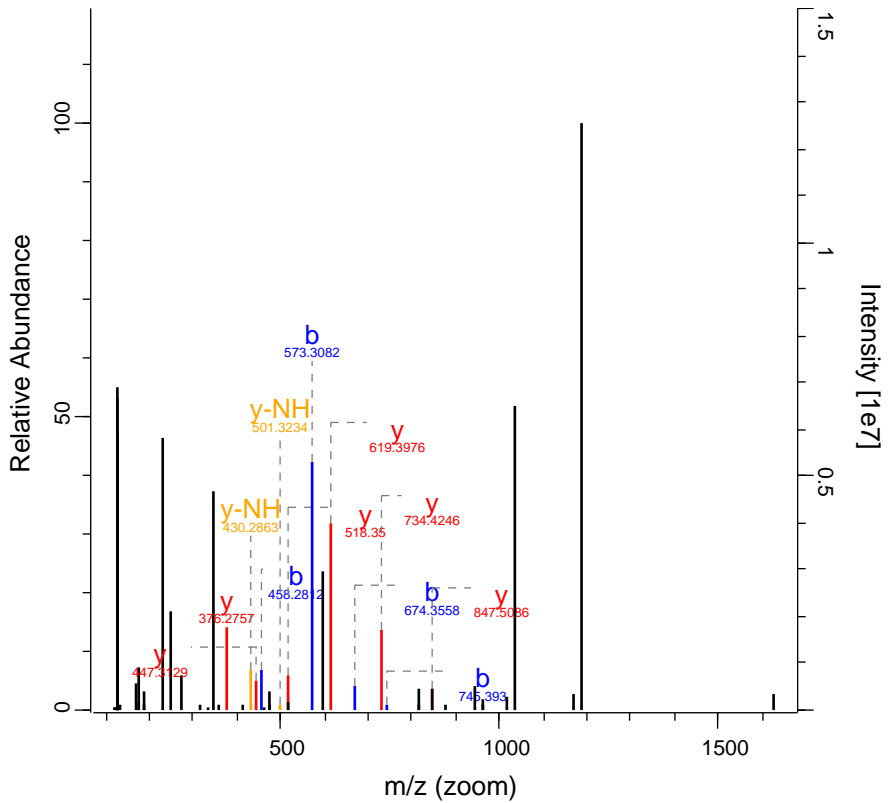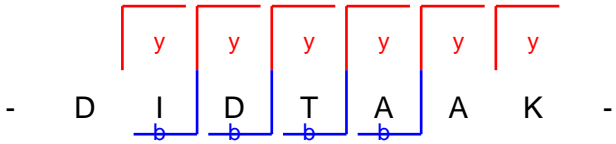

RO-QC-160121\_ZackD\_SS\_Set\_01\_Fraction 9167 FTMS; HCl 223.08 779.9 SLC39A1

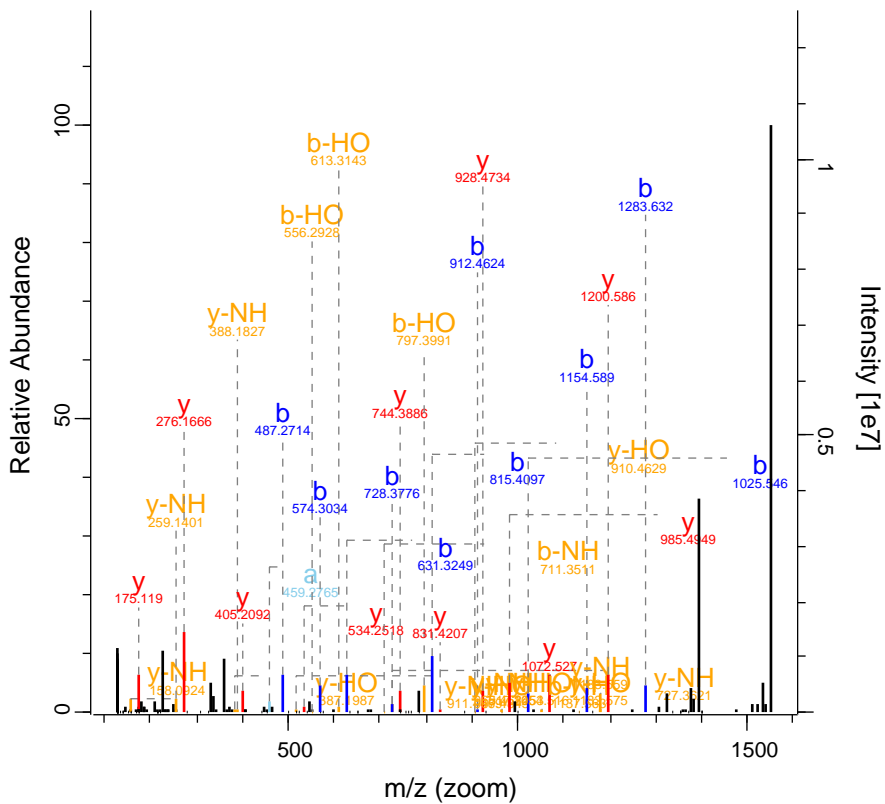

RO-QC-160121\_ZackD\_SS\_Set\_01\_Fraction 9311 FTMS; HCl 69.95 663.38 RBM20

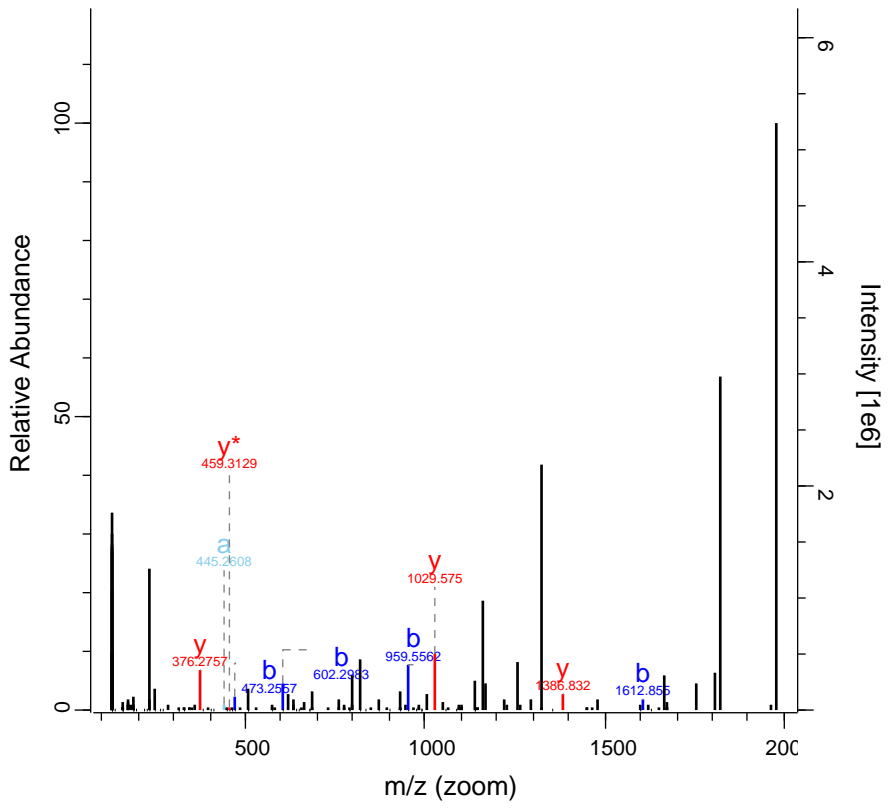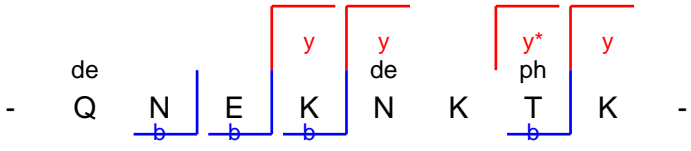

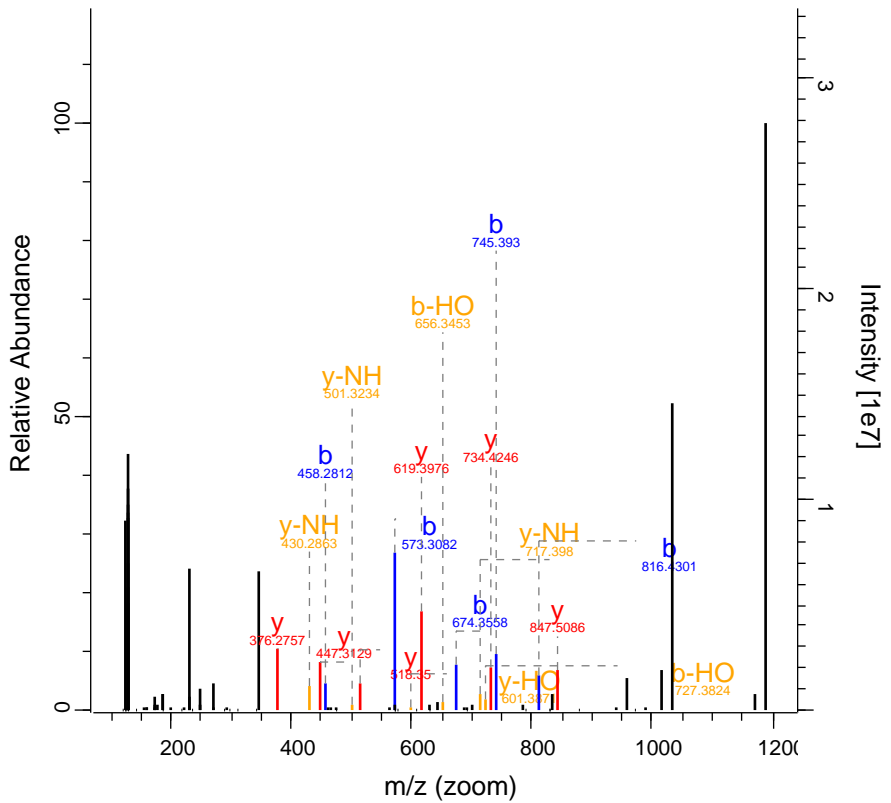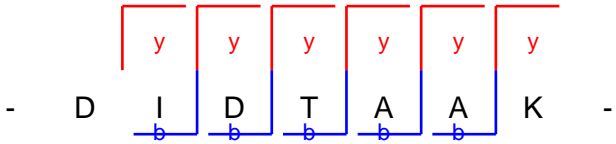



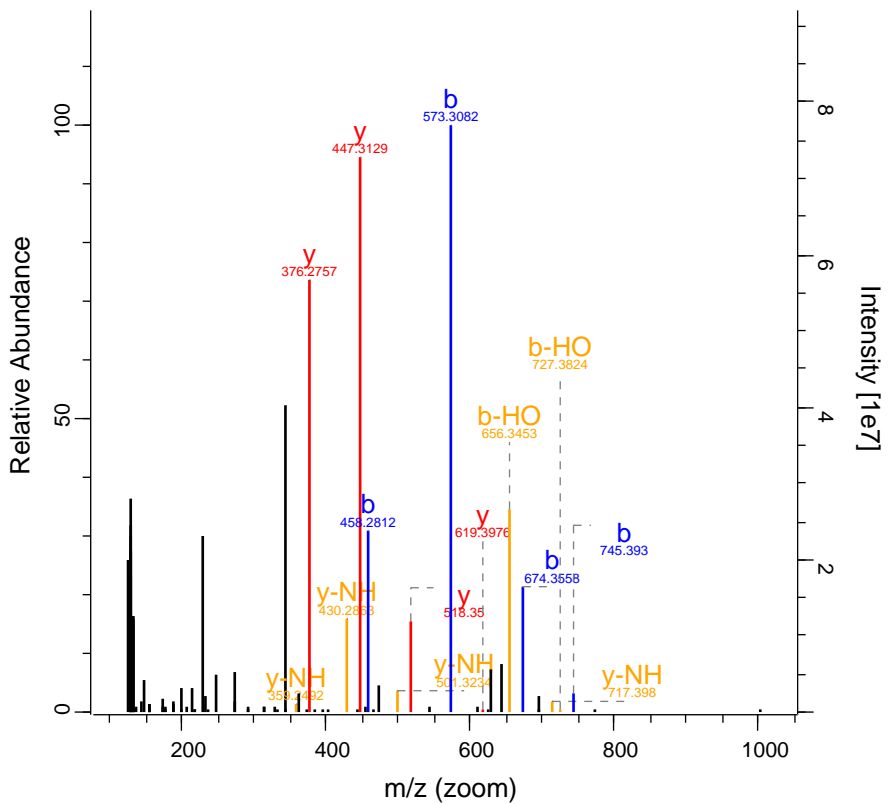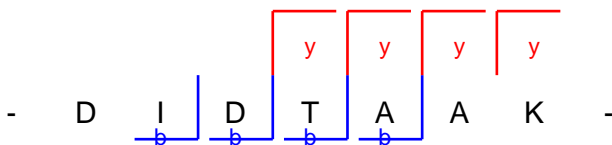

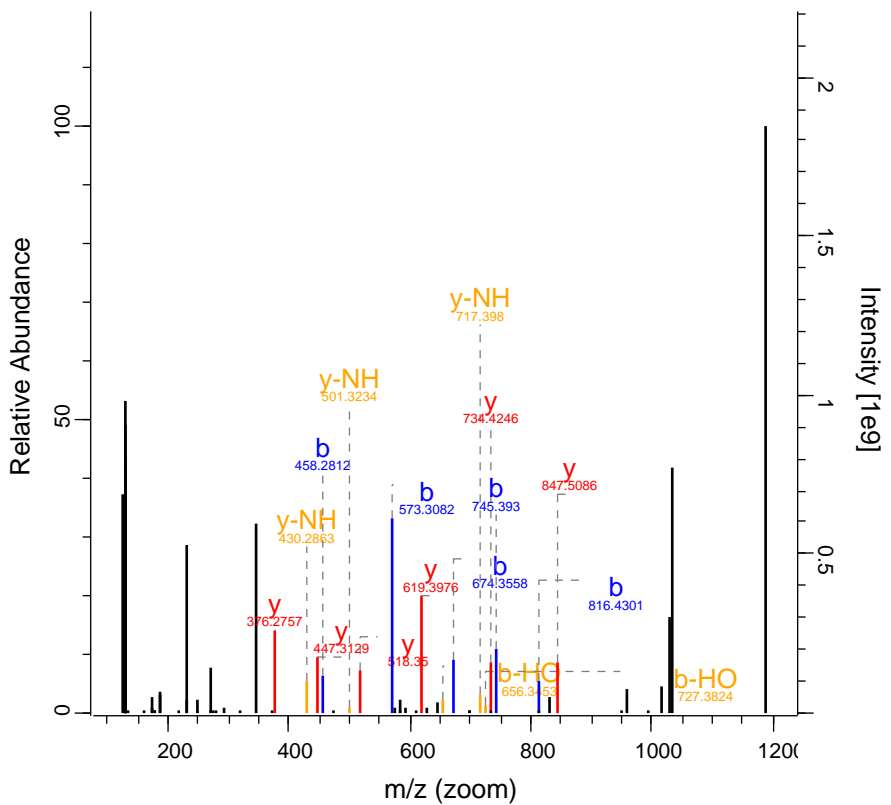

RO-QC-160121\_ZackD\_SS\_Set\_01\_Fraction\_8

11024 FTMS; HCD 92.44 688.4

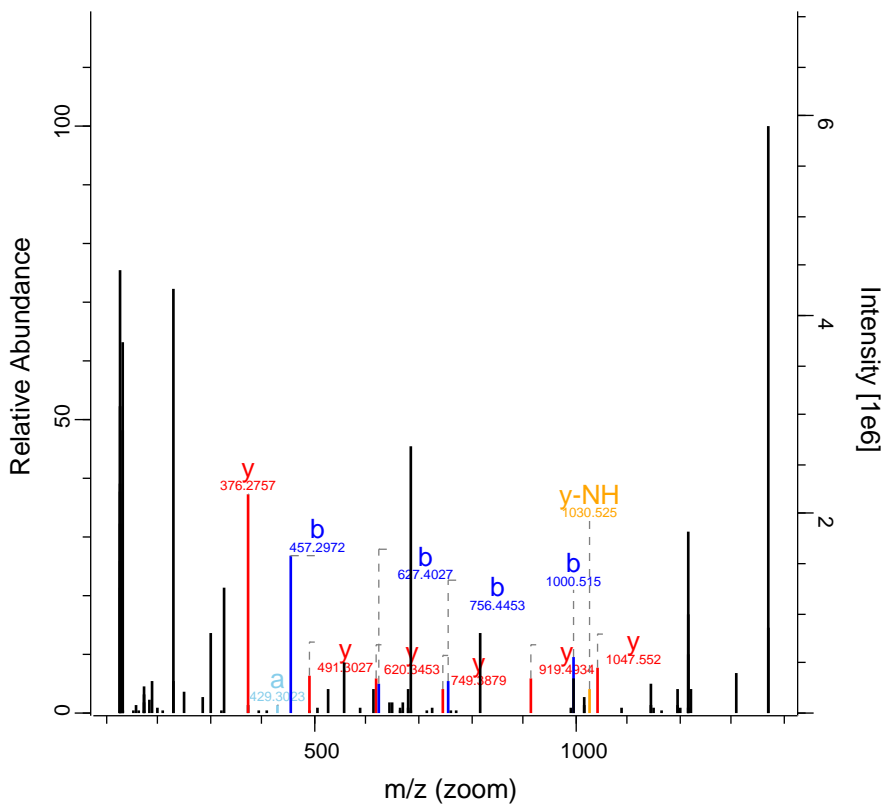

m/z (zoom)

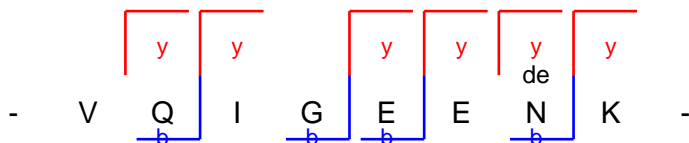

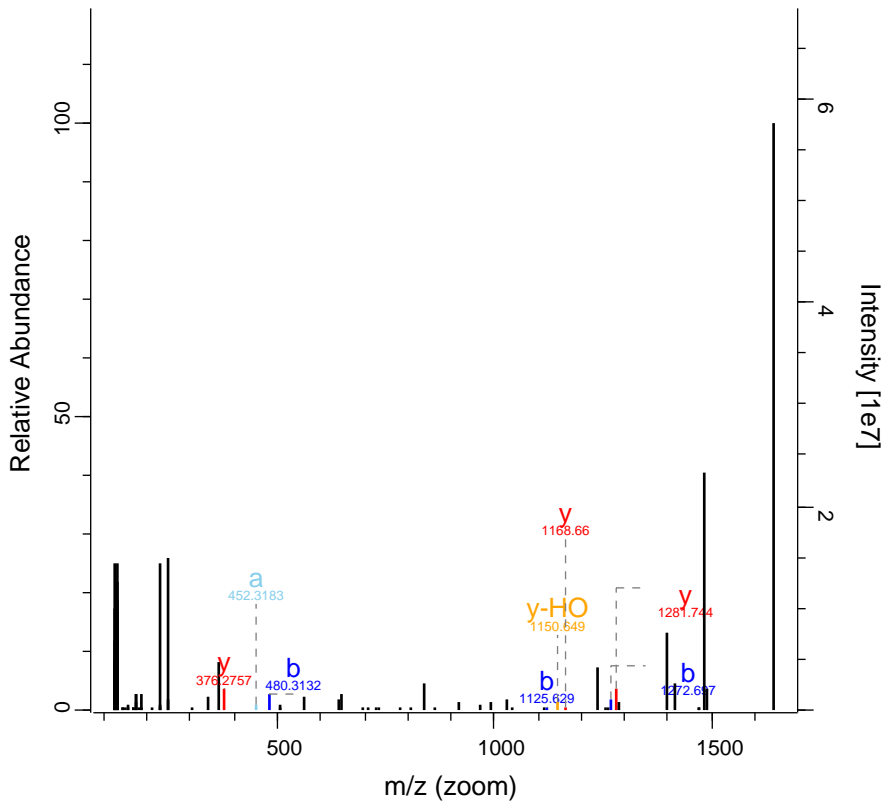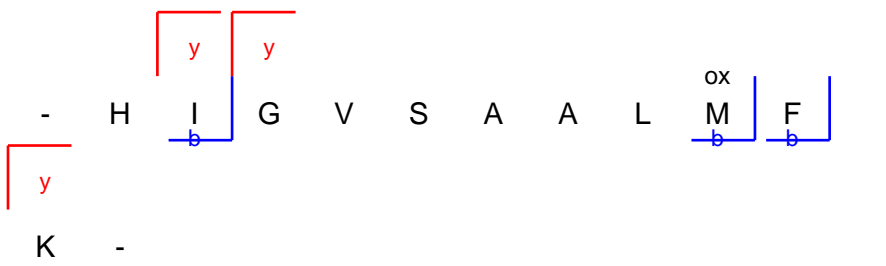

| Raw File                                | Scan  | Method    | Score | m/z    |
|-----------------------------------------|-------|-----------|-------|--------|
| RO-QC-160121_ZackD_SS_Set_01_Fraction_8 | 11592 | FTMS; HCD | 42.6  | 835.41 |

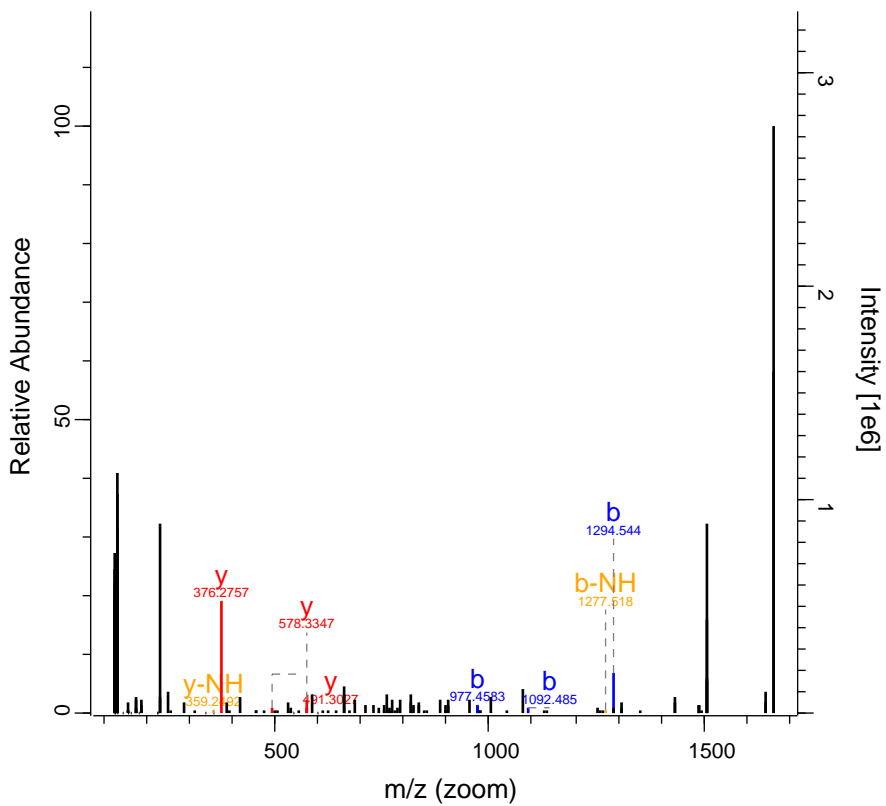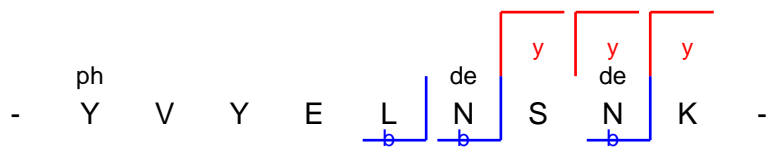

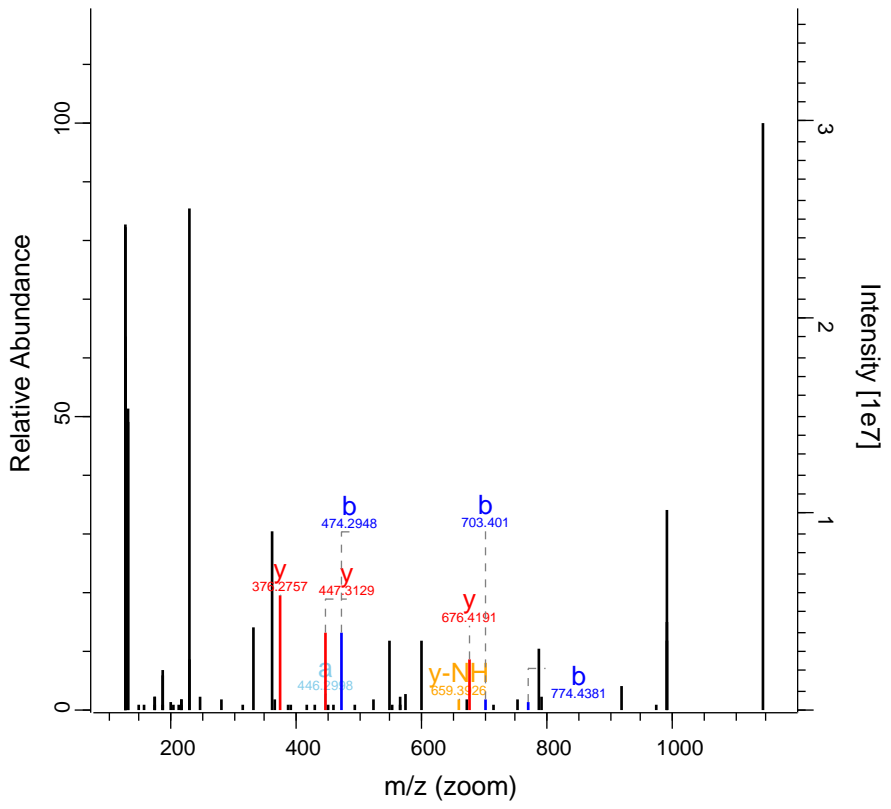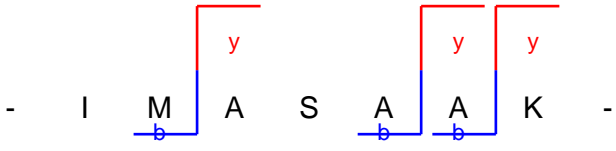



RO-QC-160121\_ZackD\_SS\_Set\_01\_Fraction 12989 FTMS; HC 94.85 767.93 ZNF251

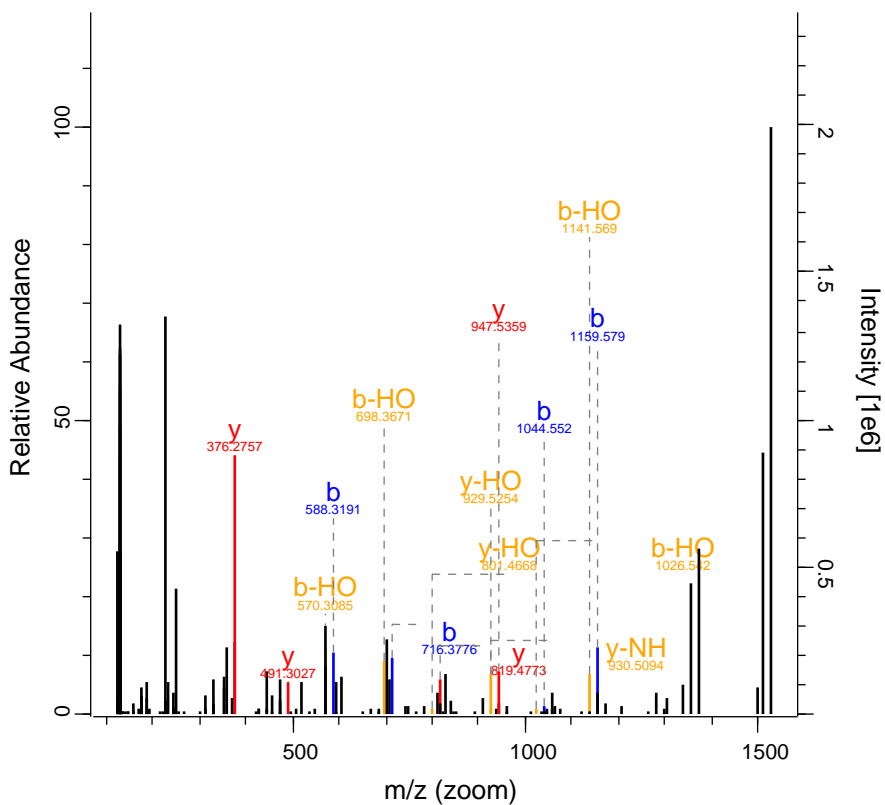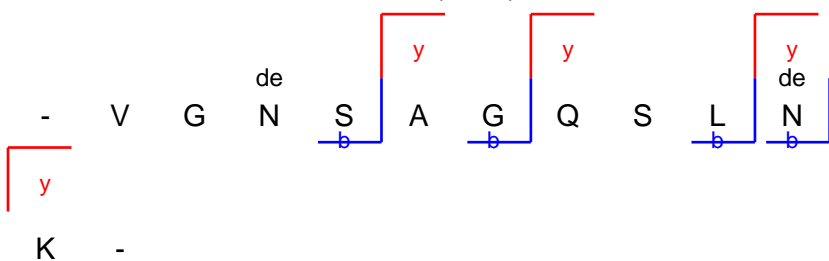



RO-QC-160121\_ZackD\_SS\_Set\_01\_Fraction 13919 FTMS; HC 70.92 854.46 CARD14

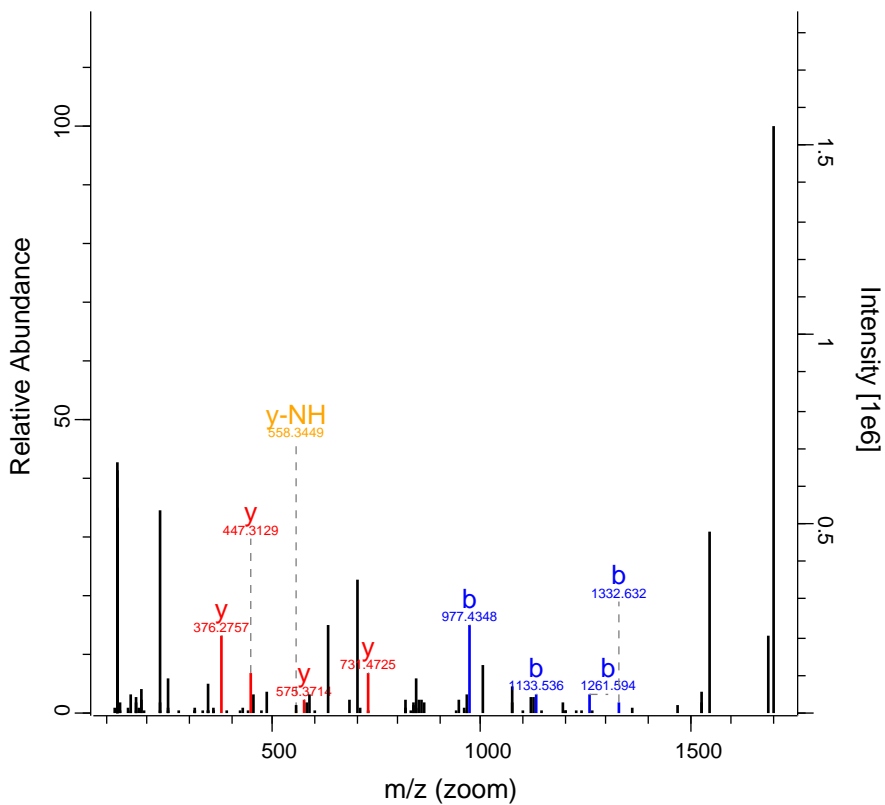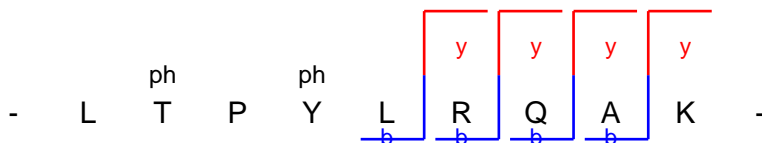

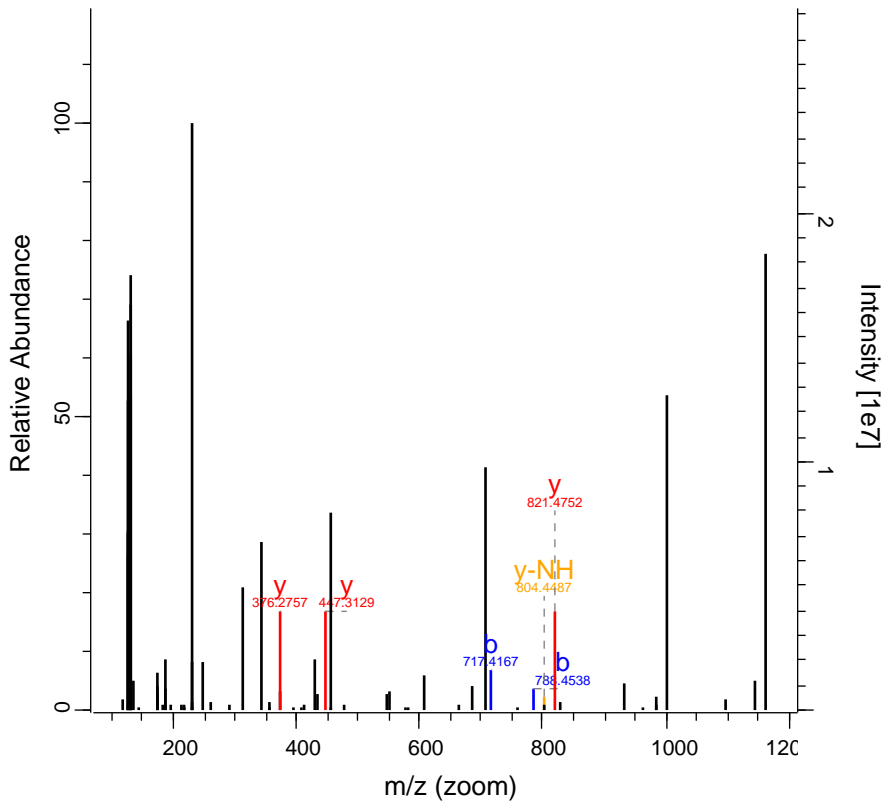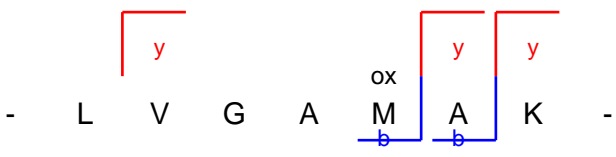

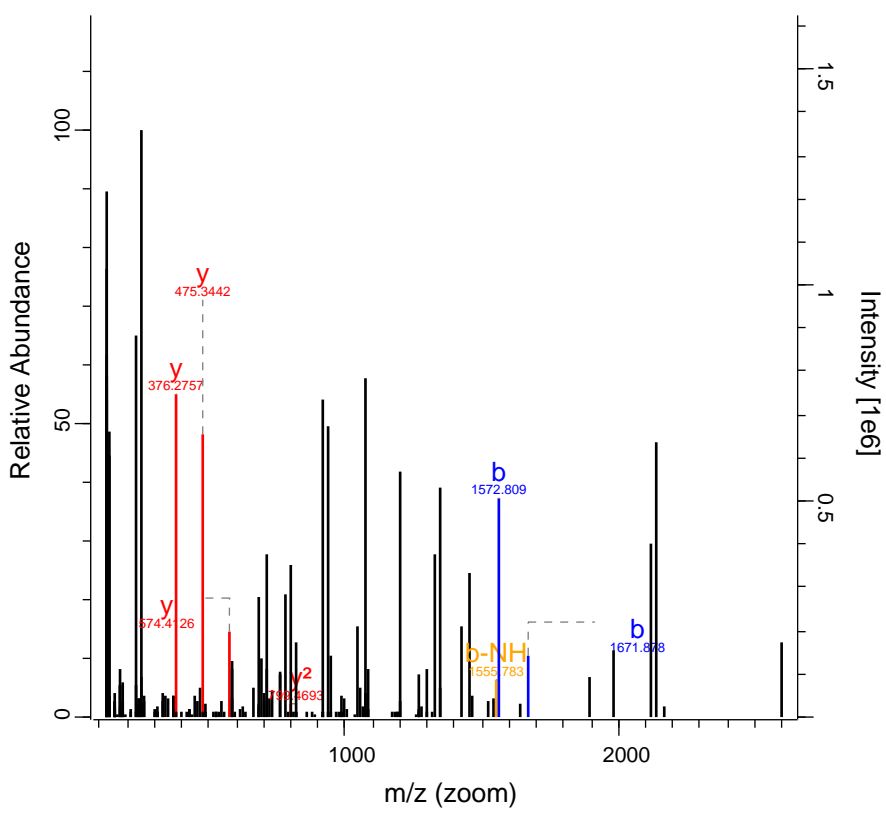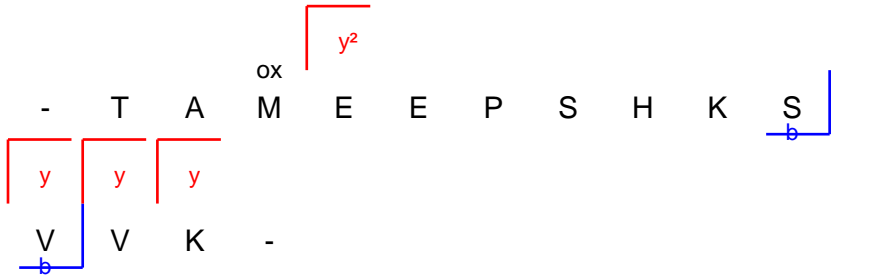

RO-QC-160121\_ZackD\_SS\_Set\_01\_Fraction 14674 FTMS; HC 59.9 470.07 WDR31

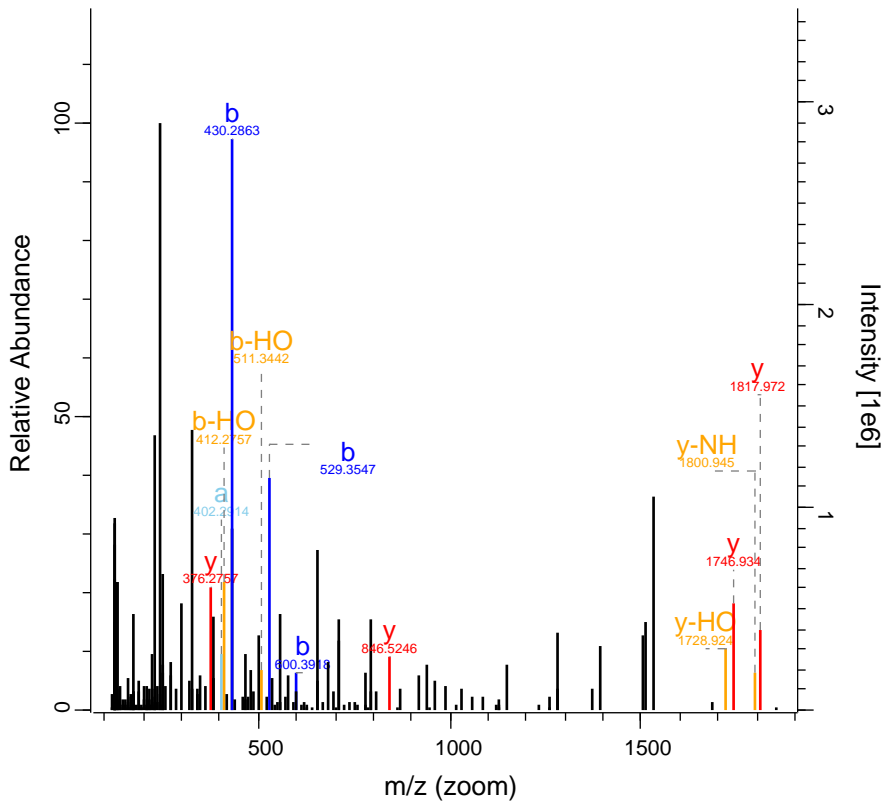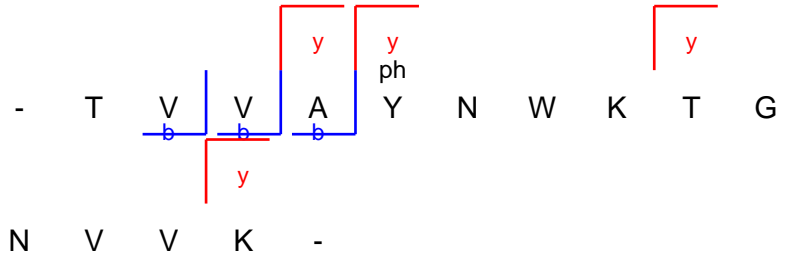

RO-QC-160121\_ZackD\_SS\_Set\_01\_Fraction 14985 FTMS; HC 45.92 683.04 OSBPL7

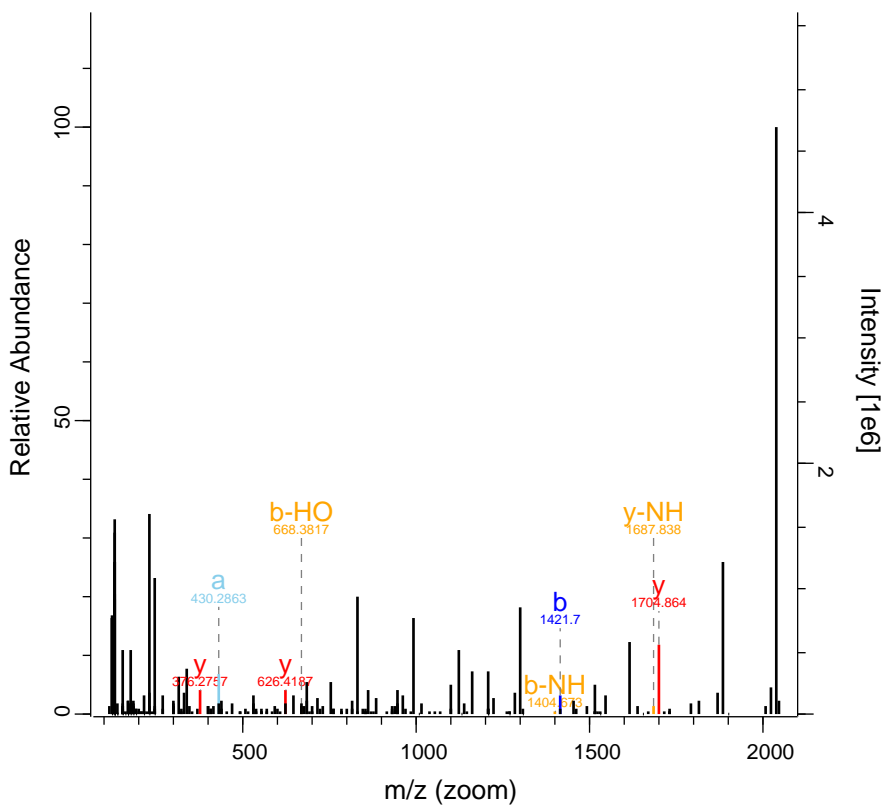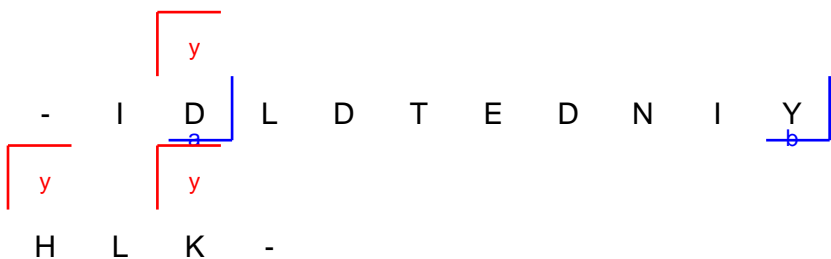

RO-QC-160121\_ZackD\_SS\_Set\_01\_Fraction 15009 FTMS; HCl 46.73 676.4 ZNF425

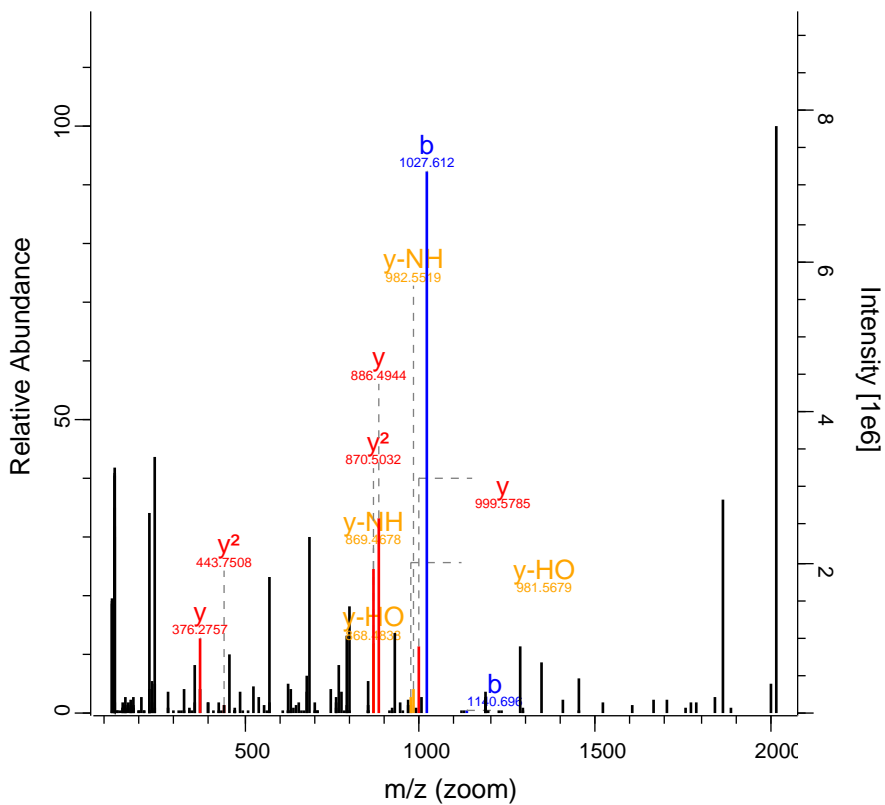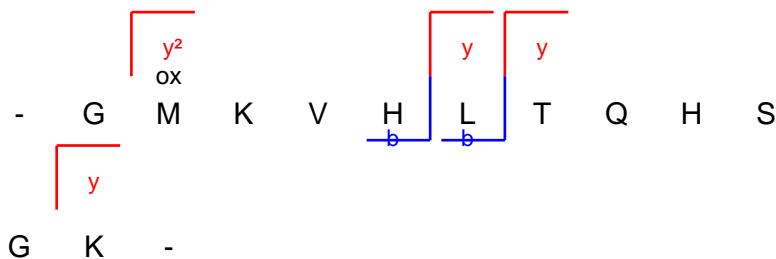

RO-QC-160121\_ZackD\_SS\_Set\_01\_Fraction 15864 FTMS; HC 56.48 684.73 GGNBP1

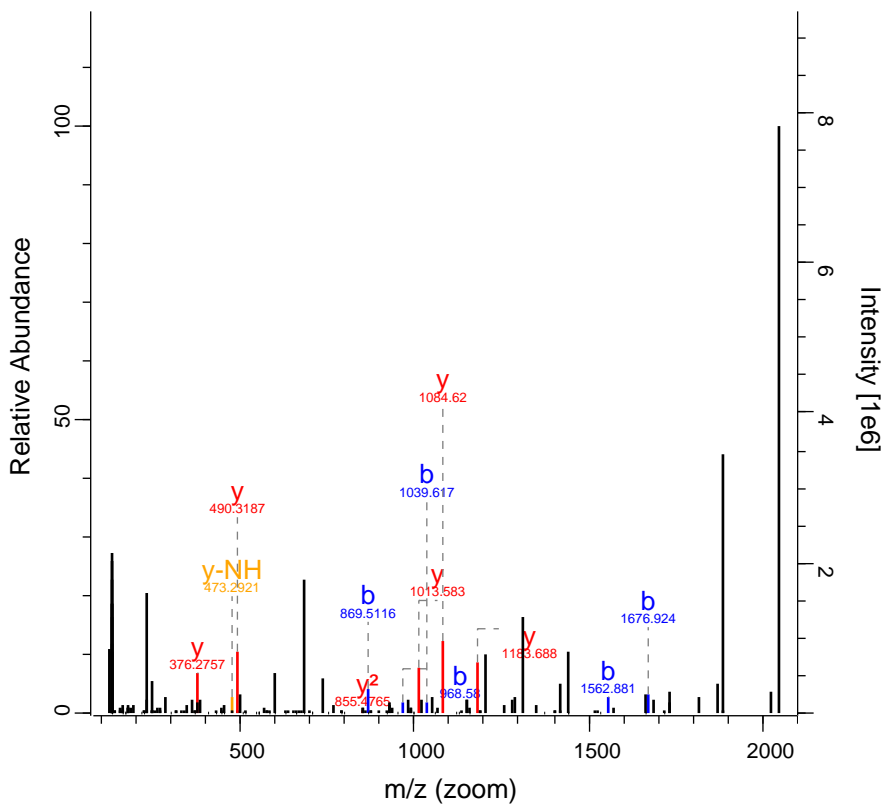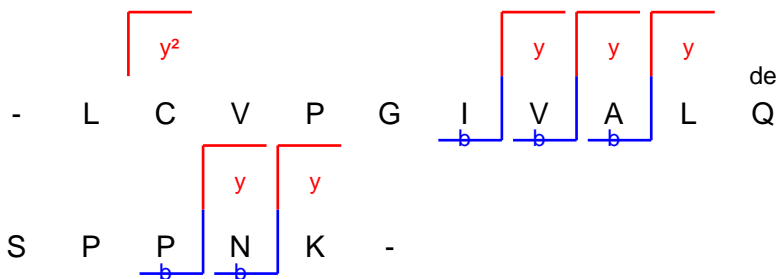

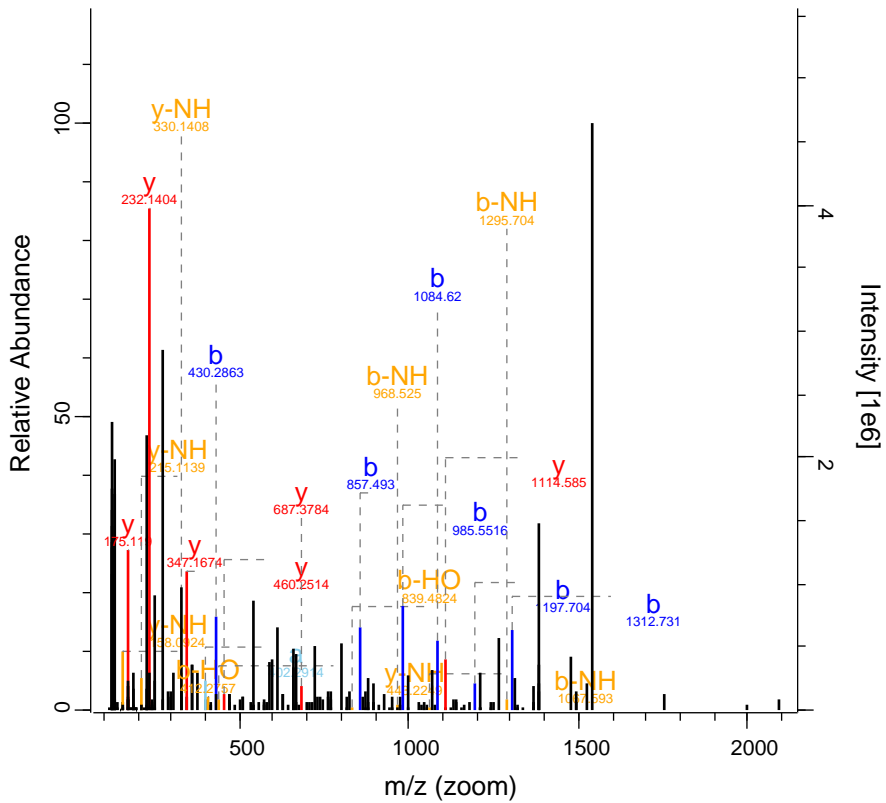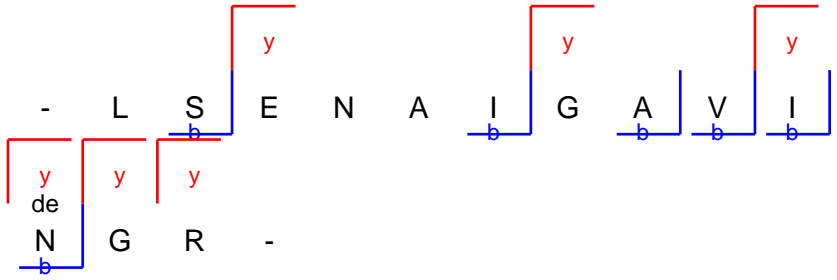



RO-QC-160121\_ZackD\_SS\_Set\_01\_Fraction 18533 FTMS; HC 51.35 964.13 SVEP1

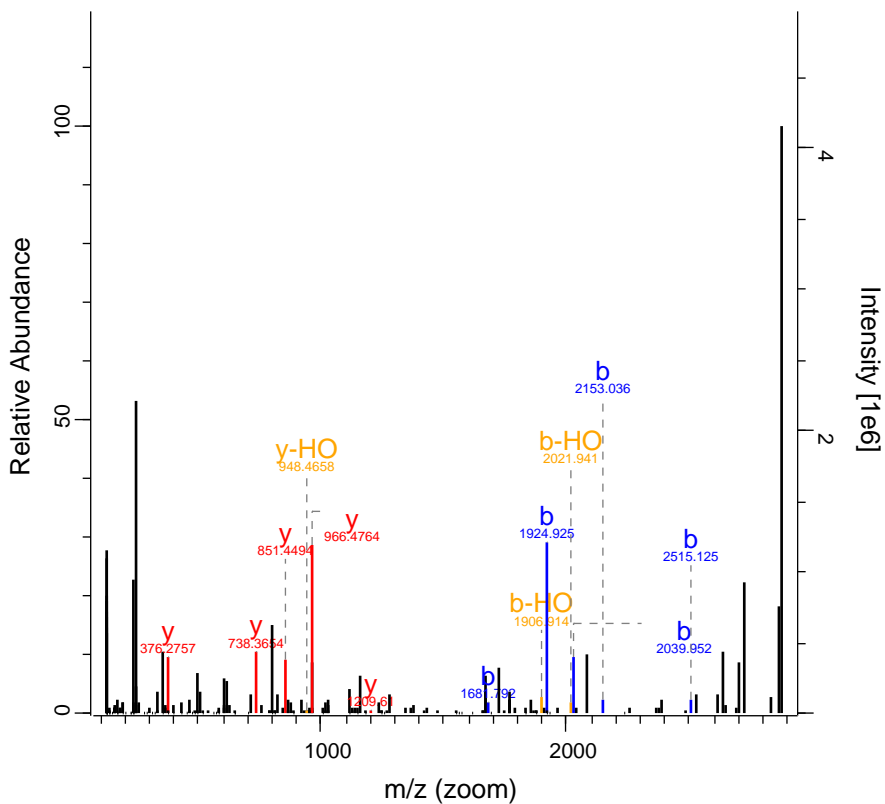

- L C P S G M Y T E Y  
 I H S R N I S D C K -

Fragmentation diagram showing peptide sequence L C P S G M Y T E Y and ion labels (b, y, de) indicating fragmentation sites. Red lines indicate y-ion fragments, and blue lines indicate b-ion fragments. The 'de' label is positioned between N and I.

RO-QC-160121\_ZackD\_SS\_Set\_01\_Fraction 18614 FTMS; HC 80.52 1445.7 SVEP1

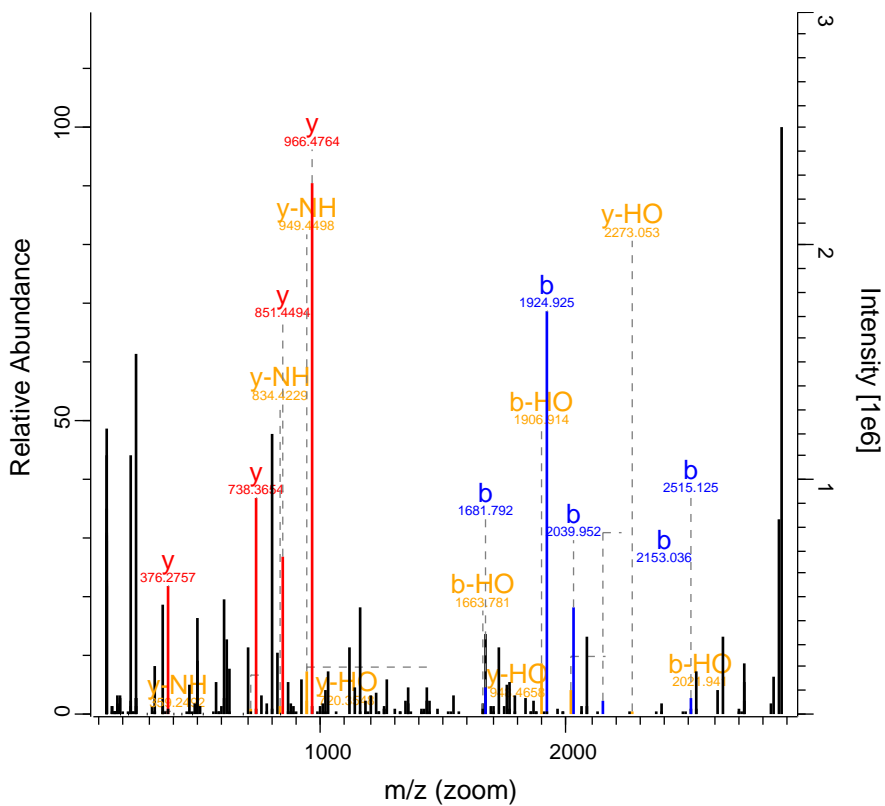

- L C P S G M Y T E Y  
 I H S R N I S D C K -

Fragmentation diagram showing peptide sequence: L C P S G M Y T E Y. The sequence is split into two rows: the top row contains the amino acids L, C, P, S, G, M, Y, T, E, Y; the bottom row contains I, H, S, R, N, I, S, D, C, K. Blue brackets (b) connect H to S, R to N, N to I, I to S, and C to K. Red brackets (y) connect S to G, G to M, M to Y, and E to Y.

RO-QC-160121\_ZackD\_SS\_Set\_01\_Fraction1 19032 FTMS; HCl62.2 723.6 SVEP1

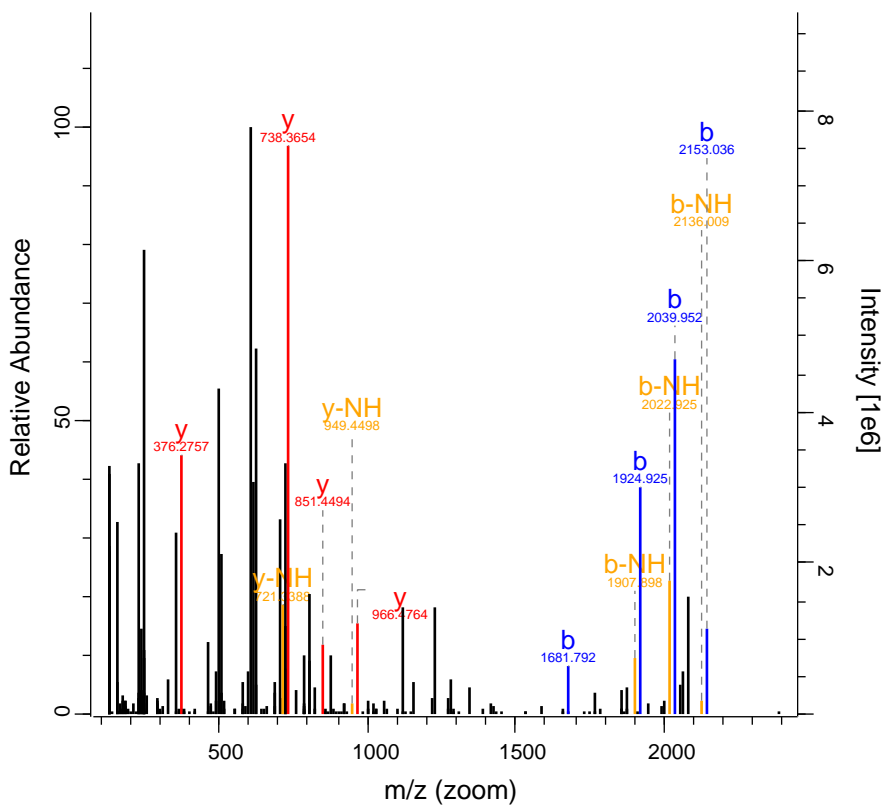

- L C P S G M Y T E Y  
 I H S R N I S D C K -

Fragmentation diagram showing the sequence of amino acids: L, C, P, S, G, M, Y, T, E, Y. The diagram illustrates the formation of b and y ions from the sequence, with b ions labeled in blue and y ions labeled in red. The b ions are labeled as b, b, b, b, b, b, b, b, b, b. The y ions are labeled as y, de, y, y, y.

RO-QC-160121\_ZackD\_SS\_Set\_01\_Fraction 19286 FTMS; HC 71.88 746.44 GRIN2A

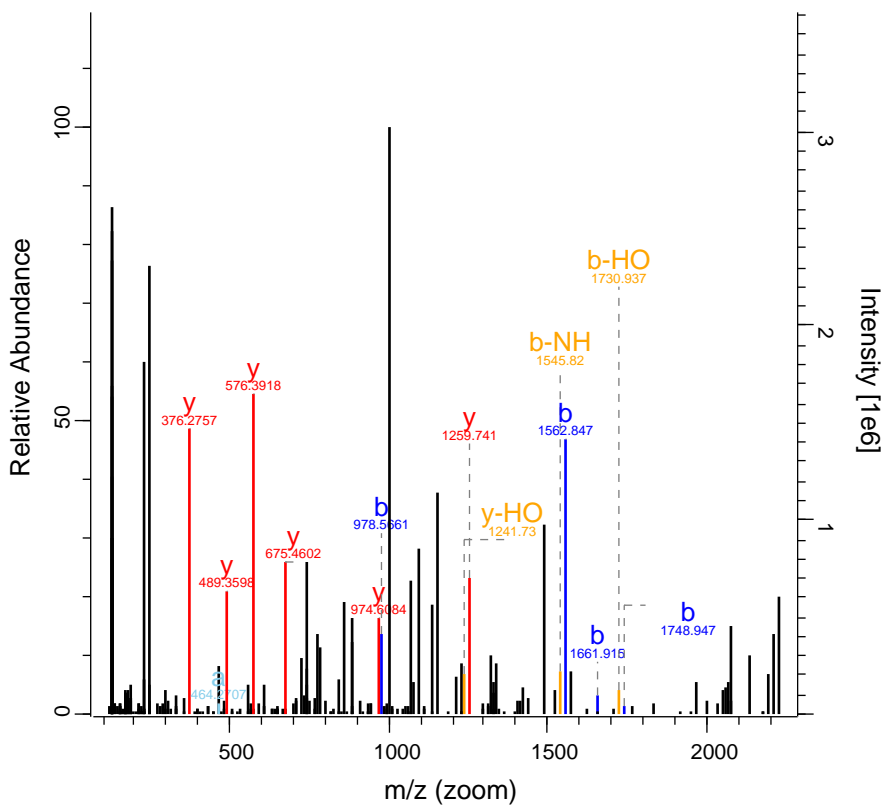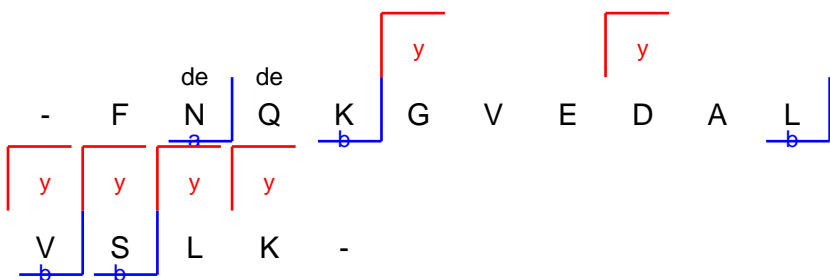

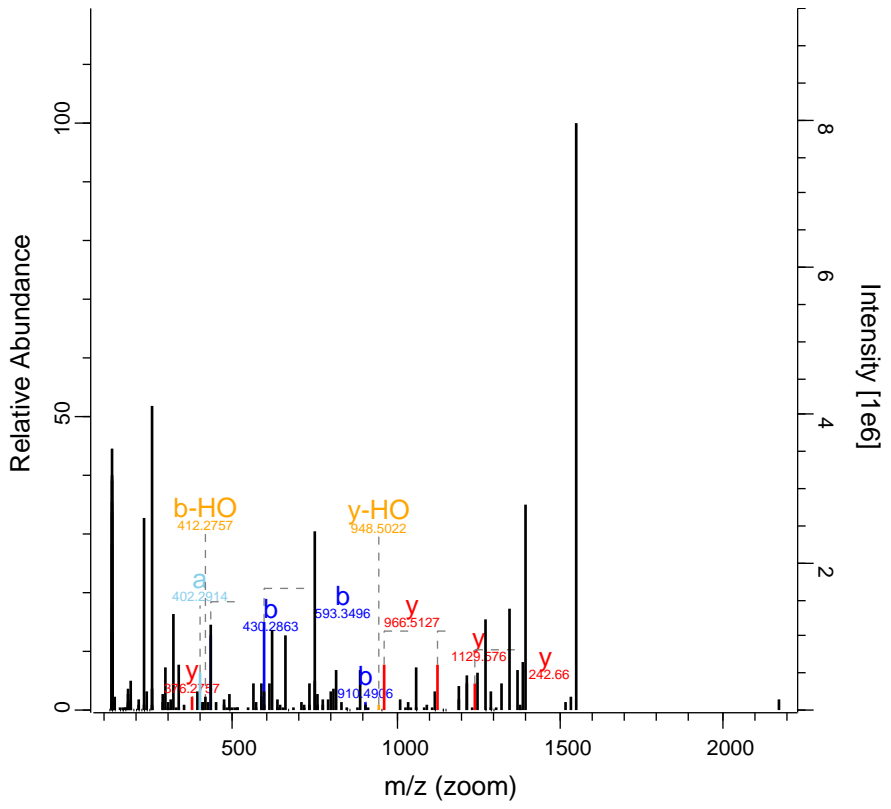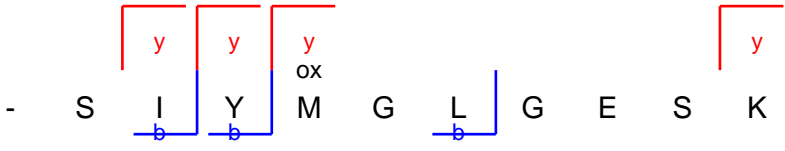

- S I Y M G L G E S K

-

RO-QC-160121\_ZackD\_SS\_Set\_01\_Fraction 20152 FTMS; HC 55.53 825.42 CELSR3

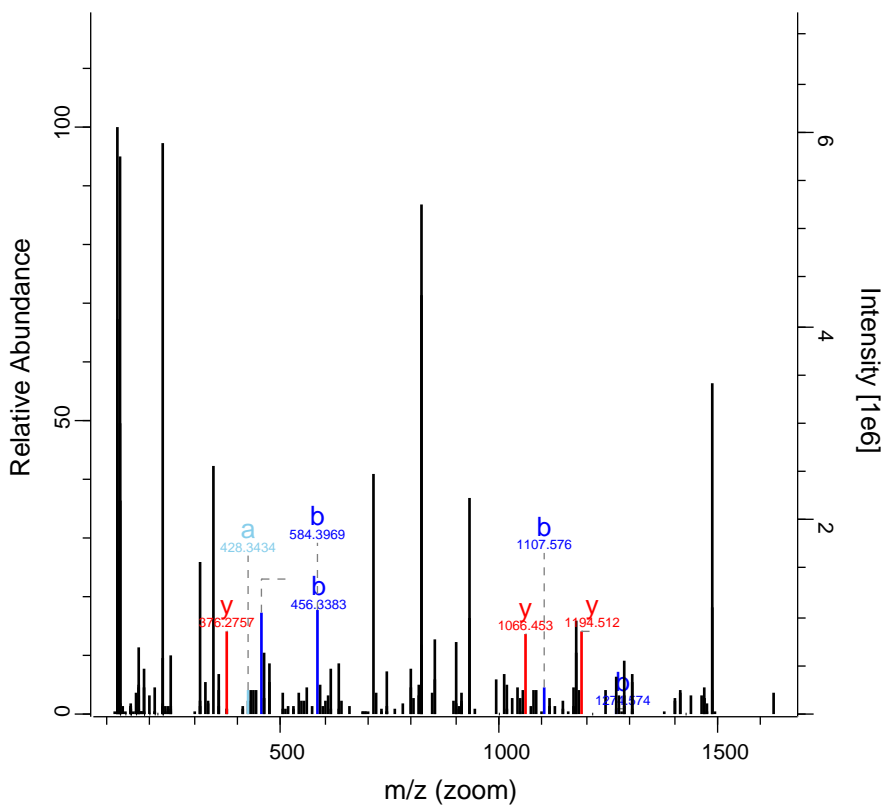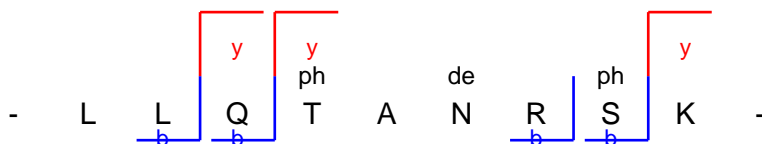

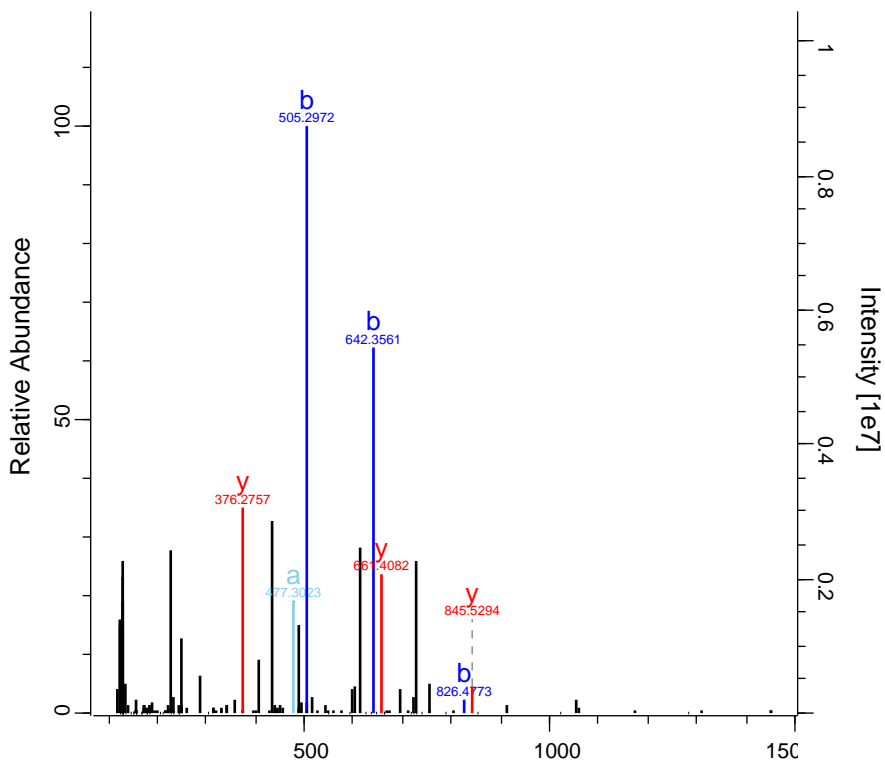

m/z (zoom)

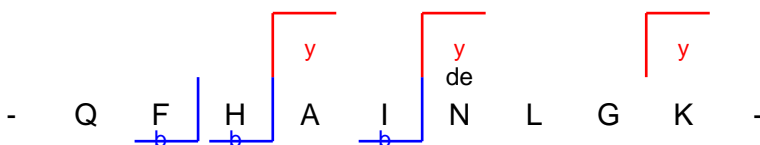

RO-QC-160121\_ZackD\_SS\_Set\_01\_Fraction 22559 FTMS; HC 168.8 780.46 CAGE1

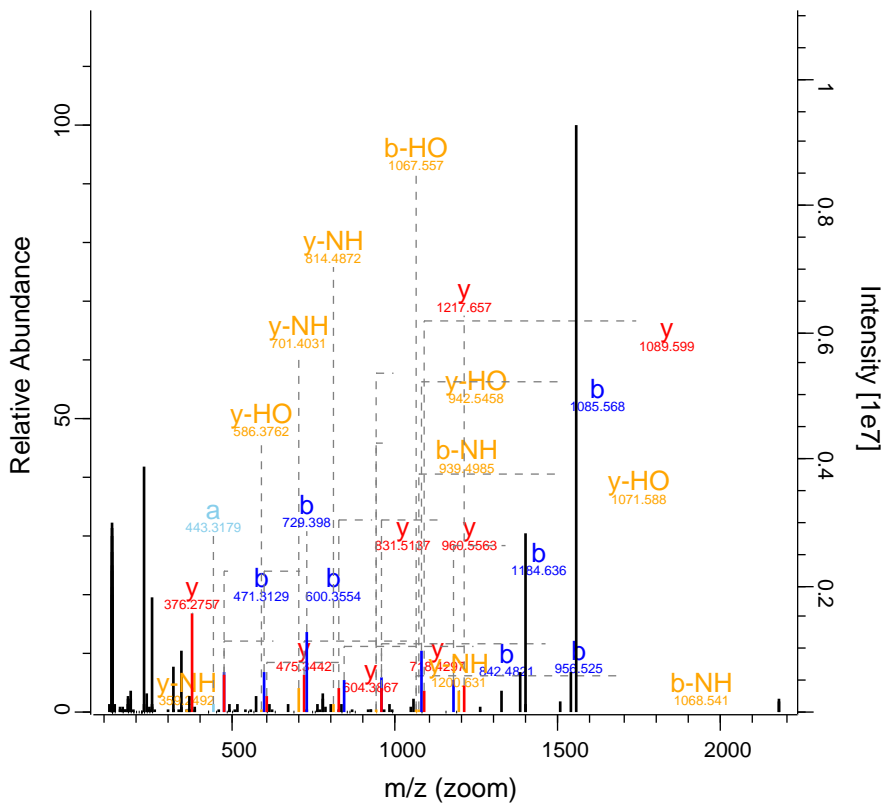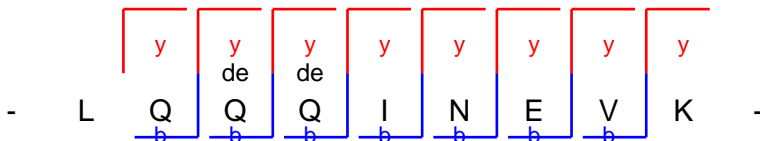





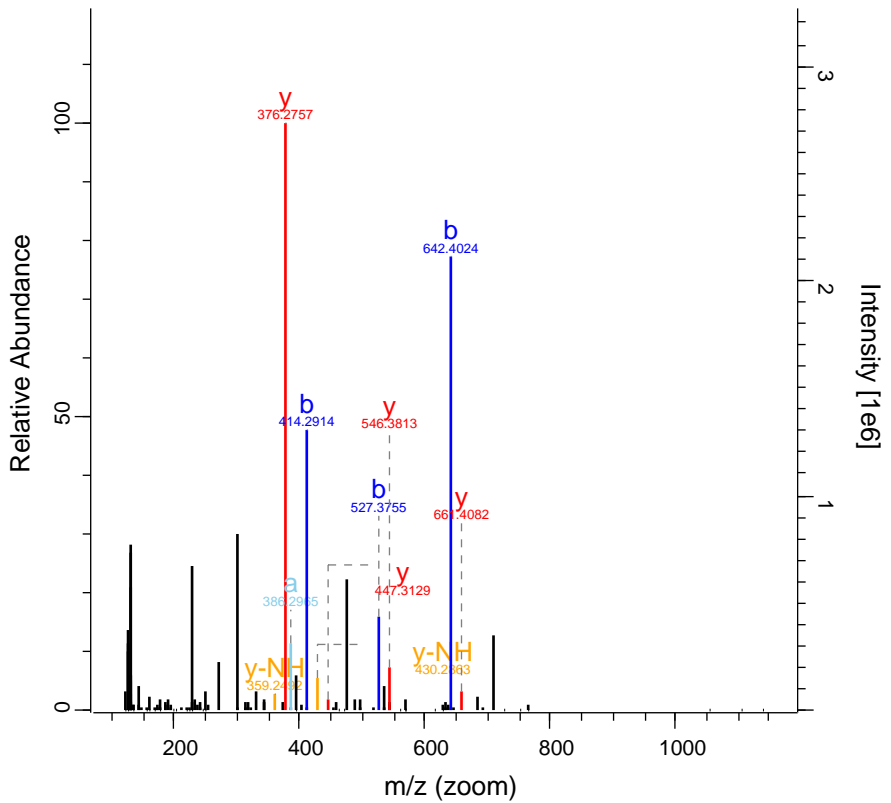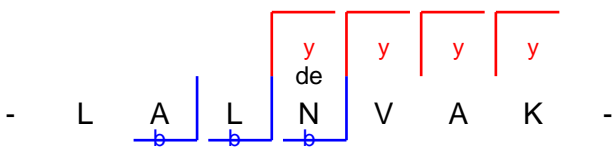

Raw File

Scan Method

Score m/z

RO-QC-160121\_ZackD\_SS\_Set\_01\_Fraction\_8

23502

FTMS; HCD

86.95

609.4

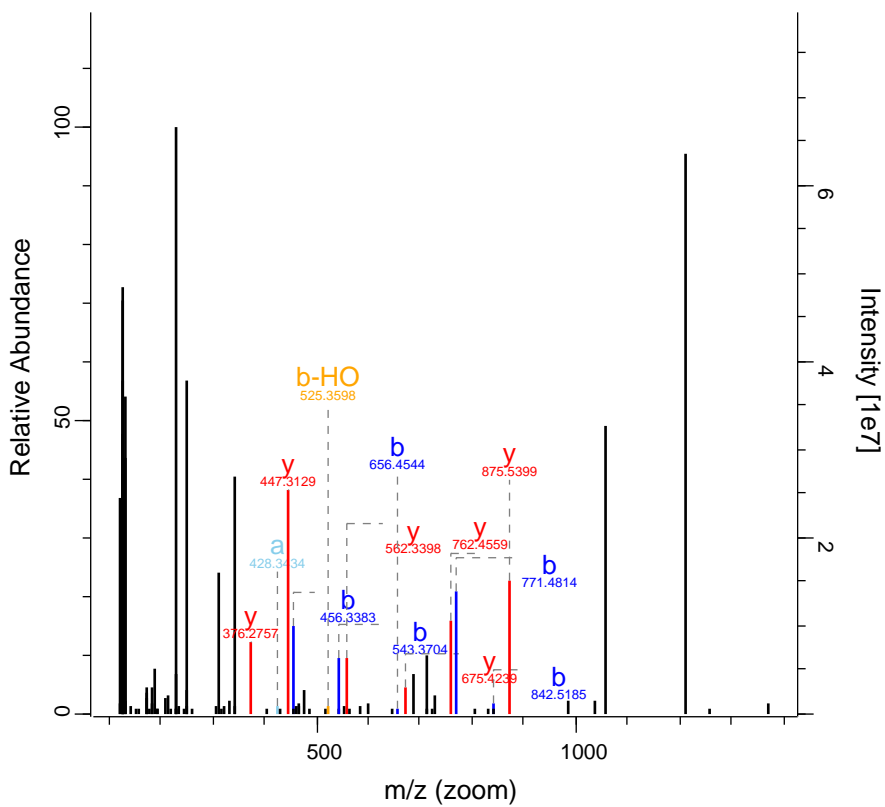

m/z (zoom)

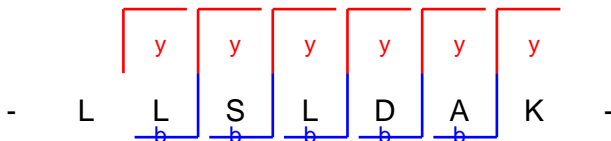

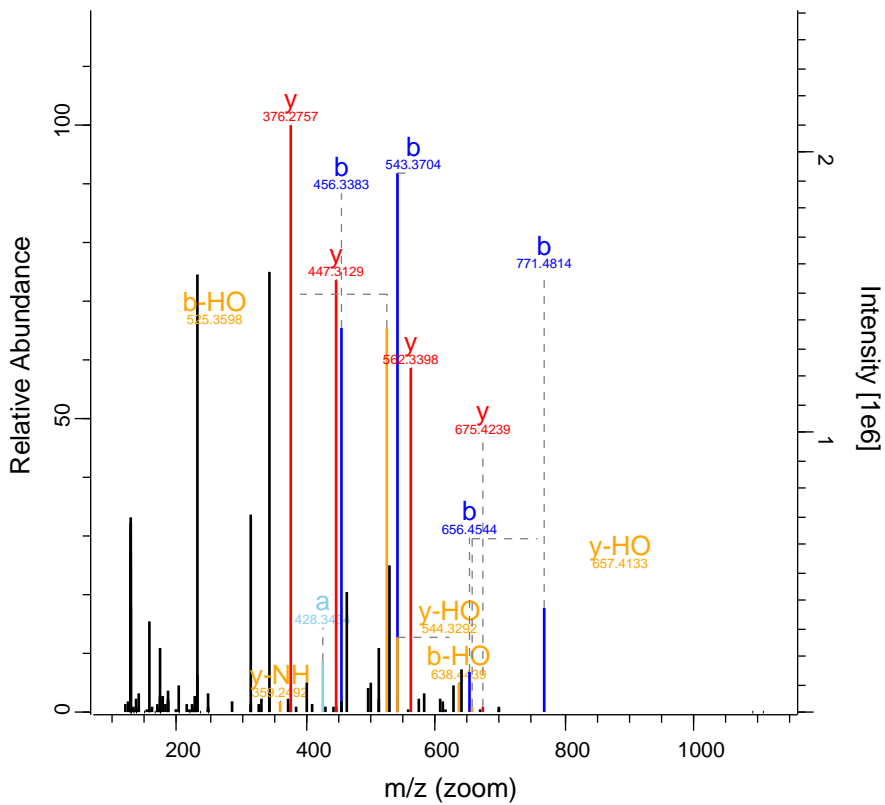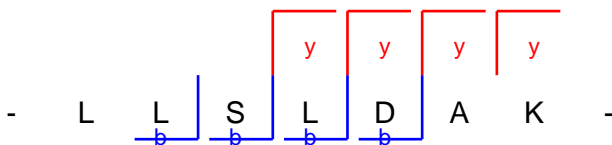

RO-QC-160121\_ZackD\_SS\_Set\_01\_Fraction 23867 FTMS; HC 56.42 829.91 C6orf120

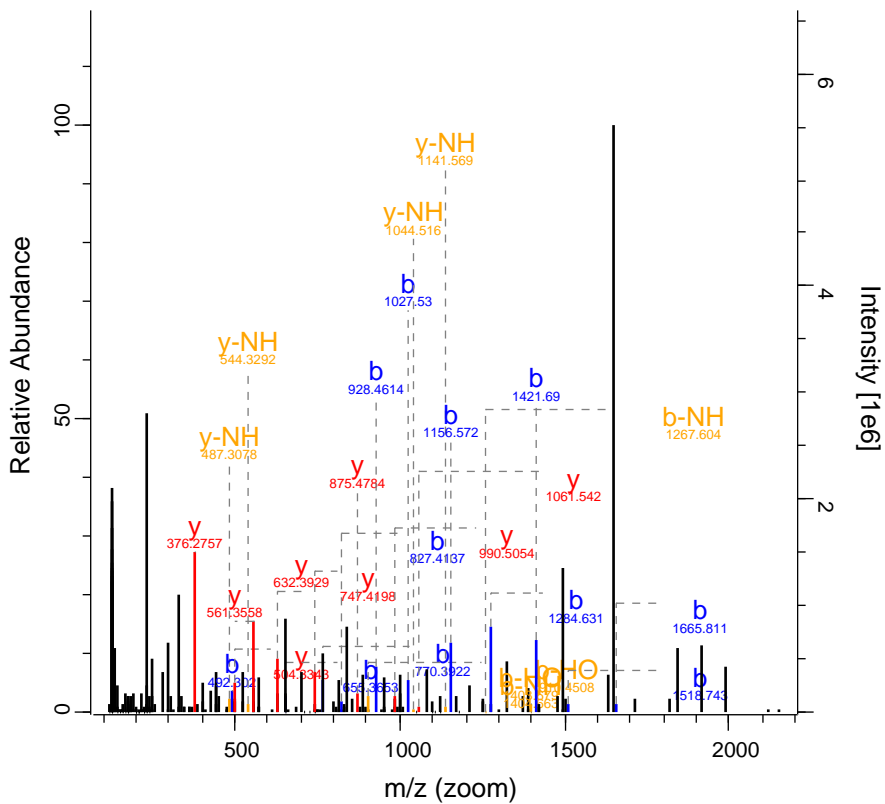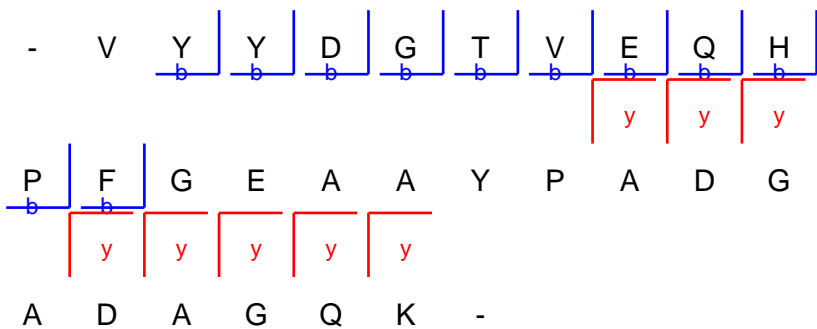



RO-QC-160121\_ZackD\_SS\_Set\_01\_Fractic 23895 FTMS; HC 161.39 1105.87 C6orf120

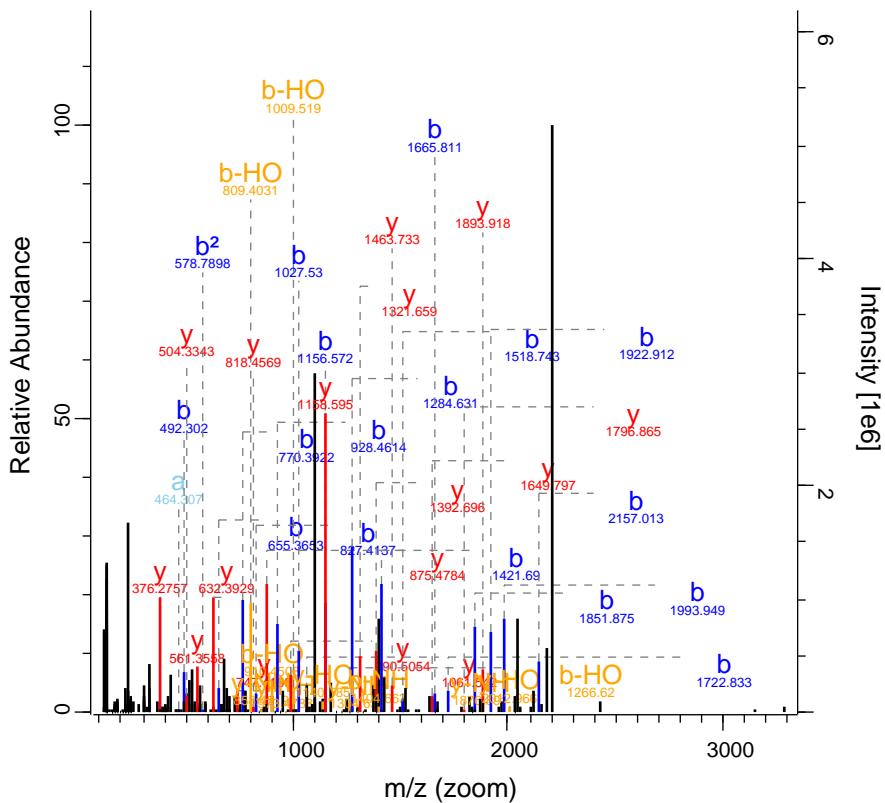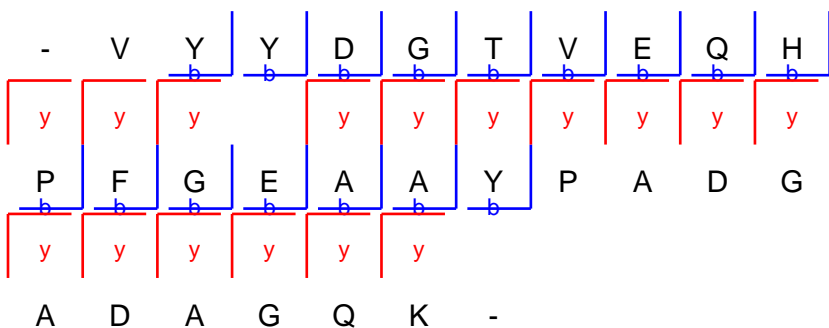

Raw File

Scan Method Score m/z

RO-QC-160121\_ZackD\_SS\_Set\_01\_Fraction\_8

24572 FTMS; HCD 46.71 598.99

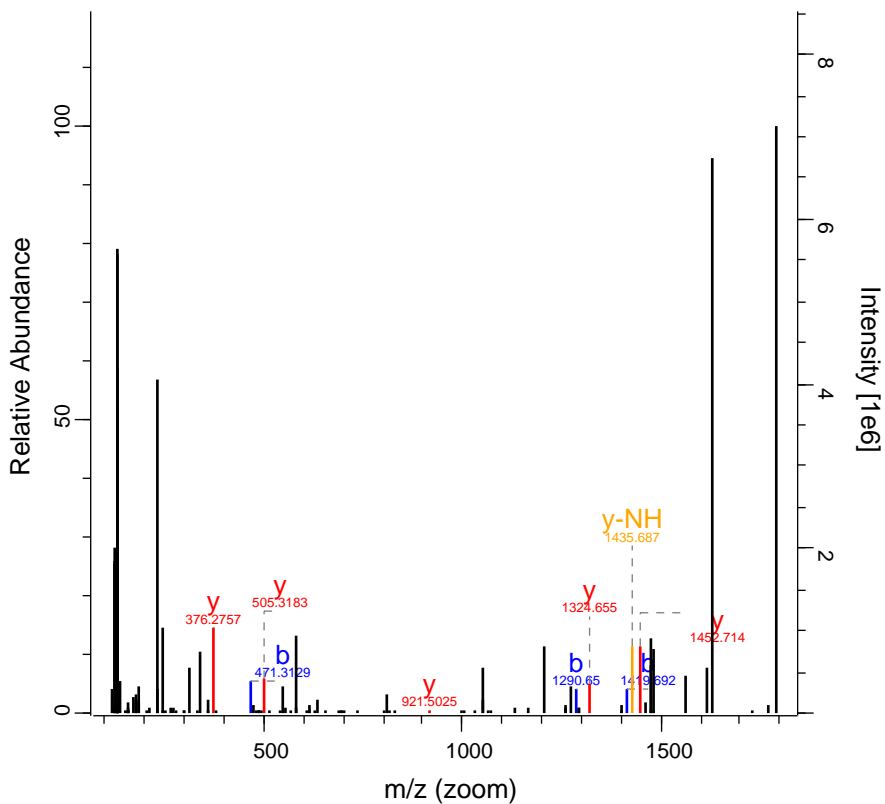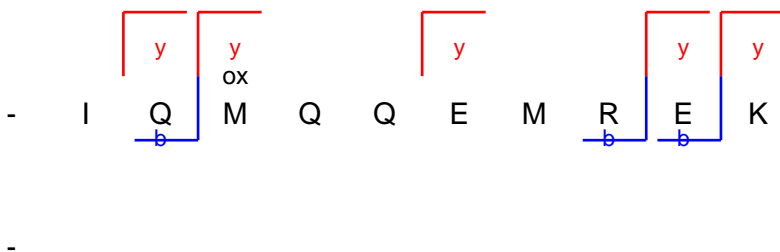



RO-QC-160121\_ZackD\_SS\_Set\_01\_Fractio 25672 FTMS; HC 124.08 736.91 HIC1

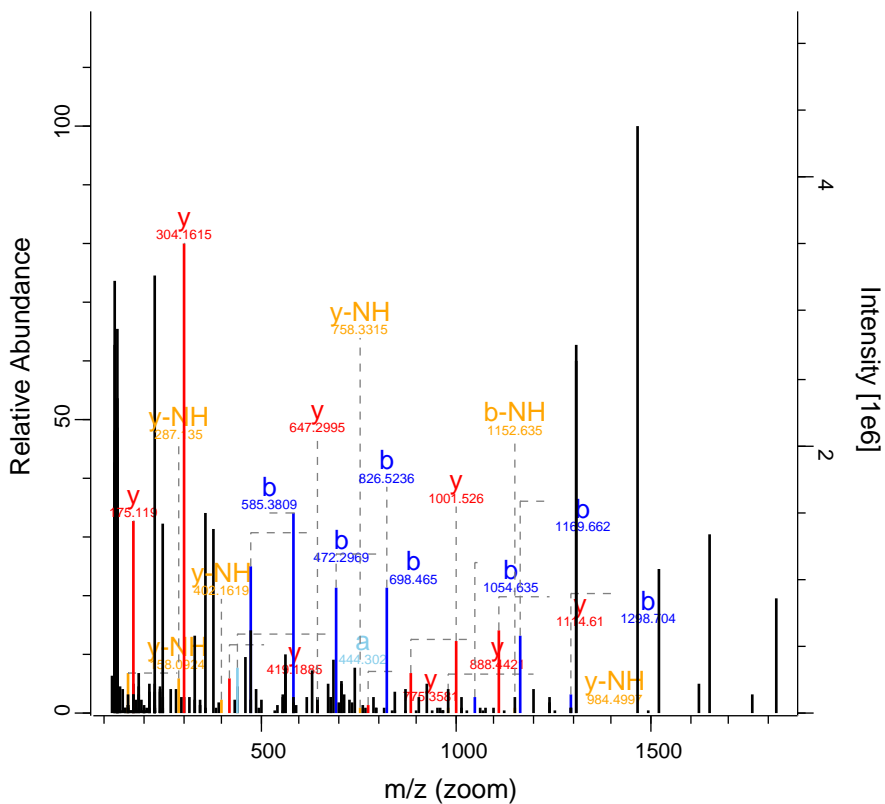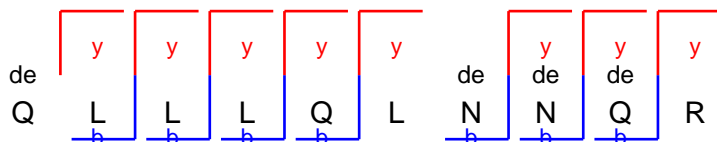

RO-QC-160121\_ZackD\_SS\_Set\_01\_Fractio 26321 FTMS; HC 124.67 766.48 UBIAD1

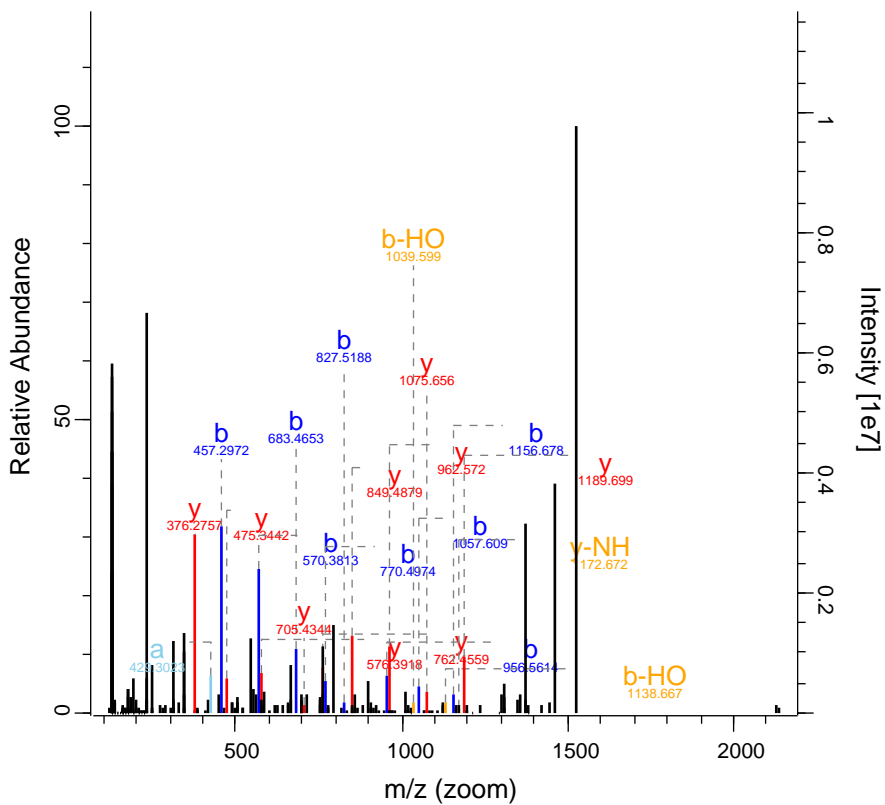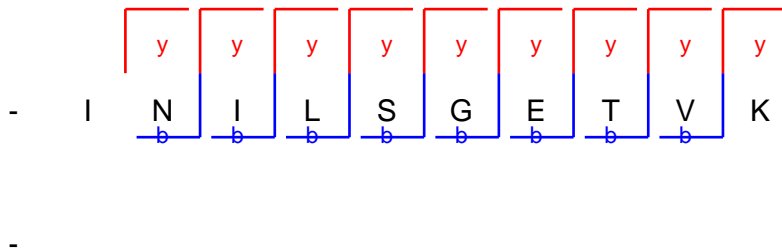

RO-QC-160121\_ZackD\_SS\_Set\_01\_Fractic 26990 FTMS; HC 56.2 1116.63 CNGA2

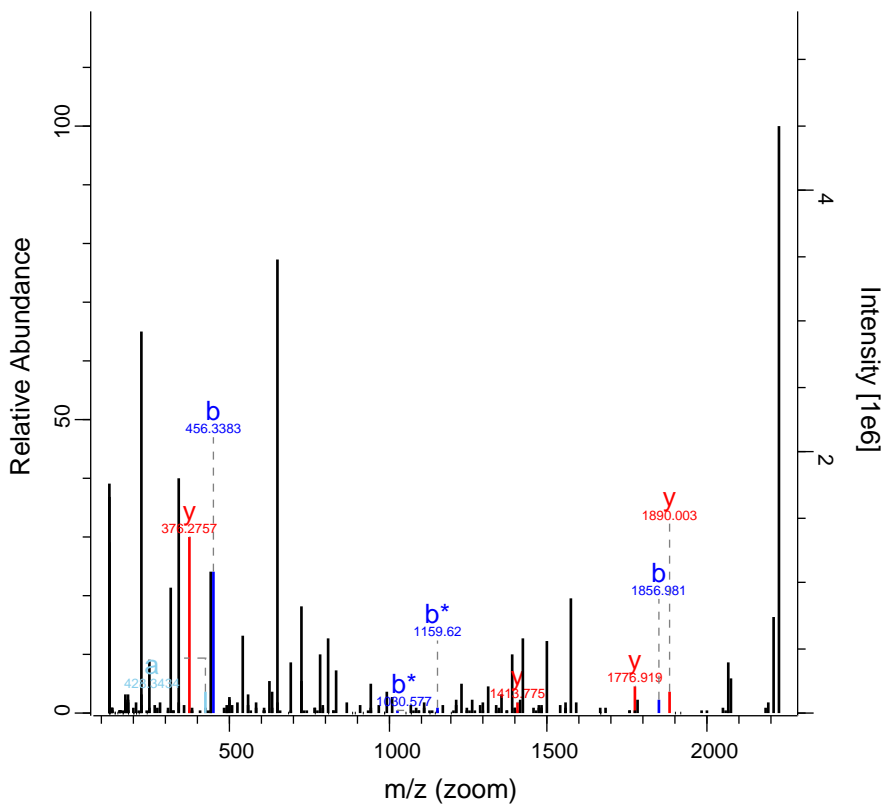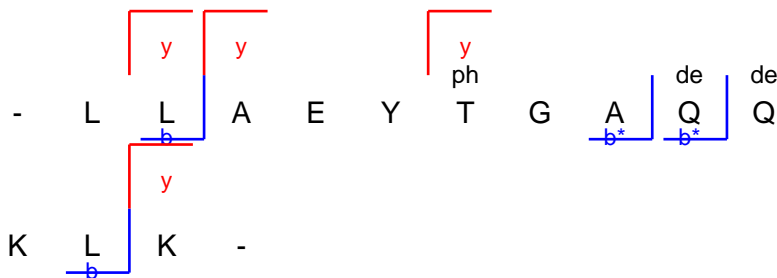



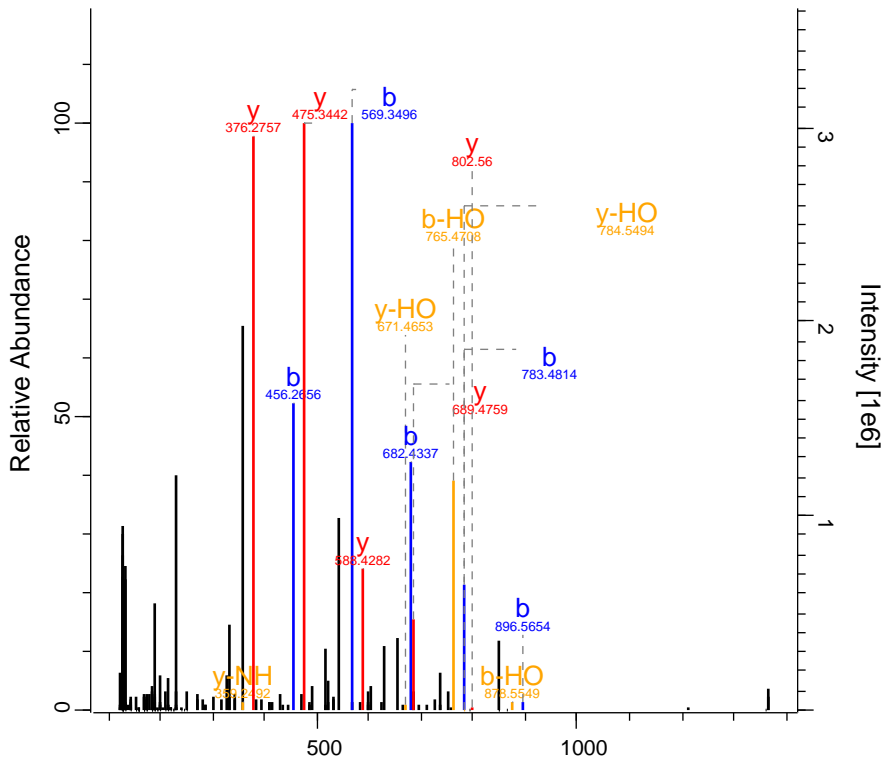

m/z (zoom)

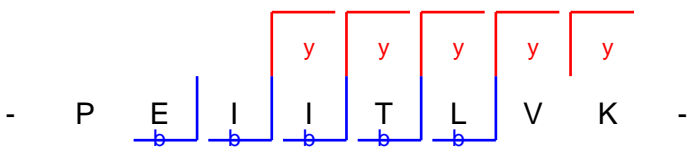

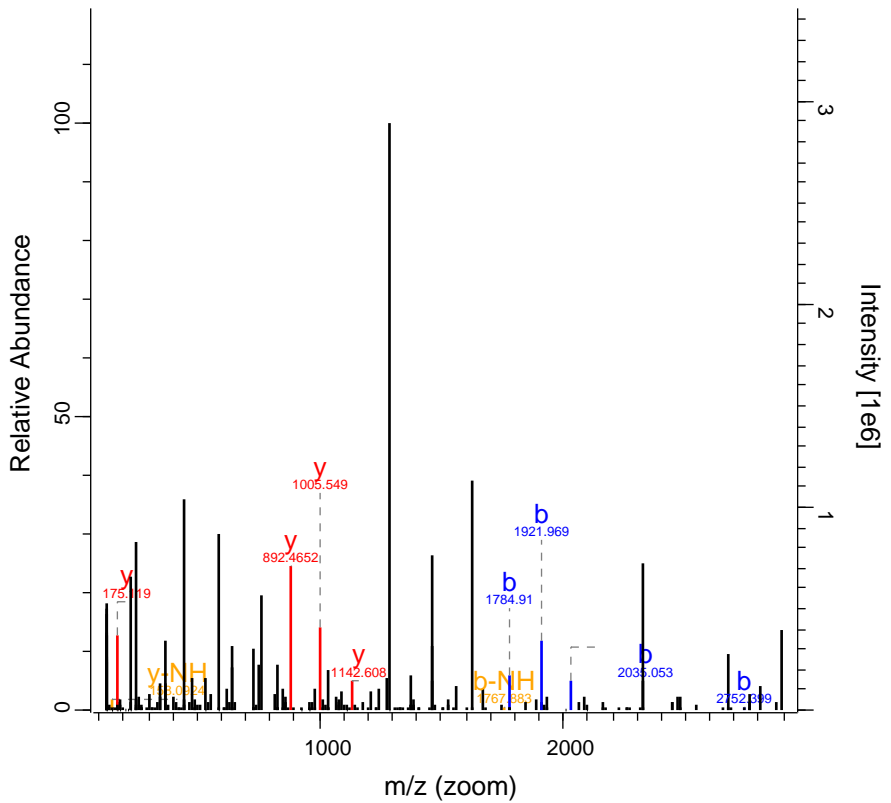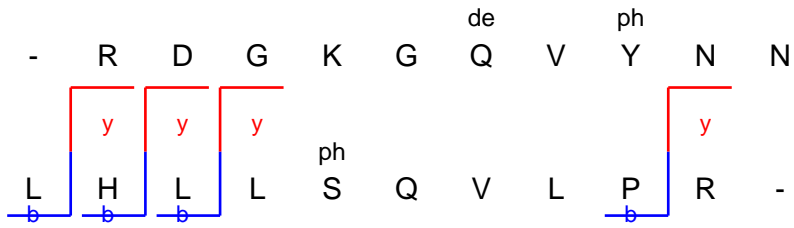

RO-QC-160121\_ZackD\_SS\_Set\_01\_Fractic 33217 FTMS; HC 91.94 1315.12 ZNF540

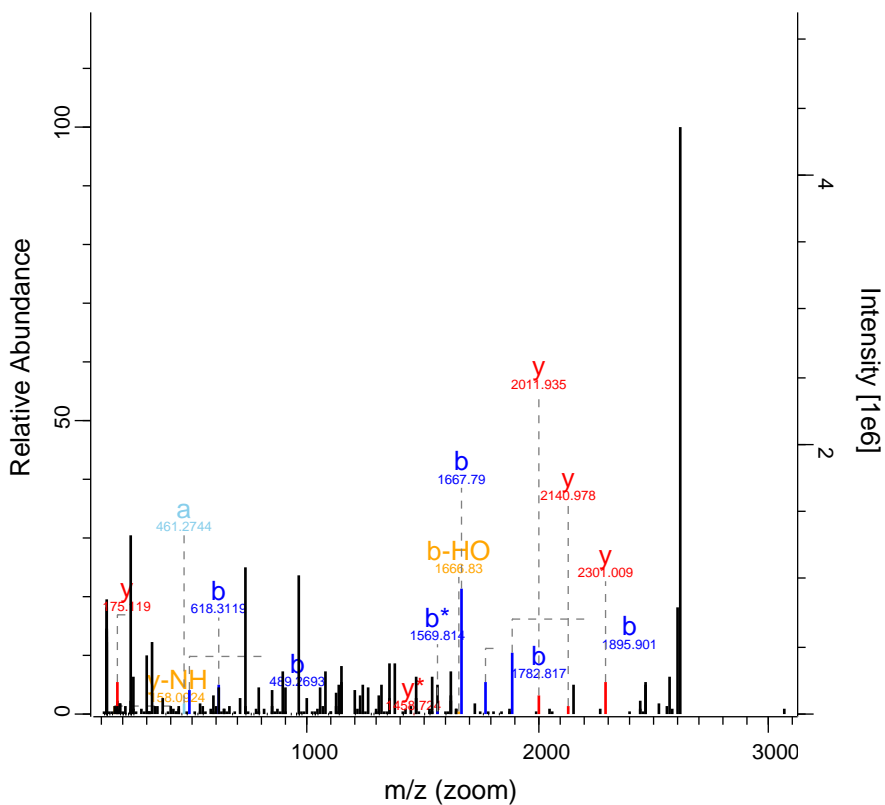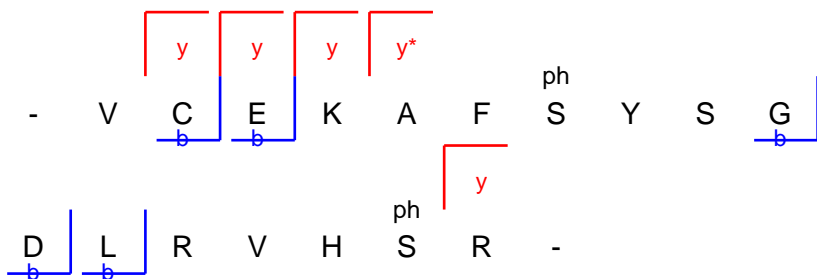

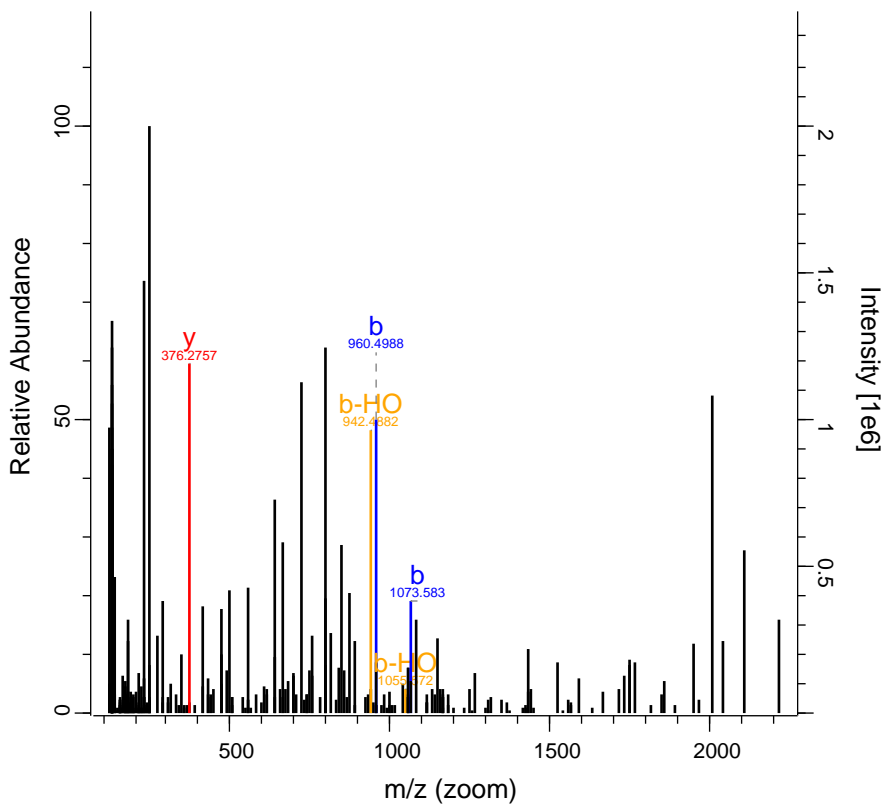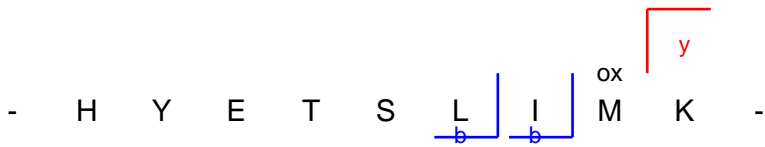



RO-QC-160121\_ZackD\_SS\_Set\_01\_Fractic 33931 FTMS; HC 56.23 1315.12 ZNF540

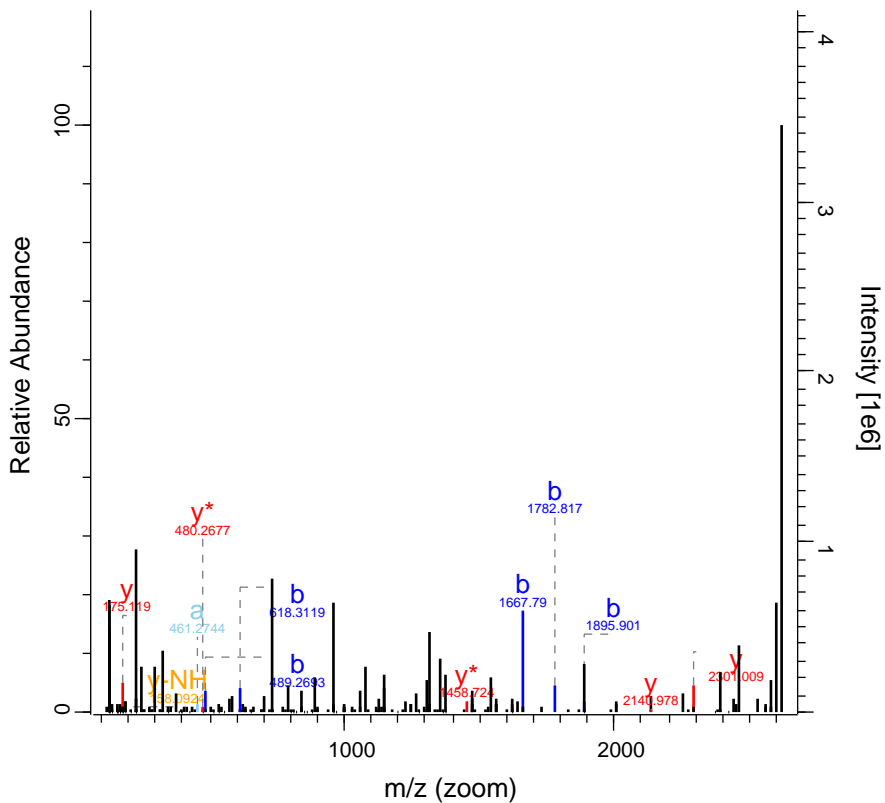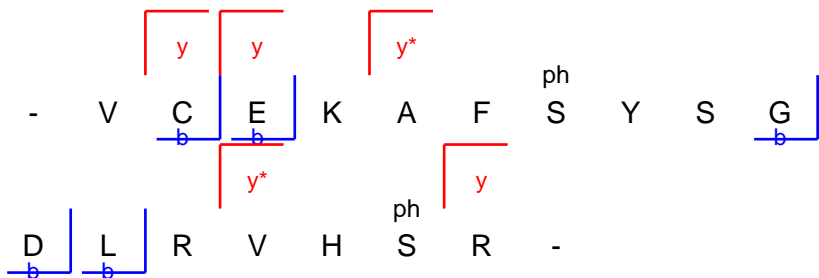

RO-QC-160121\_ZackD\_SS\_Set\_01\_Fraction 34863 FTMS; HC 72.61 890.03 ASH1L

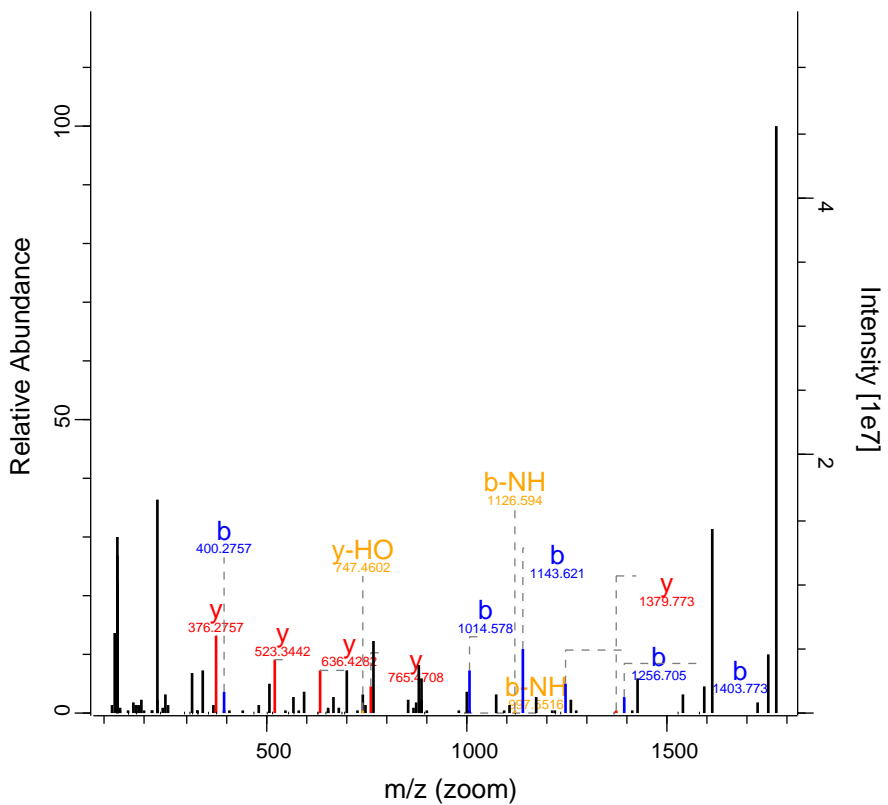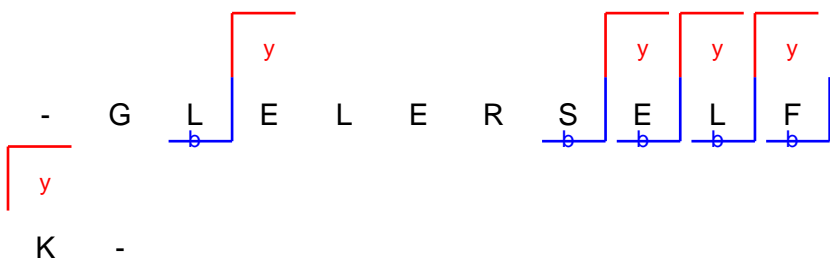

RO-QC-160121\_ZackD\_SS\_Set\_01\_Fraction 34870 FTMS; HC 69.98 703.89 BLOC1S6

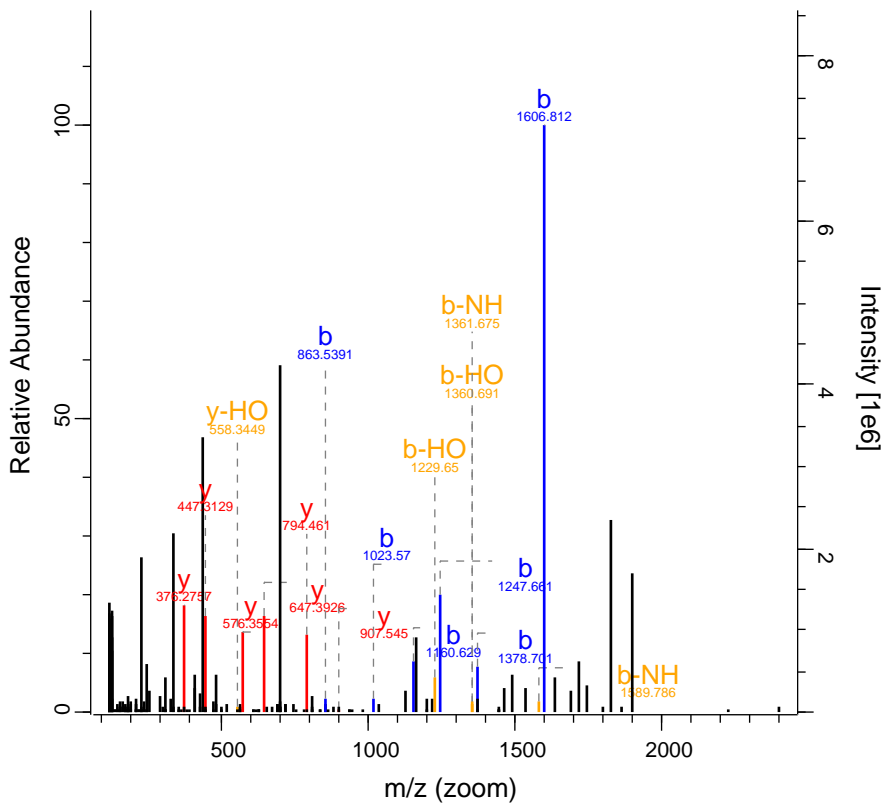

- F K E C H S M L D I

y y y y y y

N A L F A E A K -

RO-QC-160121\_ZackD\_SS\_Set\_01\_Fraction 35997 FTMS; HC 44.2 921.21 CCDC176

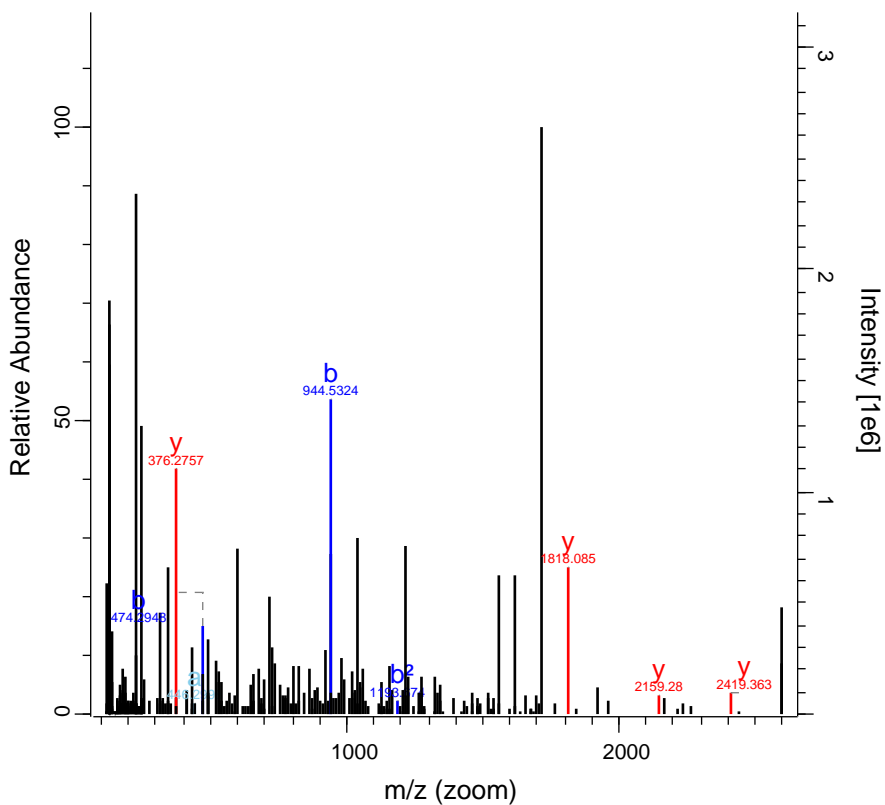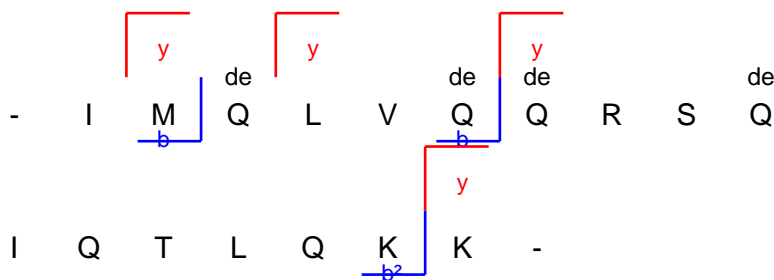



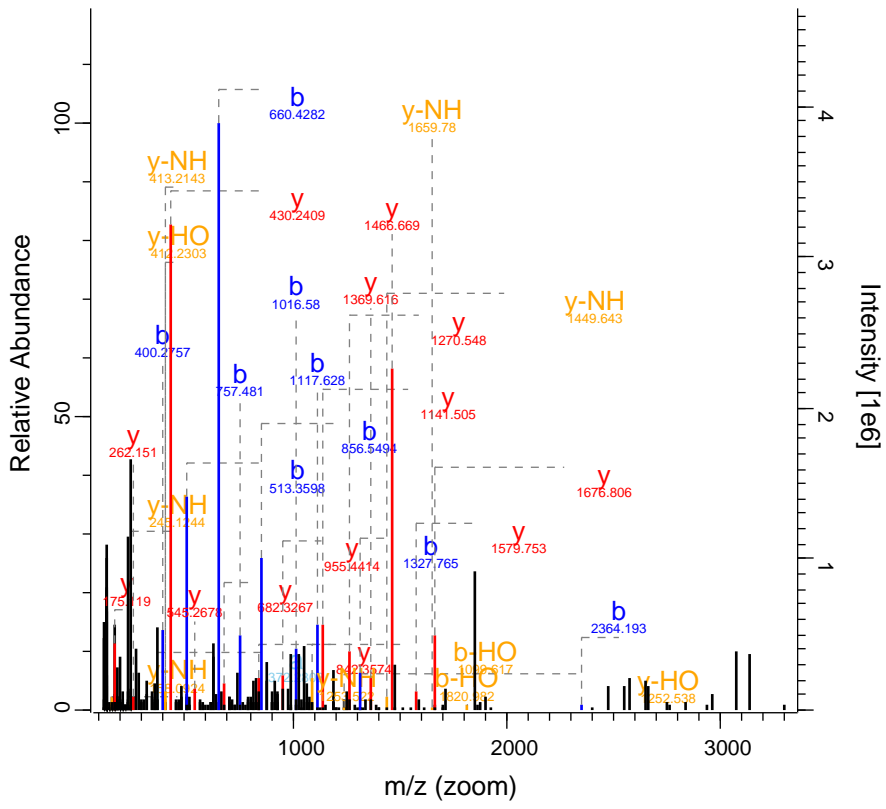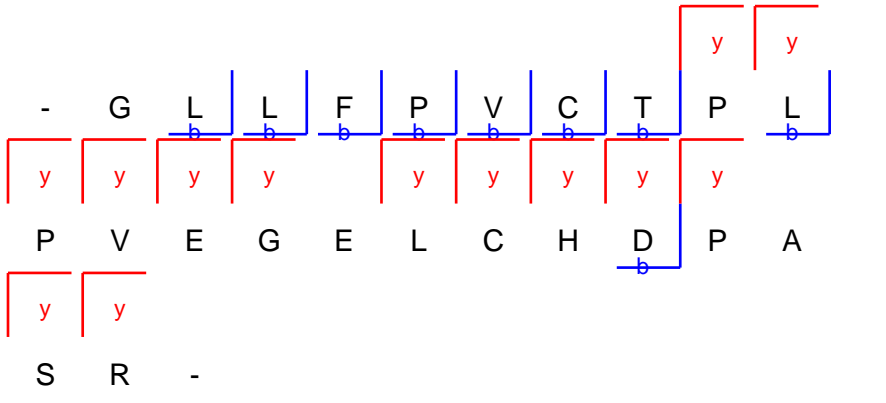

| Raw File                                | Scan  | Method    | Score | m/z    |
|-----------------------------------------|-------|-----------|-------|--------|
| RO-QC-160121_ZackD_SS_Set_01_Fraction_8 | 36937 | FTMS; HCD | 43.25 | 817.47 |

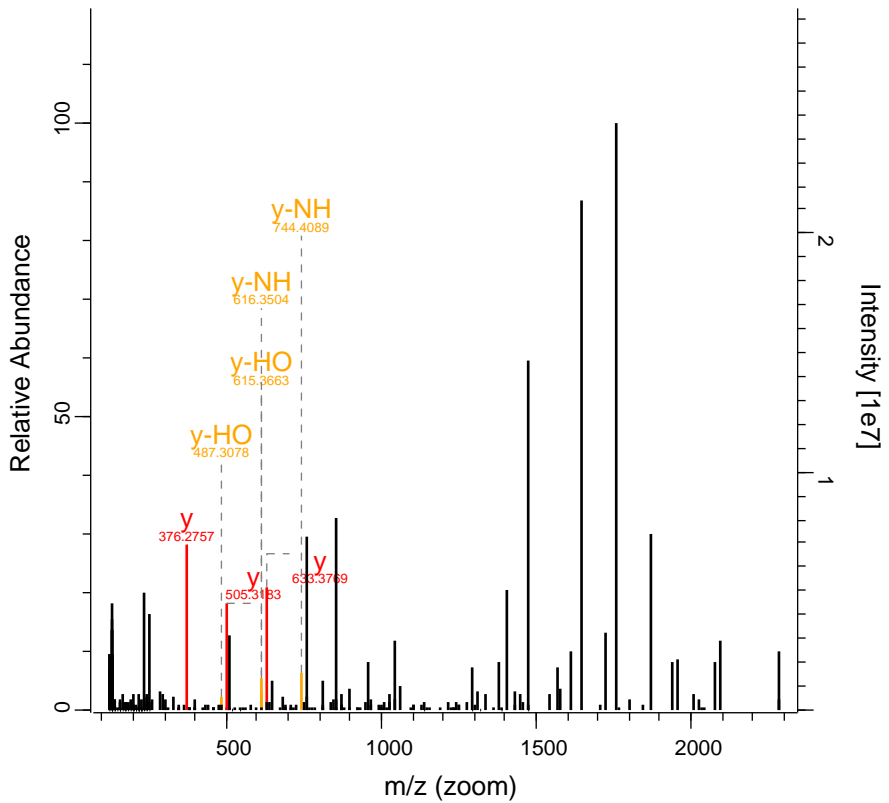

| ac |   |   |   |   |   |   | ox |   |   |   |
|----|---|---|---|---|---|---|----|---|---|---|
| -  | A | A | K | I | A | M | Q  | Q | E | K |

Fragmentation labels: y, y, y (indicated by red brackets above the Q, E, and K residues).

-

RO-QC-160121\_ZackD\_SS\_Set\_01\_Fraccio 38067 FTMS; HC 101.17 627.05 ALKBH7

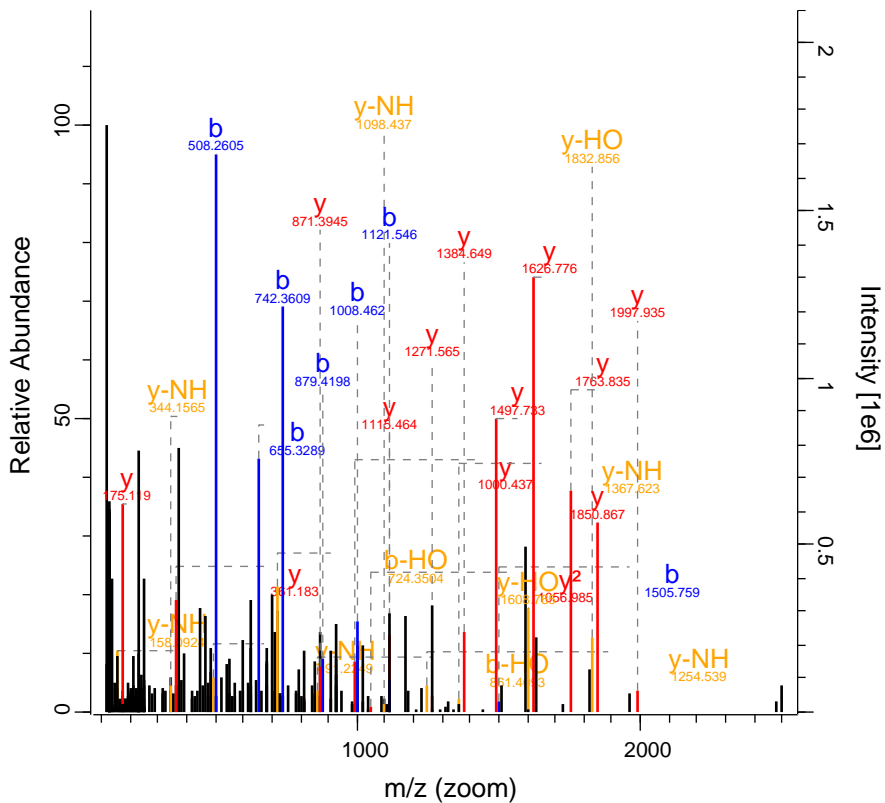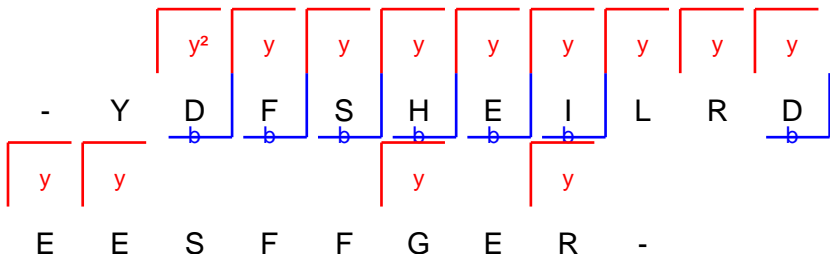



RO-QC-160121\_ZackD\_SS\_Set\_01\_Fractio 38264 FTMS; HC 118.26 785.95 SNX7

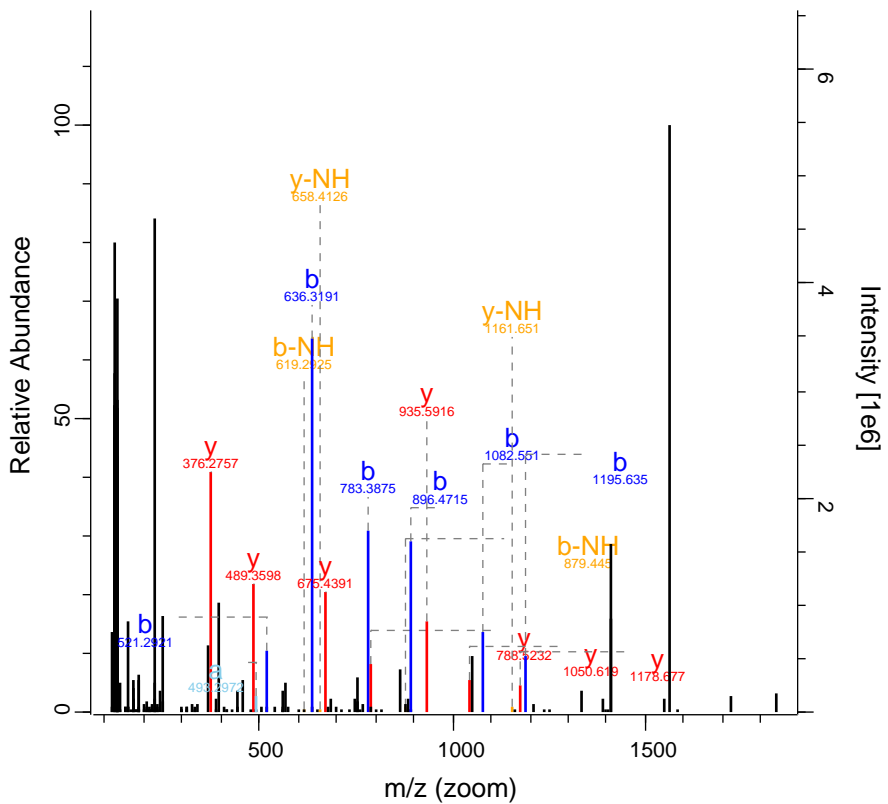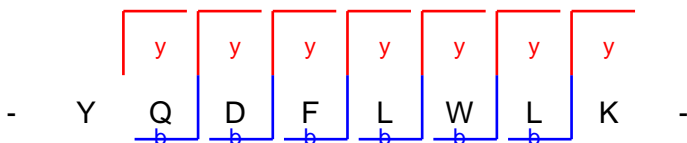

RO-QC-160121\_ZackD\_SS\_Set\_01\_Fraction 41432 FTMS; HCl 104.61 873.5 N6AMT2

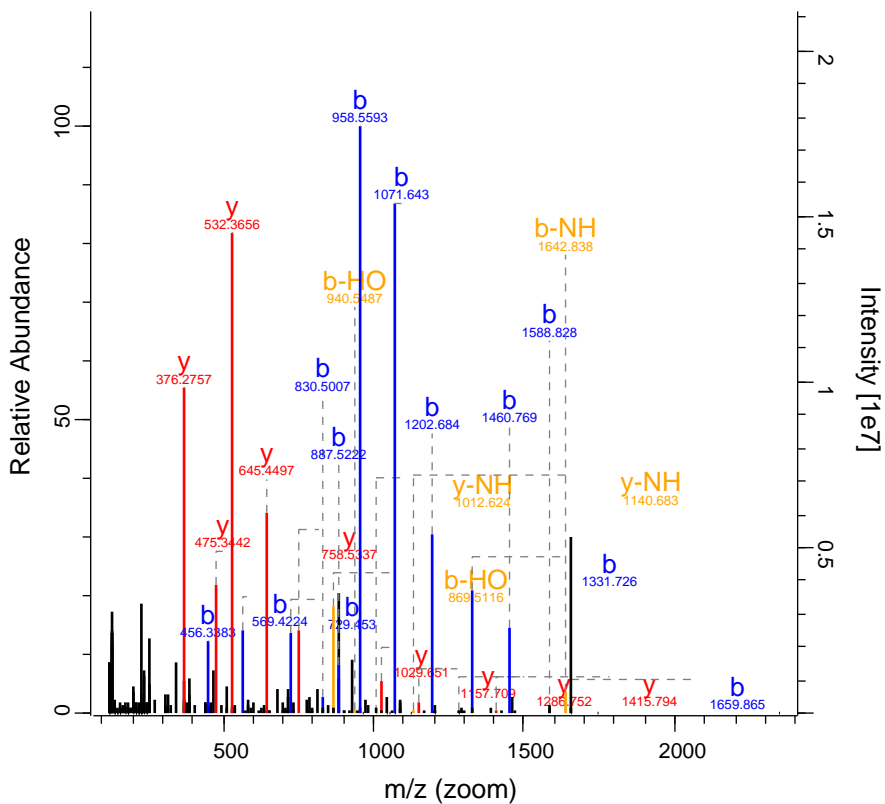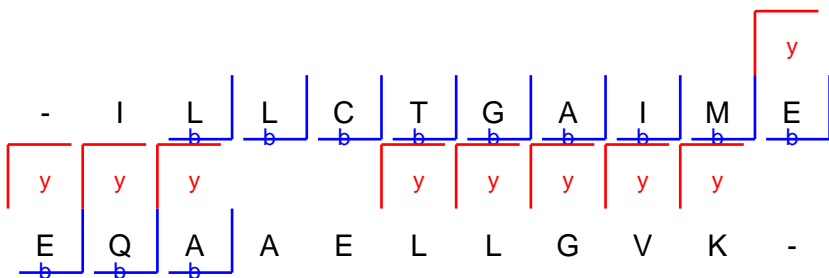

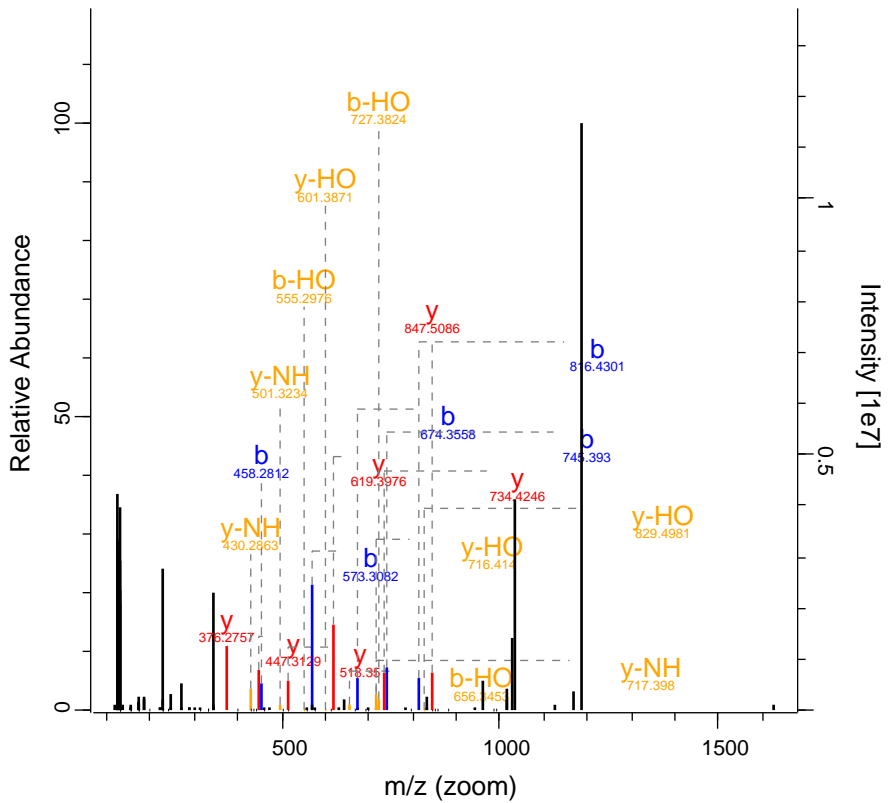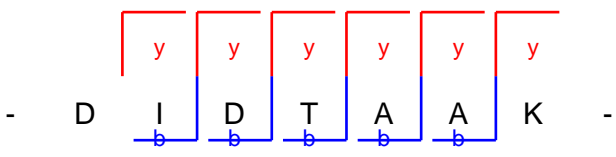

RO-QC-160121\_ZackD\_SS\_Set\_01\_Fraction 5885 FTMS; HC 149.33 876.92 GLIPR1

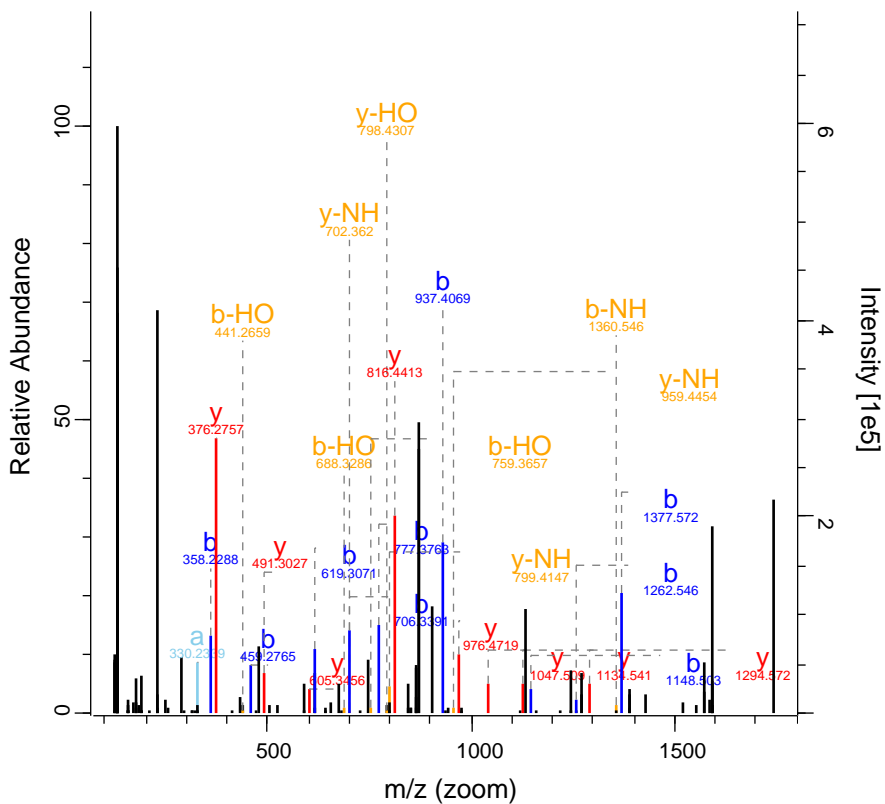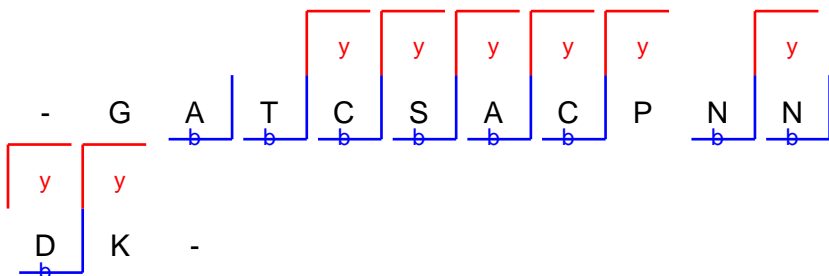

RO-QC-160121\_ZackD\_SS\_Set\_01\_Fraction 6066 FTMS; HCl 101.32 634.3 GPR125

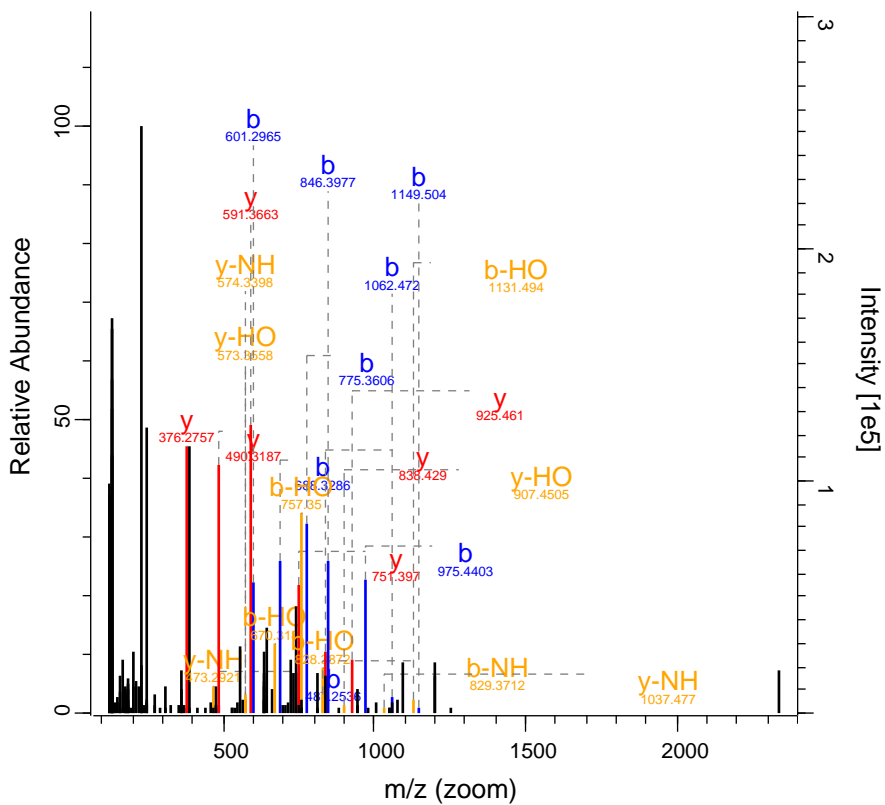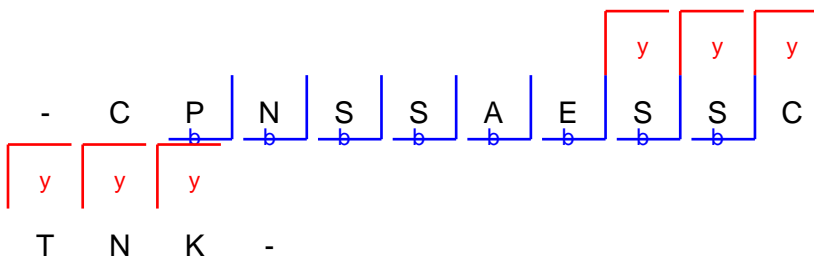

| Raw File                                | Scan | Method    | Score | m/z    |
|-----------------------------------------|------|-----------|-------|--------|
| RO-QC-160121_ZackD_SS_Set_01_Fraction_9 | 7200 | FTMS; HCD | 28.62 | 352.79 |

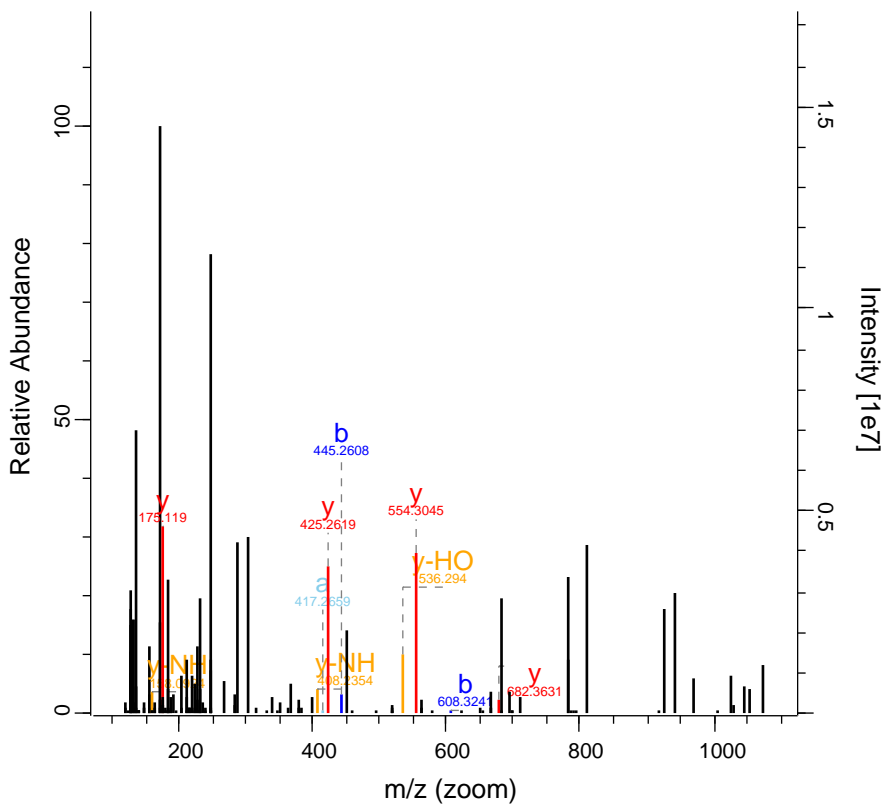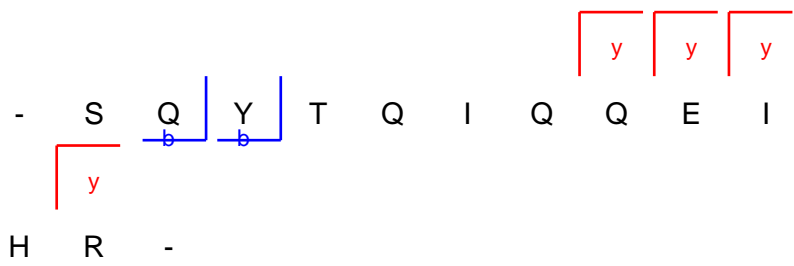

RO-QC-160121\_ZackD\_SS\_Set\_01\_Fraction 7703 FTMS; HC 202.16 796.94 ZMYM1

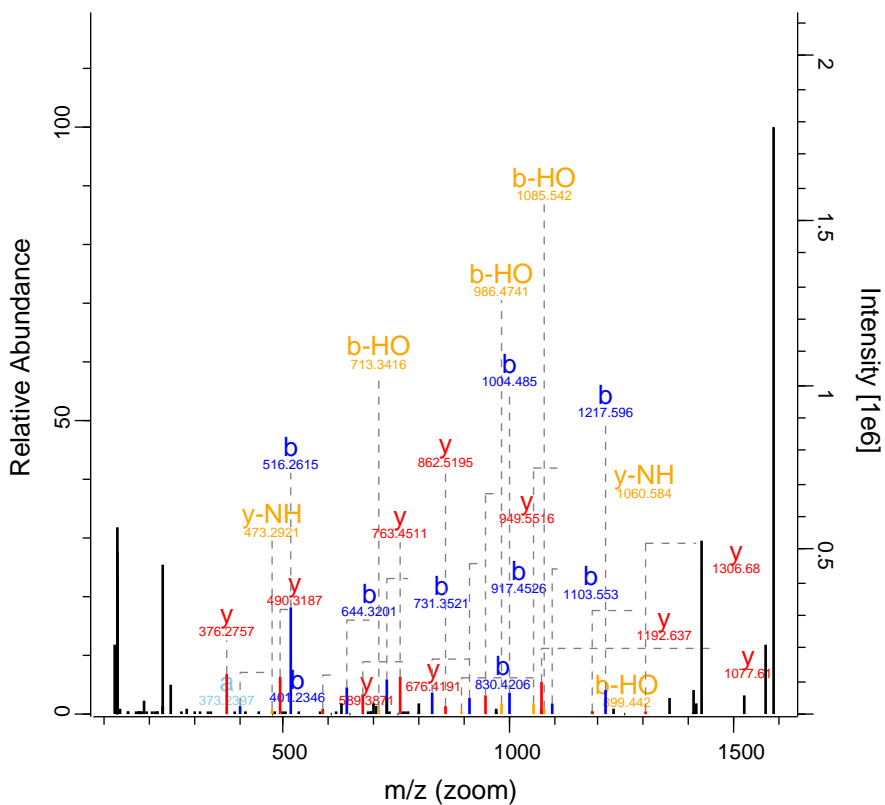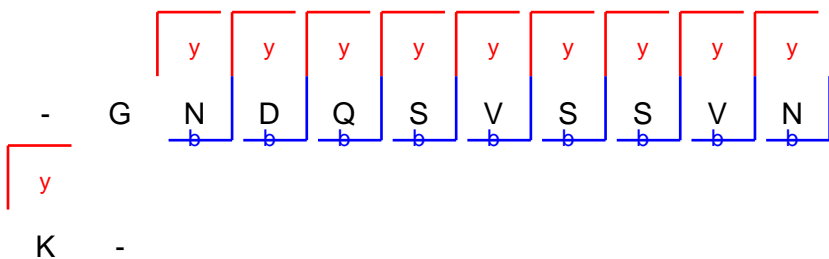

RO-QC-160121\_ZackD\_SS\_Set\_01\_Fraction 7729 FTMS; HCl 66.43 496.32 SLC35D1

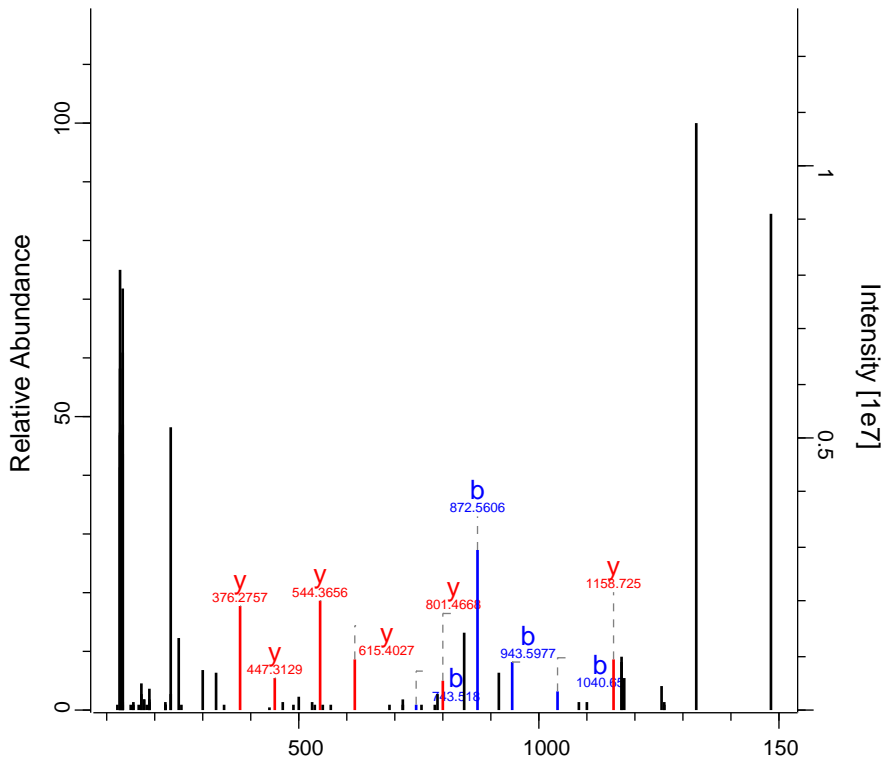

m/z (zoom)

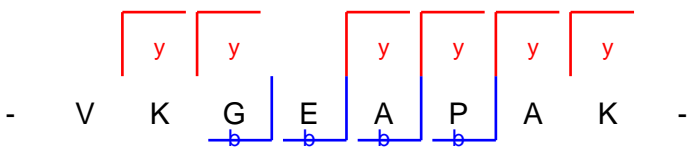



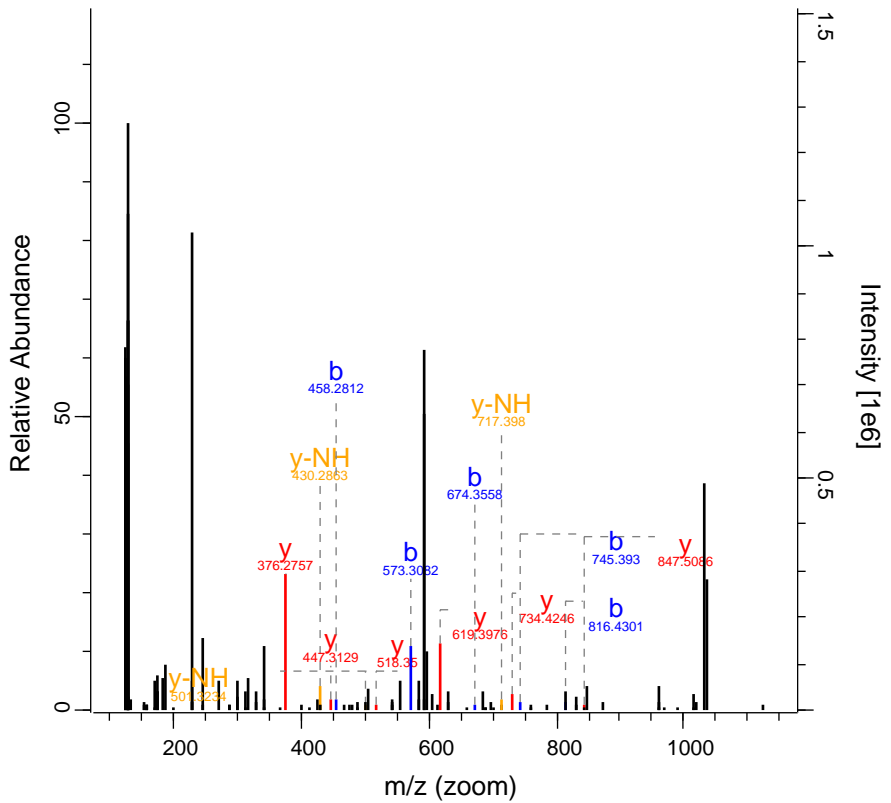

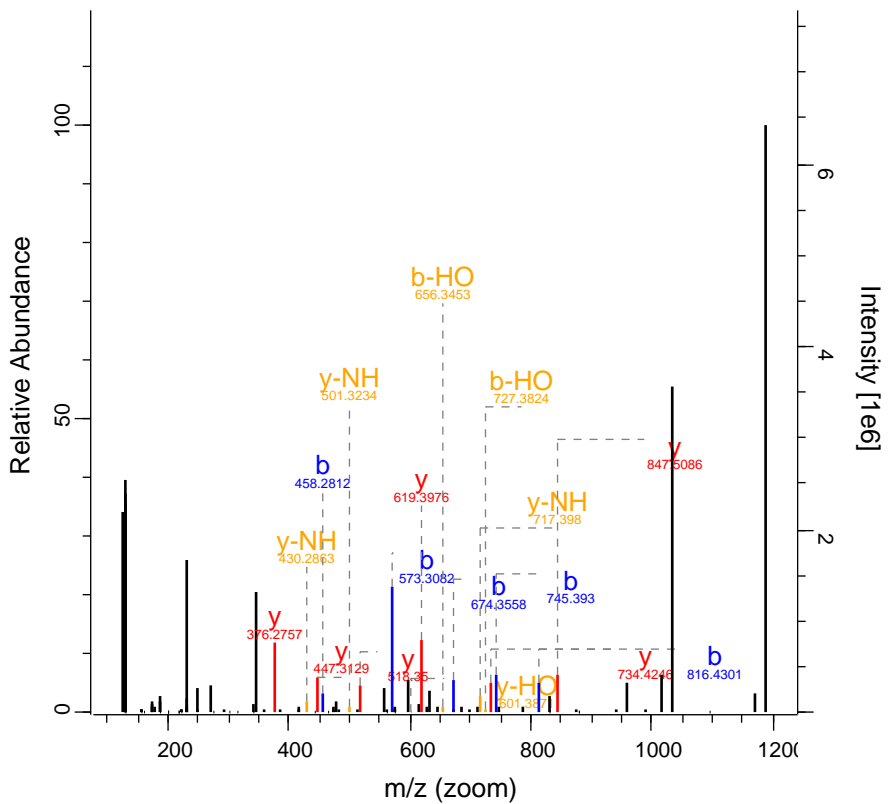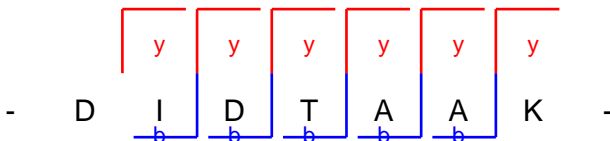

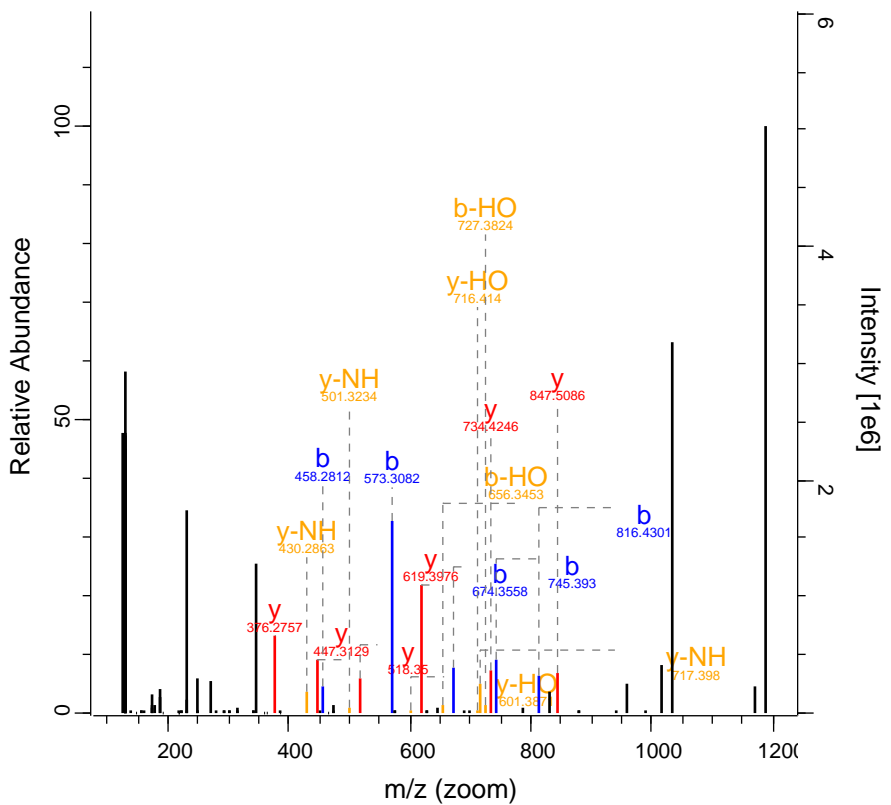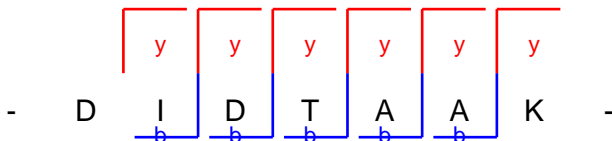

RO-QC-160121\_ZackD\_SS\_Set\_01\_Fractio 13068 FTMS; HC 117.98 744.89 APH1B

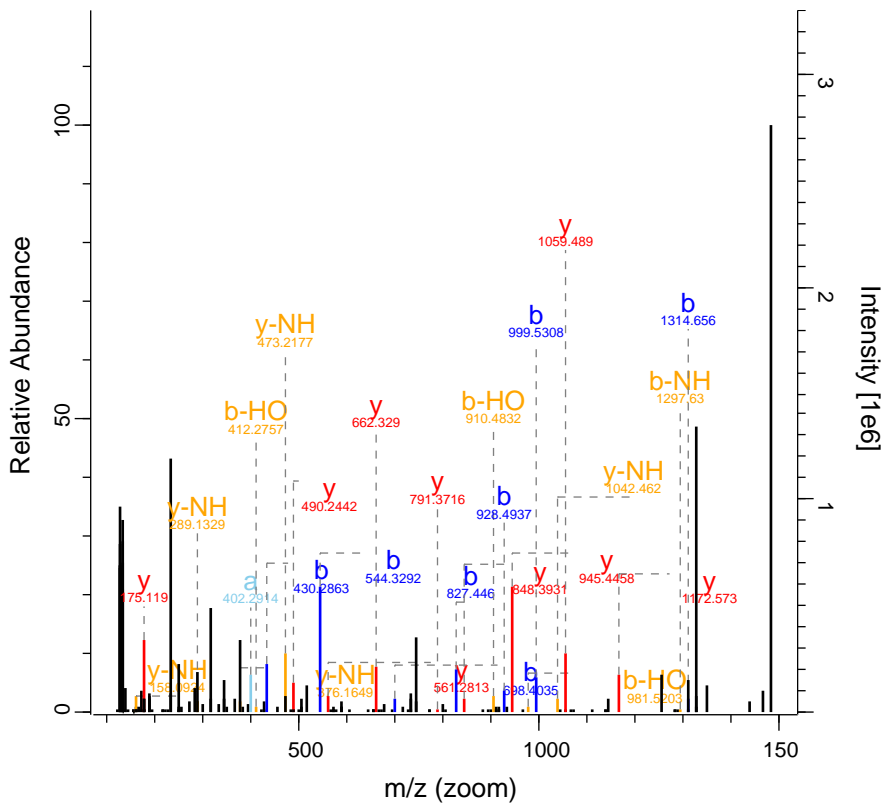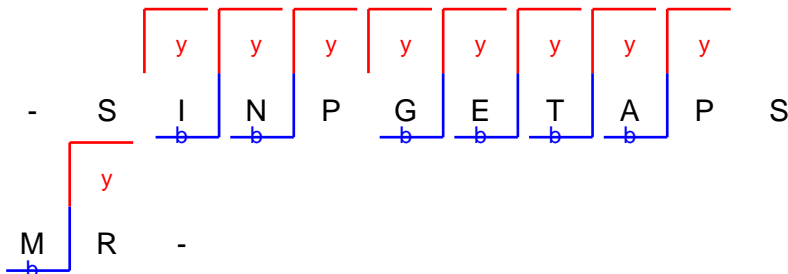



RO-QC-160121\_ZackD\_SS\_Set\_01\_Fraction 14308 FTMS; HC 170.5 719.89 CYSTM1

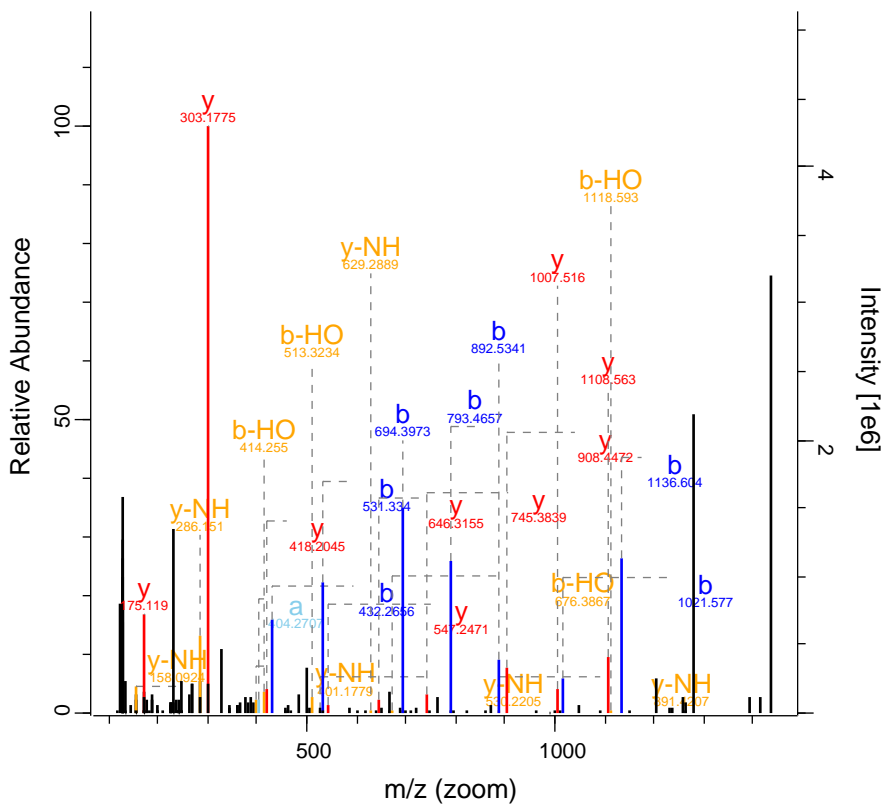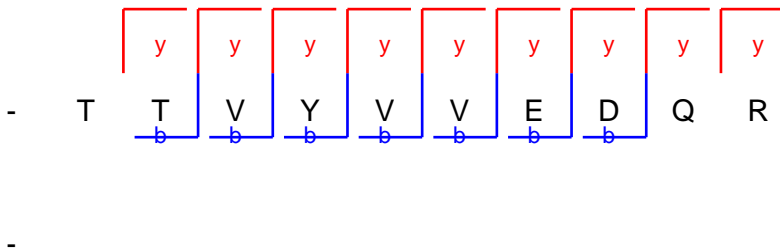

RO-QC-160121\_ZackD\_SS\_Set\_01\_Fraction 14396 FTMS; HC 89.75 709.89 FBXL19

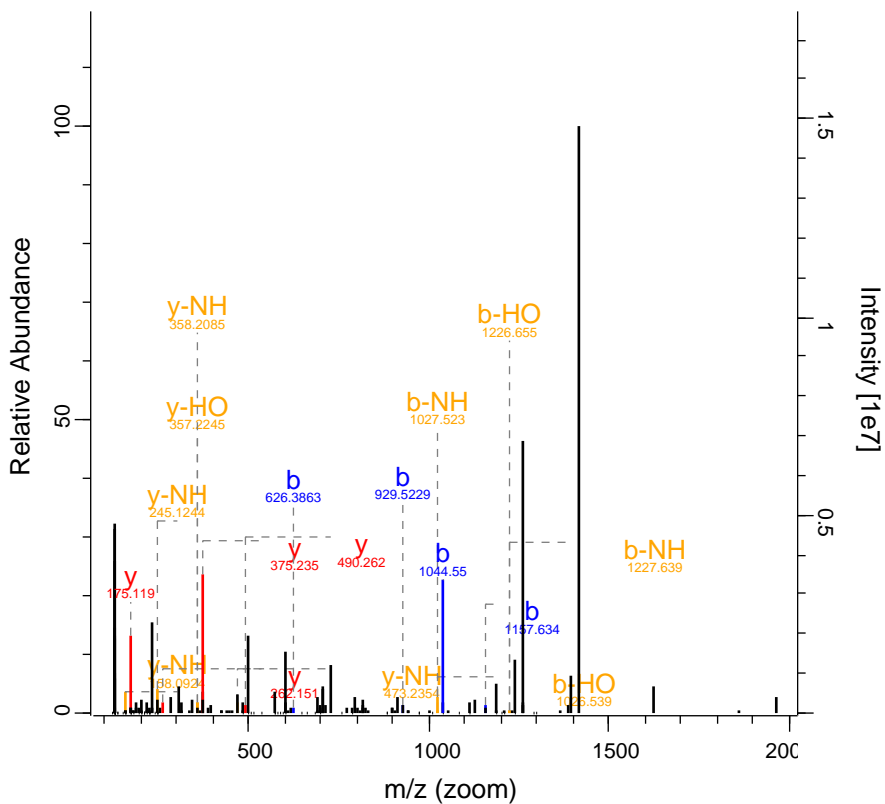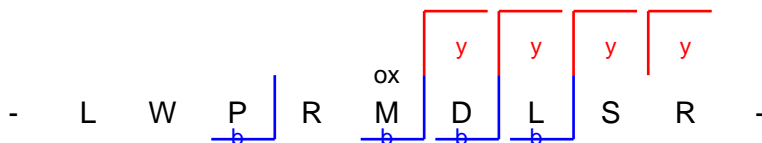

RO-QC-160121\_ZackD\_SS\_Set\_01\_Fraccio 14460 FTMS; HC 126.07 403.48 MED7

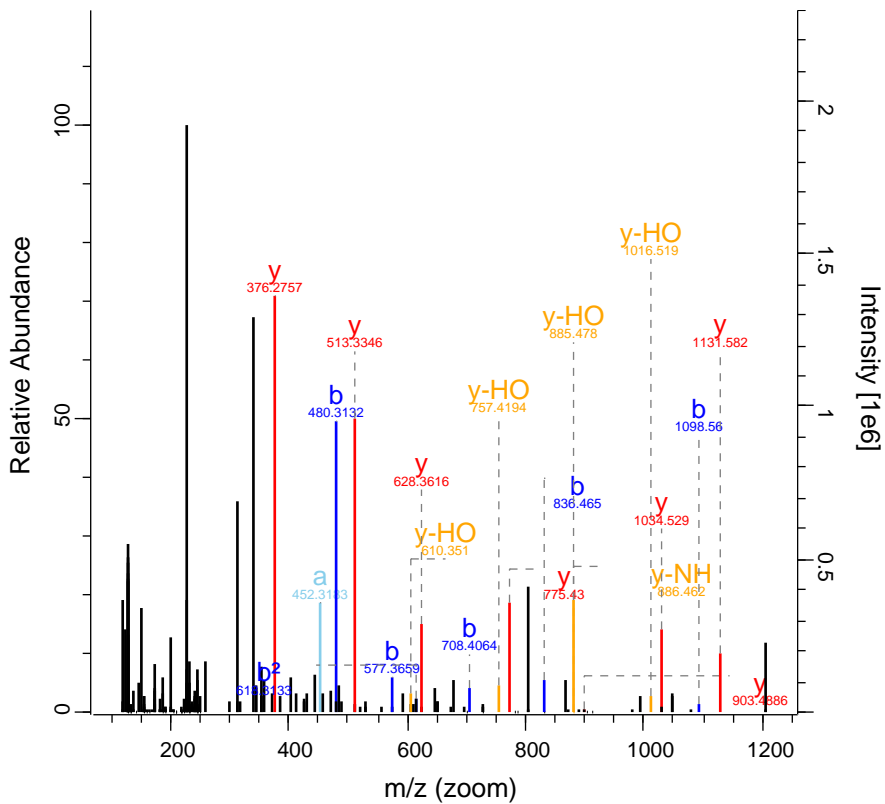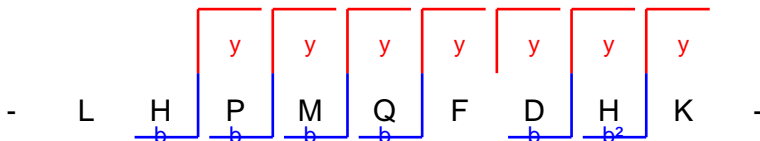



RO-QC-160121\_ZackD\_SS\_Set\_01\_Fraction 15794 FTMS; HC 45.08 714.91 POLR2F

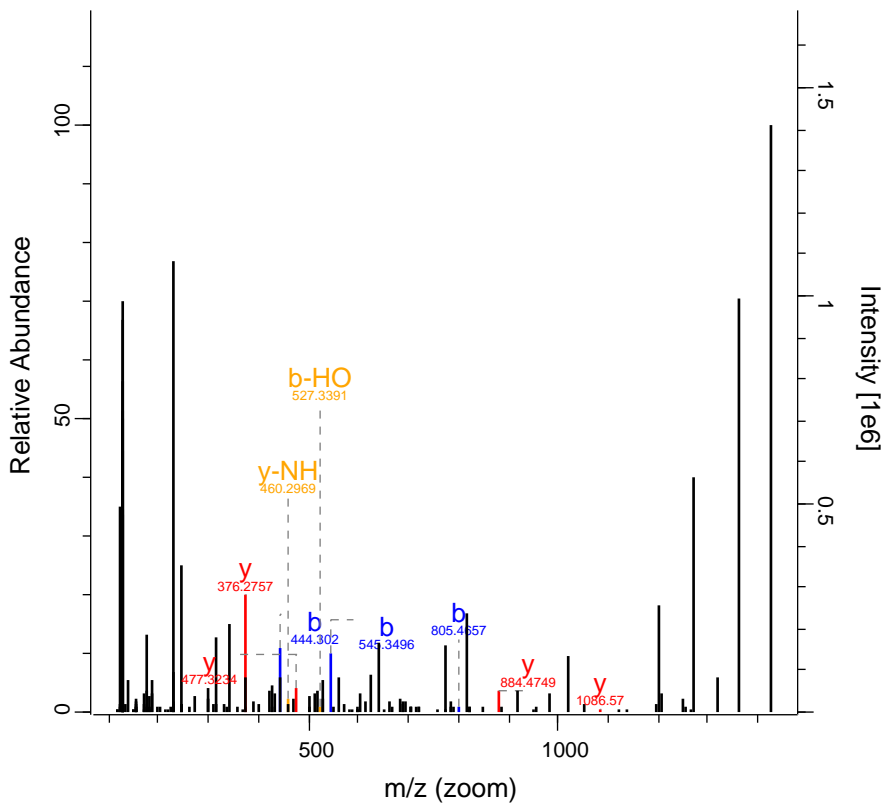

m/z (zoom)

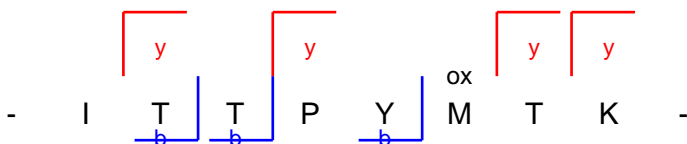

RO-QC-160121\_ZackD\_SS\_Set\_01\_Fractio 16146 FTMS; HC 136.57 463.31 TMC1

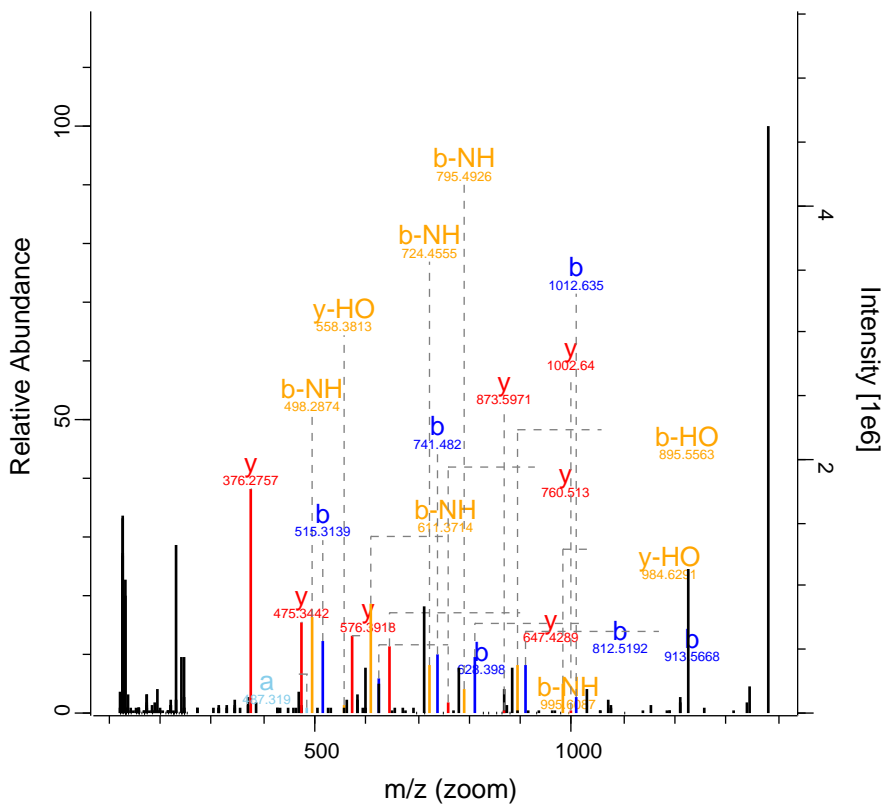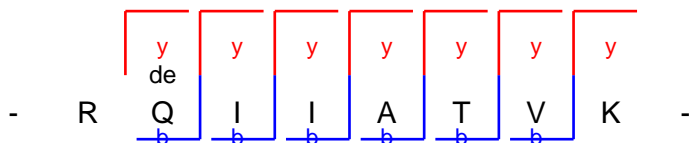

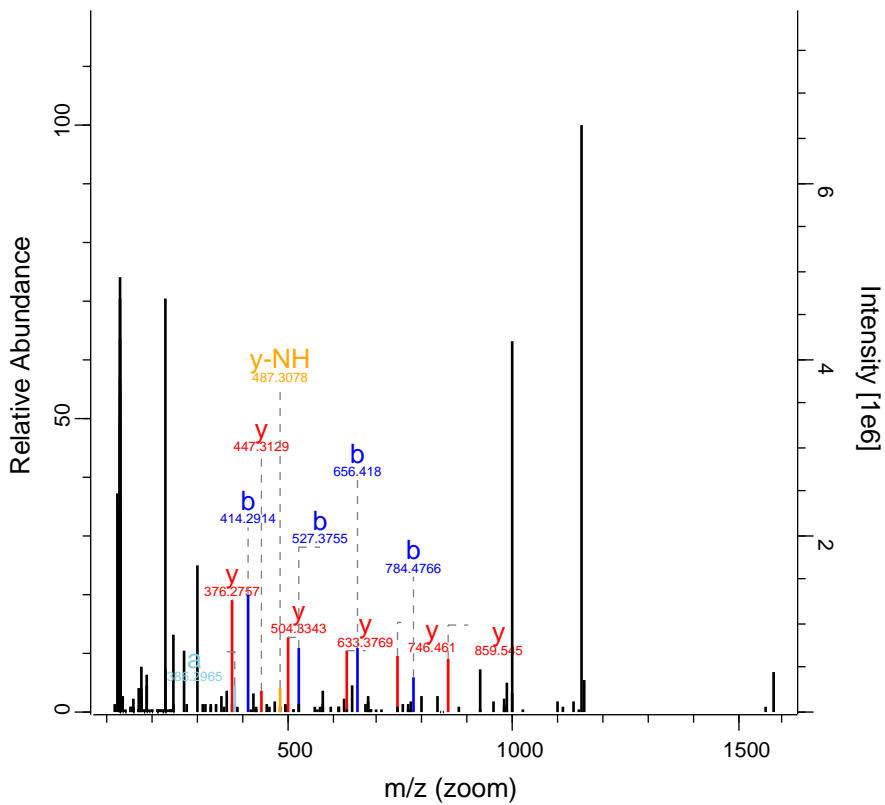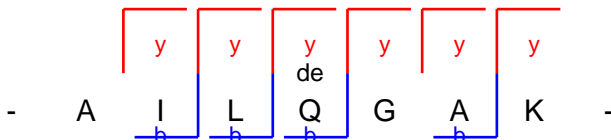

RO-QC-160121\_ZackD\_SS\_Set\_01\_Fractio 17301 FTMS; HC 113.88 778.72 F2R

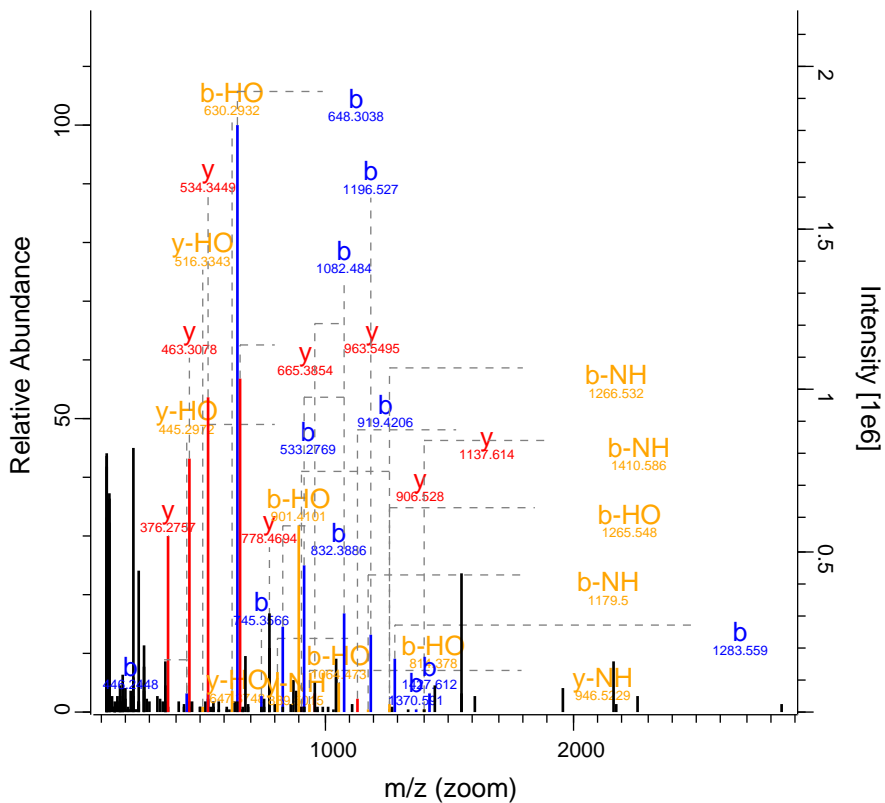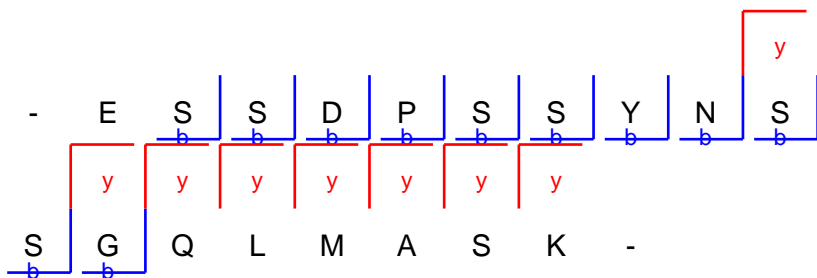

RO-QC-160121\_ZackD\_SS\_Set\_01\_Fraction 18587 FTMS; HC 50.04 640.86 PROK2

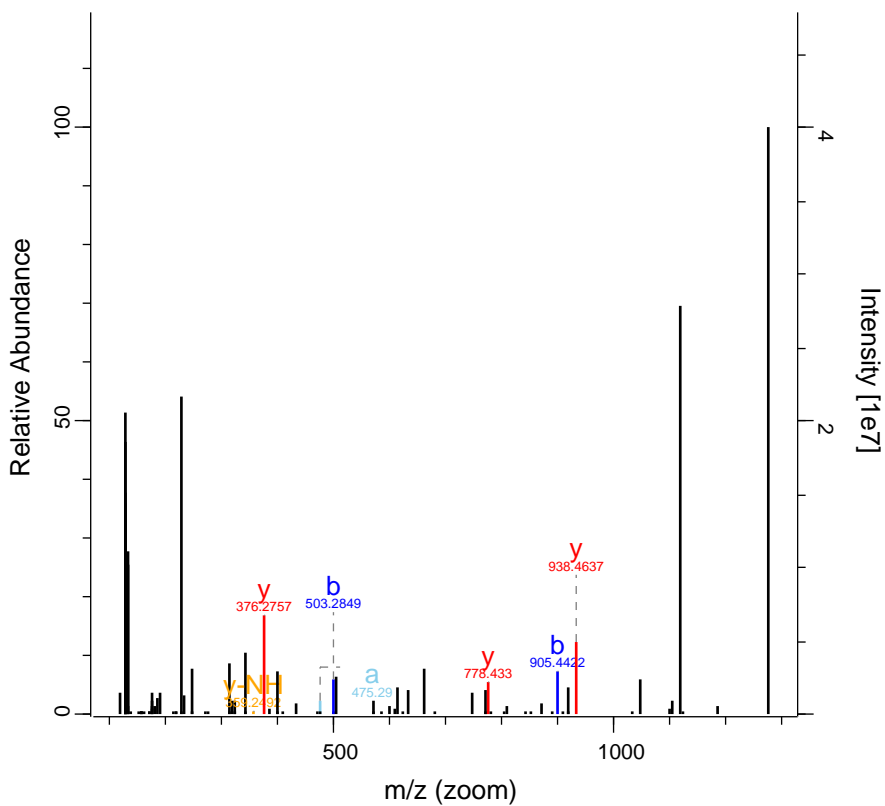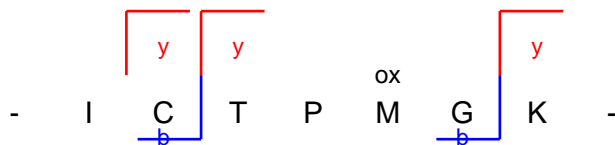

RO-QC-160121\_ZackD\_SS\_Set\_01\_Fraction 18840 FTMS; HC 50.04 640.86 PROK2

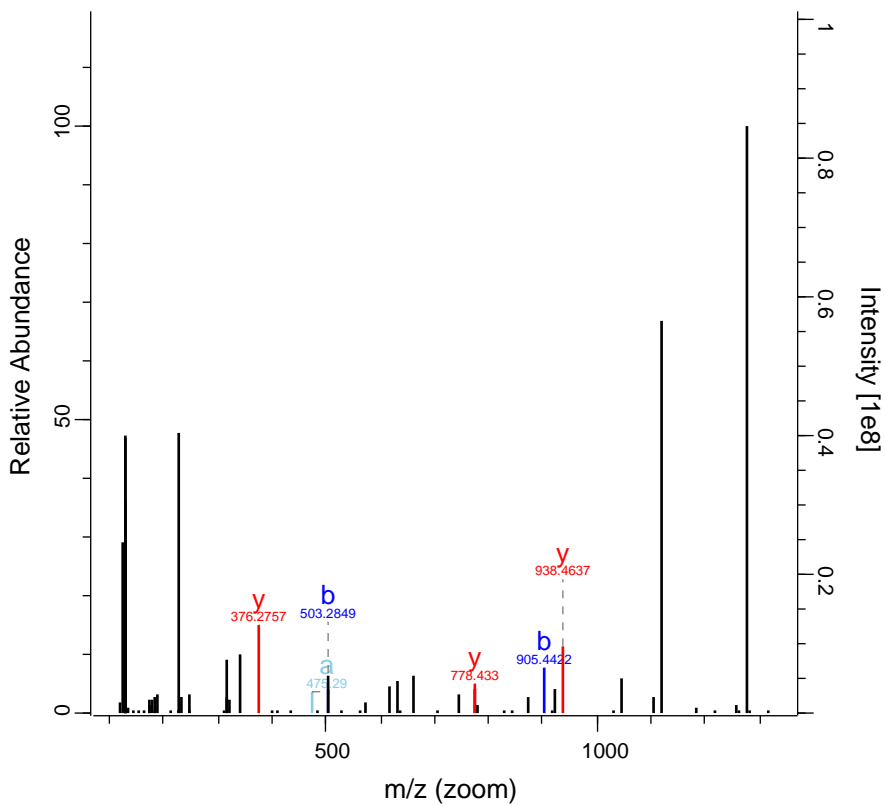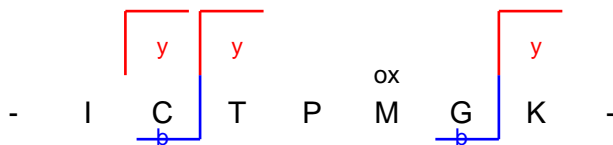

RO-QC-160121\_ZackD\_SS\_Set\_01\_Fractio 18972 FTMS; HC 130.94 737.93 SLC29A3

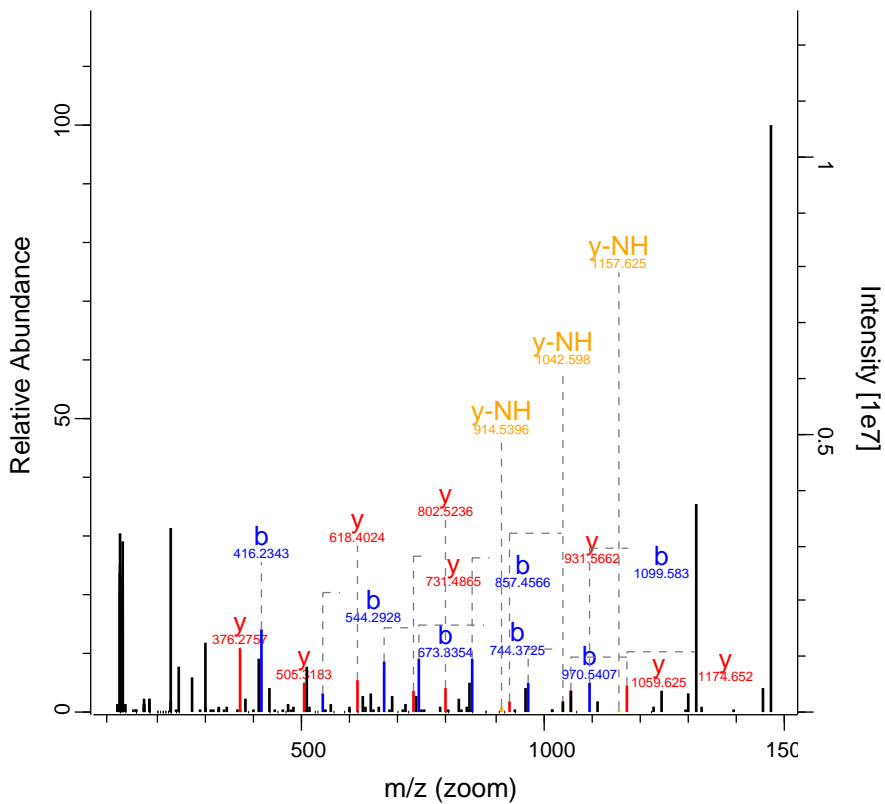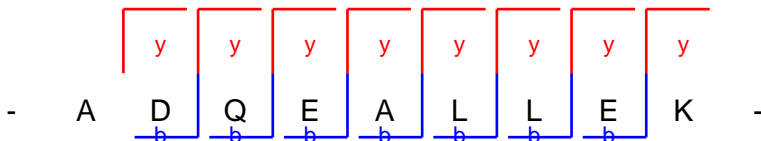

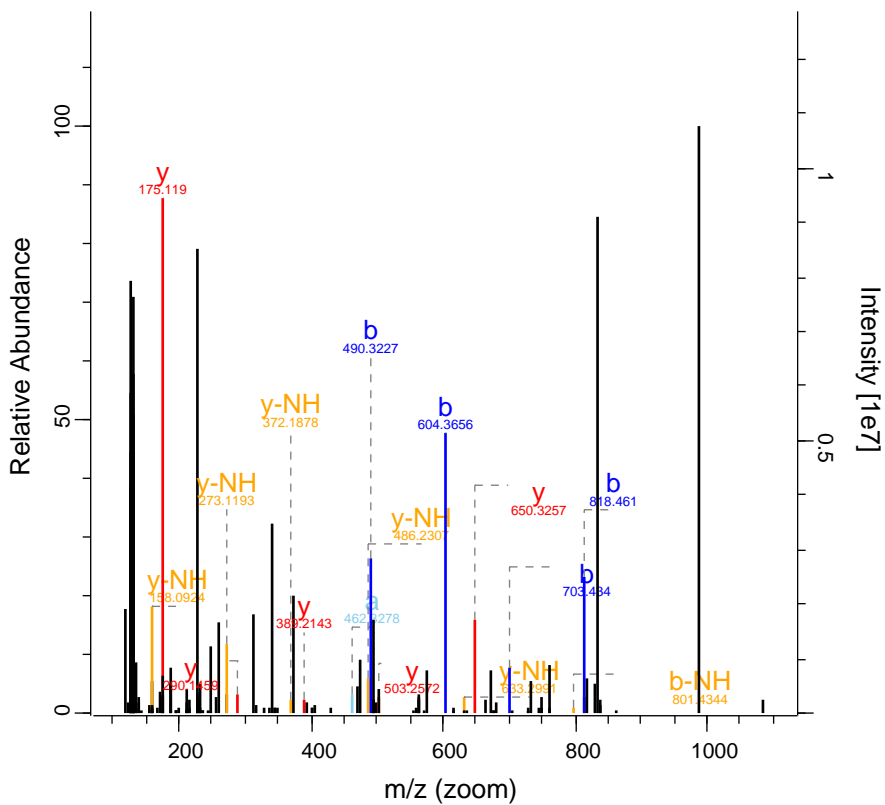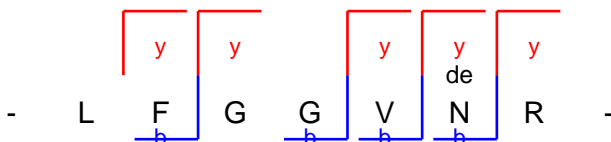



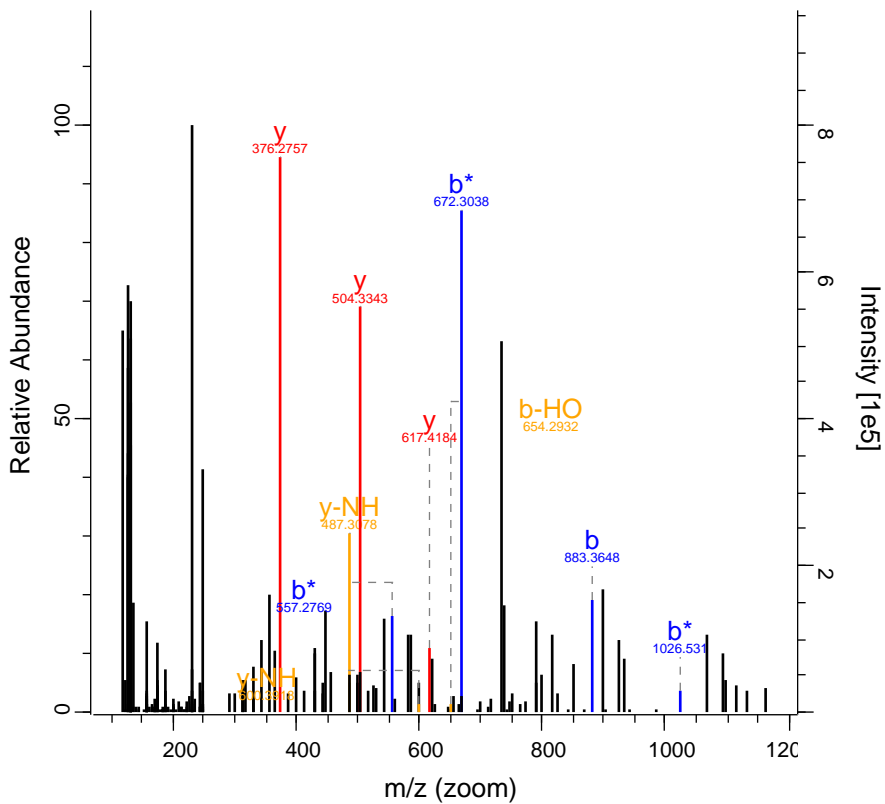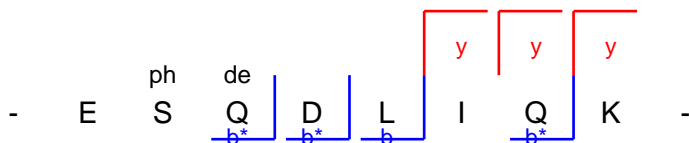

RO-QC-160121\_ZackD\_SS\_Set\_01\_Fraction 20386 FTMS; HC 67.15 451.51 TMCC2

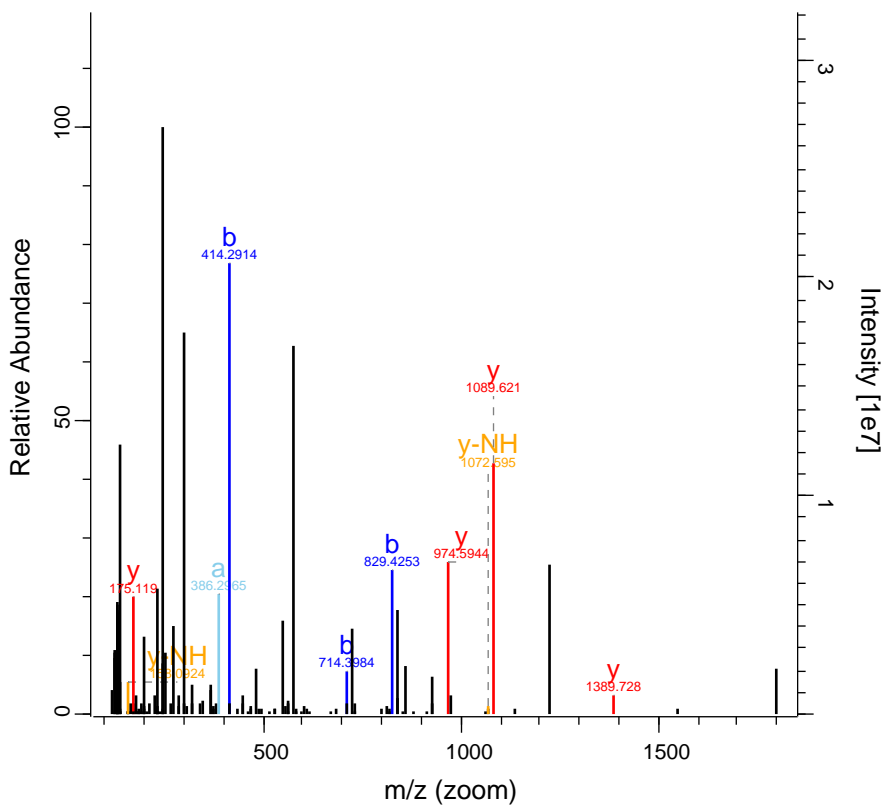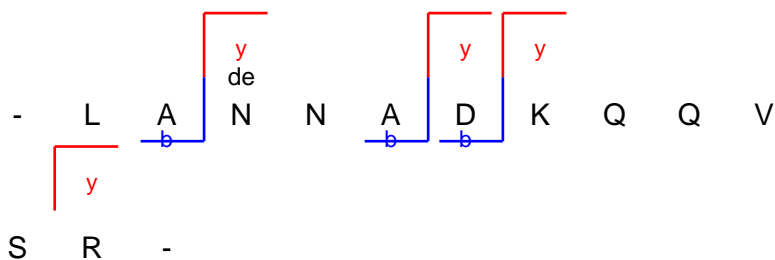



RO-QC-160121\_ZackD\_SS\_Set\_01\_Fraction 21591 FTMS; HC 81.87 516.65 FAM53C

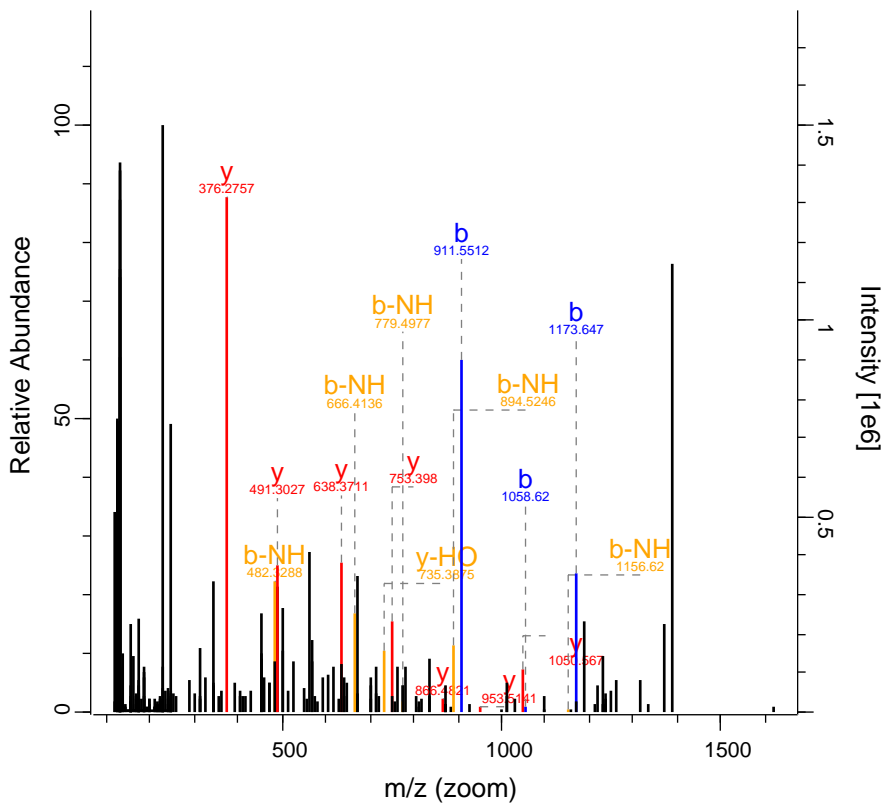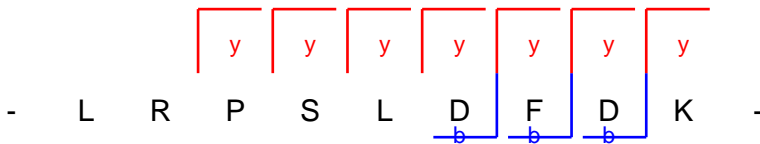

RO-QC-160121\_ZackD\_SS\_Set\_01\_Fraction 22593 FTMS; HC 43.08 498.54 FLG2

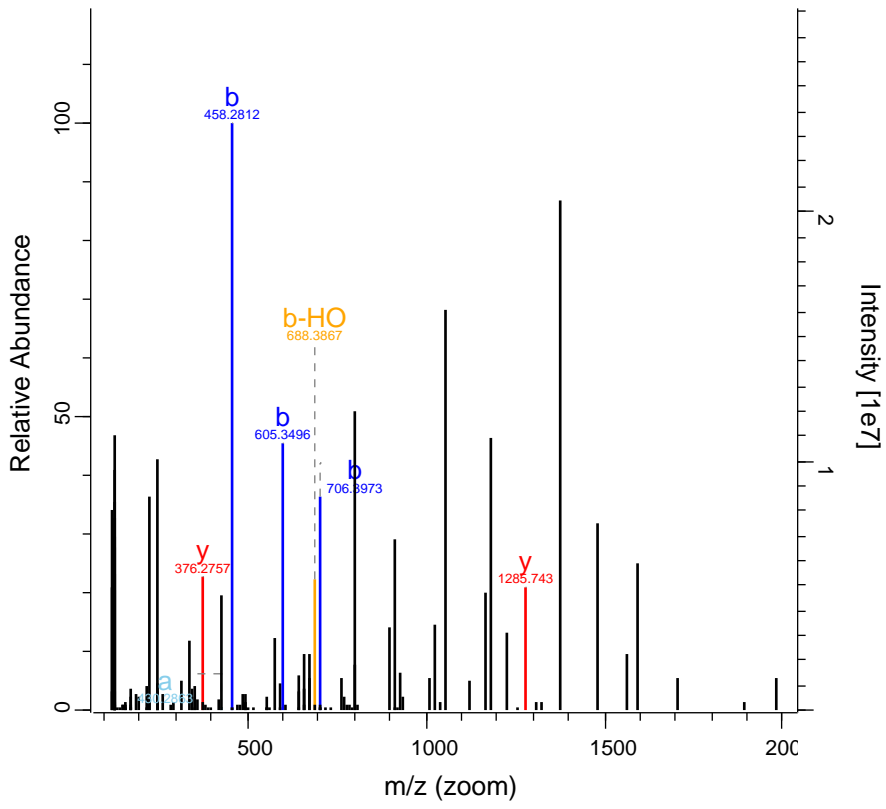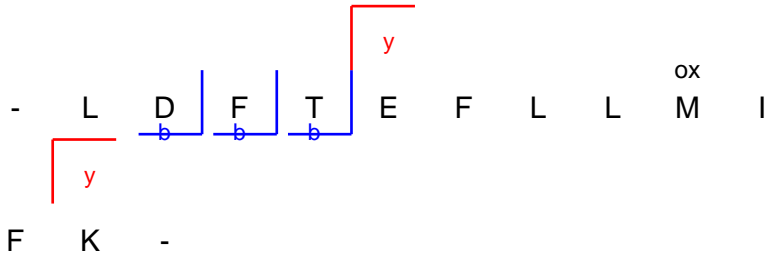

RO-QC-160121\_ZackD\_SS\_Set\_01\_Fraction 22764 FTMS; HC 65.88 751.42 EMC6

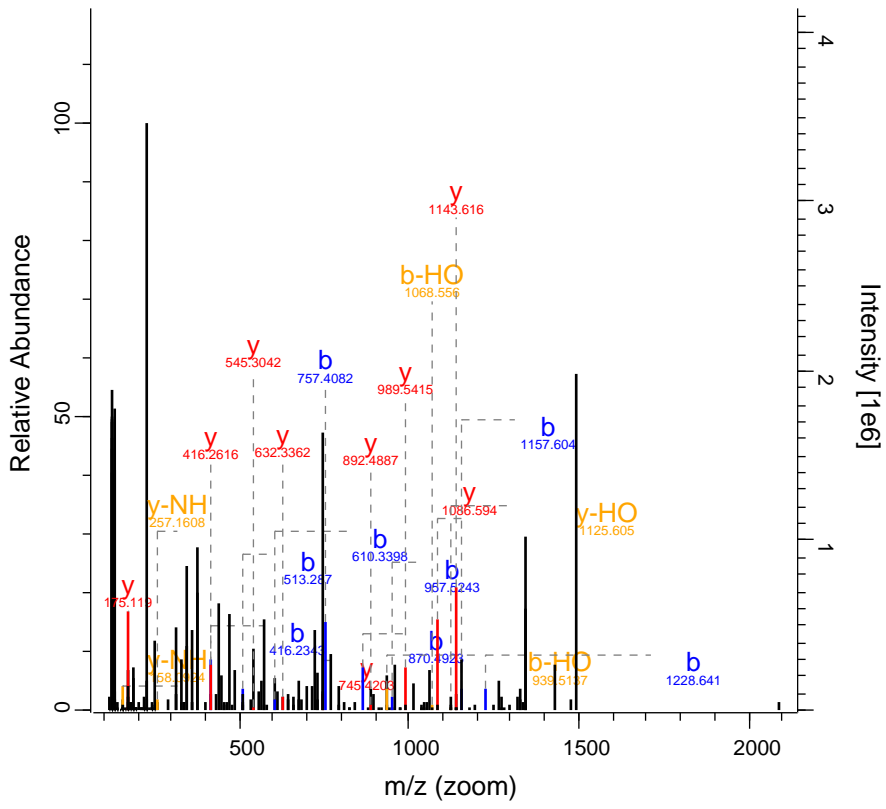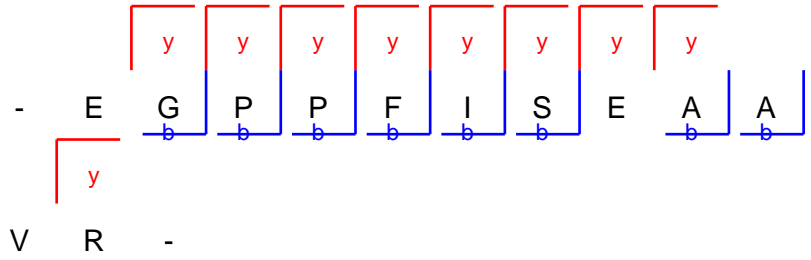

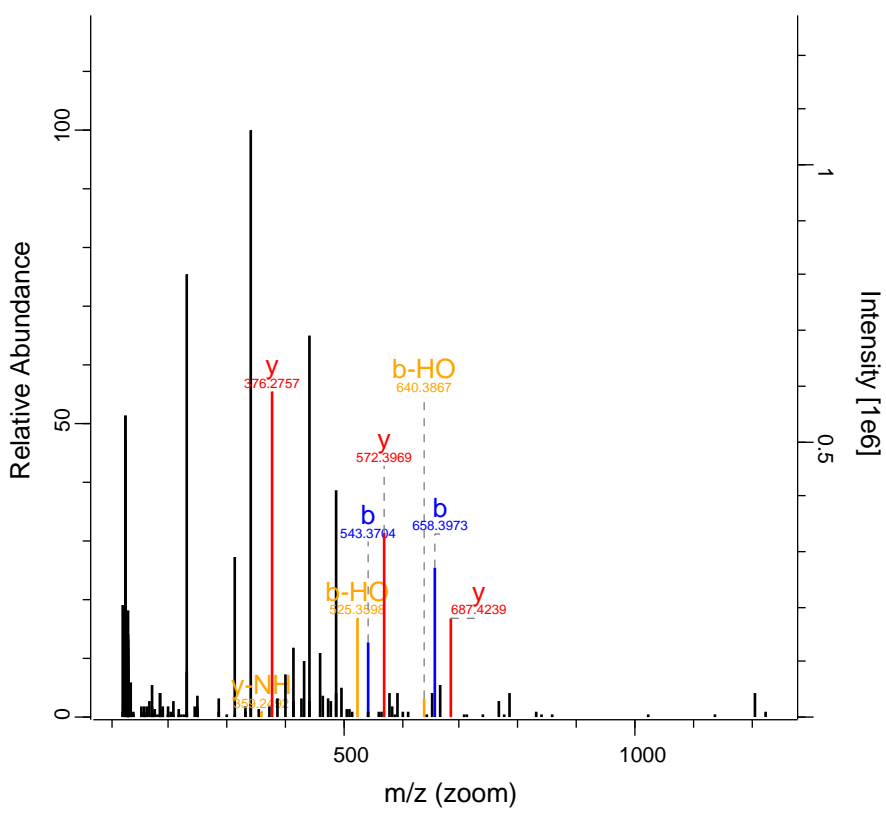

m/z (zoom)

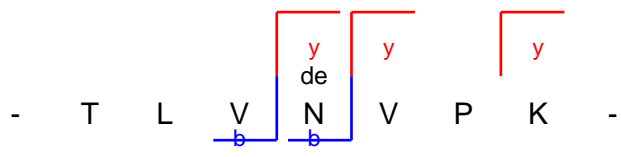

RO-QC-160121\_ZackD\_SS\_Set\_01\_Fractic 23306 FTMS; HC 54.78 1219.65 CELA2A

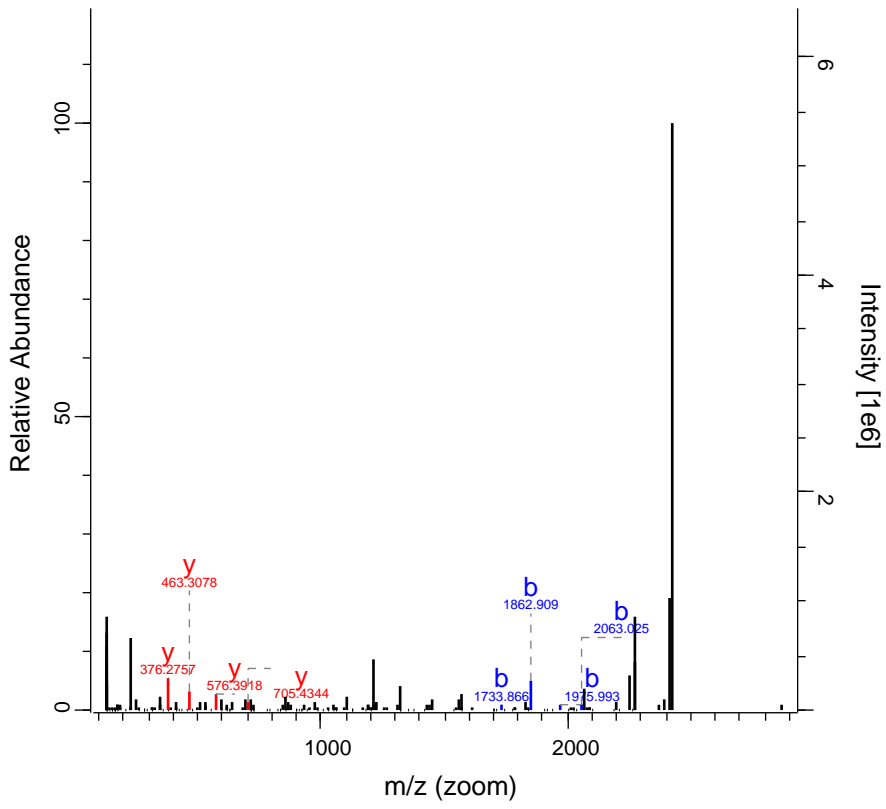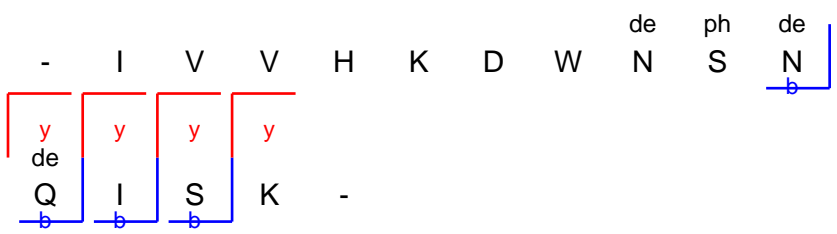



RO-QC-160121\_ZackD\_SS\_Set\_01\_Fraction 23321 FTMS; HC 69.82 829.49 RTTN

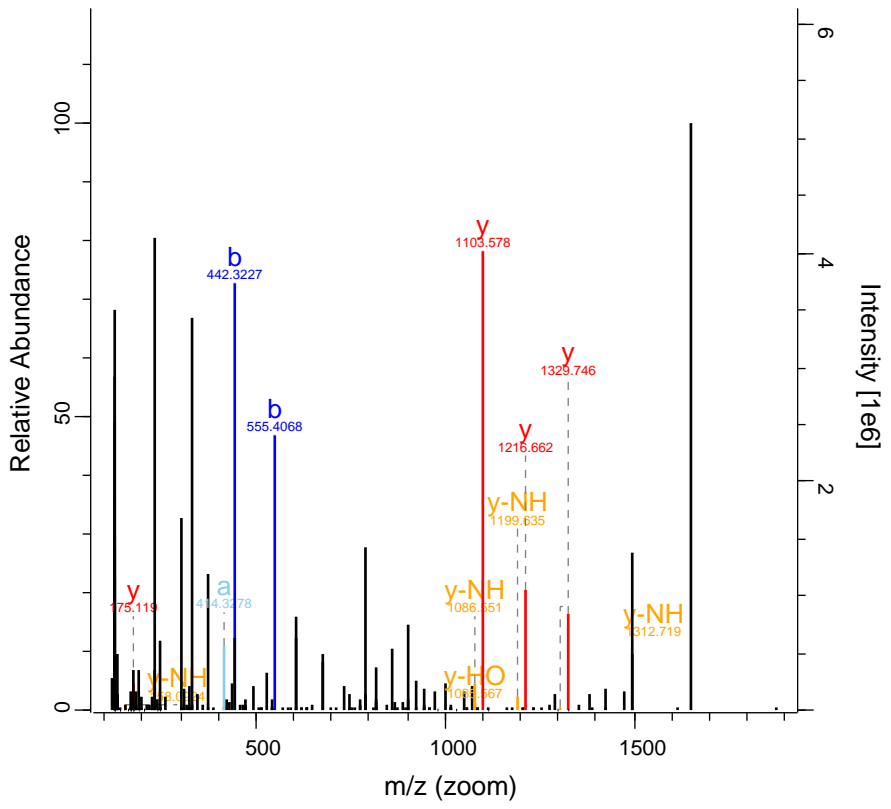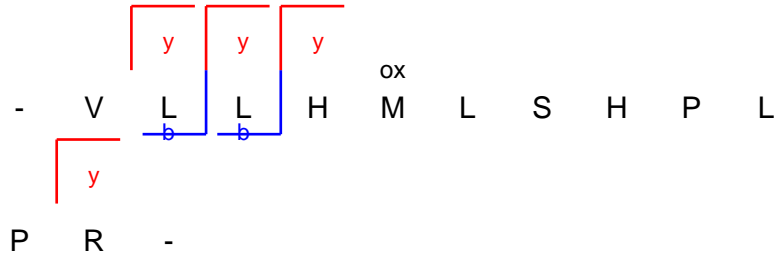

RO-QC-160121\_ZackD\_SS\_Set\_01\_Fractic 24192 FTMS; HC 53.25 1460.32 NPAT

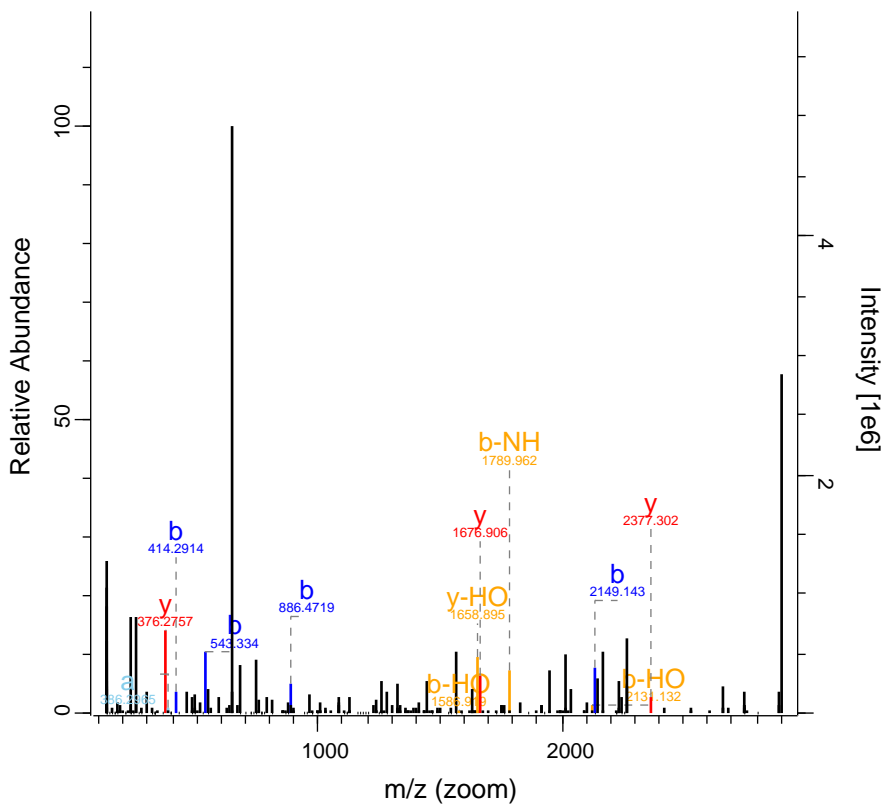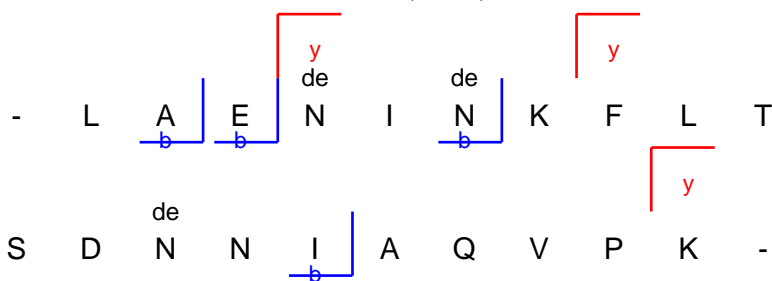

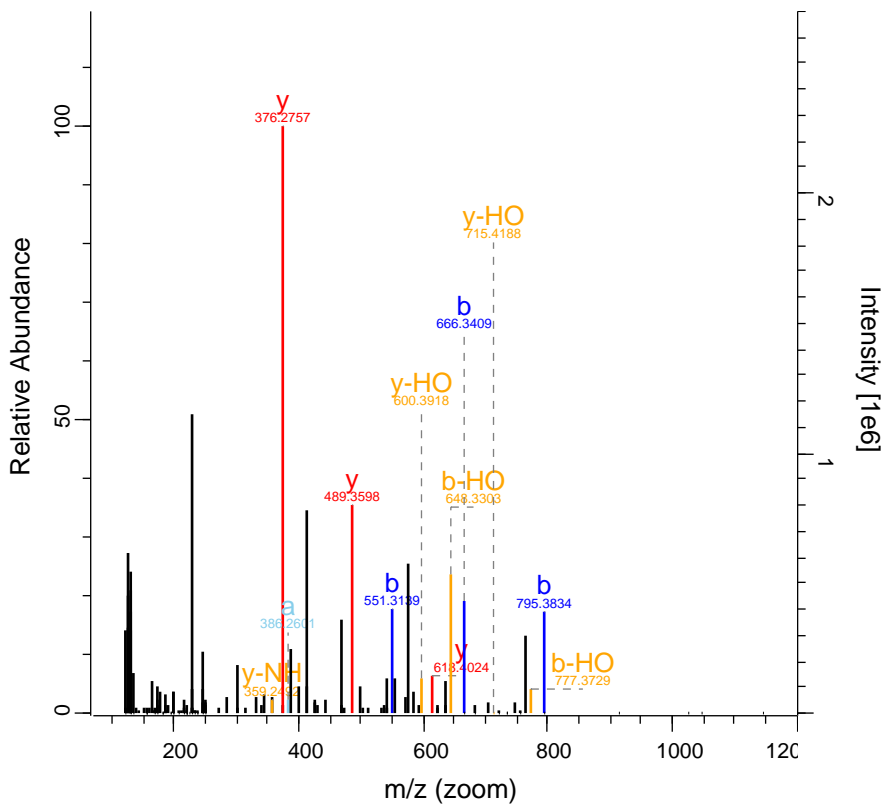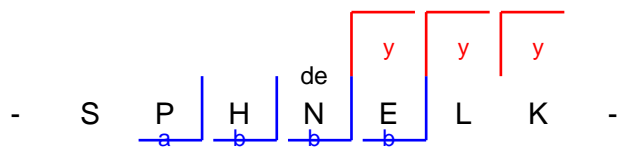

RO-QC-160121\_ZackD\_SS\_Set\_01\_Fractio 25444 FTMS; HC 121.05 649.89 EBP

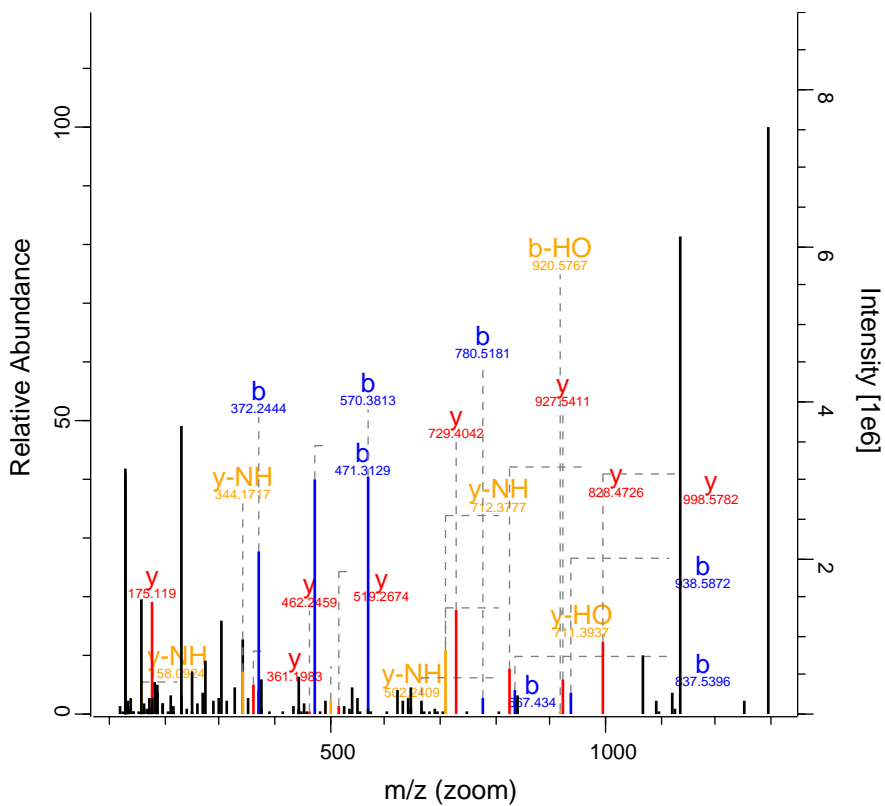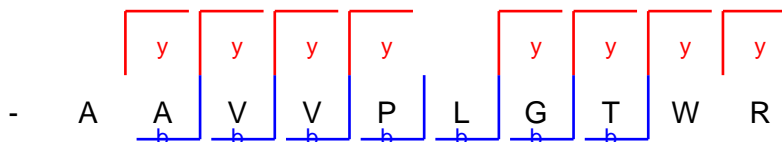

RO-QC-160121\_ZackD\_SS\_Set\_01\_Fraction 25446 FTMS; HC 93.11 984.04 CLEC4M

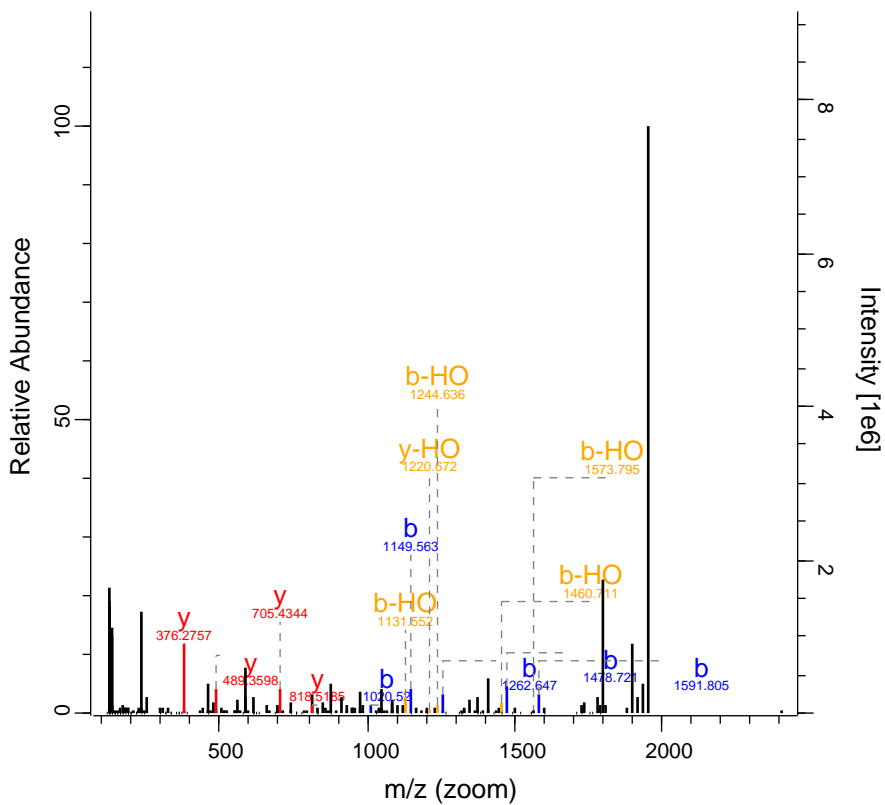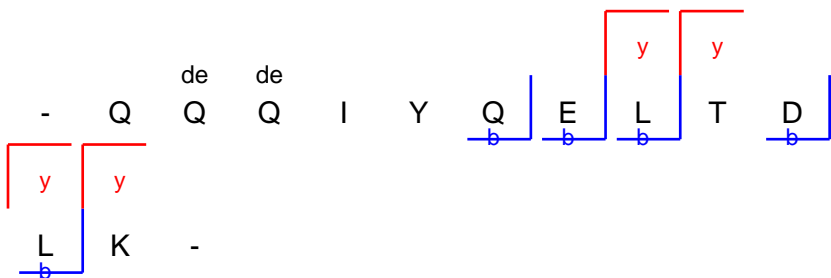

RO-QC-160121\_ZackD\_SS\_Set\_01\_Fraction 26615 FTMS; HC 86.54 892.82 CASP6

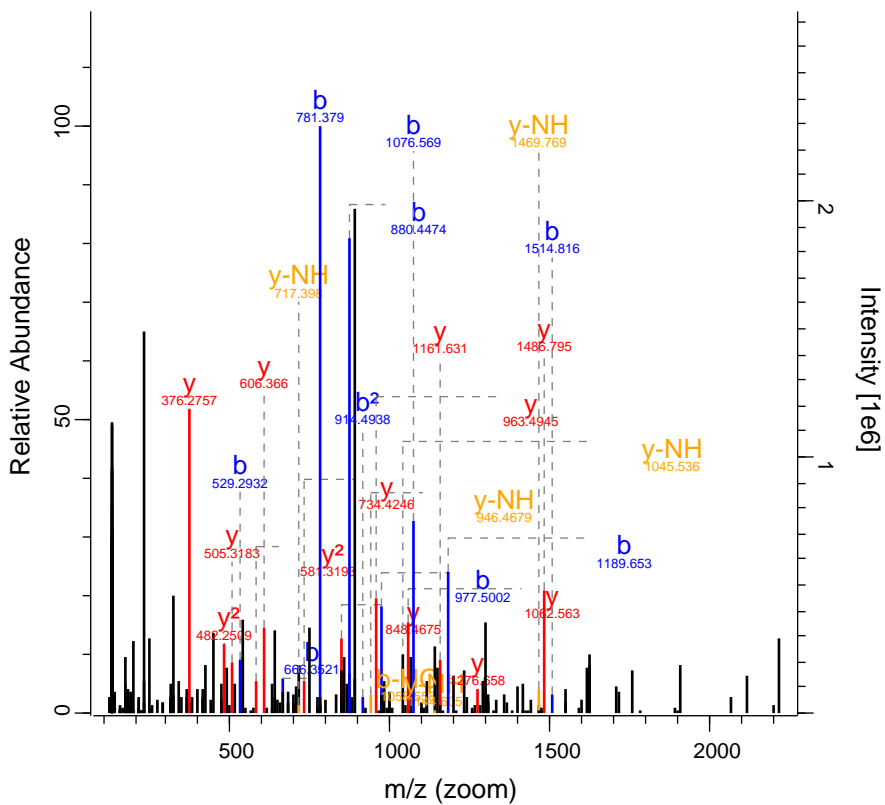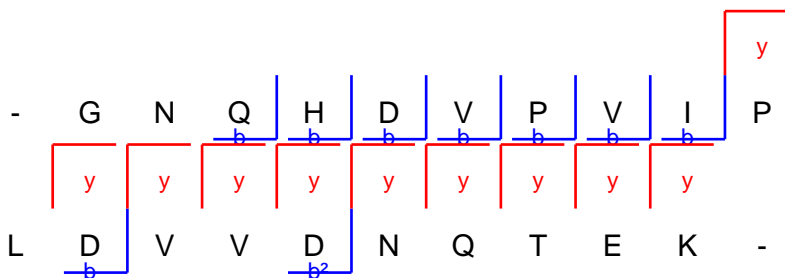

RO-QC-160121\_ZackD\_SS\_Set\_01\_Fractic 26666 FTMS; HC 48.64 1237.69 LRRC66

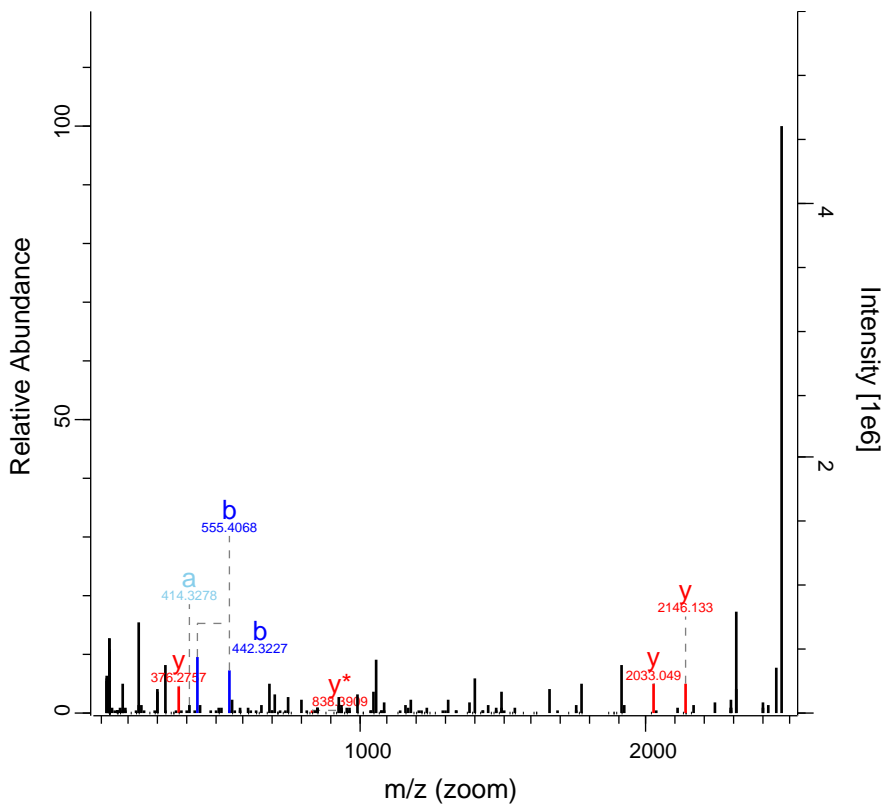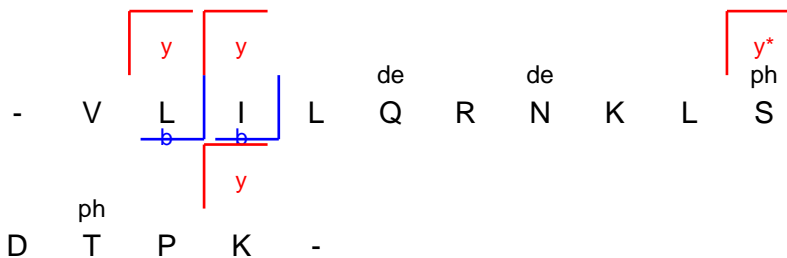

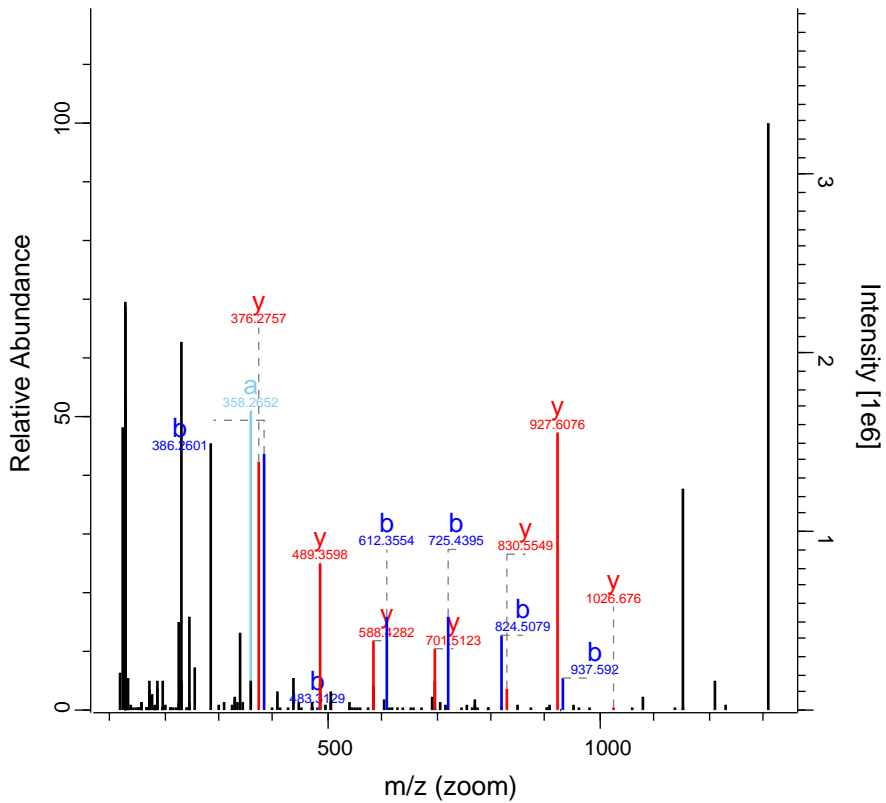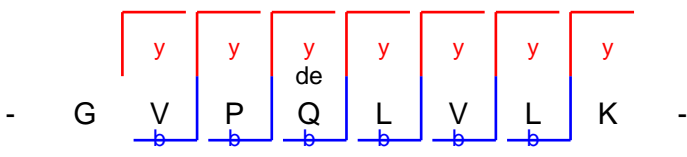



RO-QC-160121\_ZackD\_SS\_Set\_01\_Fractic 27234 FTMS; HC 46.61 1237.69 LRRC66

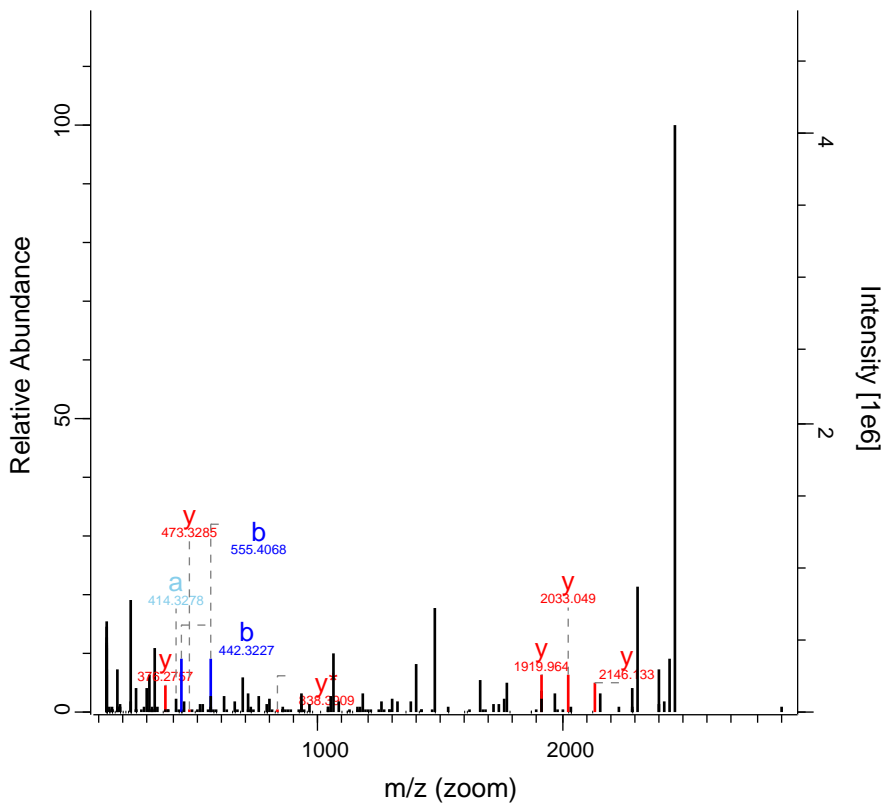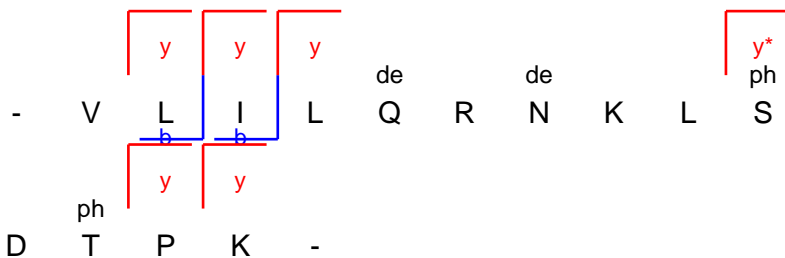

D T P K -





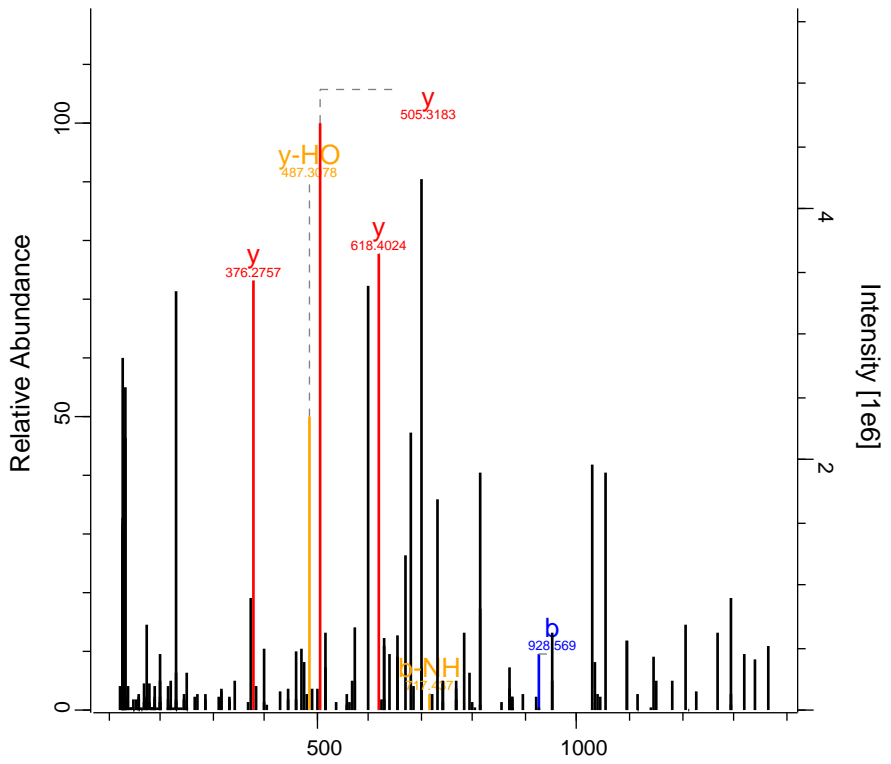

m/z (zoom)

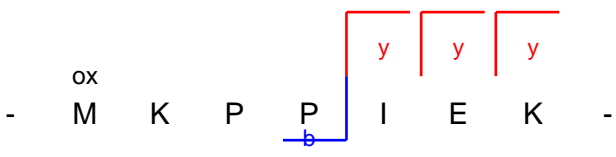

RO-QC-160121\_ZackD\_SS\_Set\_01\_Fraction27960 FTMS; HC 59.87 592.33 ATP6V0C

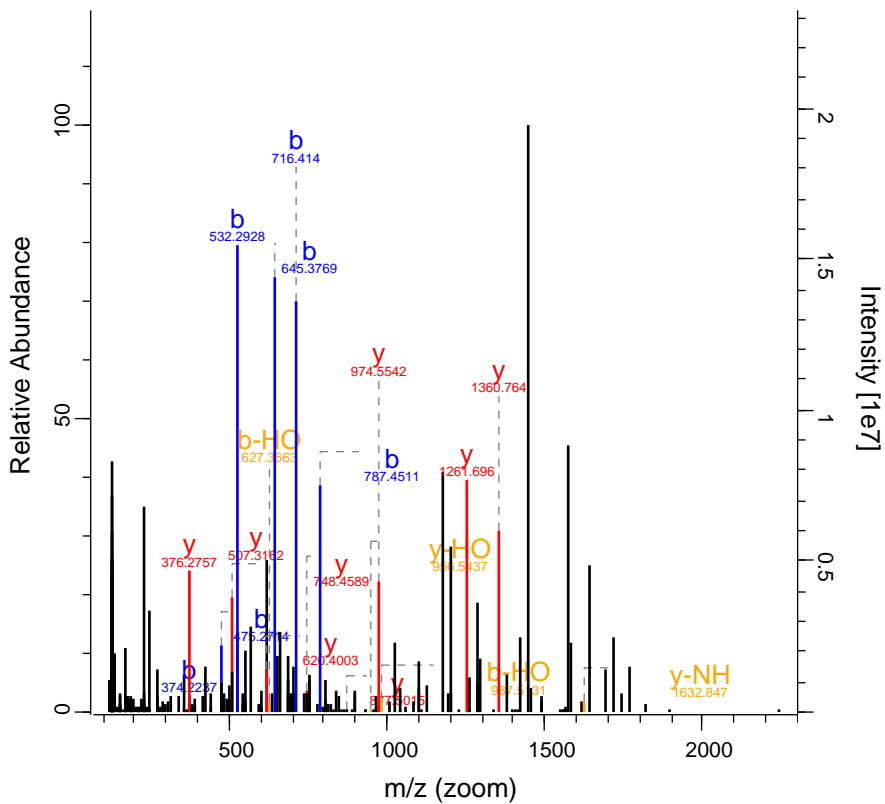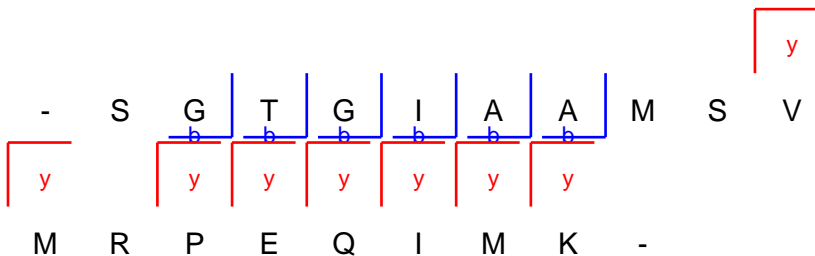



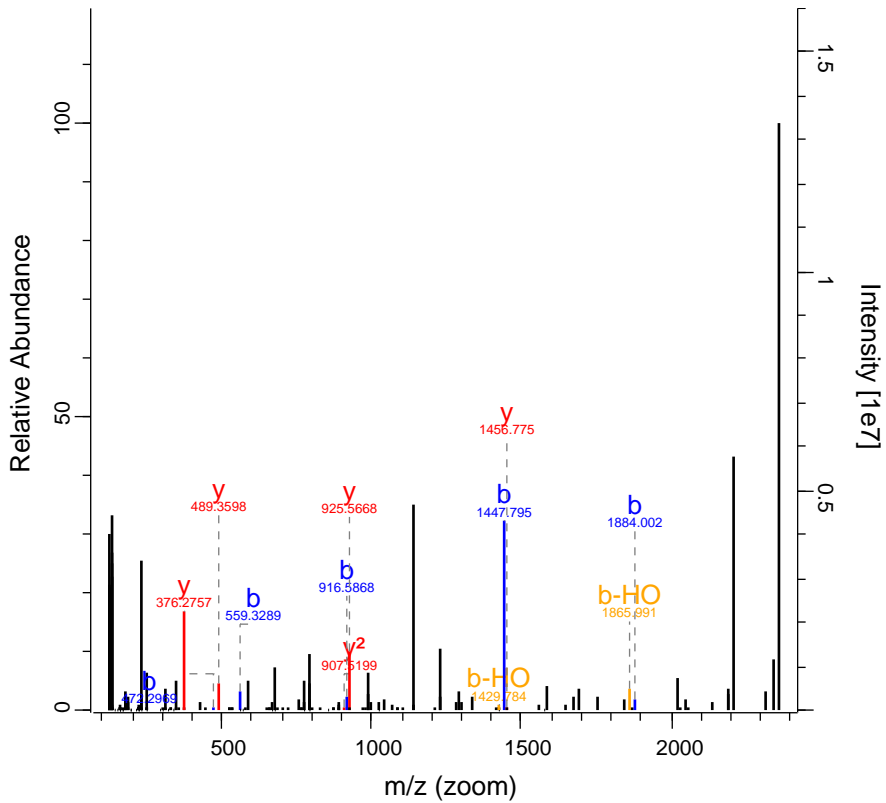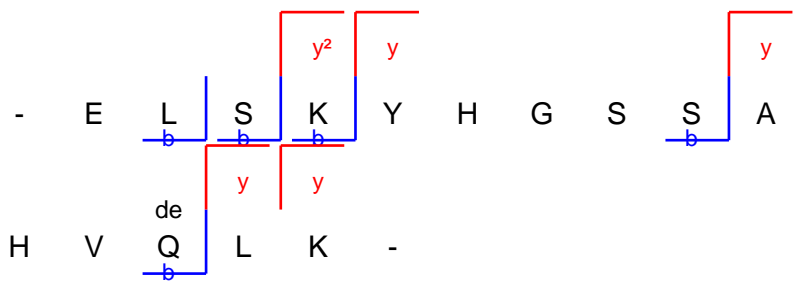

RO-QC-160121\_ZackD\_SS\_Set\_01\_Fraction 28437 FTMS; HC 90.4 944.98 COX6A1

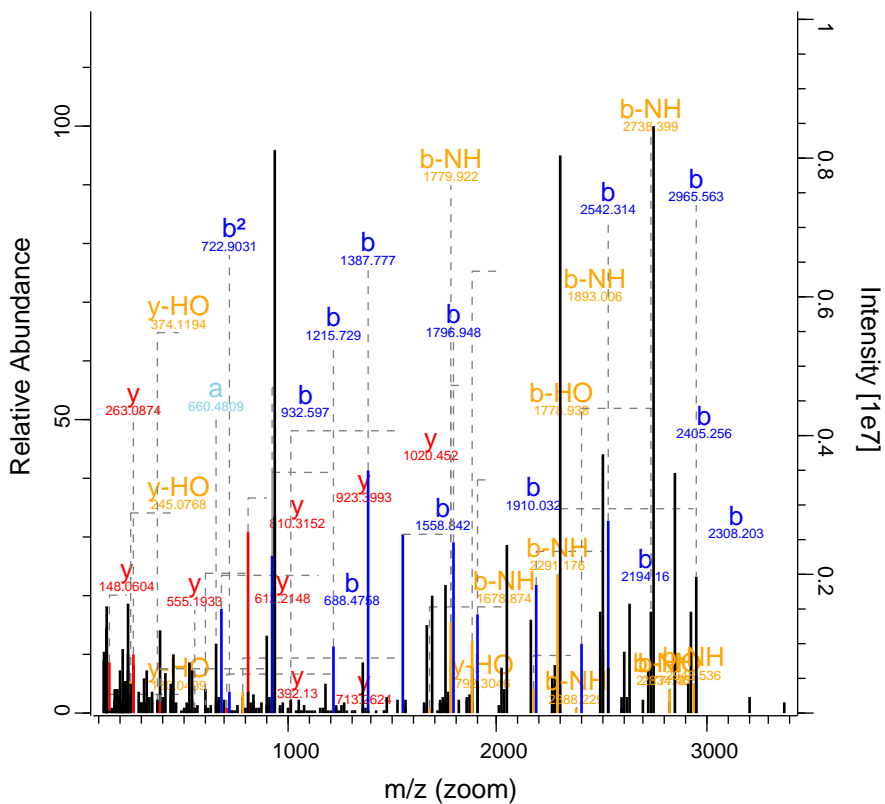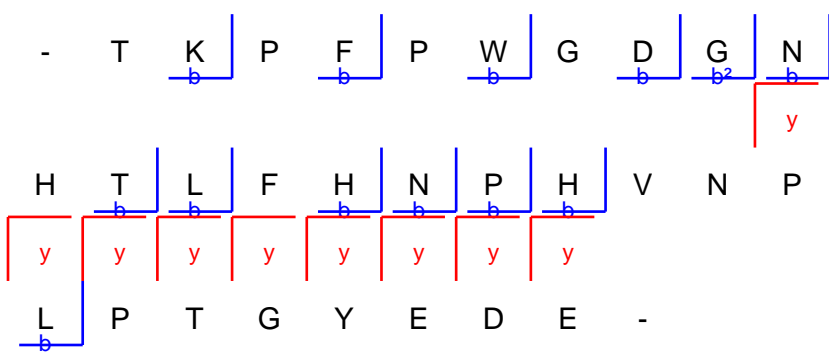



RO-QC-160121\_ZackD\_SS\_Set\_01\_Fractic 28440 FTMS; HC 66.98 1259.63 COX6A1

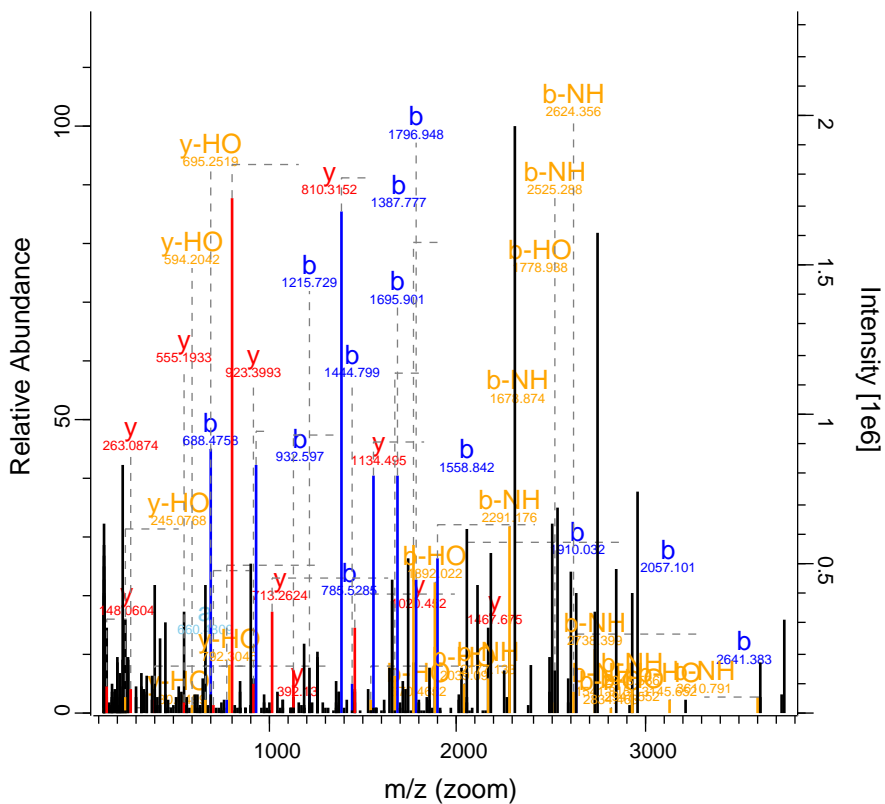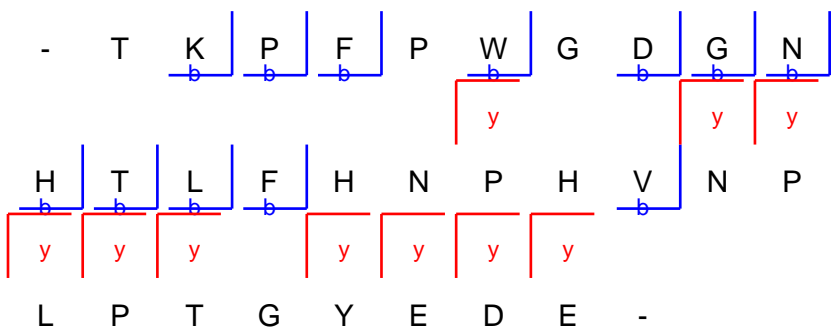

RO-QC-160121\_ZackD\_SS\_Set\_01\_Fraction 28452 FTMS; HC 73.81 756.18 COX6A1

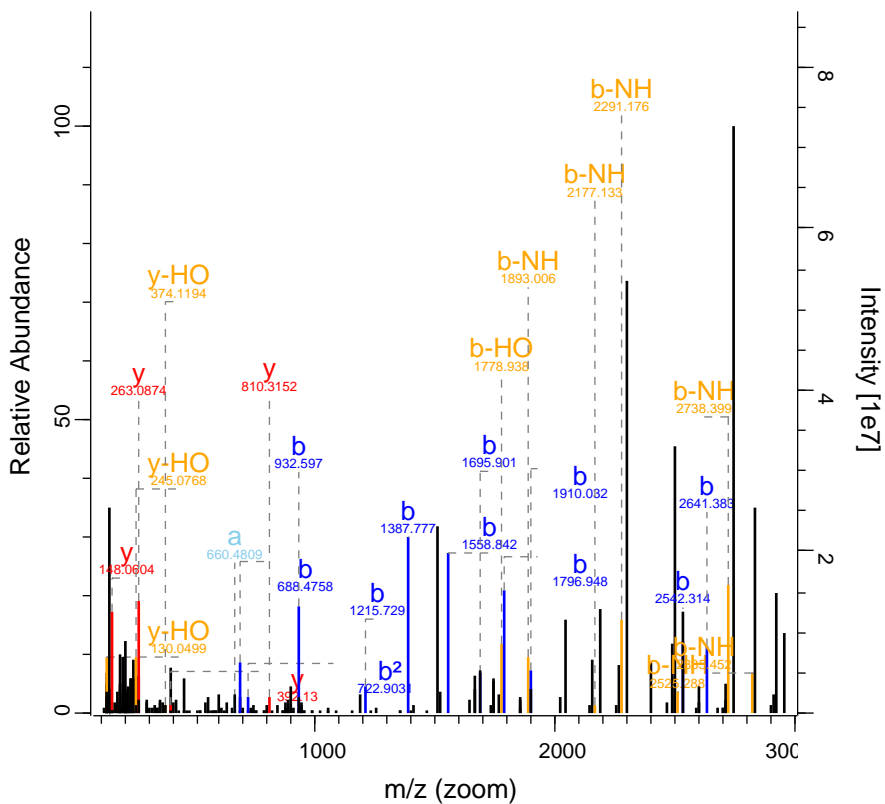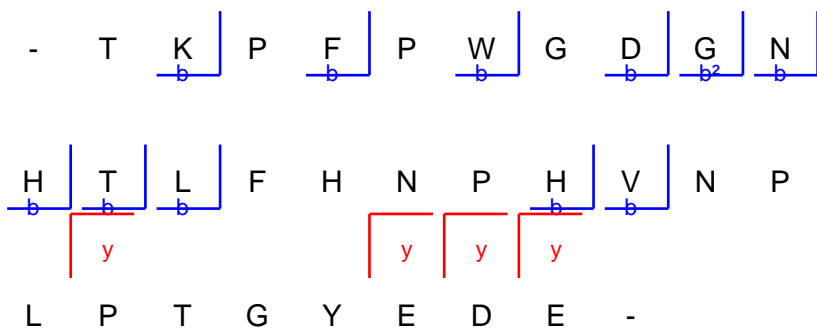

RO-QC-160121\_ZackD\_SS\_Set\_01\_Fractic 29863 FTMS; HC 56.09 1041.06 TICRR

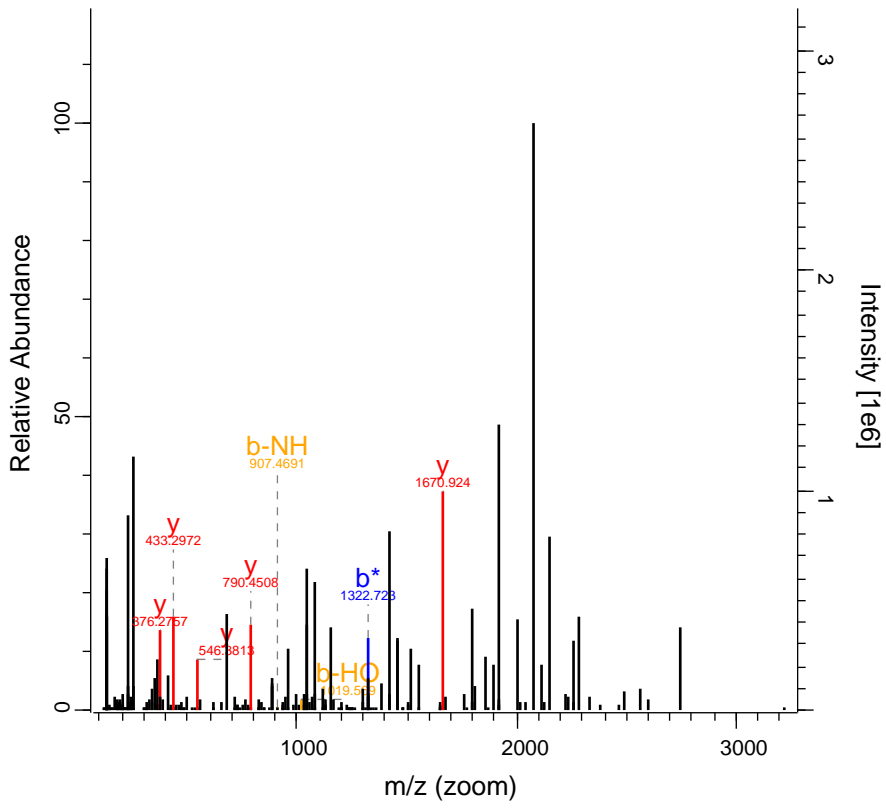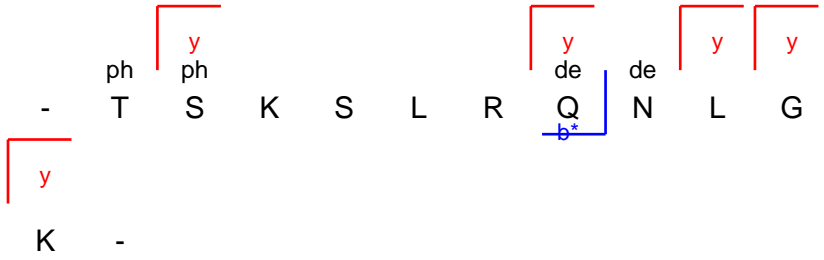

K -

RO-QC-160121\_ZackD\_SS\_Set\_01\_Fraction 30567 FTMS; HC 52.61 899.13 CEMIP

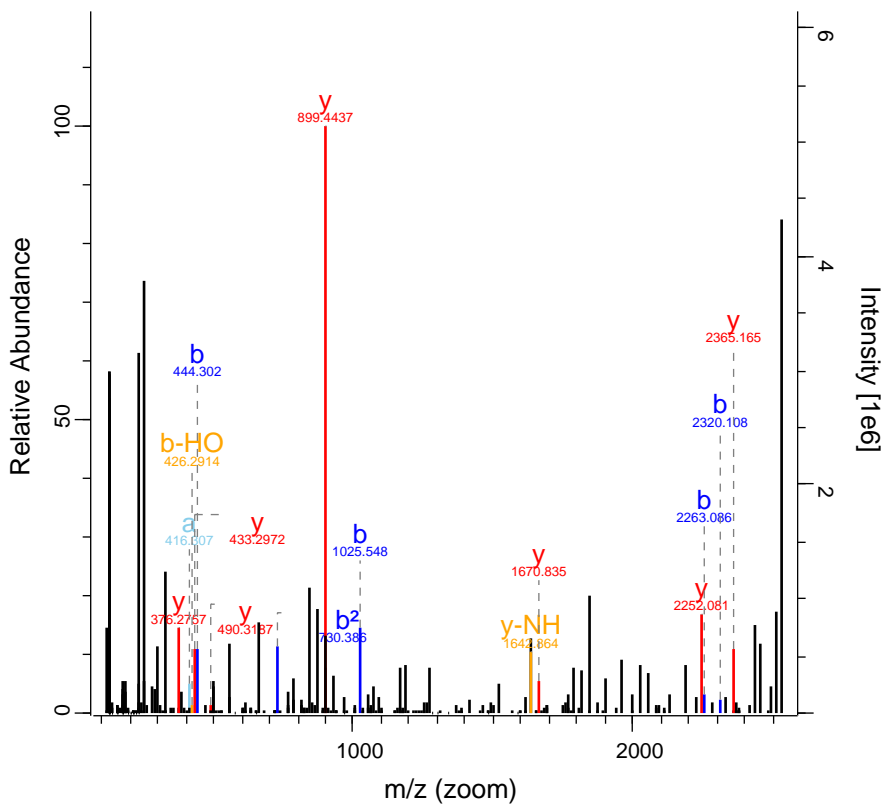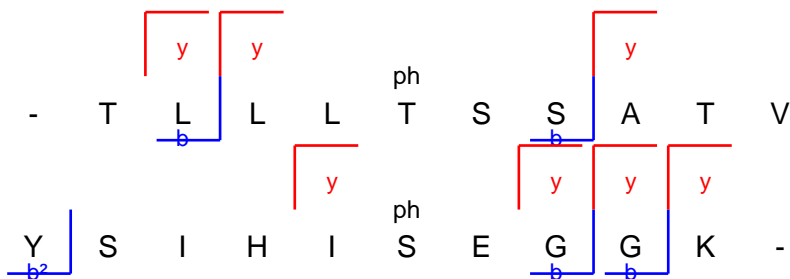

RO-QC-160121\_ZackD\_SS\_Set\_01\_Fractio 31584 FTMS; HC 119.27 961.47 NOP10

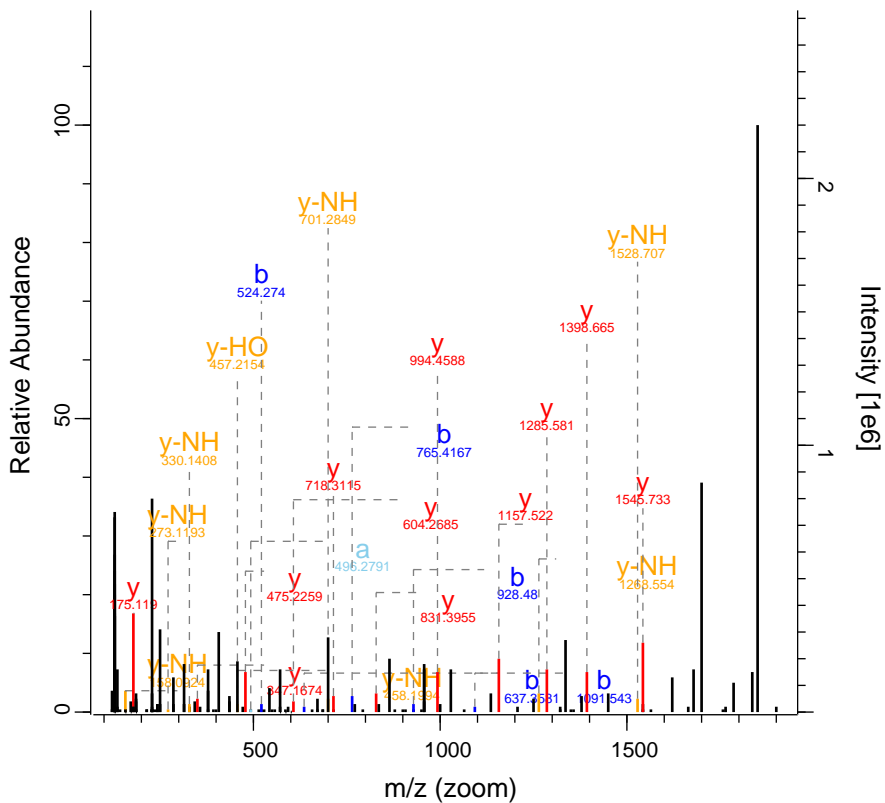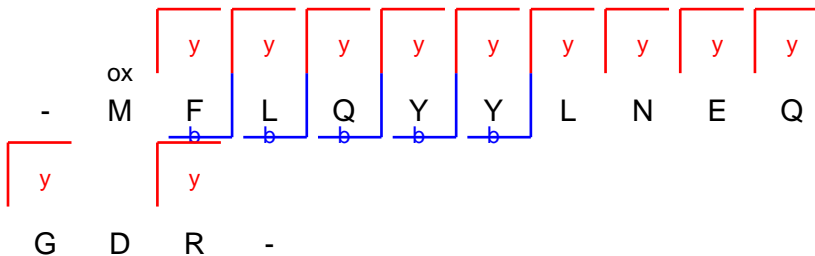

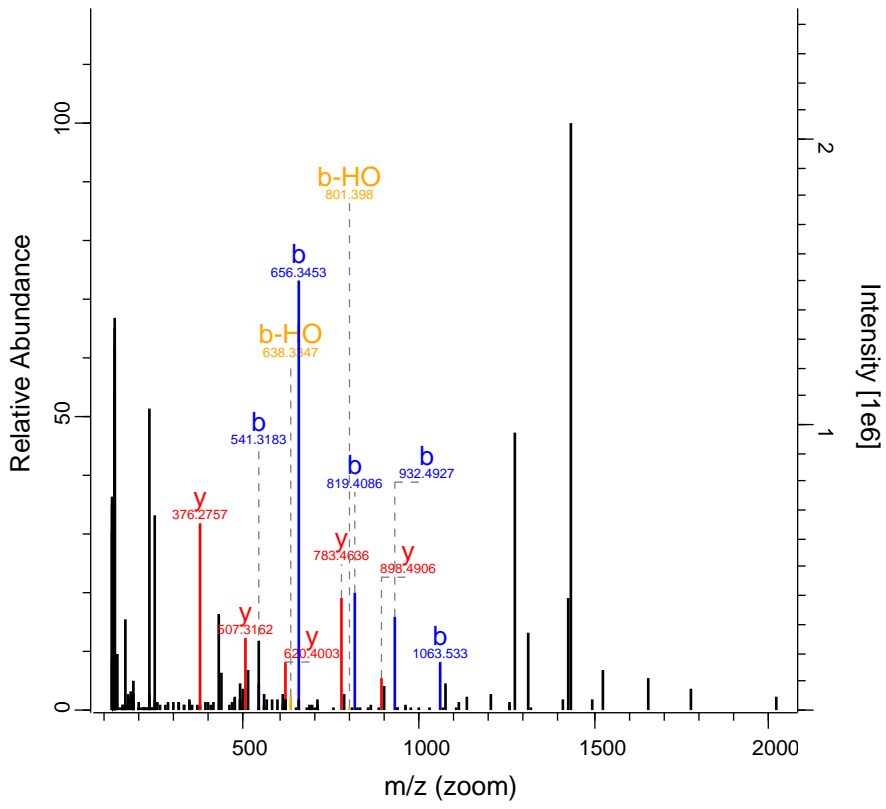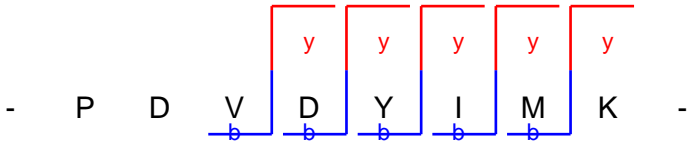

Raw File

Scan Method Score m/z

RO-QC-160121\_ZackD\_SS\_Set\_01\_Fraction\_9

31659 FTMS; HCD 59.54 1166.6

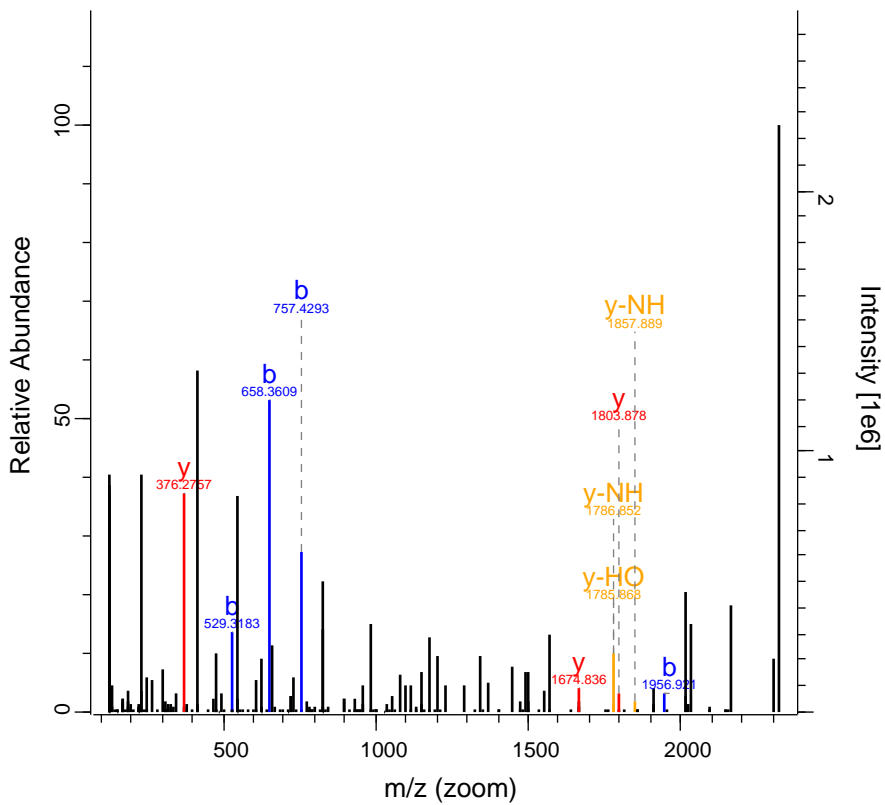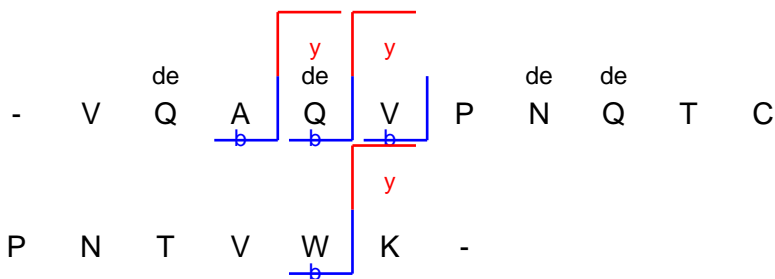

| Raw File                                | Scan  | Method    | Score | m/z    |
|-----------------------------------------|-------|-----------|-------|--------|
| RO-QC-160121_ZackD_SS_Set_01_Fraction_9 | 31695 | FTMS; HCD | 47.08 | 480.61 |

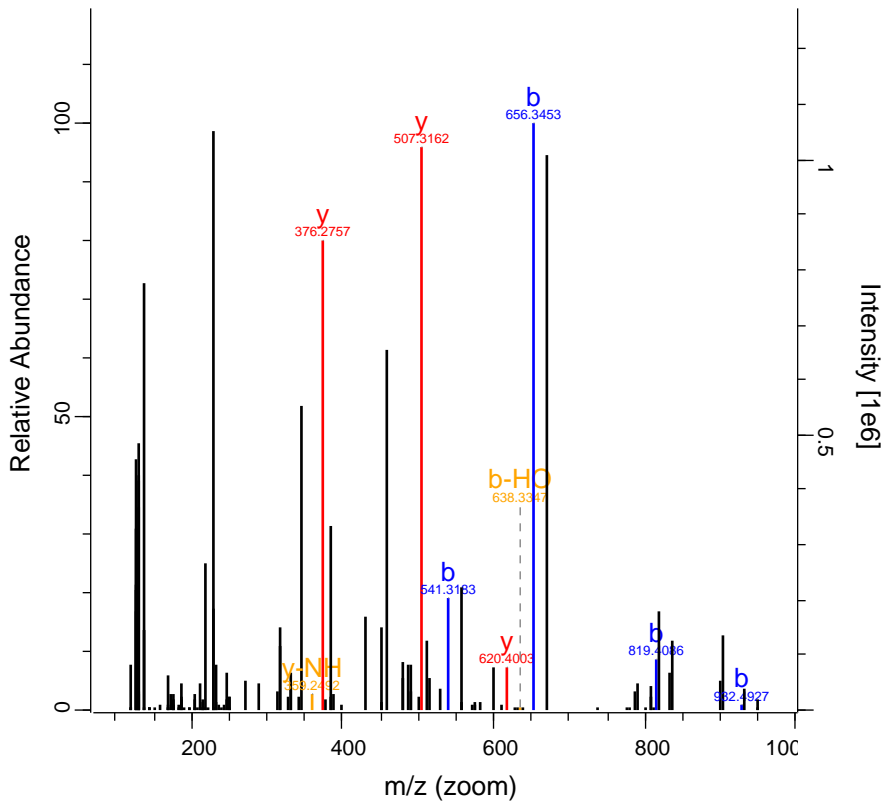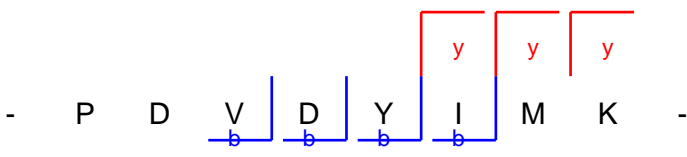



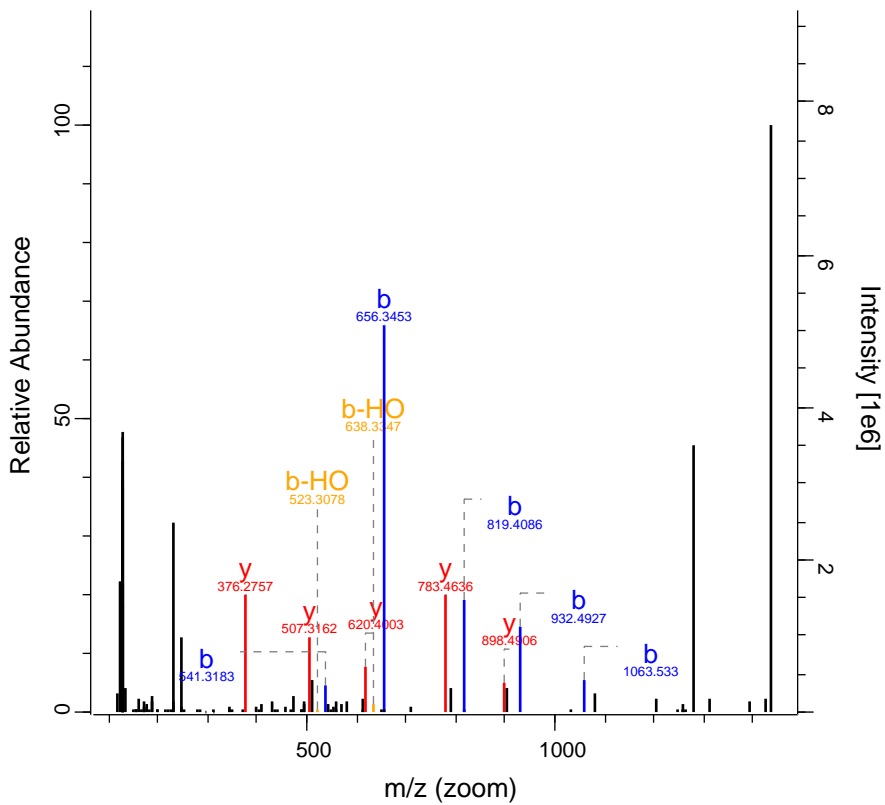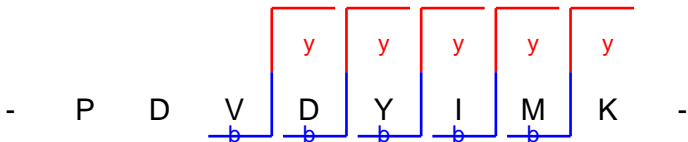

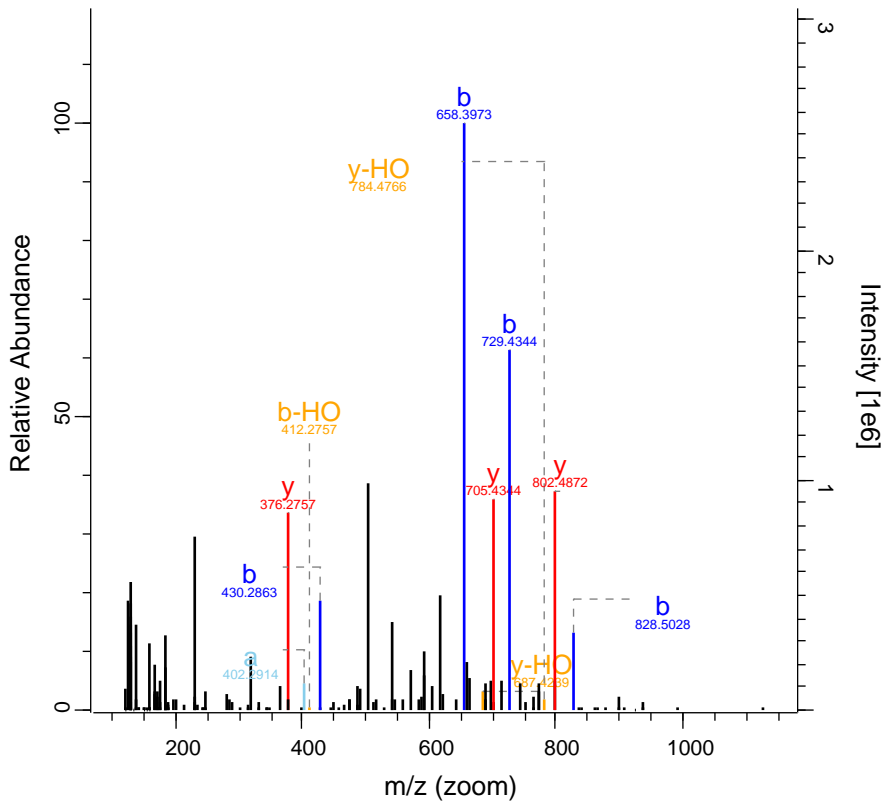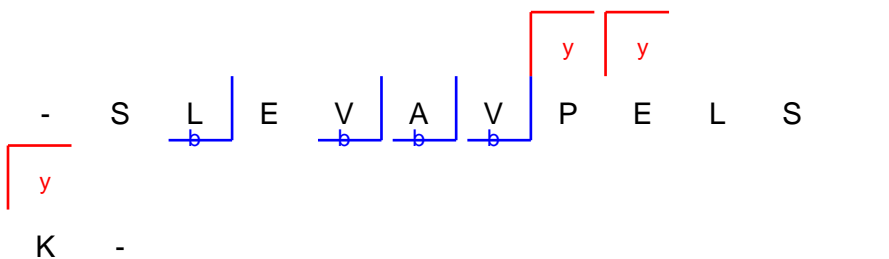

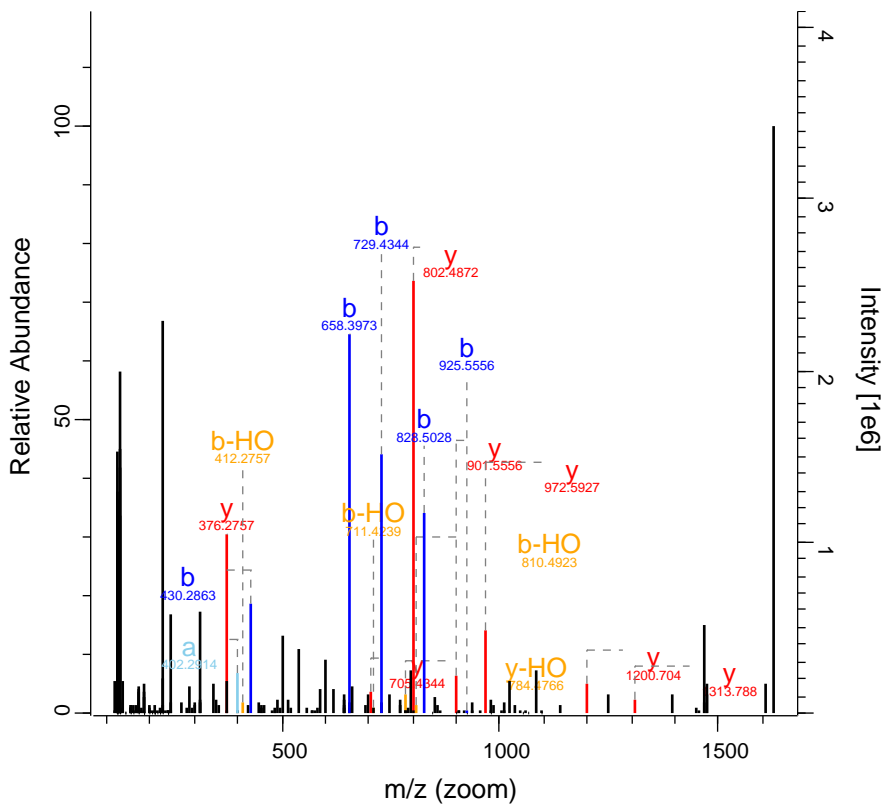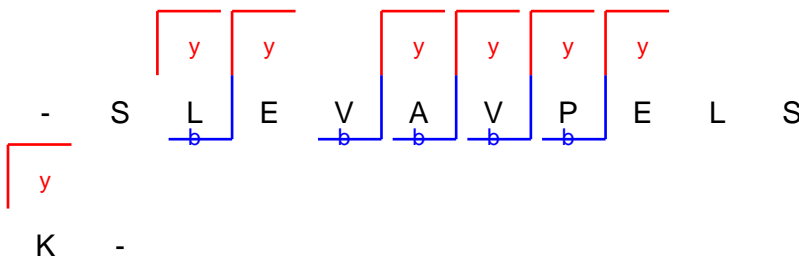

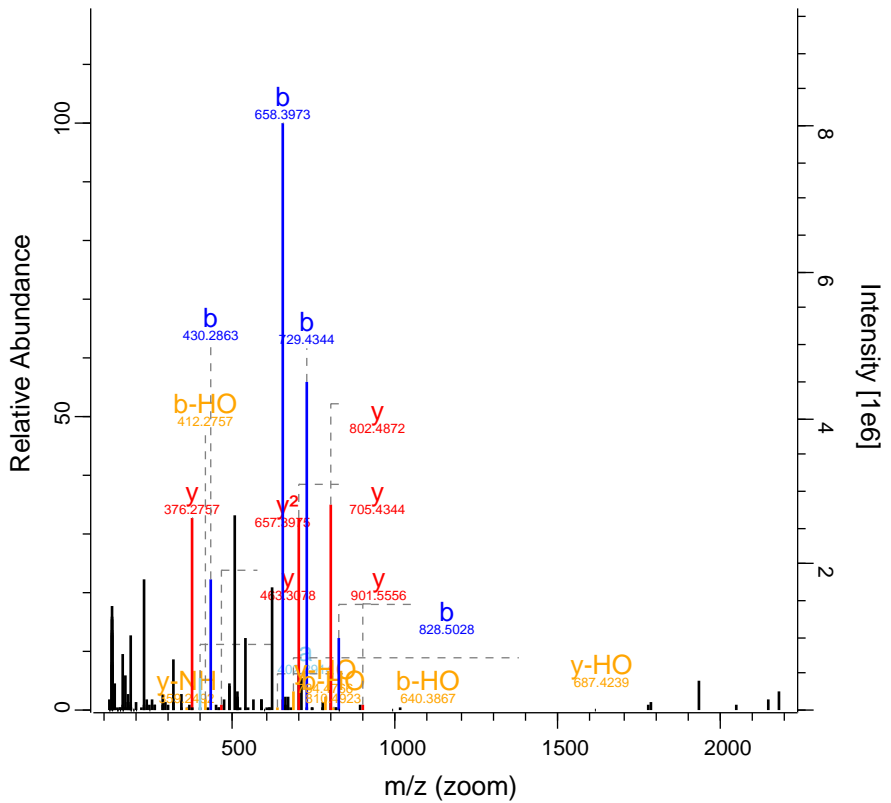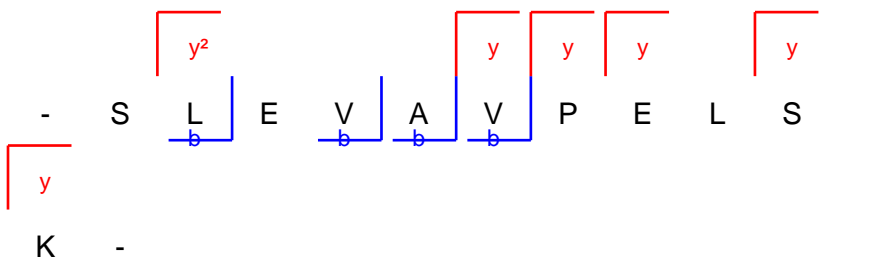

K -

RO-QC-160121\_ZackD\_SS\_Set\_01\_Fraction 32823 FTMS; HC 65.02 836.76 CNIH4

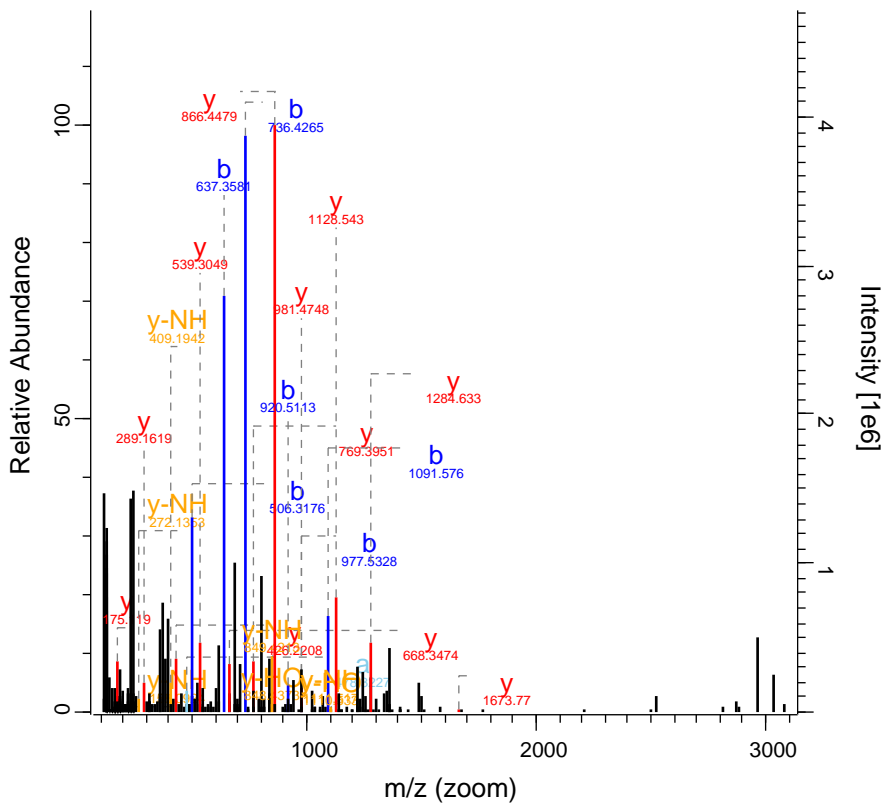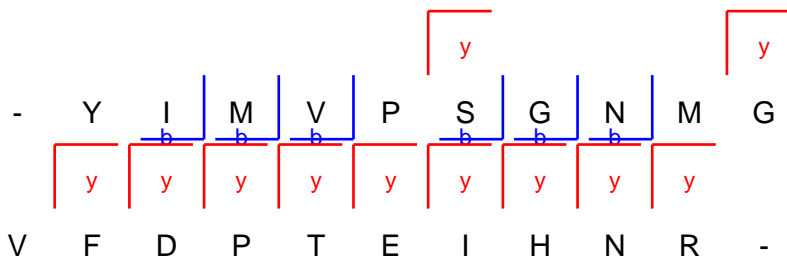

RO-QC-160121\_ZackD\_SS\_Set\_01\_Fraction 32889 FTMS; HC 105.77 627.32 CNIH4

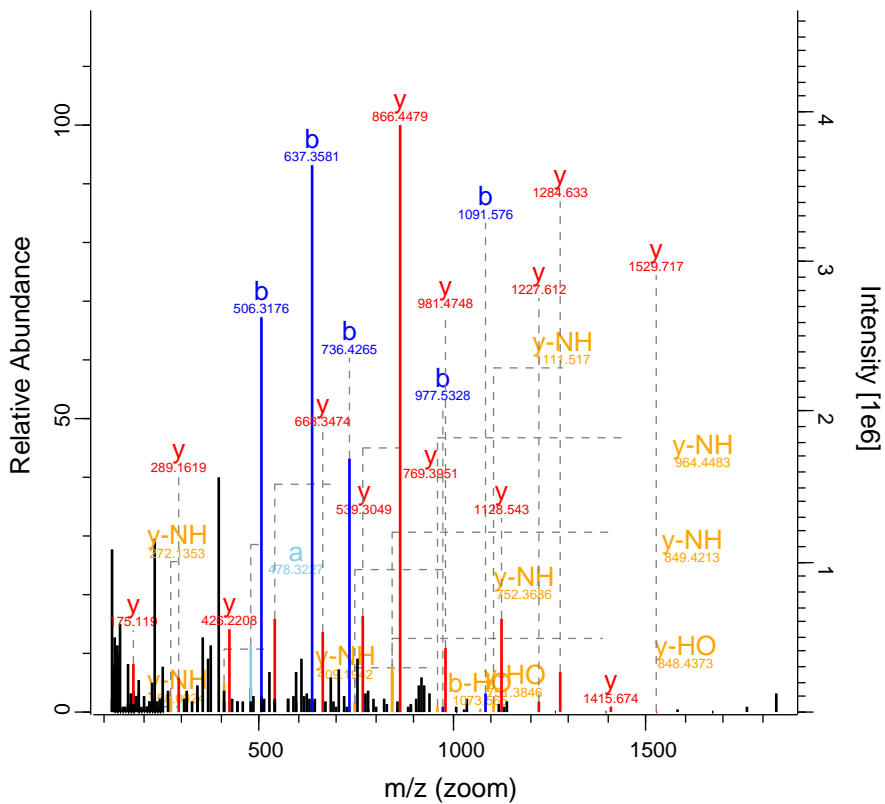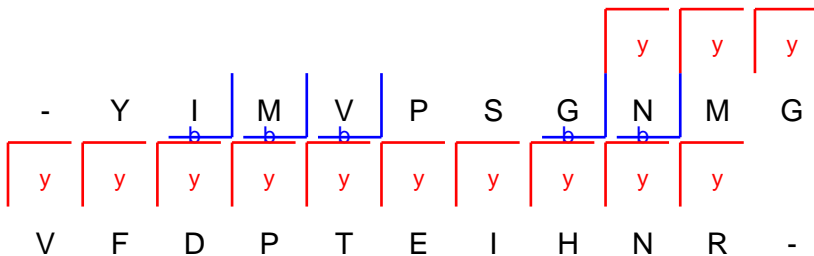



RO-QC-160121\_ZackD\_SS\_Set\_01\_Fraction 33946 FTMS; HCl 82.26 673.9 C19orf12

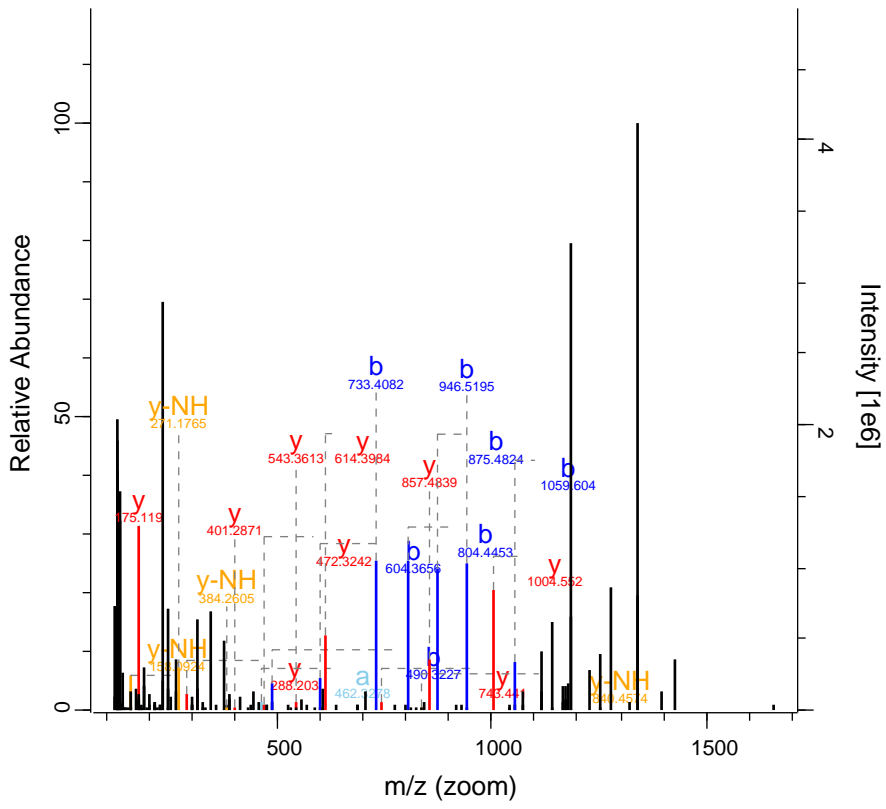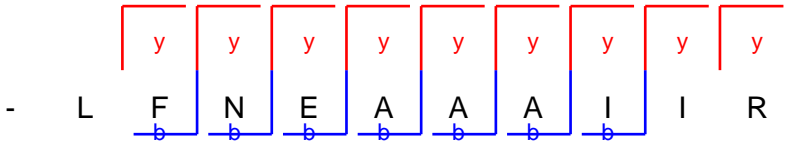

- L F N E A A A I R

-



RO-QC-160121\_ZackD\_SS\_Set\_01\_Fraction 35601 FTMS; HCl 40.18 976.5 ENAM

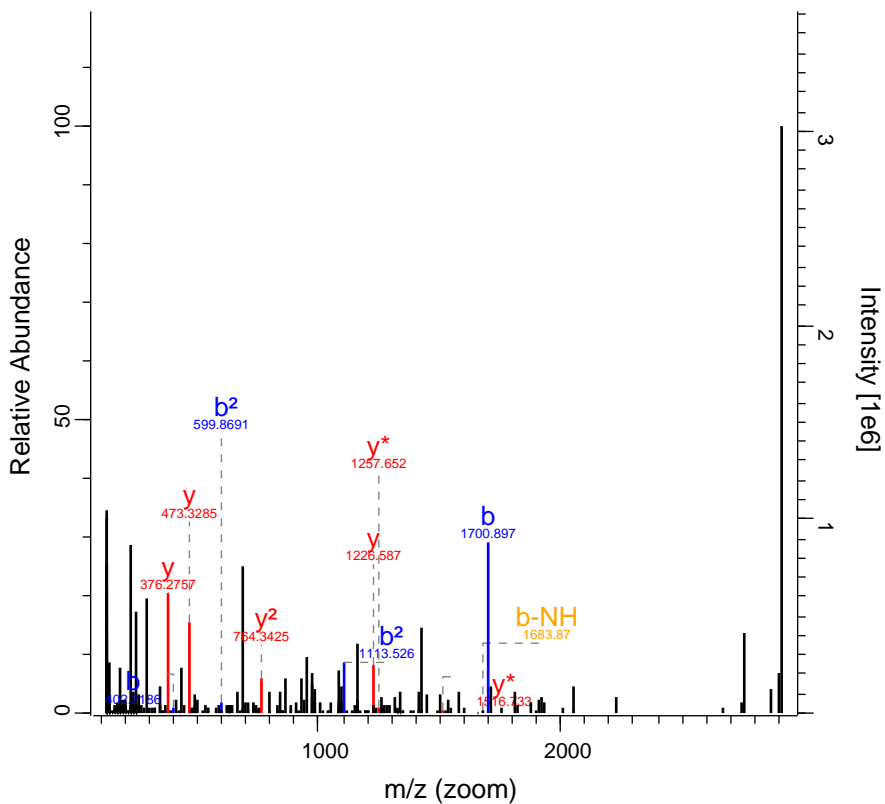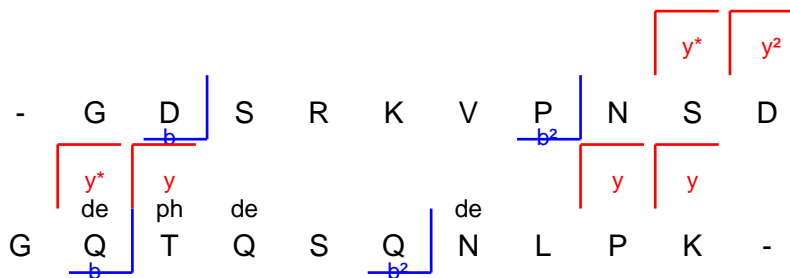

Raw File

Scan Method Score m/z

RO-QC-160121\_ZackD\_SS\_Set\_01\_Fraction\_9

35790 FTMS; HCD 53.33 901.48

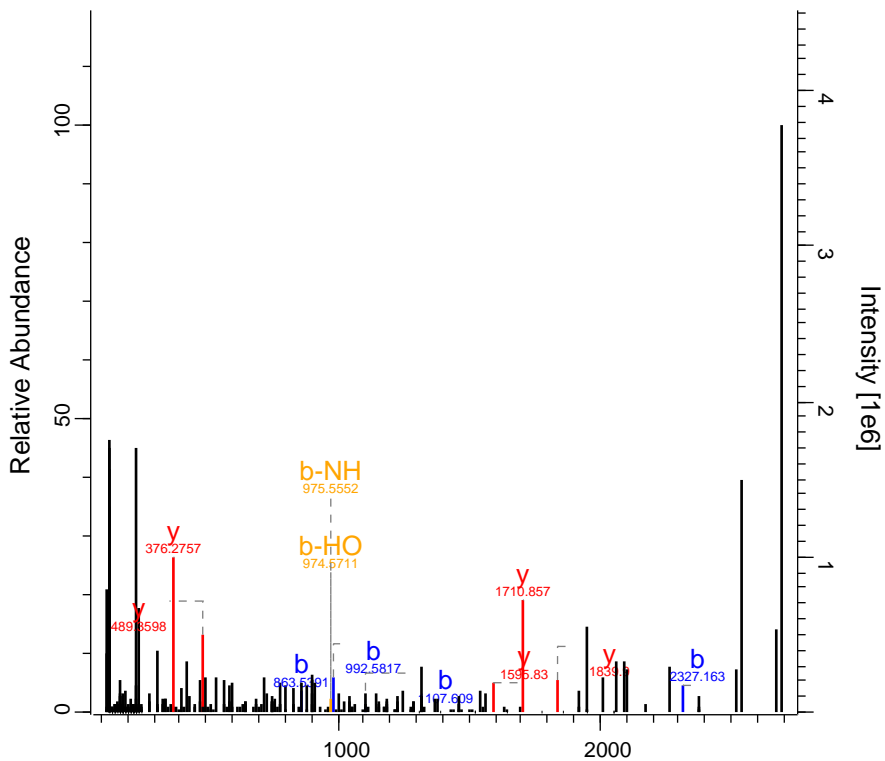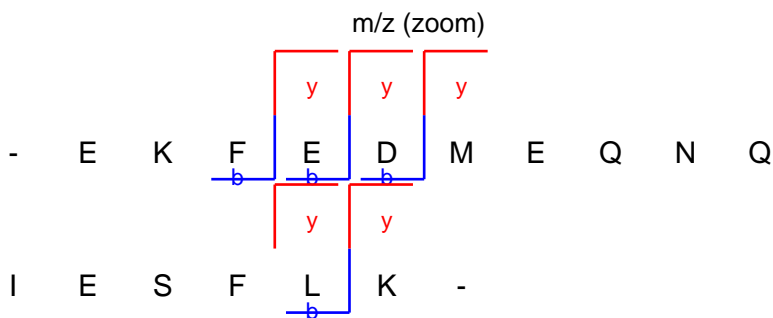

Raw File

Scan Method Score m/z

RO-QC-160121\_ZackD\_SS\_Set\_01\_Fraction\_9

35835 FTMS; HCD 34.61 676.62

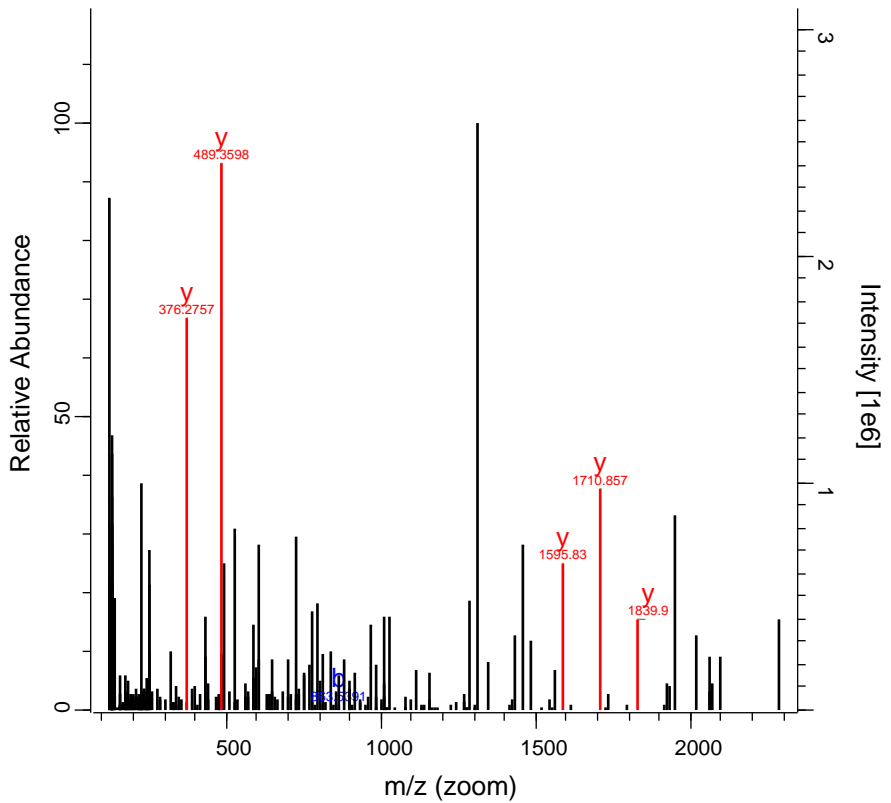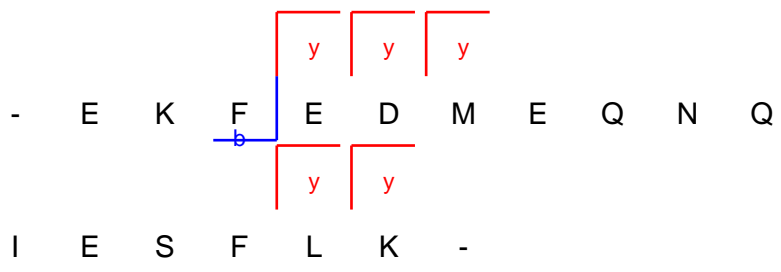

Raw File

Scan Method Score m/z

RO-QC-160121\_ZackD\_SS\_Set\_01\_Fraction\_9

36009 FTMS; HCD 64.65 901.48

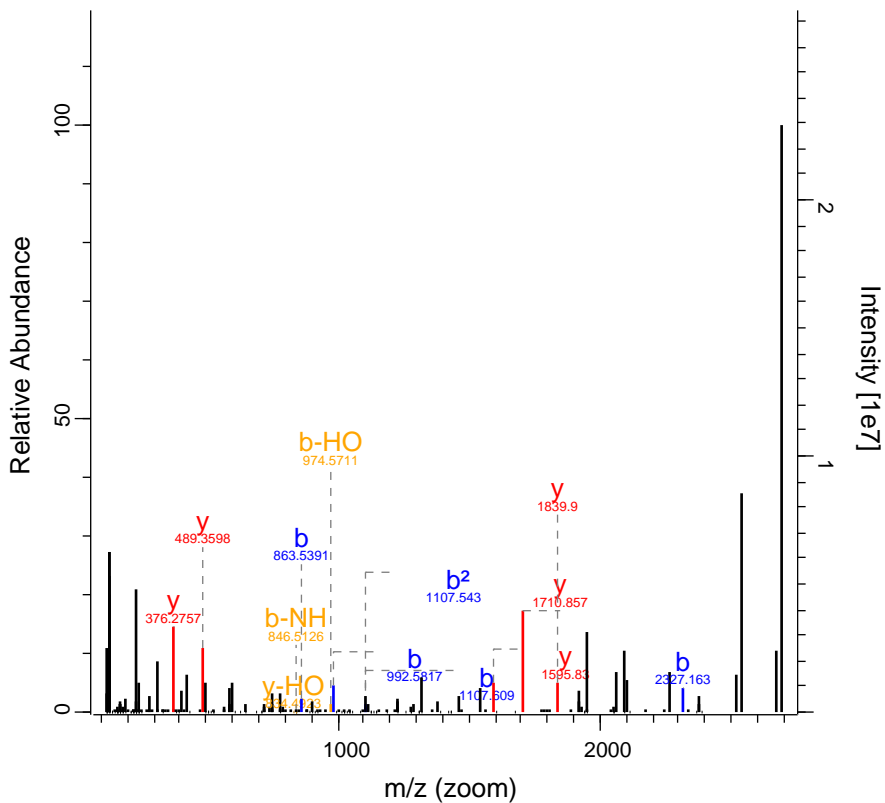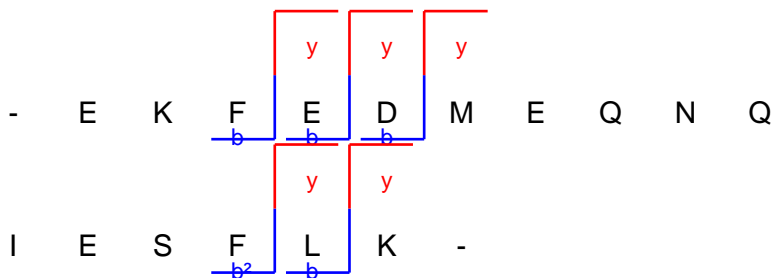



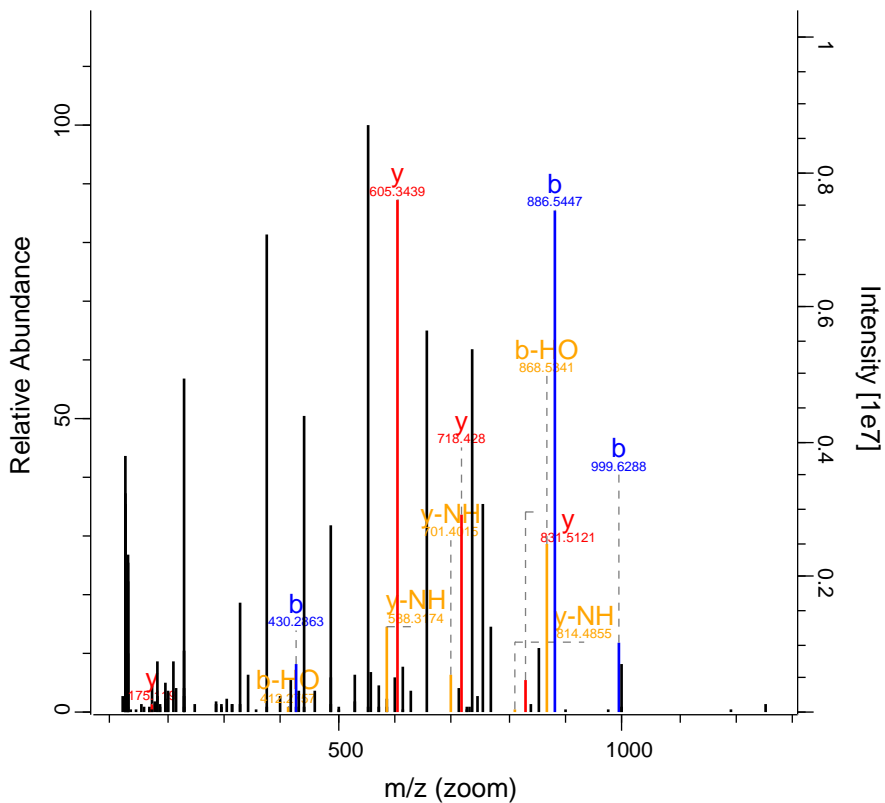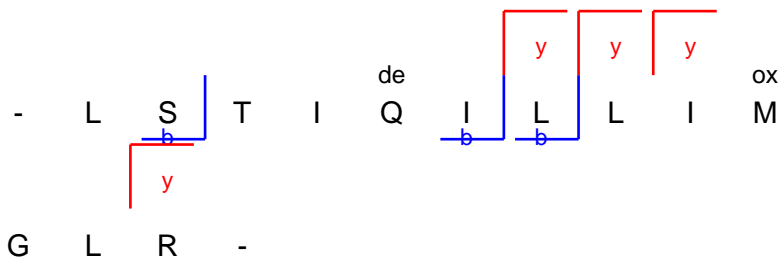

RO-QC-160121\_ZackD\_SS\_Set\_01\_Fractic 37211 FTMS; HC 64.65 1327.22 KIAA0226L

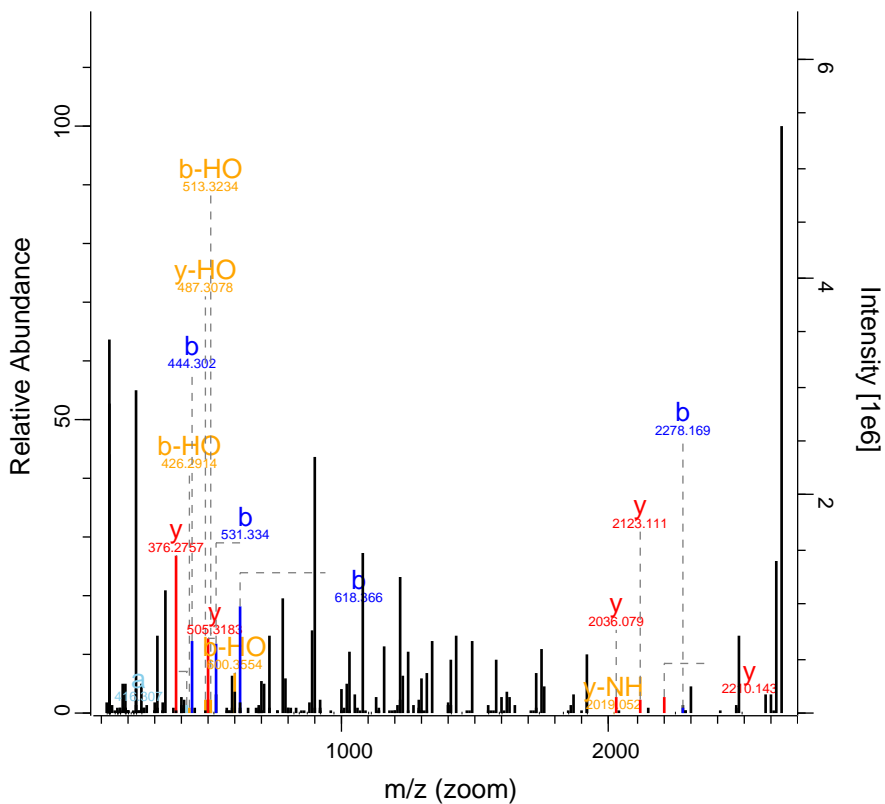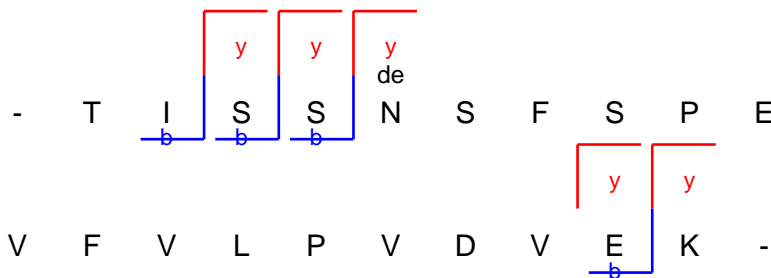

RO-QC-160121\_ZackD\_SS\_Set\_01\_Fractic 37620 FTMS; HC 85.53 1081.12 C6

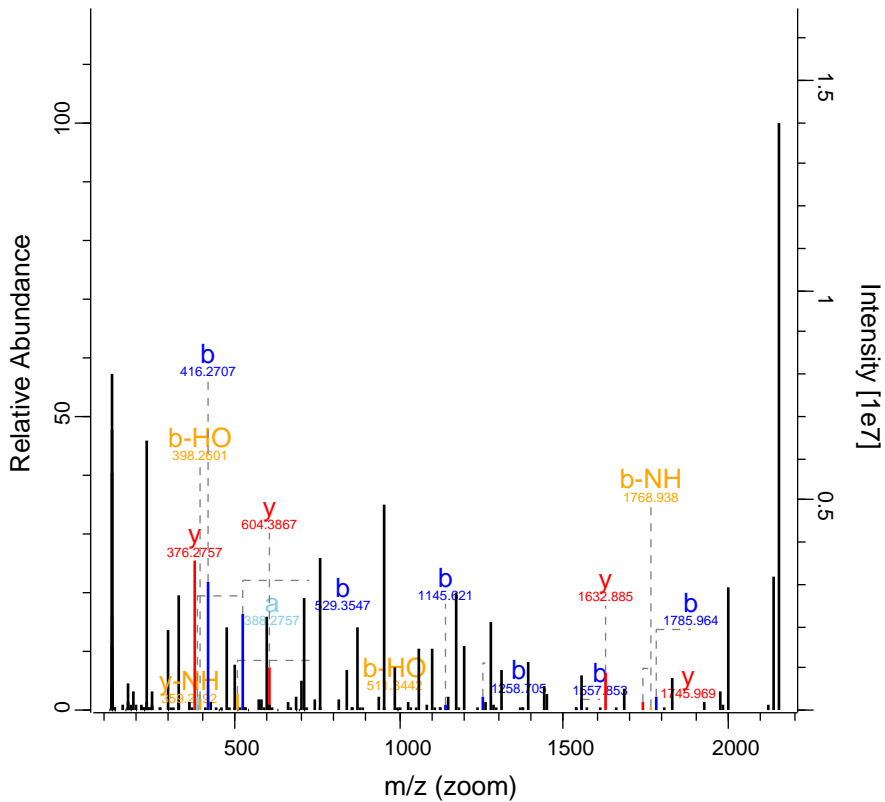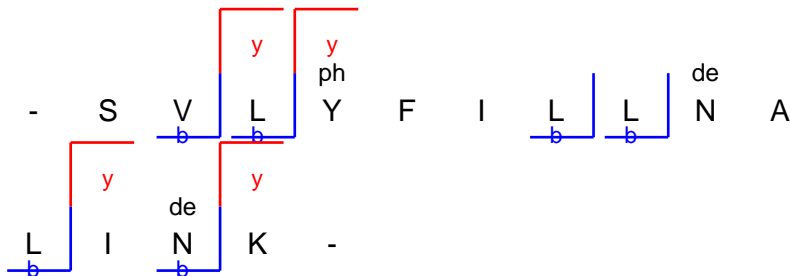



RO-QC-160121\_ZackD\_SS\_Set\_01\_Fractic 37956 FTMS; HC 97.8 1028.59 ZKSCAN2

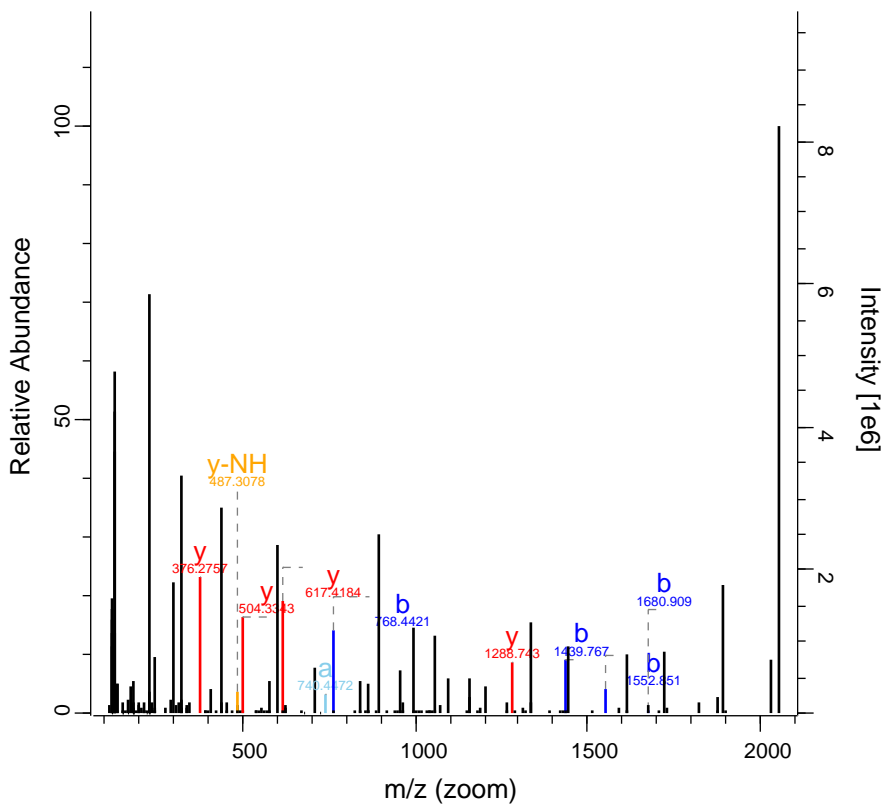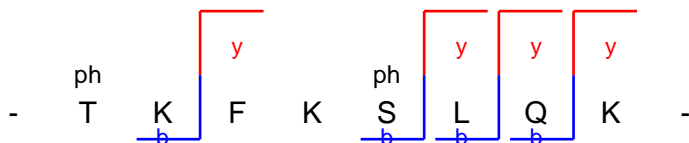

RO-QC-160121\_ZackD\_SS\_Set\_01\_Fractic 41167 FTMS; HC 145.81 1149.13 NPW

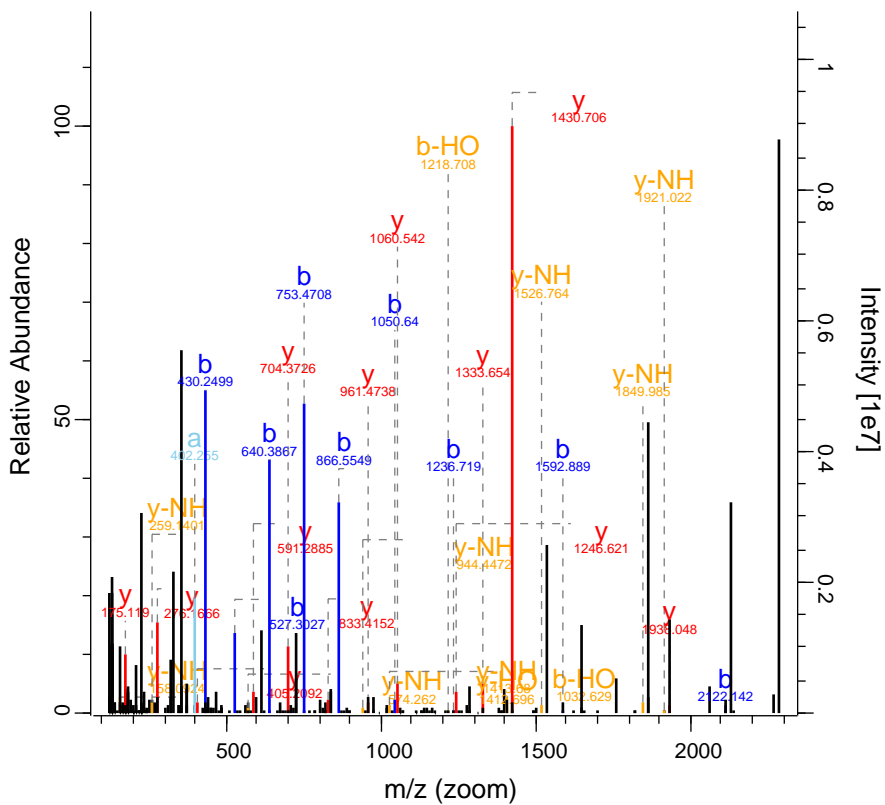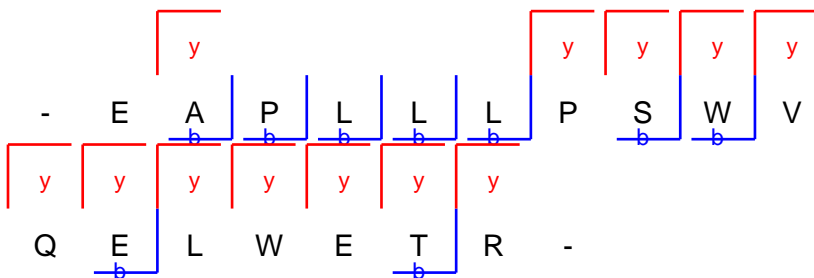

RO-QC-160121\_ZackD\_SS\_Set\_01\_Fraction 41182 FTMS; HC 77.19 766.42 NPW

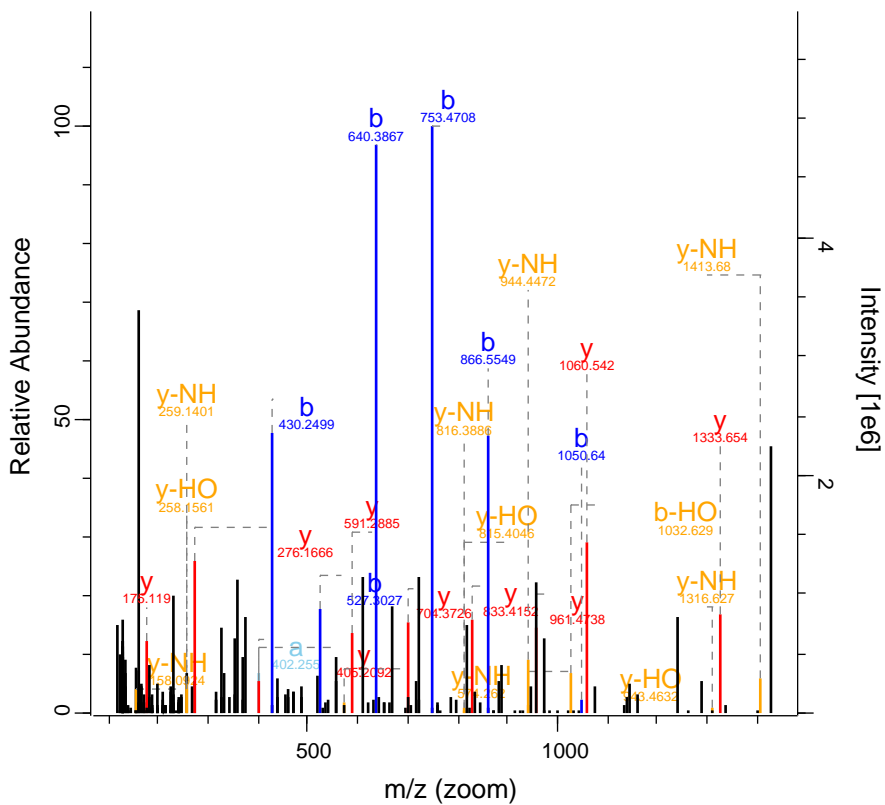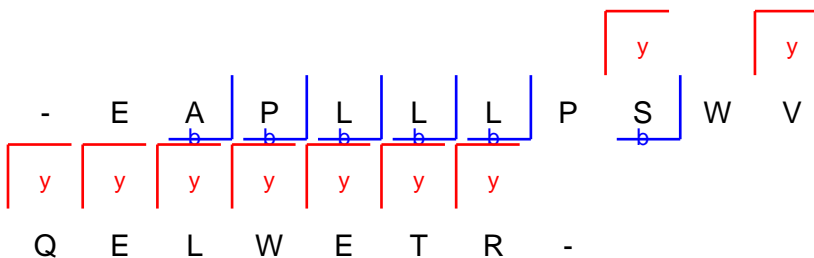

Raw File

Scan Method Score m/z

RO-QC-160121\_ZackD\_SS\_Set\_01\_Fraction\_10

4331 FTMS; HCD 46.57 464.91

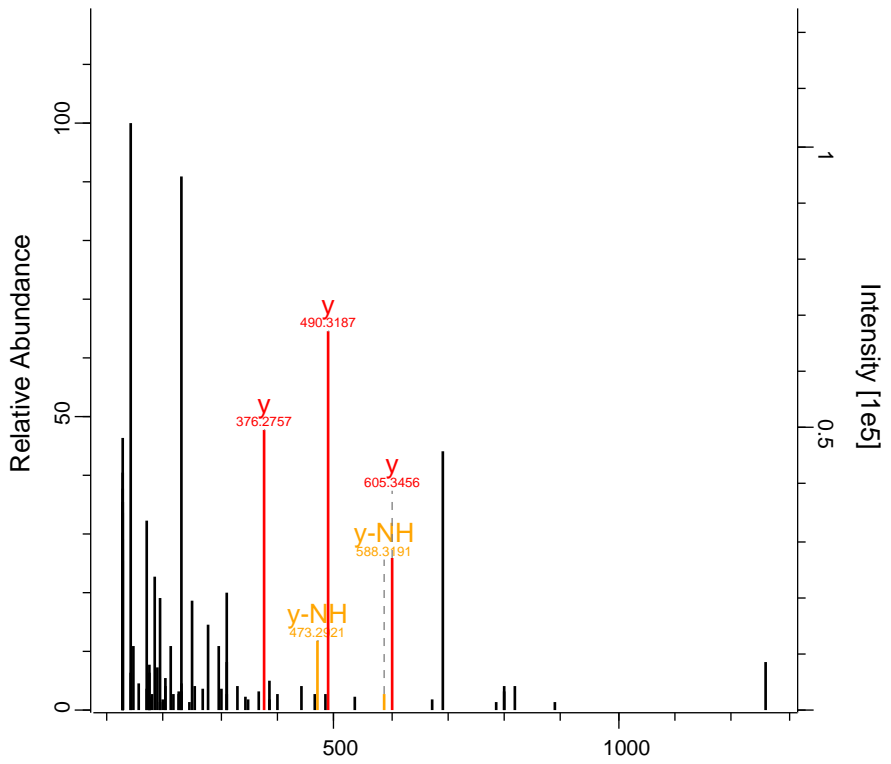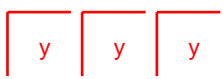

ox

- F M Y T D N K -

RO-QC-160121\_ZackD\_SS\_Set\_01\_Fraction 4532 FTMS; HC 72.64 776.86 USP42

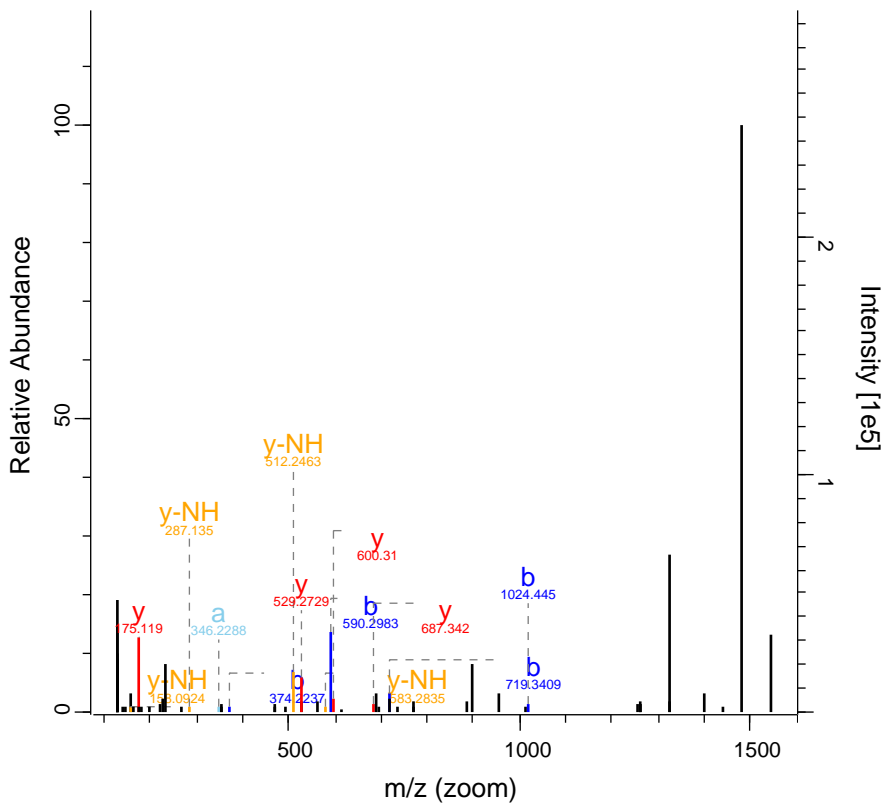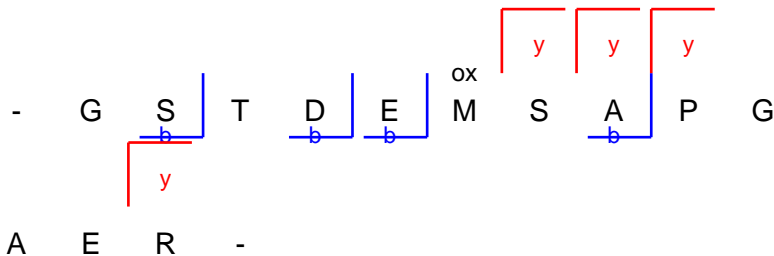

RO-QC-160121\_ZackD\_SS\_Set\_01\_Fraction 5143 FTMS; HC 102.53 494.92 TMC06

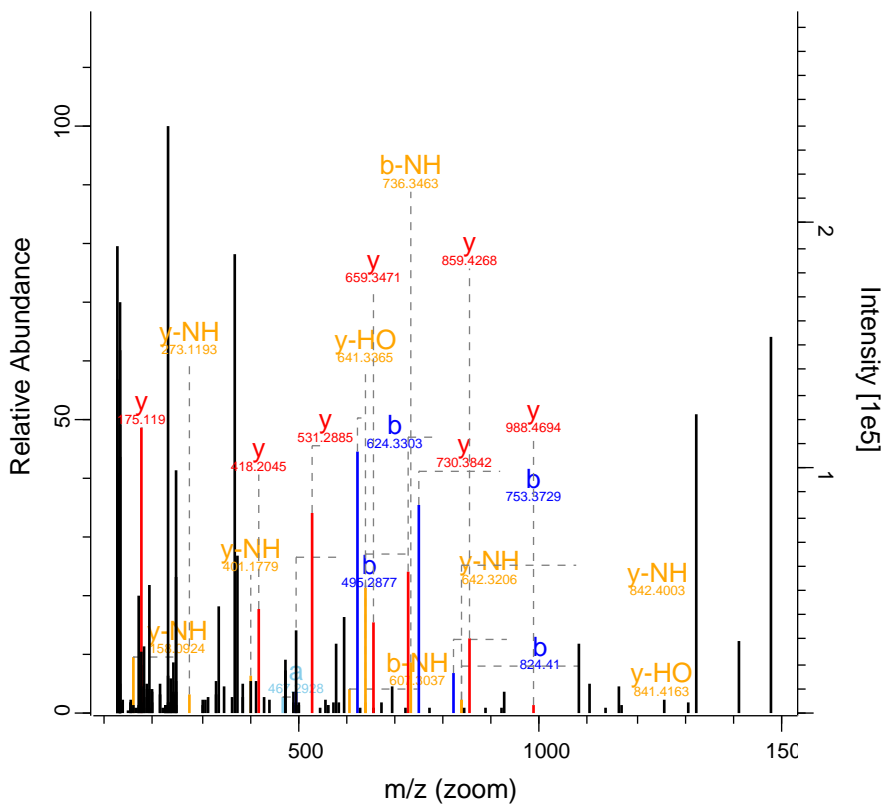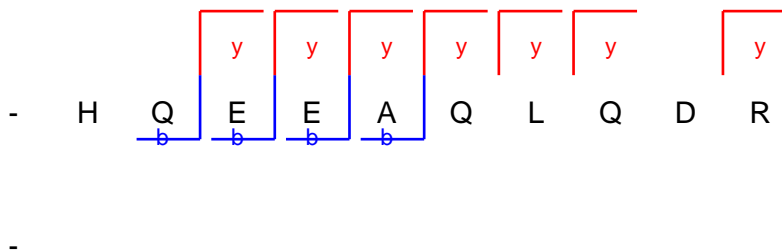

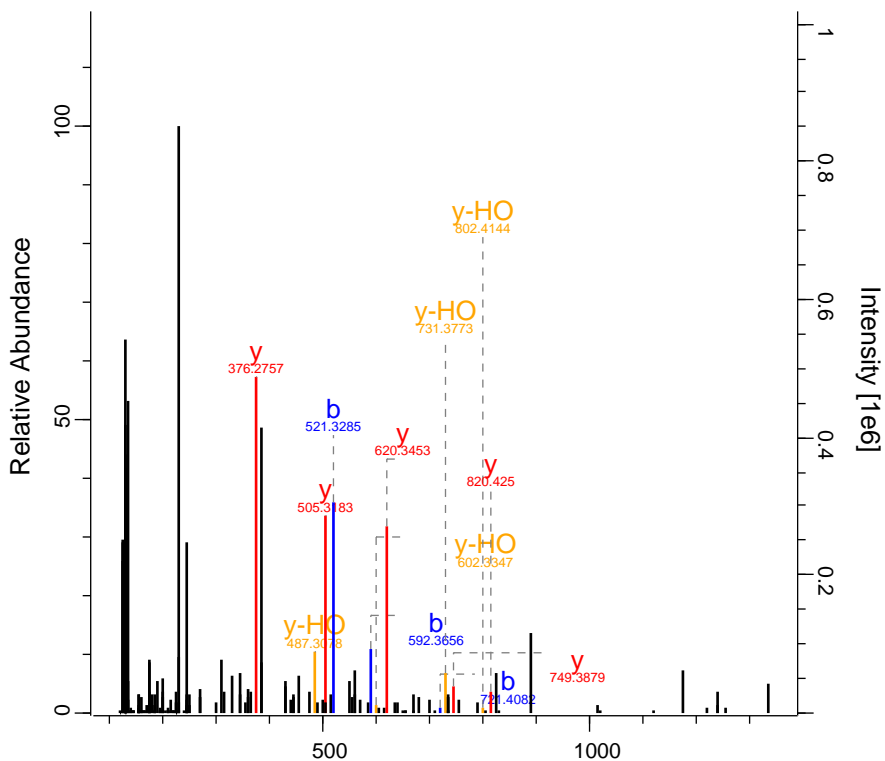

m/z (zoom)

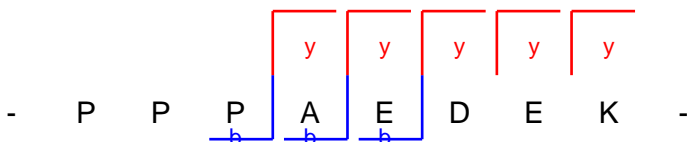

RO-QC-160121\_ZackD\_SS\_Set\_01\_Fraction 5508 FTMS; HC 44.39 834.41 B3GALT2

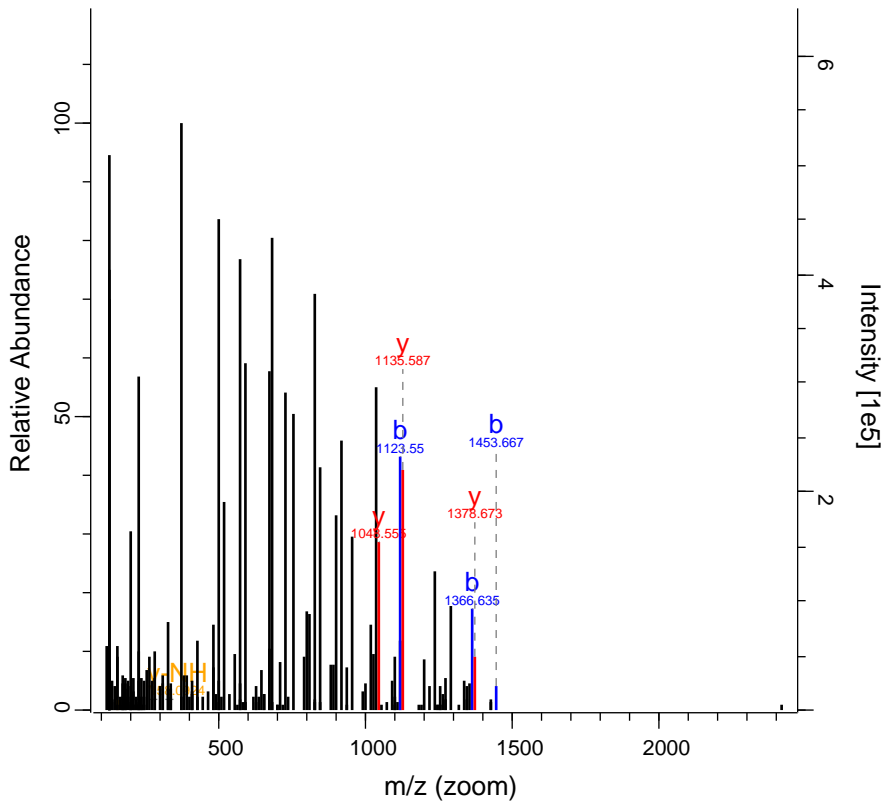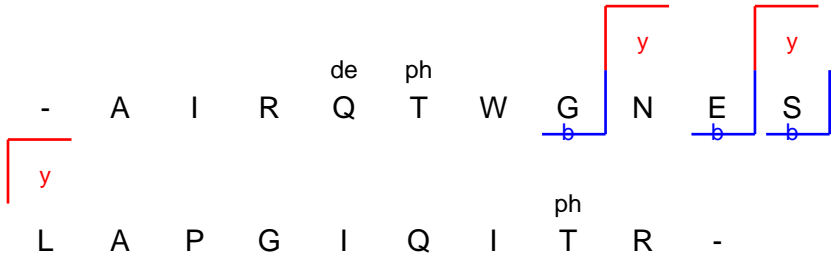



RO-QC-160121\_ZackD\_SS\_Set\_01\_Fraction 5543 FTMS; HC 168 650.35 CD99

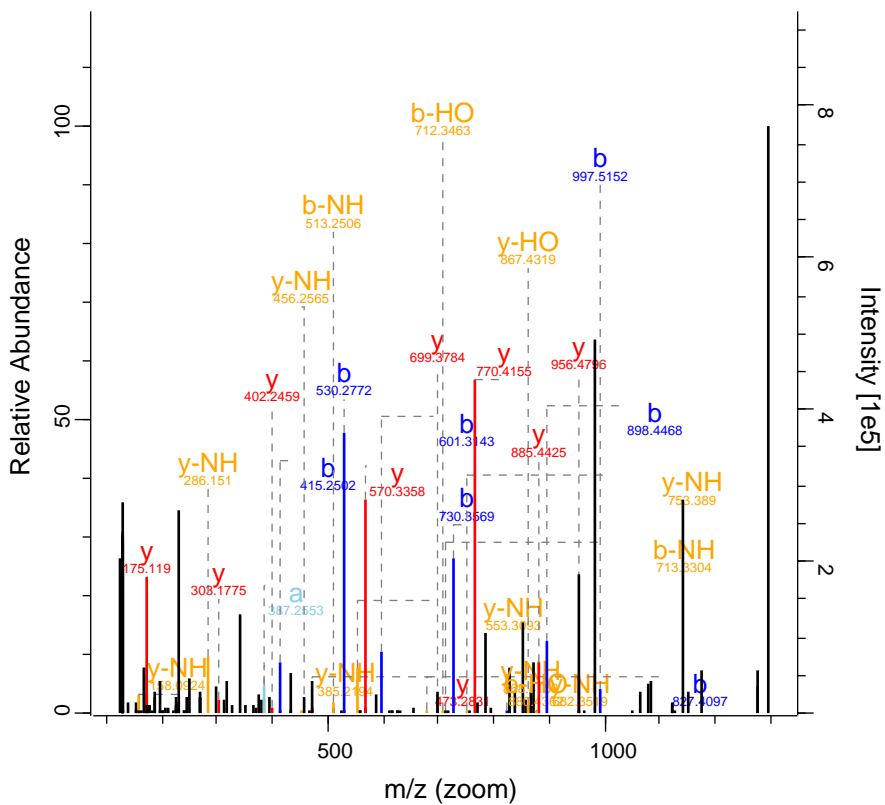

m/z (zoom)

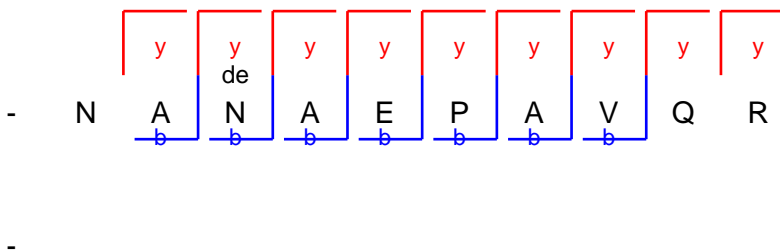

RO-QC-160121\_ZackD\_SS\_Set\_01\_Fraction\_5613 FTMS; HC 115.71 674.3 FZD7

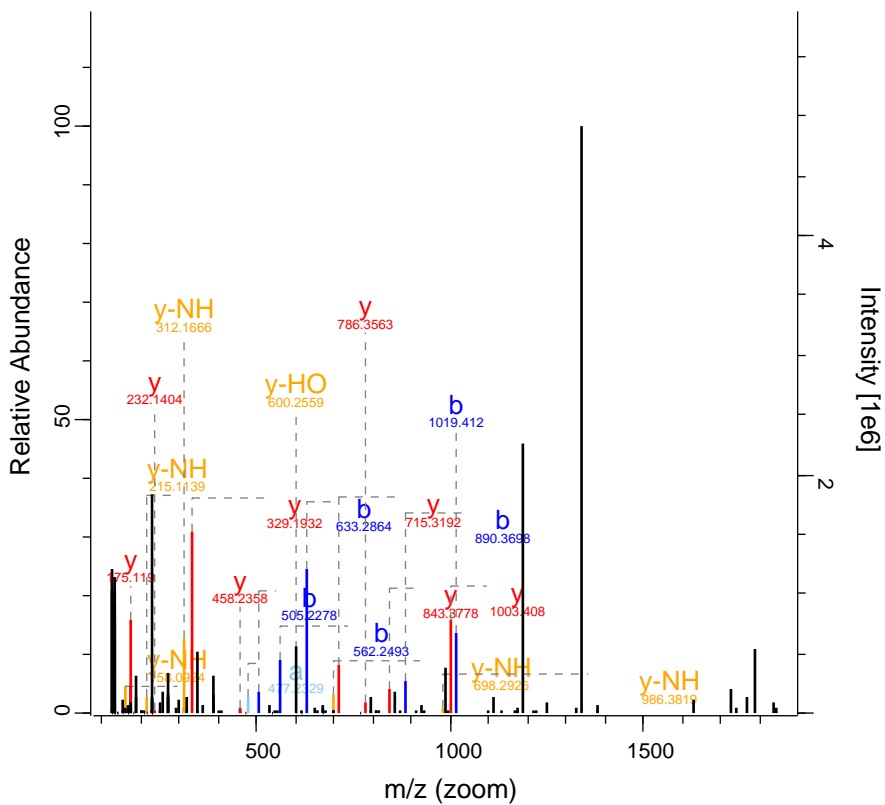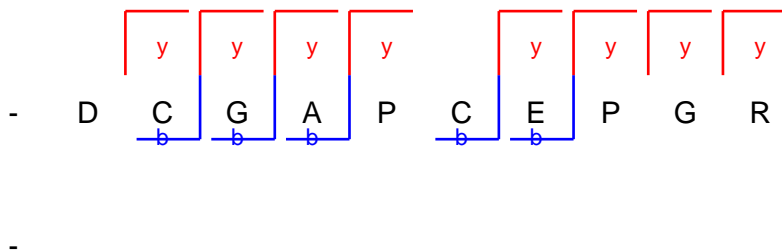

RO-QC-160121\_ZackD\_SS\_Set\_01\_Fraction 5758 FTMS; HC 161.44 650.35 CD99

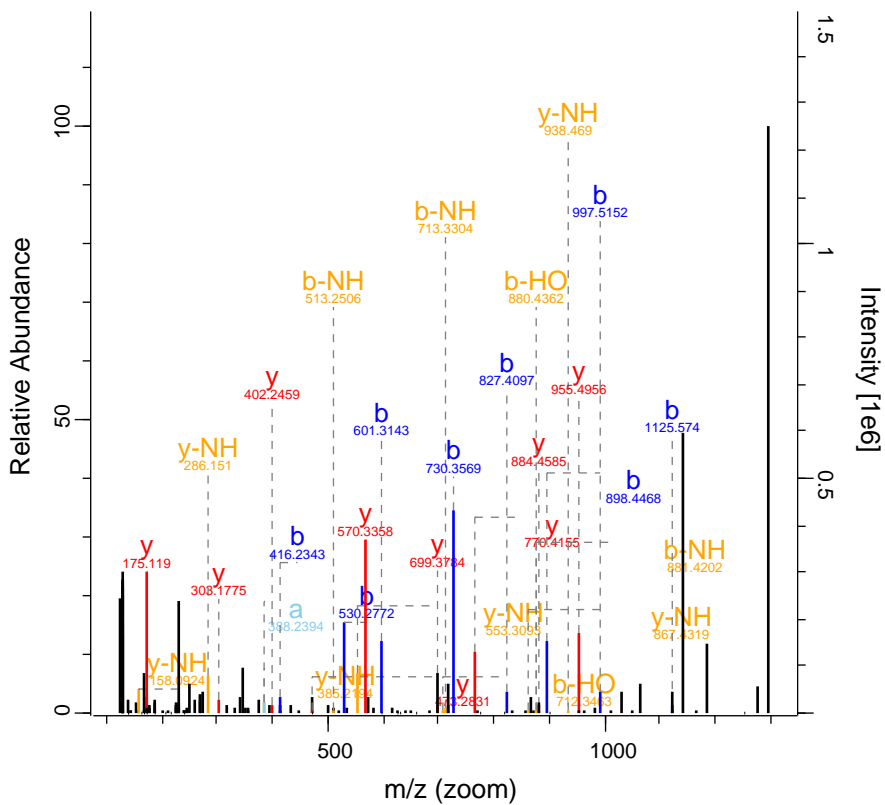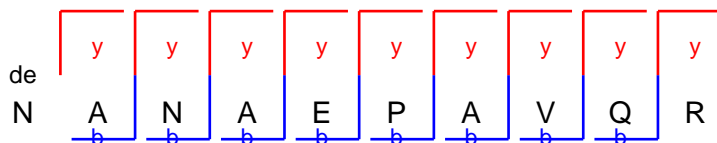

RO-QC-160121\_ZackD\_SS\_Set\_01\_Fraction 5865 FTMS; HC 54.55 440.52 C15orf41

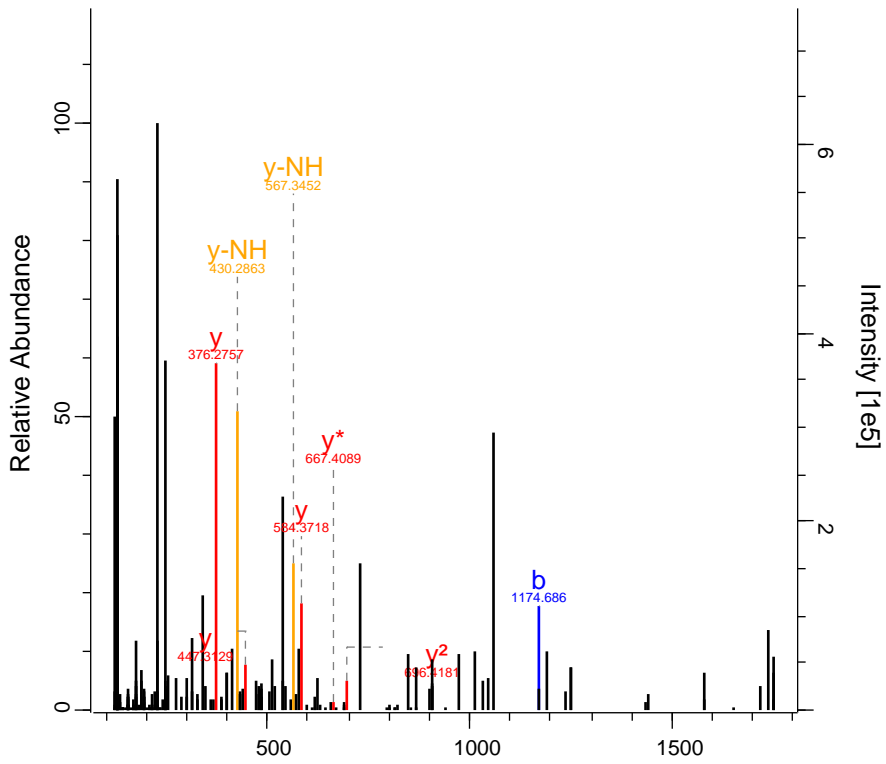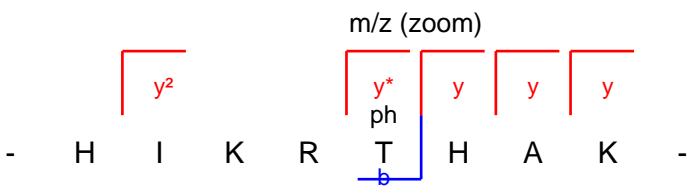

RO-QC-160121\_ZackD\_SS\_Set\_01\_Fraction 6052 FTMS; HC 53.49 668.82 DSG1

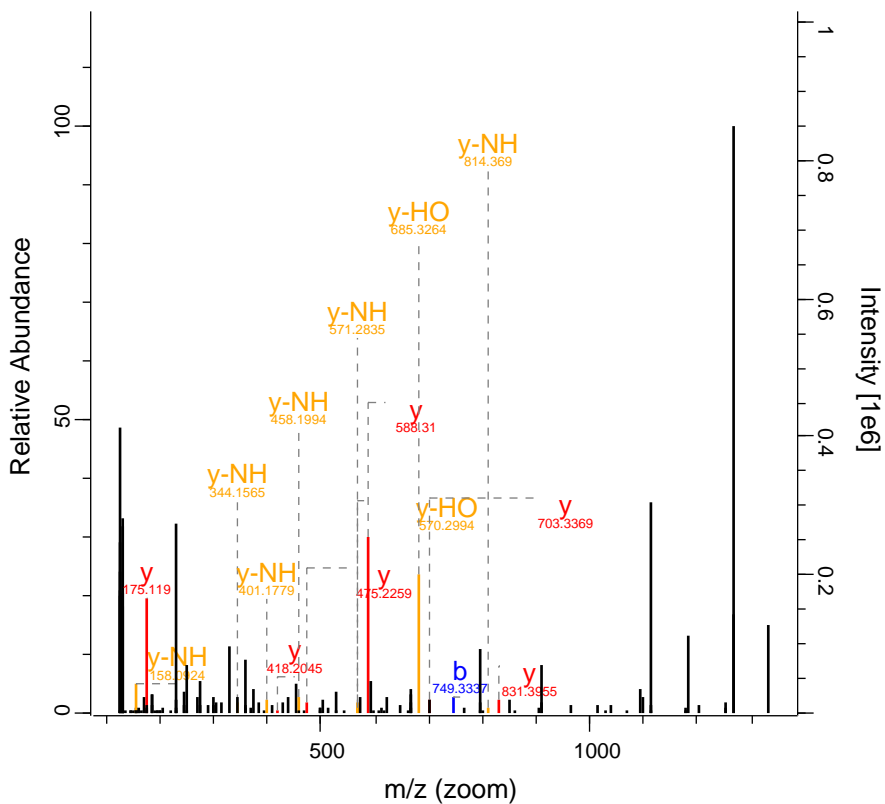

m/z (zoom)

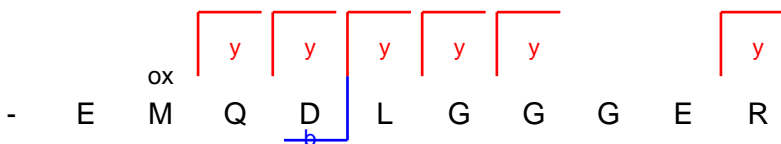

RO-QC-160121\_ZackD\_SS\_Set\_01\_Fraction 6141 FTMS; HC 131.12 650.35 CD99

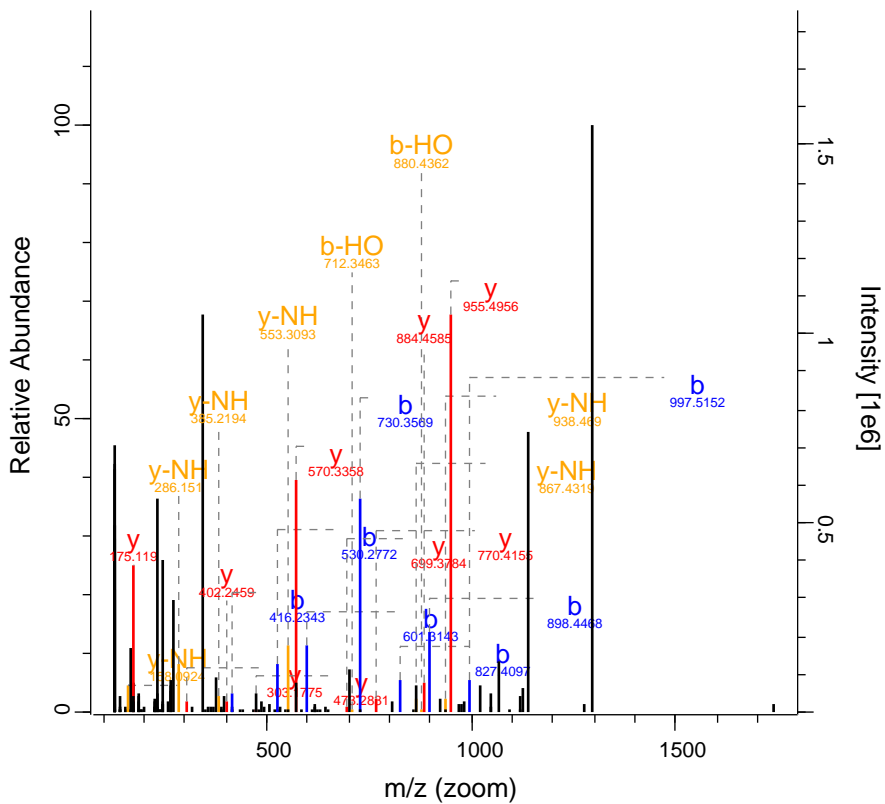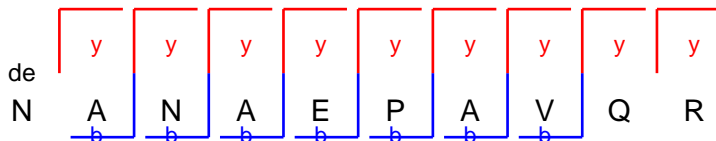

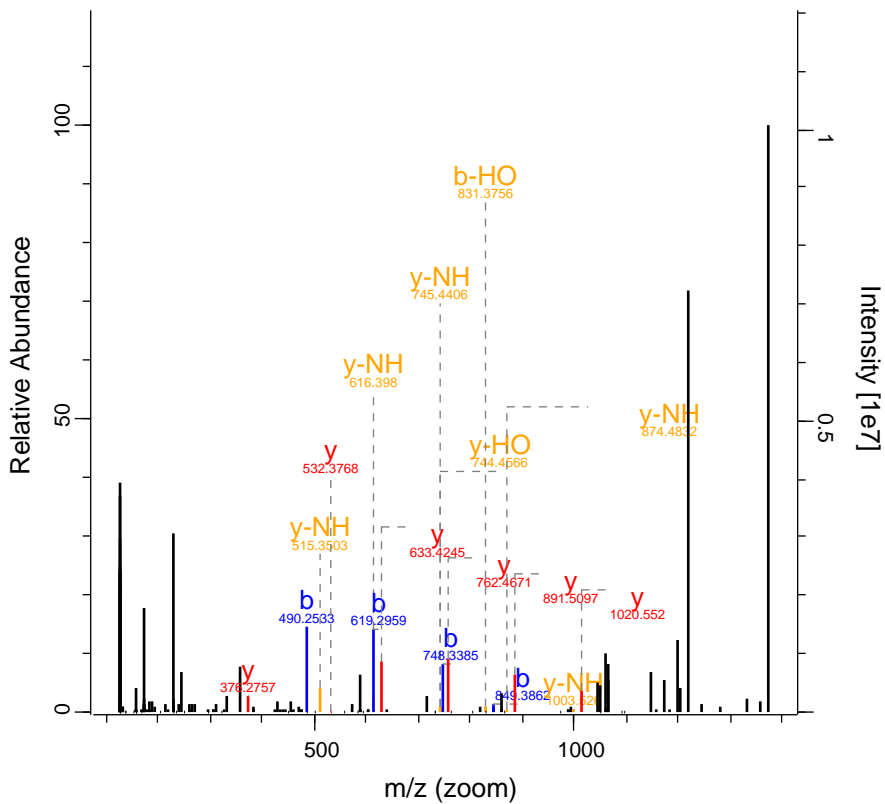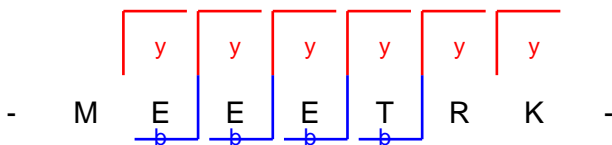





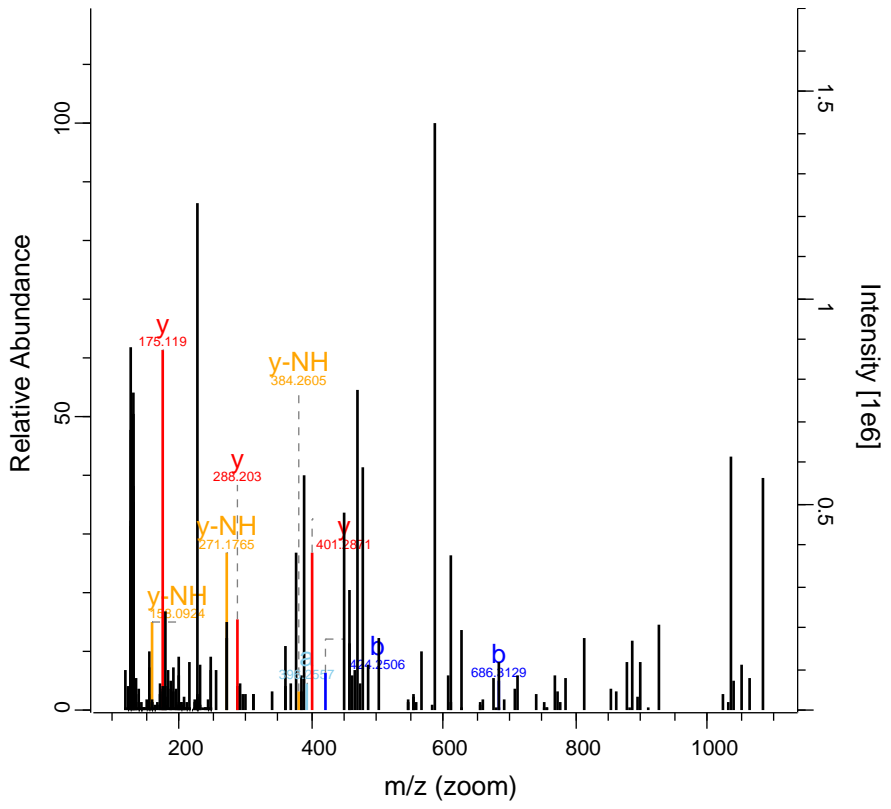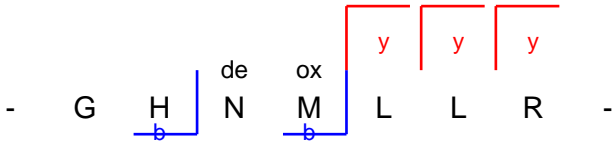

RO-QC-160121\_ZackD\_SS\_Set\_01\_Fraction 8397 FTMS; HC 44.45 809.89 ERVK-16

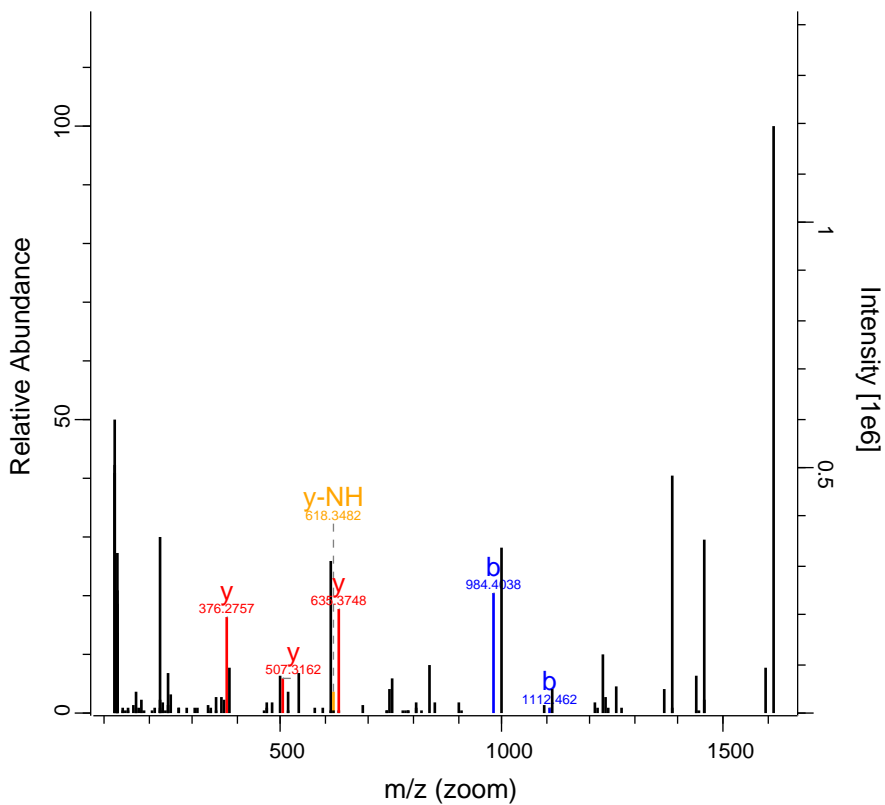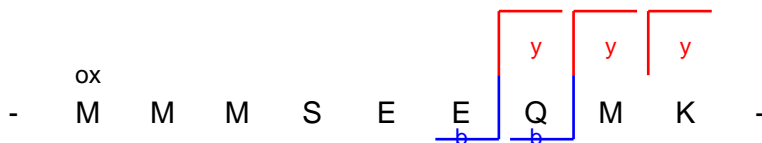

RO-QC-160121\_ZackD\_SS\_Set\_01\_Fraction1 11789 FTMS; HC 96.01 730.38 SLC16A10

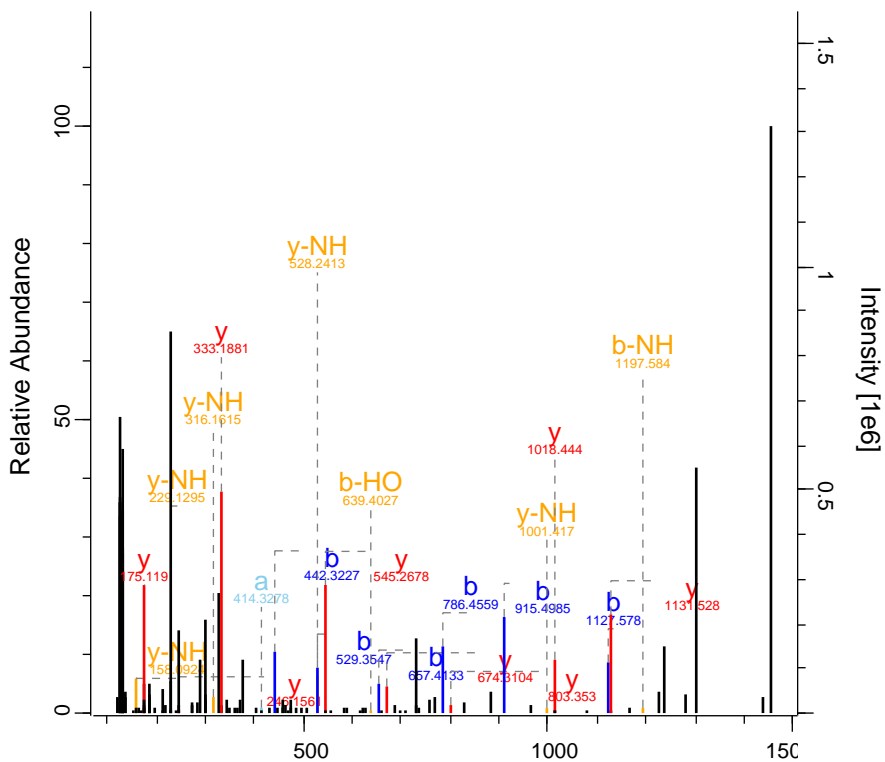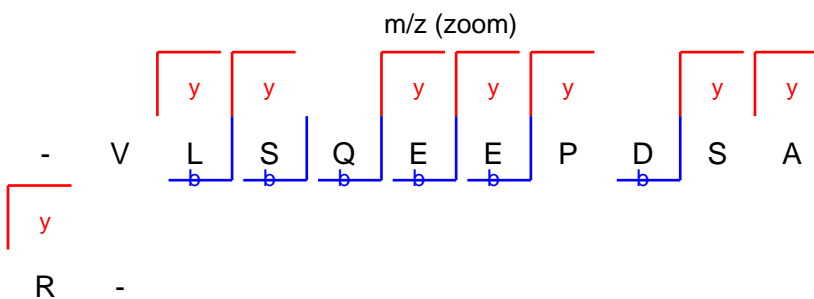

RO-QC-160121\_ZackD\_SS\_Set\_01\_Fraction 11844 FTMS; HC 44.69 729.45 SFMBT2

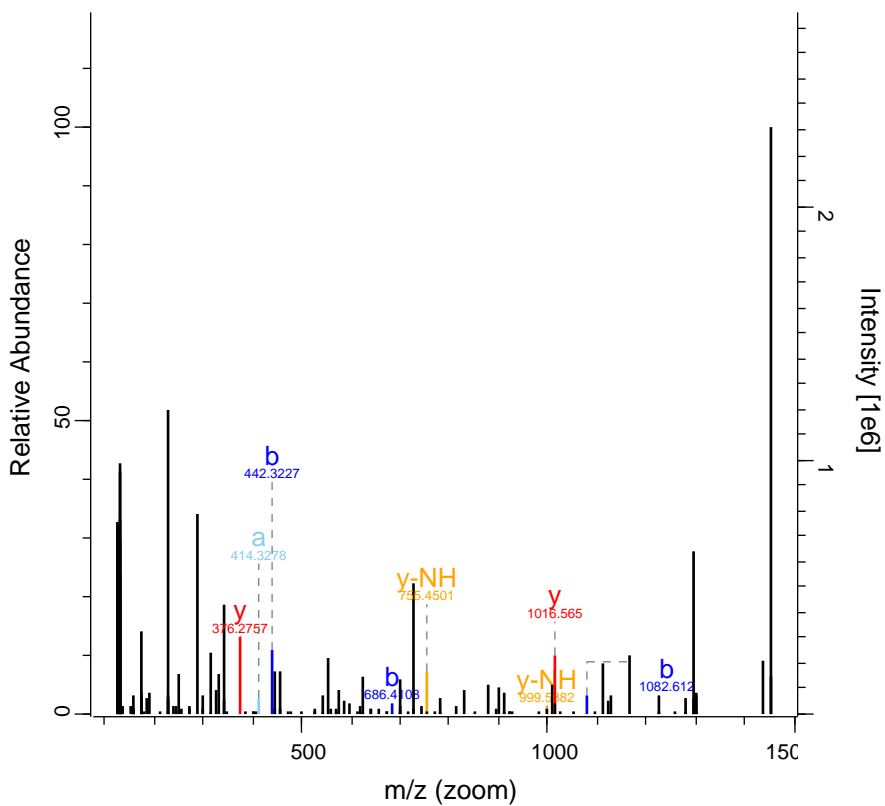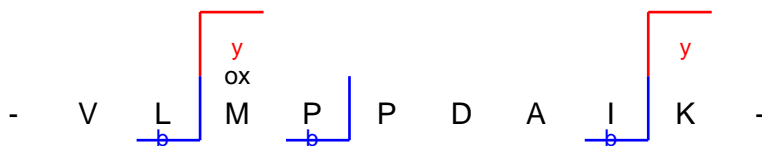

RO-QC-160121\_ZackD\_SS\_Set\_01\_Fraction 11865 FTMS; HC 202.57 798.37 FXVD1

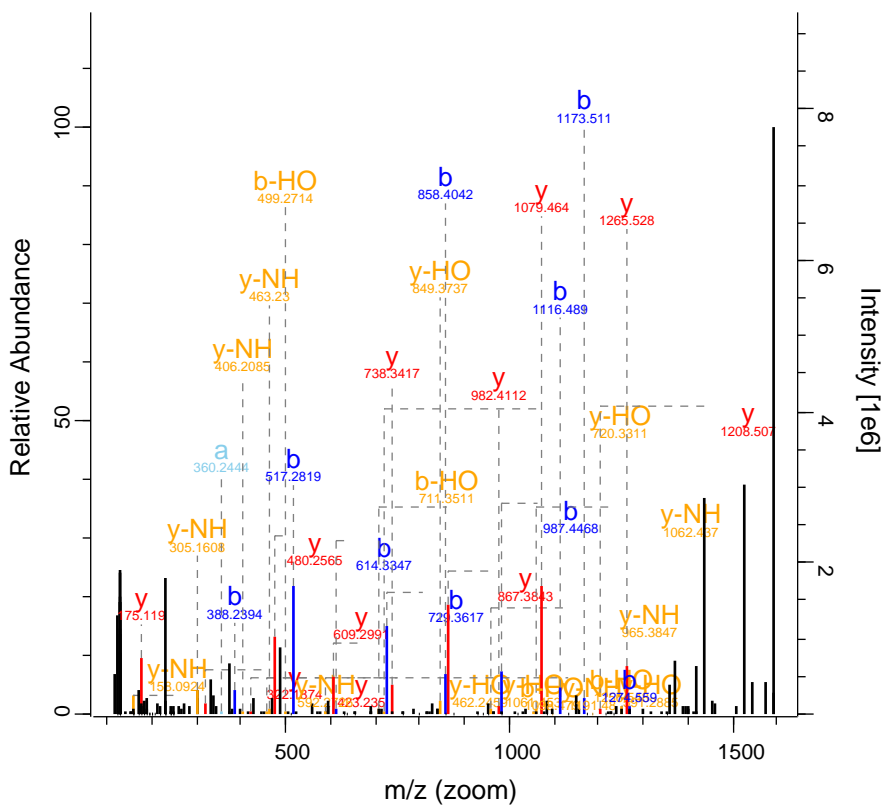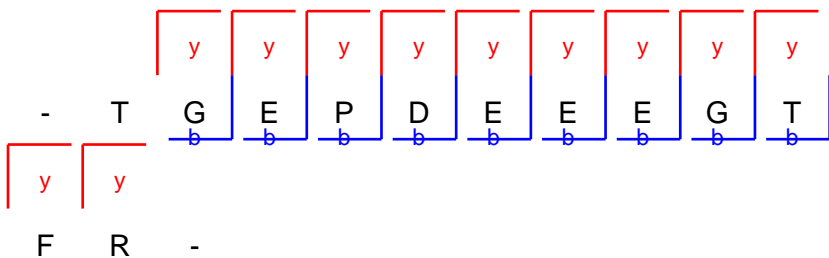

RO-QC-160121\_ZackD\_SS\_Set\_01\_Fraction12133 FTMS; HC 261.87 798.37 FXD1

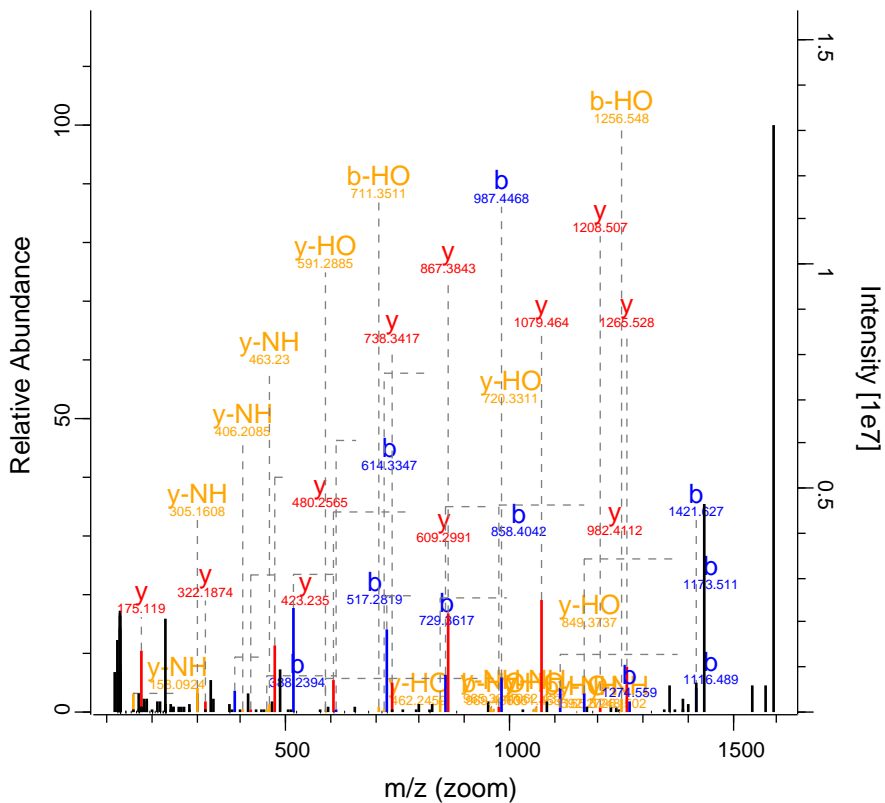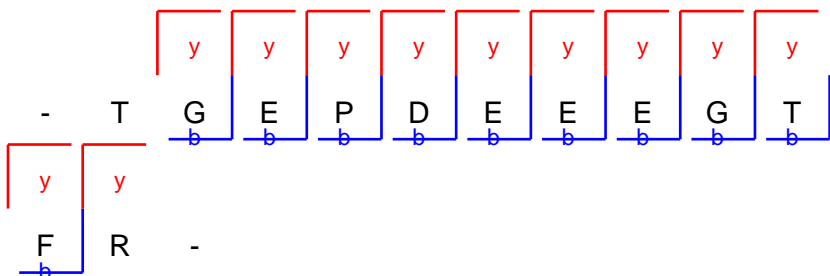

RO-QC-160121\_ZackD\_SS\_Set\_01\_Fraction13277 FTMS; HC 111.04 602.89 EXOC3L4

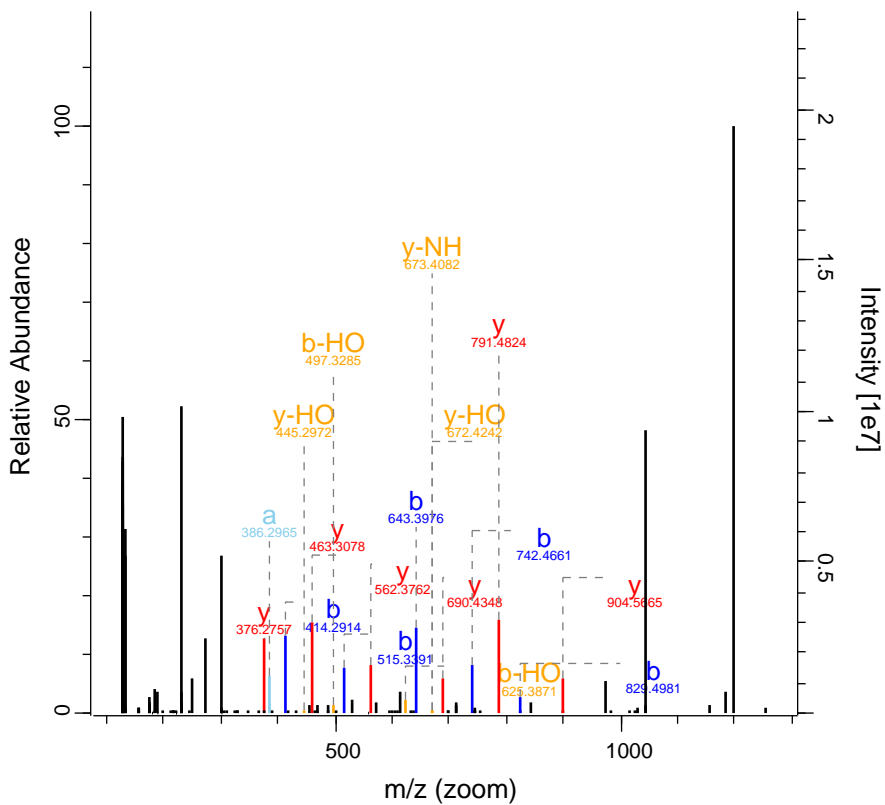

m/z (zoom)

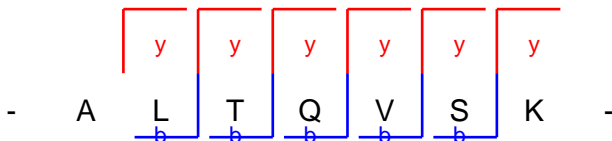

RO-QC-160121\_ZackD\_SS\_Set\_01\_Fraction 13410 FTMS; HC 58.98 402.26 EXOC3L4

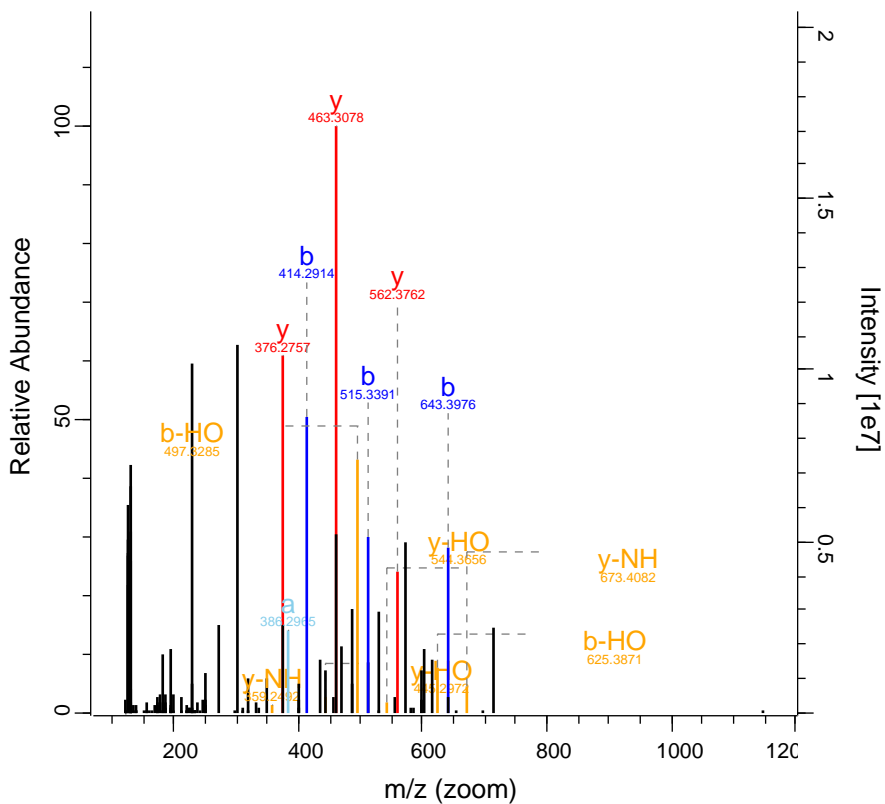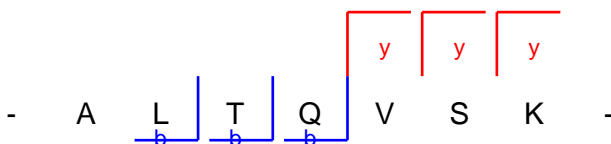



RO-QC-160121\_ZackD\_SS\_Set\_01\_Fraction 13612 FTMS; HC 65.25 715.38 TMIGD3

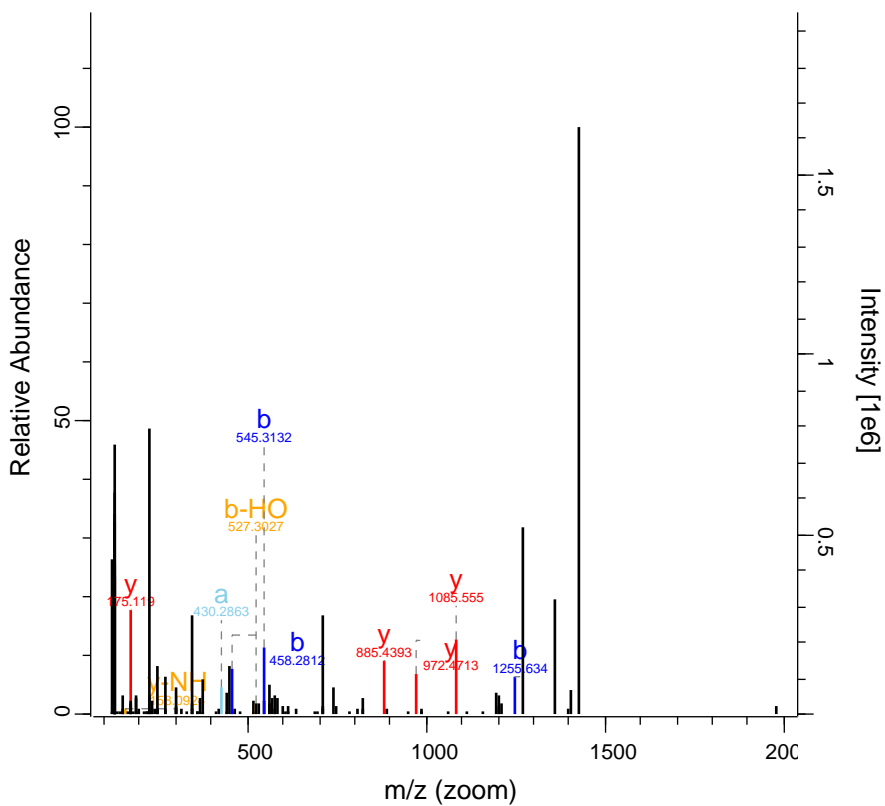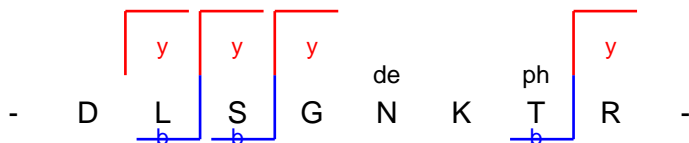

RO-QC-160121\_ZackD\_SS\_Set\_01\_Fraction1 13946 FTMS; HC 83.62 577.69 PEO1

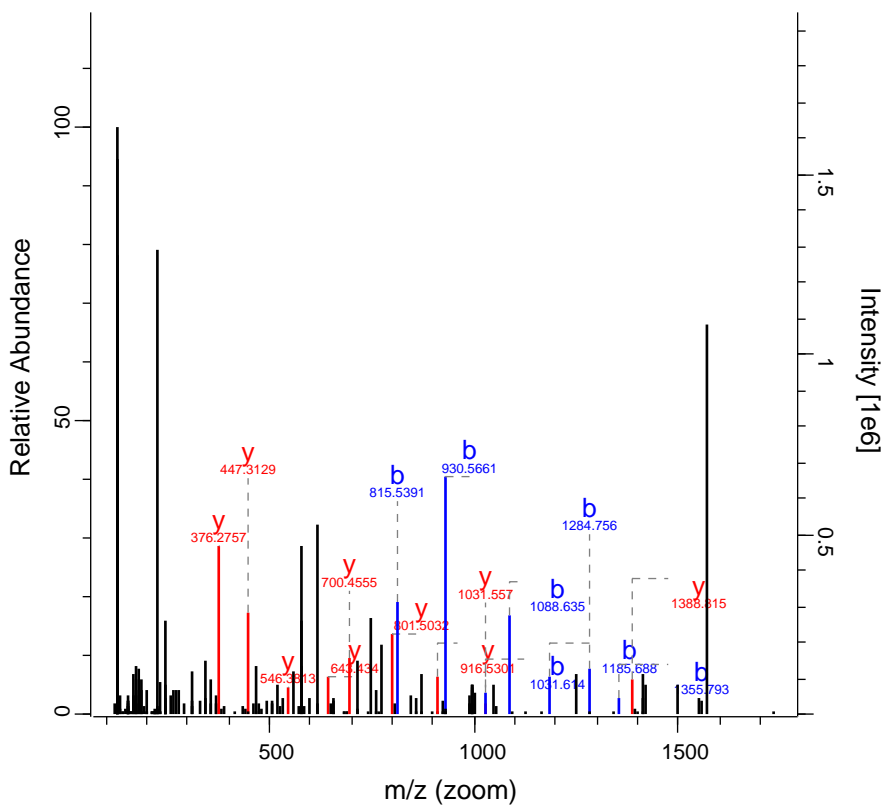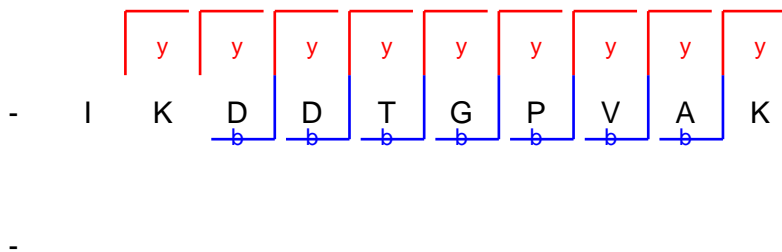

Raw File

Scan Method Score m/z

RO-QC-160121\_ZackD\_SS\_Set\_01\_Fraction\_10

14837 FTMS; HCD 49.36 378.21

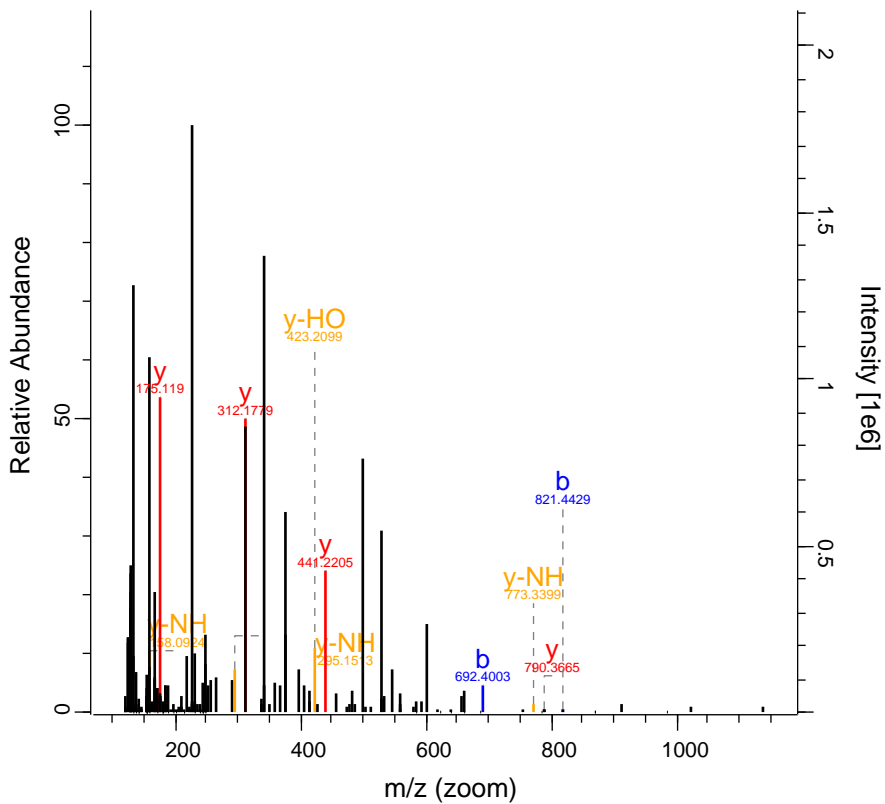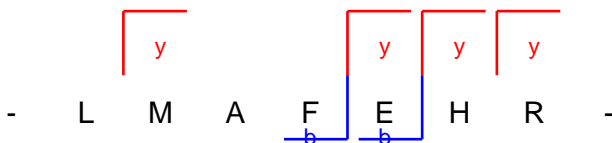

RO-QC-160121\_ZackD\_SS\_Set\_01\_Fraction 15081 FTMS; HC 77.68 413.57 TAF12

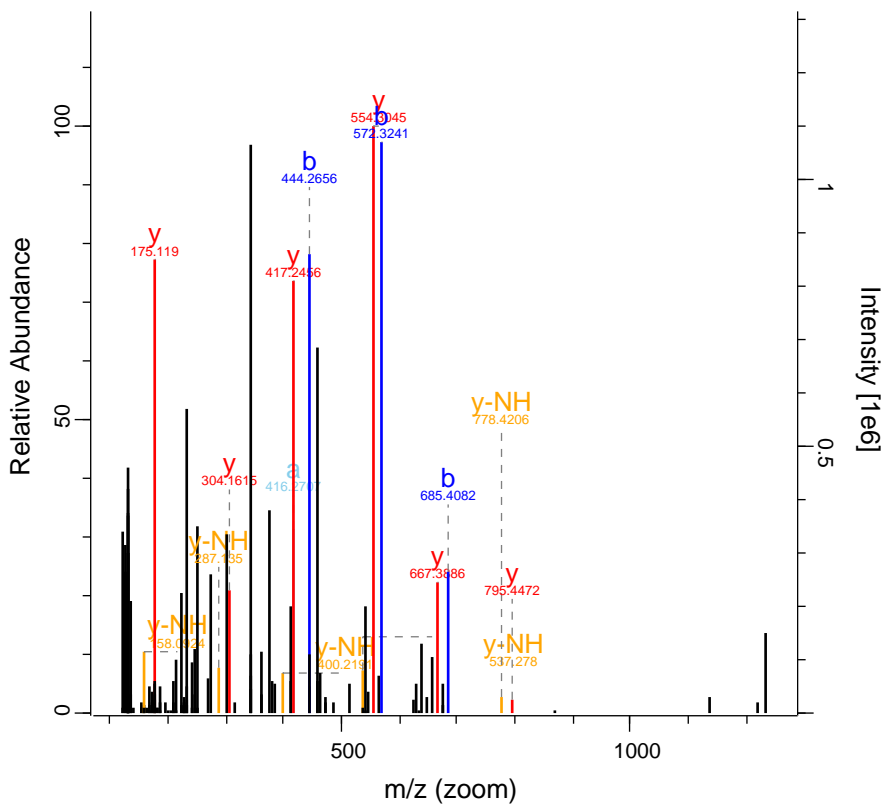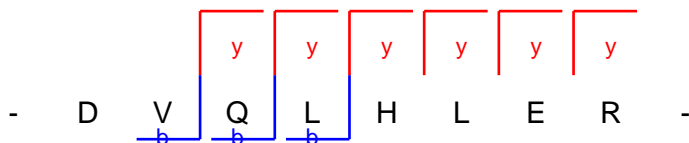

RO-QC-160121\_ZackD\_SS\_Set\_01\_Fraction1 15367 FTMS; HC 150.35 719.89 CYSTM1

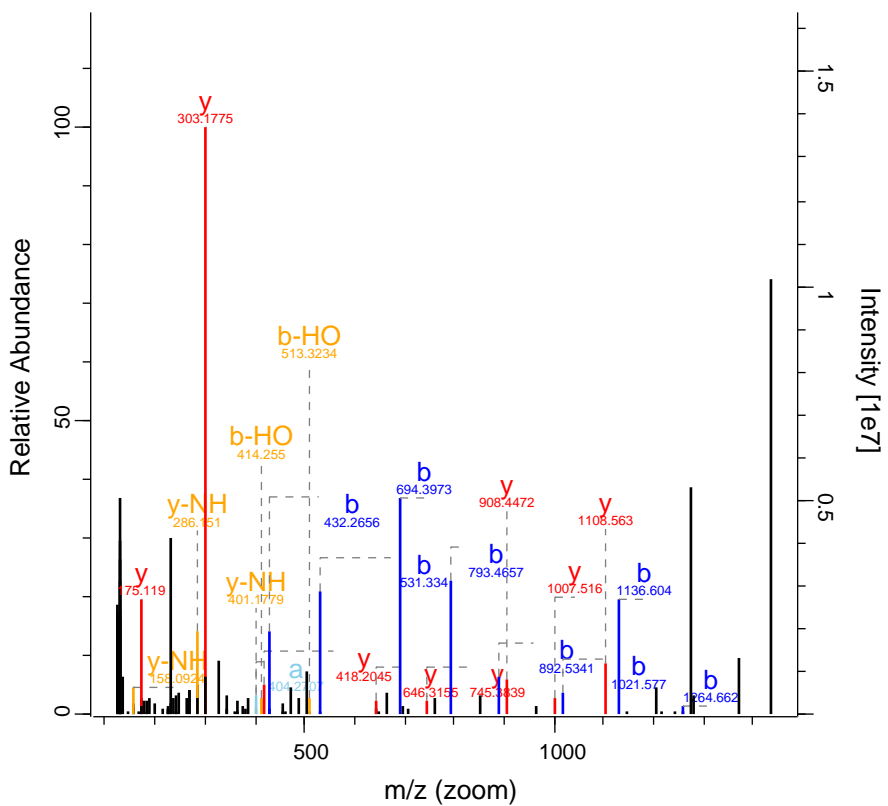

m/z (zoom)

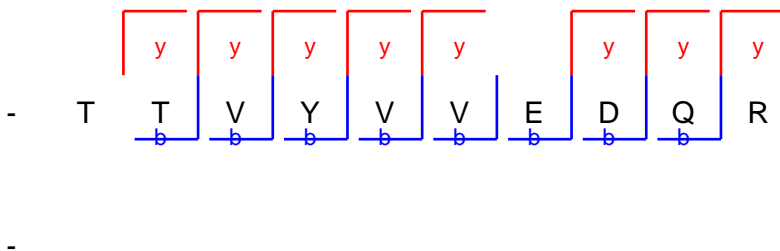



RO-QC-160121\_ZackD\_SS\_Set\_01\_Fraction15497 FTMS; HC 131.54 905.49 ZNF385A

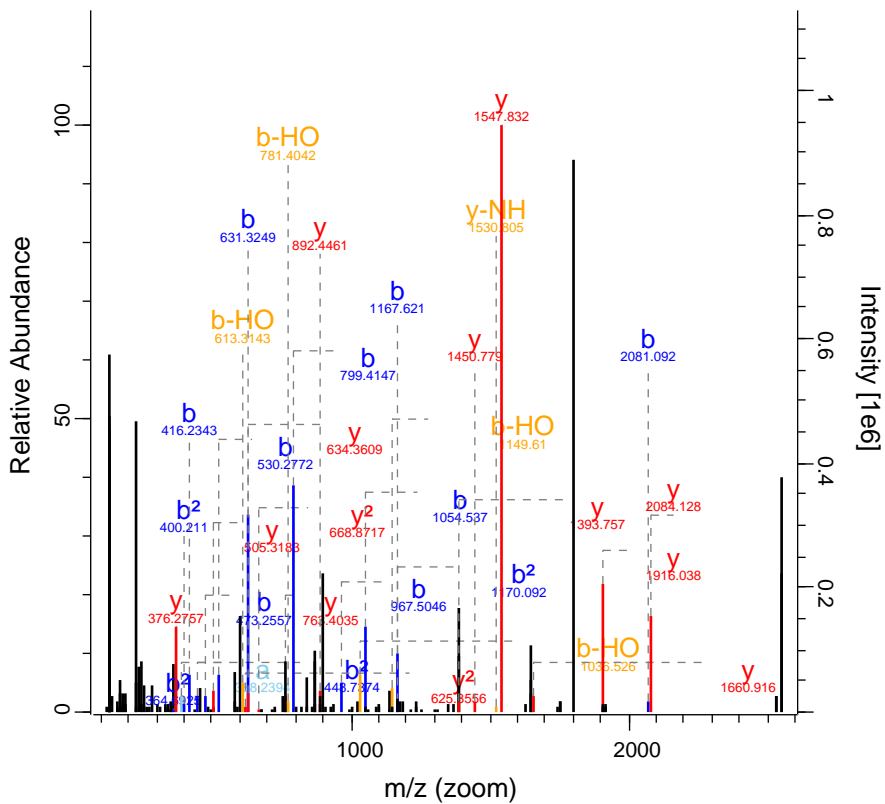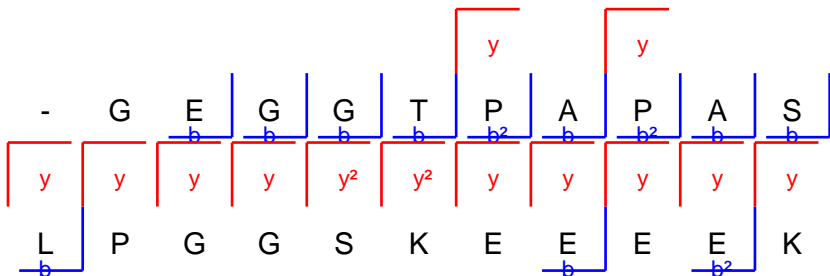





RO-QC-160121\_ZackD\_SS\_Set\_01\_Fraction16211 FTMS; HC 53.17 586.97 HBA1

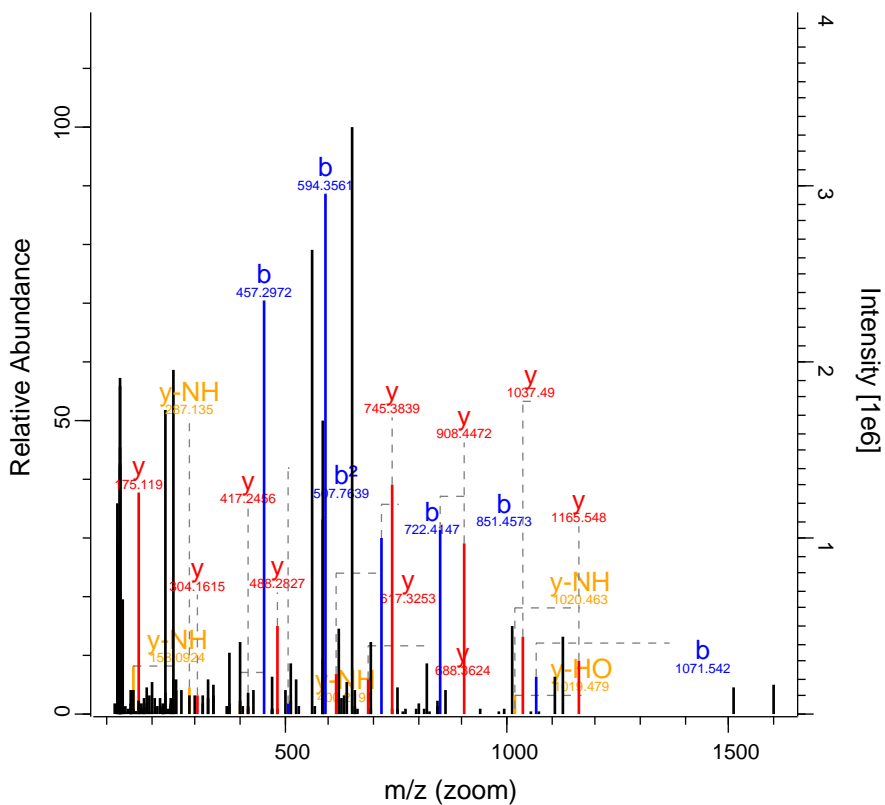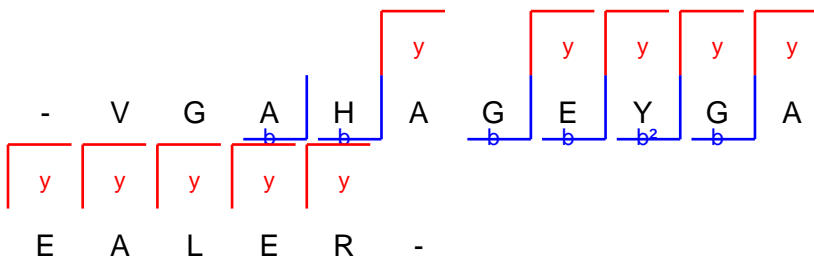



RO-QC-160121\_ZackD\_SS\_Set\_01\_Fraction 16997 FTMS; HC 71.38 608.34 UTS2

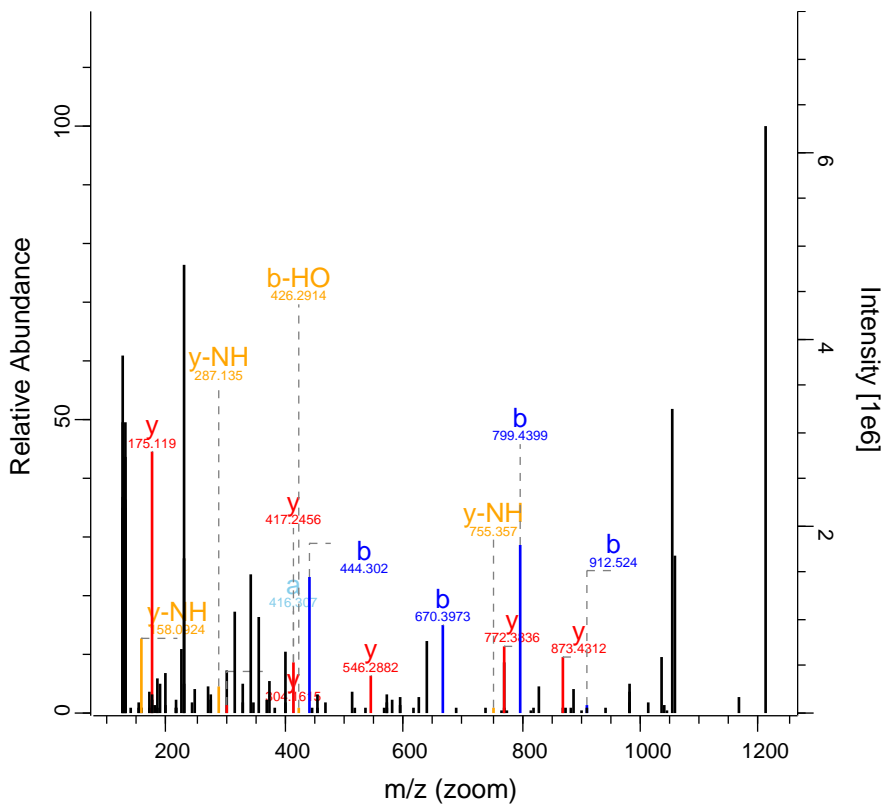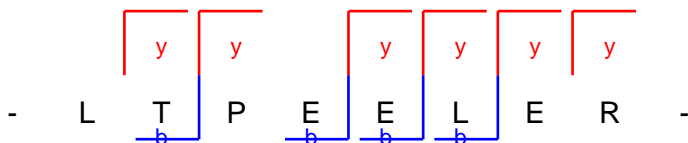

Raw File

Scan Method Score m/z

RO-QC-160121\_ZackD\_SS\_Set\_01\_Fraction\_10

18681 FTMS; HCD 81.78 587.39

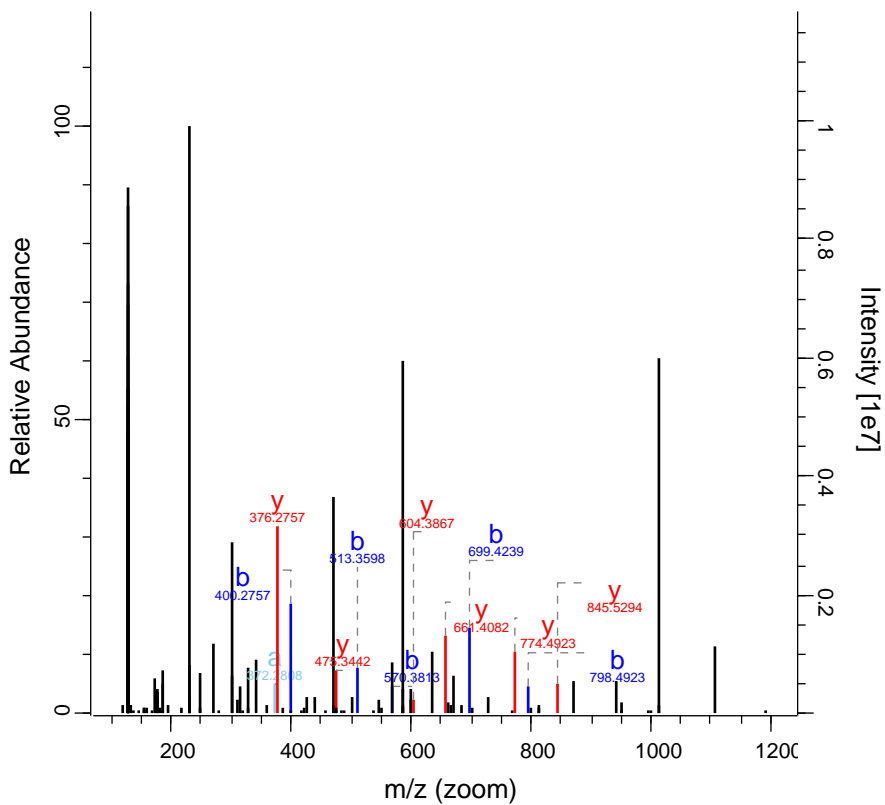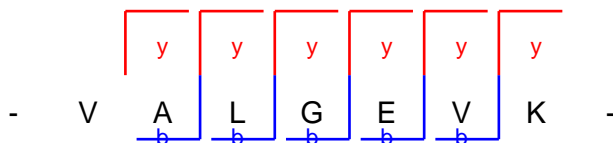

Raw File

Scan Method Score m/z

RO-QC-160121\_ZackD\_SS\_Set\_01\_Fraction\_10

18742 FTMS; HCD 99.92 391.93

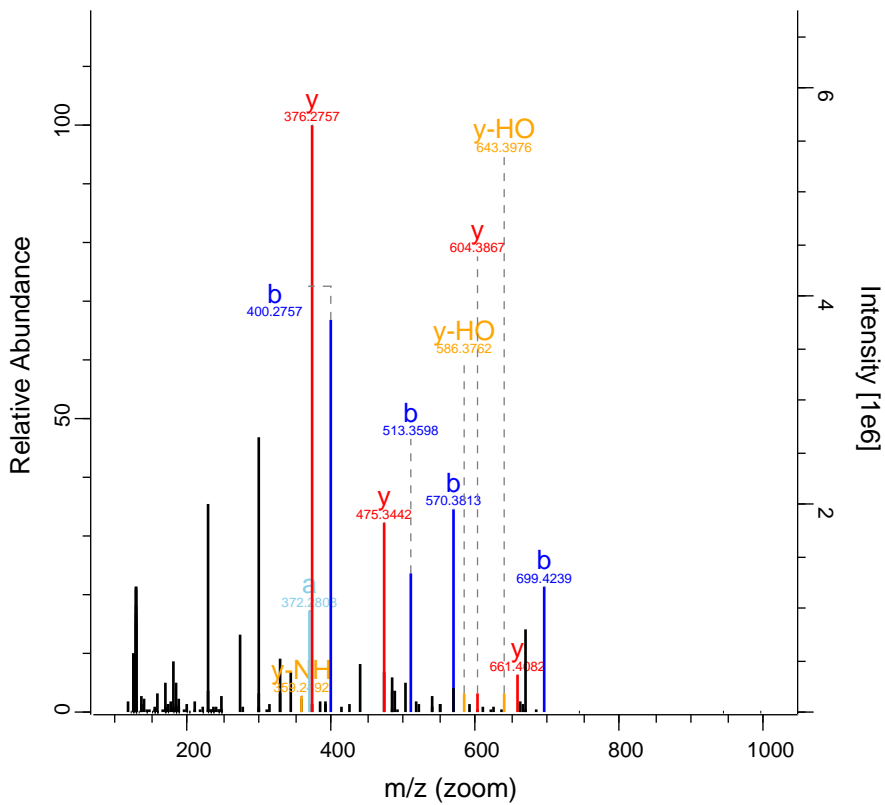

m/z (zoom)

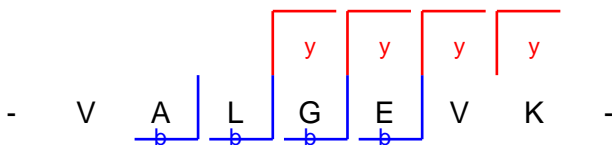

RO-QC-160121\_ZackD\_SS\_Set\_01\_Fraction 18835 FTMS; HC 68.02 721.92 PPP1R2P1

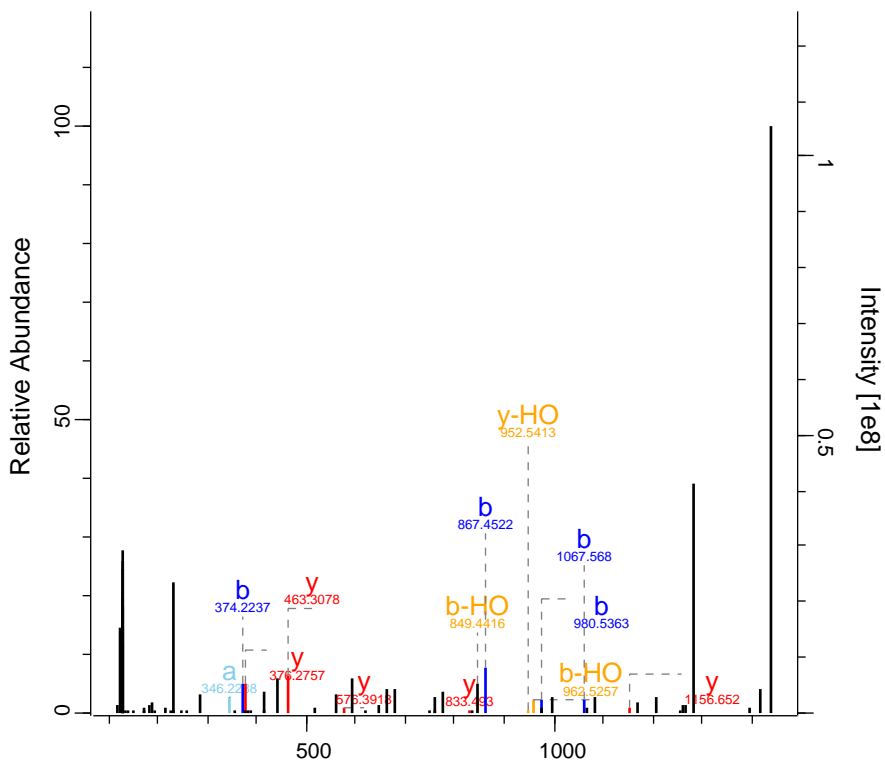

m/z (zoom)

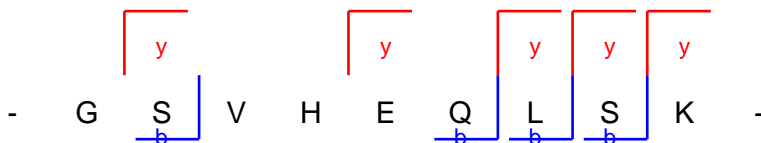

RO-QC-160121\_ZackD\_SS\_Set\_01\_Fraction\_10 19013 FTMS; HCD 94.16 391.92

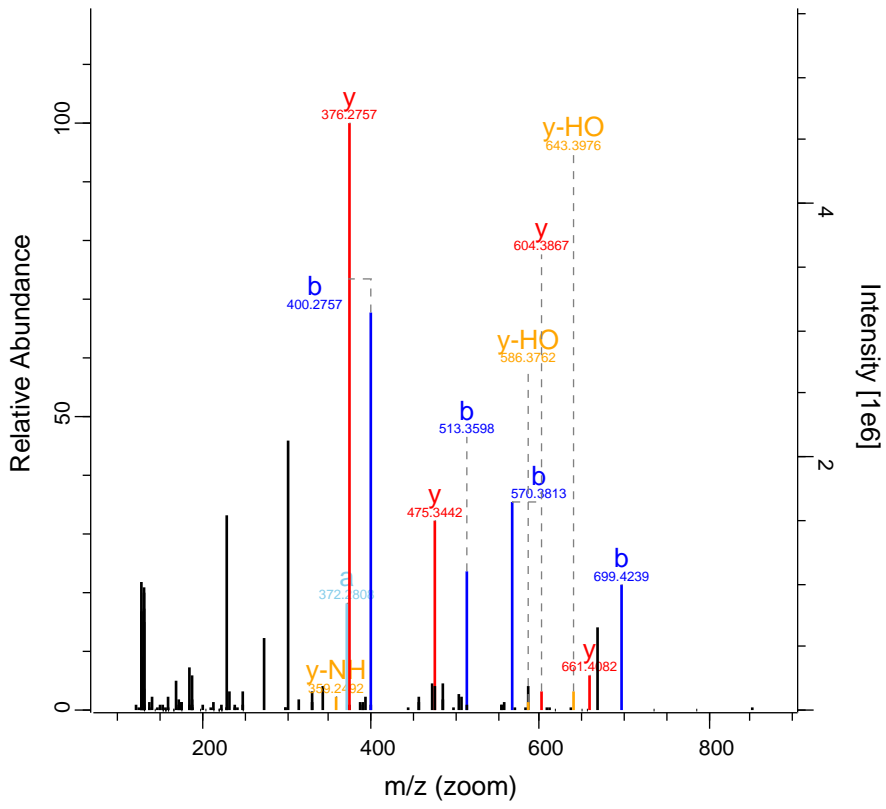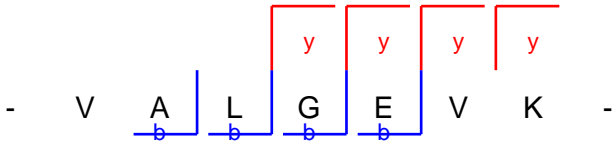

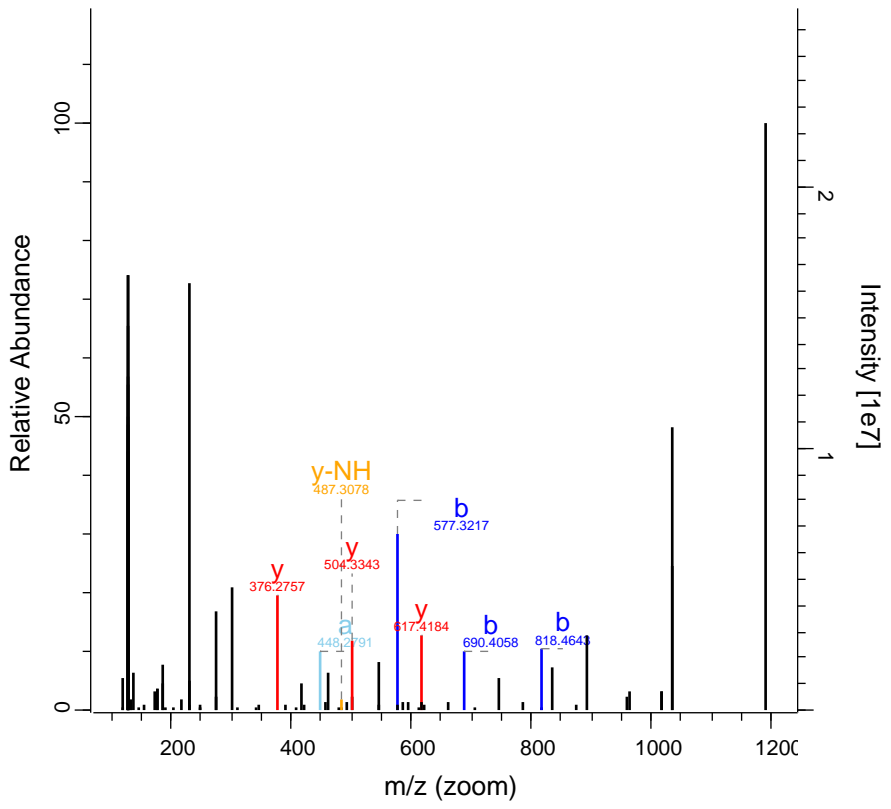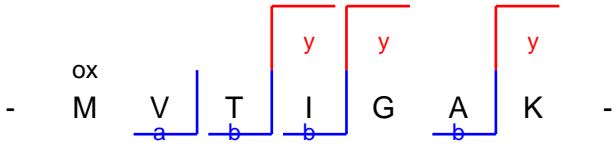



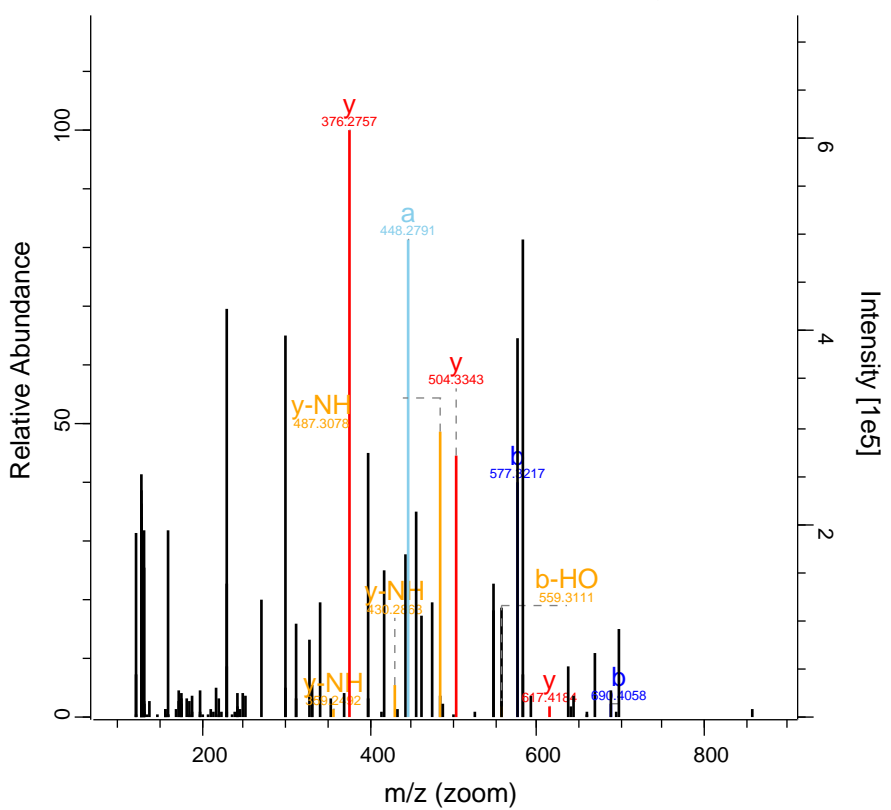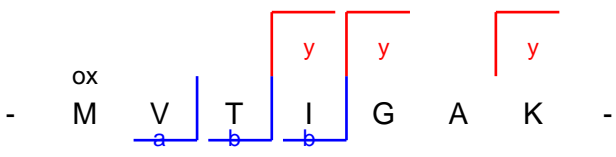

RO-QC-160121\_ZackD\_SS\_Set\_01\_Fraction 24277 FTMS; HC 140.95 989.2 DPY19L3

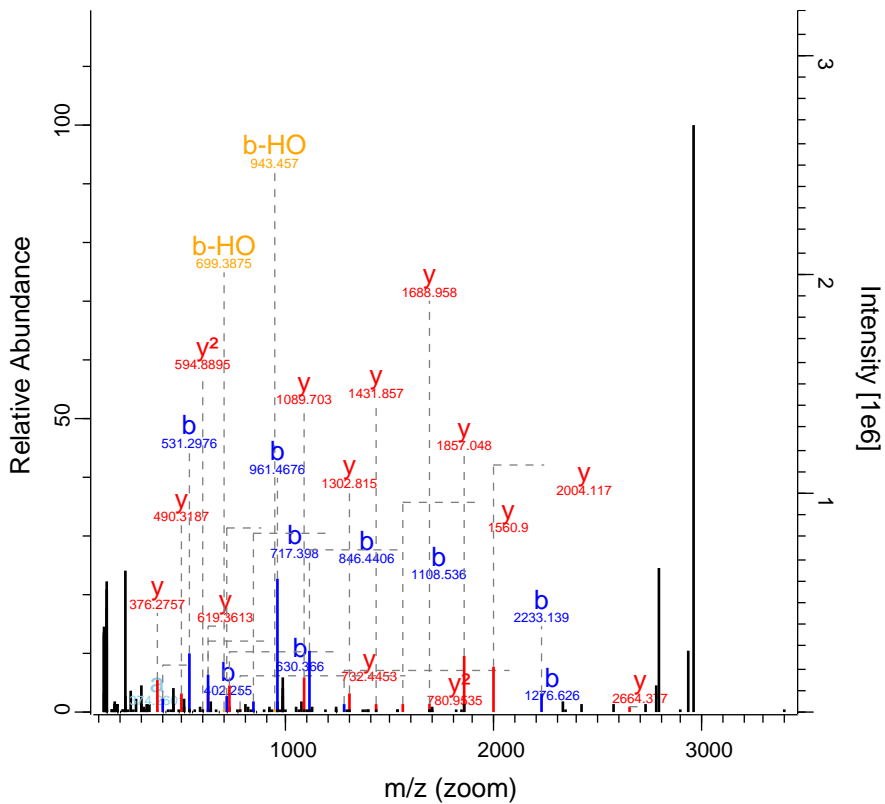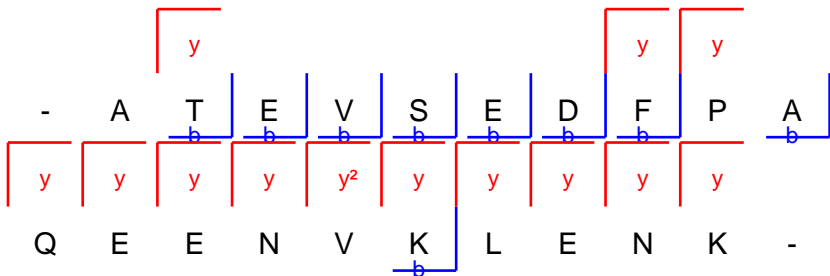

RO-QC-160121\_ZackD\_SS\_Set\_01\_Fraction 24371 FTMS; HC 141.2 708.92 ALG12

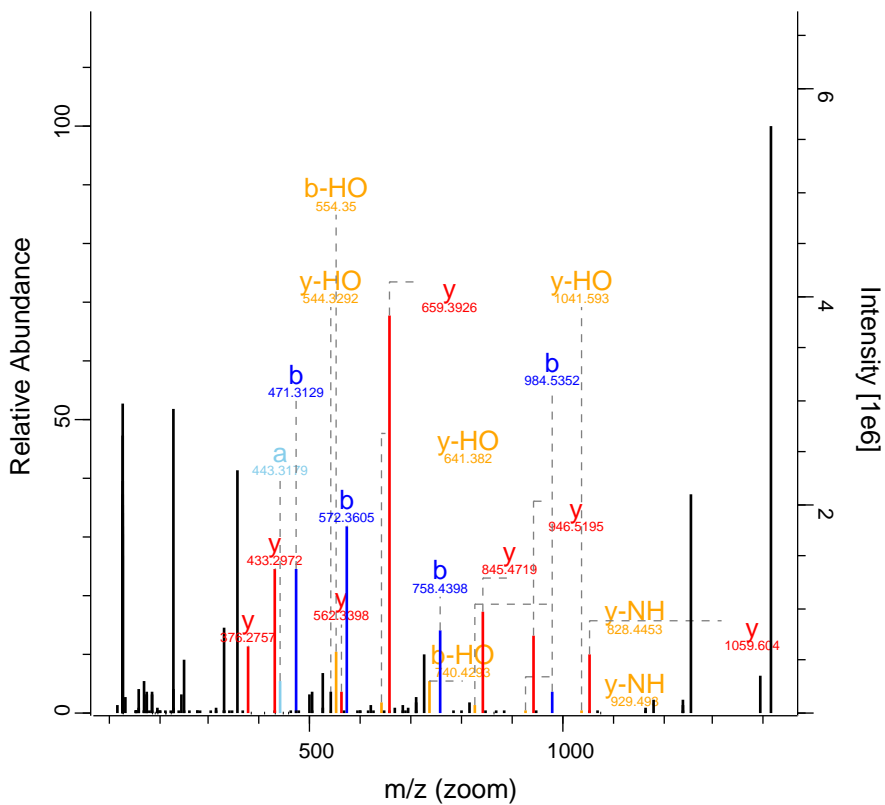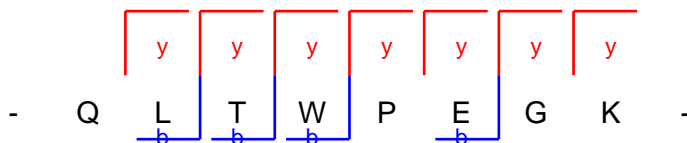





Raw File

Scan Method Score m/z

RO-QC-160121\_ZackD\_SS\_Set\_01\_Fraction\_10

24950 FTMS; HCD 102.72 637.91

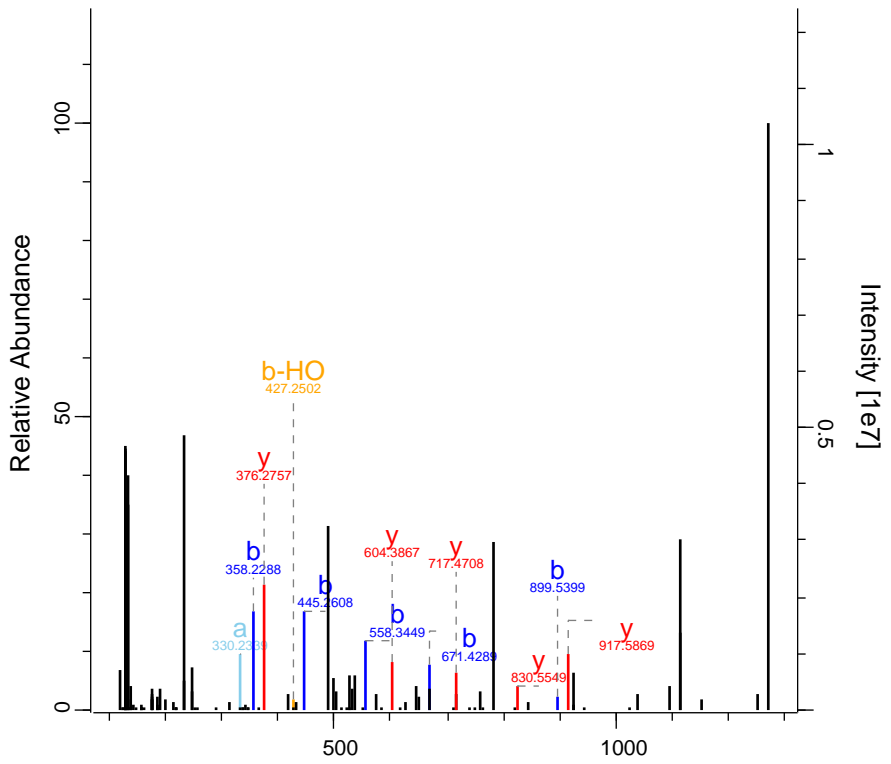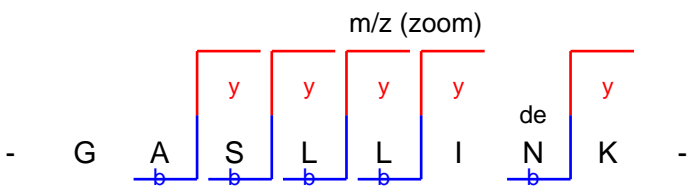

RO-QC-160121\_ZackD\_SS\_Set\_01\_Fraction 25288 FTMS; HC 45.86 611.56 HOXD8

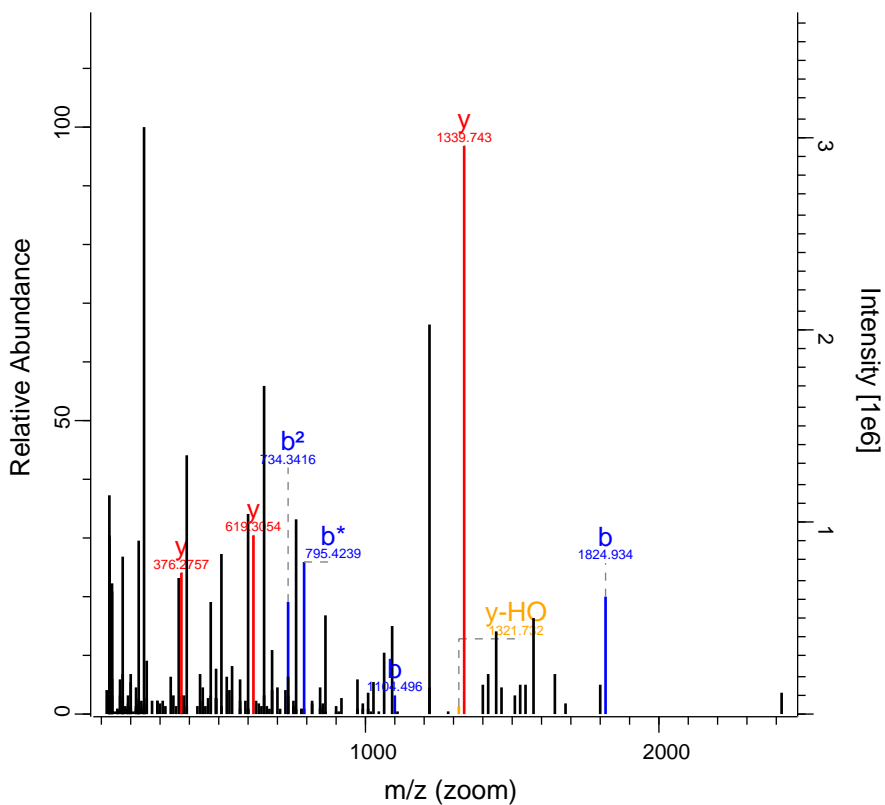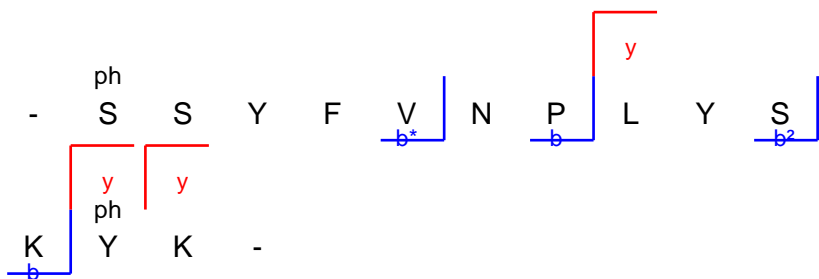

RO-QC-160121\_ZackD\_SS\_Set\_01\_Fraction 26976 FTMS; HC 93.78 819.12 LMO4

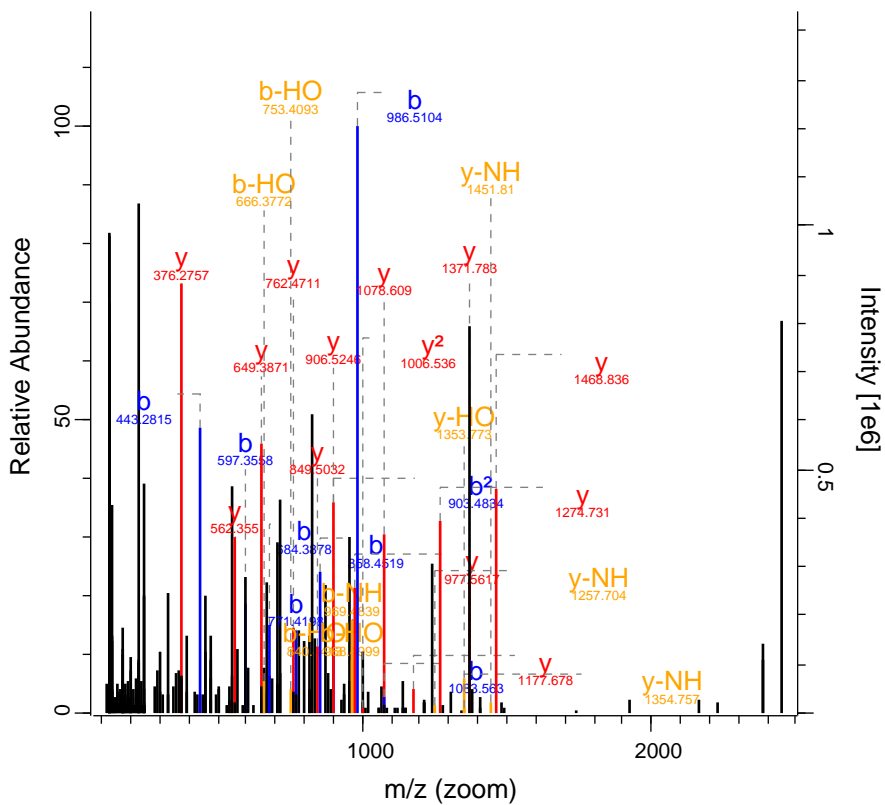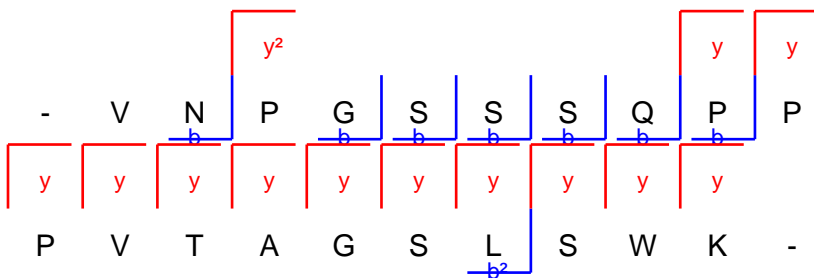



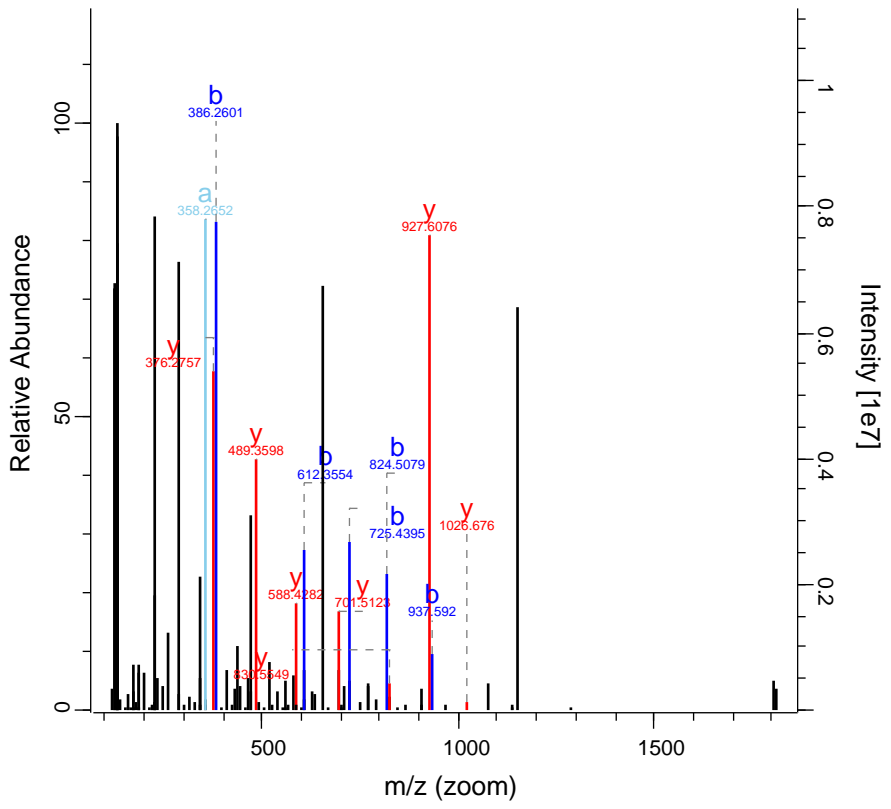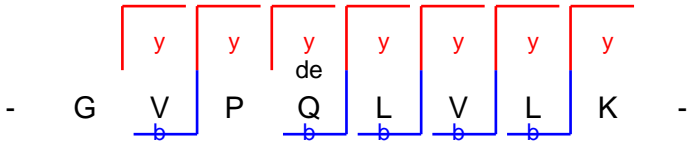

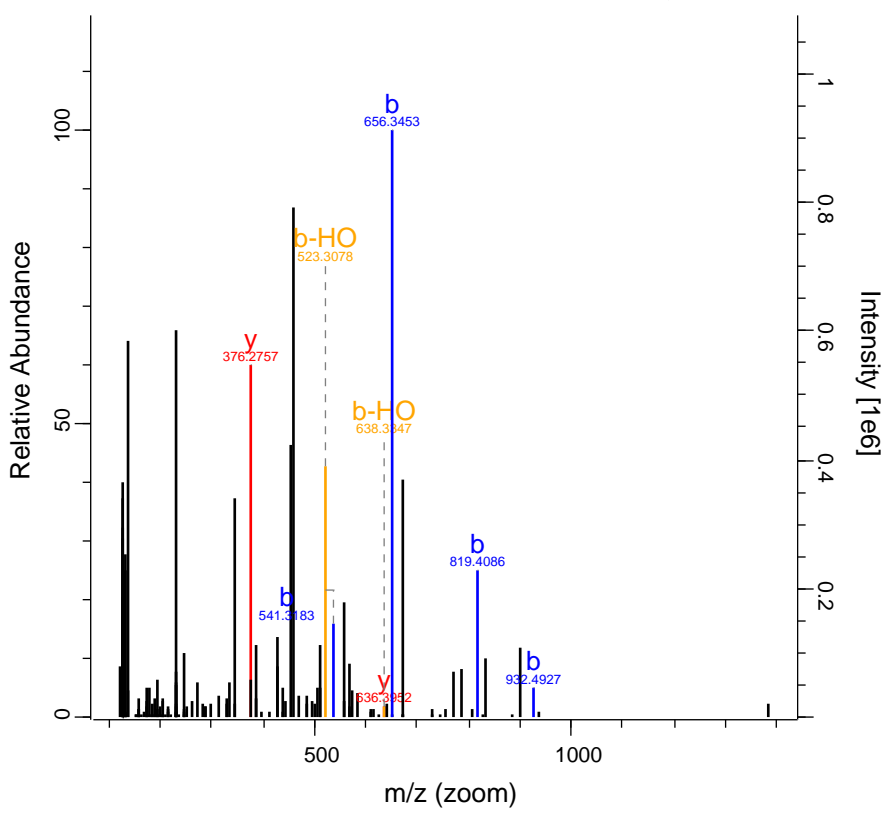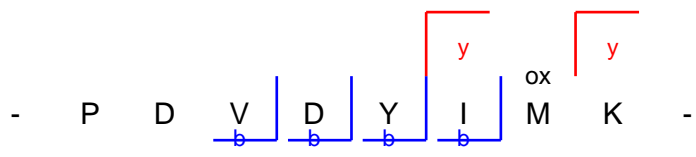

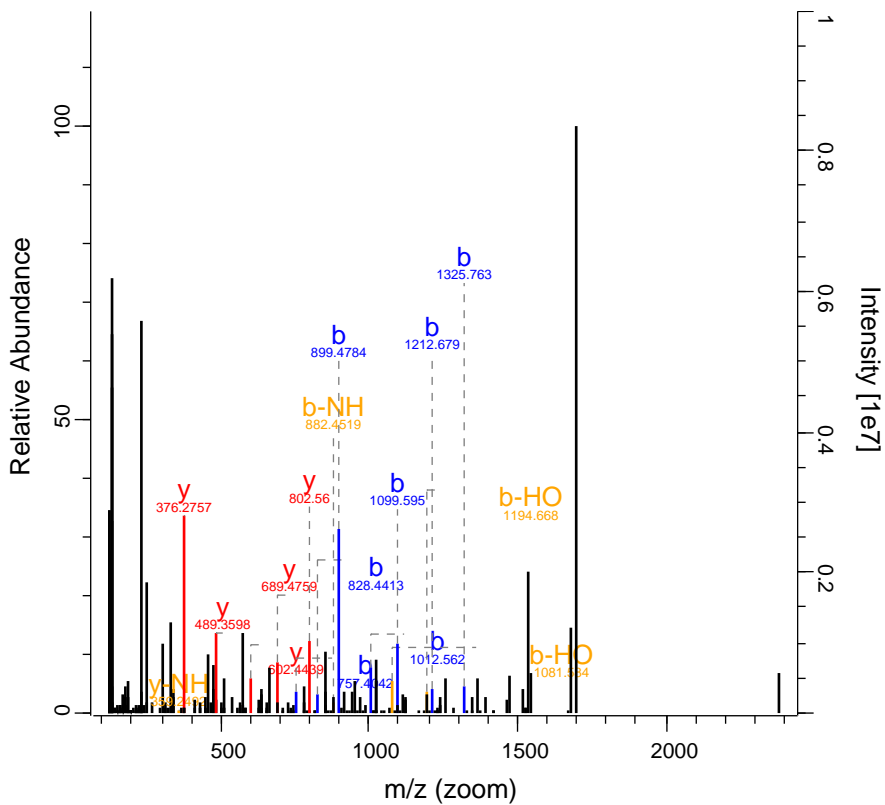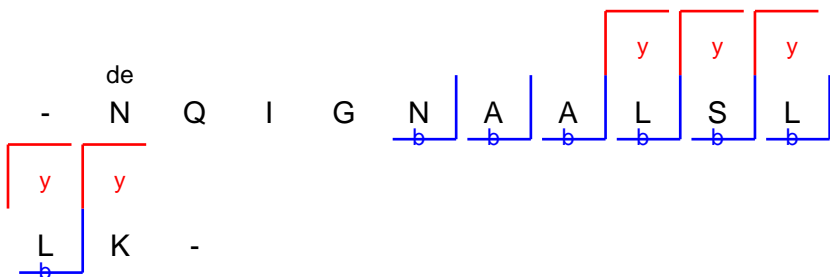

Raw File

Scan Method Score m/z

RO-QC-160121\_ZackD\_SS\_Set\_01\_Fraction\_10

29981 FTMS; HCD 49.3 568.64

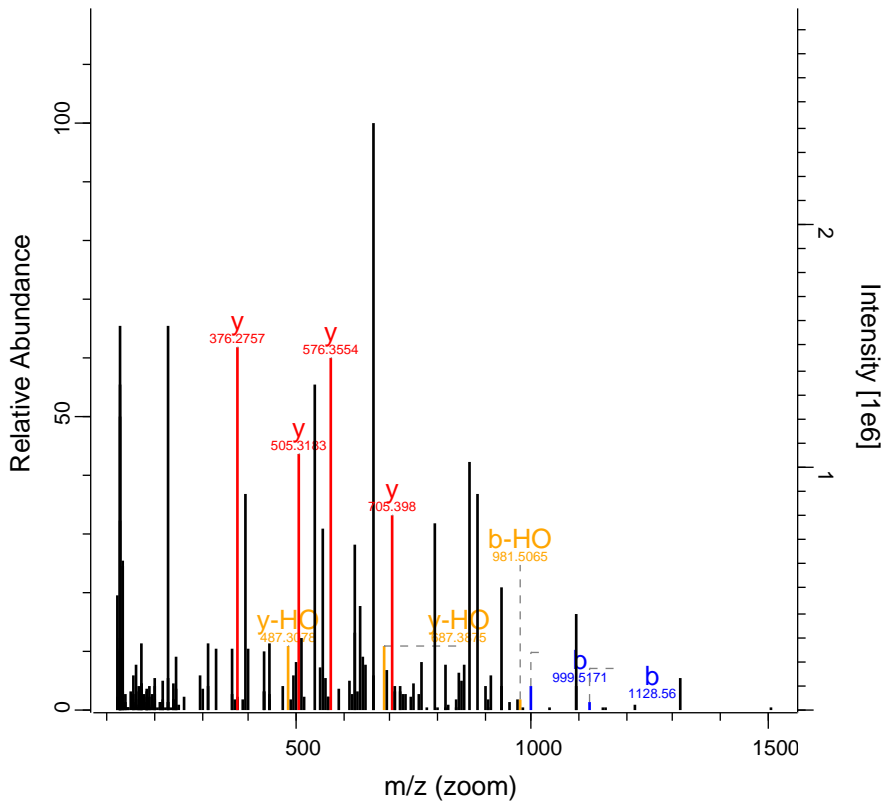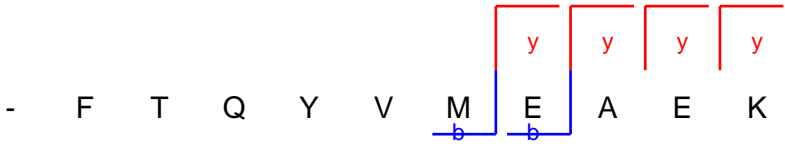



RO-QC-160121\_ZackD\_SS\_Set\_01\_Fraction 30502 FTMS; HC 50.21 716.77 DRC7

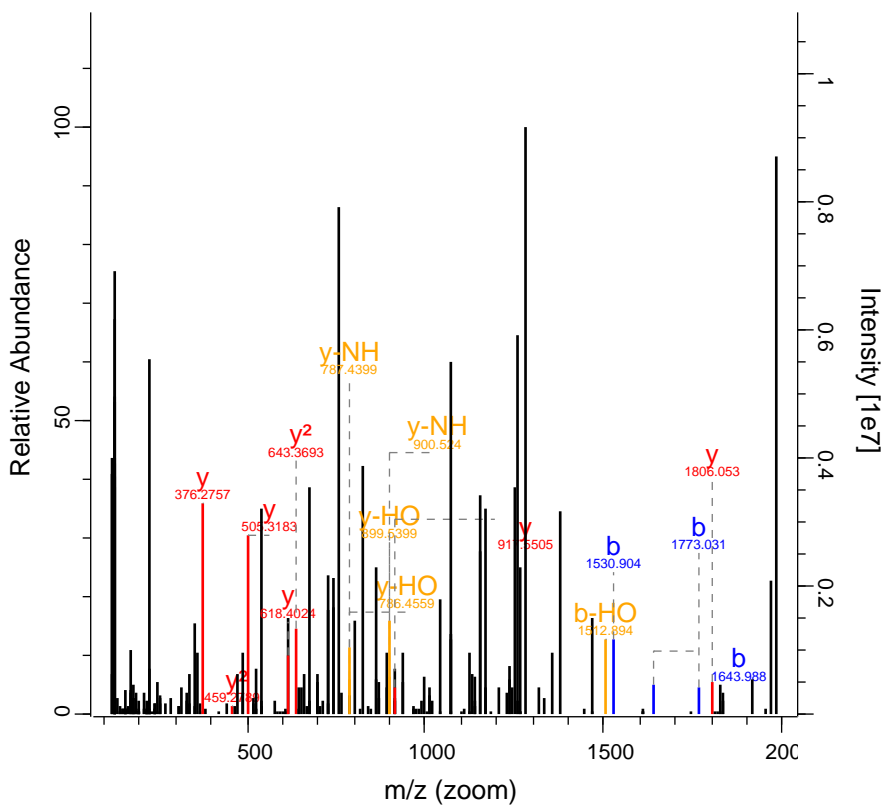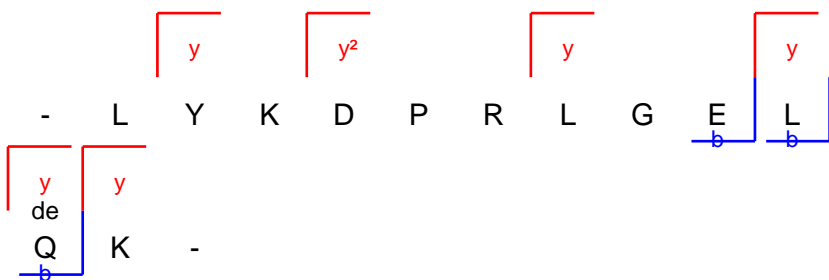

RO-QC-160121\_ZackD\_SS\_Set\_01\_Fraction1 30764 FTMS; HC 139.86 938.99 PHF23

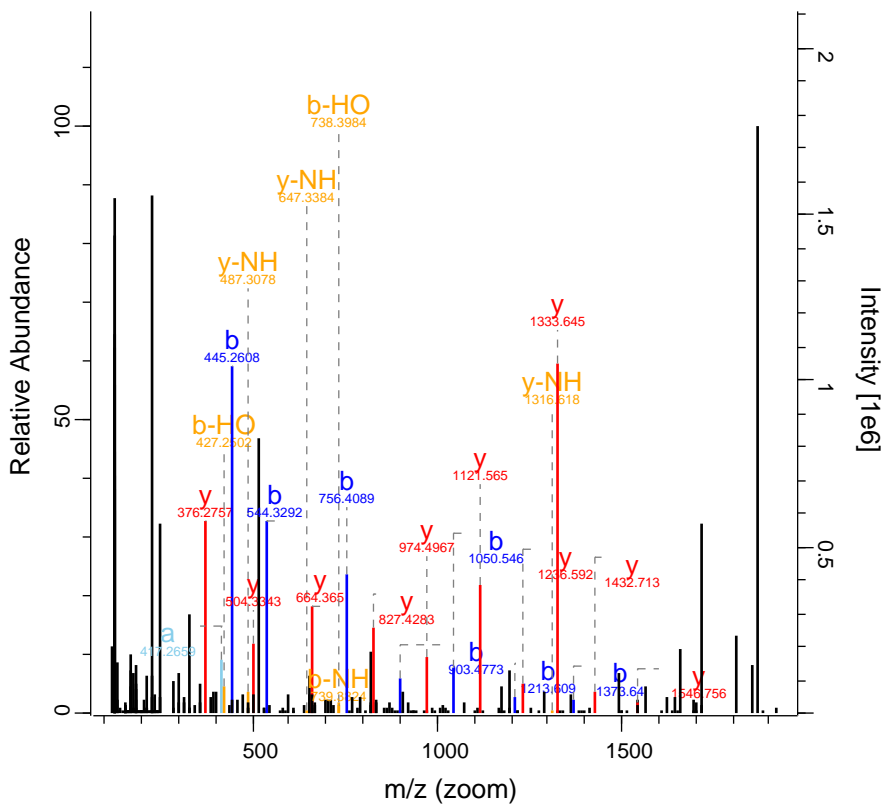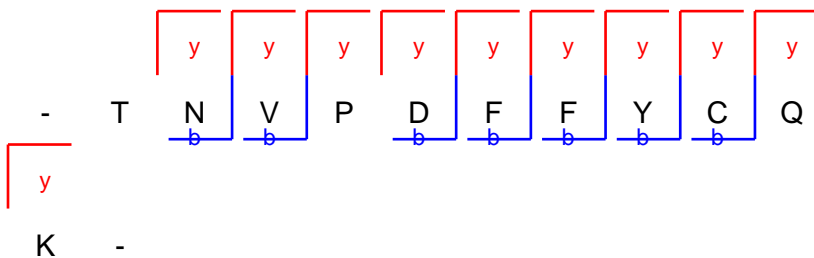

RO-QC-160121\_ZackD\_SS\_Set\_01\_Fraction 30781 FTMS; HC 71.08 626.33 PHF23

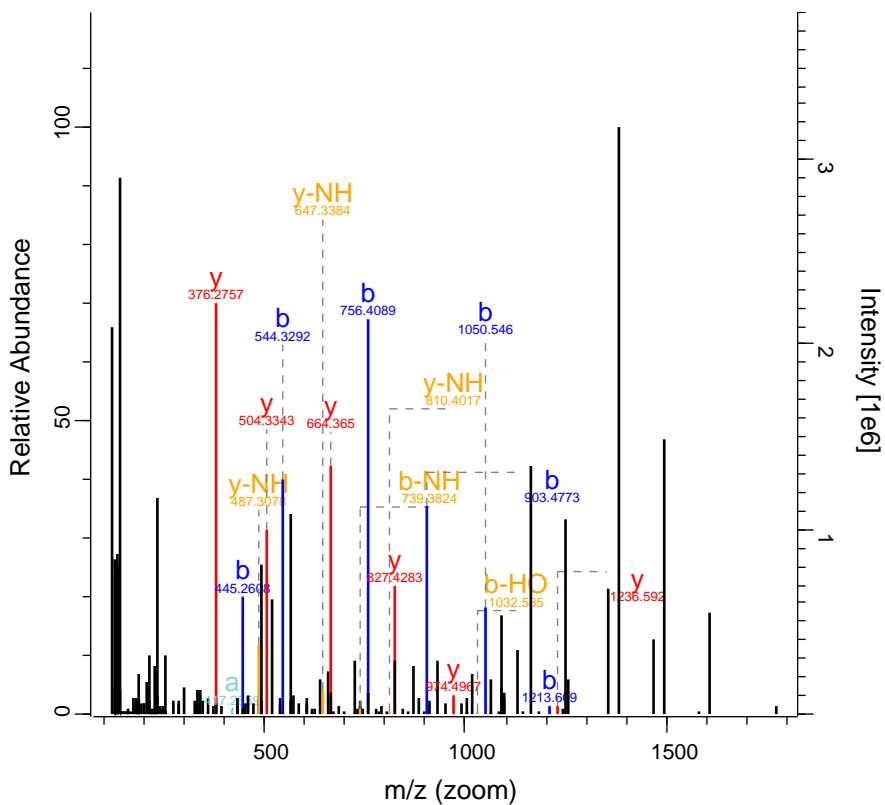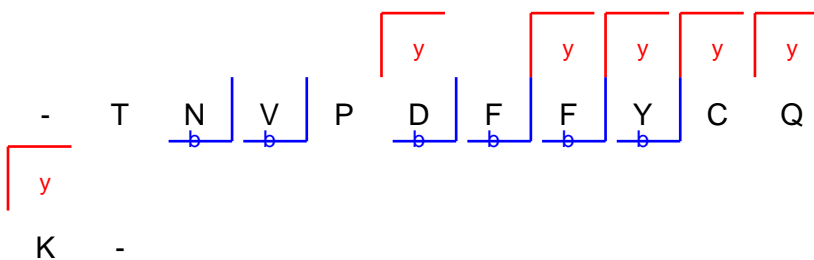



RO-QC-160121\_ZackD\_SS\_Set\_01\_Fraction 31927 FTMS; HC 93.75 813.75 HN1

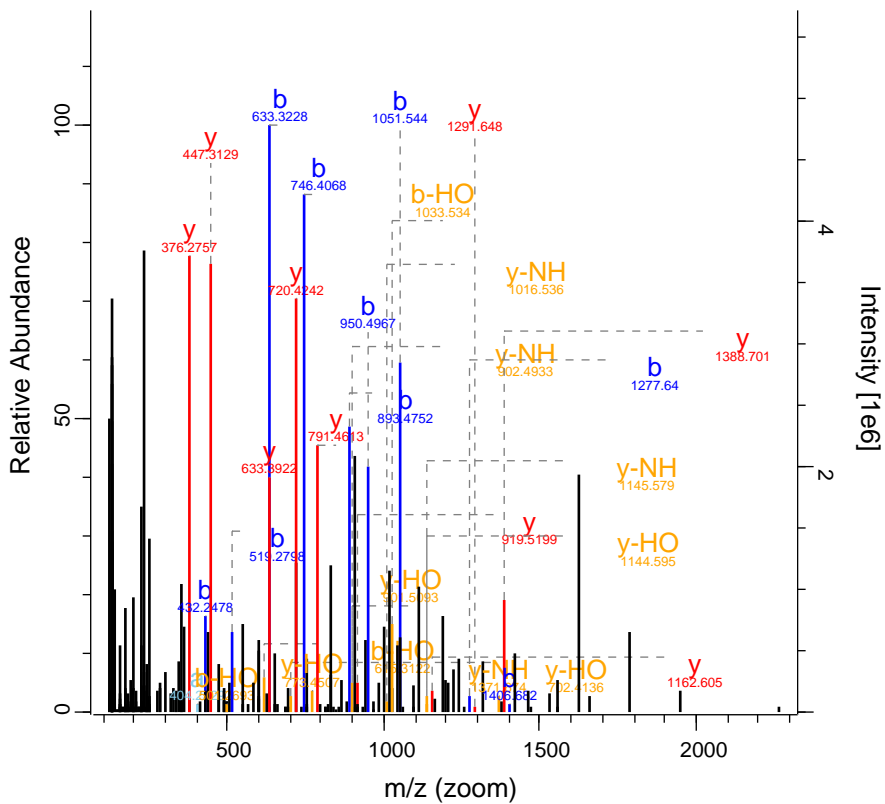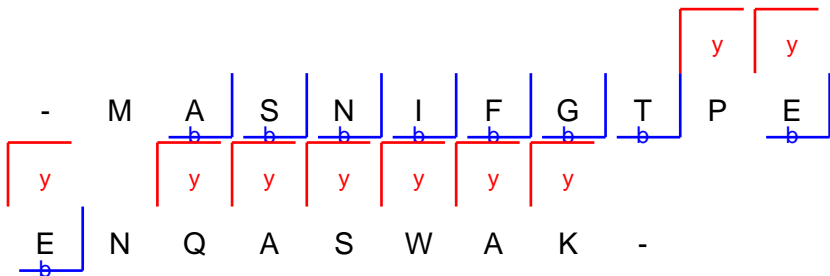

RO-QC-160121\_ZackD\_SS\_Set\_01\_Fratio 31968 FTMS; HC 243.92 1220.63 HN1

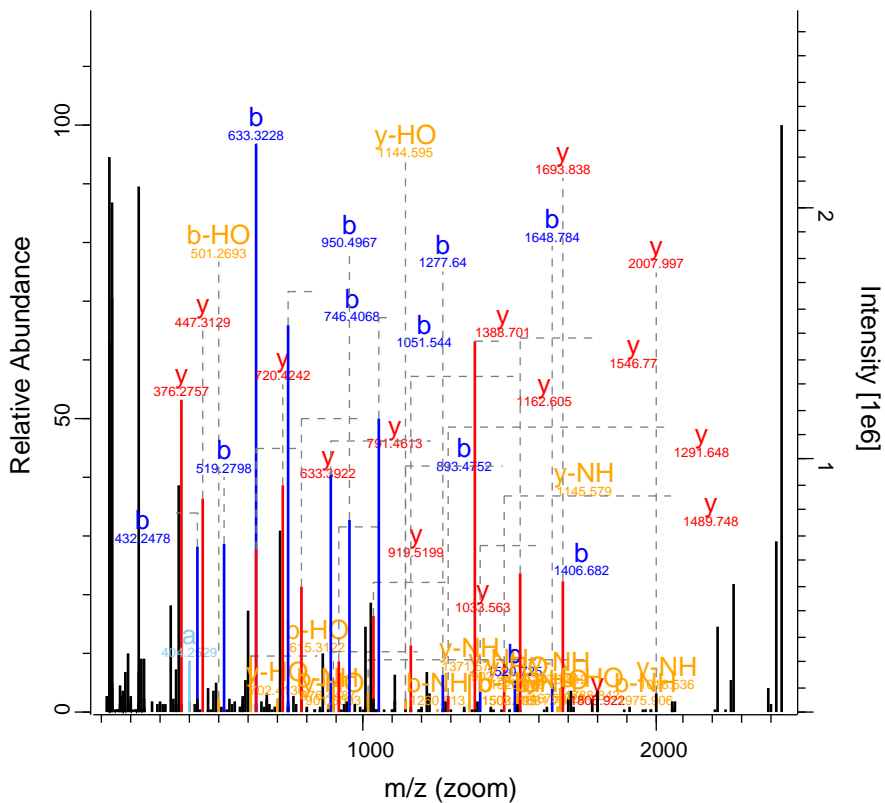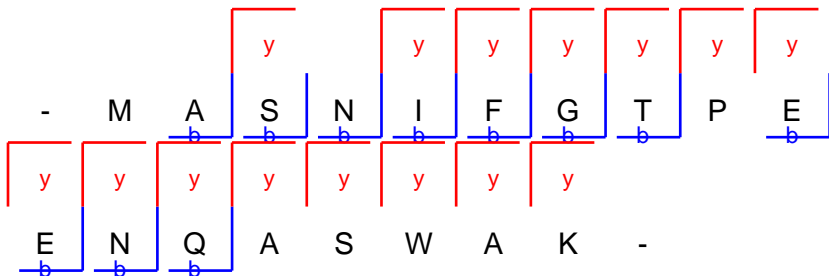

Raw File

Scan Method Score m/z

RO-QC-160121\_ZackD\_SS\_Set\_01\_Fraction\_10

34050 FTMS; HCD 53.55 521.99

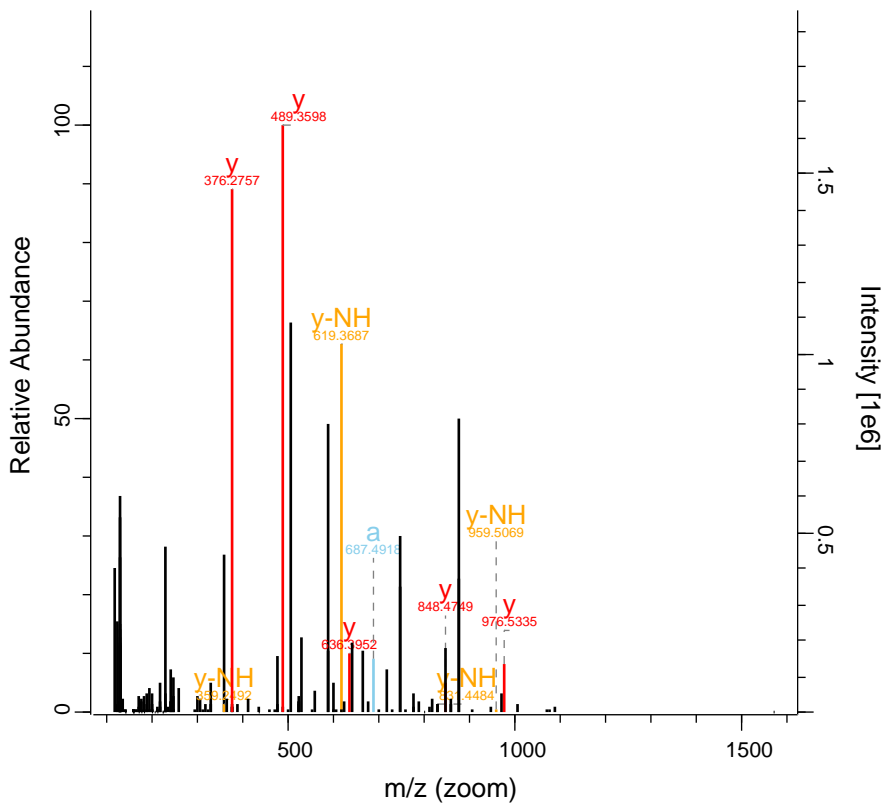

m/z (zoom)

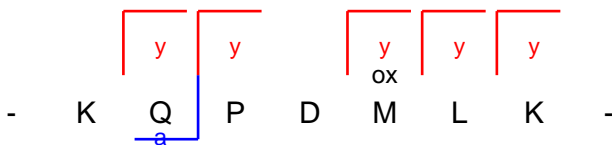

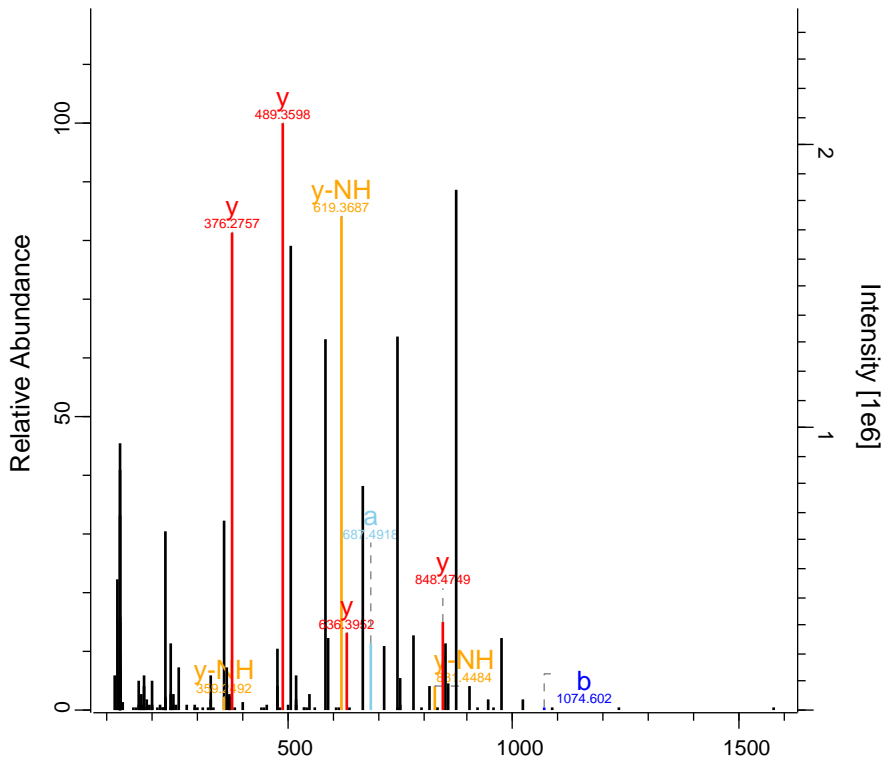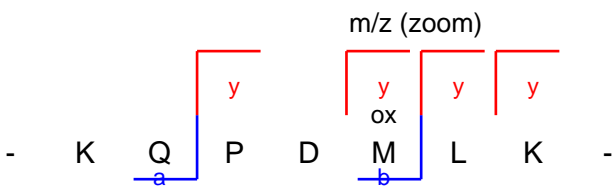

RO-QC-160121\_ZackD\_SS\_Set\_01\_Fraction 35303 FTMS; HC 77.74 574.31 KCTD7

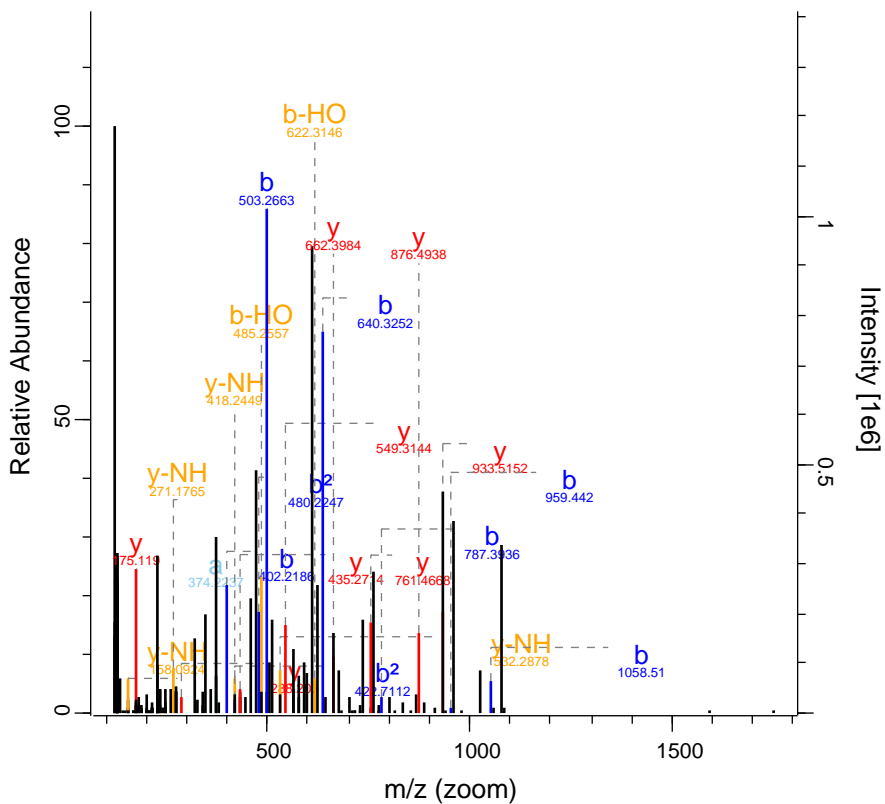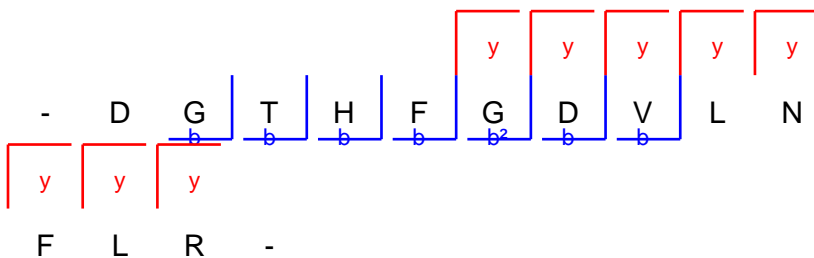

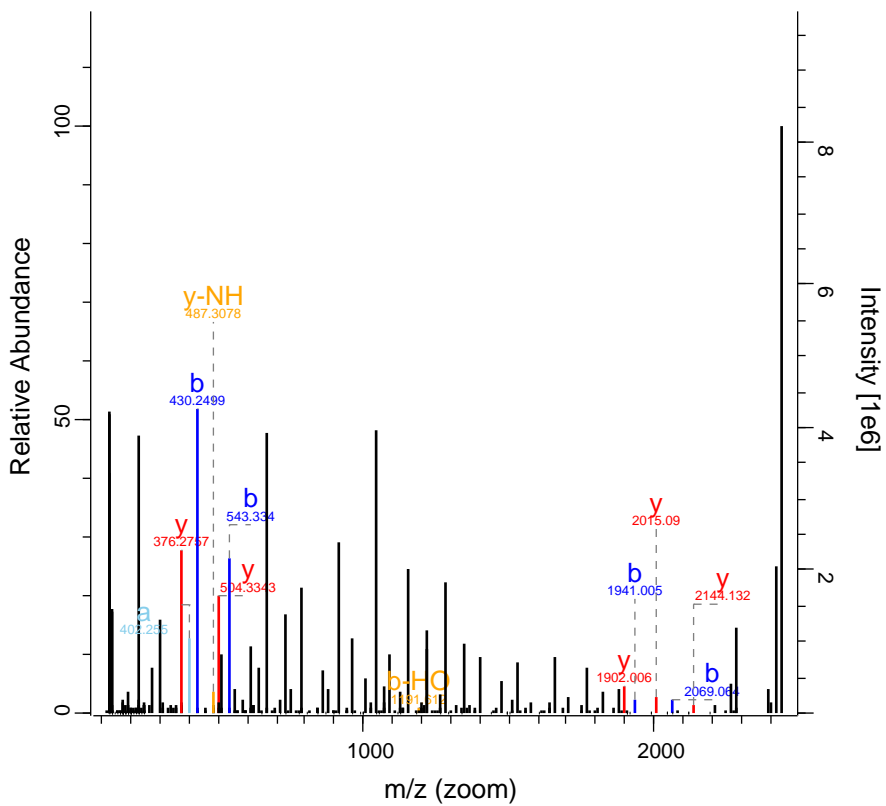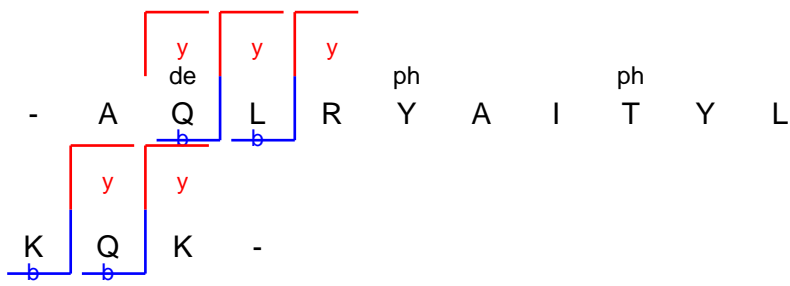

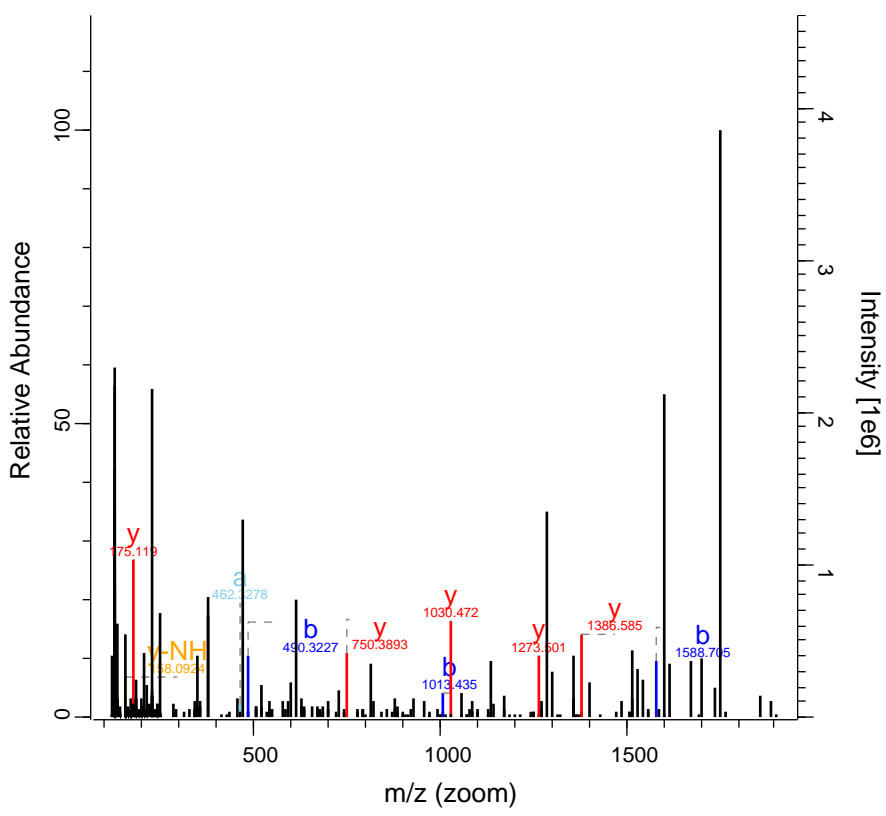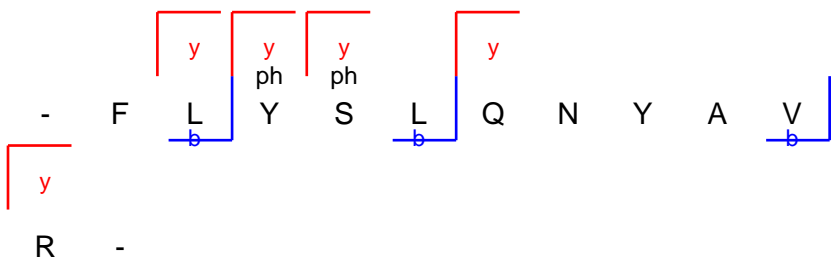

RO-QC-160121\_ZackD\_SS\_Set\_01\_Fraction 37168 FTMS; HC 173.27 955.47 RAB1F

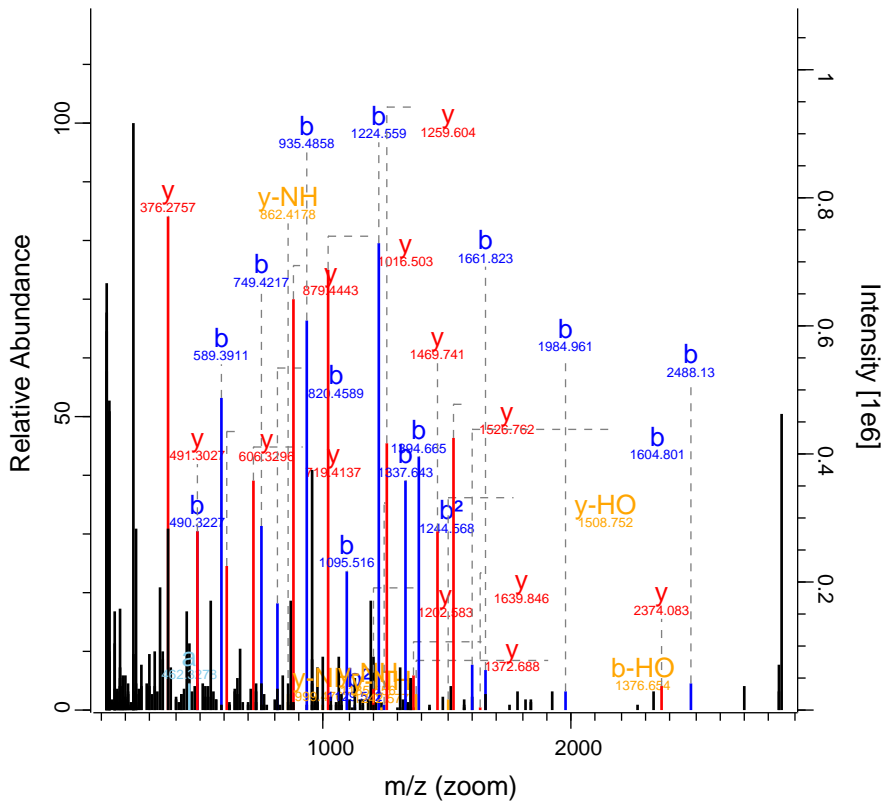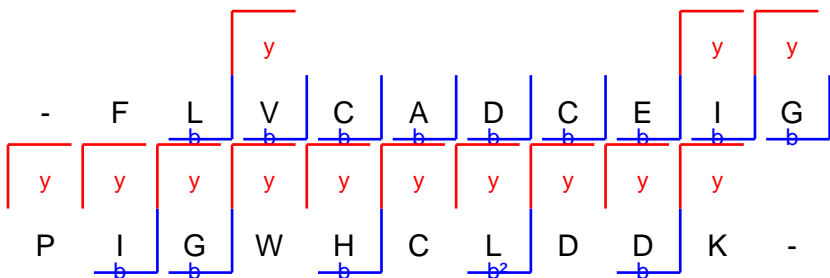





RO-QC-160121\_ZackD\_SS\_Set\_01\_Fraction 38959 FTMS; HC 79.97 618.02 OR4E1

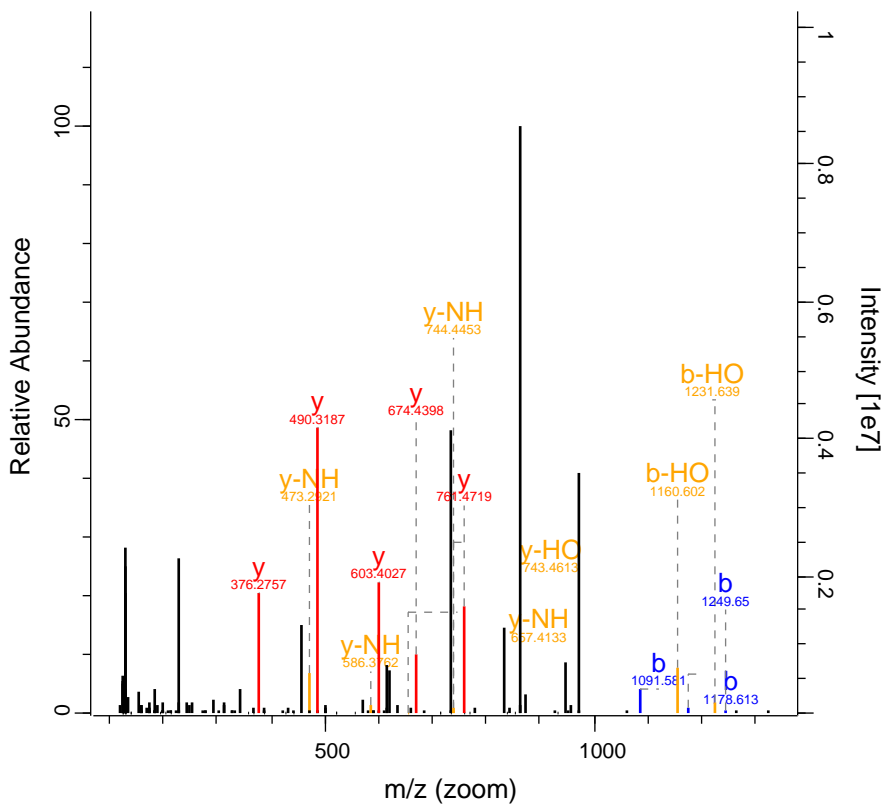

m/z (zoom)

de

- N E E M K S A L N K

-

RO-QC-160121\_ZackD\_SS\_Set\_01\_Fraction 38986 FTMS; HC 120.24 808.43 DXO

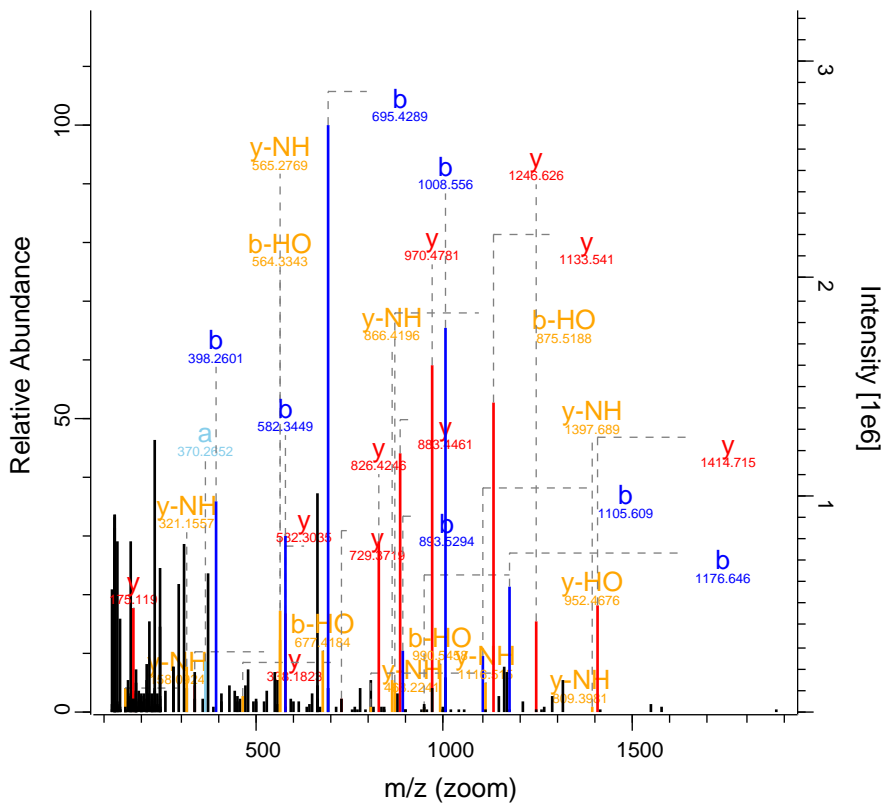

RO-QC-160121\_ZackD\_SS\_Set\_01\_Fraction 39489 FTMS; HC 113.37 1091.1 FAM221A

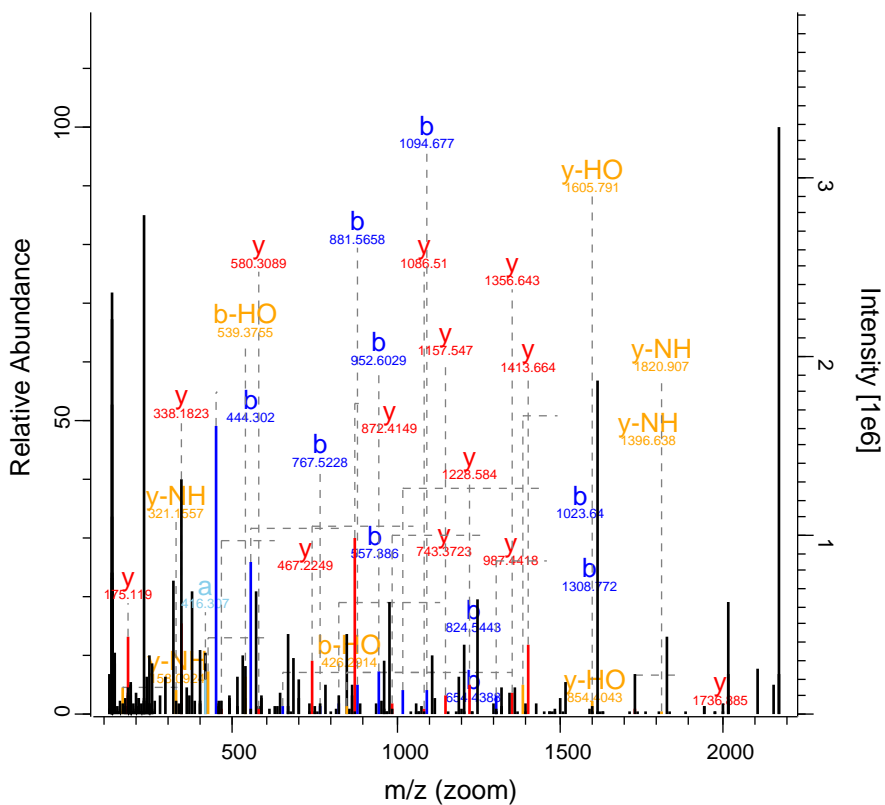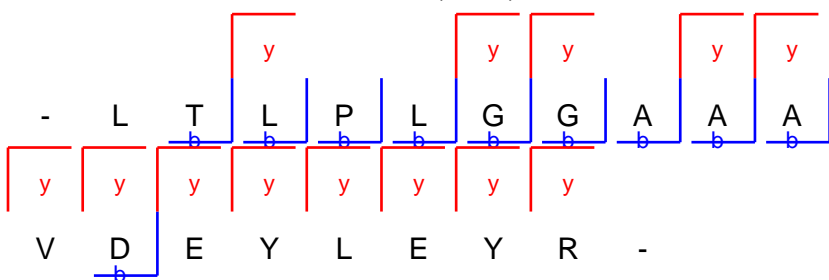



RO-QC-160121\_ZackD\_SS\_Set\_01\_Fraction 40182 FTMS; HC 94.69 1017.52 FLEM1

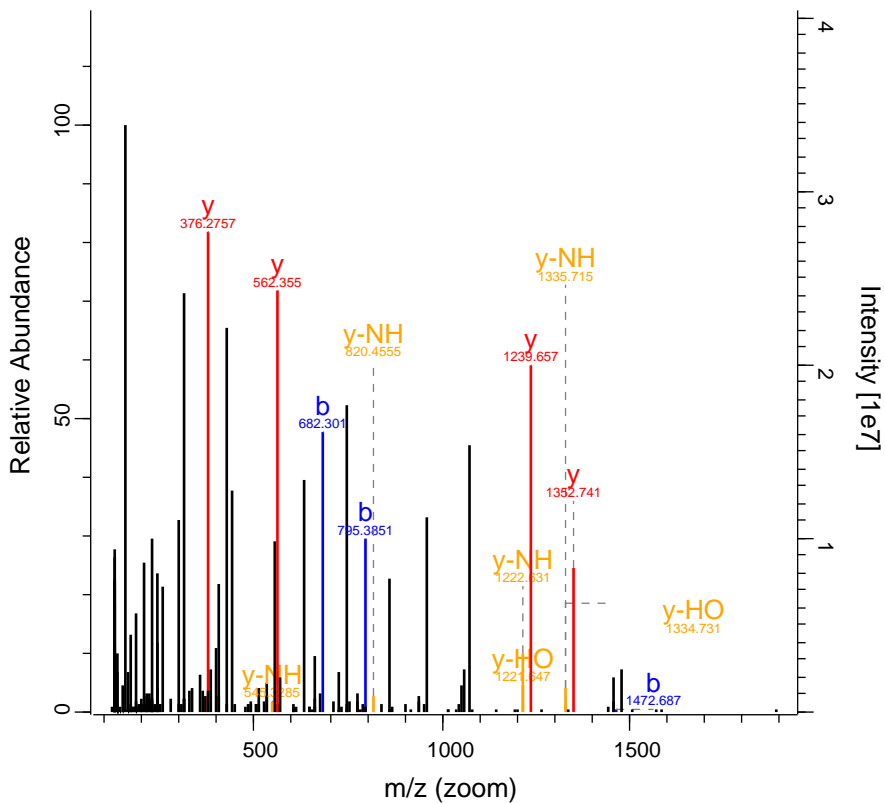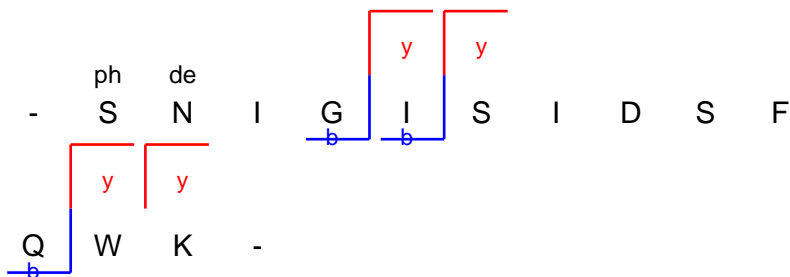

RO-QC-160121\_ZackD\_SS\_Set\_01\_Fraction 40908 FTMS; HC 61.38 1440.68 TCF7L1

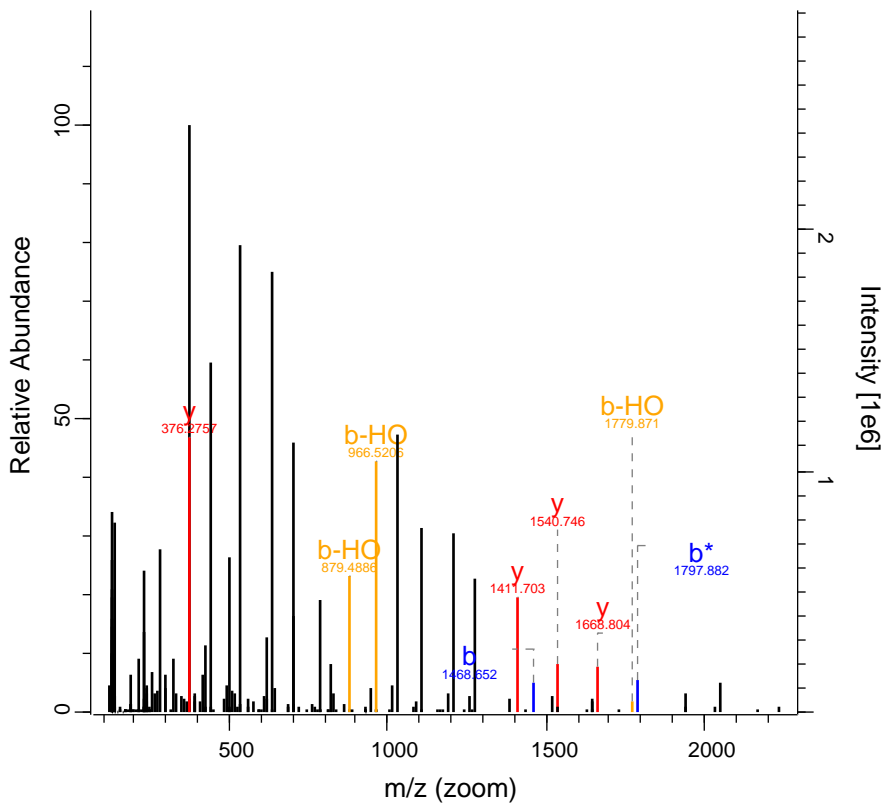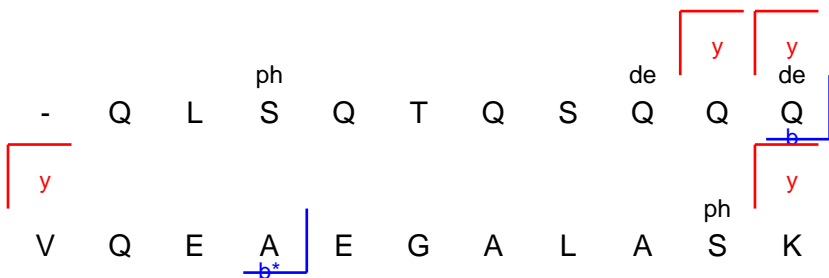

RO-QC-160121\_ZackD\_SS\_Set\_01\_Fraction 41031 FTMS; HC 90.46 835.11 BSCL2

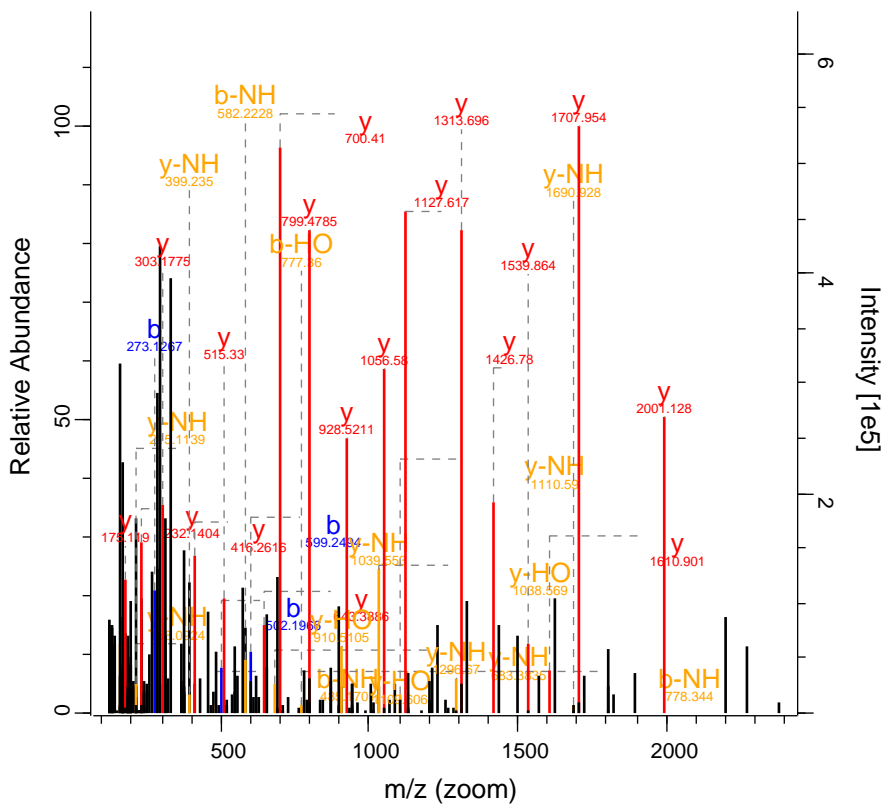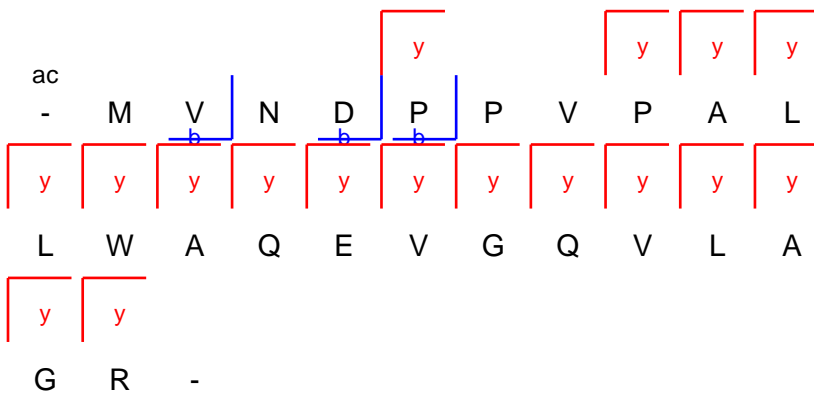



RO-QC-160121\_ZackD\_SS\_Set\_01\_Fraction 41035 FTMS; HC 96.67 1252.17 BSCL2

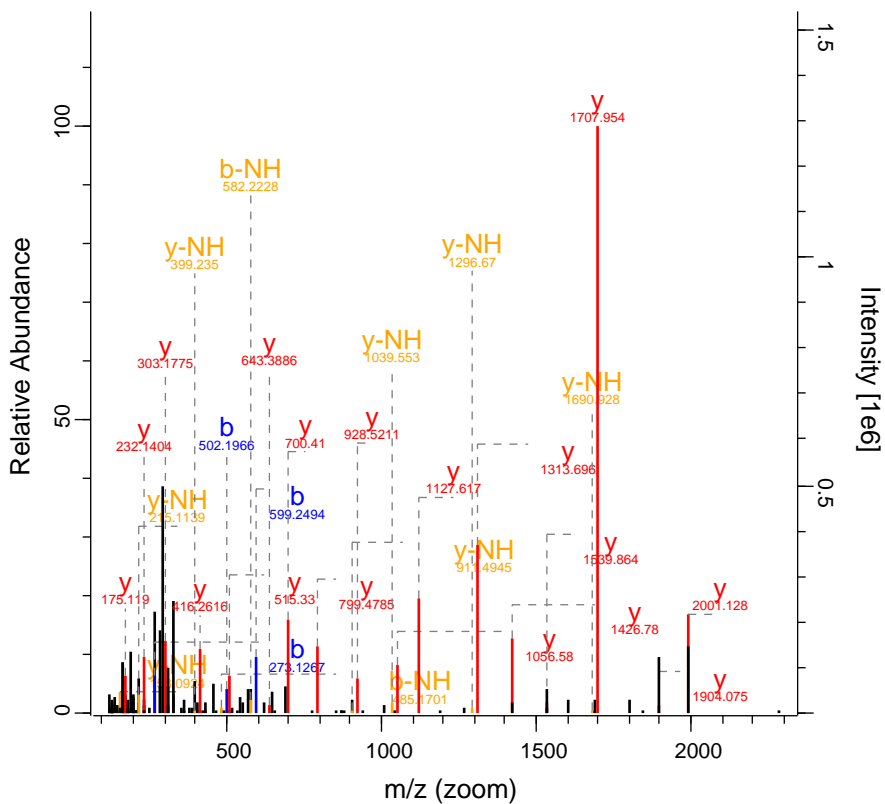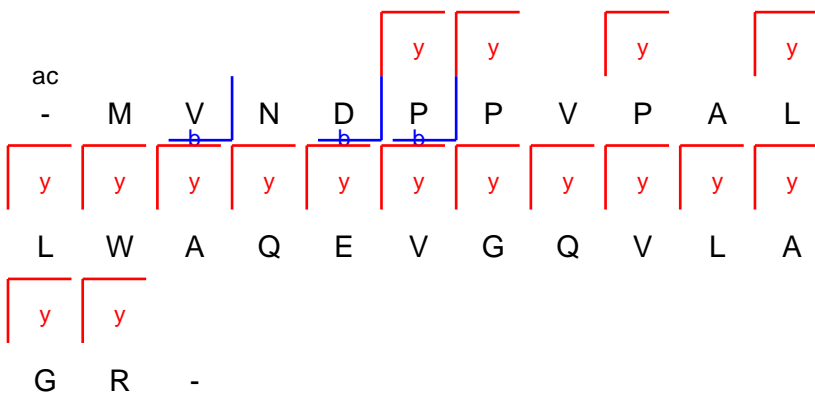

RO-QC-160121\_ZackD\_SS\_Set\_01\_Fraction 41110 FTMS; HC 92.06 780.47 LACC1

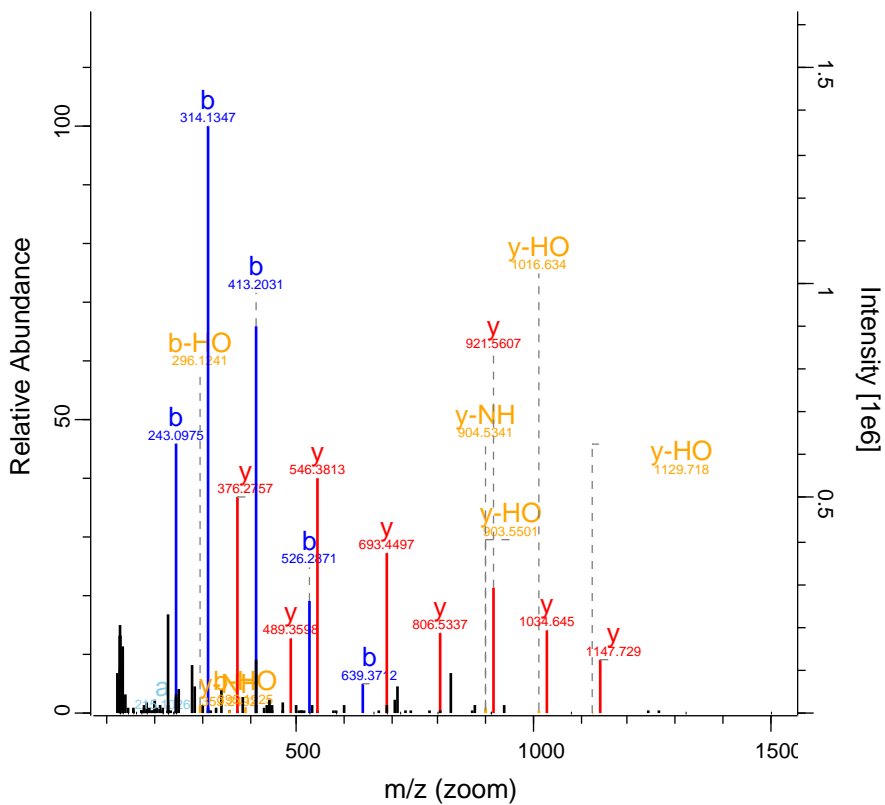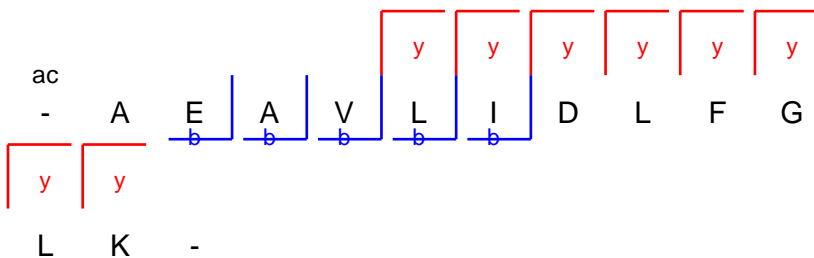

RO-QC-160121\_ZackD\_SS\_Set\_01\_Fraction 4156 FTMS; HC 42.91 619.29 ZBTB1

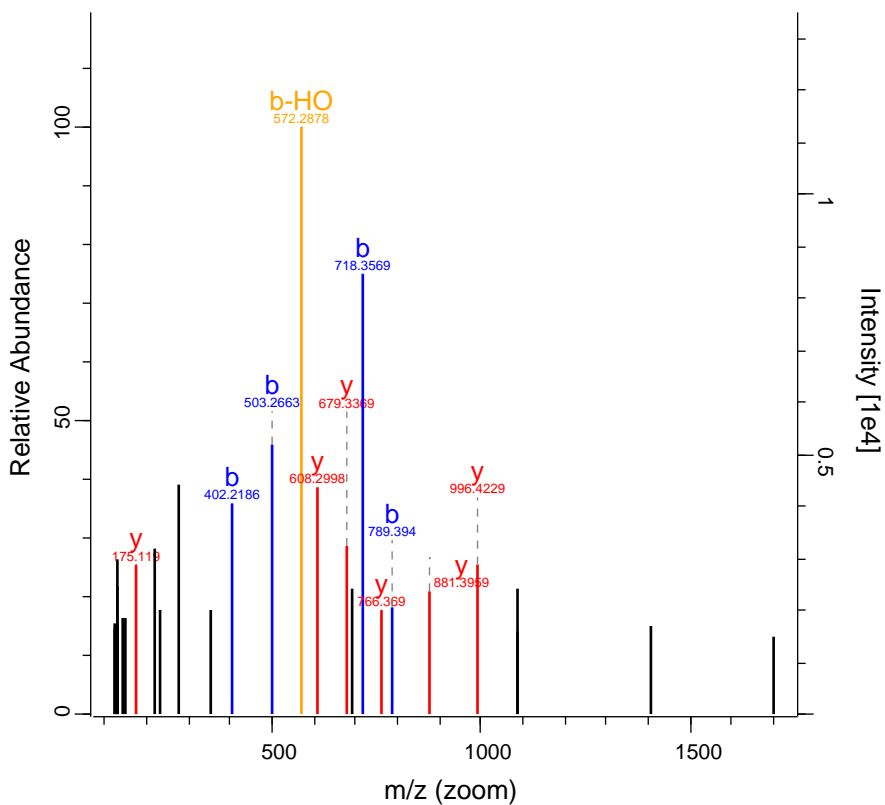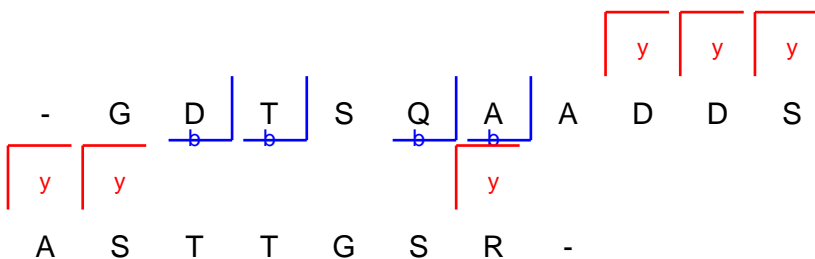

RO-QC-160121\_ZackD\_SS\_Set\_01\_Fraction 4891 FTMS; HC 43.38 552.31 PADI4

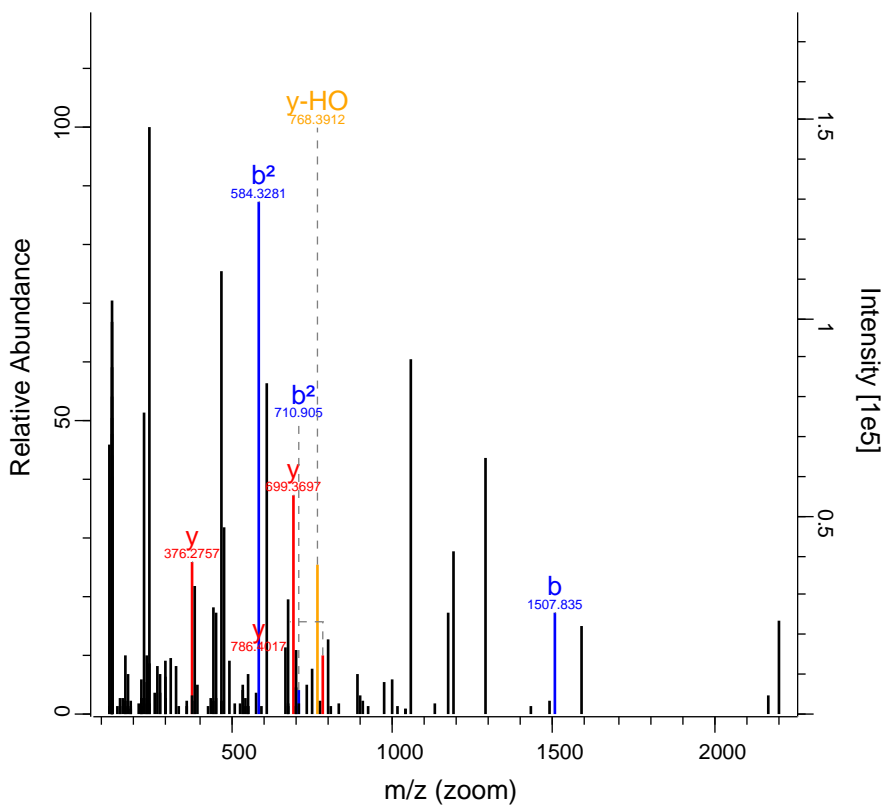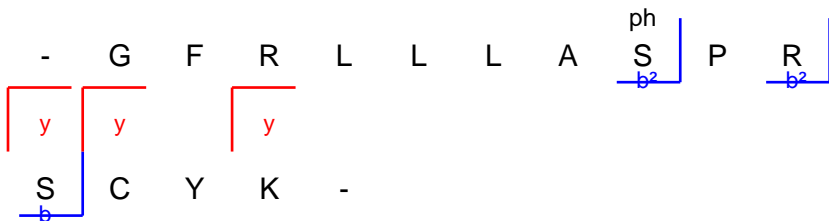

RO-QC-160121\_ZackD\_SS\_Set\_01\_Fraction 4988 FTMS; HC 117.98 674.05 MOSPD1

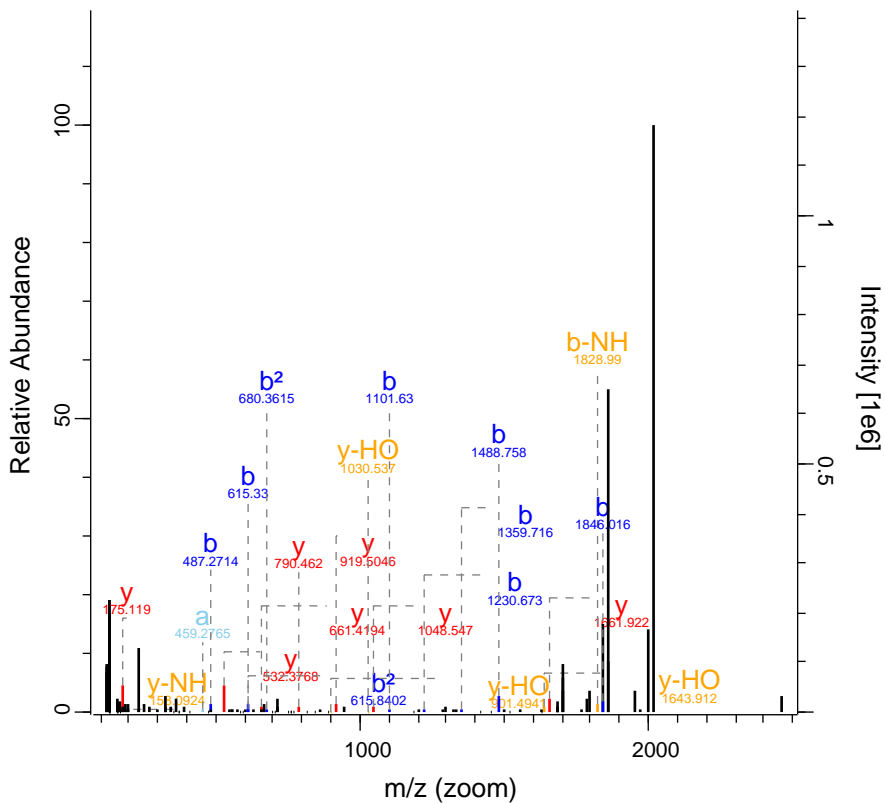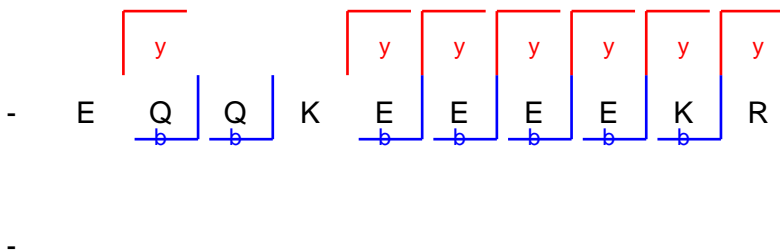

RO-QC-160121\_ZackD\_SS\_Set\_01\_Fraction 5145 FTMS; HC 70.26 610.26 EGFL7

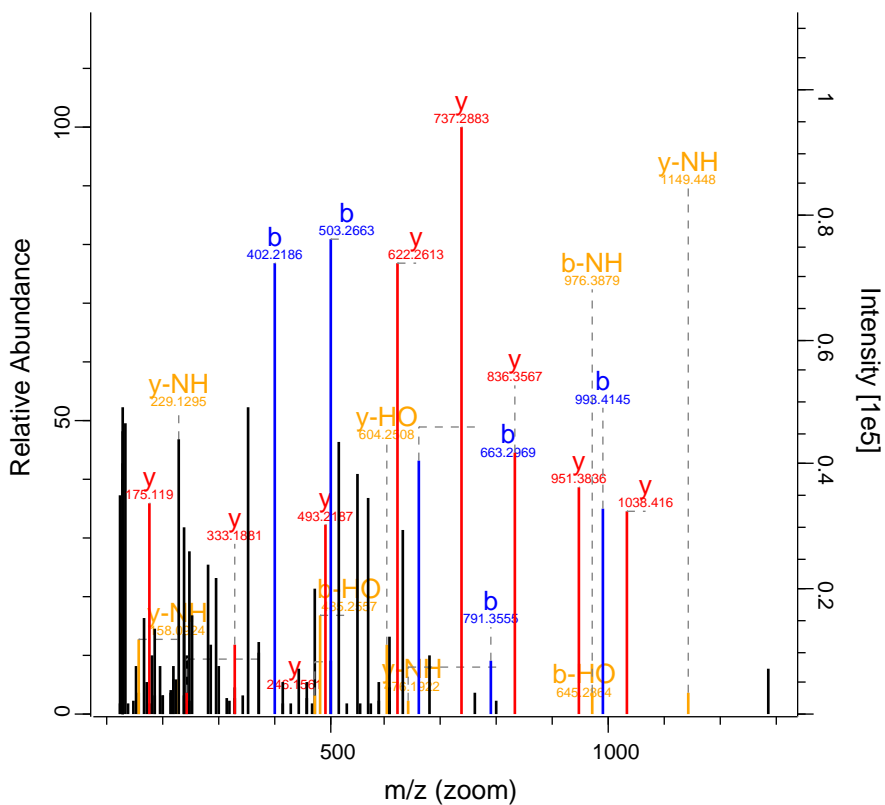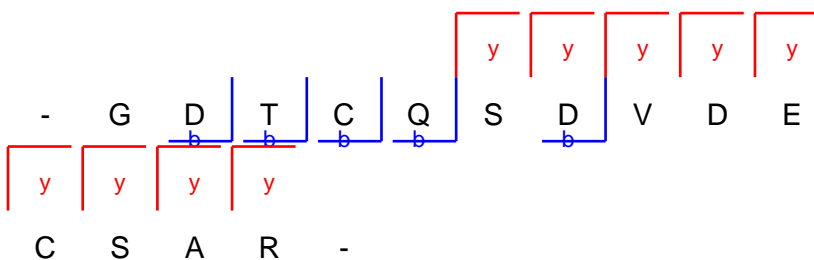

RO-QC-160121\_ZackD\_SS\_Set\_01\_Fraction 5165 FTMS; HC 89.55 914.89 EGFL7

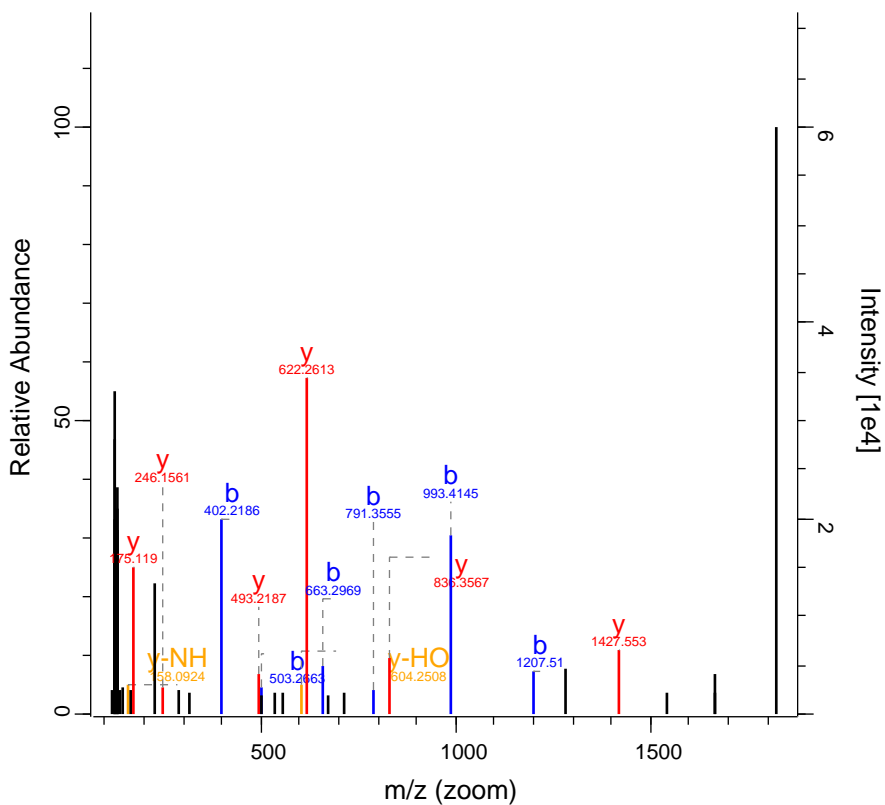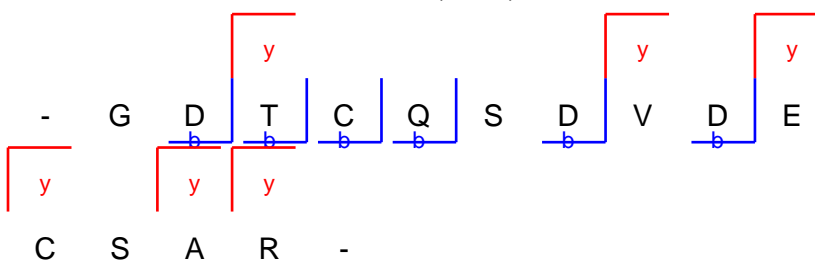

RO-QC-160121\_ZackD\_SS\_Set\_01\_Fraction 5489 FTMS; HC 81.3 396.75 EZH1

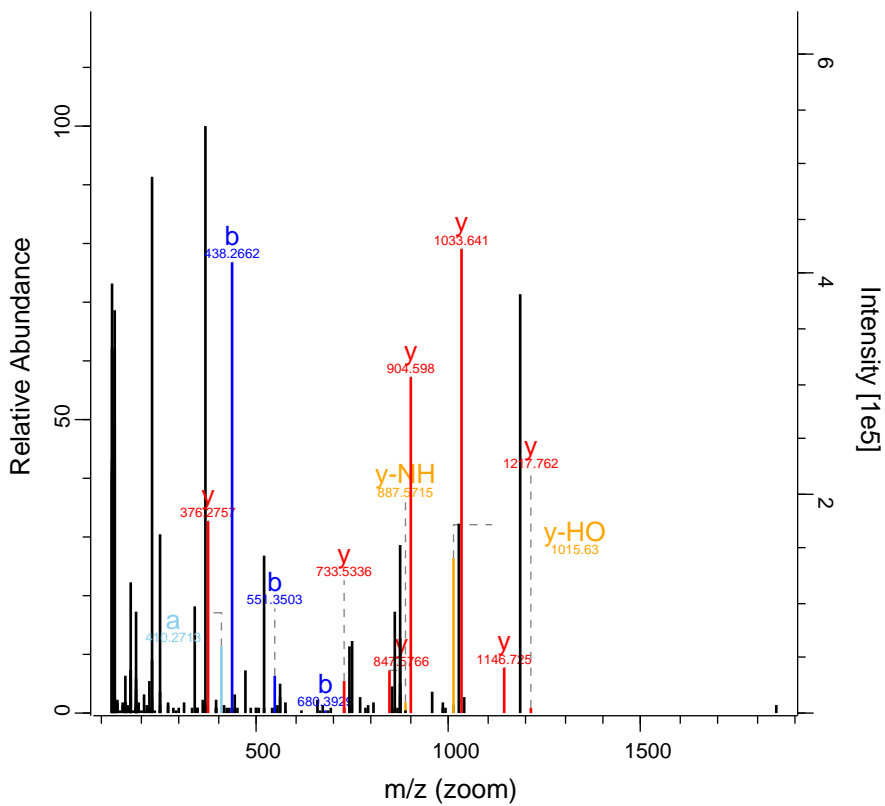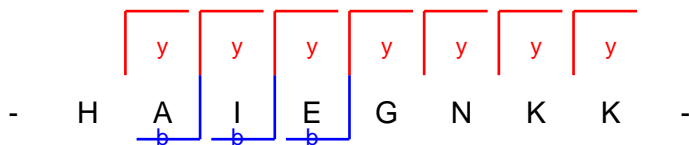



RO-QC-160121\_ZackD\_SS\_Set\_01\_Fraction 5535 FTMS; HC 55.06 840.92 TASP1

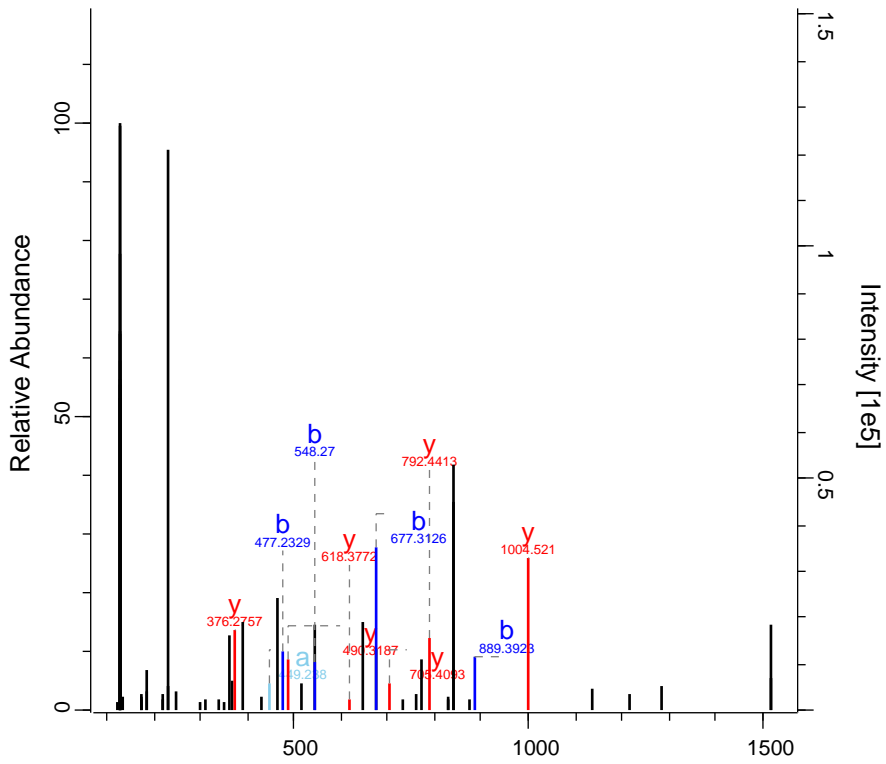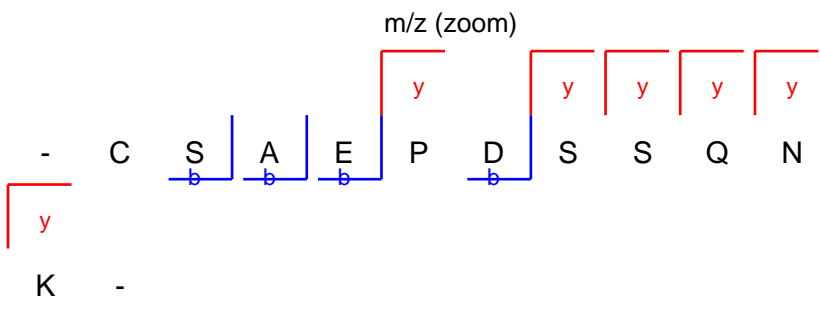

K -

RO-QC-160121\_ZackD\_SS\_Set\_01\_Fraction\_5745 FTMS; HCl 81.34 797.4 CCDC69

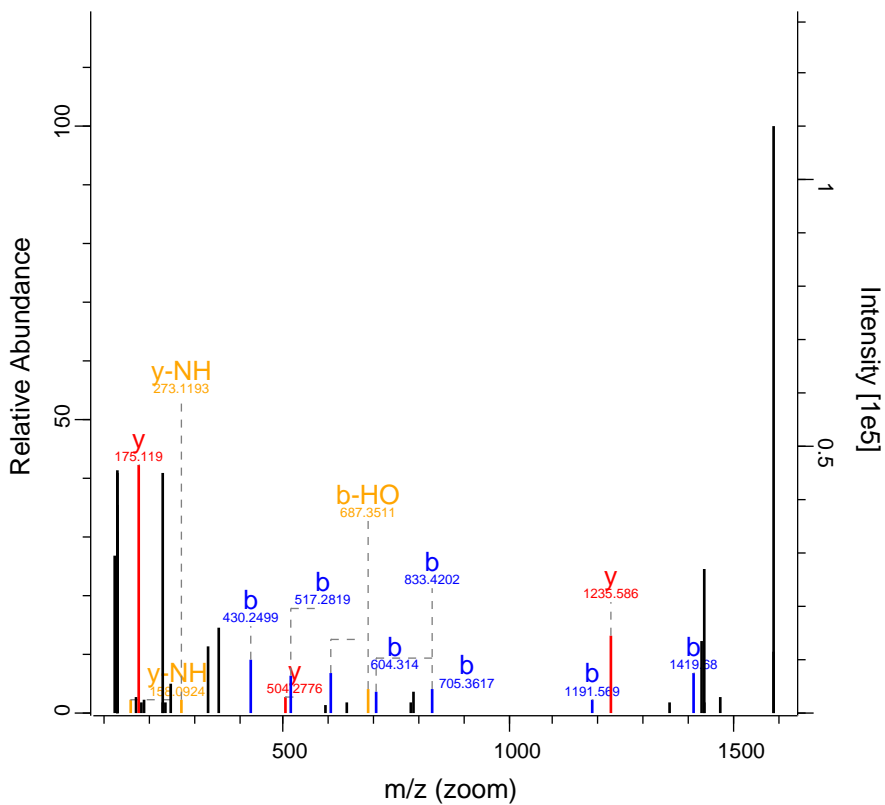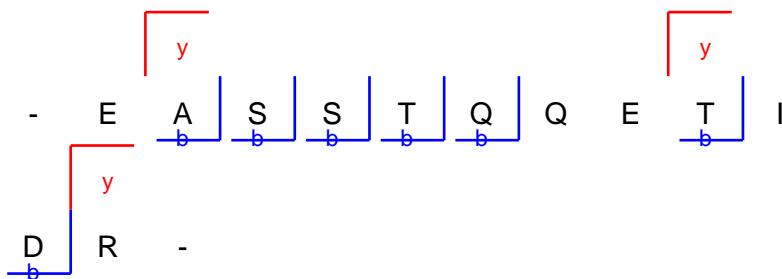

RO-QC-160121\_ZackD\_SS\_Set\_01\_Fraction 6249 FTMS; HC 208.56 780.89 GKAP1

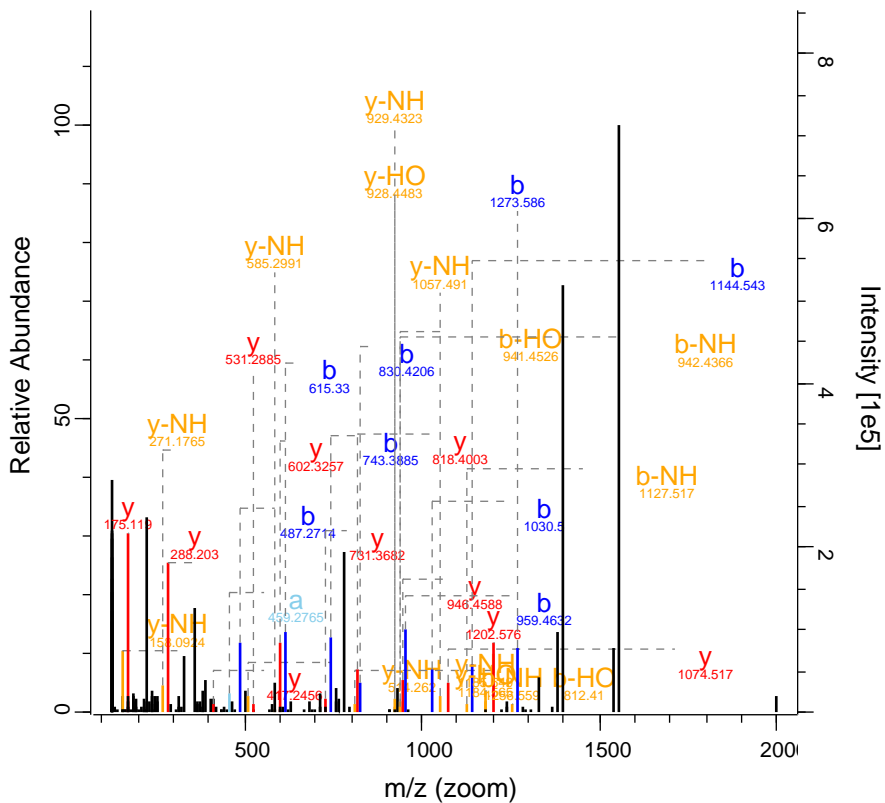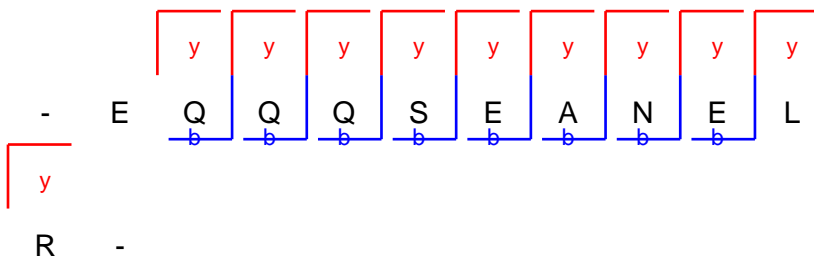

RO-QC-160121\_ZackD\_SS\_Set\_01\_Fraction 6615 FTMS; HC 70.52 694.34 MLF2

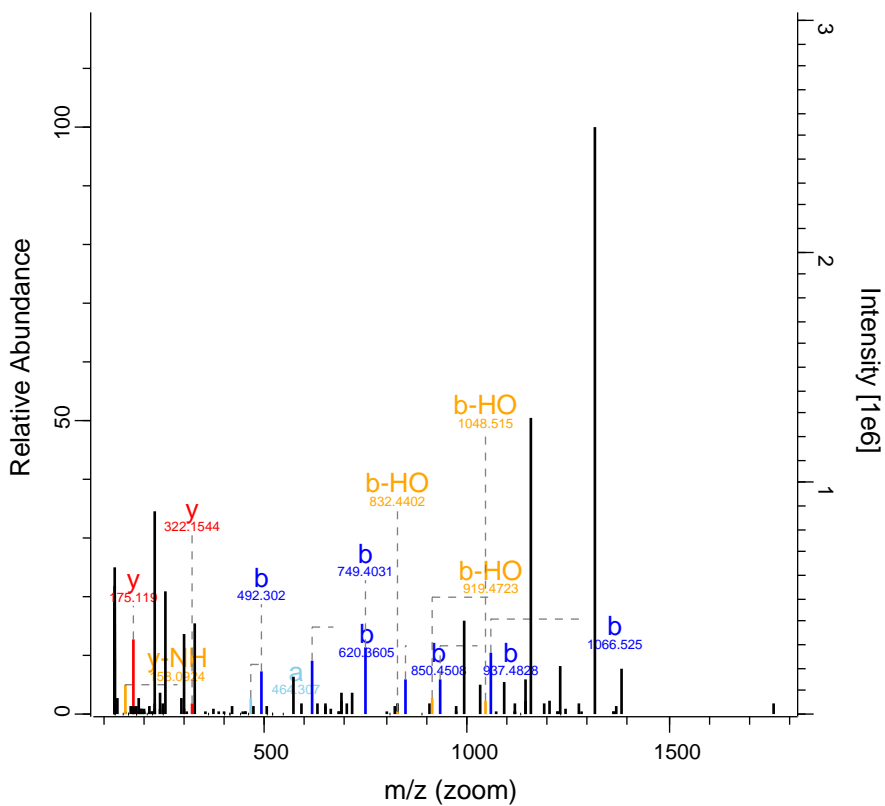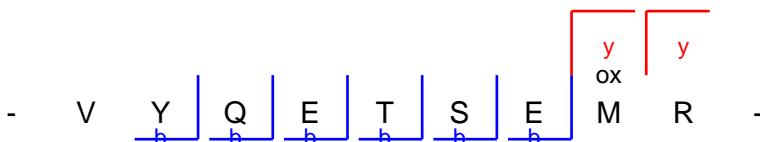



| Raw File                                 | Scan | Method    | Score | m/z   |
|------------------------------------------|------|-----------|-------|-------|
| RO-QC-160121_ZackD_SS_Set_01_Fraction_11 | 8021 | FTMS; HCD | 52.4  | 795.4 |

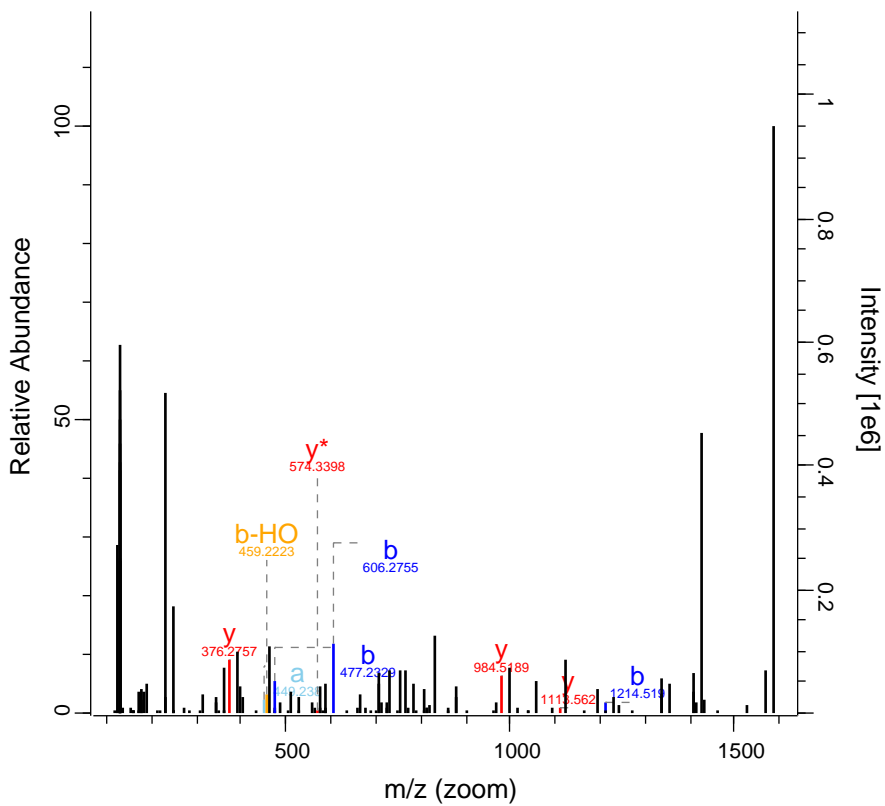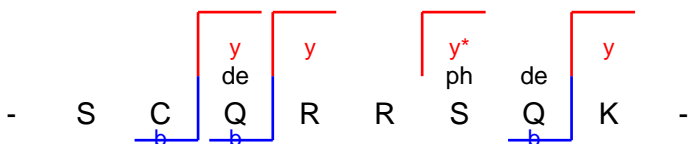

RO-QC-160121\_ZackD\_SS\_Set\_01\_Fraction 8386 FTMS; HC 45.14 751.89 LRRRC74A

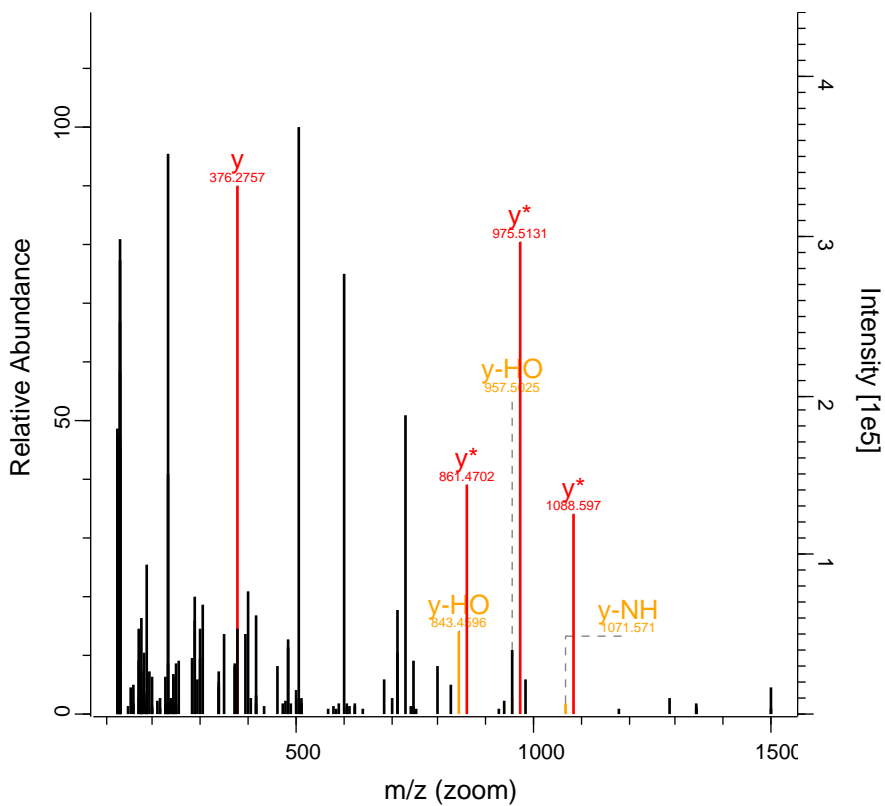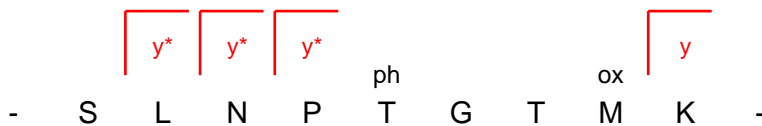





RO-QC-160121\_ZackD\_SS\_Set\_01\_Fraction 9072 FTMS; HC 112.02 554.59 LEPROT

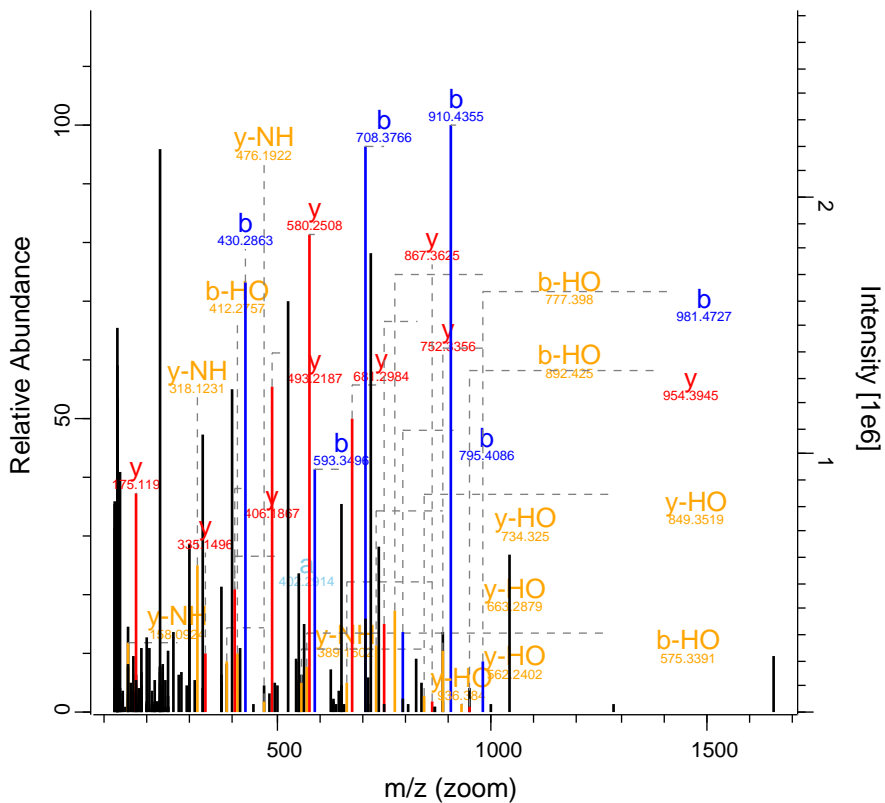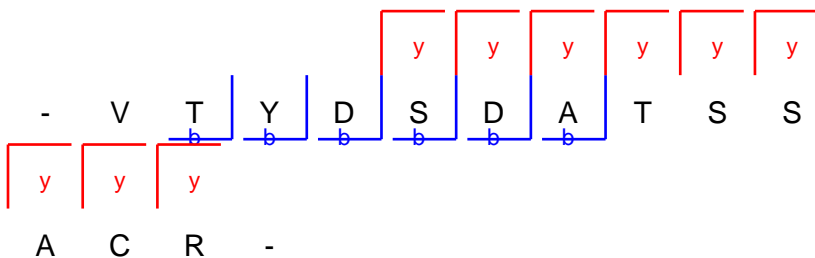

A C R -

RO-QC-160121\_ZackD\_SS\_Set\_01\_Fraction 9767 FTMS; HC 104.45 366.22 C2orf15

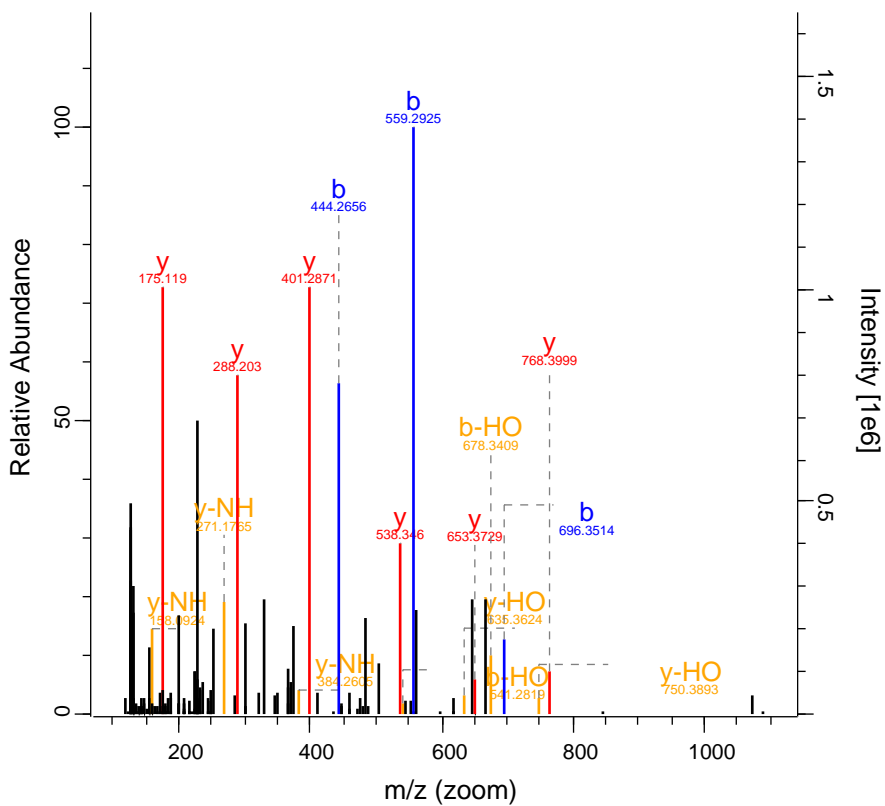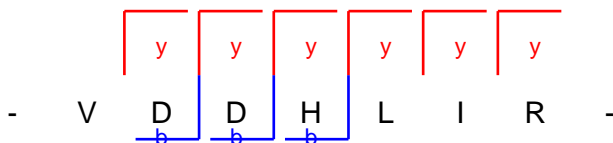

RO-QC-160121\_ZackD\_SS\_Set\_01\_Fraction10203 FTMS; HC 38.78 400.49 USH1C

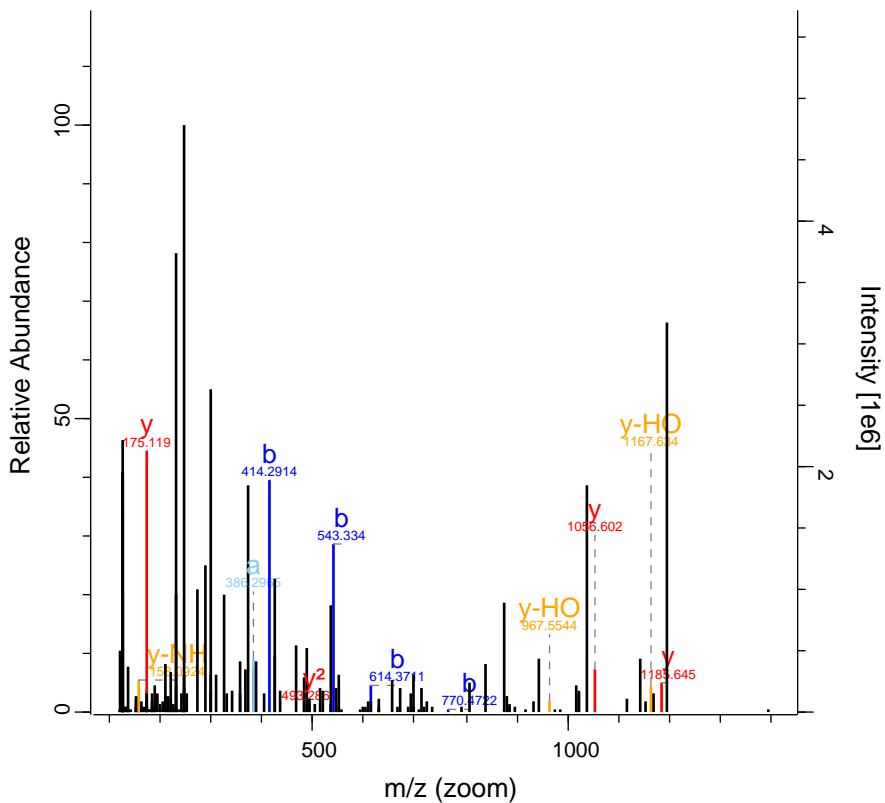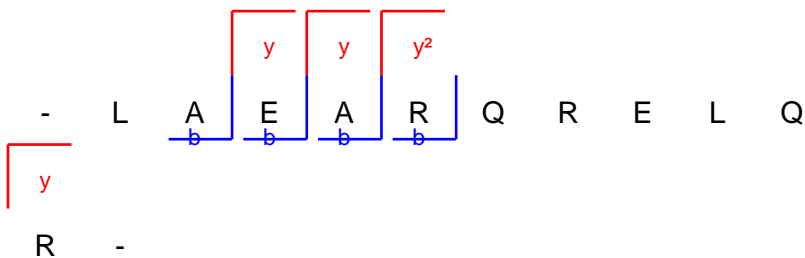

RO-QC-160121\_ZackD\_SS\_Set\_01\_Fraction 10901 FTMS; HC 141.89 832.9 YIPF5

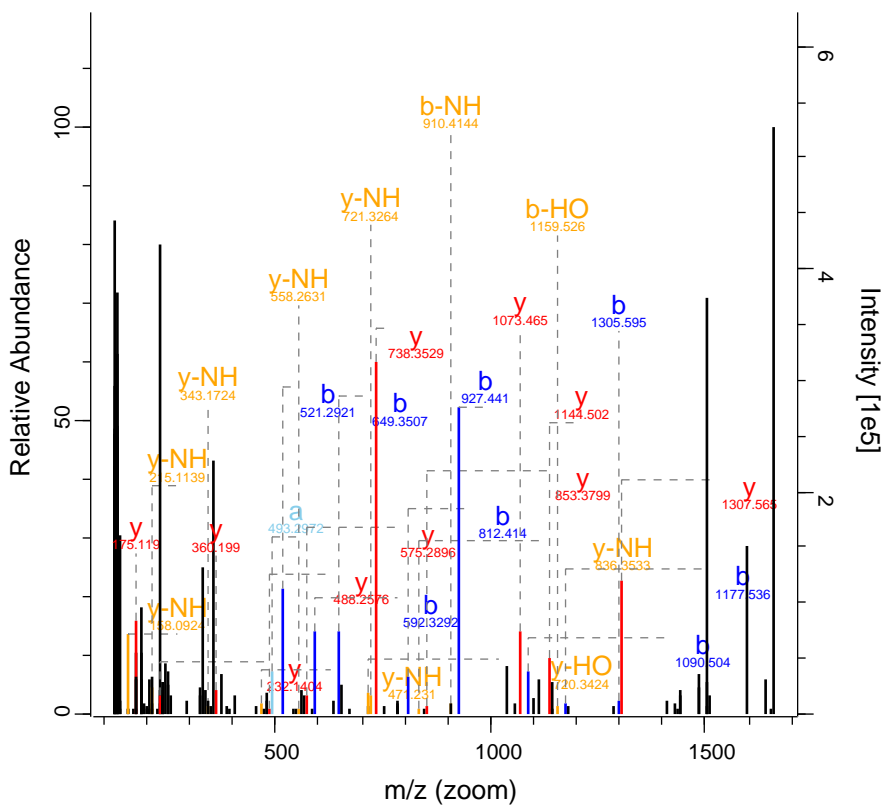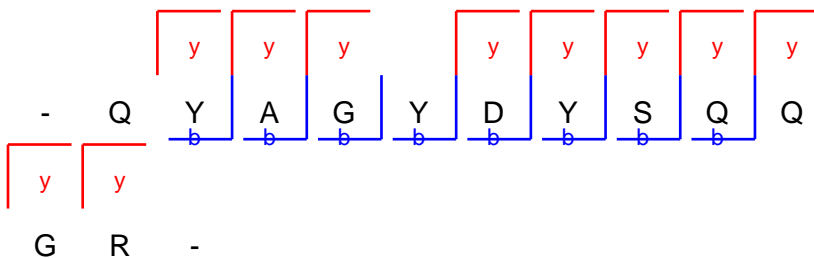

RO-QC-160121\_ZackD\_SS\_Set\_01\_Fraction 10995 FTMS; HC 107.09 555.6 YIPF5

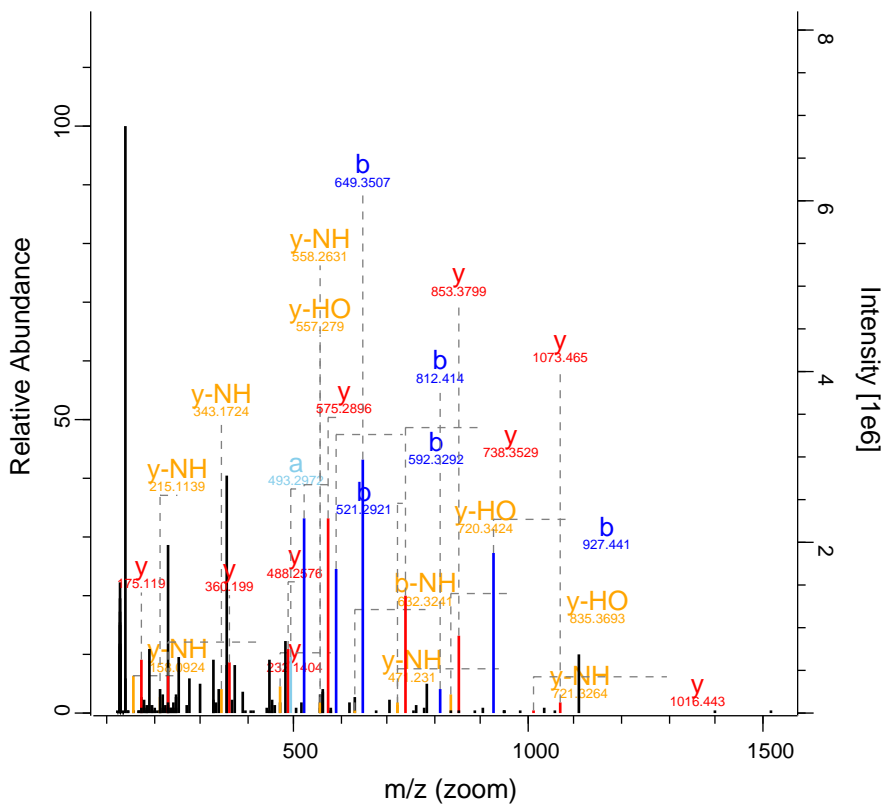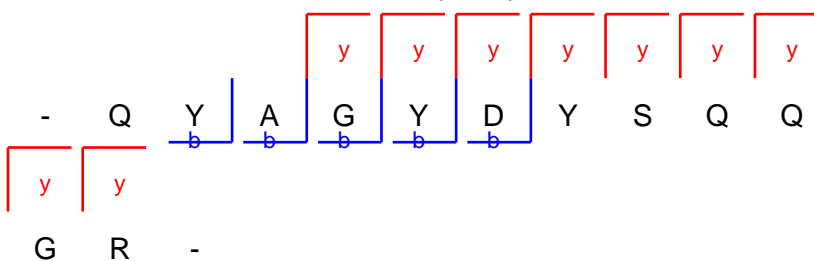

G R -

RO-QC-160121\_ZackD\_SS\_Set\_01\_Fraction1 11015 FTMS; HC 42.21 476.47 C6orf165

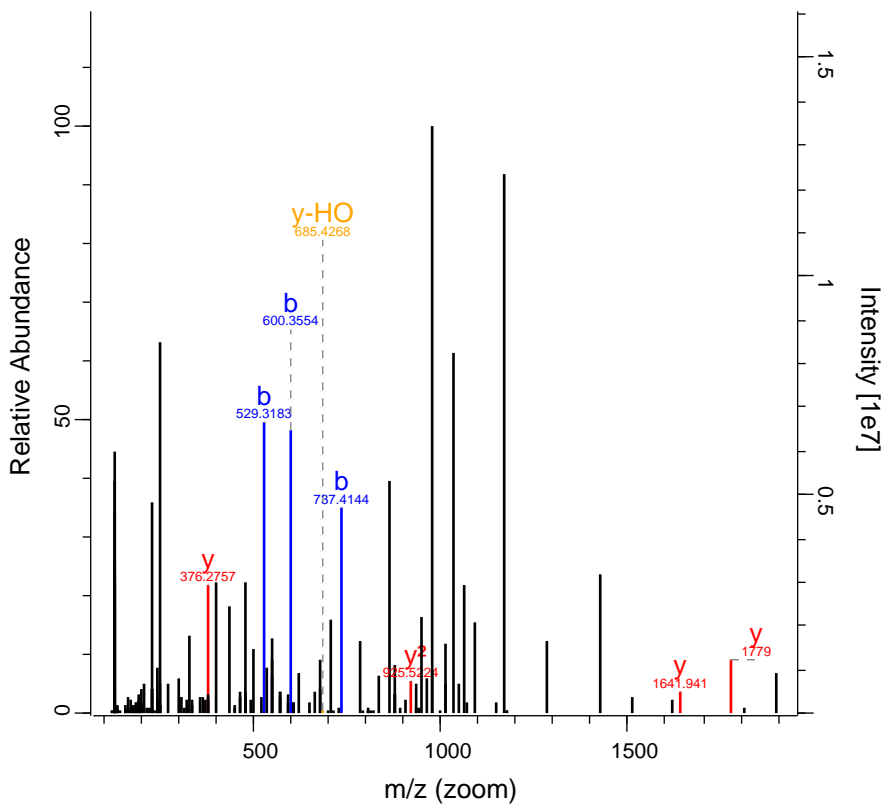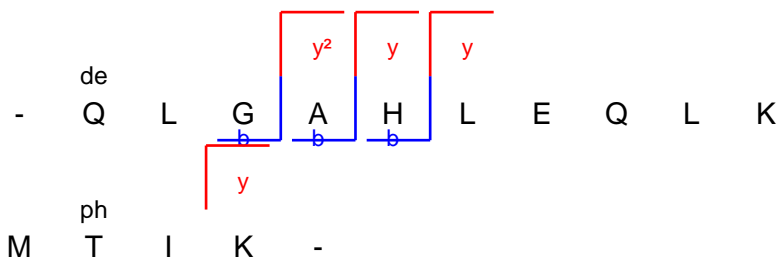

RO-QC-160121\_ZackD\_SS\_Set\_01\_Fraction1 11367 FTMS; HC 135.86 686.34 MLF2

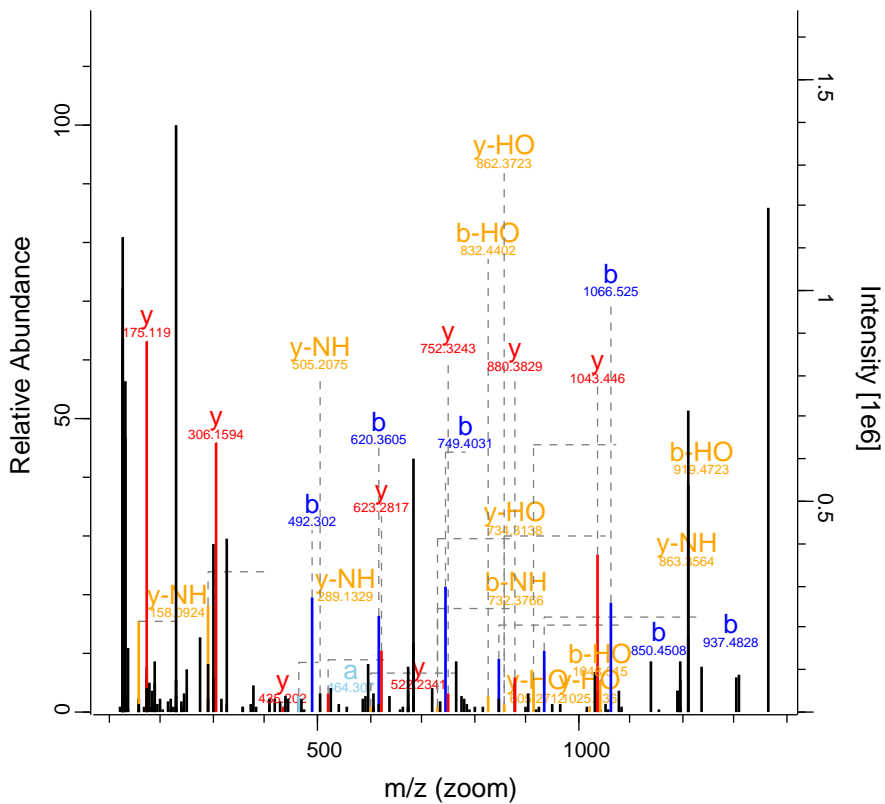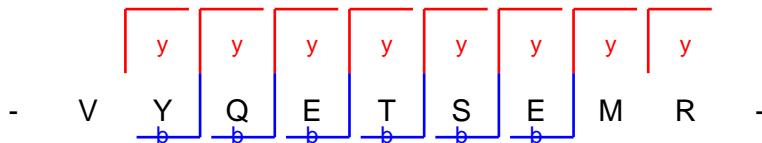

Raw File

Scan Method Score m/z

RO-QC-160121\_ZackD\_SS\_Set\_01\_Fraction\_11

12880 FTMS; HCD 50.97 378.21

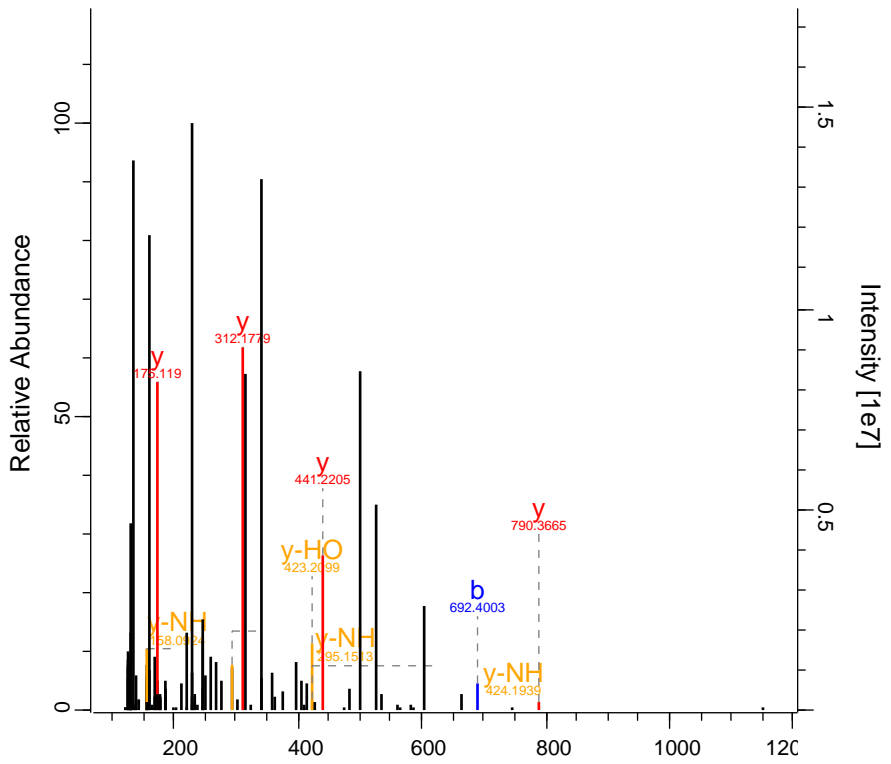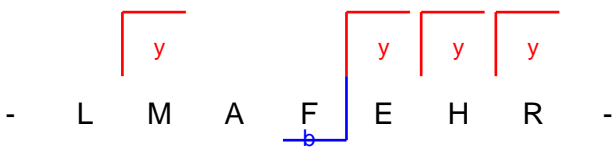



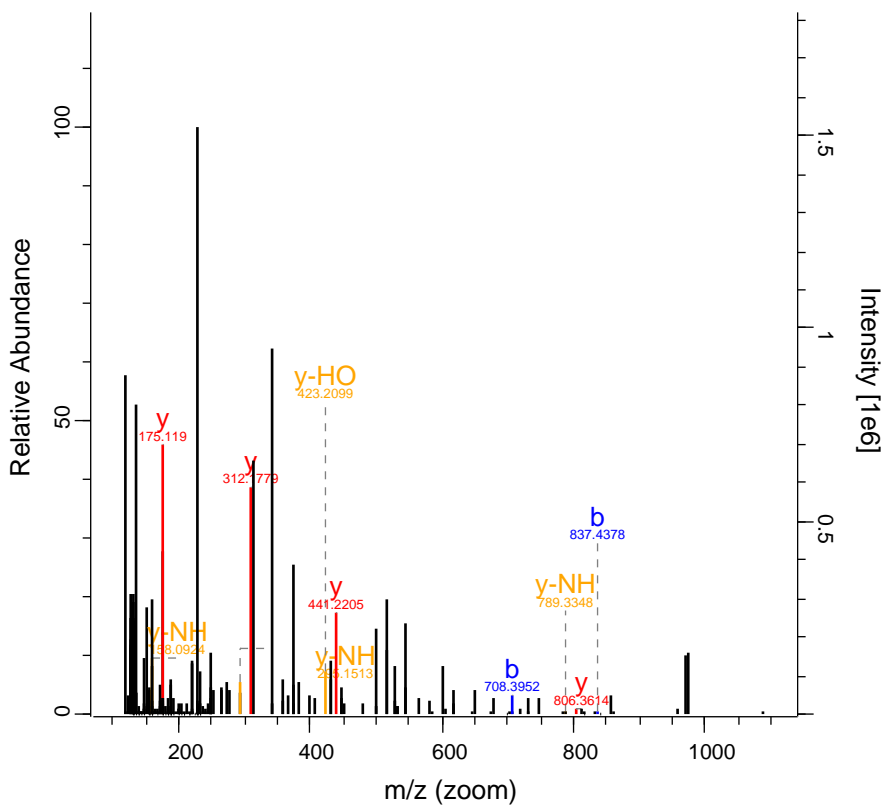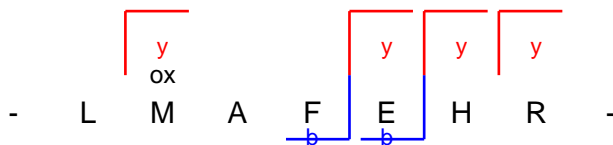

RO-QC-160121\_ZackD\_SS\_Set\_01\_Fraction 13012 FTMS; HC 82.54 725.07 ZNF350

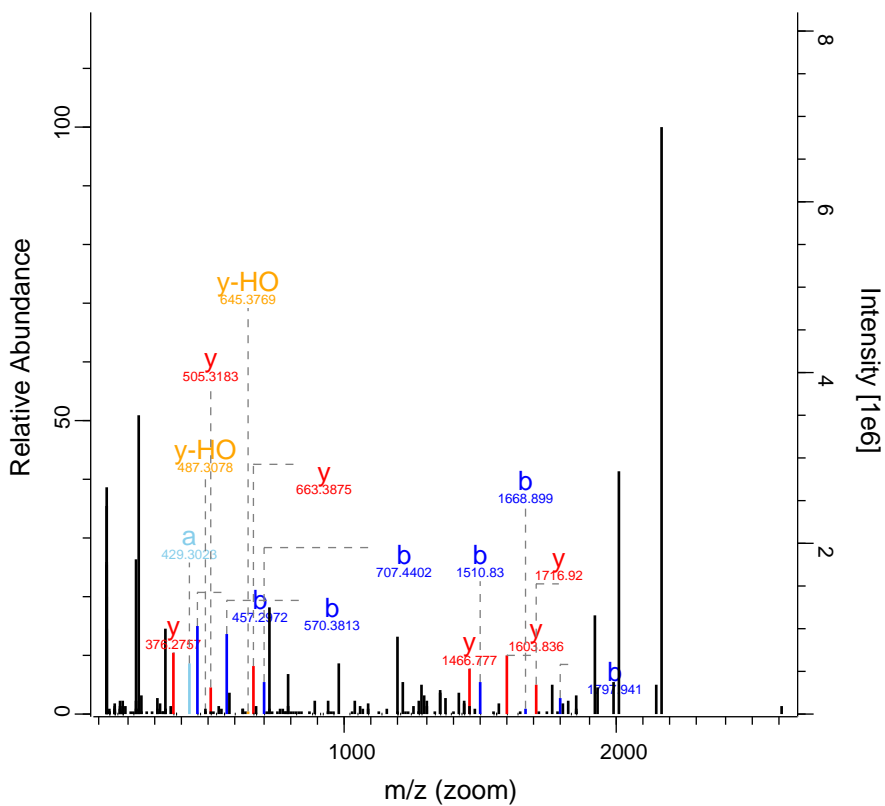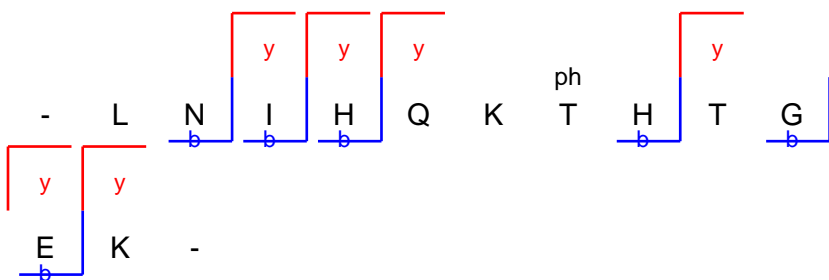

Raw File

Scan Method Score m/z

RO-QC-160121\_ZackD\_SS\_Set\_01\_Fraction\_11

13070 FTMS; HCD 60.36 566.81

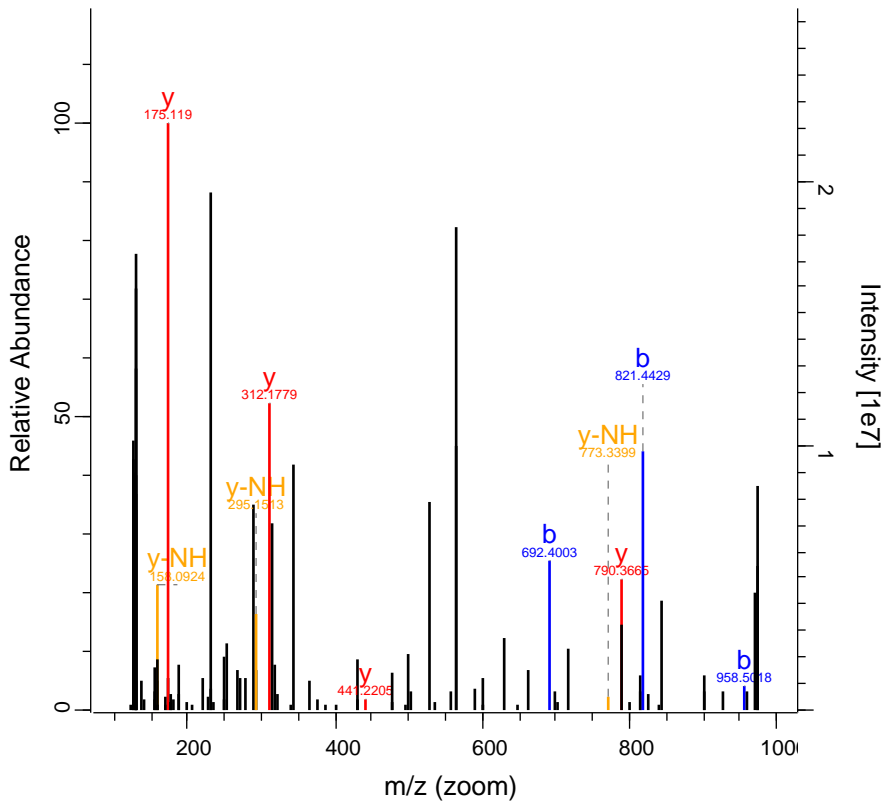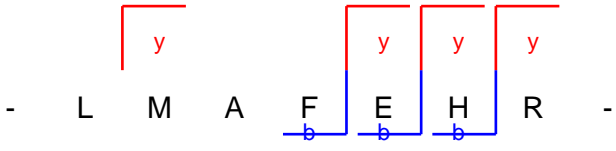

Raw File

Scan Method Score m/z

RO-QC-160121\_ZackD\_SS\_Set\_01\_Fraction\_11

13112 FTMS; HCD 38.82 378.21

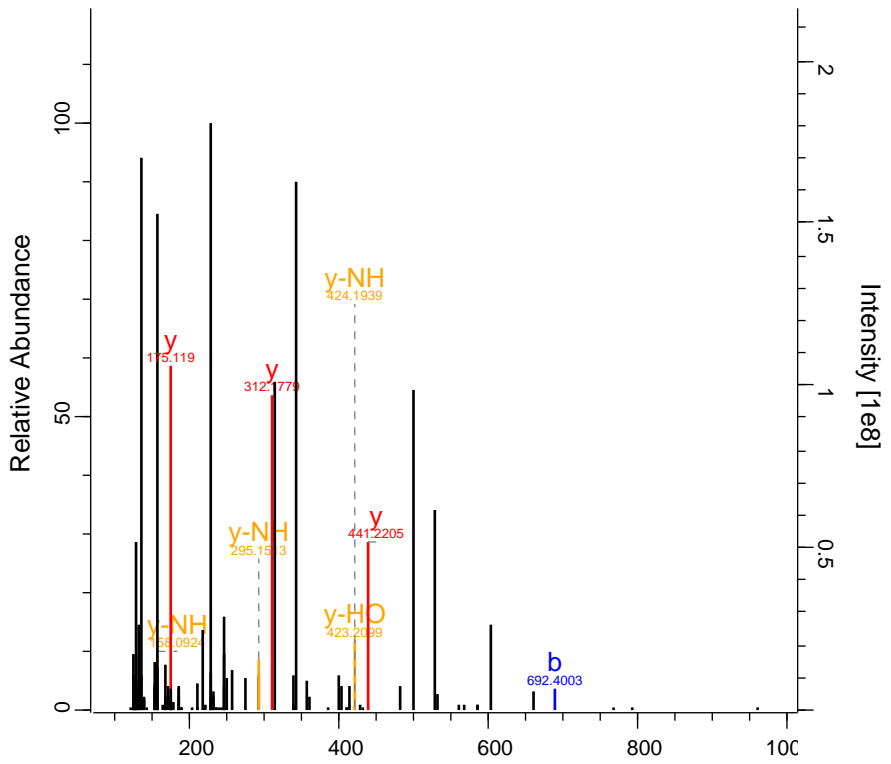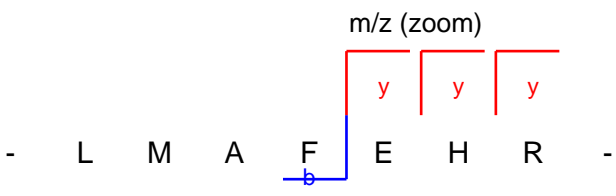

RO-QC-160121\_ZackD\_SS\_Set\_01\_Fraction13301 FTMS; HC 116.28 783.71 F2R

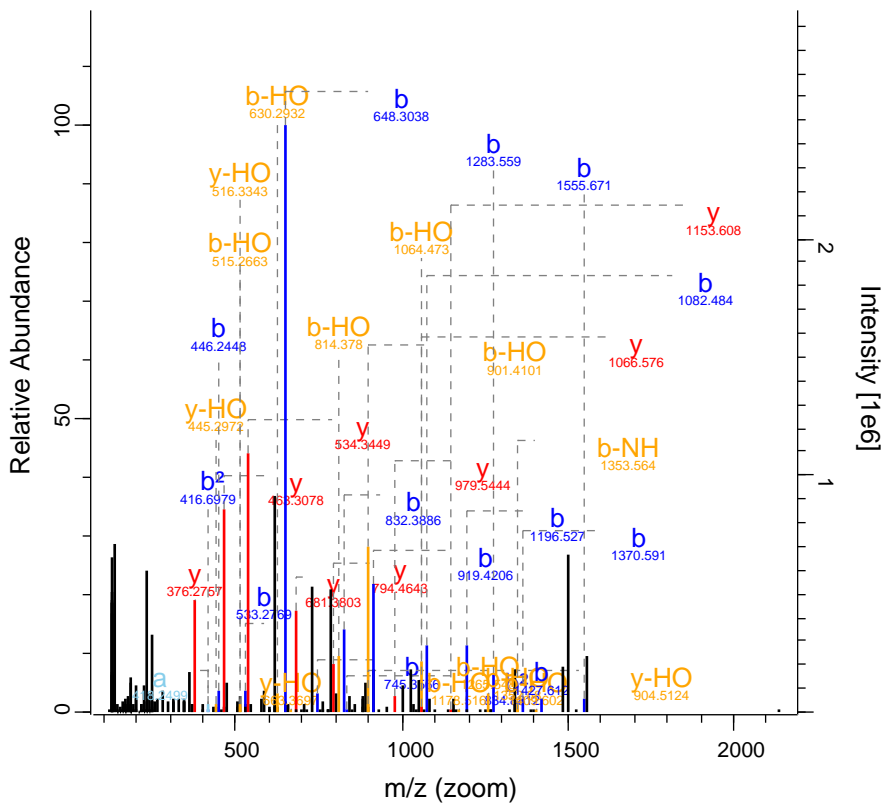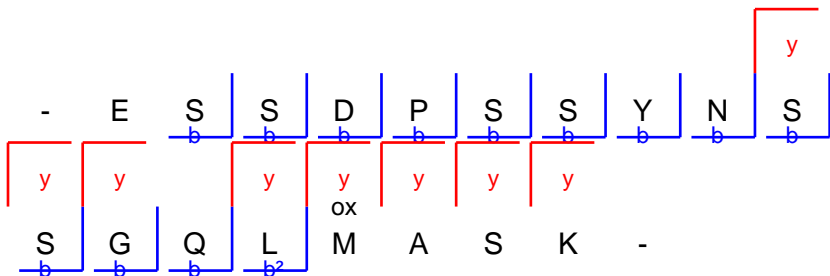

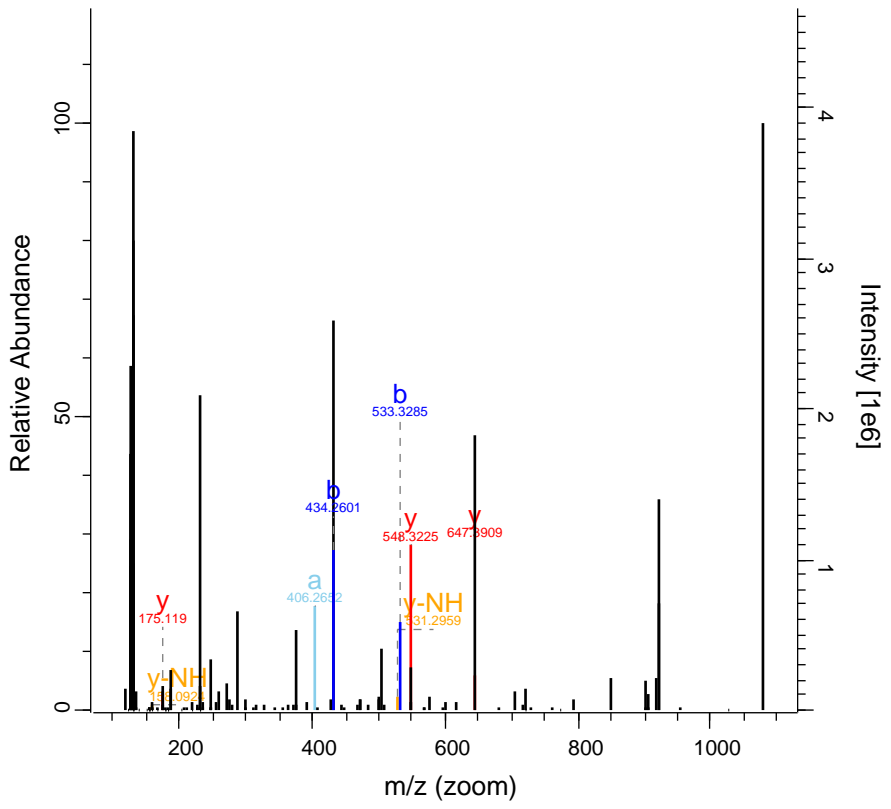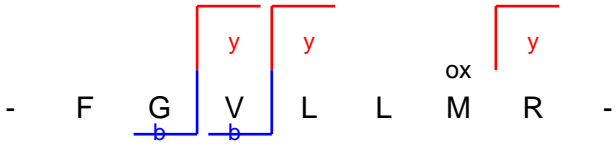

Raw File

Scan Method Score m/z

RO-QC-160121\_ZackD\_SS\_Set\_01\_Fraction\_11

15121 FTMS; HCD 60.79 378.21

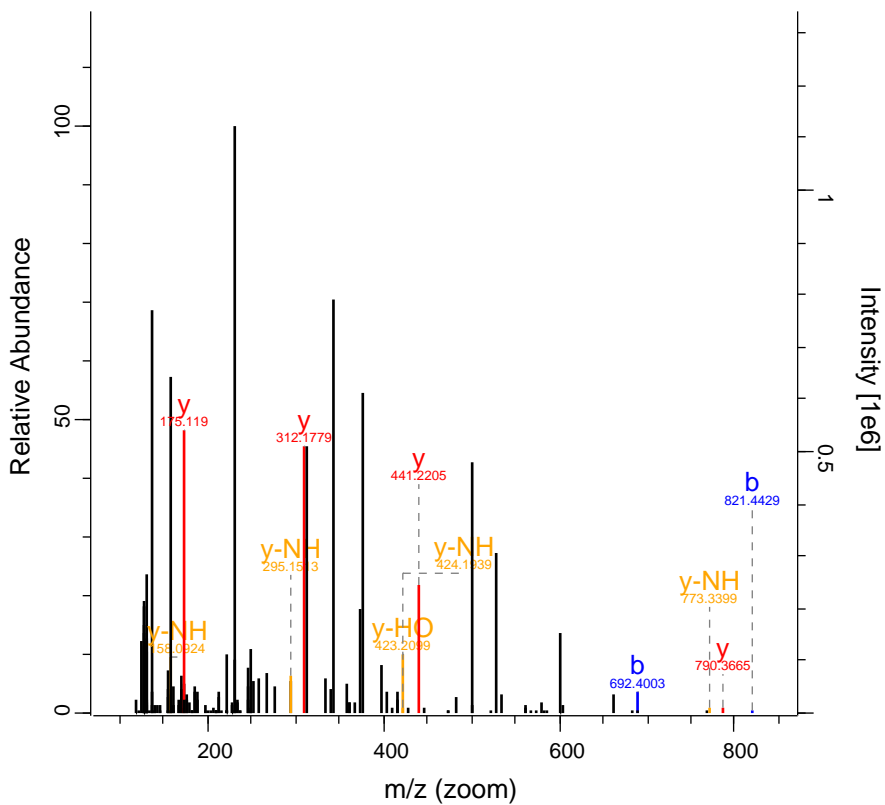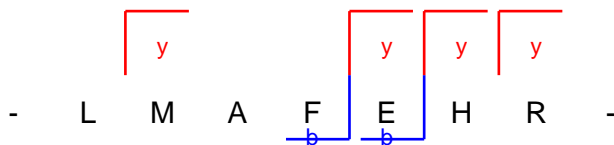

RO-QC-160121\_ZackD\_SS\_Set\_01\_Fraction 15978 FTMS; HC 70.91 403.91 C7orf43

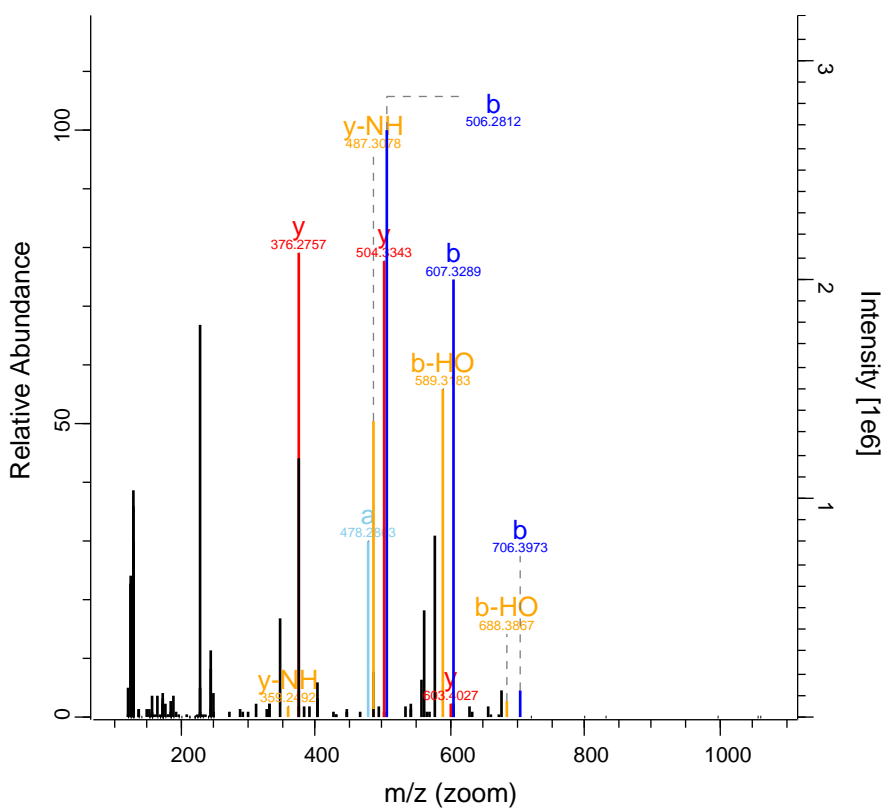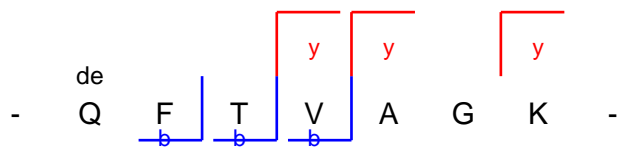



RO-QC-160121\_ZackD\_SS\_Set\_01\_Fraction 16327 FTMS; HC 98.63 608.34 UTS2

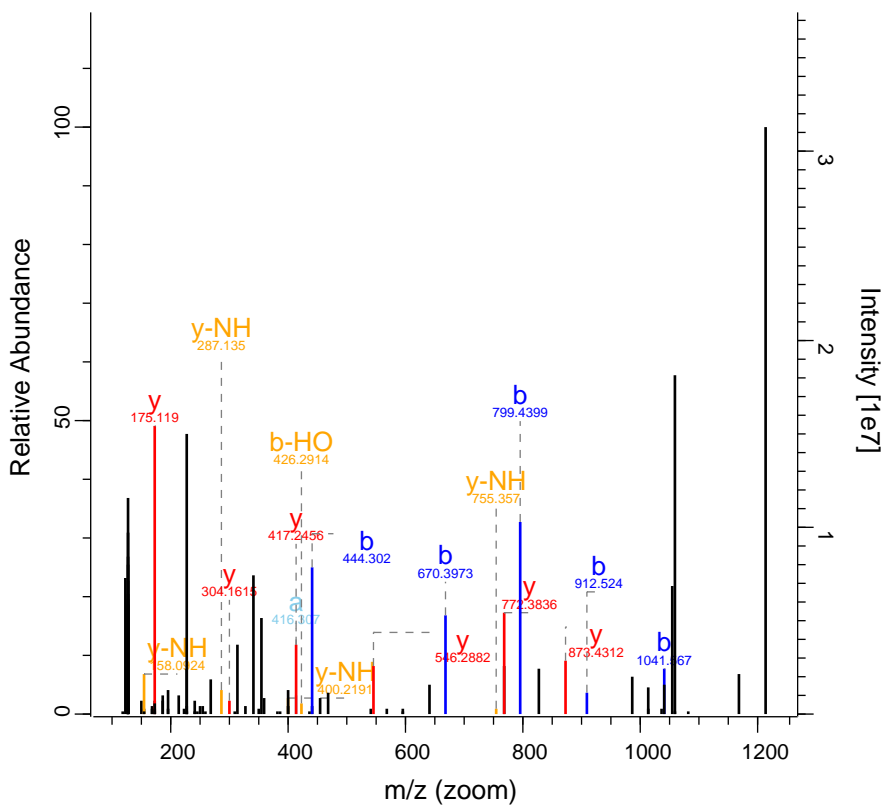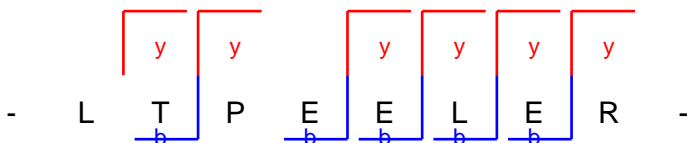

RO-QC-160121\_ZackD\_SS\_Set\_01\_Fraction16386 FTMS; HC 117.23 973.51 APOC3

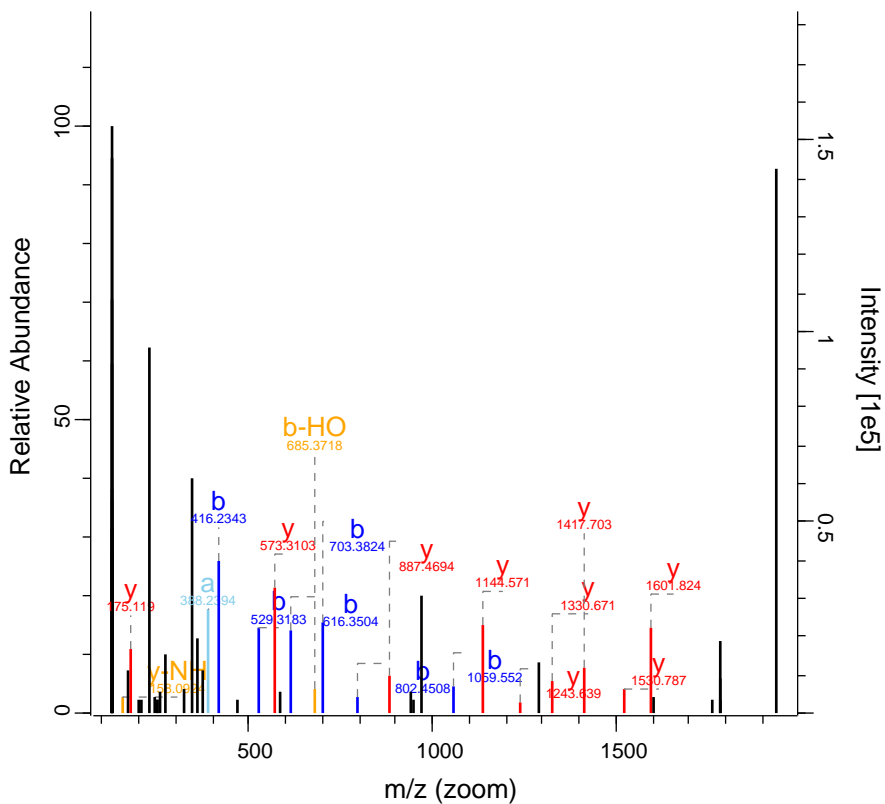

RO-QC-160121\_ZackD\_SS\_Set\_01\_Fraction 16432 FTMS; HC 111.74 405.9 UTS2

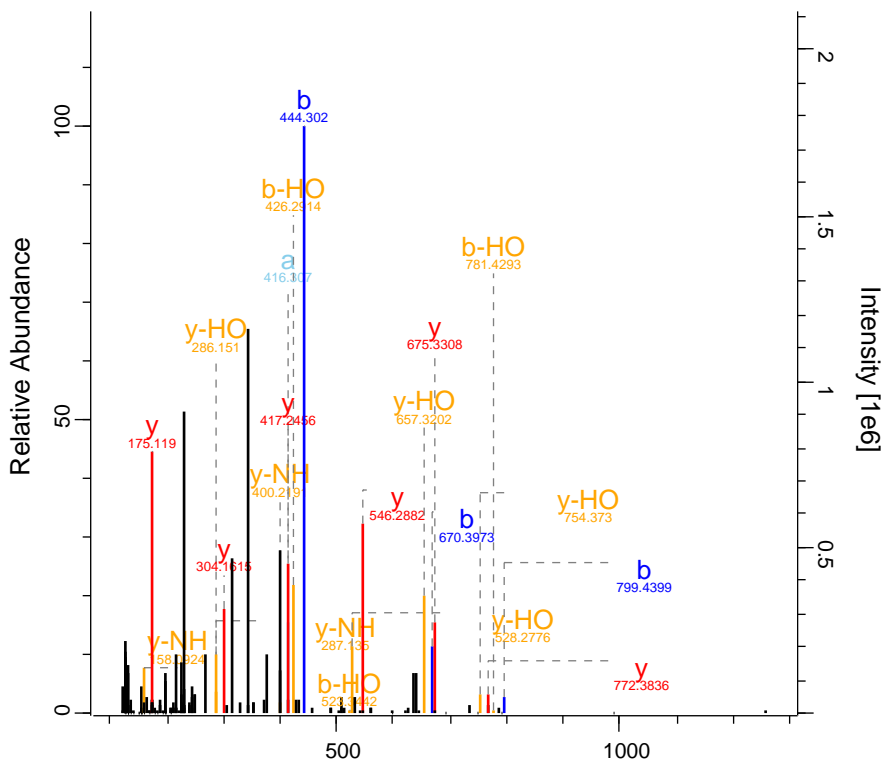

m/z (zoom)

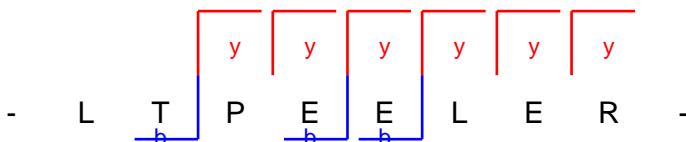

RO-QC-160121\_ZackD\_SS\_Set\_01\_Fraction 16451 FTMS; HC 143.96 897.99 CCDC59

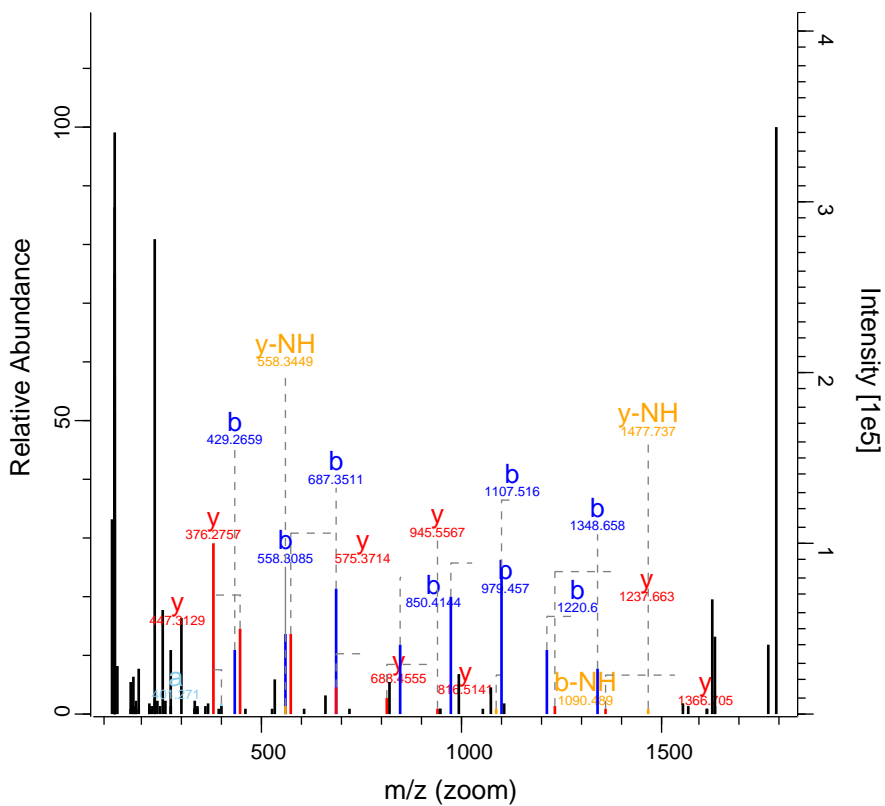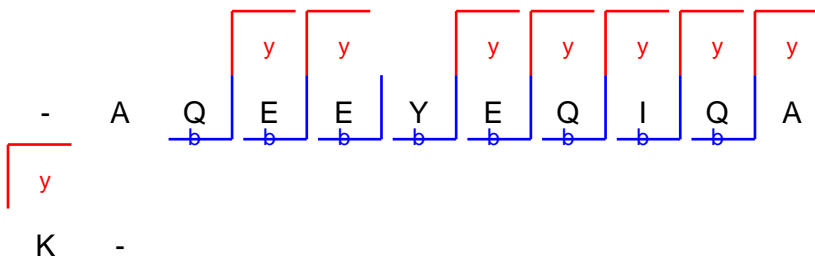

RO-QC-160121\_ZackD\_SS\_Set\_01\_Fraction 16568 FTMS; HC 98.46 608.34 UTS2

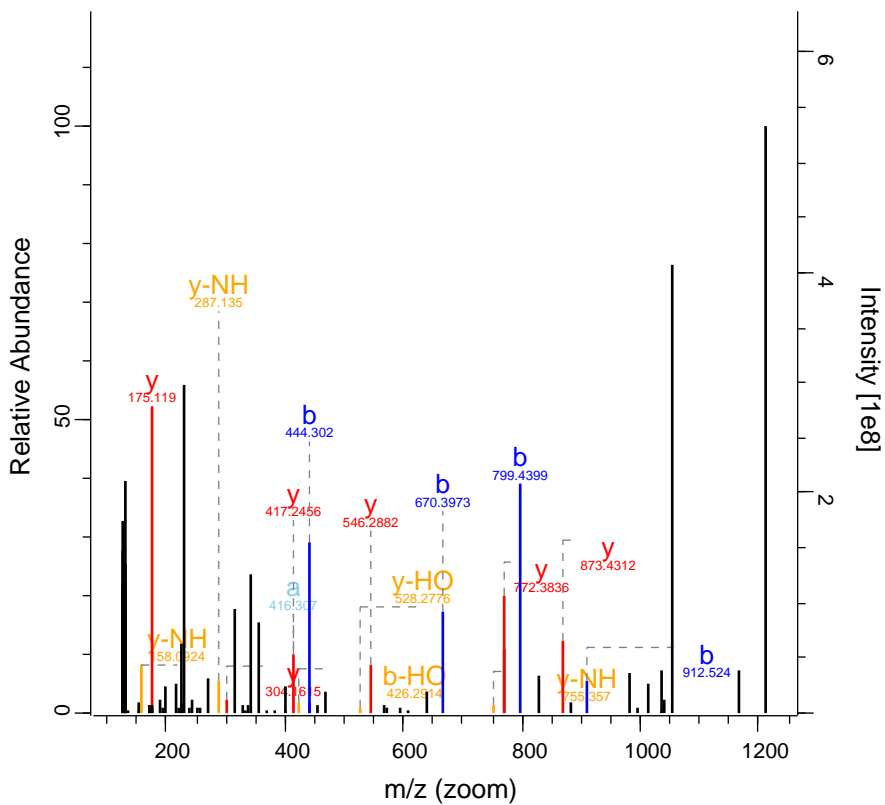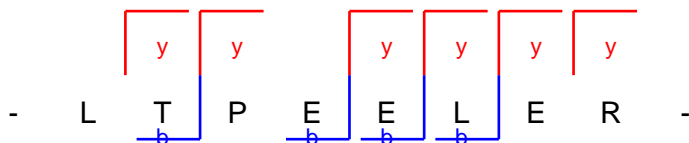

RO-QC-160121\_ZackD\_SS\_Set\_01\_Fraction16723 FTMS; HC 110.66 882.48 NTRK2

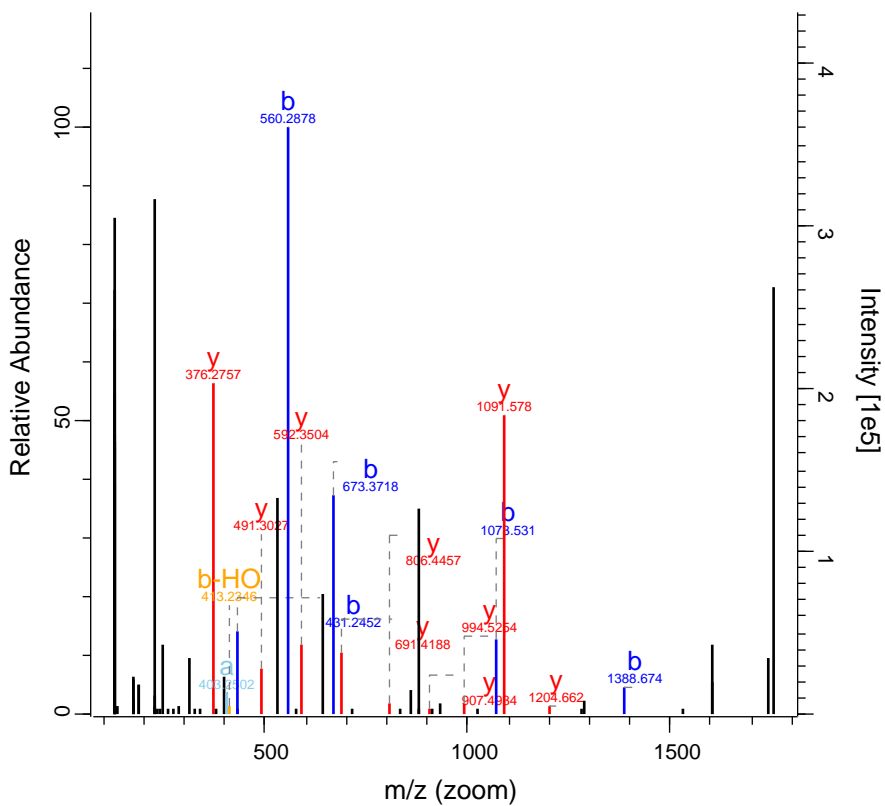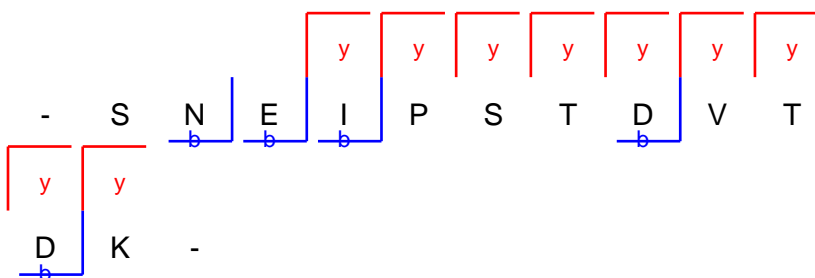

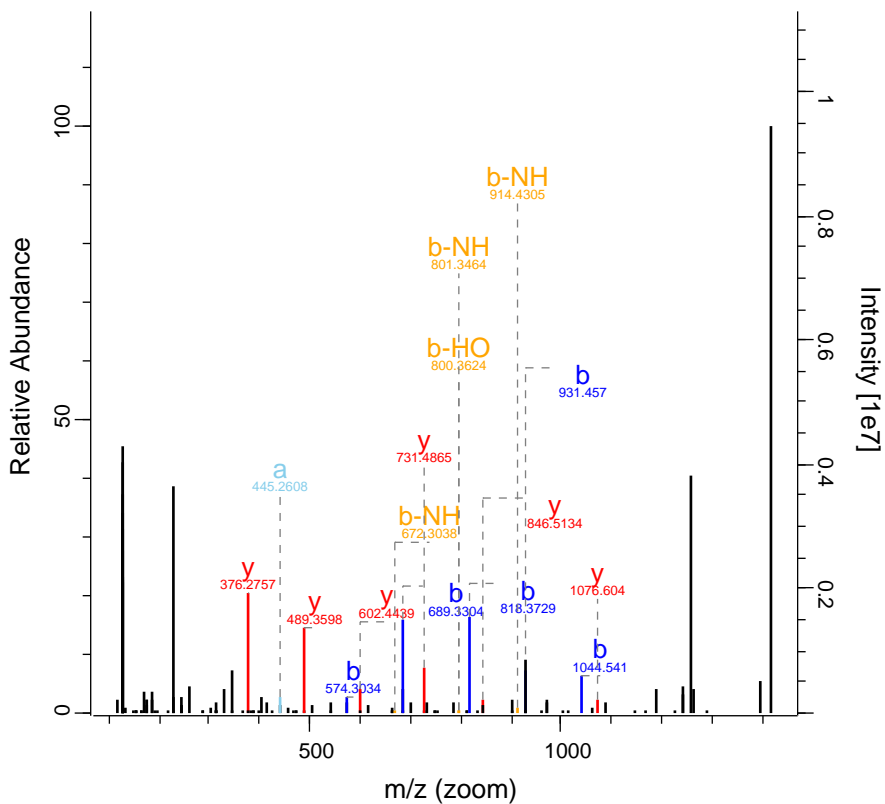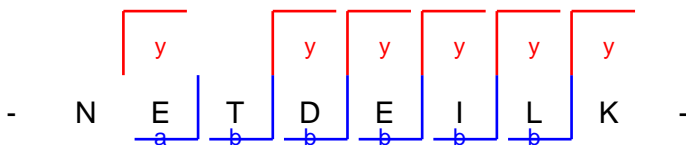

RO-QC-160121\_ZackD\_SS\_Set\_01\_Fraction1 17150 FTMS; HC 92.86 649.05 MAD2L1BP

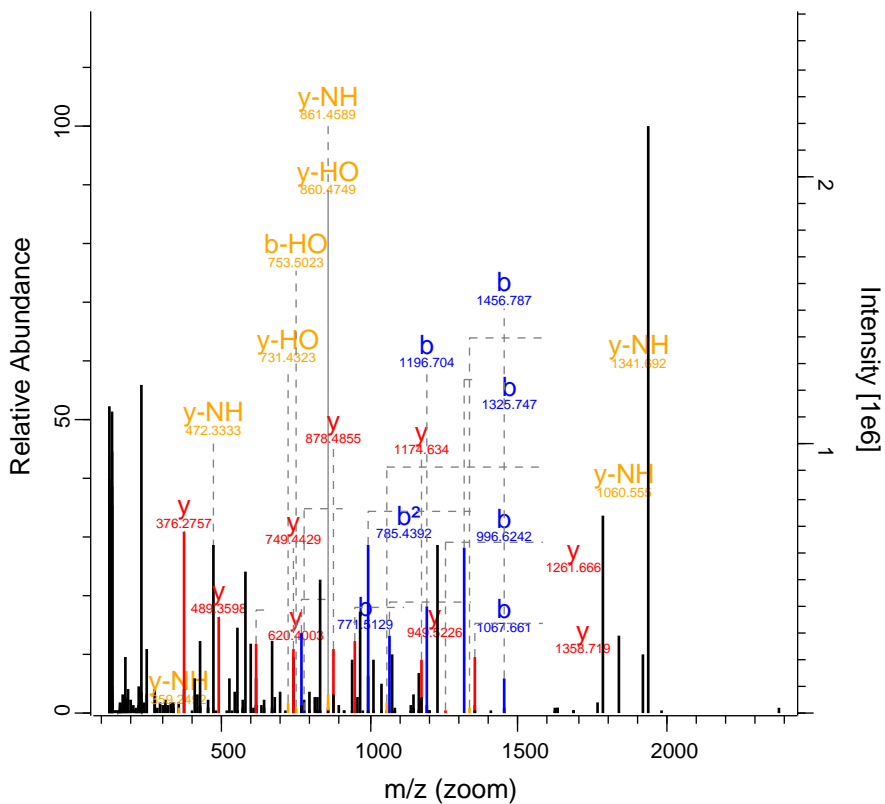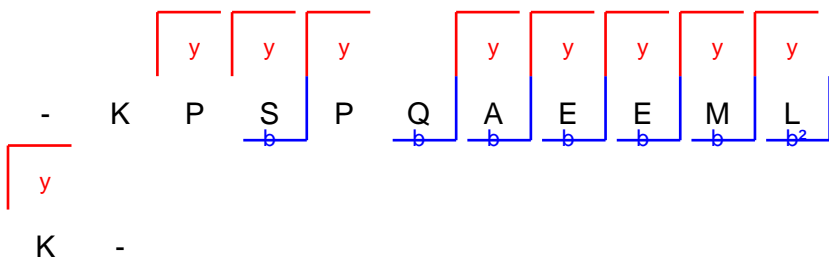

K -



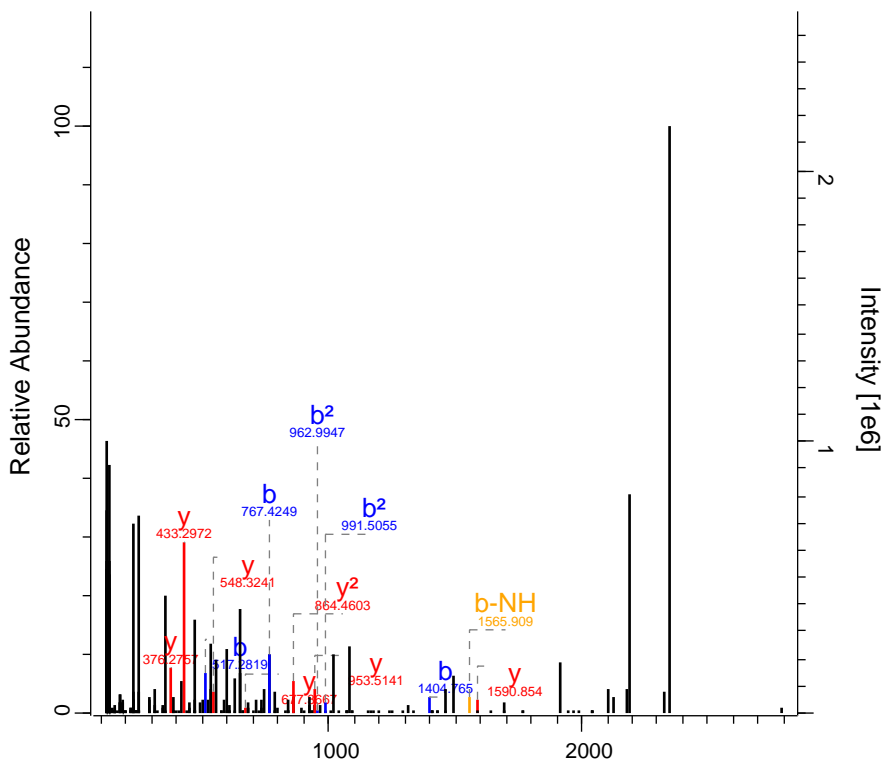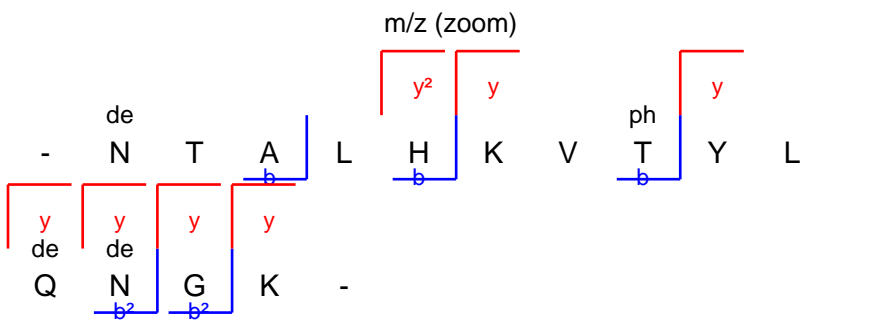

RO-QC-160121\_ZackD\_SS\_Set\_01\_Fraction 18919 FTMS; HC 49.55 709.44 PCDH17

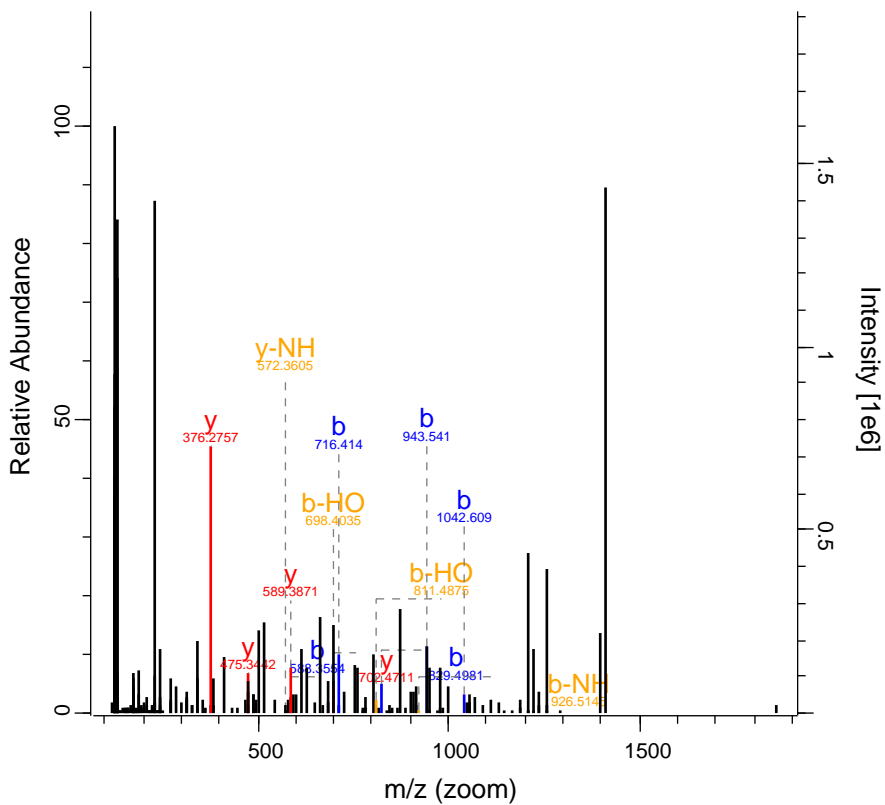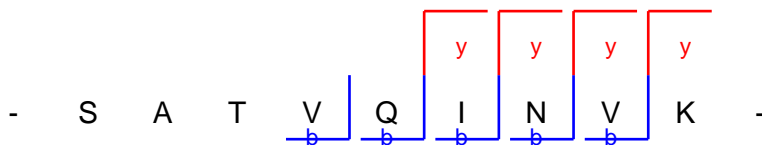

RO-QC-160121\_ZackD\_SS\_Set\_01\_Fraction 18951 FTMS; HC 40.35 473.63 PCDH17

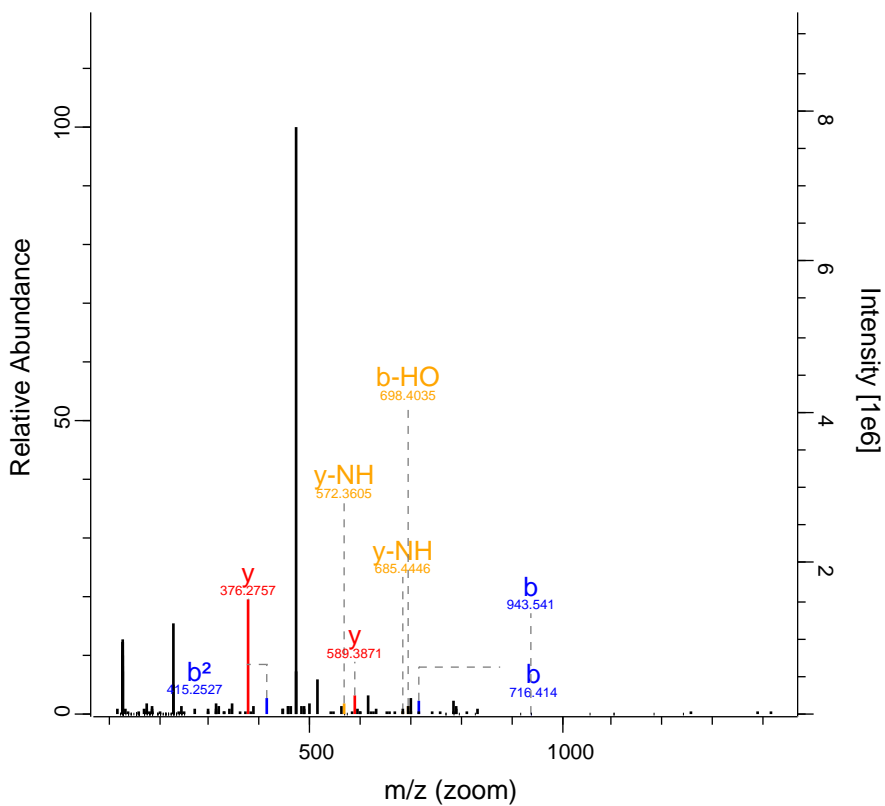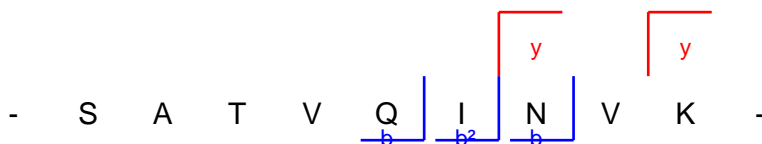

RO-QC-160121\_ZackD\_SS\_Set\_01\_Fraction1 19155 FTMS; HC 75.74 709.44 PCDH17

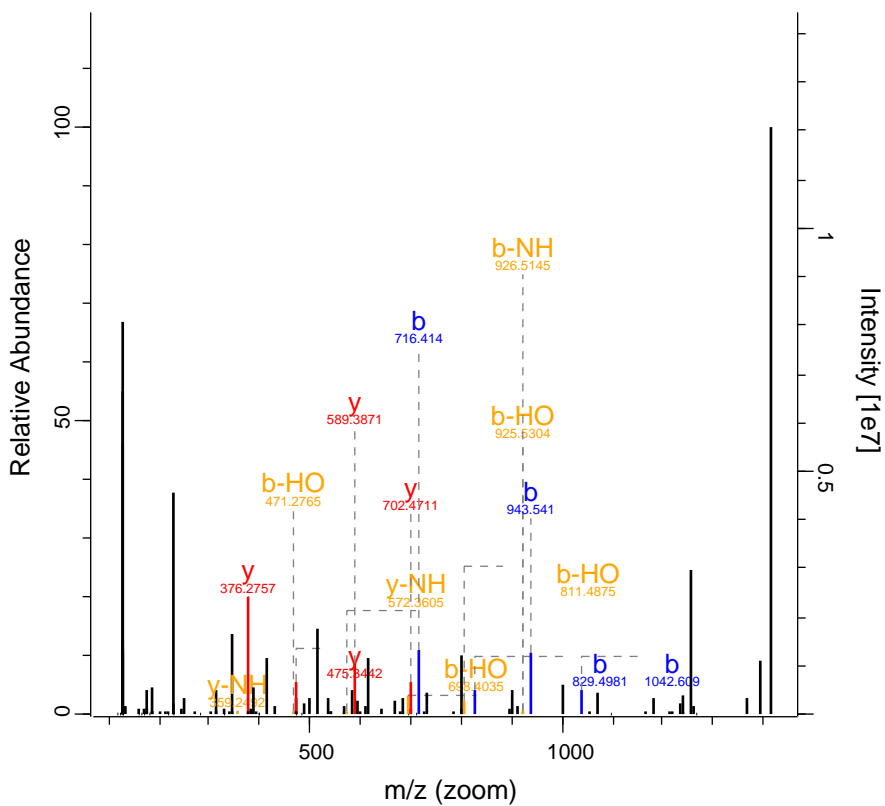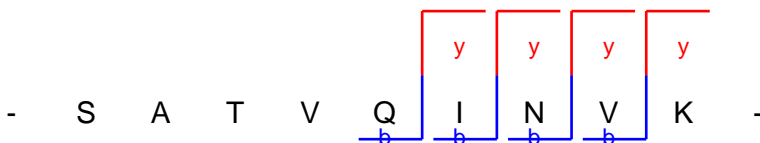

RO-QC-160121\_ZackD\_SS\_Set\_01\_Fraction 19187 FTMS; HC 68.02 473.3 PCDH17

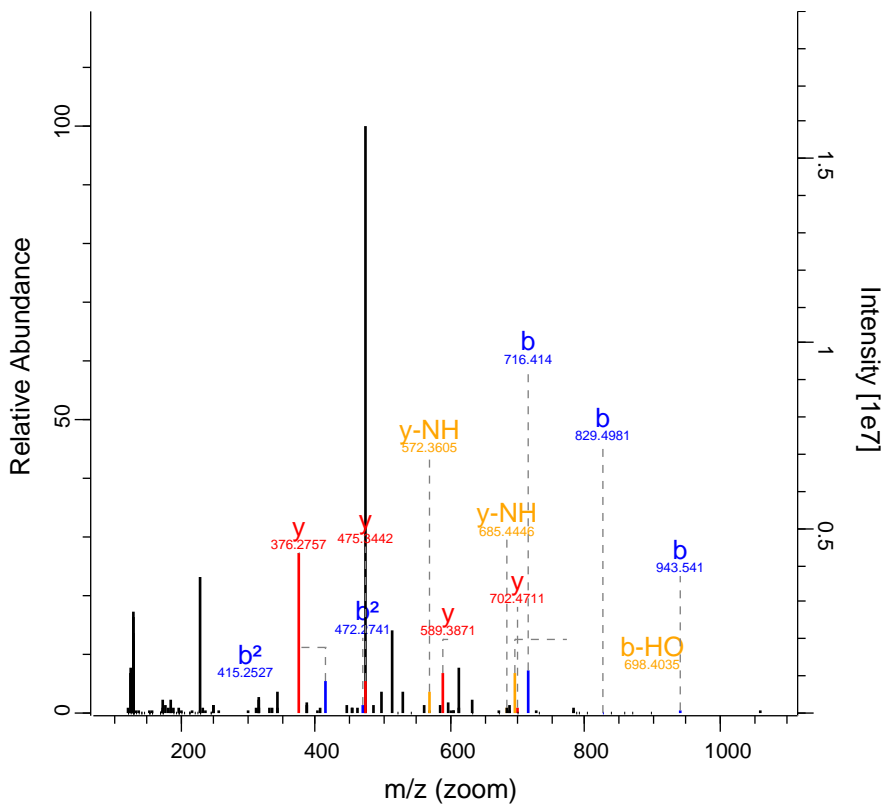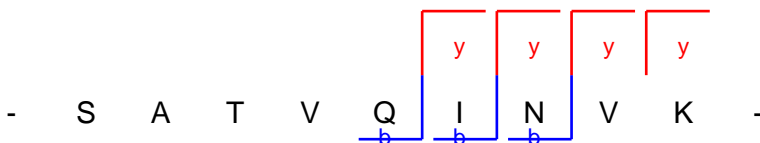

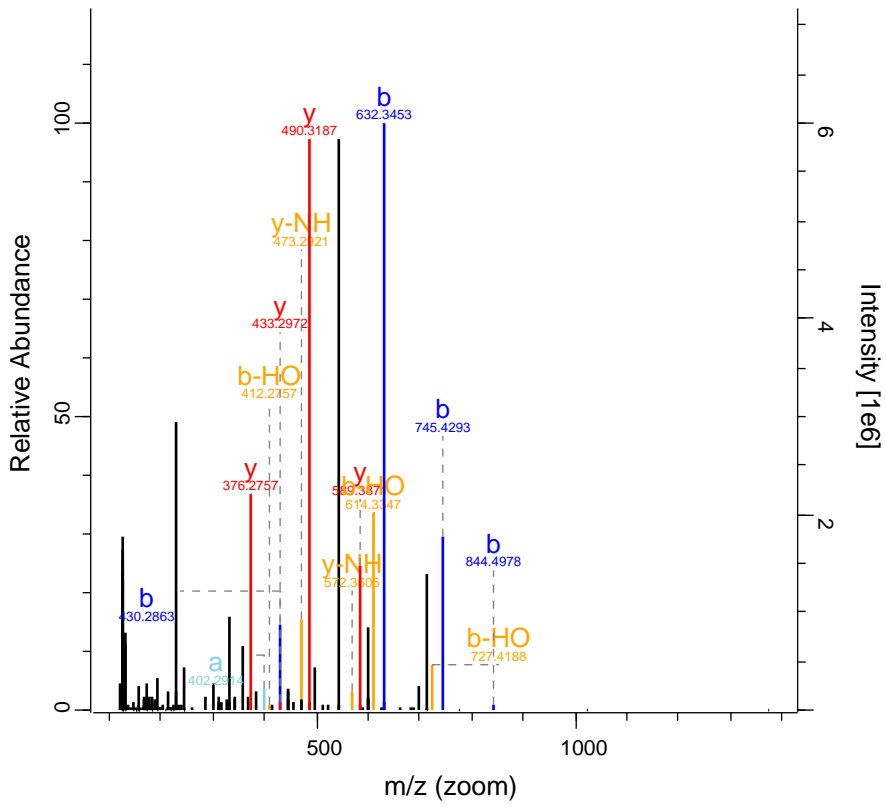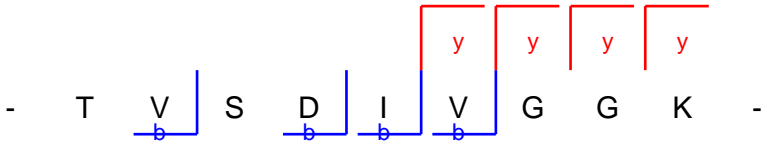

RO-QC-160121\_ZackD\_SS\_Set\_01\_Fraction 20032 FTMS; HC 40.96 800.1 ATP6V0C

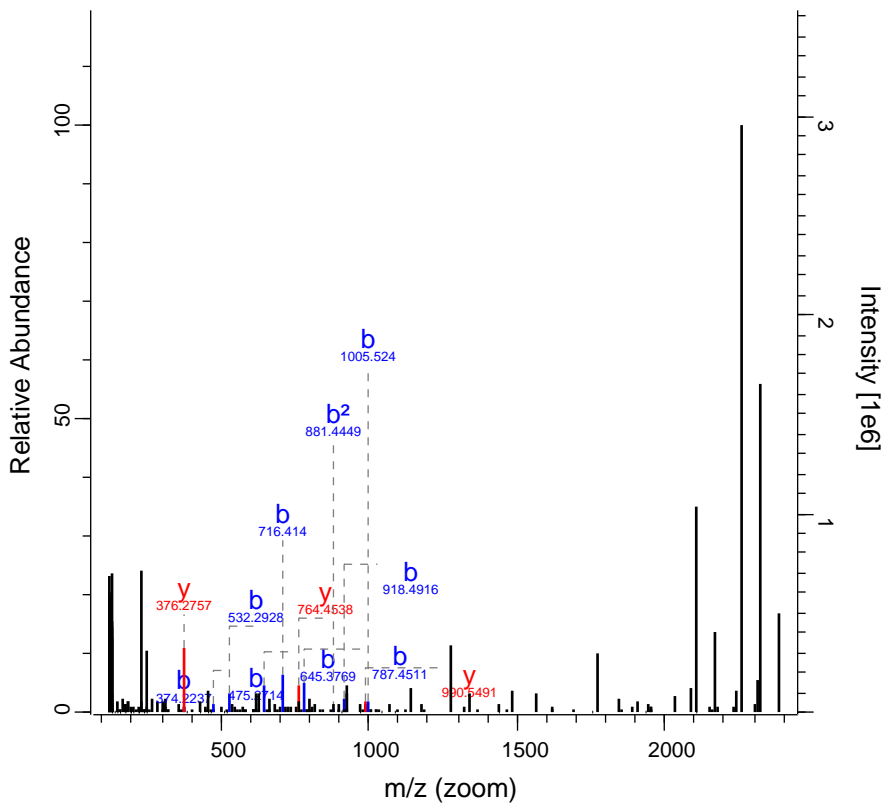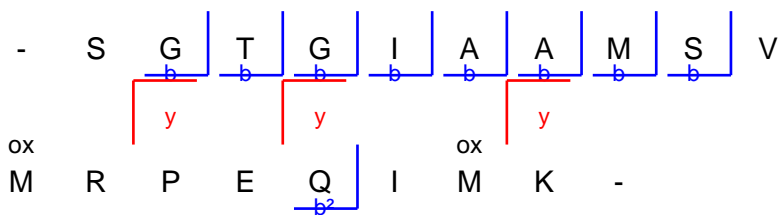

RO-QC-160121\_ZackD\_SS\_Set\_01\_Fraction1 20111 FTMS; HC 192.44 773.42 ZMYM6NB

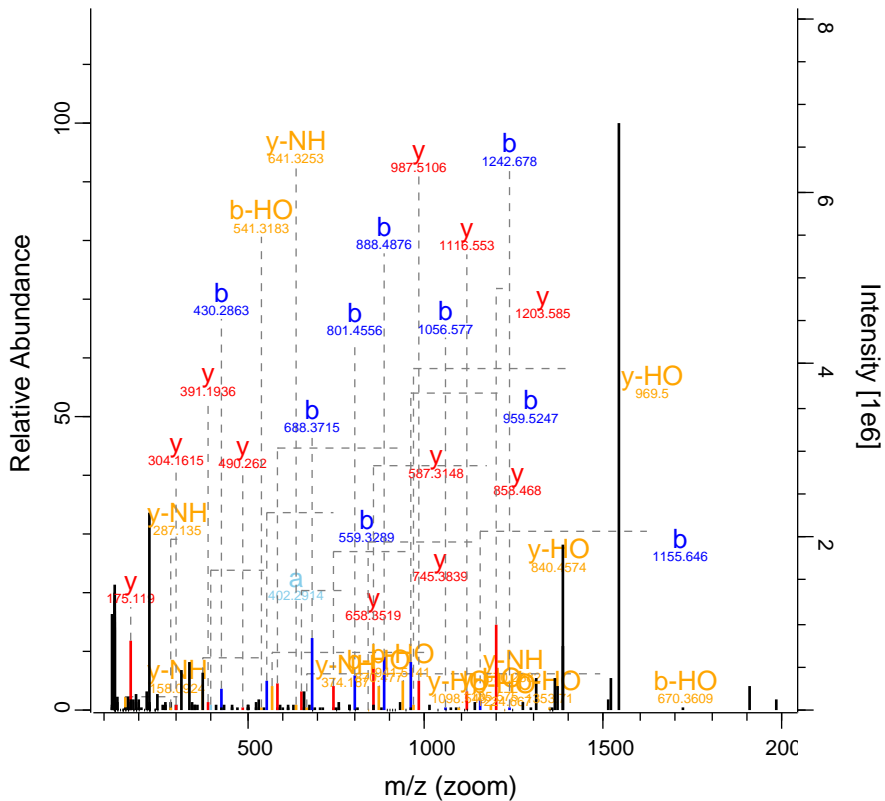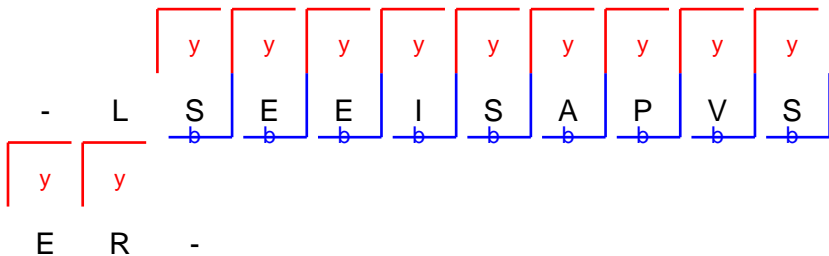



RO-QC-160121\_ZackD\_SS\_Set\_01\_Fraction 20385 FTMS; HC 90.15 509.61 CPA6

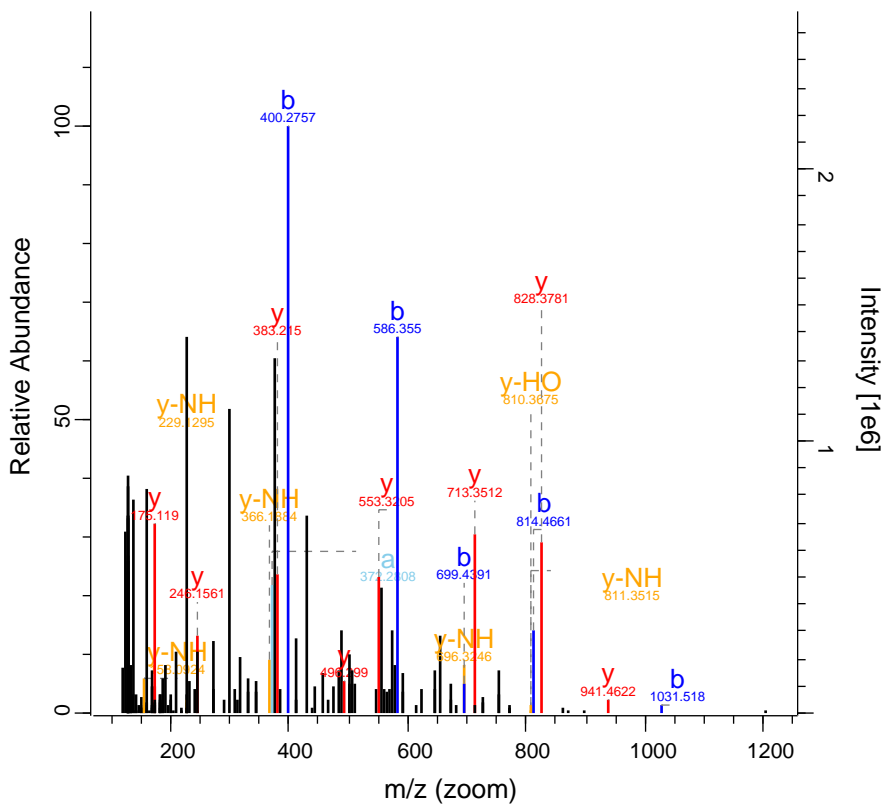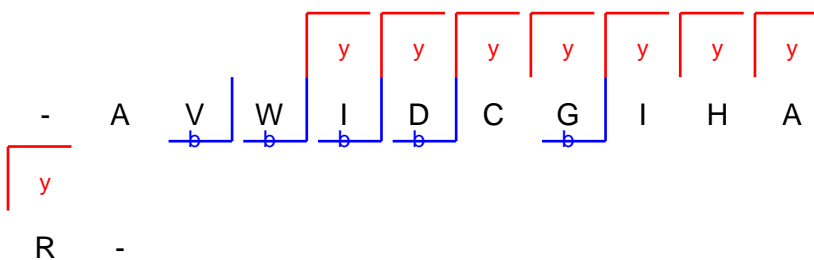

RO-QC-160121\_ZackD\_SS\_Set\_01\_Fraction 21107 FTMS; HC 169.21 861.95 RCBTB2

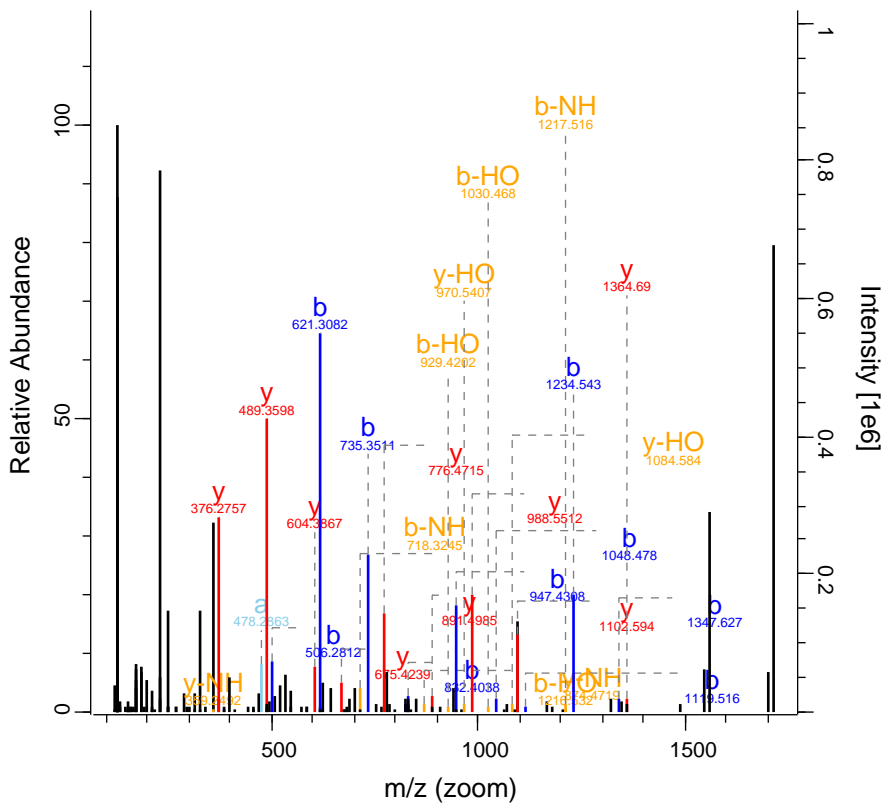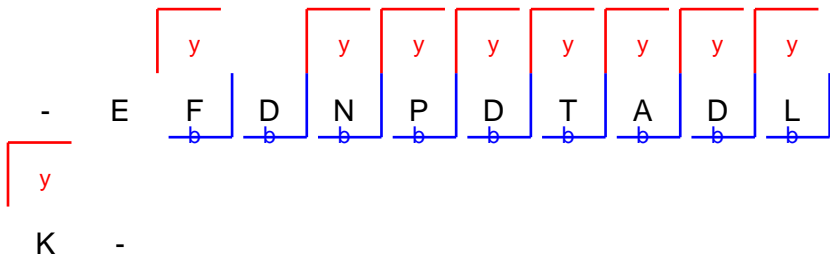



RO-QC-160121\_ZackD\_SS\_Set\_01\_Fraction 21574 FTMS; HC 106.2 711.88 CD58

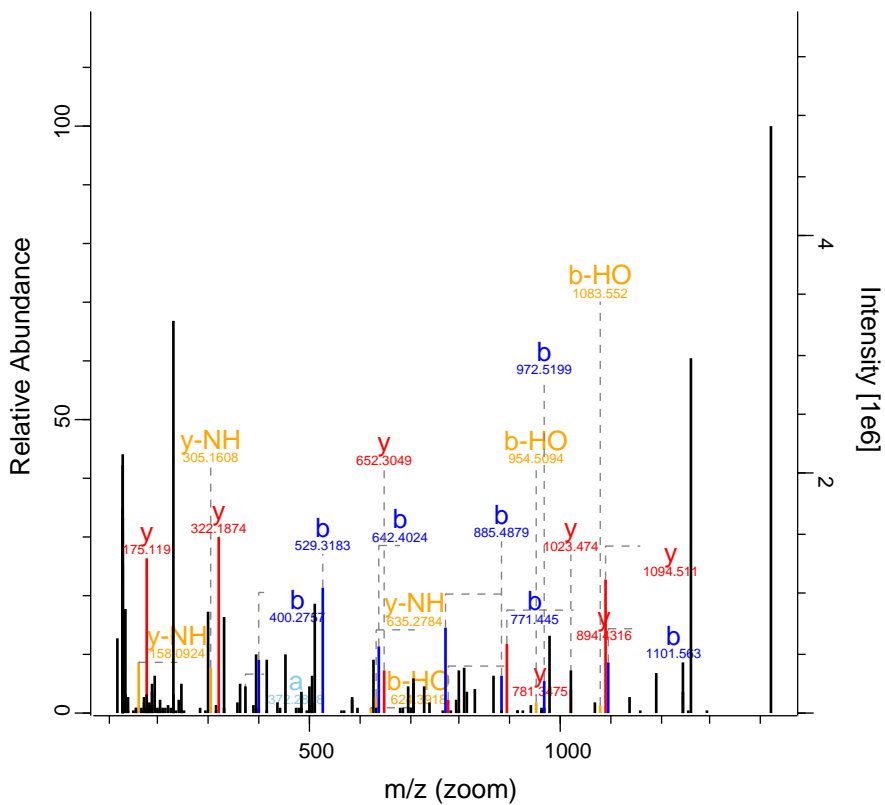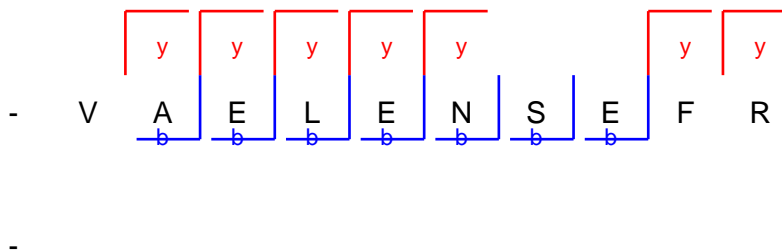

RO-QC-160121\_ZackD\_SS\_Set\_01\_Fraction1 21901 FTMS; HC 147.74 855.46 RCBTB1

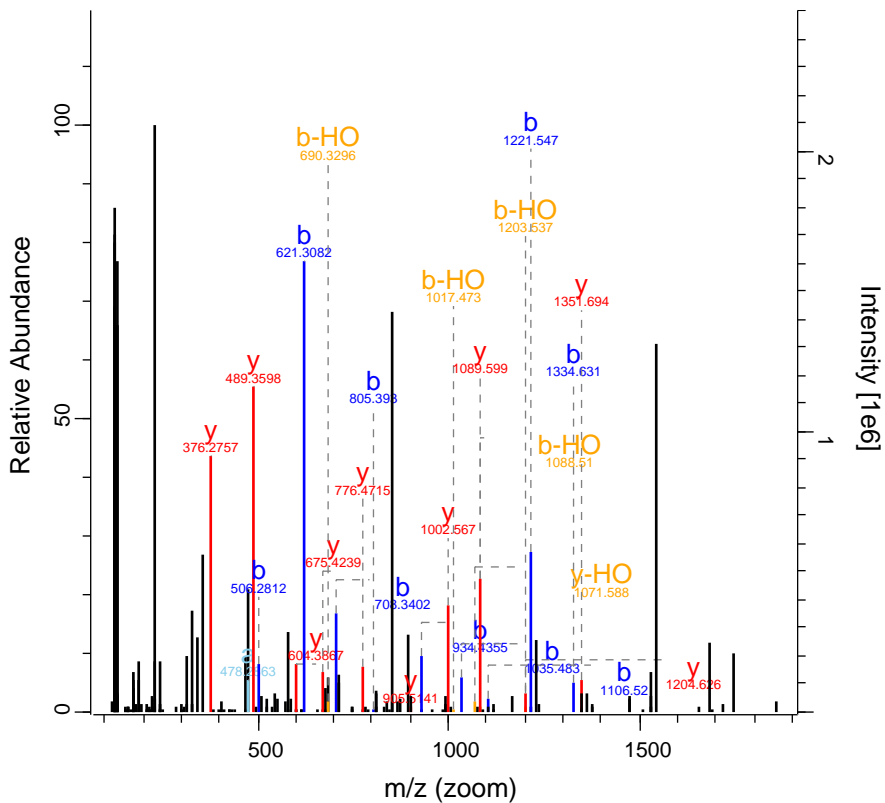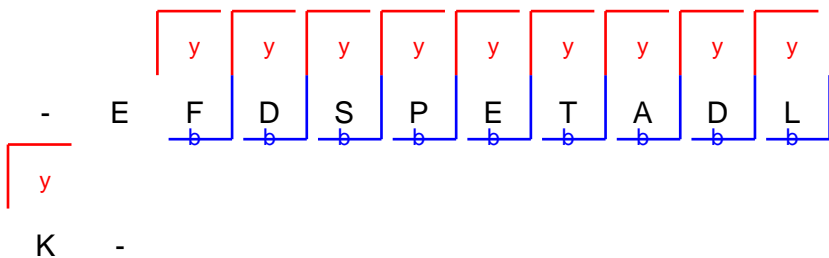

RO-QC-160121\_ZackD\_SS\_Set\_01\_Fraction 21981 FTMS; HC 92.49 522.3 SAMD8

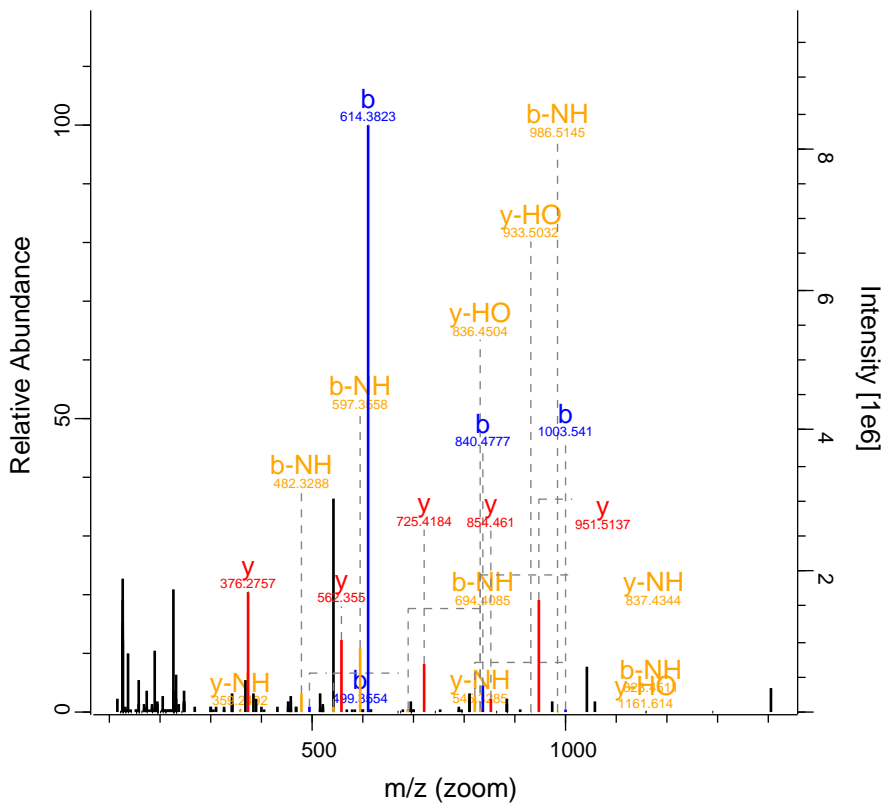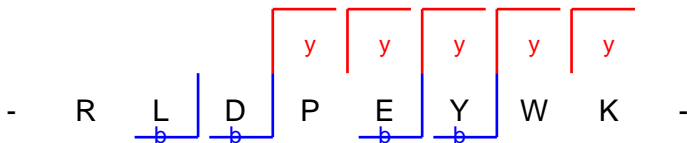

RO-QC-160121\_ZackD\_SS\_Set\_01\_Fraction 22783 FTMS; HC 77.67 806.45 GSDMA

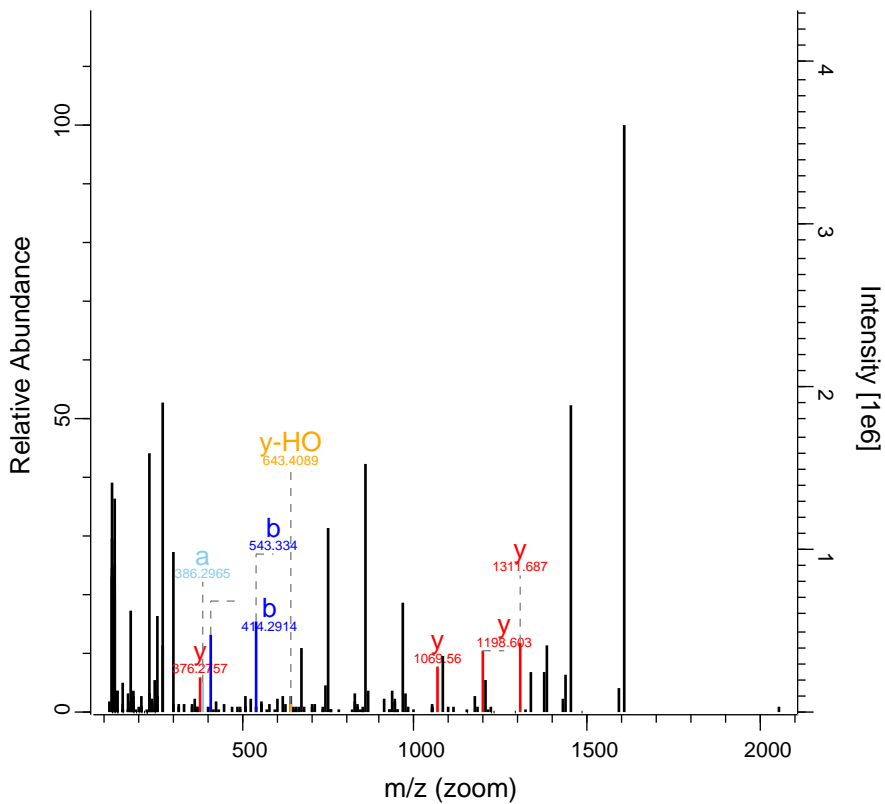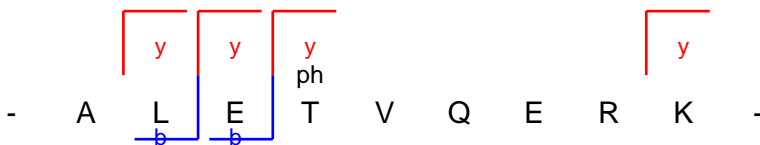

RO-QC-160121\_ZackD\_SS\_Set\_01\_Fraction 23408 FTMS; HC 86.01 497.63 ZNF487

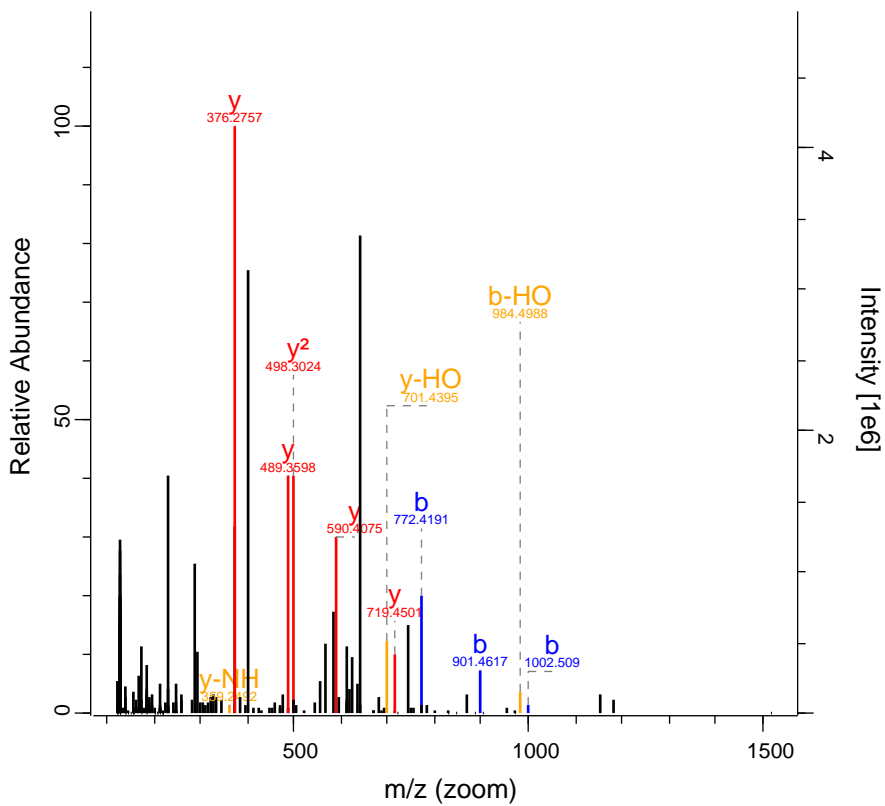

m/z (zoom)

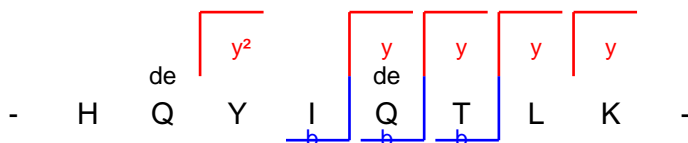



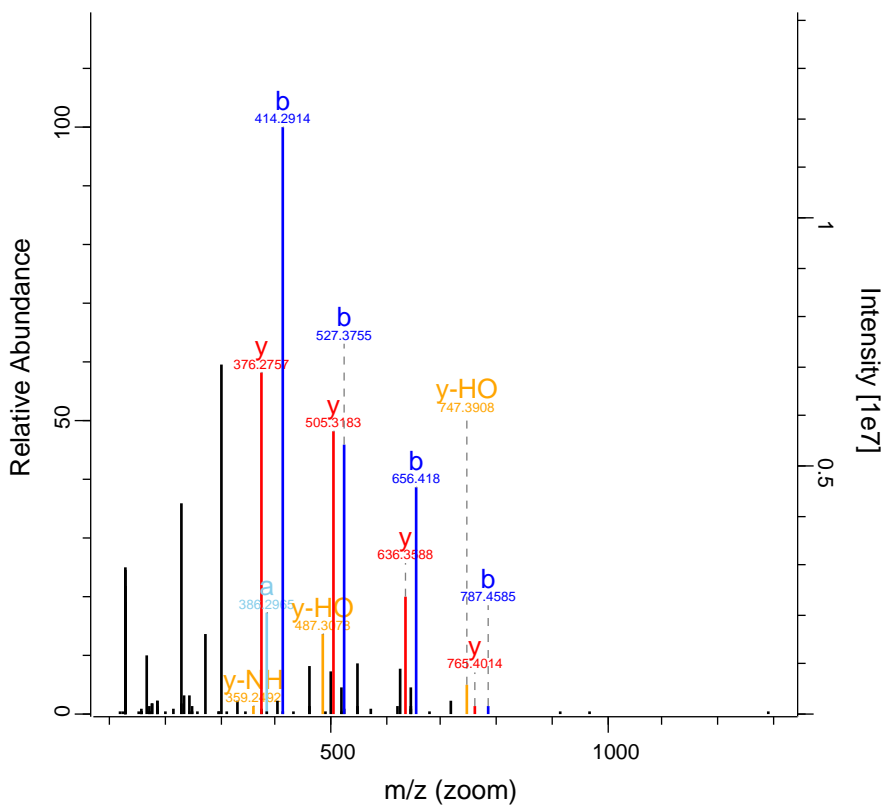

m/z (zoom)

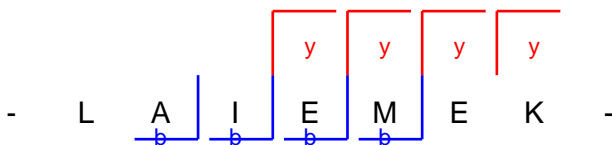

RO-QC-160121\_ZackD\_SS\_Set\_01\_Fraction 23718 FTMS; HC 136.3 589.61 TMBIM1

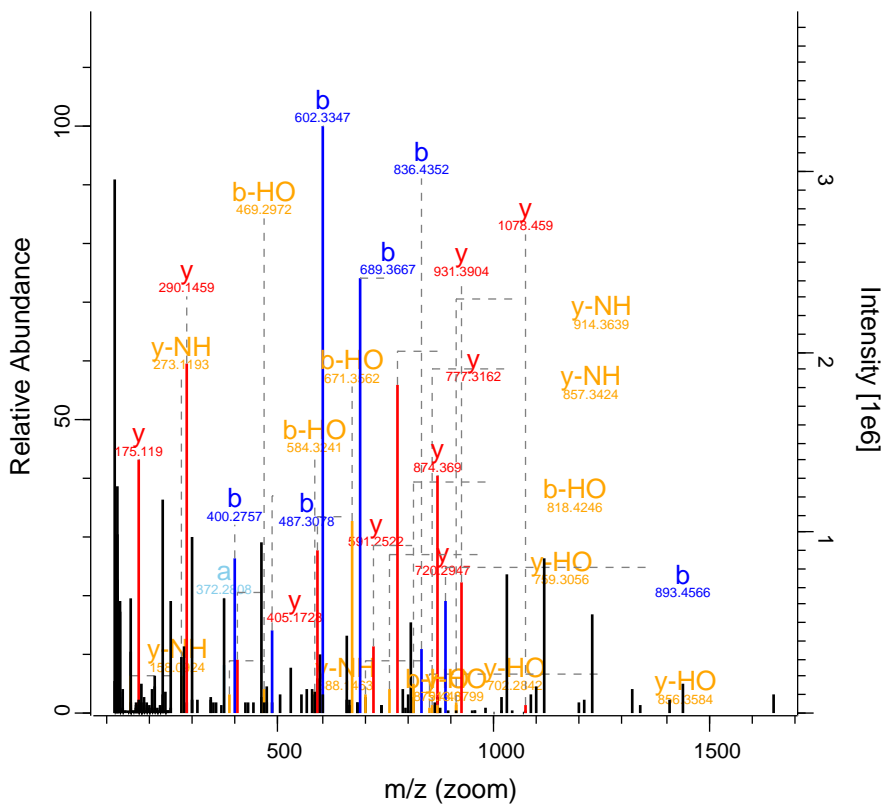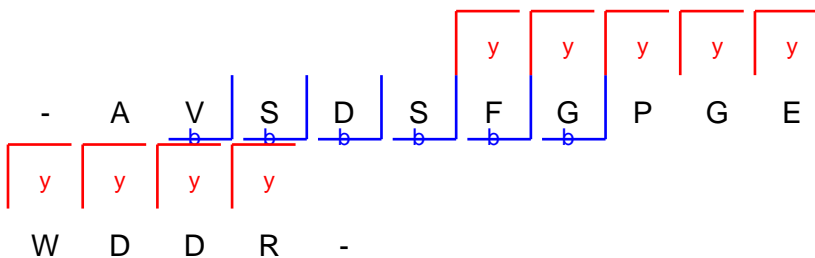

RO-QC-160121\_ZackD\_SS\_Set\_01\_Fraction 23826 FTMS; HC 289.71 883.91 TMBIM1

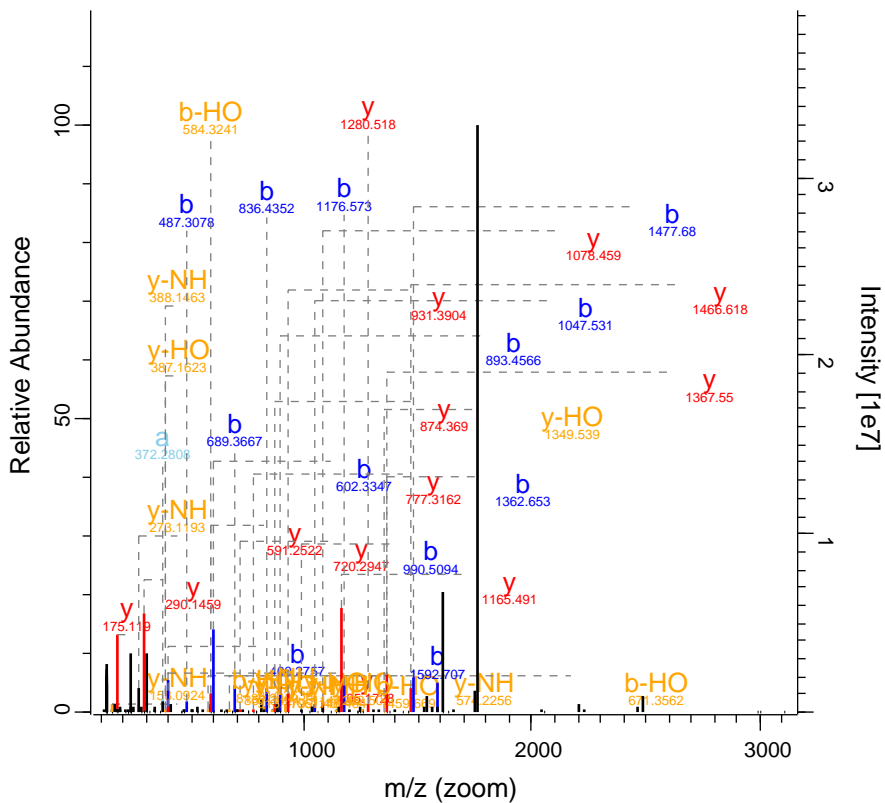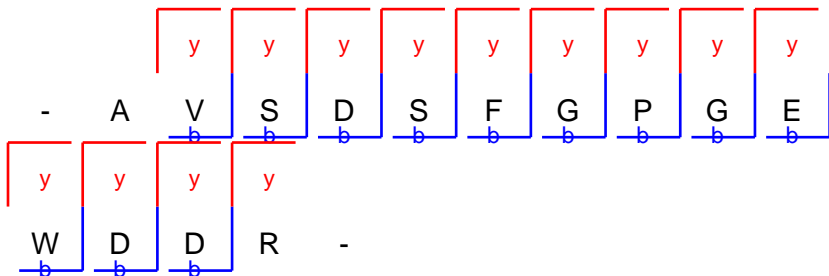

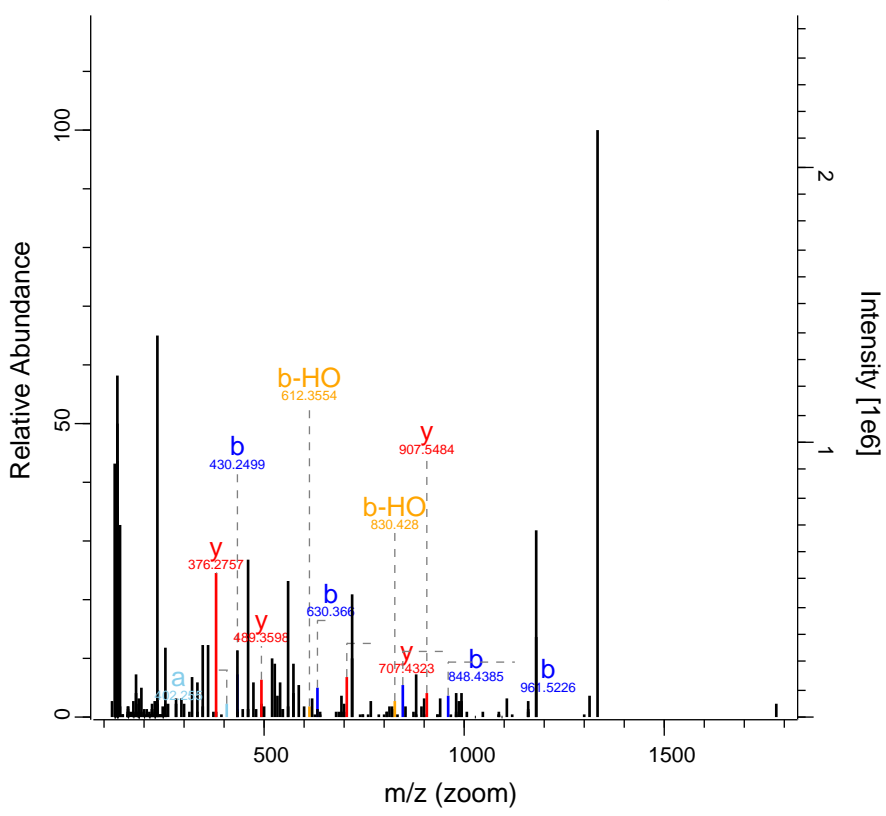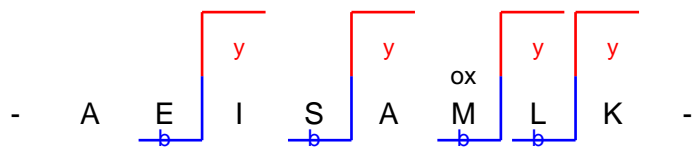













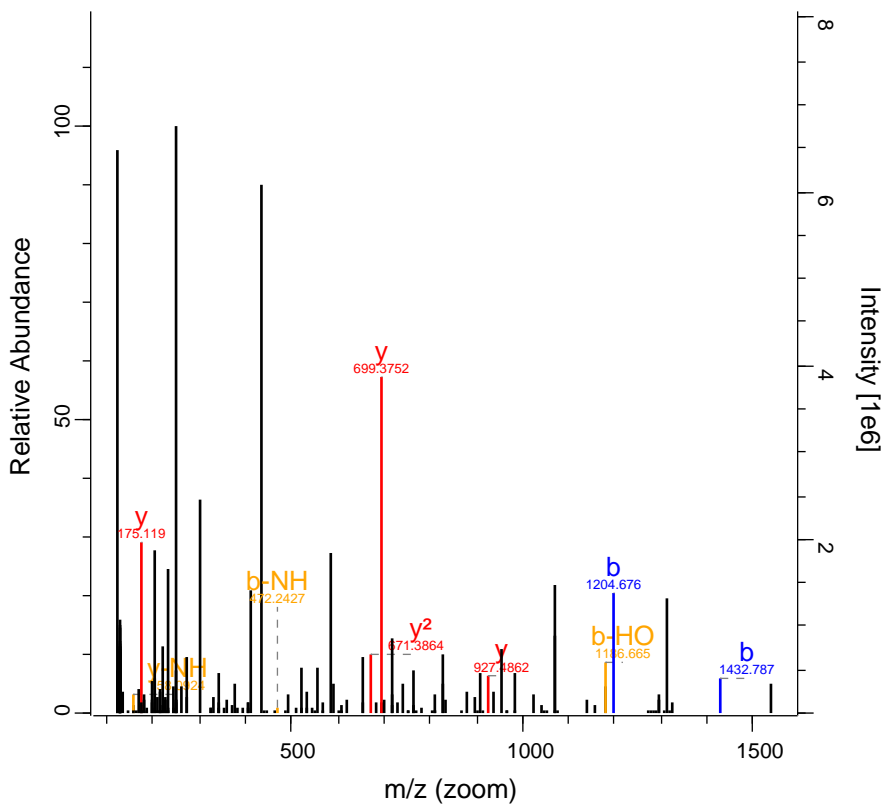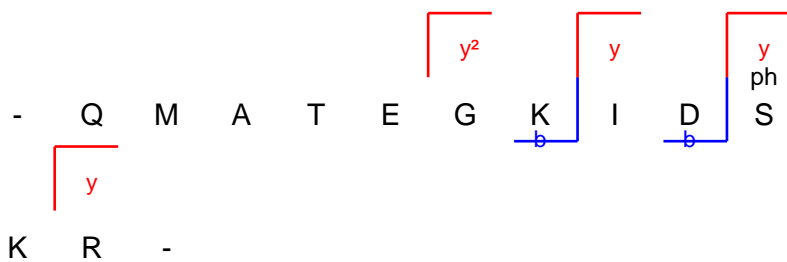

RO-QC-160121\_ZackD\_SS\_Set\_01\_Fraction 27364 FTMS; HC 93.37 596.32 DRAM1

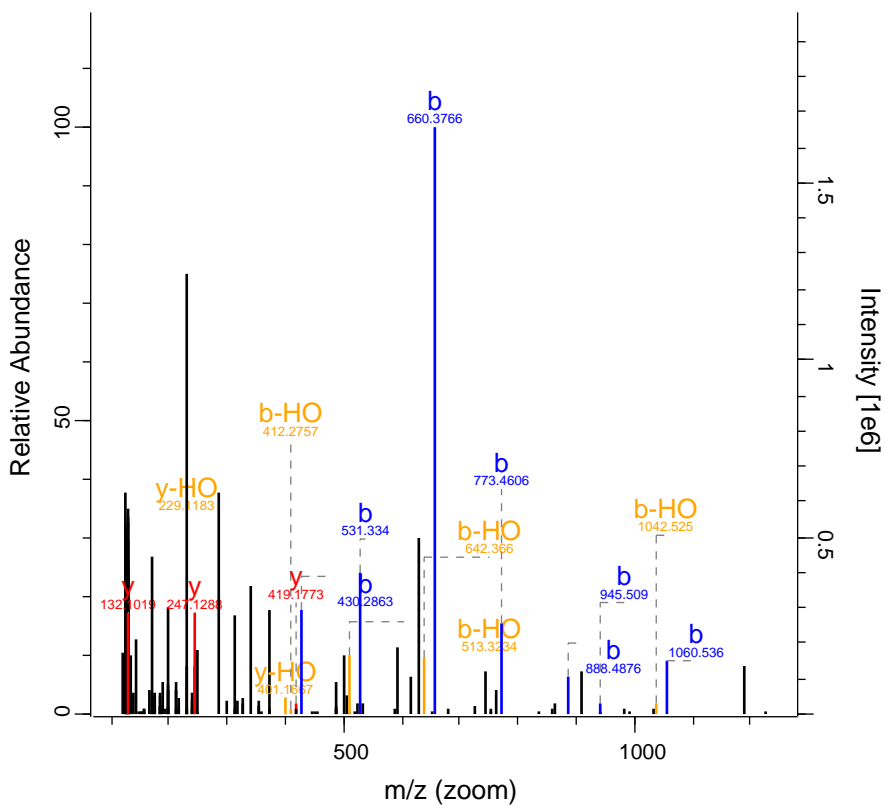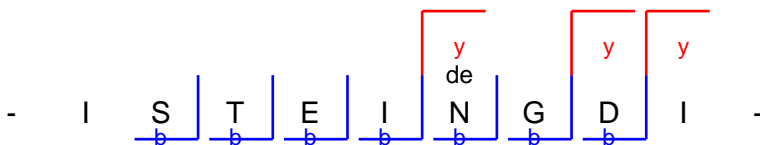

RO-QC-160121\_ZackD\_SS\_Set\_01\_Fraction 28573 FTMS; HC 77.39 781.11 MDFIC

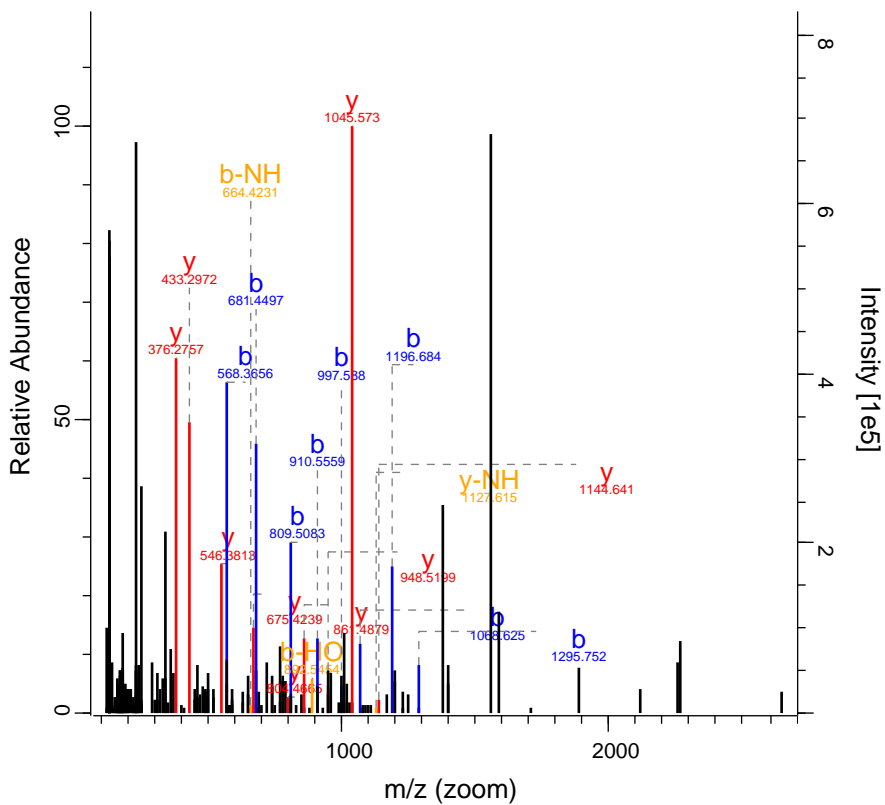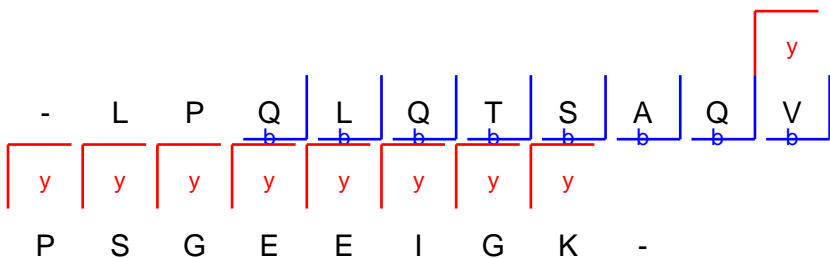

RO-QC-160121\_ZackD\_SS\_Set\_01\_Fraction 28985 FTMS; HC 138.71 811.42 ANKRD49

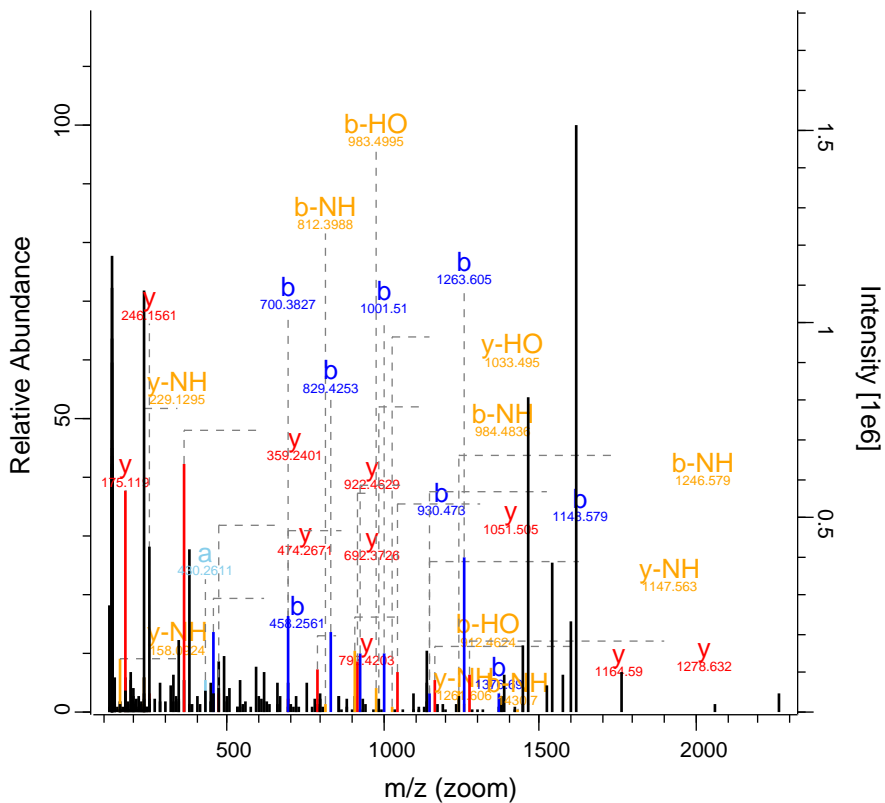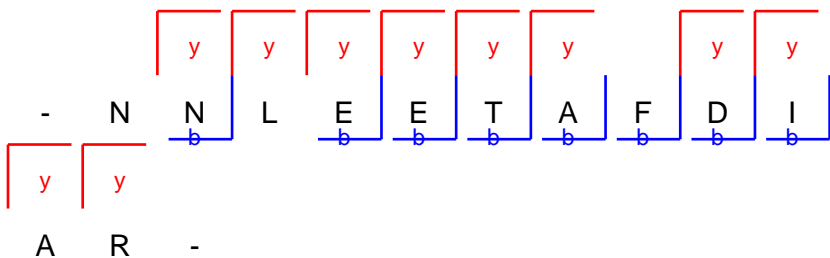

RO-QC-160121\_ZackD\_SS\_Set\_01\_Fraction 30095 FTMS; HC 107.9 851.02 ST8SIA2

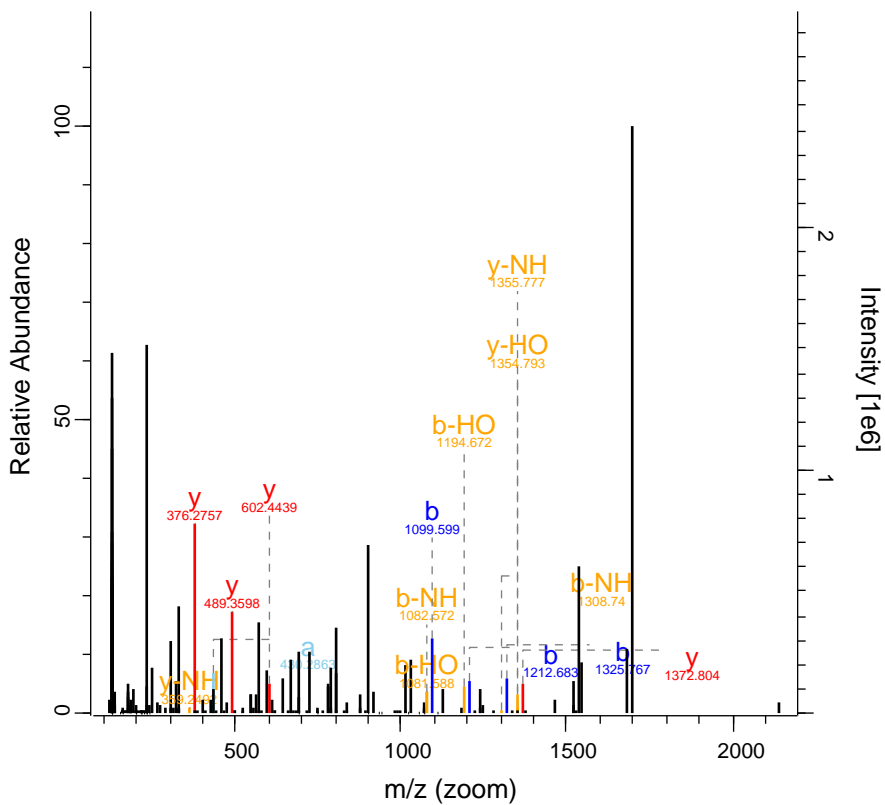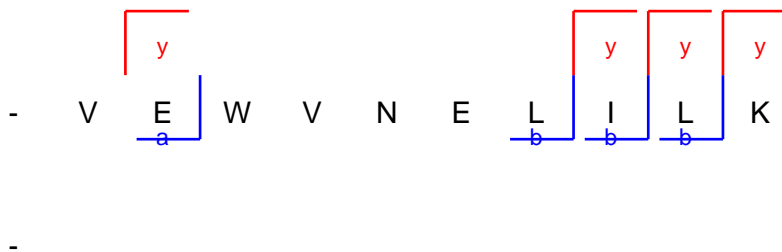

RO-QC-160121\_ZackD\_SS\_Set\_01\_Fraction1 30205 FTMS; HC 111.77 841.75 CNIH4

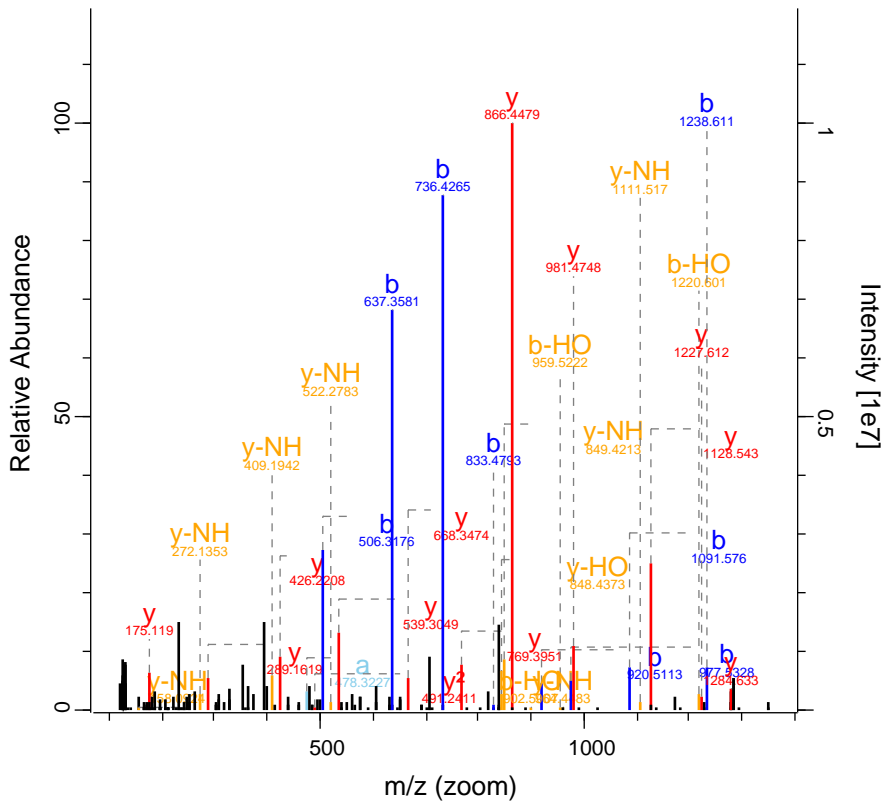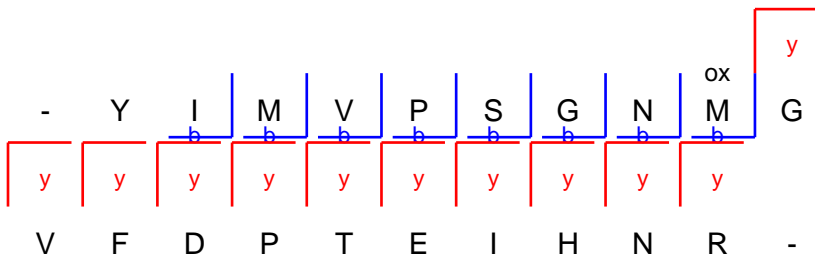

RO-QC-160121\_ZackD\_SS\_Set\_01\_Fraction 30228 FTMS; HC 52.73 631.57 CNIH4

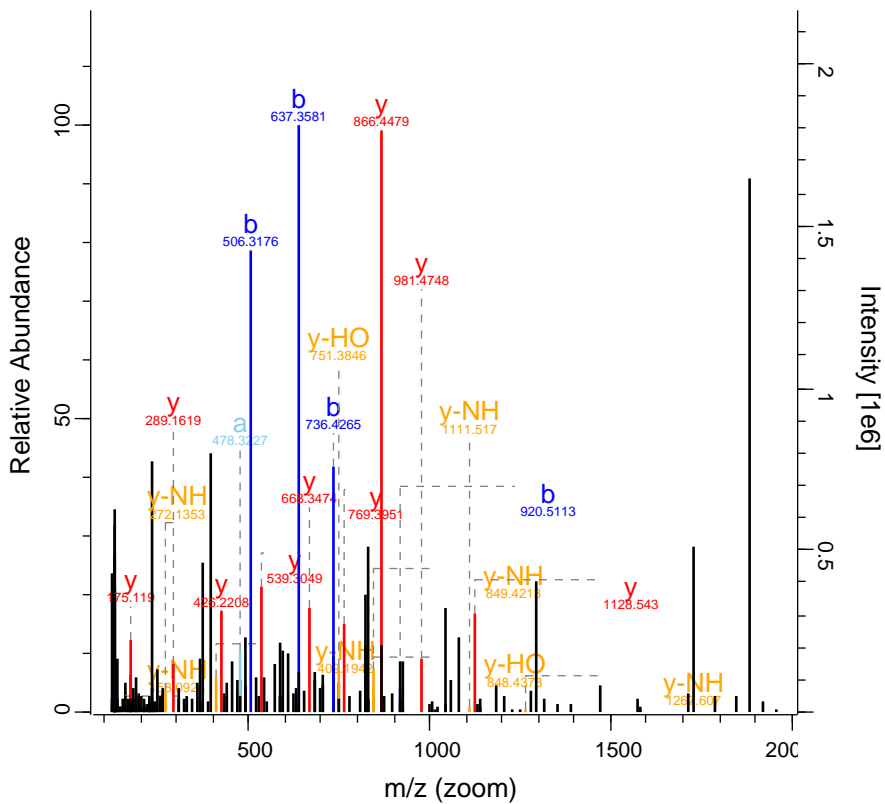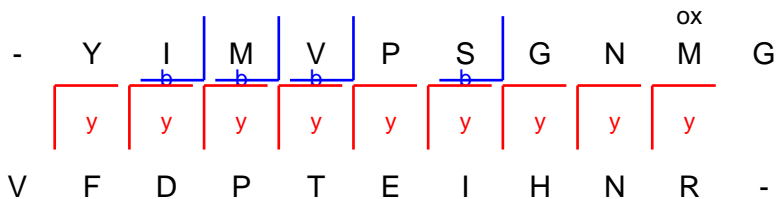





RO-QC-160121\_ZackD\_SS\_Set\_01\_Fratio 30749 FTMS; HC 184.03 1056.54 EMP3

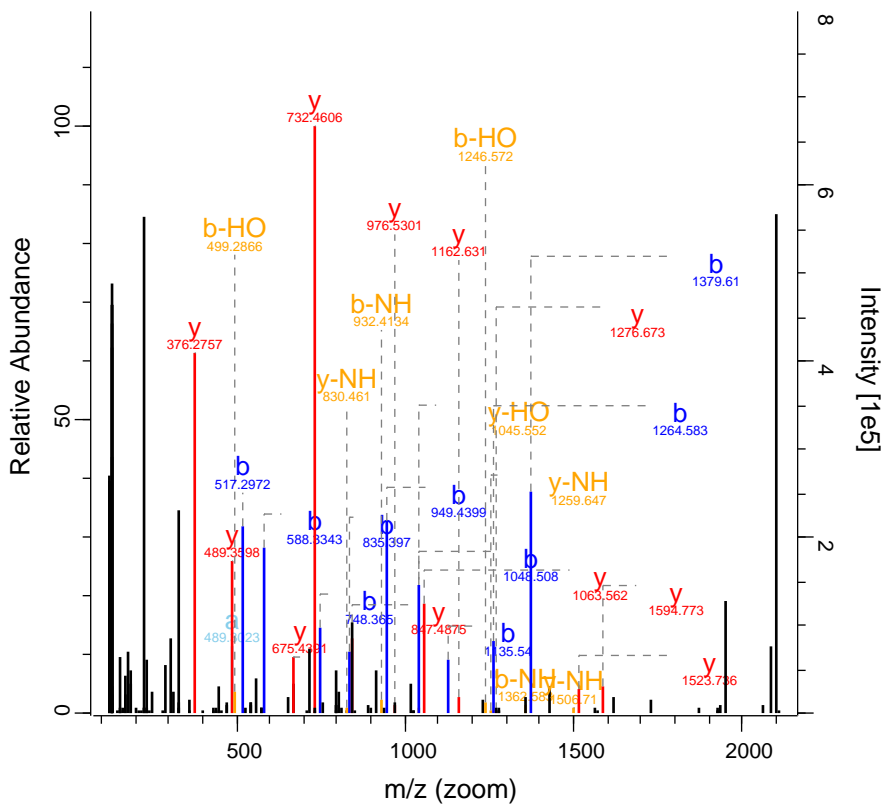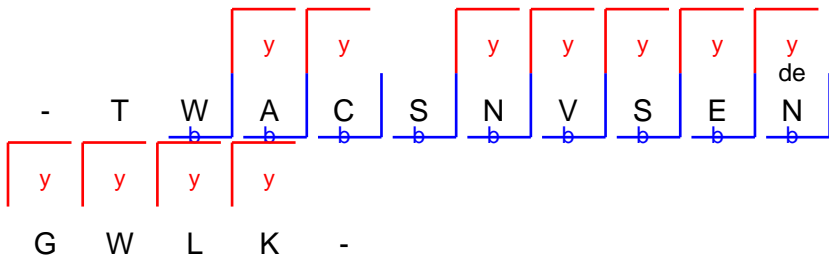





RO-QC-160121\_ZackD\_SS\_Set\_01\_Fraction 31673 FTMS; HC 90.71 537.05 SEPHS2

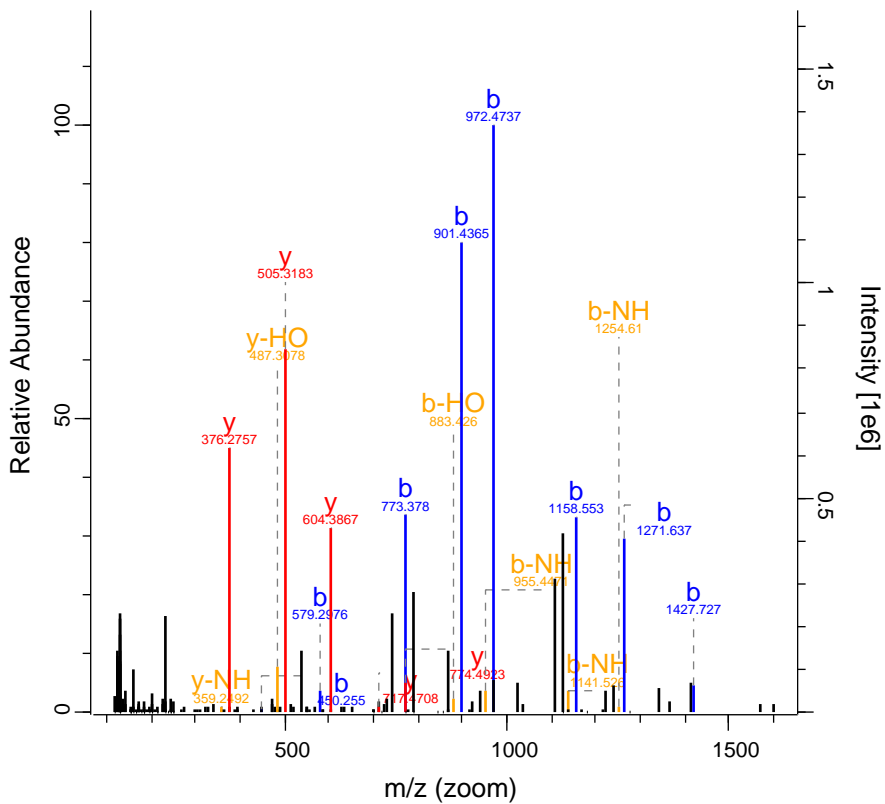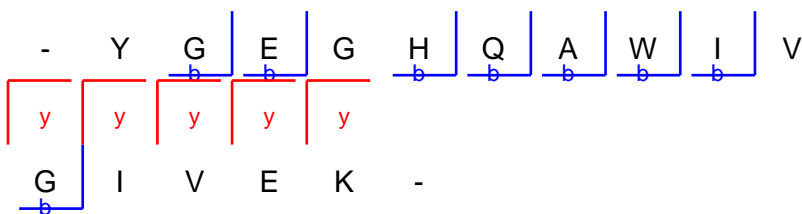

RO-QC-160121\_ZackD\_SS\_Set\_01\_Fraction 31712 FTMS; HC 55.75 715.74 SEPHS2

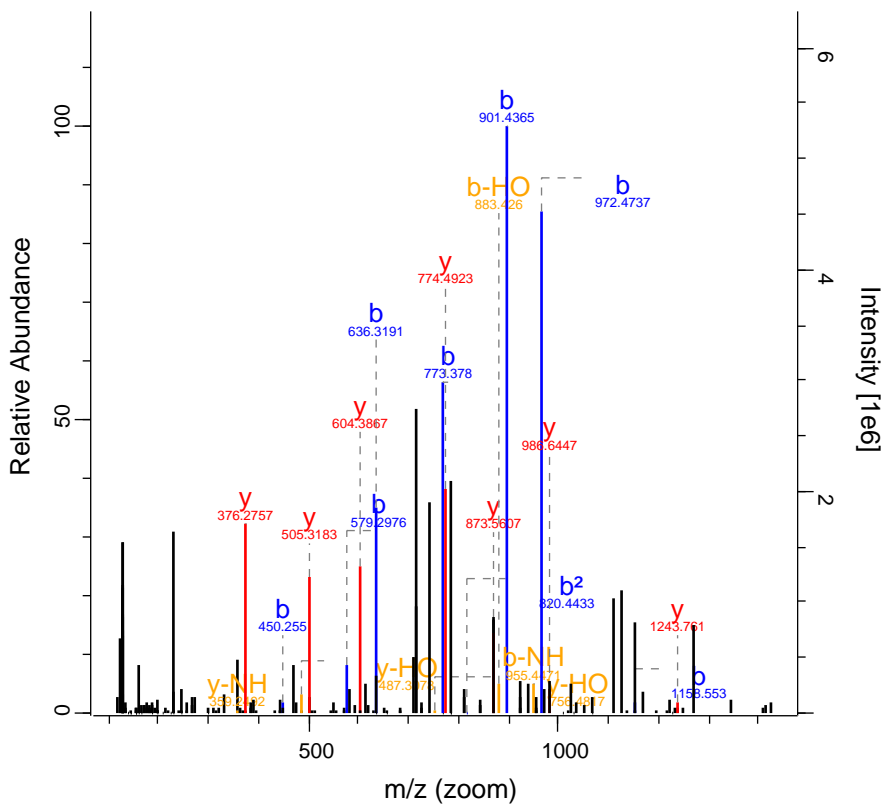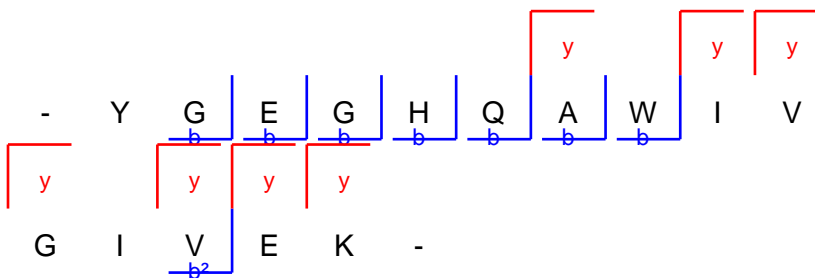



RO-QC-160121\_ZackD\_SS\_Set\_01\_Fraction 33199 FTMS; HC 93.49 648.36 CLK3

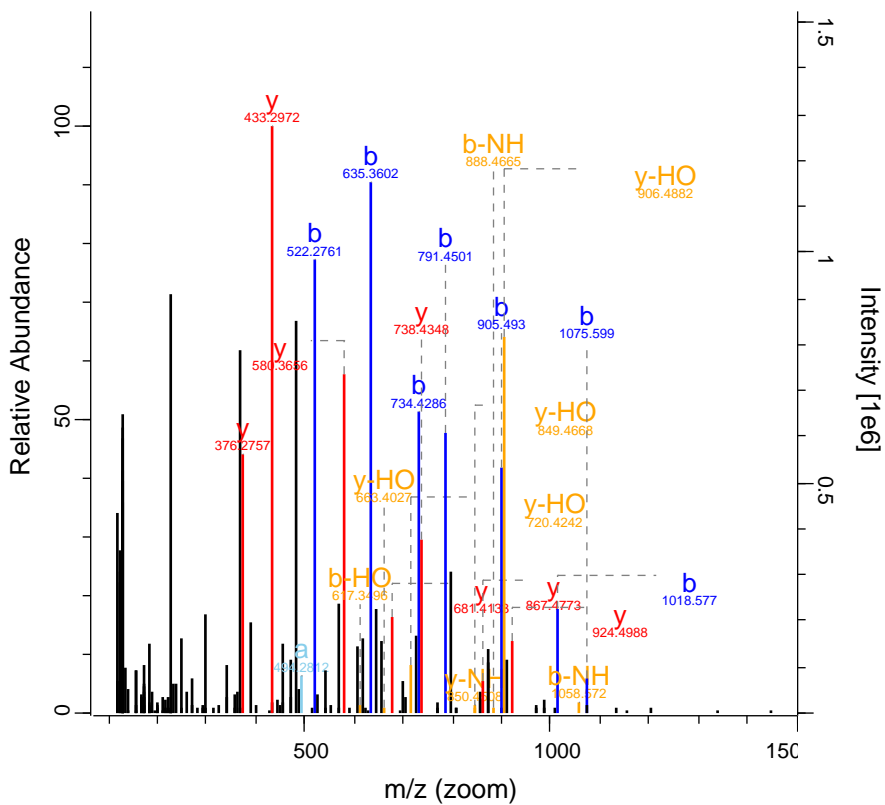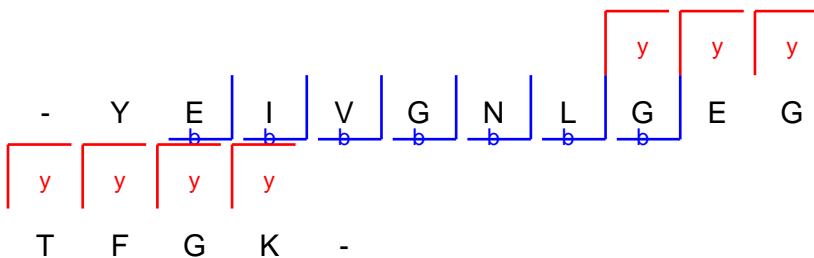



RO-QC-160121\_ZackD\_SS\_Set\_01\_Fraction 33222 FTMS; HC 63.94 543.67 ARL10

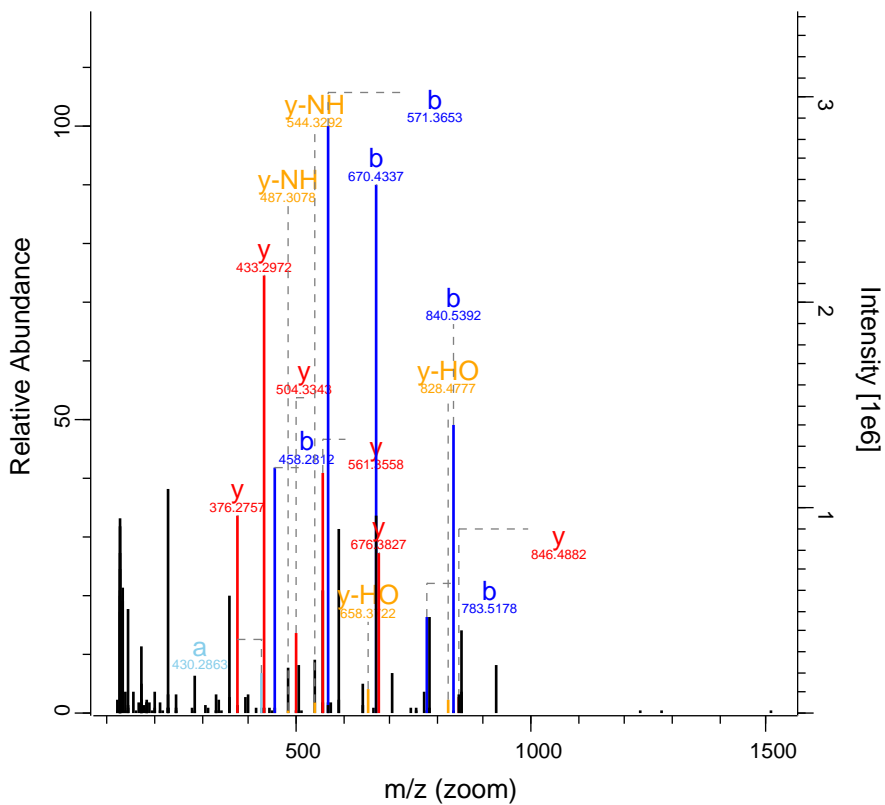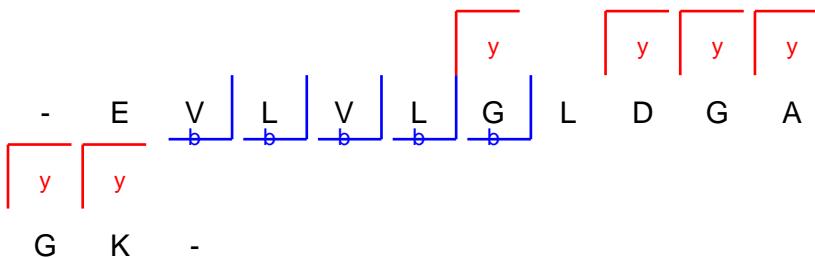

RO-QC-160121\_ZackD\_SS\_Set\_01\_Fraction 33590 FTMS; HC 54.72 651.9 SHISA4

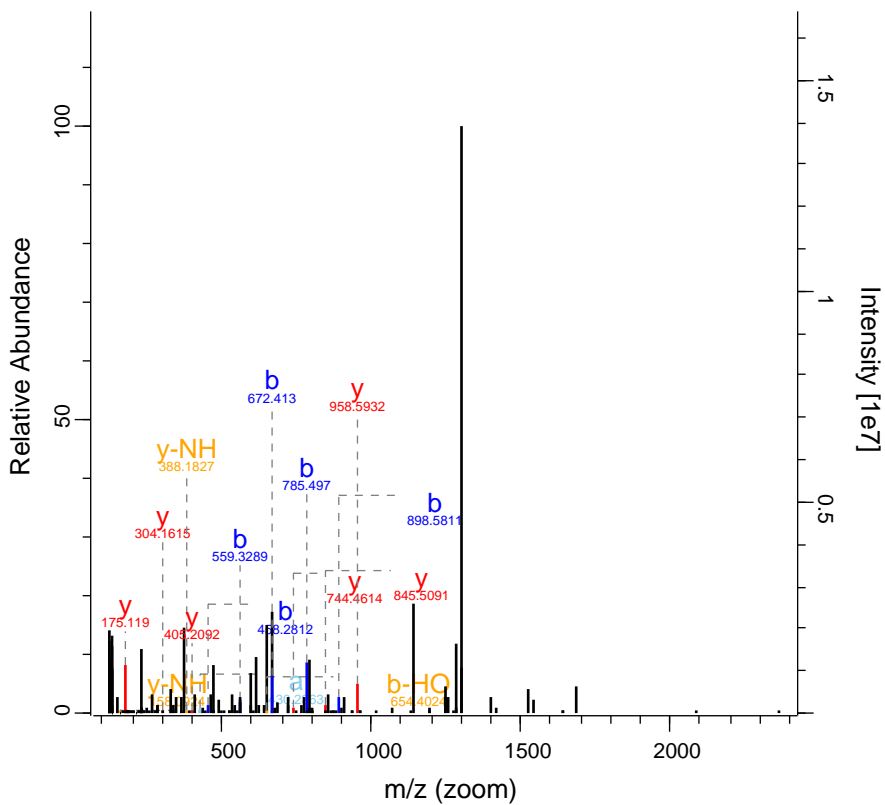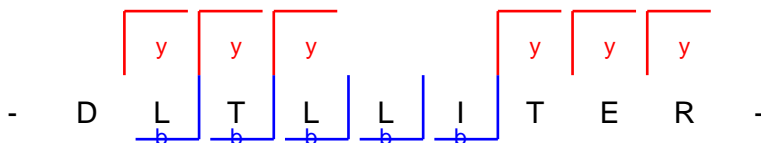

RO-QC-160121\_ZackD\_SS\_Set\_01\_Fraction 34420 FTMS; HC 107.45 883.5 ZG16B

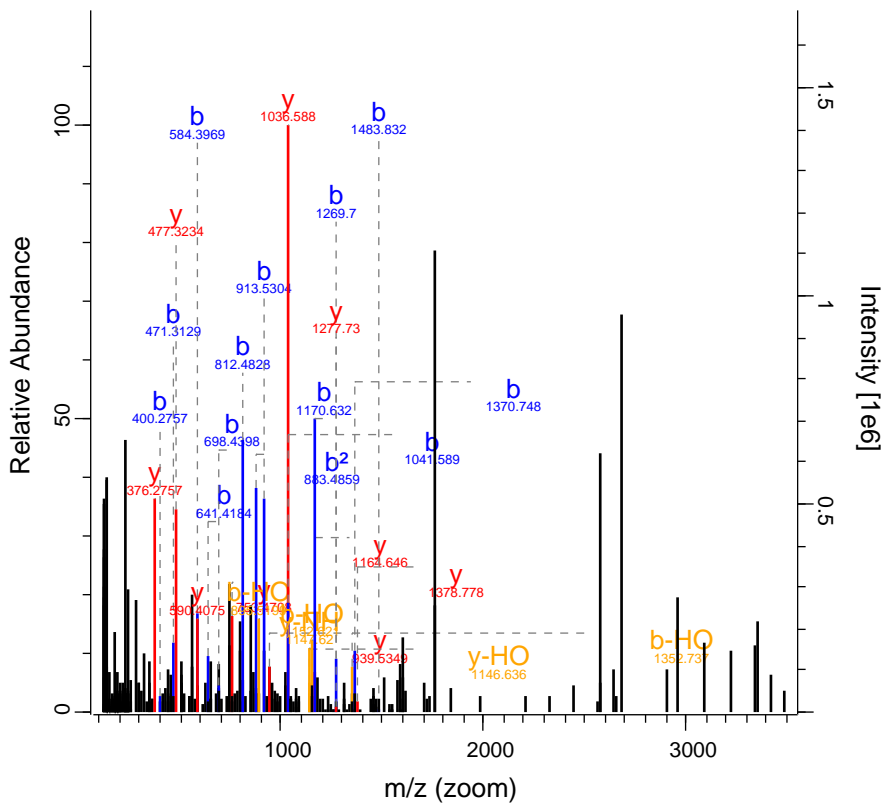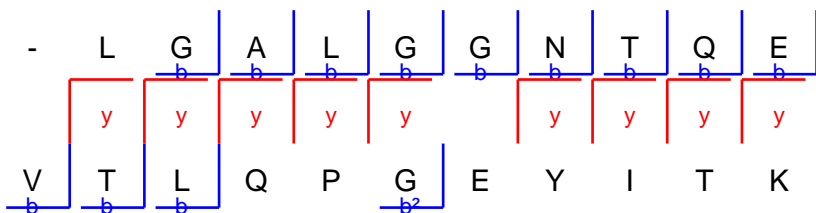

RO-QC-160121\_ZackD\_SS\_Set\_01\_Fraction 36023 FTMS; HC 43.16 837.23 TDRD10

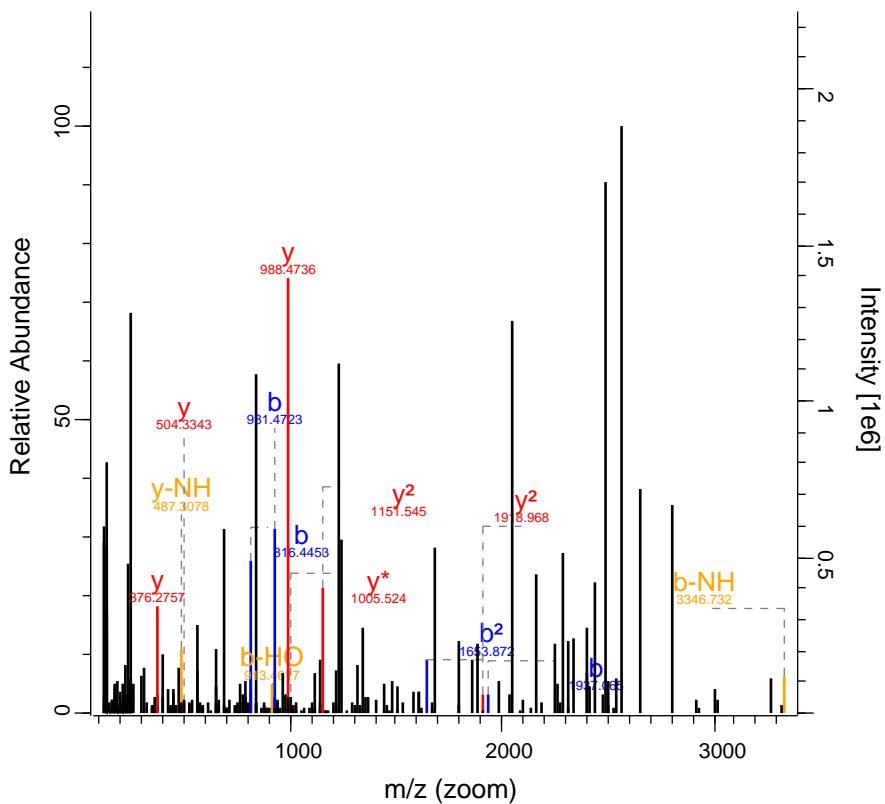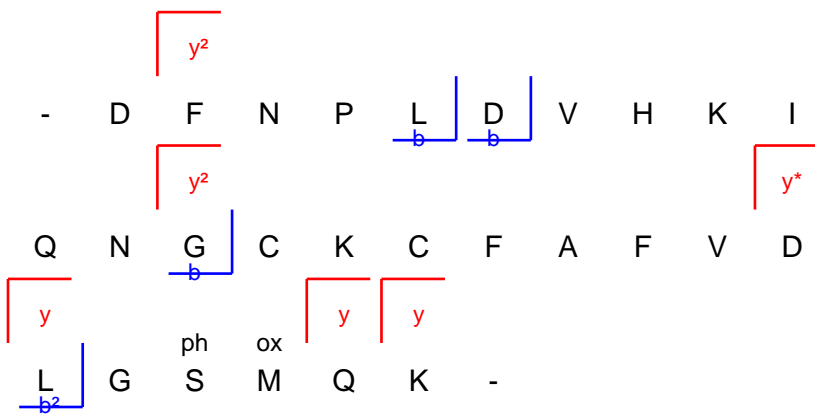

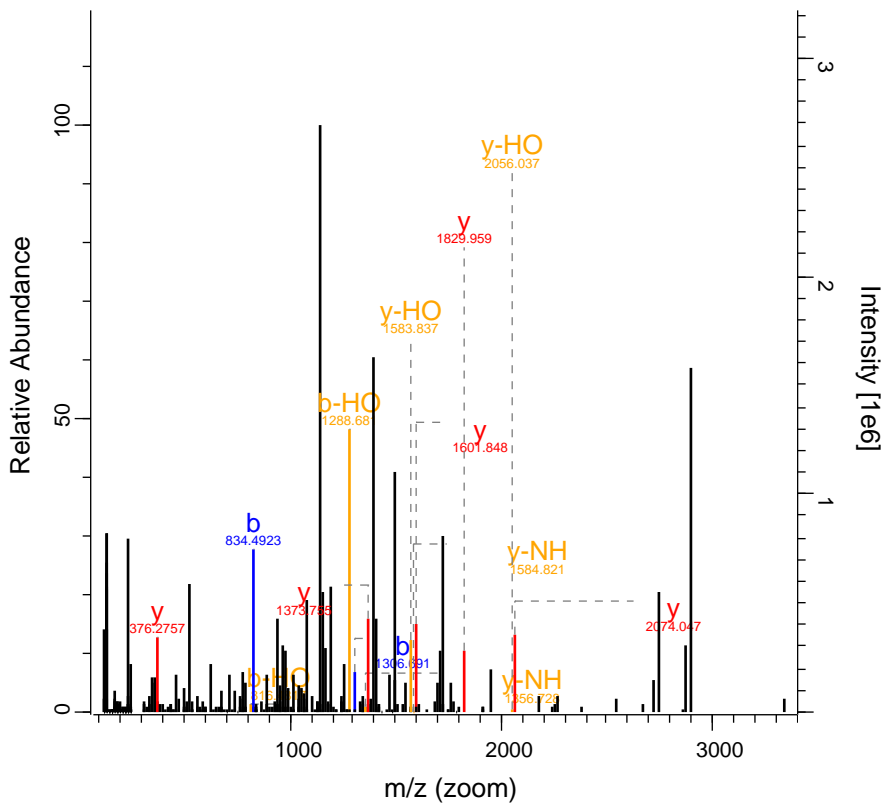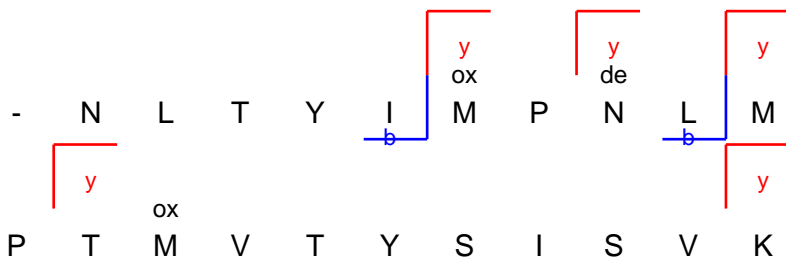

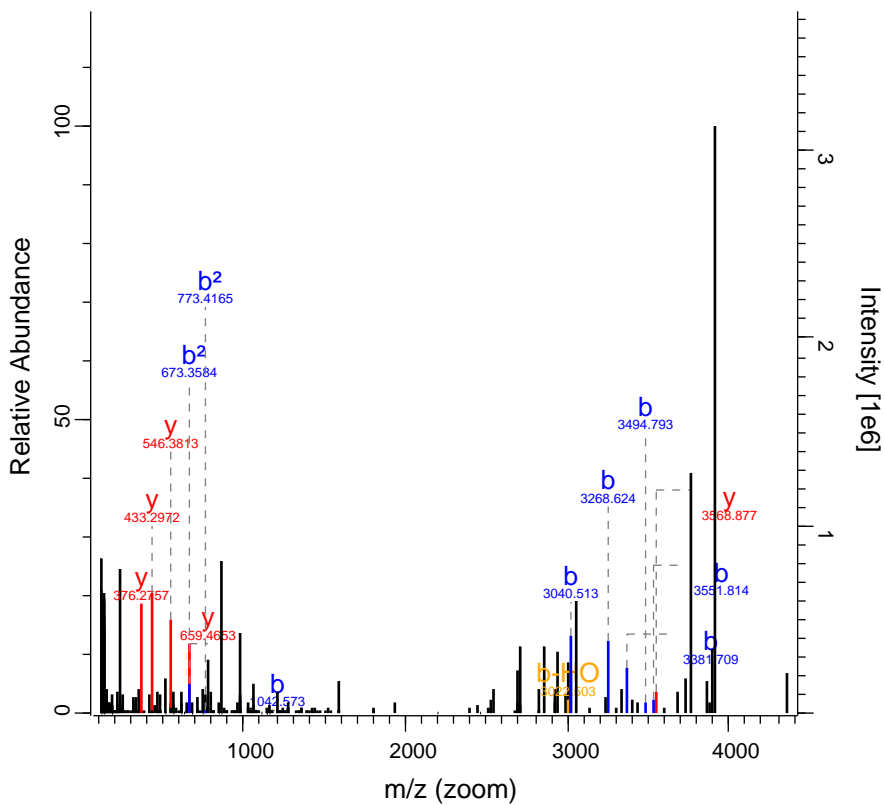

y

- E L E V G E R M R L  
 -b- ox -b<sup>2</sup>

S E I D V V F E Q Y D  
 -b<sup>2</sup>

L S G I D L L G K -  
 -b- y y y y

RO-QC-160121\_ZackD\_SS\_Set\_01\_Fraction 38717 FTMS; HC 79.87 733.07 UBE2J2

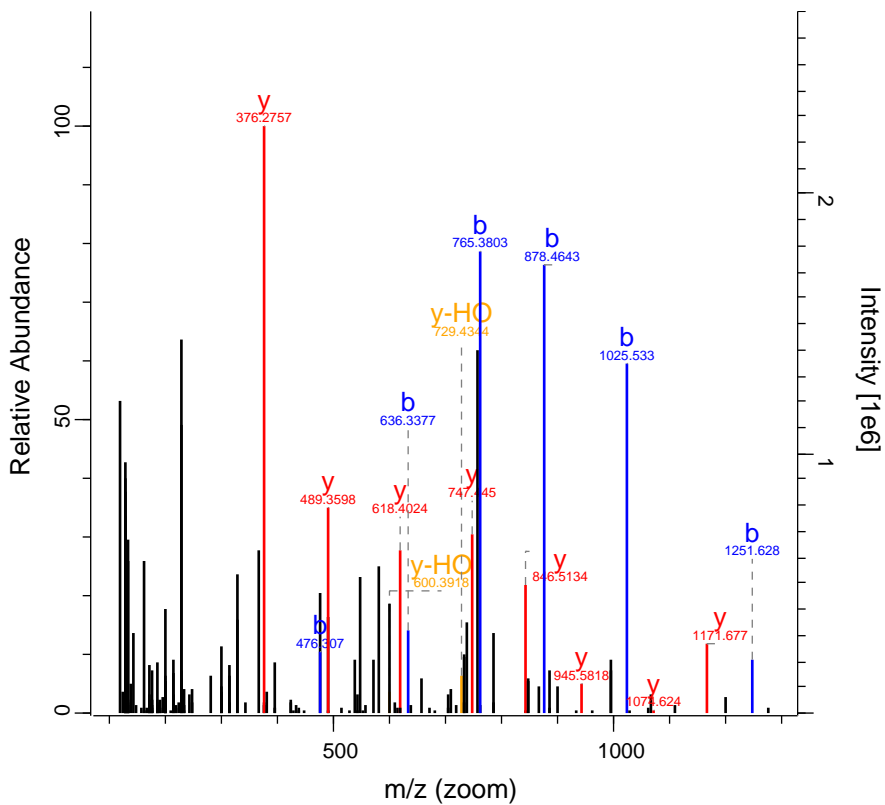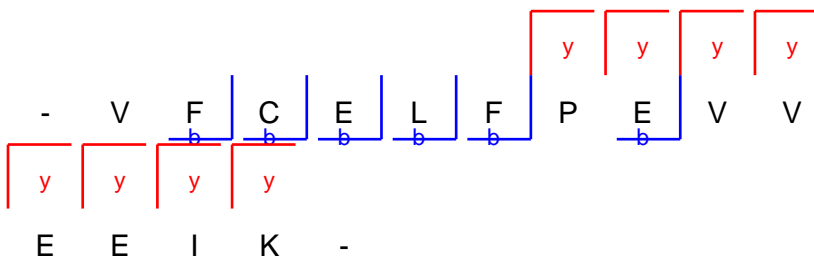

RO-QC-160121\_ZackD\_SS\_Set\_01\_Fraction 39123 FTMS; HC 108.43 993.52 TOMM7

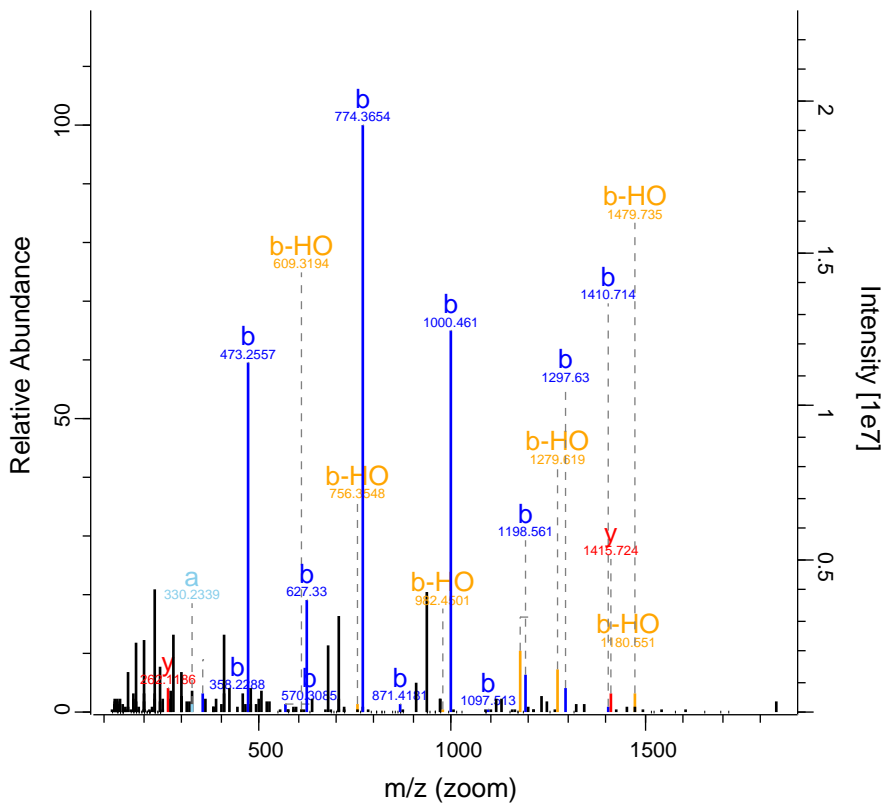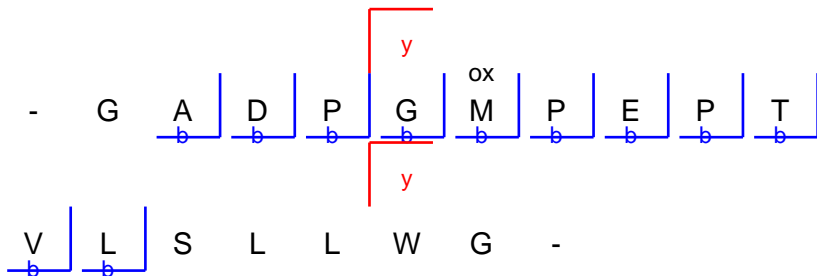



RO-QC-160121\_ZackD\_SS\_Set\_01\_Fraction 39234 FTMS; HC 82.42 985.52 TOMM7

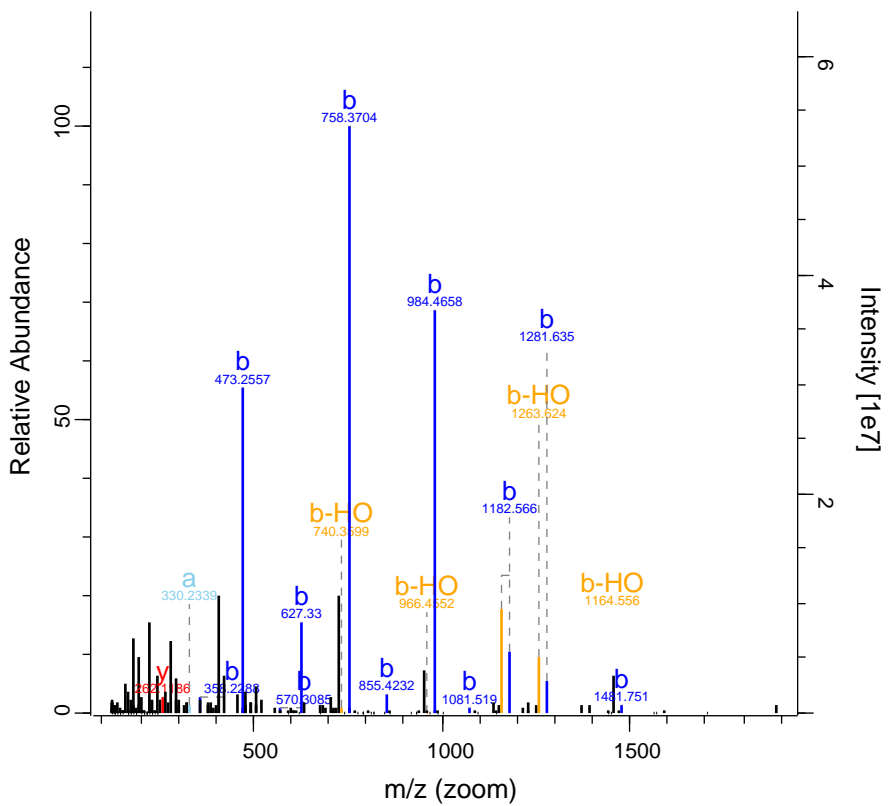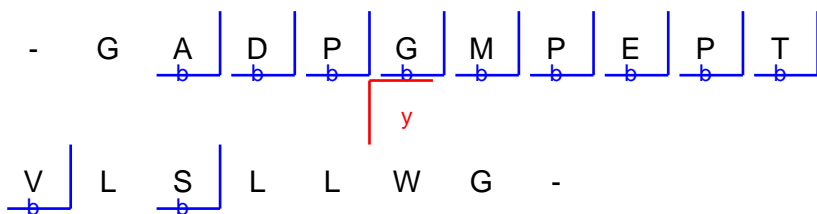

RO-QC-160121\_ZackD\_SS\_Set\_01\_Fraction 39250 FTMS; HC 38.38 657.35 TOMM7

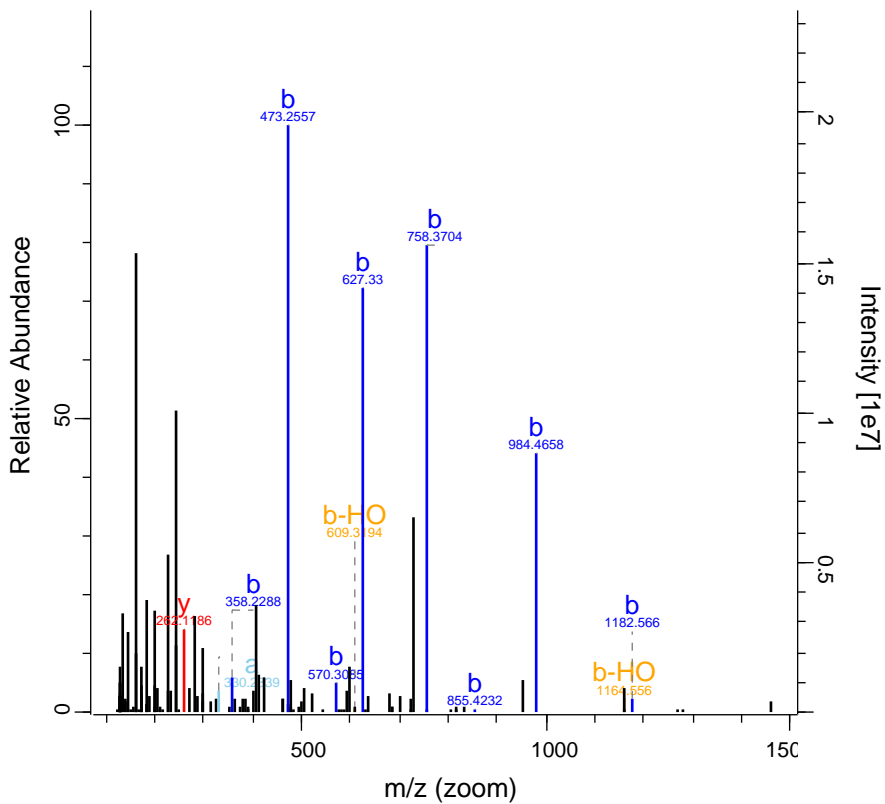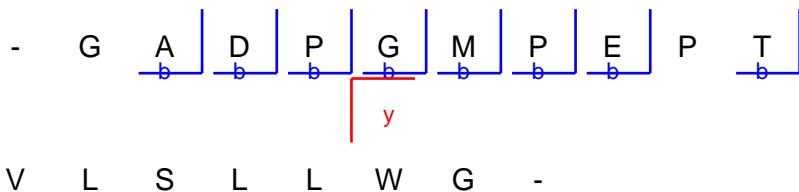

Raw File

Scan Method Score m/z

RO-QC-160121\_ZackD\_SS\_Set\_01\_Fraction\_12

4717 FTMS; HCD 84.66 470.02

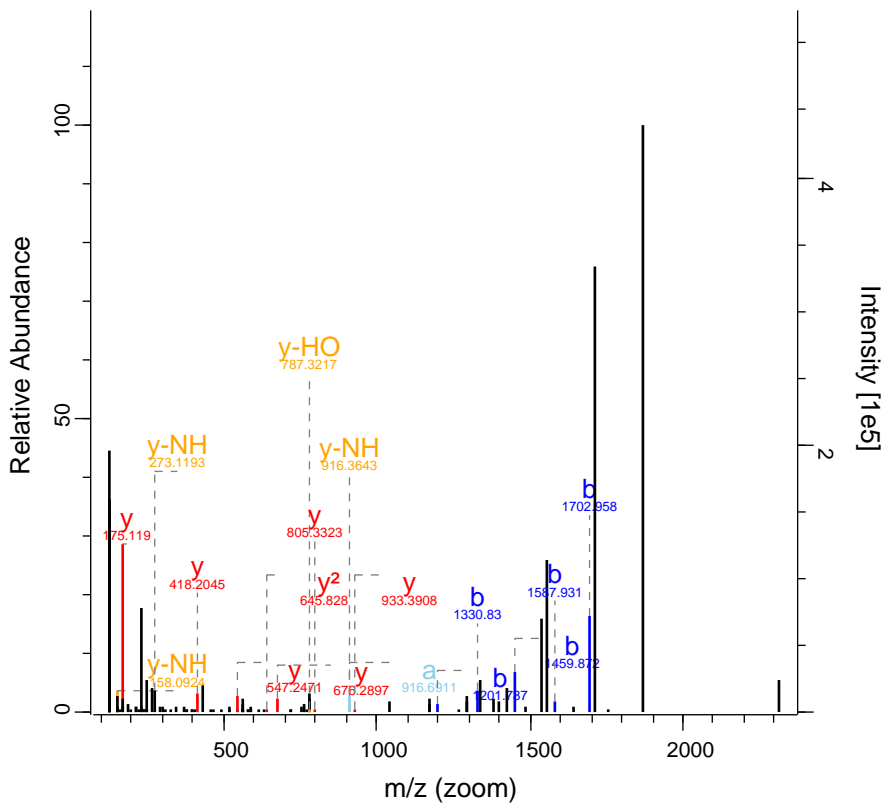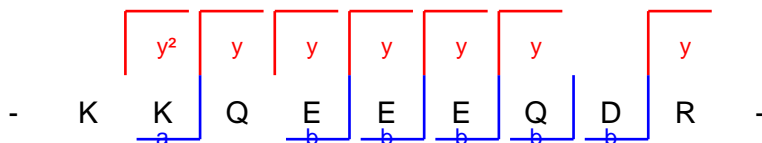

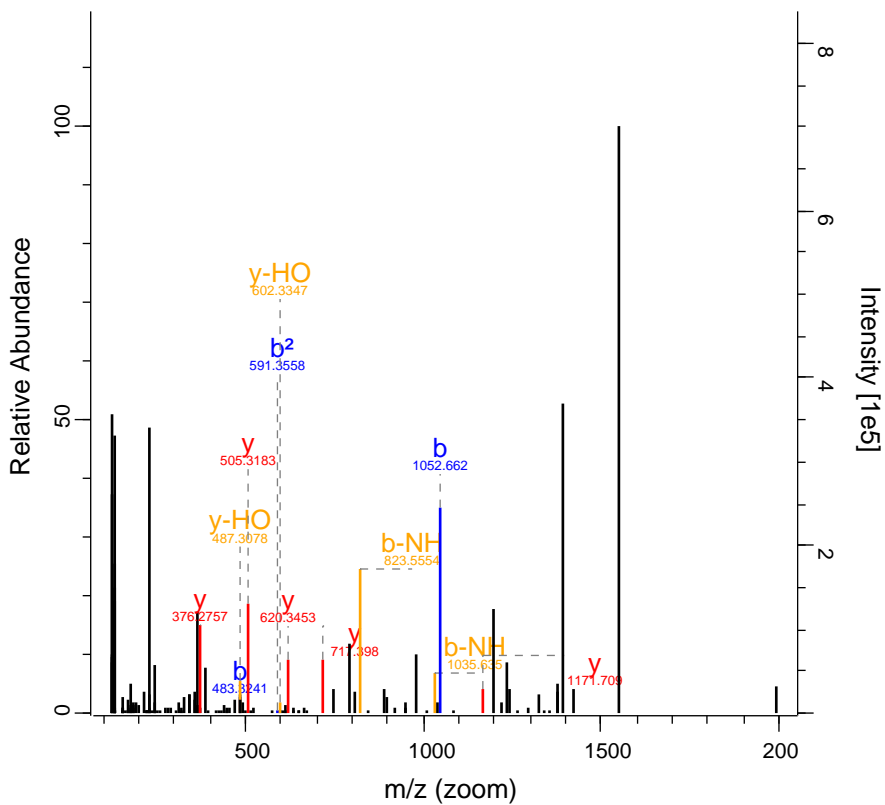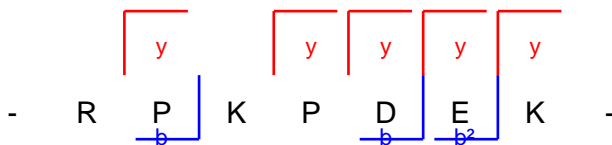

RO-QC-160121\_ZackD\_SS\_Set\_01\_Fraction\_5494 FTMS; HCl; 91.07 397 ADAM28

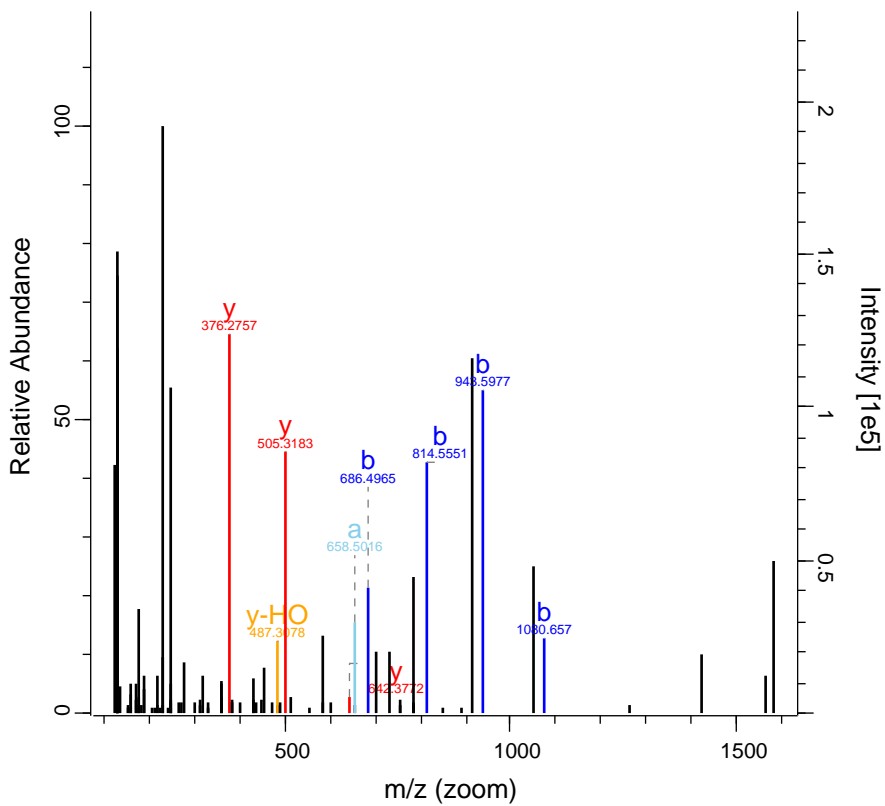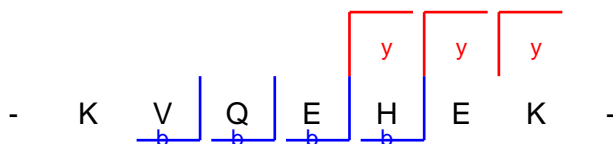

RO-QC-160121\_ZackD\_SS\_Set\_01\_Fraction 5544 FTMS; HC 66.57 683.83 LMBR1

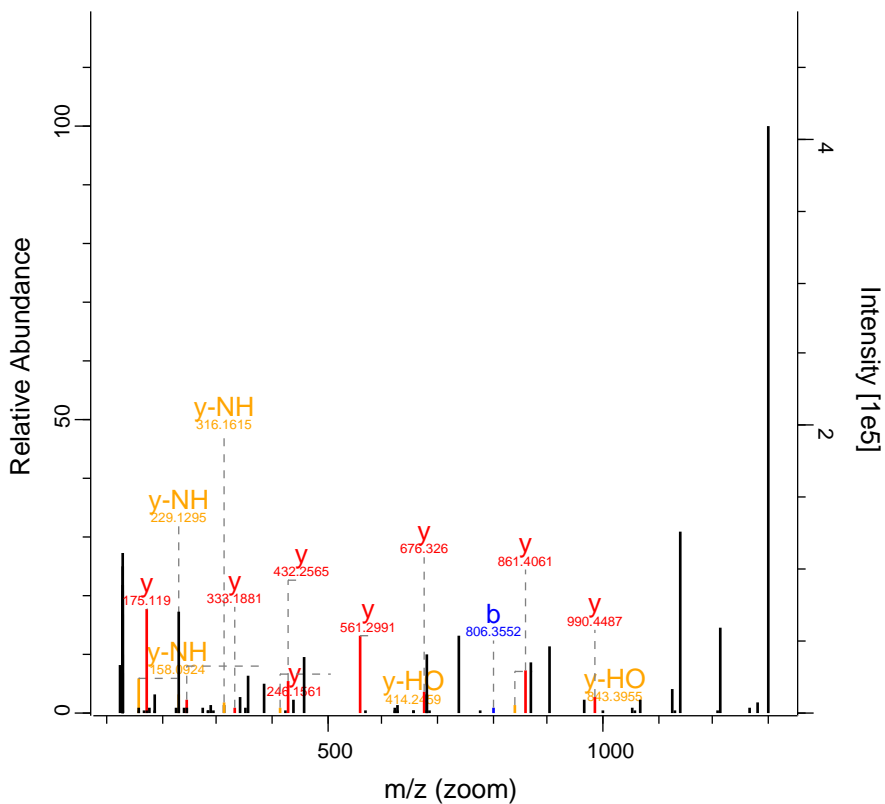

m/z (zoom)

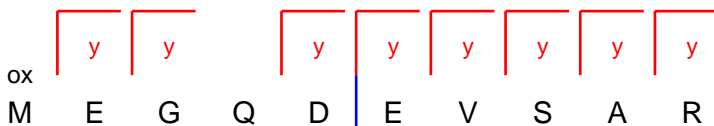

RO-QC-160121\_ZackD\_SS\_Set\_01\_Fraction 5925 FTMS; HC 117.86 787.88 PCSK1N

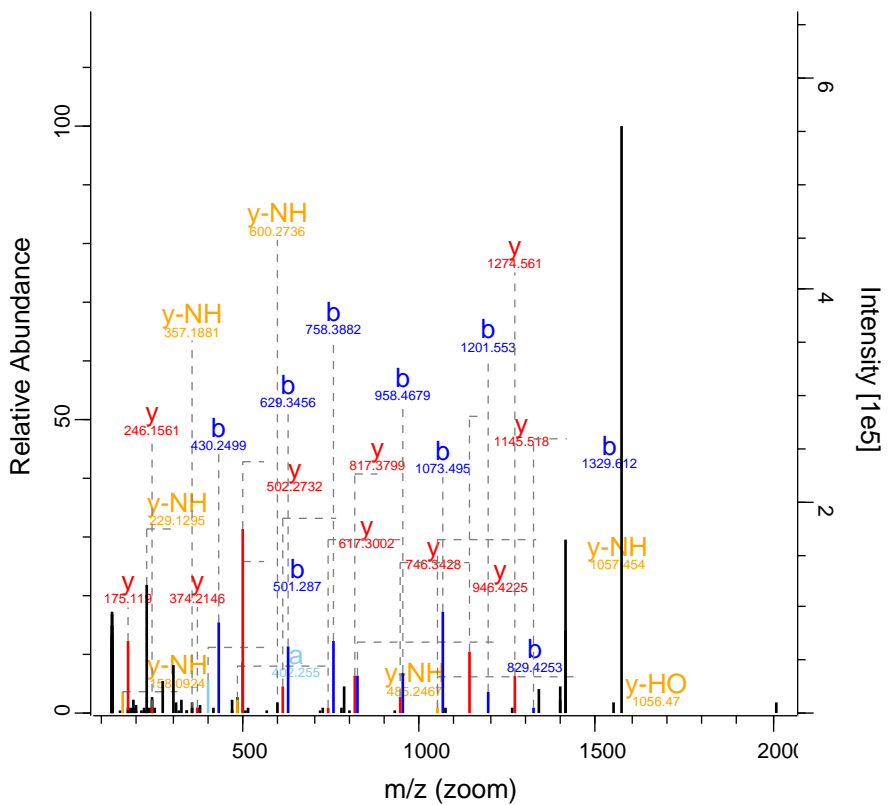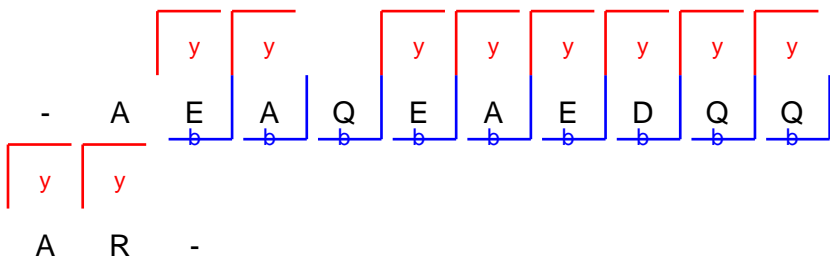

RO-QC-160121\_ZackD\_SS\_Set\_01\_Fraction 5945 FTMS; HC 122.33 525.59 PCSK1N

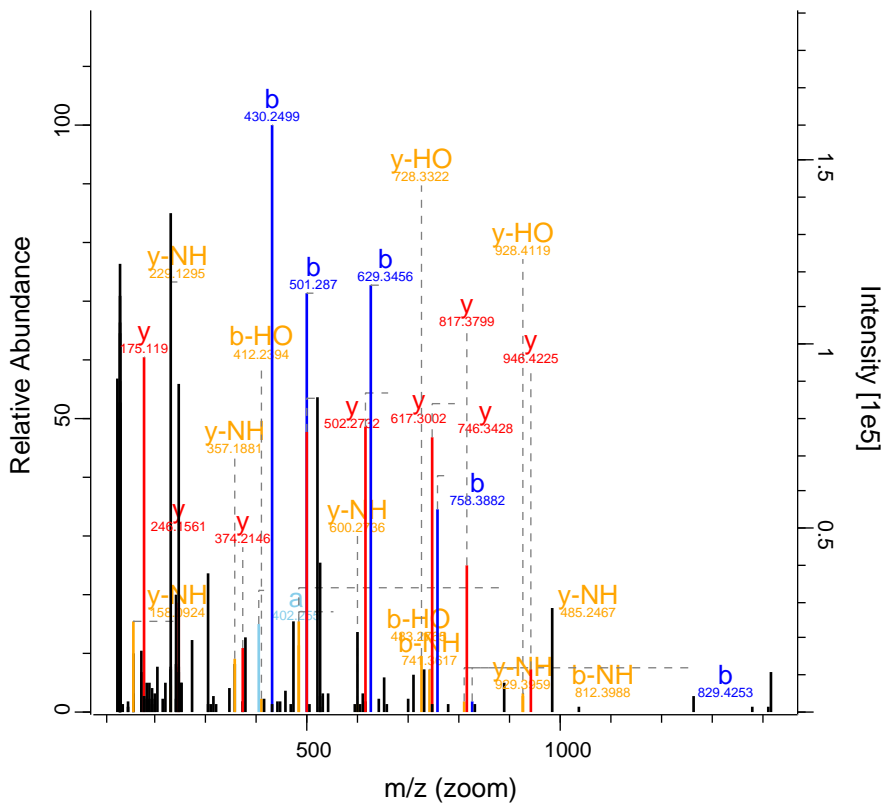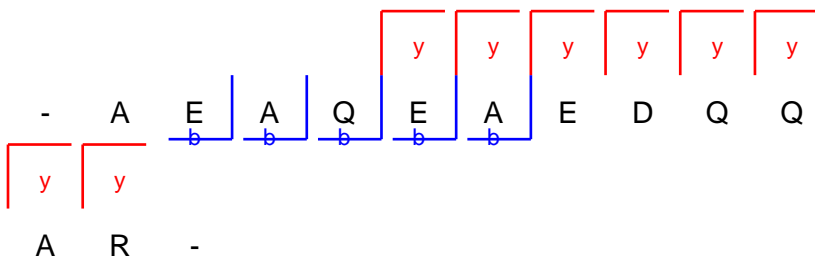



RO-QC-160121\_ZackD\_SS\_Set\_01\_Fraction 6087 FTMS; HC 82.29 771.35 ABCA7

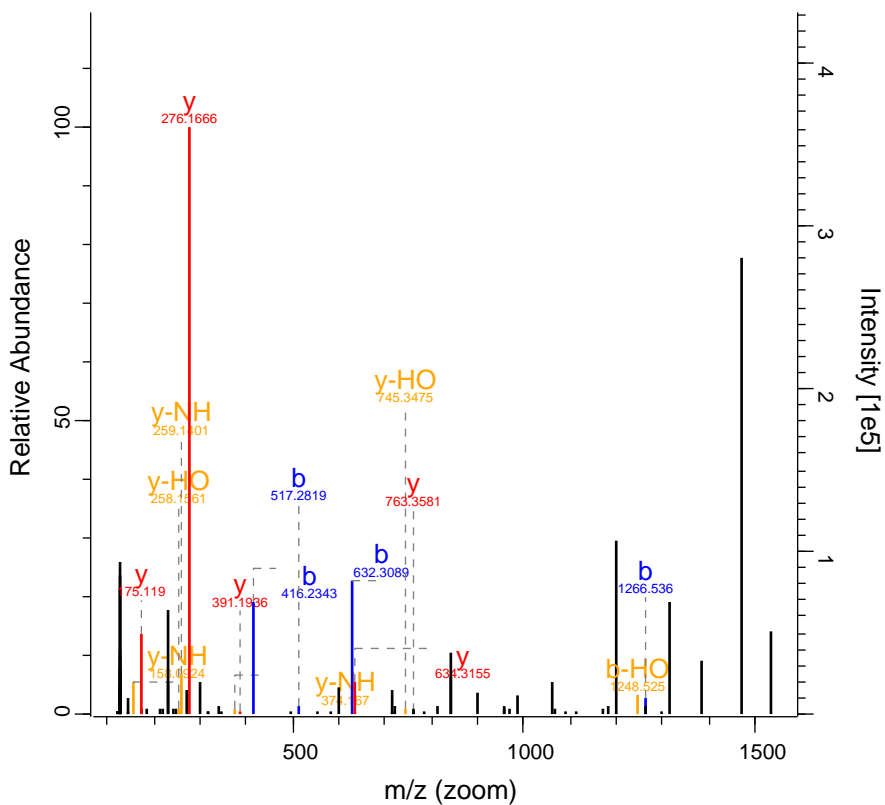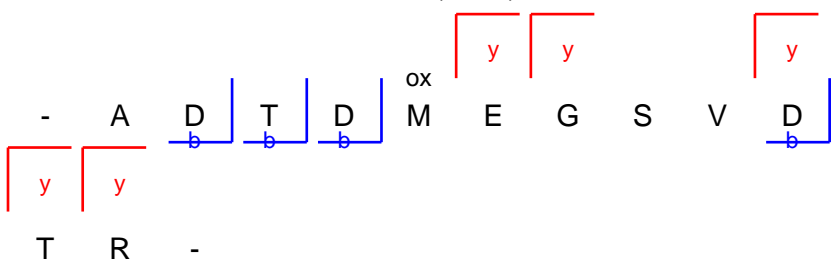

RO-QC-160121\_ZackD\_SS\_Set\_01\_Fraction 6195 FTMS; HC 60.91 972.99 CDCA7

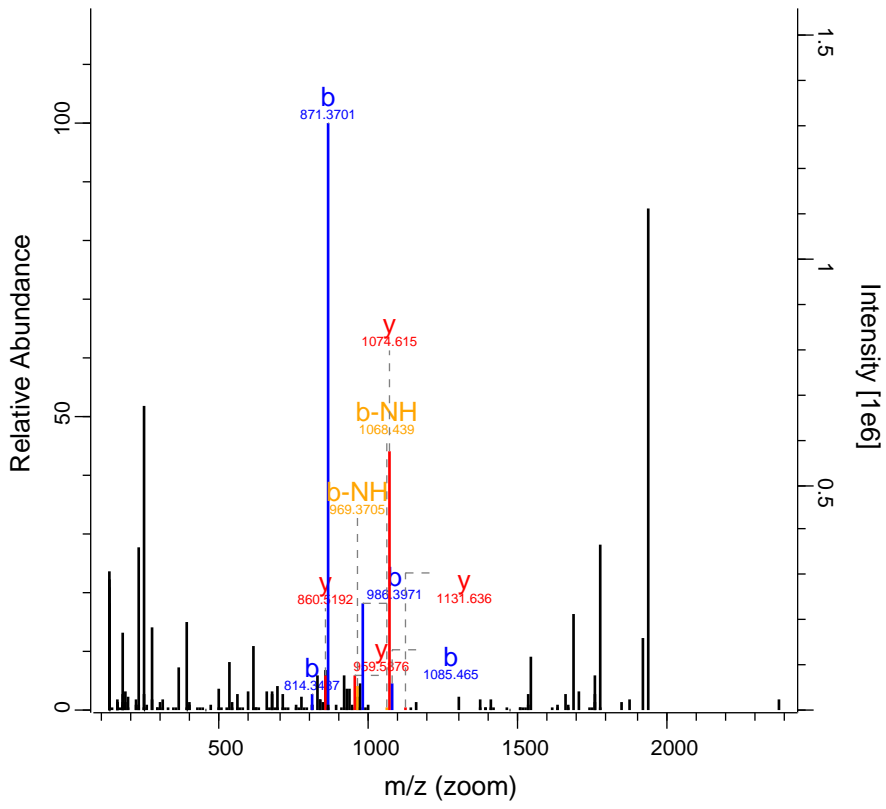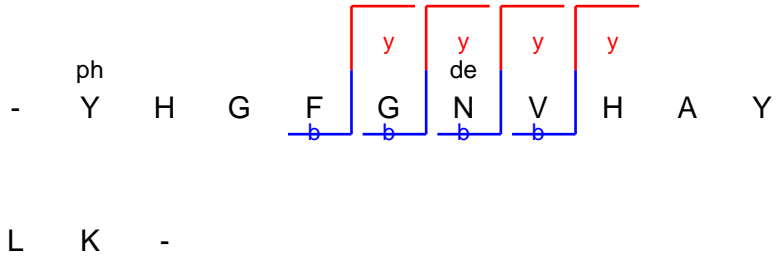

RO-QC-160121\_ZackD\_SS\_Set\_01\_Fraction 6449 FTMS; HC 49.85 431.51 PIGF

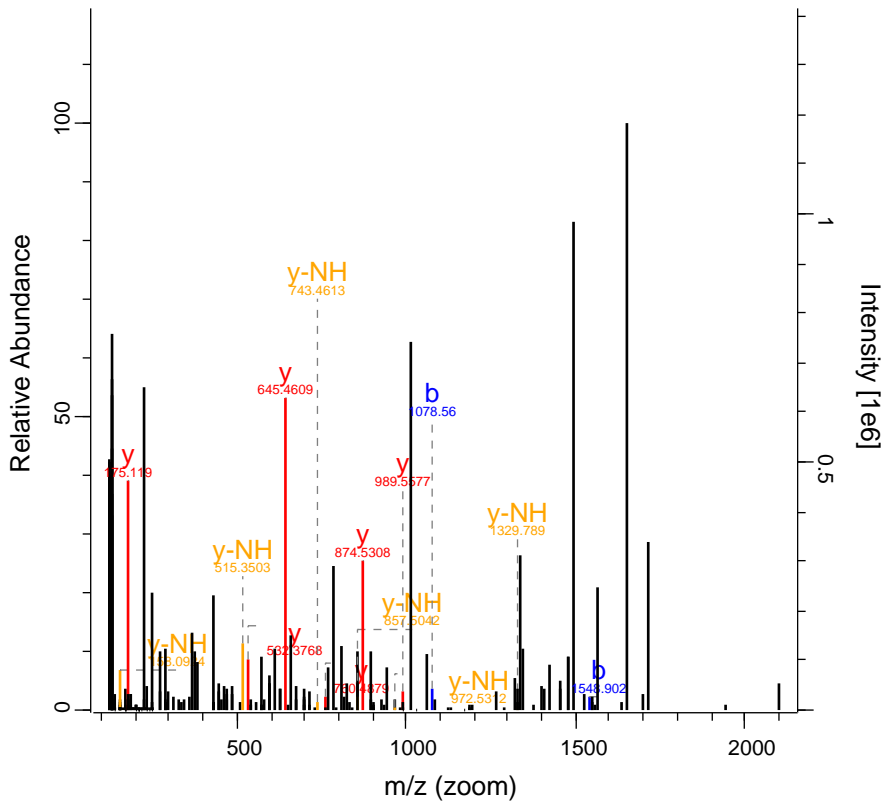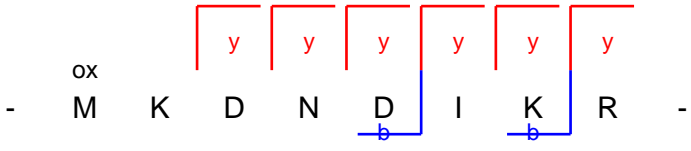

RO-QC-160121\_ZackD\_SS\_Set\_01\_Fraction 6877 FTMS; HC 126.07 679.89 LENG9

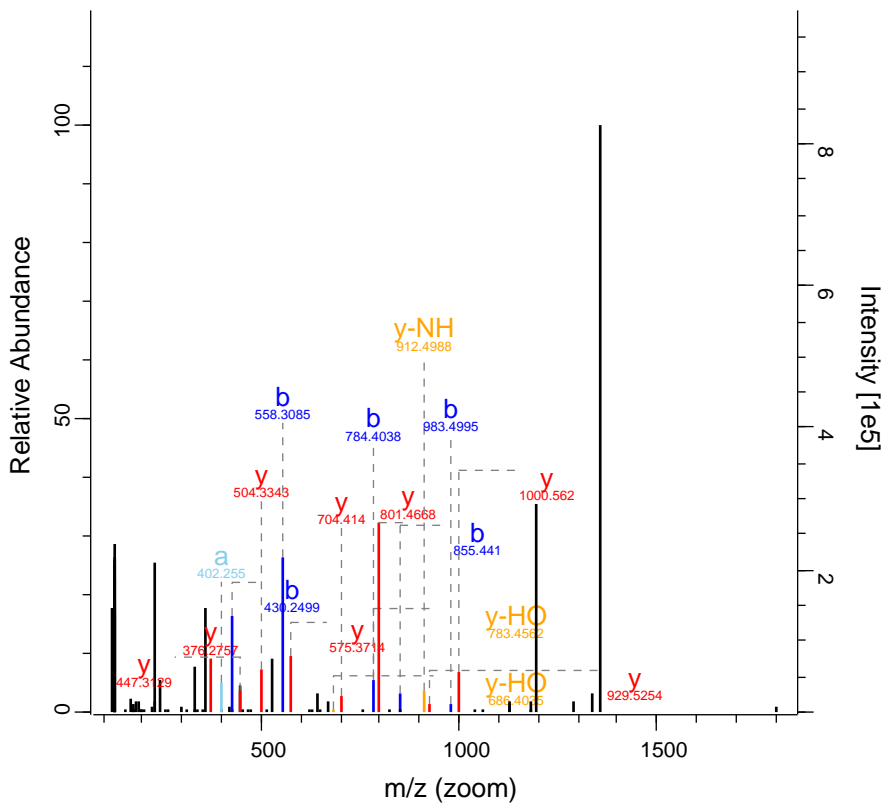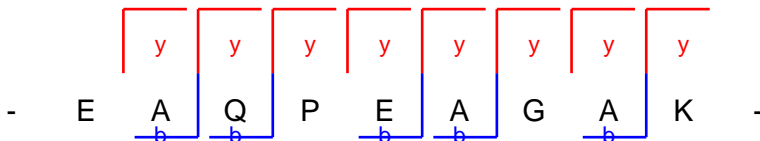



RO-QC-160121\_ZackD\_SS\_Set\_01\_Fraction 7742 FTMS; HC 117.72 593.32 C17orf100

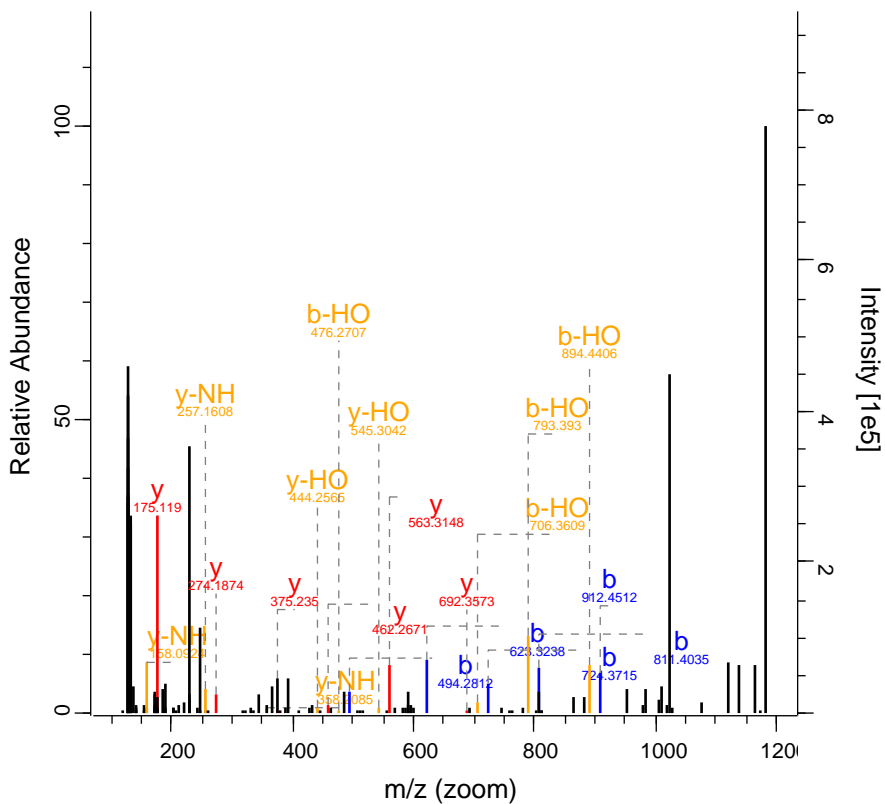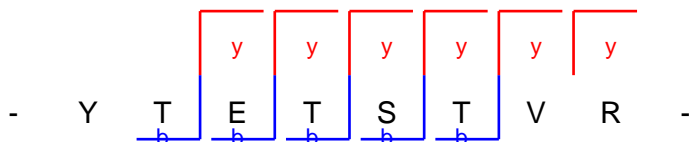

RO-QC-160121\_ZackD\_SS\_Set\_01\_Fraction 7964 FTMS; HC 58.68 433.75 KCNA10

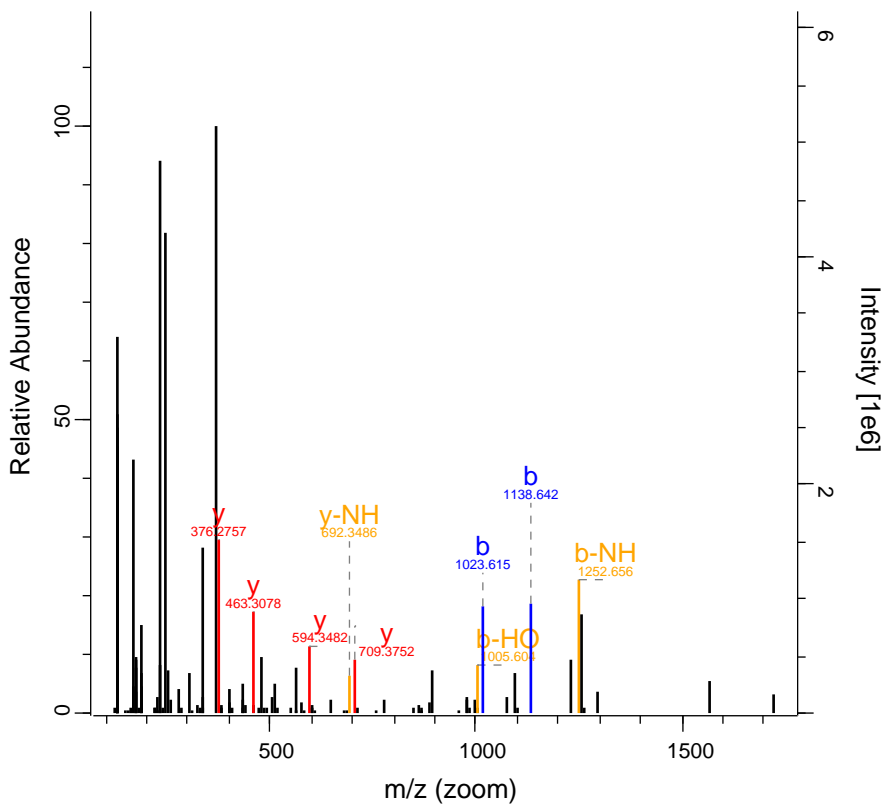

K -

RO-QC-160121\_ZackD\_SS\_Set\_01\_Fraction 8283 FTMS; HC 45.88 433.75 KCNA10

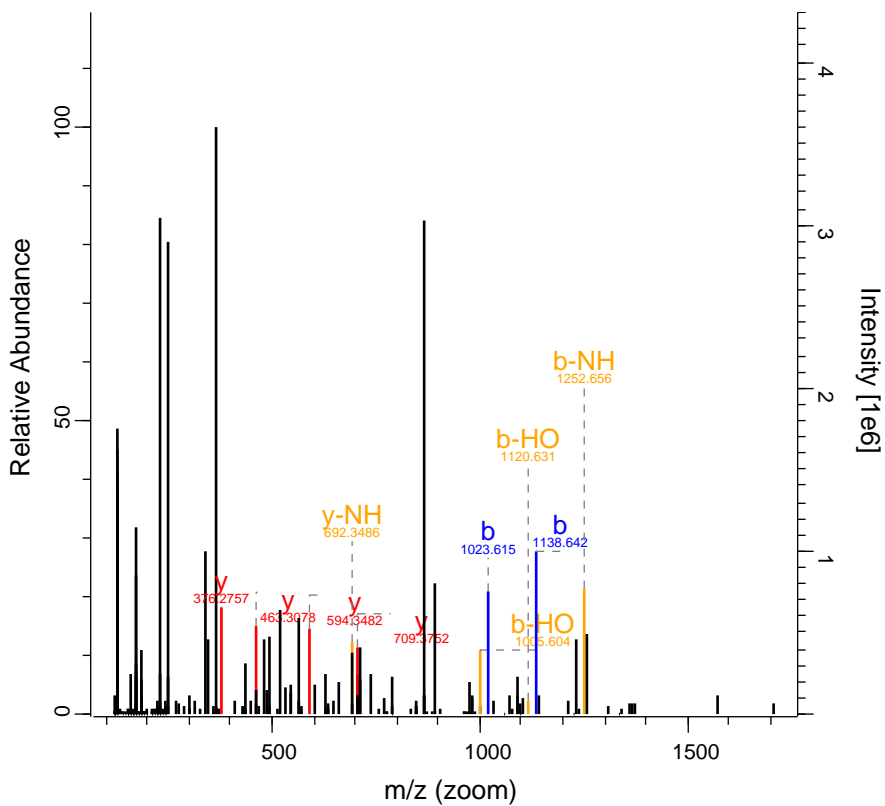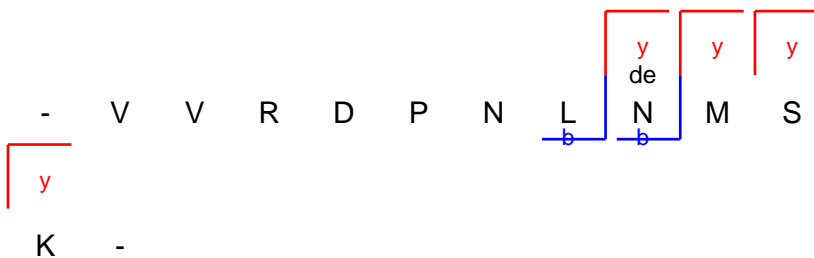



RO-QC-160121\_ZackD\_SS\_Set\_01\_Fraction 8287 FTMS; HC 51.69 518.79 RNF187

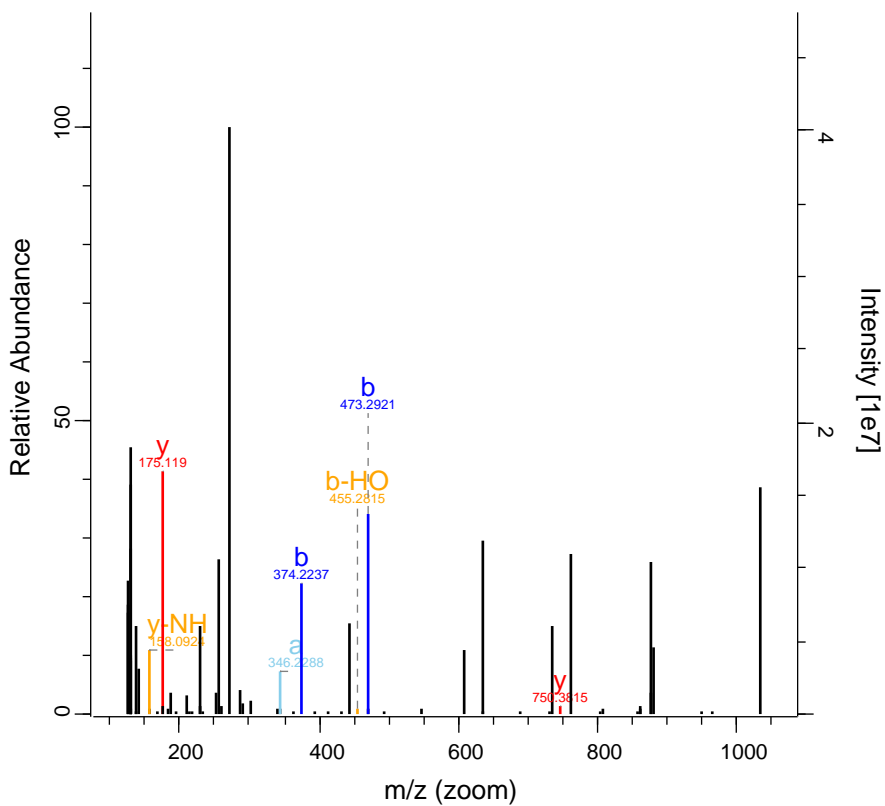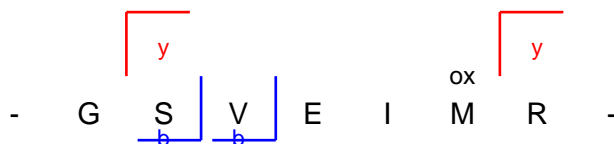

RO-QC-160121\_ZackD\_SS\_Set\_01\_Fraction 8405 FTMS; HC 149.94 631.84 MBTPS2

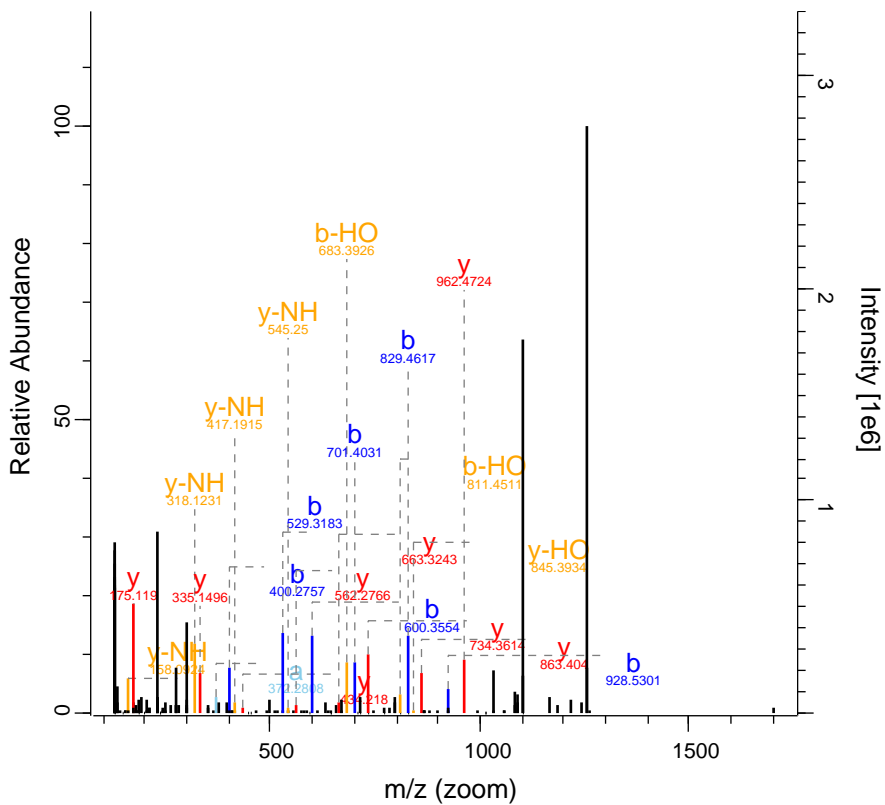

RO-QC-160121\_ZackD\_SS\_Set\_01\_Fraction 8799 FTMS; HC 42.79 464.66 C6orf10

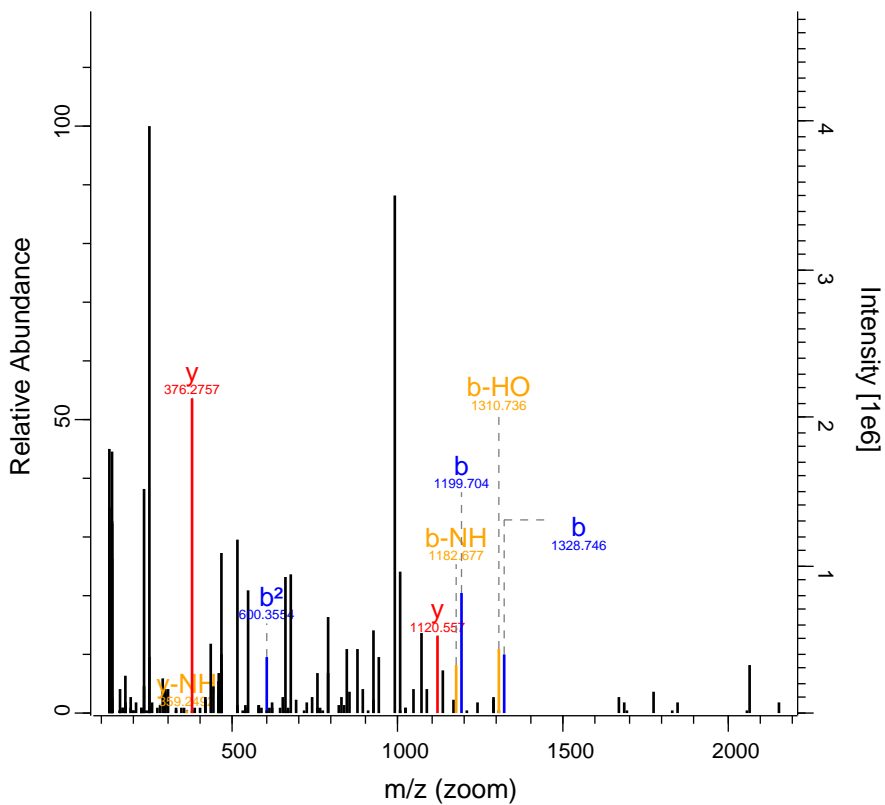

- T E A D V P K E Q E  
 de  
 V Q E K -

Fragmentation paths are indicated by red and blue brackets:

- Red brackets: y (376.2757) and y (1120.557)
- Blue brackets: b (1328.746) and b (1328.746)

RO-QC-160121\_ZackD\_SS\_Set\_01\_Fraction 9093 FTMS; HC 125.83 630.34 LIPT2

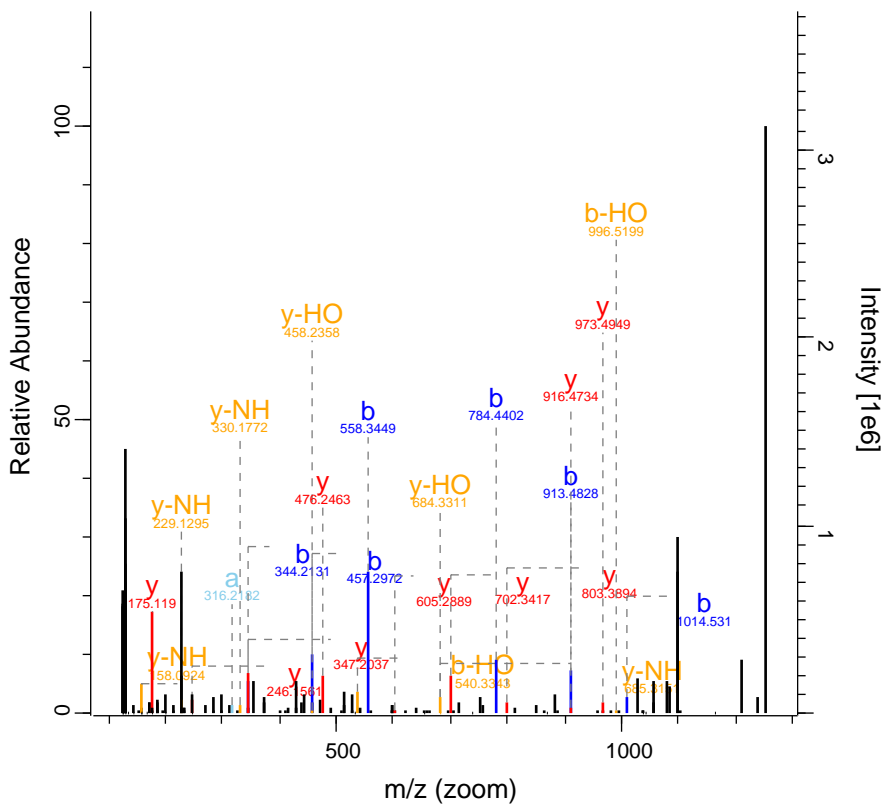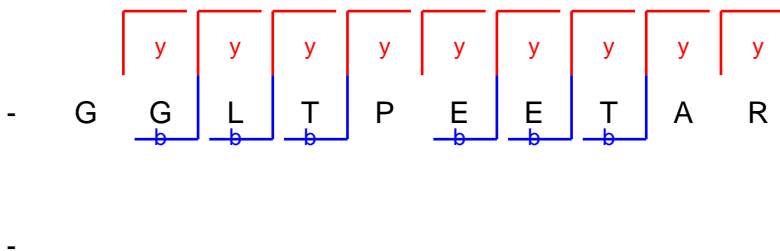

Raw File

Scan Method Score m/z

RO-QC-160121\_ZackD\_SS\_Set\_01\_Fraction\_12

10371 FTMS; HCD 46.35 562.33

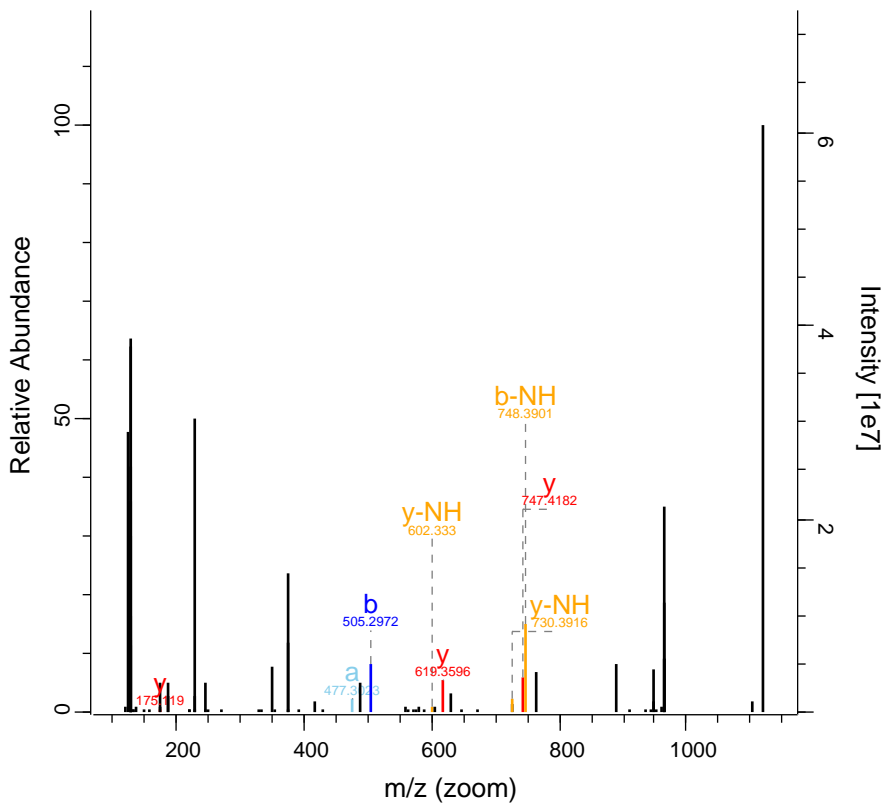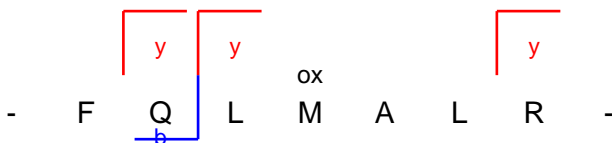

RO-QC-160121\_ZackD\_SS\_Set\_01\_Fraction 10796 FTMS; HC 158.38 733.9 PIGB

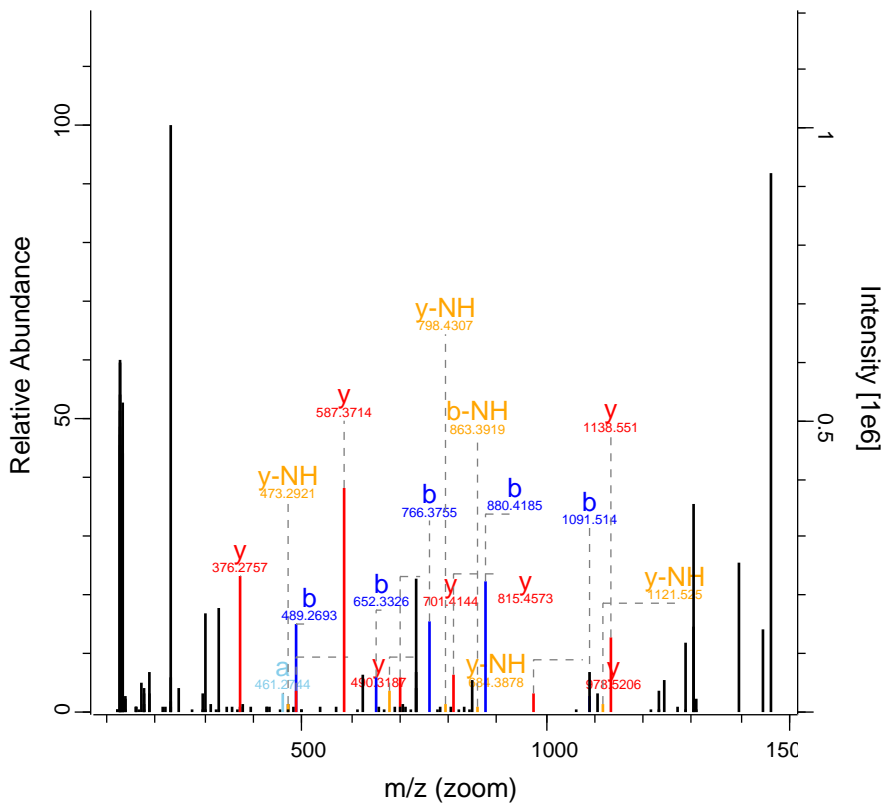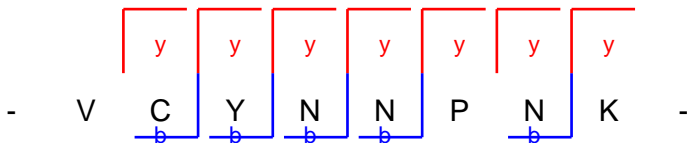

RO-QC-160121\_ZackD\_SS\_Set\_01\_Fraction1 11699 FTMS; HC 112.17 637.42 NOVA2

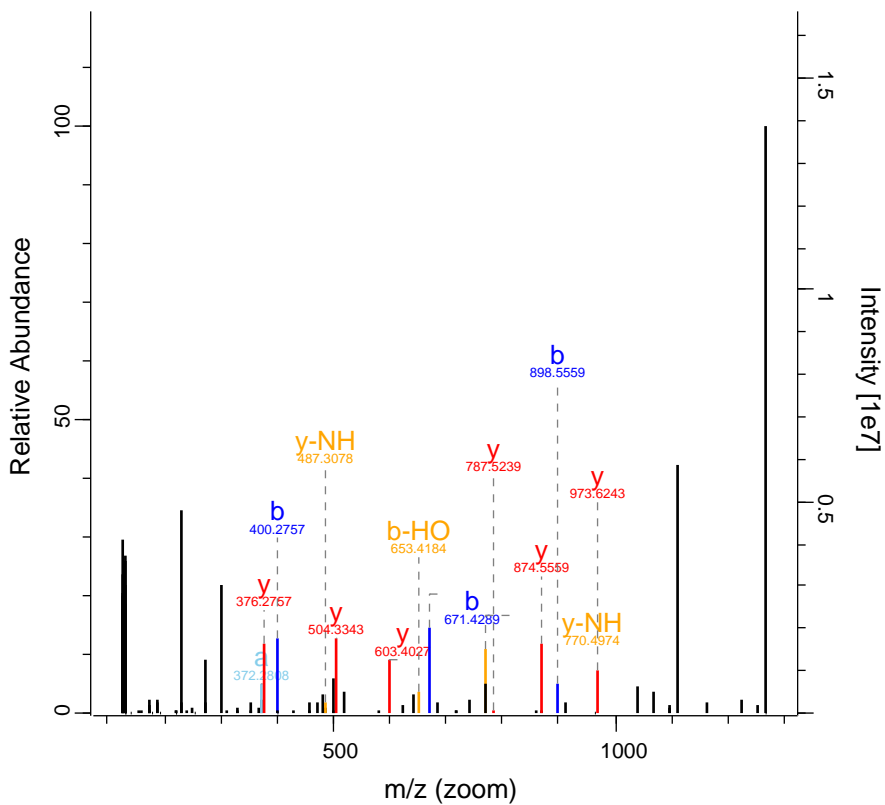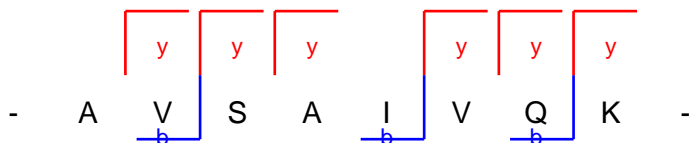

RO-QC-160121\_ZackD\_SS\_Set\_01\_Fraction1 11758 FTMS; HC 58.92 425.28 NOVA2

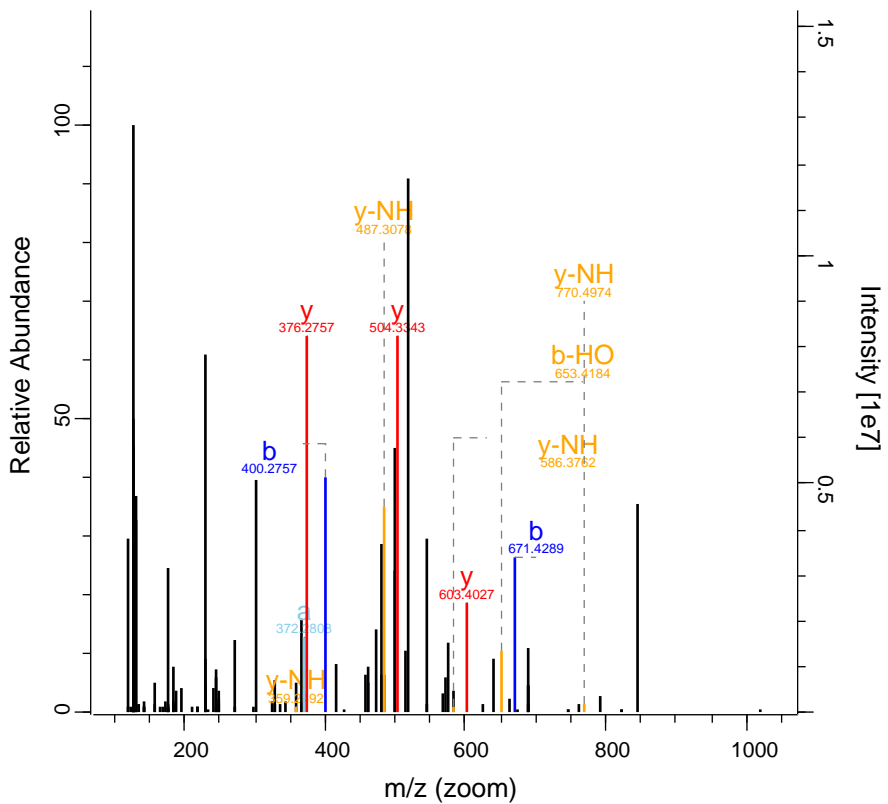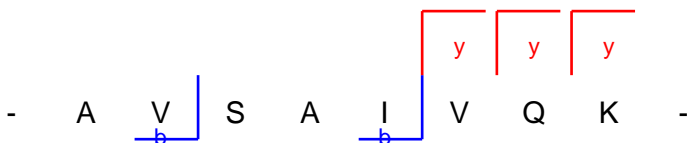



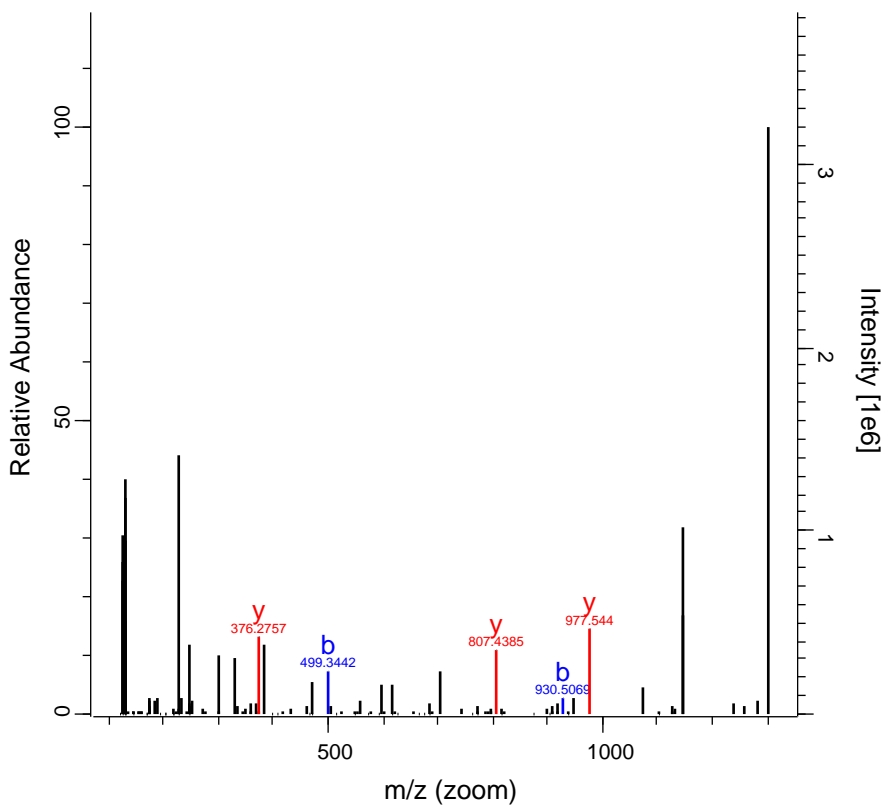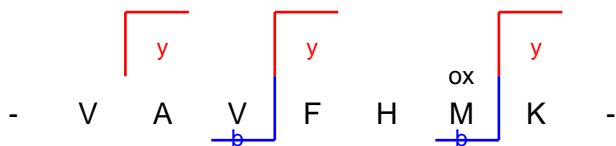

RO-QC-160121\_ZackD\_SS\_Set\_01\_Fraction 12763 FTMS; HC 44.79 803.9 SCG3

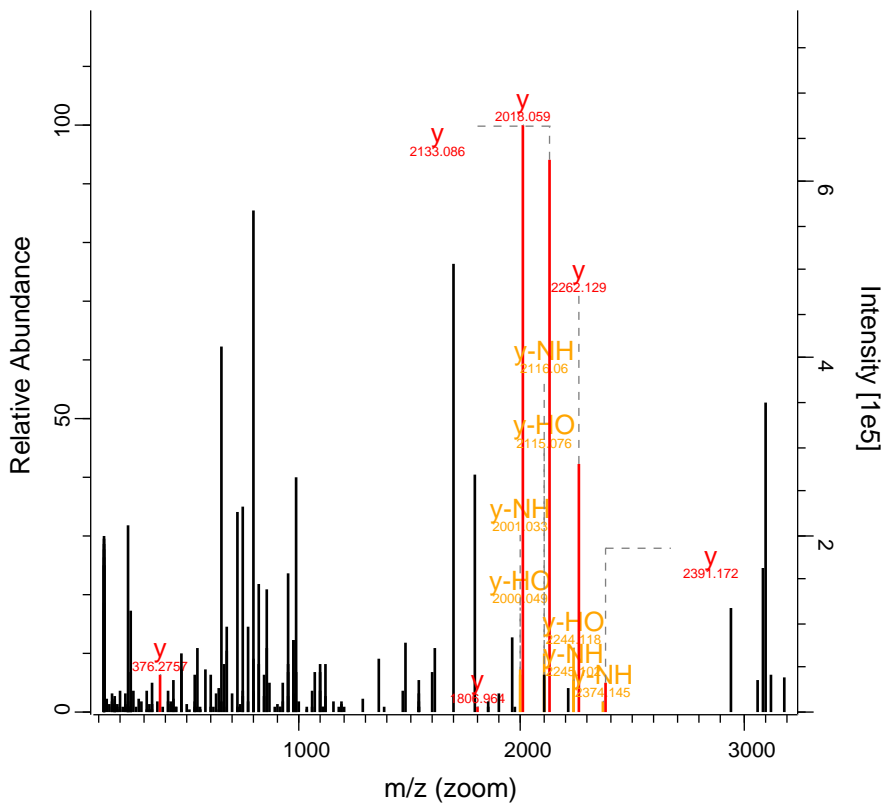

de

- E A N N Y E E D P N

y

K P T S W T E N Q A G

de de

y

K -

Raw File

Scan Method Score m/z

RO-QC-160121\_ZackD\_SS\_Set\_01\_Fraction\_12

14120 FTMS; HCD 57.1 423.28

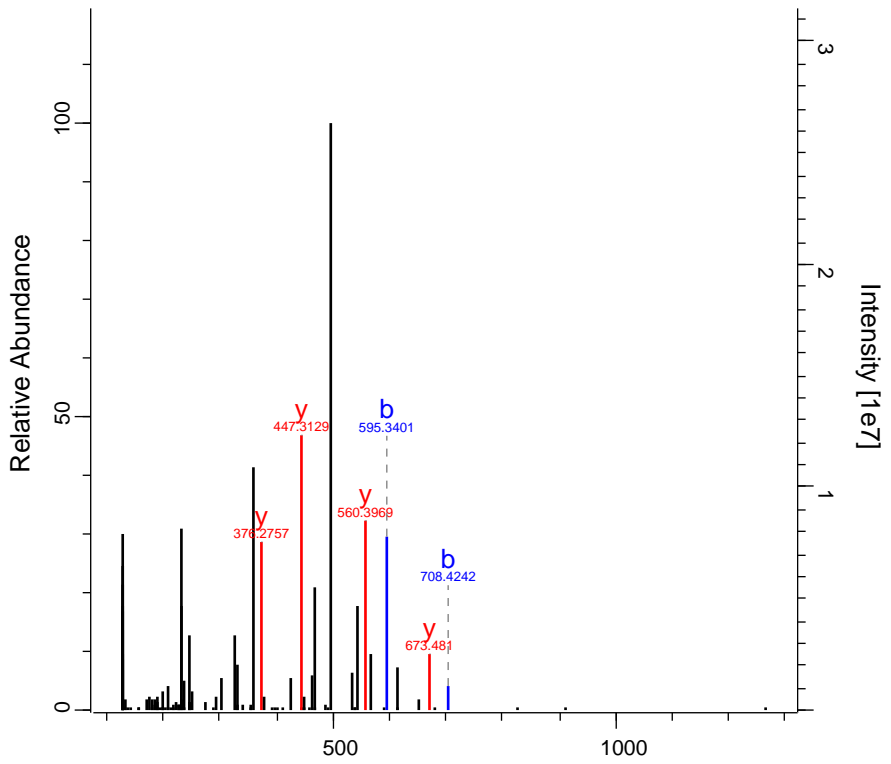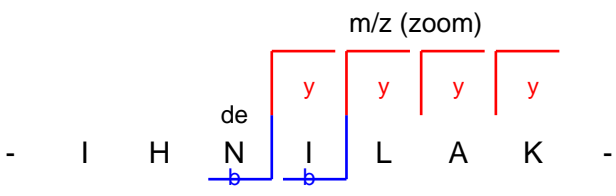

RO-QC-160121\_ZackD\_SS\_Set\_01\_Fraction\_12

14347 FTMS; HCD 57.1 423.28

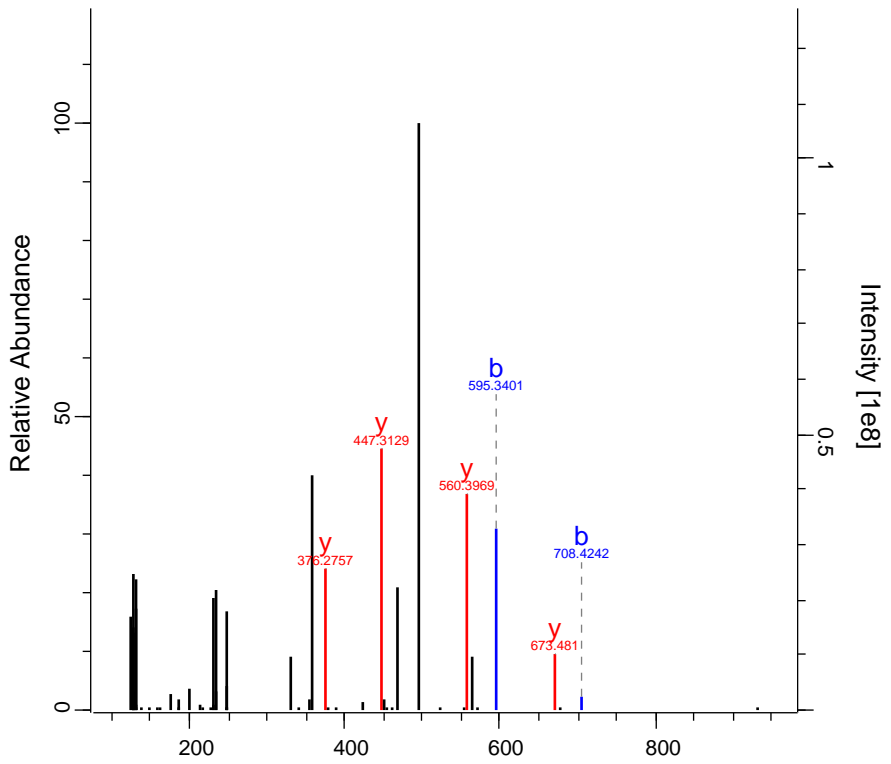

RO-QC-160121\_ZackD\_SS\_Set\_01\_Fraction1 15131 FTMS; HC 151.96 697.35 CCSMST1

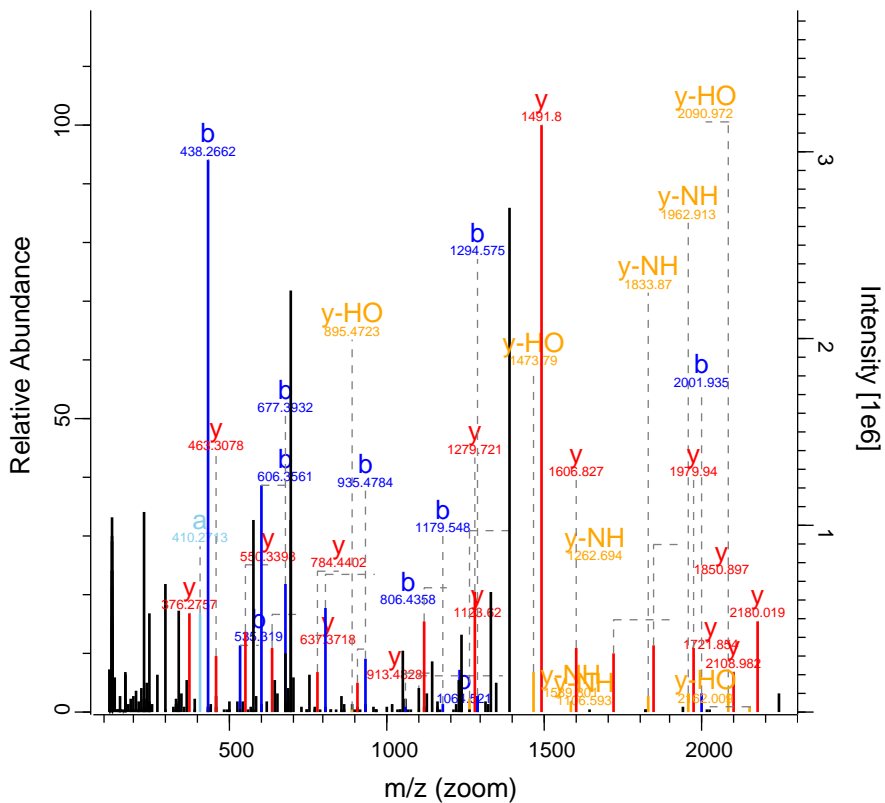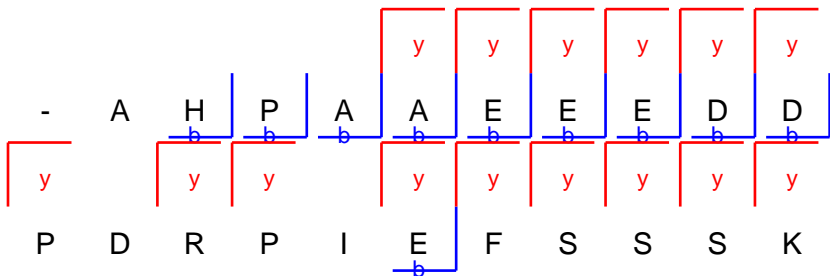

RO-QC-160121\_ZackD\_SS\_Set\_01\_Fraction15393 FTMS; HC 176.95 819.98 PLK2

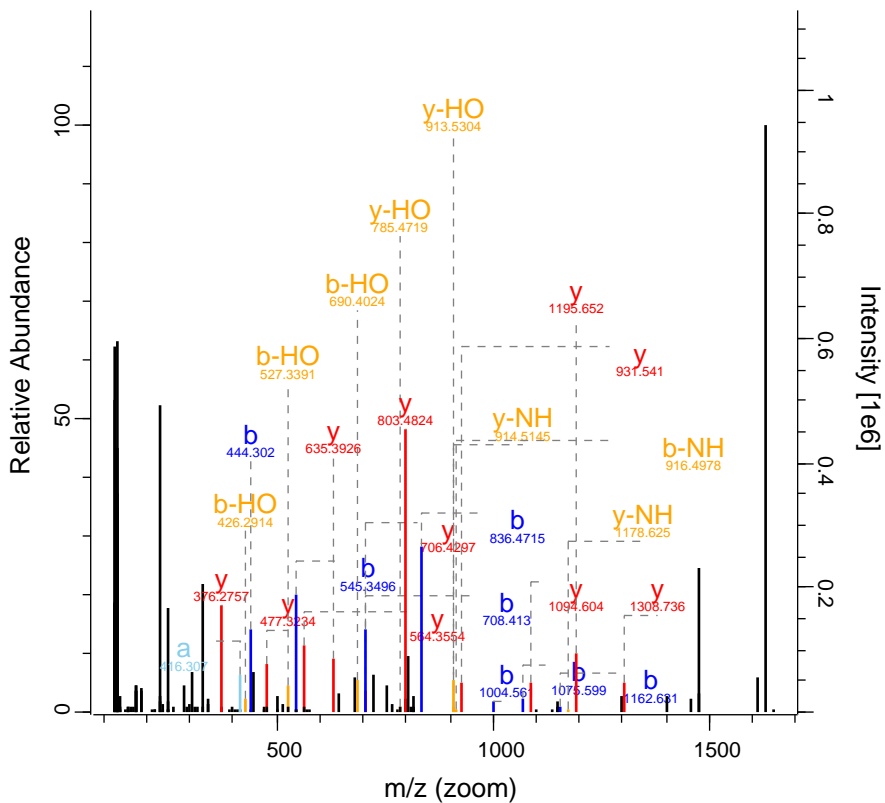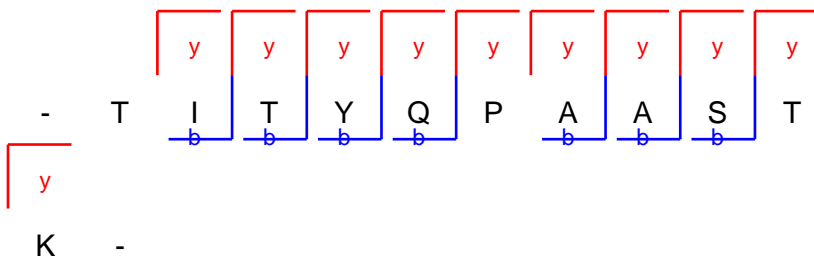

RO-QC-160121\_ZackD\_SS\_Set\_01\_Fraction1 15852 FTMS; HC 94.11 394.89 SSC5D

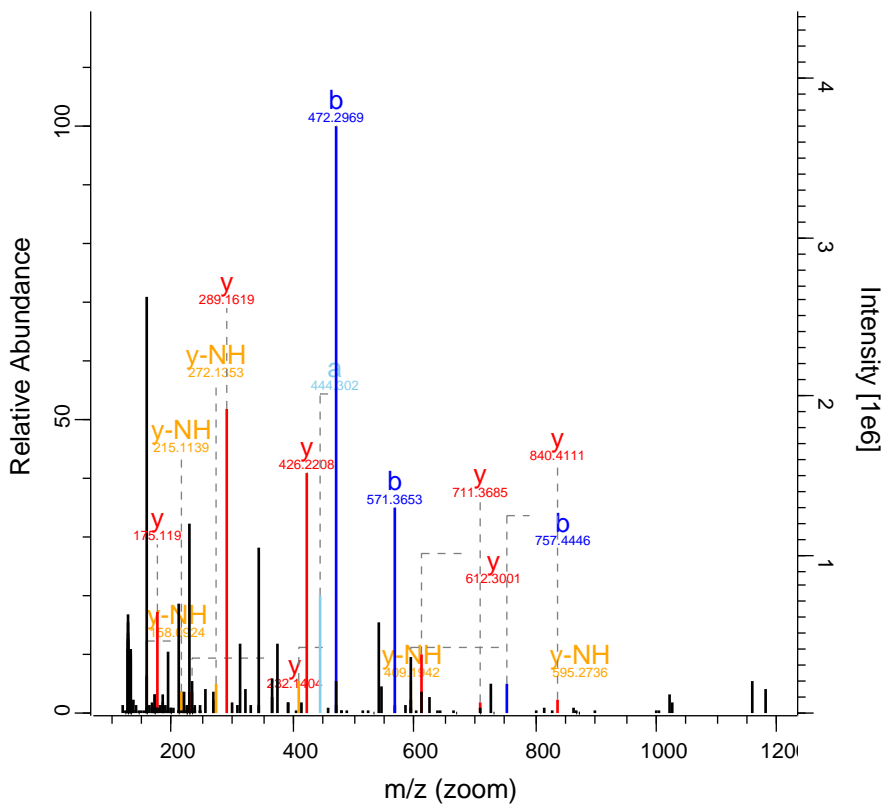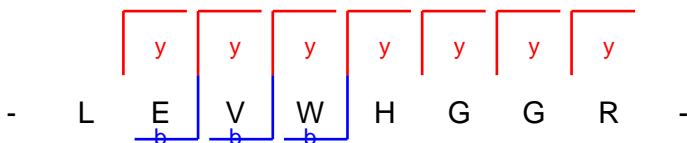

RO-QC-160121\_ZackD\_SS\_Set\_01\_Fraction16637 FTMS; HC 93.26 841.44 AIF1L

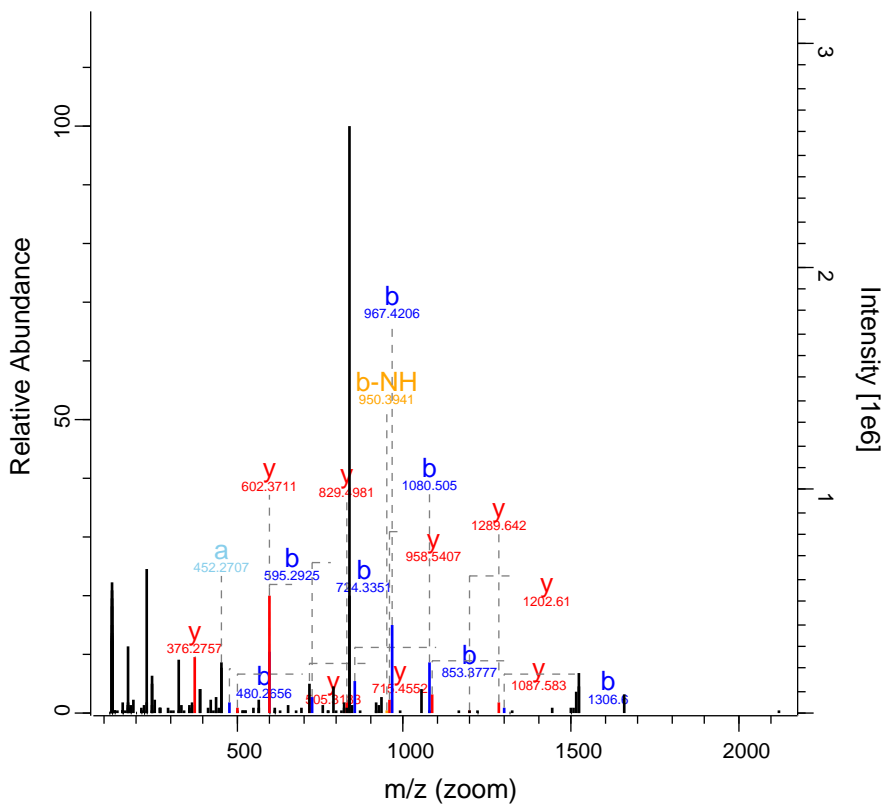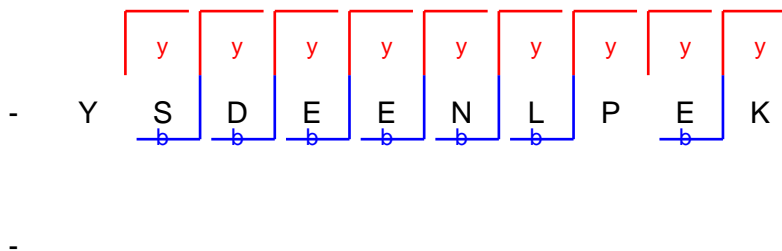



RO-QC-160121\_ZackD\_SS\_Set\_01\_Fraction16840 FTMS; HC 107.66 781.49 LRR1Q1

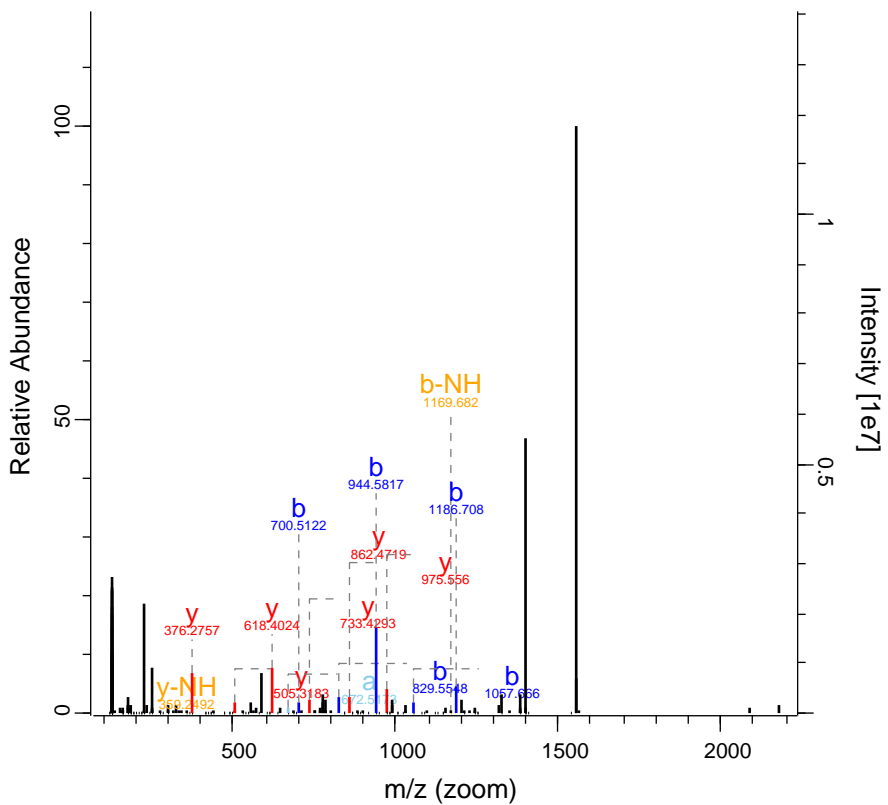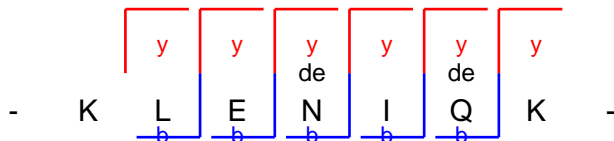



RO-QC-160121\_ZackD\_SS\_Set\_01\_Fraction17823 FTMS; HC 114.93 732.91 POMP

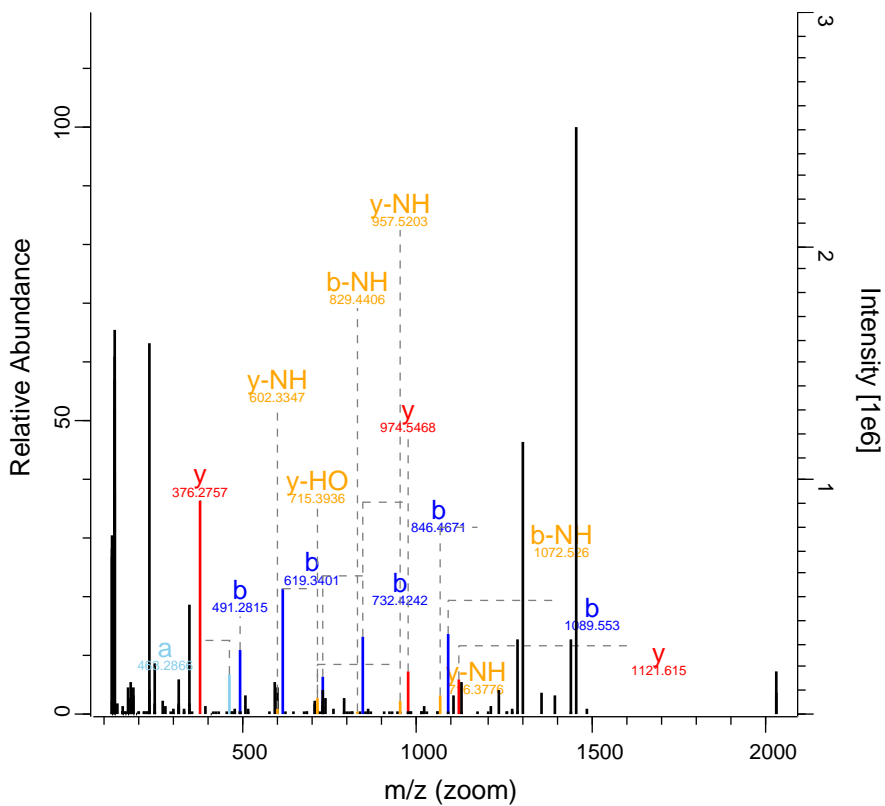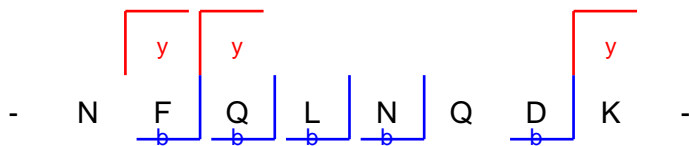

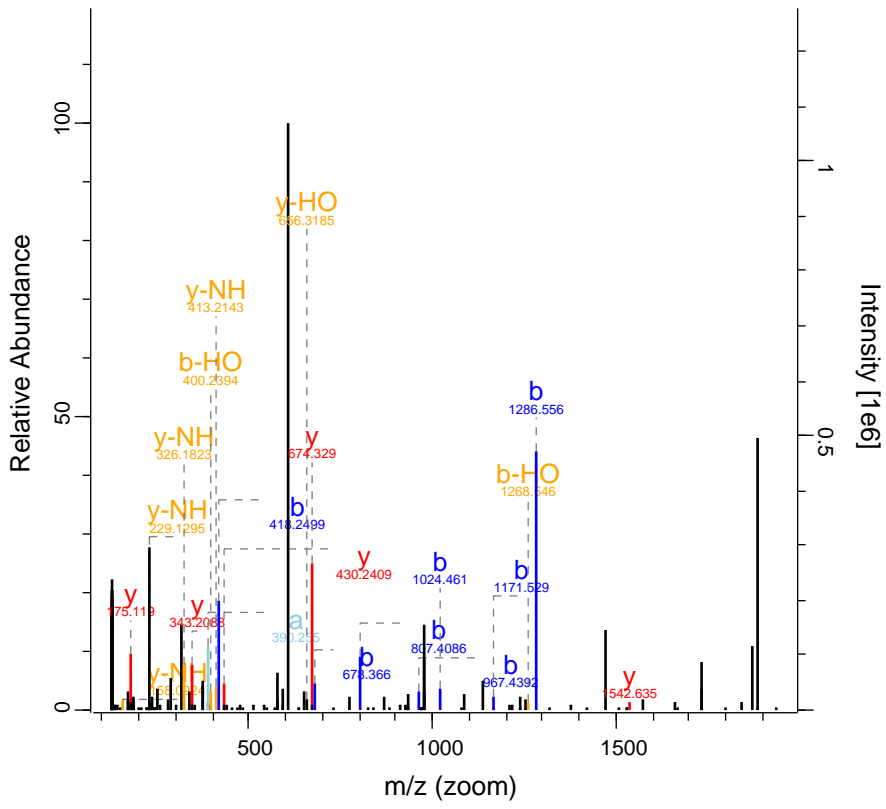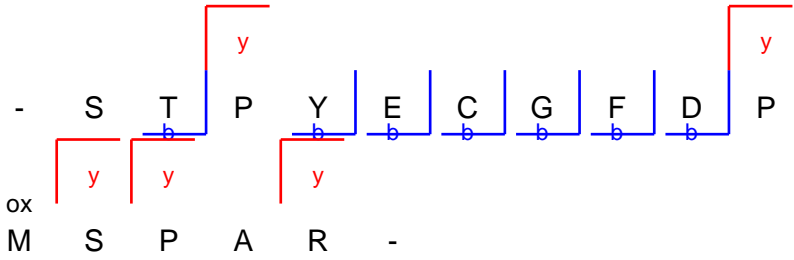

ox  
M S P A R -

Raw File

Scan Method Score m/z

RO-QC-160121\_ZackD\_SS\_Set\_01\_Fraction\_12

19137

FTMS; HCD

116.35

589.36

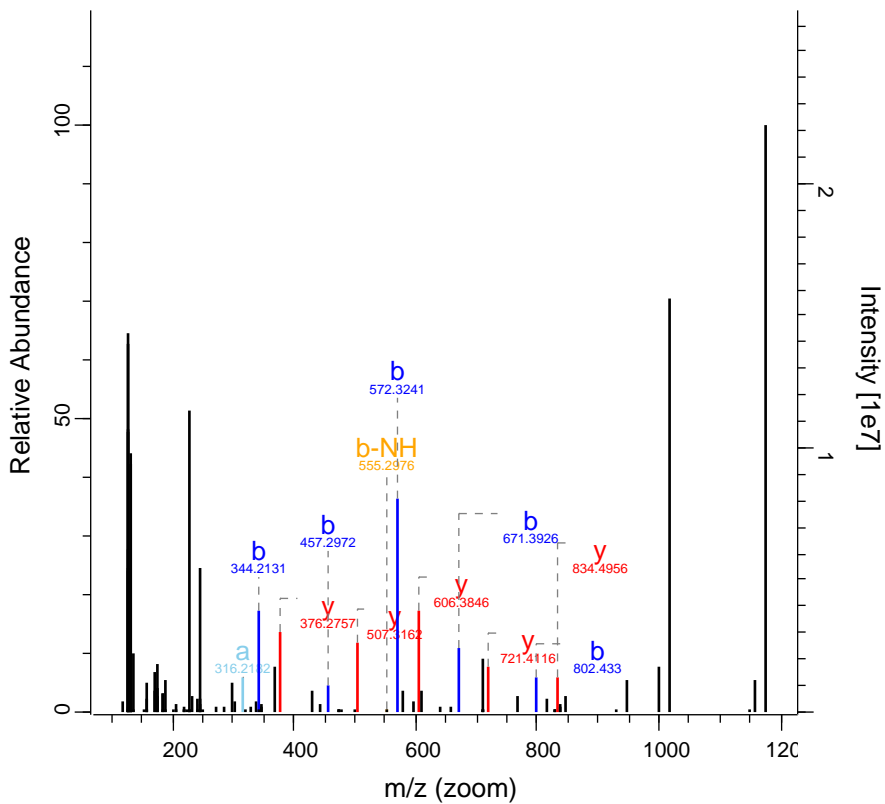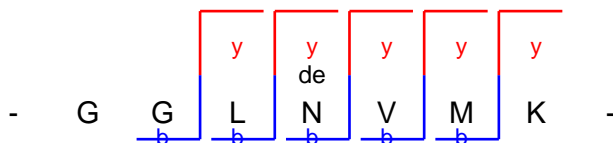

RO-QC-160121\_ZackD\_SS\_Set\_01\_Fraction 20102 FTMS; HC 50.12 964.47 C3orf49

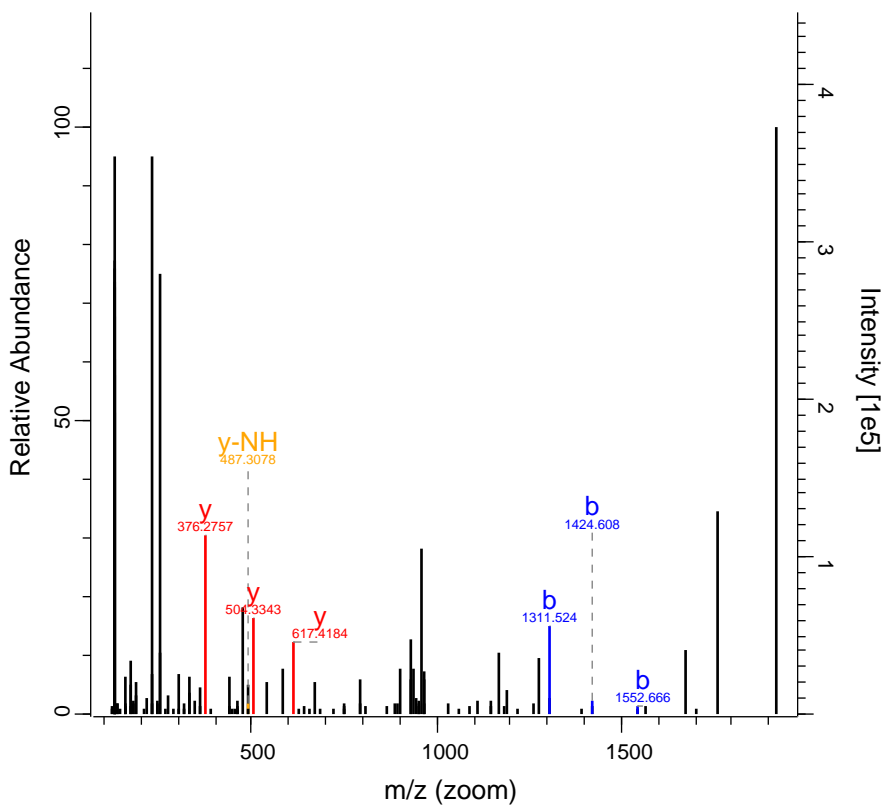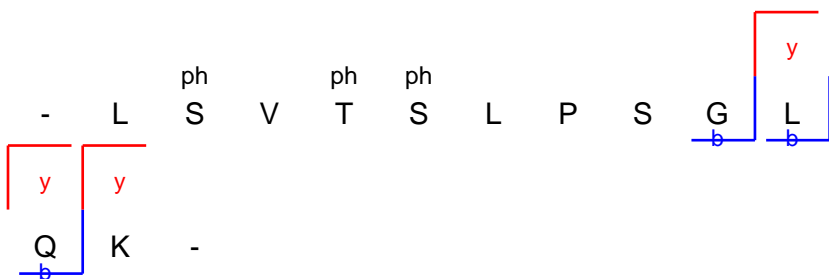

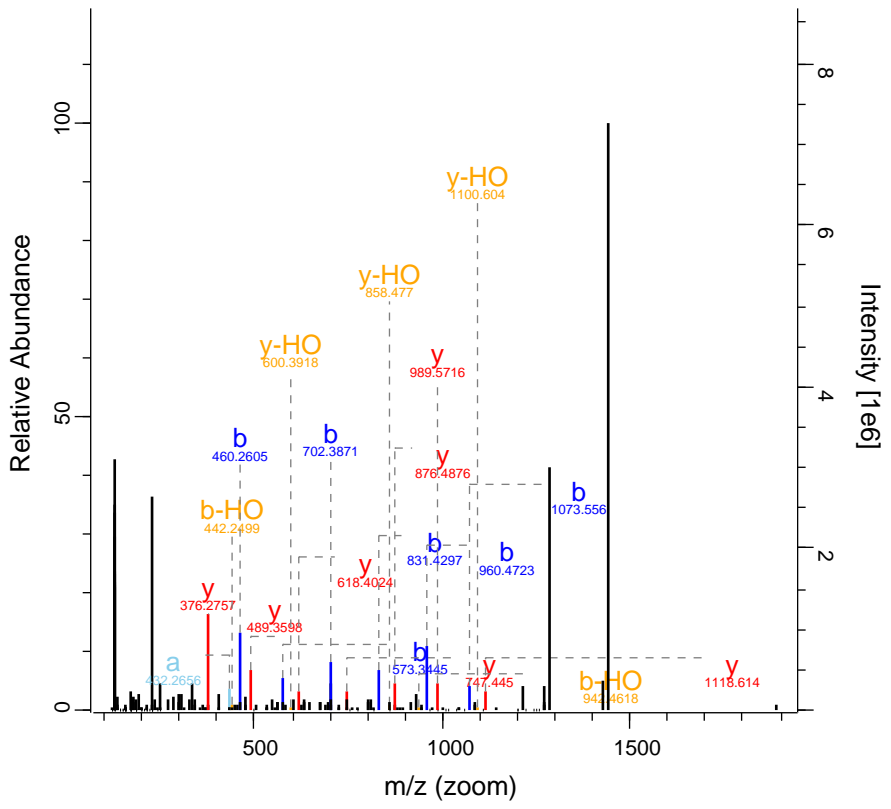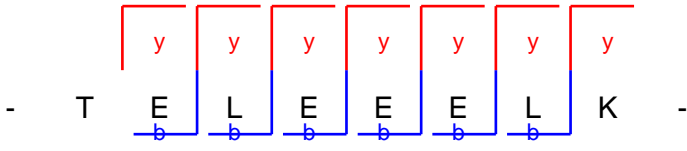

RO-QC-160121\_ZackD\_SS\_Set\_01\_Fraction 21185 FTMS; HC 109.29 497.31 BLOC1S6

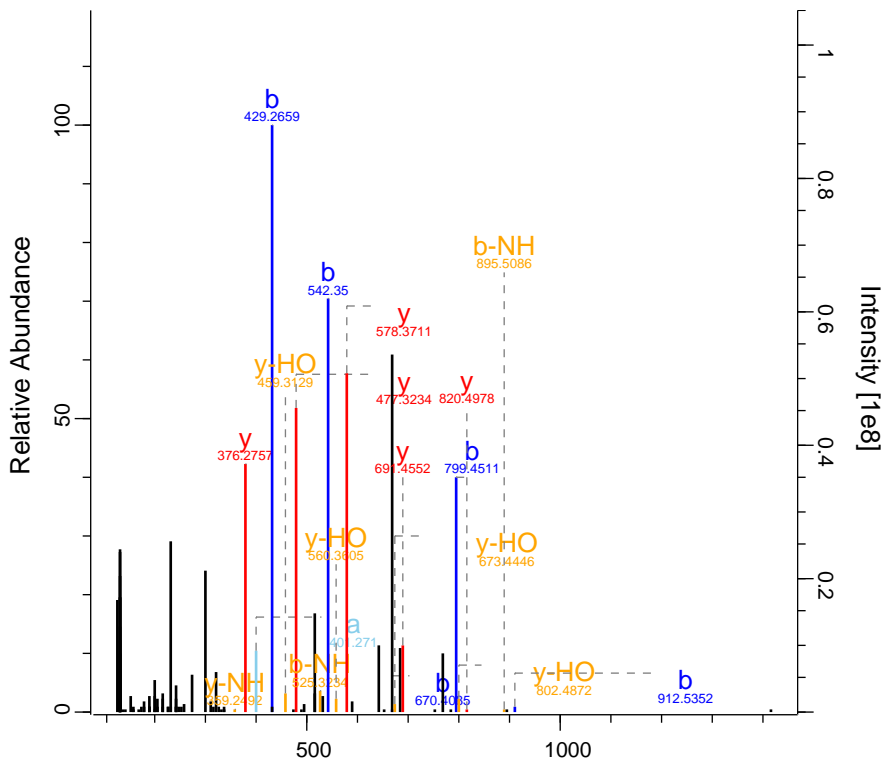

m/z (zoom)

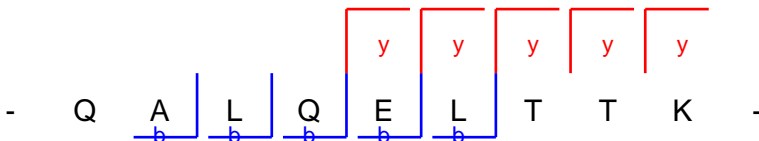



RO-QC-160121\_ZackD\_SS\_Set\_01\_Fraction 21438 FTMS; HC 54.61 826.47 T

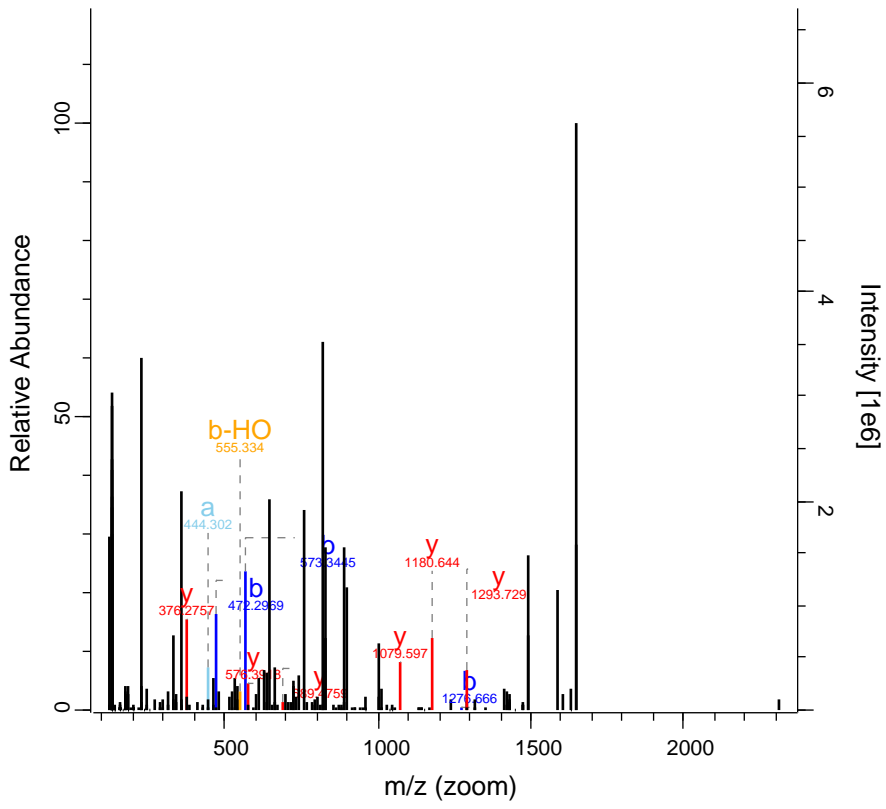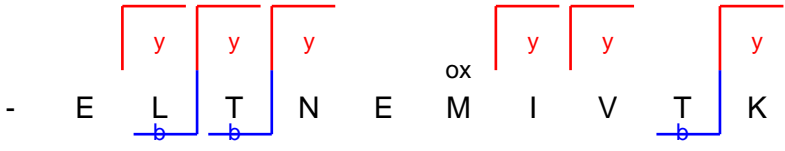

-

RO-QC-160121\_ZackD\_SS\_Set\_01\_Fraction 21679 FTMS; HC 60.59 826.47 T

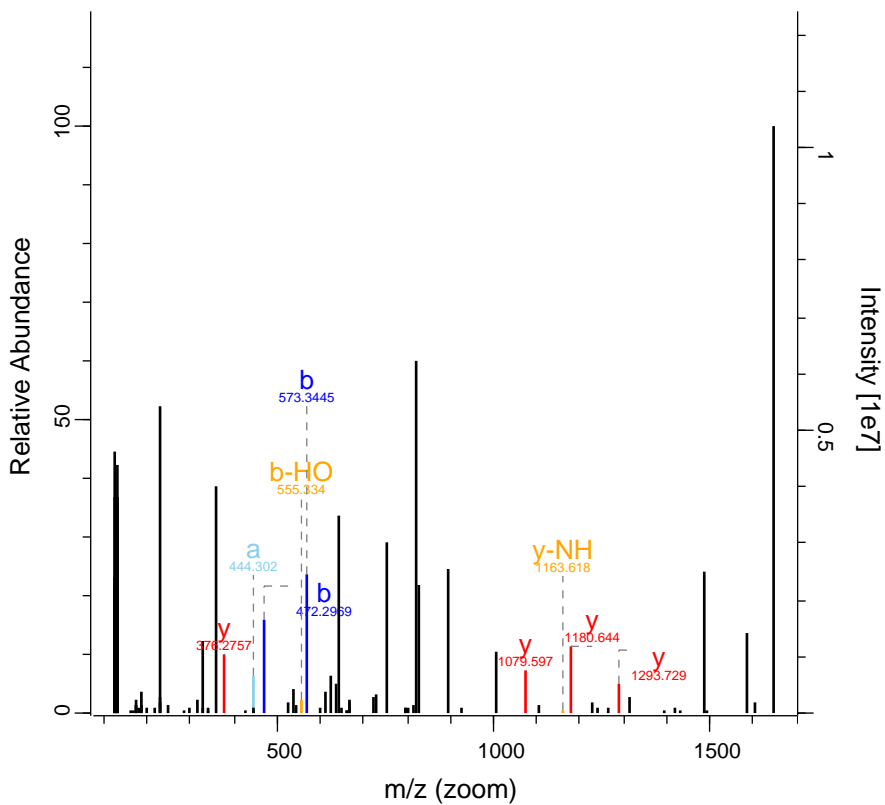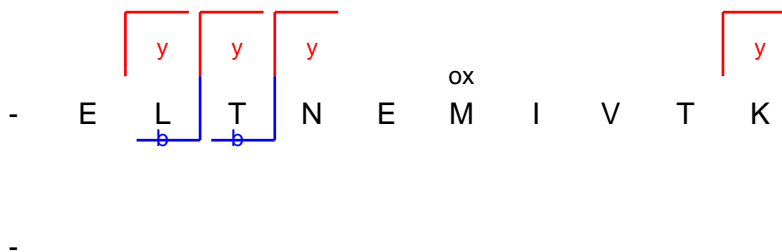

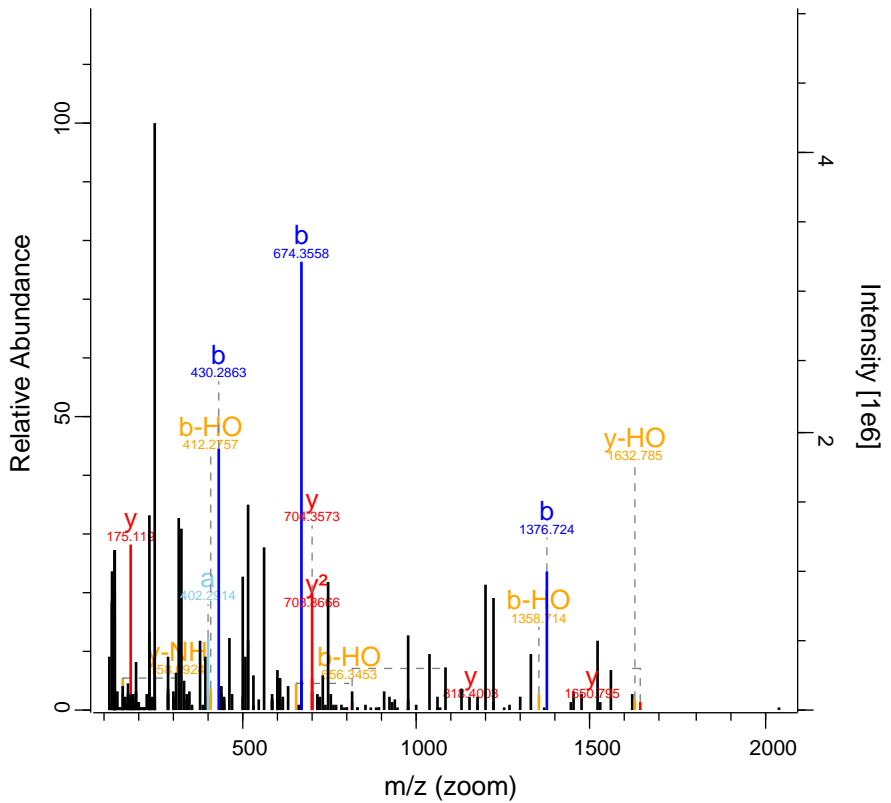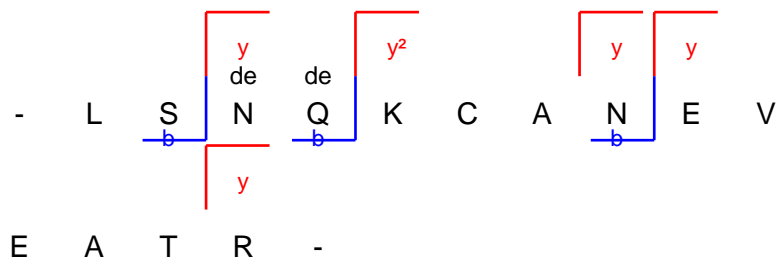

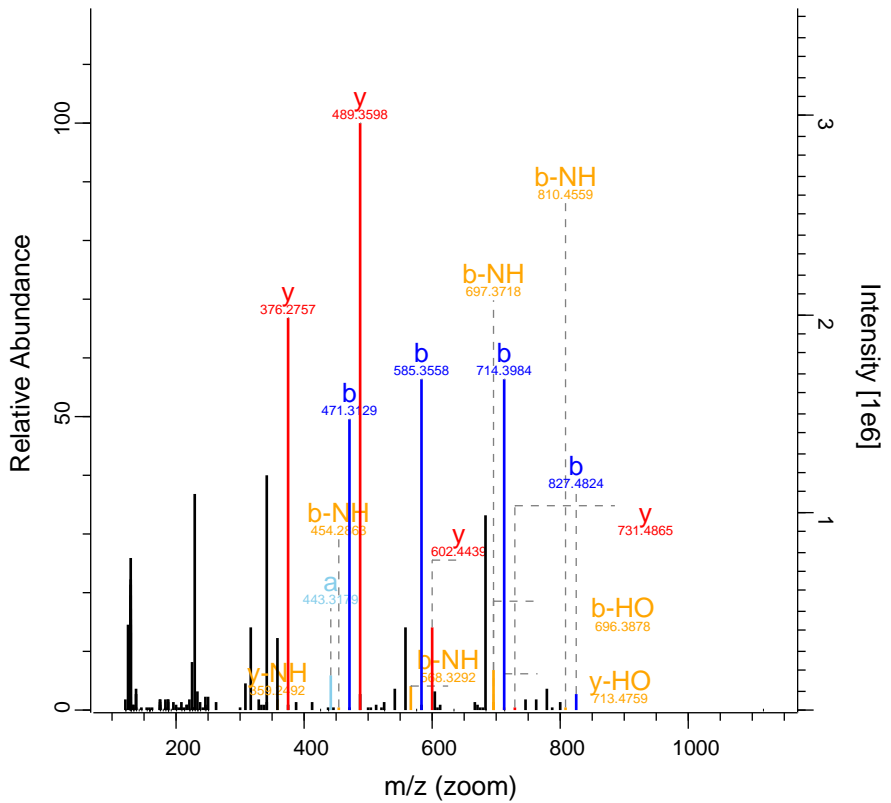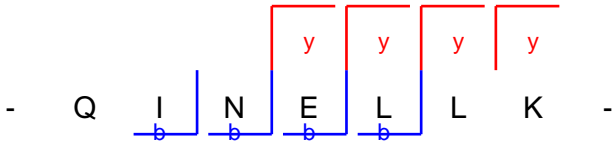

RO-QC-160121\_ZackD\_SS\_Set\_01\_Fraction 22538 FTMS; HC 64.3 912.51 UGCG

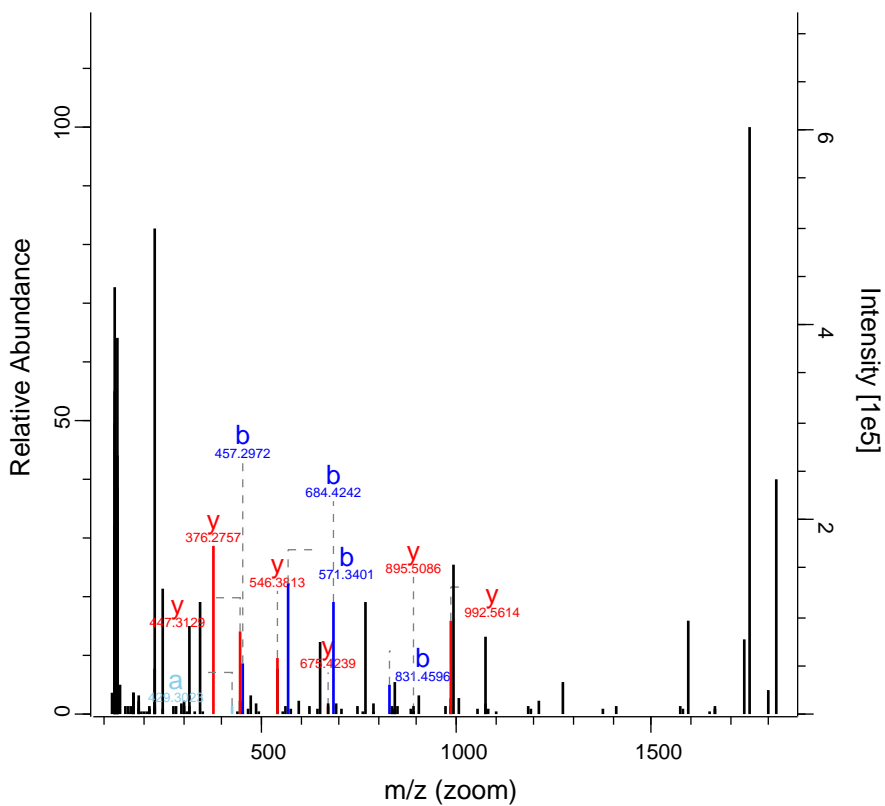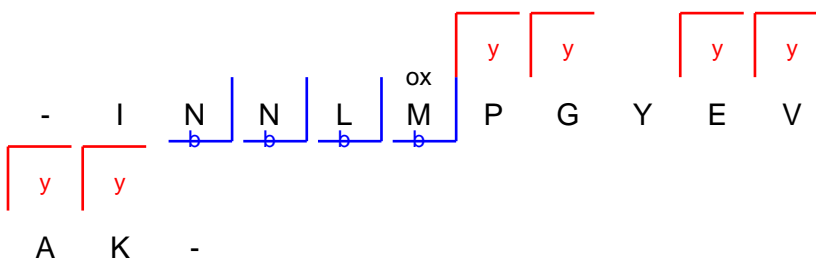

| Raw File                                 | Scan  | Method    | Score | m/z    |
|------------------------------------------|-------|-----------|-------|--------|
| RO-QC-160121_ZackD_SS_Set_01_Fraction_12 | 22661 | FTMS; HCD | 63.31 | 439.28 |

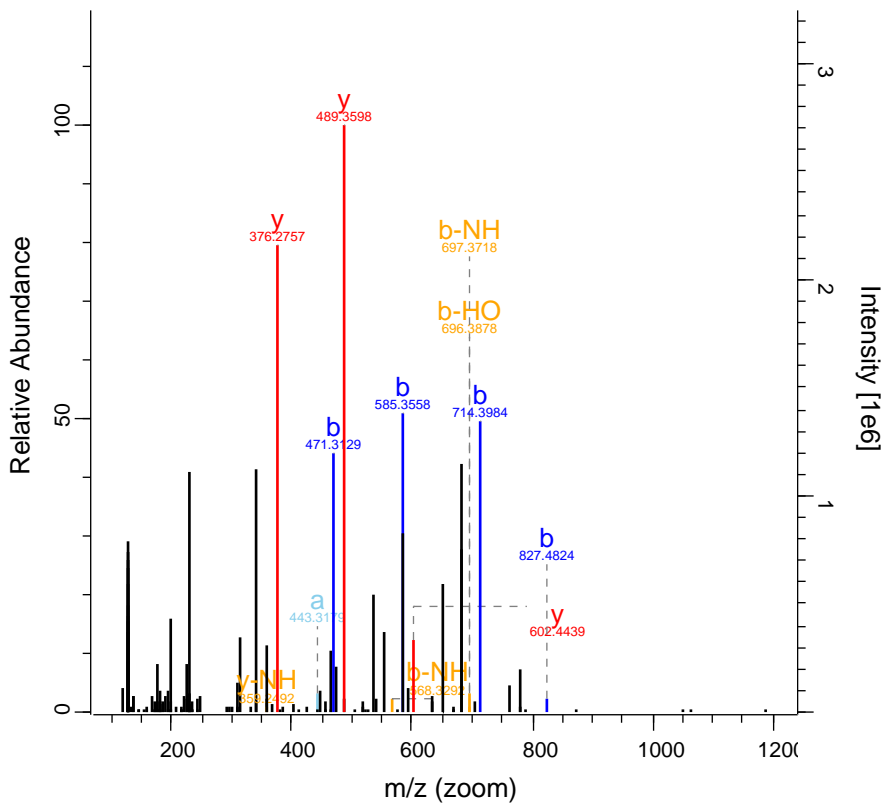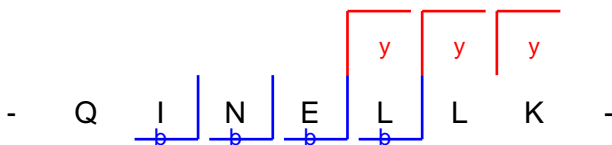

RO-QC-160121\_ZackD\_SS\_Set\_01\_Fraction 22719 FTMS; HC 104.06 429.59 KANSL2

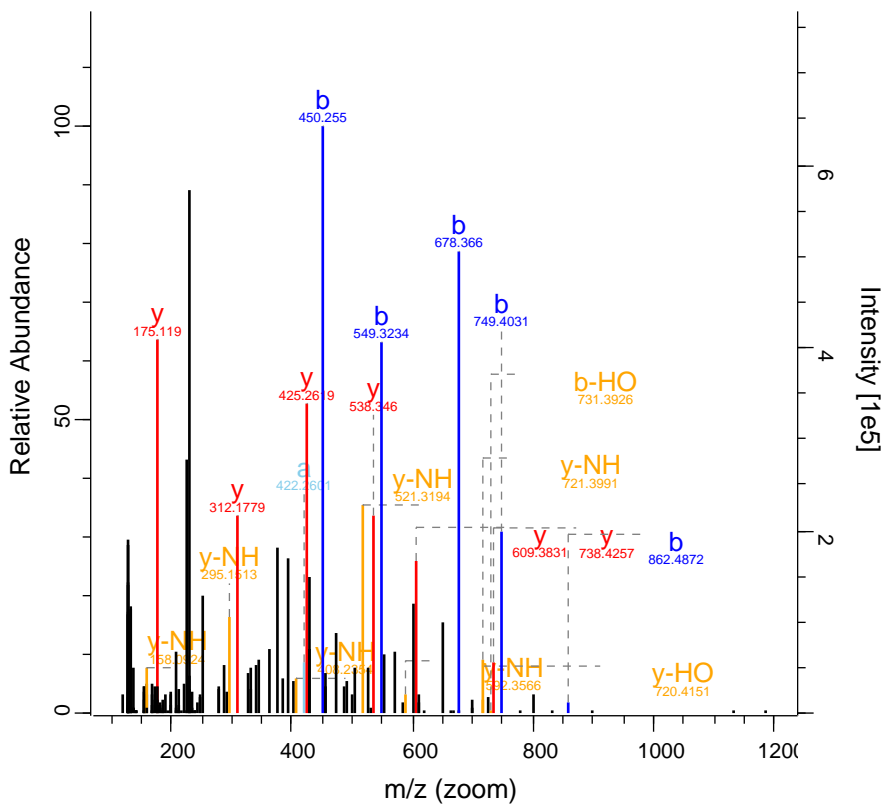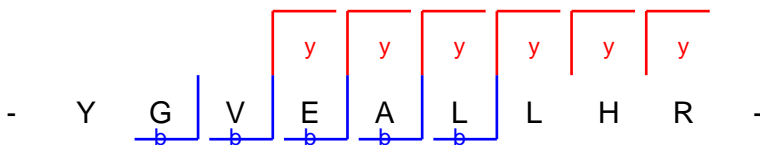

RO-QC-160121\_ZackD\_SS\_Set\_01\_Fraction 22901 FTMS; HC 111.46 538.97 SEC61B

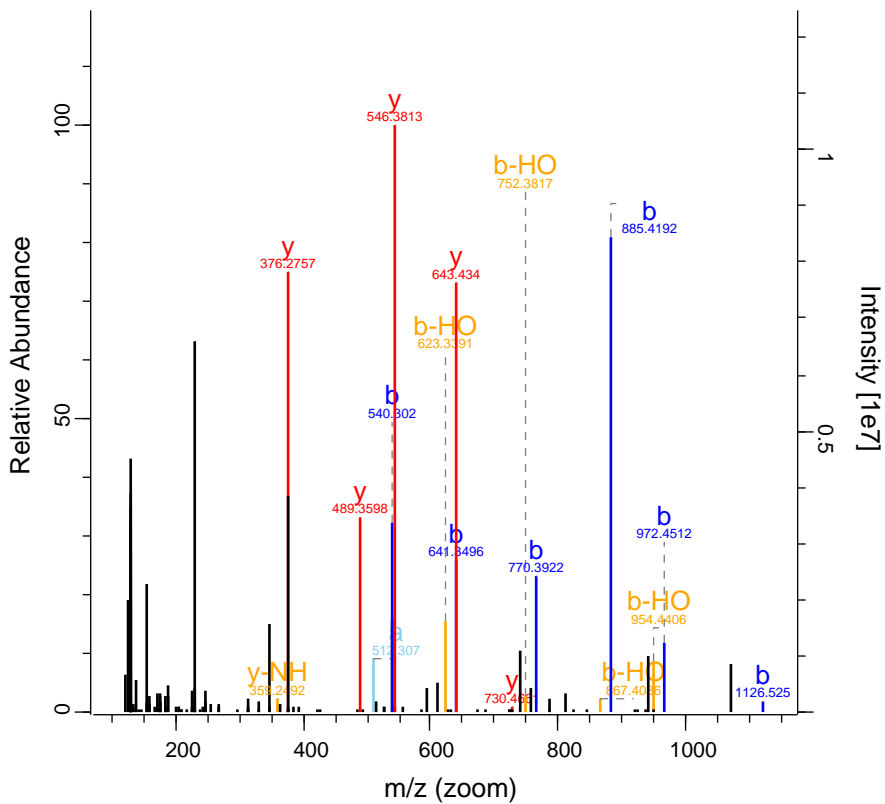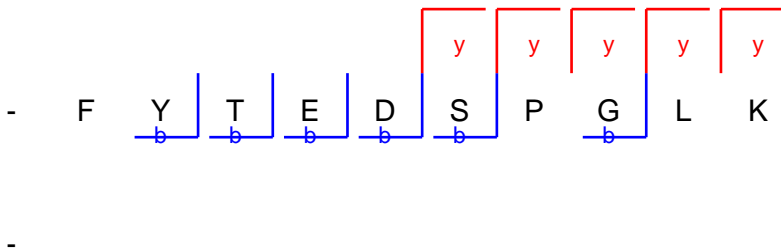



RO-QC-160121\_ZackD\_SS\_Set\_01\_Fraction 22931 FTMS; HC 163.32 807.94 SEC61B

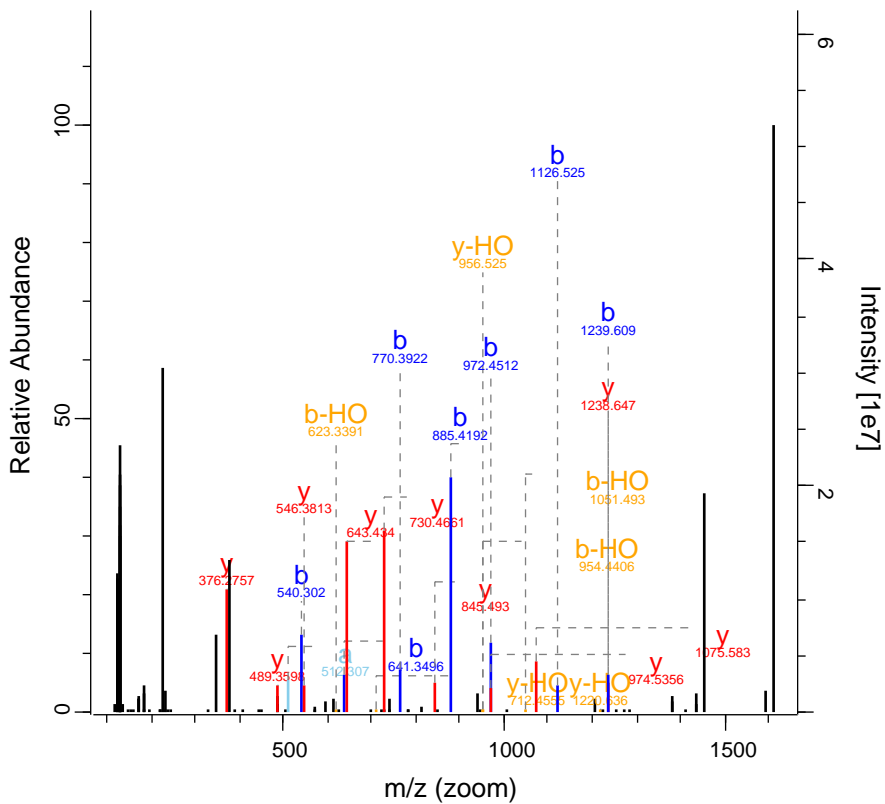

m/z (zoom)

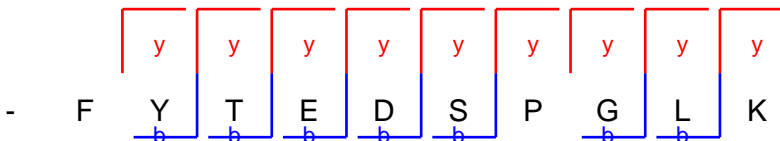

RO-QC-160121\_ZackD\_SS\_Set\_01\_Fraction 23166 FTMS; HC 90.15 807.94 SEC61B

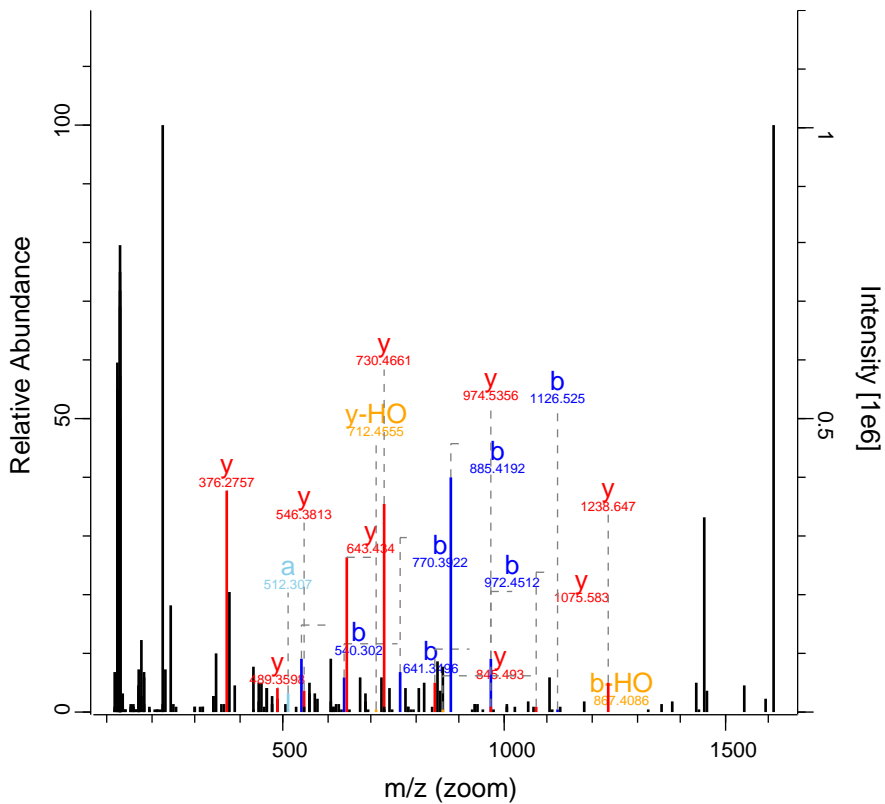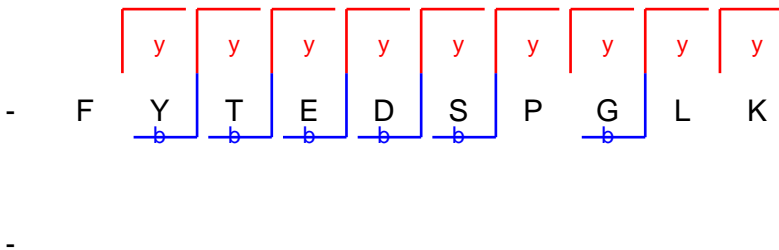



RO-QC-160121\_ZackD\_SS\_Set\_01\_Fractio 25167 FTMS; HC 130.07 1080.58 CD99L2

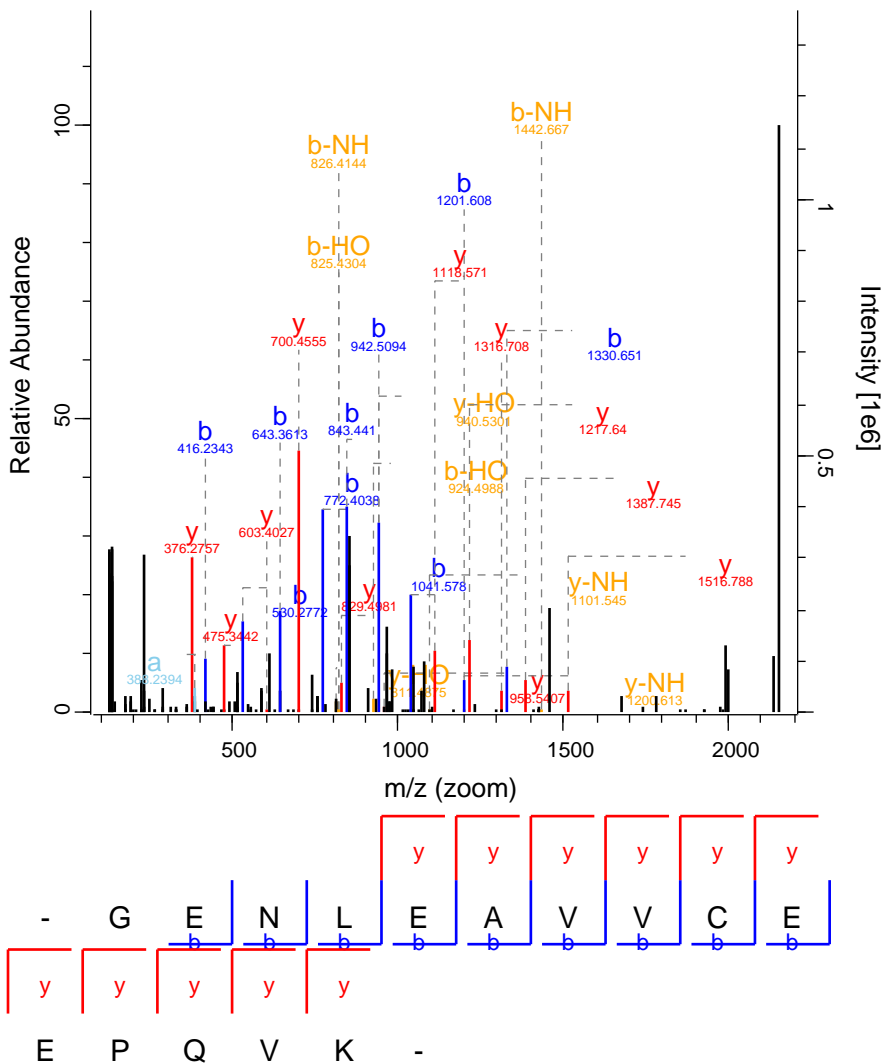

RO-QC-160121\_ZackD\_SS\_Set\_01\_Fraction 25657 FTMS; HC 122.33 863.44 MT-ND6

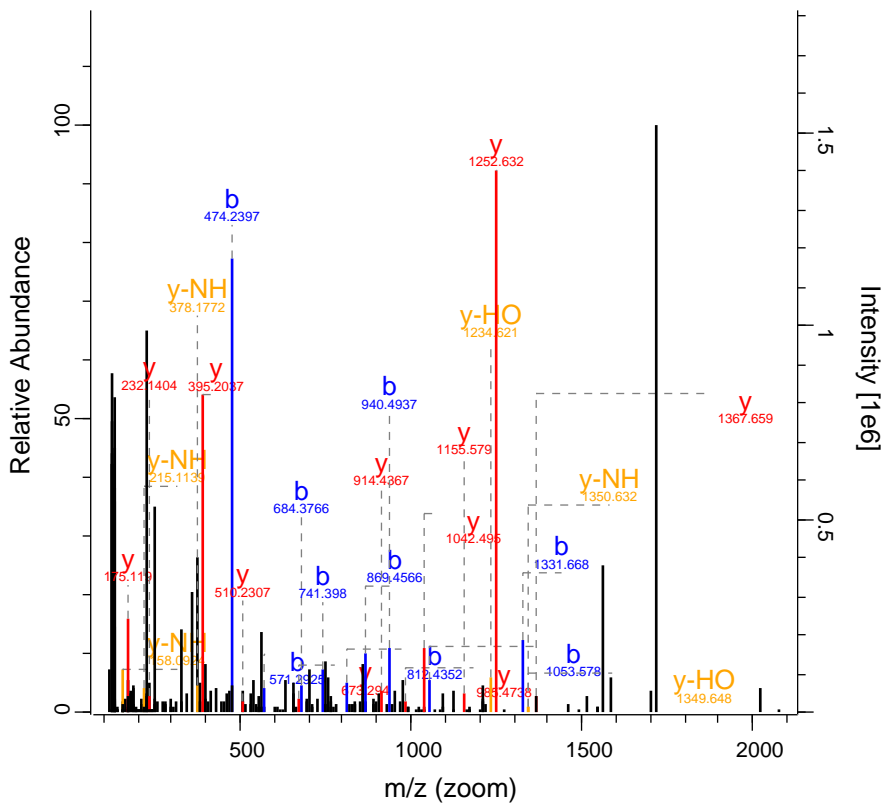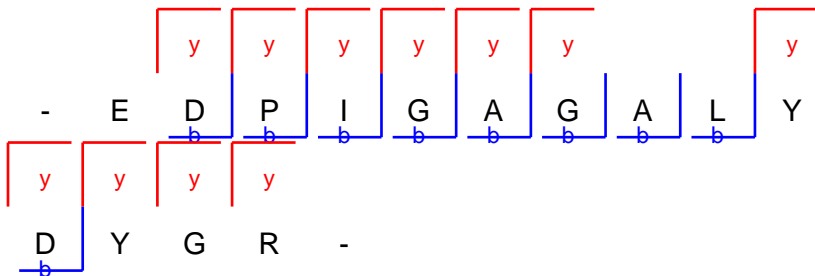



RO-QC-160121\_ZackD\_SS\_Set\_01\_Fraction 25892 FTMS; HC 34.72 595.98 MRPL35

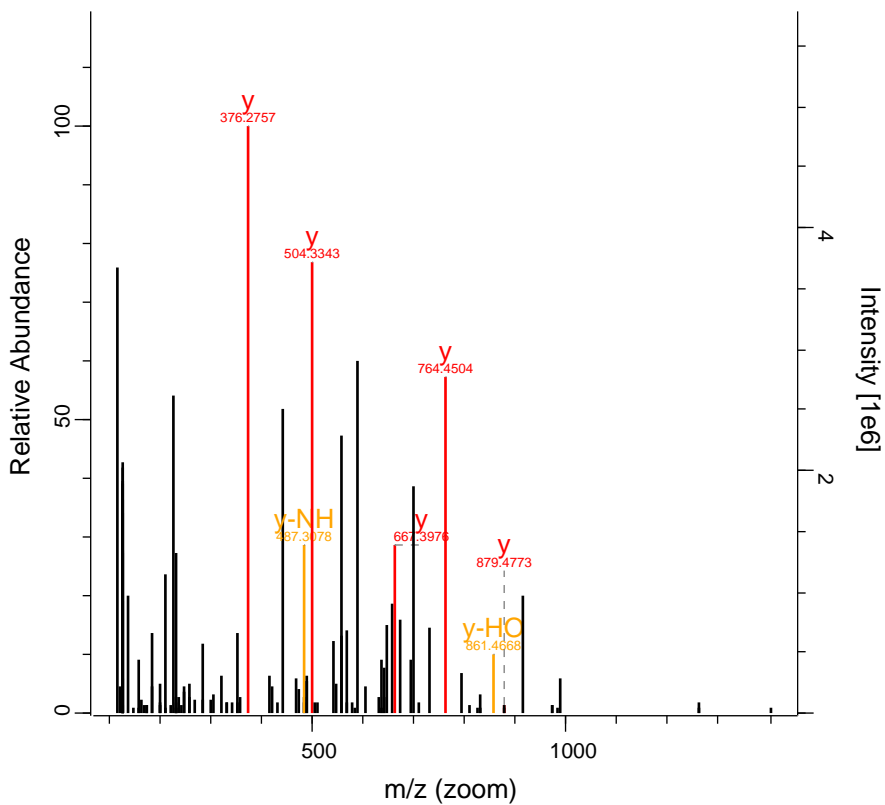

m/z (zoom)

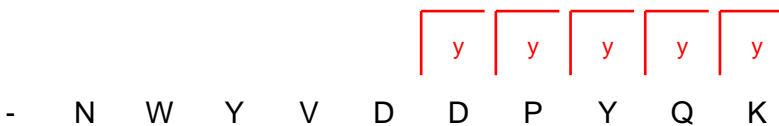

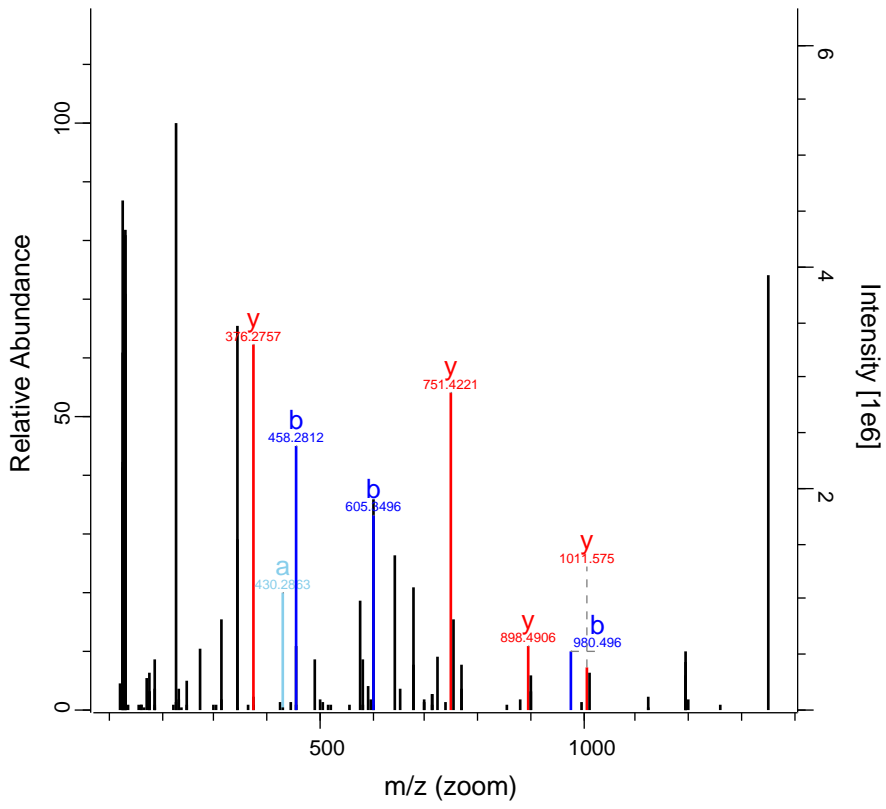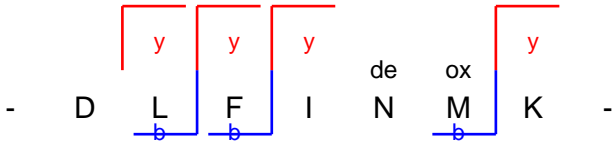



RO-QC-160121\_ZackD\_SS\_Set\_01\_Fraction 26216 FTMS; HC 48.09 1049.52 ZNF107

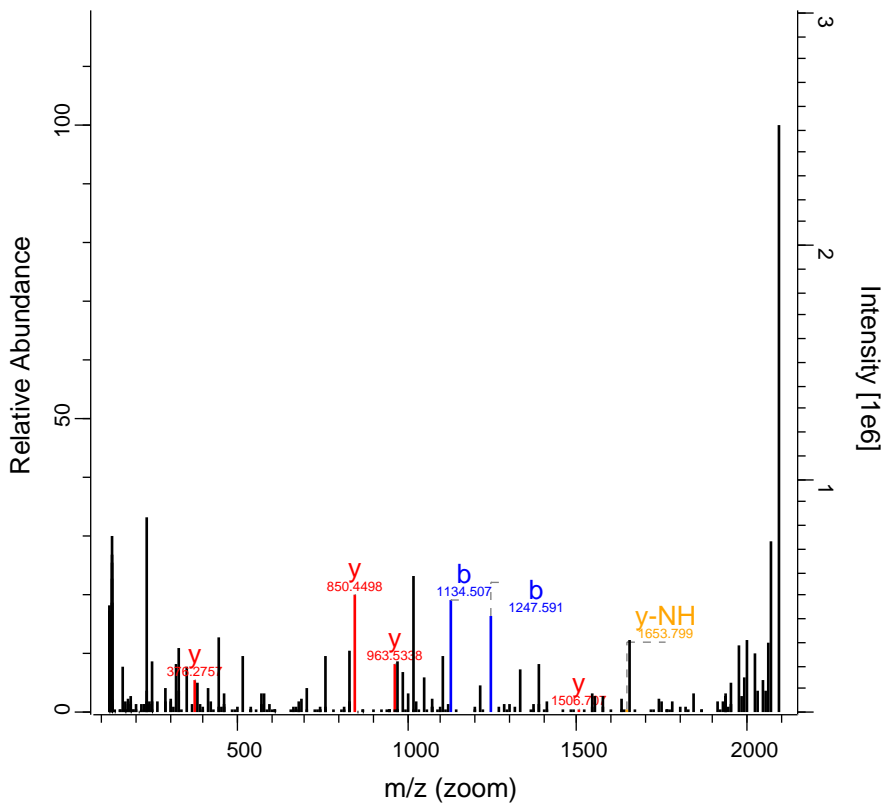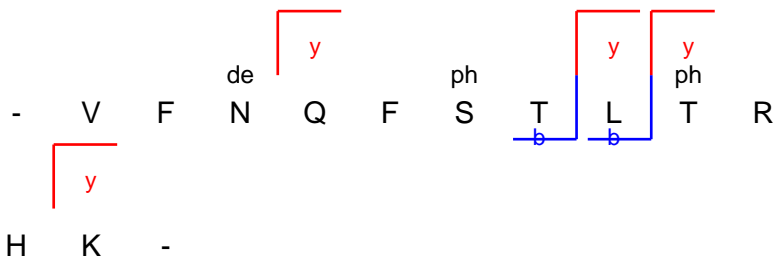

RO-QC-160121\_ZackD\_SS\_Set\_01\_Fraction 26465 FTMS; HC 45.92 849.45 SLC31A1

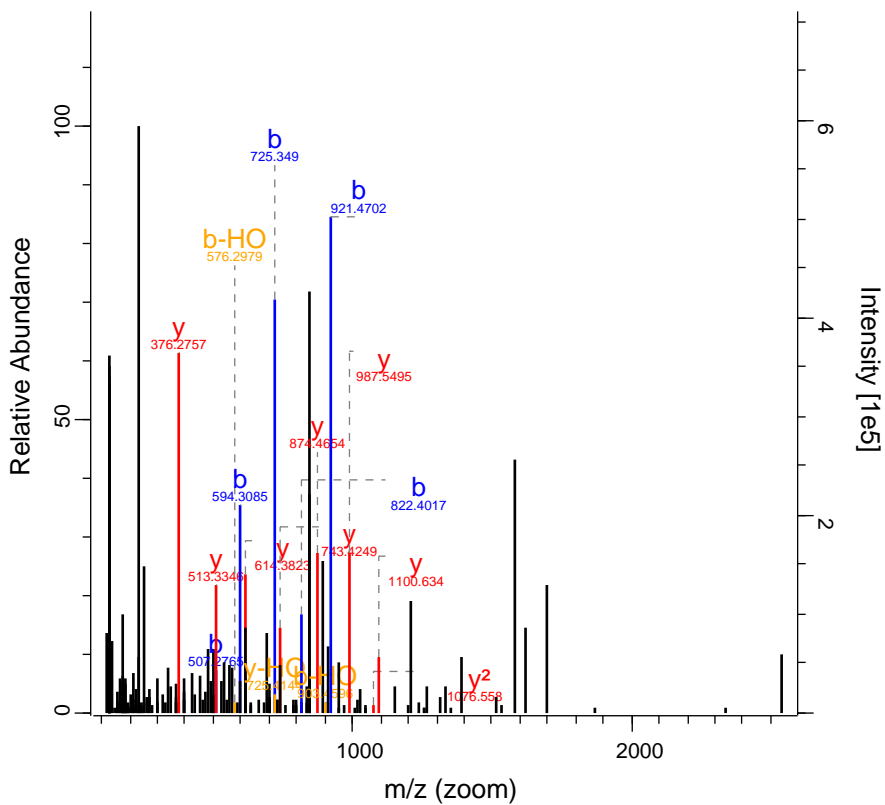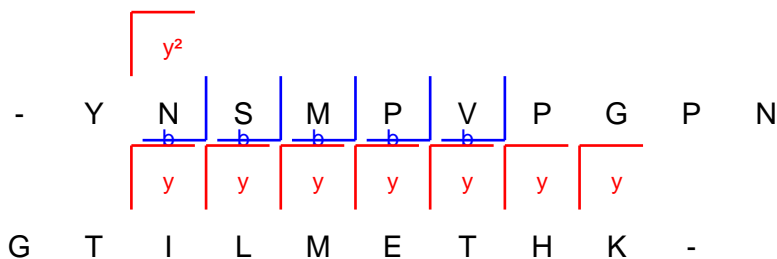



RO-QC-160121\_ZackD\_SS\_Set\_01\_Fraction 28542 FTMS; HC 132.88 690.93 MAL2

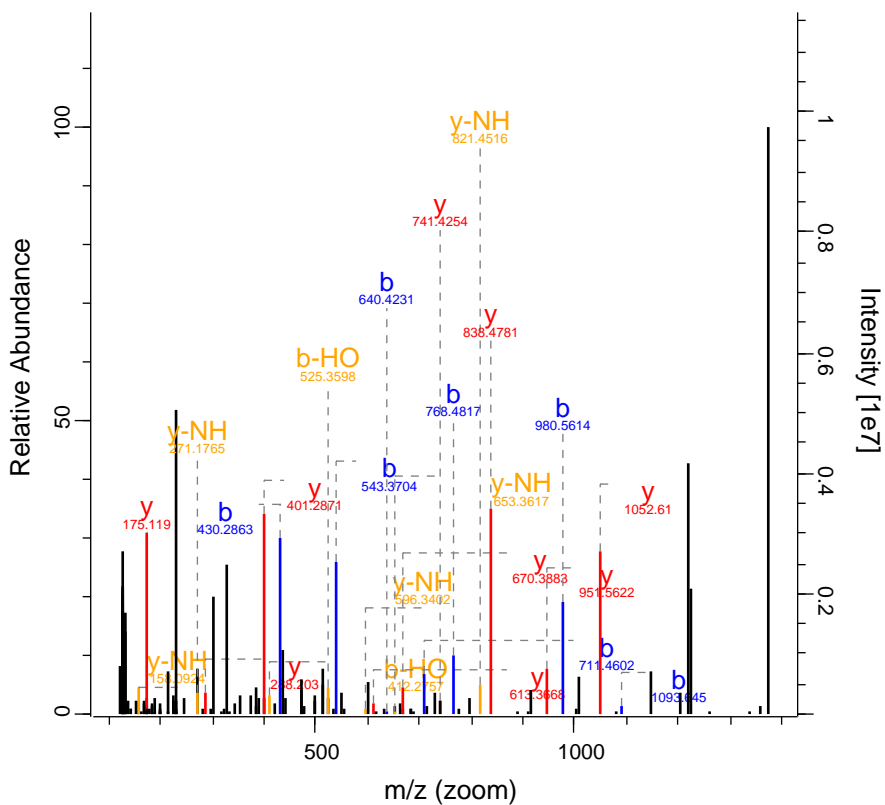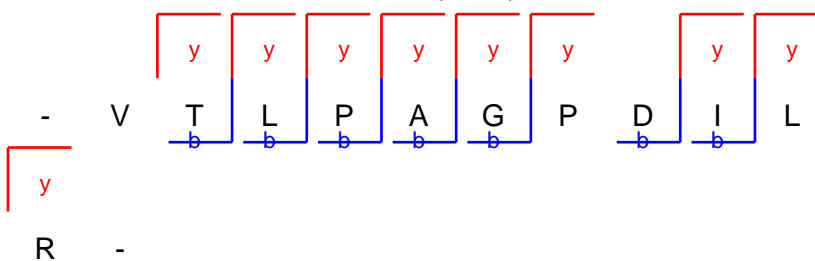

RO-QC-160121\_ZackD\_SS\_Set\_01\_Fraction

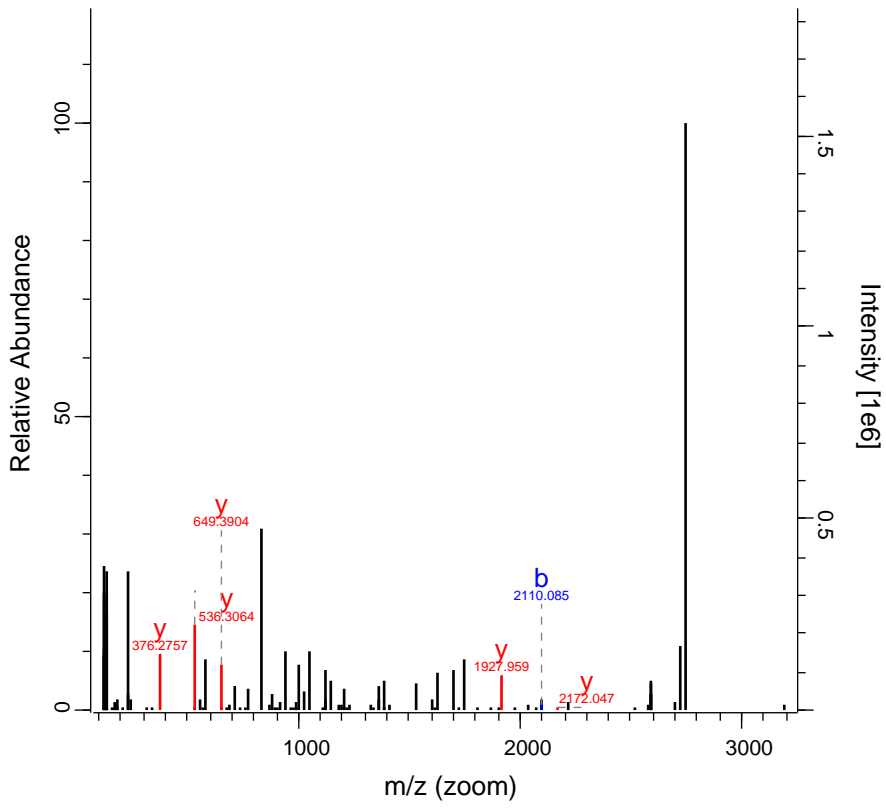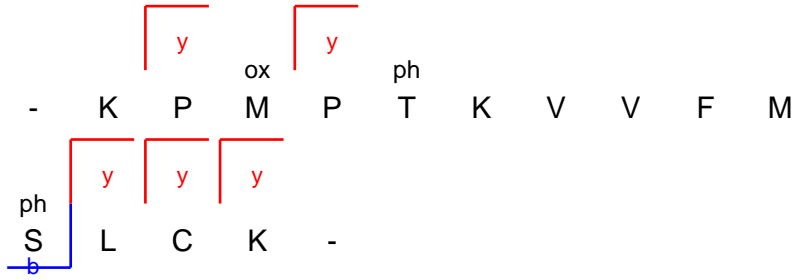

RO-QC-160121\_ZackD\_SS\_Set\_01\_Fraction 30156 FTMS; HC 59.57 601.03 FAM184B

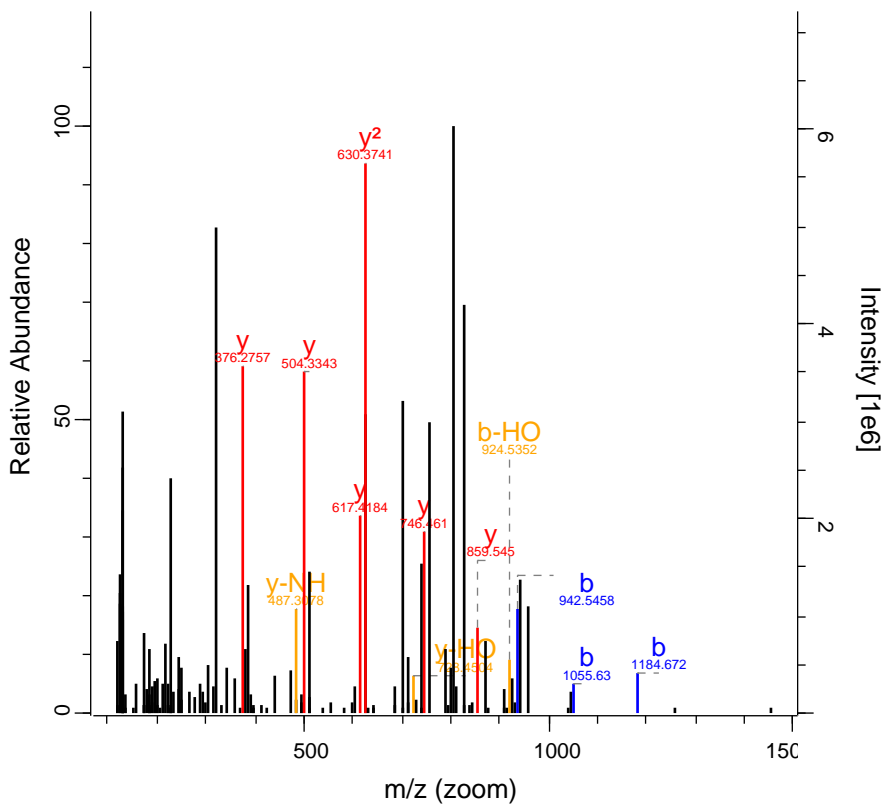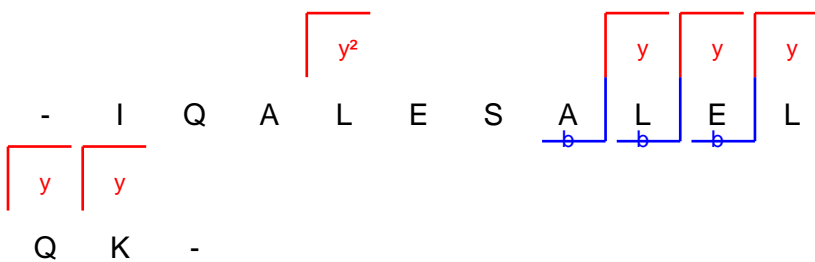

RO-QC-160121\_ZackD\_SS\_Set\_01\_Fraction 30314 FTMS; HC 49.12 842.16 SIRT7

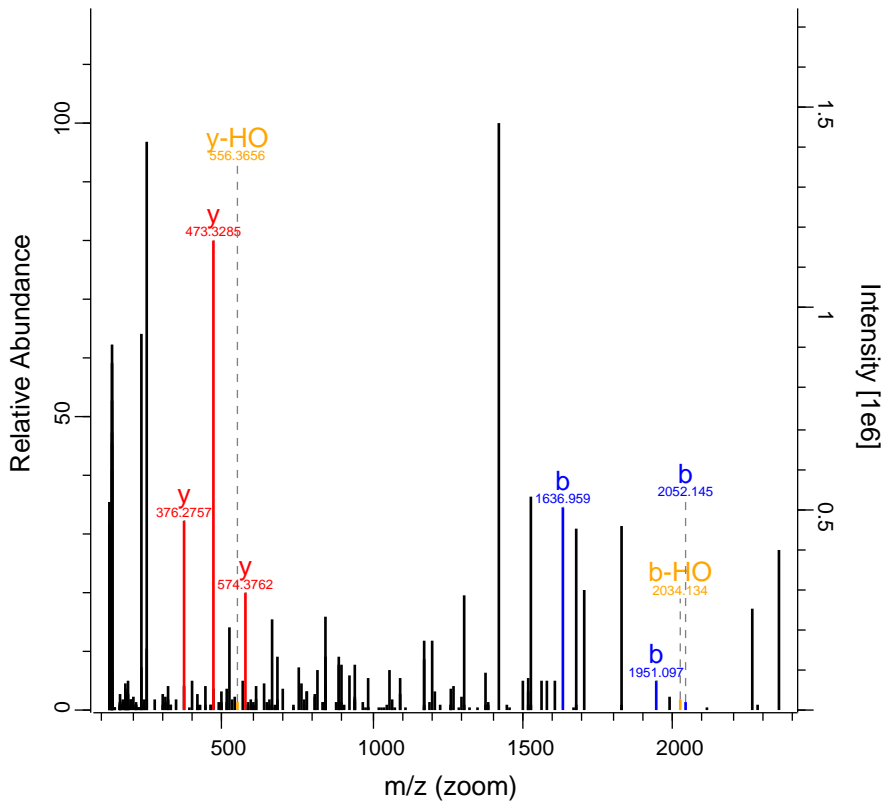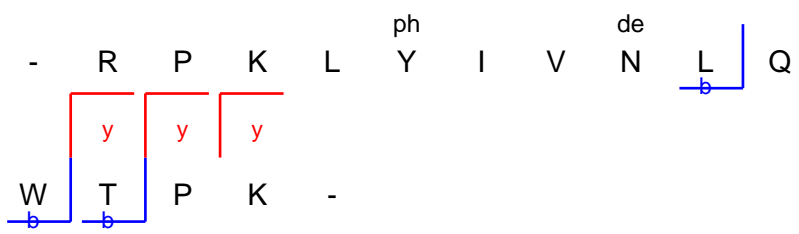





RO-QC-160121\_ZackD\_SS\_Set\_01\_Fraction 30387 FTMS; HC 90.11 901.05 FAM184B

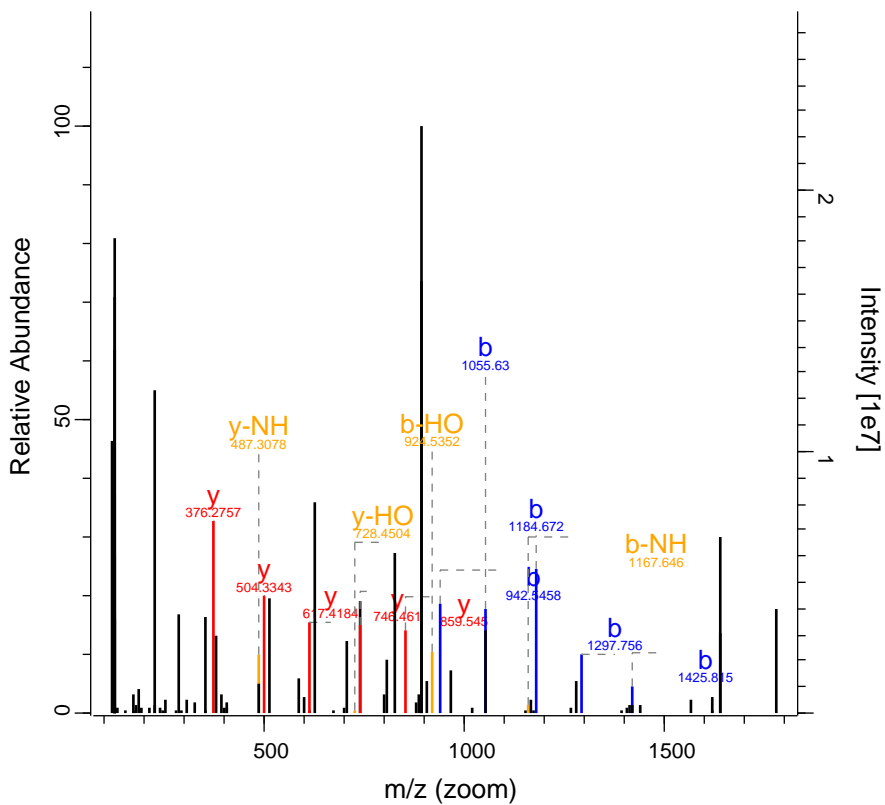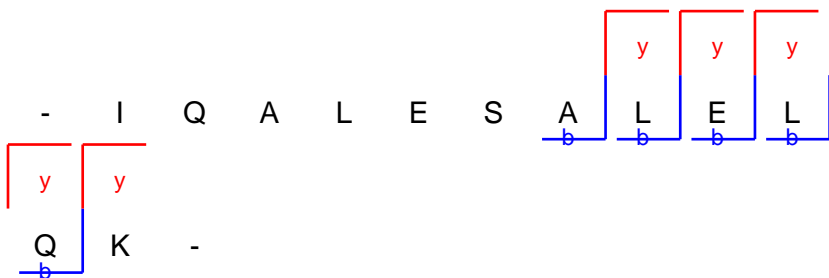

RO-QC-160121\_ZackD\_SS\_Set\_01\_Fraction 30499 FTMS; HC 72.53 821.45 LRP10

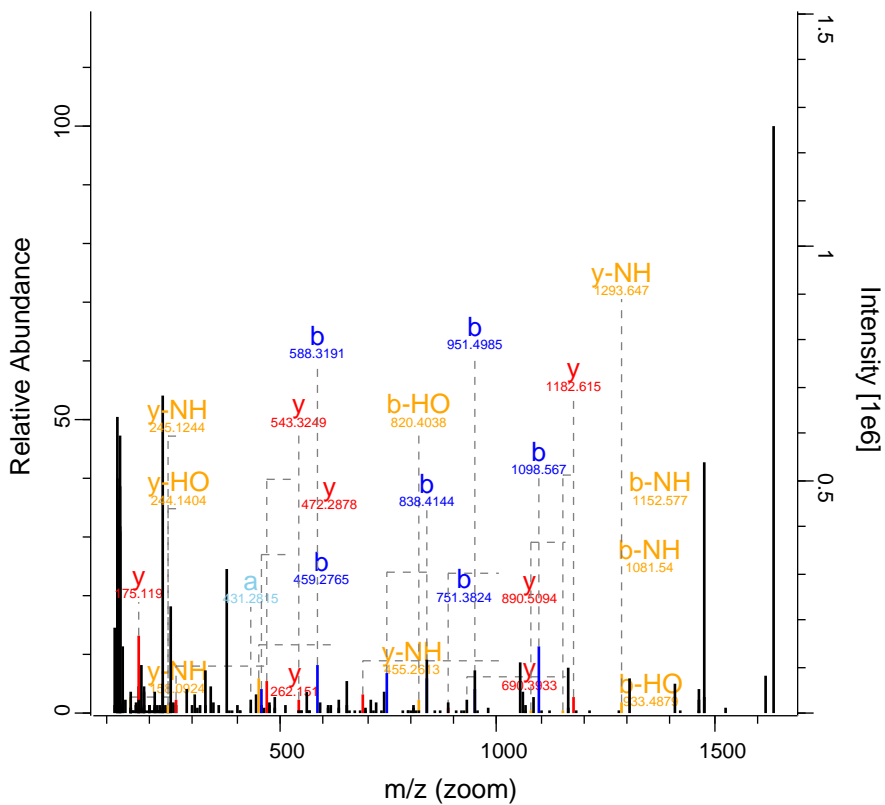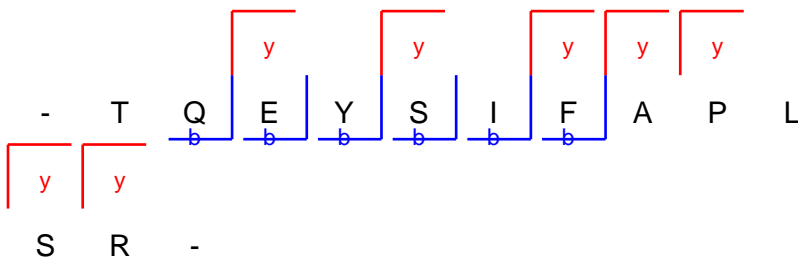

RO-QC-160121\_ZackD\_SS\_Set\_01\_Fraction 30654 FTMS; HC 64.55 601.03 FAM184B

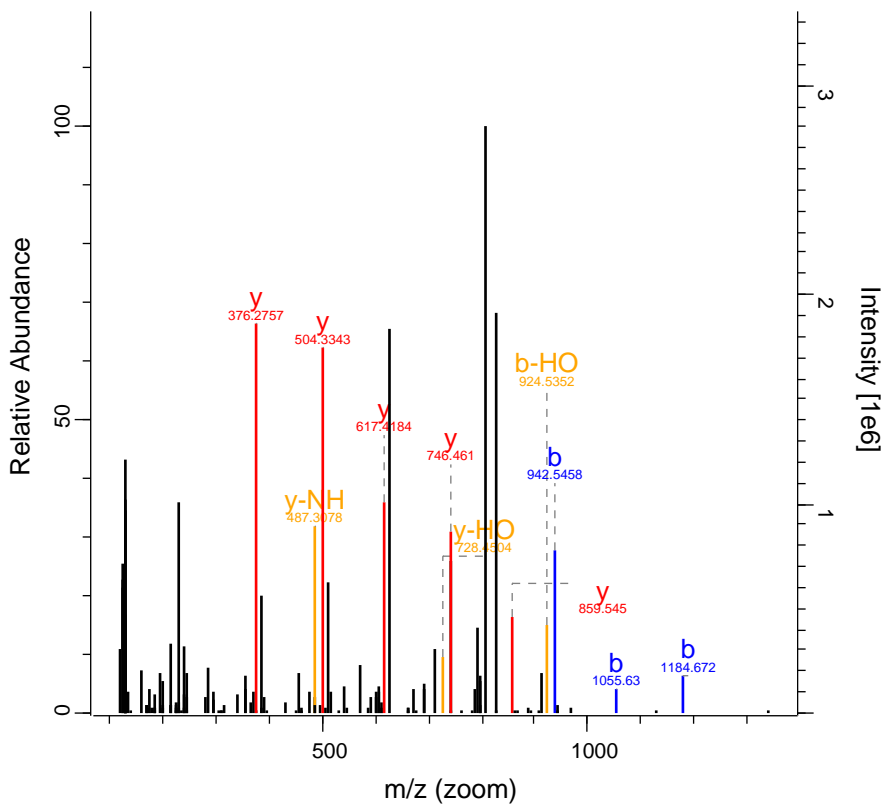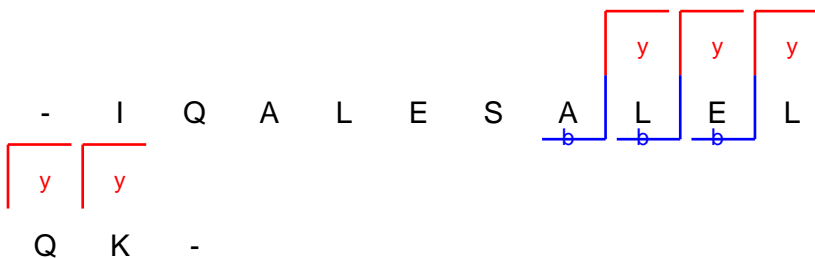

RO-QC-160121\_ZackD\_SS\_Set\_01\_Fraction 30706 FTMS; HC 48.11 758.4 EFCAB10

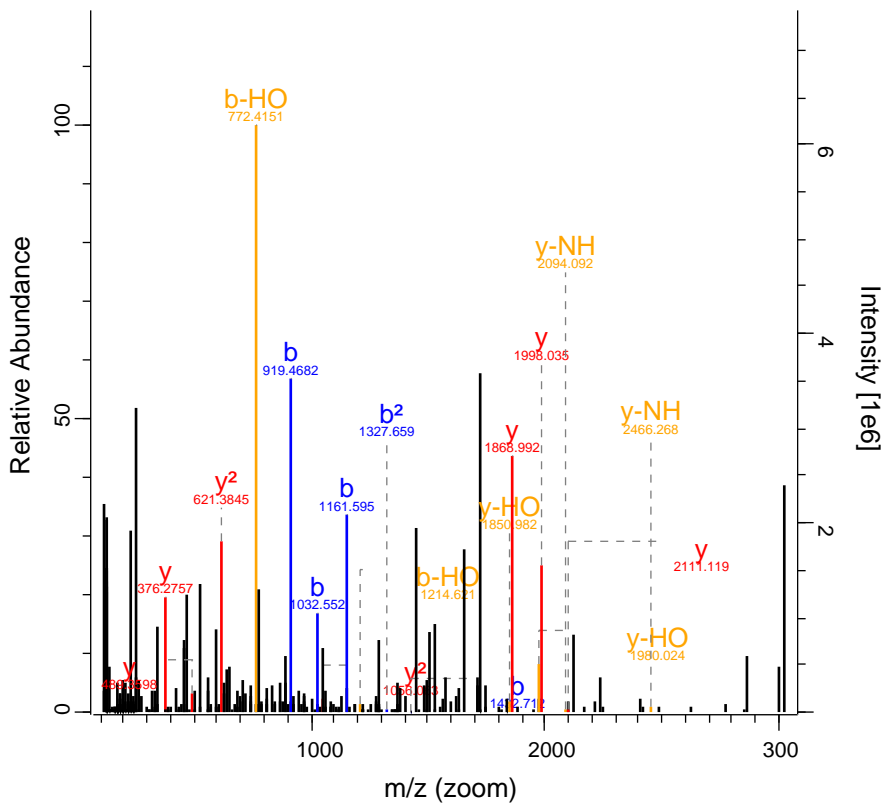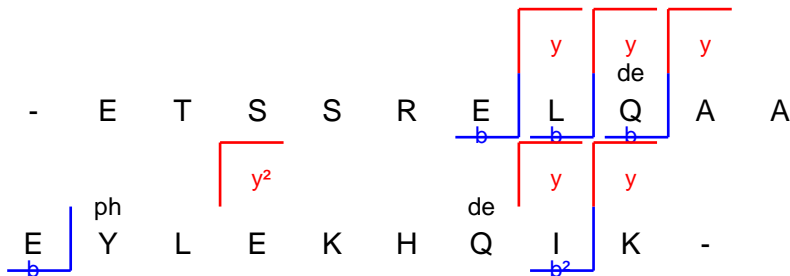

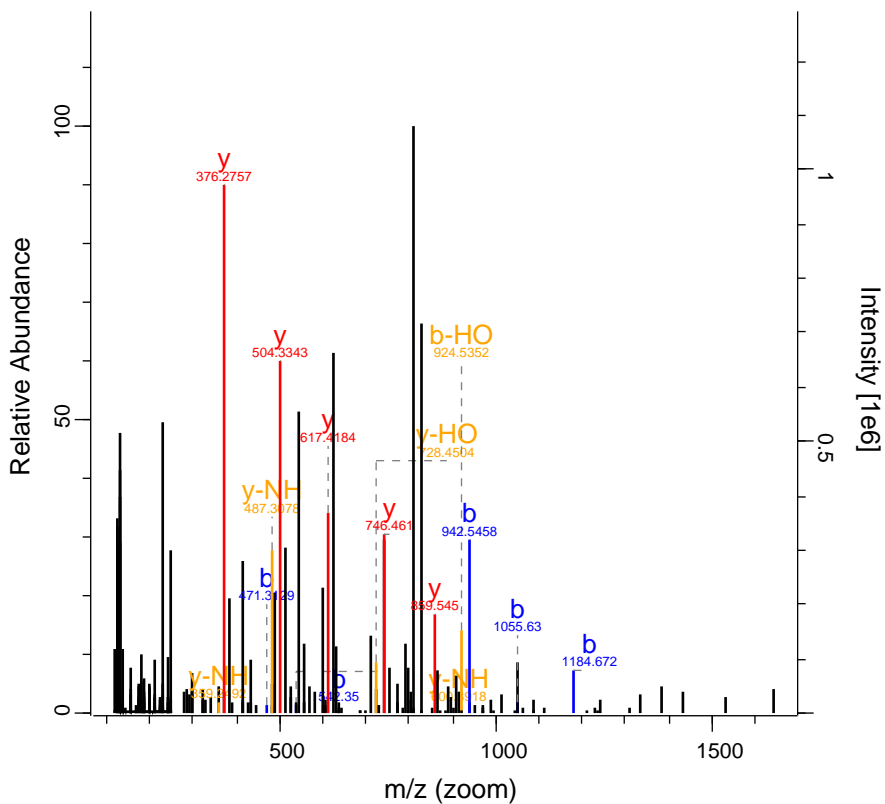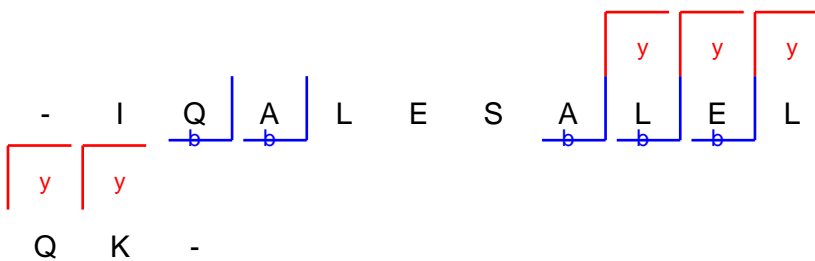



RO-QC-160121\_ZackD\_SS\_Set\_01\_Fraction 31451 FTMS; HC 66.99 657.04 SLC46A3

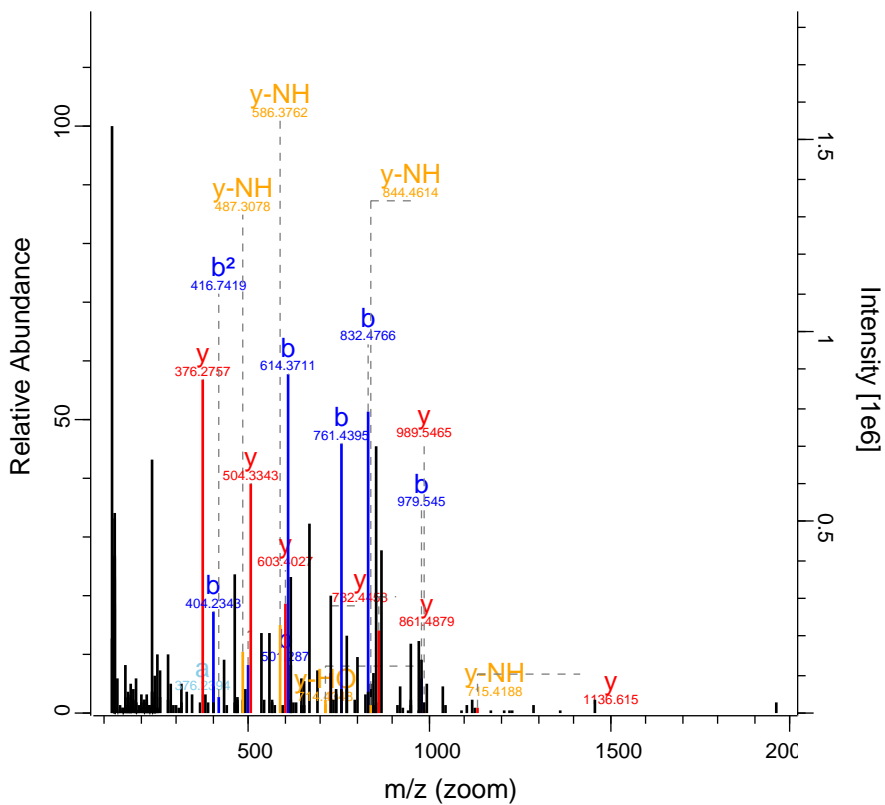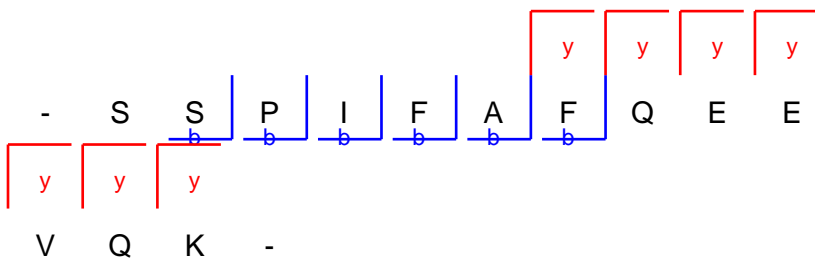

RO-QC-160121\_ZackD\_SS\_Set\_01\_Fraction1 31476 FTMS; HC 110.66 985.05 SLC46A3

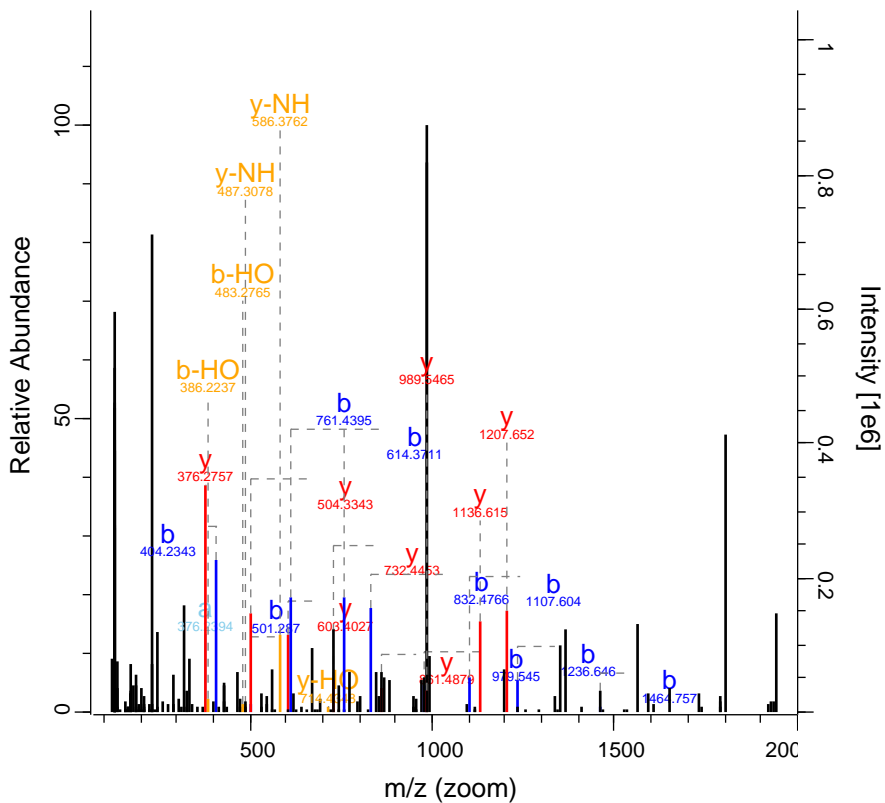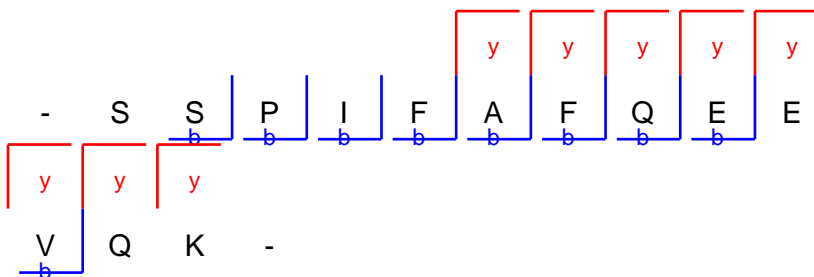



Raw File

Scan Method Score m/z

RO-QC-160121\_ZackD\_SS\_Set\_01\_Fraction\_12

31610 FTMS; HCD 141.47 701.93

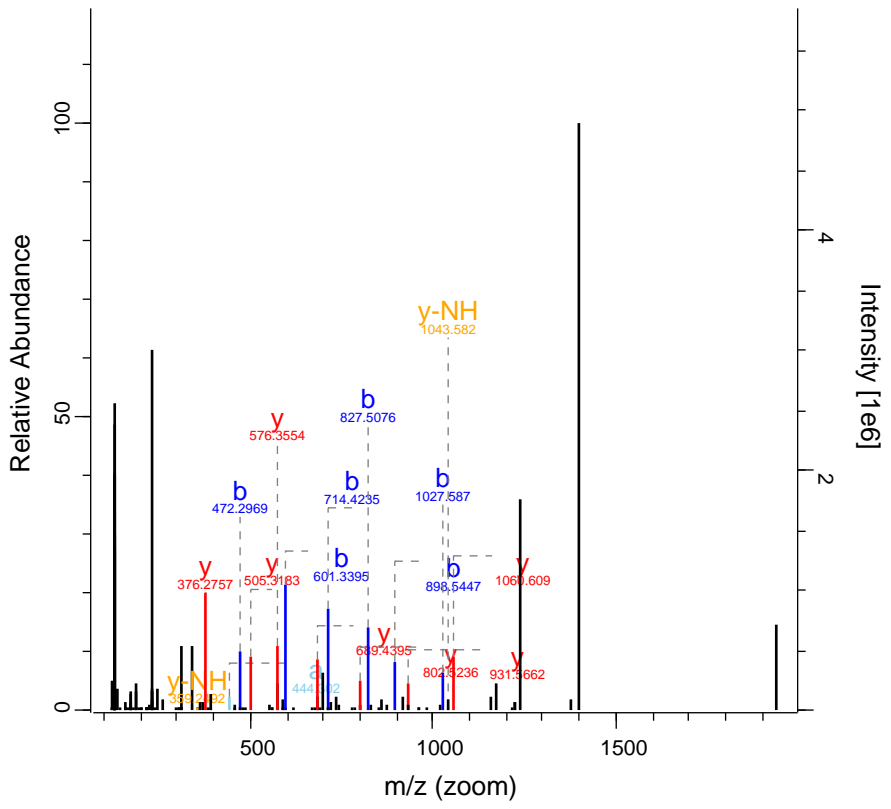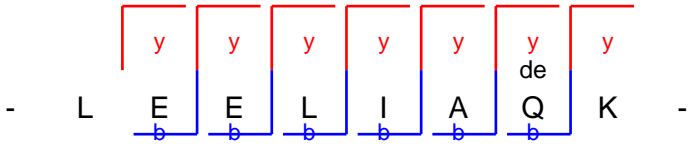



RO-QC-160121\_ZackD\_SS\_Set\_01\_Fraction 31689 FTMS; HC 123.67 985.05 SLC46A3

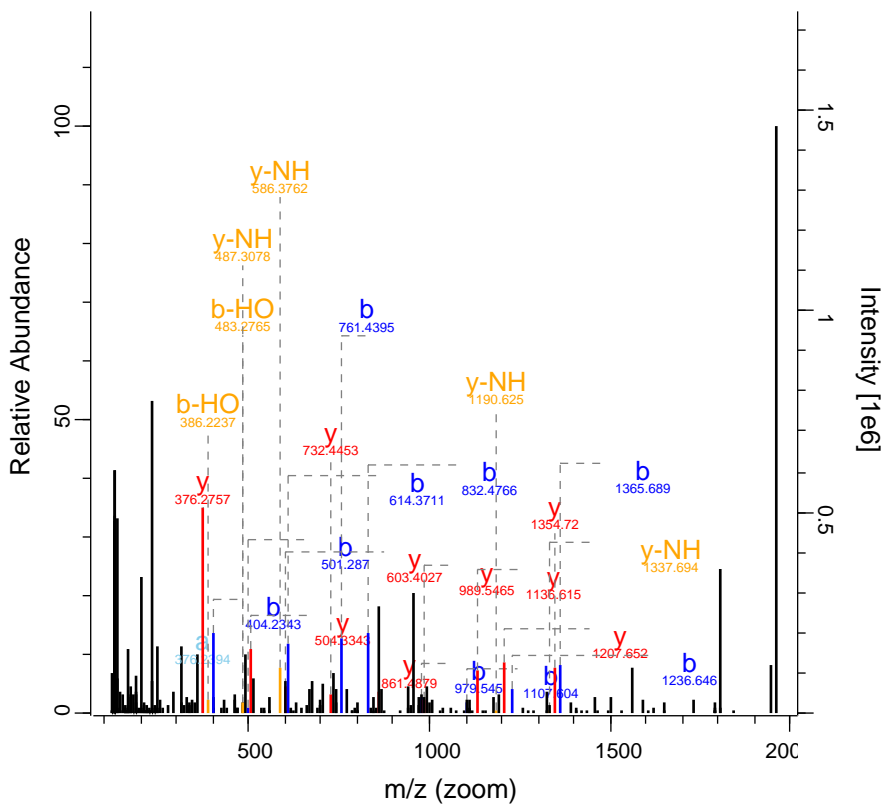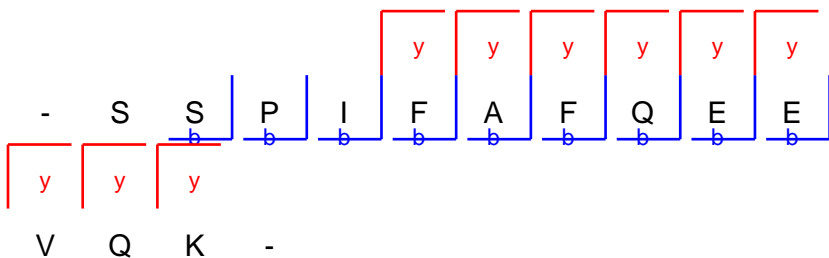

RO-QC-160121\_ZackD\_SS\_Set\_01\_Fraction1 31733 FTMS; HC 114.84 715.46 HAUS2

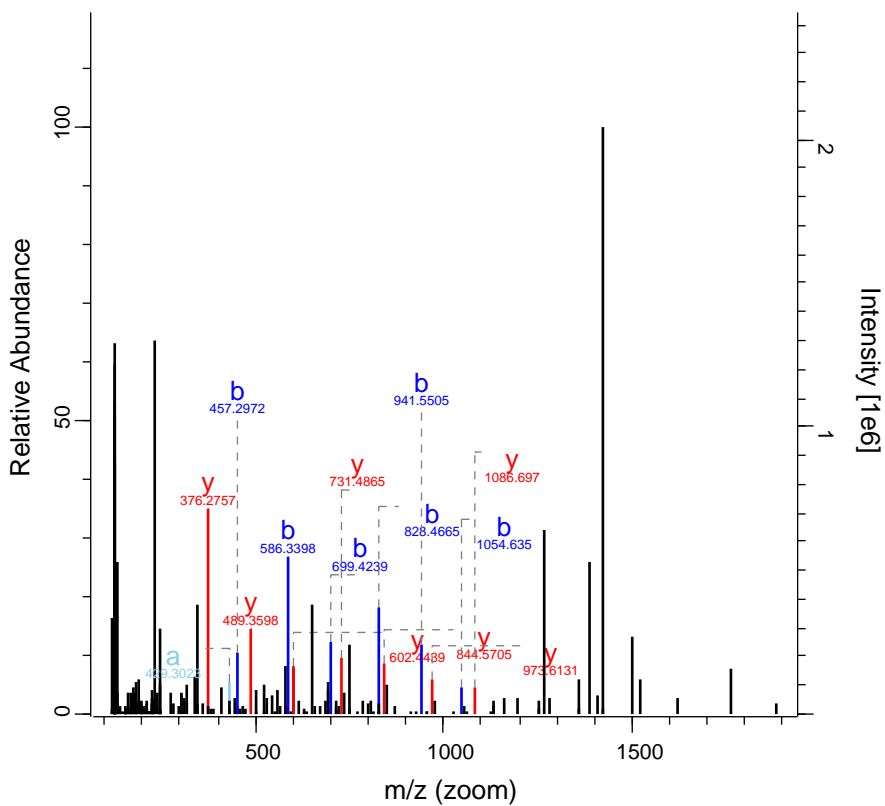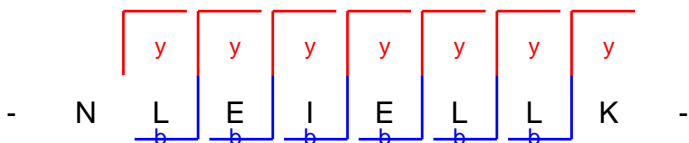





RO-QC-160121\_ZackD\_SS\_Set\_01\_Fraction 34363 FTMS; HC 51.77 570.3 POP5

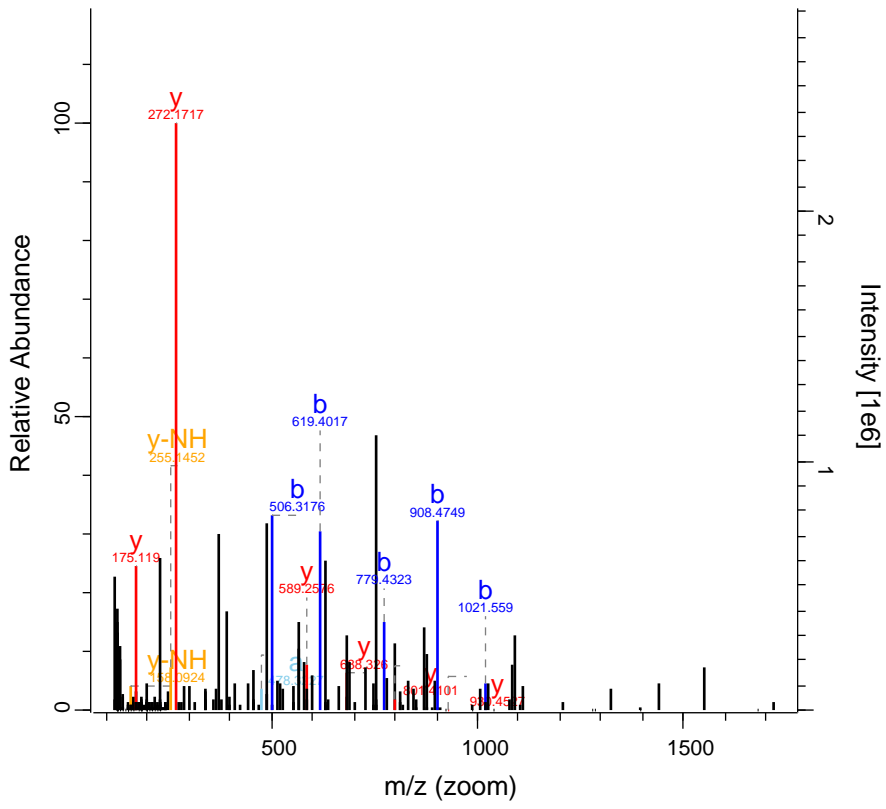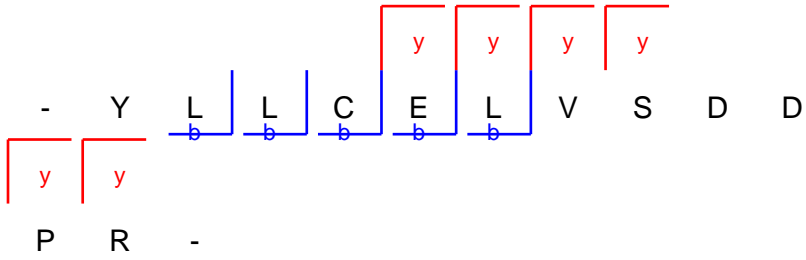

P R -

RO-QC-160121\_ZackD\_SS\_Set\_01\_Fraction 34454 FTMS; HC 91.85 854.94 POP5

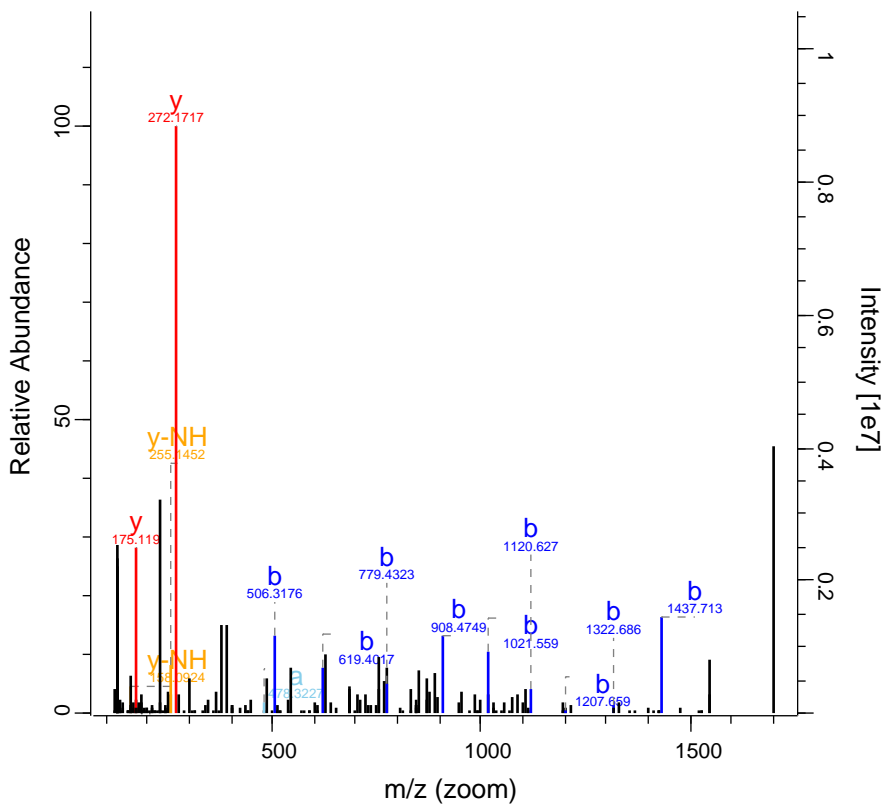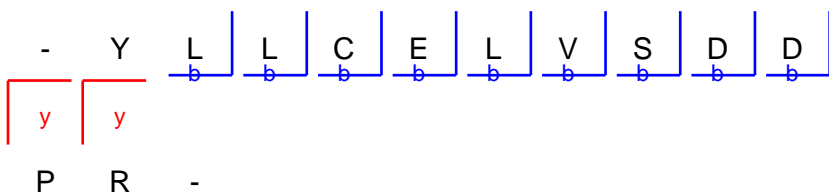



RO-QC-160121\_ZackD\_SS\_Set\_01\_Fraction 35367 FTMS; HC 113.29 645.7 METRN

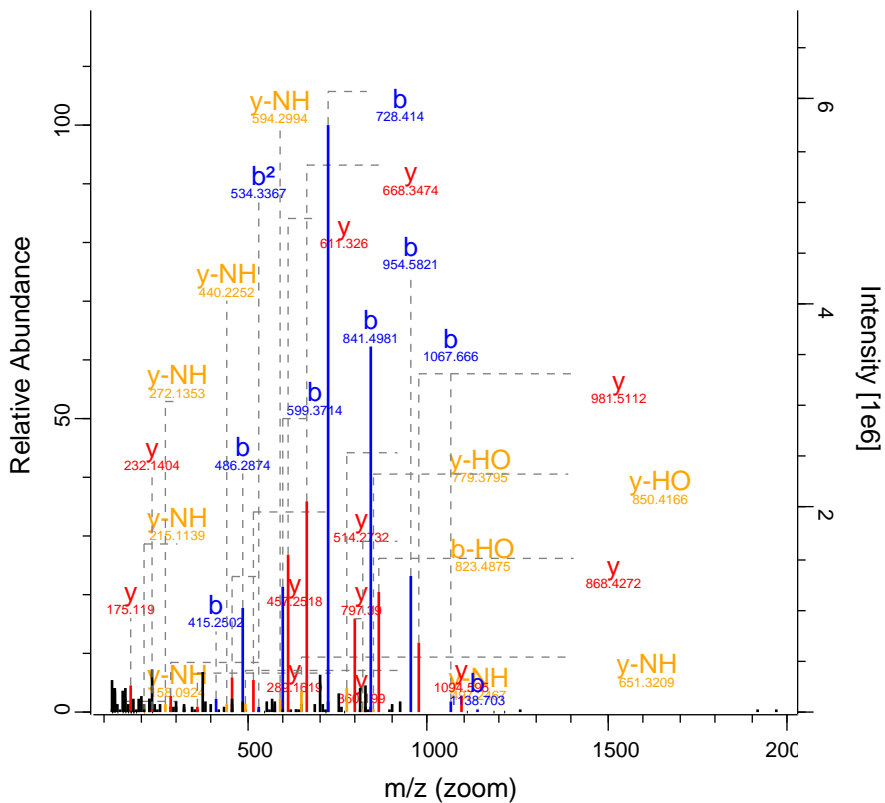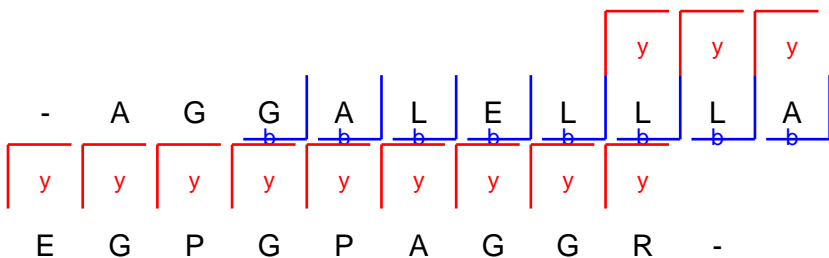

E G P G P A G G R -



RO-QC-160121\_ZackD\_SS\_Set\_01\_Fraction 35769 FTMS; HC 48.82 600.1 HMGXB3

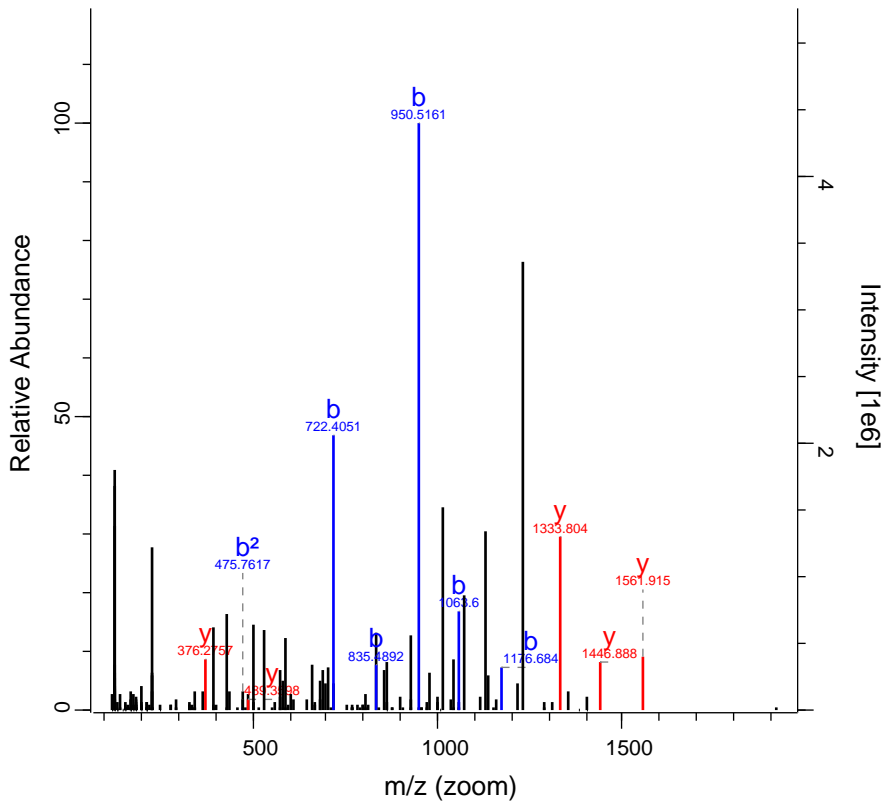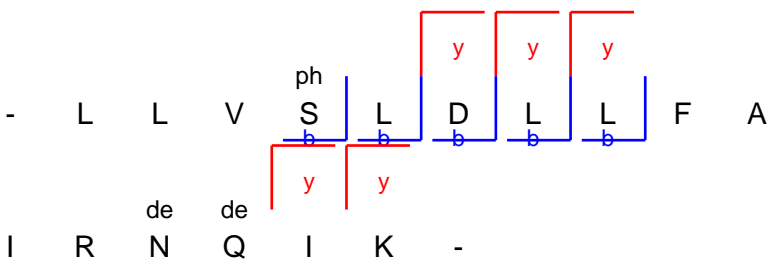

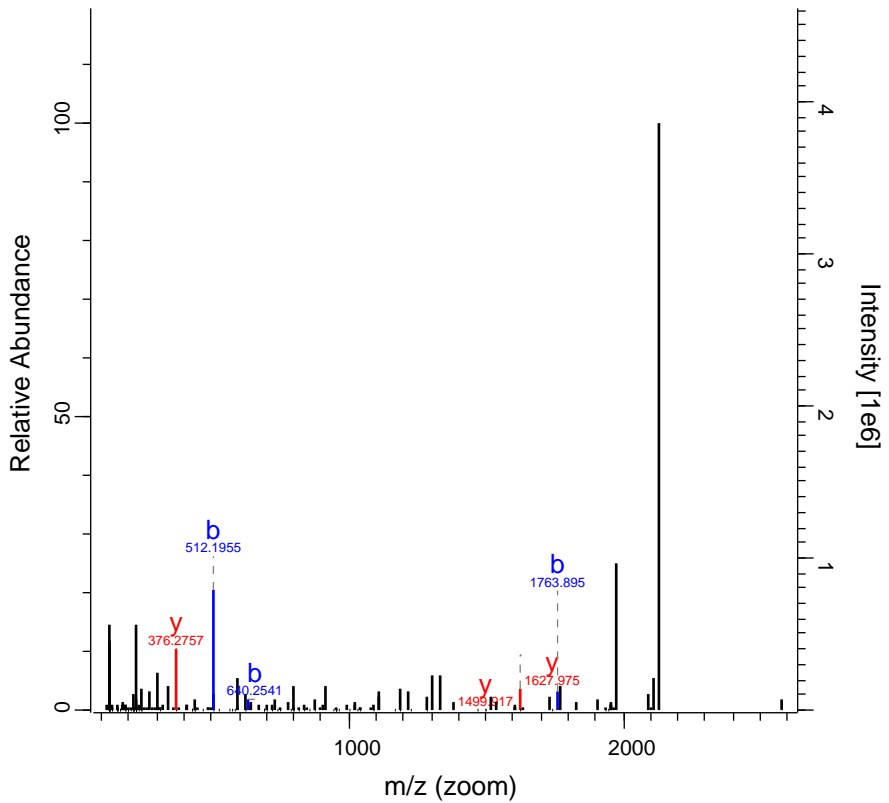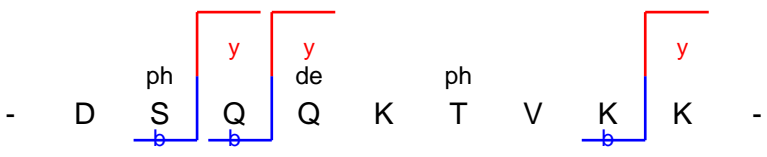

RO-QC-160121\_ZackD\_SS\_Set\_01\_Fraction 36473 FTMS; HC 48.63 842.76 CCDC108

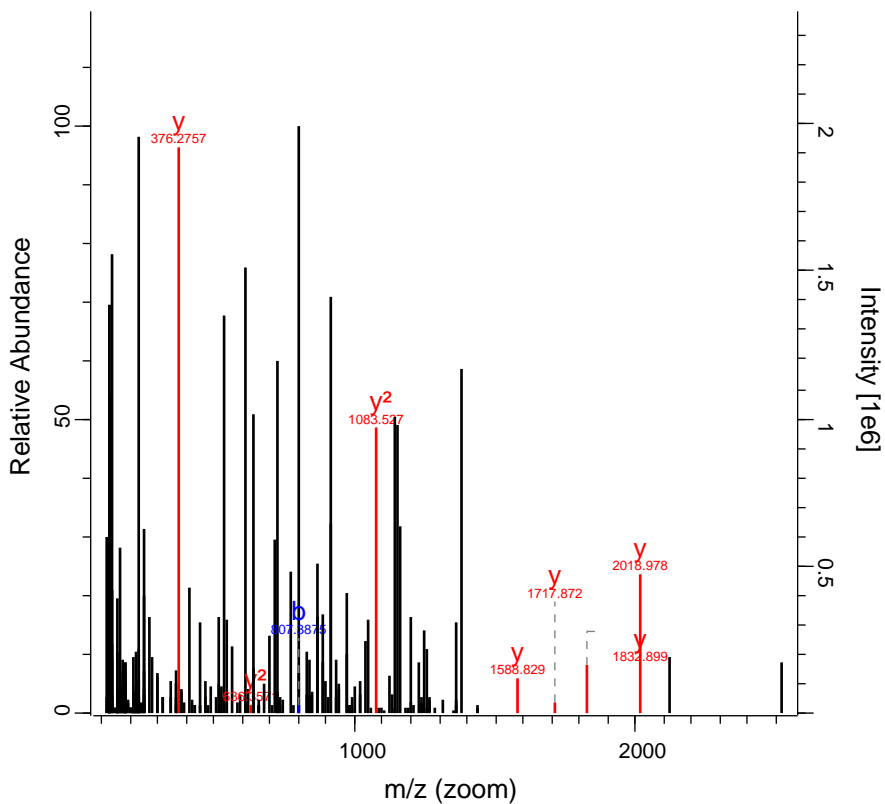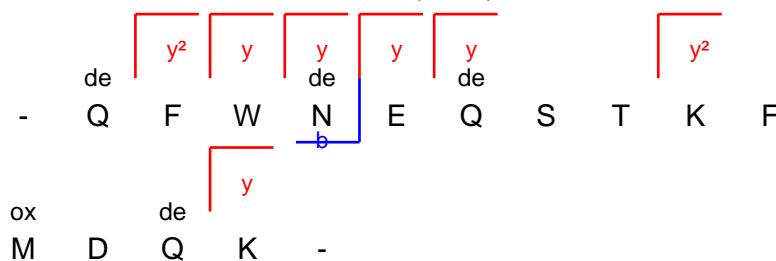

RO-QC-160121\_ZackD\_SS\_Set\_01\_Fraction 36922 FTMS; HC 97.06 1066.52 MT-CO1

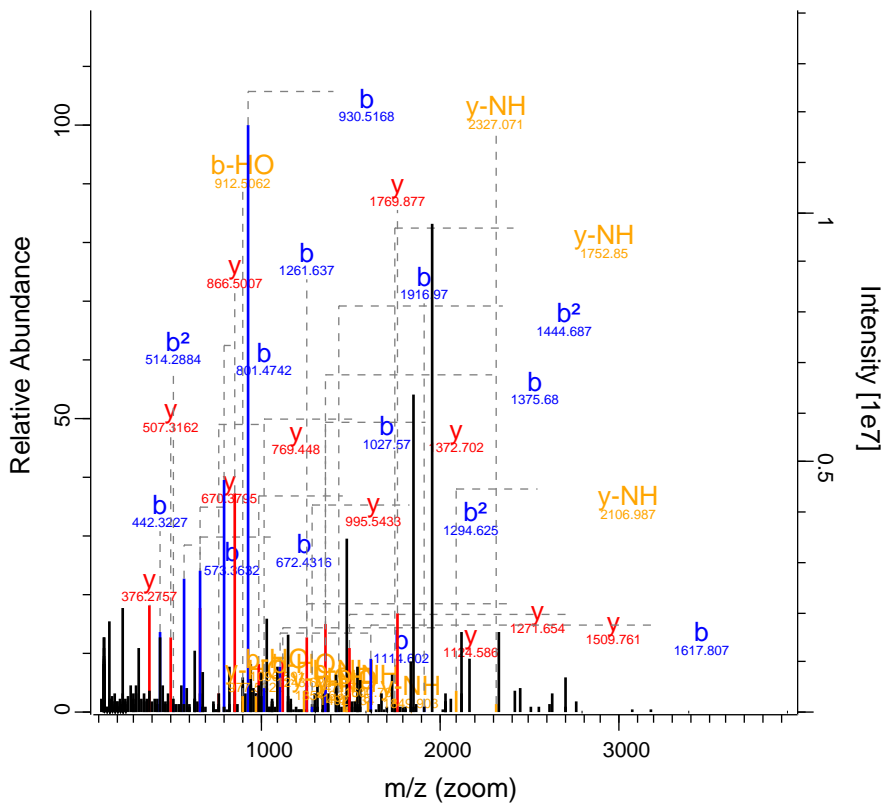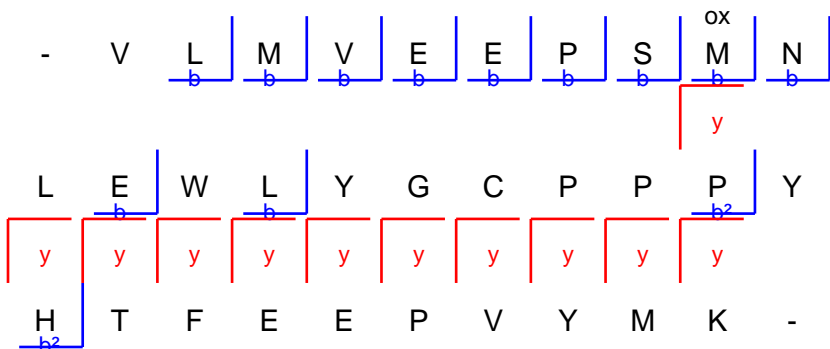



RO-QC-160121\_ZackD\_SS\_Set\_01\_Fraction 37324 FTMS; HC 120.77 717.7 DEGS1

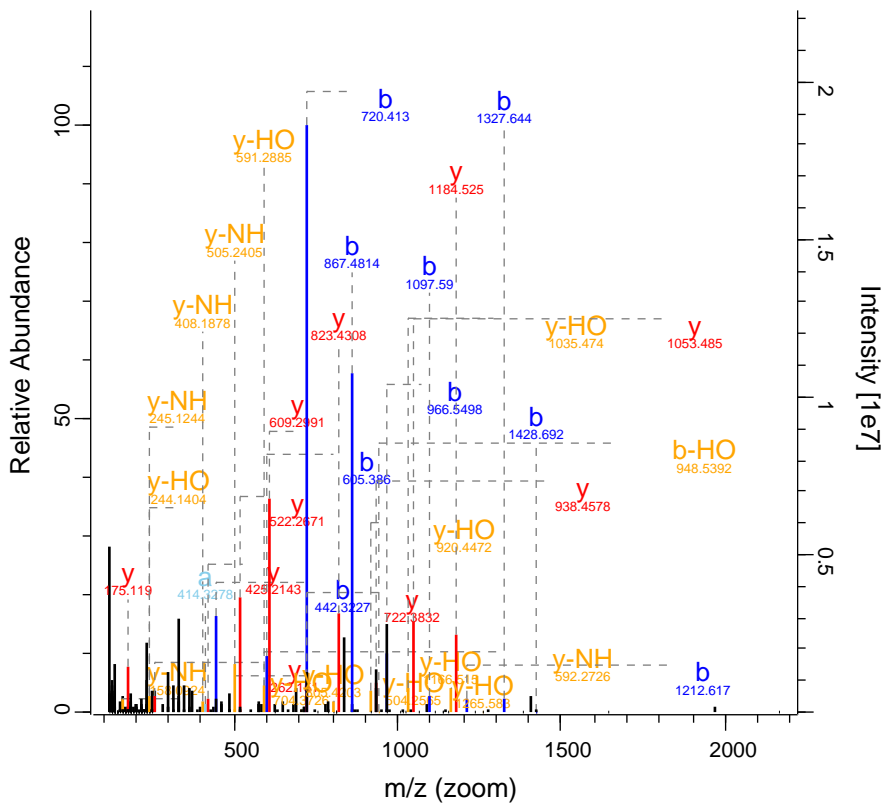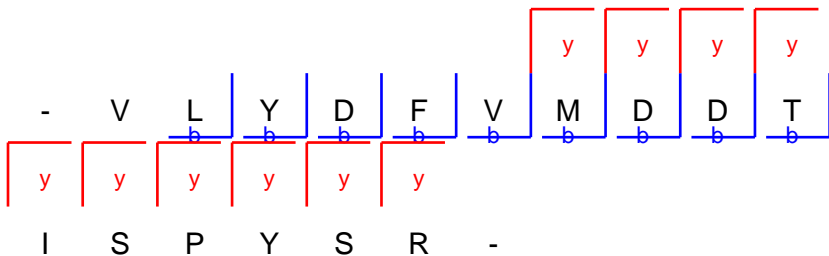



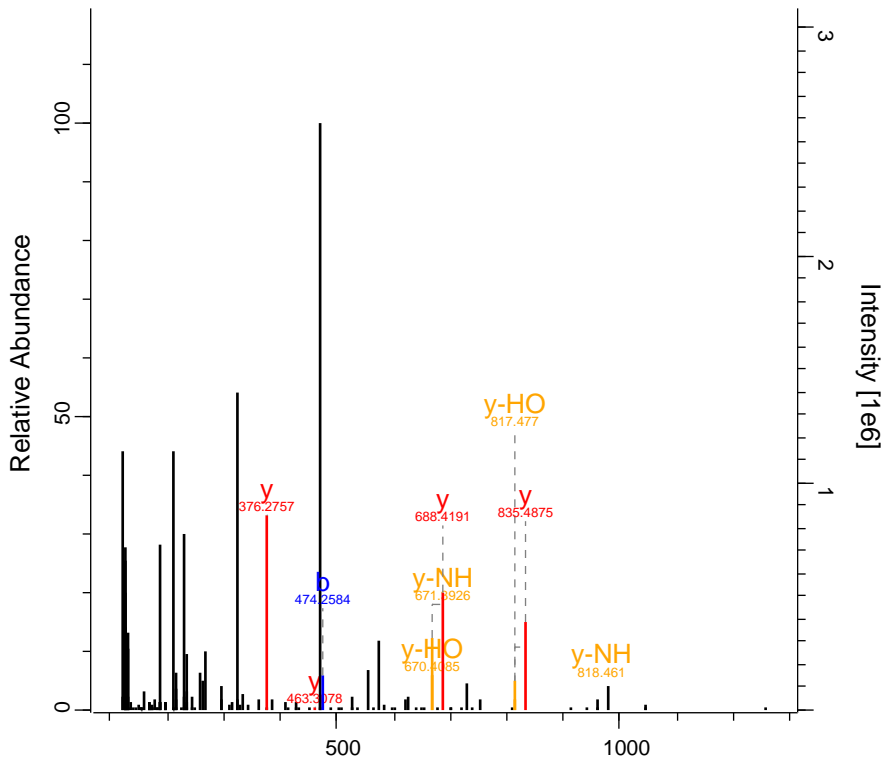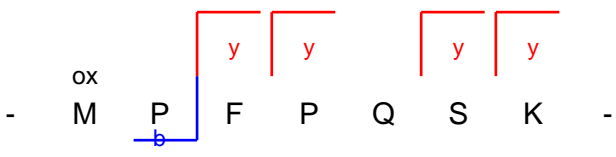

RO-QC-160121\_ZackD\_SS\_Set\_01\_Fraction 38007 FTMS; HC 158.79 993.02 TOMM7

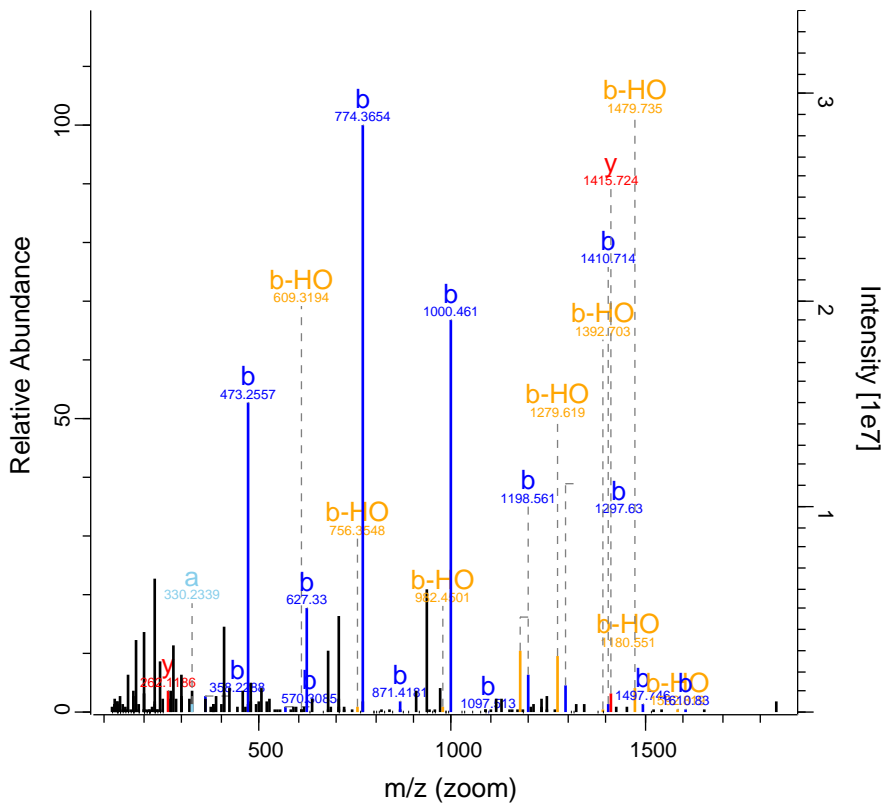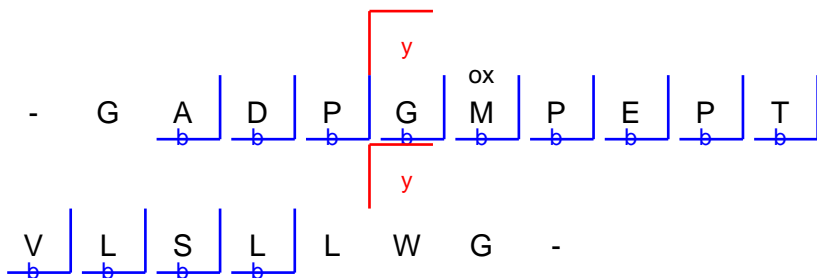

RO-QC-160121\_ZackD\_SS\_Set\_01\_Fraction 38010 FTMS; HC 54.7 662.35 TOMM7

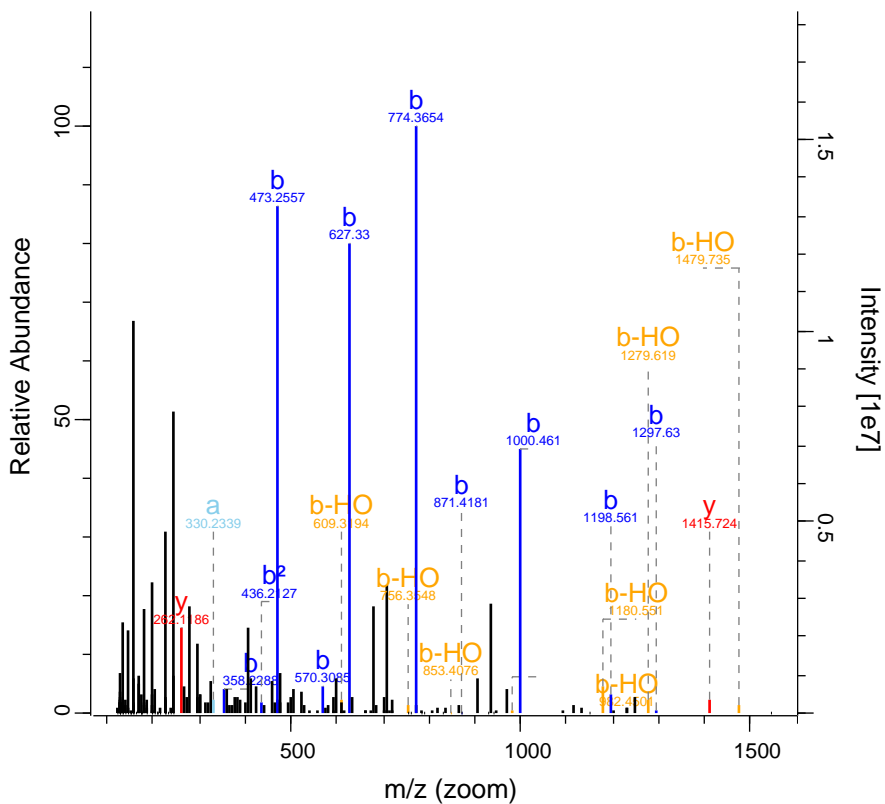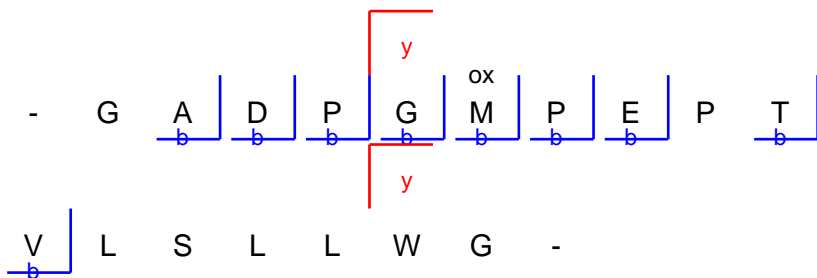



RO-QC-160121\_ZackD\_SS\_Set\_01\_Fraction 38298 FTMS; HC 77.42 1260.17 BSCL2

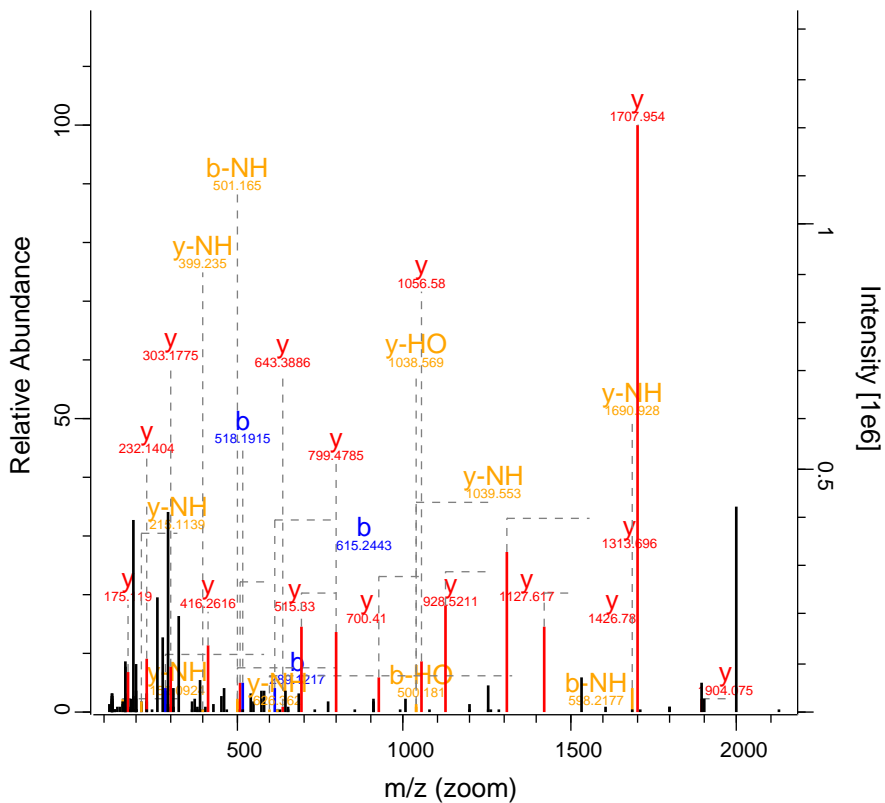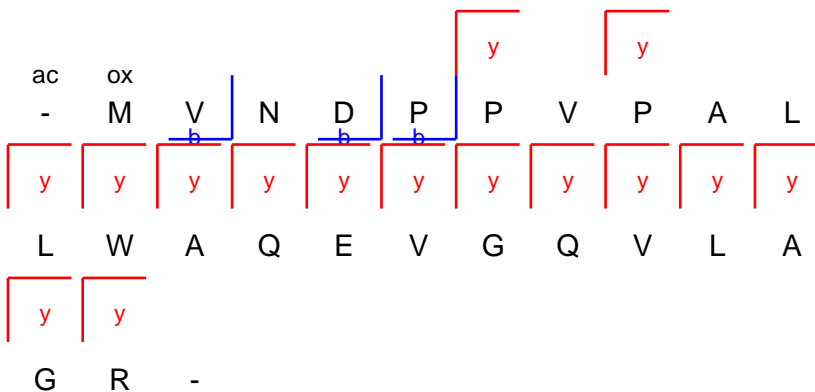

RO-QC-160121\_ZackD\_SS\_Set\_02\_Fraction 4873 FTMS; HCl 49.42 638.31 BARD1

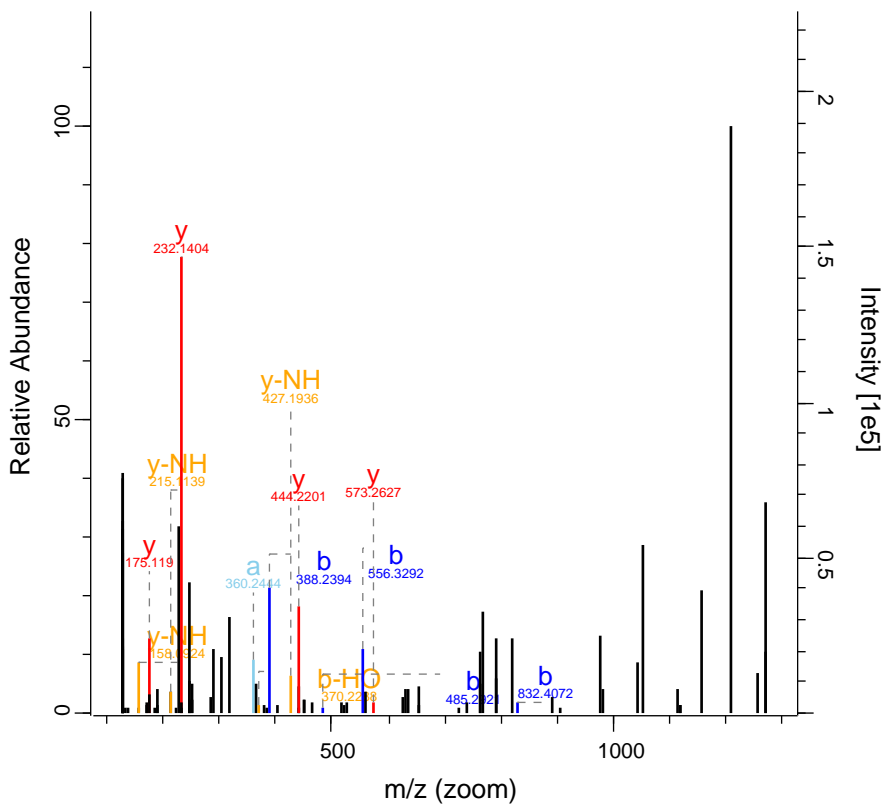

m/z (zoom)

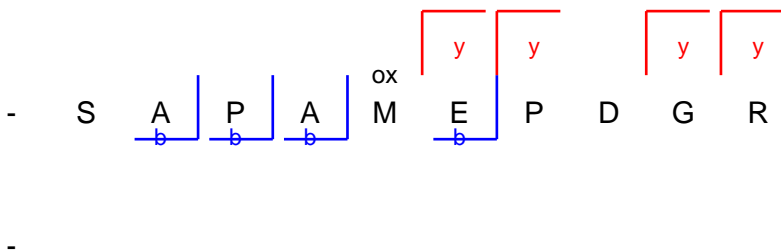

RO-QC-160121\_ZackD\_SS\_Set\_02\_Fraction 5111 FTMS; HC 112.01 669.83 TMEM47

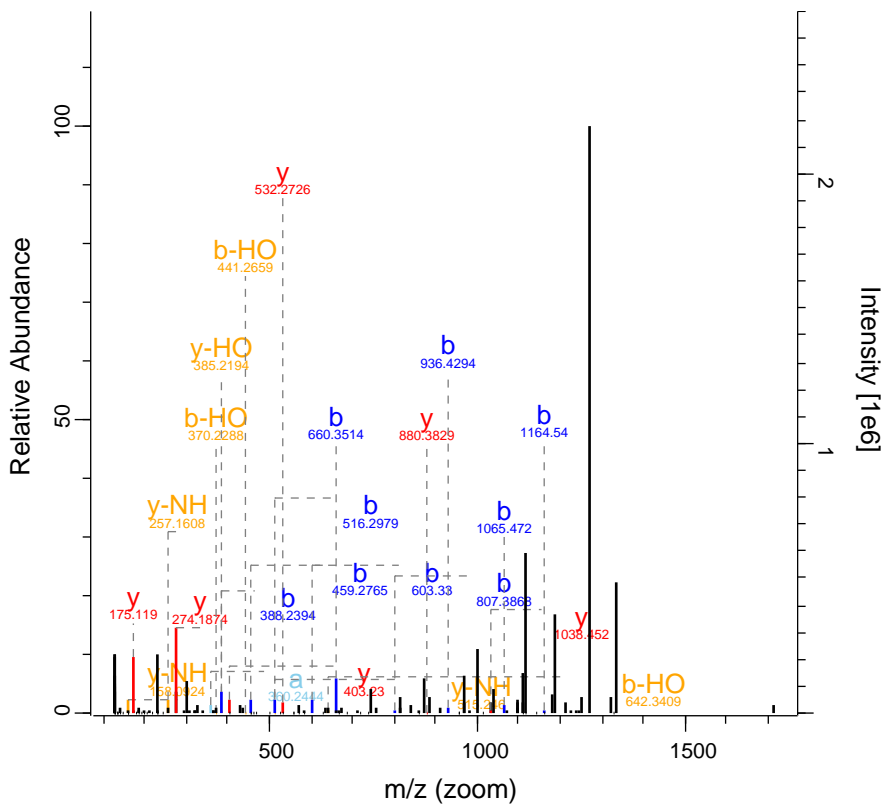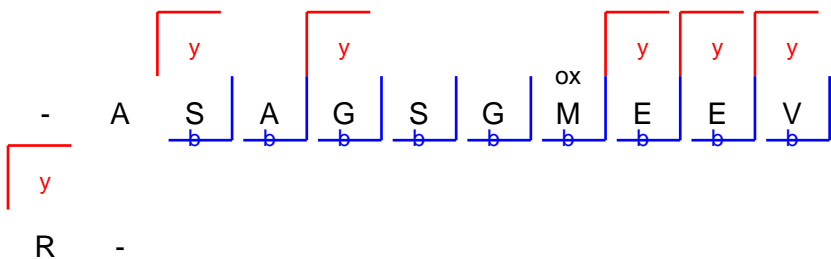

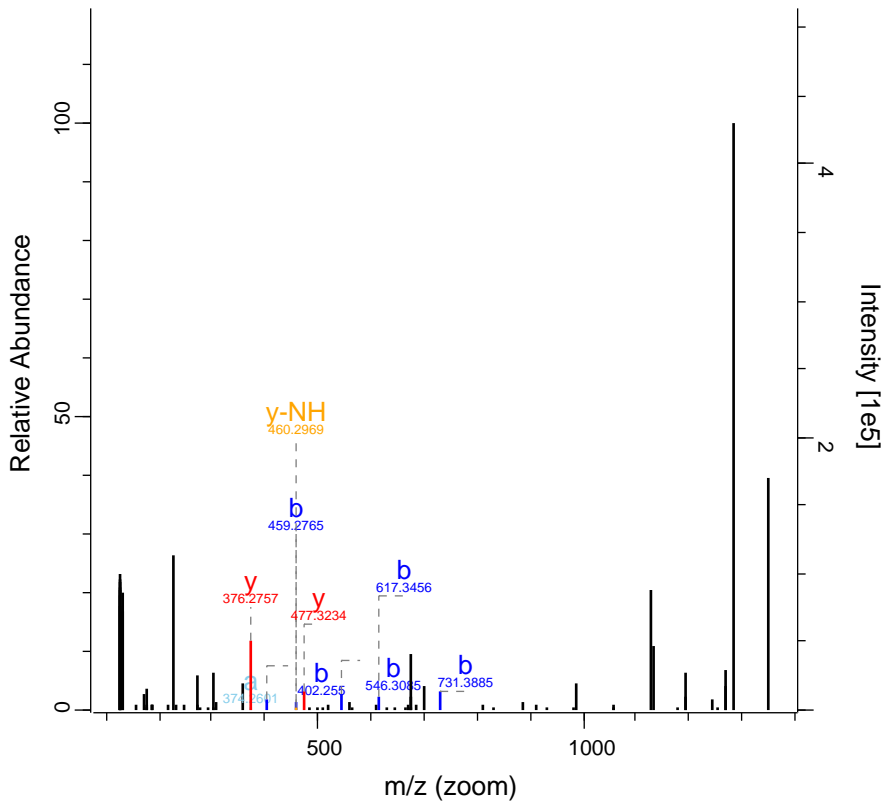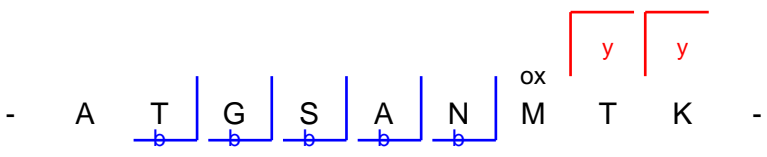





RO-QC-160121\_ZackD\_SS\_Set\_02\_Fraction 5330 FTMS; HC 116.01 519.04 ZNF518B

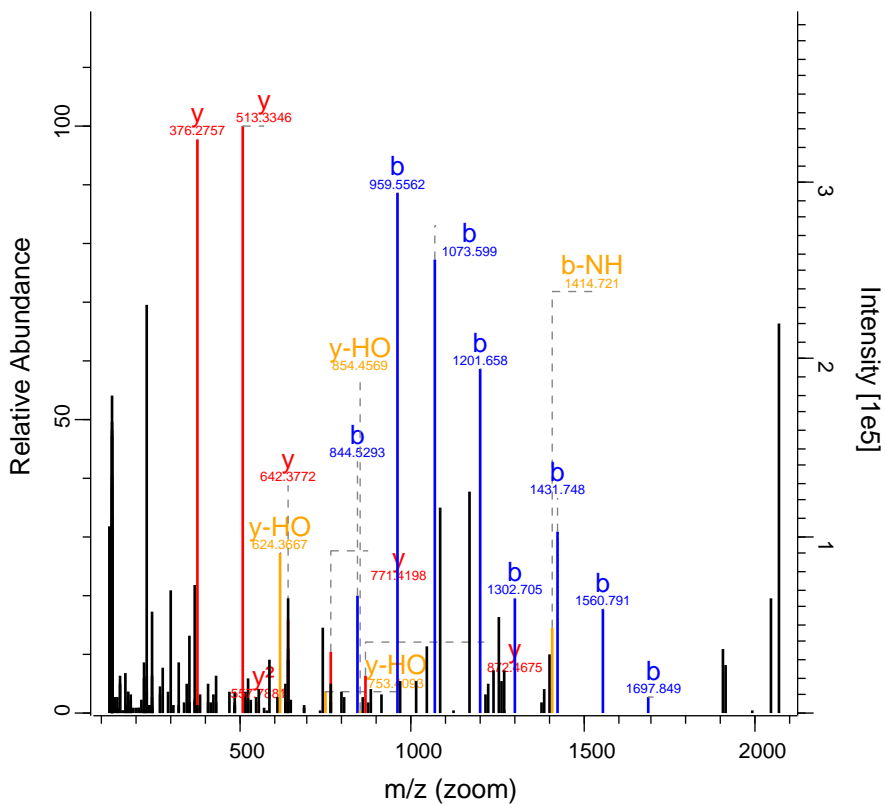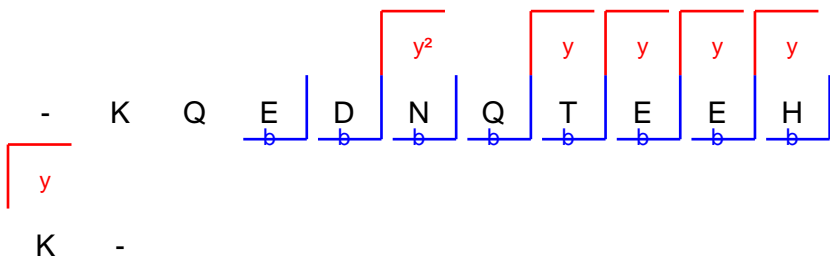

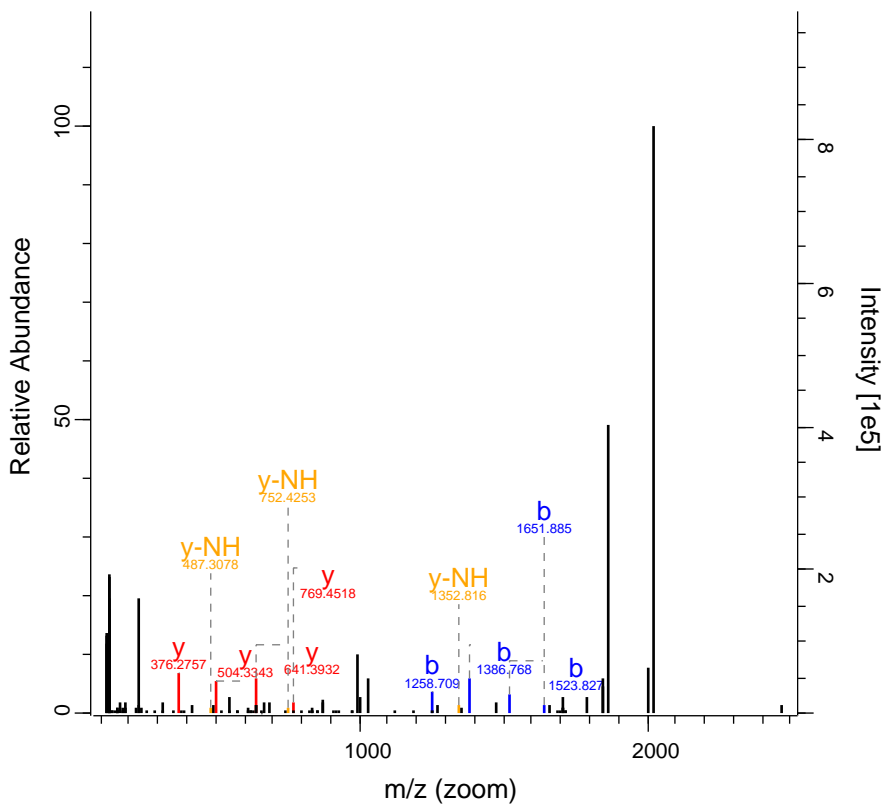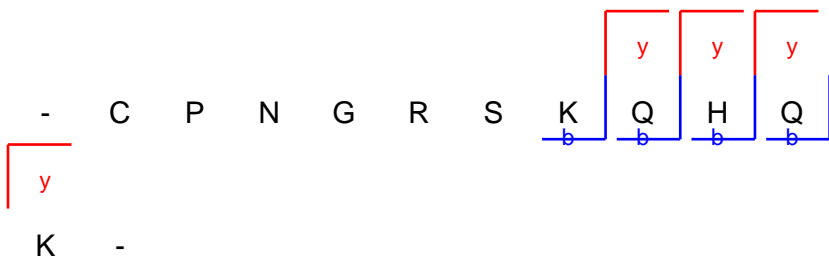

RO-QC-160121\_ZackD\_SS\_Set\_02\_Fraction 5707 FTMS; HCl 103.83 575.8 GPAM

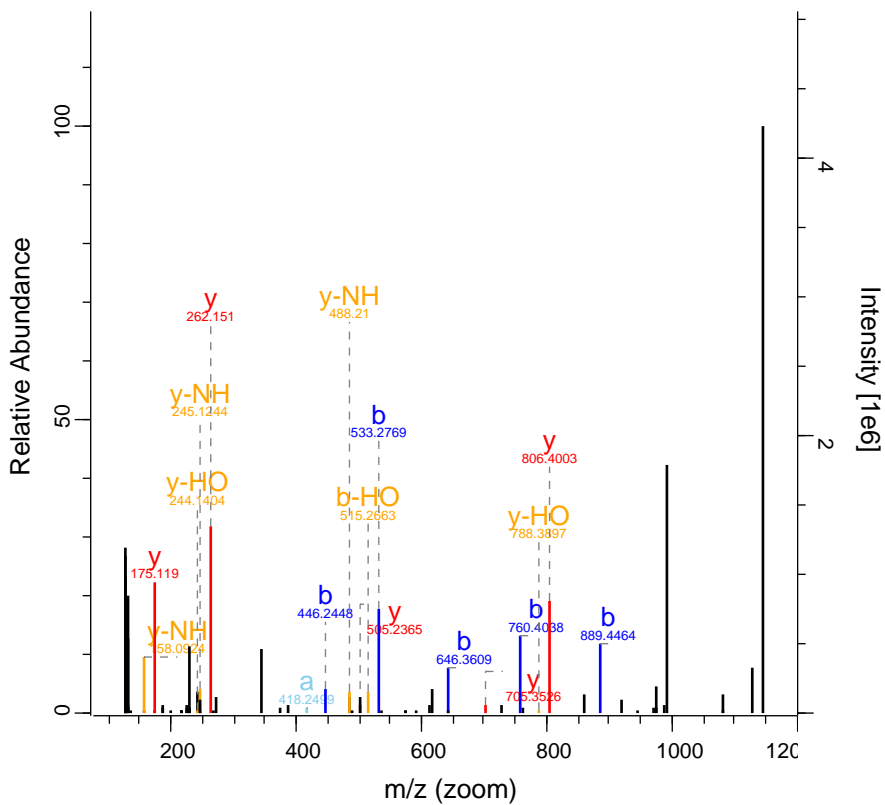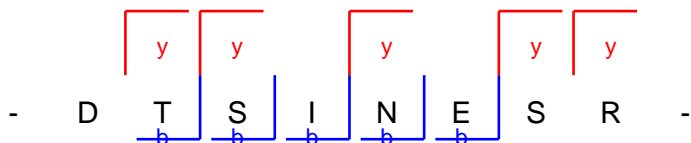

RO-QC-160121\_ZackD\_SS\_Set\_02\_Fraction 6493 FTMS; HCl98.03 702.89 TRMT12

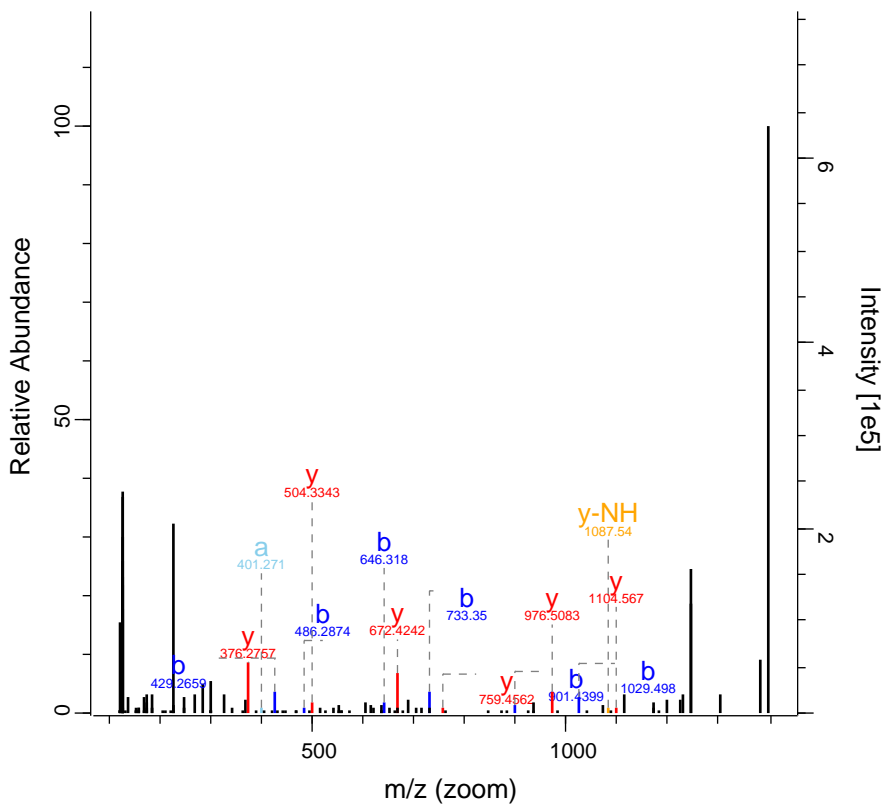

m/z (zoom)

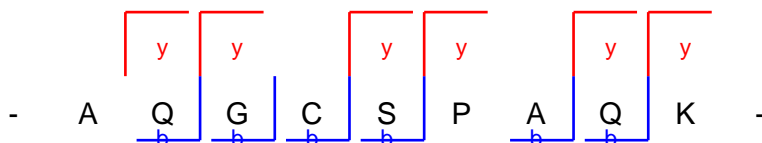

RO-QC-160121\_ZackD\_SS\_Set\_02\_Fraction 6608 FTMS; HC 223.14 778.93 TTC39B

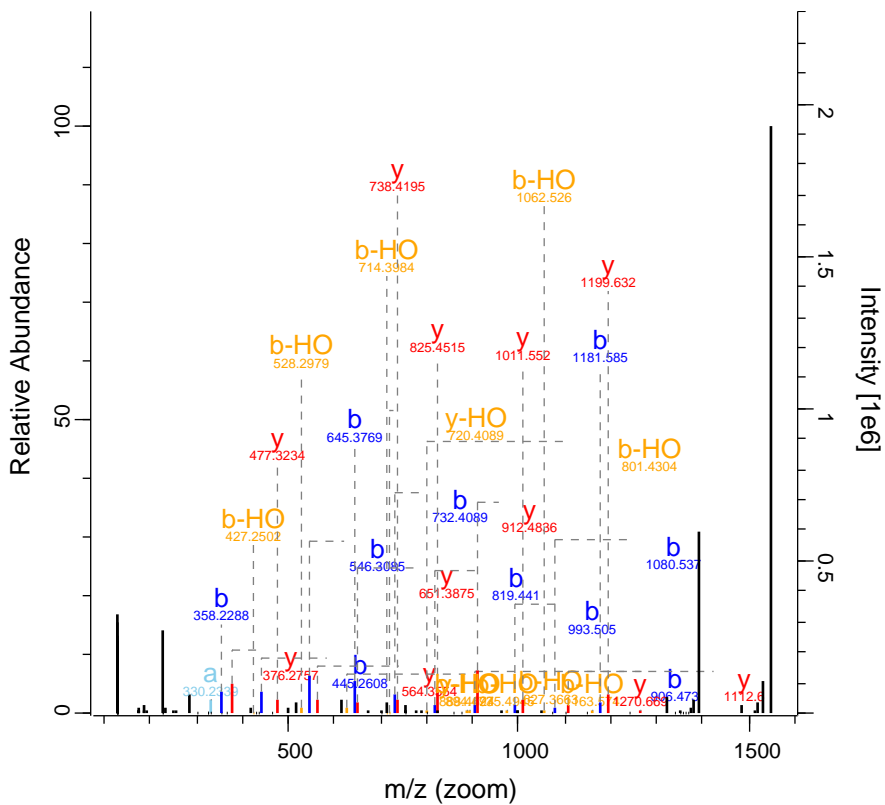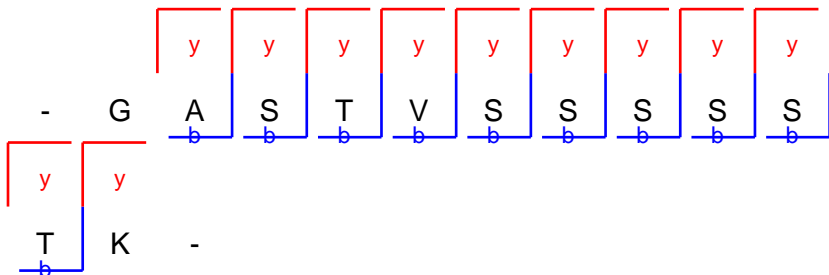

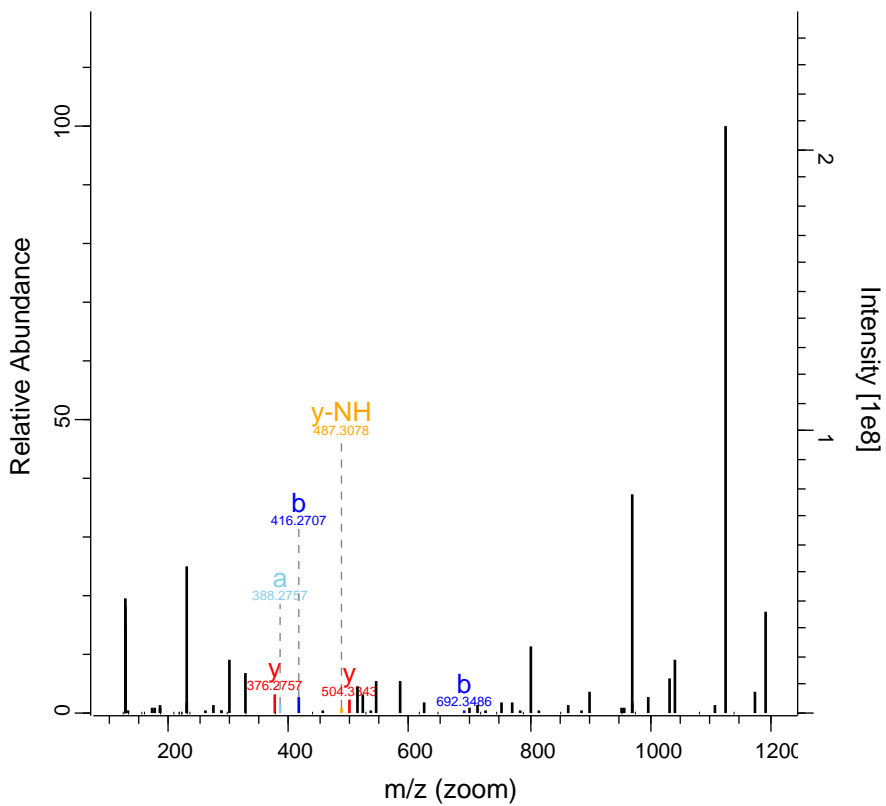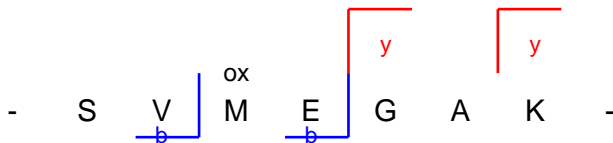

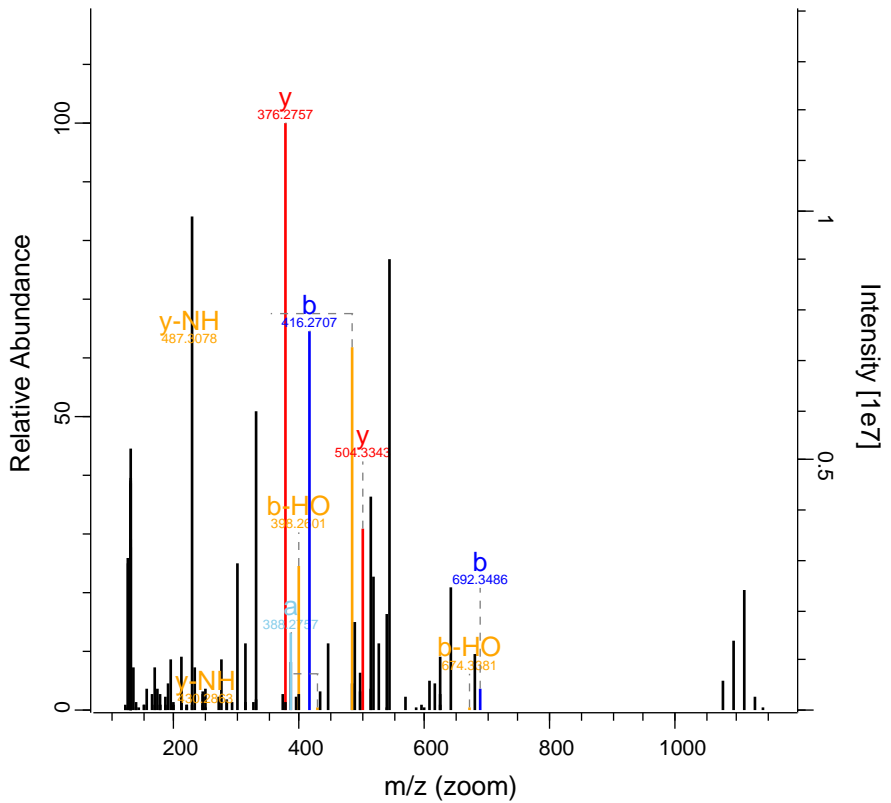



RO-QC-160121\_ZackD\_SS\_Set\_02\_Fraction 7122 FTMS; HC 104.44 426.53 SHISA8

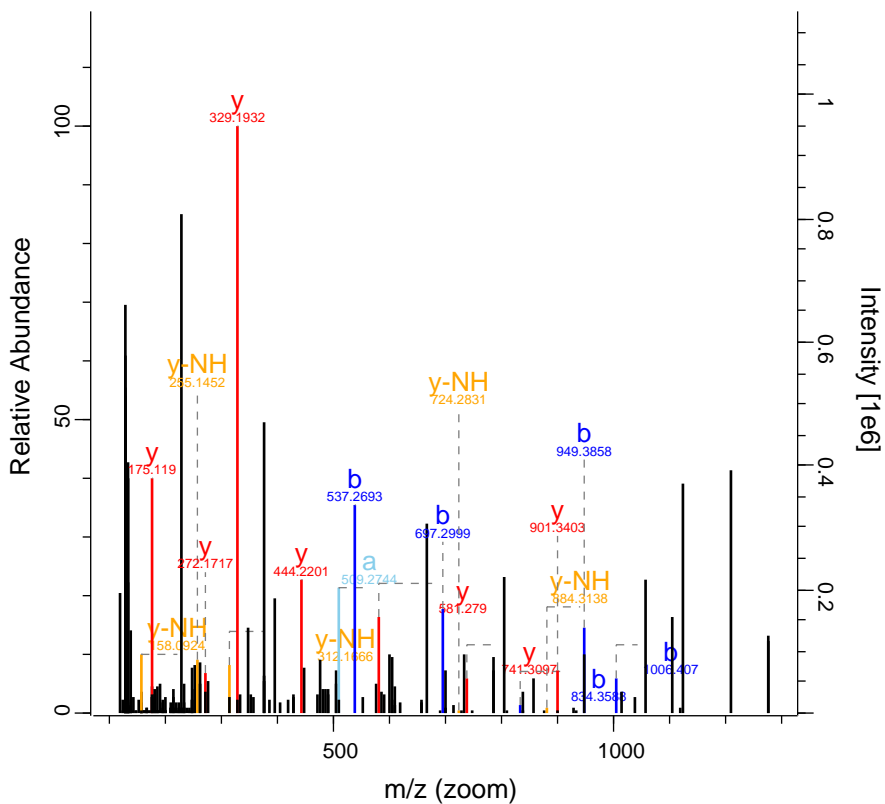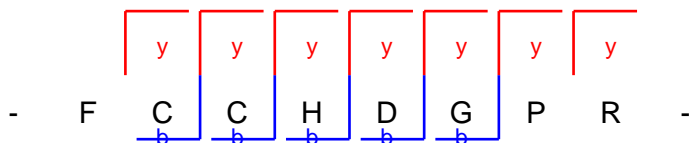

RO-QC-160121\_ZackD\_SS\_Set\_02\_Fraction 7266 FTMS; HCl 79.91 456.94 TCTN2

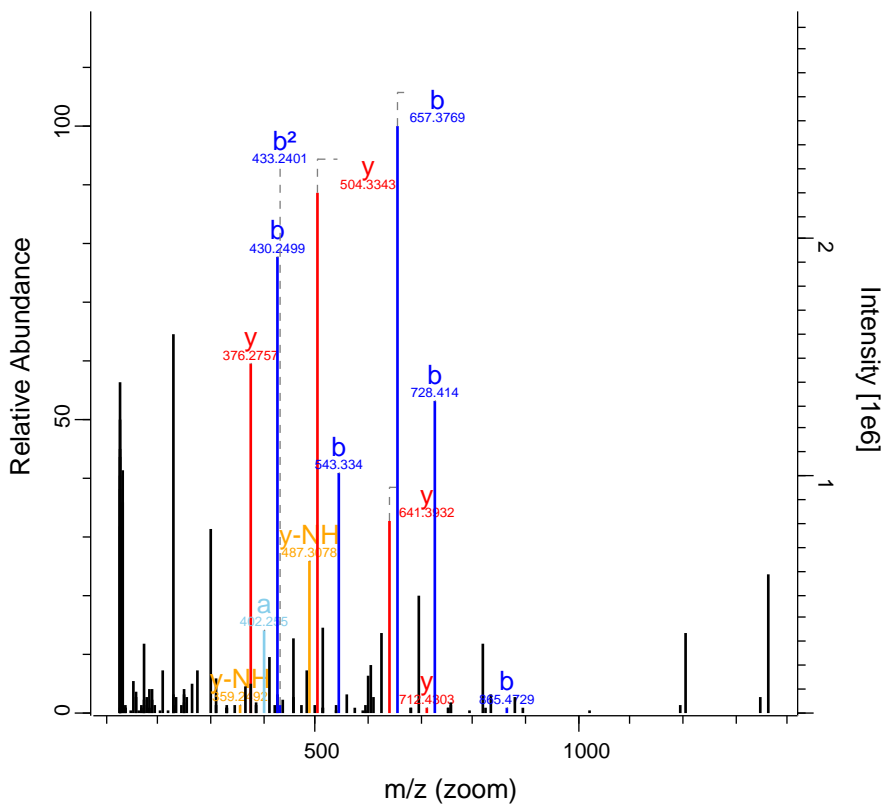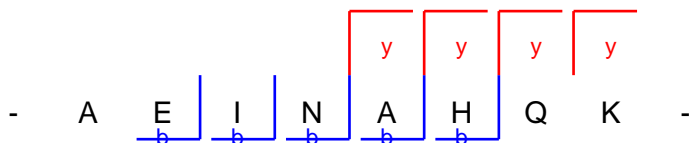

RO-QC-160121\_ZackD\_SS\_Set\_02\_Fraction 7444 FTMS; HCl 94.09 717.05 PCGF5

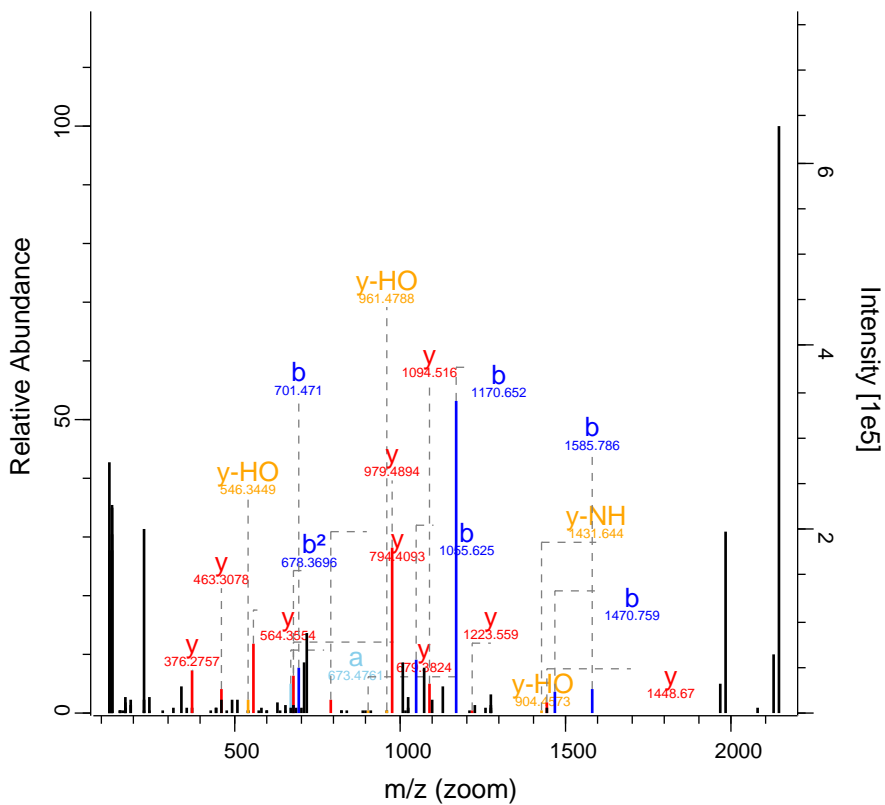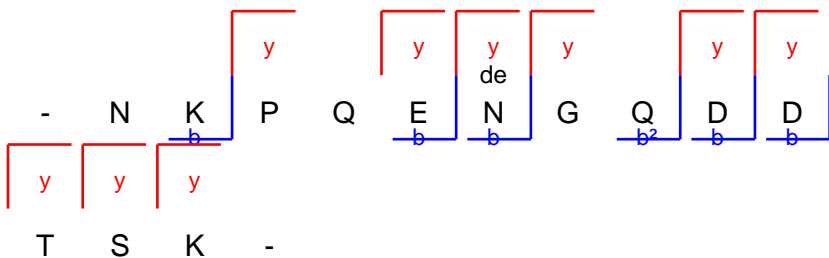

RO-QC-160121\_ZackD\_SS\_Set\_02\_Fraction 7588 FTMS; HCl 45.86 730.41 CDC20

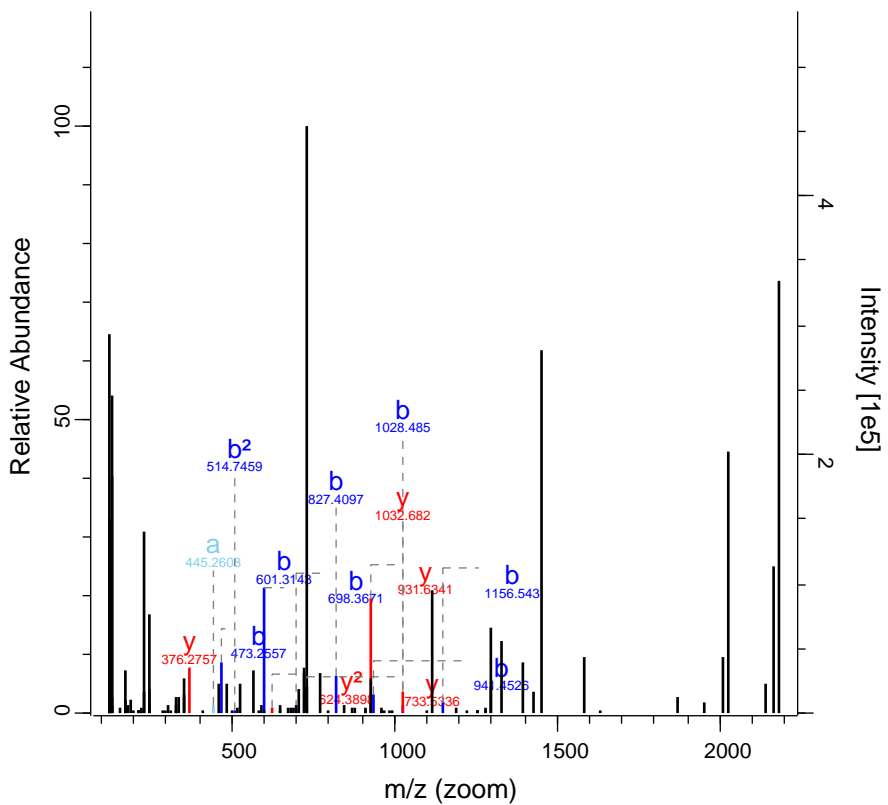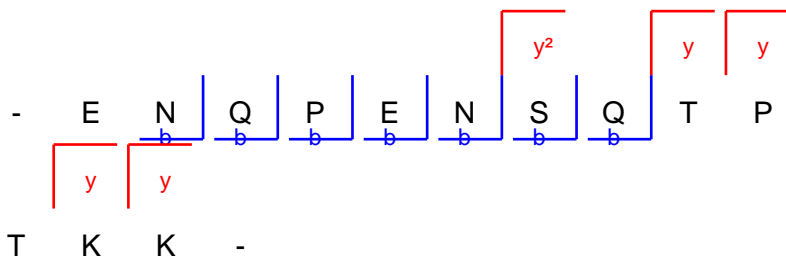



RO-QC-160121\_ZackD\_SS\_Set\_02\_Fraction 7932 FTMS; HCl 142.43 786.9 SLC46A1

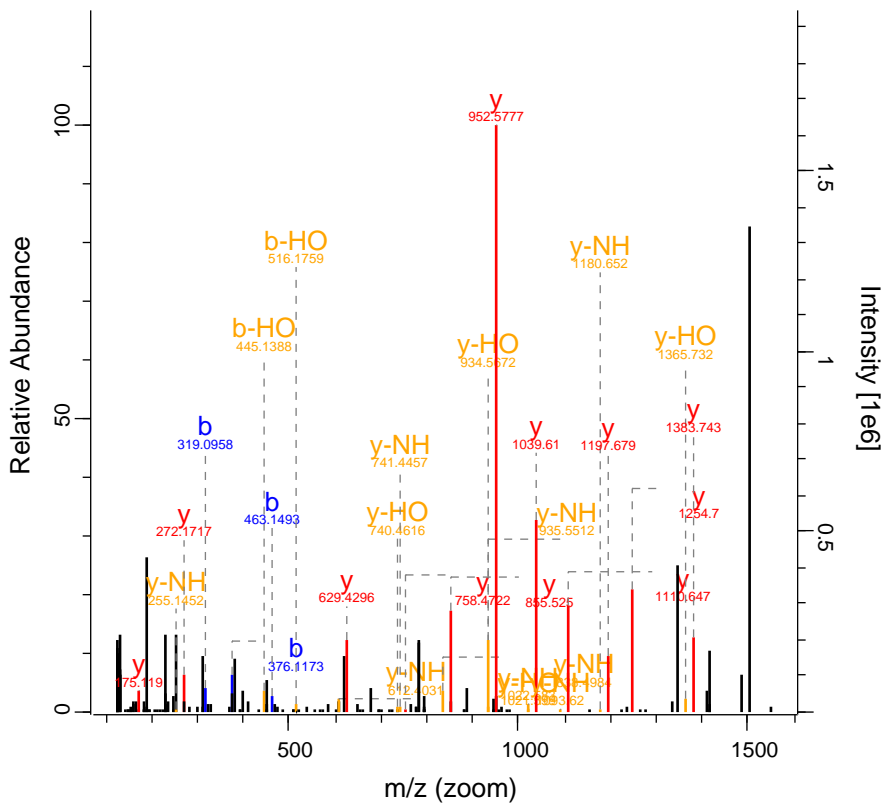

RO-QC-160121\_ZackD\_SS\_Set\_02\_Fraction 7948 FTMS; HC 148.28 866.42 PDGFA

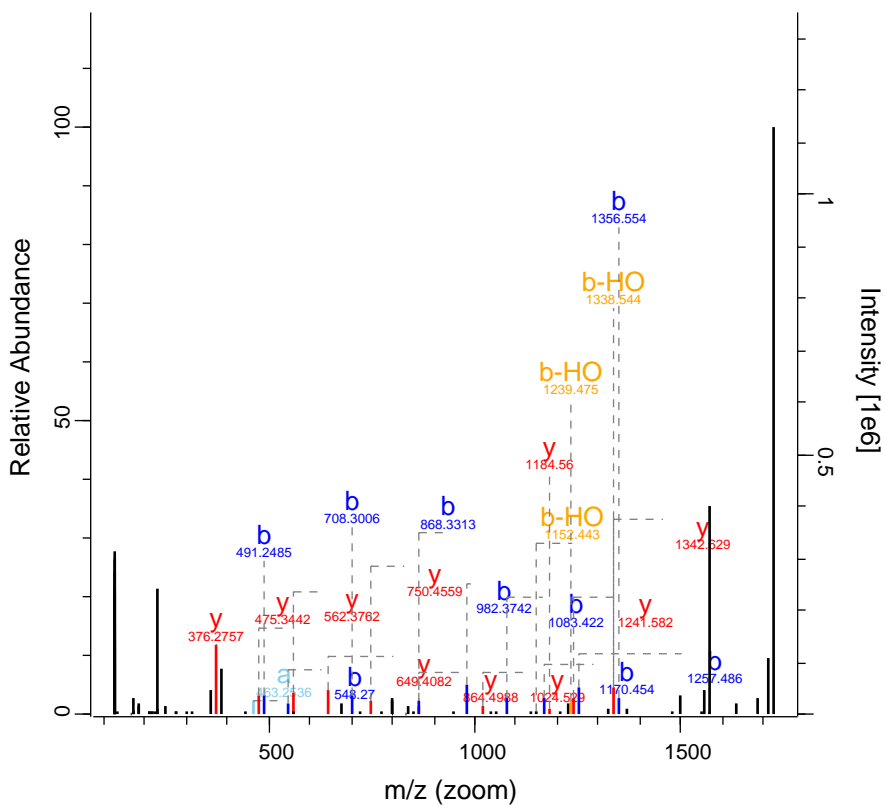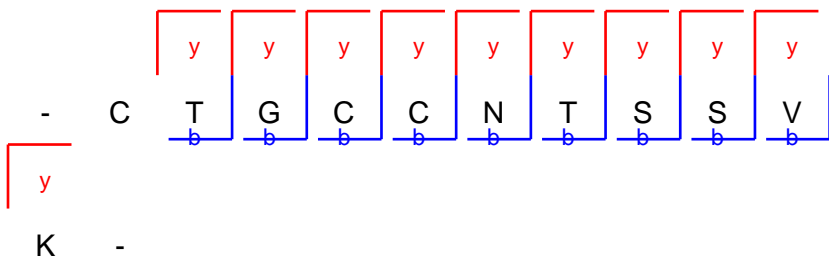

RO-QC-160121\_ZackD\_SS\_Set\_02\_Fraction 8148 FTMS; HCl 117.7 786.9 SLC46A1

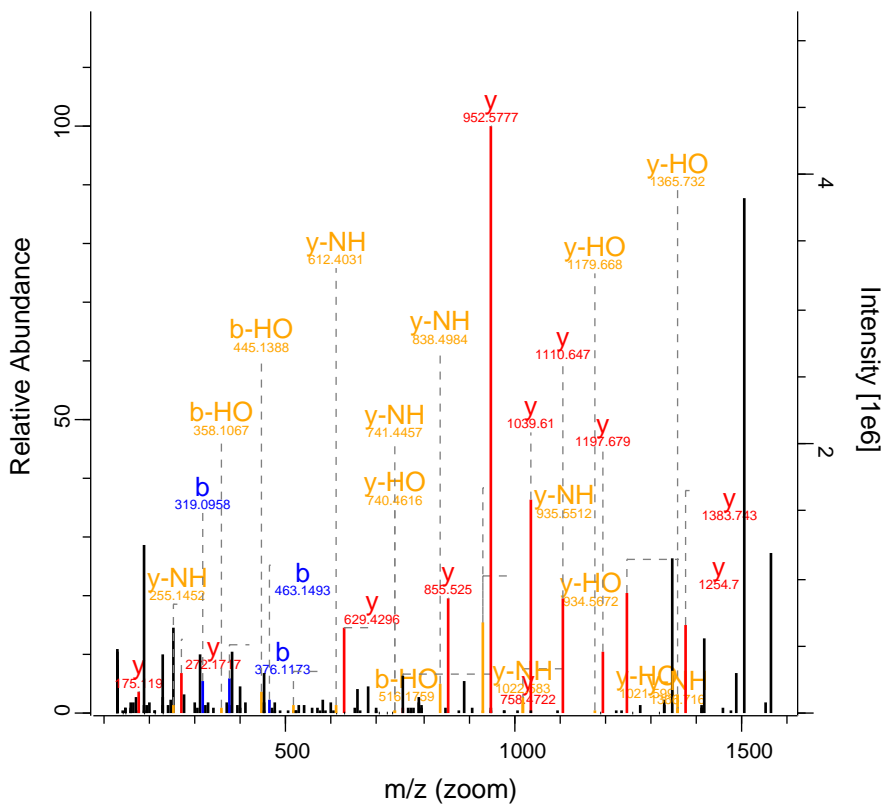



RO-QC-160121\_ZackD\_SS\_Set\_02\_Fraction 9053 FTMS; HCl 88.31 605.95 CHCHD5

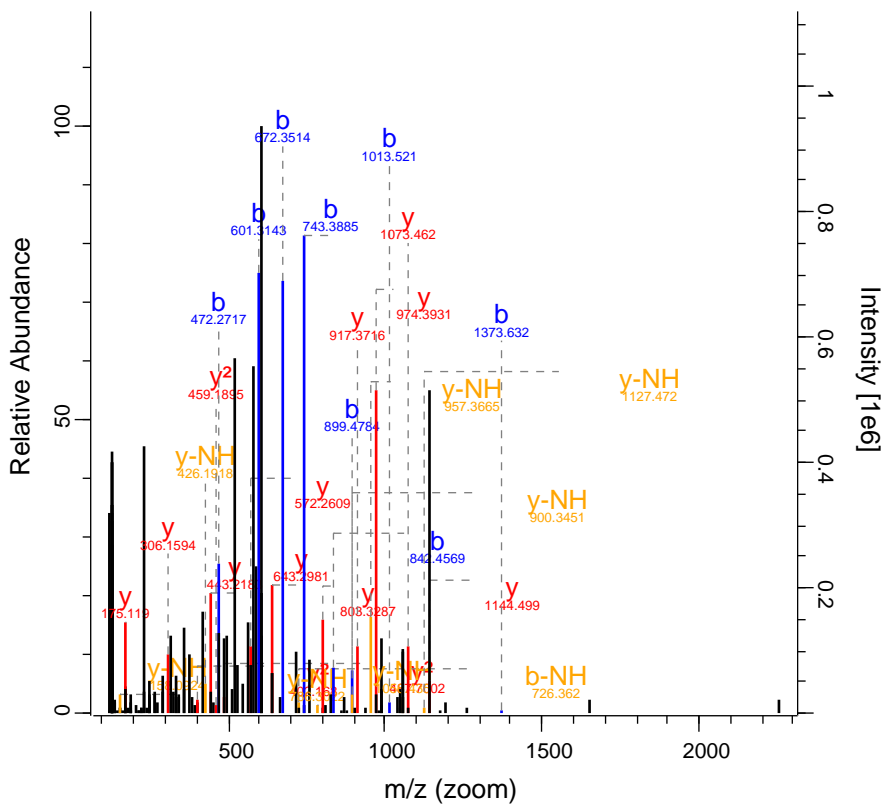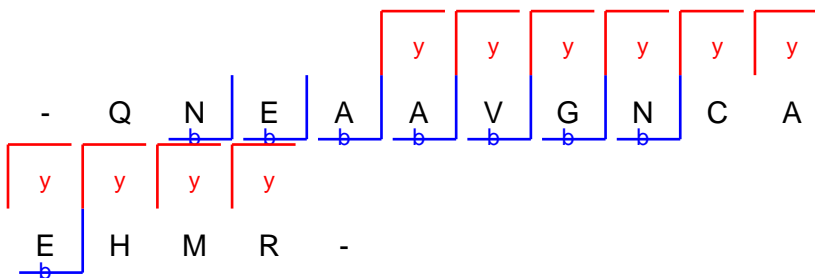

RO-QC-160121\_ZackD\_SS\_Set\_02\_Fraction 9076 FTMS; HC 115.78 378.21 GGT7

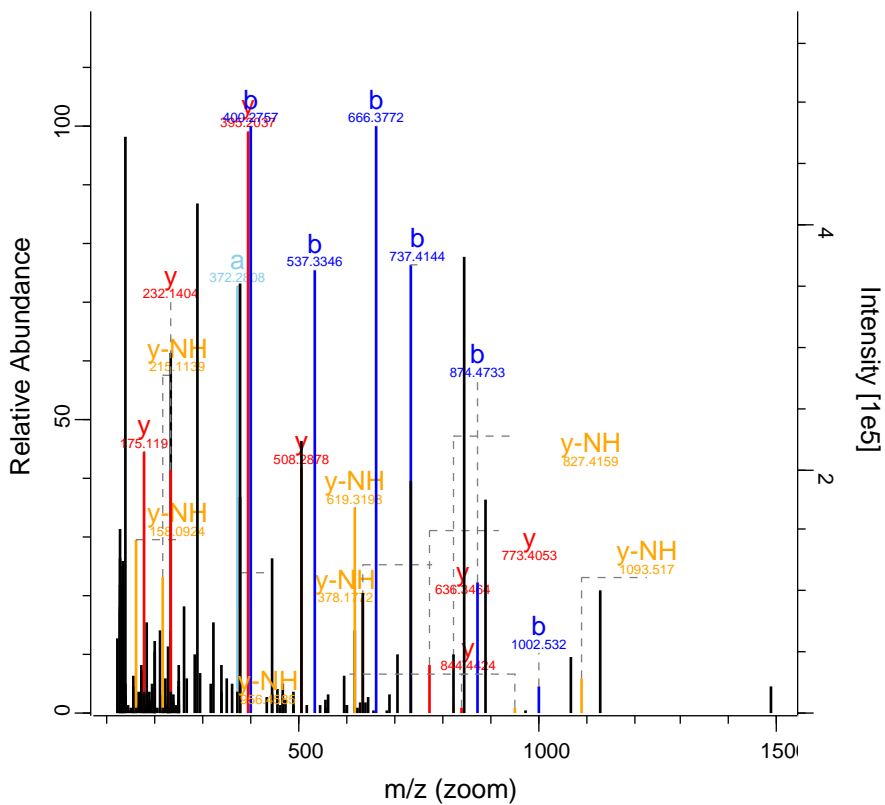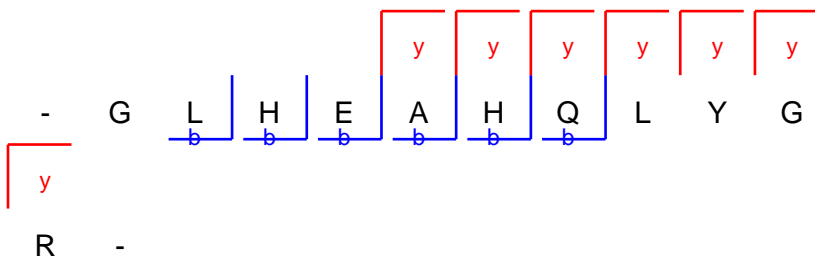

RO-QC-160121\_ZackD\_SS\_Set\_02\_Fraction 9466 FTMS; HC 167.67 828.48 AURKB

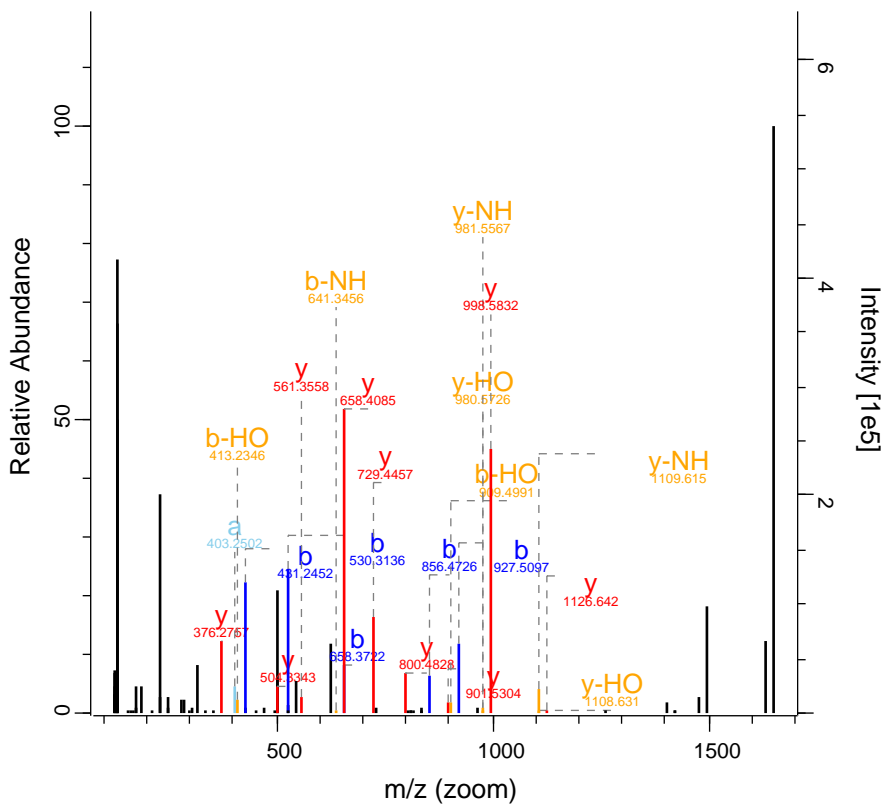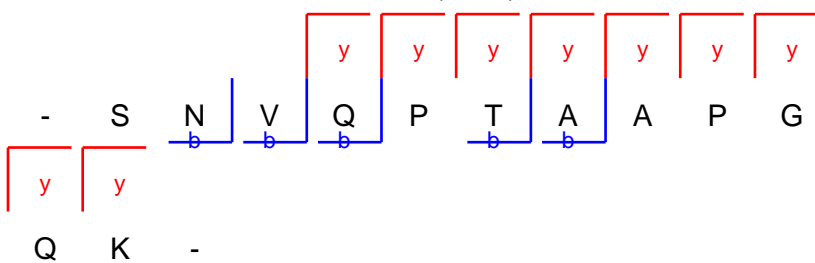

Q K -

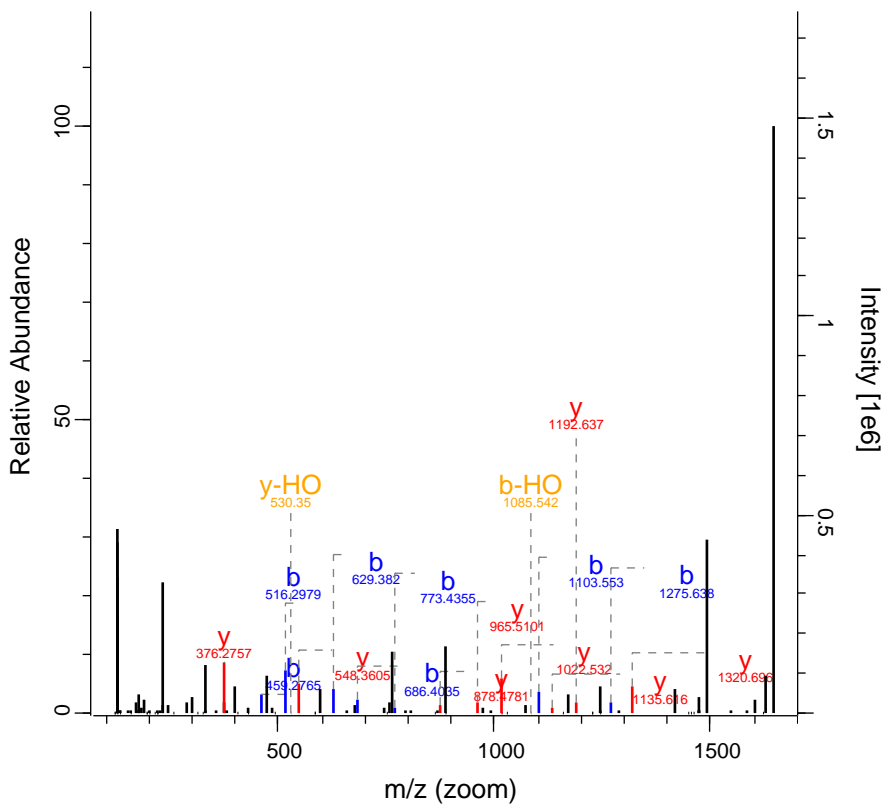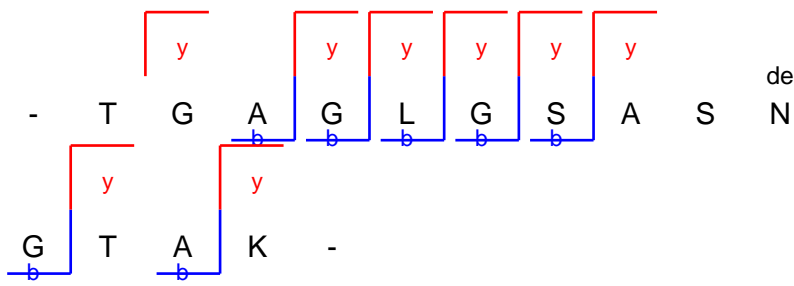

RO-QC-160121\_ZackD\_SS\_Set\_02\_Fractio 10781 FTMS; HC 171.92 813.95 TRMT13

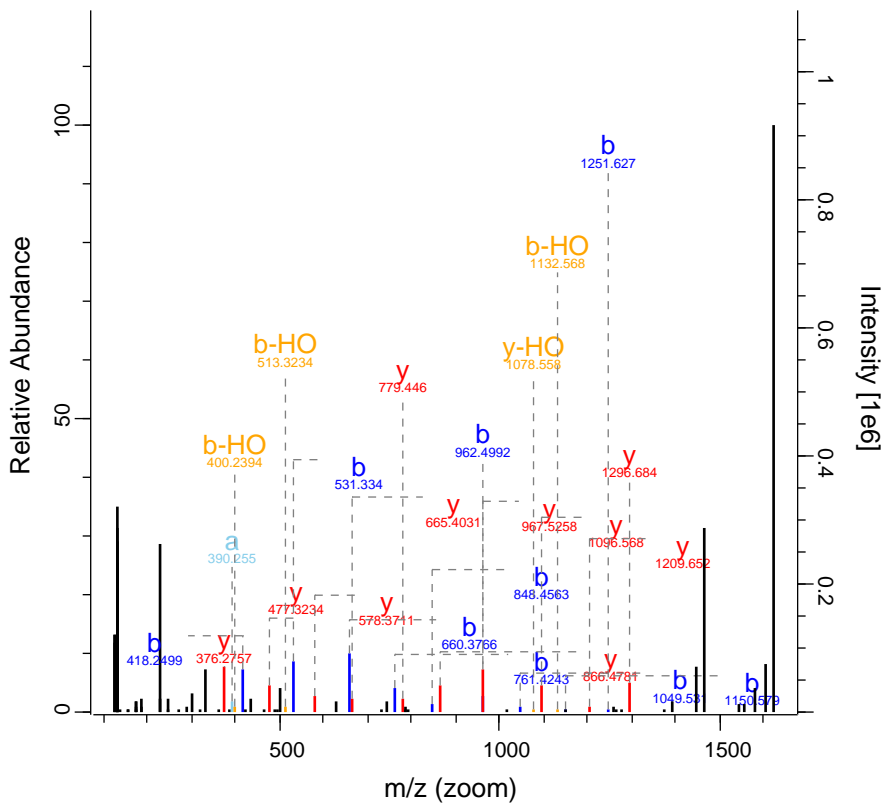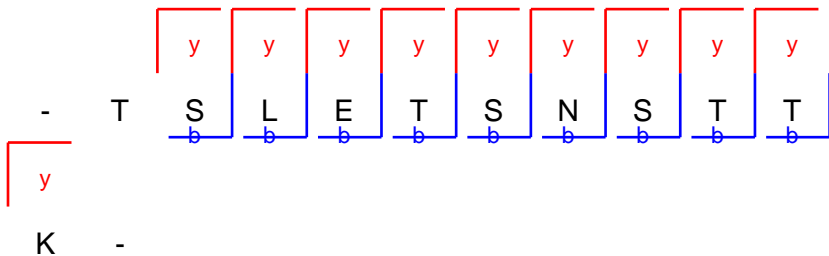

RO-QC-160121\_ZackD\_SS\_Set\_02\_Fraction 10894 FTMS; HC 47.26 996.96 ANO3

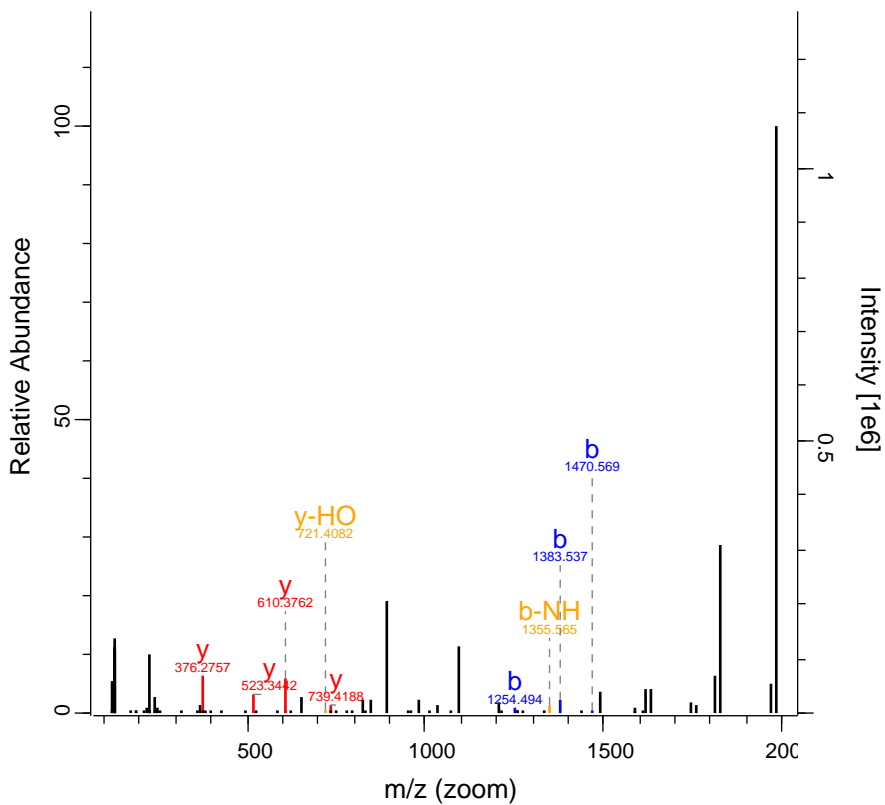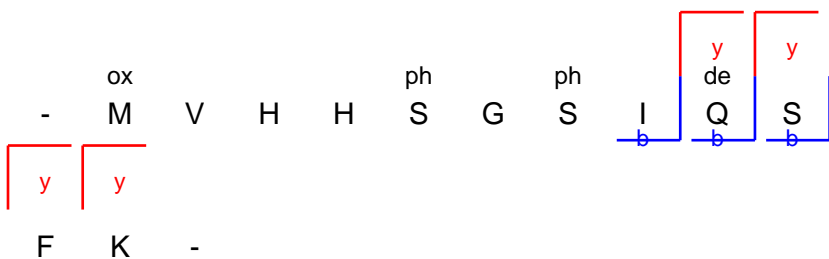

F K -

RO-QC-160121\_ZackD\_SS\_Set\_02\_Fraction 11172 FTMS; HC 89.14 464.61 KCNV2

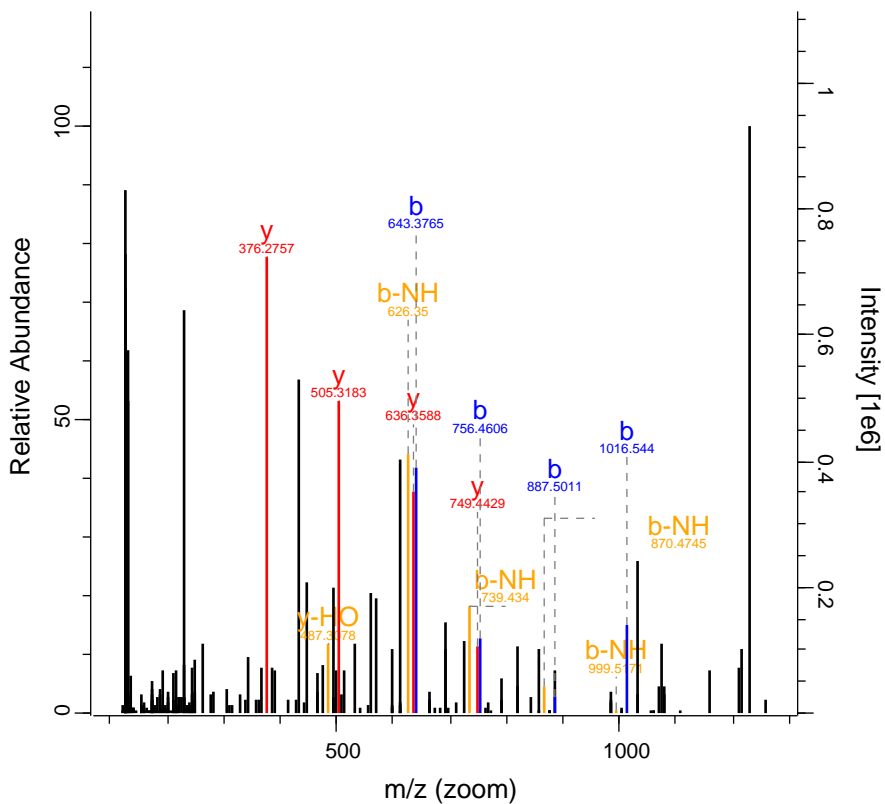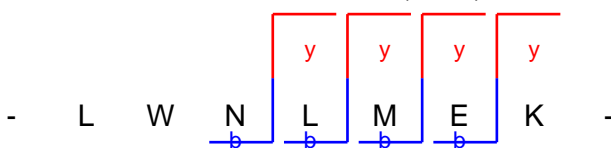

RO-QC-160121\_ZackD\_SS\_Set\_02\_112011 FTMS; H 88.18 378.7: GOLGA6L1; GOLGA6L6; GOL

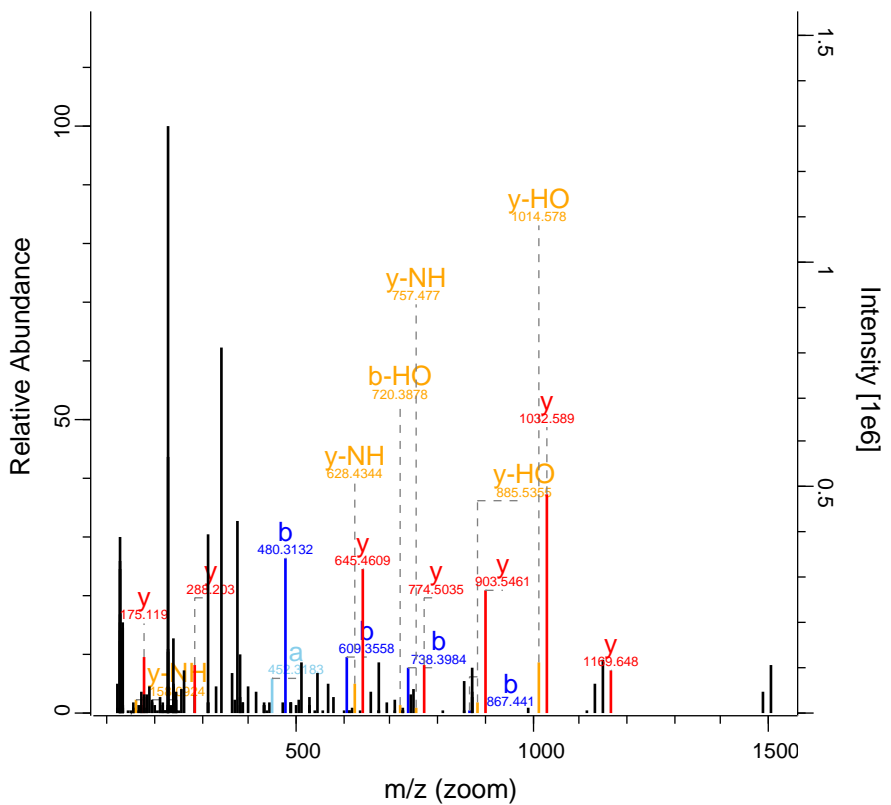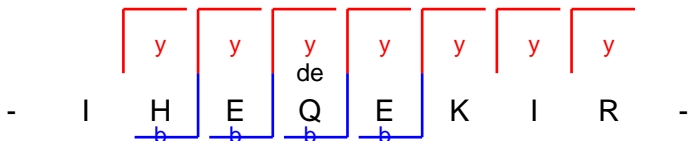



RO-QC-160121\_ZackD\_SS\_Set\_02\_Fraction 11652 FTMS; HC 65.31 391.71 CCDC82

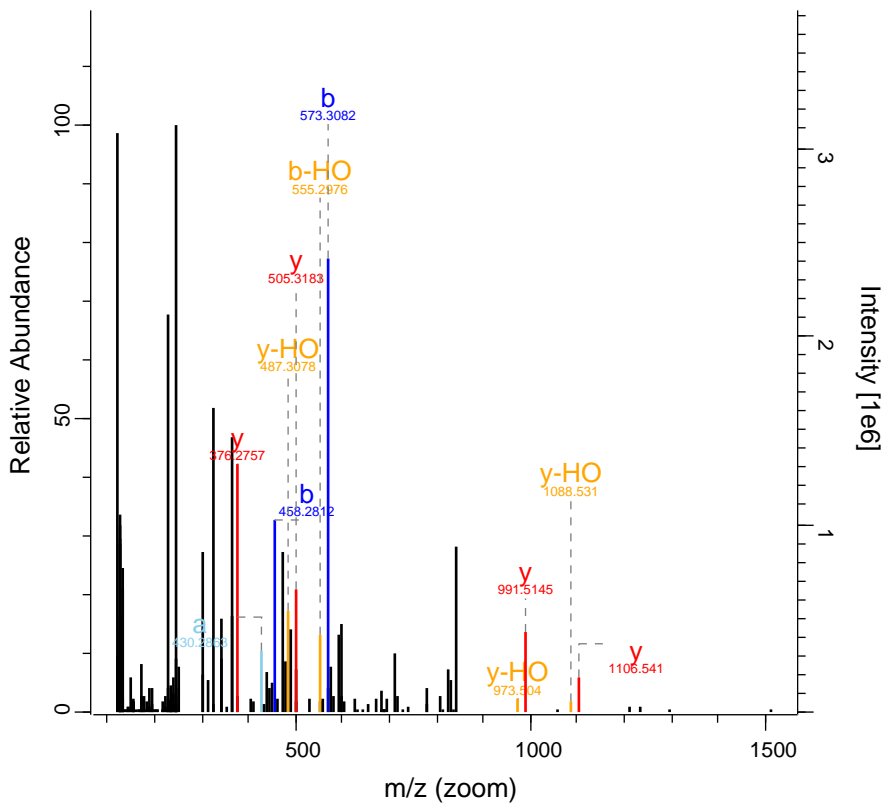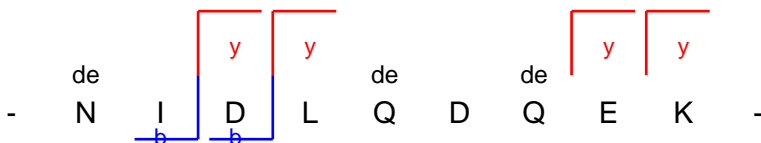

RO-QC-160121\_ZackD\_SS\_Set\_02\_Fraction11660 FTMS; HC 33.89 400.49 USH1C

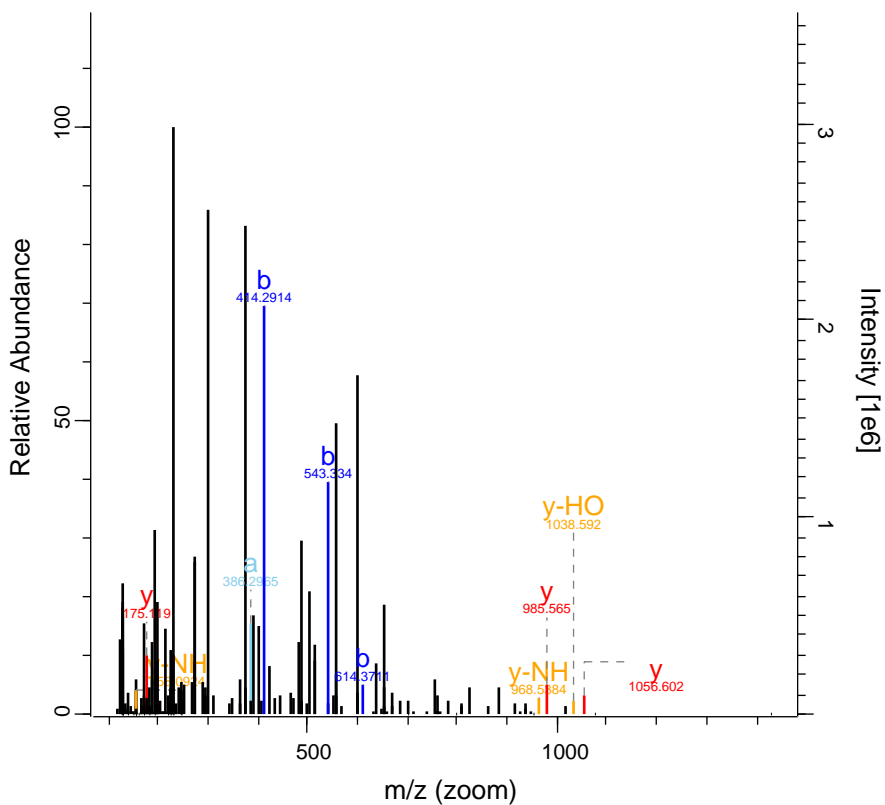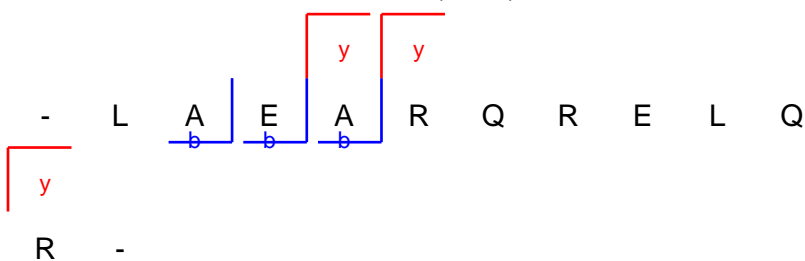

RO-QC-160121\_ZackD\_SS\_Set\_02\_Fractio 11697 FTMS; HC 211.27 734.92 AHR

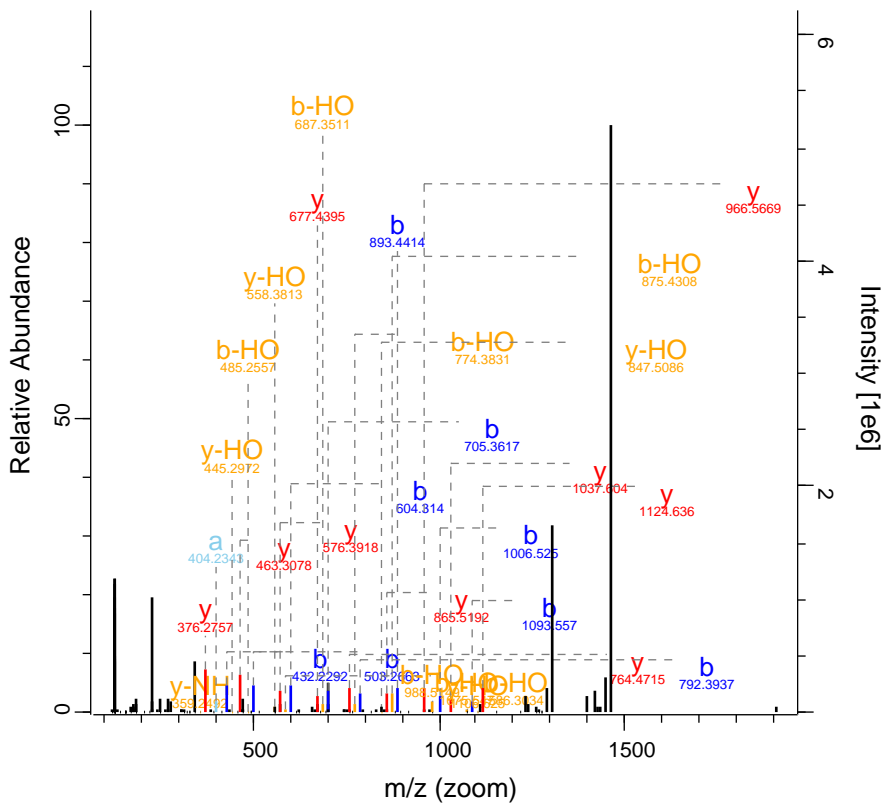

RO-QC-160121\_ZackD\_SS\_Set\_02\_Fractio 12237 FTMS; HC 151.15 786.44 DGKZ

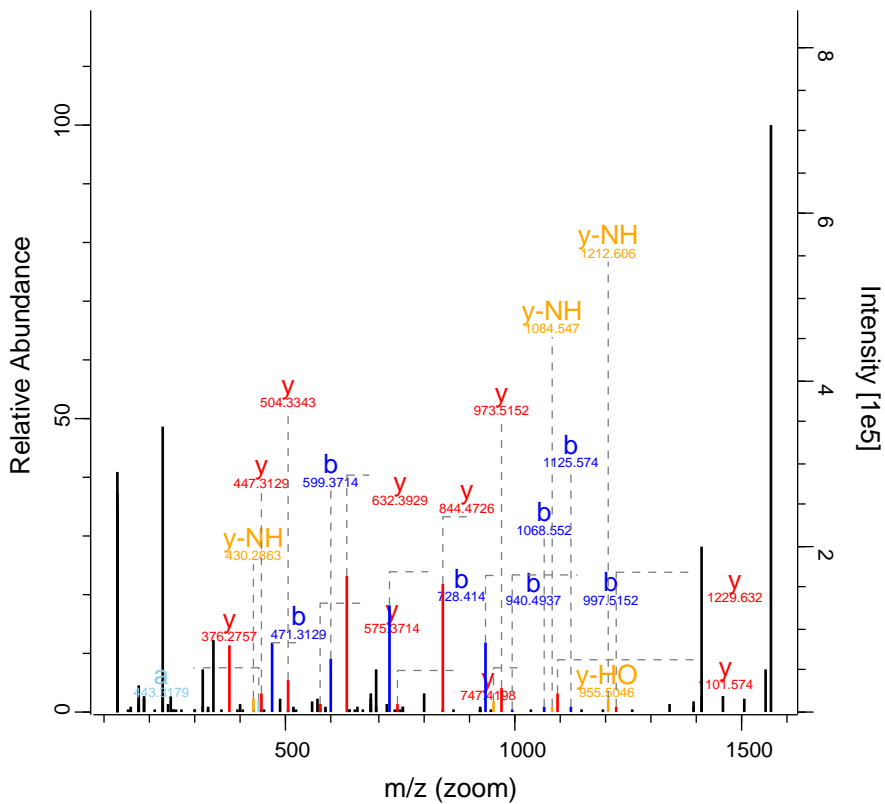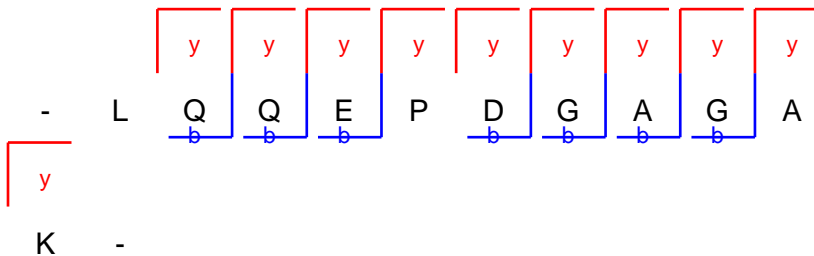

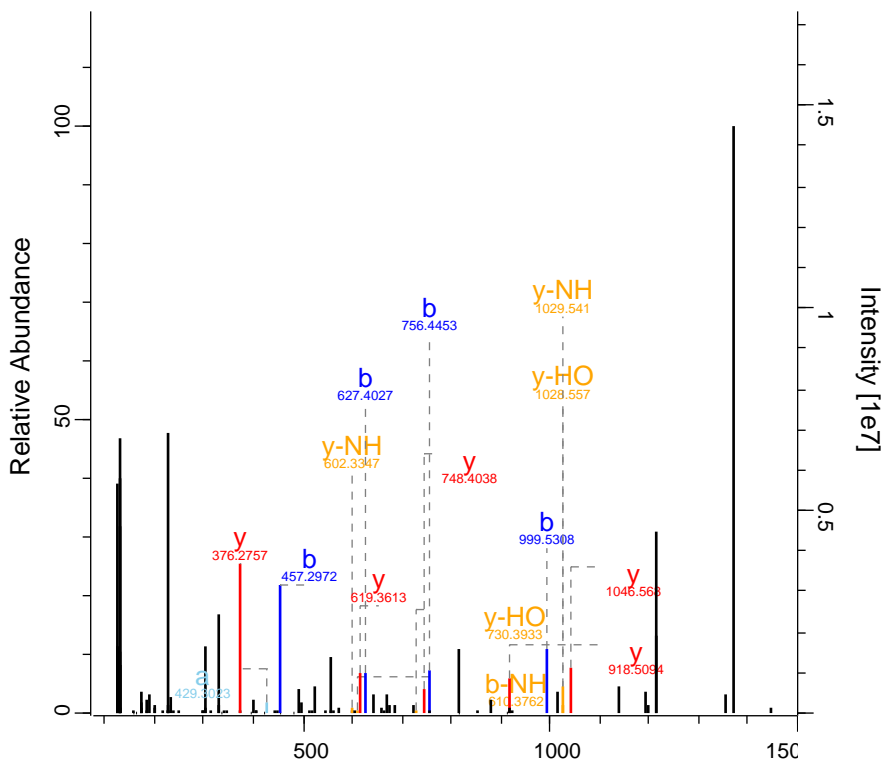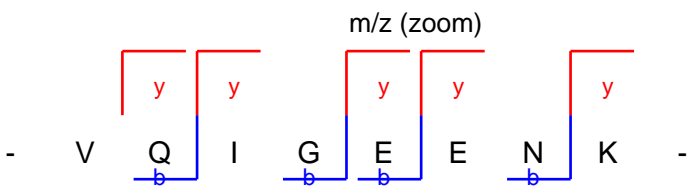

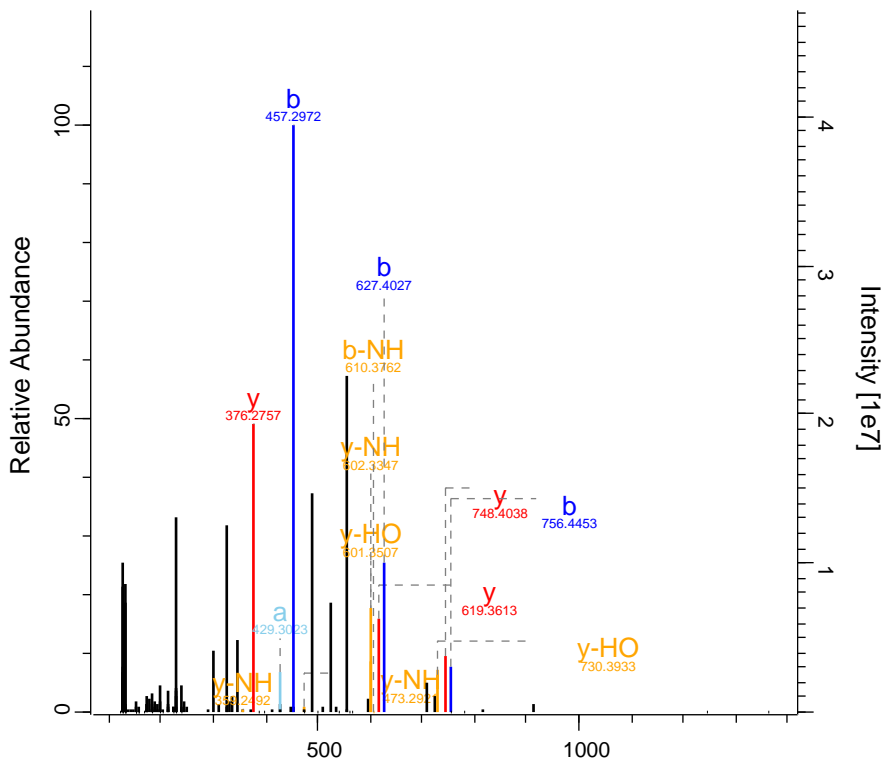

m/z (zoom)

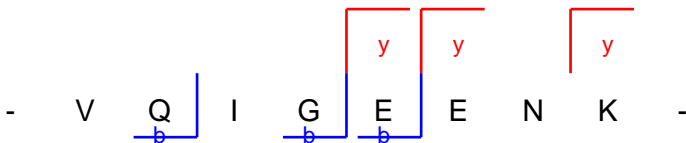

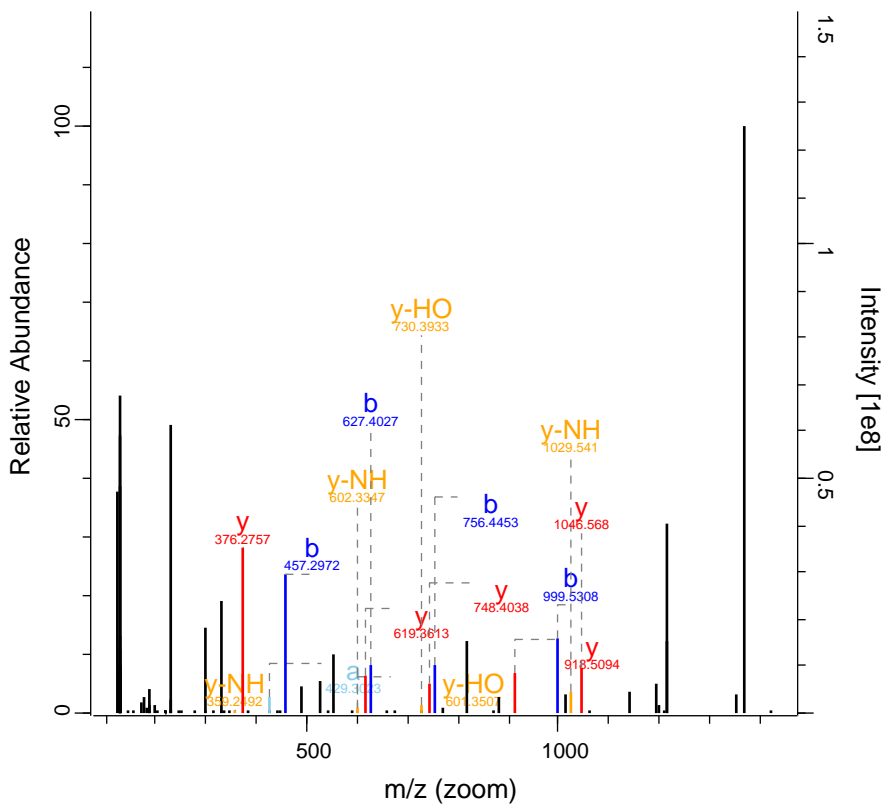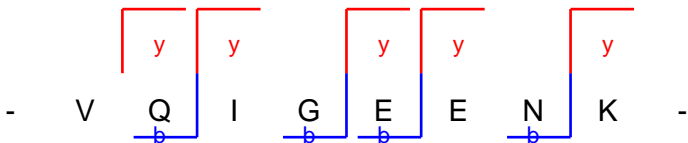

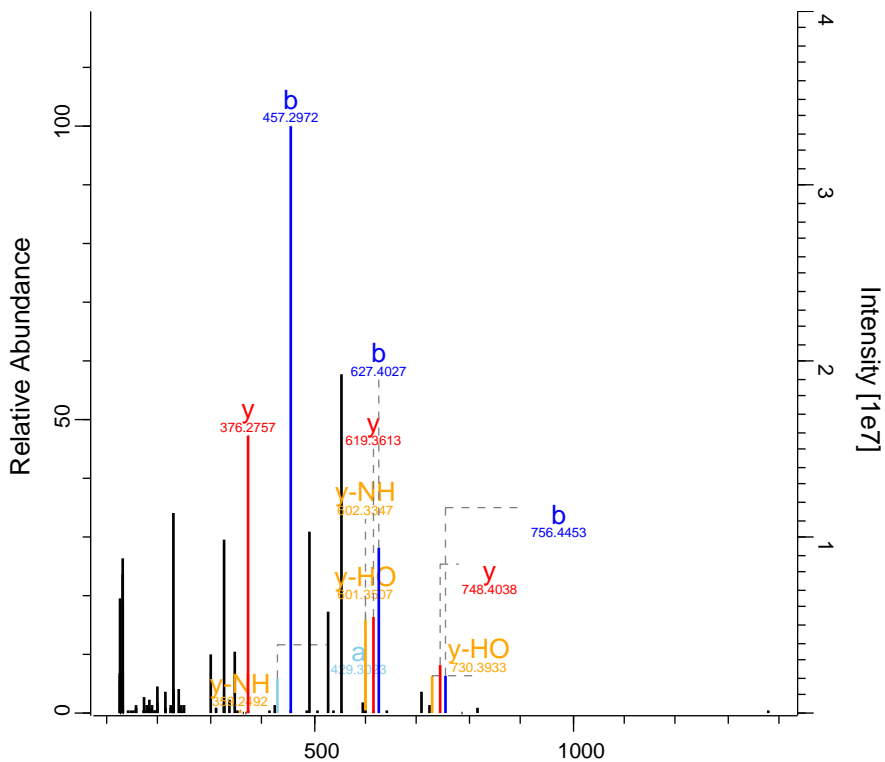

m/z (zoom)

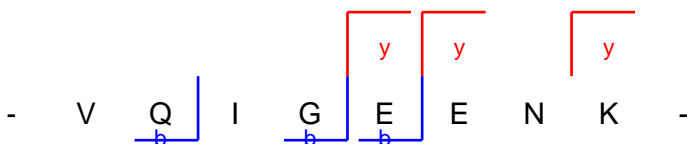



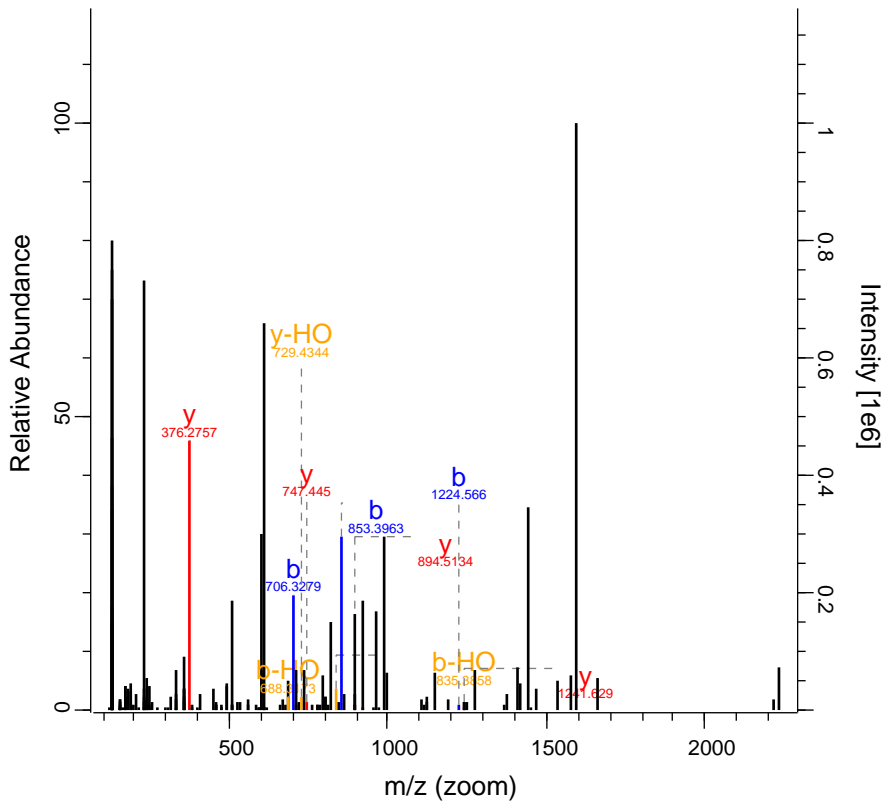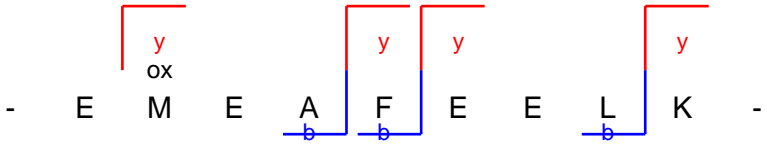

RO-QC-160121\_ZackD\_SS\_Set\_02\_Fraction\_1

12728 FTMS; HCD 41.45 400.71

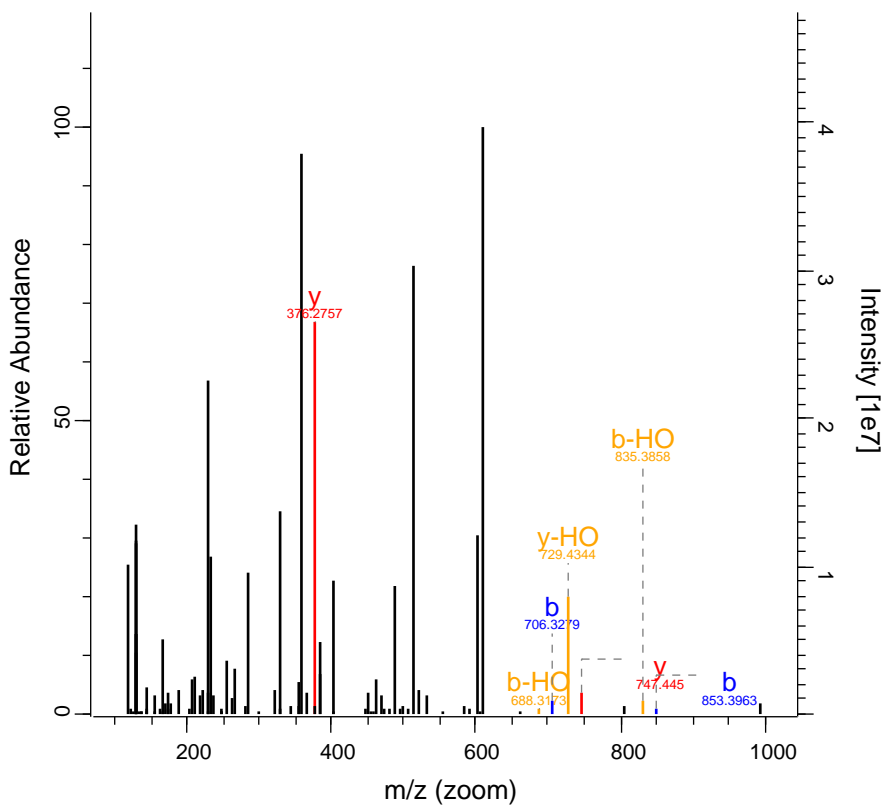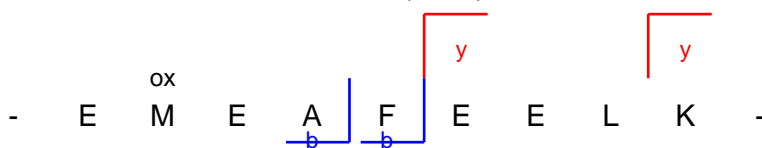

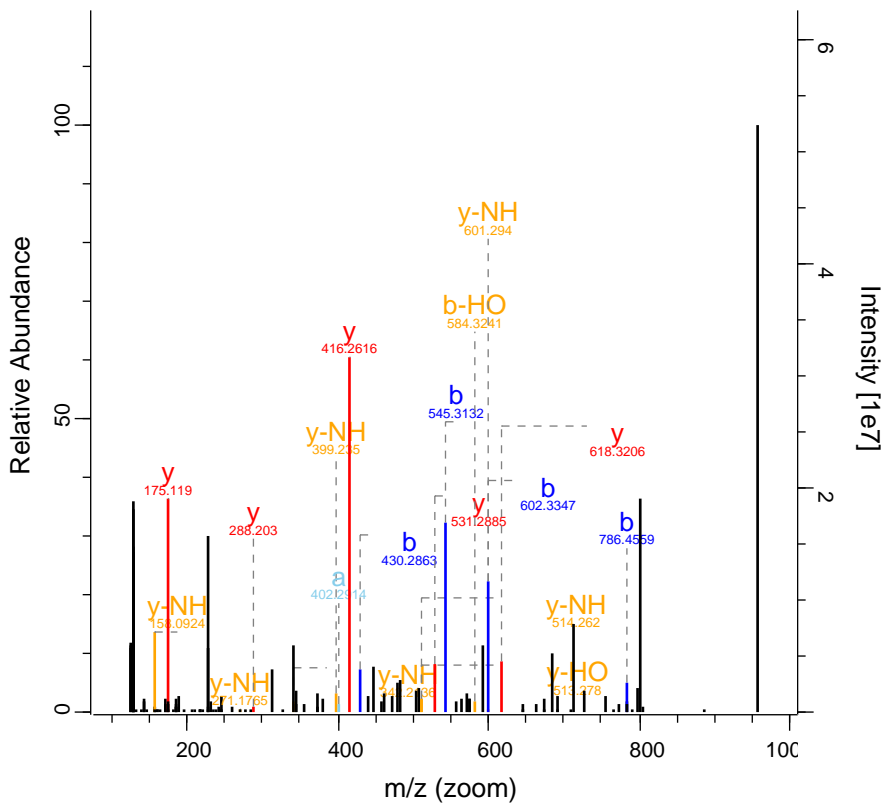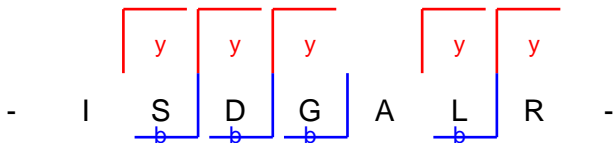

RO-QC-160121\_ZackD\_SS\_Set\_02\_Fraction 13932 FTMS; HCl 116.3 704.9 DGCR2

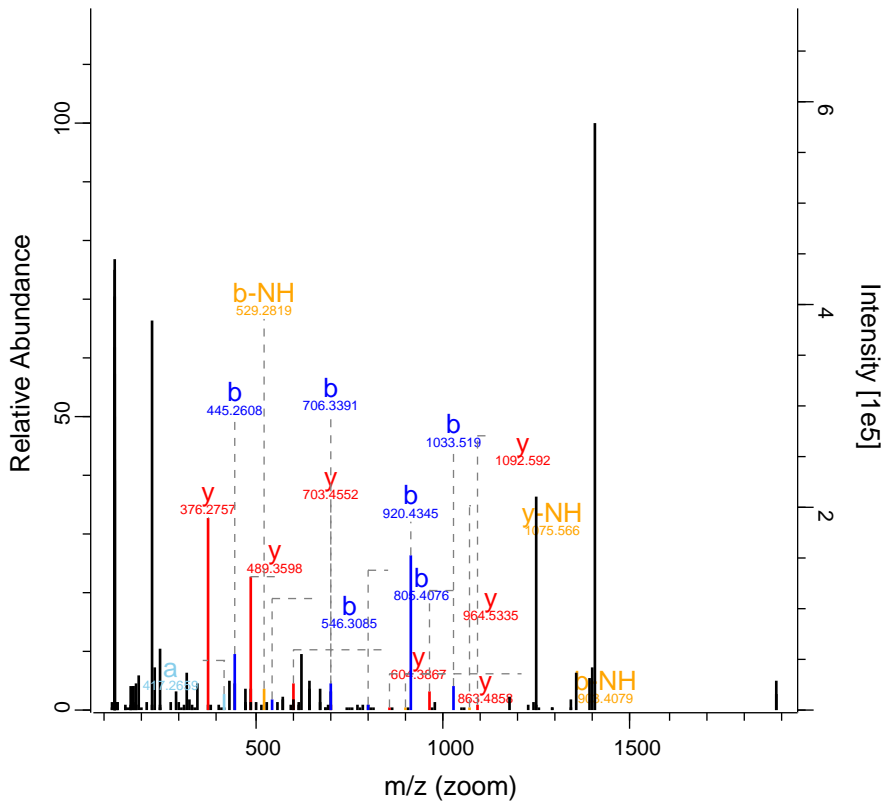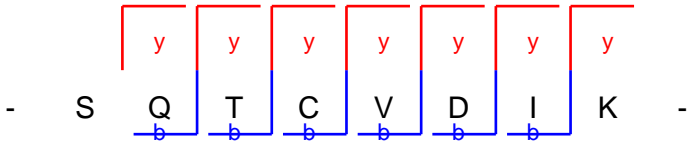

RO-QC-160121\_ZackD\_SS\_Set\_02\_Fractio 14100 FTMS; HC 184.02 838.68 SLC43A2

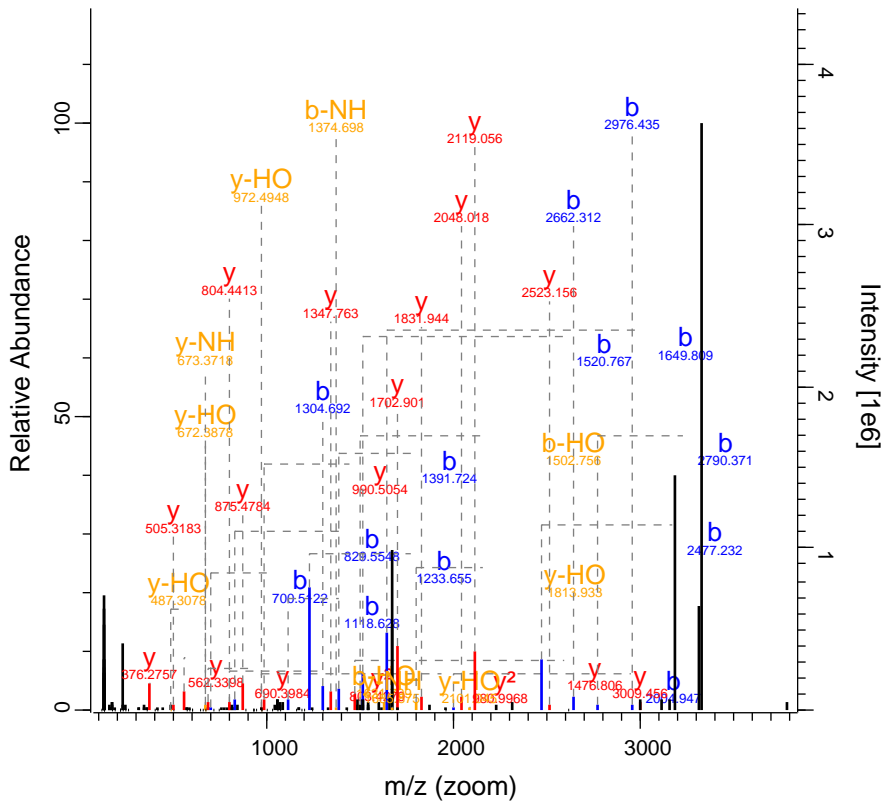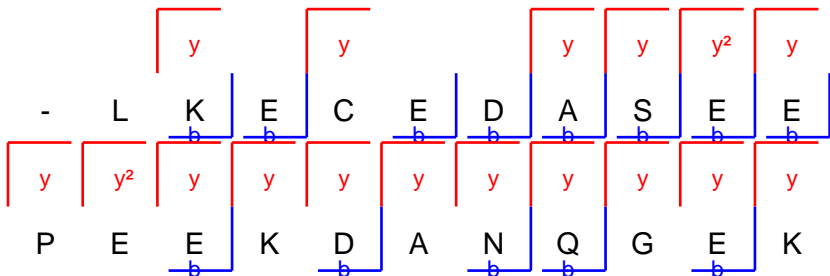

RO-QC-160121\_ZackD\_SS\_Set\_02\_Fractic 14481 FTMS; HC 140.14 1018.58 SP2

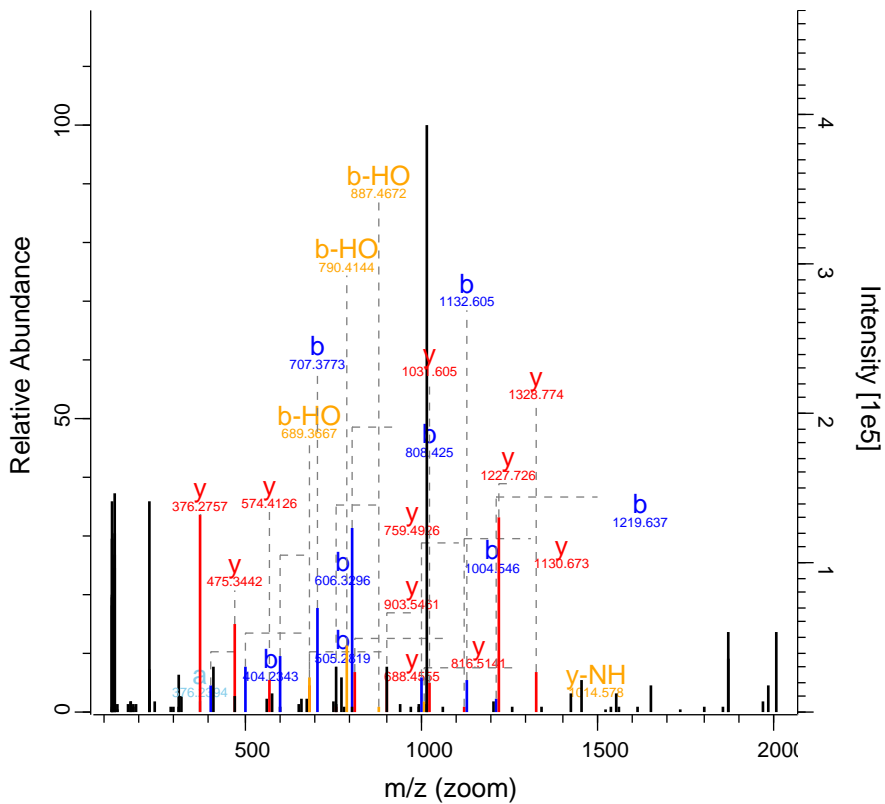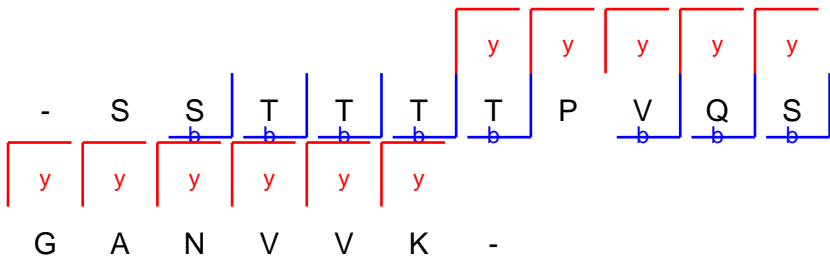

RO-QC-160121\_ZackD\_SS\_Set\_02\_Fraction 16778 FTMS; HC 63.73 715.41 FANCB

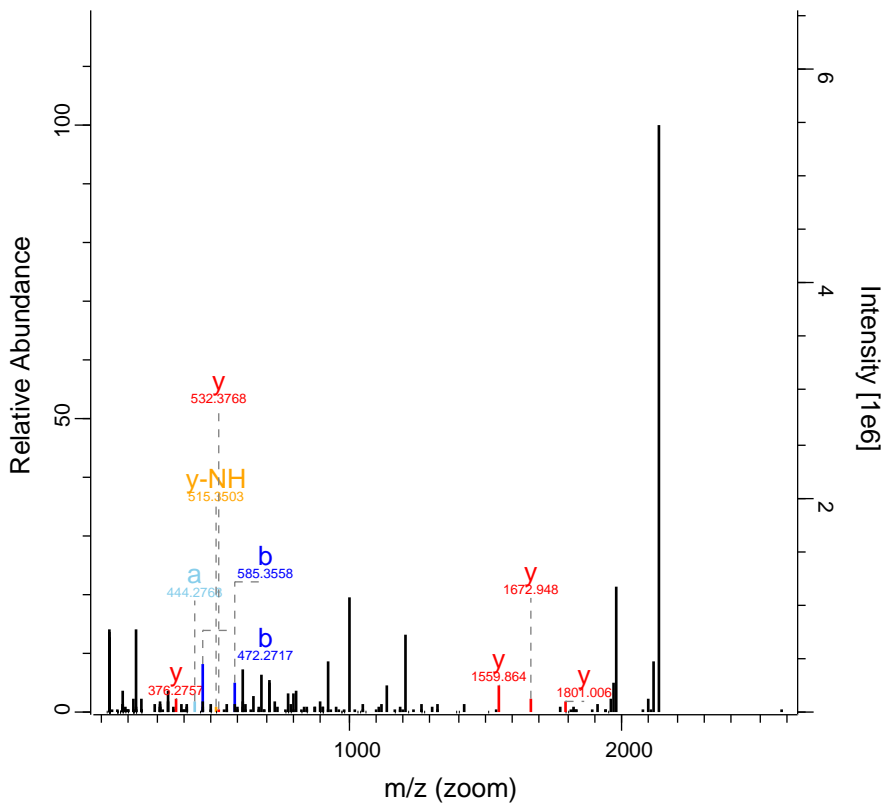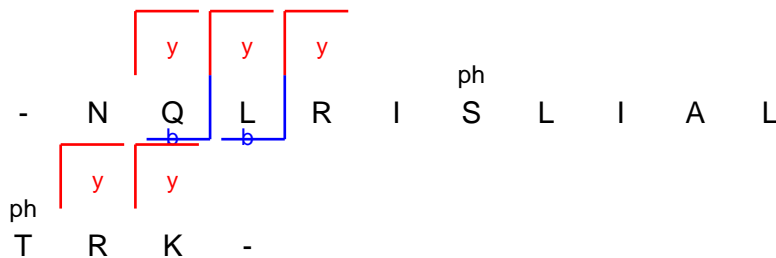





RO-QC-160121\_ZackD\_SS\_Set\_02\_Fraction 16954 FTMS; HC 97.45 745.71 RGS10

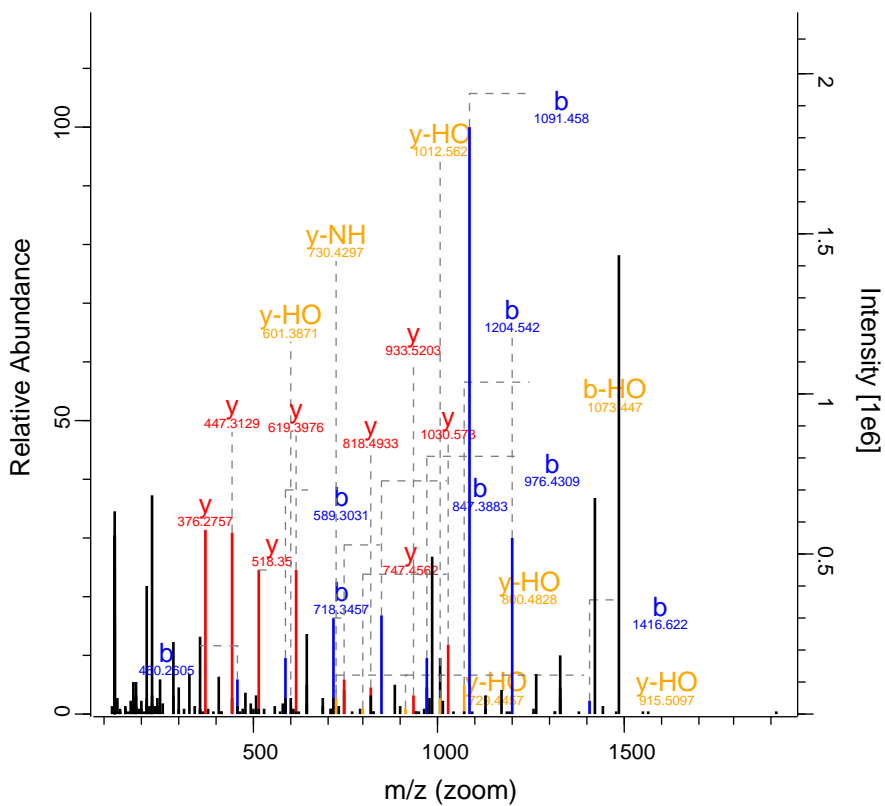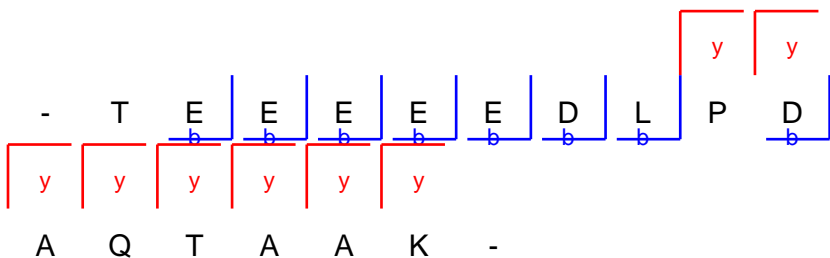

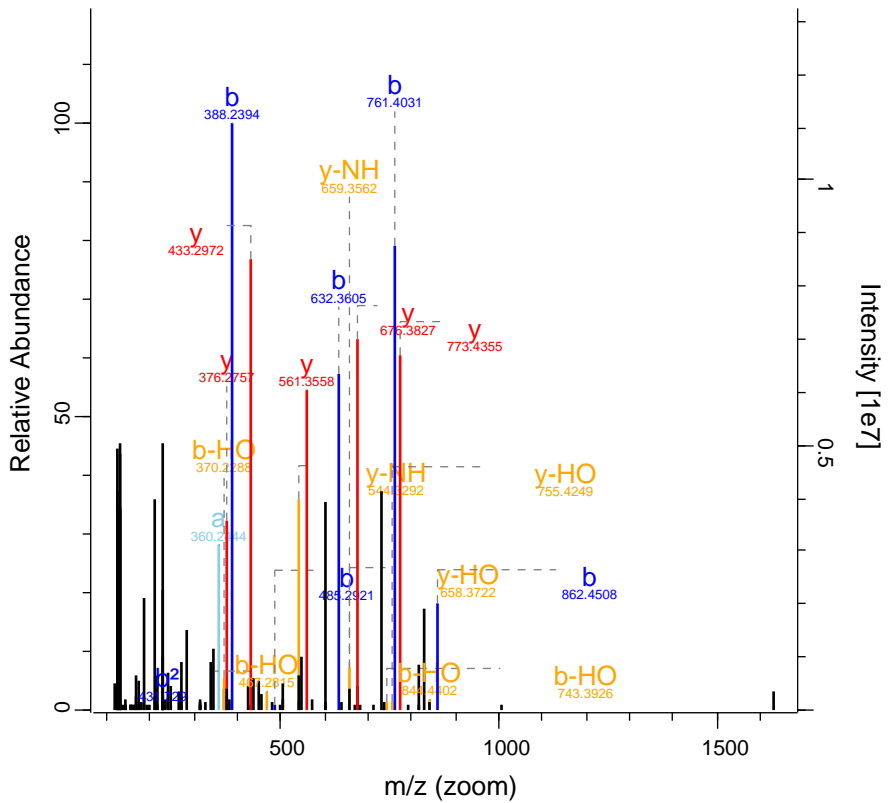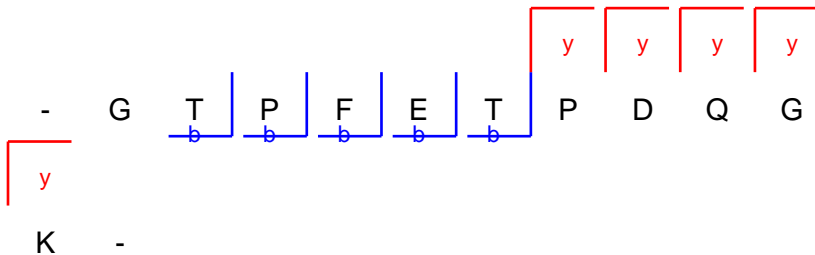



RO-QC-160121\_ZackD\_SS\_Set\_02\_Fractio 17565 FTMS; HC 179.81 806.92 TRAM2

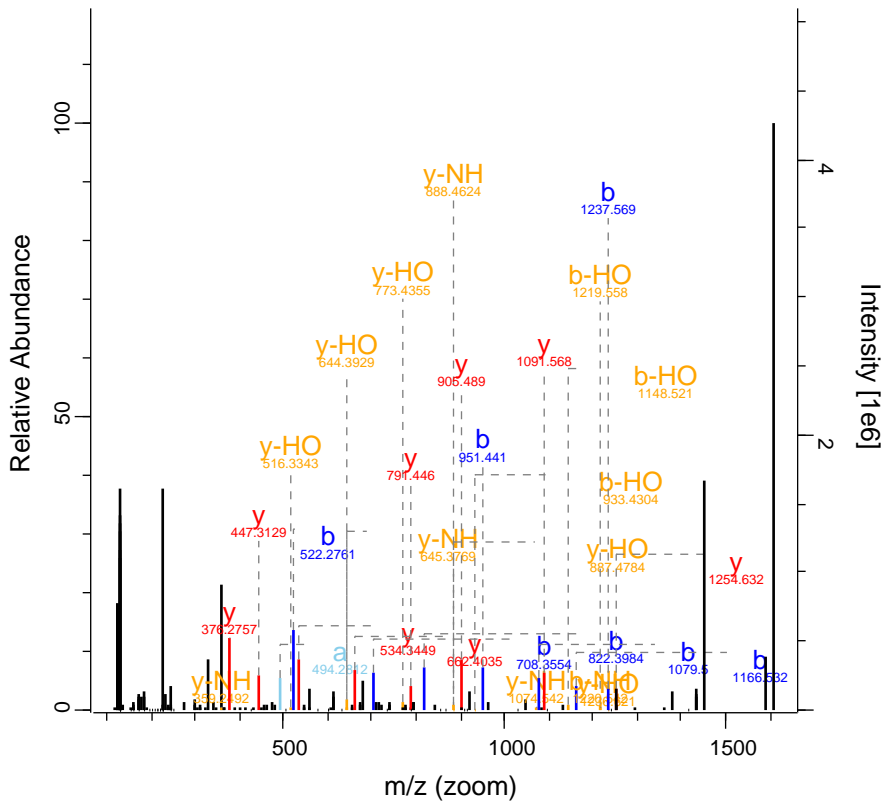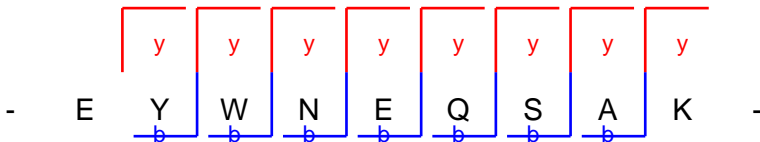

RO-QC-160121\_ZackD\_SS\_Set\_02\_Fraction 17738 FTMS; HC 60.4 525.64 SESTD1

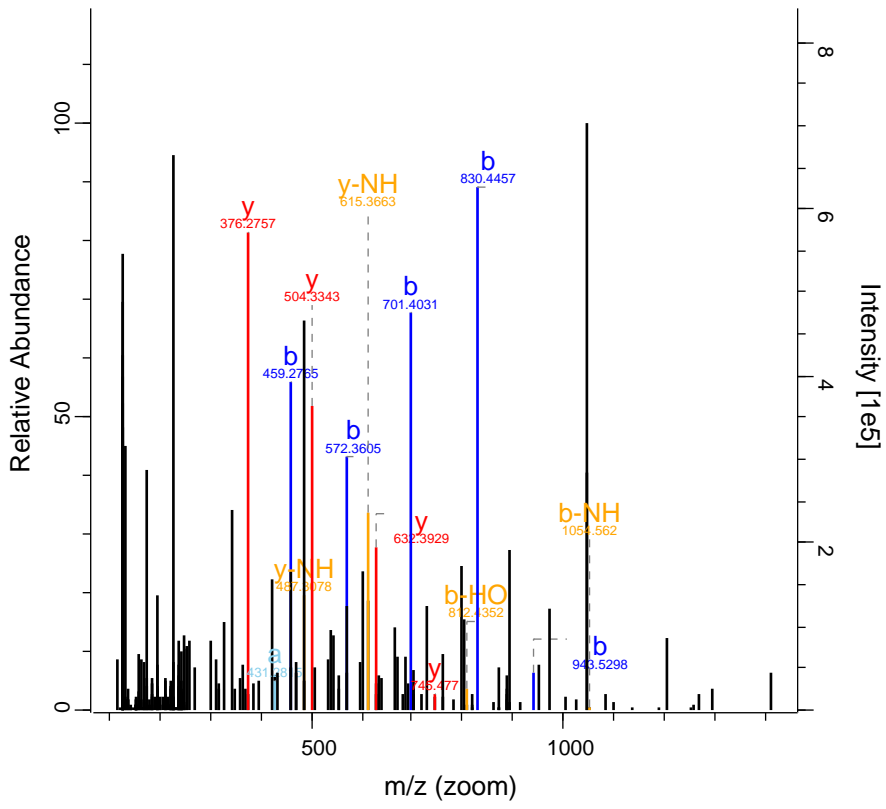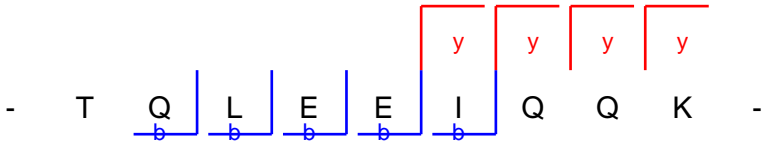

RO-QC-160121\_ZackD\_SS\_Set\_02\_Fractio 17952 FTMS; HC 106.88 682.36 FBXO30

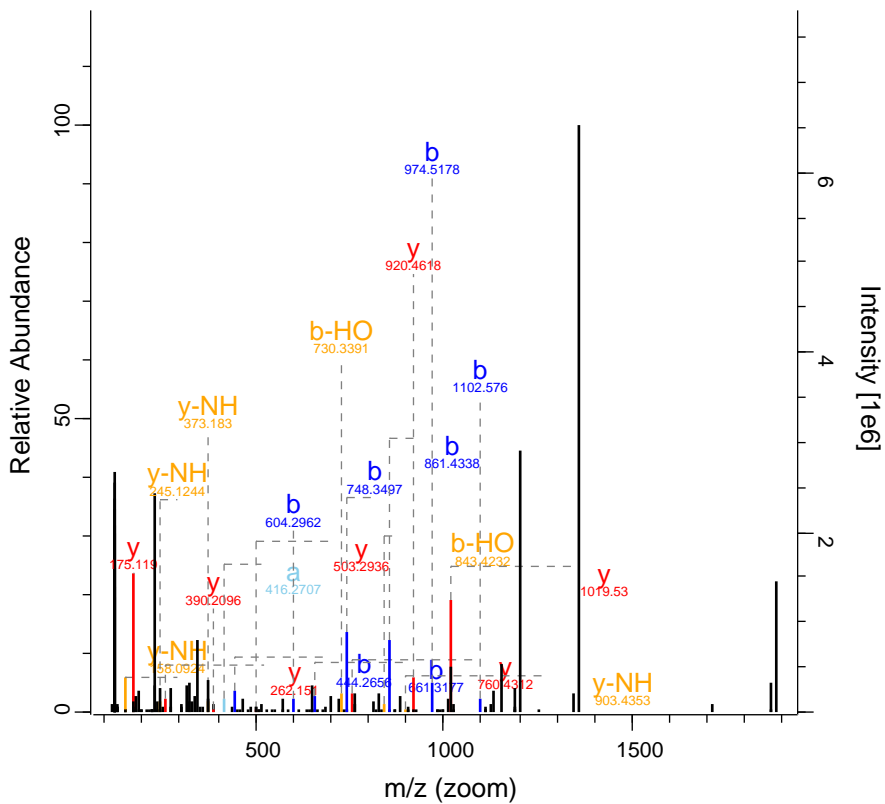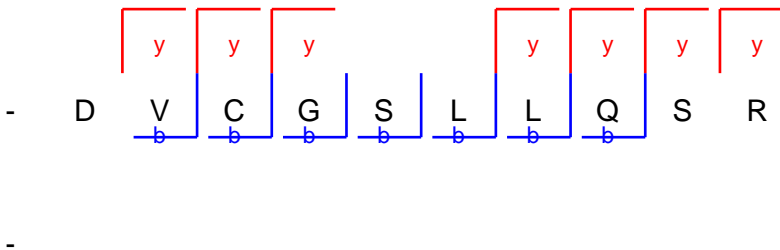

RO-QC-160121\_ZackD\_SS\_Set\_02\_Fractic 18586 FTMS; HC 46.35 1164.61 PATL2

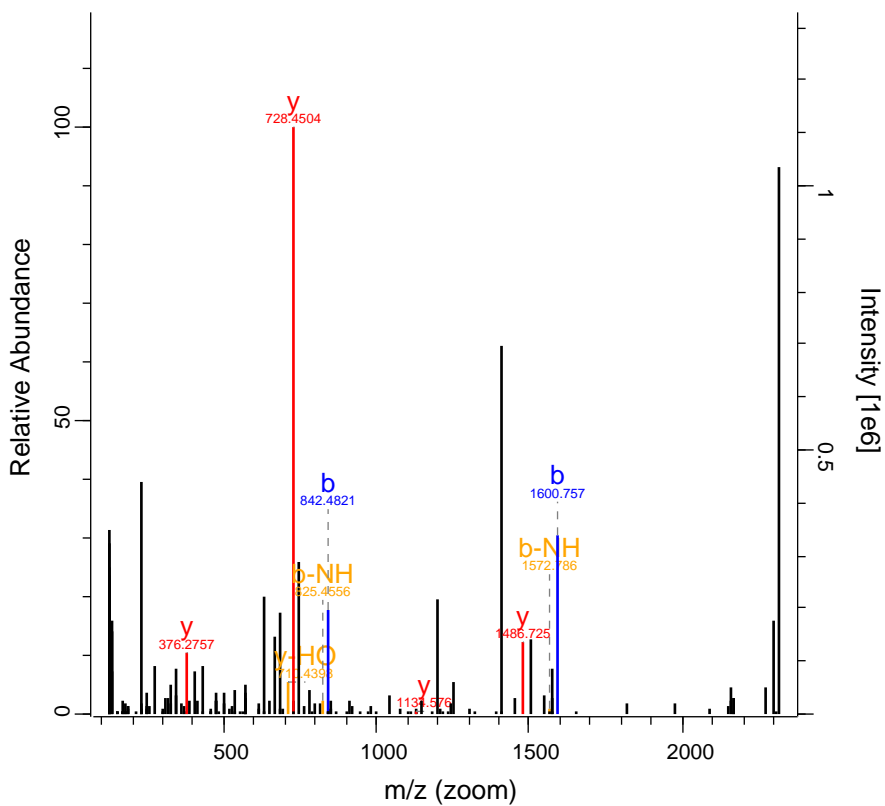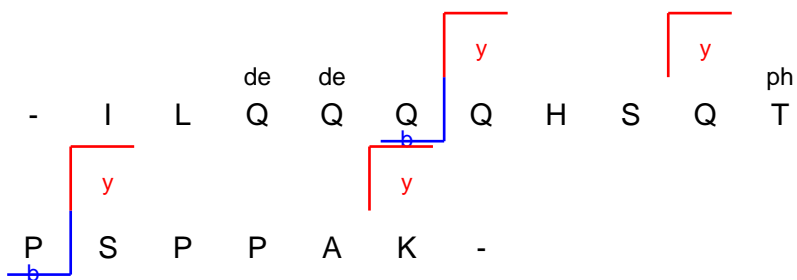

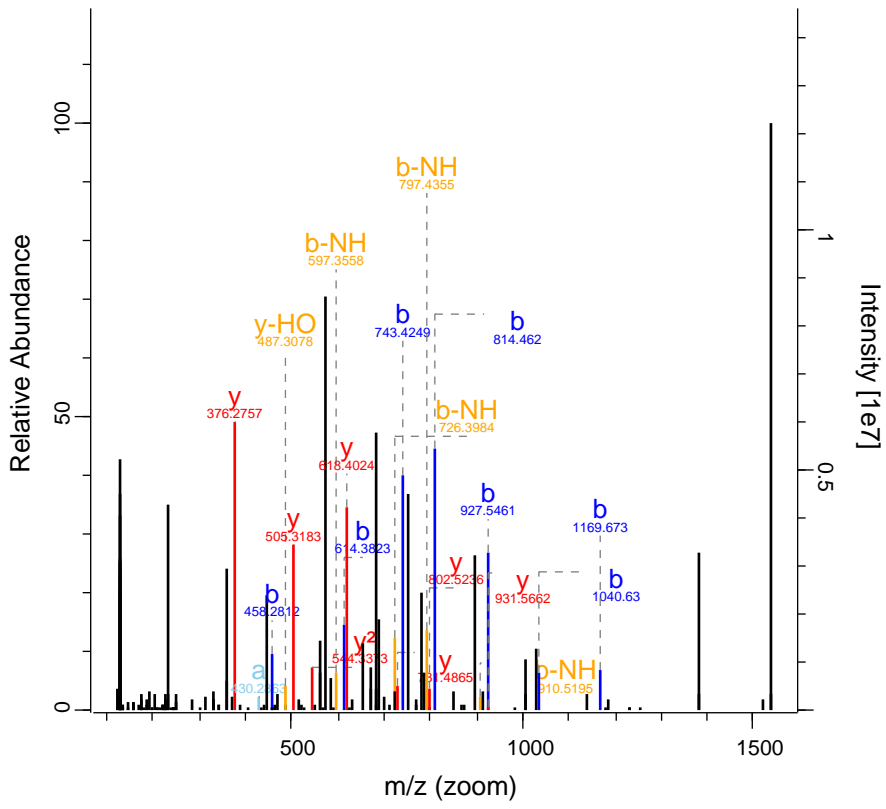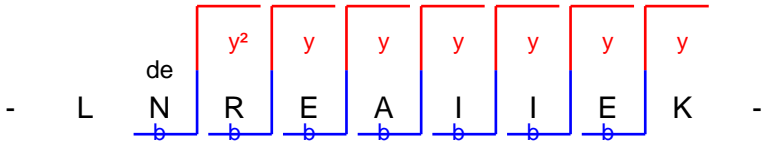



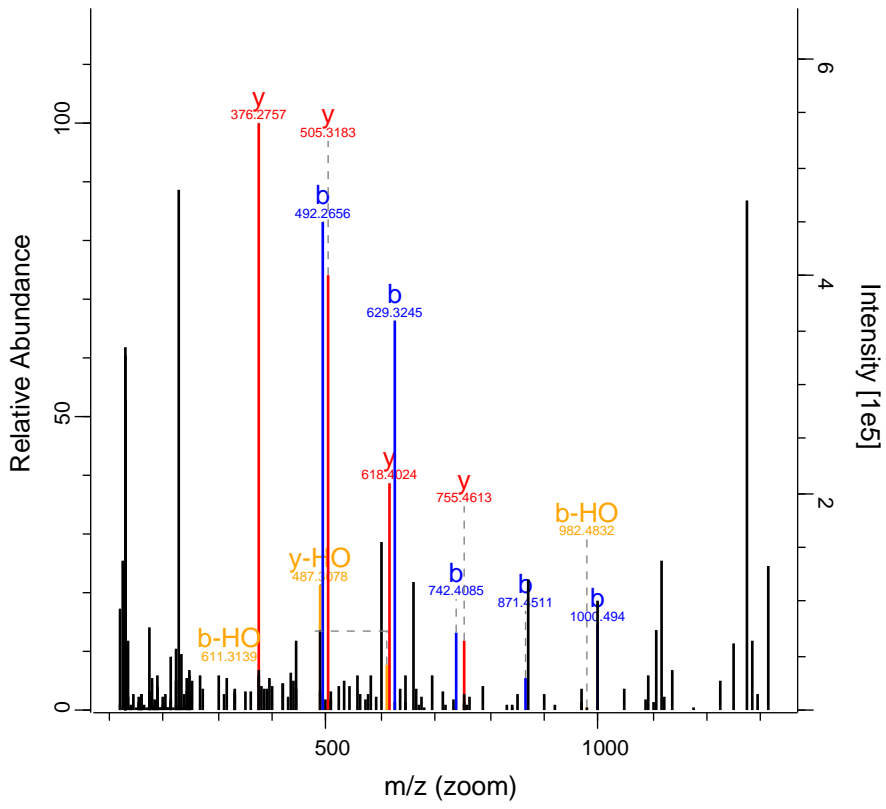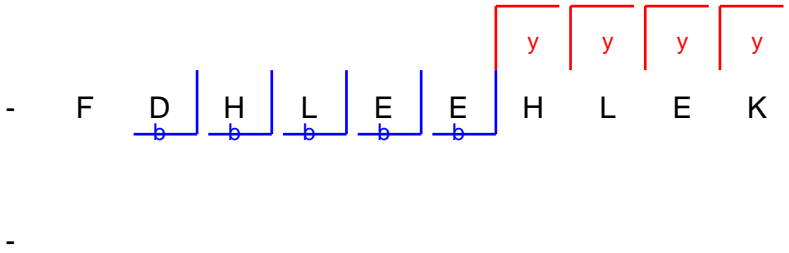



RO-QC-160121\_ZackD\_SS\_Set\_02\_Fractio 20175 FTMS; HC 118.37 712.41 REEP1

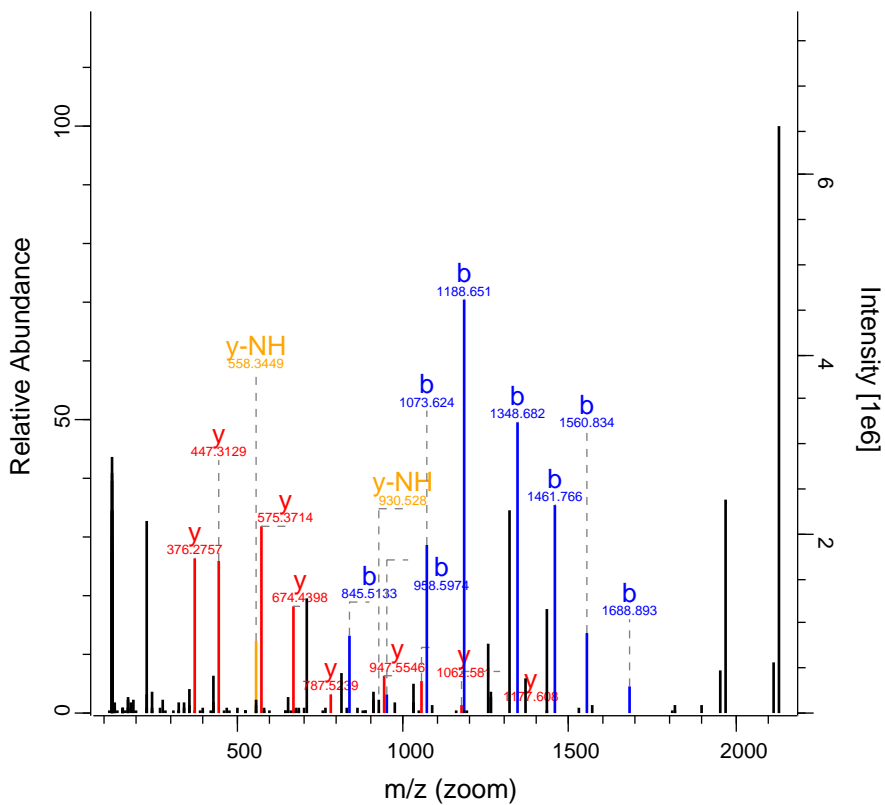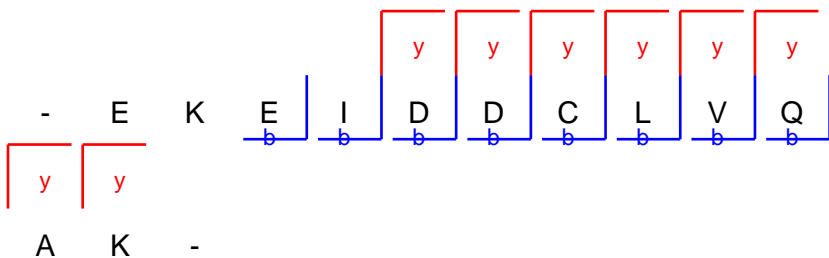



RO-QC-160121\_ZackD\_SS\_Set\_02\_Fraction 20300 FTMS; HC 38.27 723.36 SVEP1

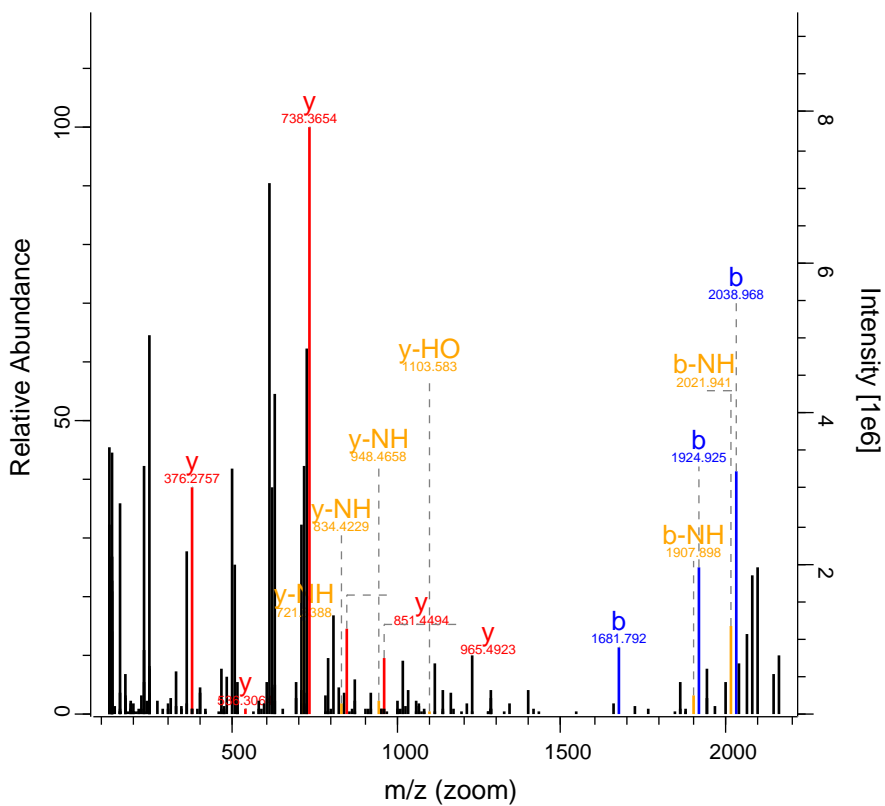

- L C P S G M Y T E Y  
 I H S R N I S D C K -

Fragmentation diagram showing peptide sequence I H S R N I S D C K - and corresponding y-ions (red) and b-ions (blue) indicated by brackets below the sequence. The y-ions are labeled 'y' and the b-ions are labeled 'b'. The fragmentation pattern is consistent with the protein sequence LCP-SGMYT-EY and the peptide sequence IHSR-NISK.

RO-QC-160121\_ZackD\_SS\_Set\_02\_Fractio 20643 FTMS; HC 112.84 423.25 ZNF536

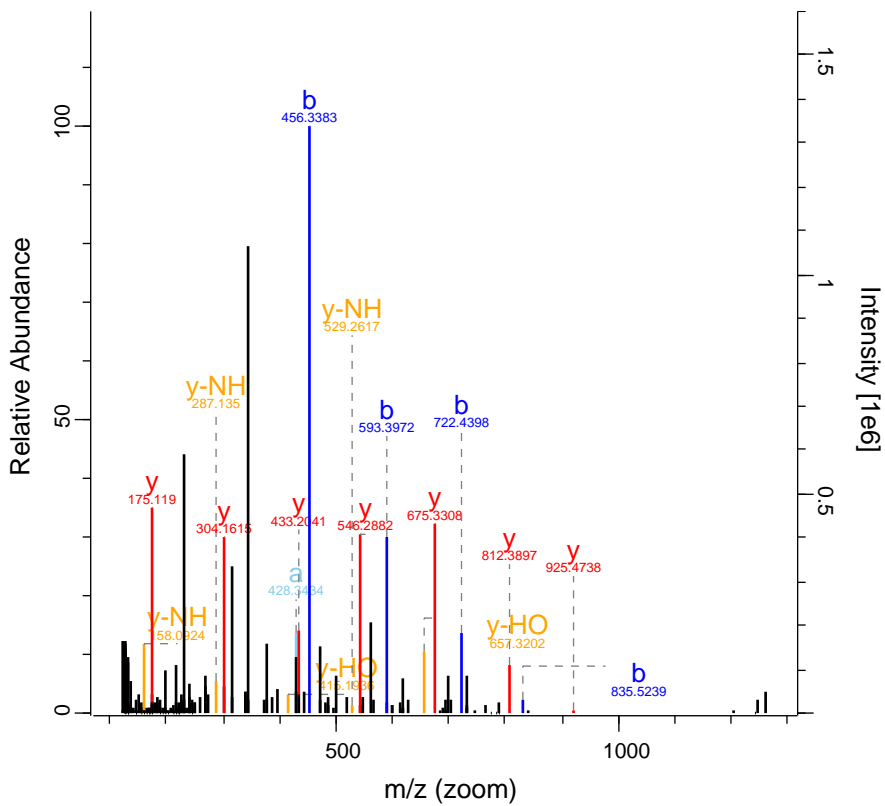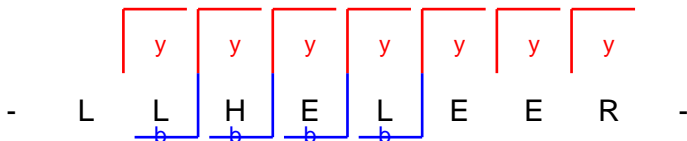

| Raw File                                | Scan  | Method    | Score | m/z    |
|-----------------------------------------|-------|-----------|-------|--------|
| RO-QC-160121_ZackD_SS_Set_02_Fraction_1 | 21849 | FTMS; HCD | 95.1  | 892.47 |

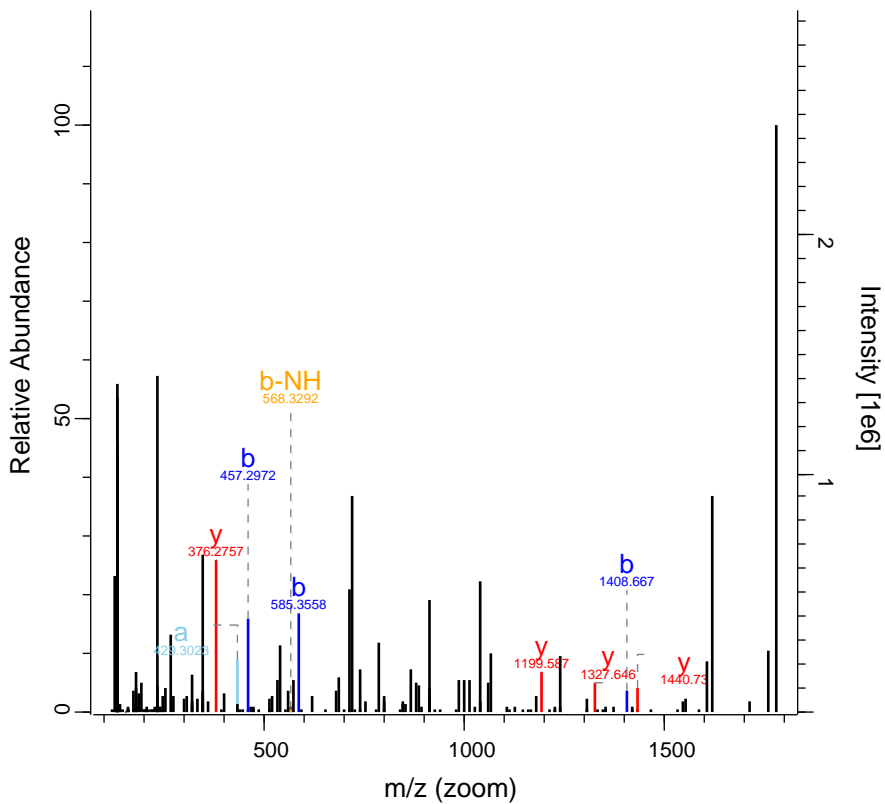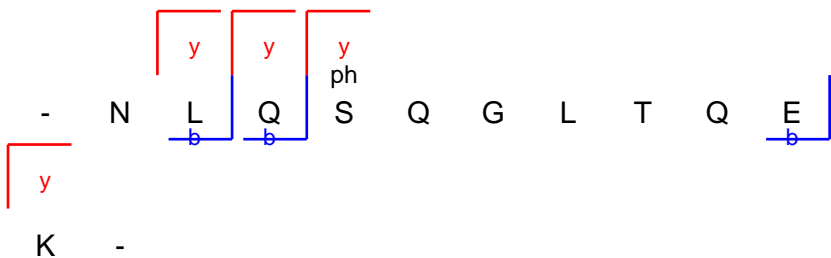

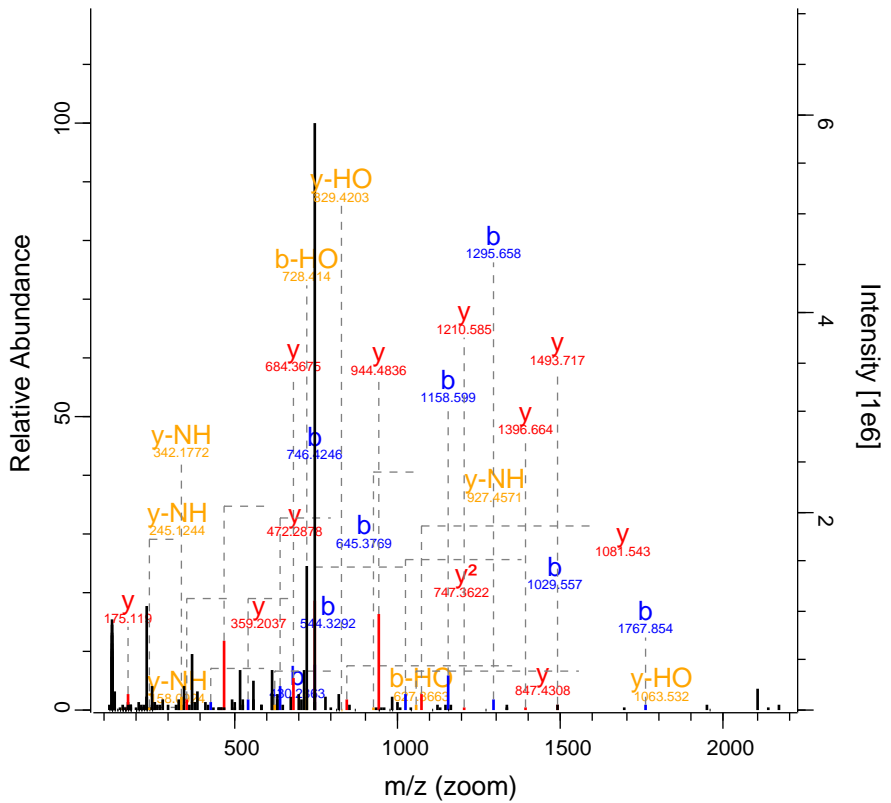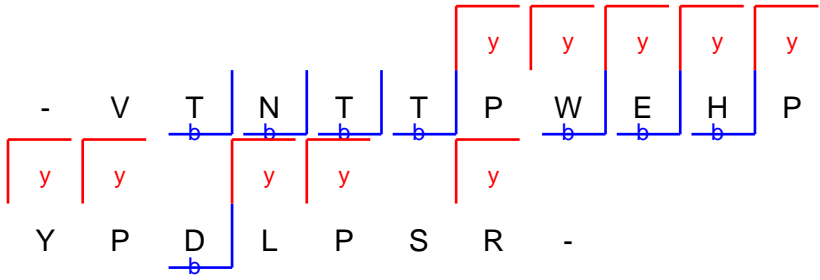





RO-QC-160121\_ZackD\_SS\_Set\_02\_Fraction 23817 FTMS; HC 97.46 846.47 METTL18

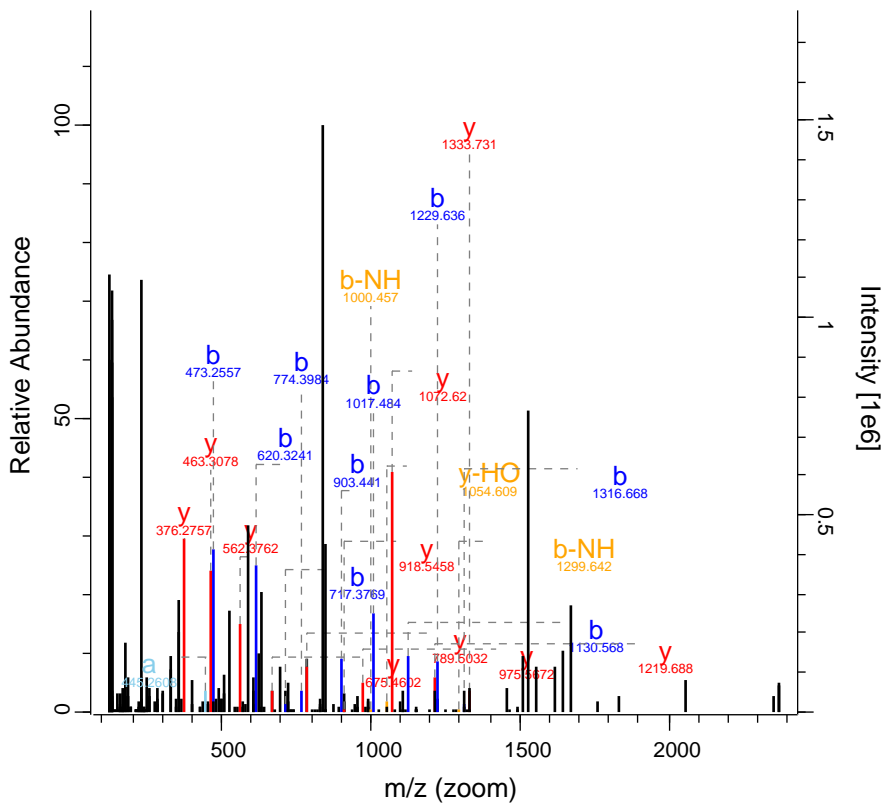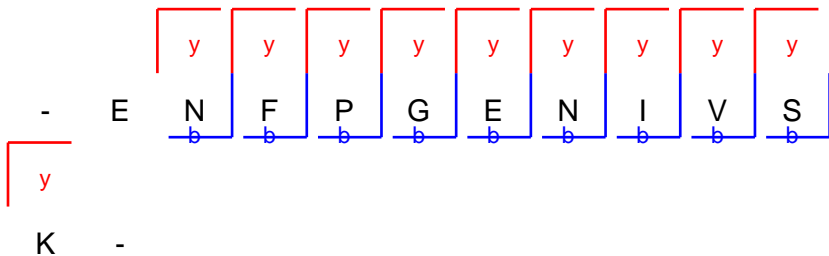

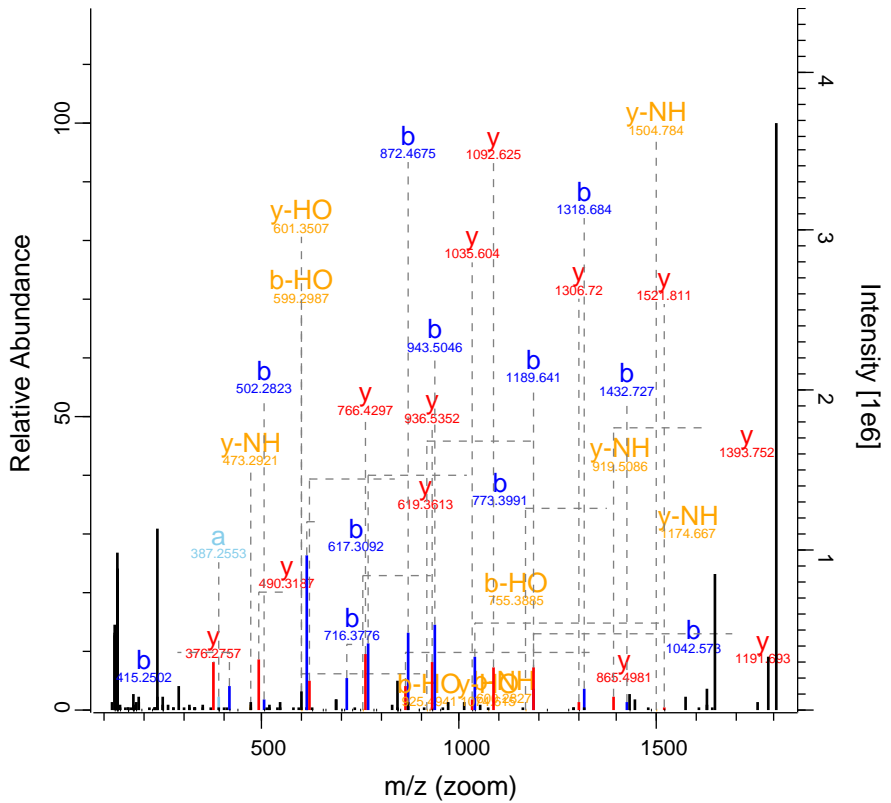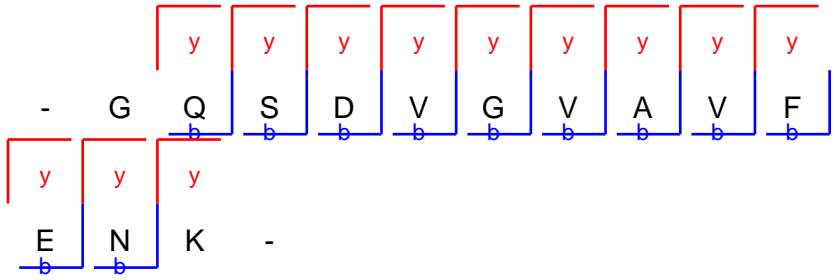

Raw File

Scan Method Score m/z

RO-QC-160121\_ZackD\_SS\_Set\_02\_Fraction\_1

24187 FTMS; HCD 56.26 875.49

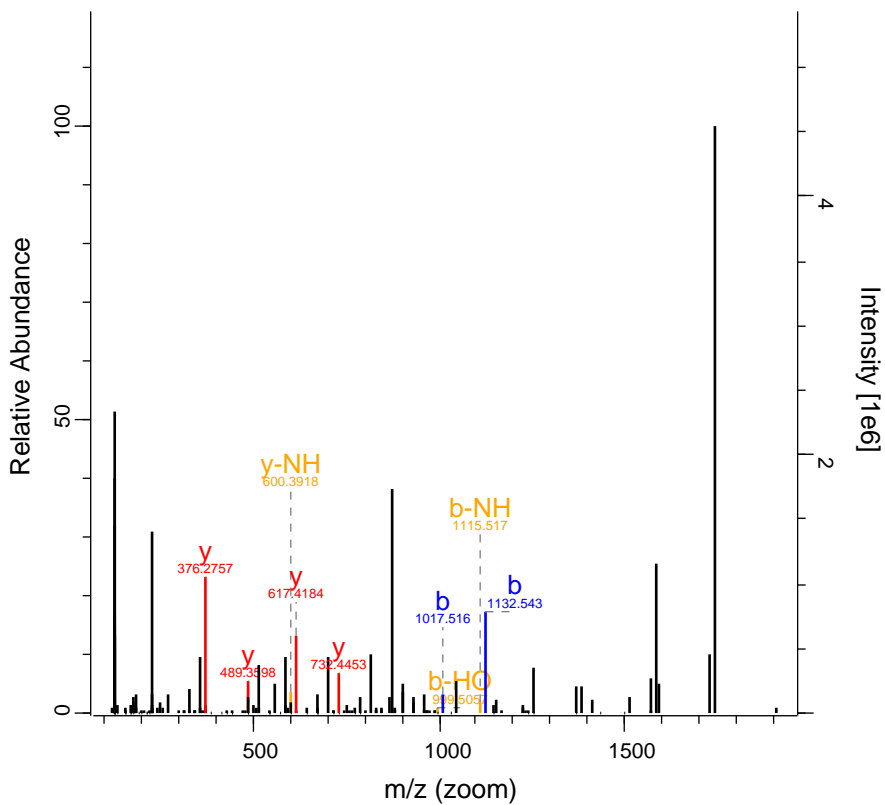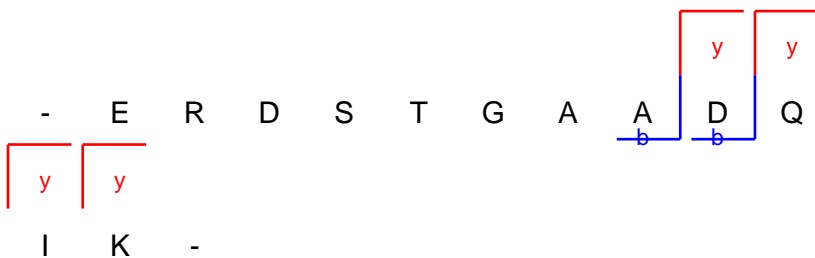



RO-QC-160121\_ZackD\_SS\_Set\_02\_Fraction 24955 FTMS; HCl 89.8 762.4 EVA1A

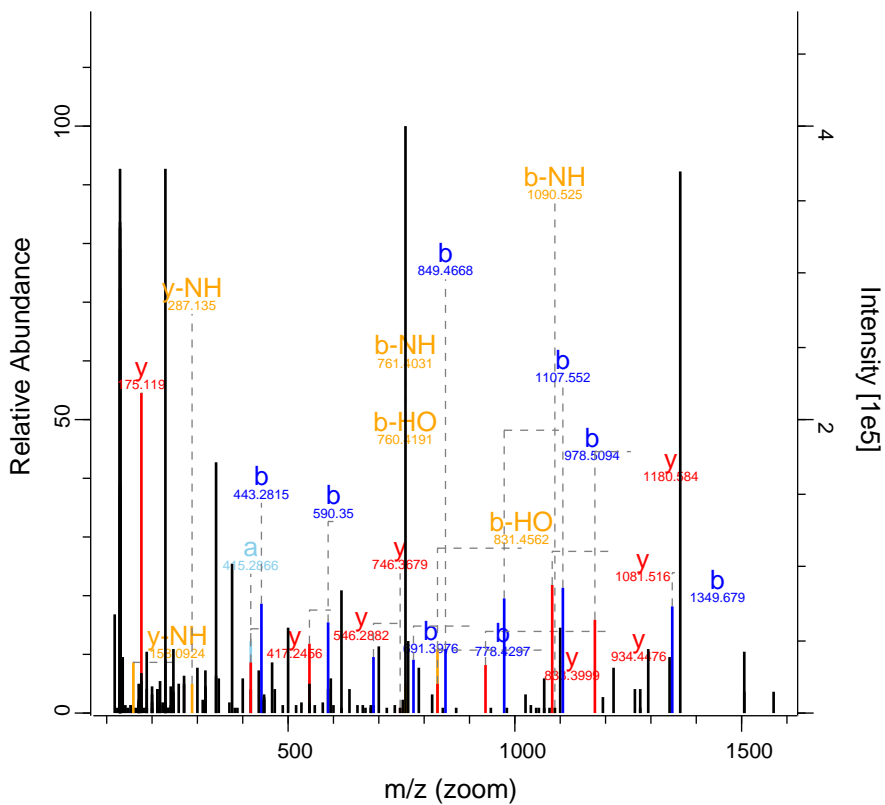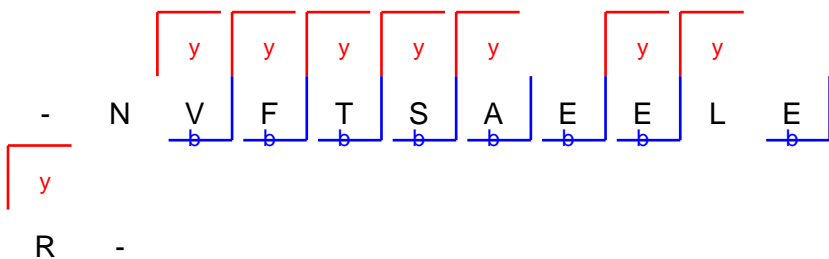

RO-QC-160121\_ZackD\_SS\_Set\_02\_Fractio 26324 FTMS; HC 115.91 687.88 FIZ1

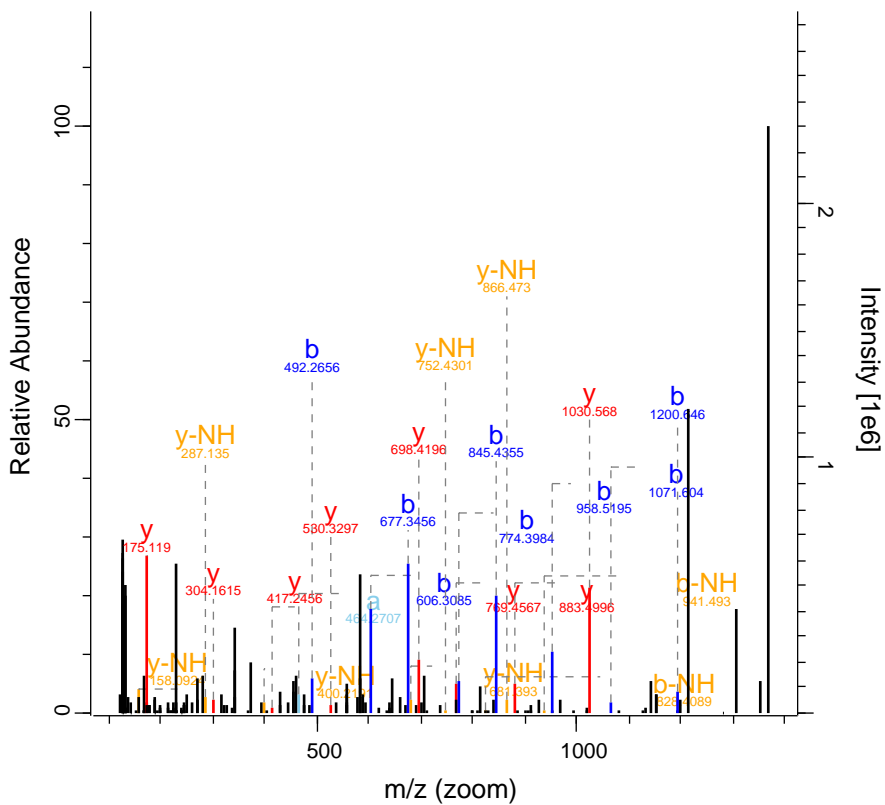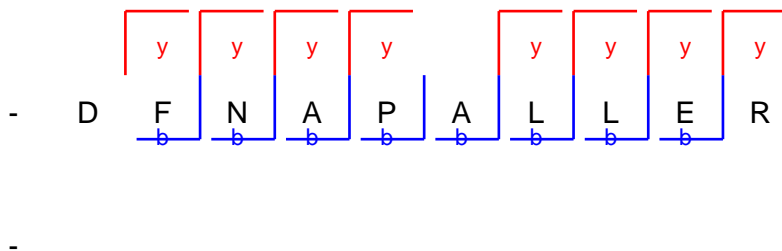

RO-QC-160121\_ZackD\_SS\_Set\_02\_Fractio 26329 FTMS; HC 113.41 702.92 CHRDL1

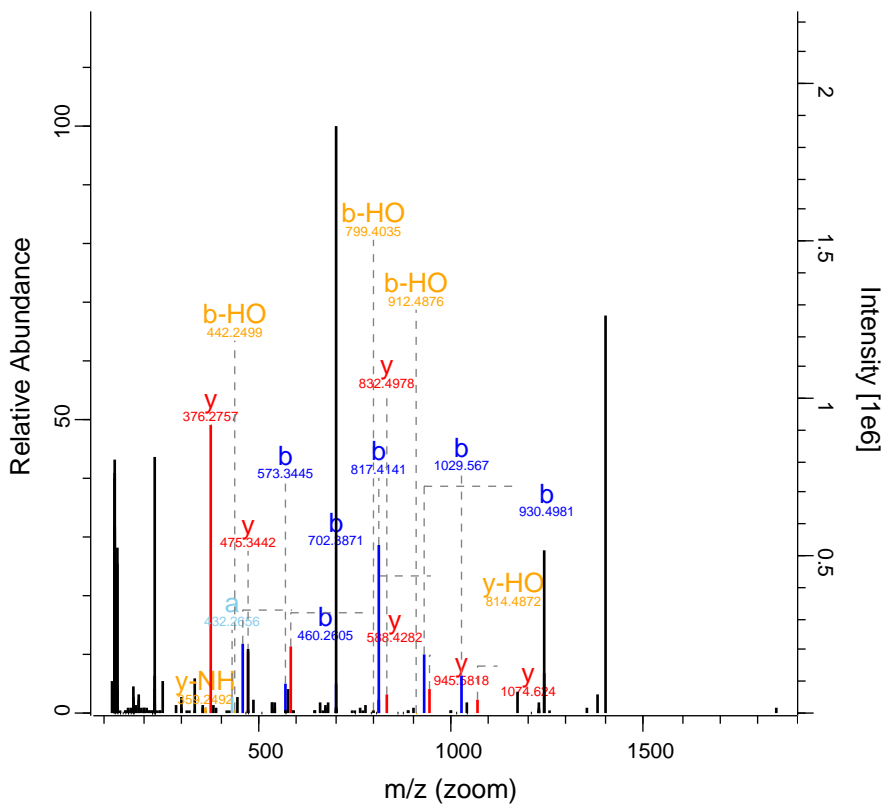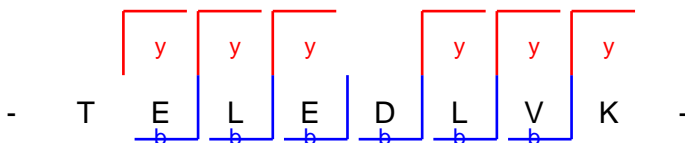



RO-QC-160121\_ZackD\_SS\_Set\_02\_Fraction 26848 FTMS; HCl 120.32 909.8 DRAM2

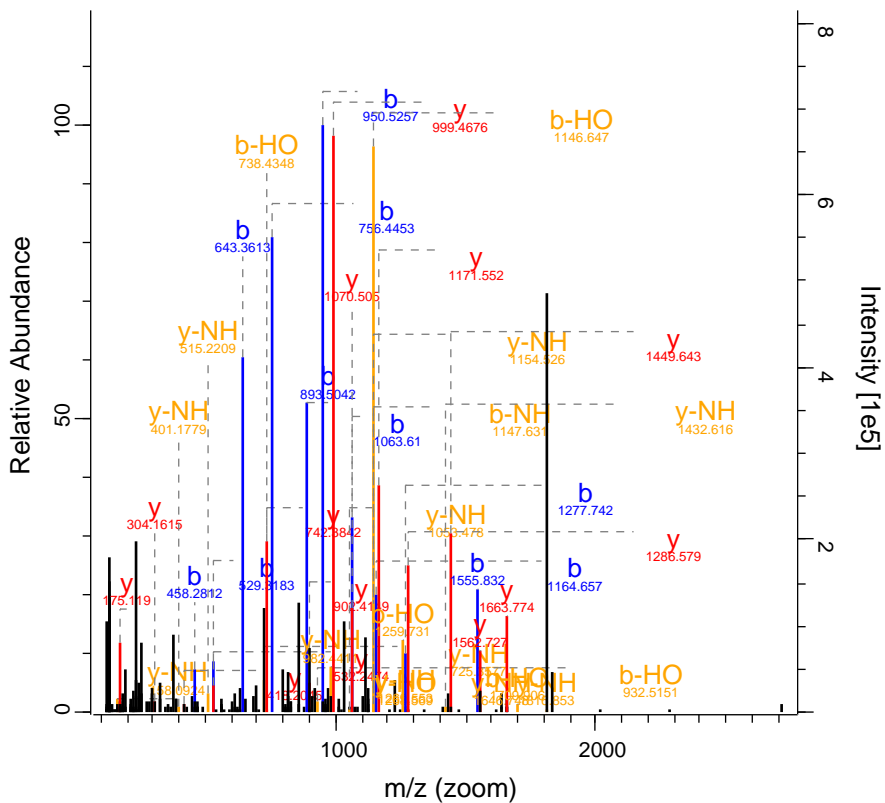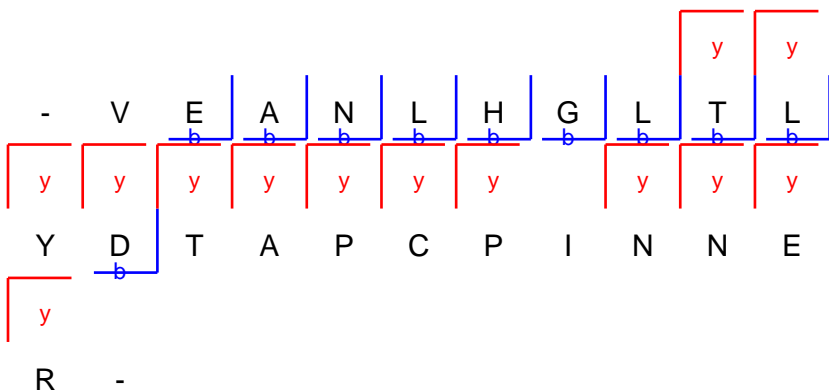

RO-QC-160121\_ZackD\_SS\_Set\_02\_Fraction 27235 FTMS; HCl 98.94 926.7 FAM58A

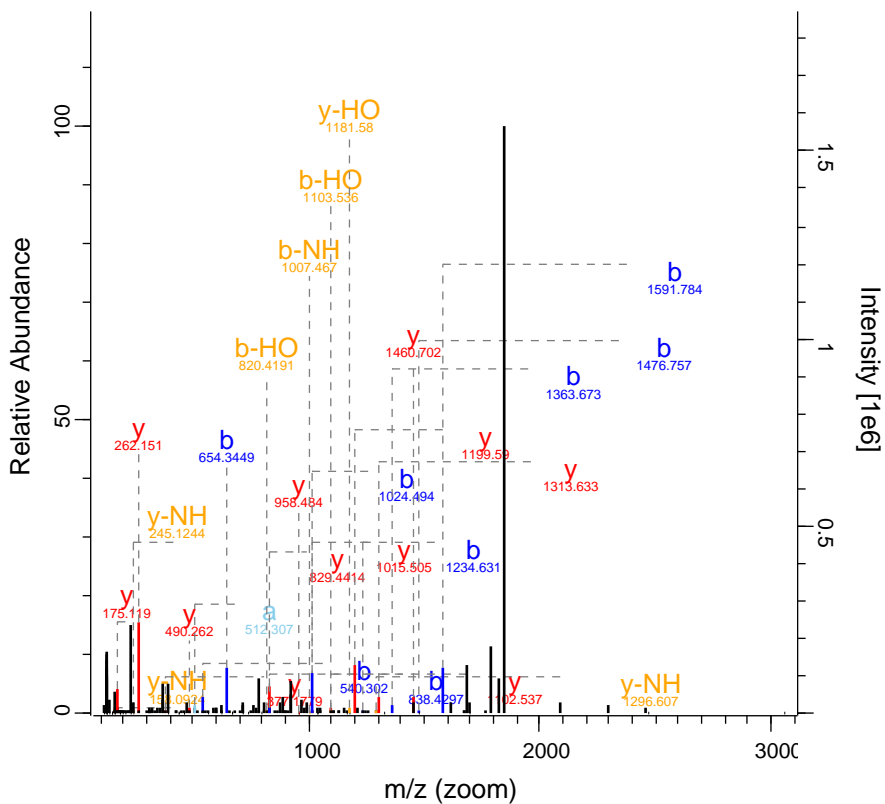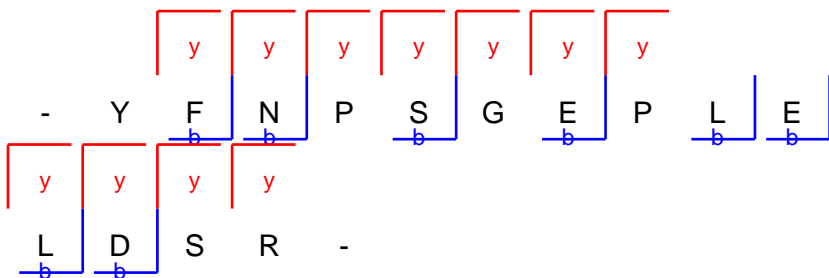



RO-QC-160121\_ZackD\_SS\_Set\_02\_Fractio 27435 FTMS; HC 108.56 612.69 PLA2G16

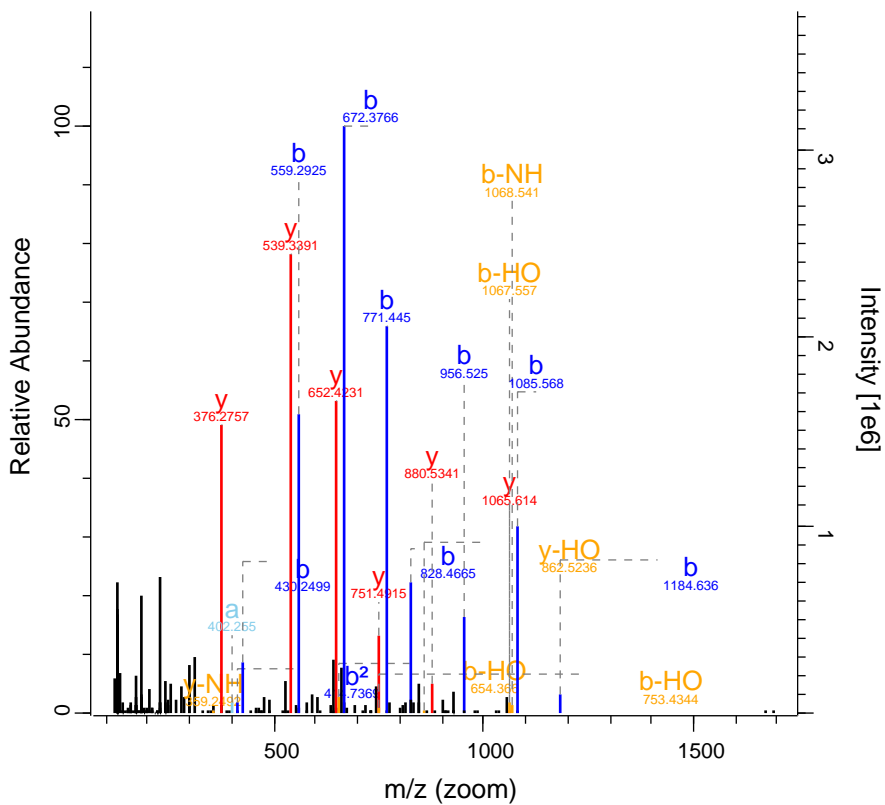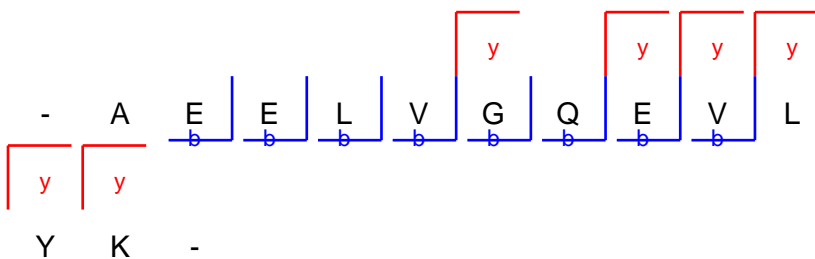

RO-QC-160121\_ZackD\_SS\_Set\_02\_Fraction 27440 FTMS; HC 59.86 849.77 SLC31A1

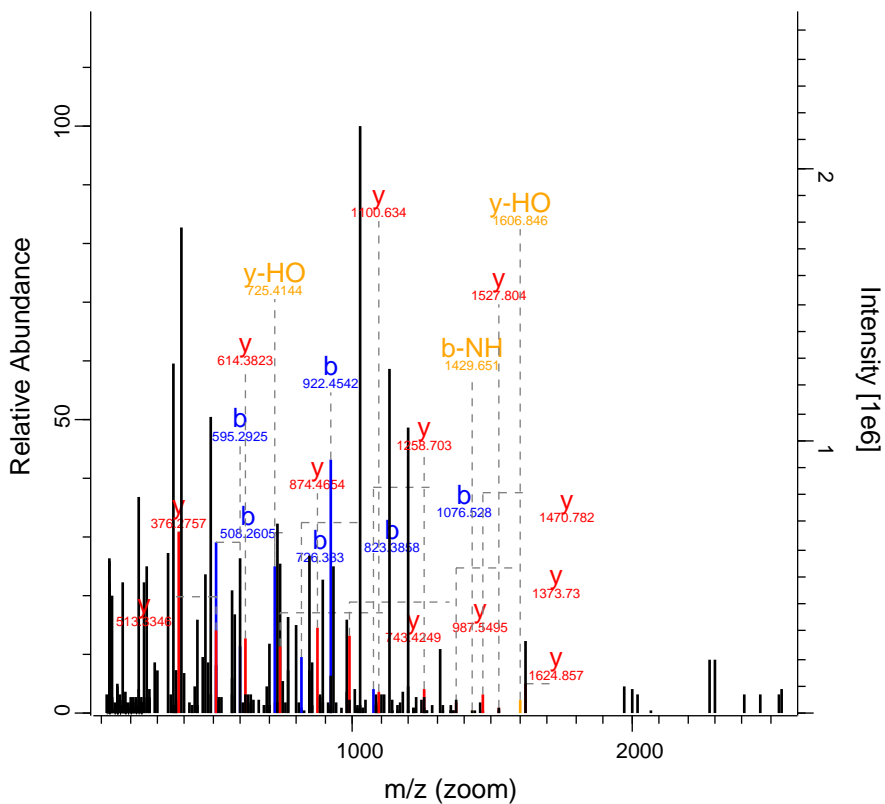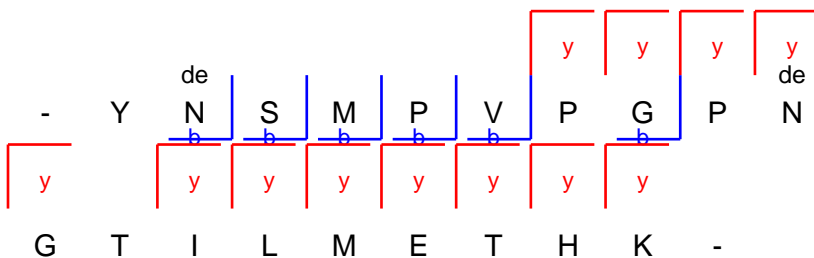

RO-QC-160121\_ZackD\_SS\_Set\_02\_Fraction 27936 FTMS; HC 96.34 531.64 MRS2

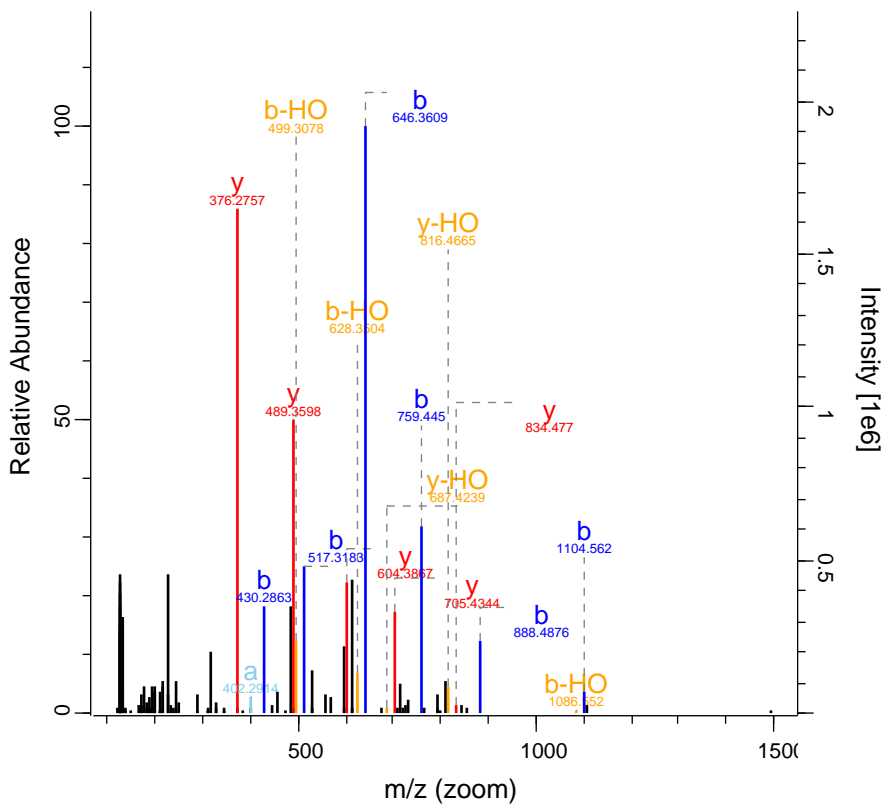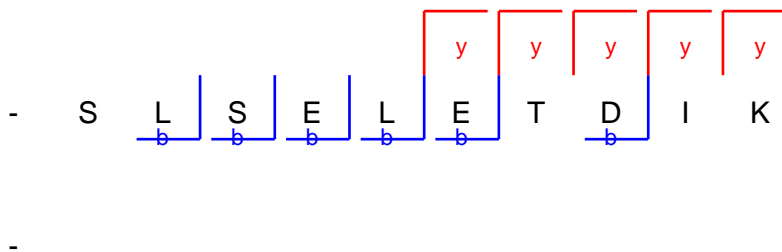

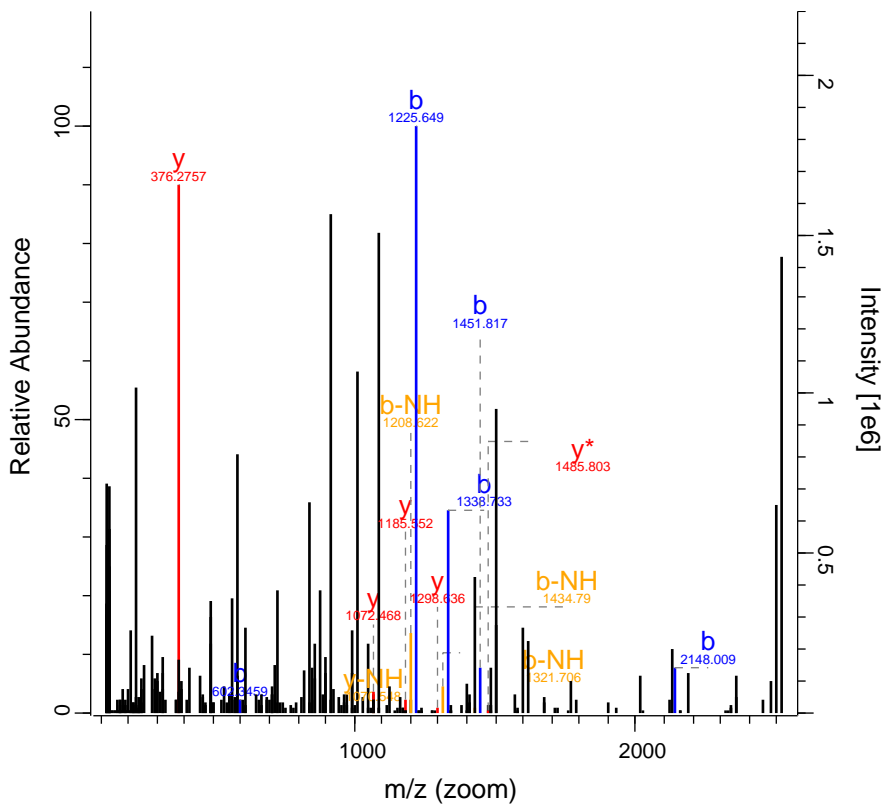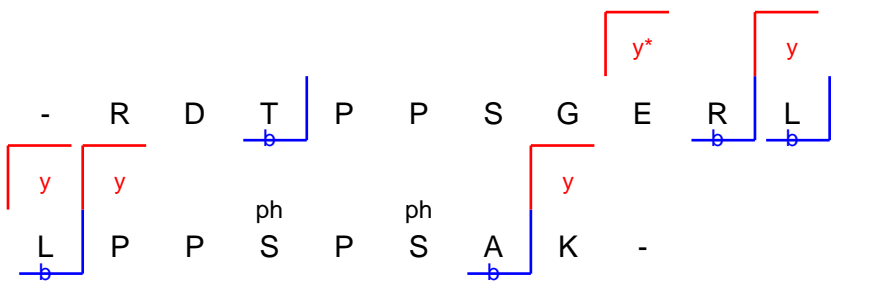





RO-QC-160121\_ZackD\_SS\_Set\_02\_Fractic 29764 FTMS; HC 91.73 1029.86 MLX

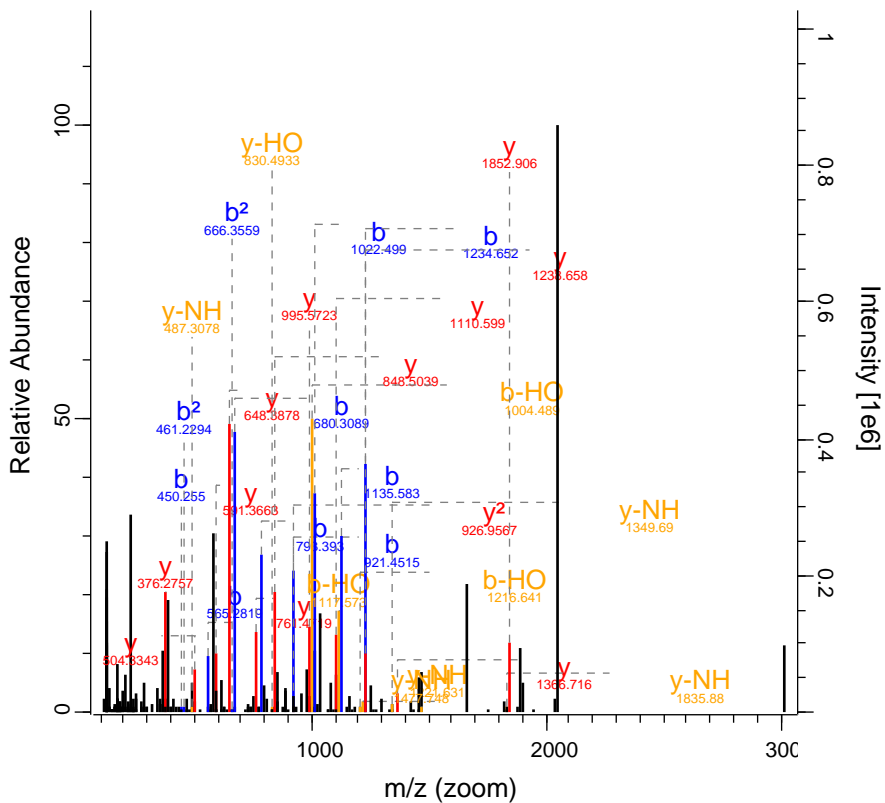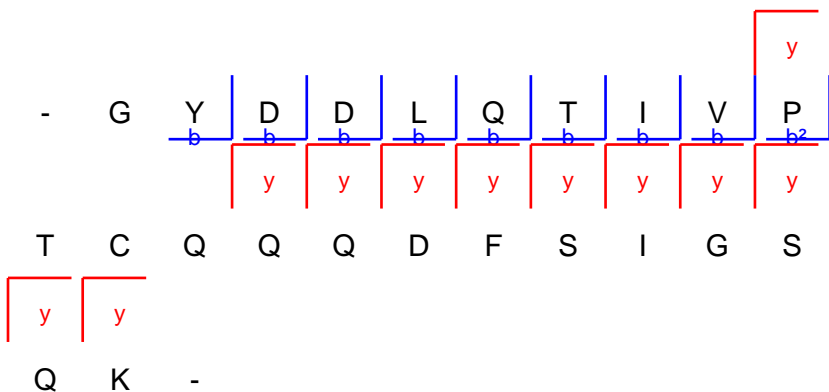

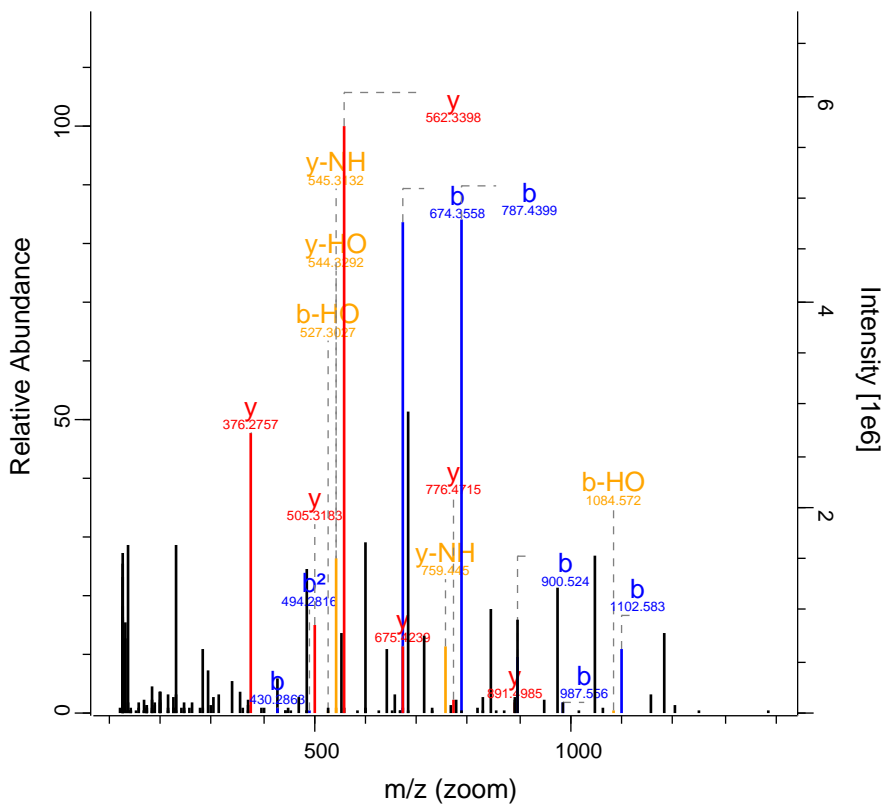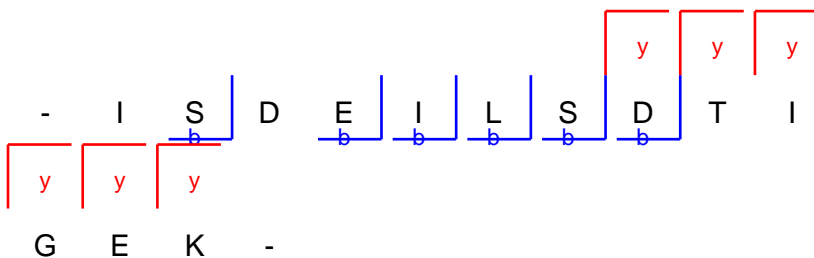

RO-QC-160121\_ZackD\_SS\_Set\_02\_Fractio 30855 FTMS; HC 197.07 939.53 TMEM184C

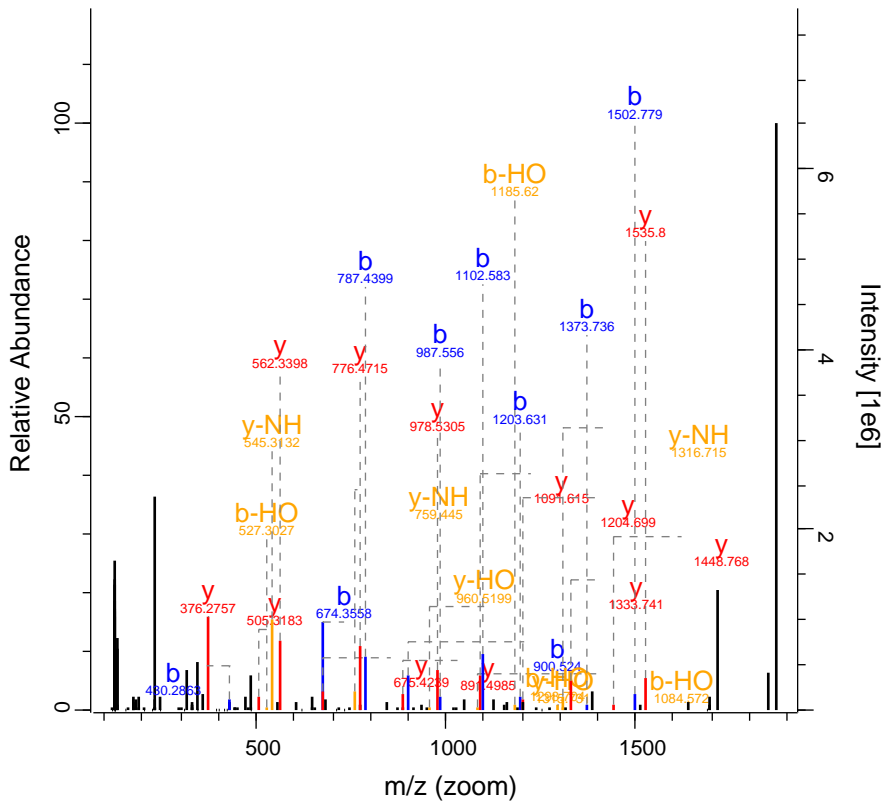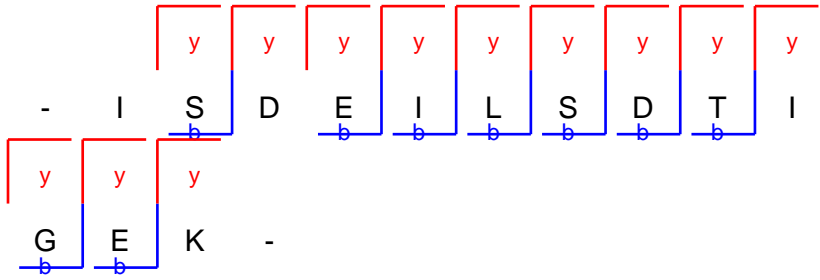

RO-QC-160121\_ZackD\_SS\_Set\_02\_Fratio 31030 FTMS; HC 105.66 626.69 TMEM184C

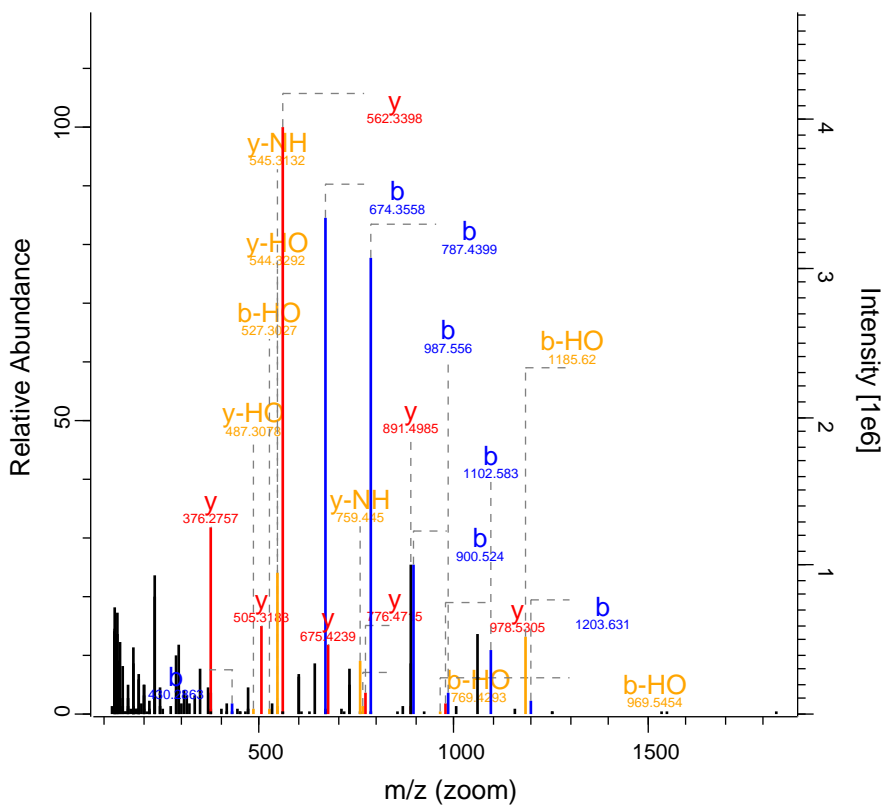

RO-QC-160121\_ZackD\_SS\_Set\_02\_Fratio 31033 FTMS; HC 123.01 940.03 TMEM184C

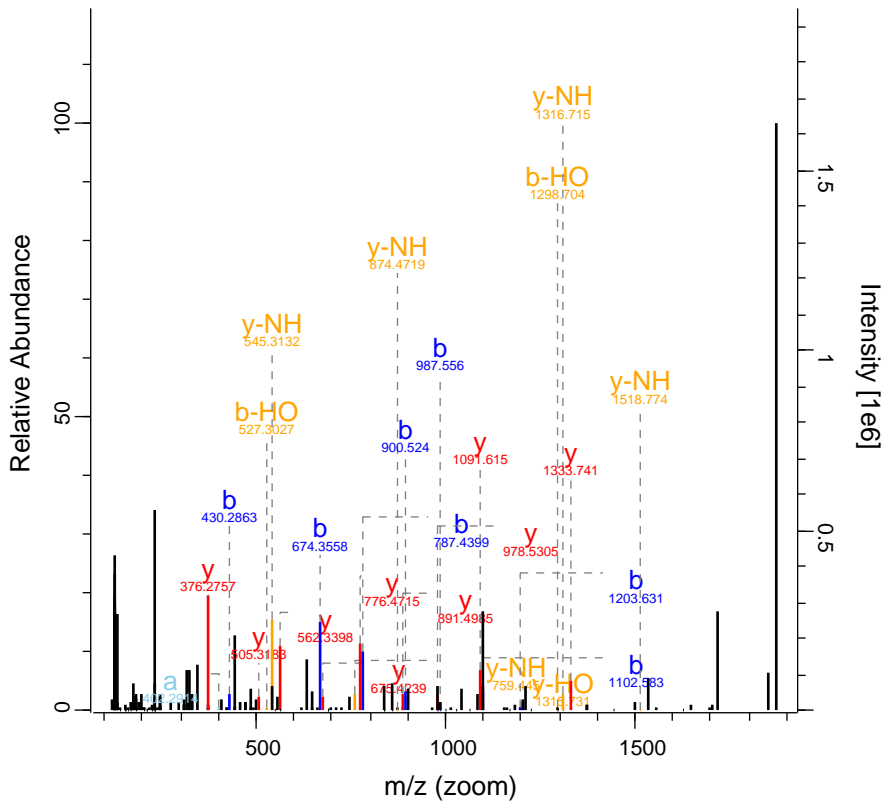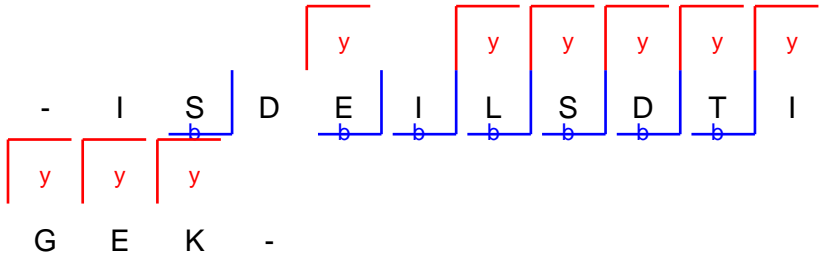

RO-QC-160121\_ZackD\_SS\_Set\_02\_Fractio 31463 FTMS; HC 133.48 715.41 BCAS4

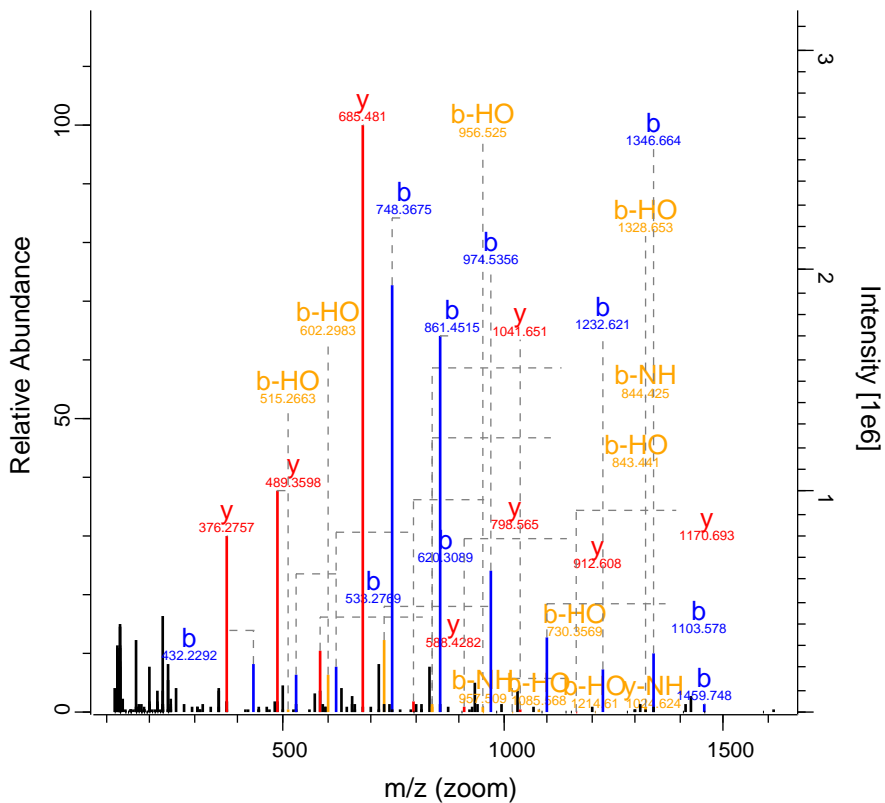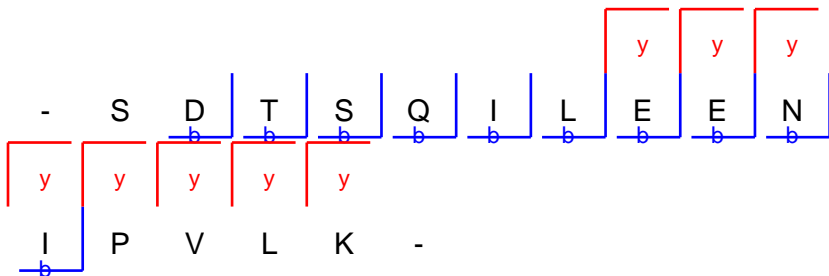

RO-QC-160121\_ZackD\_SS\_Set\_02\_Fraction 31704 FTMS; HC 98.44 741.07 SMYD2

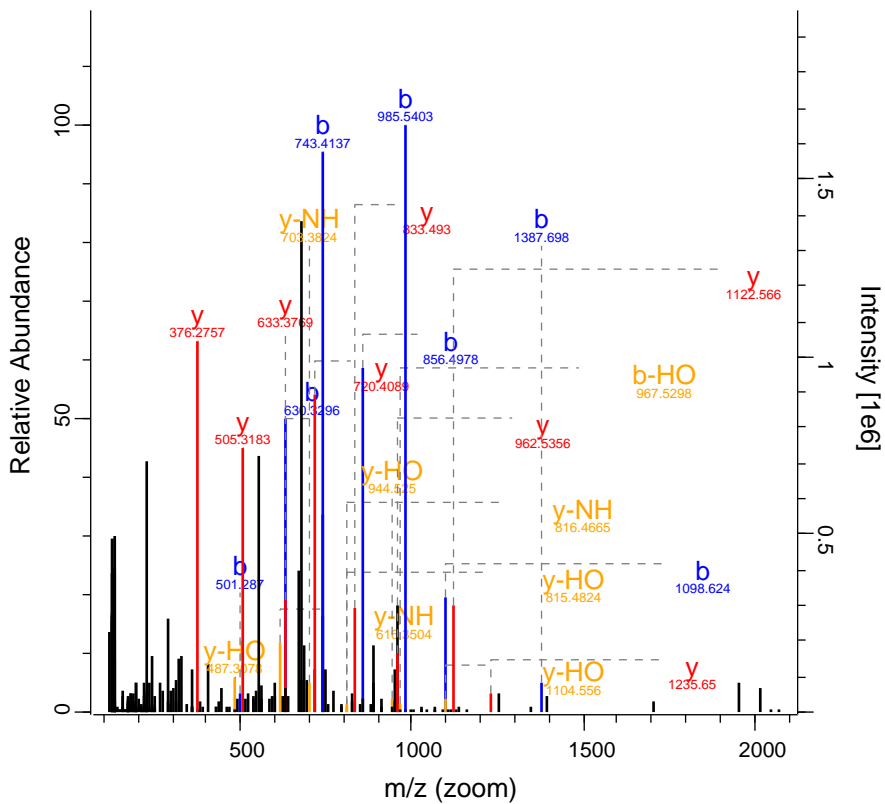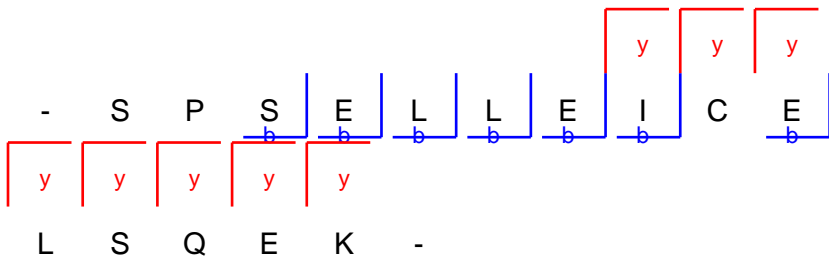

RO-QC-160121\_ZackD\_SS\_Set\_02\_Fraction 32296 FTMS; HC 91.7 881.95 R3HDM4

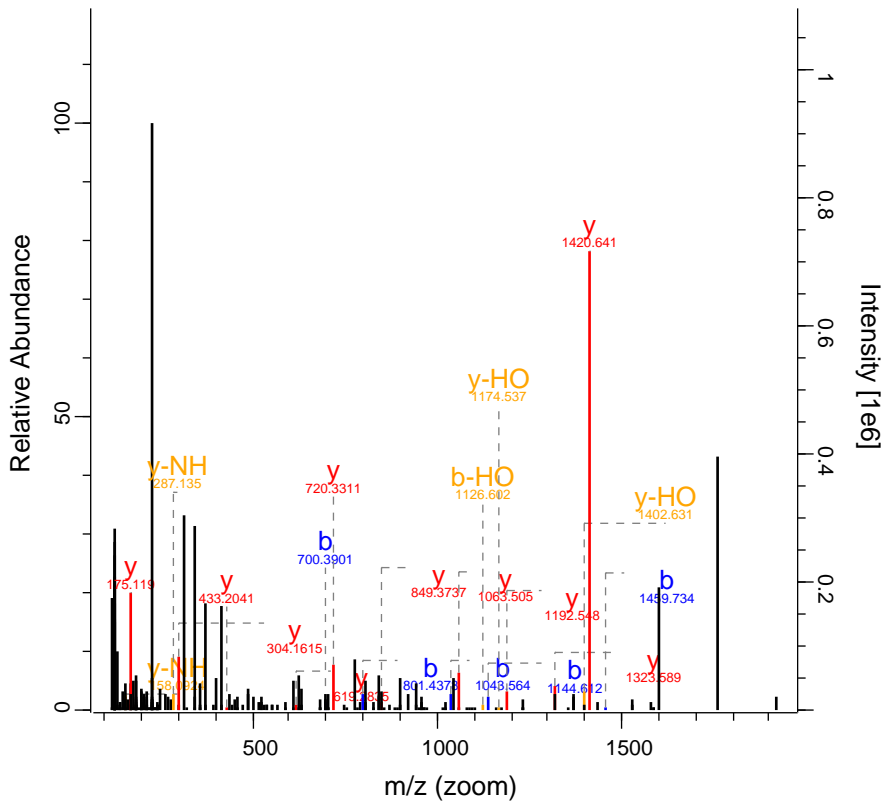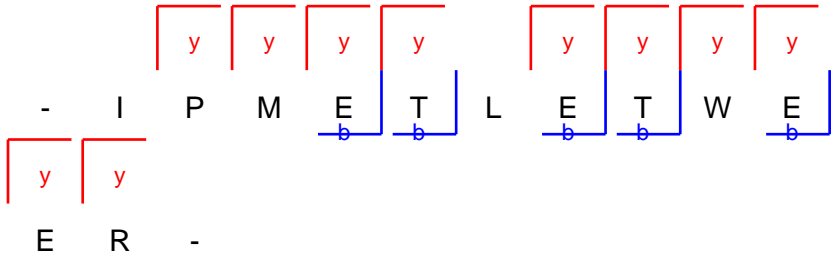



RO-QC-160121\_ZackD\_SS\_Set\_02\_Fraction 32836 FTMS; HC 73.3 761.02 VCPKMT

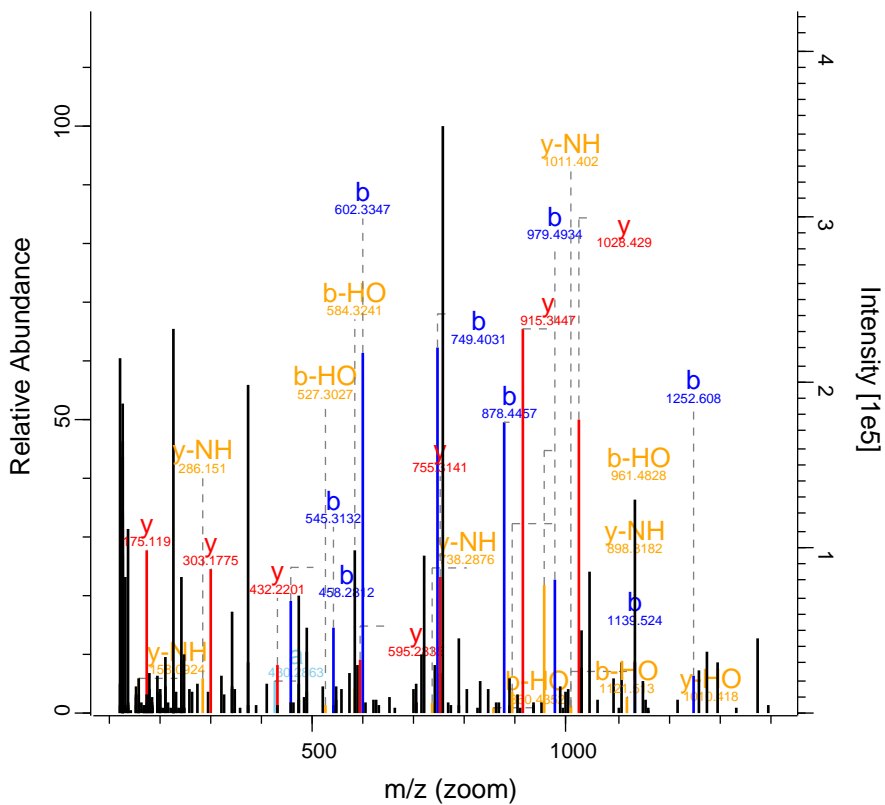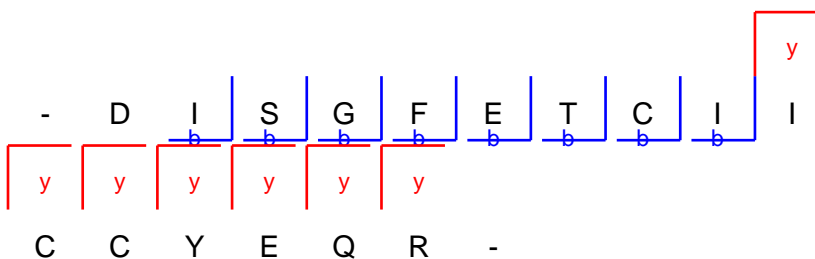

C C Y E Q R -

RO-QC-160121\_ZackD\_SS\_Set\_02\_Fractio 32999 FTMS; HC 106.58 680.03 CCDC61

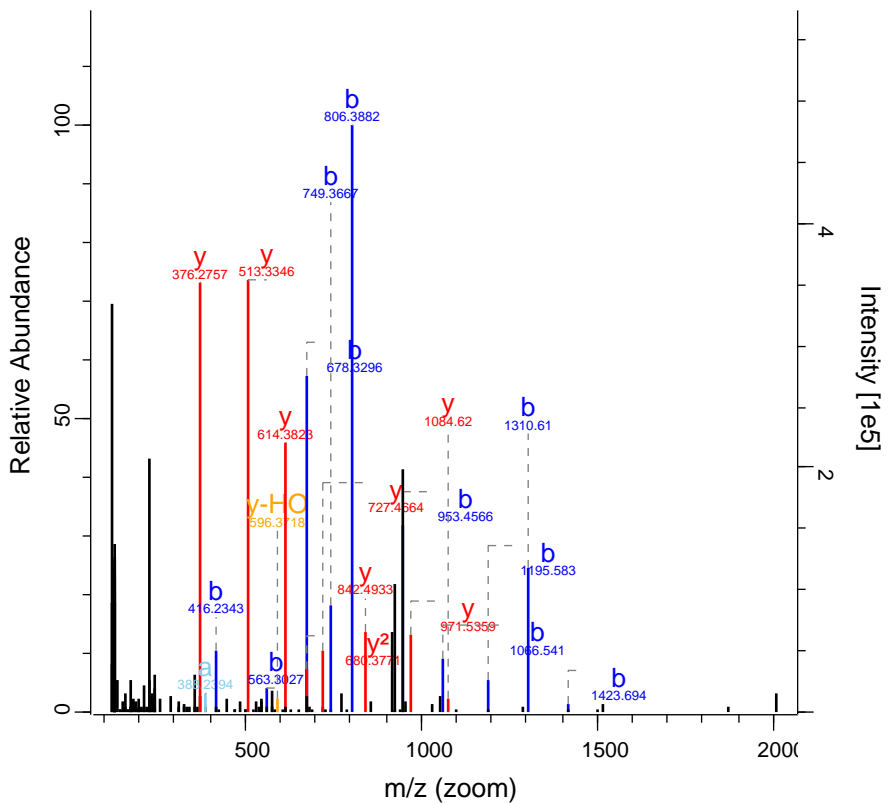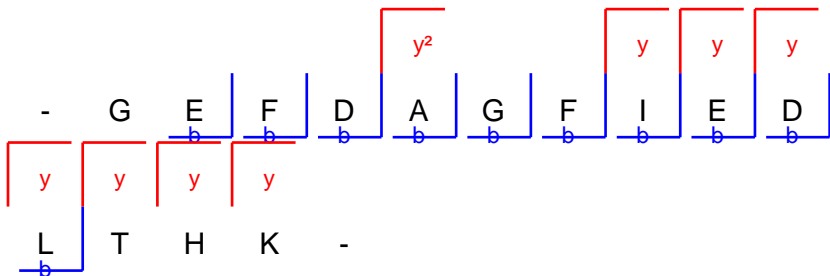

RO-QC-160121\_ZackD\_SS\_Set\_02\_Fraction 33163 FTMS; HC 97.55 680.03 CCDC61

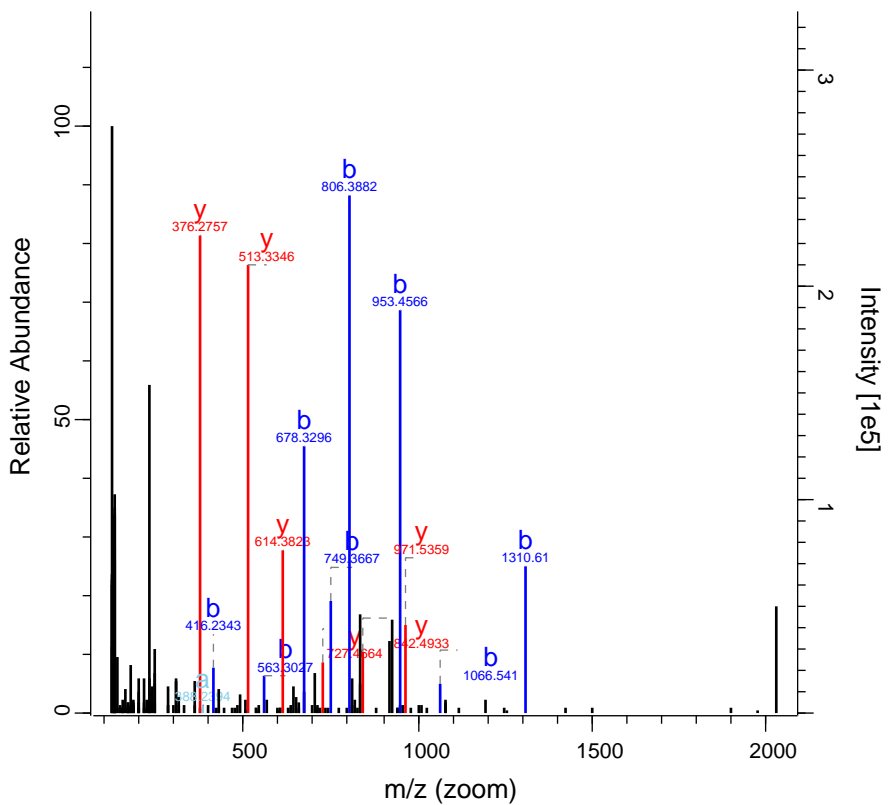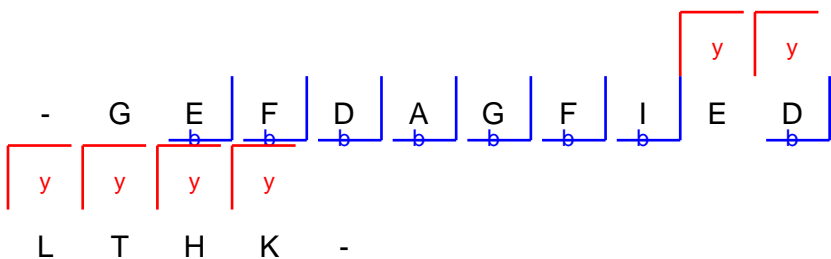

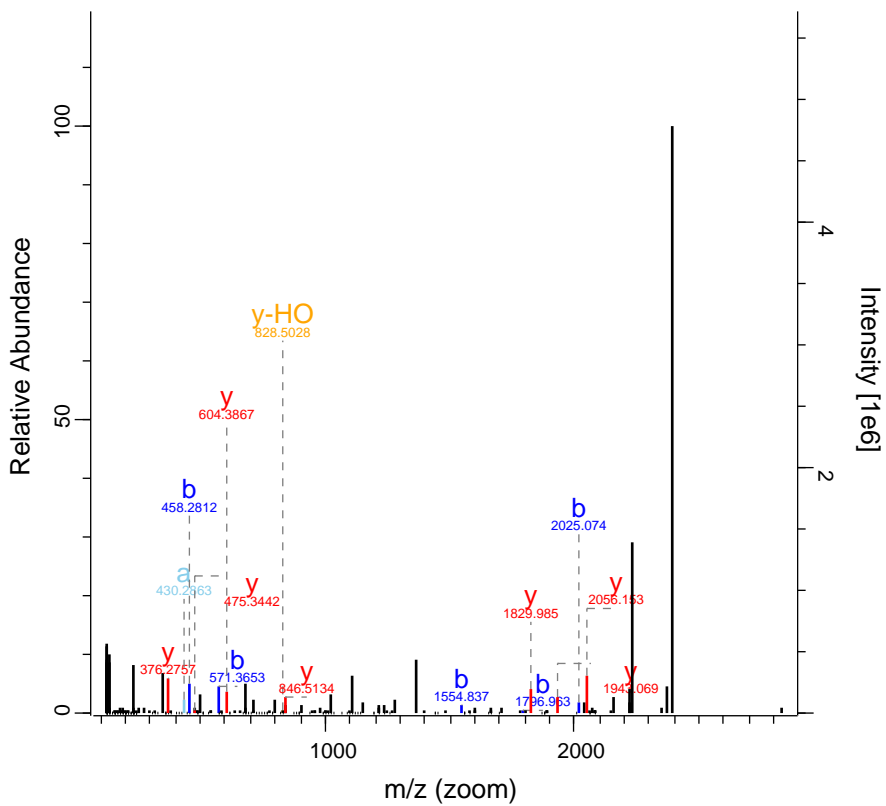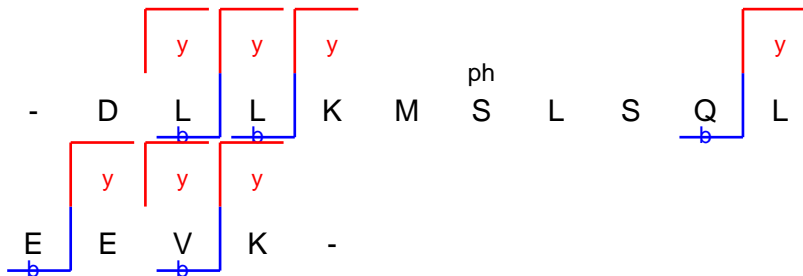

RO-QC-160121\_ZackD\_SS\_Set\_02\_Fraction 34961 FTMS; HC 56.6 728.73 MILR1

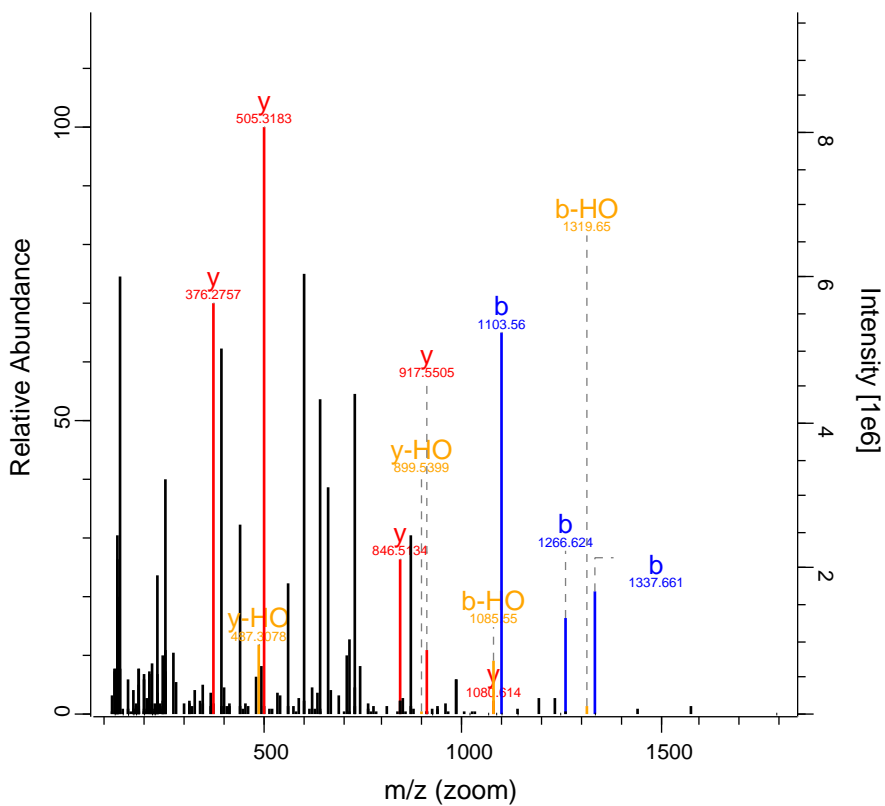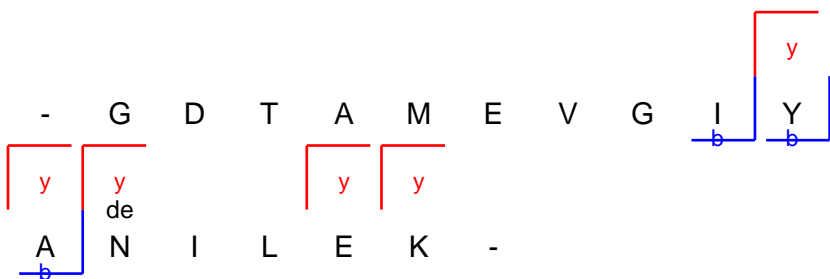

RO-QC-160121\_ZackD\_SS\_Set\_02\_Fraction 3392 FTMS; HCl 40.59 376.45 ZCCHC7

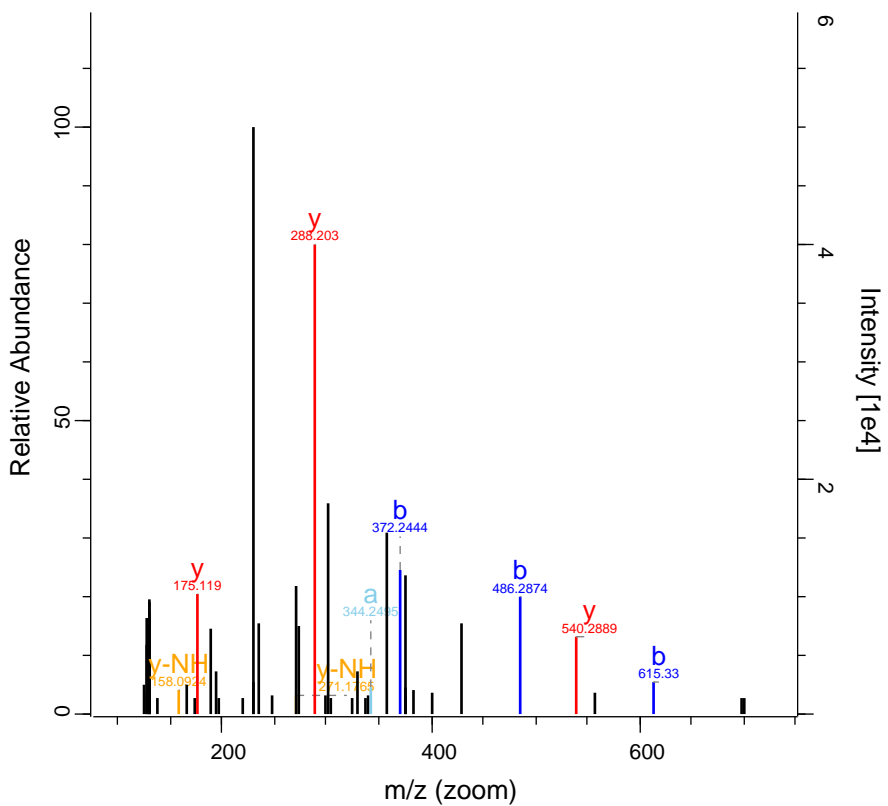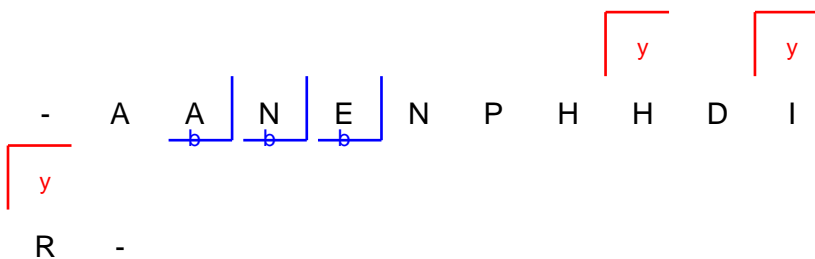

RO-QC-160121\_ZackD\_SS\_Set\_02\_Fraction 3437 FTMS; HCl 61.44 501.59 ZCCHC7

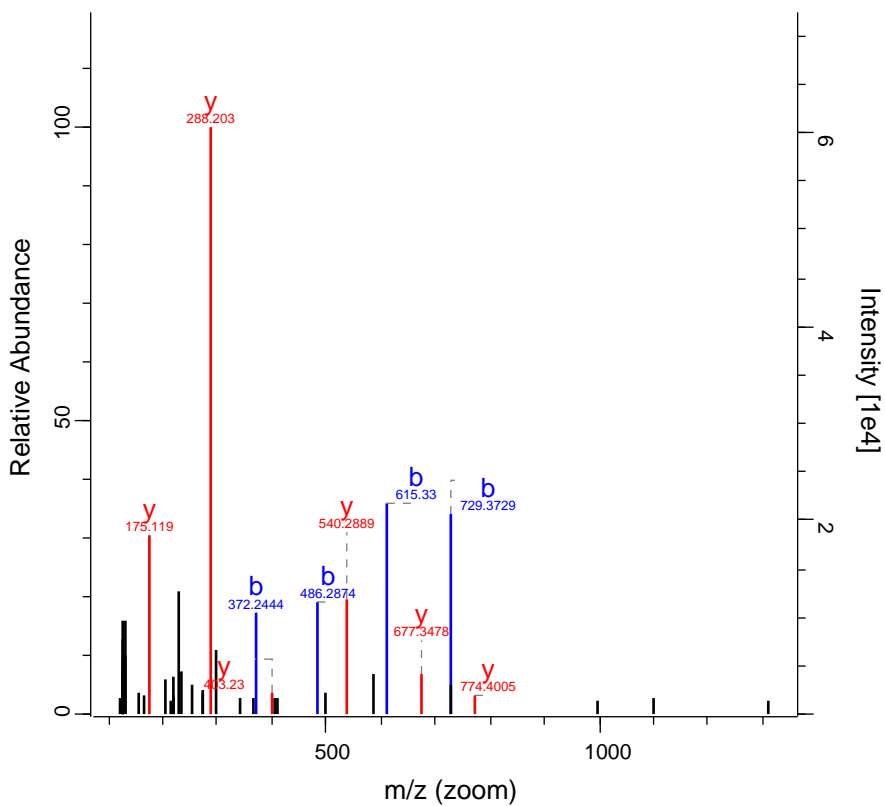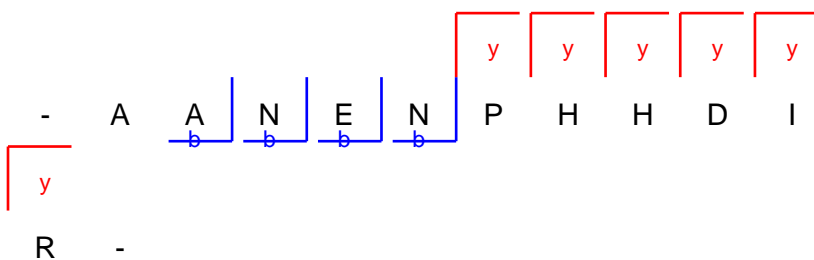

RO-QC-160121\_ZackD\_SS\_Set\_02\_Fraction 4365 FTMS; HCl 72.55 444.59 TEX30

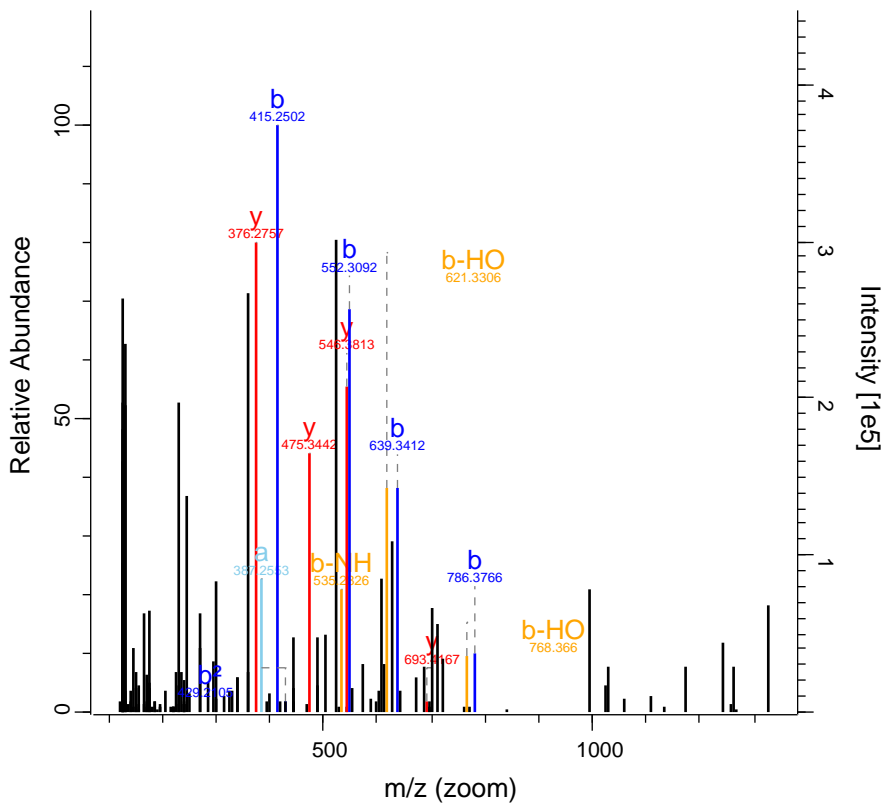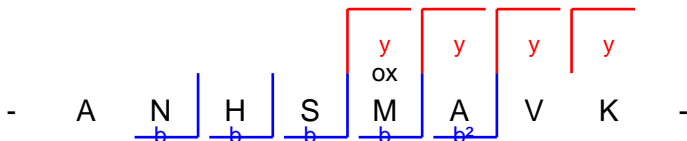



RO-QC-160121\_ZackD\_SS\_Set\_02\_Fraction 4547 FTMS; HCl 83.23 520.91 GREM1

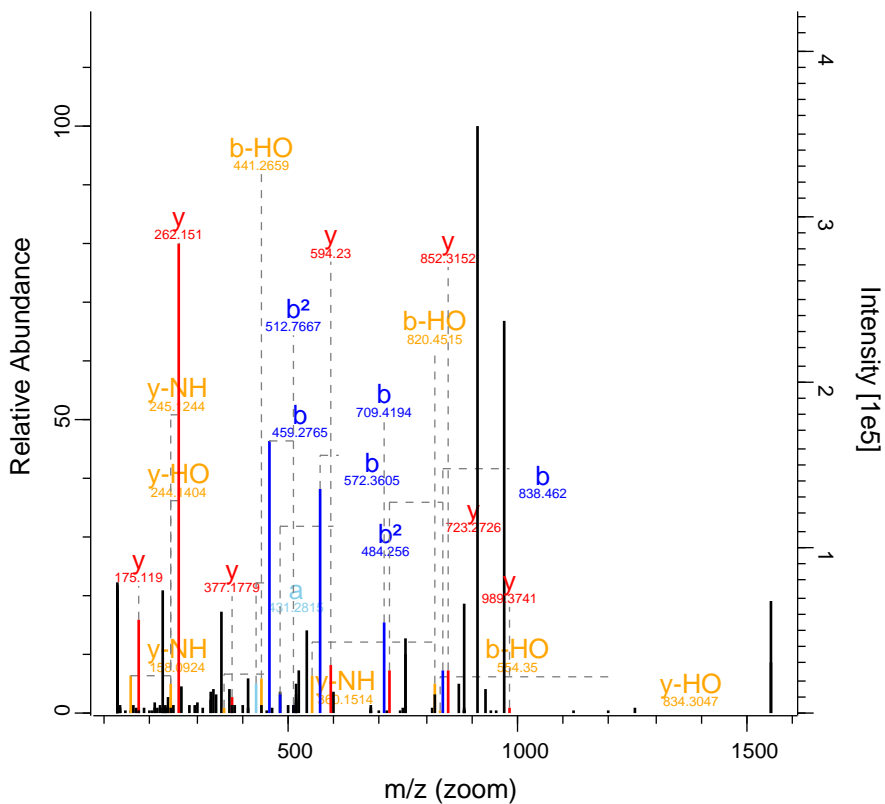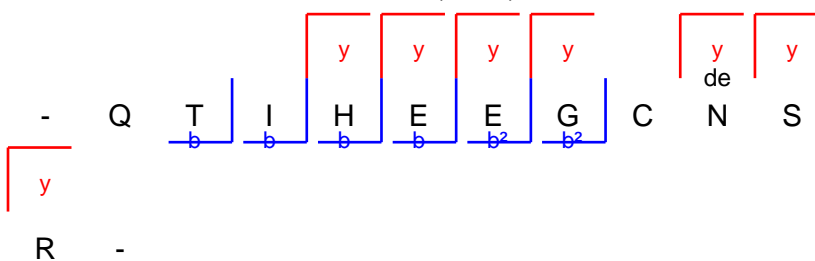

RO-QC-160121\_ZackD\_SS\_Set\_02\_Fraction 4559 FTMS; HC 118.28 646.34 DENND1B

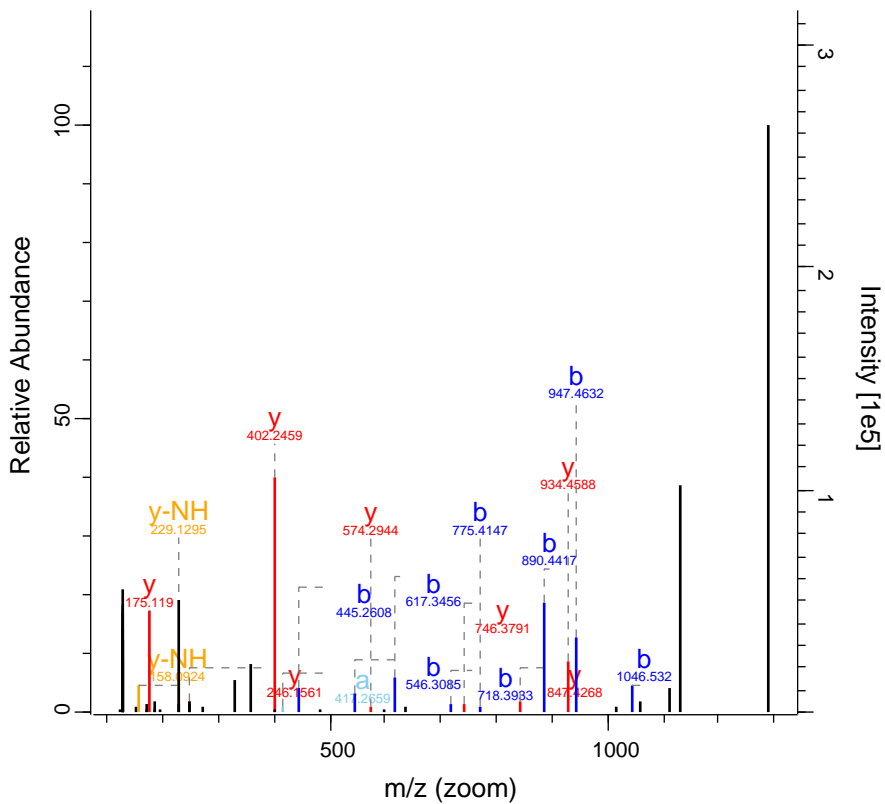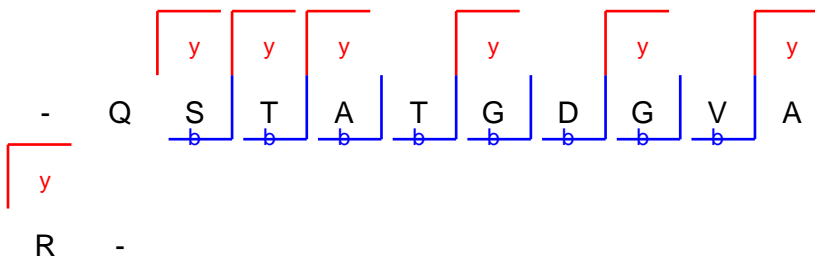

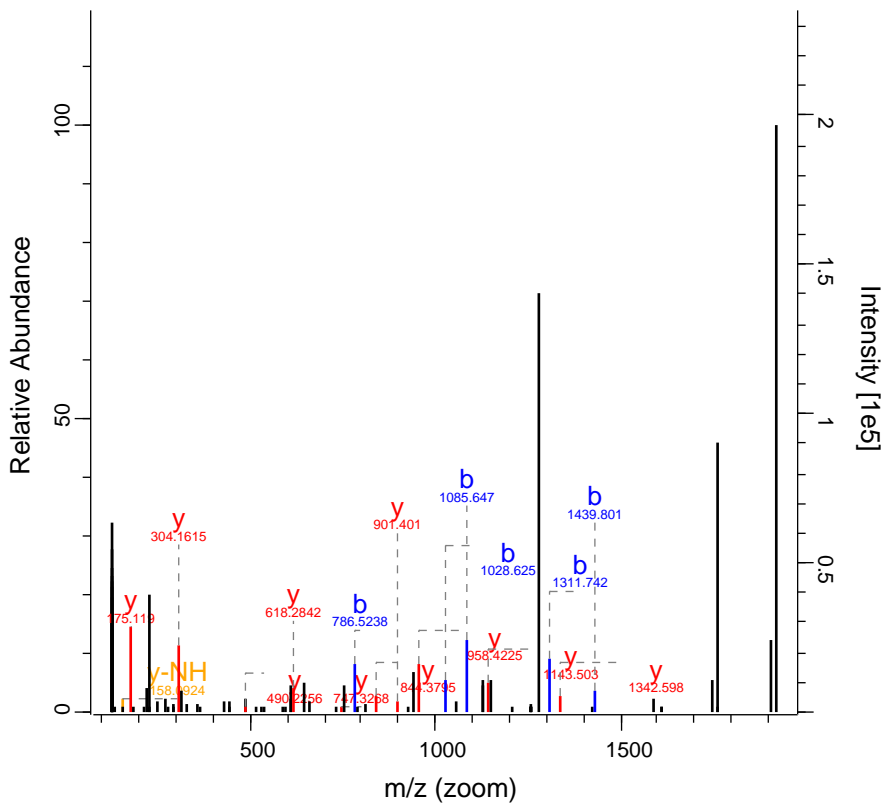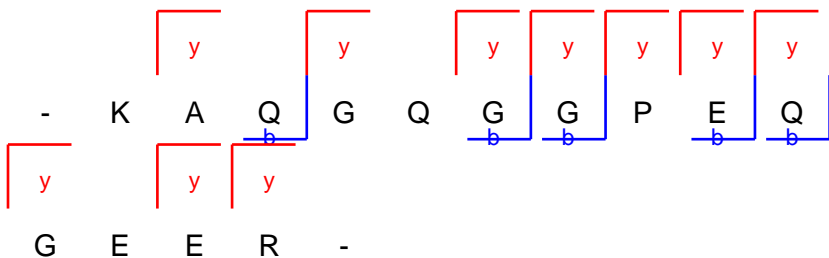

RO-QC-160121\_ZackD\_SS\_Set\_02\_Fraction 4851 FTMS; HC 120.14 640.99 RUNDC1

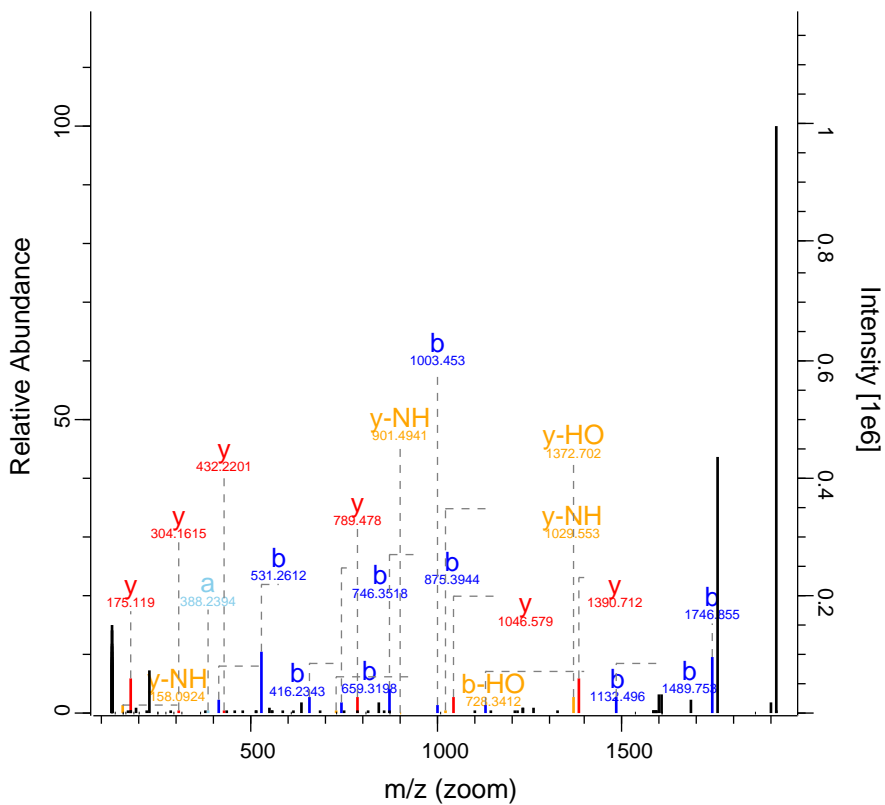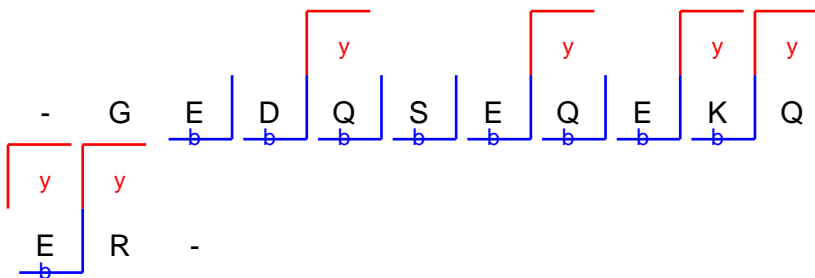



RO-QC-160121\_ZackD\_SS\_Set\_02\_Fraction 5094 FTMS; HCl 57.11 435.55 C1orf109

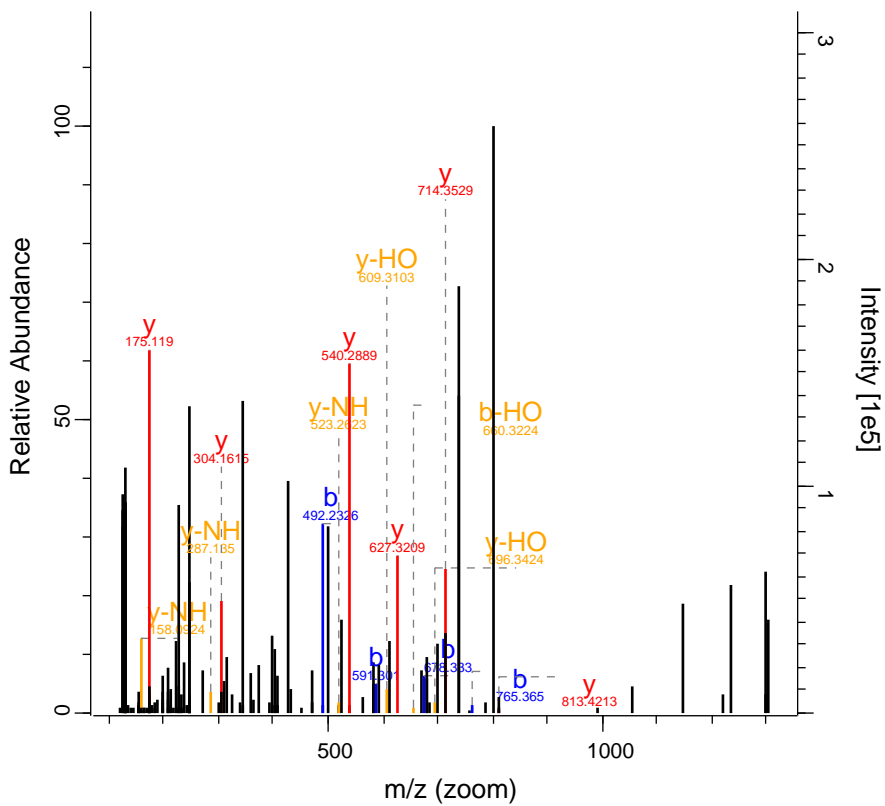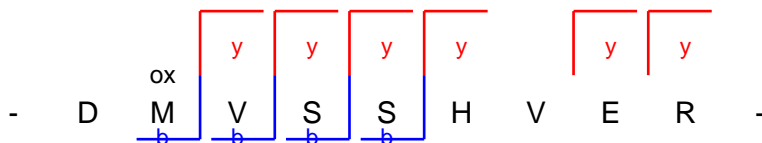

RO-QC-160121\_ZackD\_SS\_Set\_02\_Fraction 5098 FTMS; HCl 65.25 548.8 WIPF1

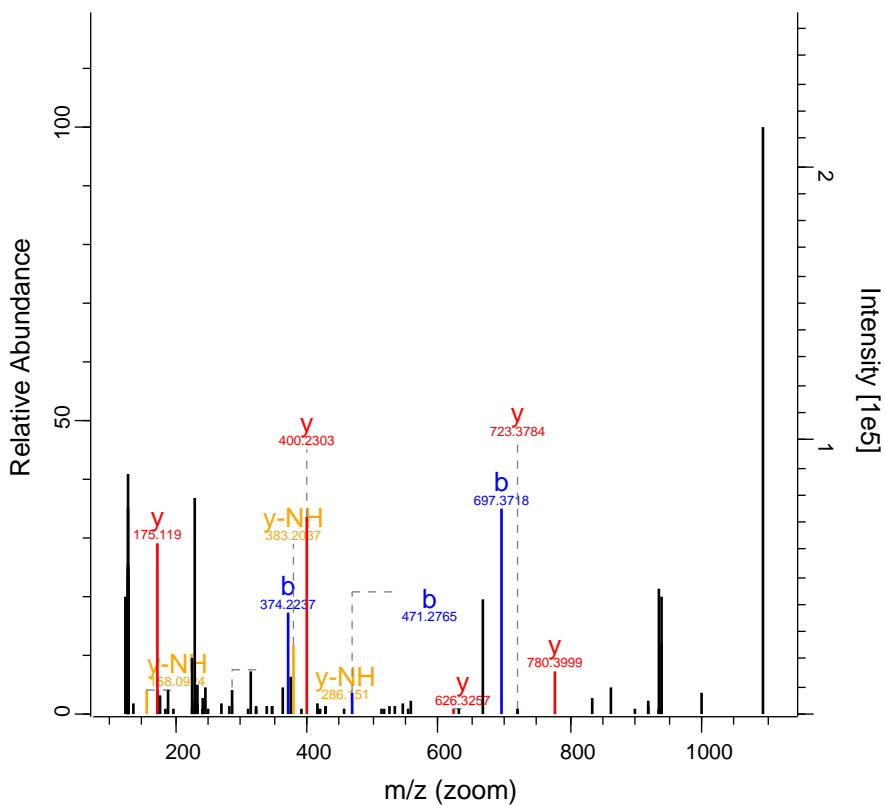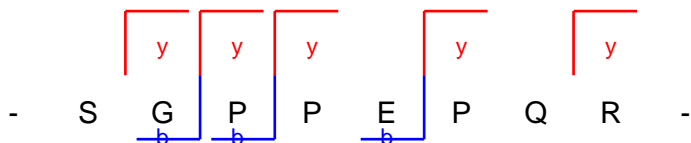

RO-QC-160121\_ZackD\_SS\_Set\_02\_Fraction 5122 FTMS; HCl 90.91 669.83 TMEM47

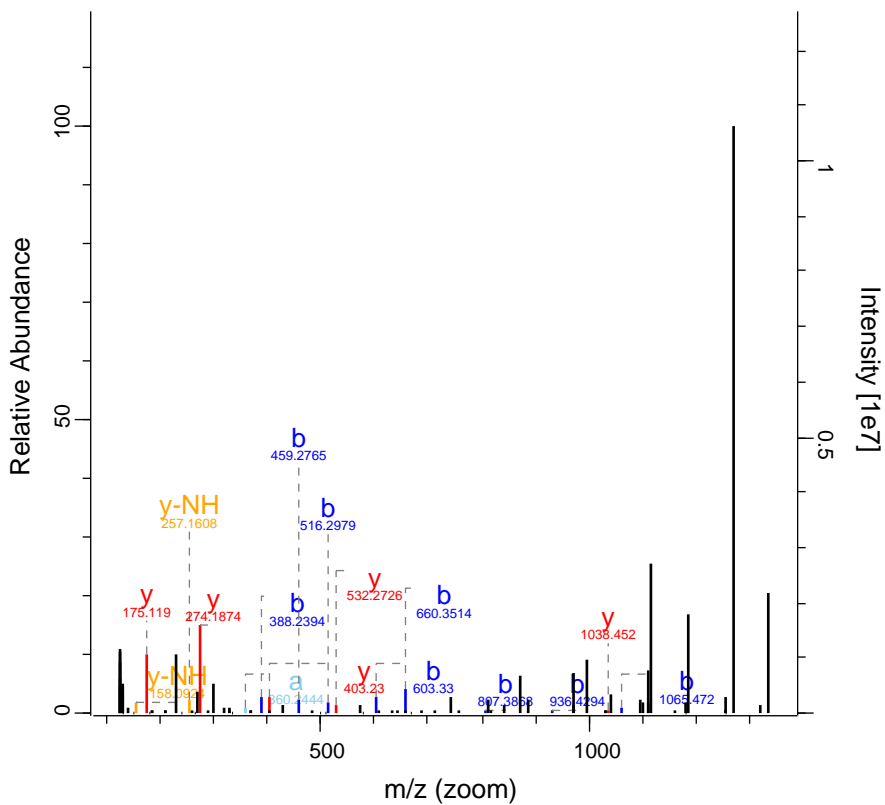



RO-QC-160121\_ZackD\_SS\_Set\_02\_Fraction15177 FTMS; HC 111.06 690.35 SLC2A12

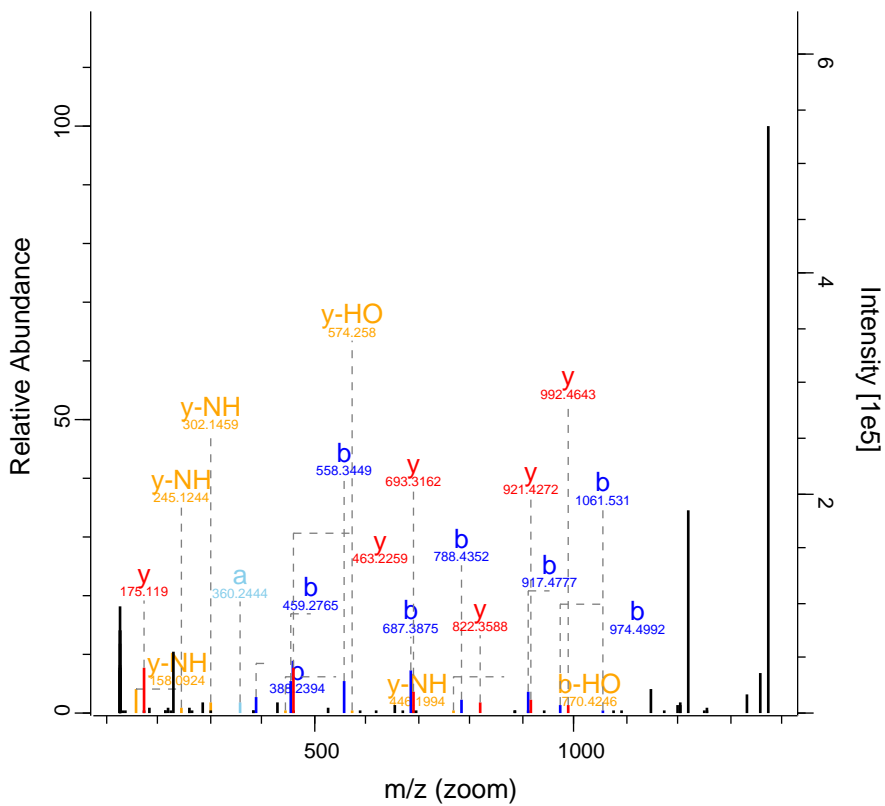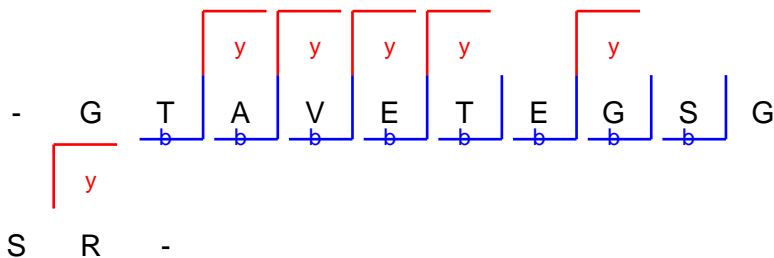

RO-QC-160121\_ZackD\_SS\_Set\_02\_Fraction 5190 FTMS; HC 122.33 656.82 KIF24

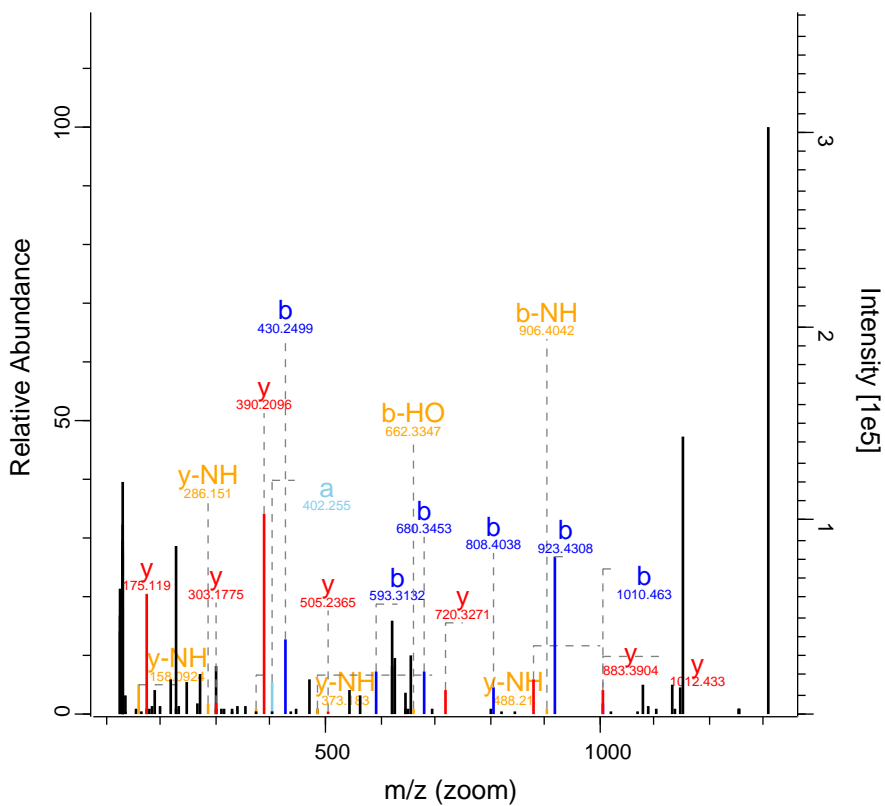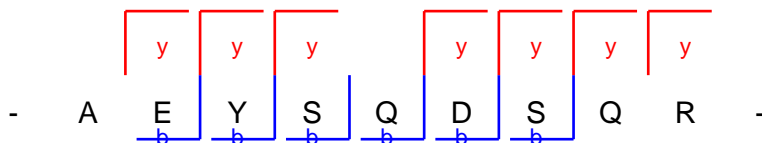

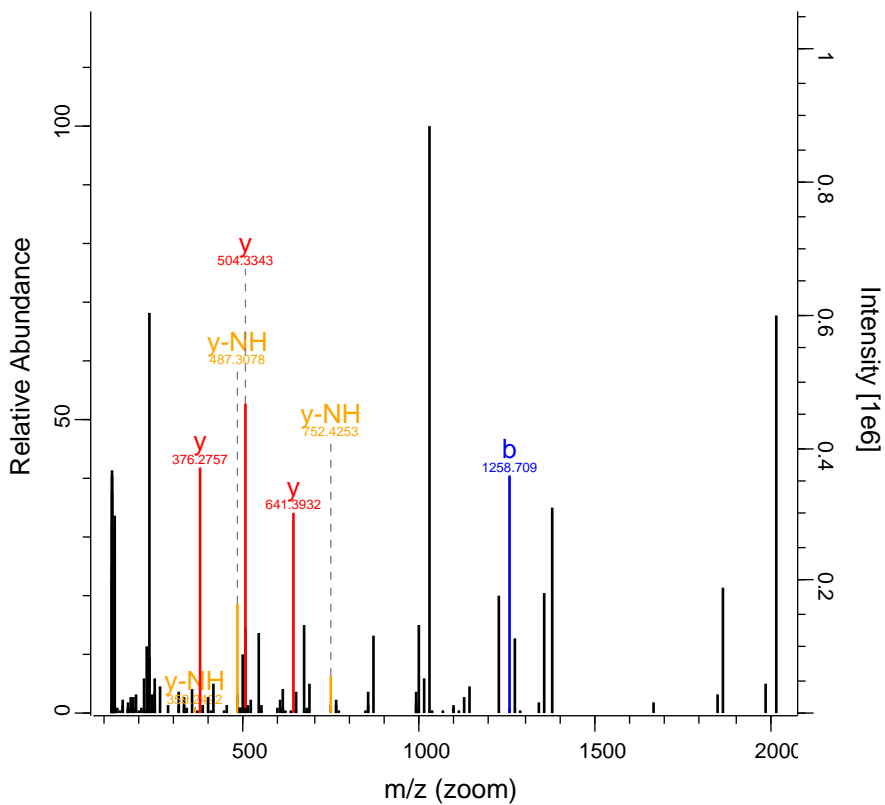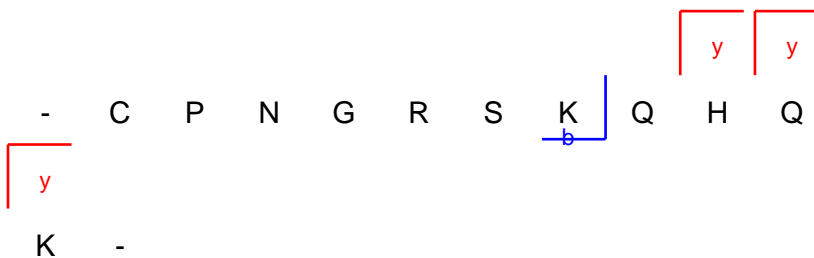

RO-QC-160121\_ZackD\_SS\_Set\_02\_Fraction 5279 FTMS; HC 125.83 598.82 MTF2

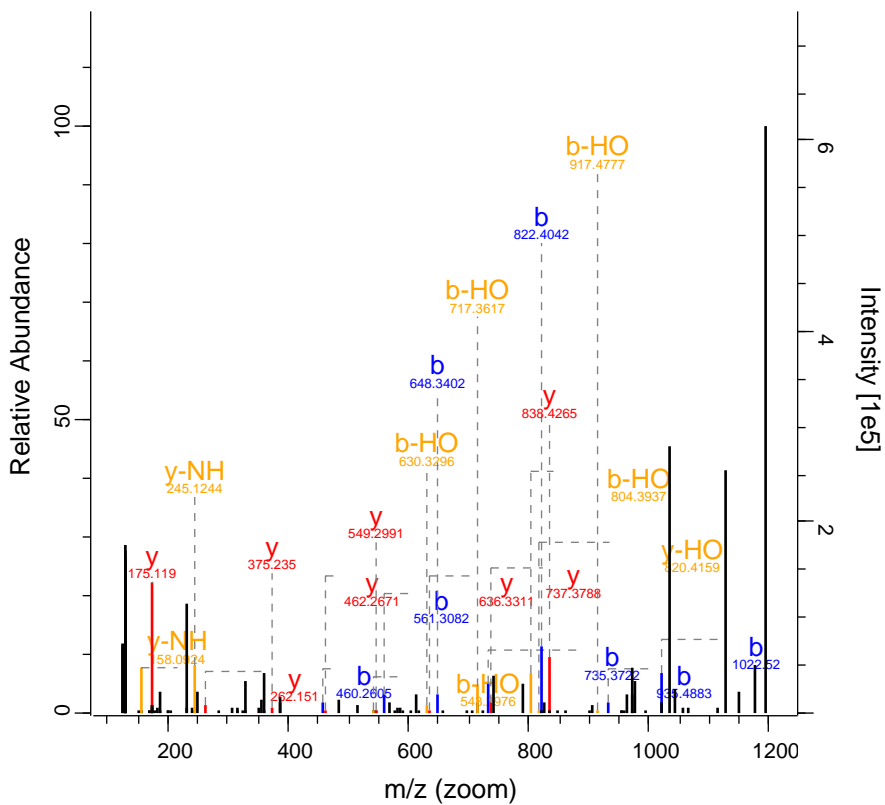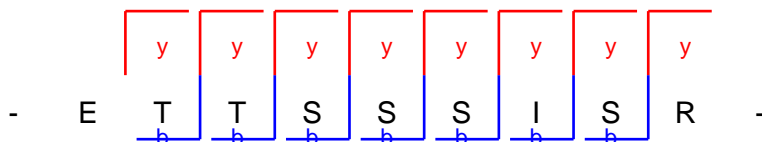

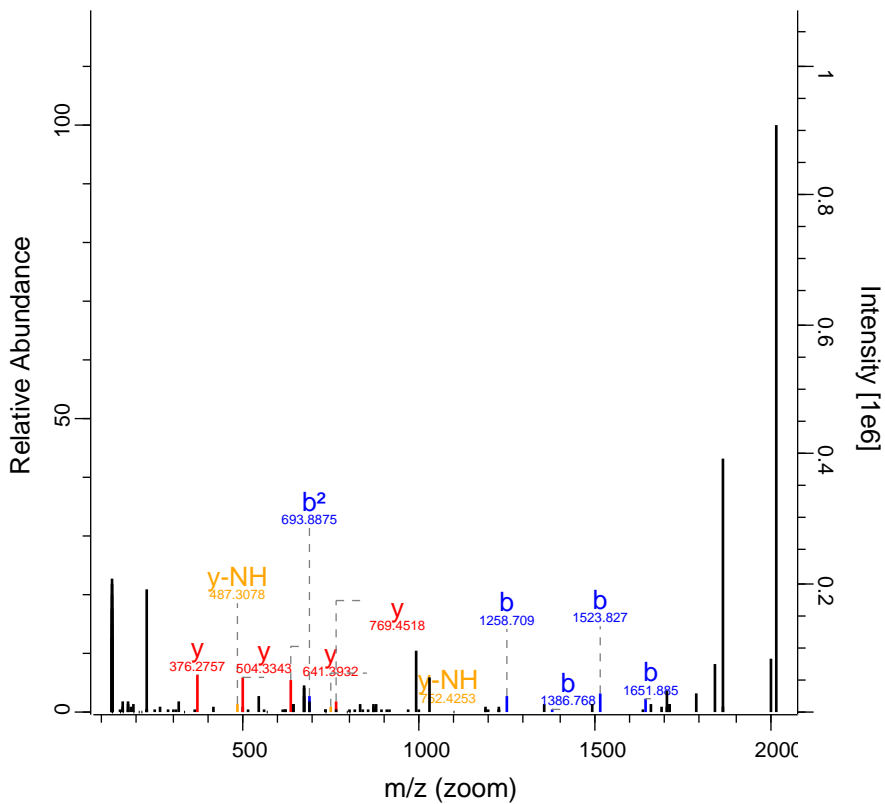

K -

RO-QC-160121\_ZackD\_SS\_Set\_02\_Fraction 5363 FTMS; HCl 86.34 755.85 RCN3

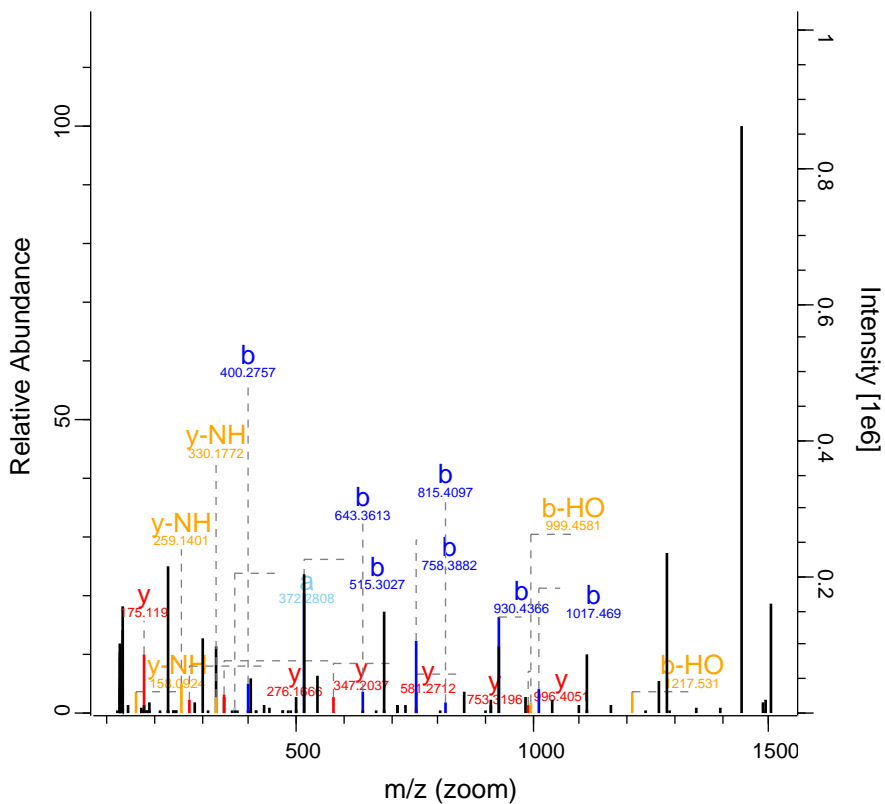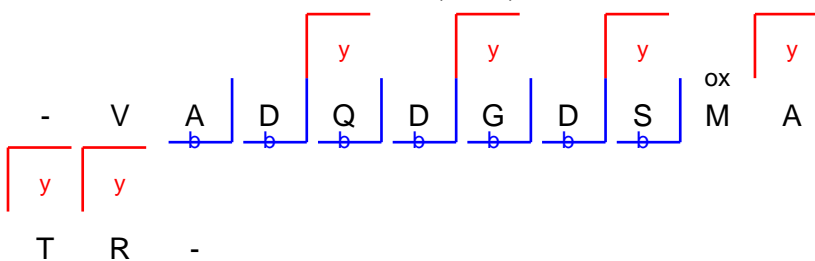



RO-QC-160121\_ZackD\_SS\_Set\_02\_Fraction 5592 FTMS; HC 204.79 649.86 CD99

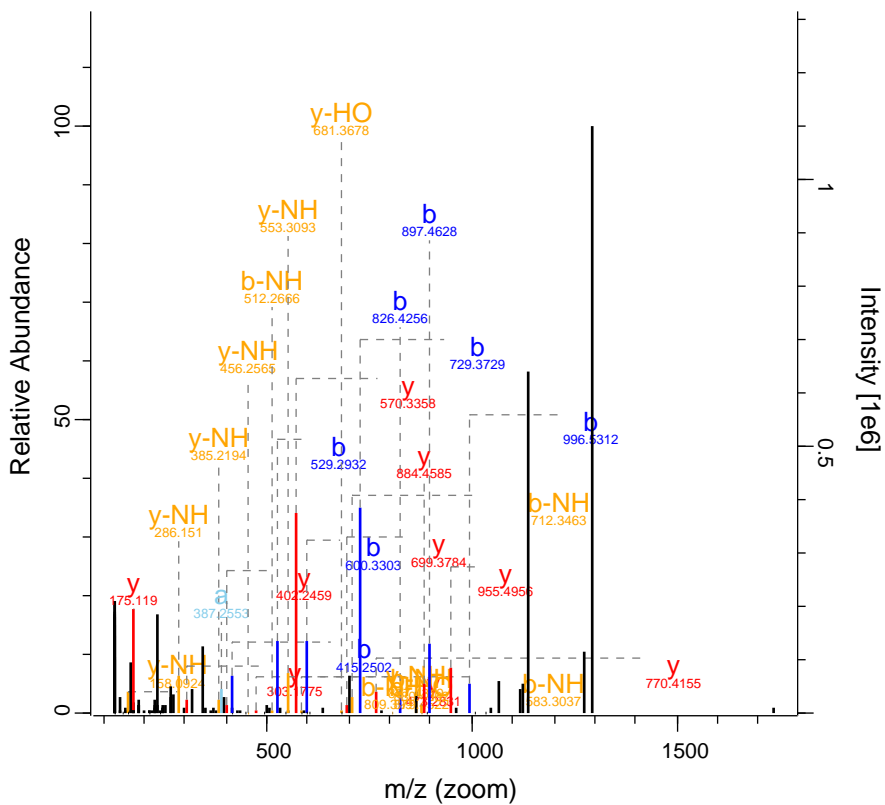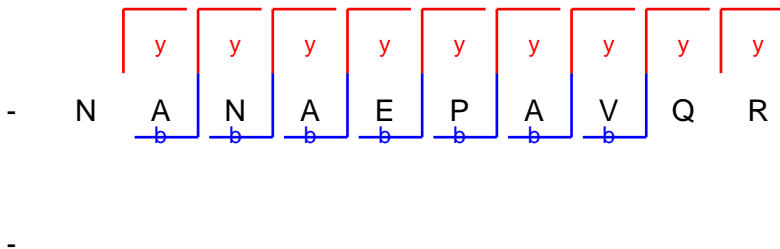



RO-QC-160121\_ZackD\_SS\_Set\_02\_Fraction 5621 FTMS; HCl 76.94 433.57 CD99

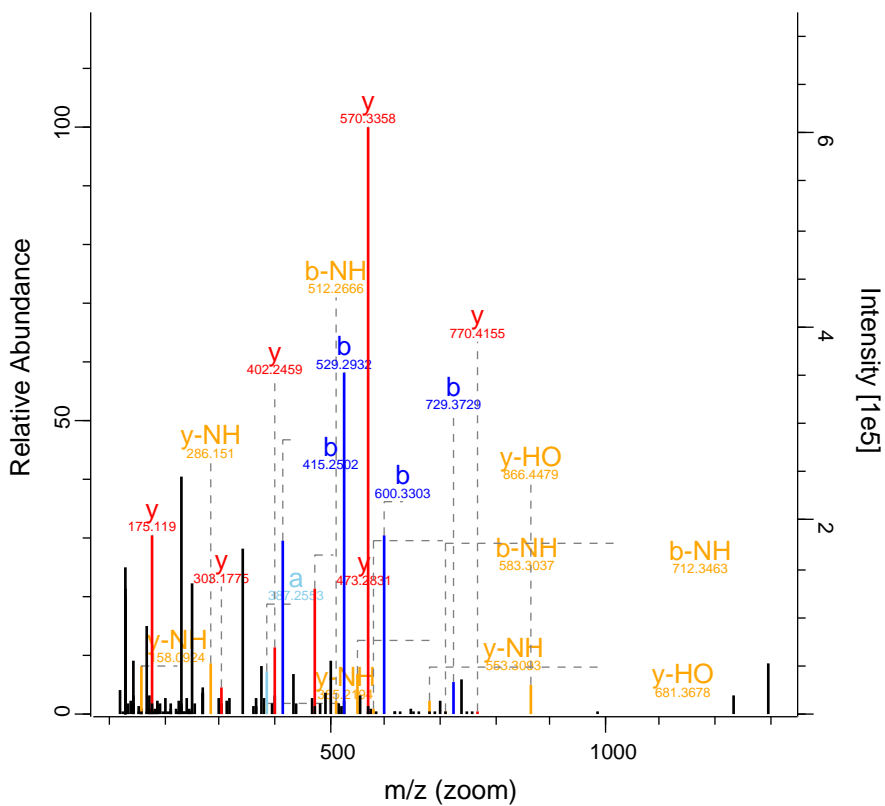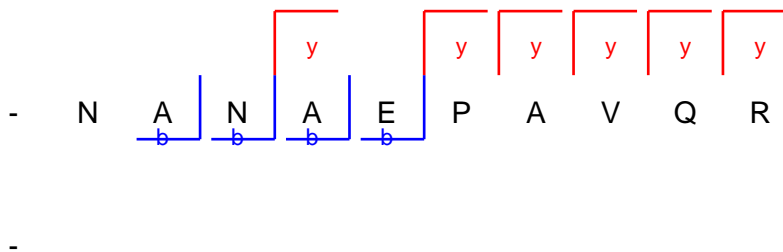

RO-QC-160121\_ZackD\_SS\_Set\_02\_Fraction 5713 FTMS; HCl 56.92 713.39 LARP6

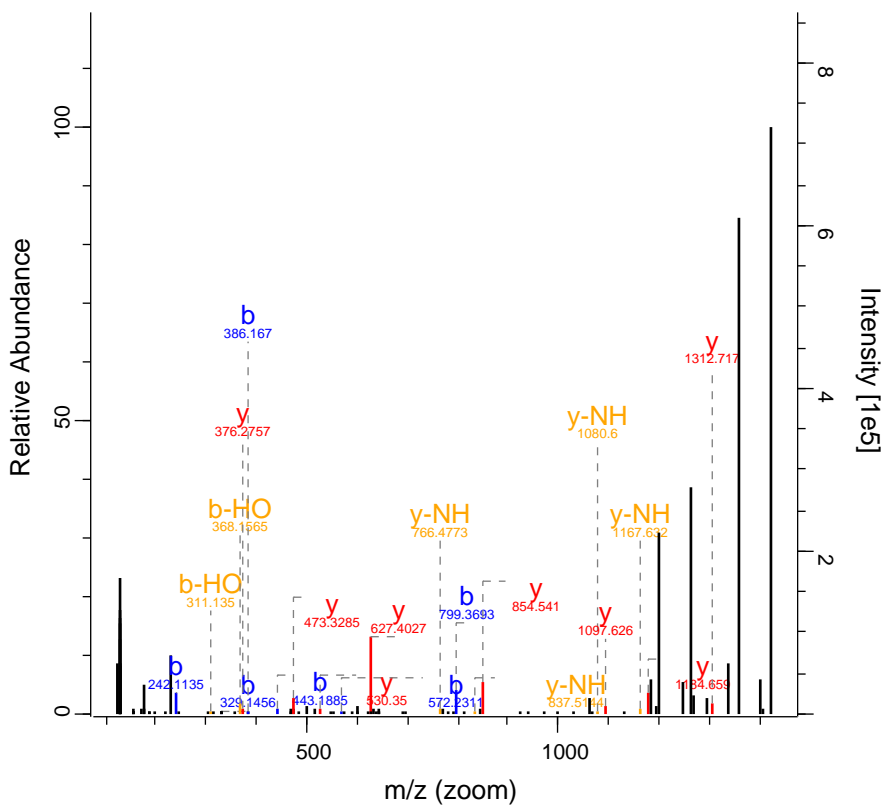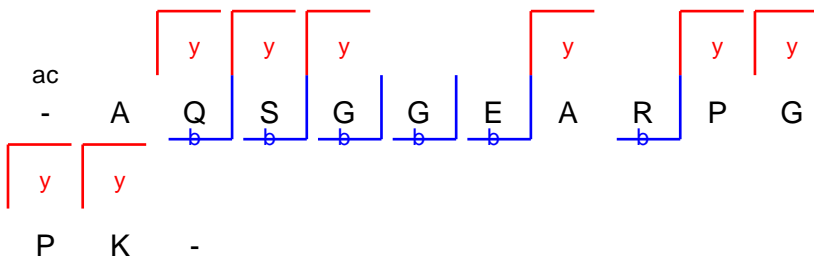

RO-QC-160121\_ZackD\_SS\_Set\_02\_Fraction 5819 FTMS; HC 129.42 681.78 VOPP1

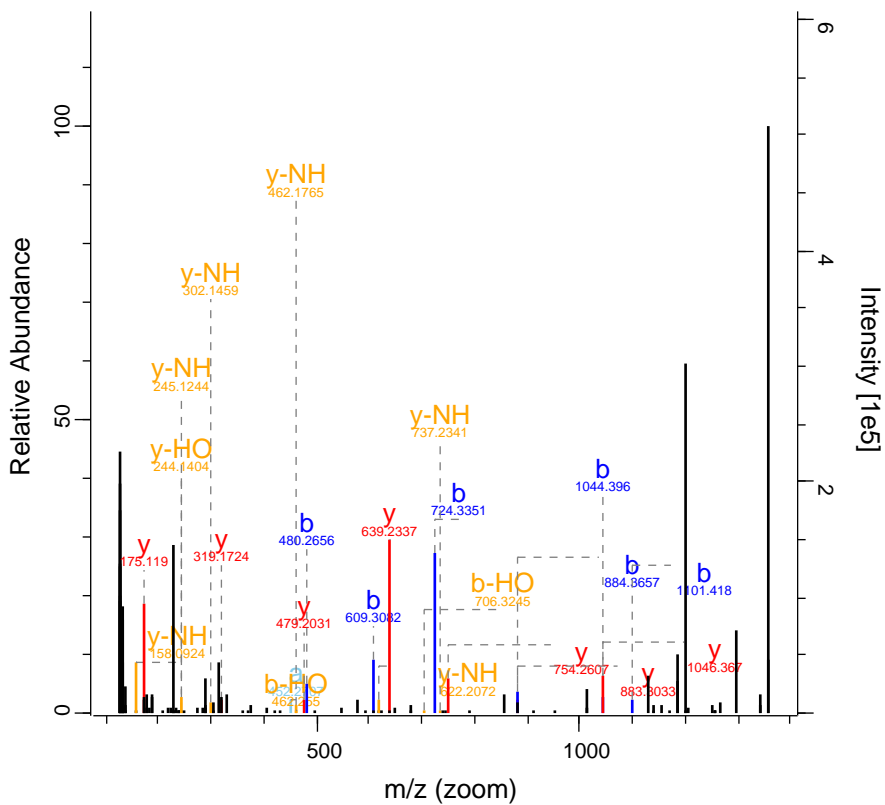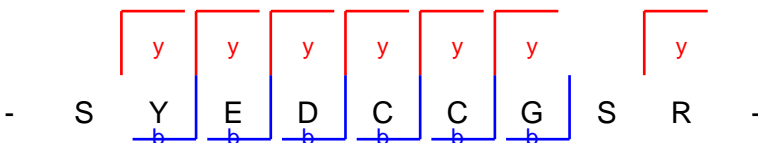

RO-QC-160121\_ZackD\_SS\_Set\_02\_Fraction 5869 FTMS; HC 130.28 547.29 PI4K2B

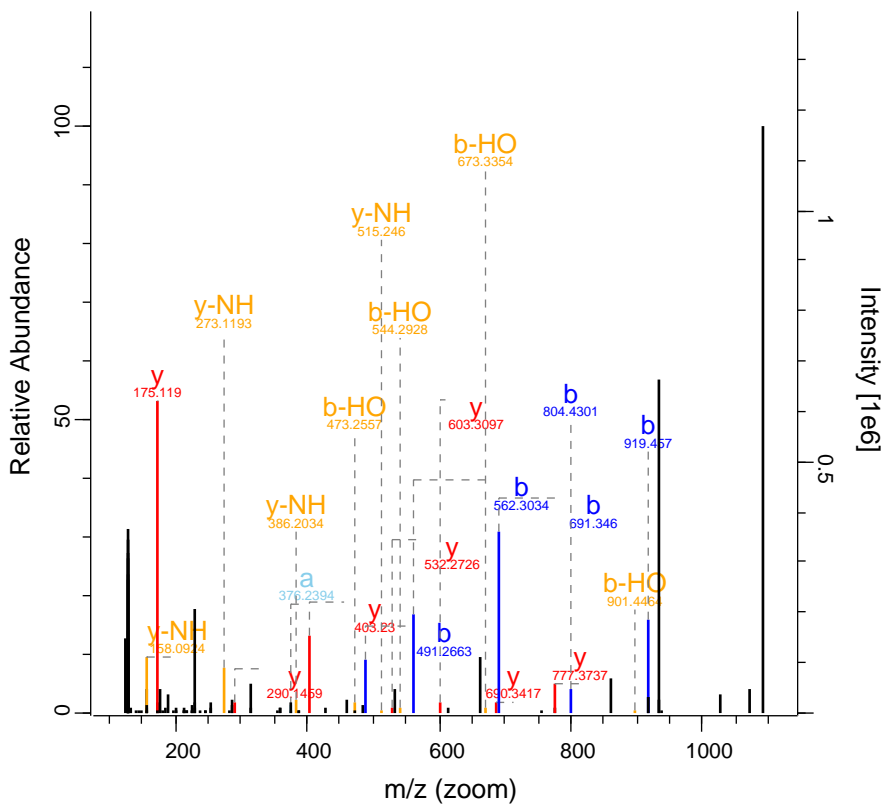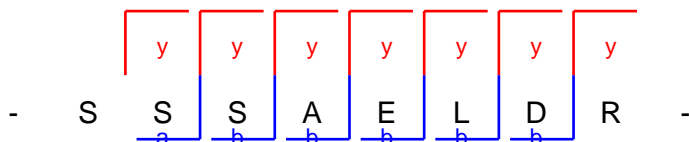

RO-QC-160121\_ZackD\_SS\_Set\_02\_Fraction 5977 FTMS; HC 125.47 681.79 VOPP1

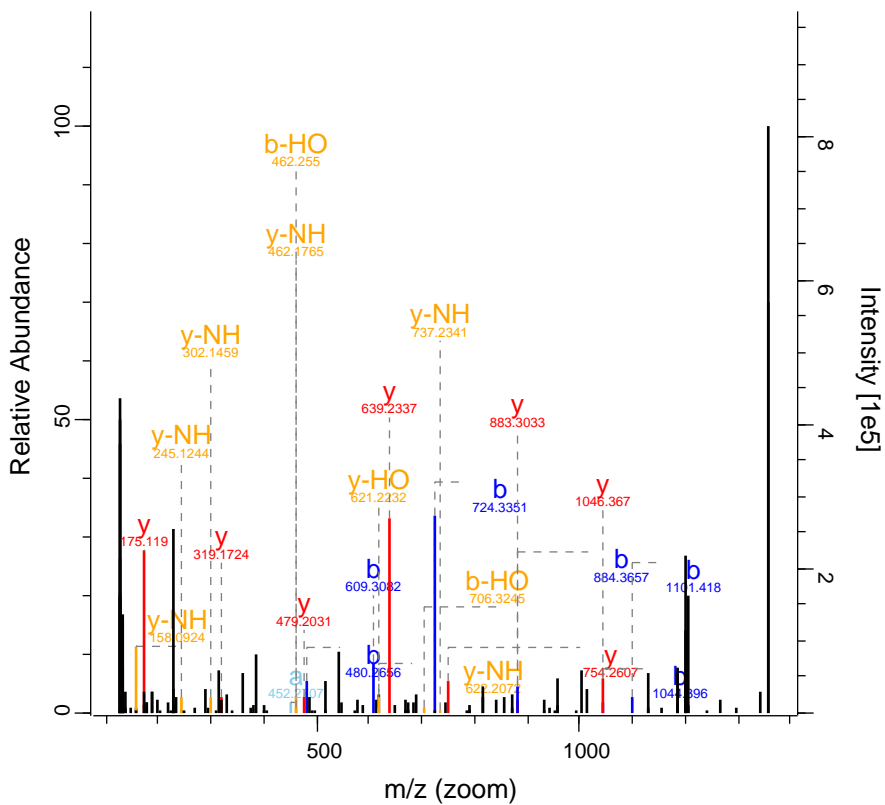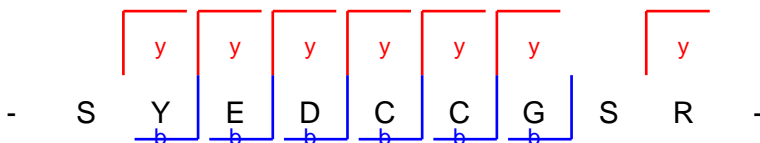



RO-QC-160121\_ZackD\_SS\_Set\_02\_Fraction 6388 FTMS; HCl 86.94 520.59 ZNF511

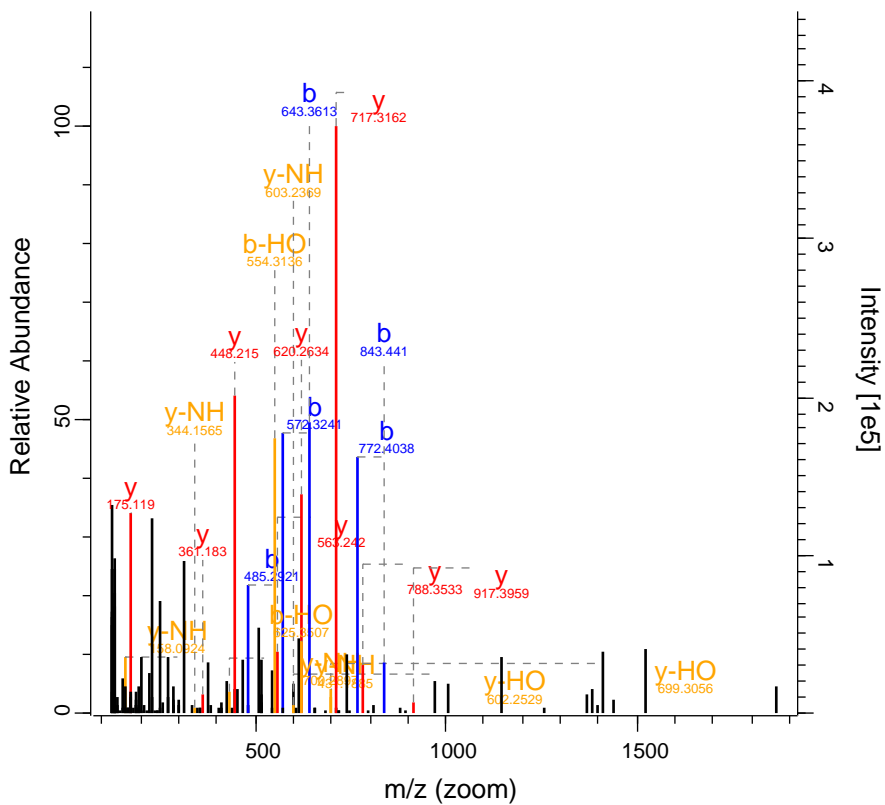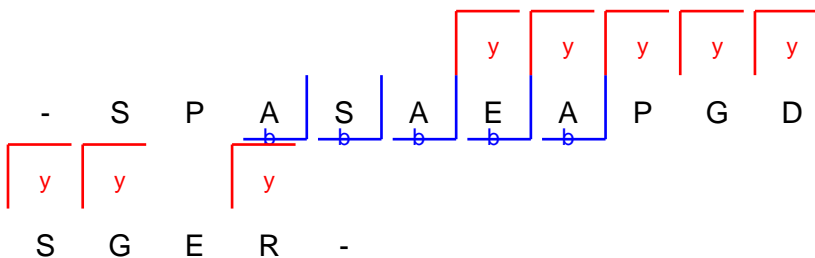

RO-QC-160121\_ZackD\_SS\_Set\_02\_Fraction 6568 FTMS; HC 113.93 798.88 PROSER1

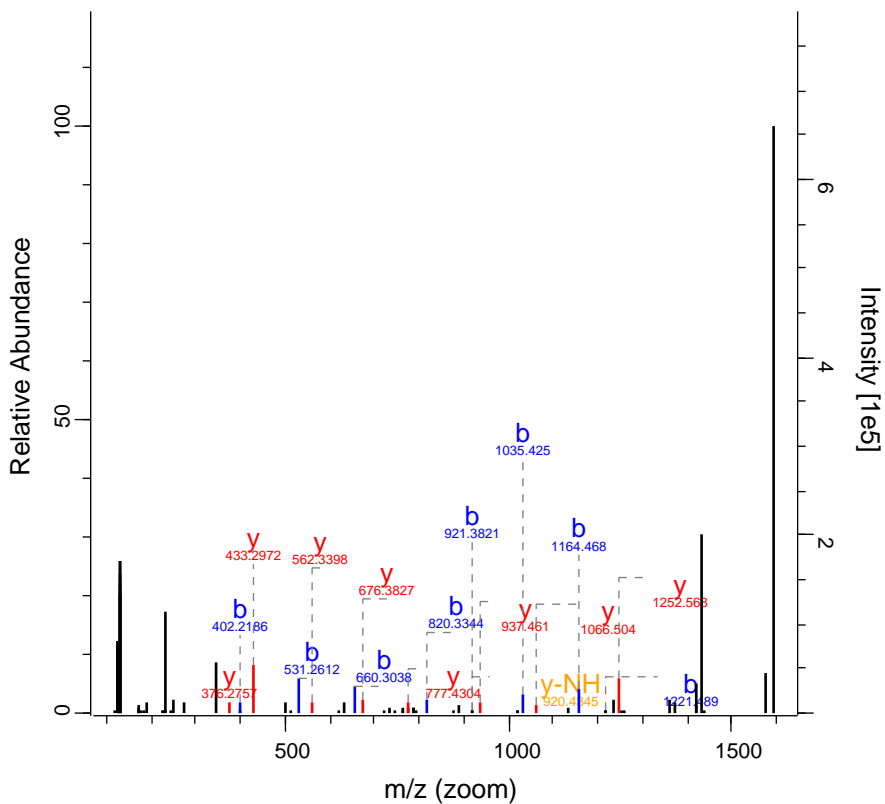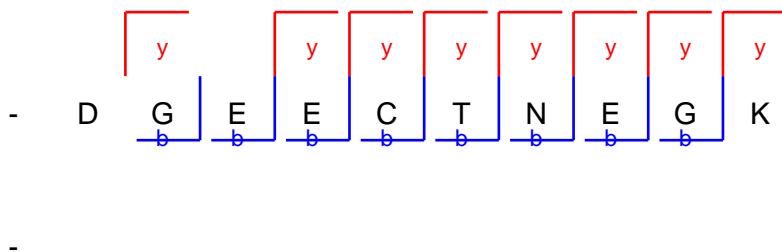



RO-QC-160121\_ZackD\_SS\_Set\_02\_Fraction 7238 FTMS; HC 124.23 743.86 CCBE1

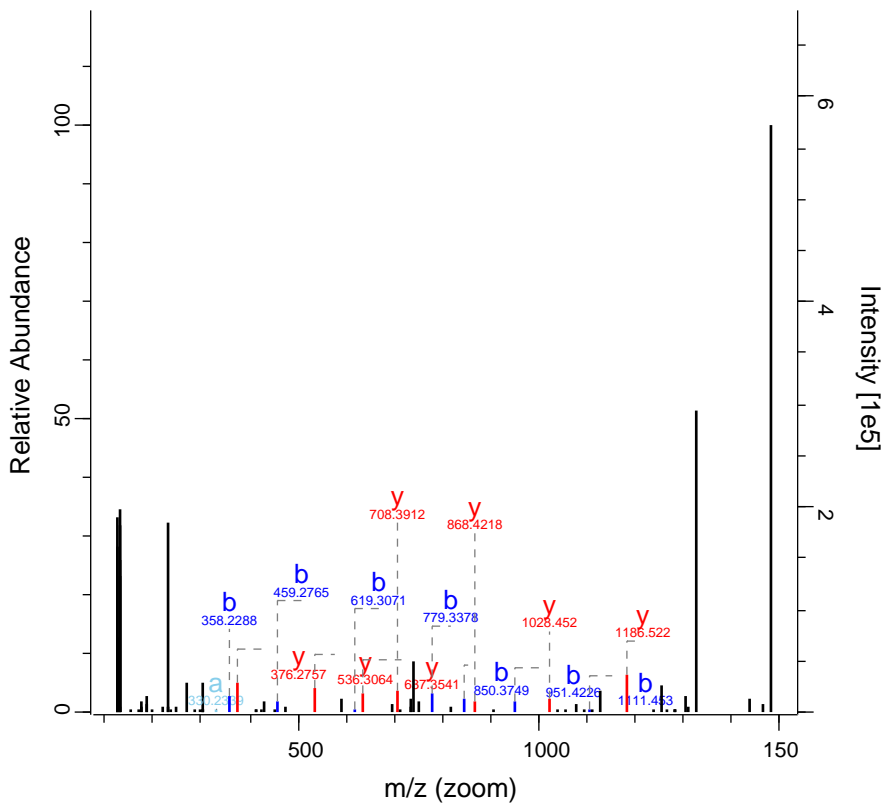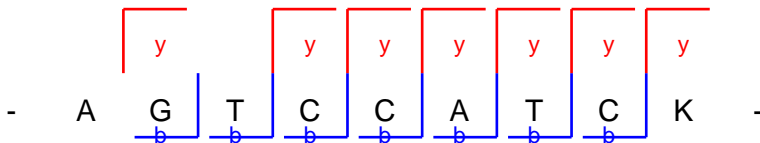

RO-QC-160121\_ZackD\_SS\_Set\_02\_Fraction7 7321 FTMS; HC 113.63 395.23 SHKBP1

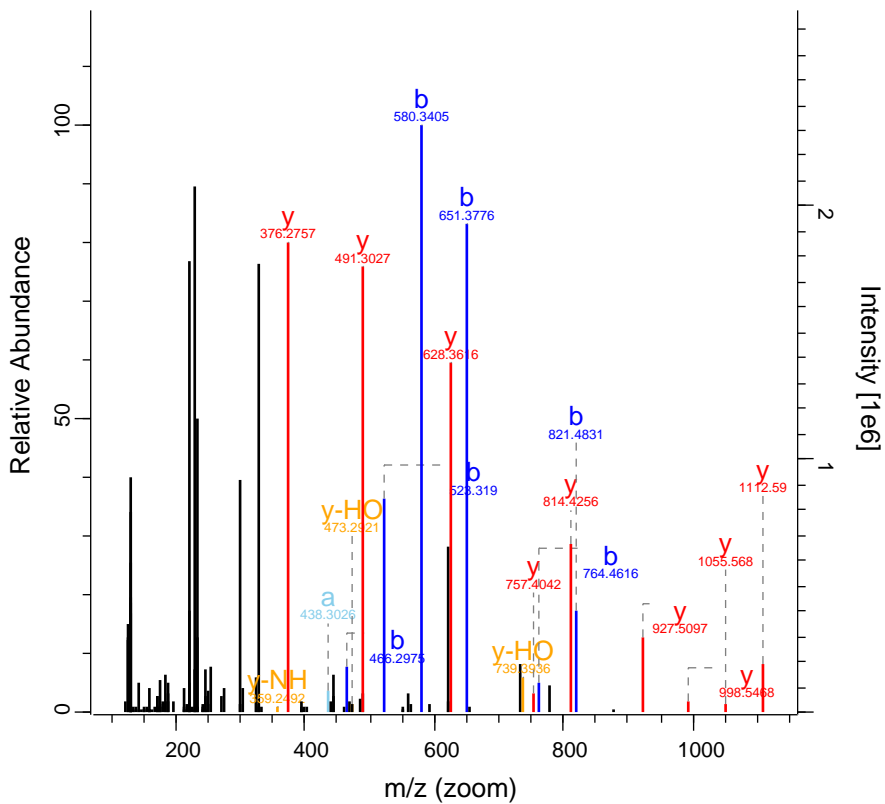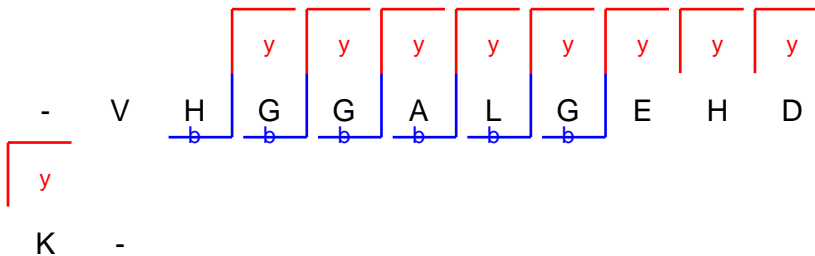

RO-QC-160121\_ZackD\_SS\_Set\_02\_Fraction 7820 FTMS; HC 162.36 772.92 FAM102B

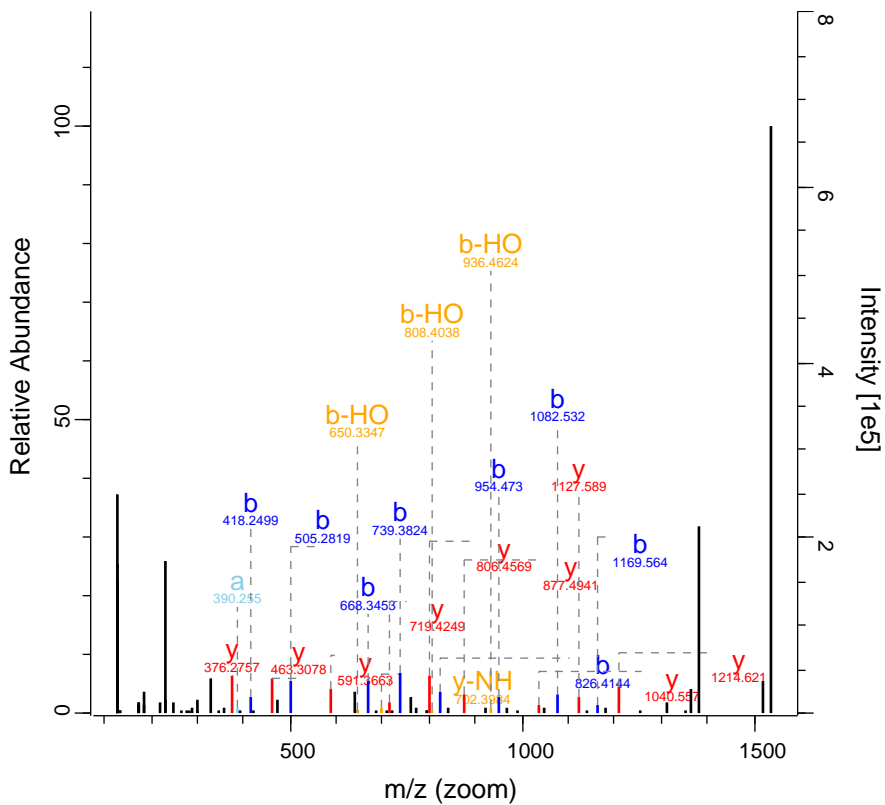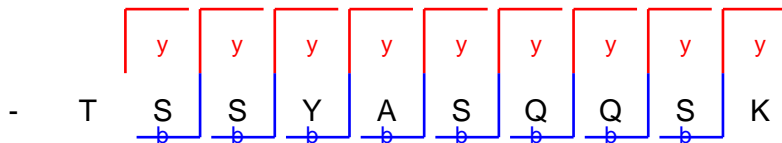

RO-QC-160121\_ZackD\_SS\_Set\_02\_Fraction 7968 FTMS; HC 108.47 691.37 SH2B2

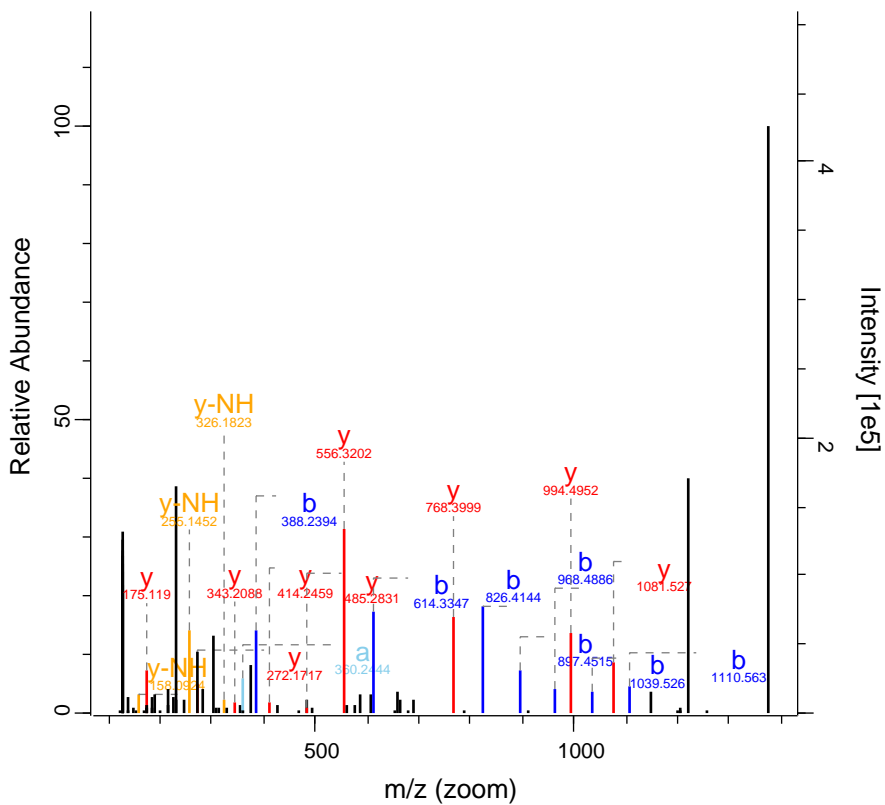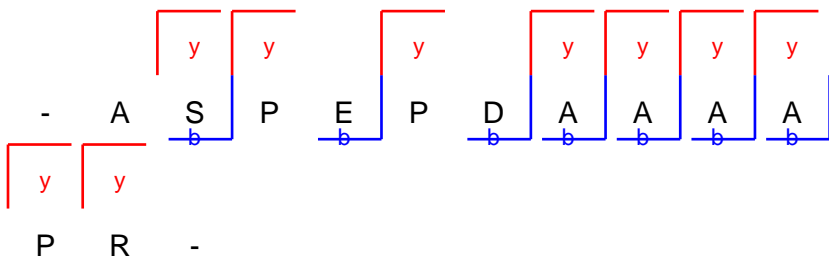

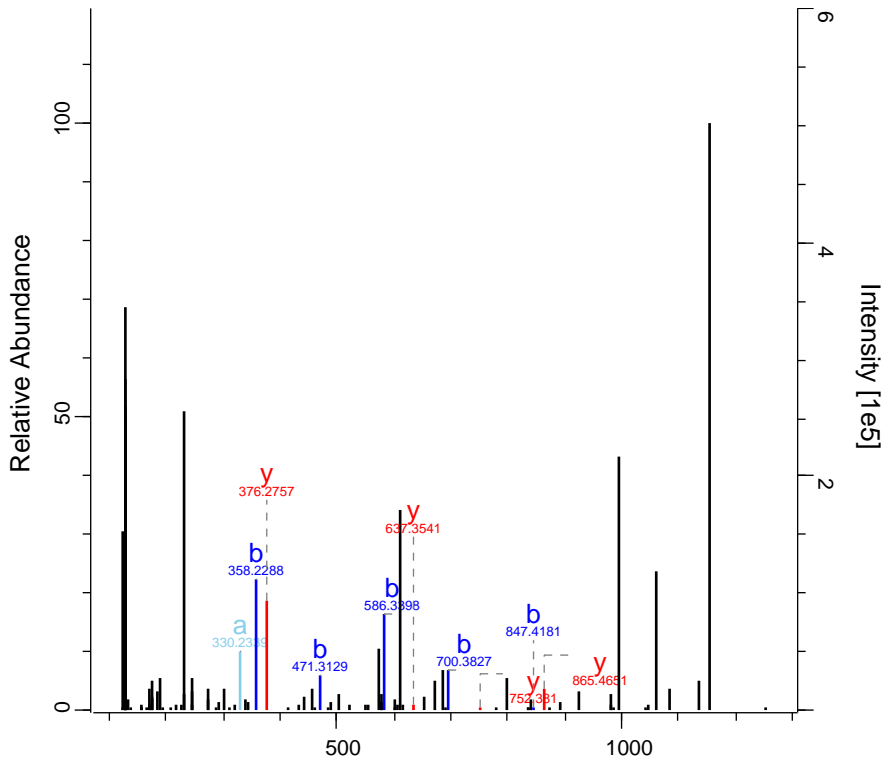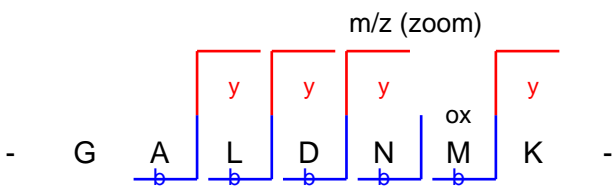

RO-QC-160121\_ZackD\_SS\_Set\_02\_Fraction 8150 FTMS; HCl 133.98 781.9 SPICE1

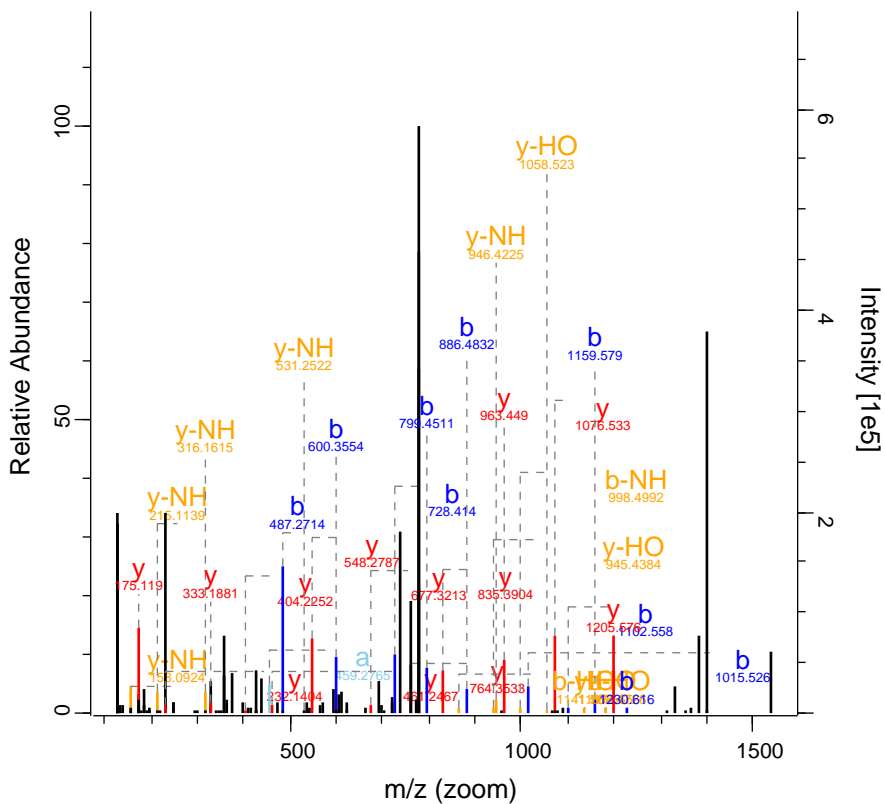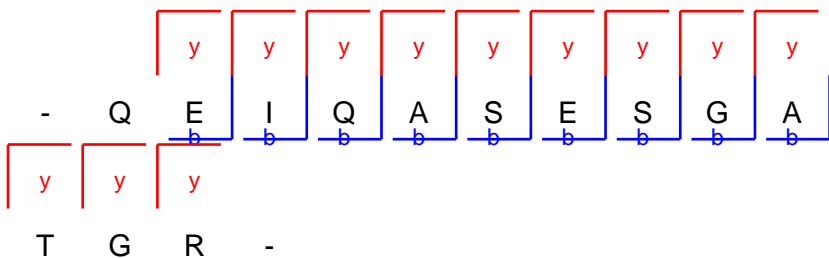

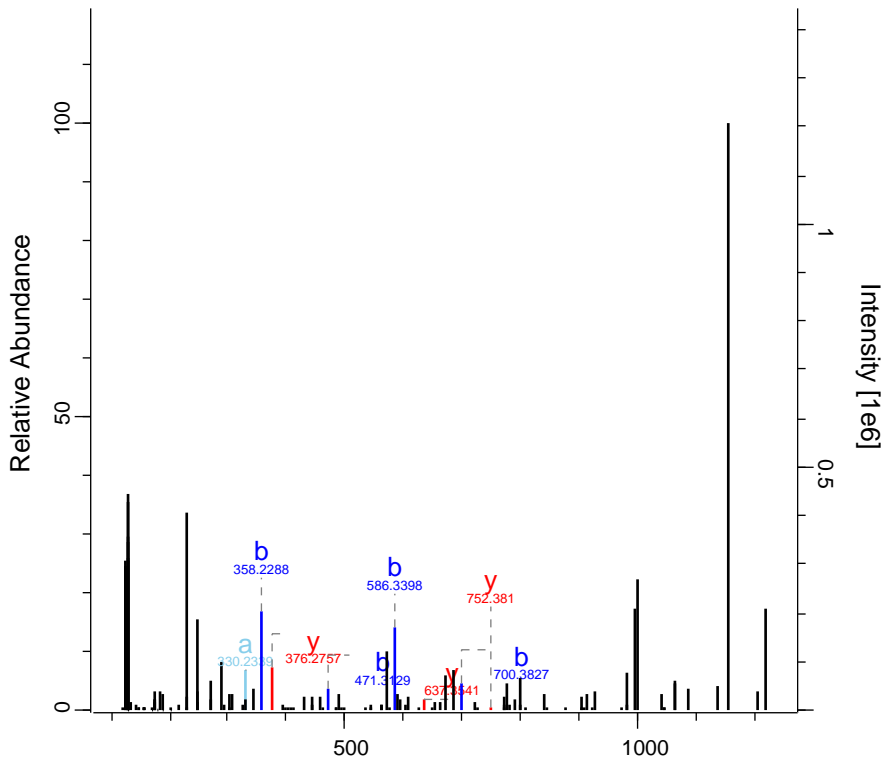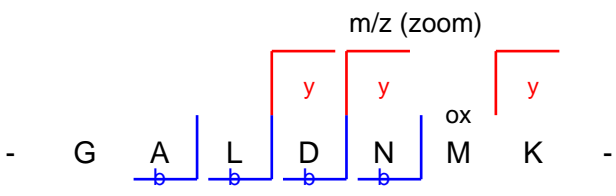

RO-QC-160121\_ZackD\_SS\_Set\_02\_Fraction 8331 FTMS; HC 102.51 610.87 ICE2

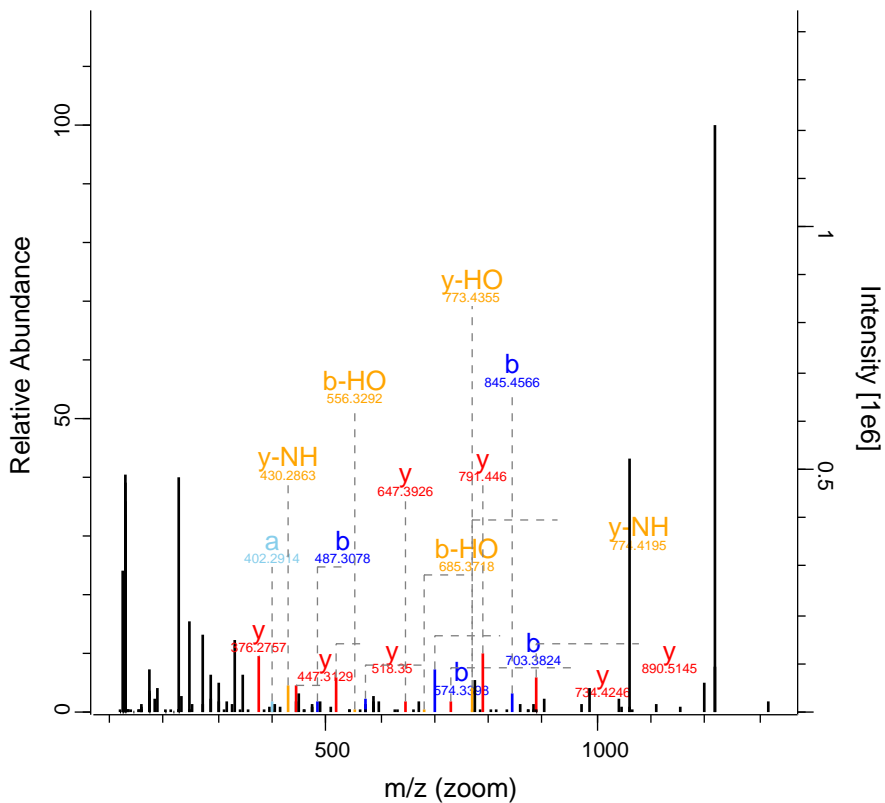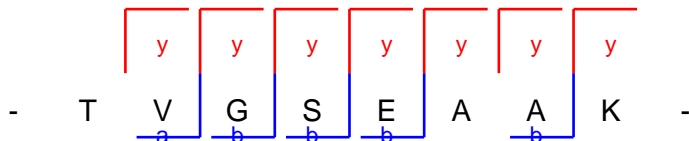



RO-QC-160121\_ZackD\_SS\_Set\_02\_Fraction 8707 FTMS; HCl 95.5 482.29 C2orf44

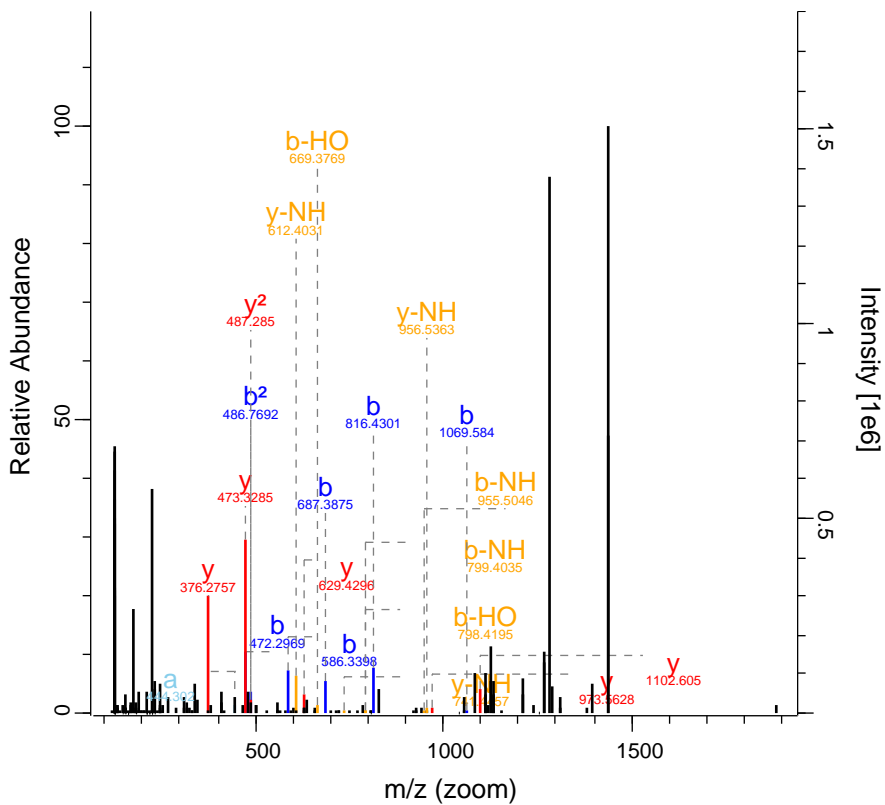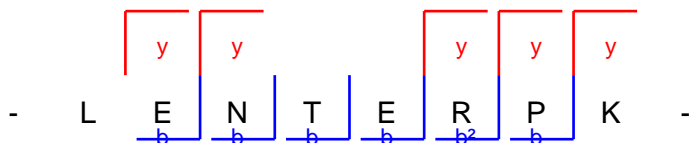

RO-QC-160121\_ZackD\_SS\_Set\_02\_Fraction 8792 FTMS; HC 120.86 730.37 WTIP

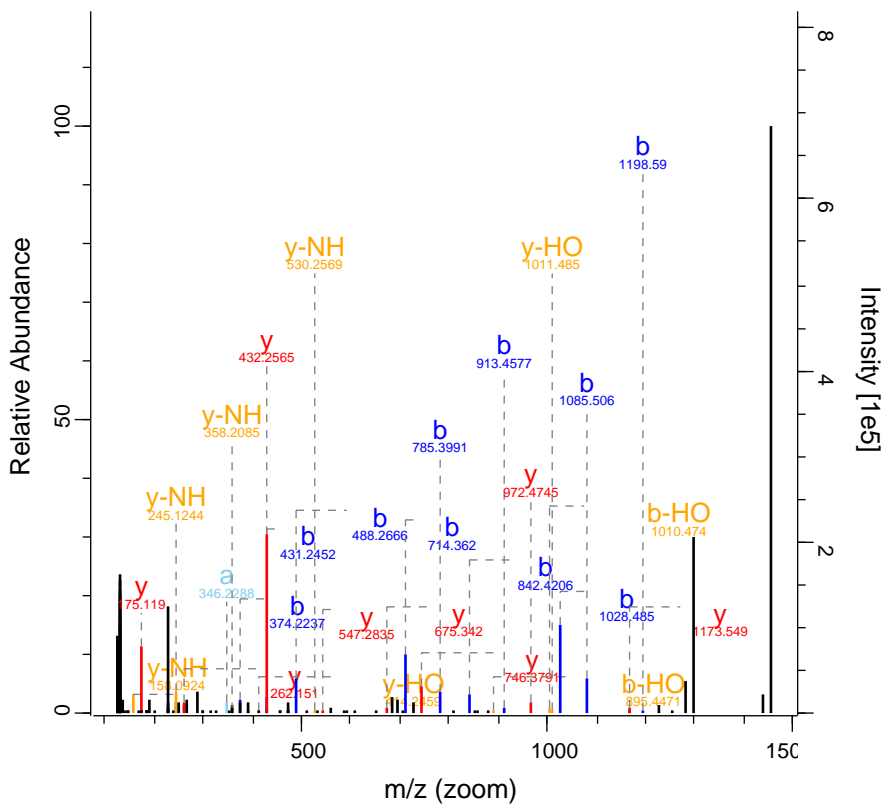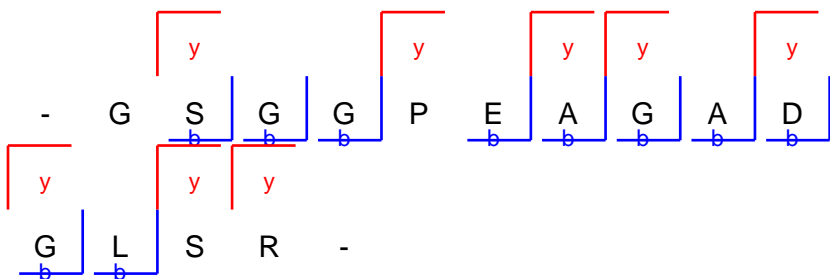

RO-QC-160121\_ZackD\_SS\_Set\_02\_Fraction 9119 FTMS; HC 130.75 623.33 TFPT

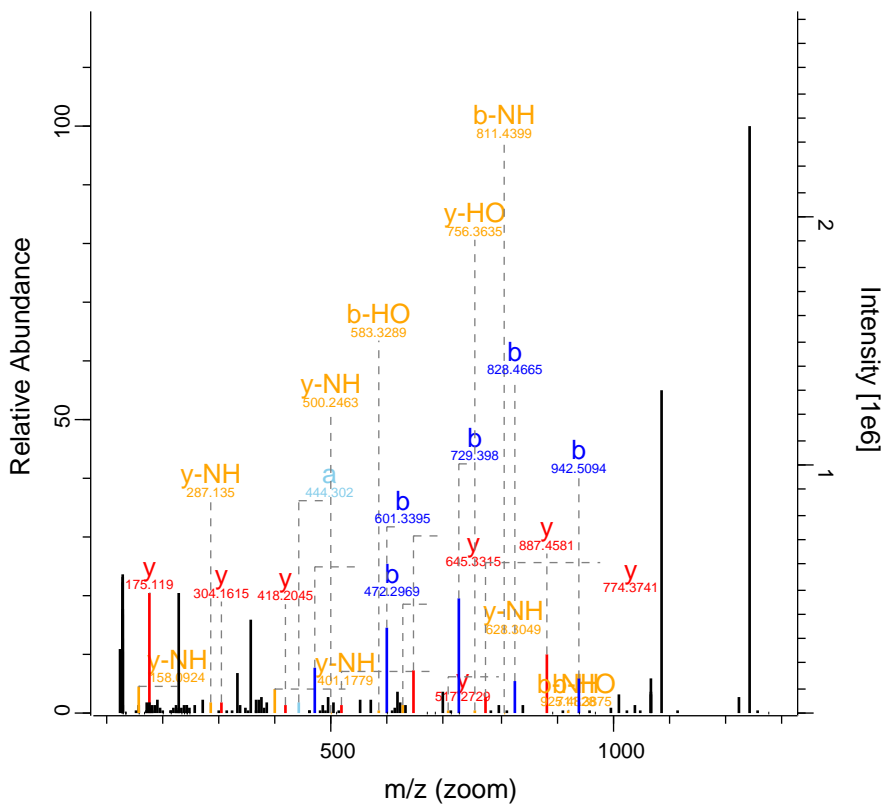

m/z (zoom)

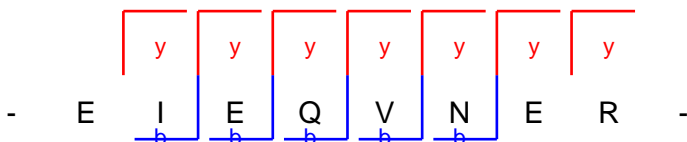





RO-QC-160121\_ZackD\_SS\_Set\_02\_Fraction 9524 FTMS; HCl 43.08 841.9 GLRX2

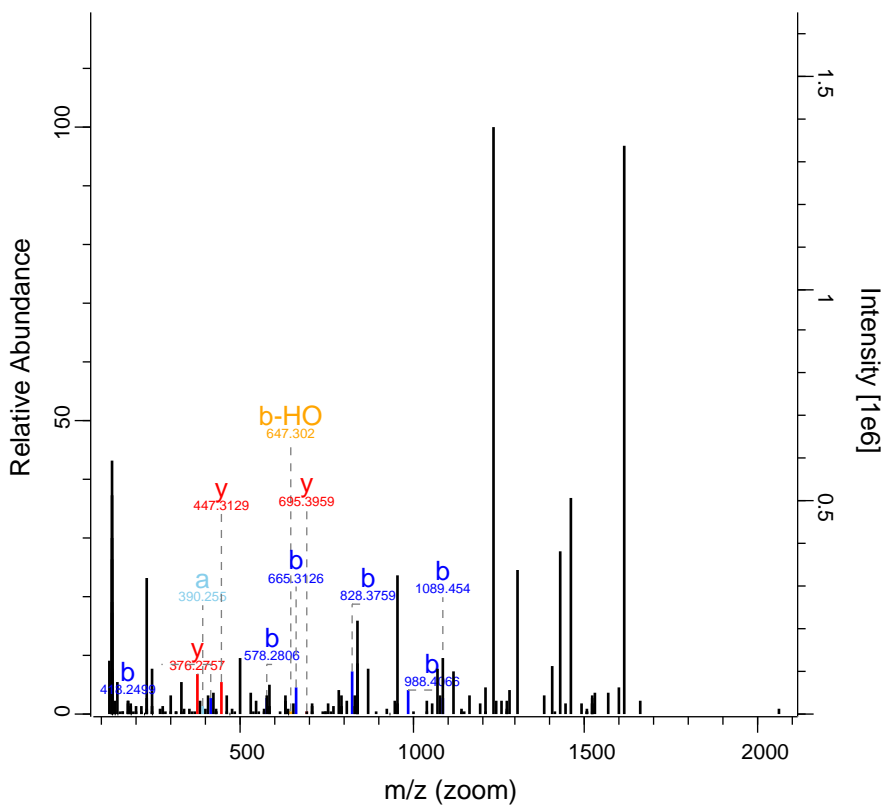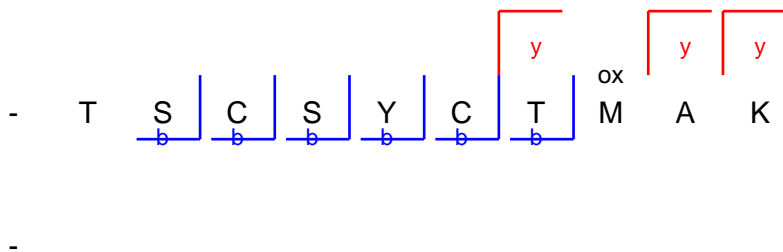

RO-QC-160121\_ZackD\_SS\_Set\_02\_Fraction\_2

9572 FTMS; HCD 62.71 373.9

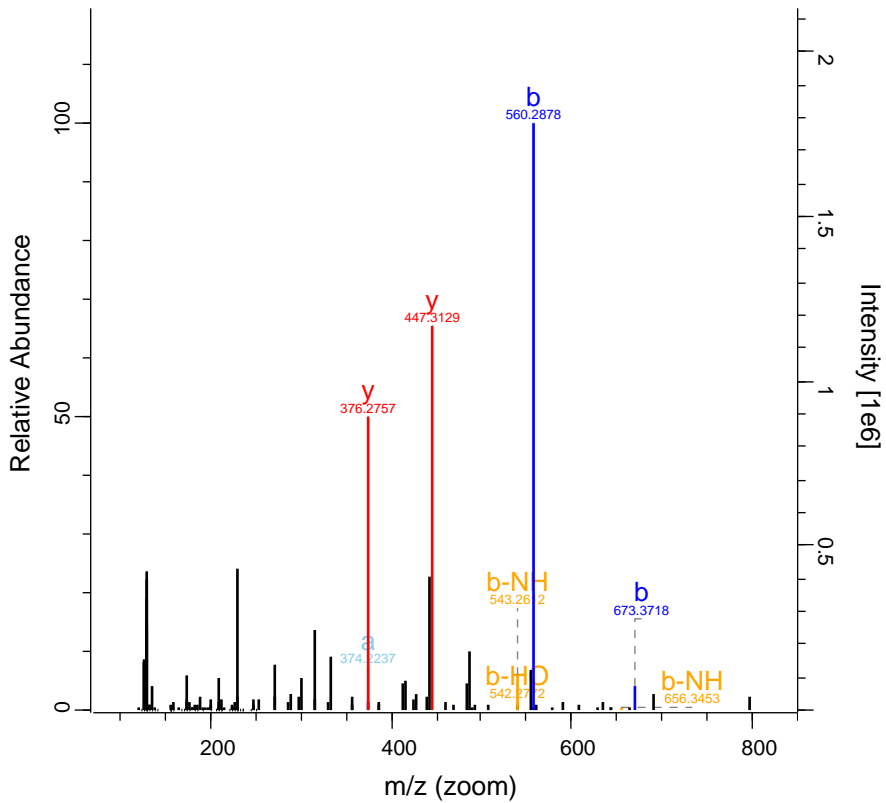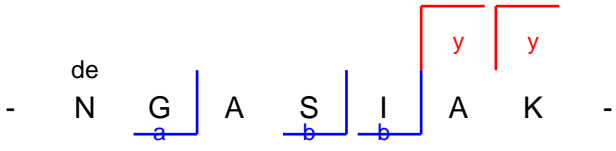

RO-QC-160121\_ZackD\_SS\_Set\_02\_Fraction 9635 FTMS; HCl 87.08 571.31 SMIM7

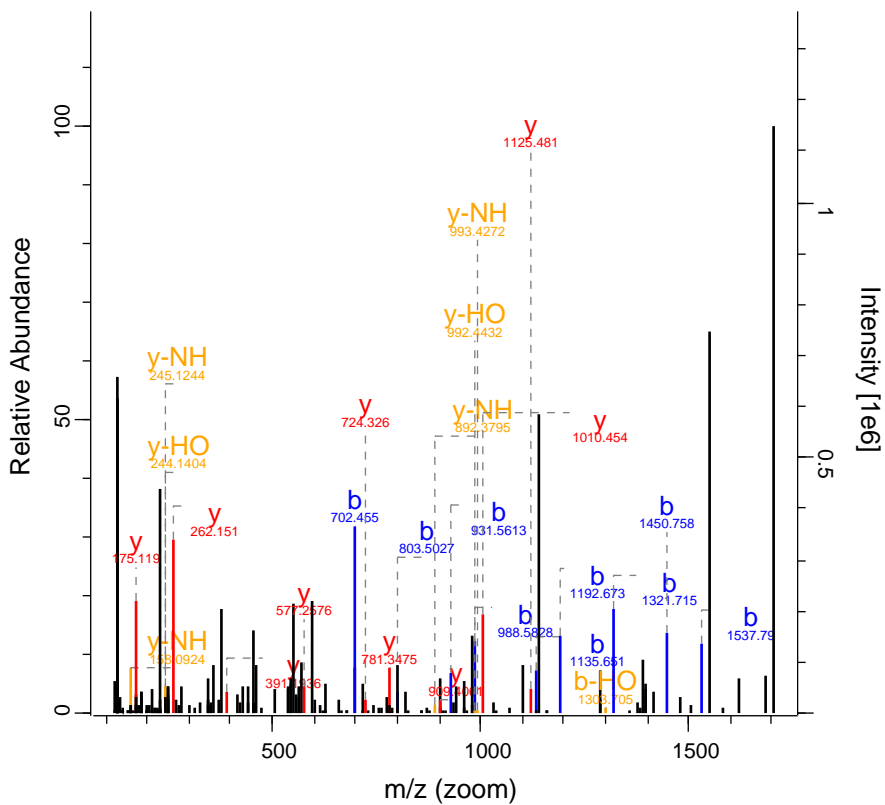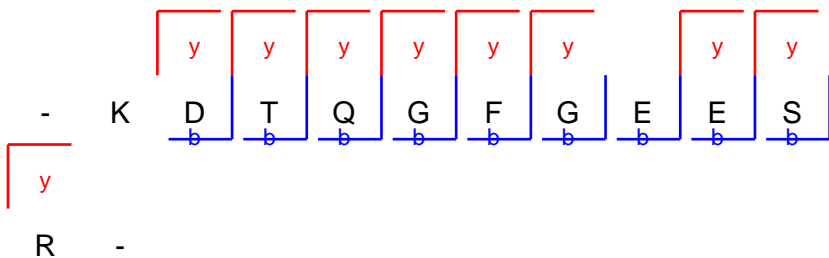

R -







RO-QC-160121\_ZackD\_SS\_Set\_02\_Fraction 10440 FTMS; HC 50.28 906.92 CC2D2B

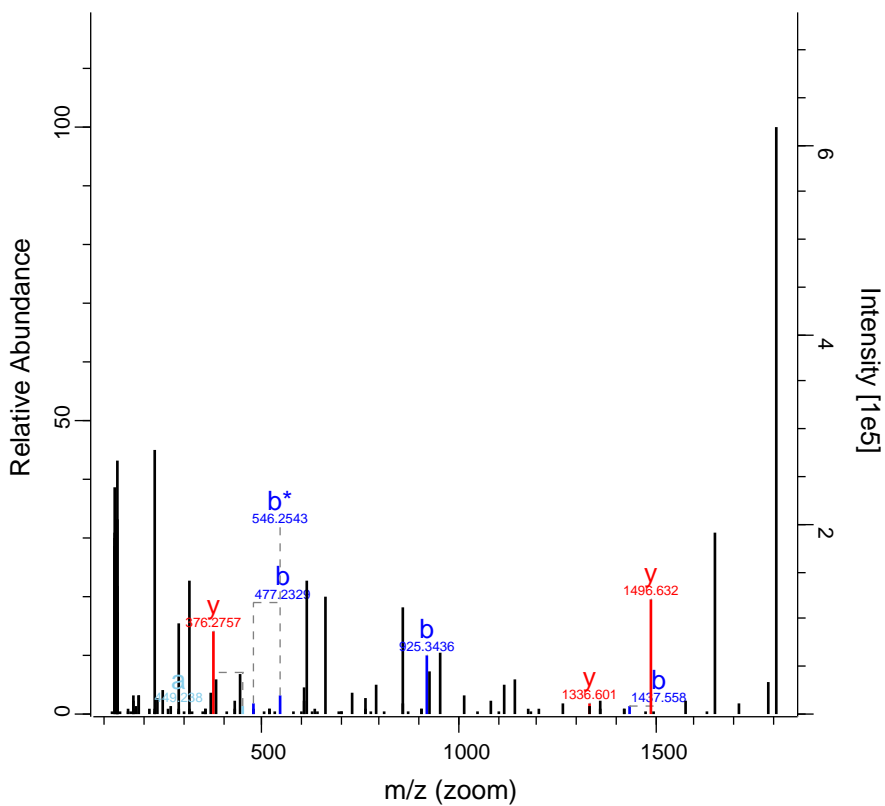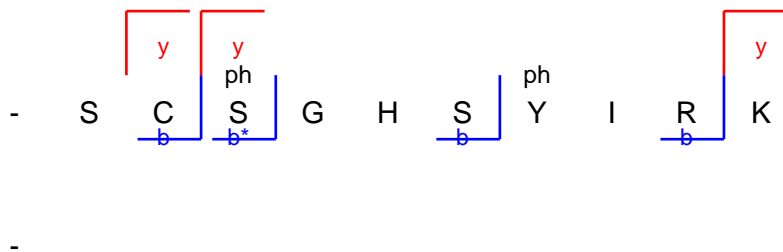

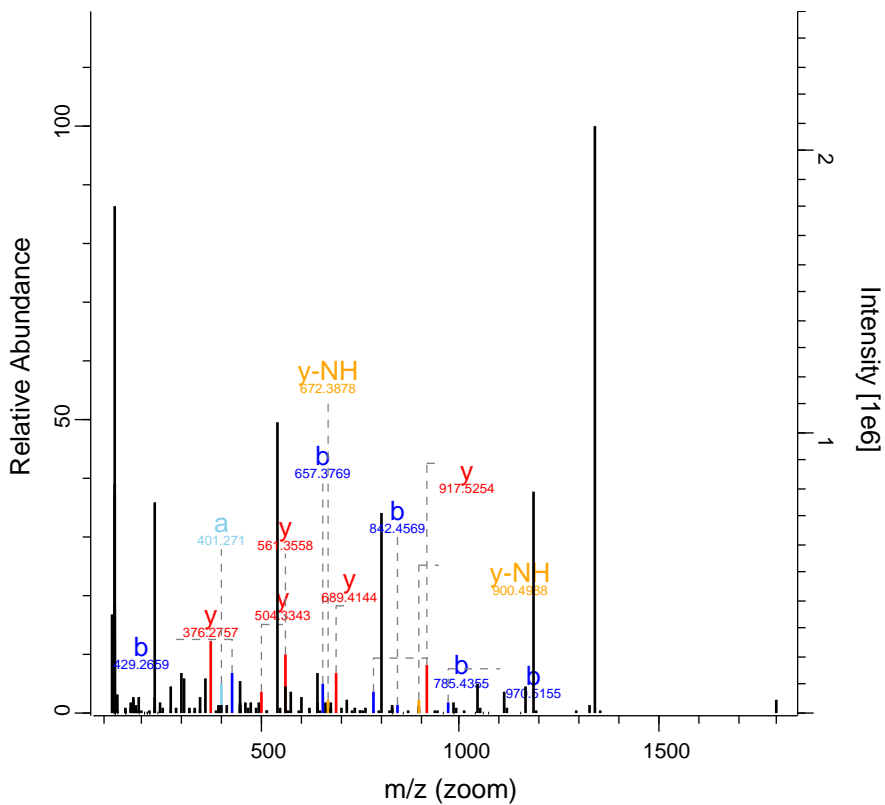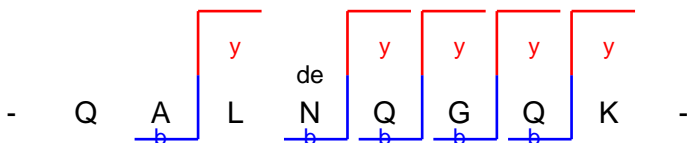

RO-QC-160121\_ZackD\_SS\_Set\_02\_Fraction 10627 FTMS; HC 40.59 646.31 ATF7IP2

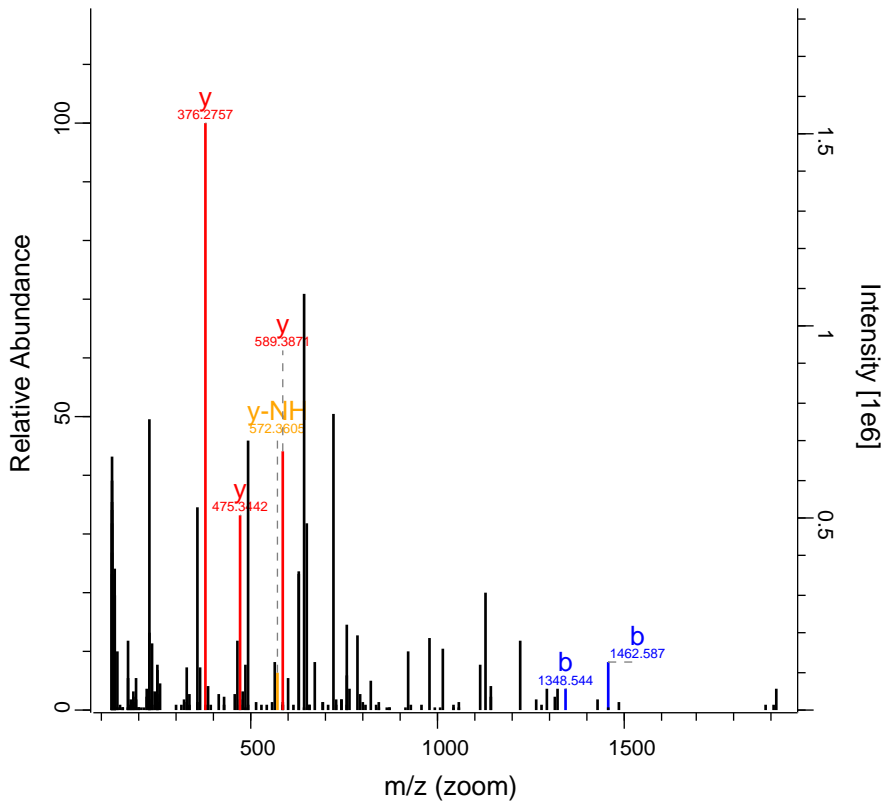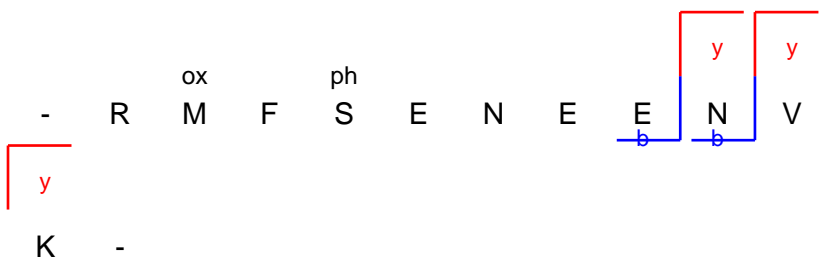

K -

RO-QC-160121\_ZackD\_SS\_Set\_02\_Fraction 10827 FTMS; HC 66.43 464.61 KCNV2

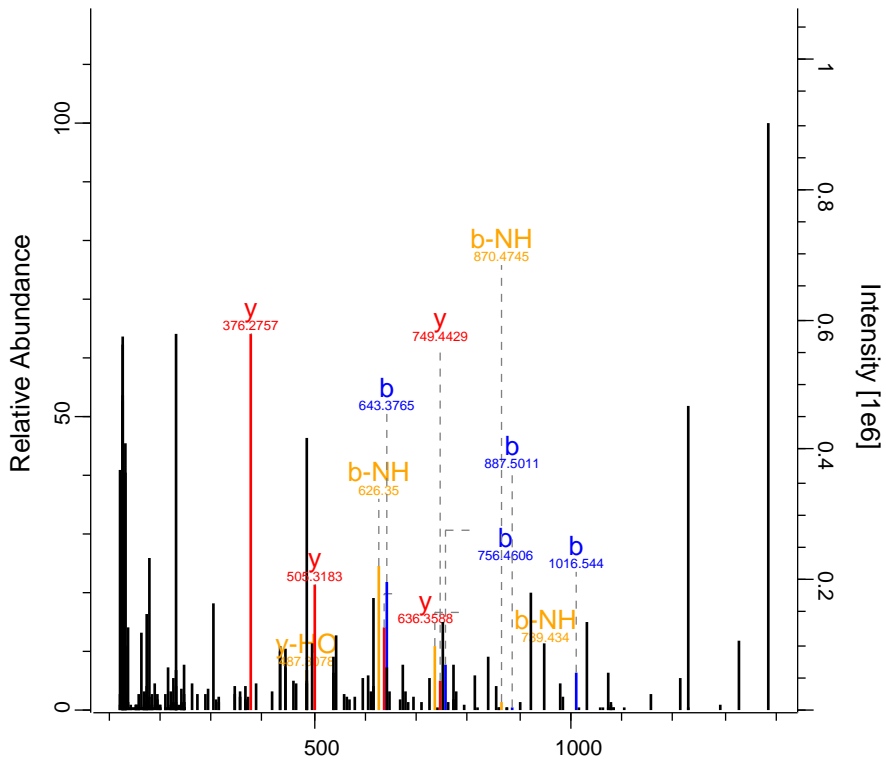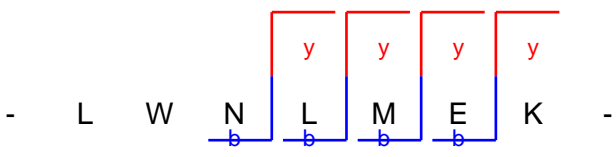

RO-QC-160121\_ZackD\_SS\_Set\_02\_Fraction 11029 FTMS; HC 89.14 464.61 KCNV2

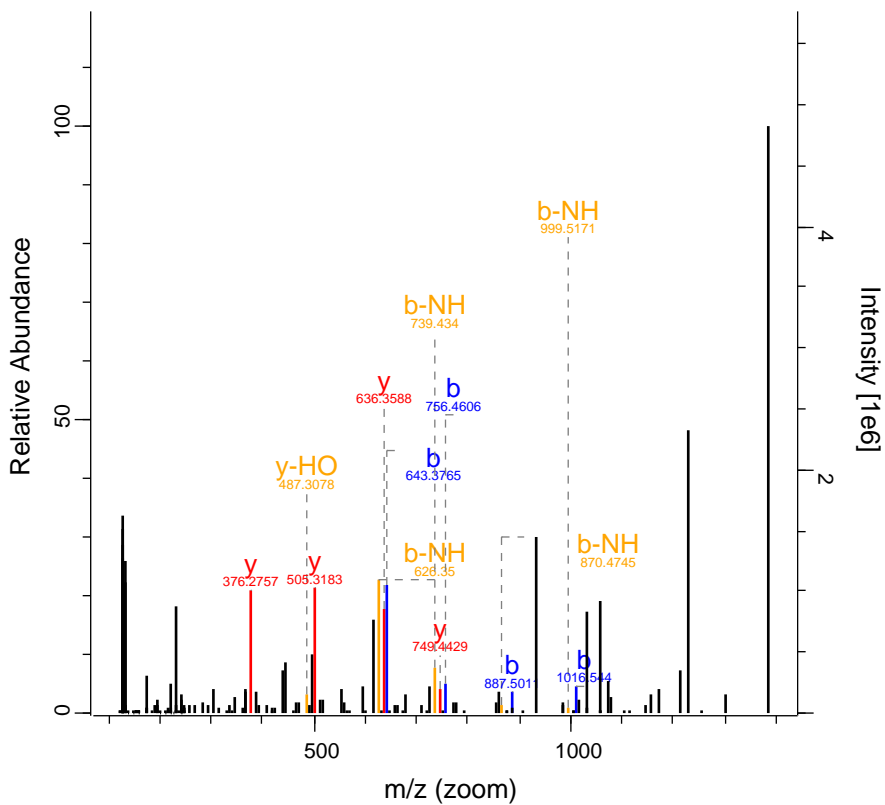

RO-QC-160121\_ZackD\_SS\_Set\_02\_Fractic 11169 FTMS; HC 86.9 1035.99 MRC1

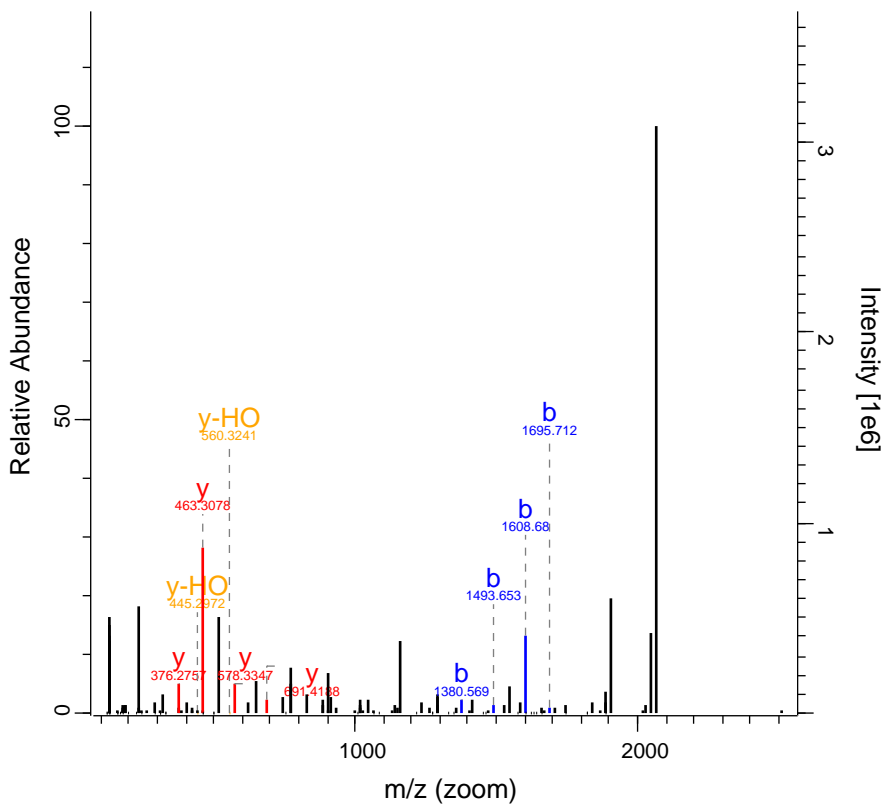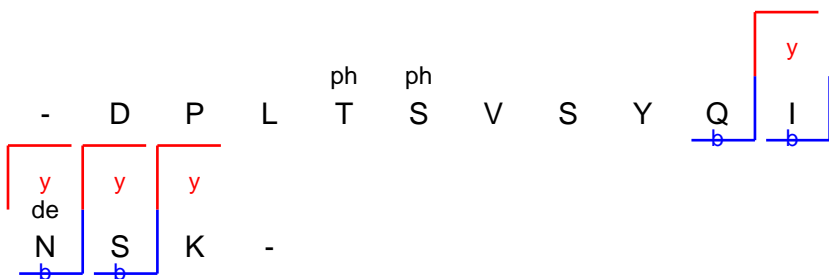



RO-QC-160121\_ZackD\_SS\_Set\_02\_Fraction11320 FTMS; HC 77.74 374.56 TXNDC16

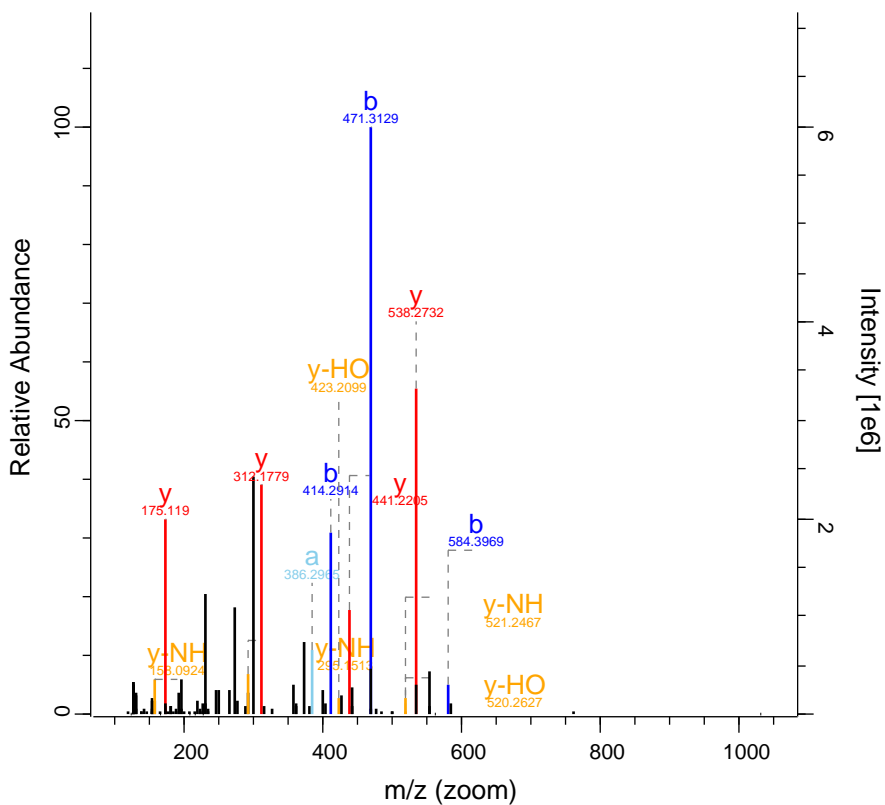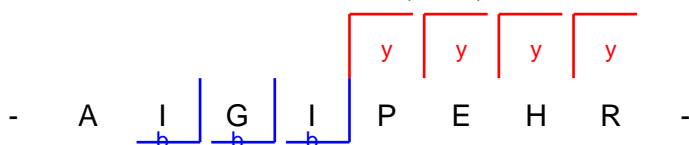

RO-QC-160121\_ZackD\_SS\_Set\_02\_Fractic 11382 FTMS; HC 67.73 1035.99 MRC1

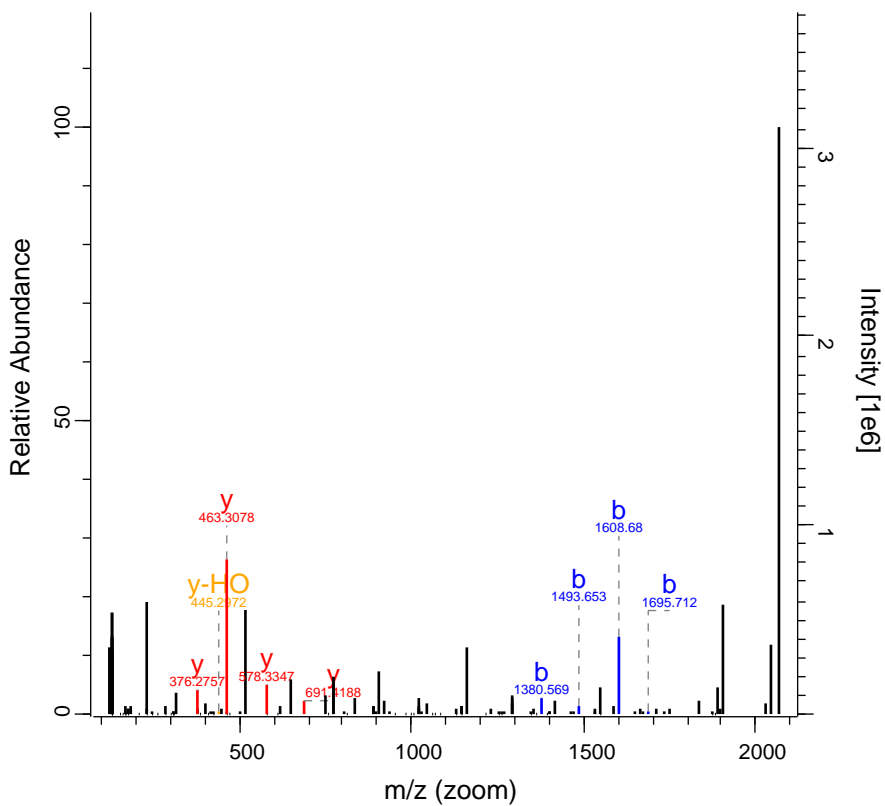

RO-QC-160121\_ZackD\_SS\_Set\_02\_Fractio 12663 FTMS; HC 156.48 779.95 WRAP73

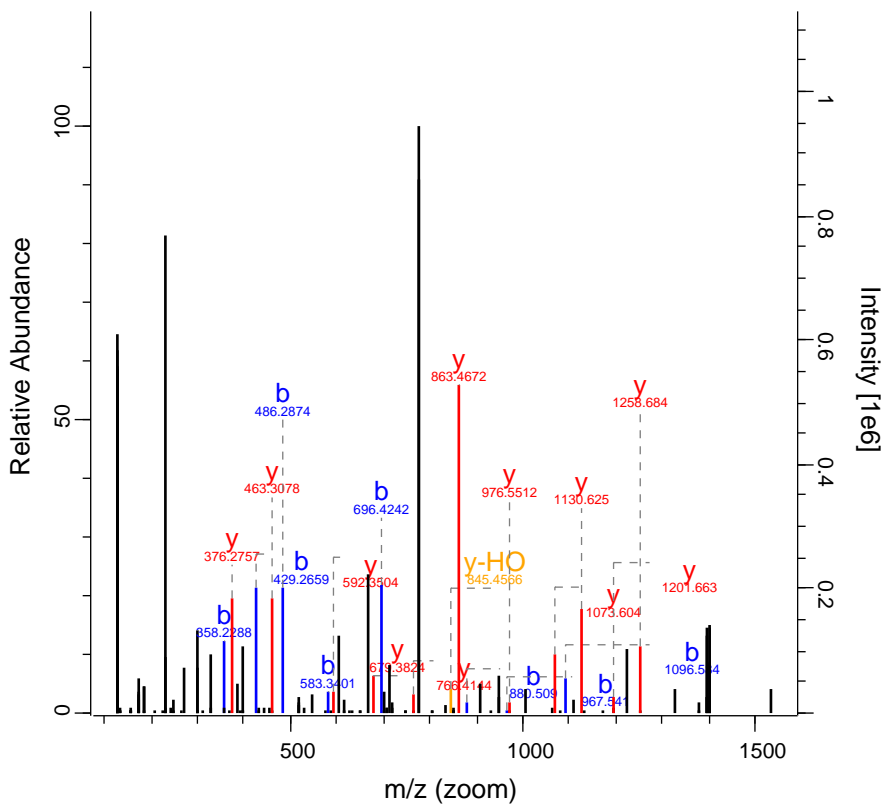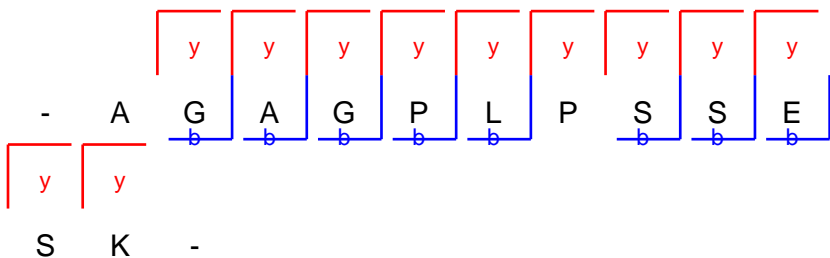

RO-QC-160121\_ZackD\_SS\_Set\_02\_Fractio 13089 FTMS; HC 139.96 753.92 MED28

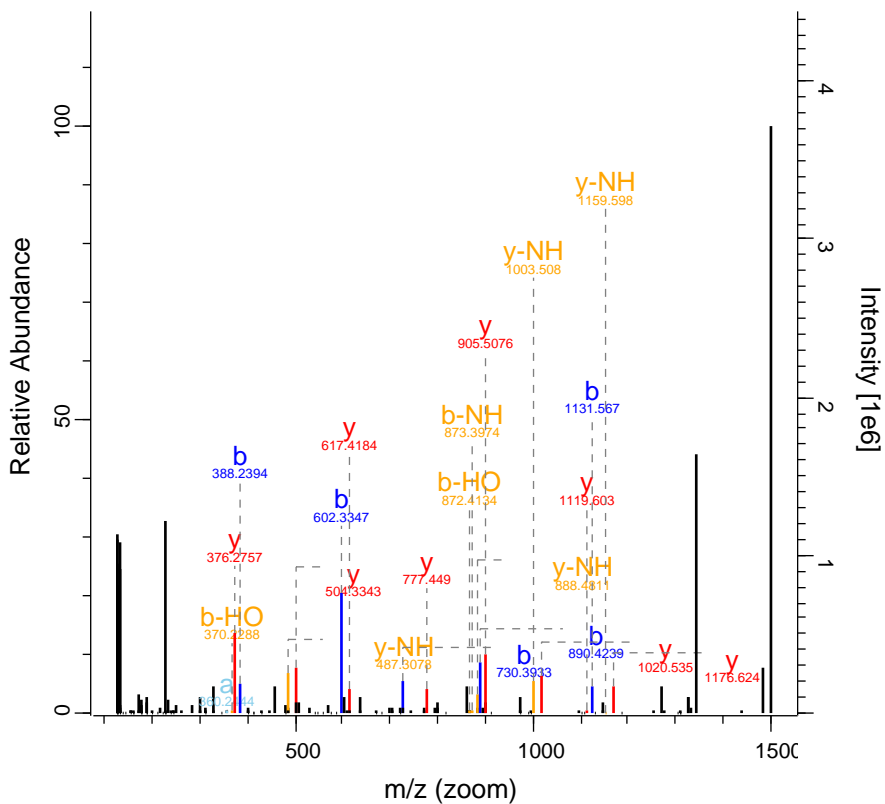

m/z (zoom)

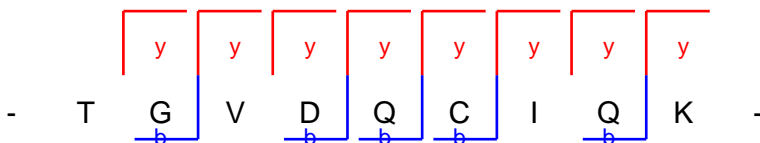

RO-QC-160121\_ZackD\_SS\_Set\_02\_Fraction13102 FTMS; HC 72.64 502.95 MED28

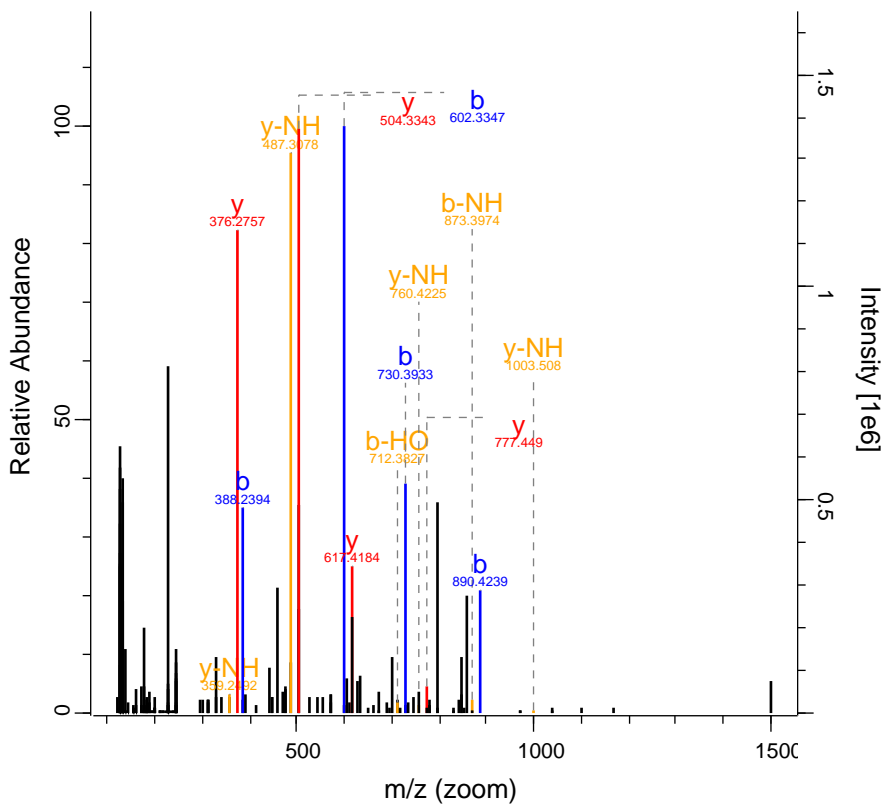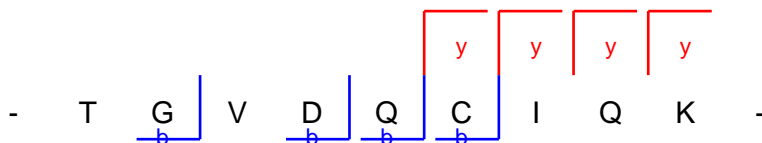

RO-QC-160121\_ZackD\_SS\_Set\_02\_Fraction 13248 FTMS; HC 99.79 740.35 ANAPC16

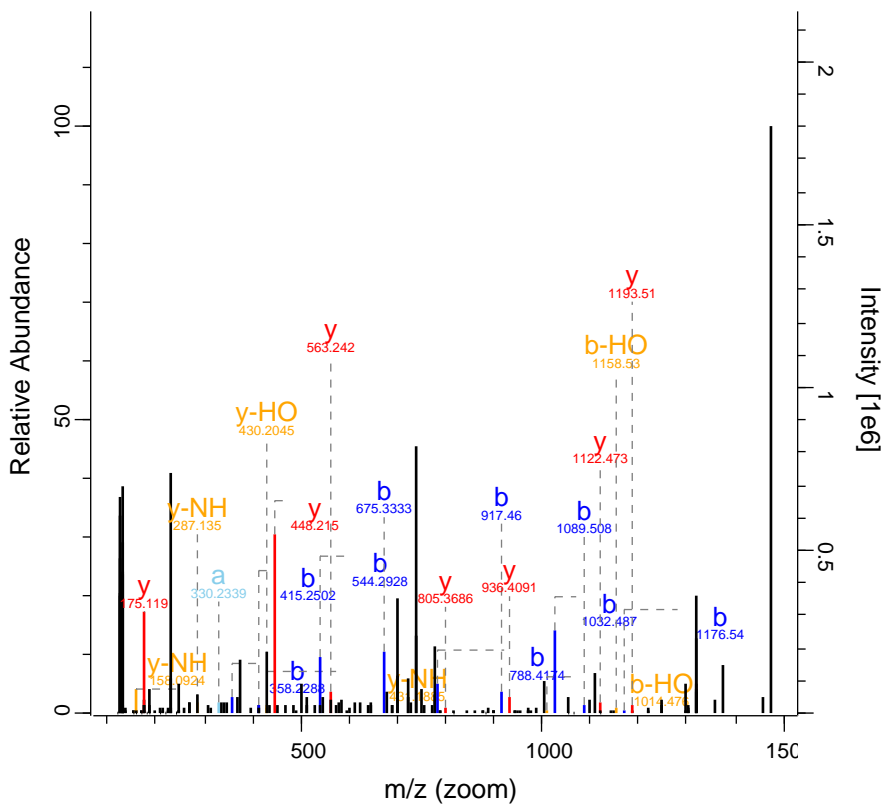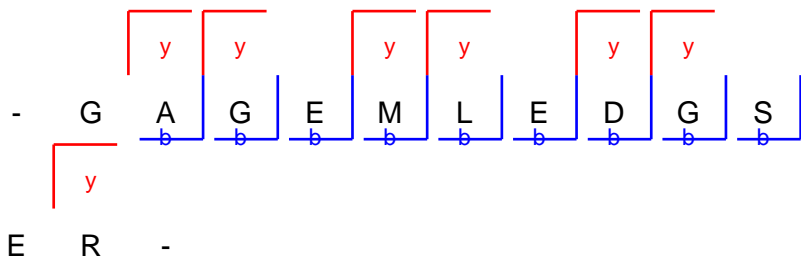

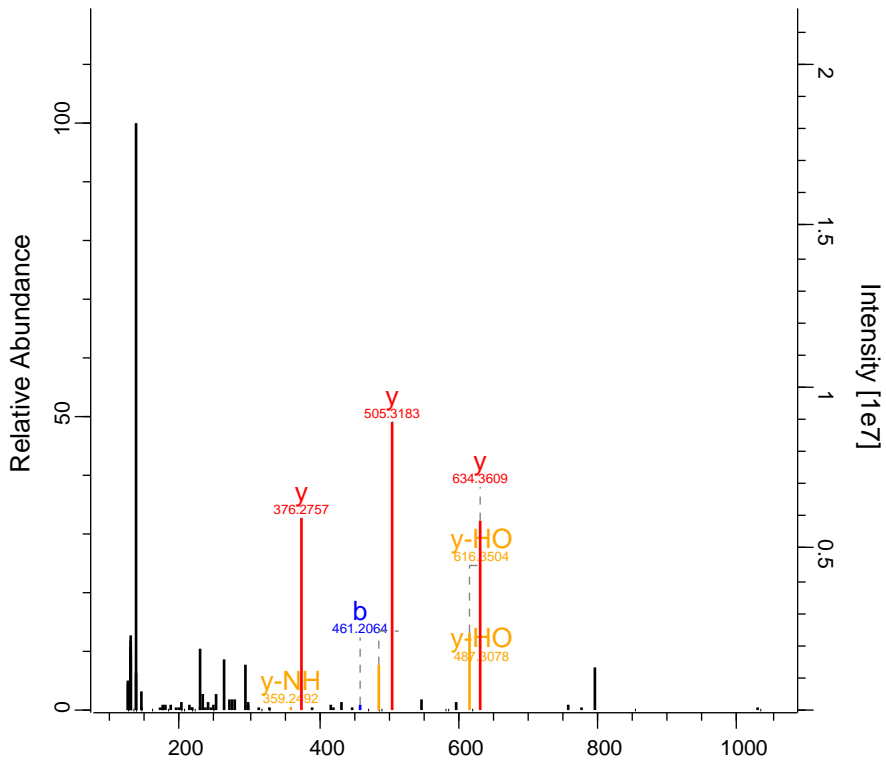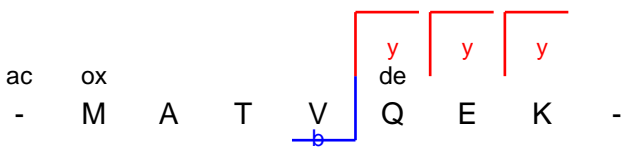

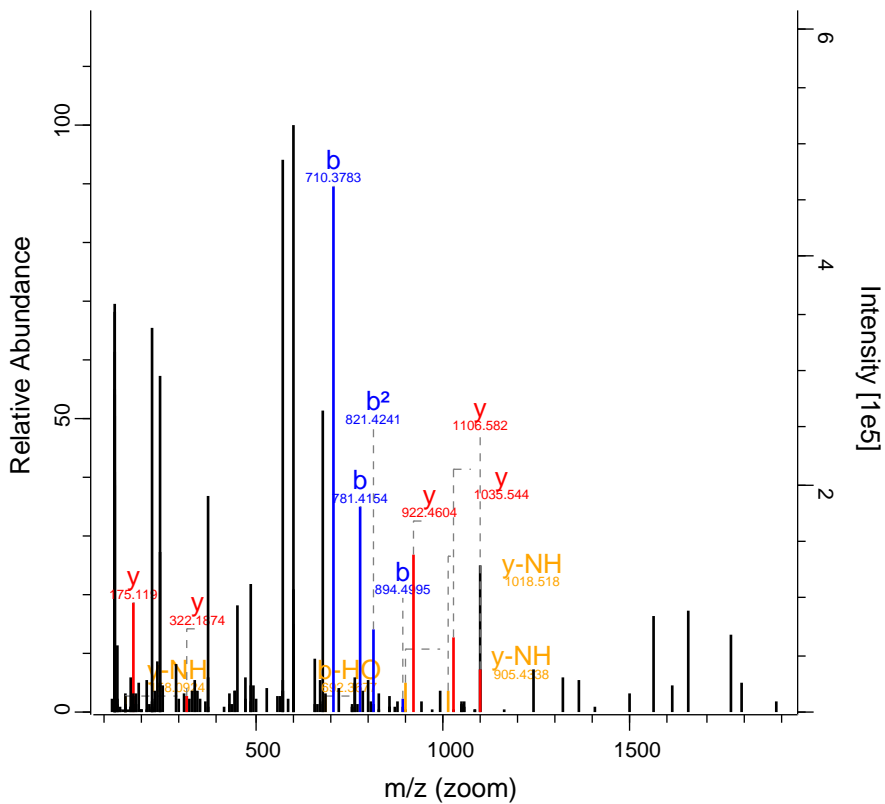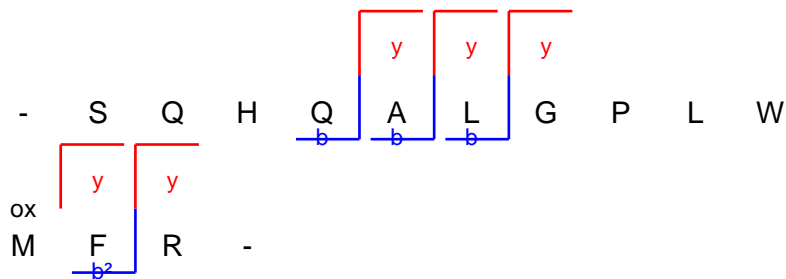



RO-QC-160121\_ZackD\_SS\_Set\_02\_Fractio 14892 FTMS; HC 152.27 745.39 HS6ST1

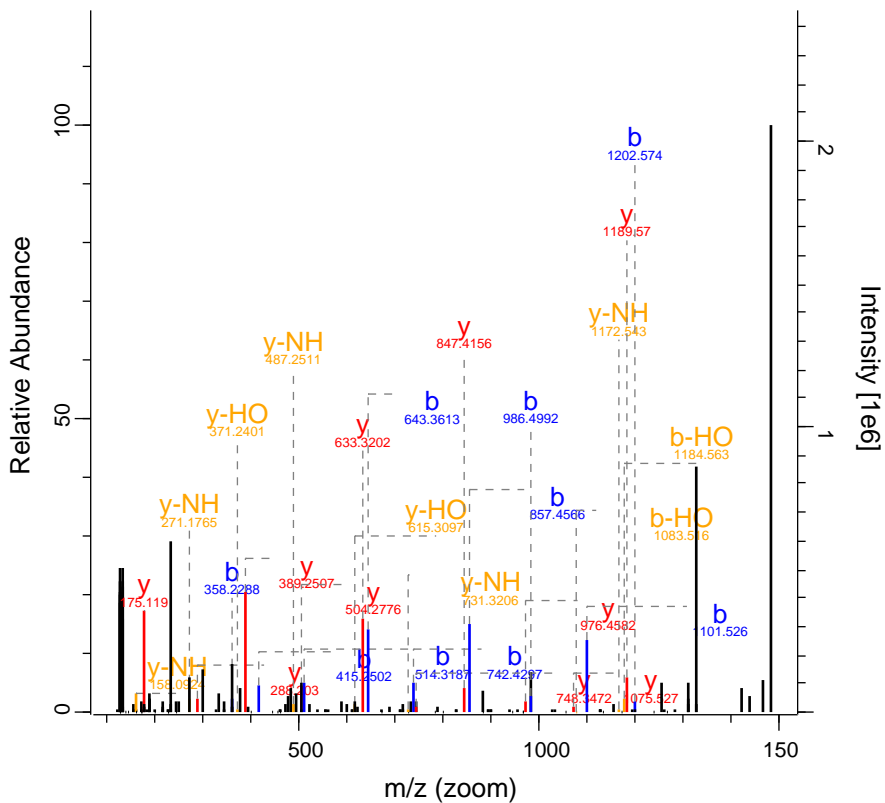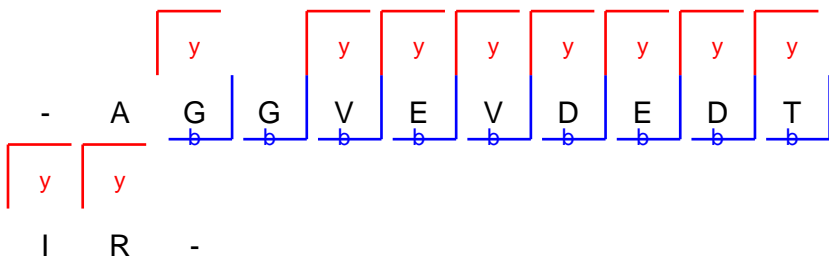

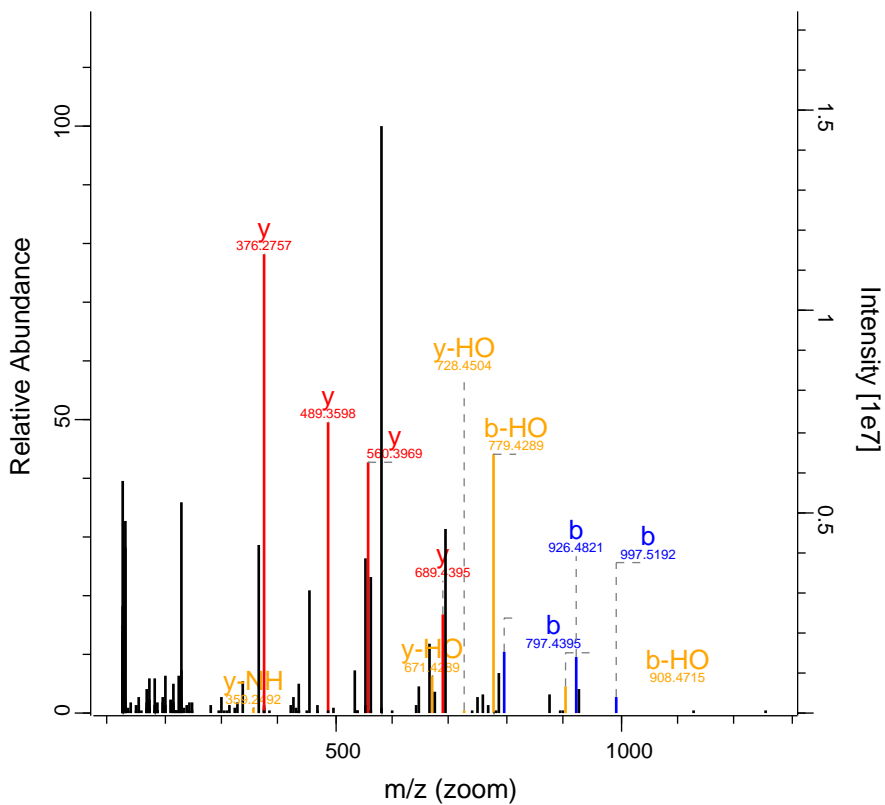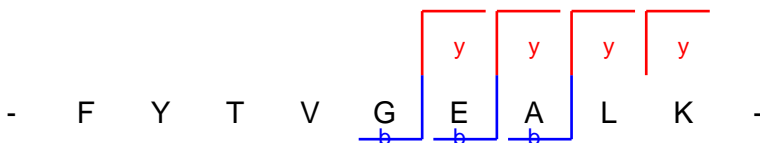

Raw File

Scan Method

Score

m/z

RO-QC-160121\_ZackD\_SS\_Set\_02\_Fraction\_2

15142

FTMS; HCD

118.01

430.93

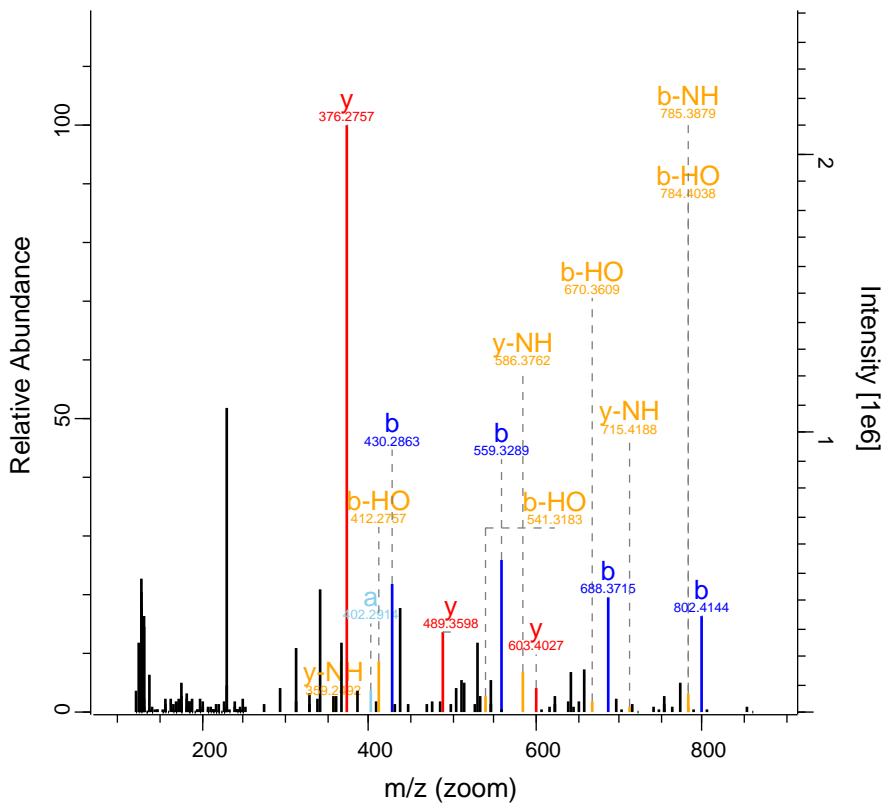

m/z (zoom)

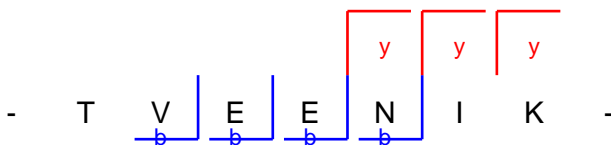

RO-QC-160121\_ZackD\_SS\_Set\_02\_Fraction 15283 FTMS; HC 67.99 932.81 JAG1

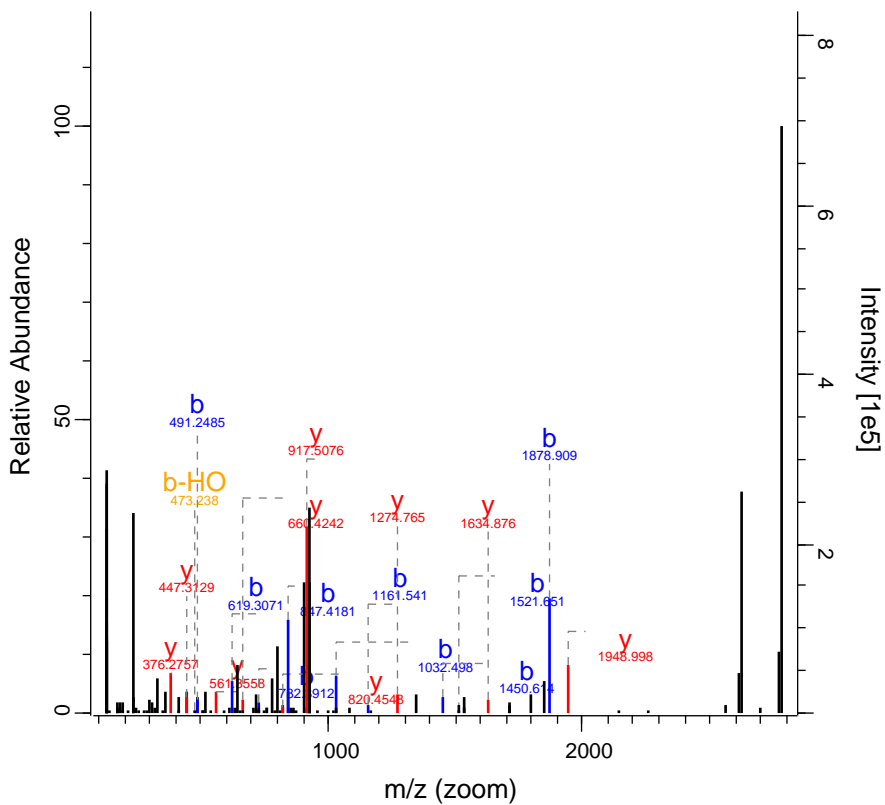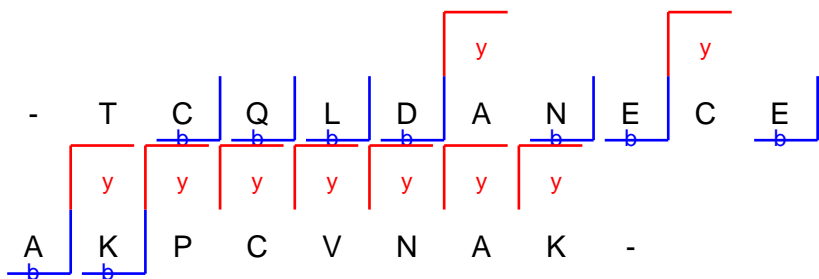

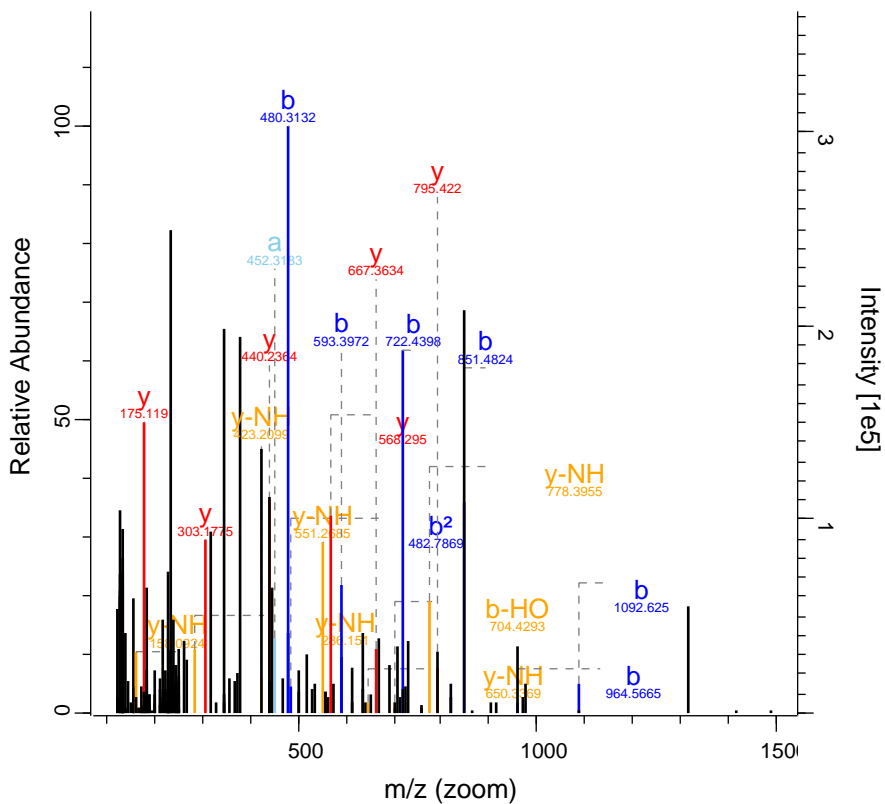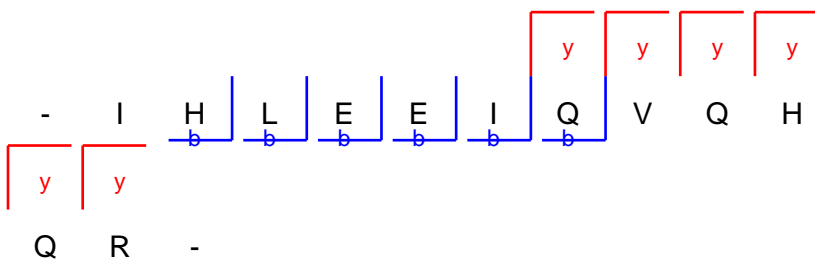

| Raw File                                | Scan  | Method    | Score | m/z    |
|-----------------------------------------|-------|-----------|-------|--------|
| RO-QC-160121_ZackD_SS_Set_02_Fraction_2 | 15333 | FTMS; HCD | 77.98 | 431.26 |

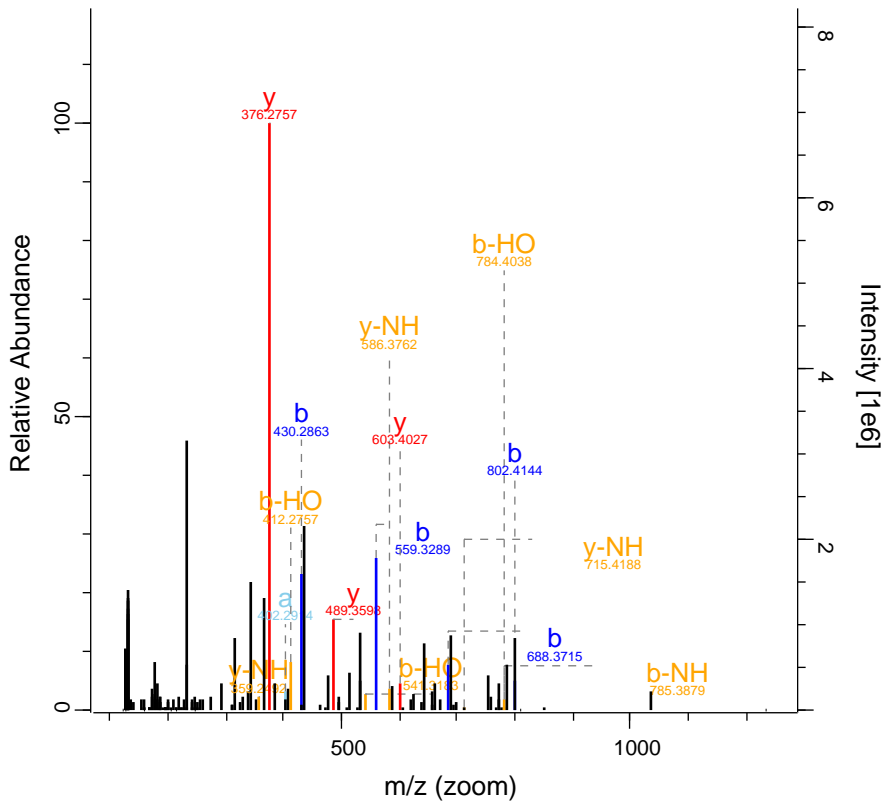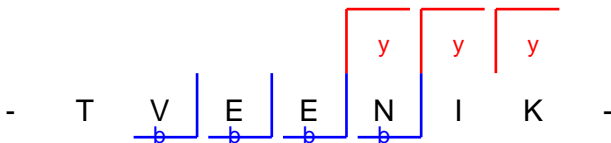

Raw File

Scan Method Score m/z

RO-QC-160121\_ZackD\_SS\_Set\_02\_Fraction\_2

16099 FTMS; HCD 54.61 533.94

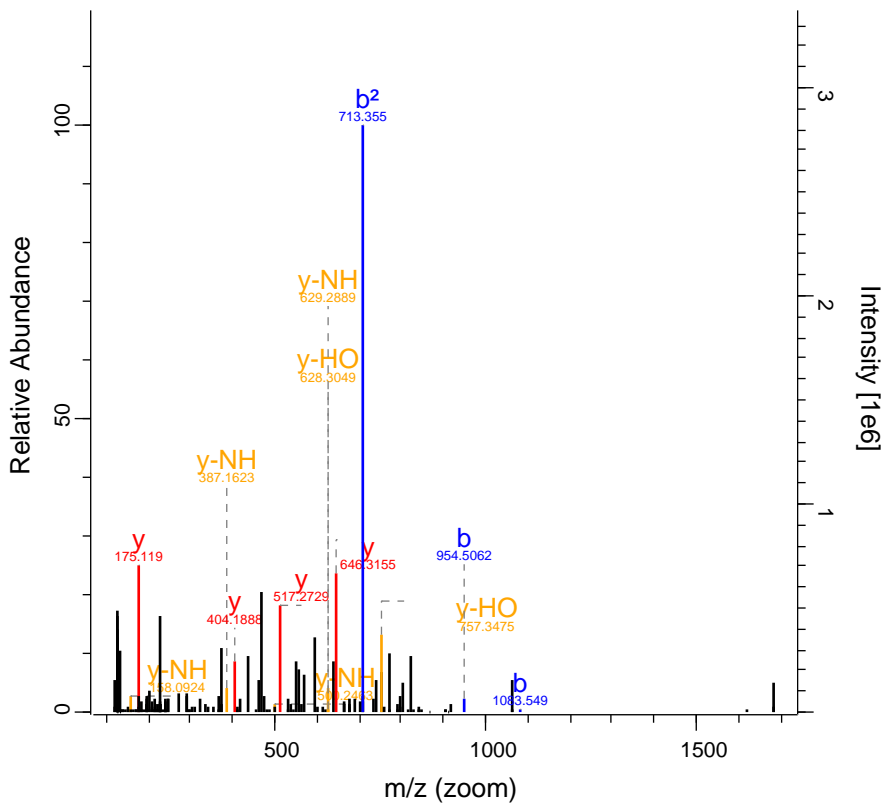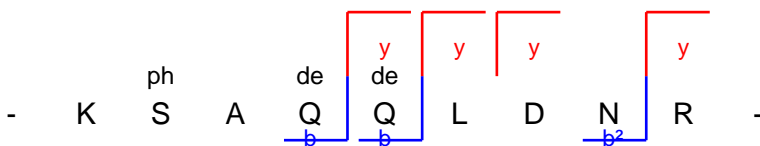

RO-QC-160121\_ZackD\_SS\_Set\_02\_Fractio 16264 FTMS; HC 140.78 810.42 NR1H2

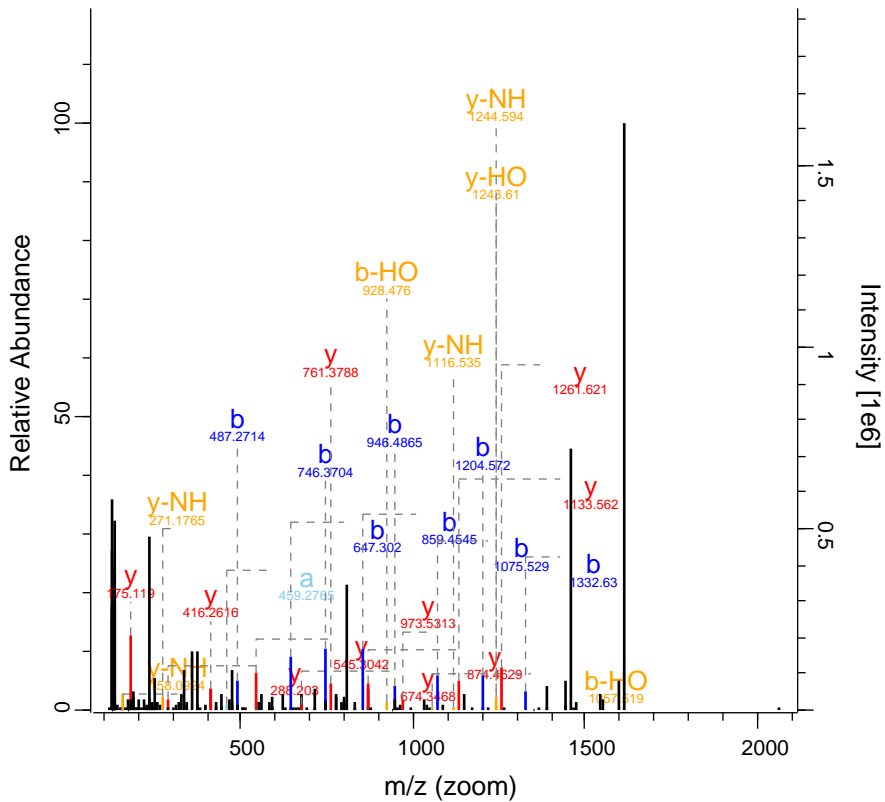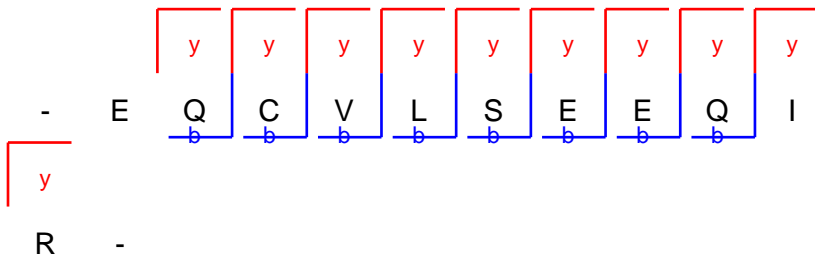





RO-QC-160121\_ZackD\_SS\_Set\_02\_Fractio 16452 FTMS; HC 126.57 555.31 GINS2

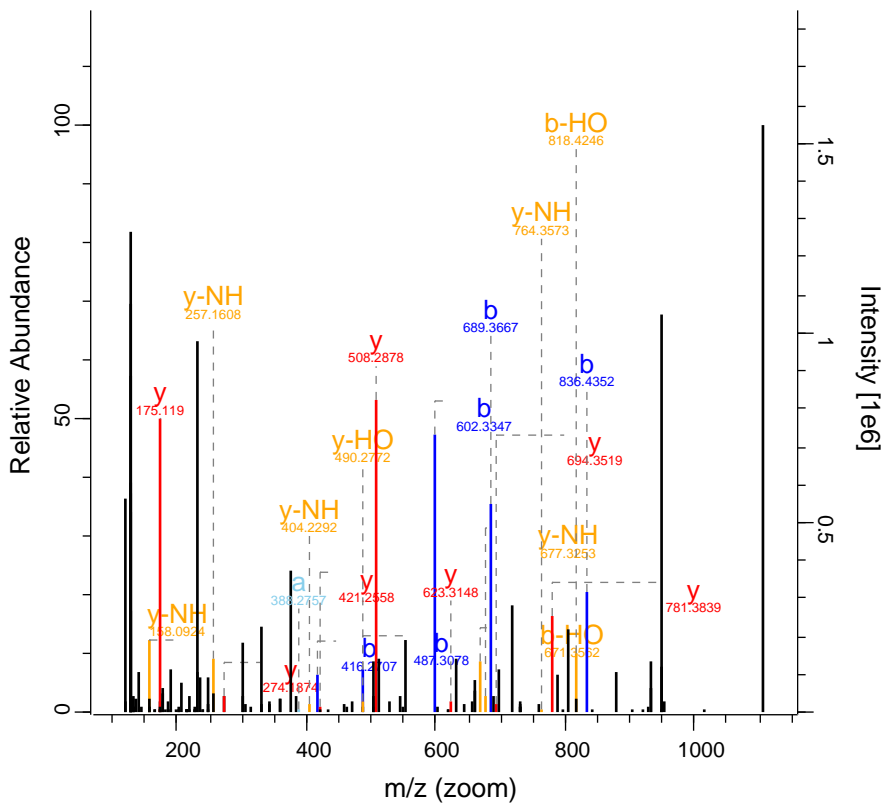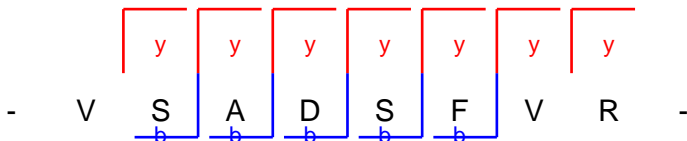

RO-QC-160121\_ZackD\_SS\_Set\_02\_Fraction 16546 FTMS; HC 55.75 827.92 IQCB1

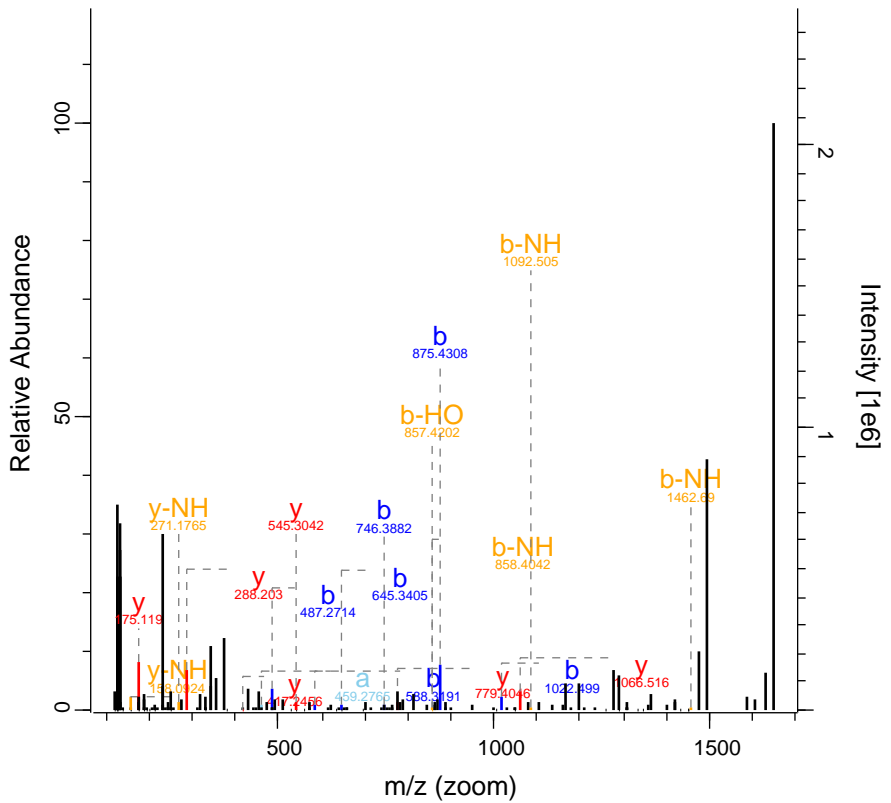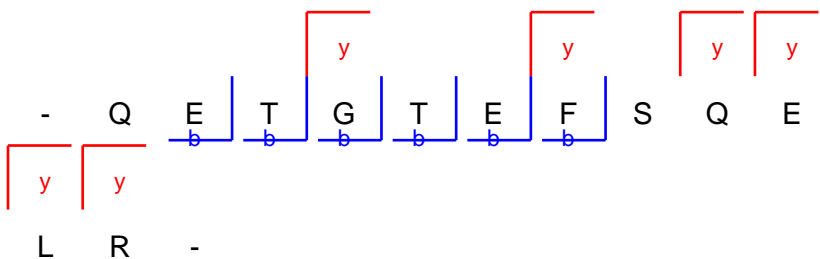

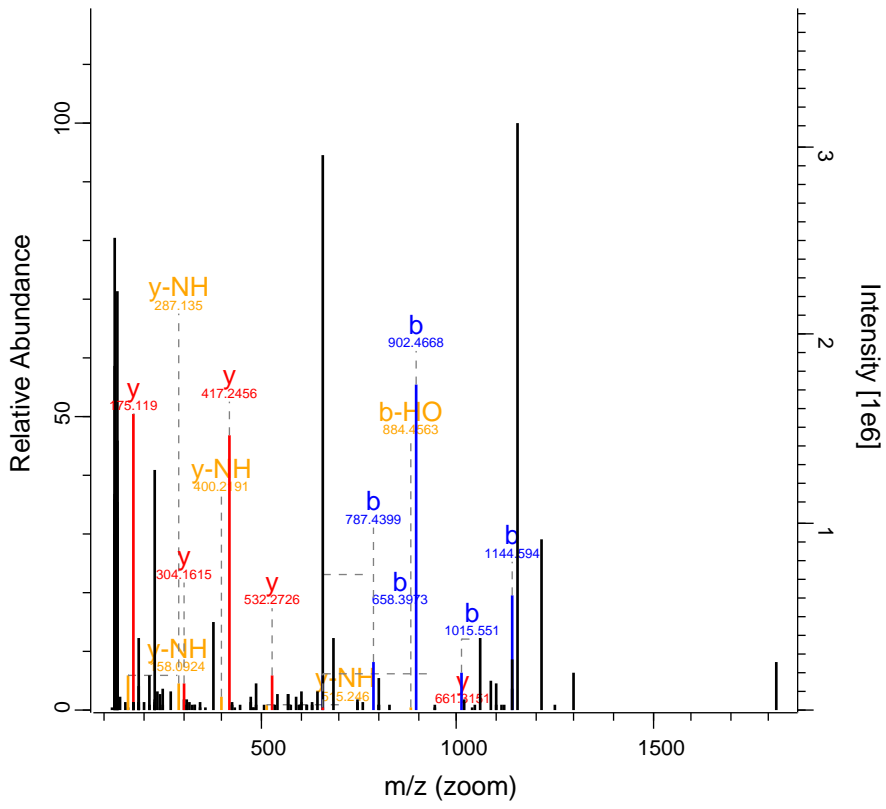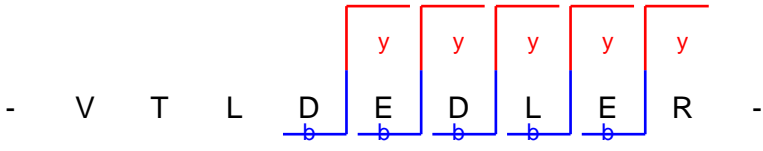

RO-QC-160121\_ZackD\_SS\_Set\_02\_Fractio 17590 FTMS; HC 101.65 691.39 MTERF3

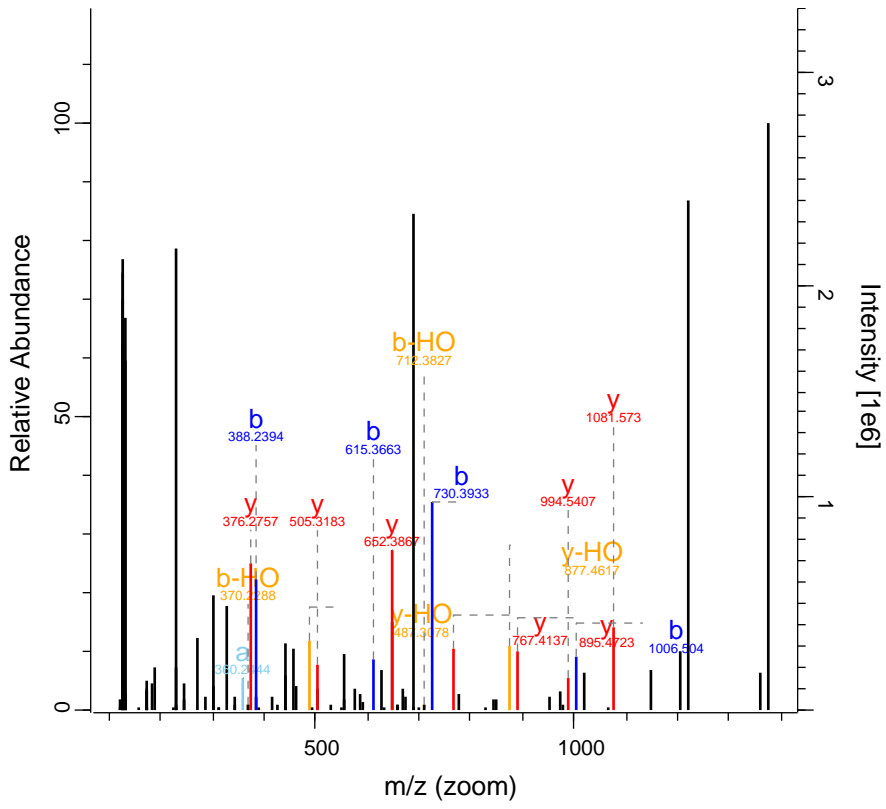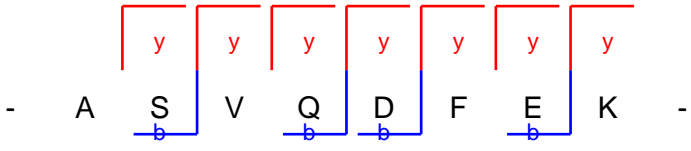

RO-QC-160121\_ZackD\_SS\_Set\_02\_Fraction 17617 FTMS; HC 86.67 461.26 MTERF3

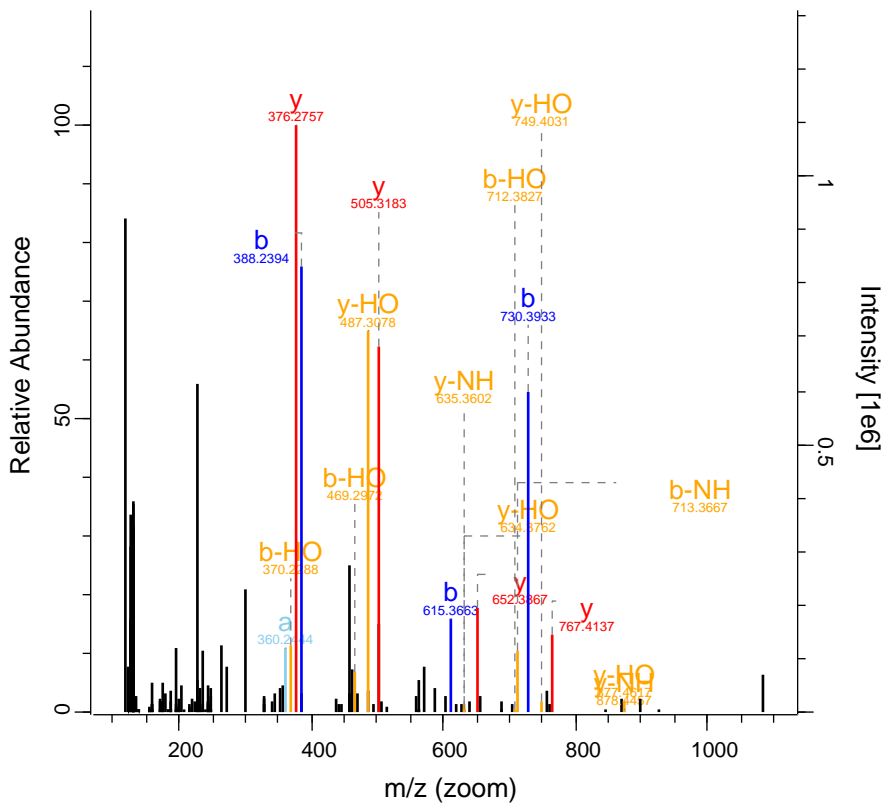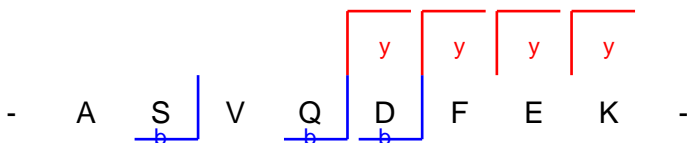

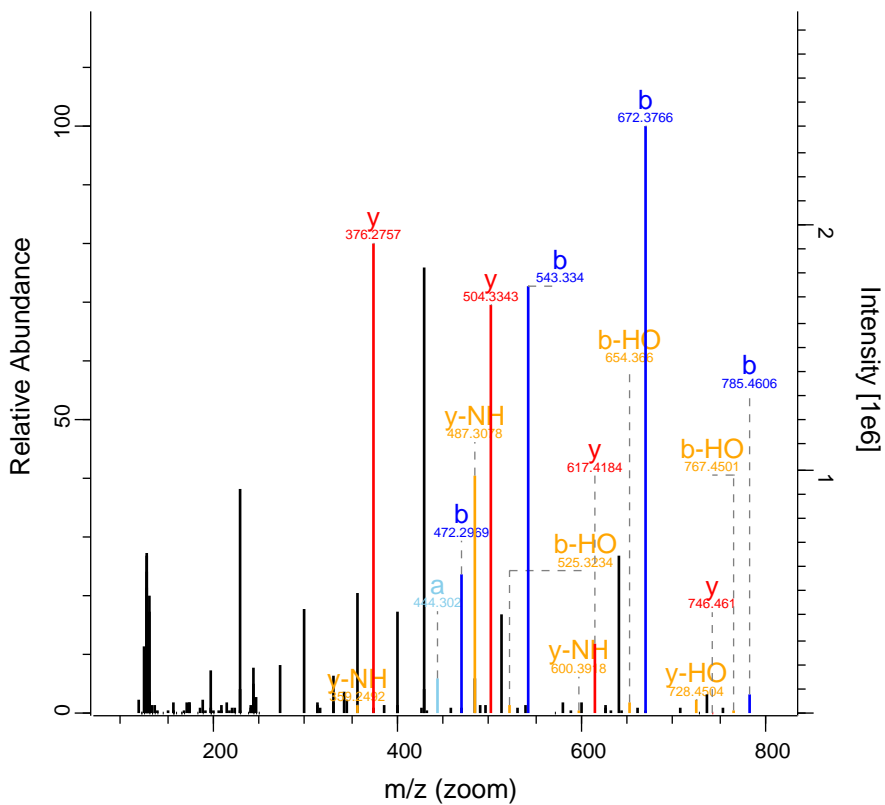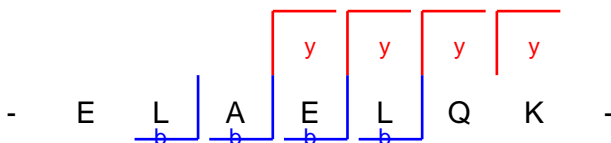

Raw File

Scan Method Score m/z

RO-QC-160121\_ZackD\_SS\_Set\_02\_Fraction\_2

17973

FTMS; HCD 58.43

804.94

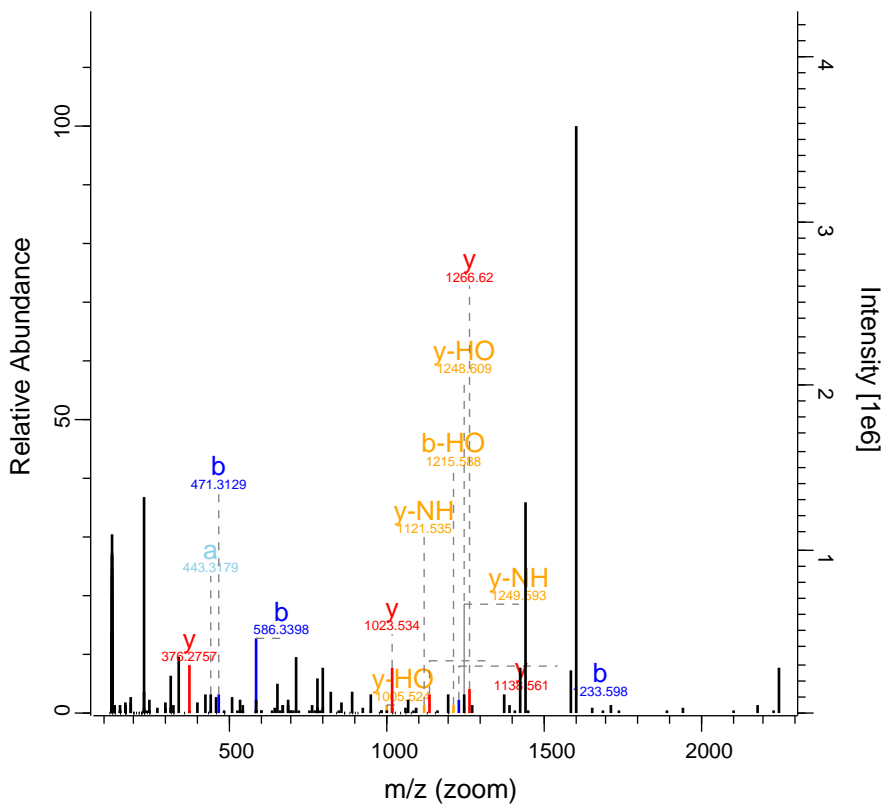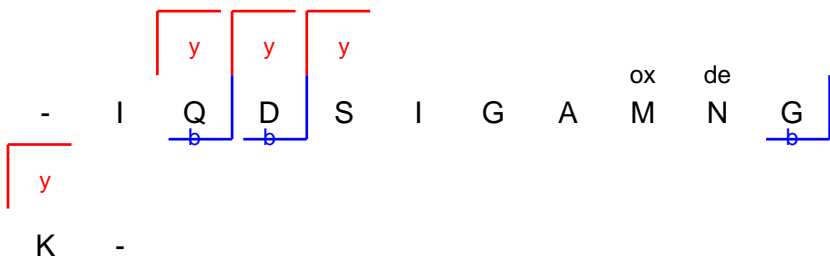



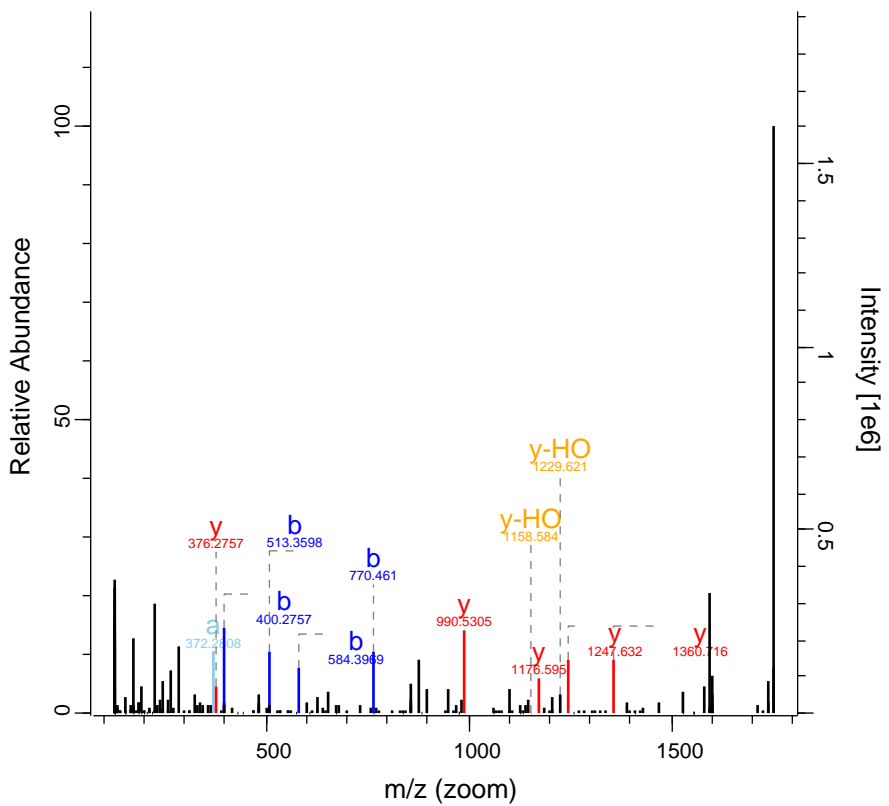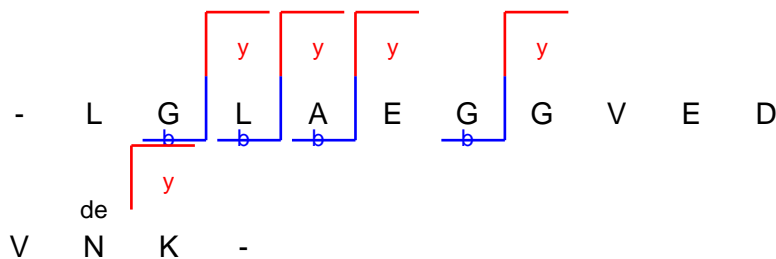

V N K -

RO-QC-160121\_ZackD\_SS\_Set\_02\_Fraction 19215 FTMS; HC 40.55 616.07 GRM4

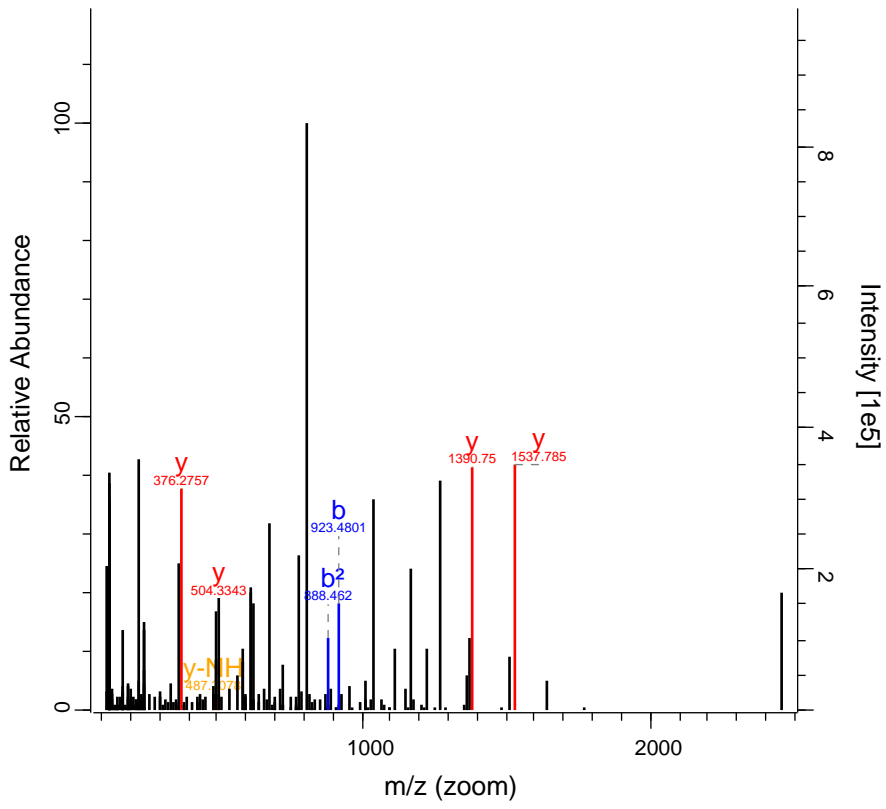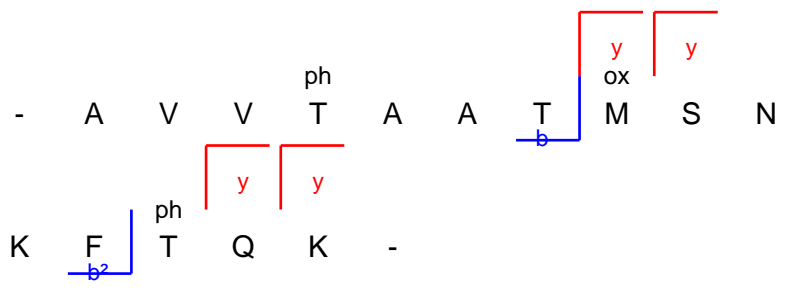

RO-QC-160121\_ZackD\_SS\_Set\_02\_Fraction 19475 FTMS; HC 89.11 818.11 FIGNL1

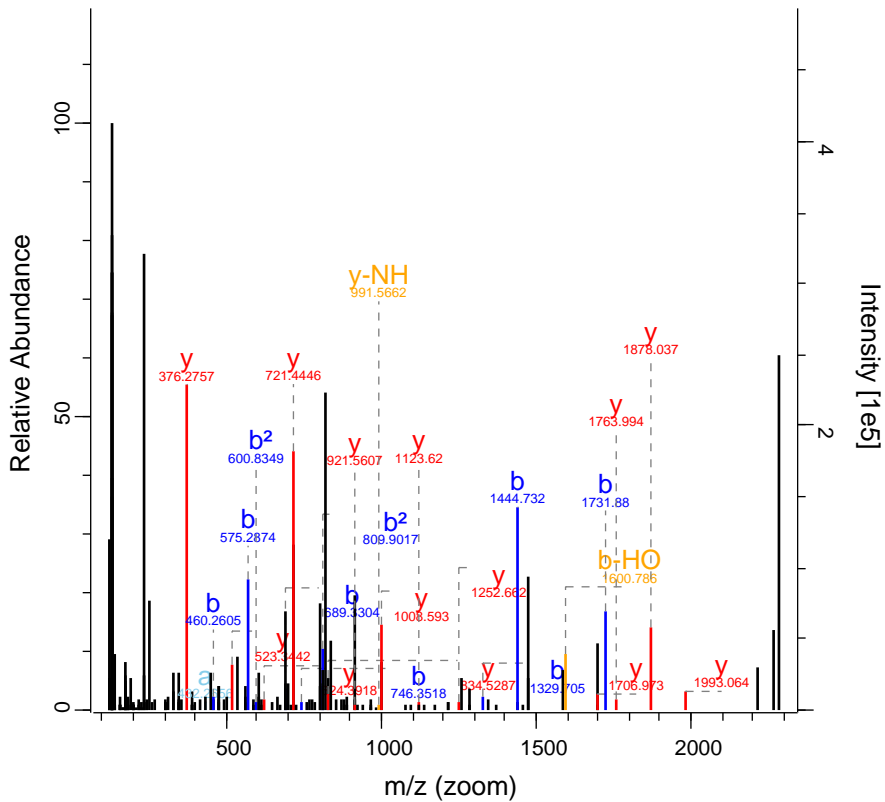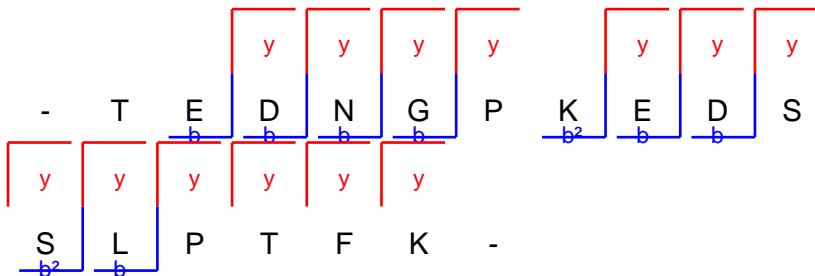

RO-QC-160121\_ZackD\_SS\_Set\_02\_Fraction 19504 FTMS; HCl 73.93 546 ABHD6

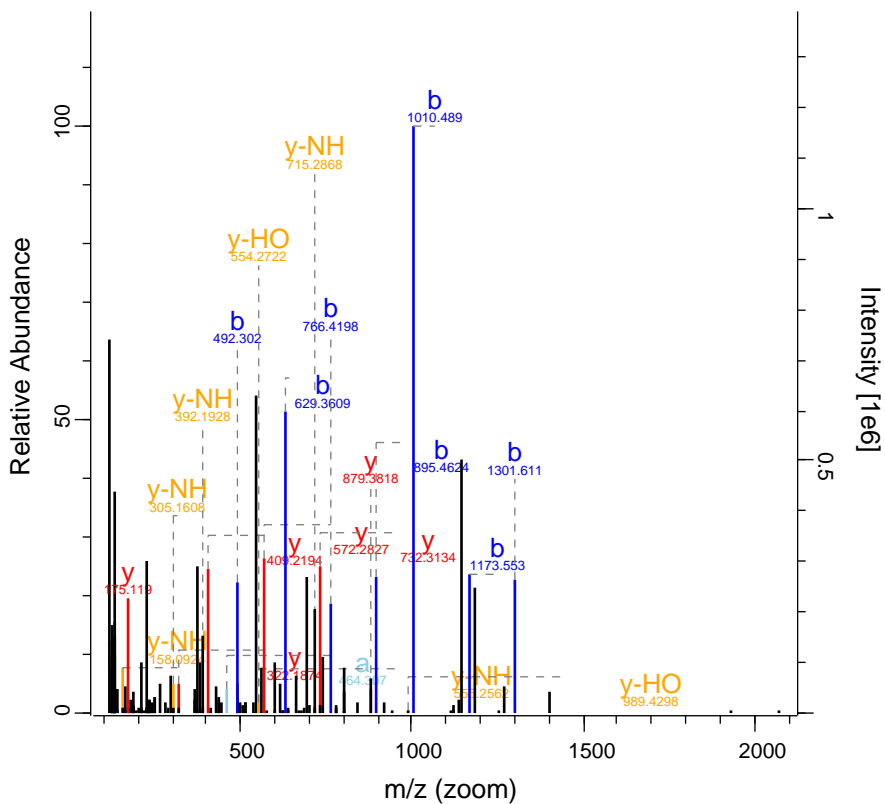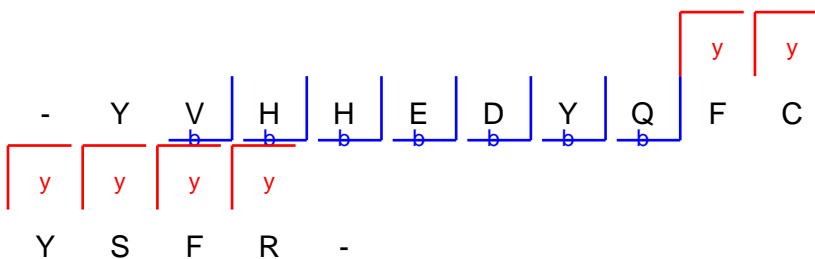

| Raw File                                | Scan  | Method    | Score | m/z    |
|-----------------------------------------|-------|-----------|-------|--------|
| RO-QC-160121_ZackD_SS_Set_02_Fraction_2 | 19613 | FTMS; HCD | 78.66 | 895.01 |

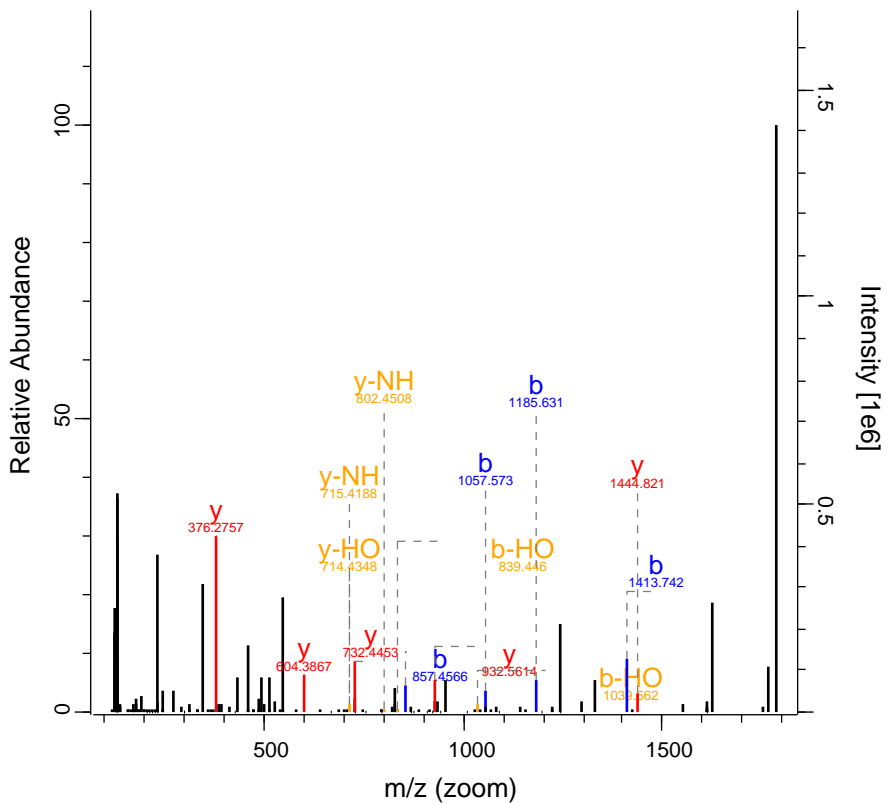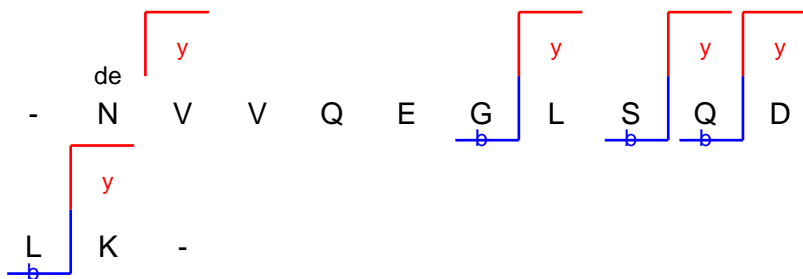

RO-QC-160121\_ZackD\_SS\_Set\_02\_Fraction 19795 FTMS; HC 99.82 742.42 DGKE

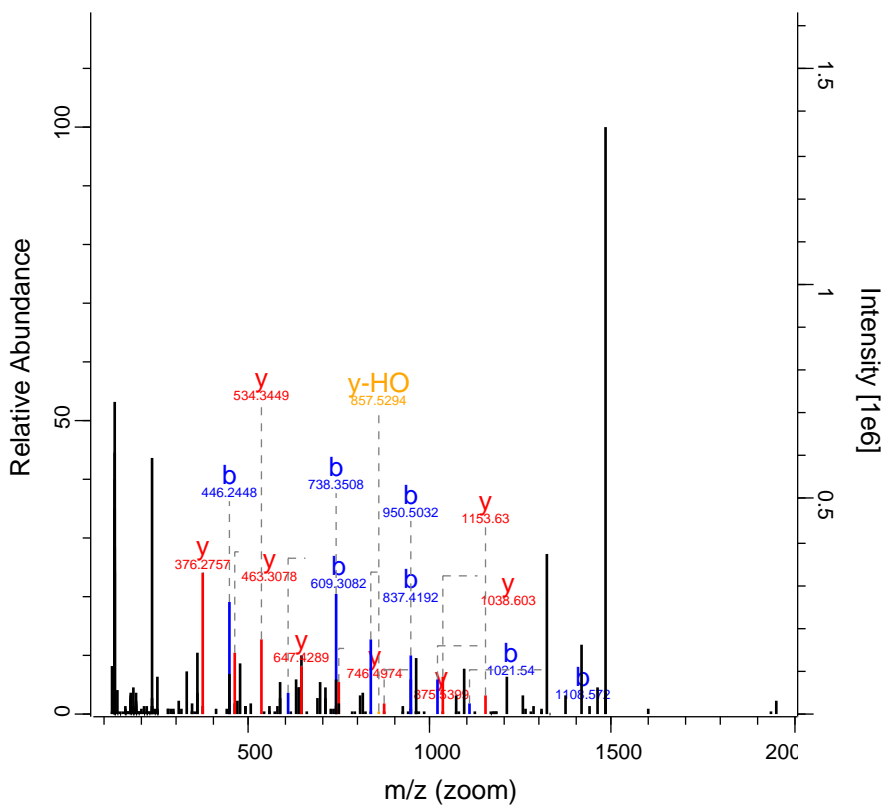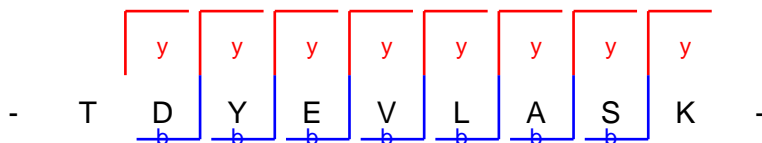

RO-QC-160121\_ZackD\_SS\_Set\_02\_Fraction 19931 FTMS; HC 43.28 495.28 DGKE

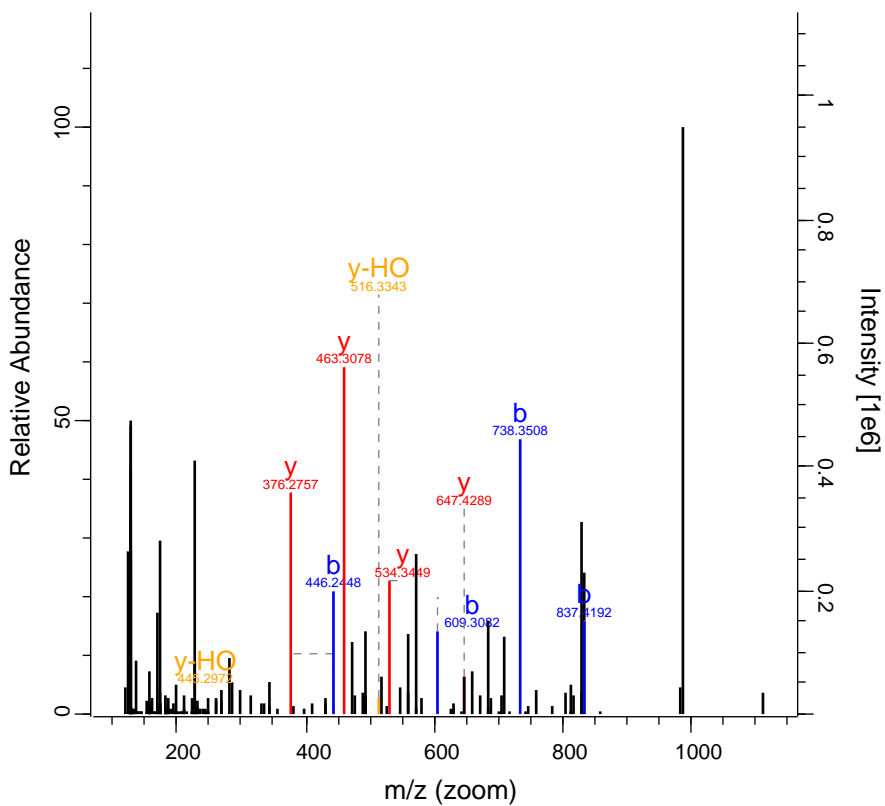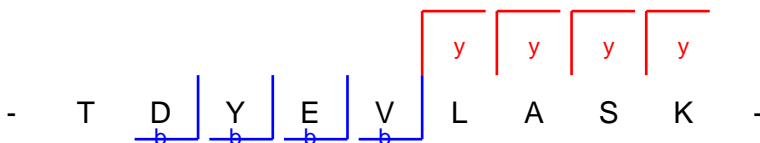

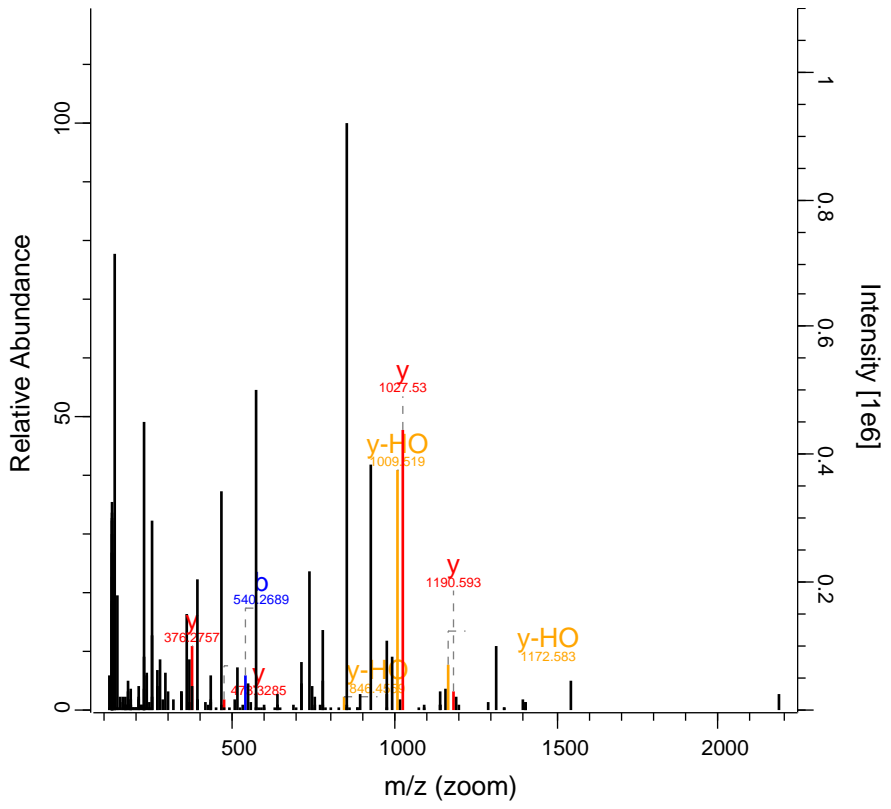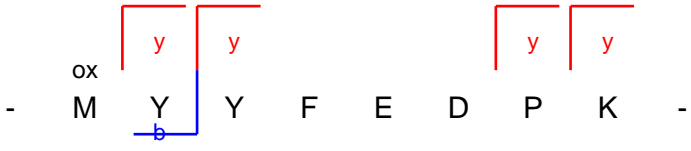



RO-QC-160121\_ZackD\_SS\_Set\_02\_Fraction 20115 FTMS; HC 40.99 488.94 PROX1

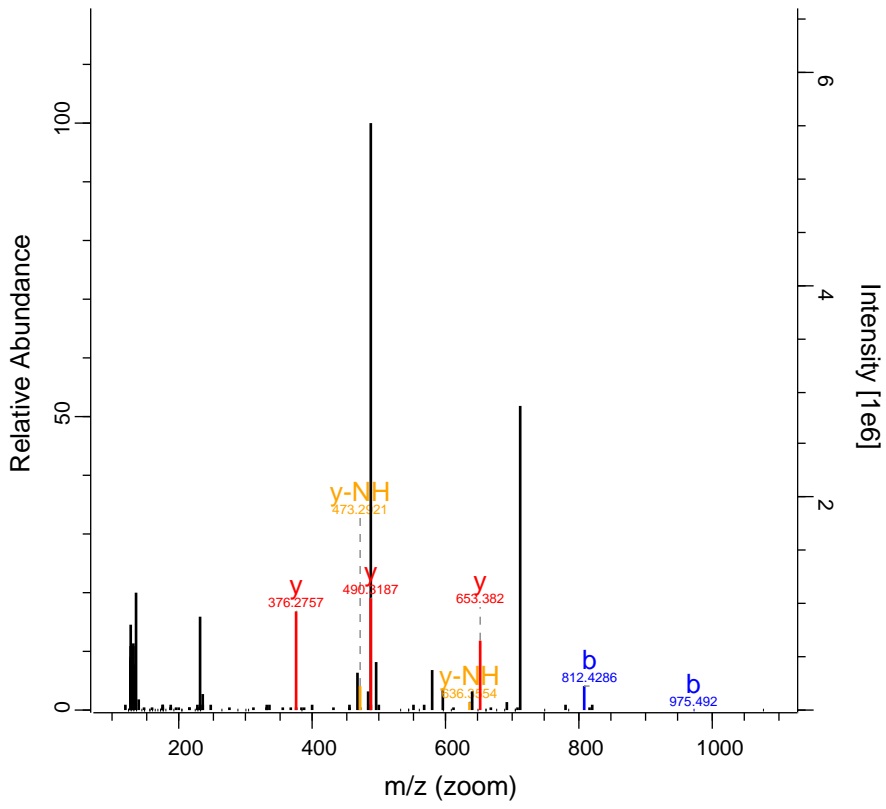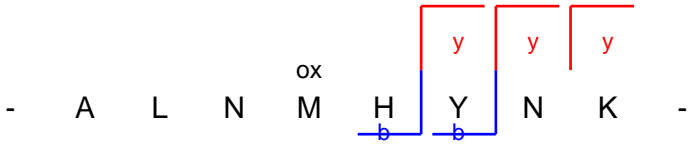

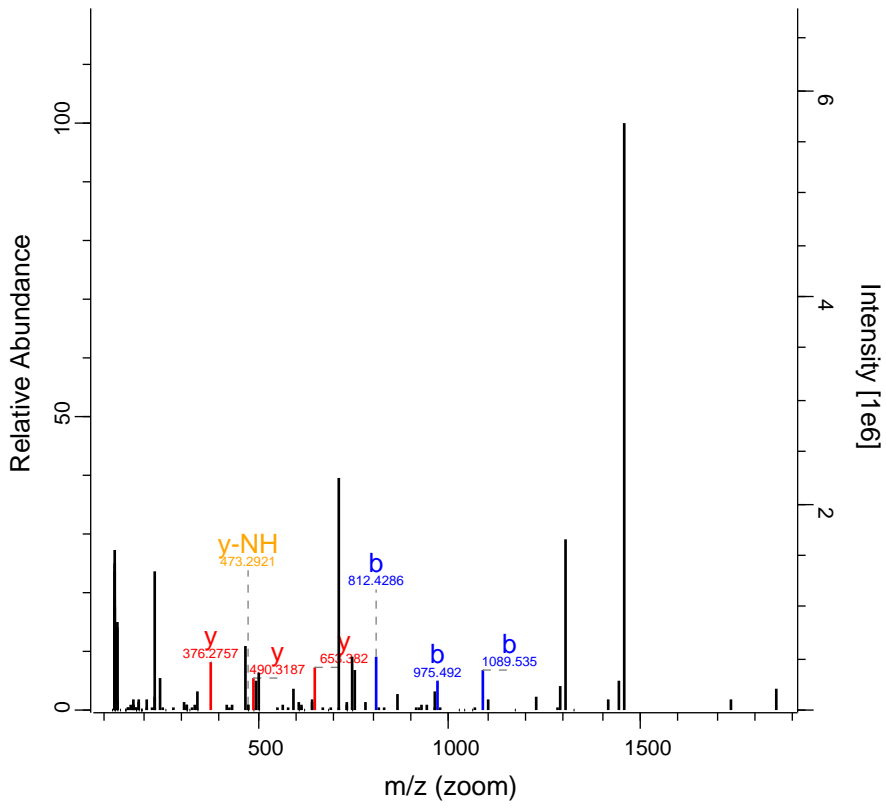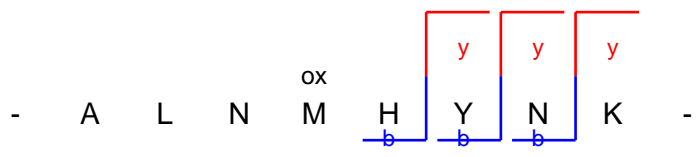

RO-QC-160121\_ZackD\_SS\_Set\_02\_Fractio 20250 FTMS; HC 126.71 731.86 GSX2

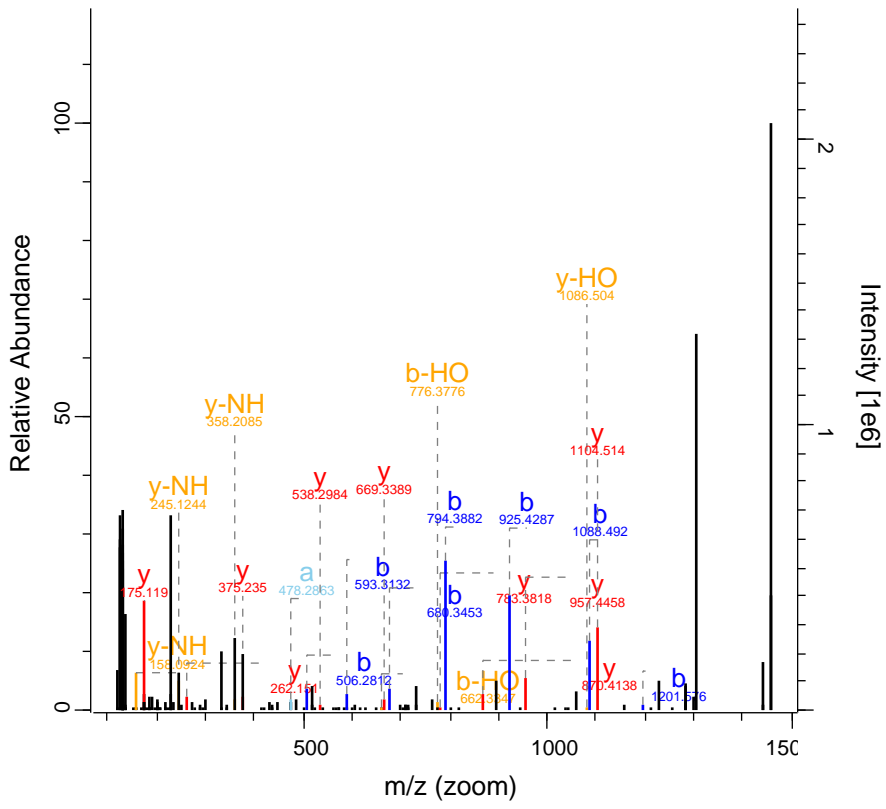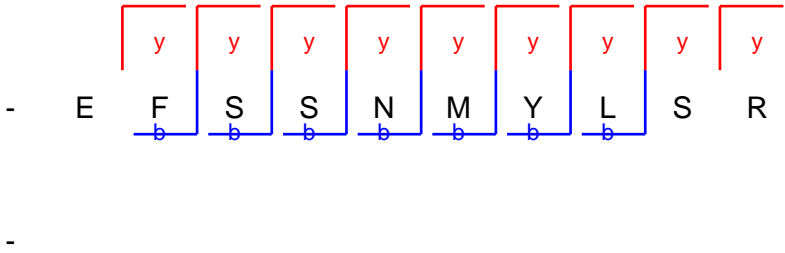

RO-QC-160121\_ZackD\_SS\_Set\_02\_Fractic 20369 FTMS; HC 113.24 1086.01 HIGD1A

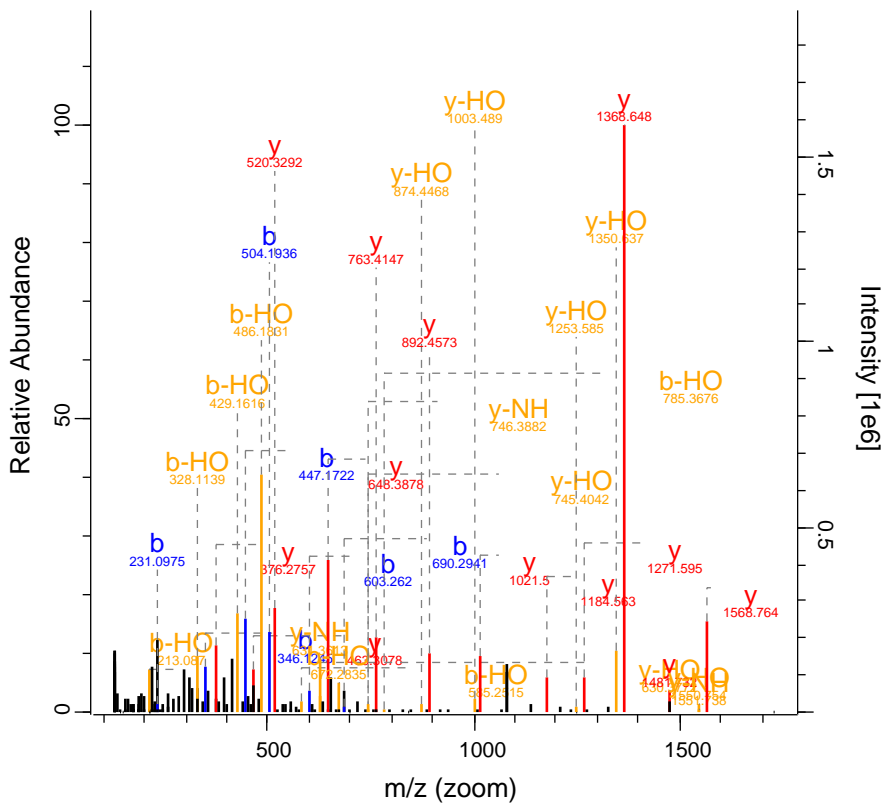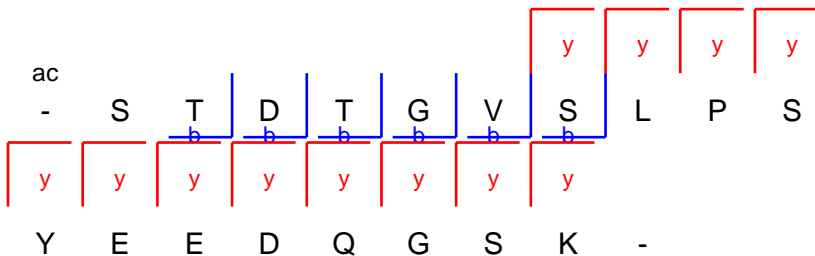

RO-QC-160121\_ZackD\_SS\_Set\_02\_Fraction 20422 FTMS; HC 93.75 724.35 HIGD1A

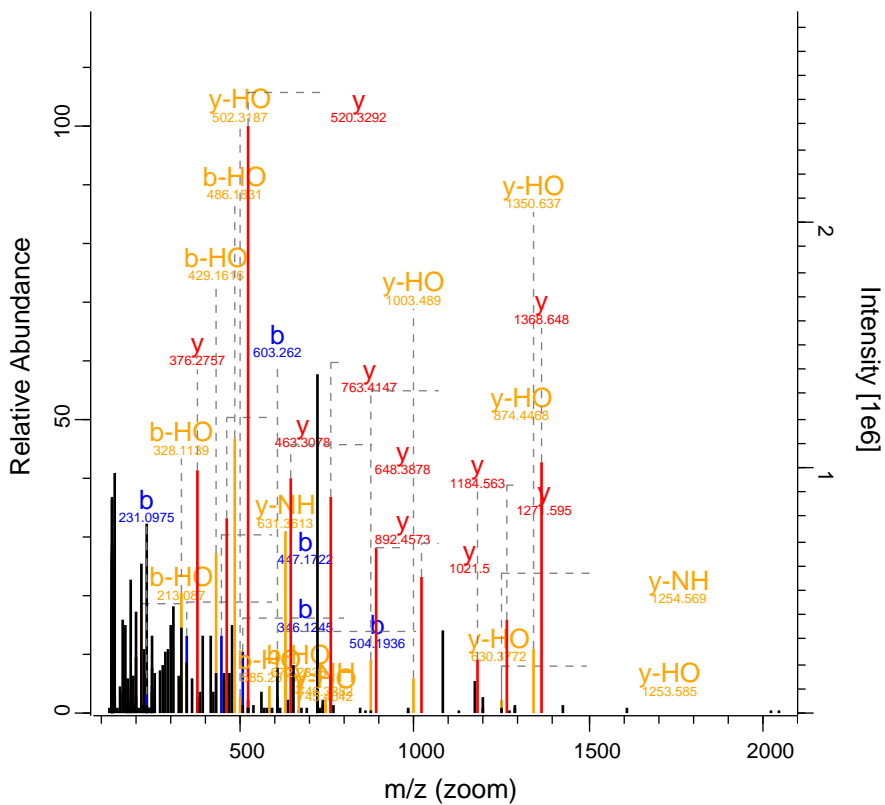

RO-QC-160121\_ZackD\_SS\_Set\_02\_Fractic 20570 FTMS; HC 146.07 1086.52 HIGD1A

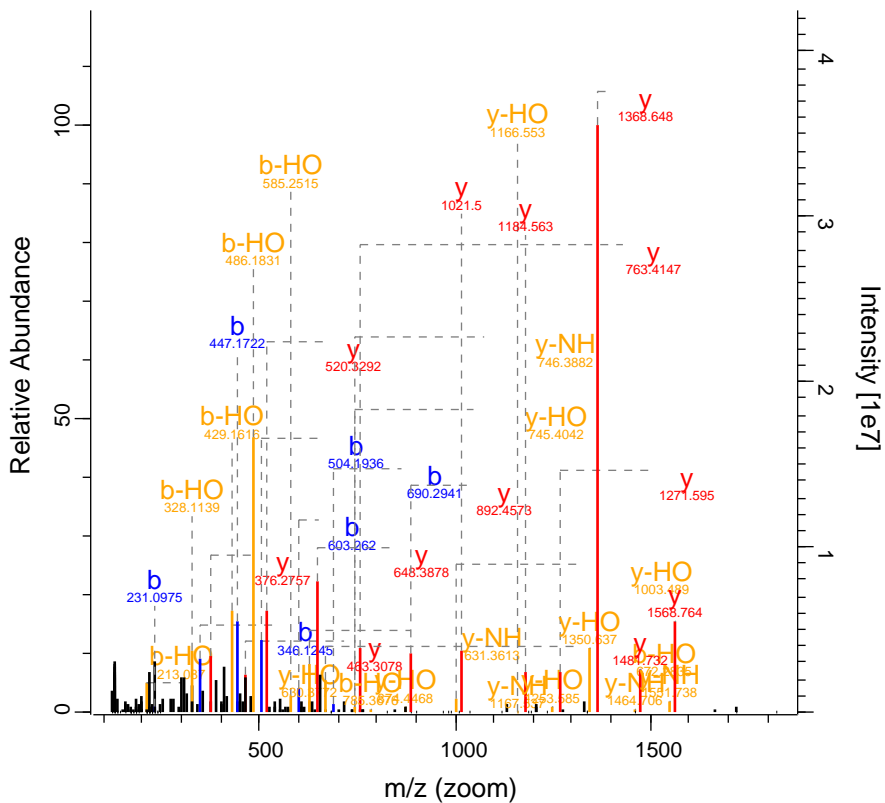

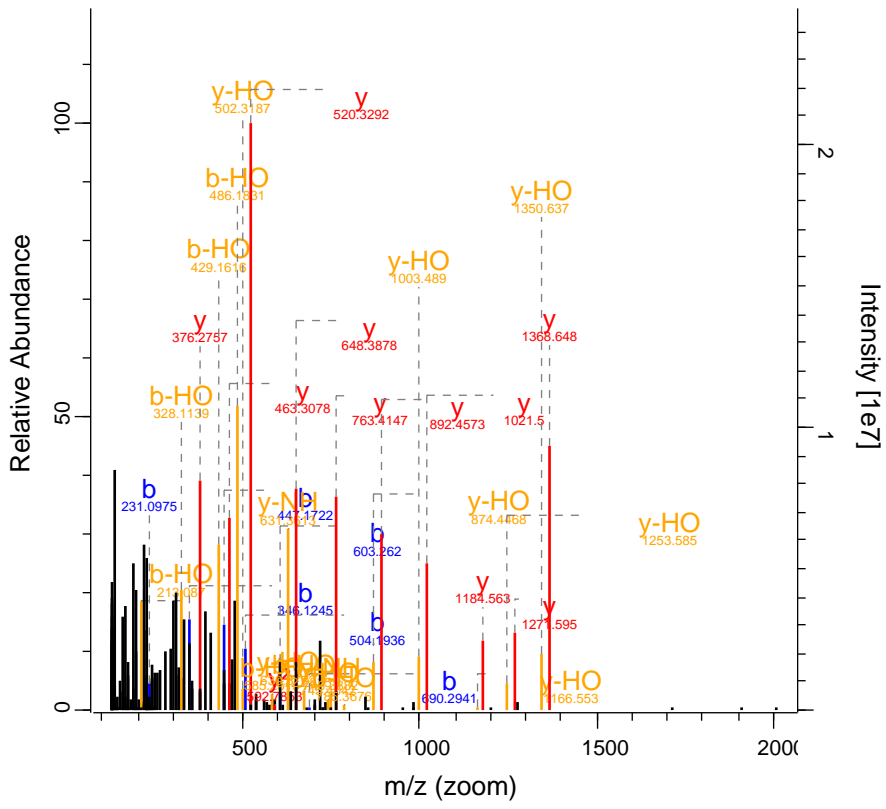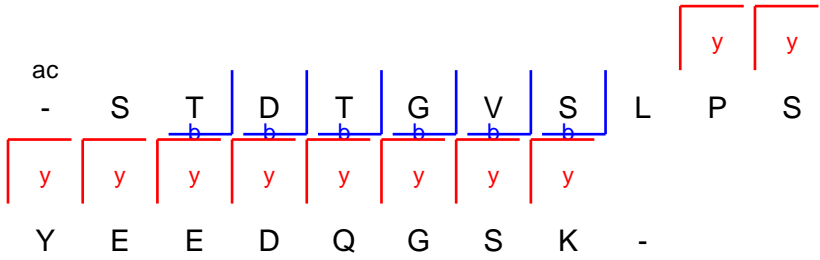

RO-QC-160121\_ZackD\_SS\_Set\_02\_Fractio 20653 FTMS; HC 117.16 551.33 YBEY

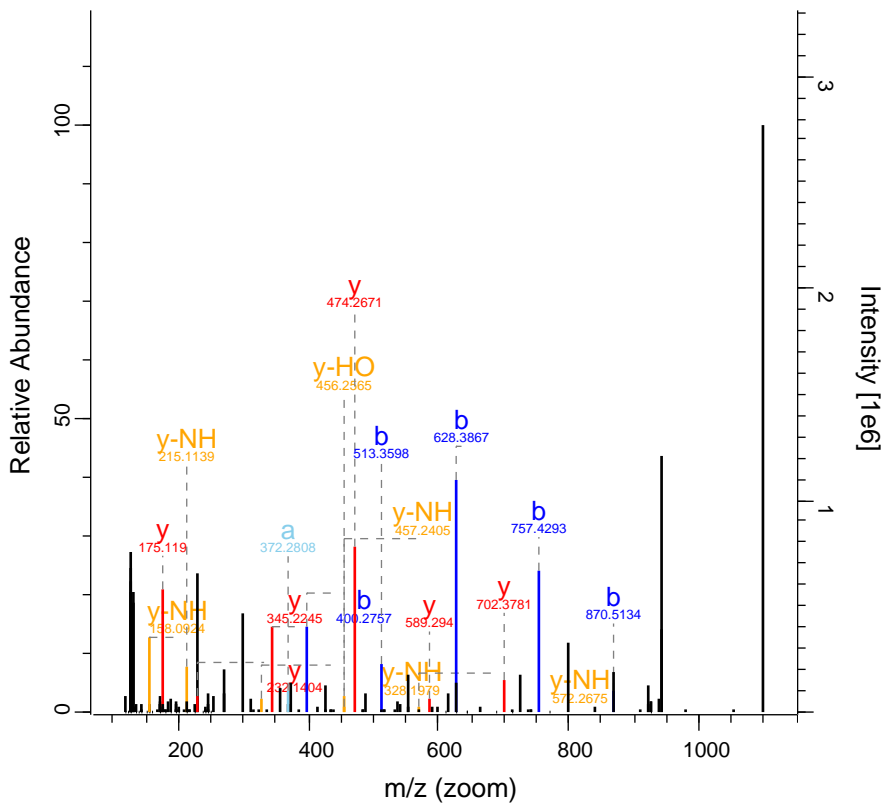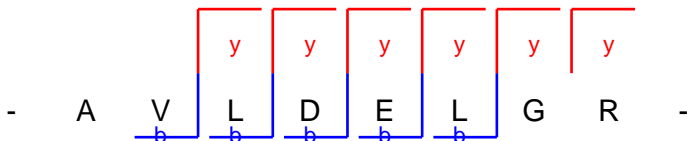



RO-QC-160121\_ZackD\_SS\_Set\_02\_Fraction 20841 FTMS; HC 83.31 551.33 YBEY

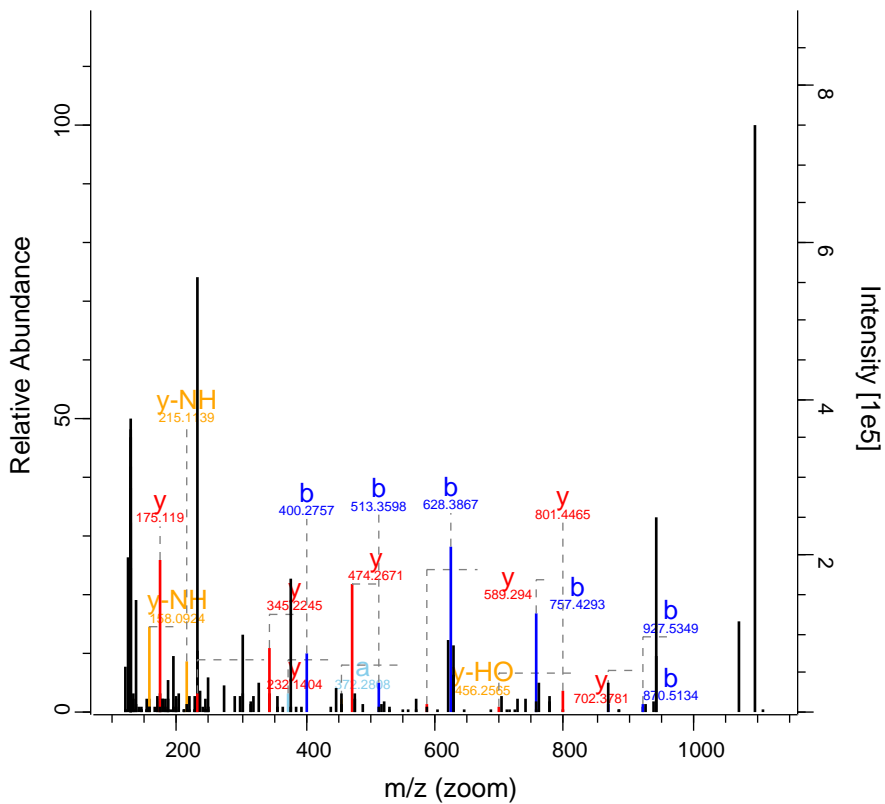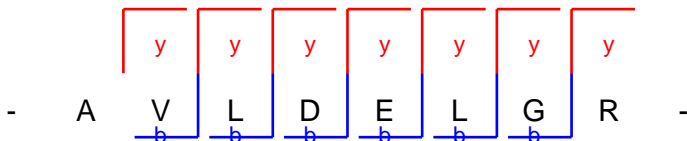



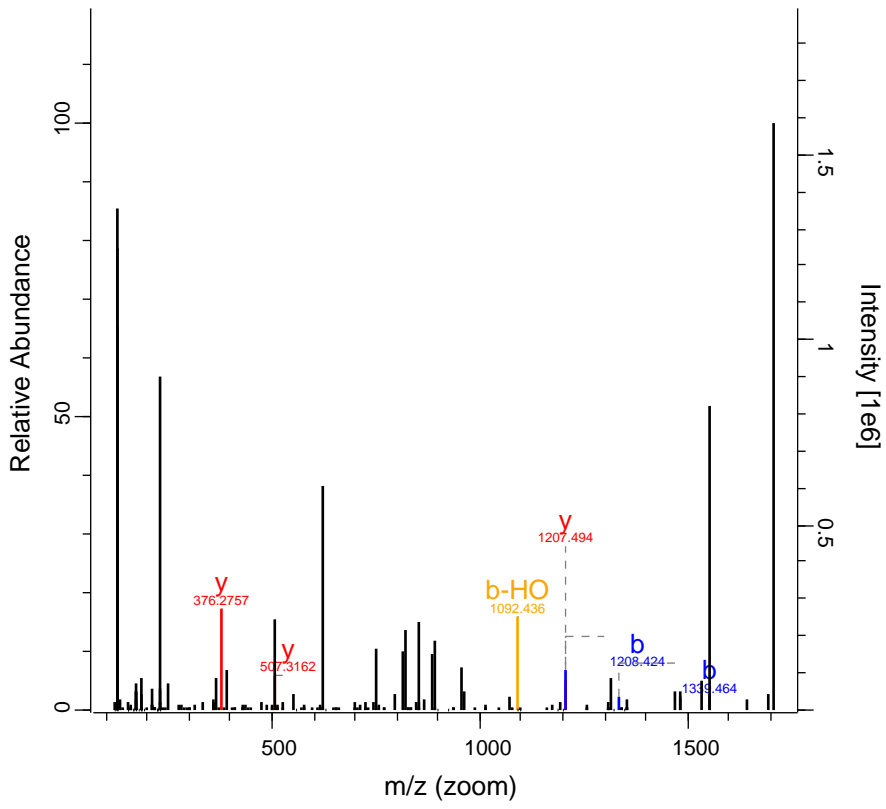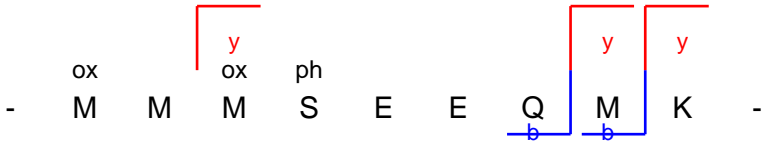



RO-QC-160121\_ZackD\_SS\_Set\_02\_Fraction 21282 FTMS; HC 88.02 989.51 BRI3

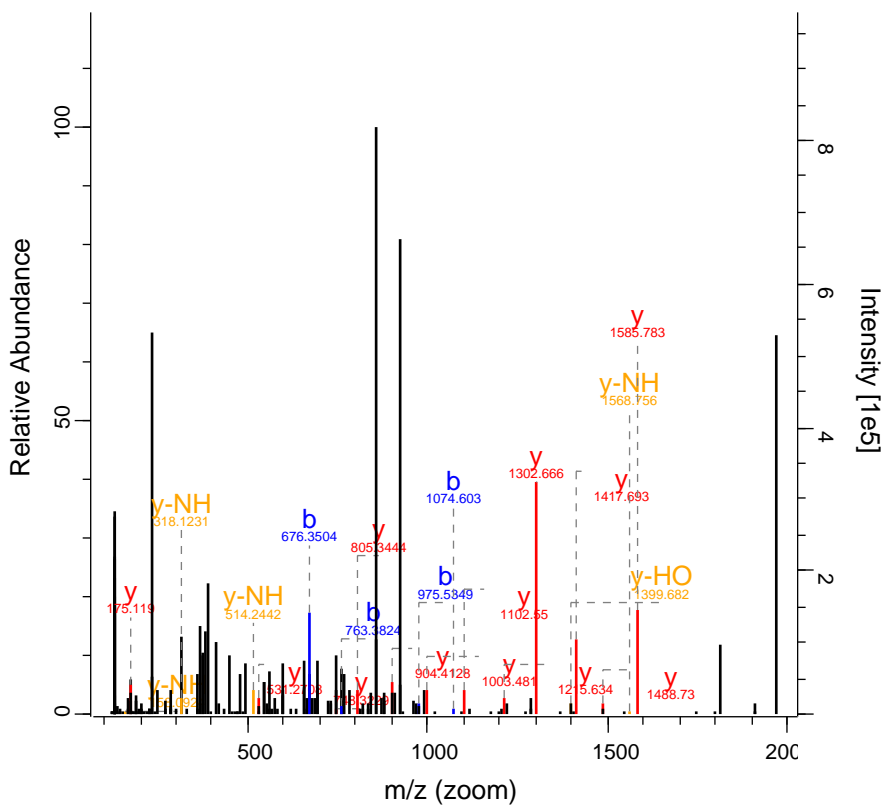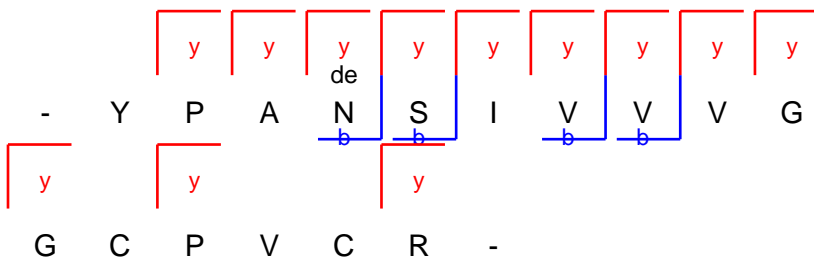

RO-QC-160121\_ZackD\_SS\_Set\_02\_Fractio 21523 FTMS; HC 140.14 989.51 BRI3

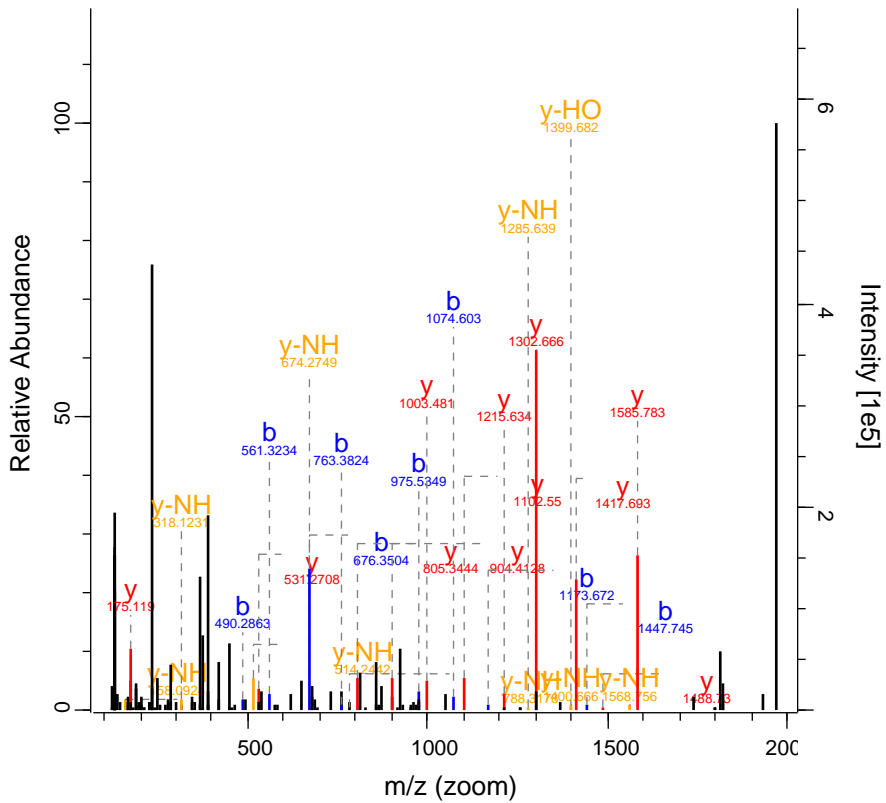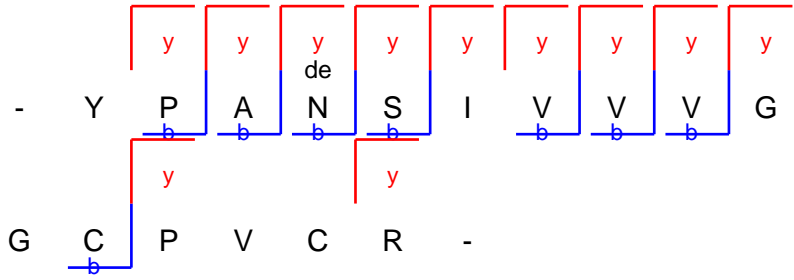

RO-QC-160121\_ZackD\_SS\_Set\_02\_Fraction 21615 FTMS; HC 93.56 803.45 ATXN7L3B

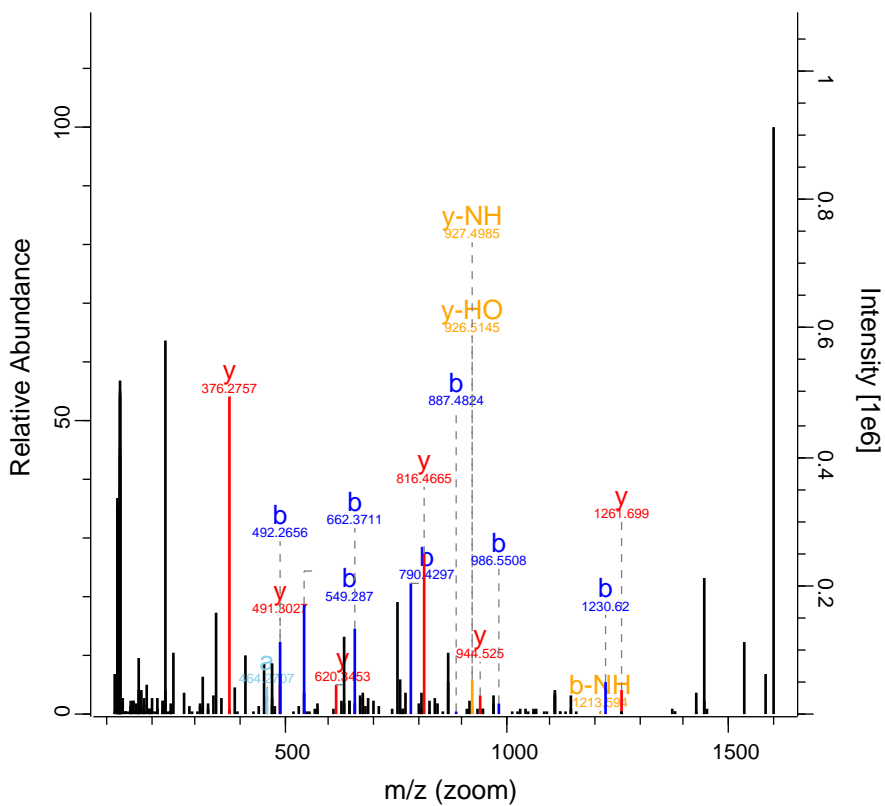

m/z (zoom)

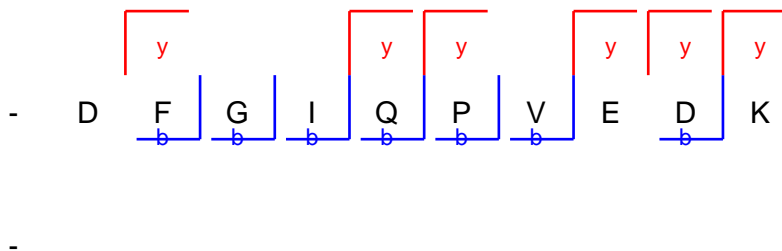

RO-QC-160121\_ZackD\_SS\_Set\_02\_Fractio 21641 FTMS; HC 143.39 641.34 SLC31A1

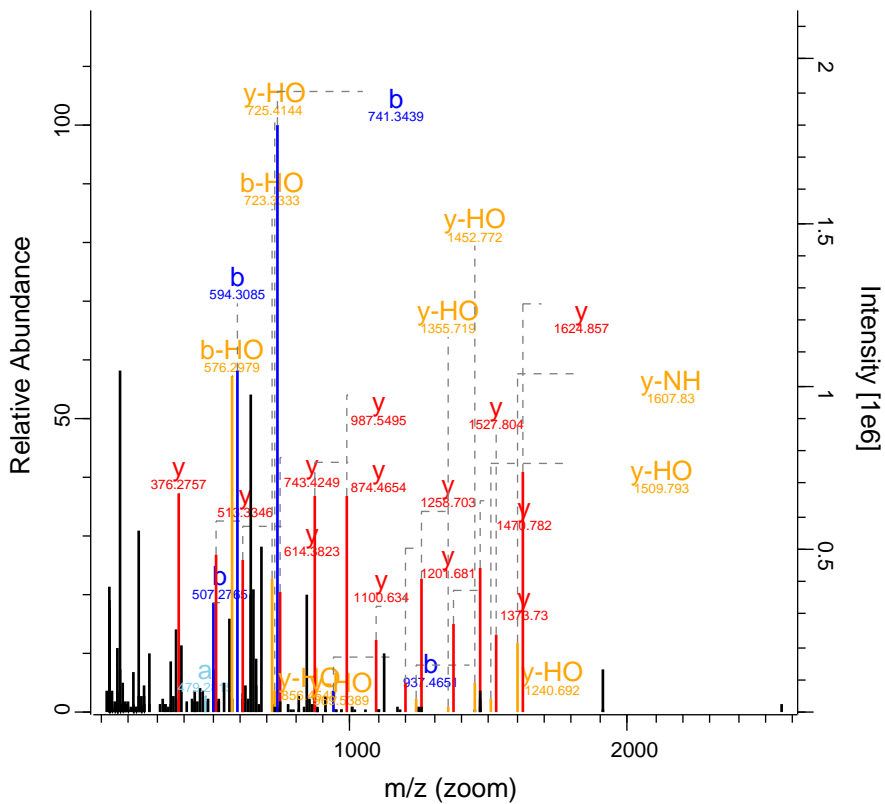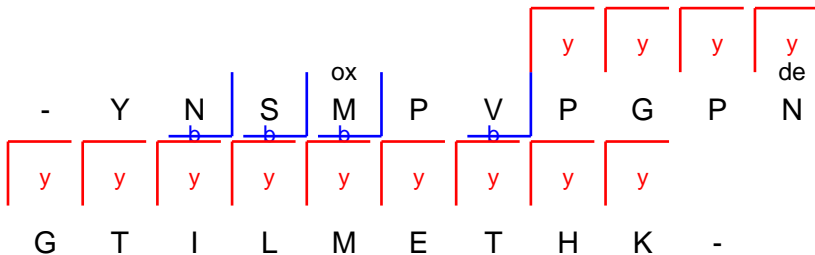



RO-QC-160121\_ZackD\_SS\_Set\_02\_Fraction 22457 FTMS; HC 47.6 721.69 MOGAT2

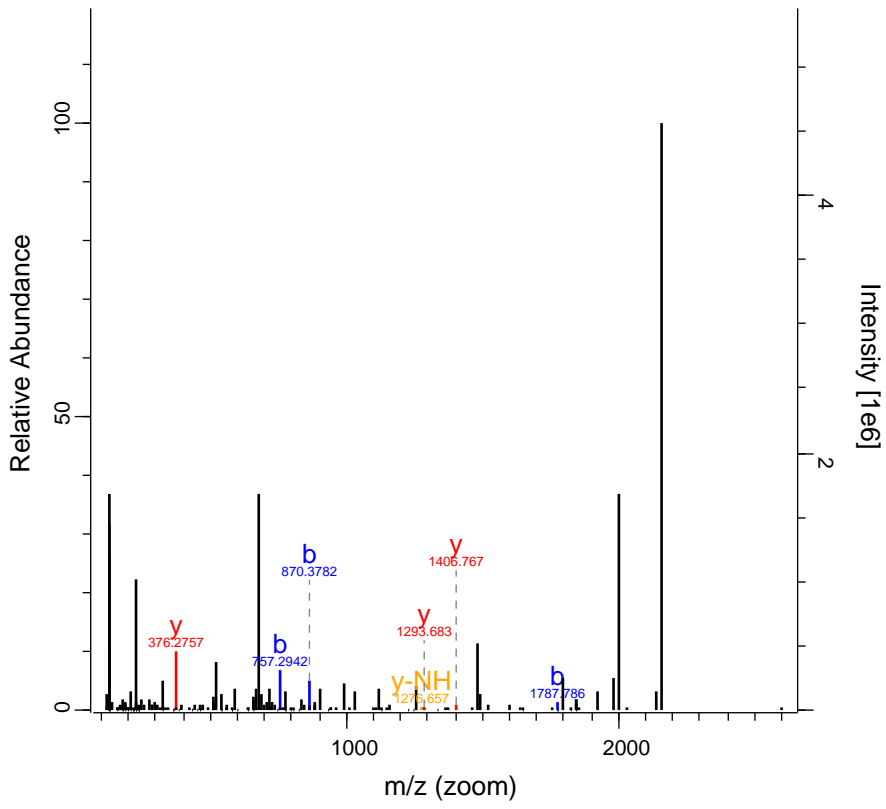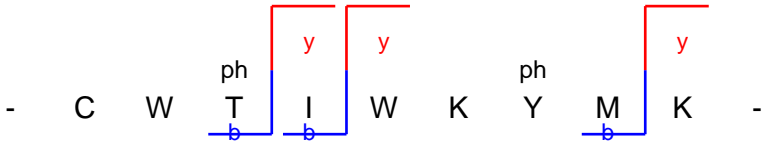

| Raw File                                | Scan  | Method    | Score | m/z    |
|-----------------------------------------|-------|-----------|-------|--------|
| RO-QC-160121_ZackD_SS_Set_02_Fraction_2 | 22491 | FTMS; HCD | 78.94 | 874.99 |

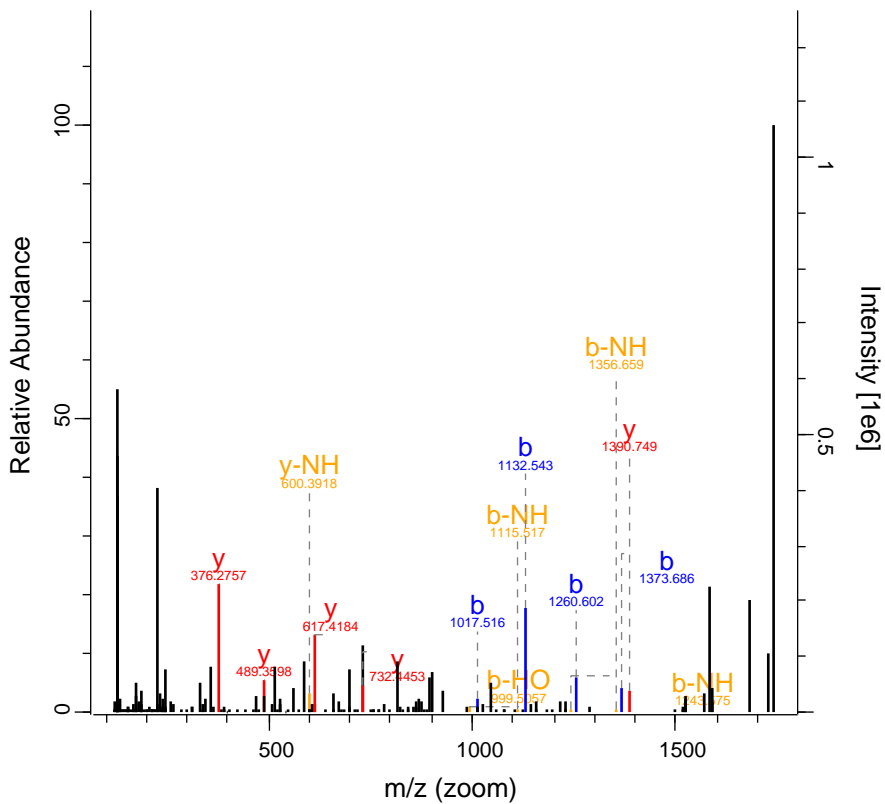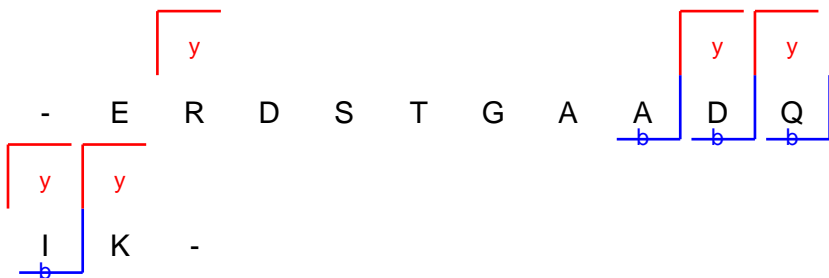

RO-QC-160121\_ZackD\_SS\_Set\_02\_Fraction 22571 FTMS; HC 86.46 799.75 CDC42SE2

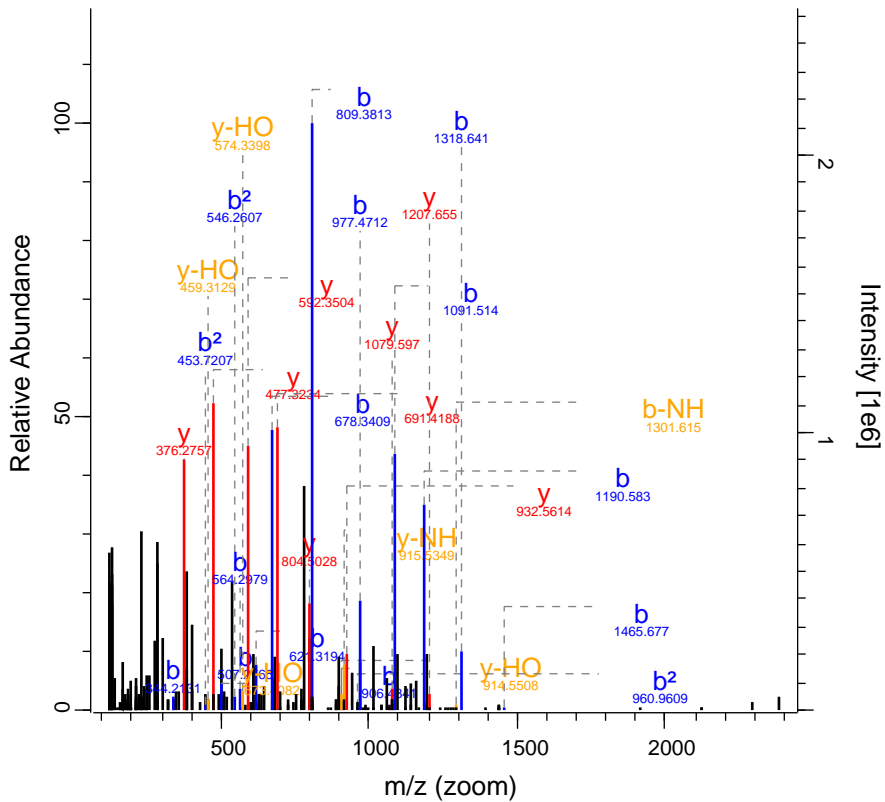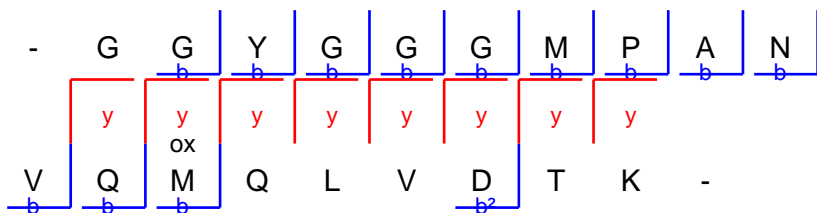

RO-QC-160121\_ZackD\_SS\_Set\_02\_Fraction 23257 FTMS; HC 54.6 511.28 LAMB4

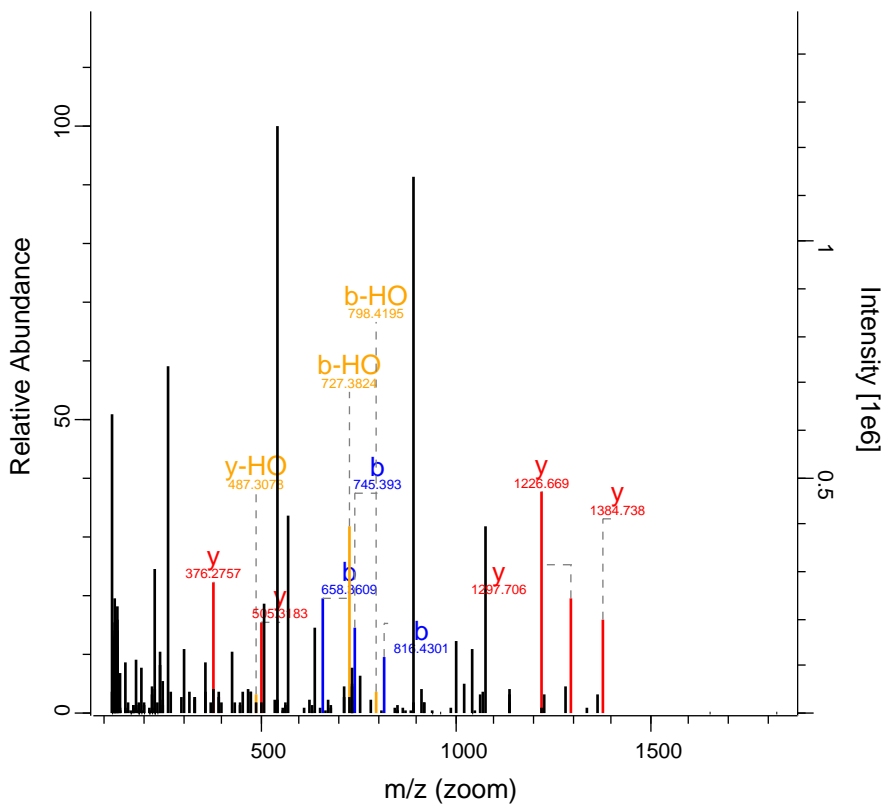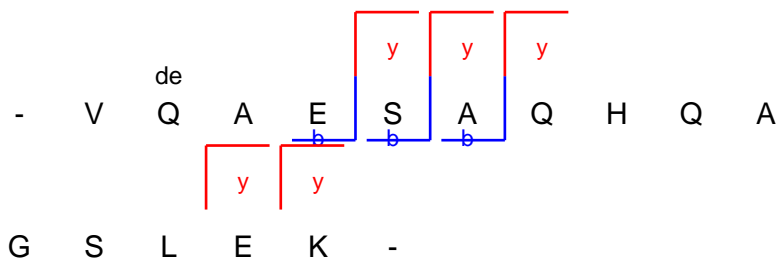

RO-QC-160121\_ZackD\_SS\_Set\_02\_Fractio 23320 FTMS; HC 147.35 756.06 DCAF16

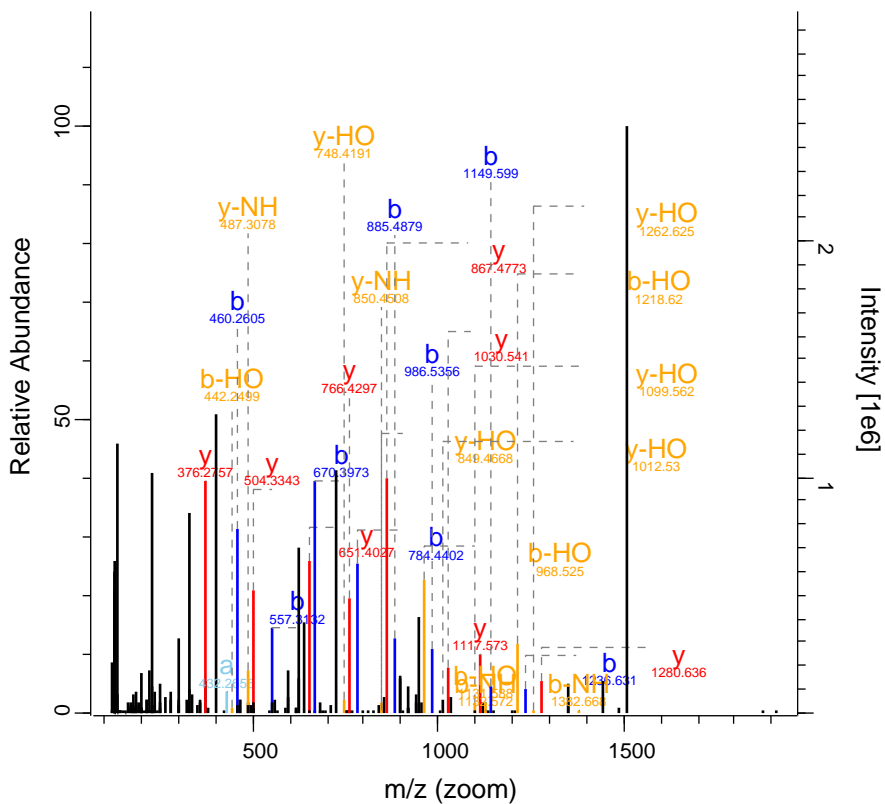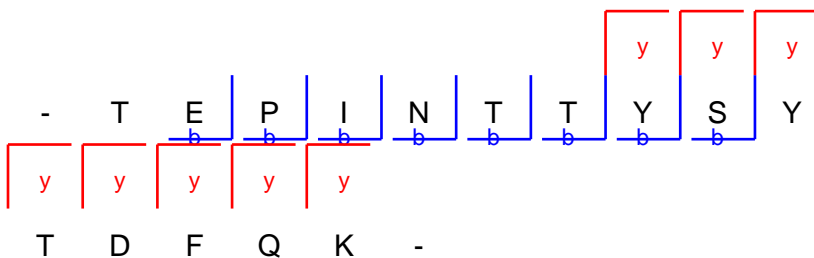

Raw File

Scan Method Score m/z

RO-QC-160121\_ZackD\_SS\_Set\_02\_Fraction\_2

23611 FTMS; HCD 69.6 488.31

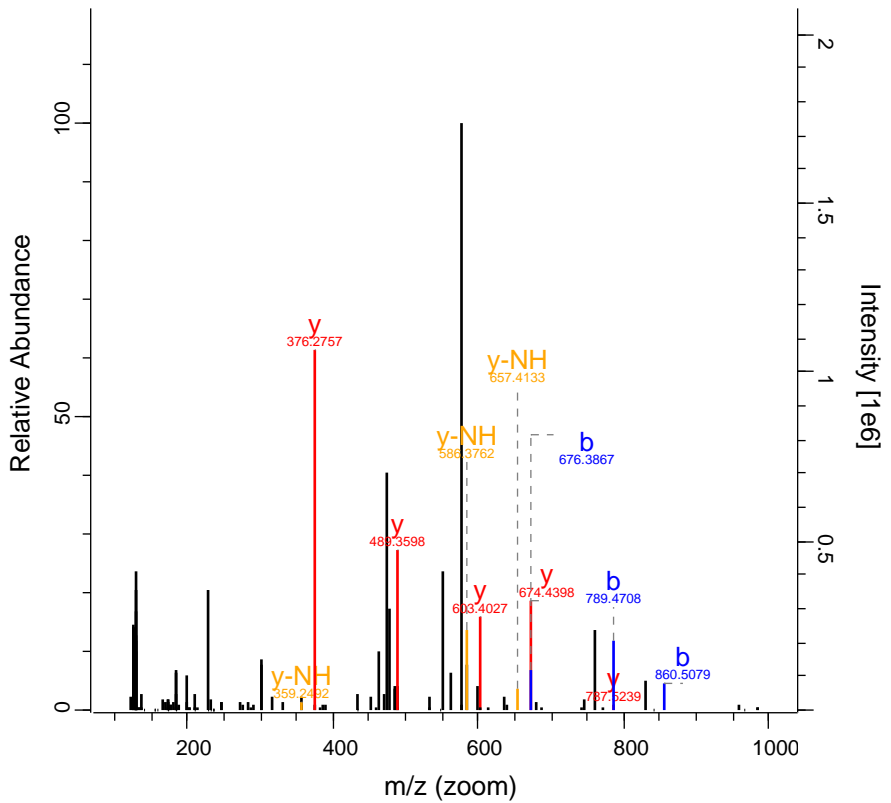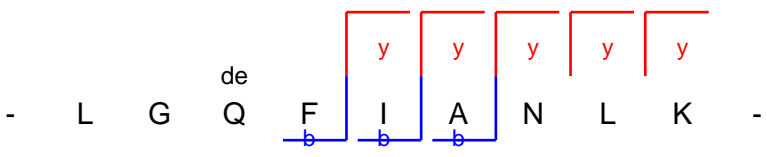

RO-QC-160121\_ZackD\_SS\_Set\_02\_Fraction 24335 FTMS; HC 42.56 554.81 ADAMDEC1

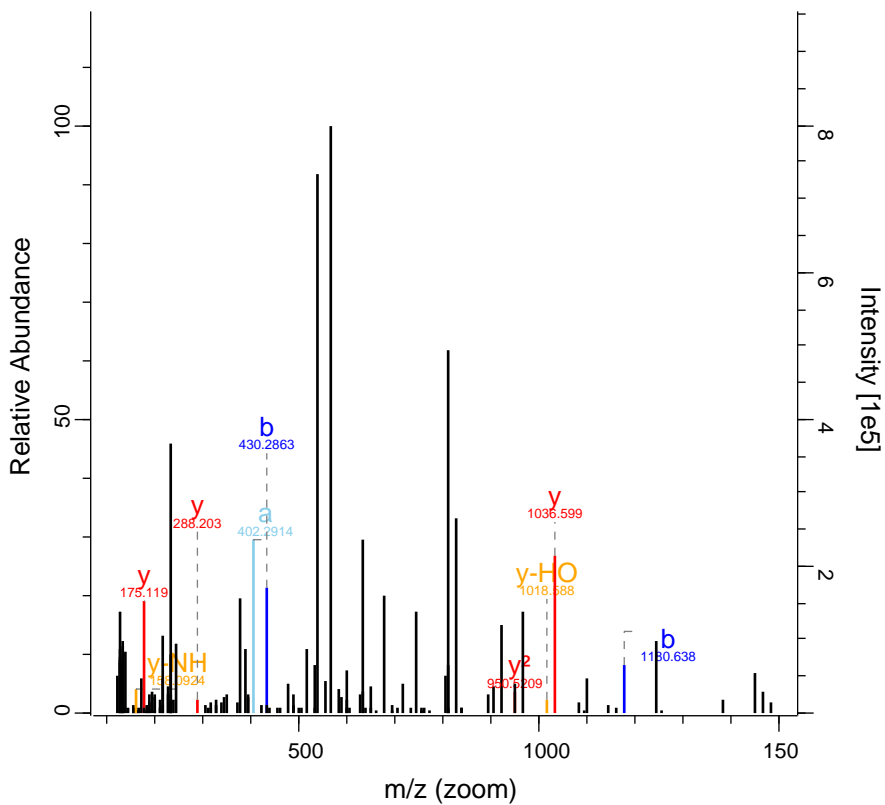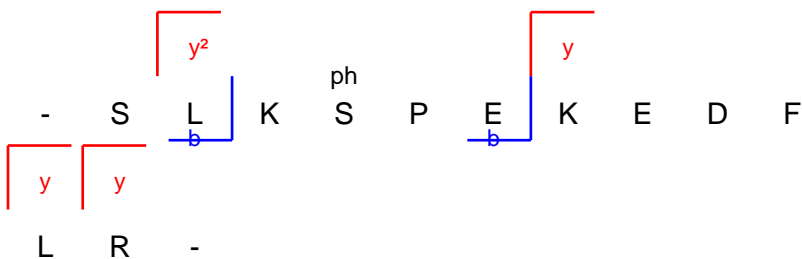

RO-QC-160121\_ZackD\_SS\_Set\_02\_Fraction 24424 FTMS; HC 50.28 940.99 BAI2

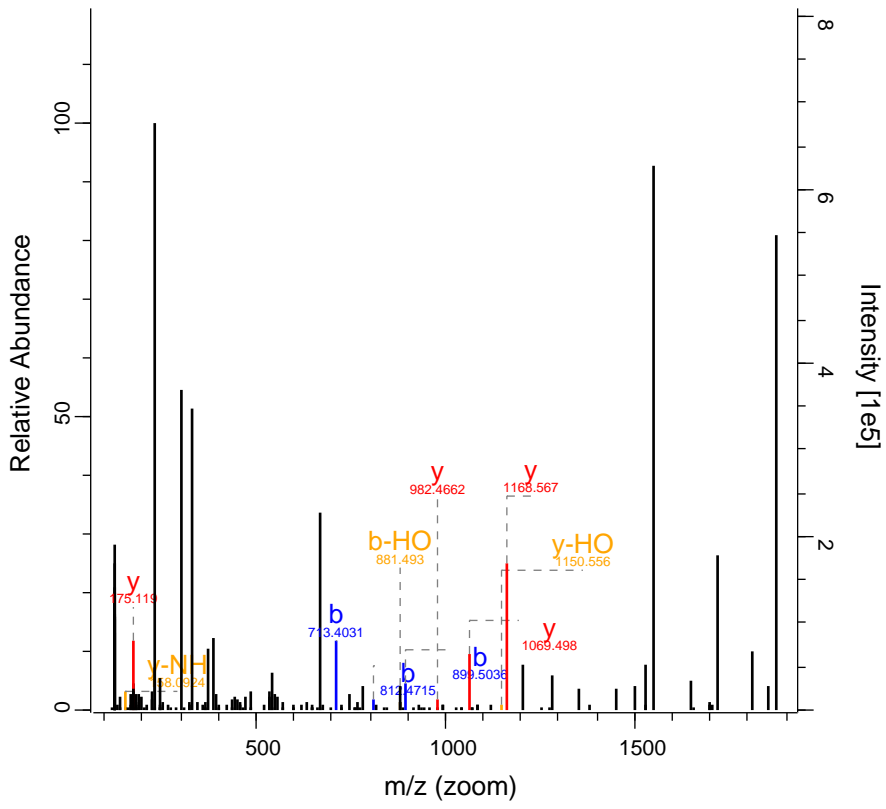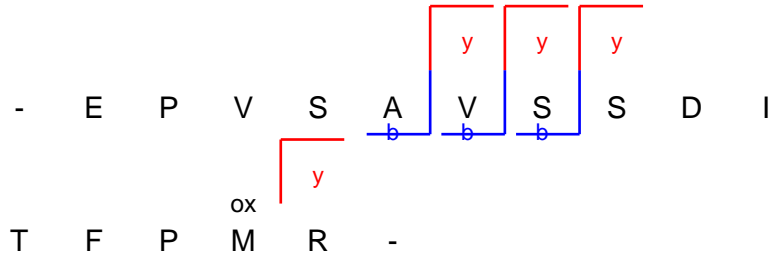





RO-QC-160121\_ZackD\_SS\_Set\_02\_Fractio 25208 FTMS; HC 129.15 849.77 SLC31A1

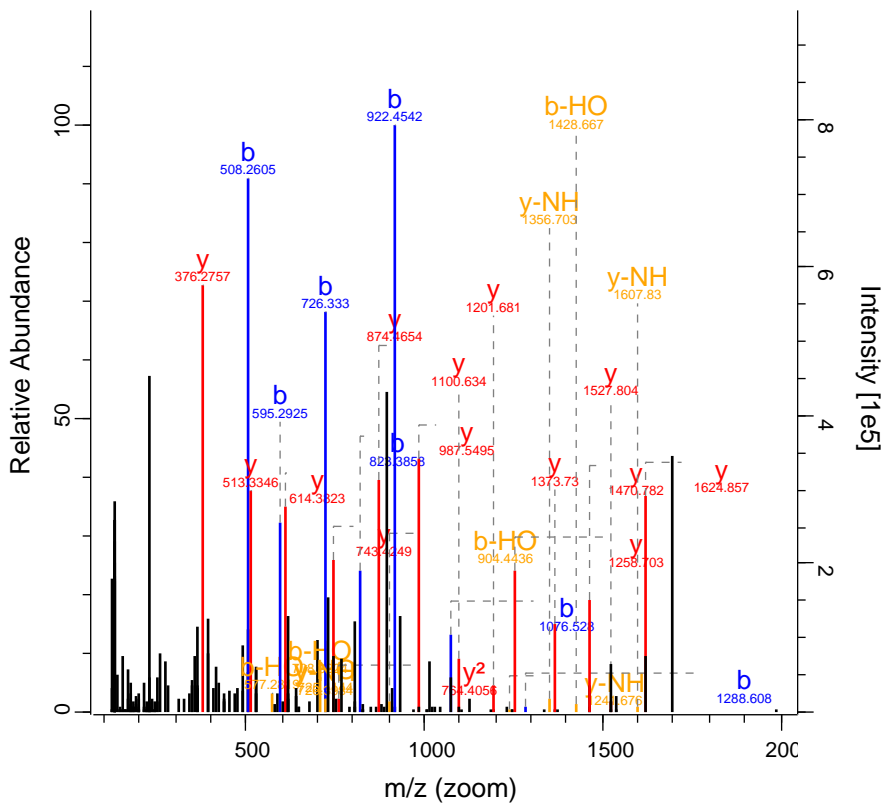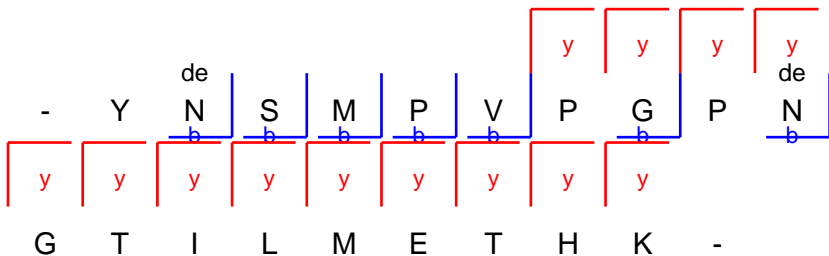

RO-QC-160121\_ZackD\_SS\_Set\_02\_Fractio 25436 FTMS; HC 103.88 683.04 OSBPL7

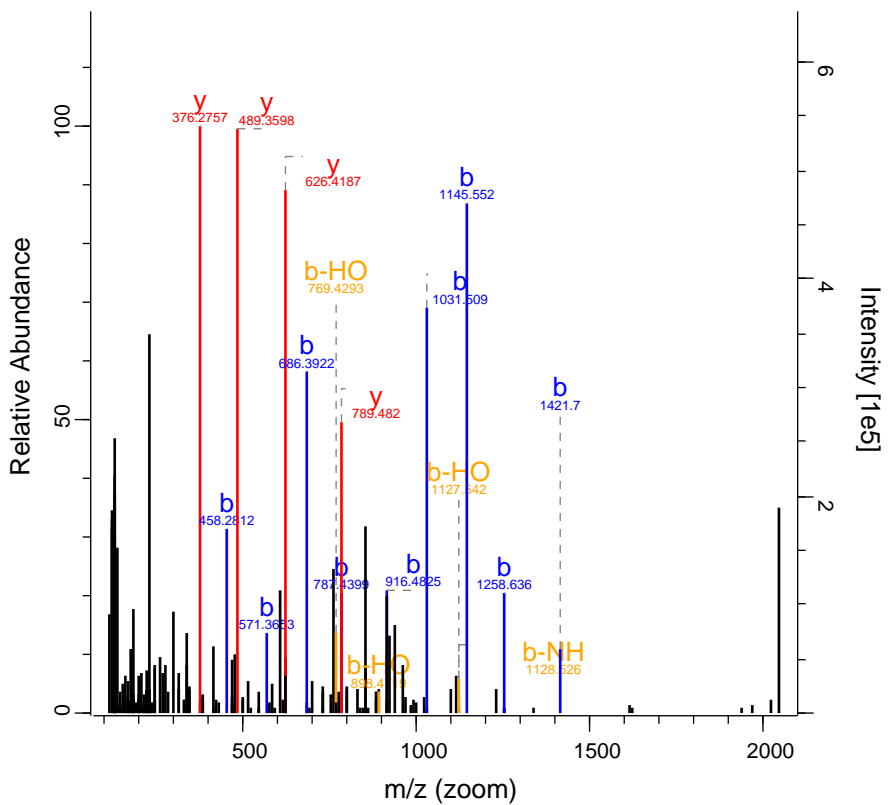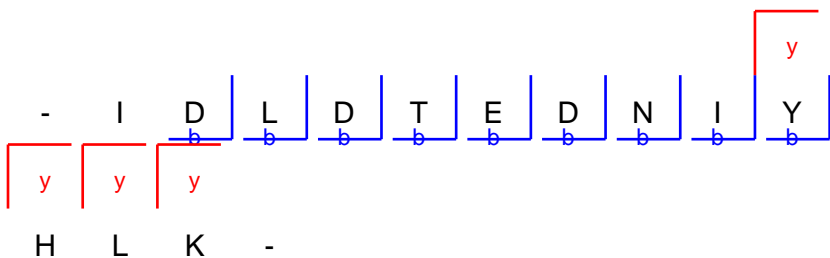



RO-QC-160121\_ZackD\_SS\_Set\_02\_Fractio 25977 FTMS; HC 141.86 849.77 SLC31A1

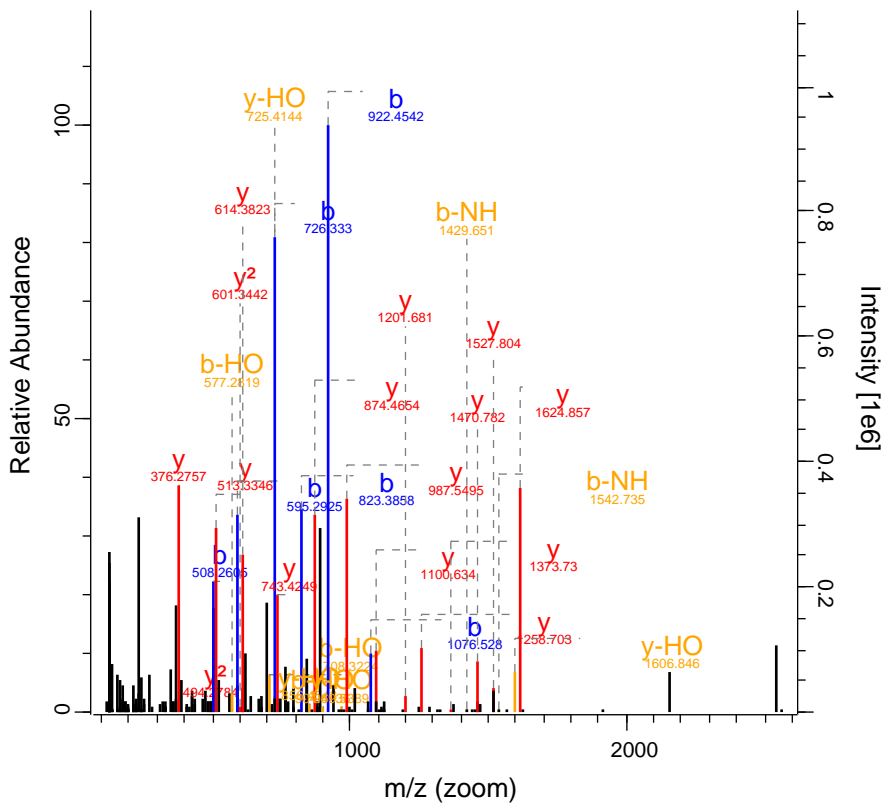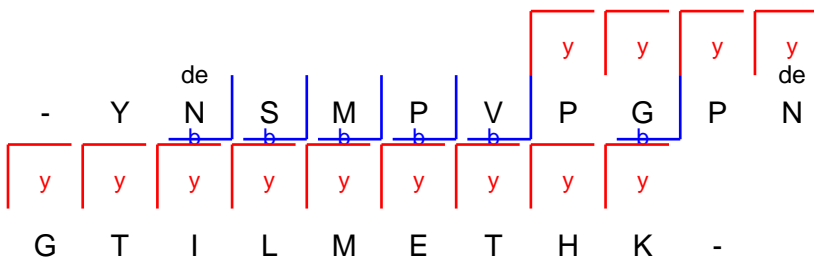

RO-QC-160121\_ZackD\_SS\_Set\_02\_Fraction 26128 FTMS; HC 84.5 849.77 SLC31A1

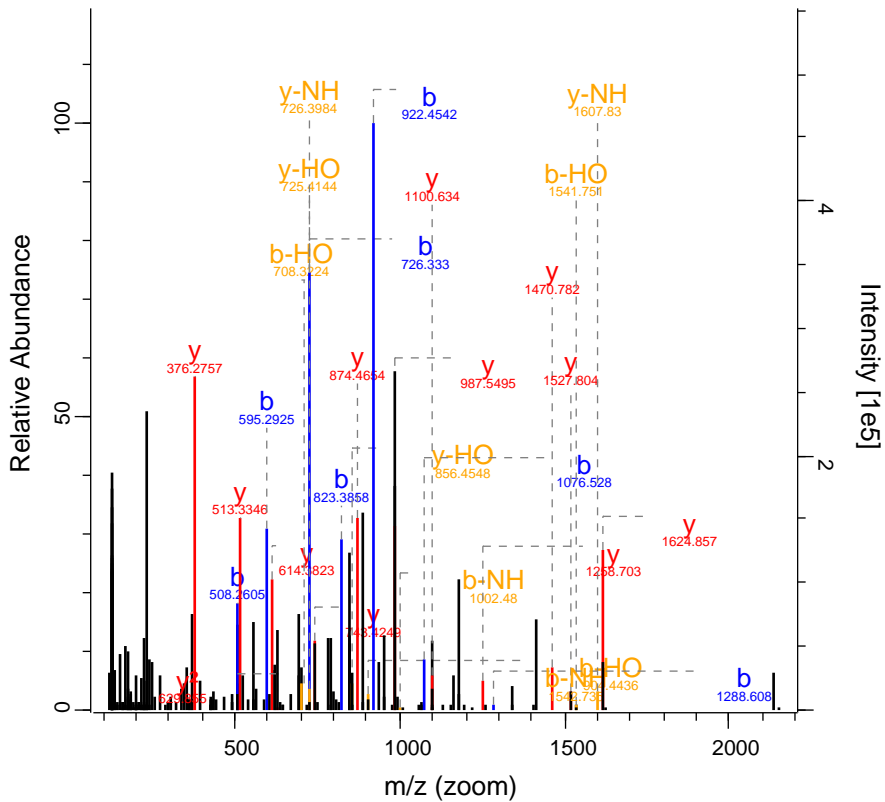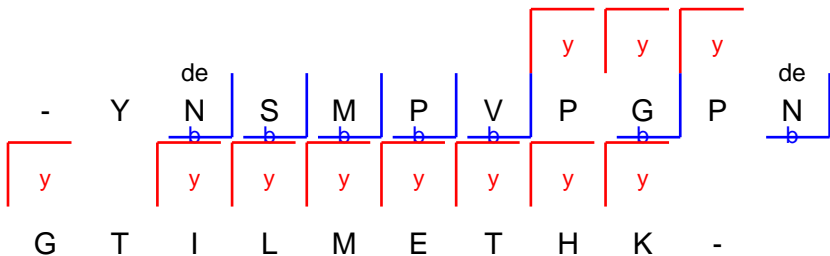

RO-QC-160121\_ZackD\_SS\_Set\_02\_Fractio 26776 FTMS; HC 113.29 778.11 CHRAC1

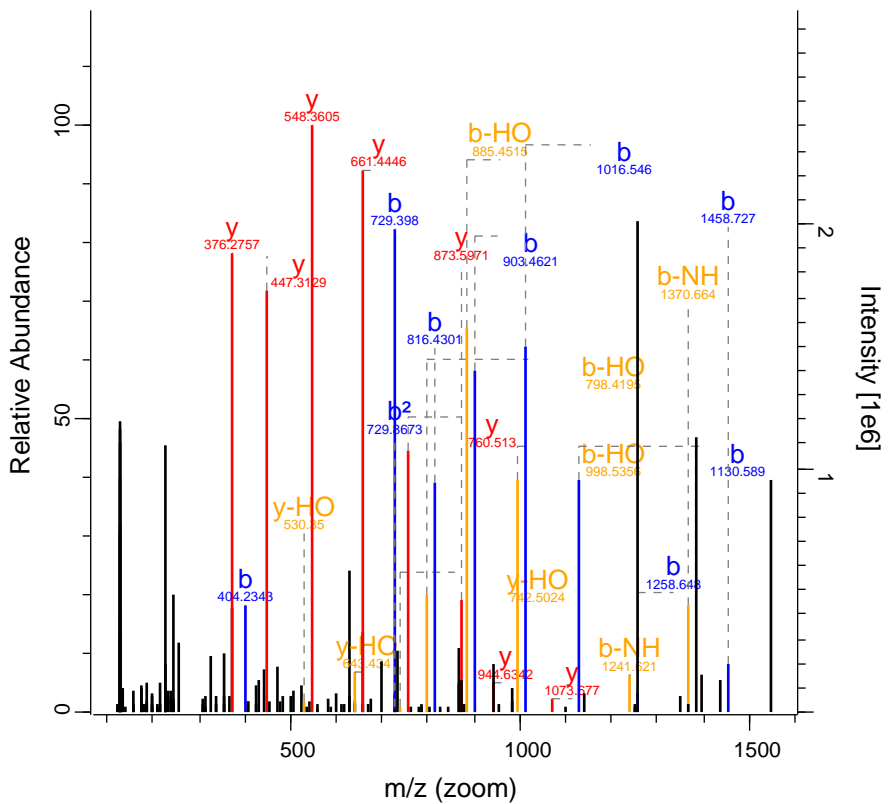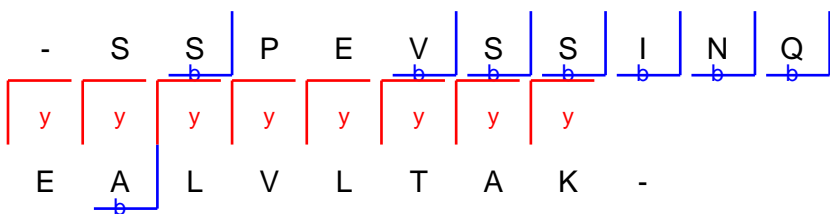

Raw File

Scan Method Score m/z

RO-QC-160121\_ZackD\_SS\_Set\_02\_Fraction\_2

27459 FTMS; HCD 45.33 797.11

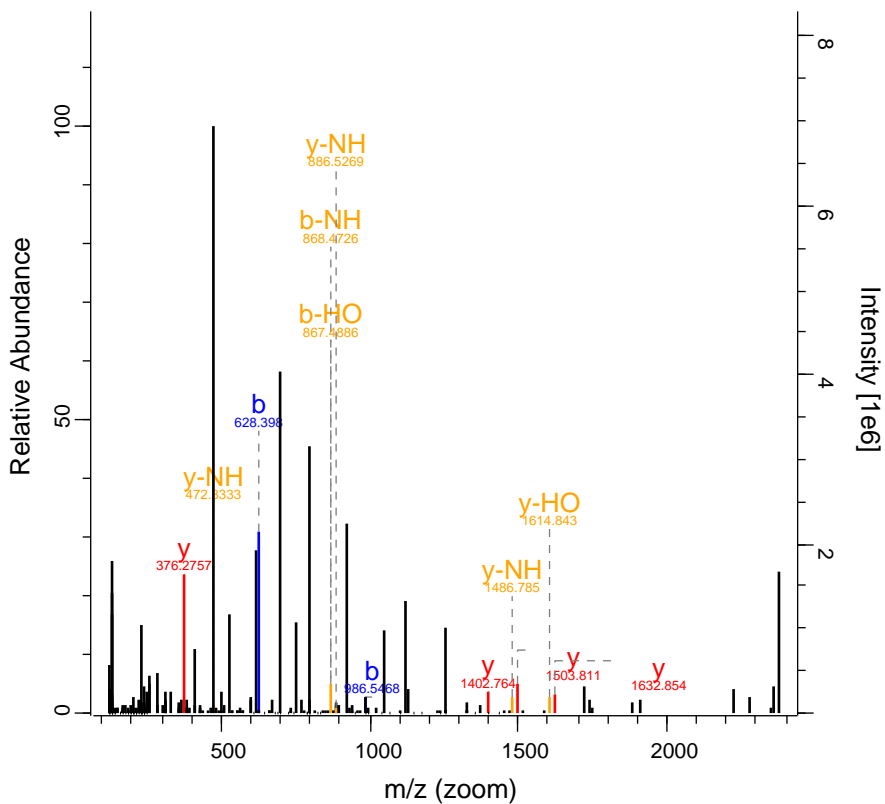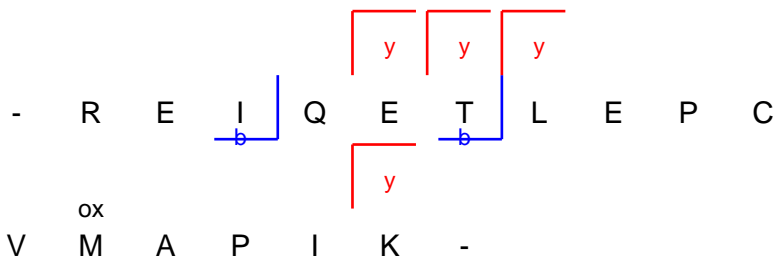



RO-QC-160121\_ZackD\_SS\_Set\_02\_Fraction 27465 FTMS; HC 76.15 924.83 CLMP

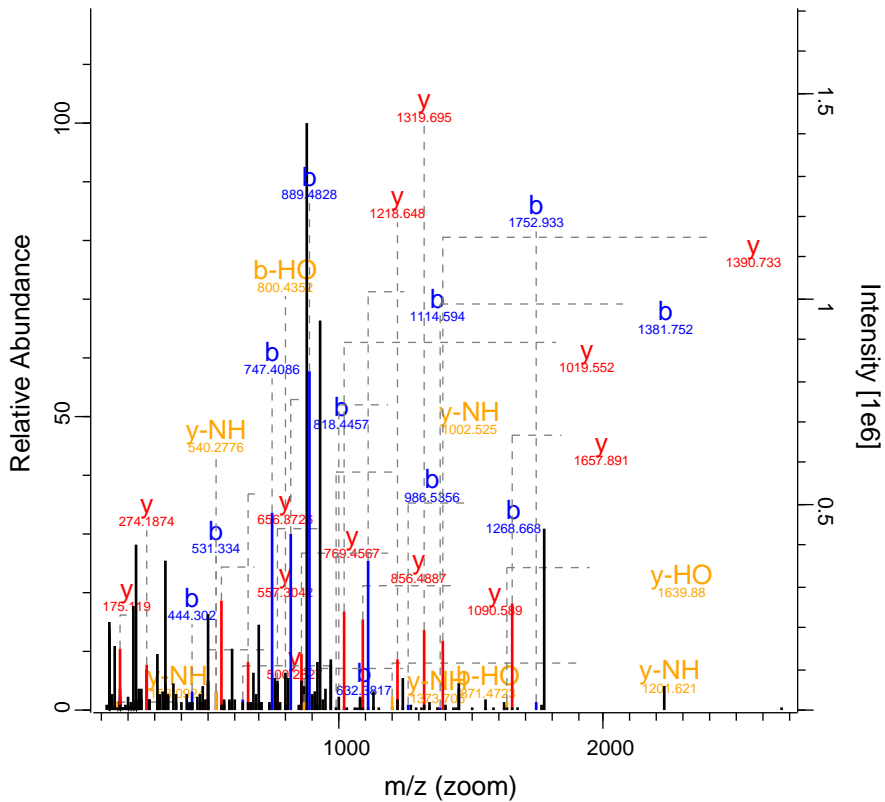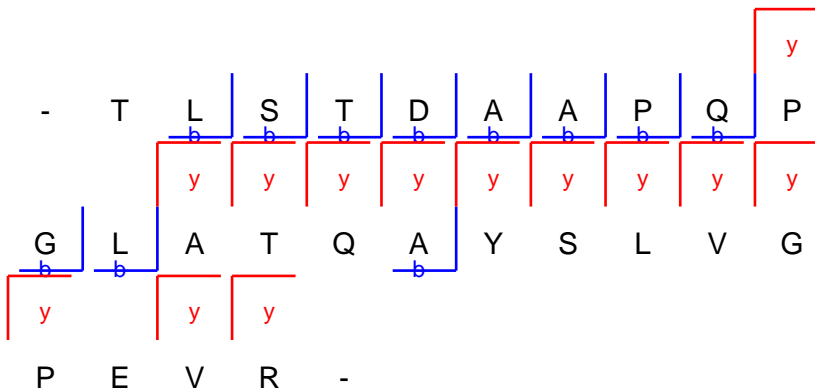

RO-QC-160121\_ZackD\_SS\_Set\_02\_Fractio 27516 FTMS; HC 206.97 826.94 FBXL4

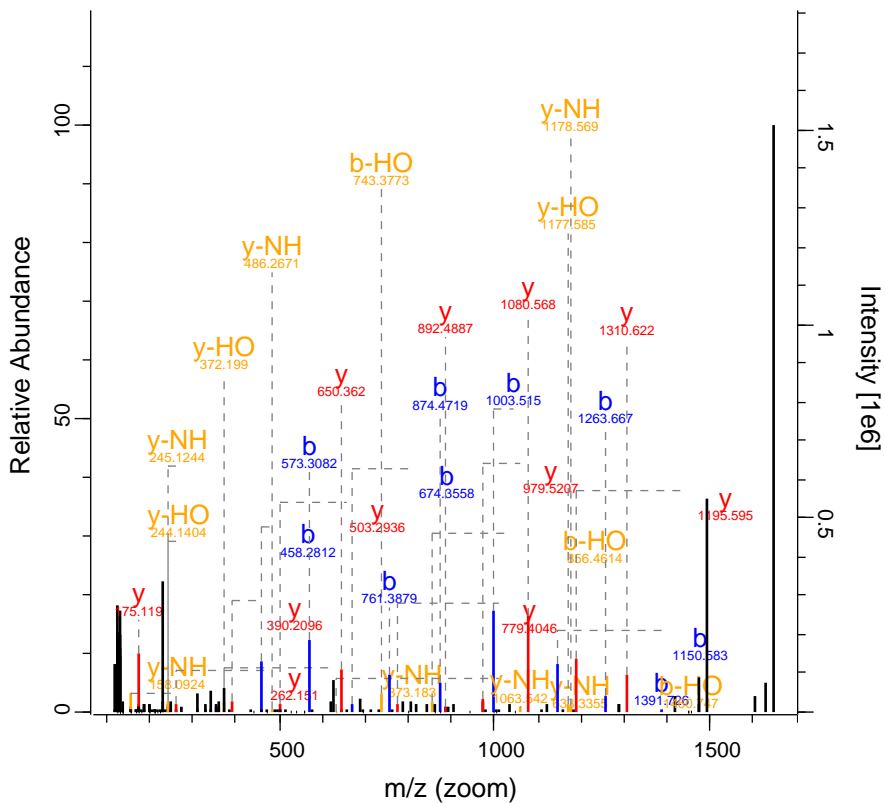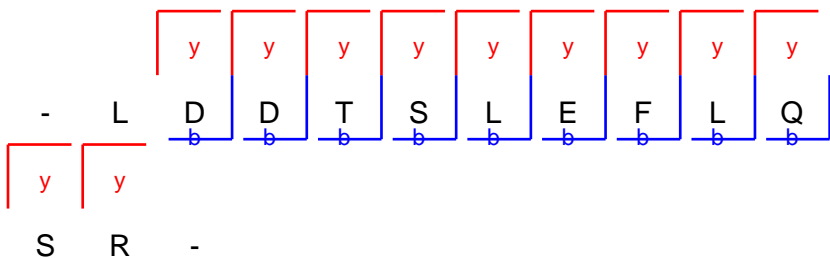

RO-QC-160121\_ZackD\_SS\_Set\_02\_Fraction 27540 FTMS; HC 97.78 551.63 FBXL4

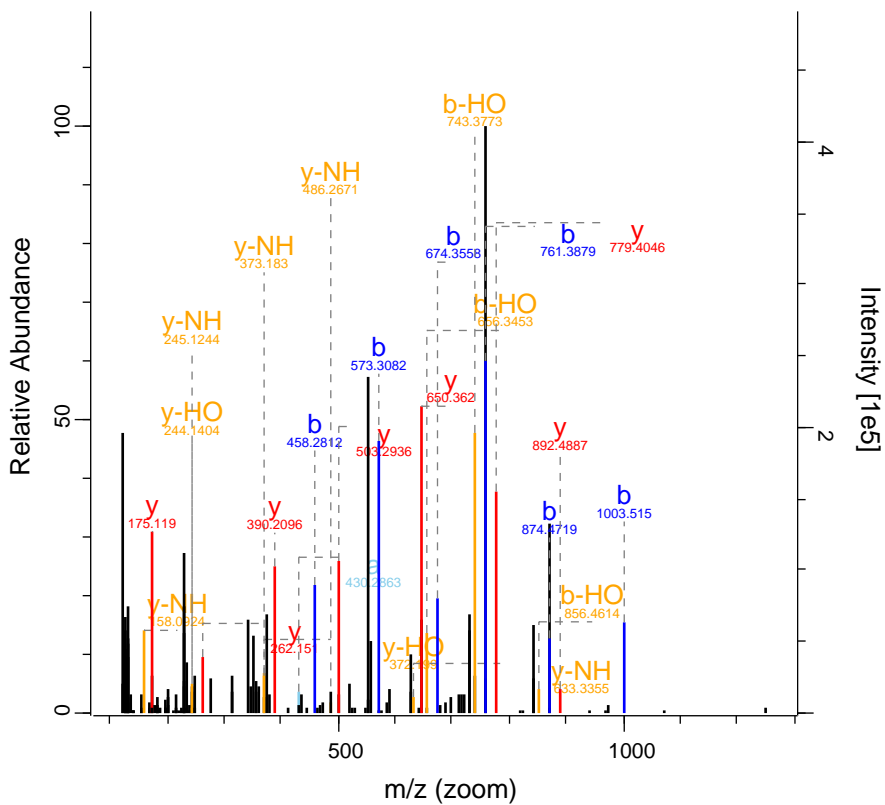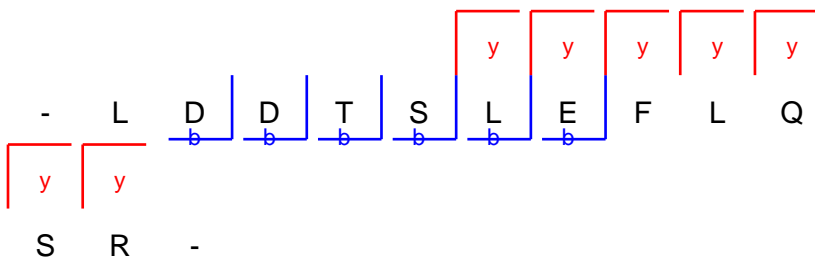

RO-QC-160121\_ZackD\_SS\_Set\_02\_Fraccio 27772 FTMS; HC 128.27 554.33 CYB5R4

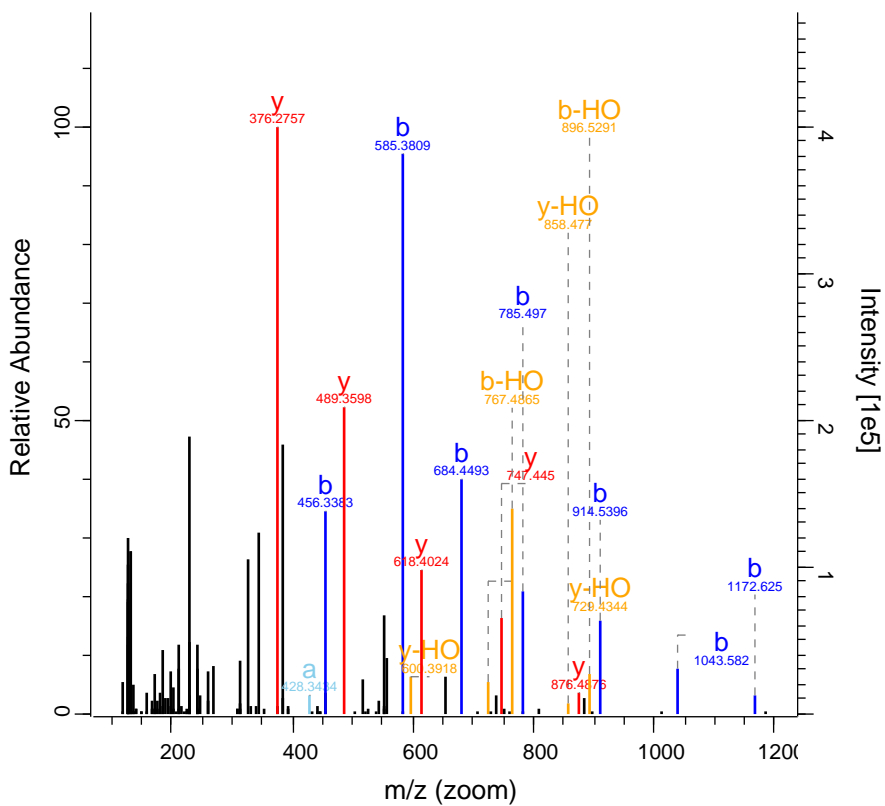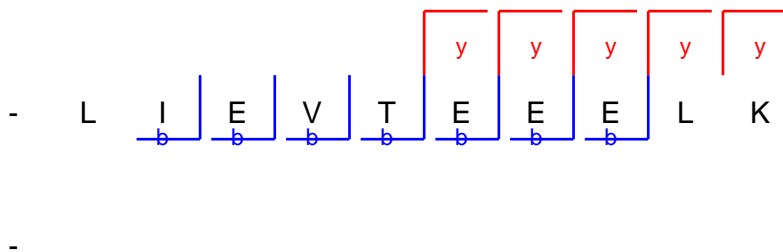

RO-QC-160121\_ZackD\_SS\_Set\_02\_Fractio 27787 FTMS; HC 146.06 897.09 CRTG3

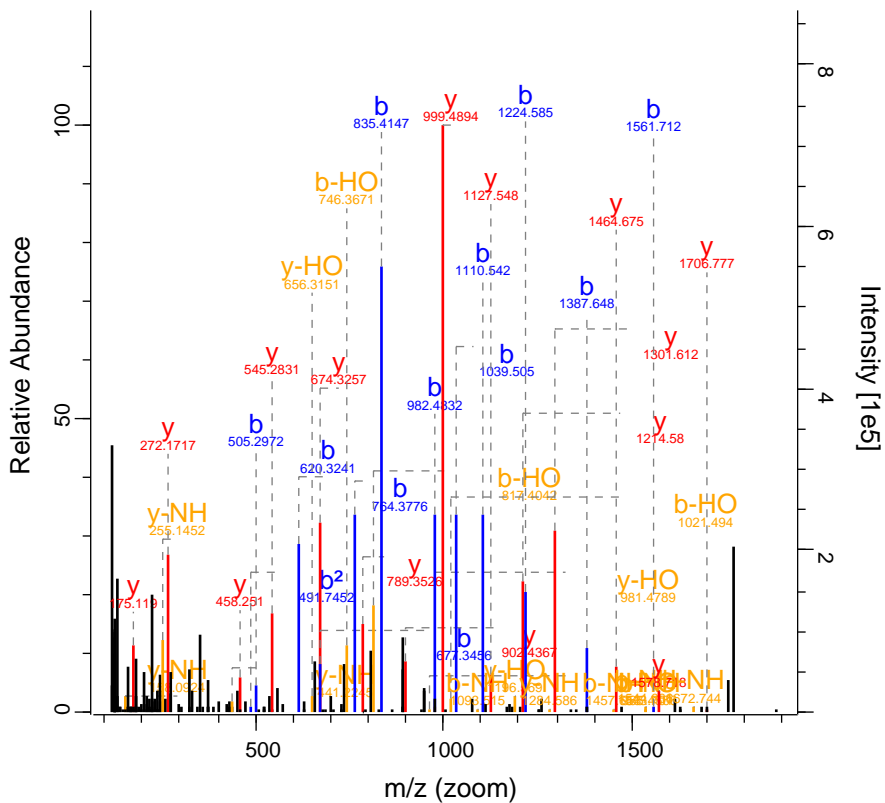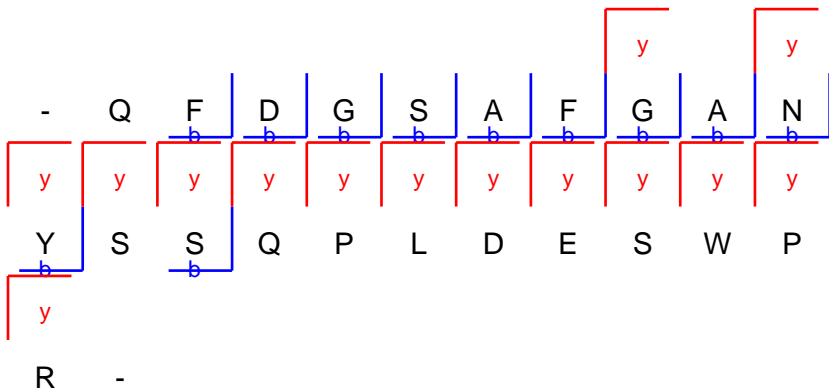

RO-QC-160121\_ZackD\_SS\_Set\_02\_Fraction29331 FTMS; HC 111.4 955.19 MAPKBP1

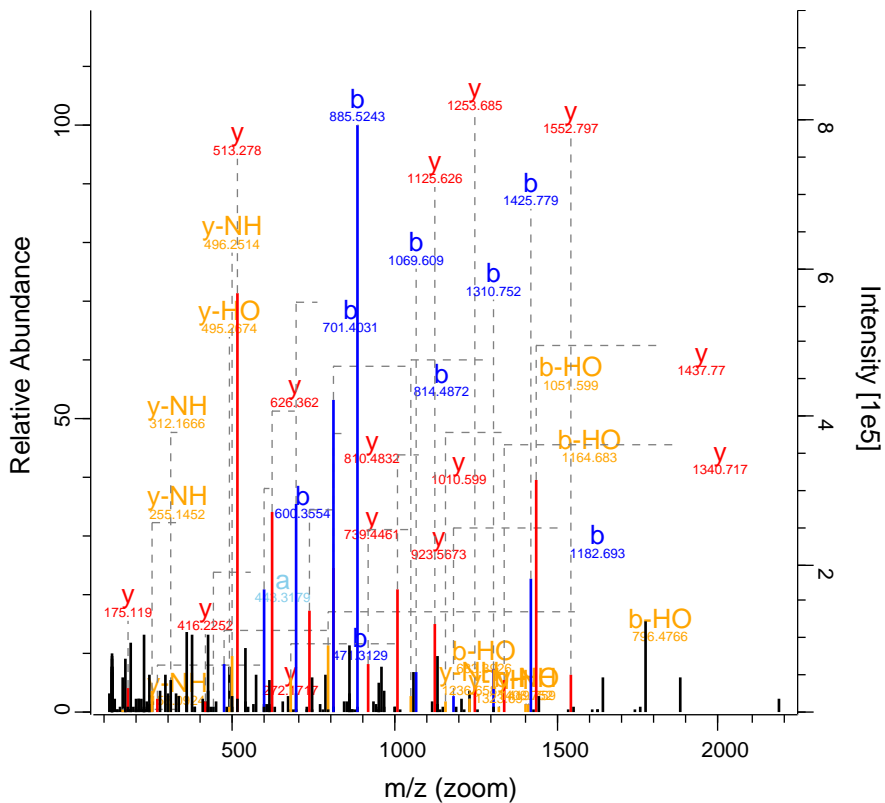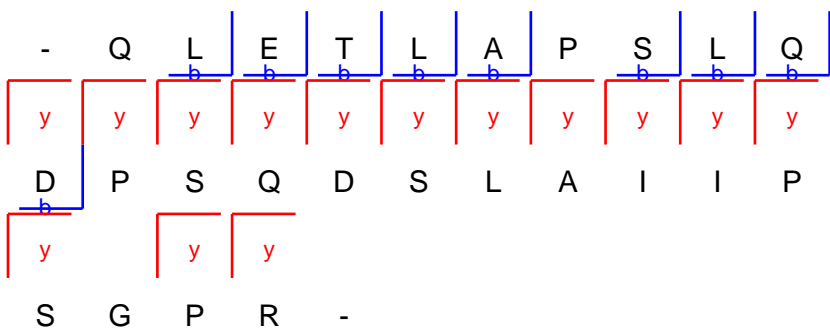

RO-QC-160121\_ZackD\_SS\_Set\_02\_Fraction 29487 FTMS; HC 86.62 852.49 ESRRA

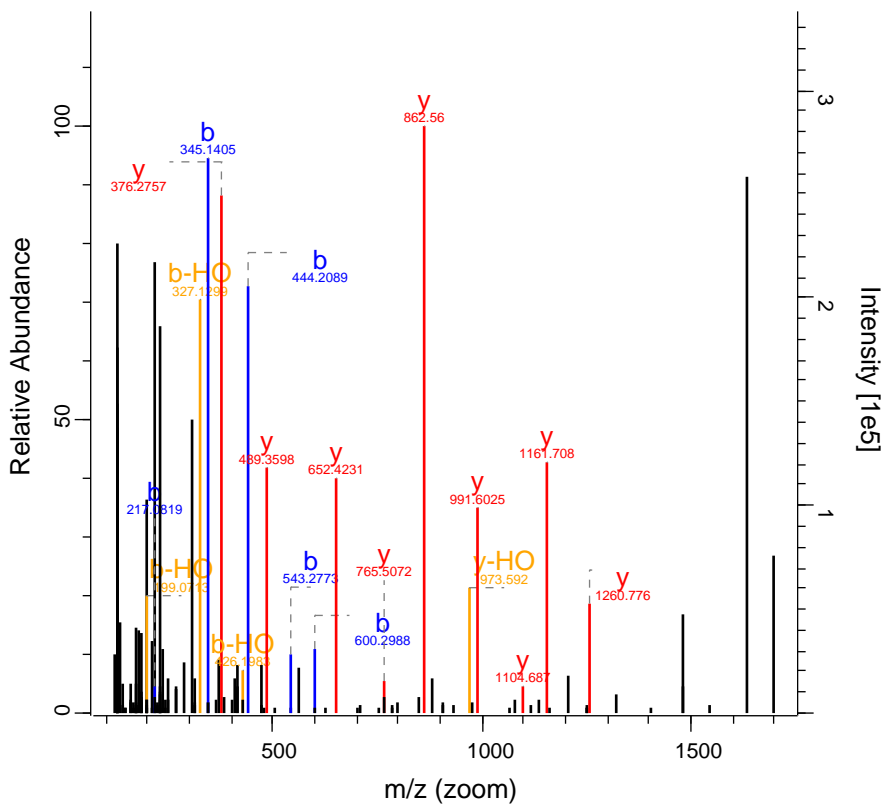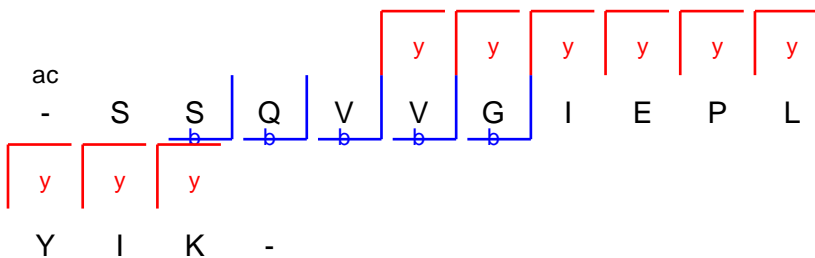

RO-QC-160121\_ZackD\_SS\_Set\_02\_Fractio 30132 FTMS; HC 170.06 811.12 ANGEL1

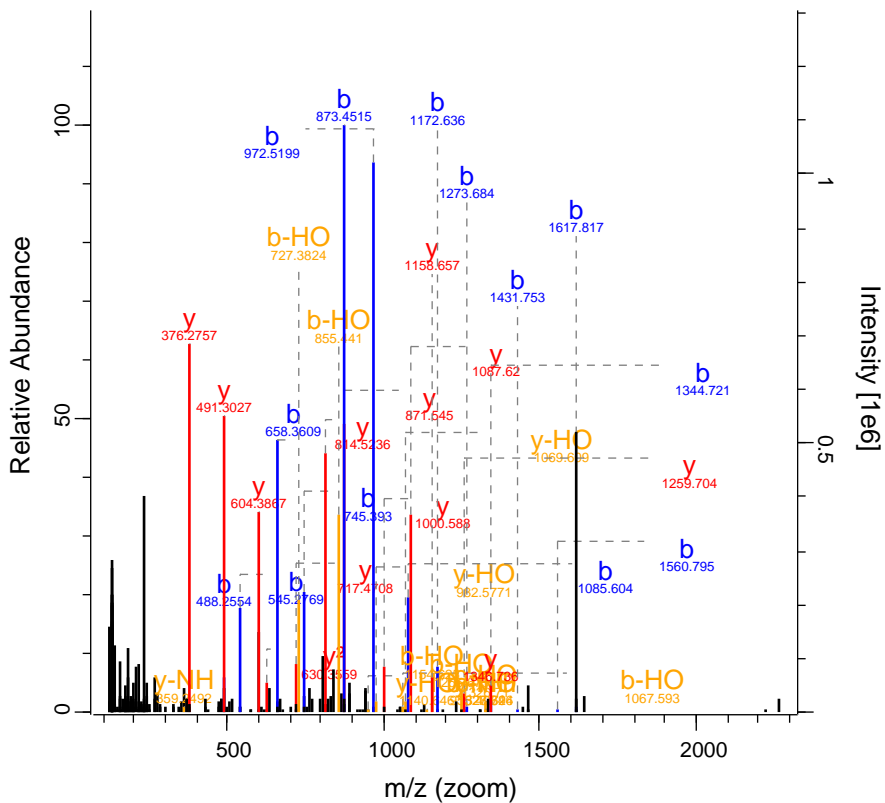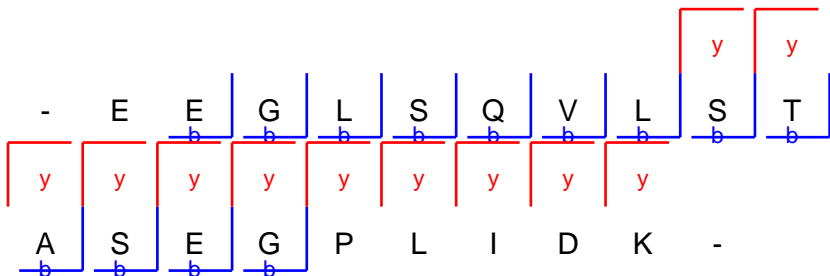



RO-QC-160121\_ZackD\_SS\_Set\_02\_Fractio 30571 FTMS; HC 122.93 761.06 E4F1

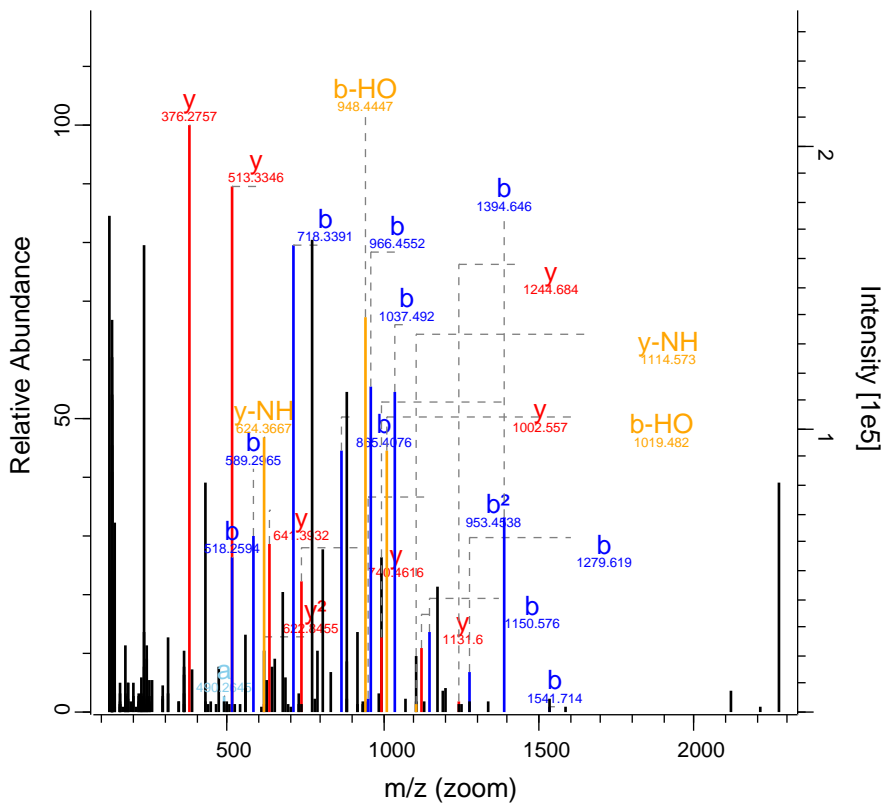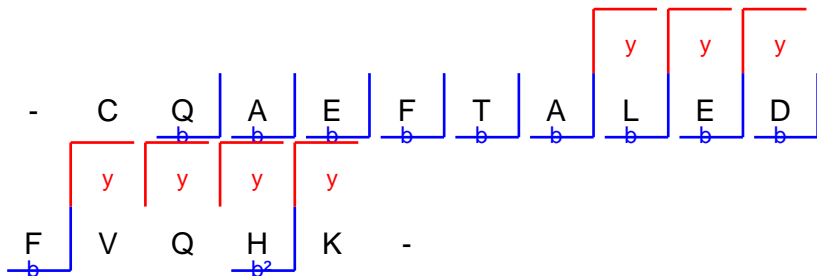

RO-QC-160121\_ZackD\_SS\_Set\_02\_Fraction1 31317 FTMS; HCl 170.53 999.2 LUM

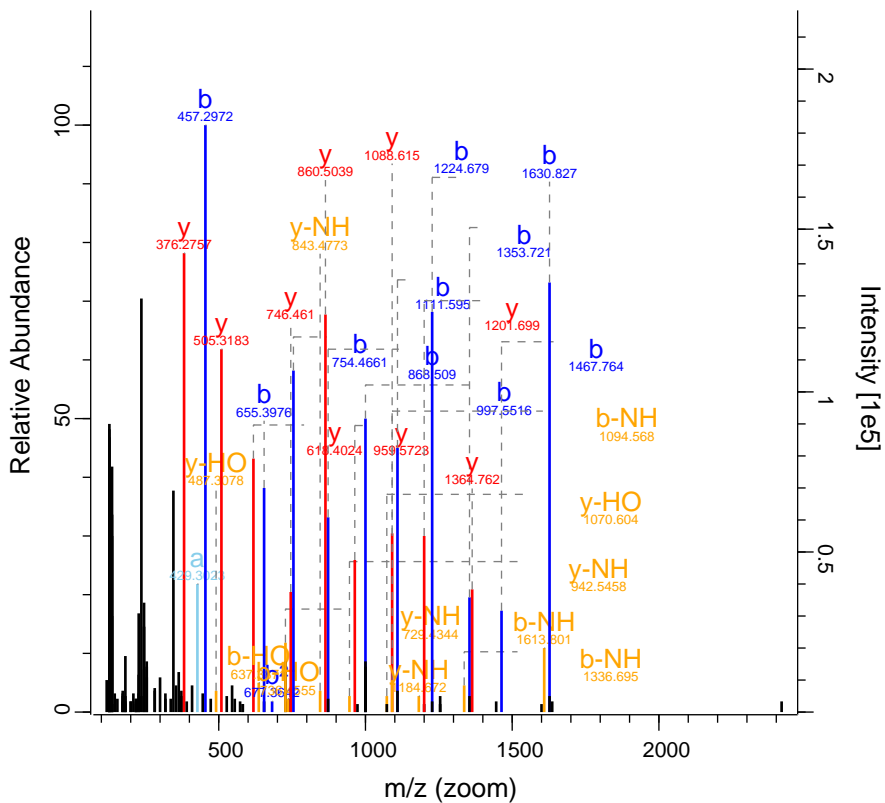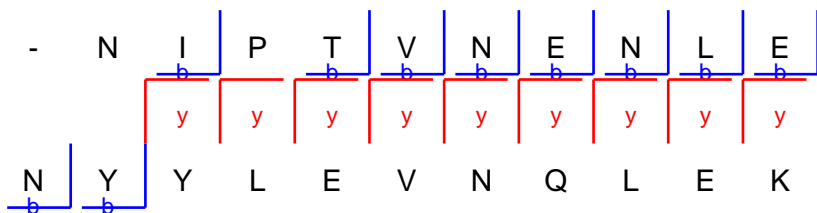

RO-QC-160121\_ZackD\_SS\_Set\_02\_Fractio 31340 FTMS; HC 107.35 741.35 BEX4

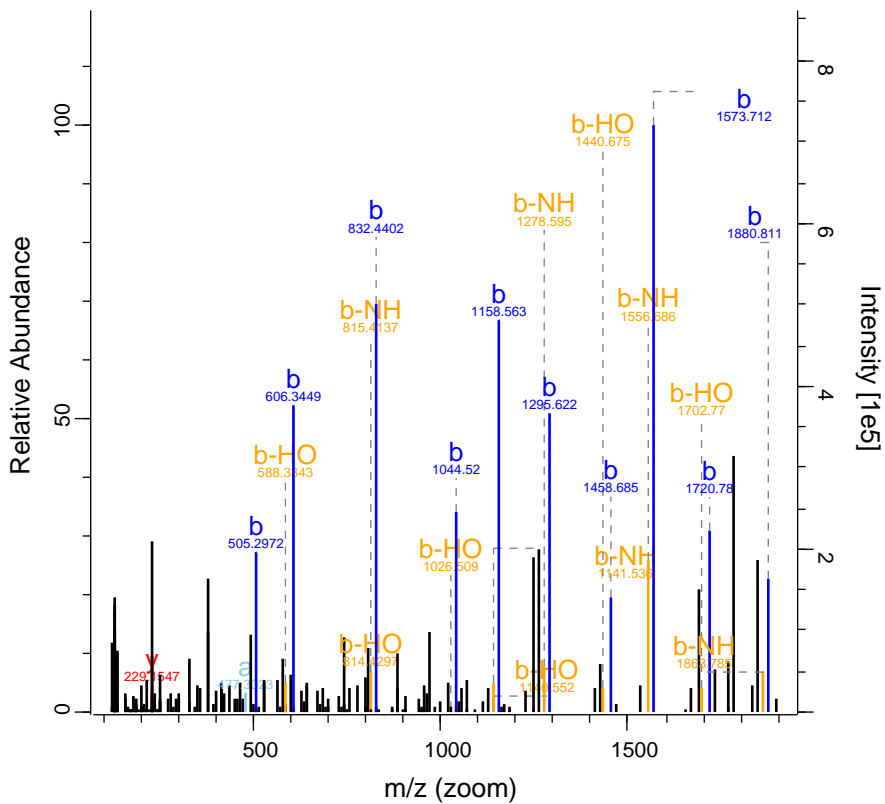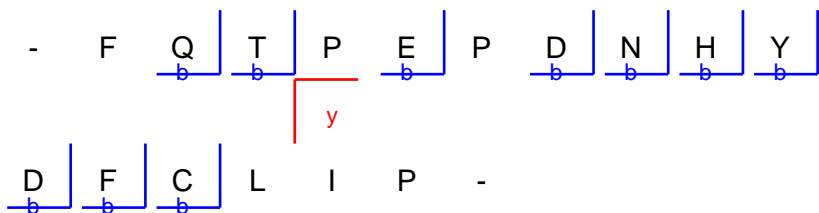

RO-QC-160121\_ZackD\_SS\_Set\_02\_Fractio 31618 FTMS; HC 133.89 568.01 GRPEL2

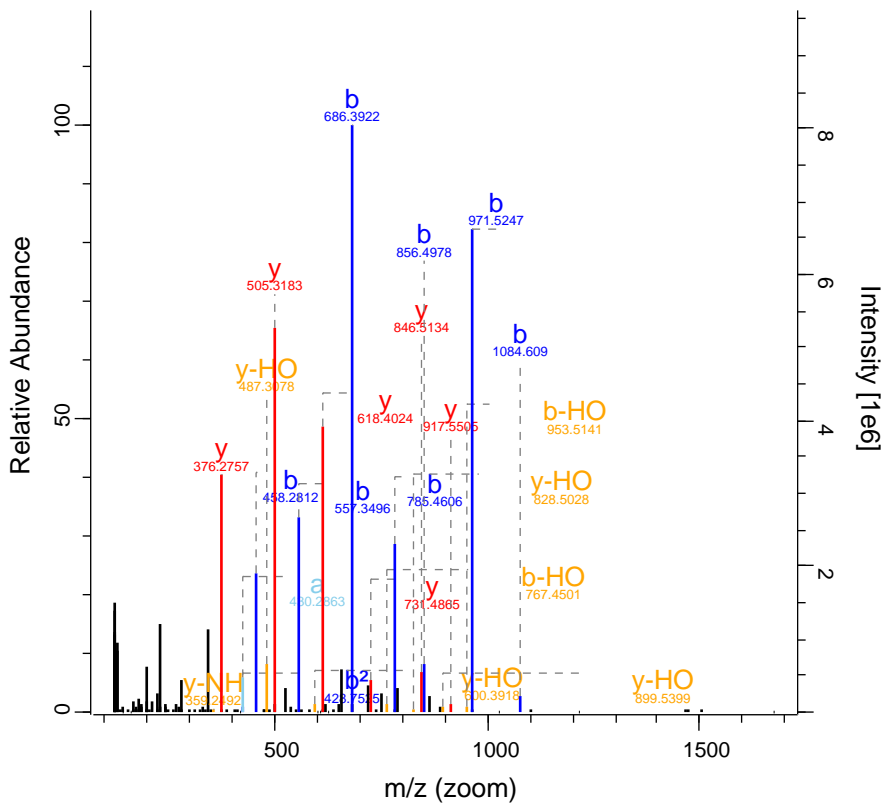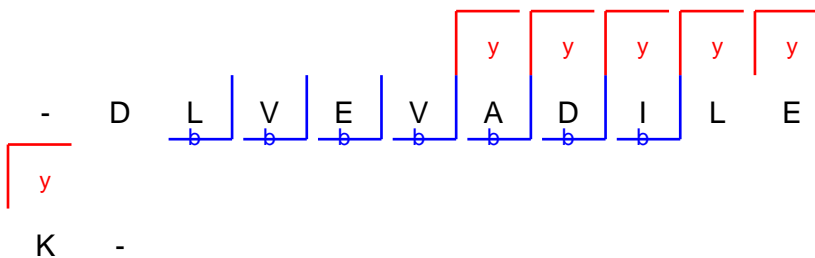

RO-QC-160121\_ZackD\_SS\_Set\_02\_Fraction 31619 FTMS; HC 194.6 851.51 GRPEL2

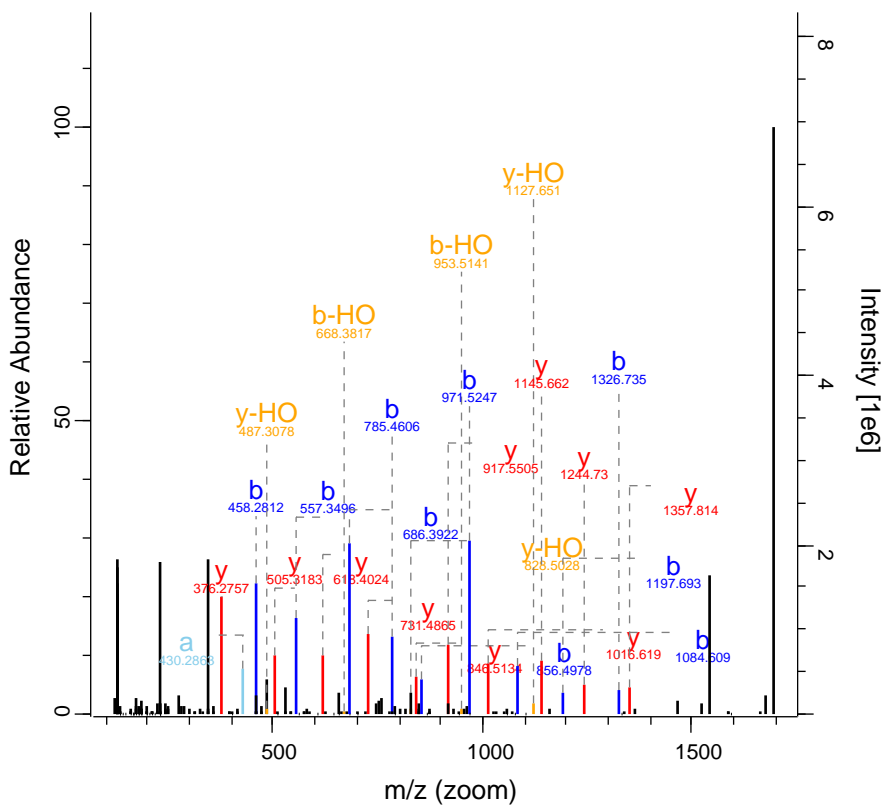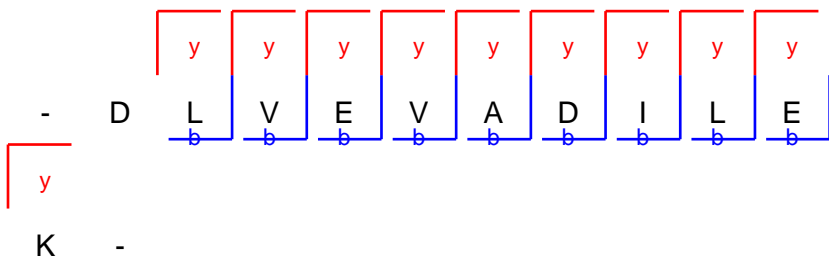

RO-QC-160121\_ZackD\_SS\_Set\_02\_Fraction 31740 FTMS; HCl 36.02 728.4 MILR1

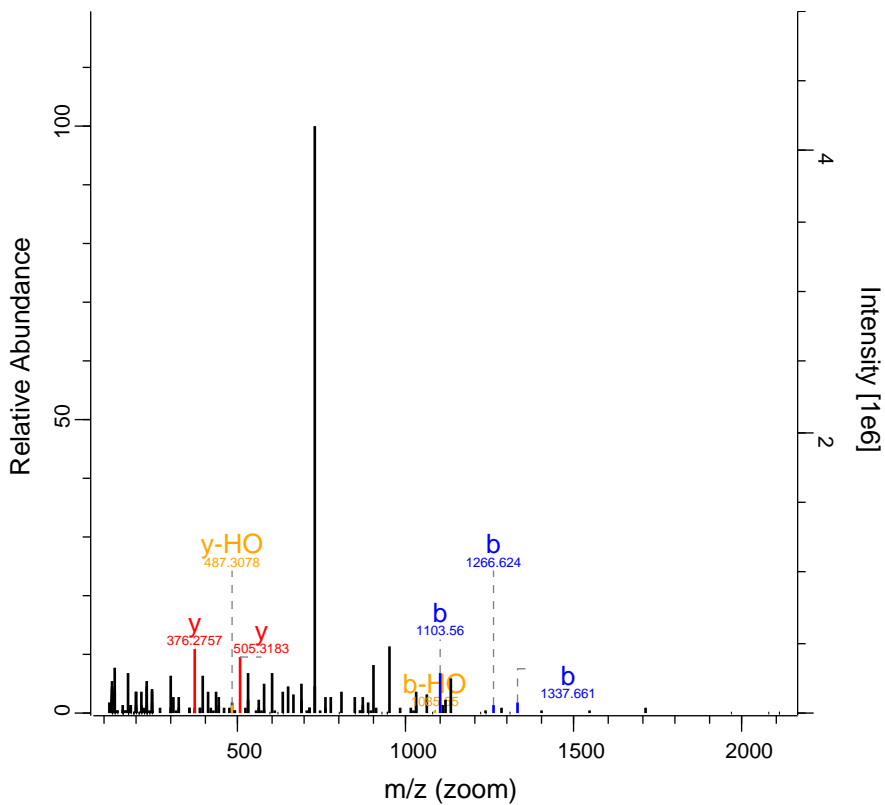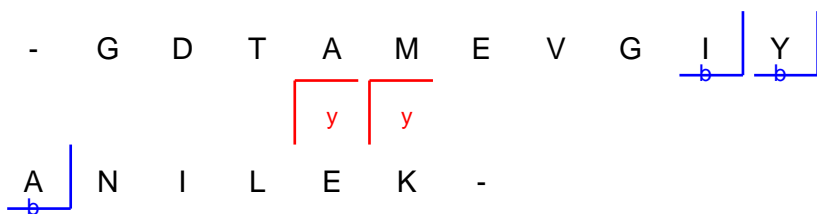

Raw File

Scan Method Score m/z

RO-QC-160121\_ZackD\_SS\_Set\_02\_Fraction\_2

32016 FTMS; HCD 52.68 678.9

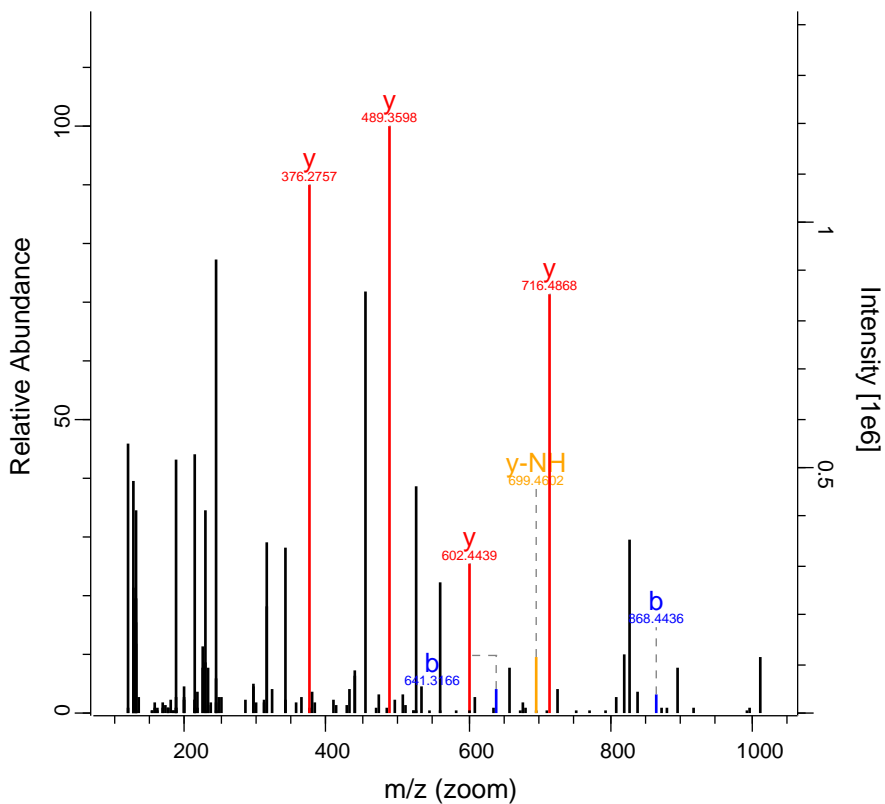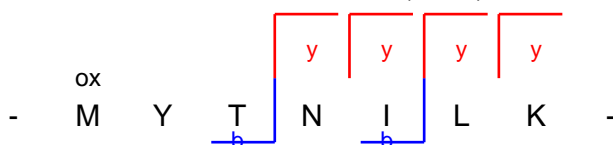

RO-QC-160121\_ZackD\_SS\_Set\_02\_Fraction 3732 FTMS; HCl 68.07 412.22 ZSCAN26

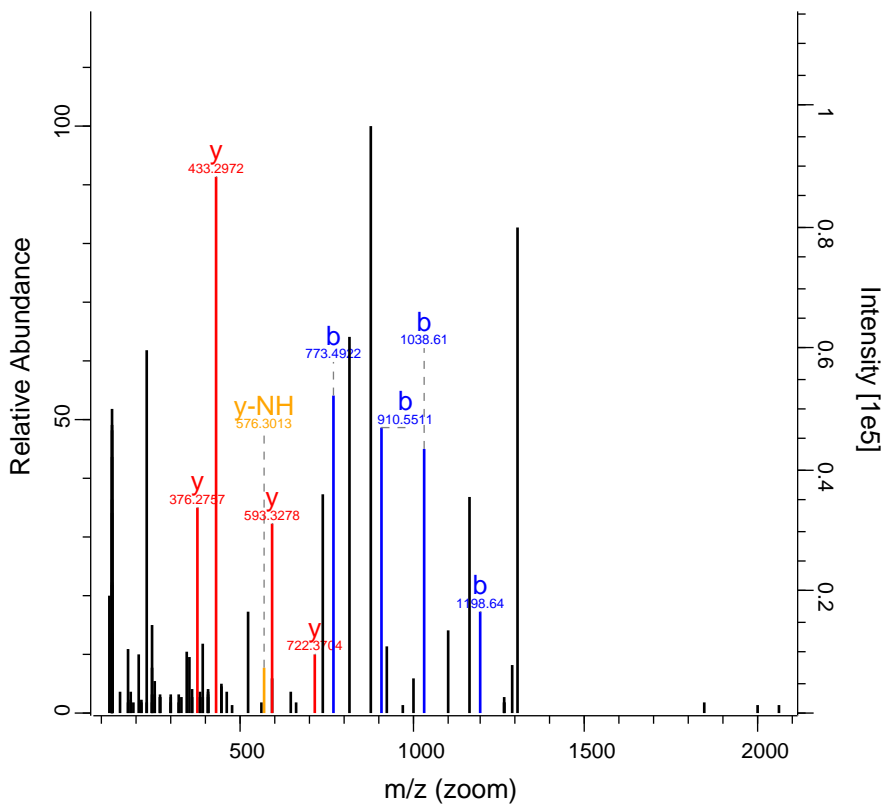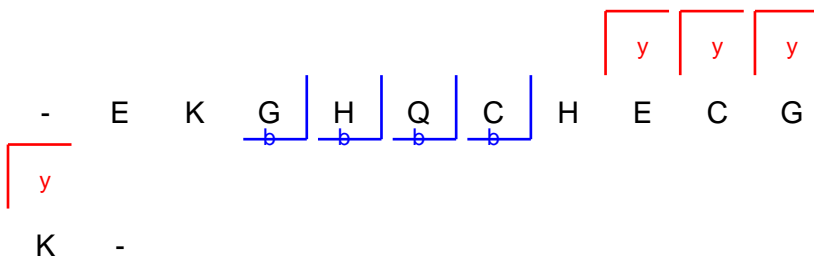





RO-QC-160121\_ZackD\_SS\_Set\_02\_Fraction 4645 FTMS; HCl 75.82 496.28 MYC

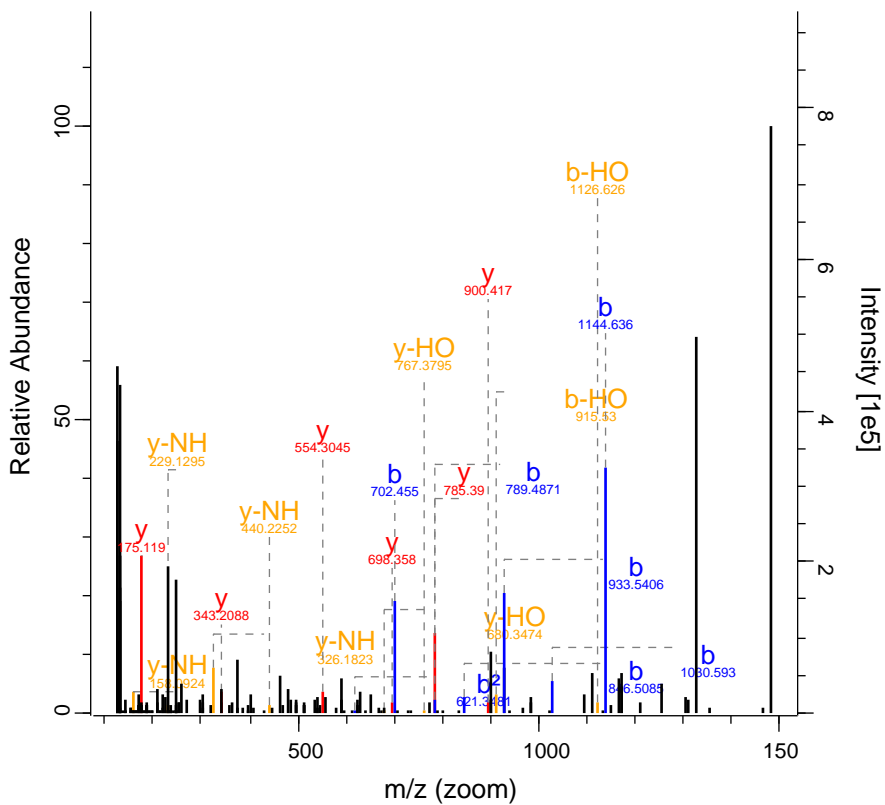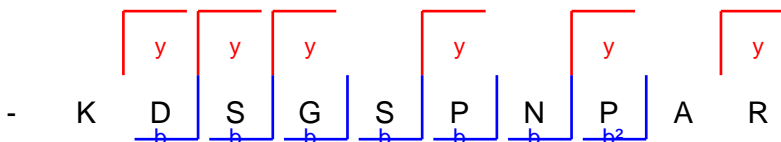

RO-QC-160121\_ZackD\_SS\_Set\_02\_Fraction 4866 FTMS; HCl 76.77 548.8 WIPF1

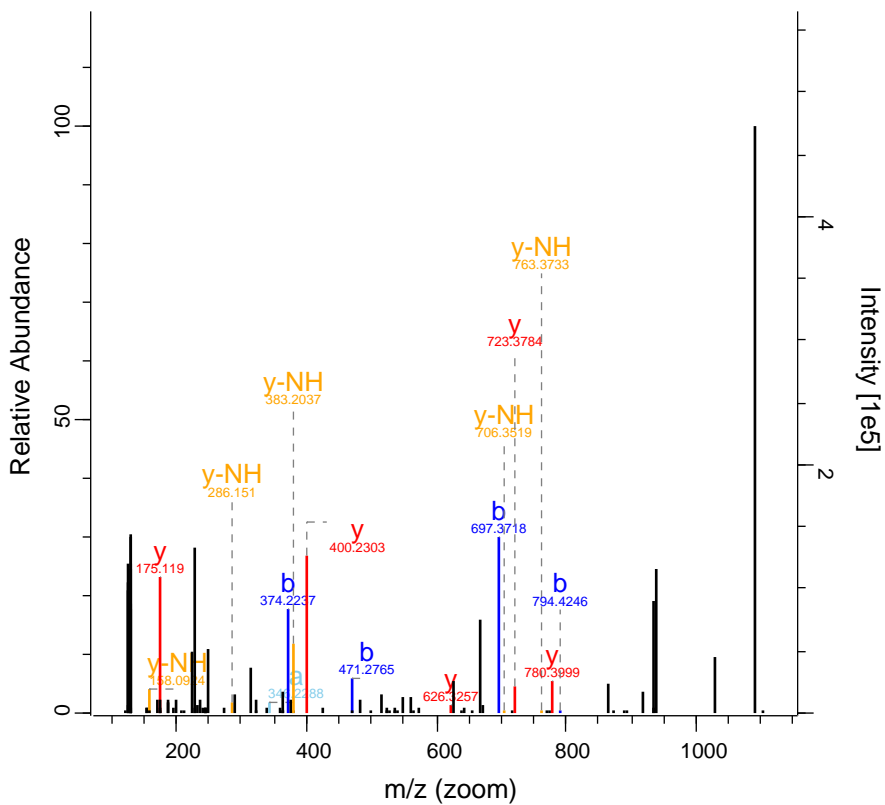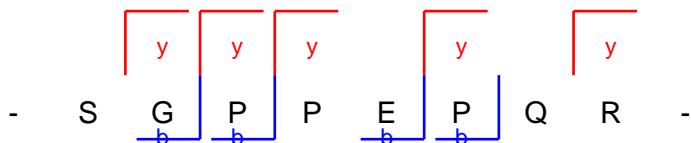

RO-QC-160121\_ZackD\_SS\_Set\_02\_Fraction 5235 FTMS; HCl 66.6 495.03 MYSM1

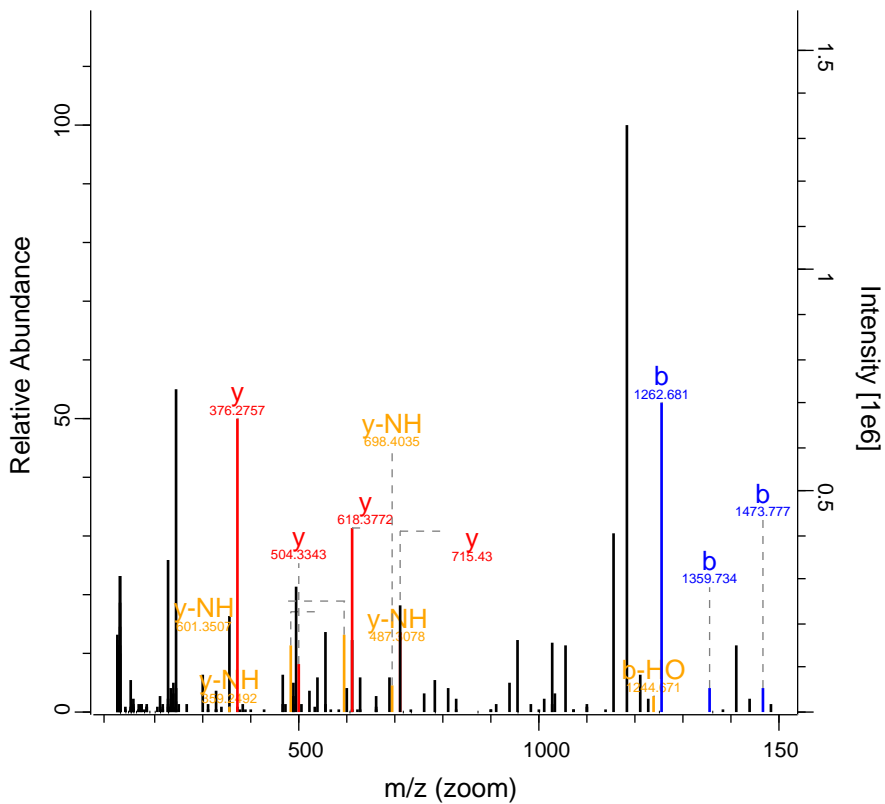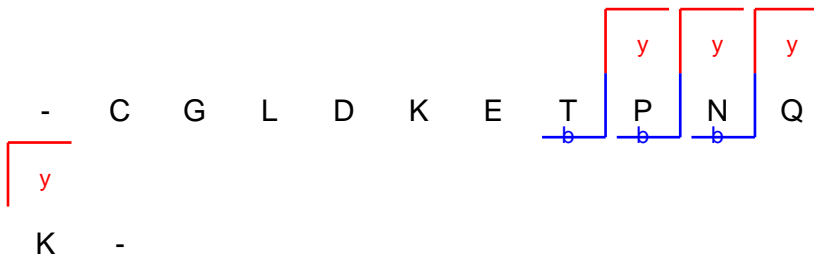



RO-QC-160121\_ZackD\_SS\_Set\_02\_Fraction\_3

5521 FTMS; HCD 46.57 357.2

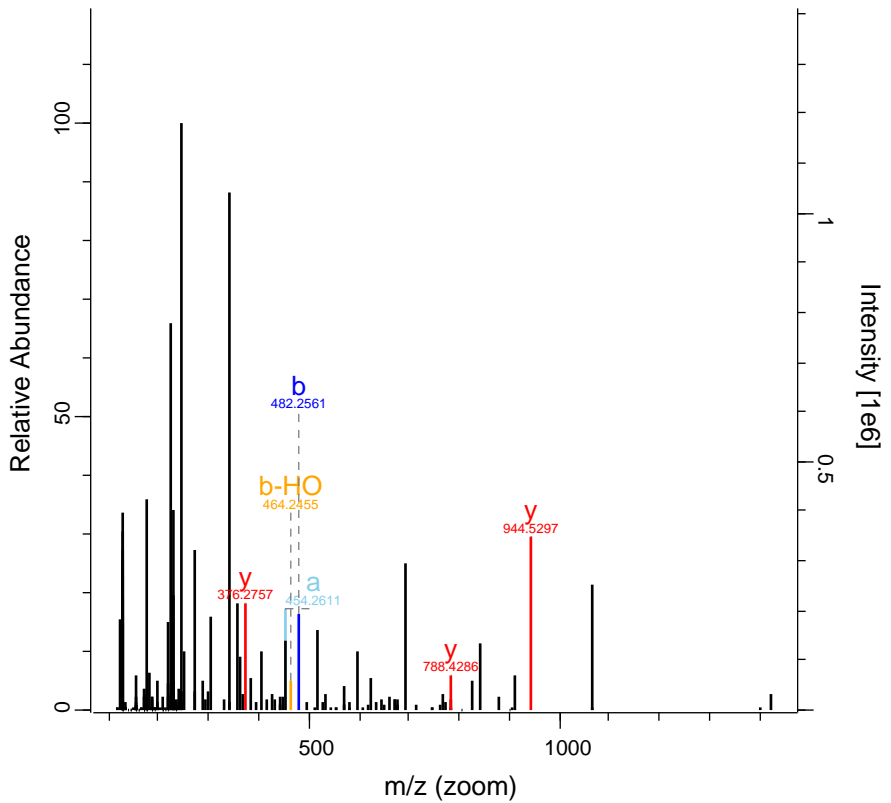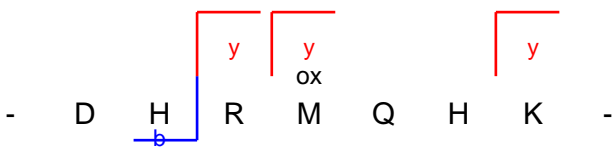

RO-QC-160121\_ZackD\_SS\_Set\_02\_Fraction 5917 FTMS; HCl 99.82 686.31 C5orf45

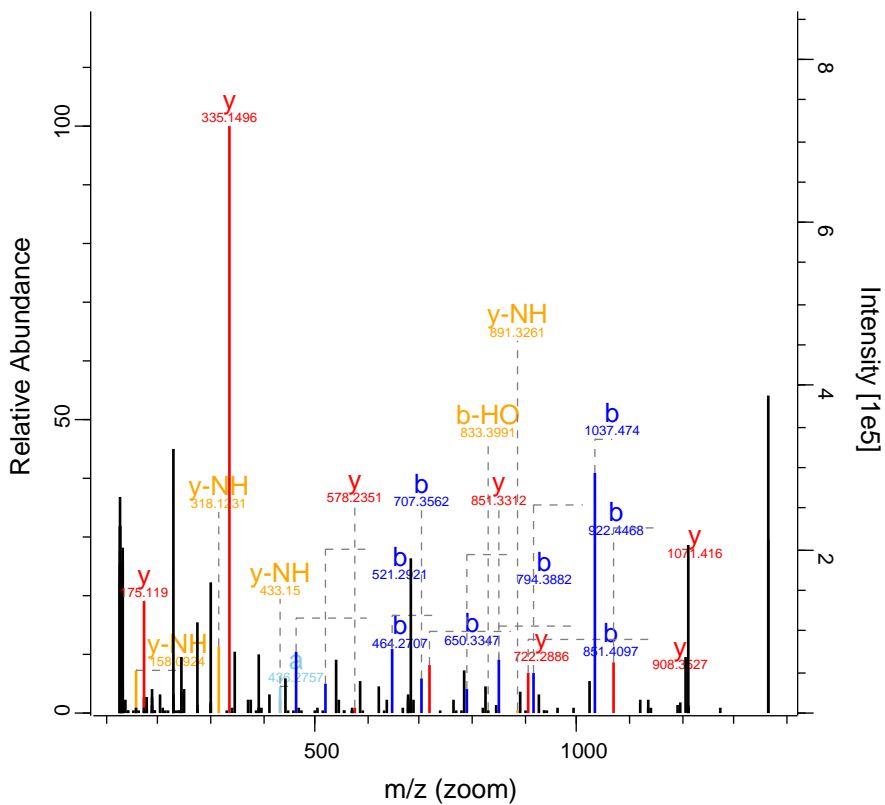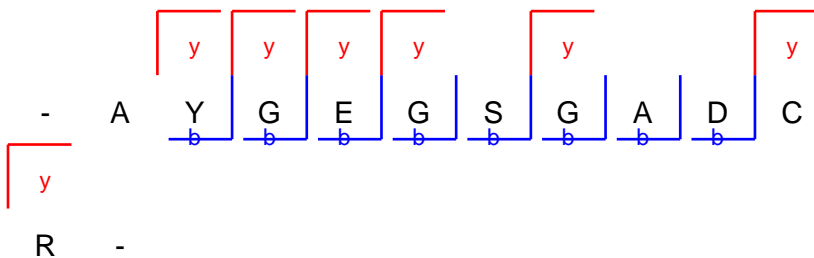

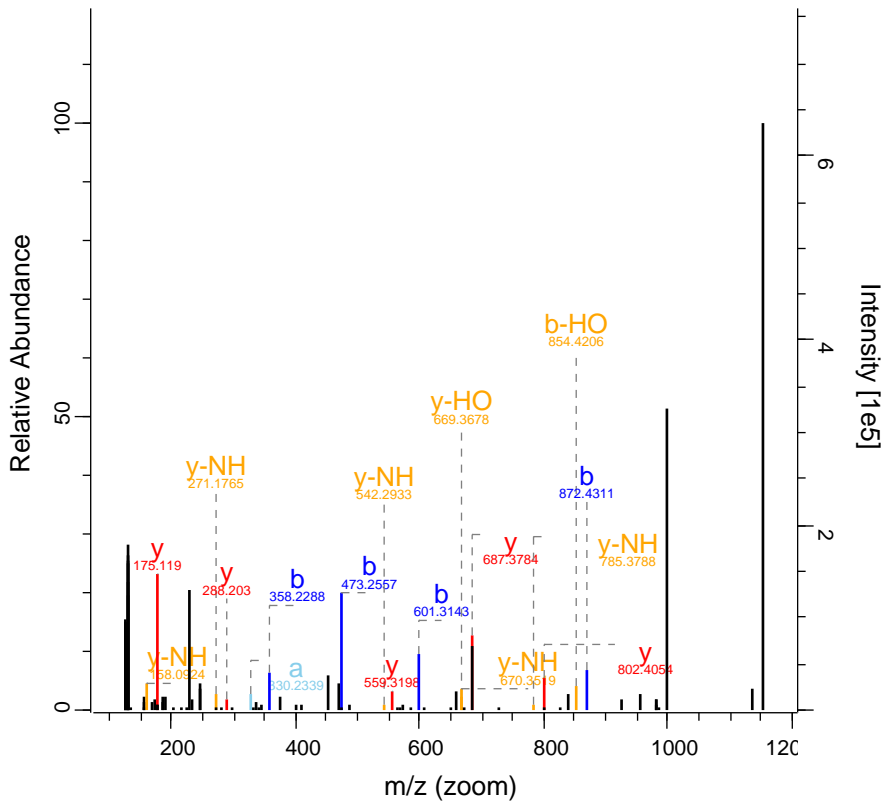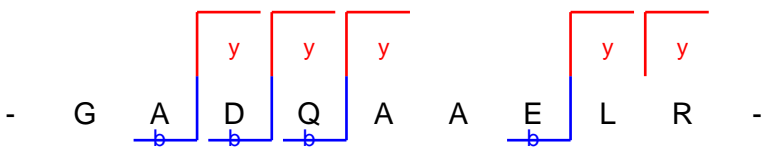



RO-QC-160121\_ZackD\_SS\_Set\_02\_Fraction\_6697 FTMS; HCl 96.41 660 CASP2

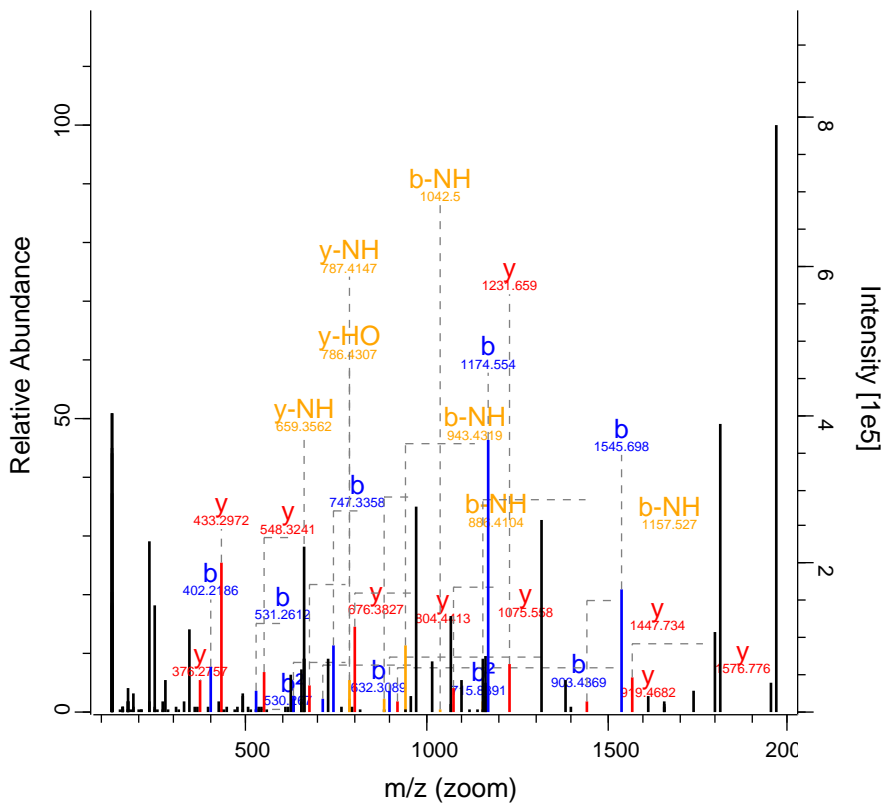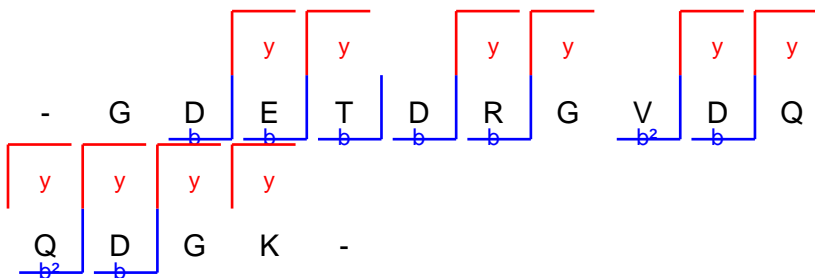

RO-QC-160121\_ZackD\_SS\_Set\_02\_Fraction 7143 FTMS; HCl 70.44 618.02 SLC16A7

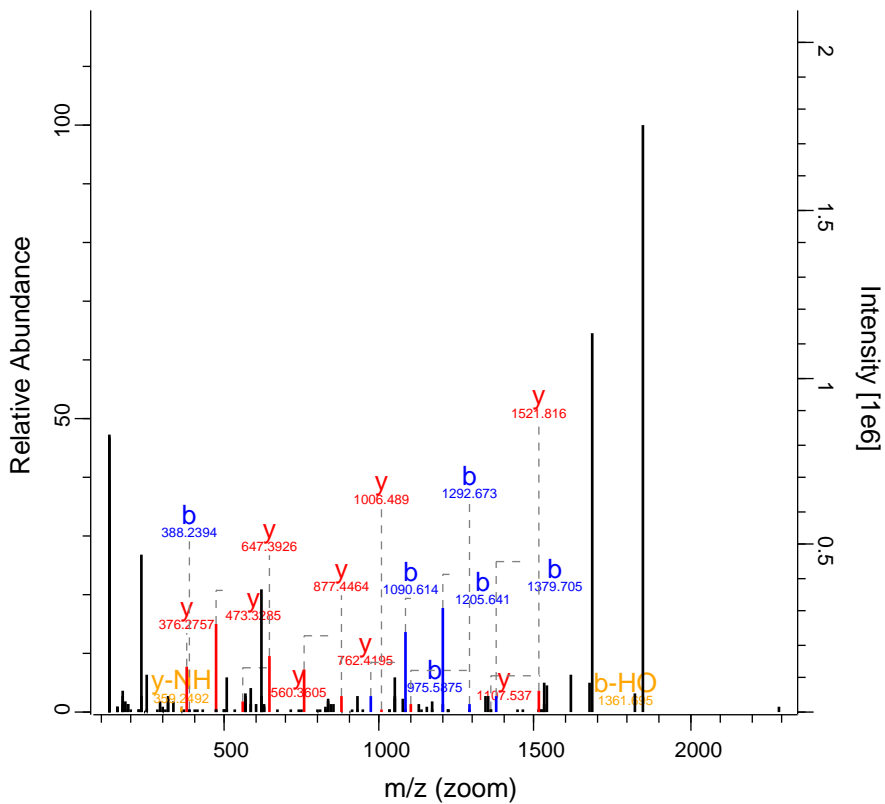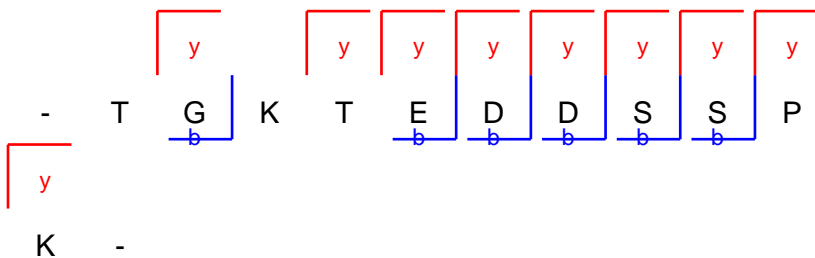

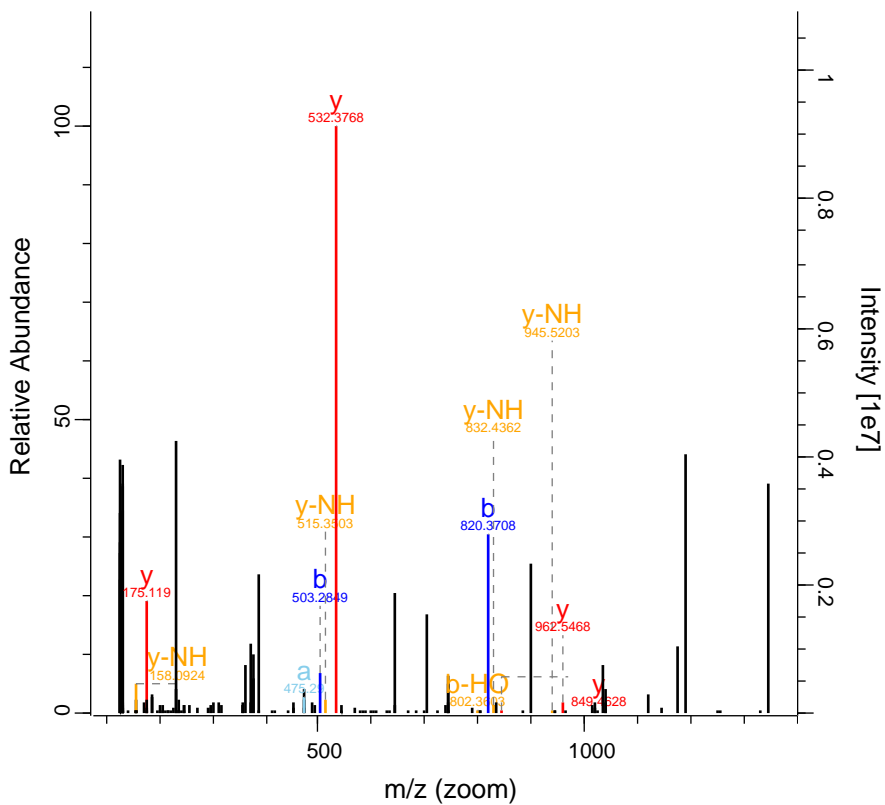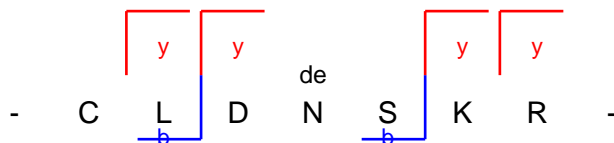

RO-QC-160121\_ZackD\_SS\_Set\_02\_Fraction 7781 FTMS; HCl 70.86 370.56 NHLRC1

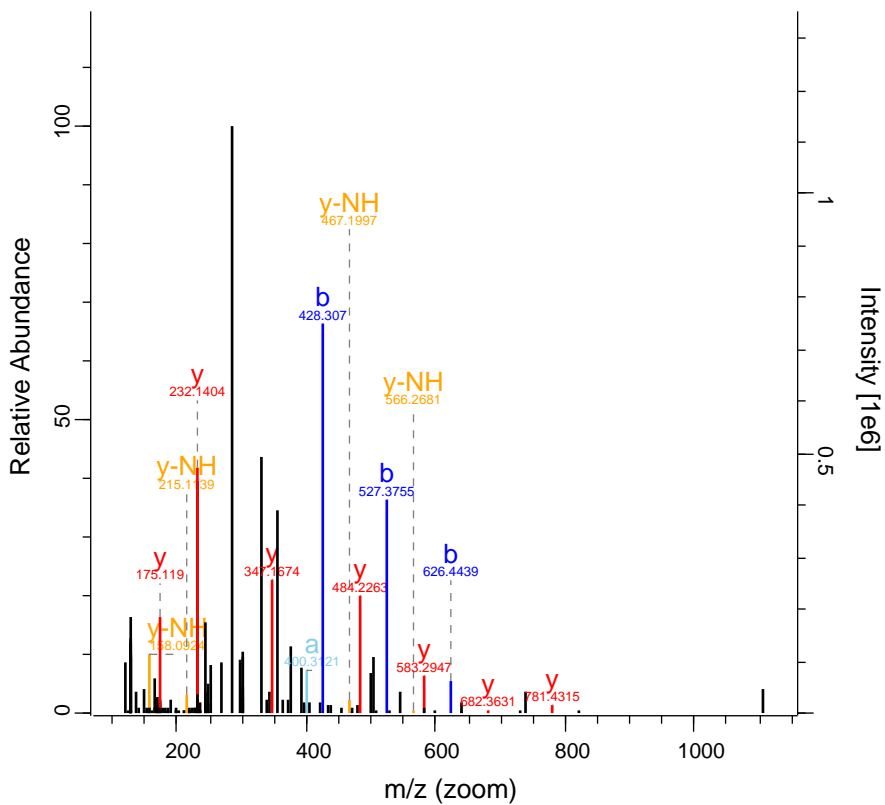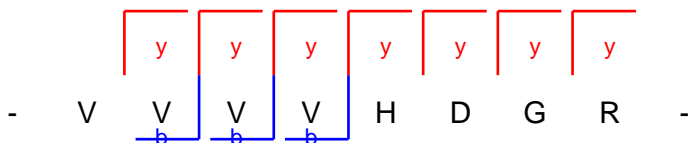

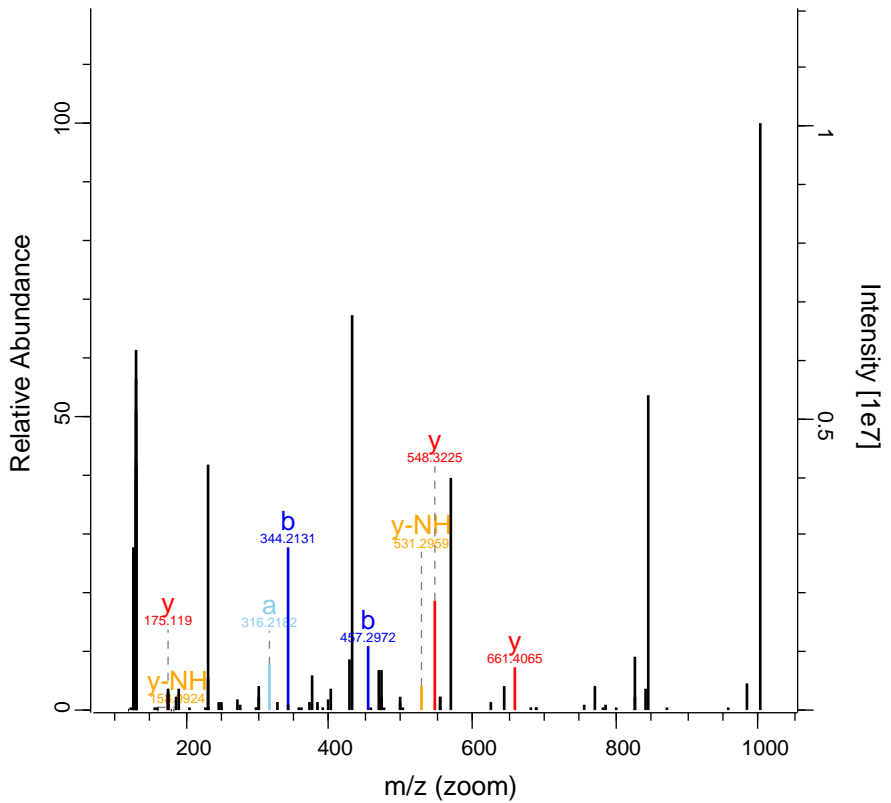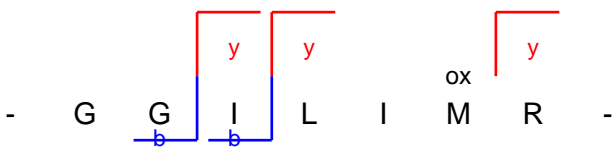

RO-QC-160121\_ZackD\_SS\_Set\_02\_Fraction 8784 FTMS; HCl 76.34 638.33 ERICH1

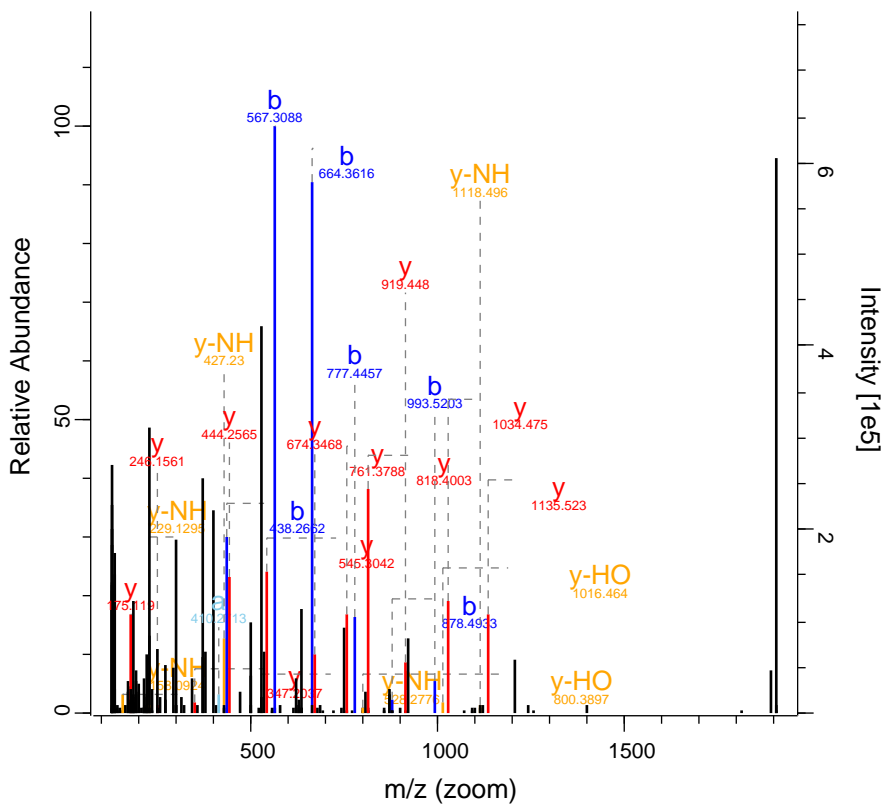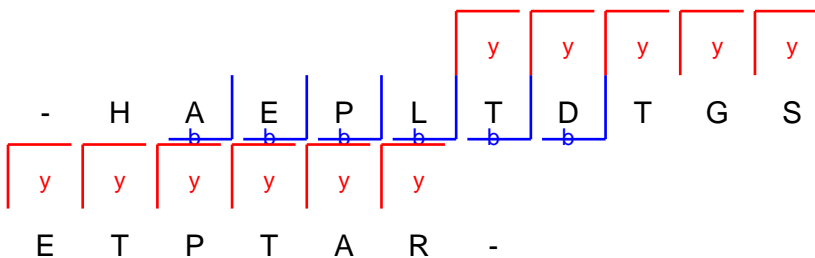

RO-QC-160121\_ZackD\_SS\_Set\_02\_Fraction 9316 FTMS; HCl 78.82 623.83 TXNDC11

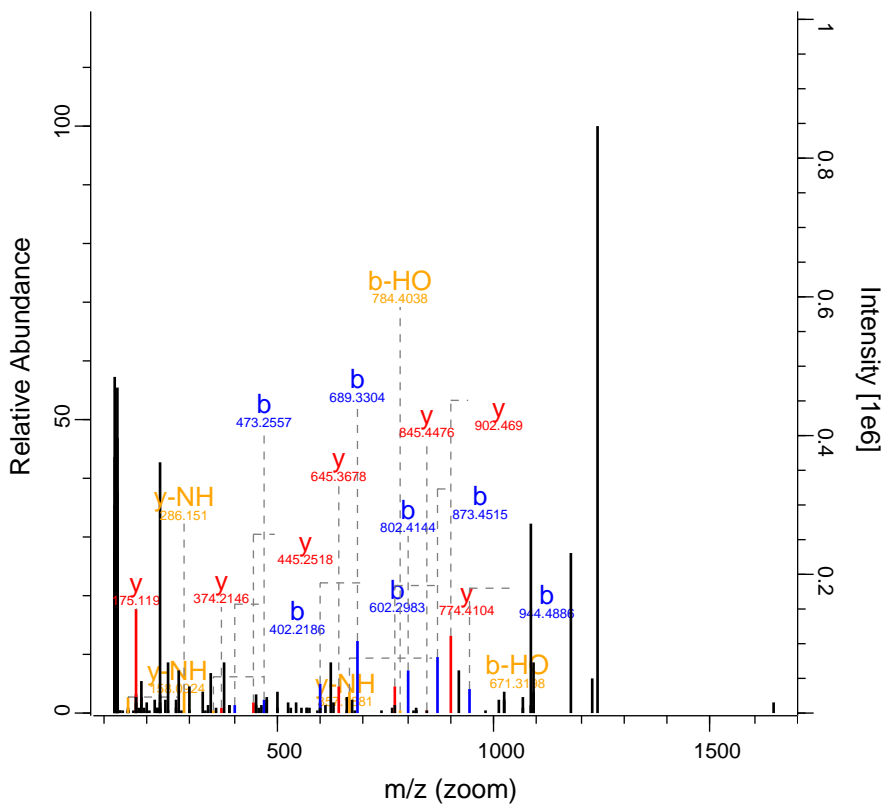

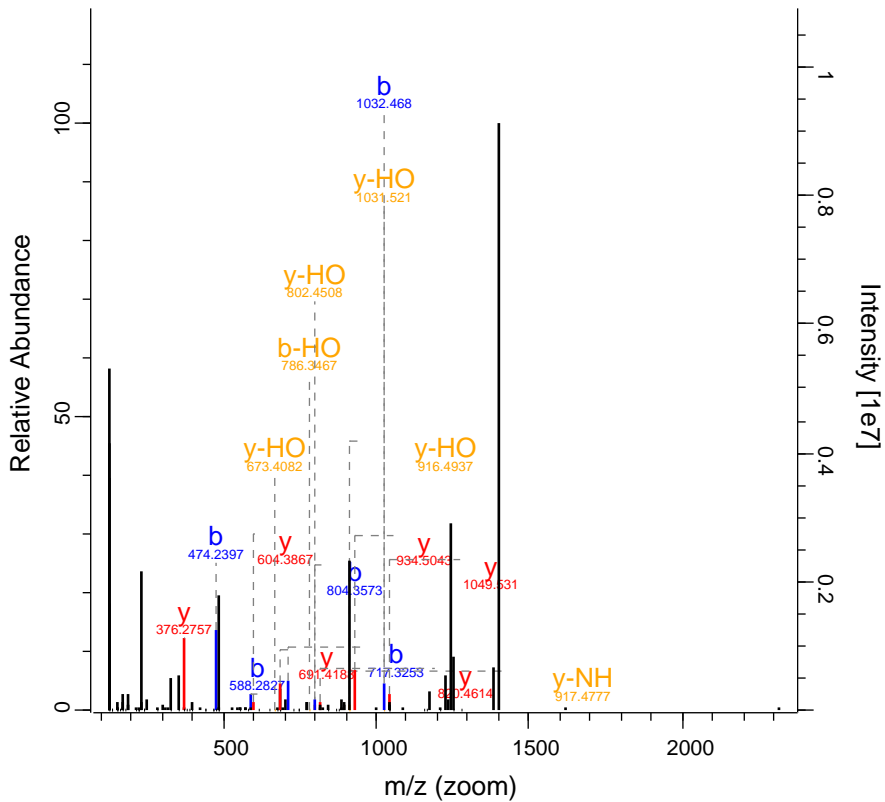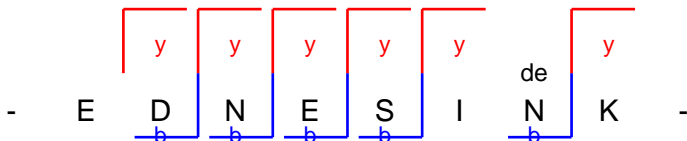



RO-QC-160121\_ZackD\_SS\_Set\_02\_Fraction 9783 FTMS; HC 139.28 637.88 G6PC3

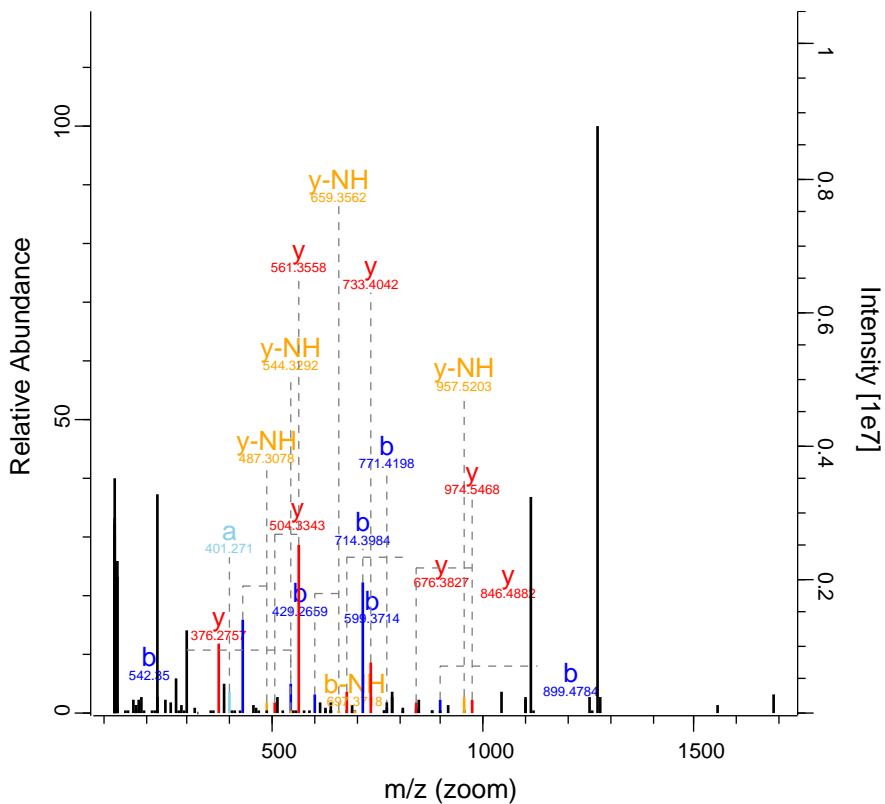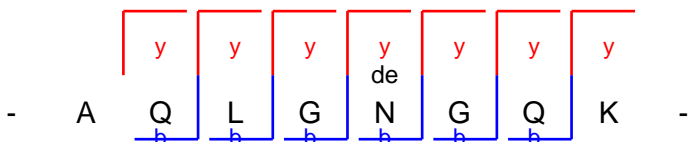

RO-QC-160121\_ZackD\_SS\_Set\_02\_Fraction 9912 FTMS; HCl 42.82 584.67 OR2AE1

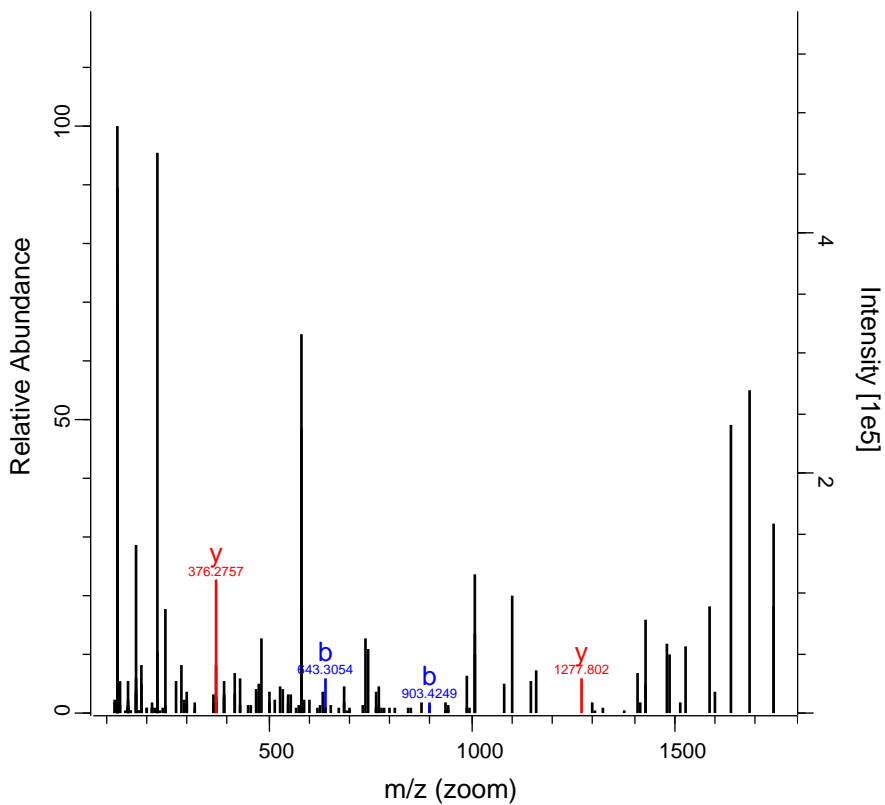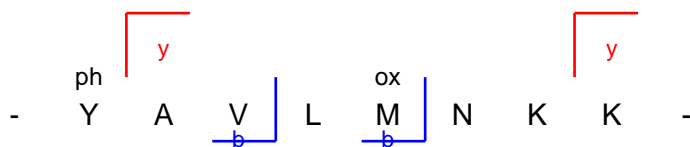



RO-QC-160121\_ZackD\_SS\_Set\_02\_Fractio 10494 FTMS; HC 166.16 739.38 PLP2

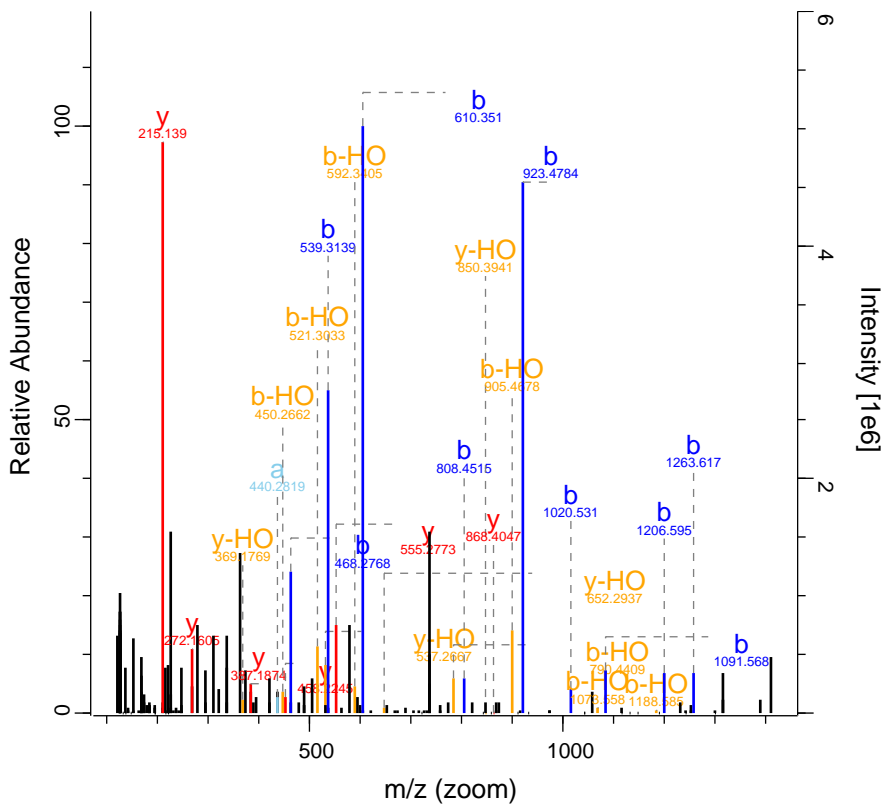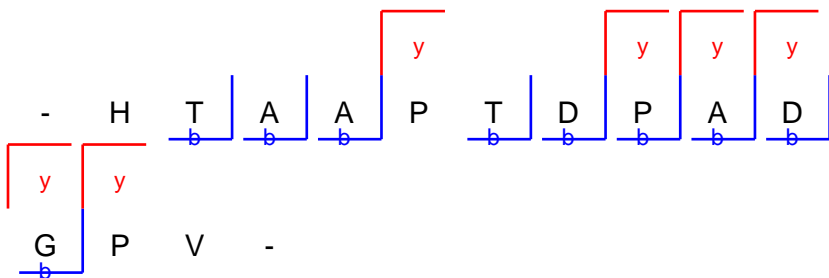

RO-QC-160121\_ZackD\_SS\_Set\_02\_Fraccio 10716 FTMS; HC 146.81 739.38 PLP2

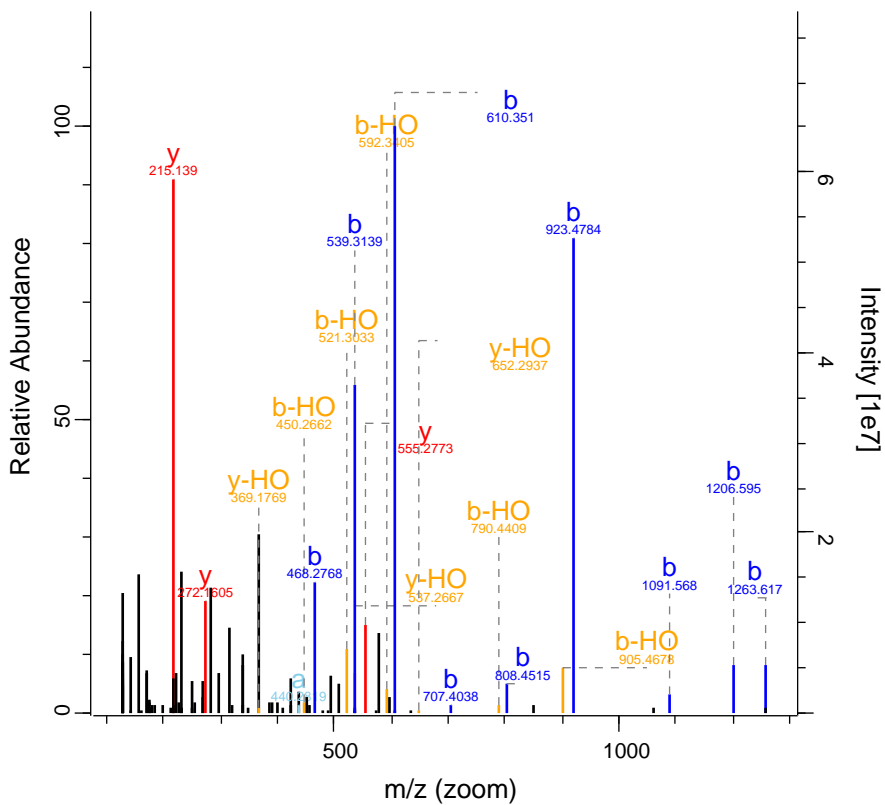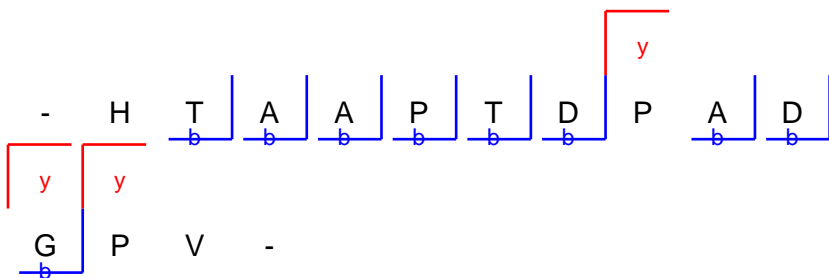

RO-QC-160121\_ZackD\_SS\_Set\_02\_Fraction 10954 FTMS; HC 90.13 739.38 PLP2

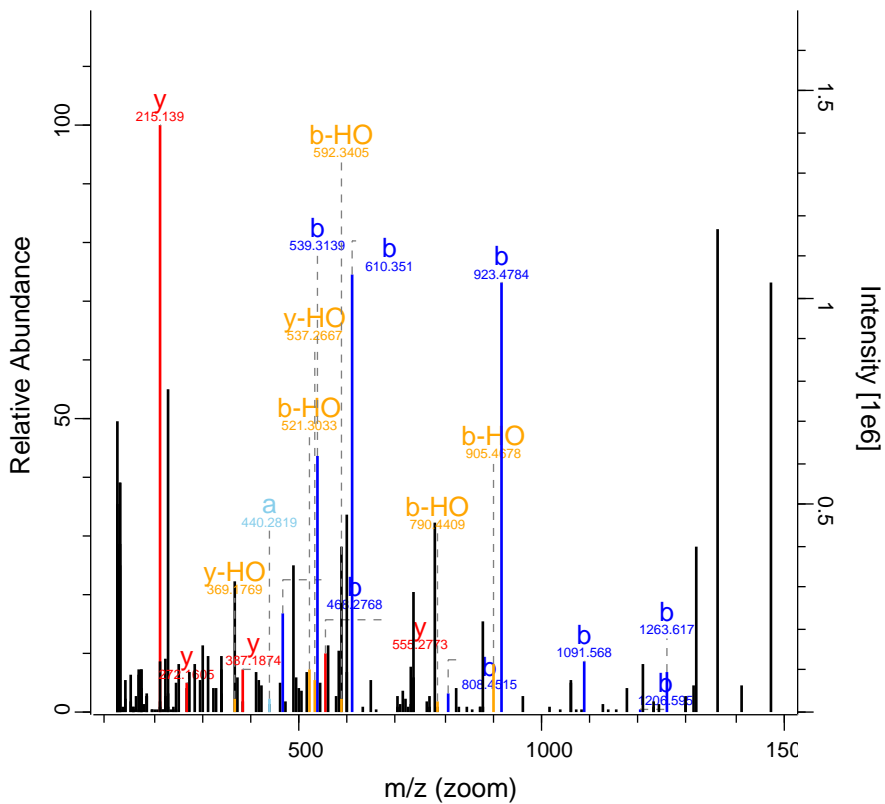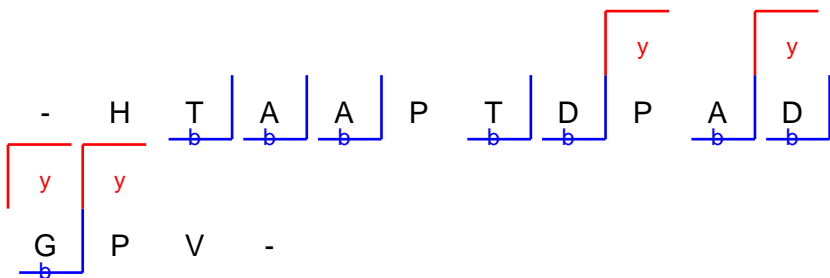



RO-QC-160121\_ZackD\_SS\_Set\_02\_Fraction 12903 FTMS; HC 50.91 629.35 SLC7A14

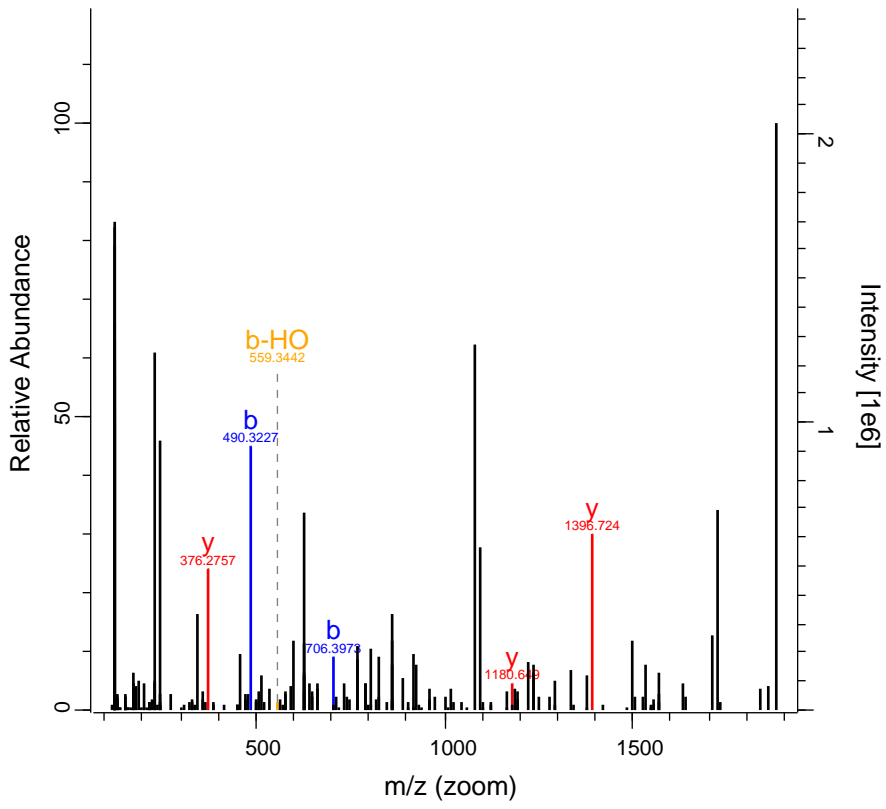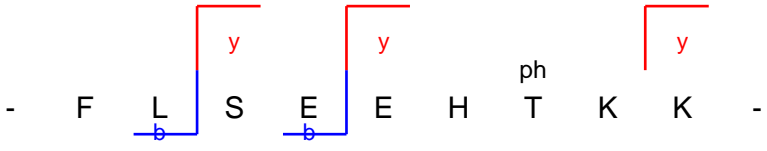



RO-QC-160121\_ZackD\_SS\_Set\_02\_Fractio 13369 FTMS; HC 132.01 714.93 DSE

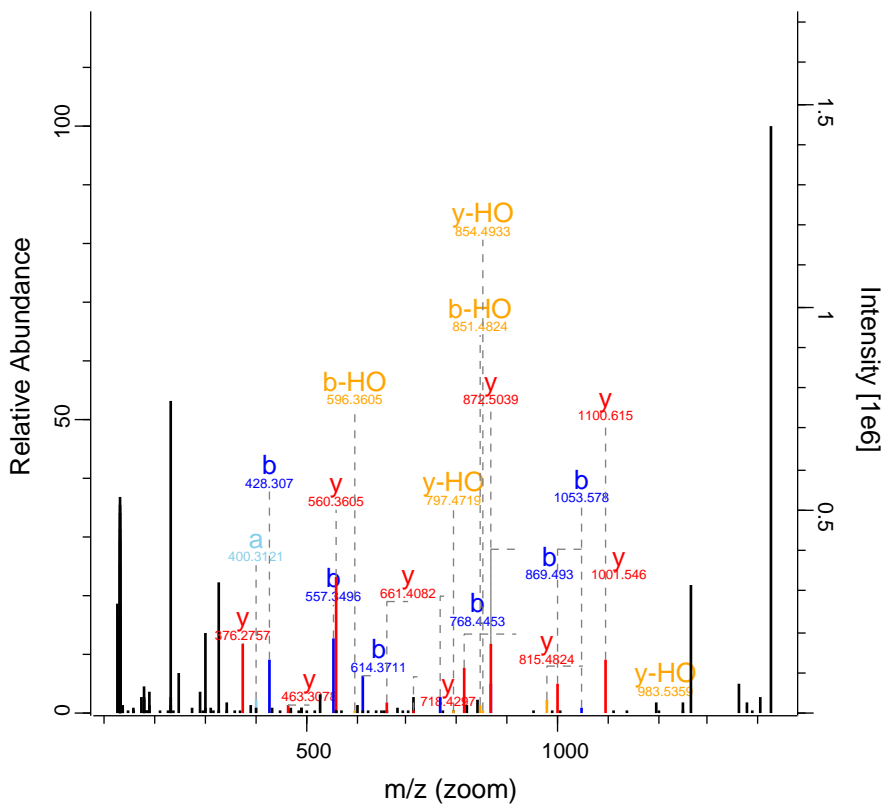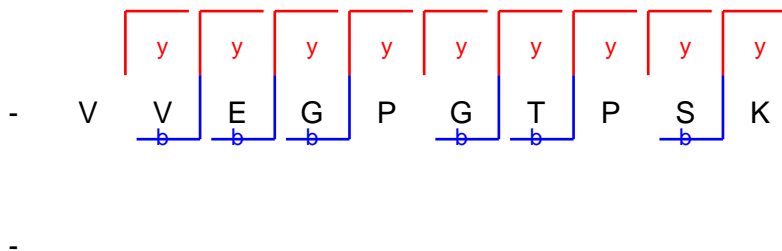

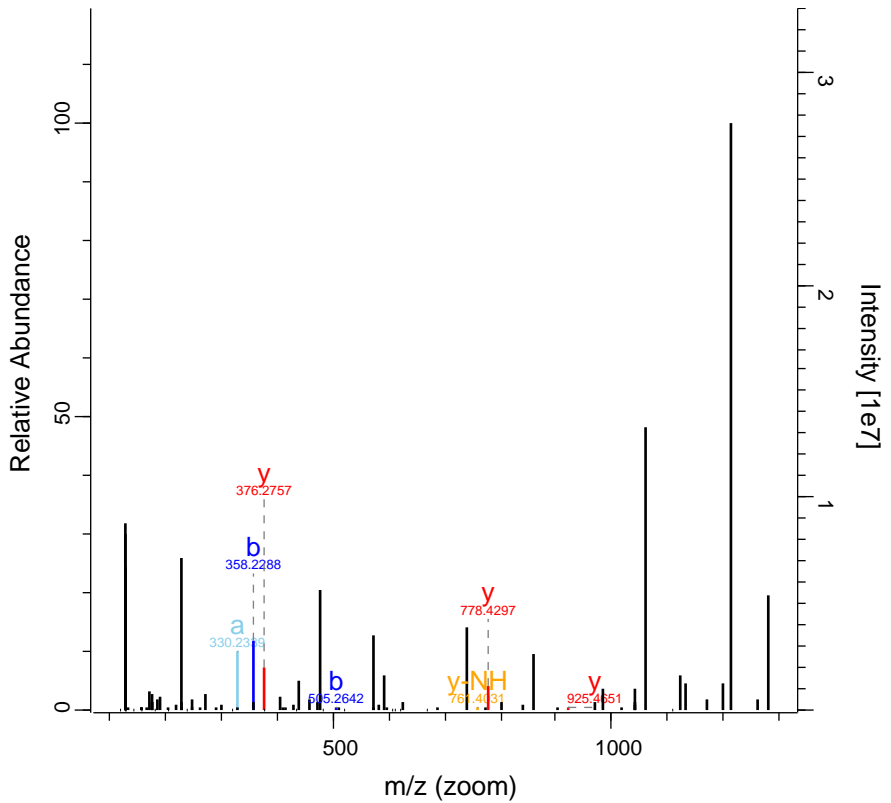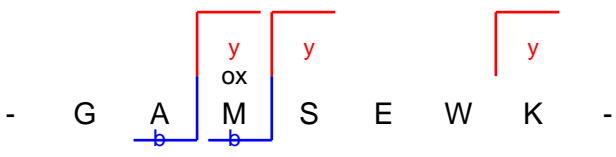

| Raw File                                | Scan  | Method    | Score | m/z    |
|-----------------------------------------|-------|-----------|-------|--------|
| RO-QC-160121_ZackD_SS_Set_02_Fraction_3 | 14193 | FTMS; HCD | 62    | 641.85 |

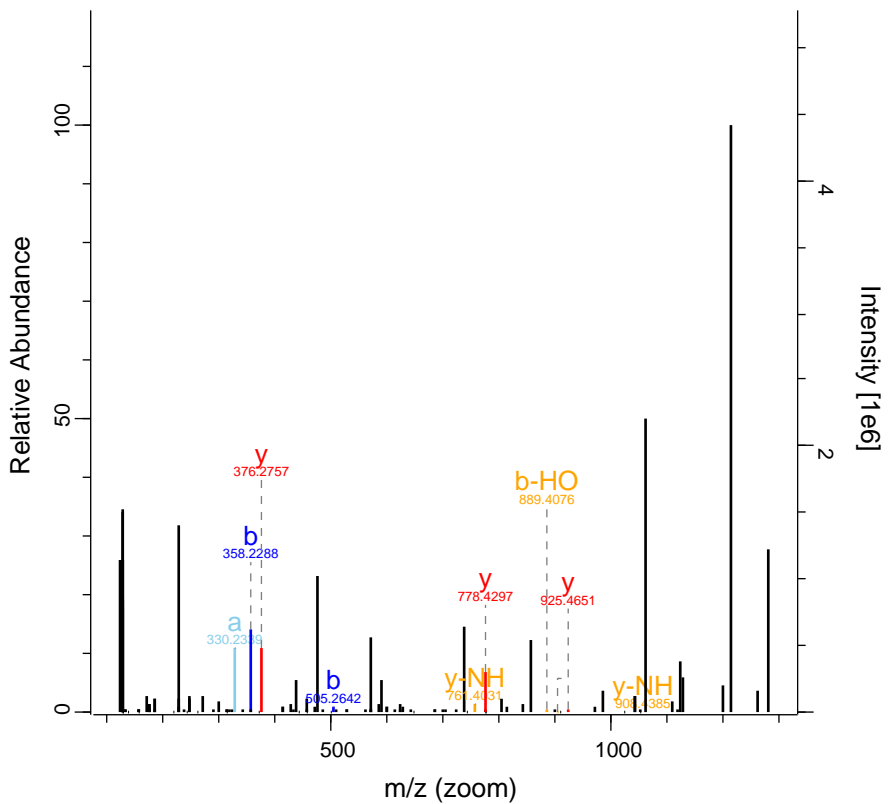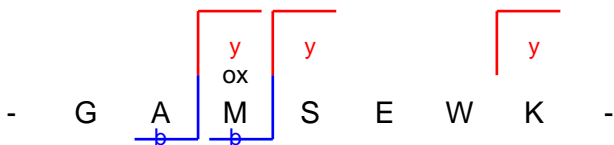

RO-QC-160121\_ZackD\_SS\_Set\_02\_Fractio 14531 FTMS; HC 113.69 729.38 JOSD2

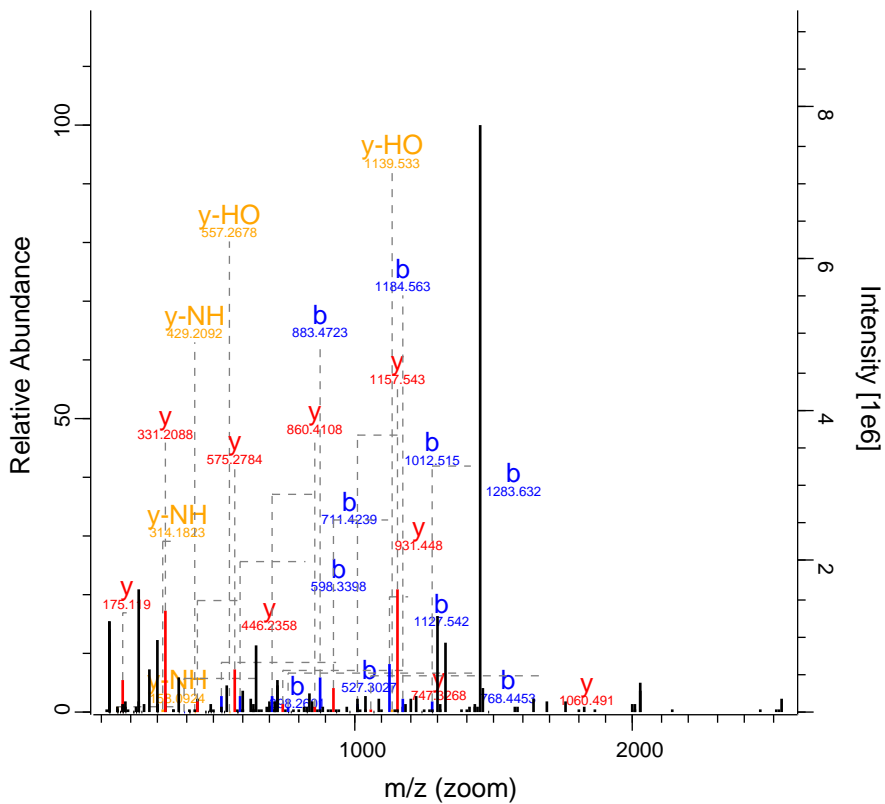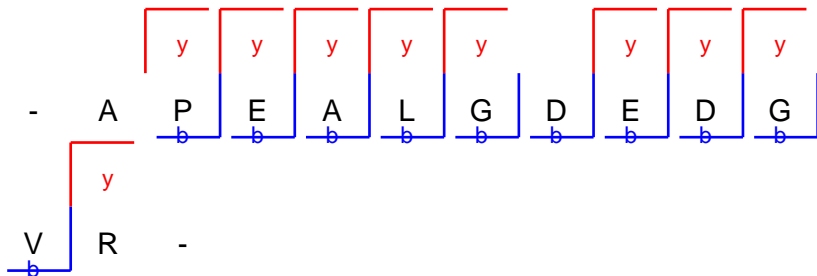

RO-QC-160121\_ZackD\_SS\_Set\_02\_Fraction 15185 FTMS; HC 66.27 403.98 BPIFB4

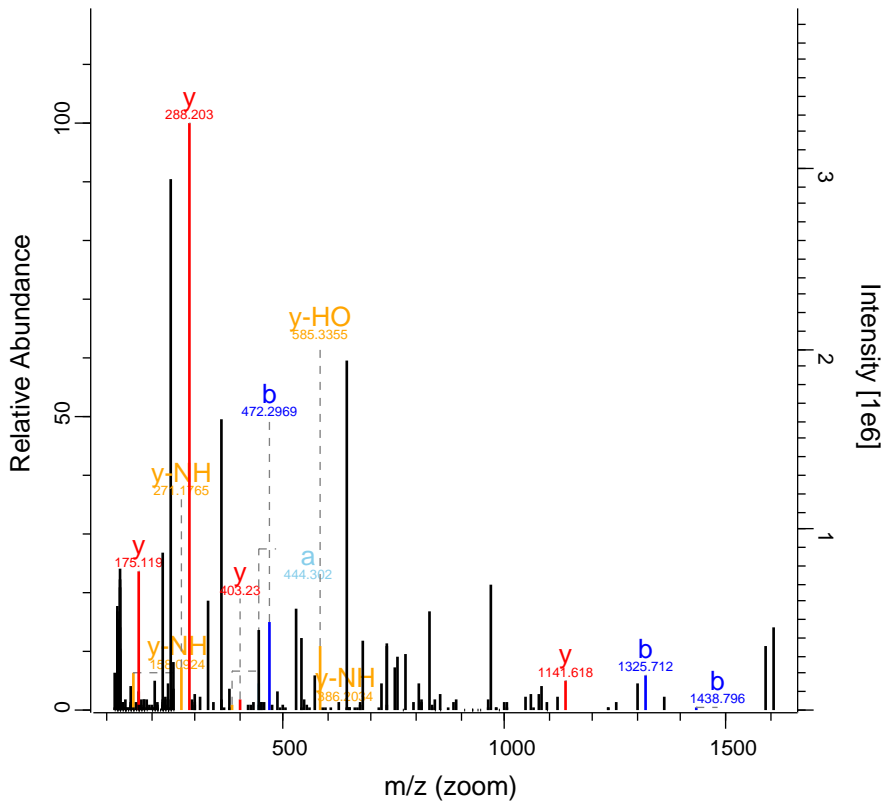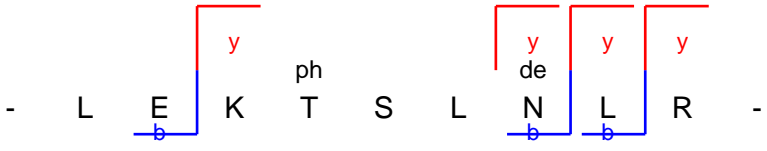

RO-QC-160121\_ZackD\_SS\_Set\_02\_Fraction 15203 FTMS; HC 81.3 703.41 ATG12

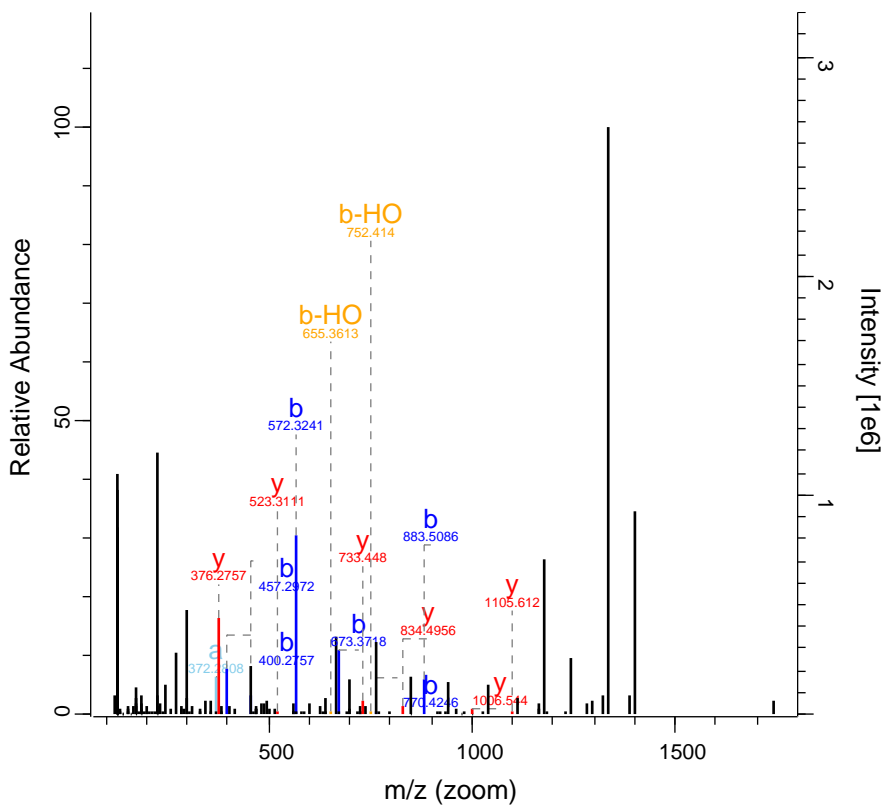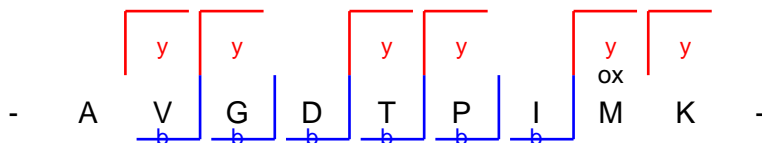

RO-QC-160121\_ZackD\_SS\_Set\_02\_Fraction 15346 FTMS; HC 87.64 691.39 SLC7A6

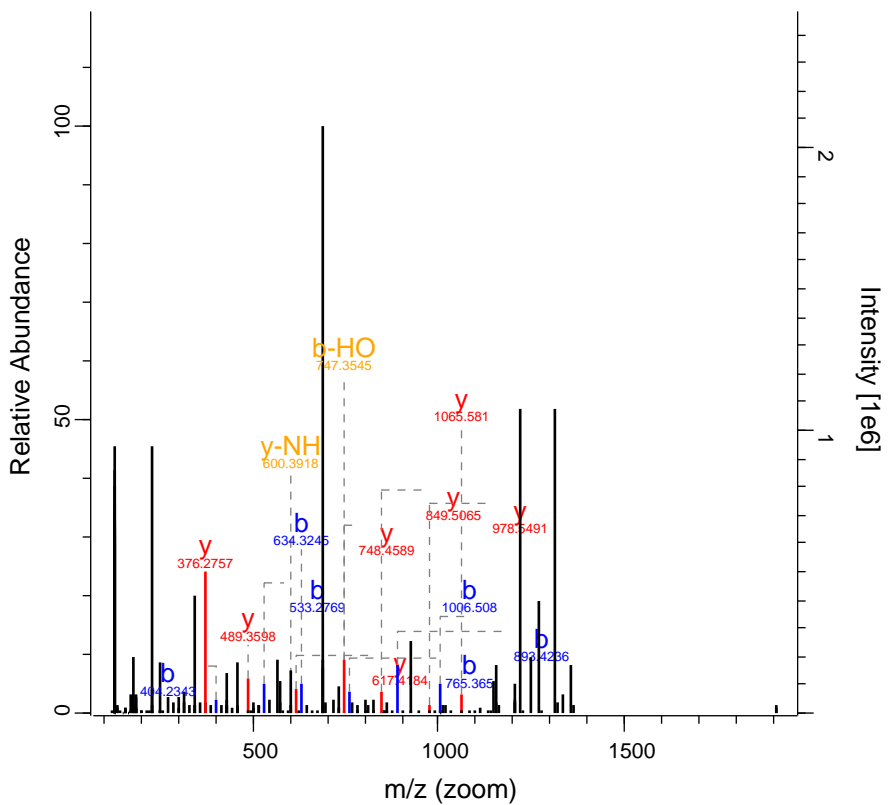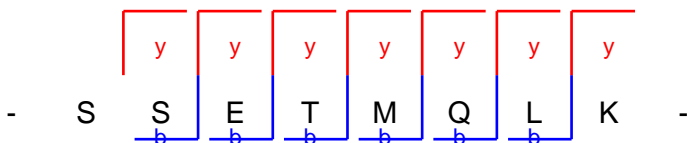

RO-QC-160121\_ZackD\_SS\_Set\_02\_Fraction 15359 FTMS; HC 40.07 704.33 TBX19

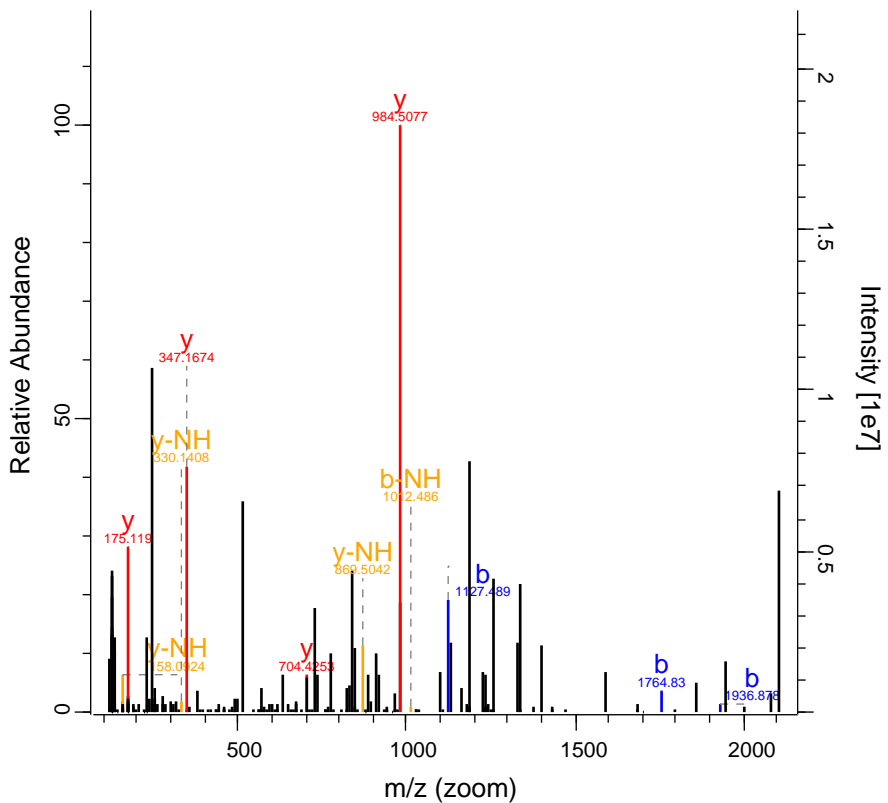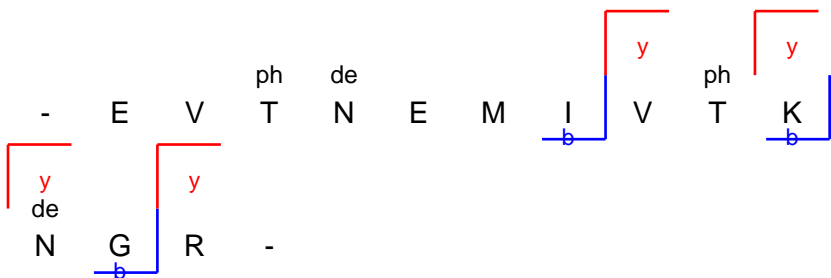



RO-QC-160121\_ZackD\_SS\_Set\_02\_Fractio 16076 FTMS; HC 116.55 848.45 DTL

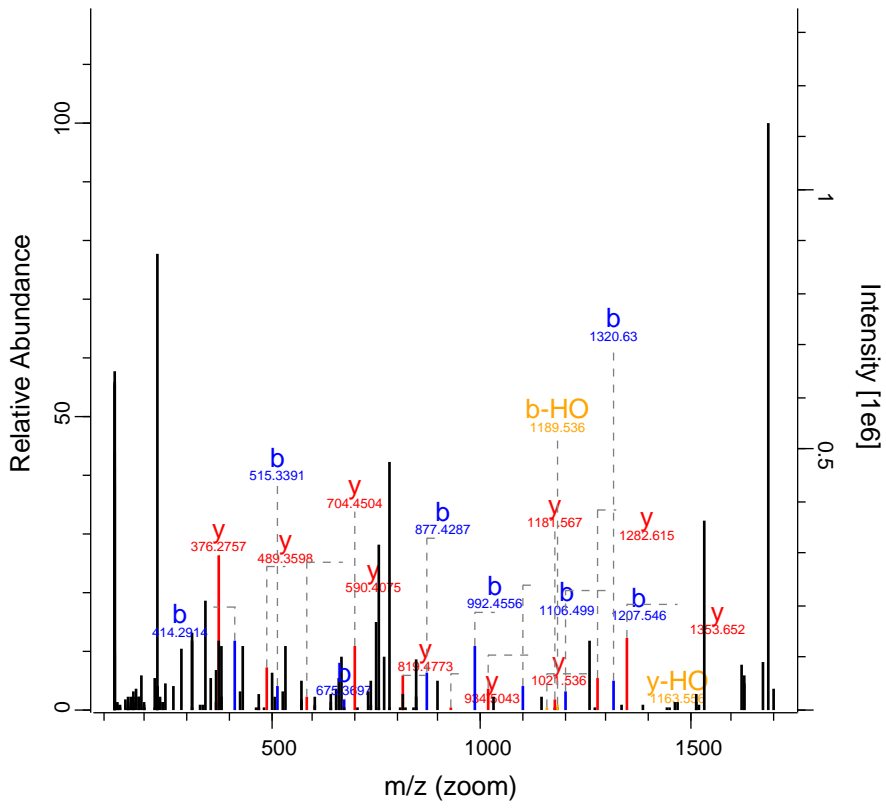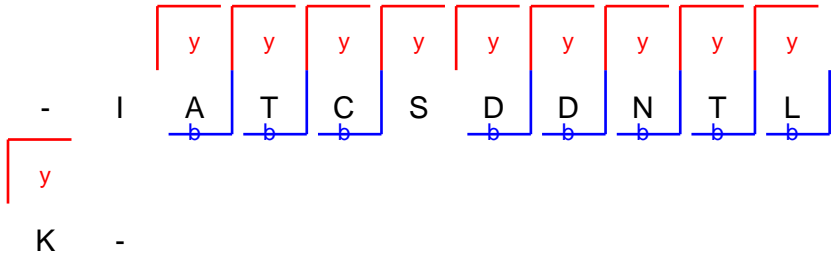

K -

RO-QC-160121\_ZackD\_SS\_Set\_02\_Fraction 16169 FTMS; HC 71.88 705.73 PQLC1

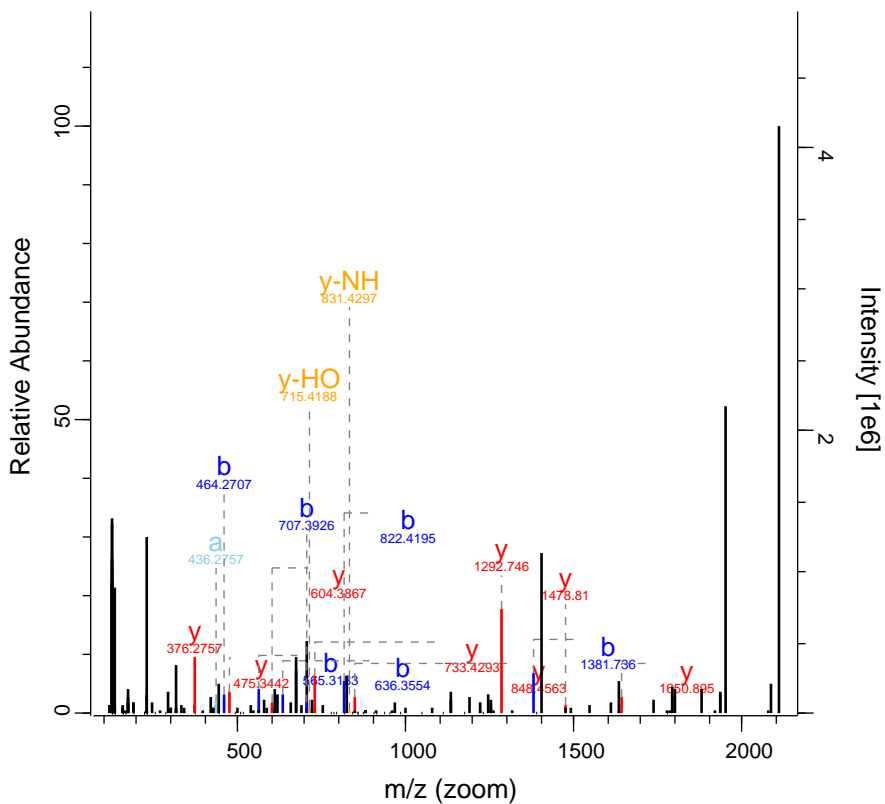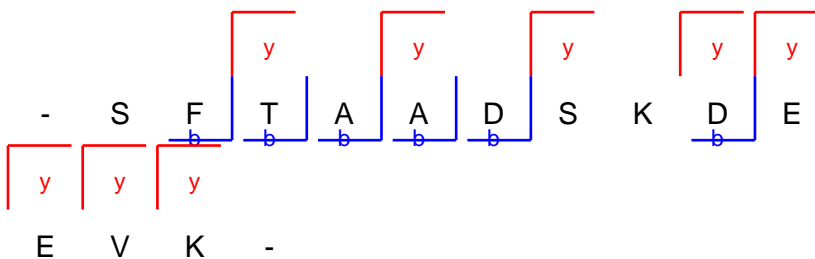

RO-QC-160121\_ZackD\_SS\_Set\_02\_Fractic 16218 FTMS; HC 114.86 1036.45 TOR1AIP2

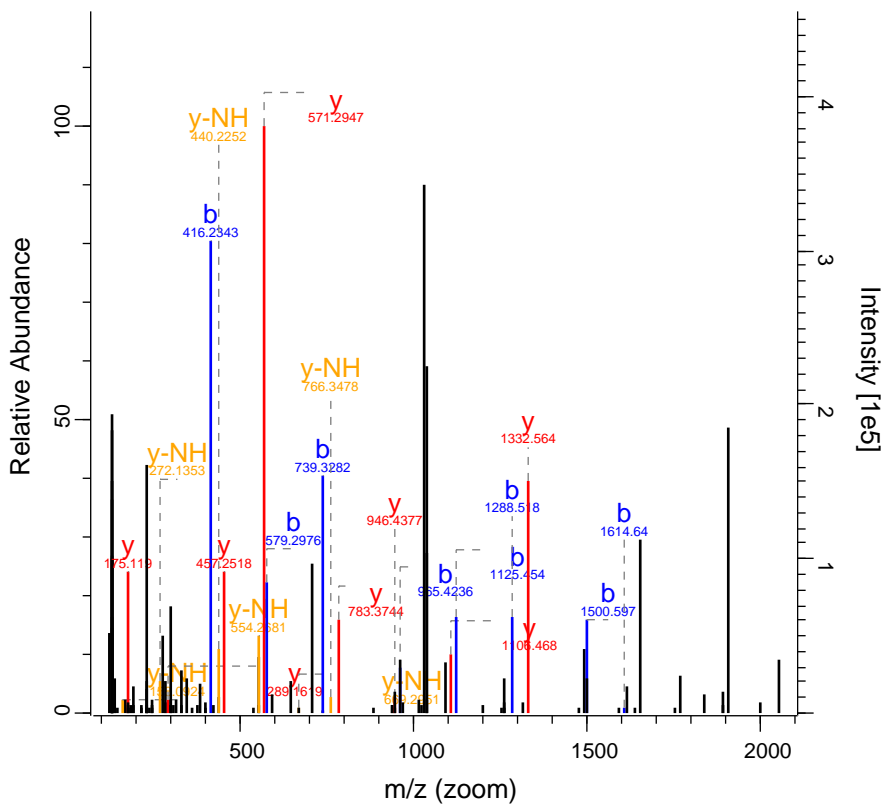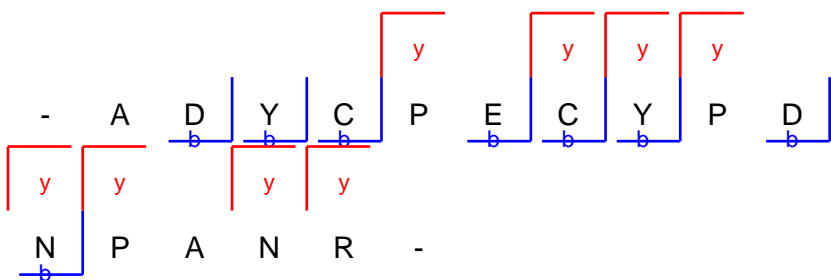

RO-QC-160121\_ZackD\_SS\_Set\_02\_Fraction 16787 FTMS; HC 83.44 707.38 MFSD1

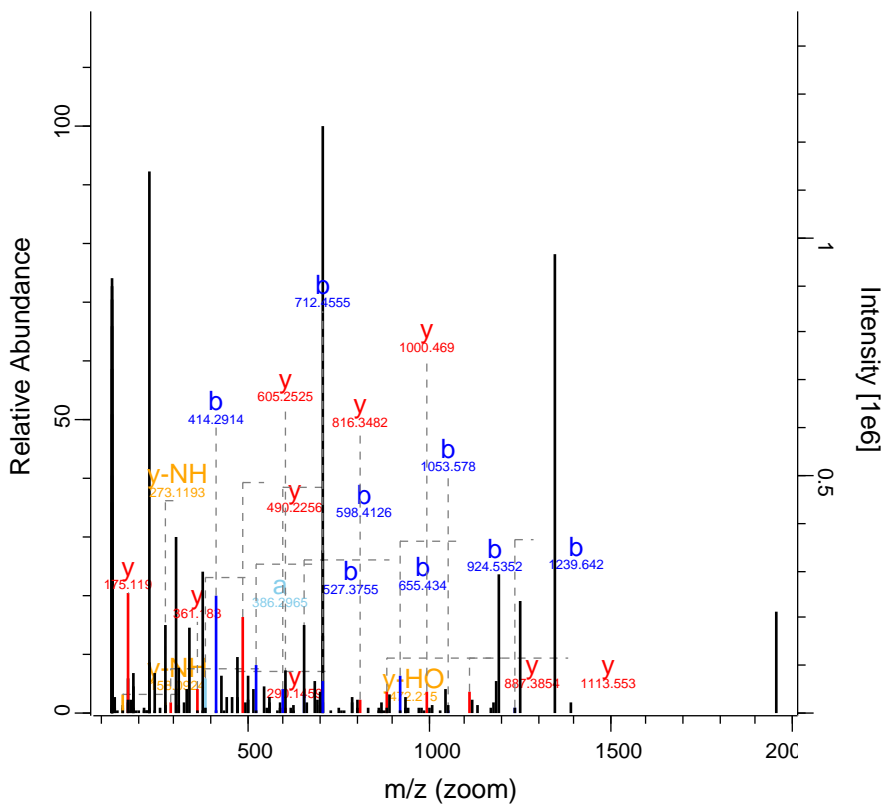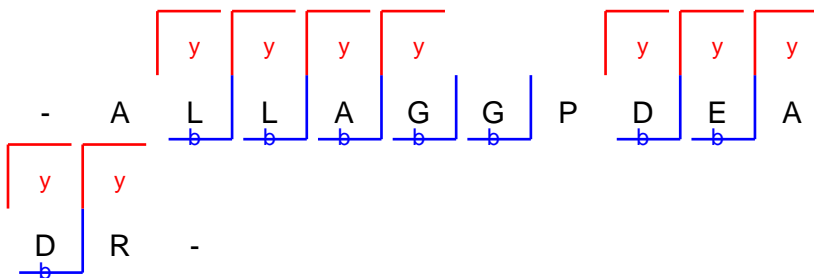

RO-QC-160121\_ZackD\_SS\_Set\_02\_Fractio 16996 FTMS; HC 130.98 707.38 MFSD1

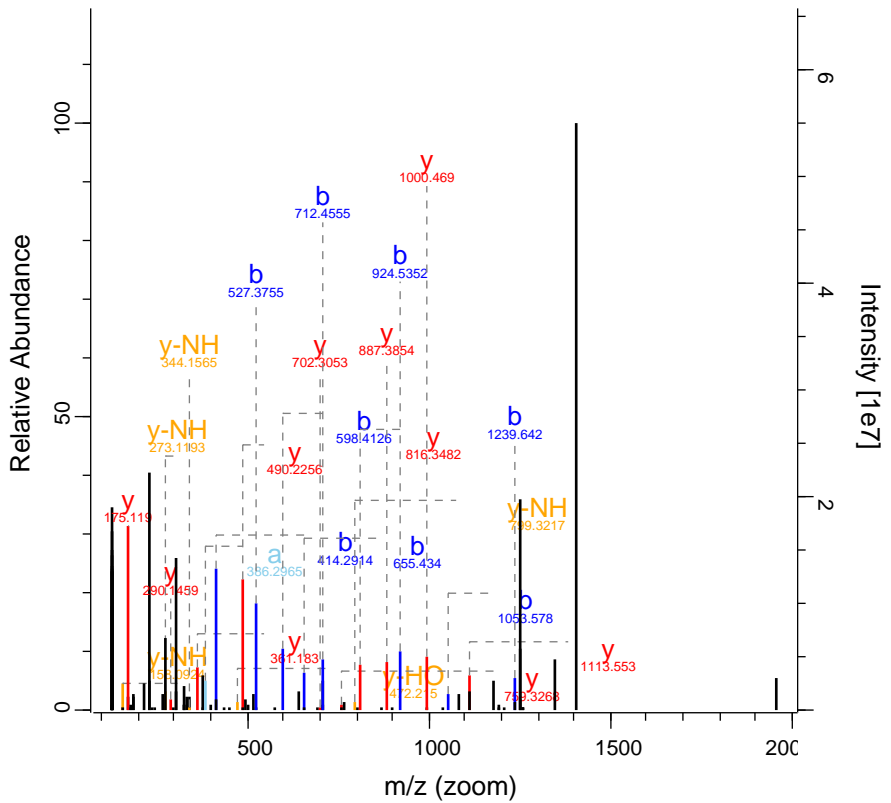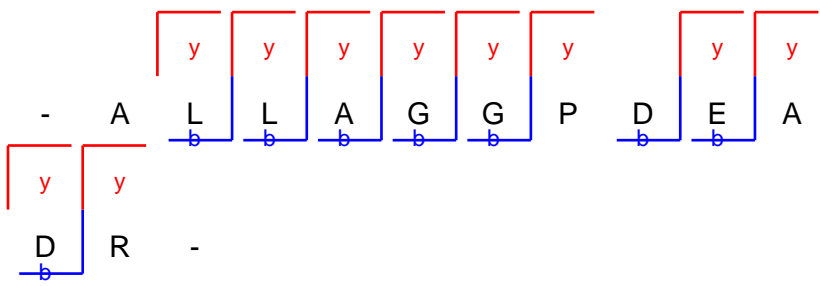

Raw File

Scan Method Score m/z

RO-QC-160121\_ZackD\_SS\_Set\_02\_Fraction\_3

17029 FTMS; HCD 87.31 718.92

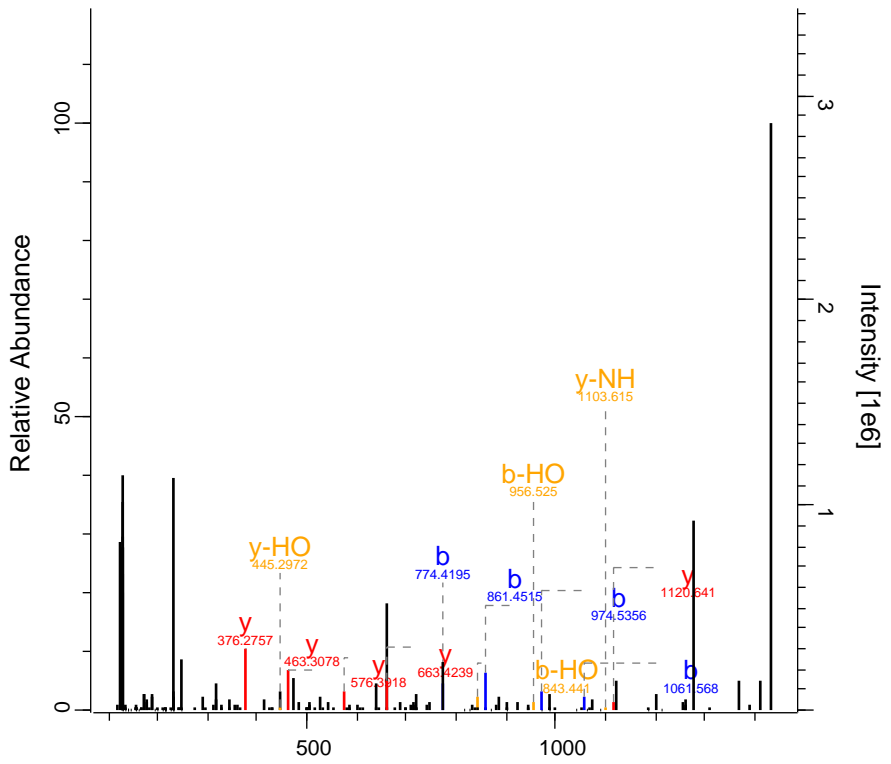

m/z (zoom)

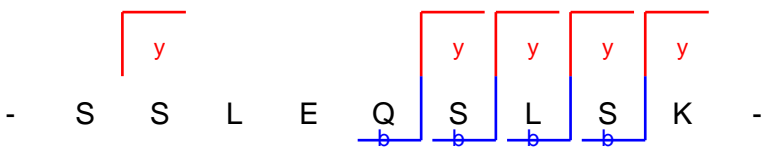

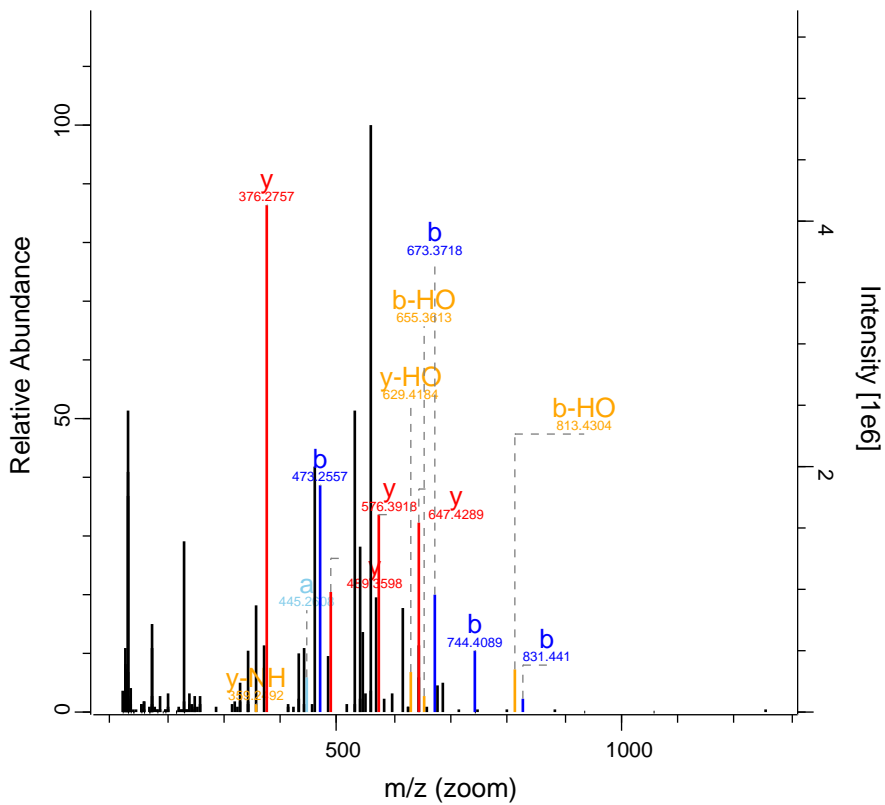

m/z (zoom)

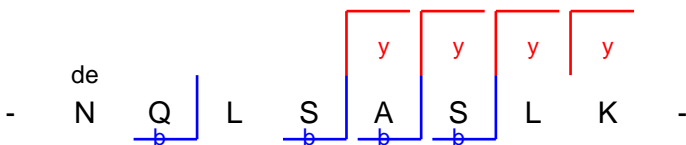





RO-QC-160121\_ZackD\_SS\_Set\_02\_Fractio 17559 FTMS; HC 109.48 752.09 CERS1

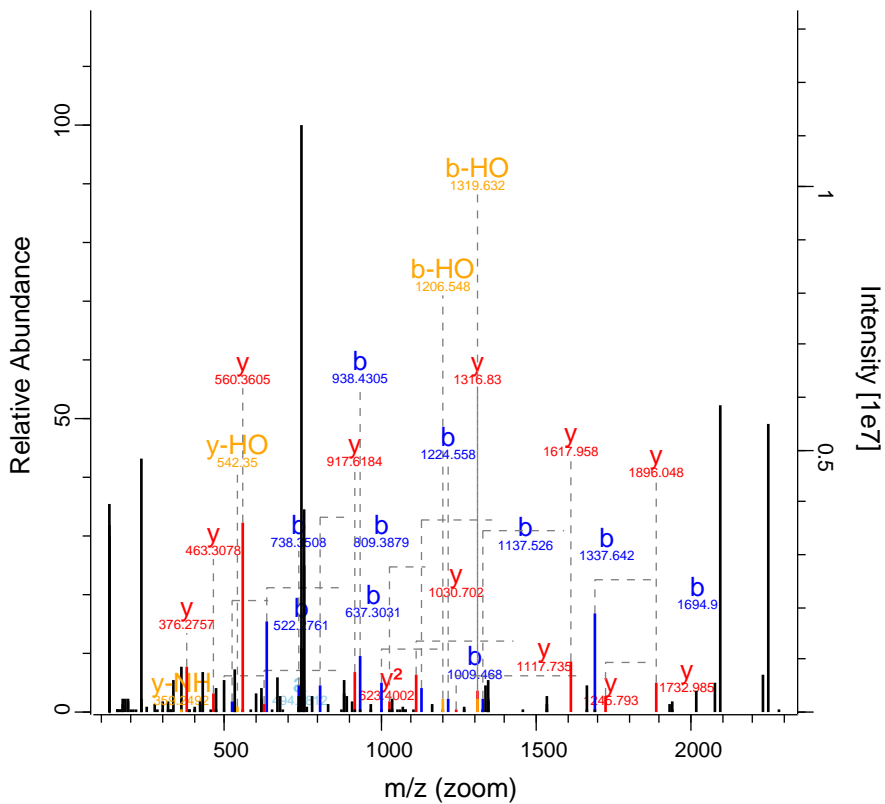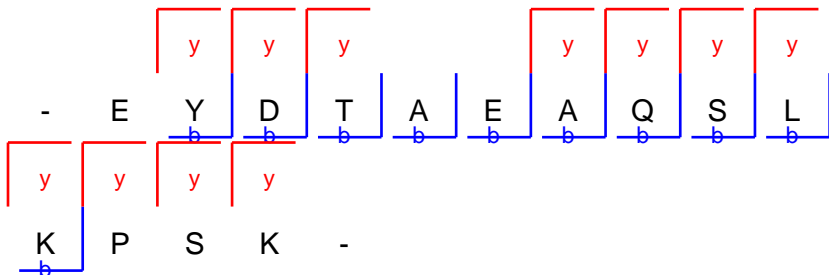

Raw File

Scan Method Score m/z

RO-QC-160121\_ZackD\_SS\_Set\_02\_Fraction\_3

18240 FTMS; HCD 67.56 745.38

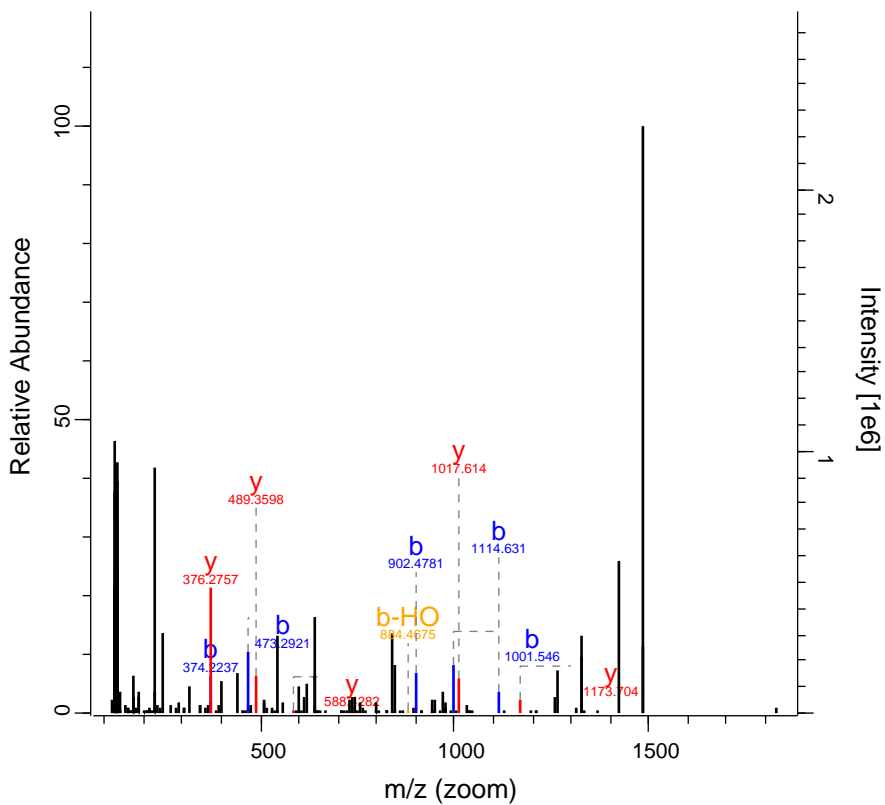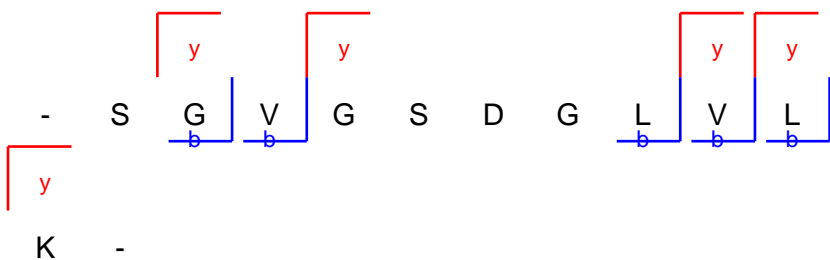

K -

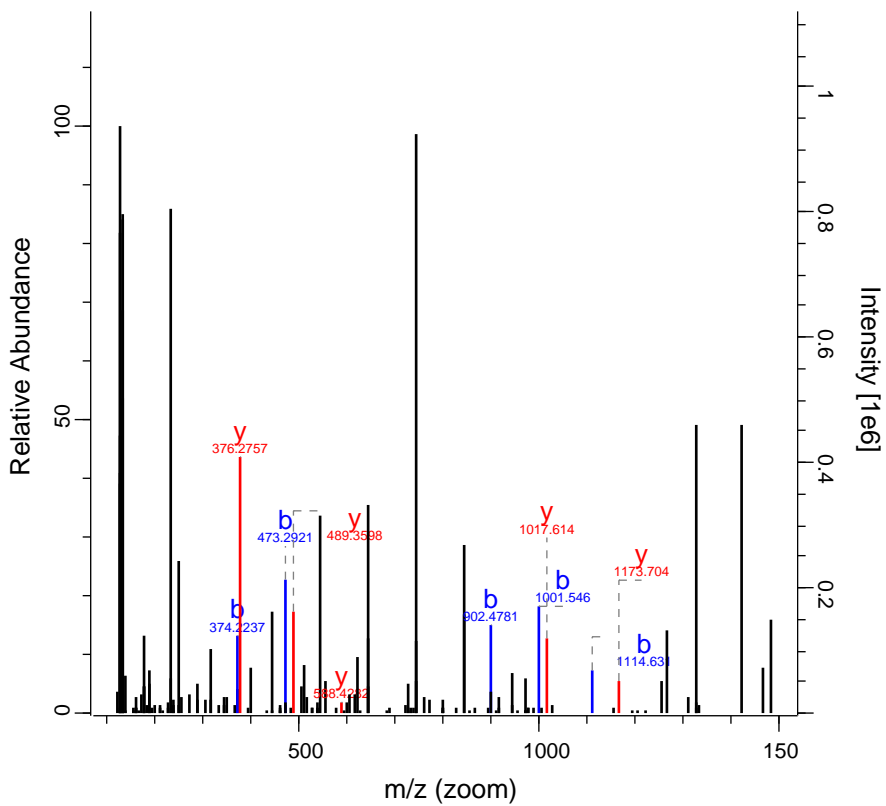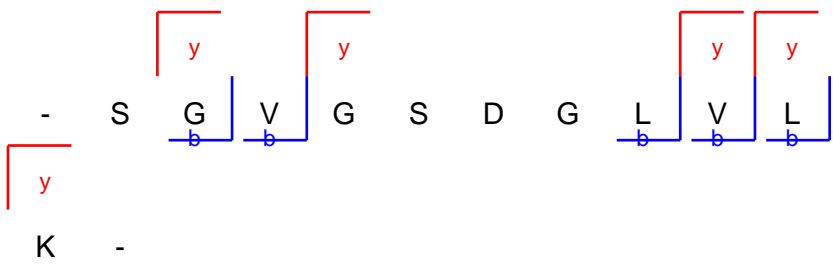

K -

RO-QC-160121\_ZackD\_SS\_Set\_02\_Fraction18337 FTMS; HC 118.5 452.58 HBB;HBD

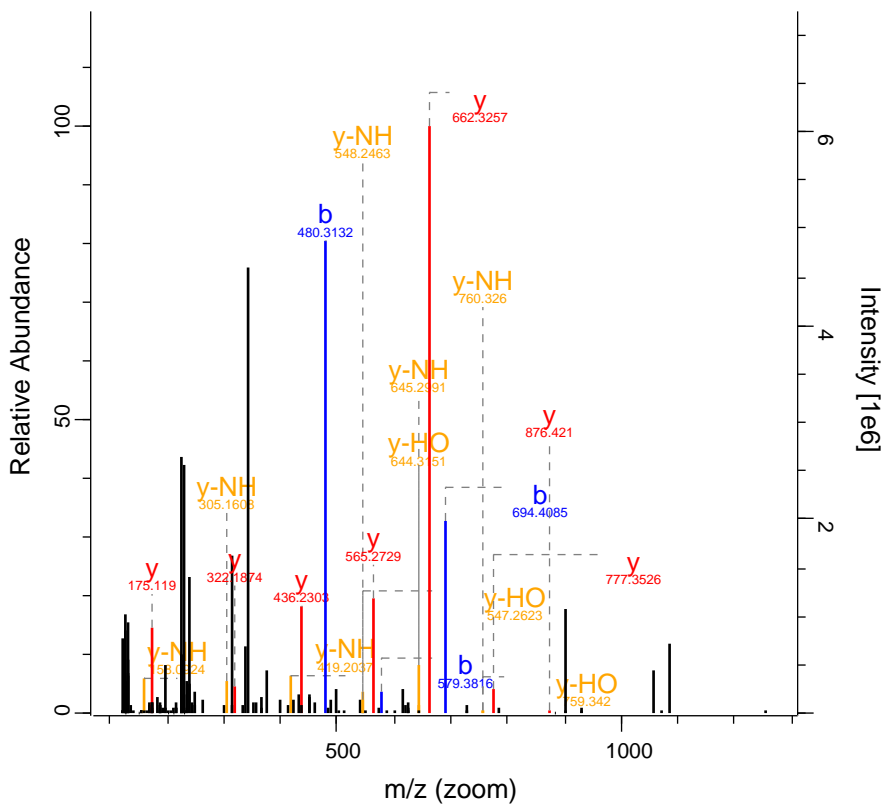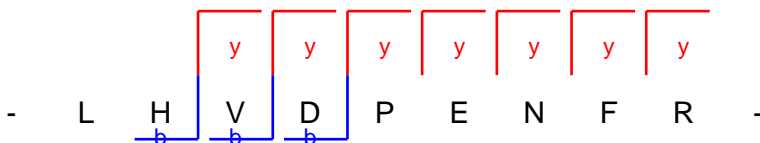

RO-QC-160121\_ZackD\_SS\_Set\_02\_Fraction18506 FTMS; HCl41.32 800.1 ATP6V0C

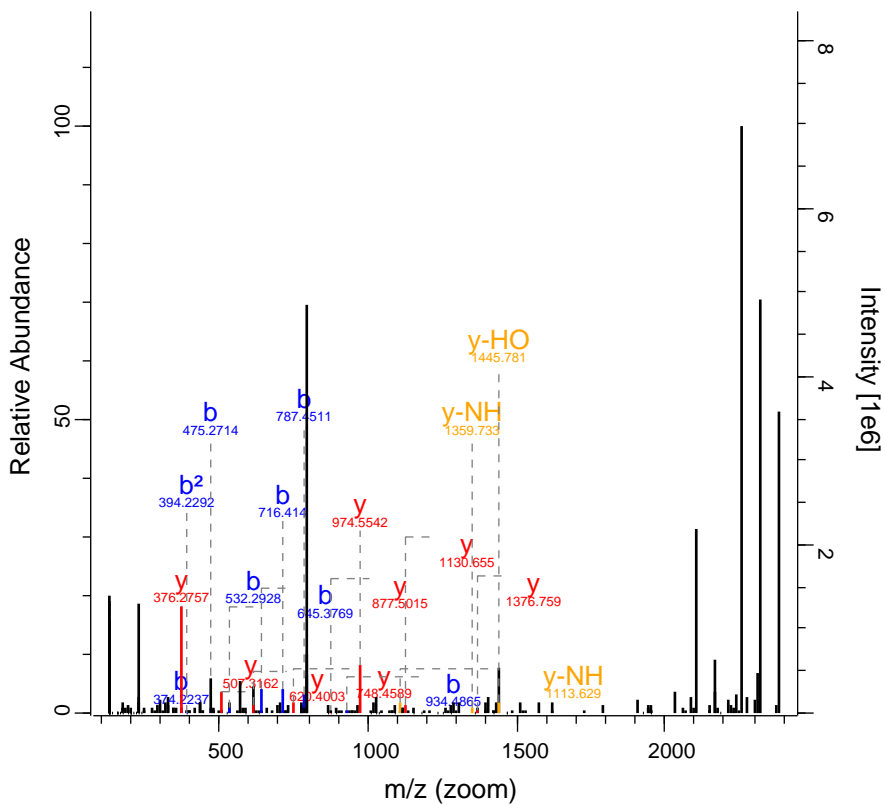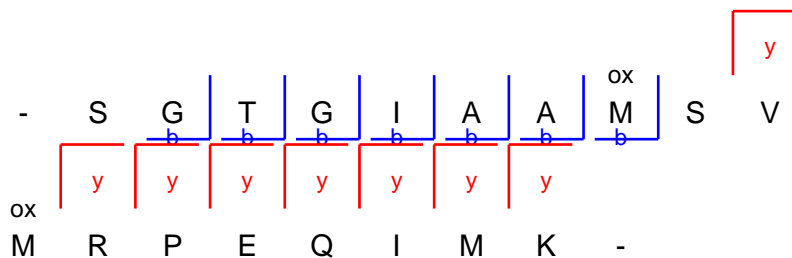

RO-QC-160121\_ZackD\_SS\_Set\_02\_Fraction 18679 FTMS; HCl 49.56 610.8 P115

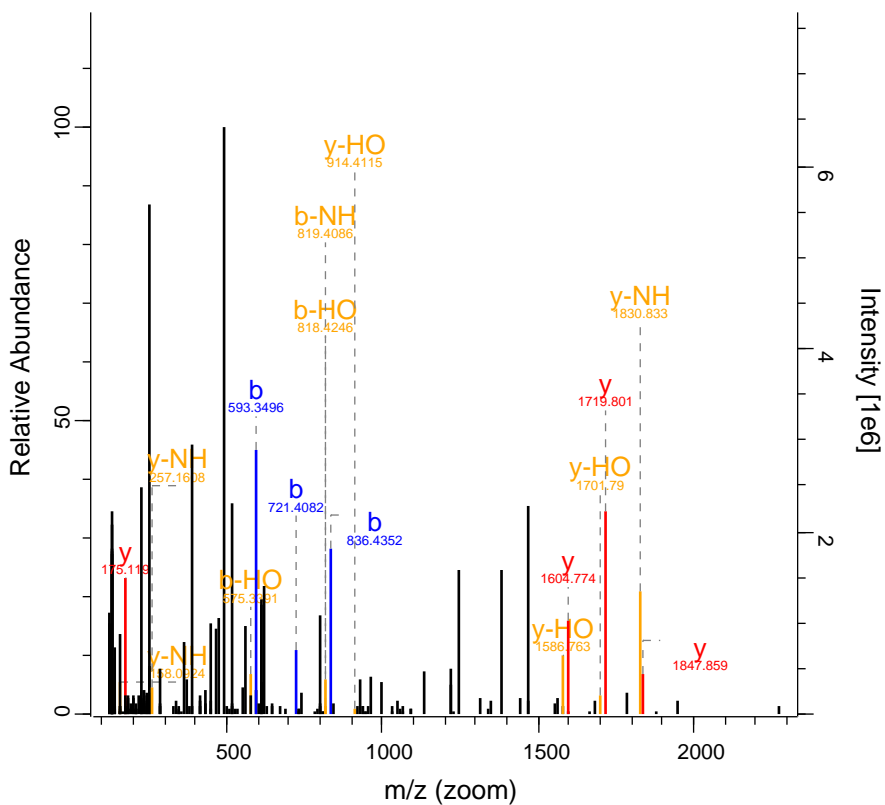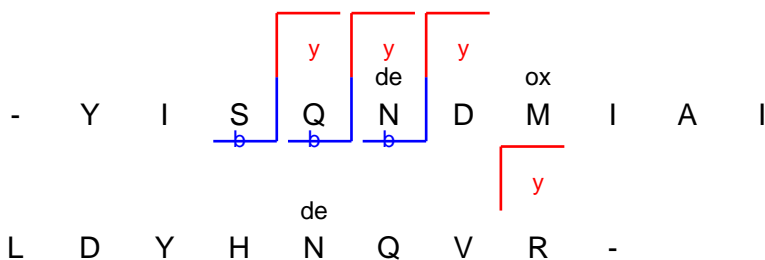

RO-QC-160121\_ZackD\_SS\_Set\_02\_Fraction 18734 FTMS; HCl50.05 800.1 ATP6V0C

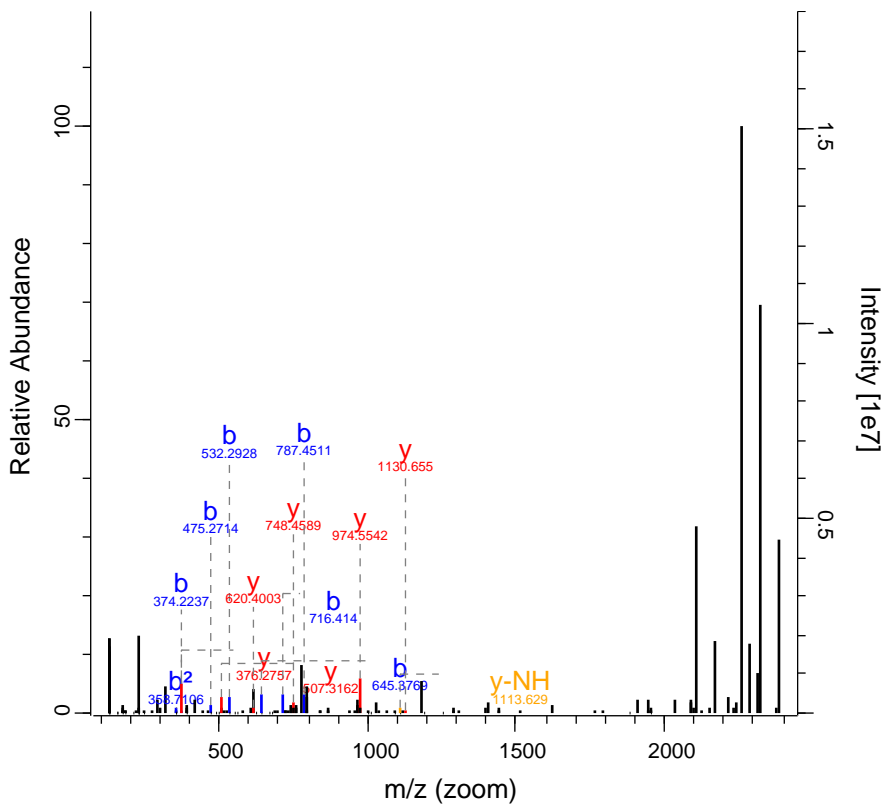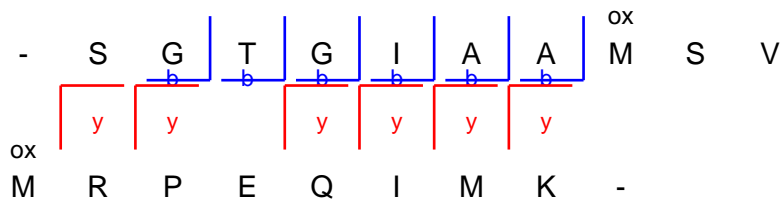





RO-QC-160121\_ZackD\_SS\_Set\_02\_Fratio 19209 FTMS; HC 159.73 912.78 SOD3

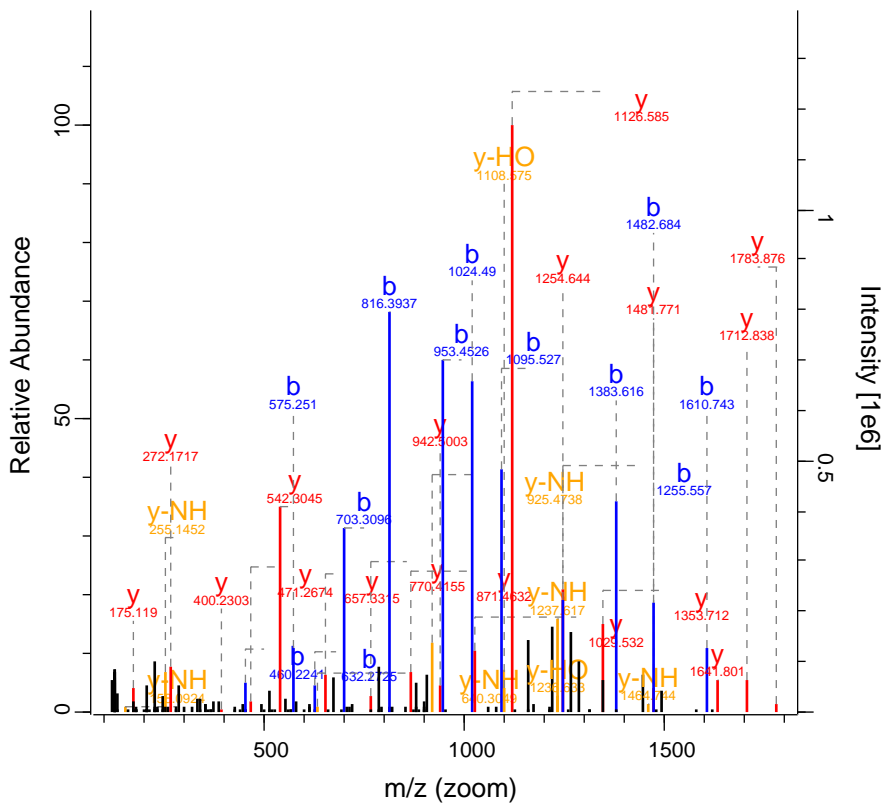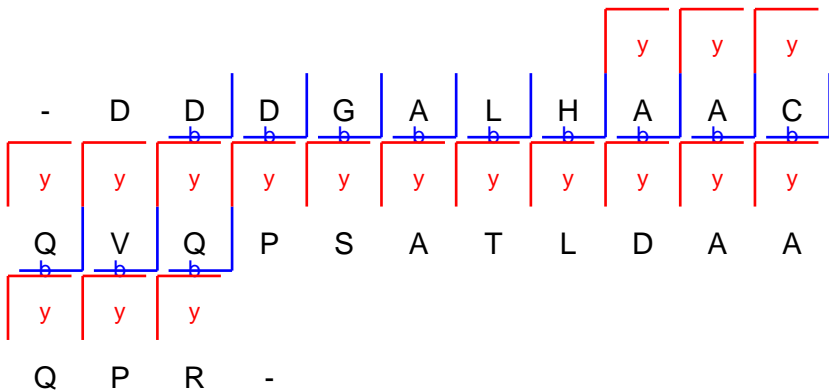

RO-QC-160121\_ZackD\_SS\_Set\_02\_Fraction 19217 FTMS; HC 62.06 913.45 SOD3

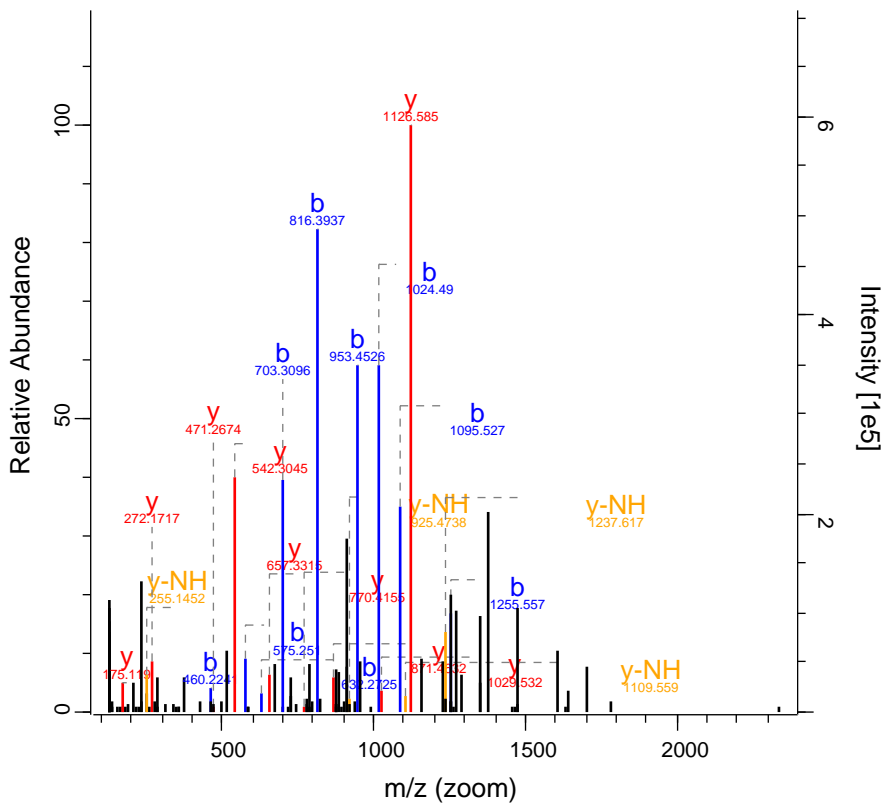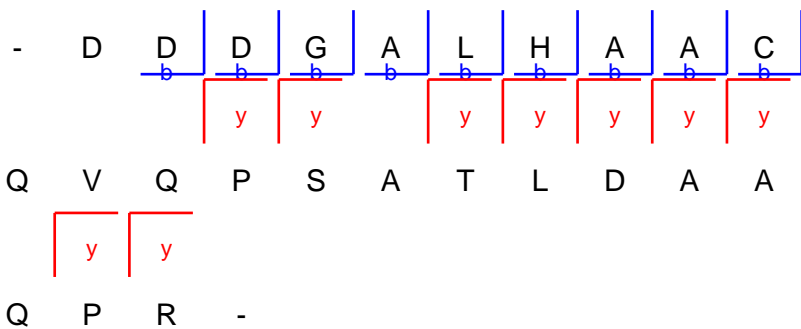

RO-QC-160121\_ZackD\_SS\_Set\_02\_Fraction19333 FTMS; HC 70.24 600.07 ATP6V0C

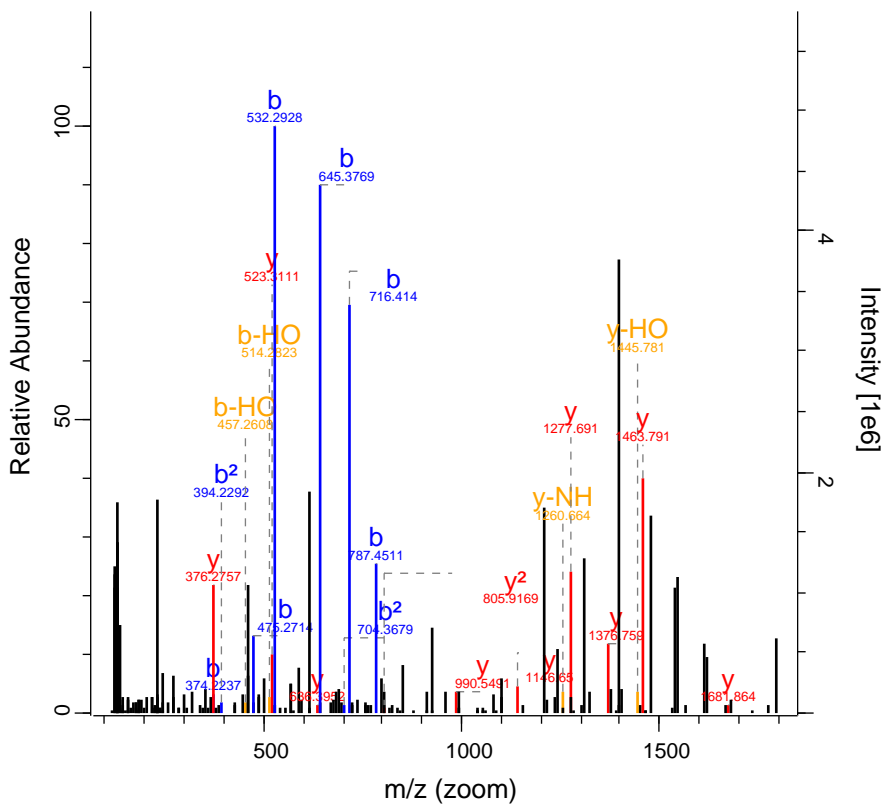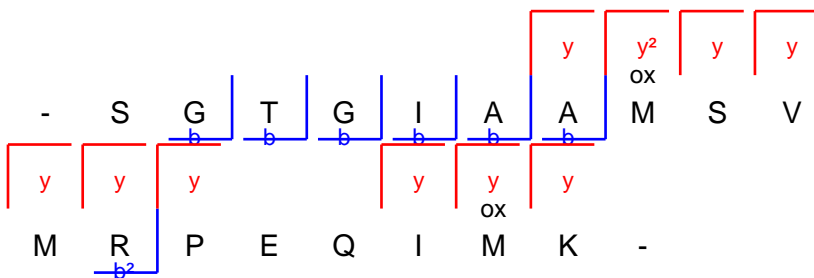

RO-QC-160121\_ZackD\_SS\_Set\_02\_Fraction 19473 FTMS; HC 50.95 508.95 PTX3

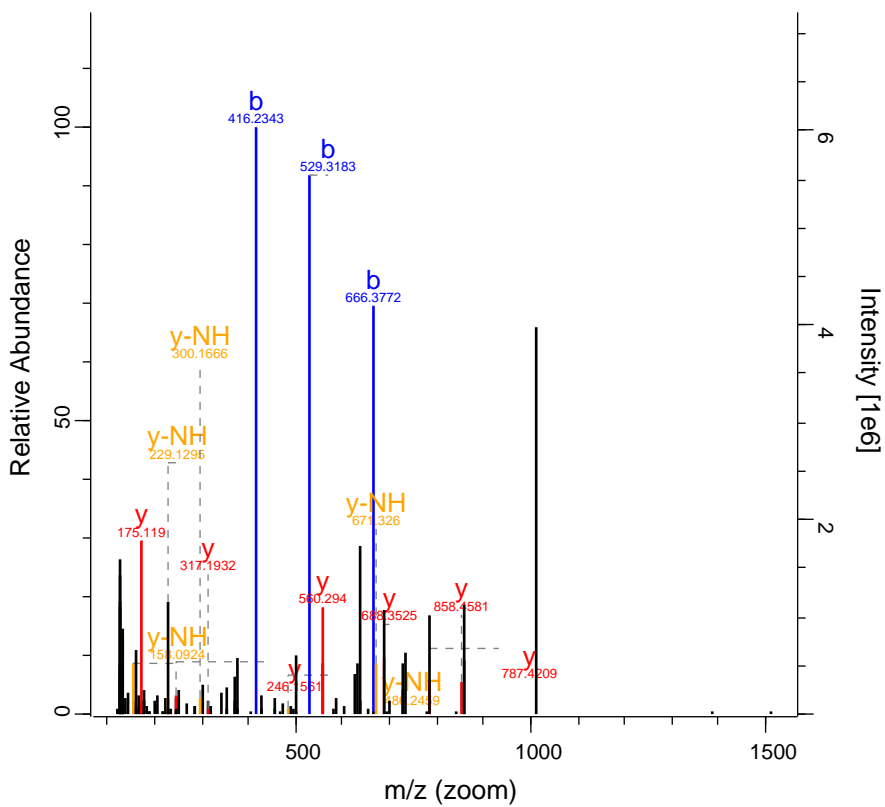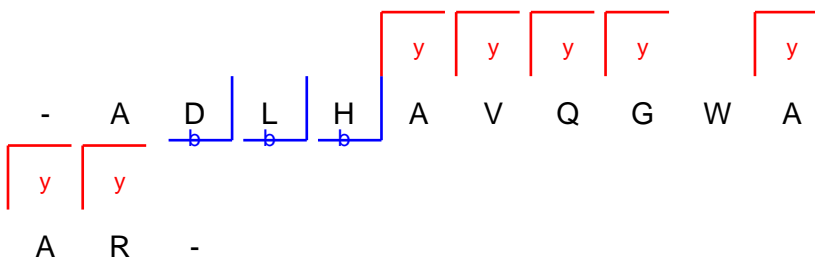

RO-QC-160121\_ZackD\_SS\_Set\_02\_Fraction 19597 FTMS; HC 73.02 794.45 TRPV5

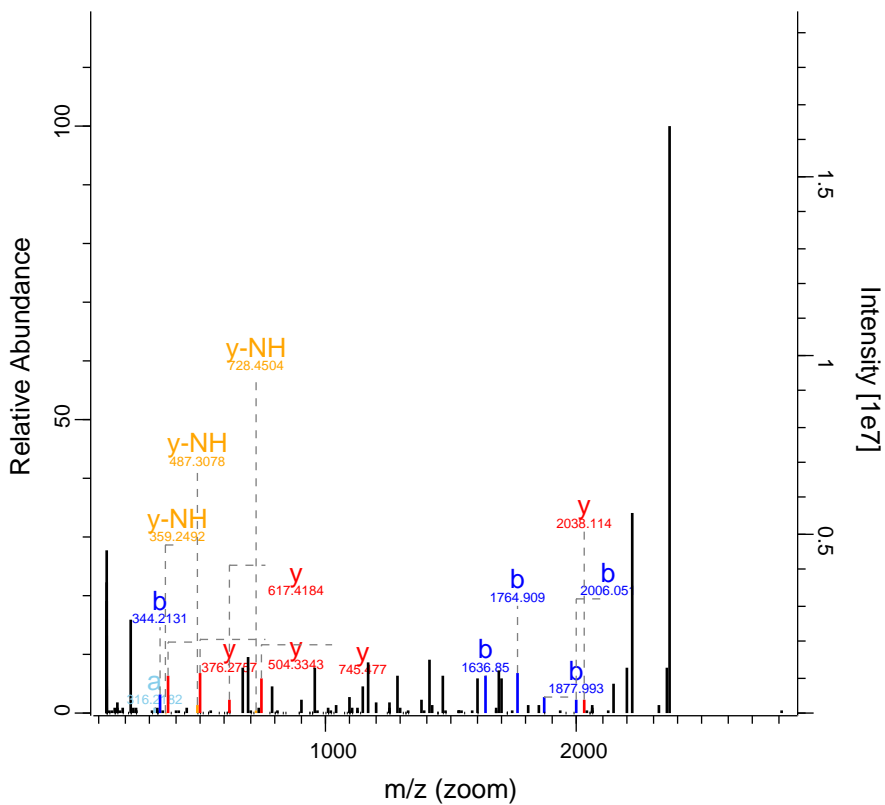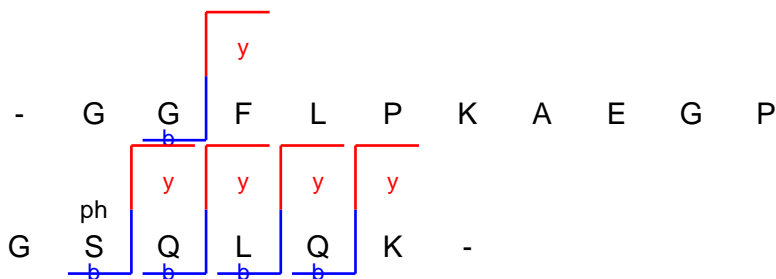

RO-QC-160121\_ZackD\_SS\_Set\_02\_Fractio 19706 FTMS; HC 141.95 781.46 PASK

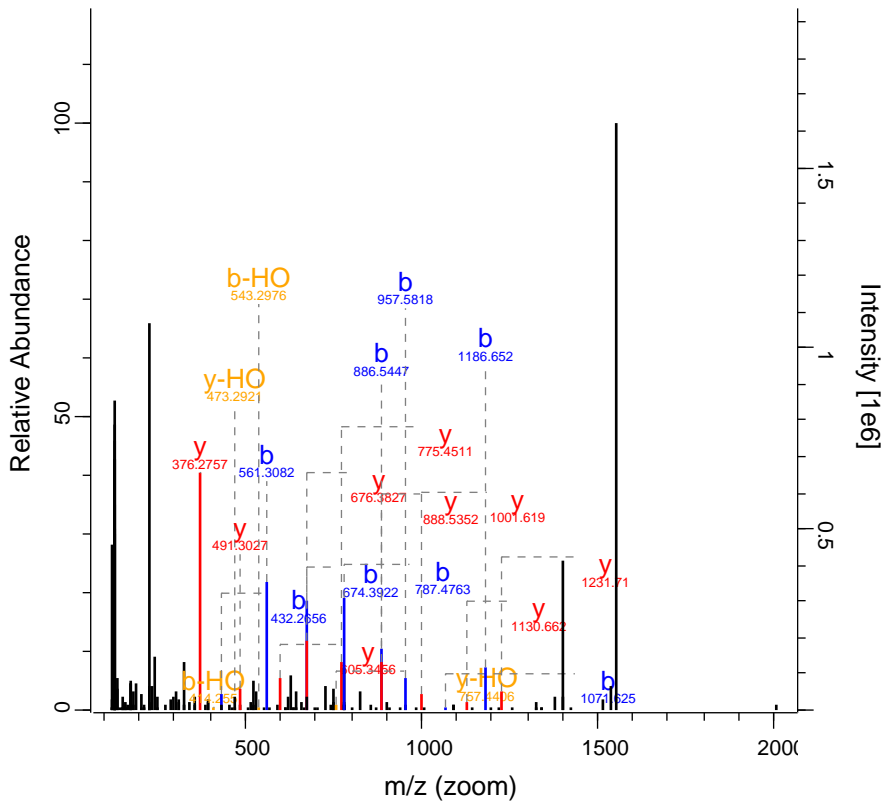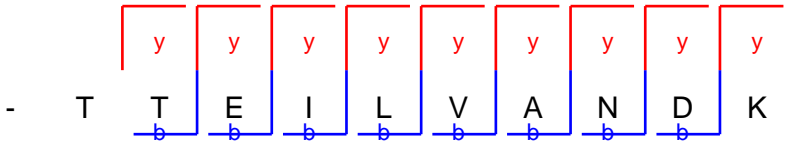

RO-QC-160121\_ZackD\_SS\_Set\_02\_Fraction 19931 FTMS; HC 51.88 498.63 SIPA1L2

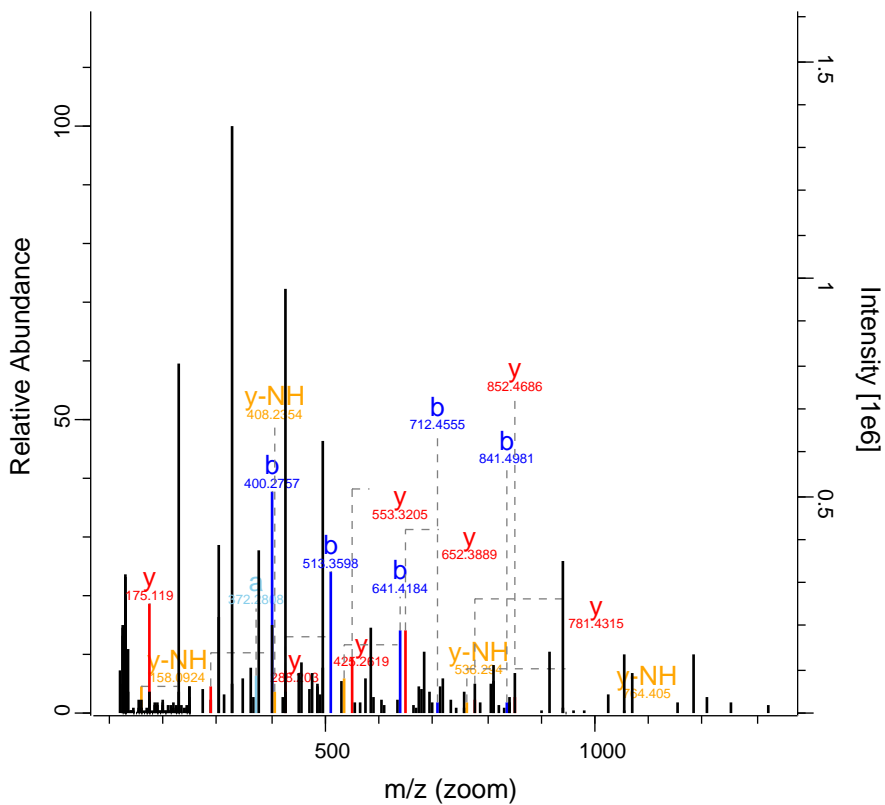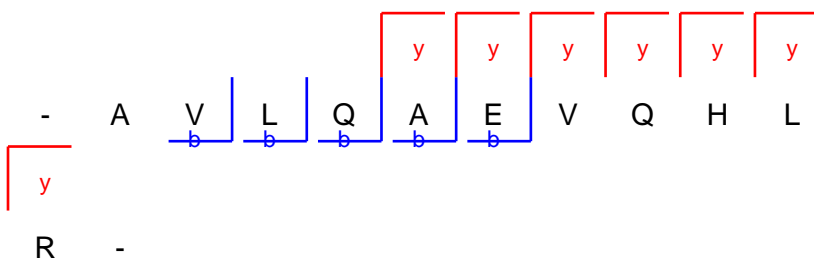

RO-QC-160121\_ZackD\_SS\_Set\_02\_Fraction 20246 FTMS; HC 47.75 796.66 OR51F2

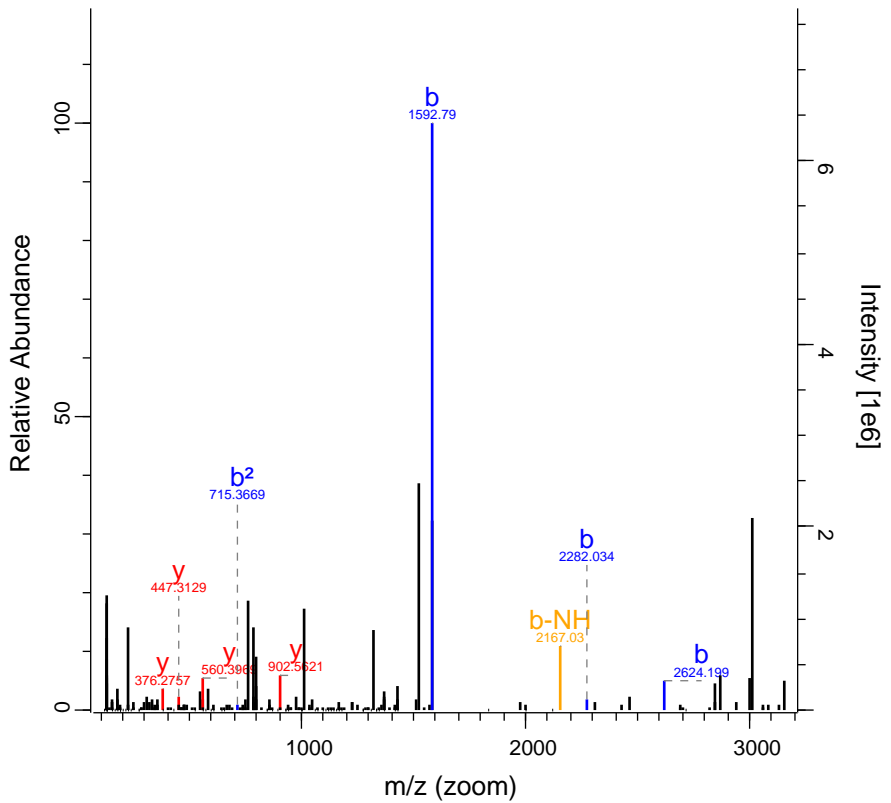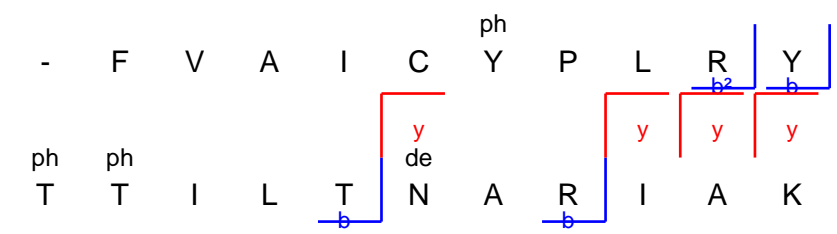



RO-QC-160121\_ZackD\_SS\_Set\_02\_Fraction 21104 FTMS; HCl 82.42 486.6 LATS2

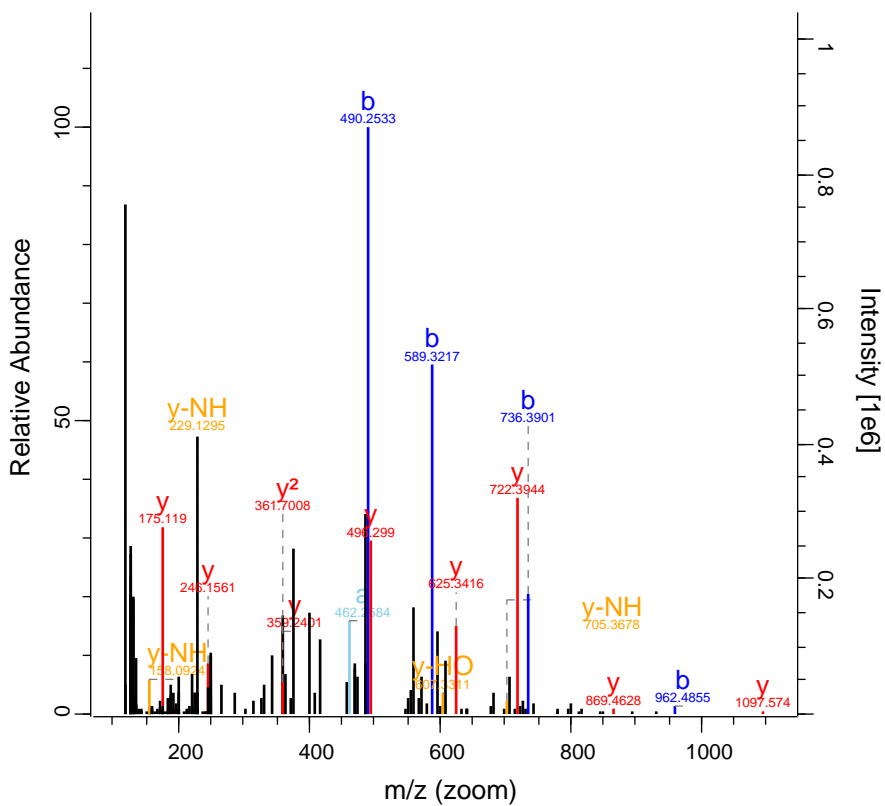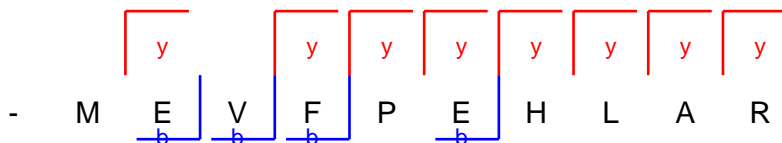

RO-QC-160121\_ZackD\_SS\_Set\_02\_Fraccio21254 FTMS; HC 101.35 714.38 ZCCHC4

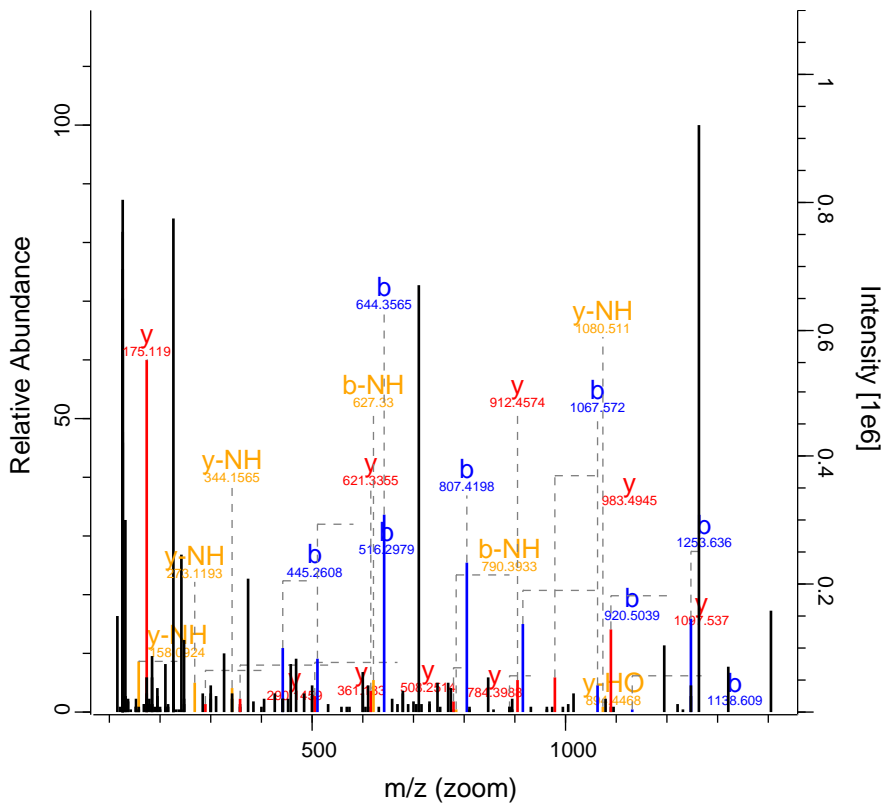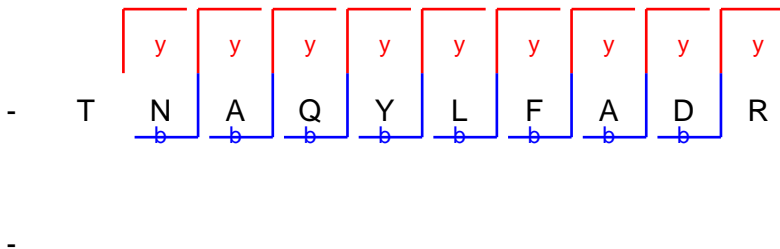

RO-QC-160121\_ZackD\_SS\_Set\_02\_Fraccio 21681 FTMS; HC 148.78 926.52 EPN2

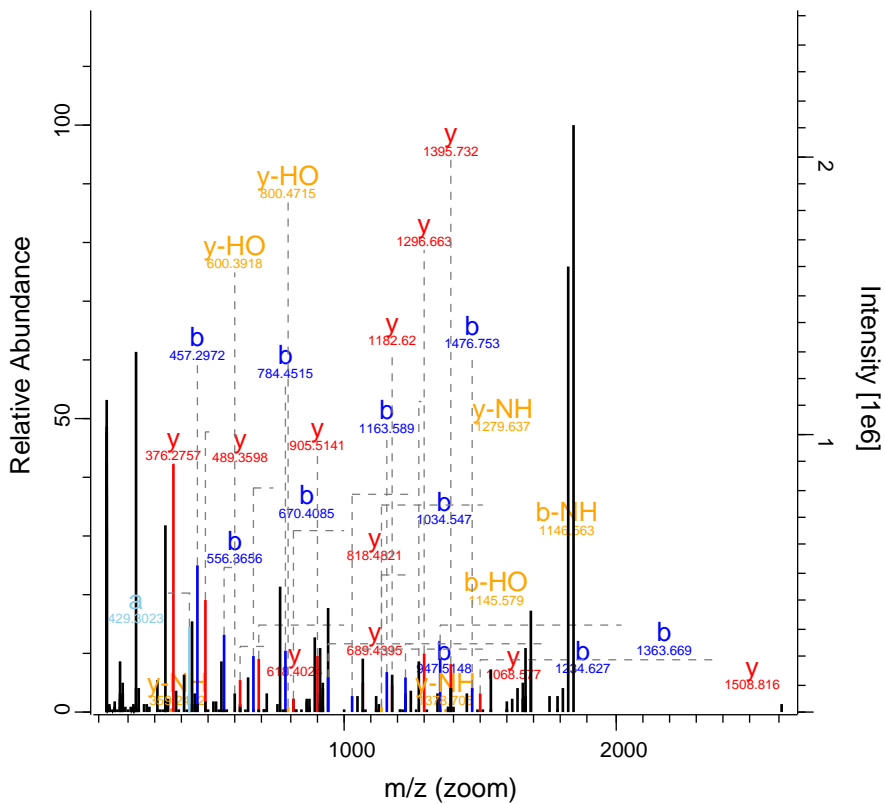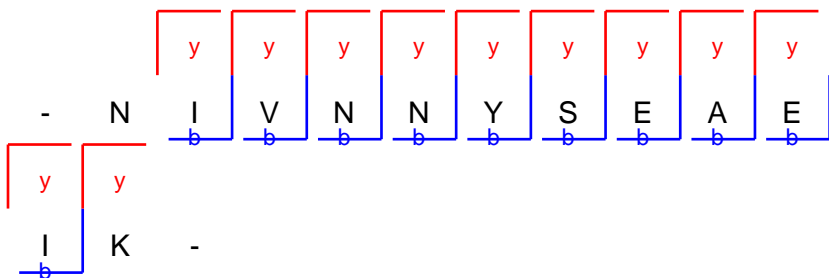

RO-QC-160121\_ZackD\_SS\_Set\_02\_Fraction 22106 FTMS; HCl 108.98 689.9 CDC45

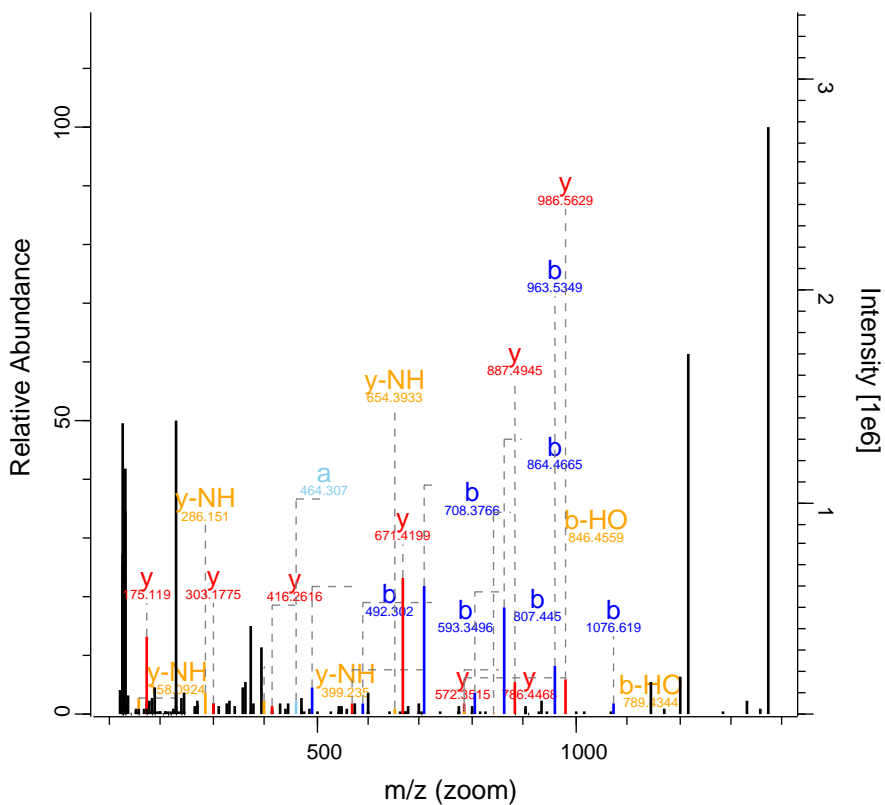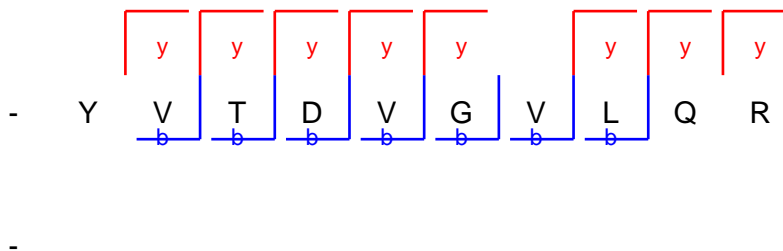

RO-QC-160121\_ZackD\_SS\_Set\_02\_Fraction 22485 FTMS; HC 86.6 918.45 MRFPAP1

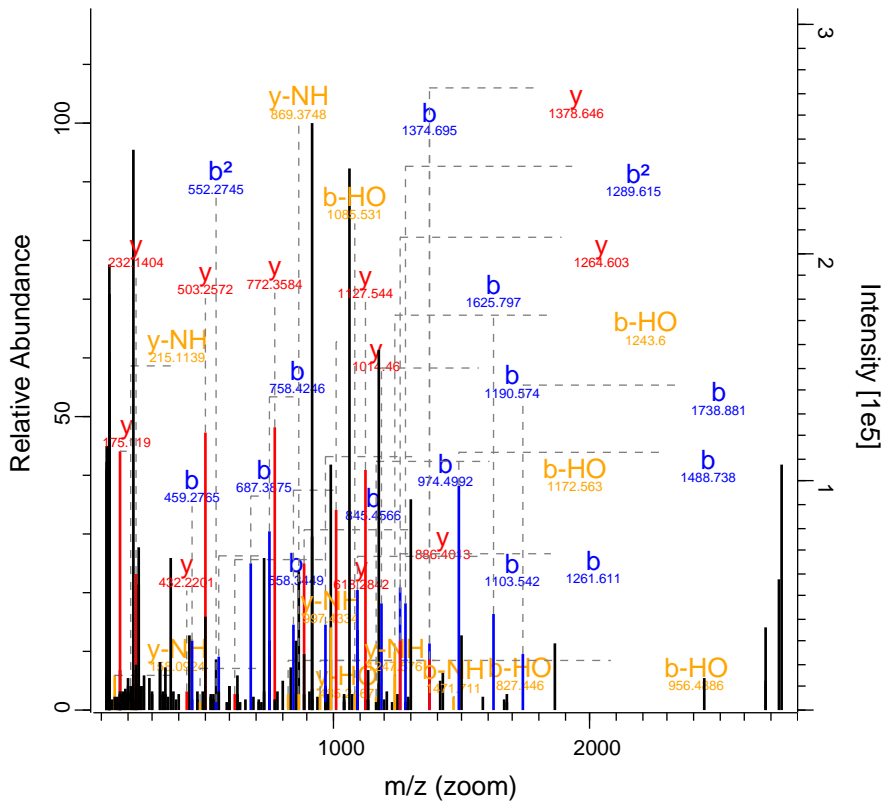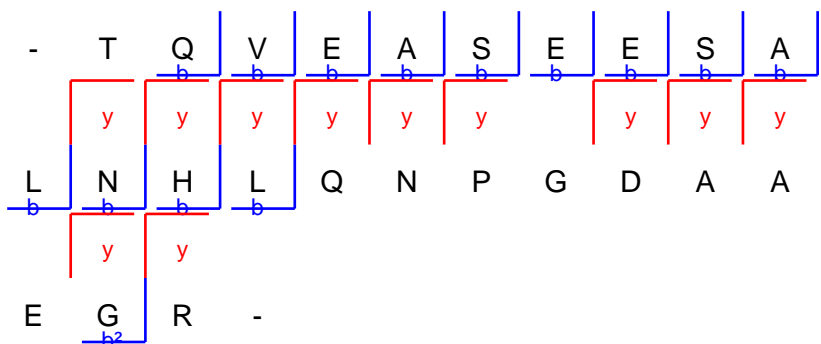



RO-QC-160121\_ZackD\_SS\_Set\_02\_Fraction 22965 FTMS; HCl 101.64 829 TRDC

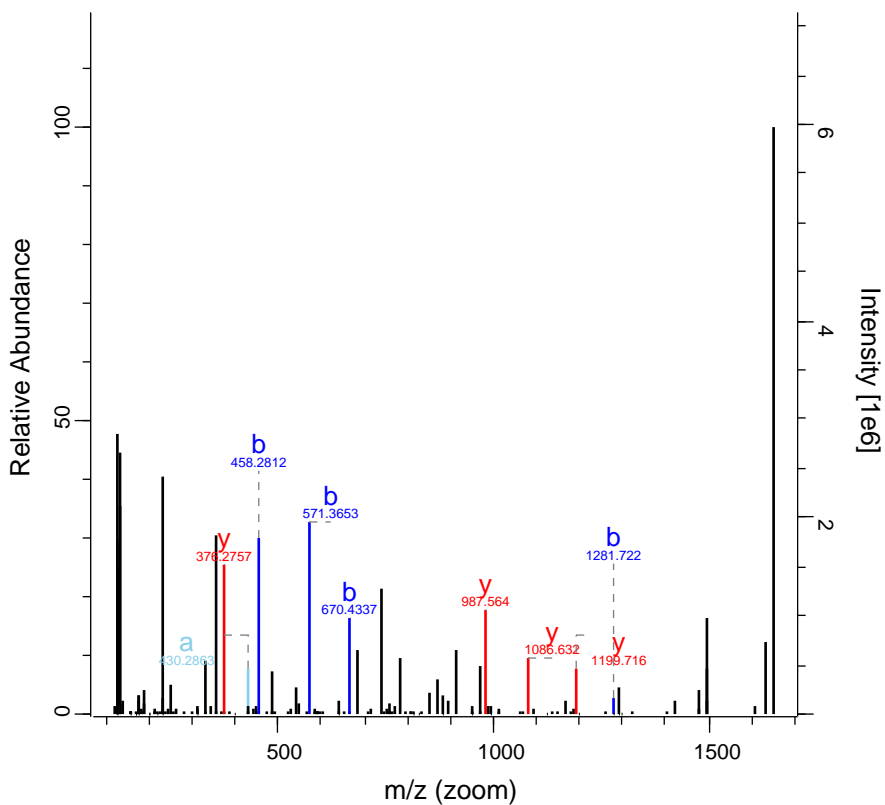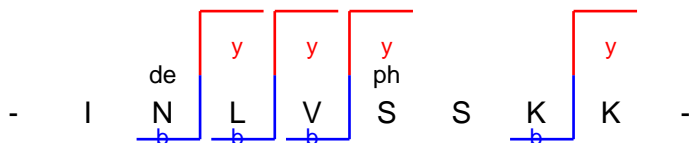

RO-QC-160121\_ZackD\_SS\_Set\_02\_Fractio 23001 FTMS; HC 219.42 975.05 TRDMT1

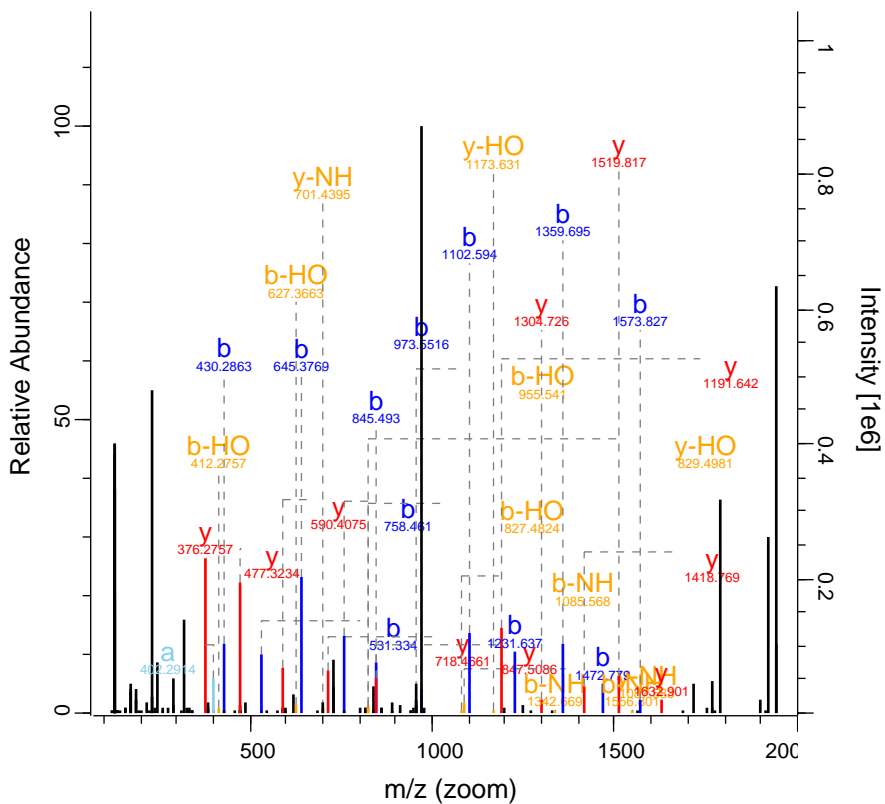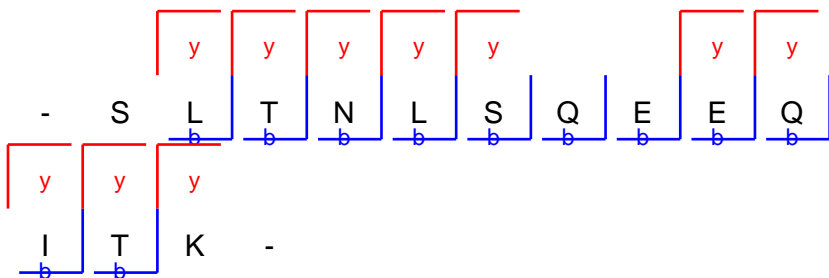



RO-QC-160121\_ZackD\_SS\_Set\_02\_Fractio 23086 FTMS; HC 135.56 873.01 PGAP2

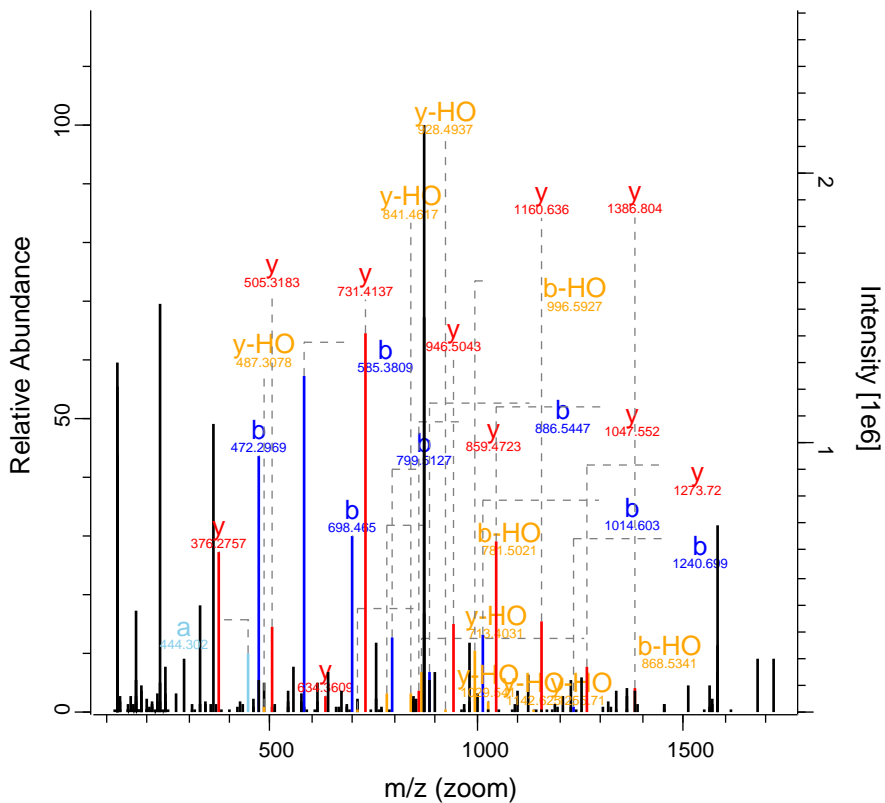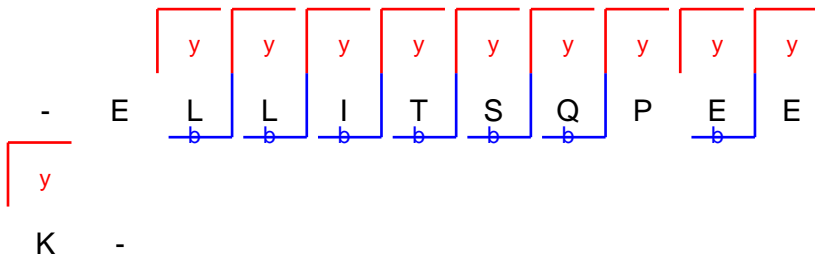

K

RO-QC-160121\_ZackD\_SS\_Set\_02\_Fraction 23788 FTMS; HC 61.96 473.62 CD14

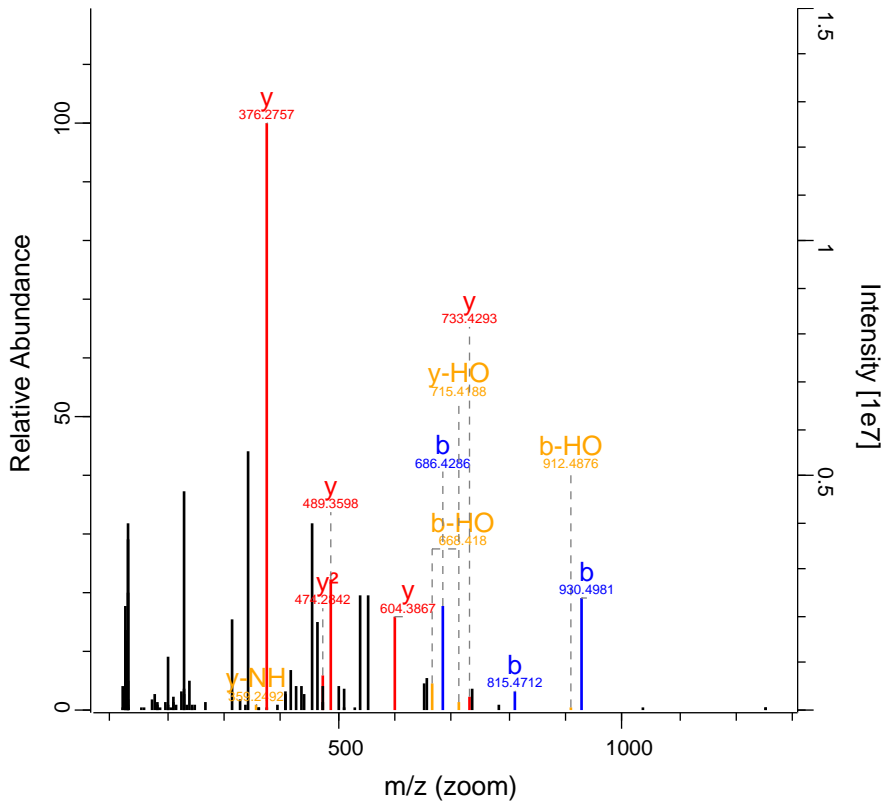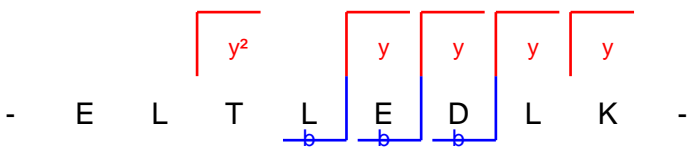

RO-QC-160121\_ZackD\_SS\_Set\_02\_Fraction 24023 FTMS; HC 81.19 473.62 CD14

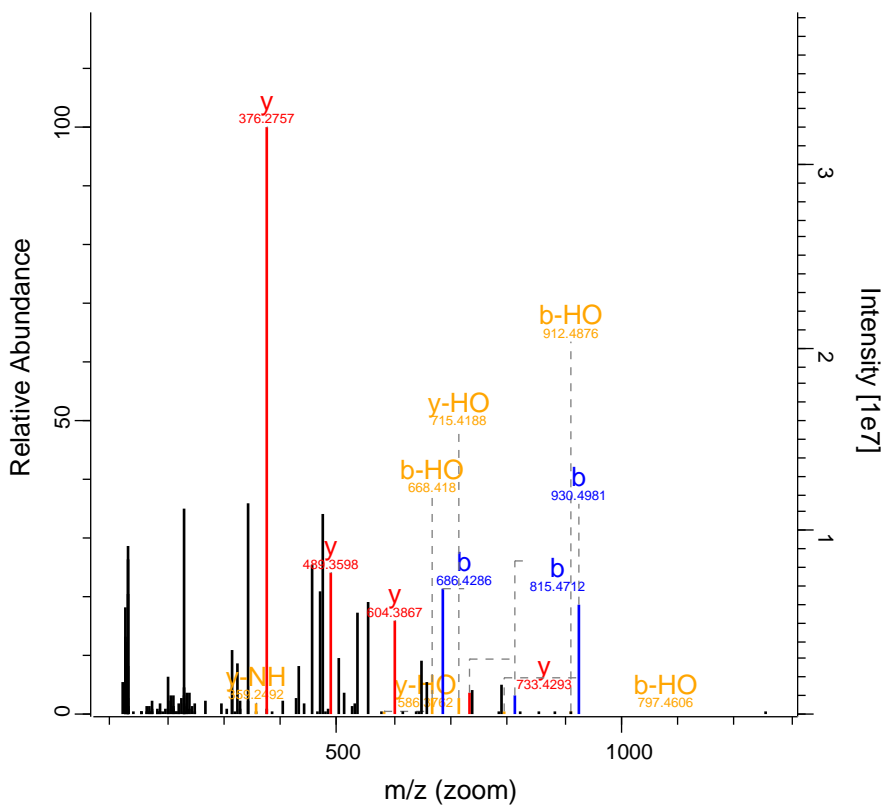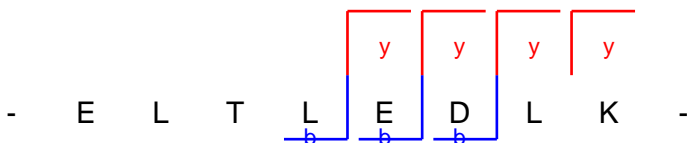

RO-QC-160121\_ZackD\_SS\_Set\_02\_Fraction 24124 FTMS; HC 42.56 739.04 TRPM6

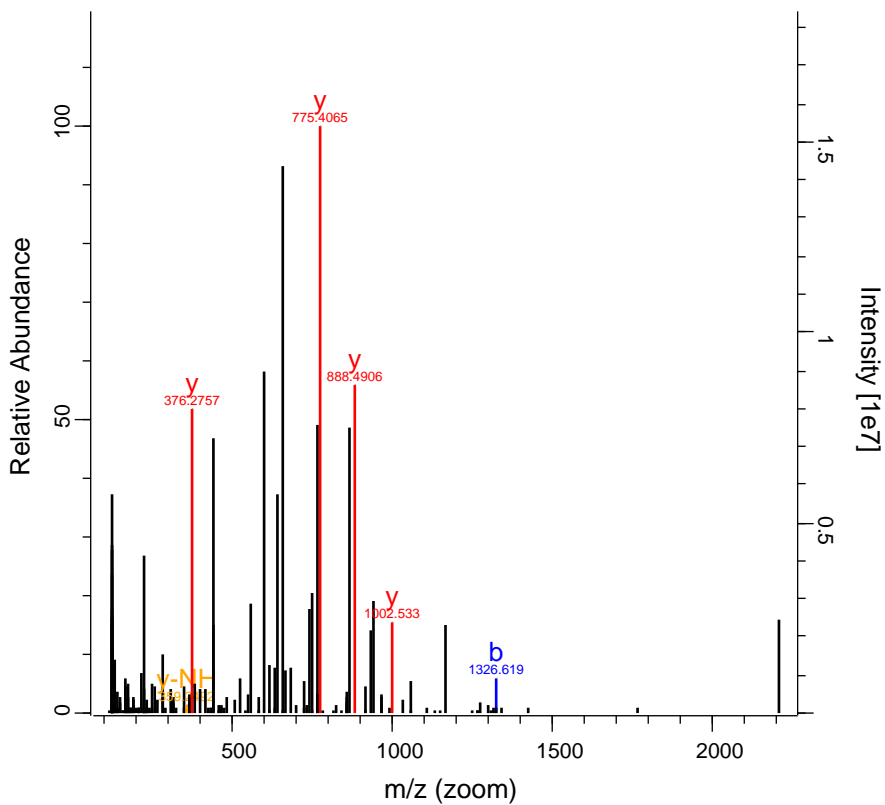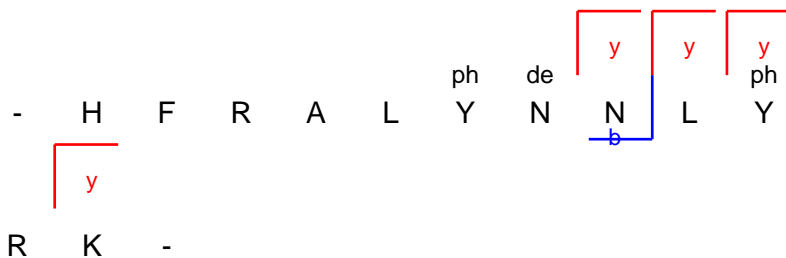

RO-QC-160121\_ZackD\_SS\_Set\_02\_Fractio 24129 FTMS; HC 105.52 514.26 APOBEC3B

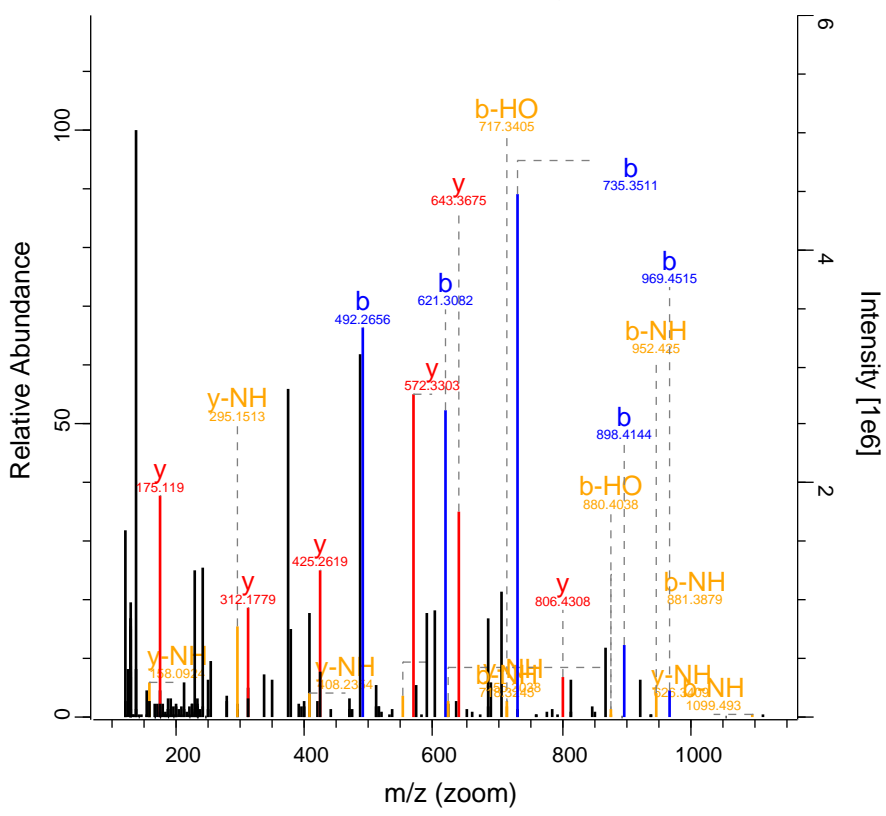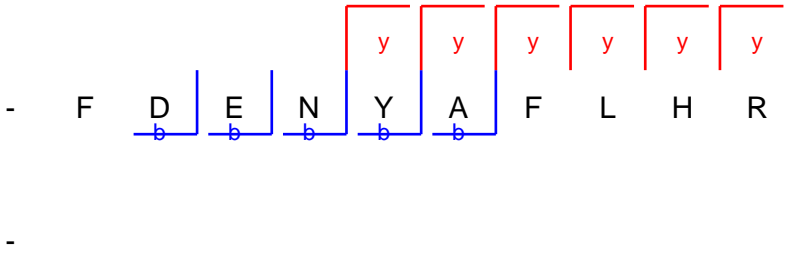

RO-QC-160121\_ZackD\_SS\_Set\_02\_Fraction 24195 FTMS; HC 76.33 916.03 PRRX1

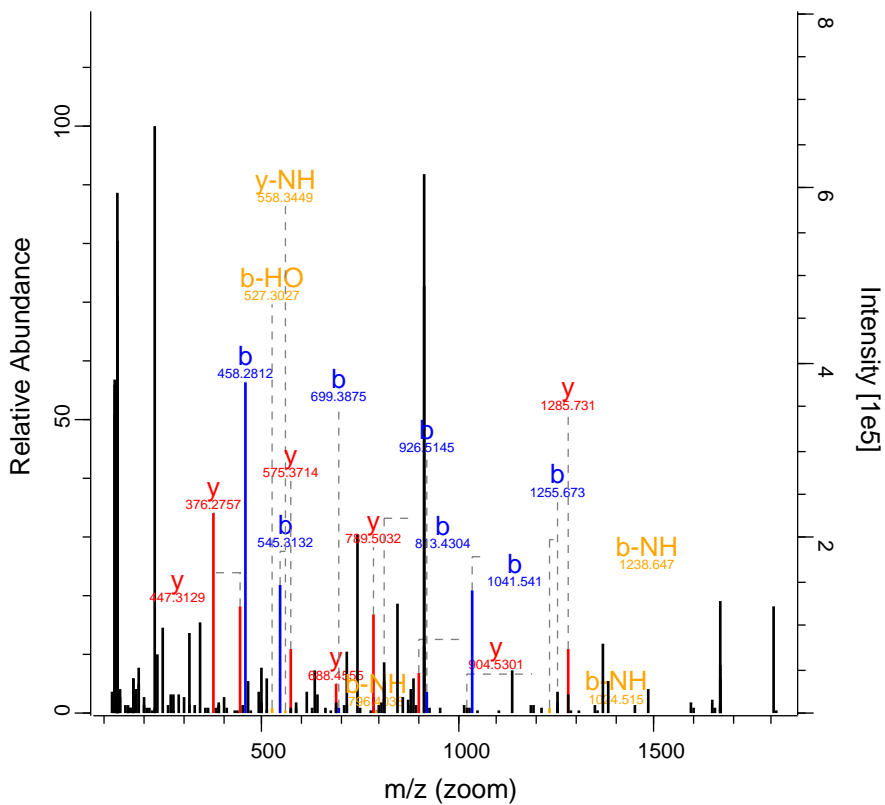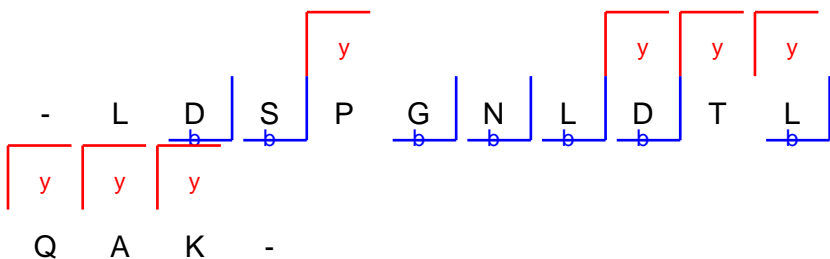

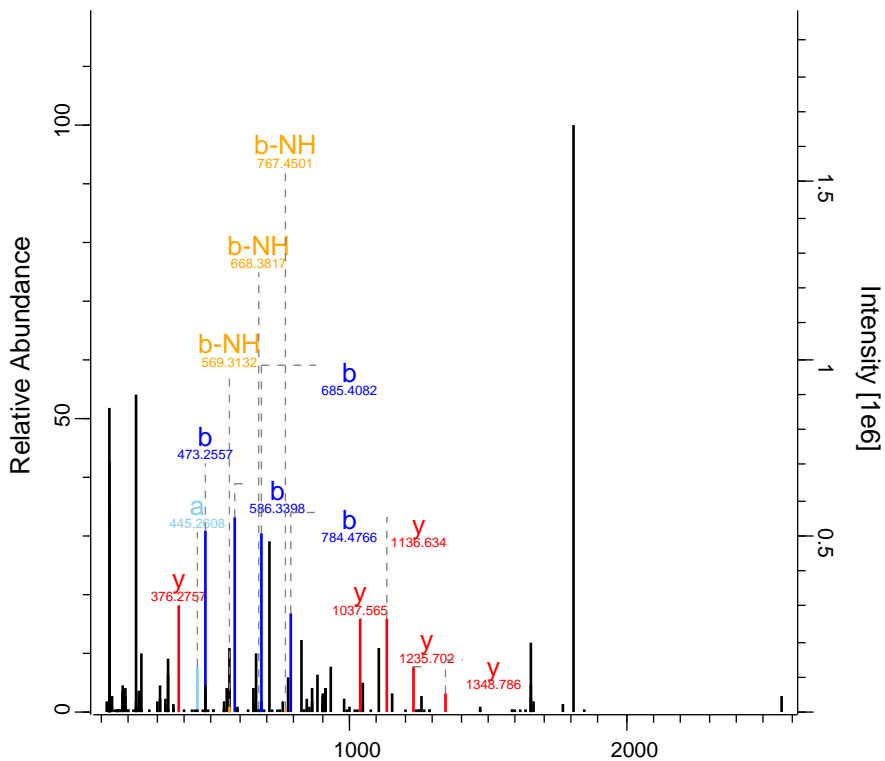

m/z (zoom)

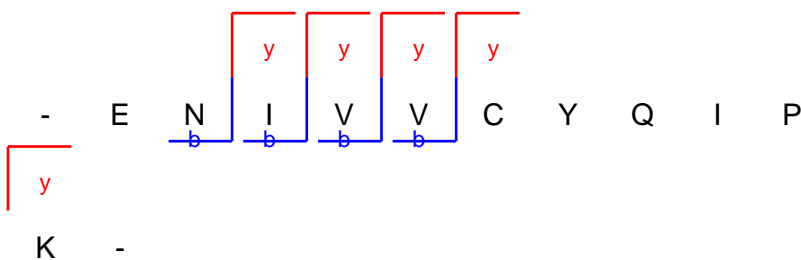

K -

Raw File

Scan Method Score m/z

RO-QC-160121\_ZackD\_SS\_Set\_02\_Fraction\_3

24327 FTMS; HCD 42.56 607.68

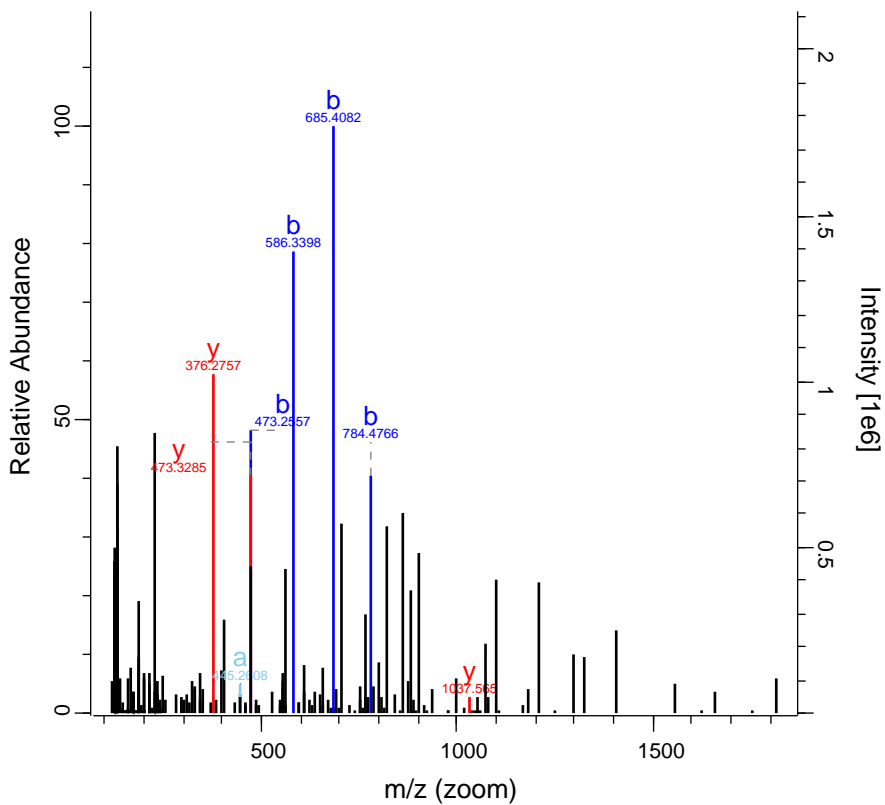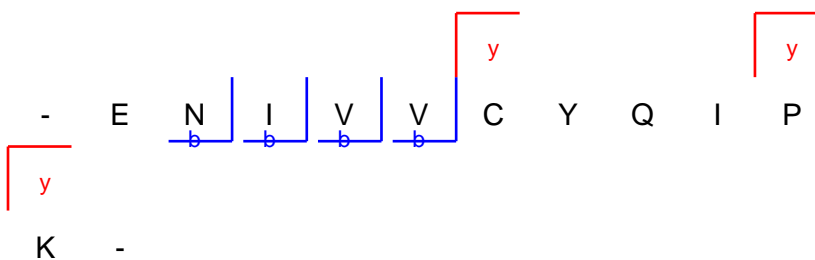

K -



RO-QC-160121\_ZackD\_SS\_Set\_02\_Fraction 25088 FTMS; HC 77.09 854.44 SLC31A1

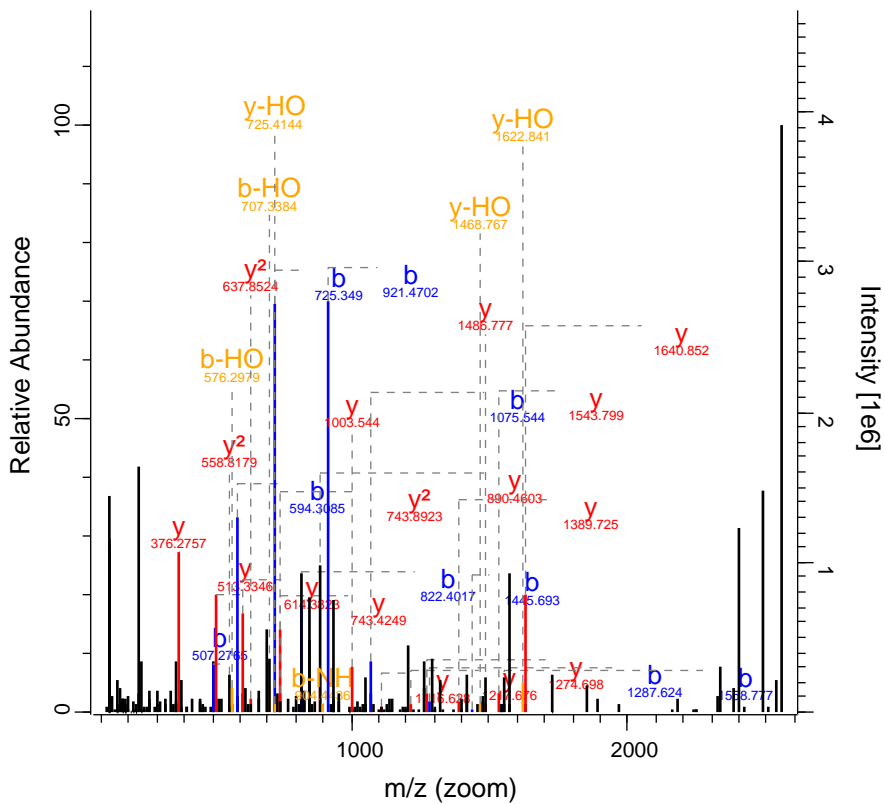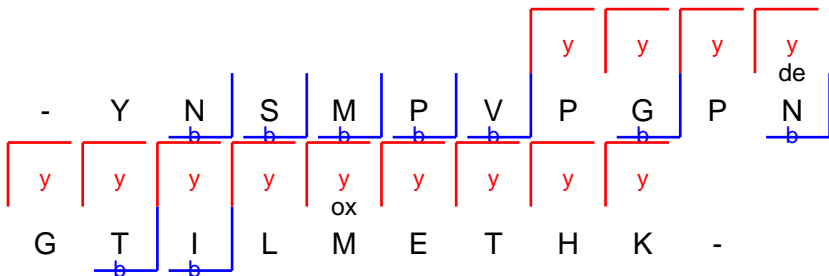

RO-QC-160121\_ZackD\_SS\_Set\_02\_Fractio 25206 FTMS; HC 145.55 831.93 GPRC5B

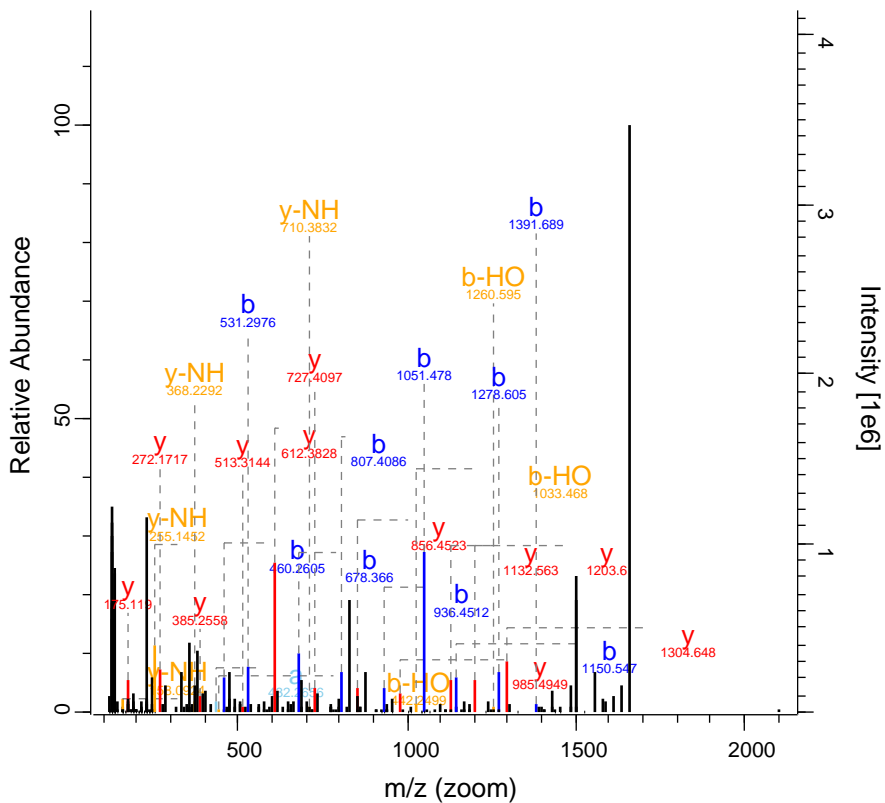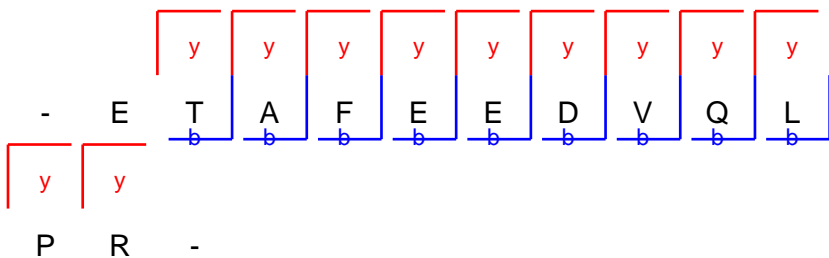

RO-QC-160121\_ZackD\_SS\_Set\_02\_Fractio 25816 FTMS; HC 132.22 465.94 PTRH1

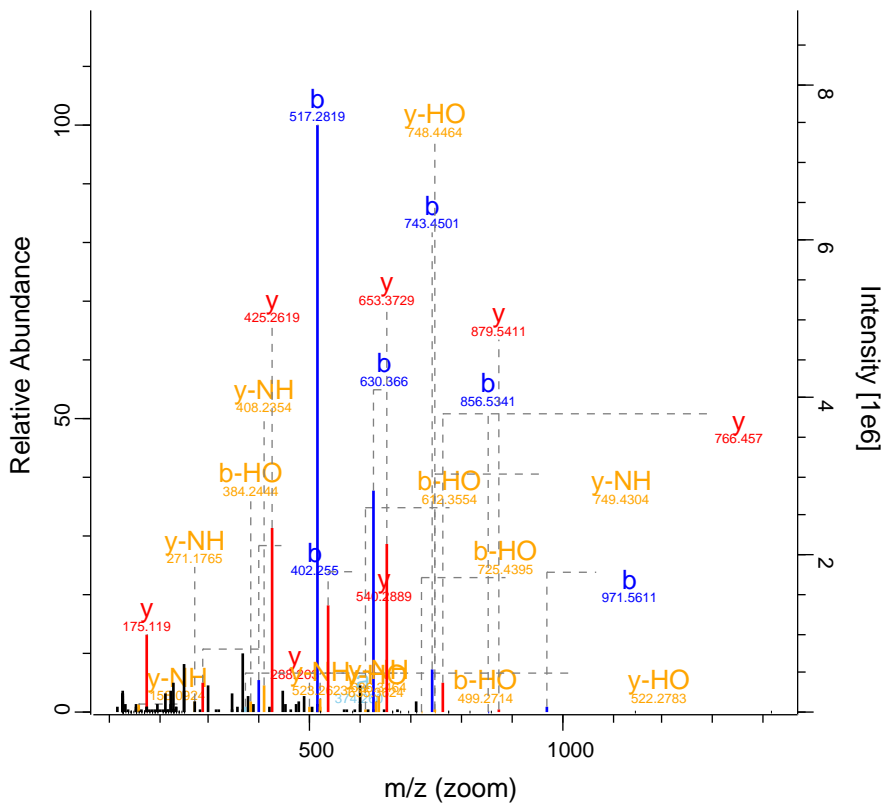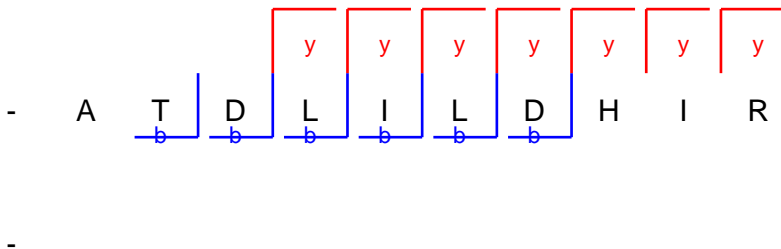

RO-QC-160121\_ZackD\_SS\_Set\_02\_Fraction 26020 FTMS; HC 86.88 466.28 PTRH1

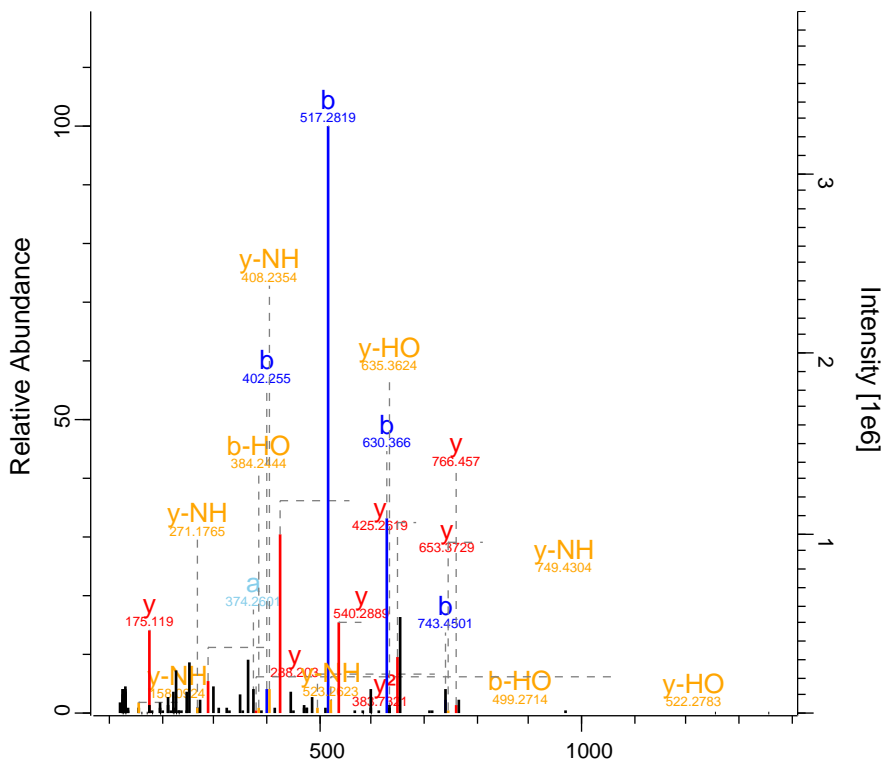

m/z (zoom)

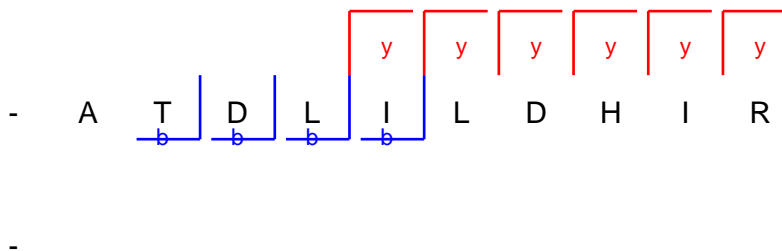



RO-QC-160121\_ZackD\_SS\_Set\_02\_Fraction 26247 FTMS; HCl 75.29 1010 FTMT

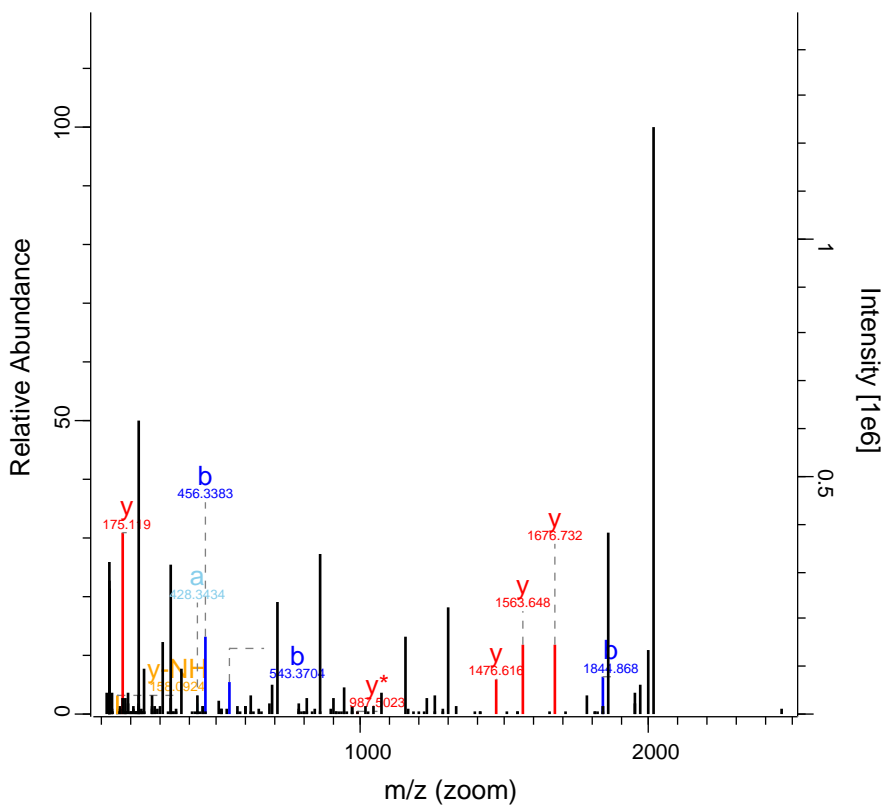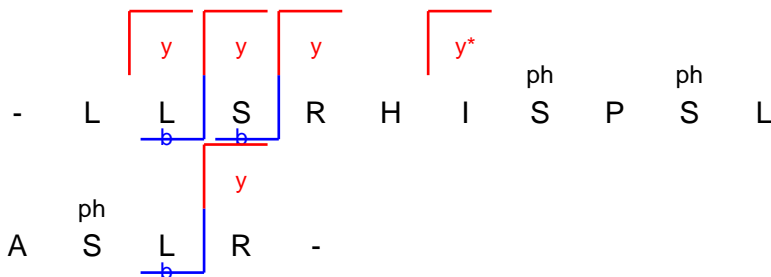

RO-QC-160121\_ZackD\_SS\_Set\_02\_Fractio 26666 FTMS; HC 113.47 830.07 BTC

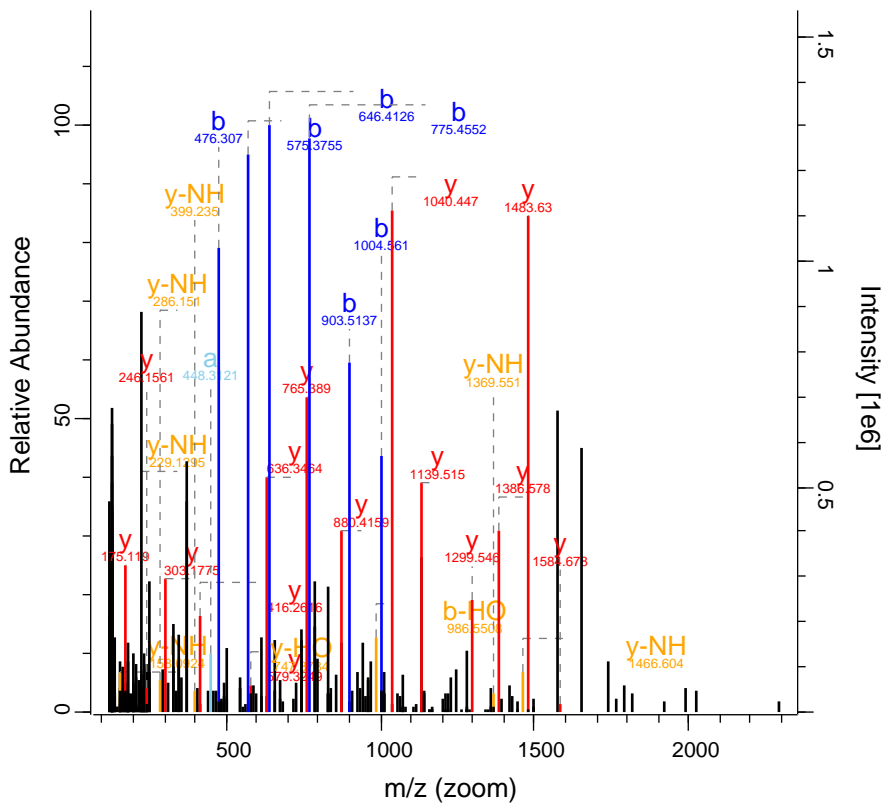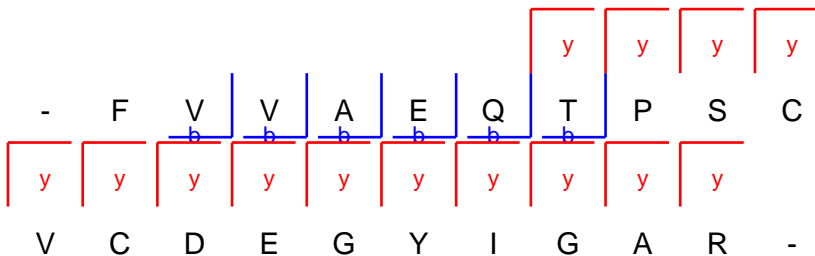

RO-QC-160121\_ZackD\_SS\_Set\_02\_Fractic 27640 FTMS; HC 50.11 1226.12 LRRK1

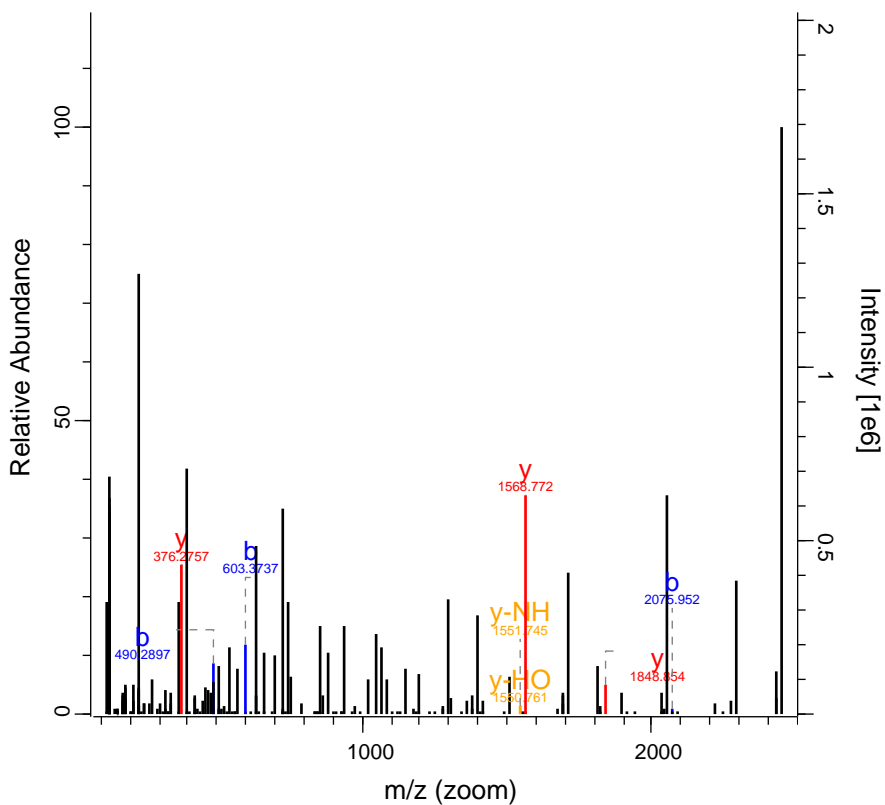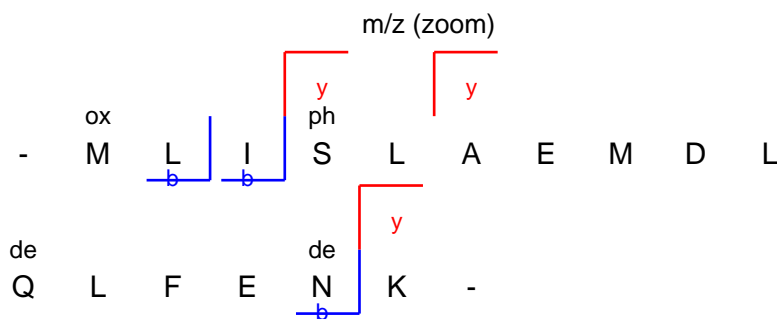



RO-QC-160121\_ZackD\_SS\_Set\_02\_Fractio 27712 FTMS; HC 165.66 845.02 IFNGR1

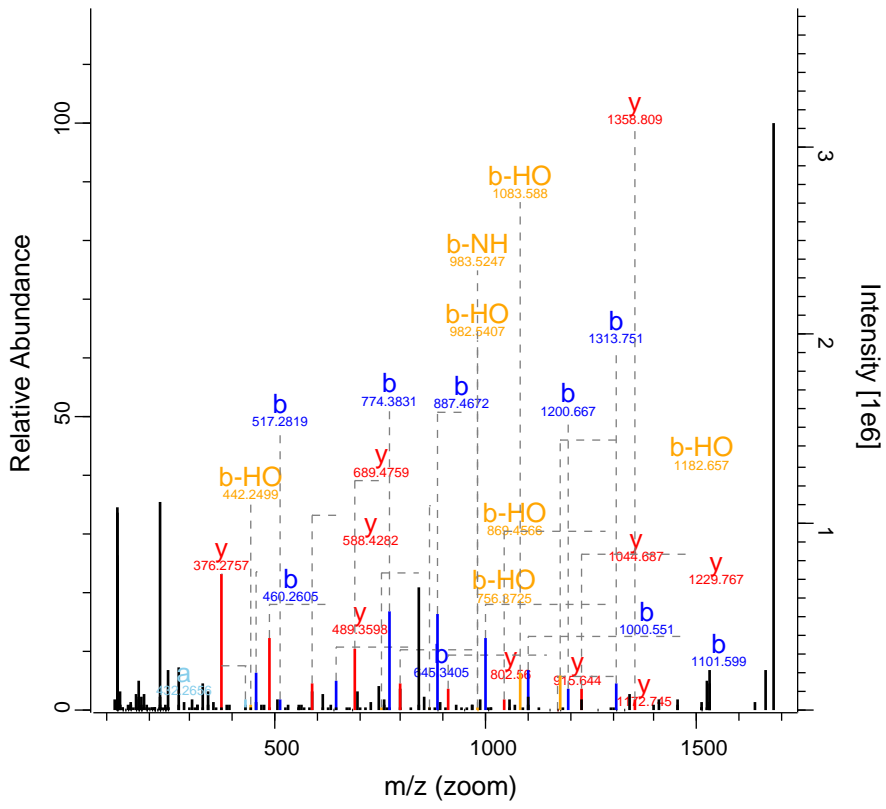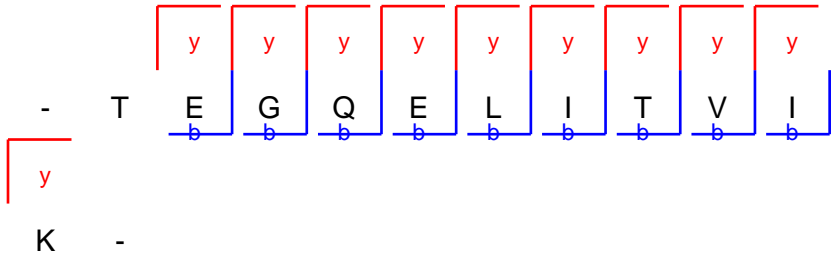

RO-QC-160121\_ZackD\_SS\_Set\_02\_Fraction 27730 FTMS; HC 47.99 564.01 IFNGR1

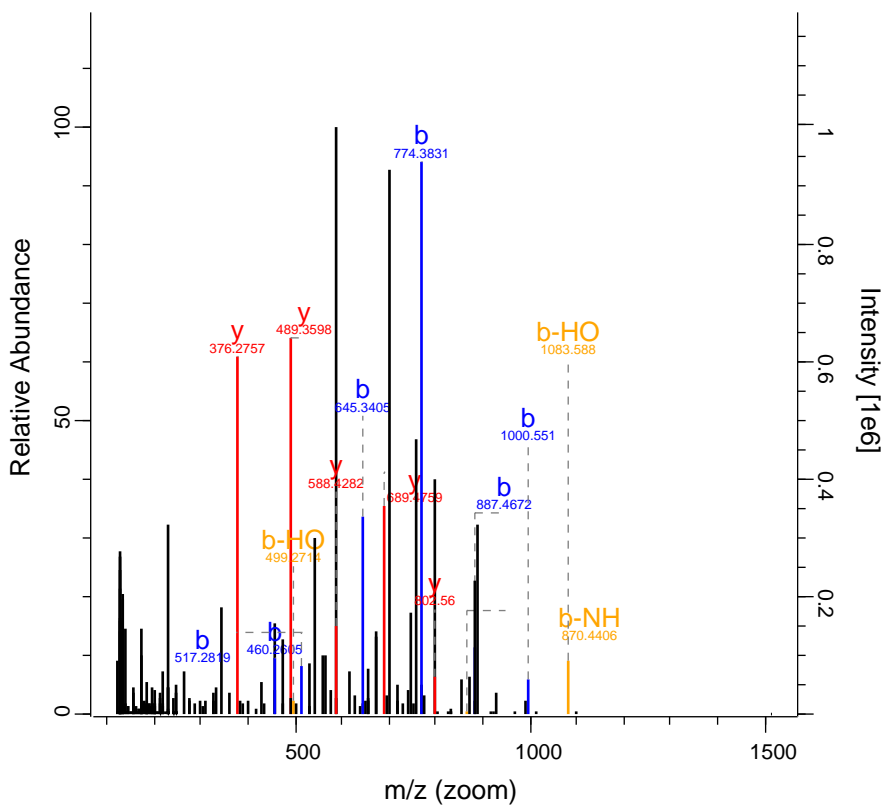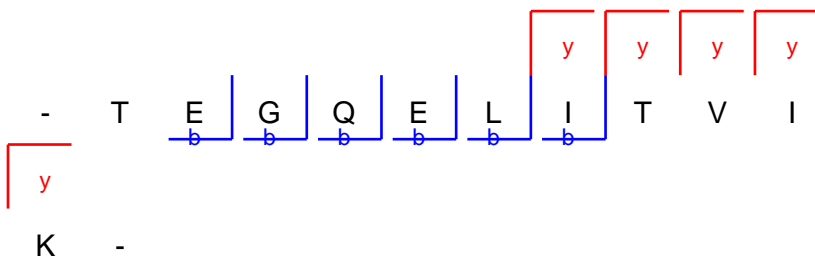

K

RO-QC-160121\_ZackD\_SS\_Set\_02\_Fraction 28782 FTMS; HC 41.65 908.96 CCDC180

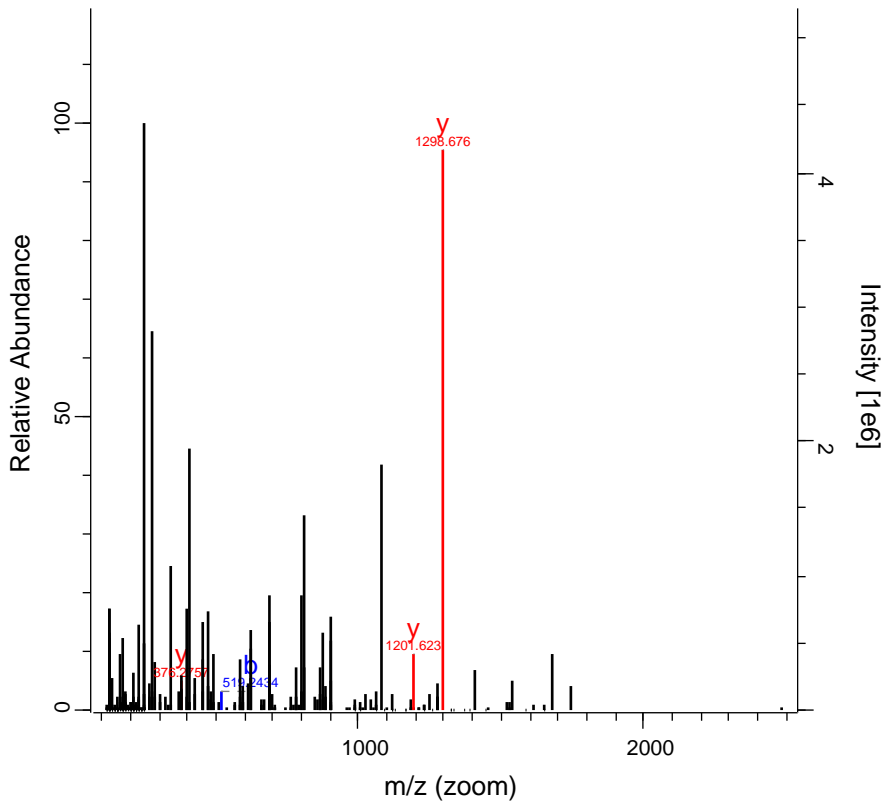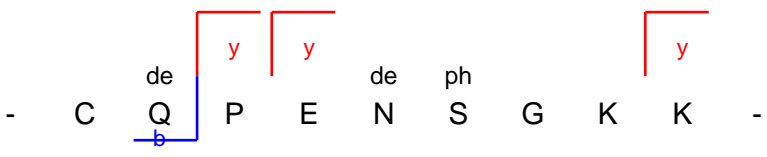

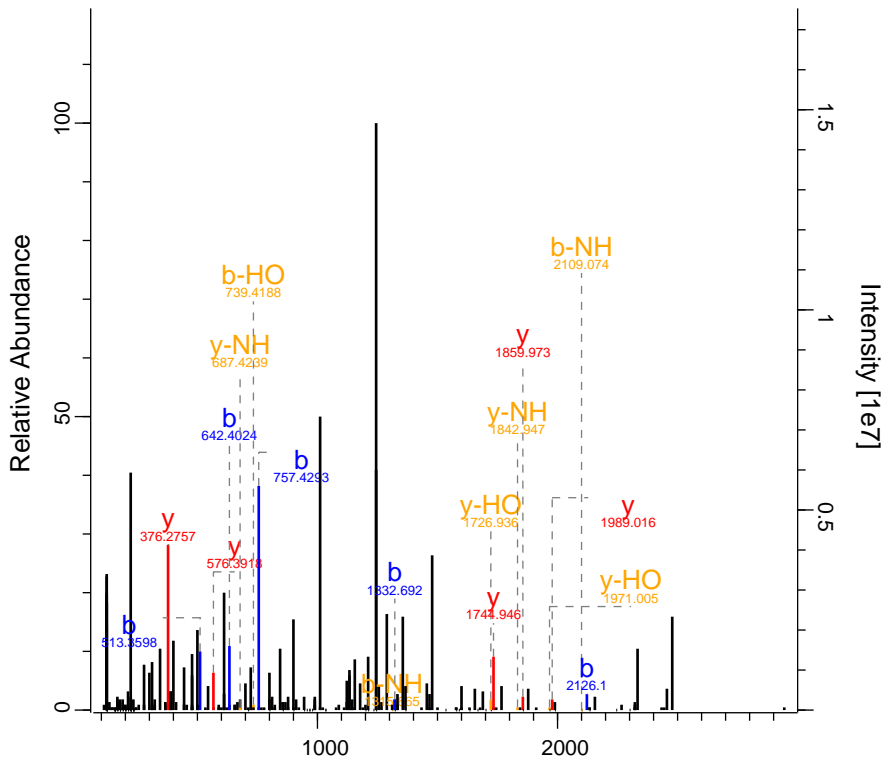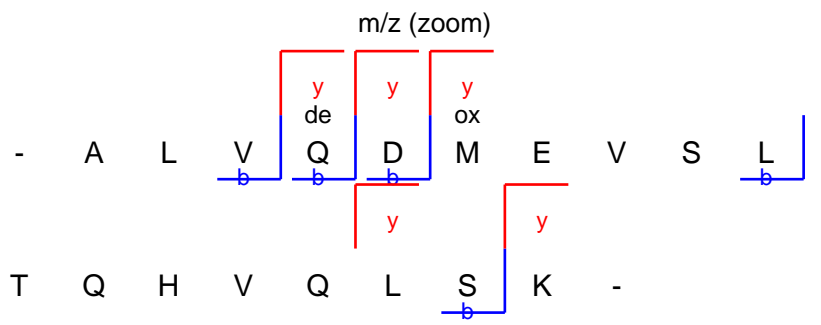

RO-QC-160121\_ZackD\_SS\_Set\_02\_Fraction 29006 FTMS; HC 47.85 908.96 CCDC180

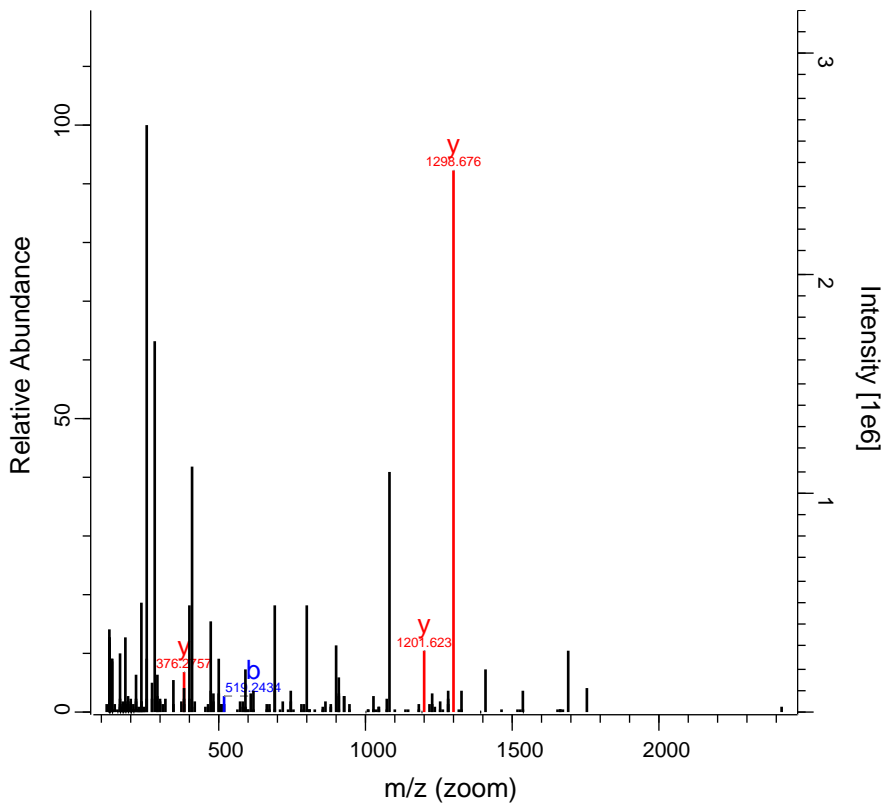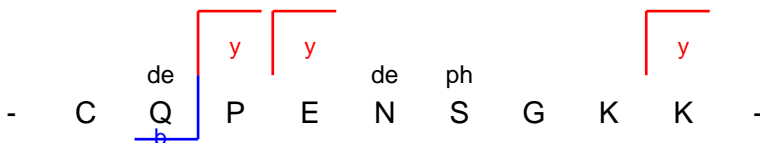

RO-QC-160121\_ZackD\_SS\_Set\_02\_Fraction 30673 FTMS; HC 72.36 757.41 LBH

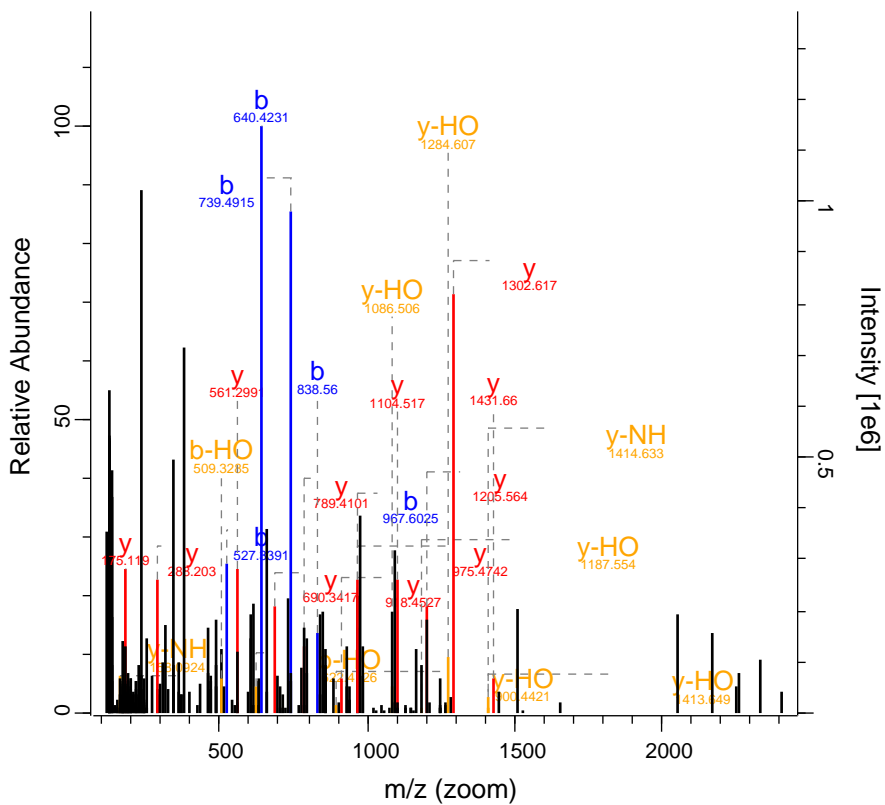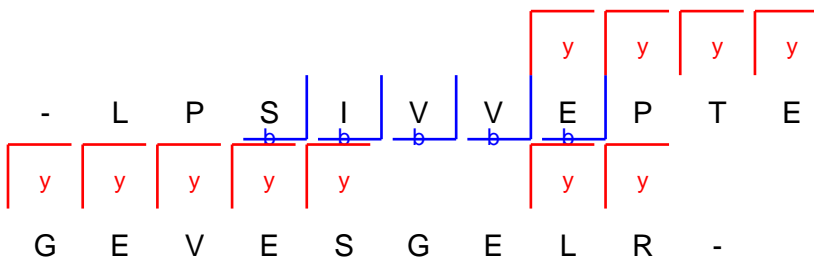



RO-QC-160121\_ZackD\_SS\_Set\_02\_Fractic 31007 FTMS; HC 41.76 1046.18 ALPK3

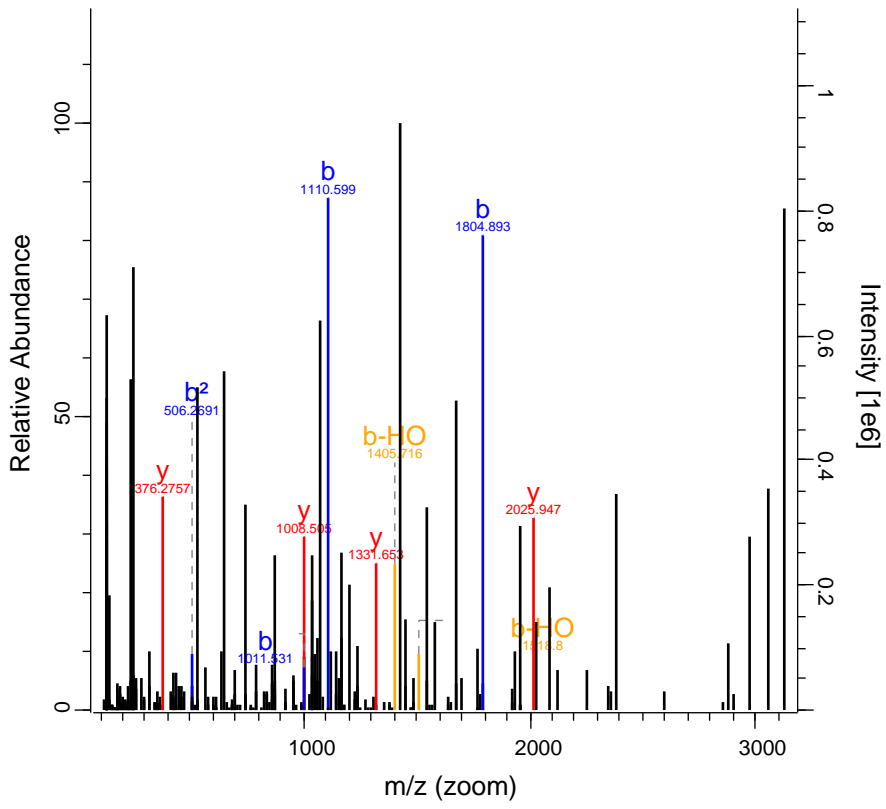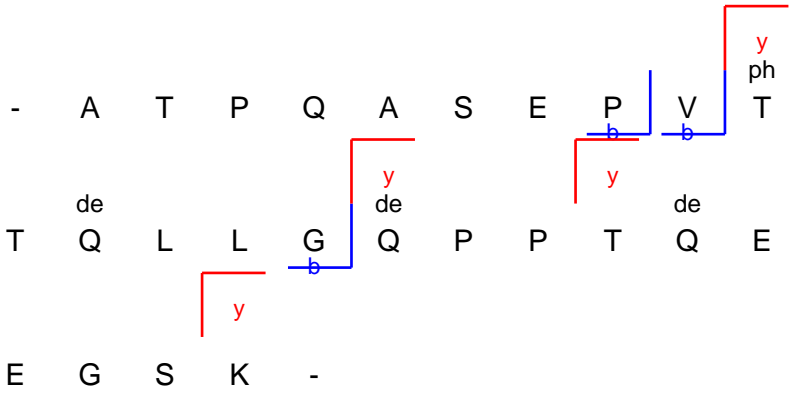



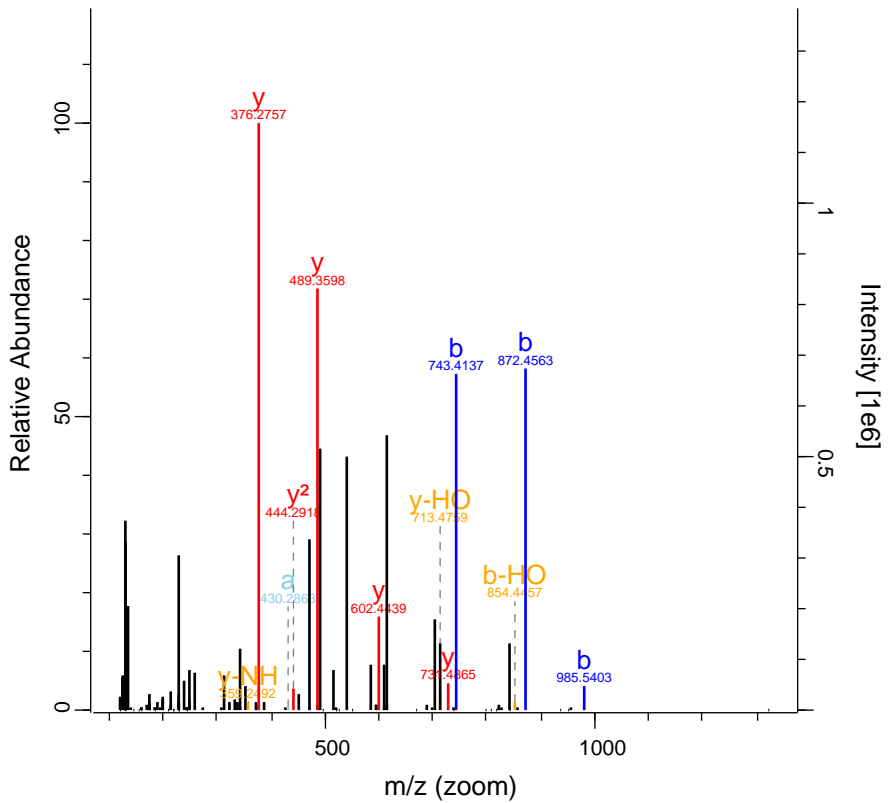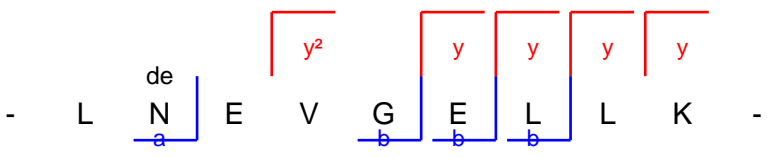

RO-QC-160121\_ZackD\_SS\_Set\_02\_Fractio 32332 FTMS; HC 165.19 994.85 NDUFAF6

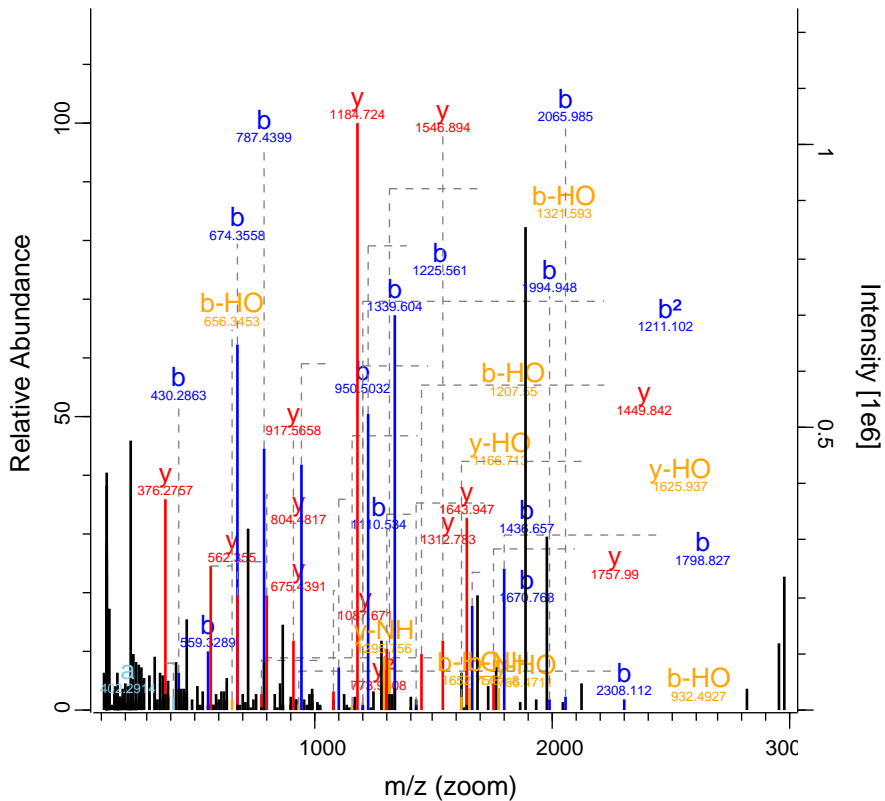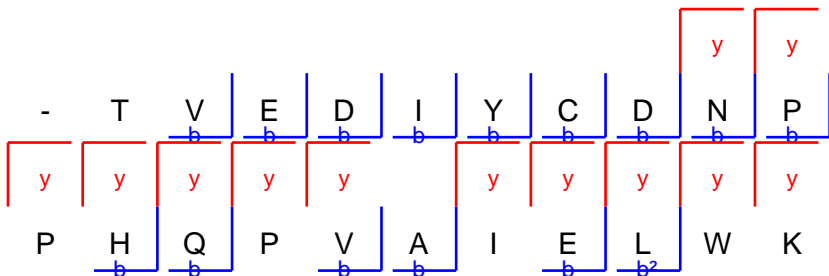

RO-QC-160121\_ZackD\_SS\_Set\_02\_Fraction 32742 FTMS; HC 41.54 680.34 NPHS2

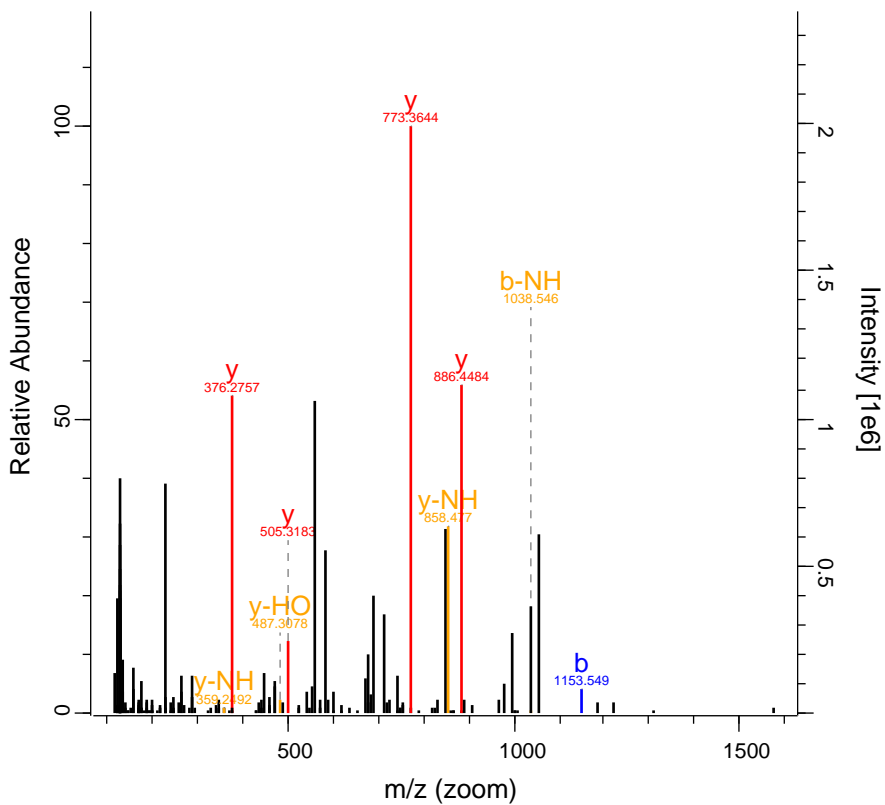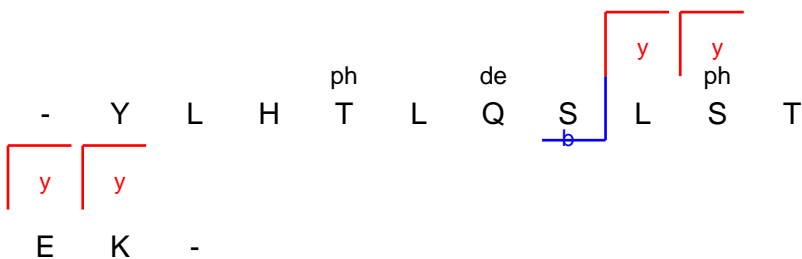

RO-QC-160121\_ZackD\_SS\_Set\_02\_Fraction 34803 FTMS; HC 40.04 822.47 OR10G3

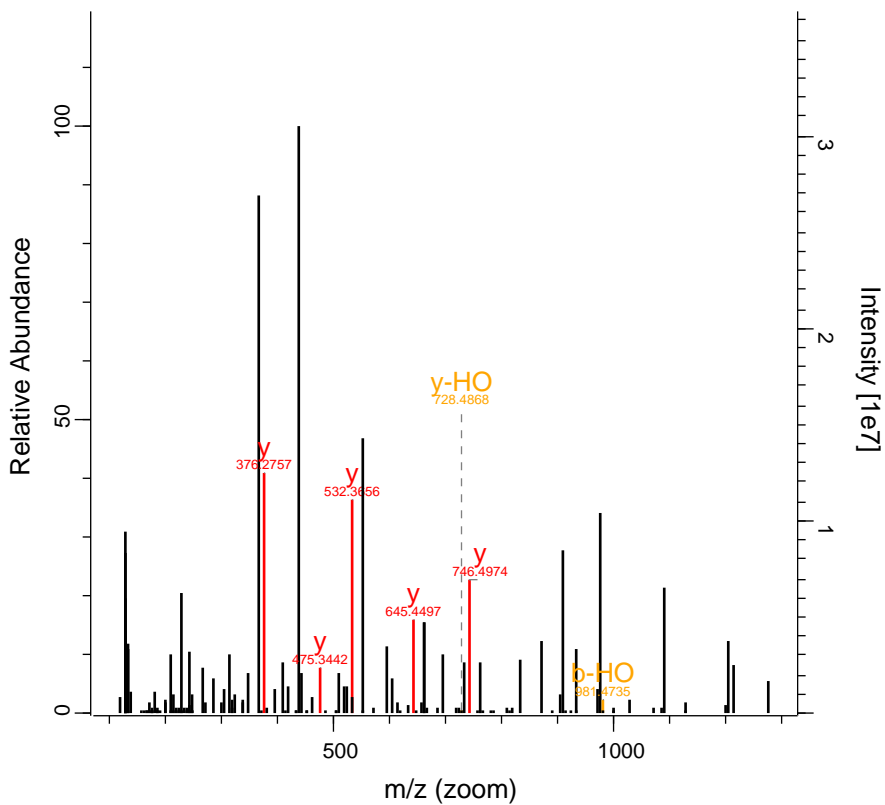

Fragmentation diagram showing peptide sequence: L M M N F T L G V K. Oxidation sites (ox) are indicated above M and M. Fragmentation sites (y) are indicated above T, L, G, V, and K.

RO-QC-160121\_ZackD\_SS\_Set\_02\_Fractio 35661 FTMS; HC 225.23 1032.51 CHCHD10

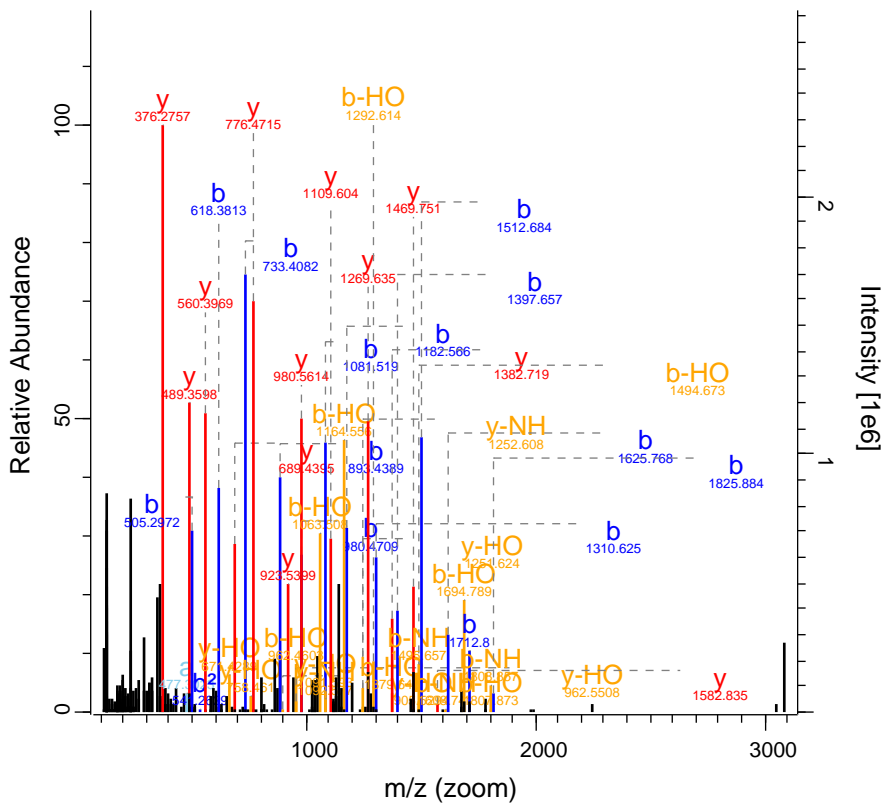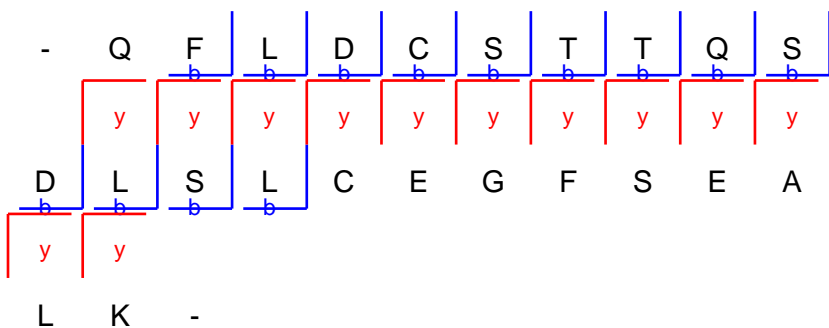

RO-QC-160121\_ZackD\_SS\_Set\_02\_Fraction 35687 FTMS; HC 94.38 774.89 CHCHD10

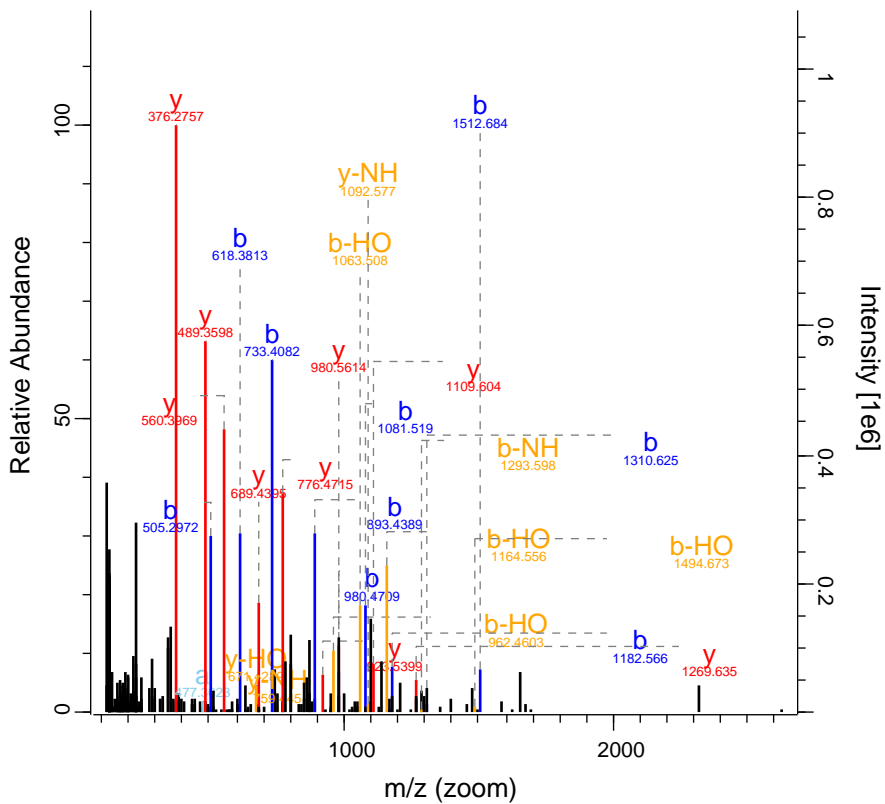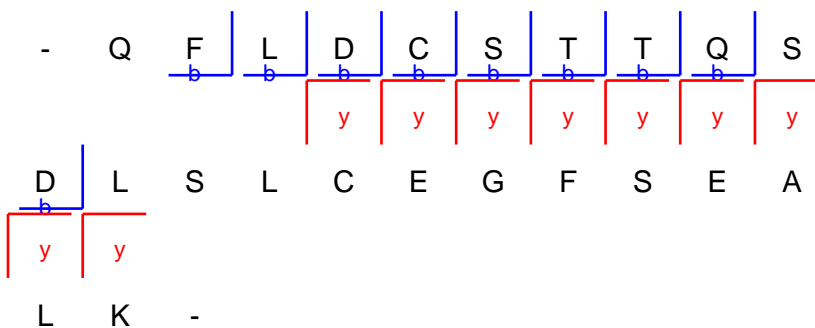

RO-QC-160121\_ZackD\_SS\_Set\_02\_Fractic 35845 FTMS; HC 172.24 1032.51 CHCHD10

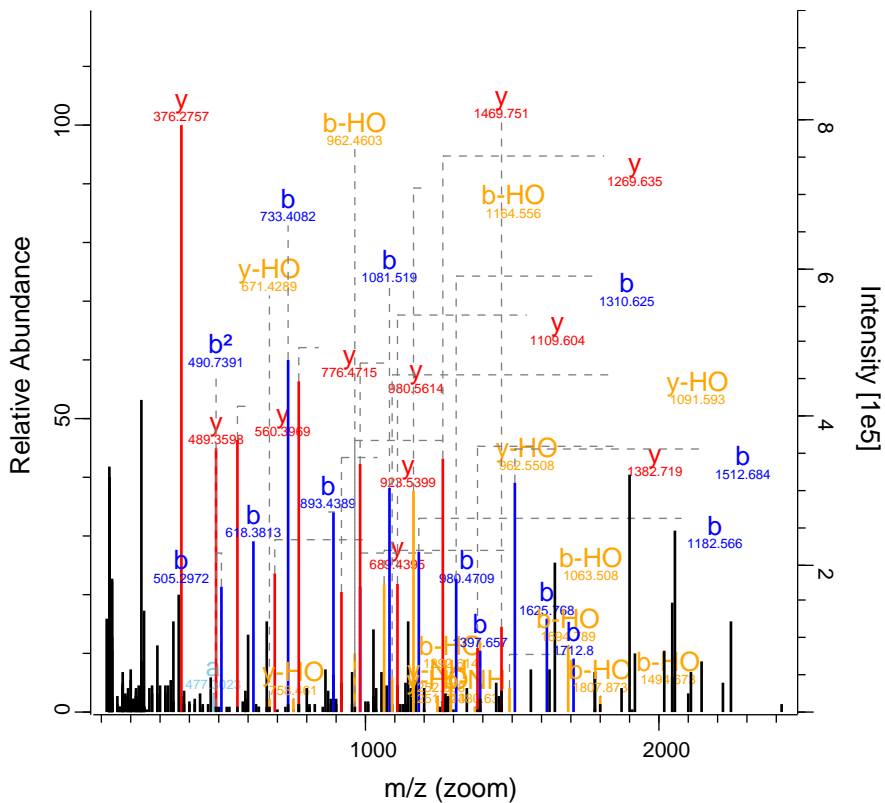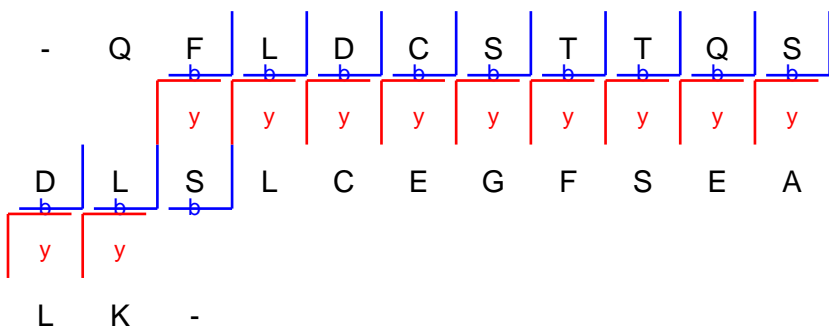

RO-QC-160121\_ZackD\_SS\_Set\_02\_Fractic 35998 FTMS; HC 97.69 1065.02 EMB

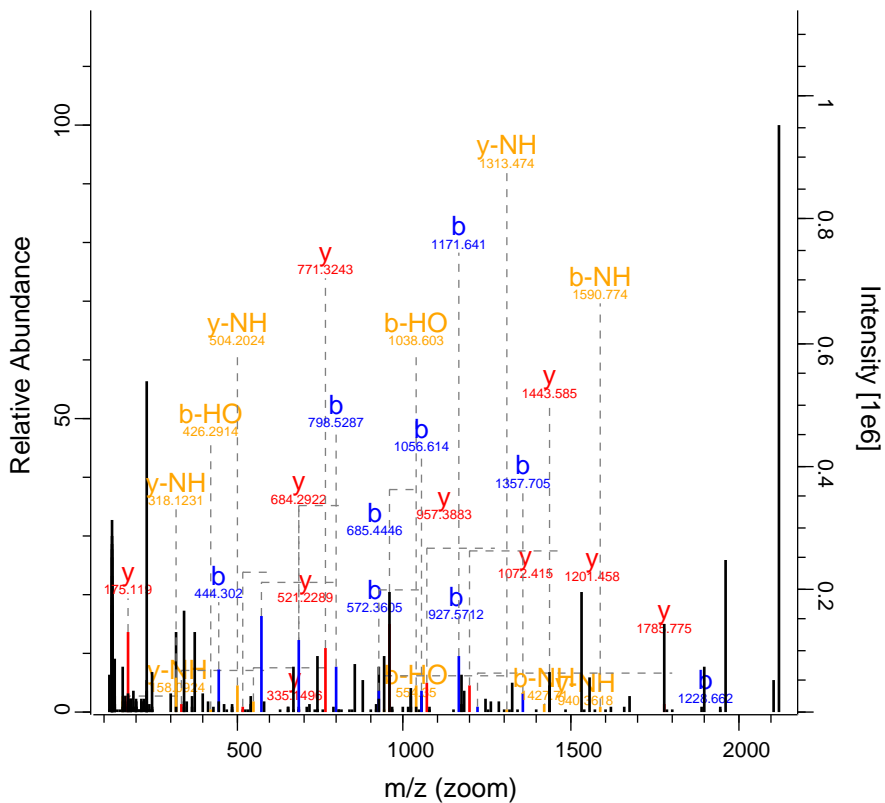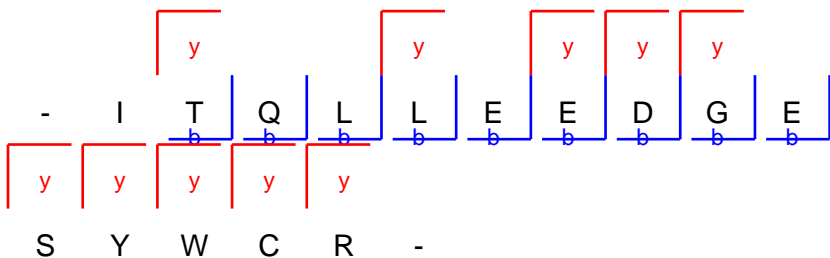



Raw File

Scan Method Score m/z

RO-QC-160121\_ZackD\_SS\_Set\_02\_Fraction\_3

36341 FTMS; HCD 49.3 1054.61

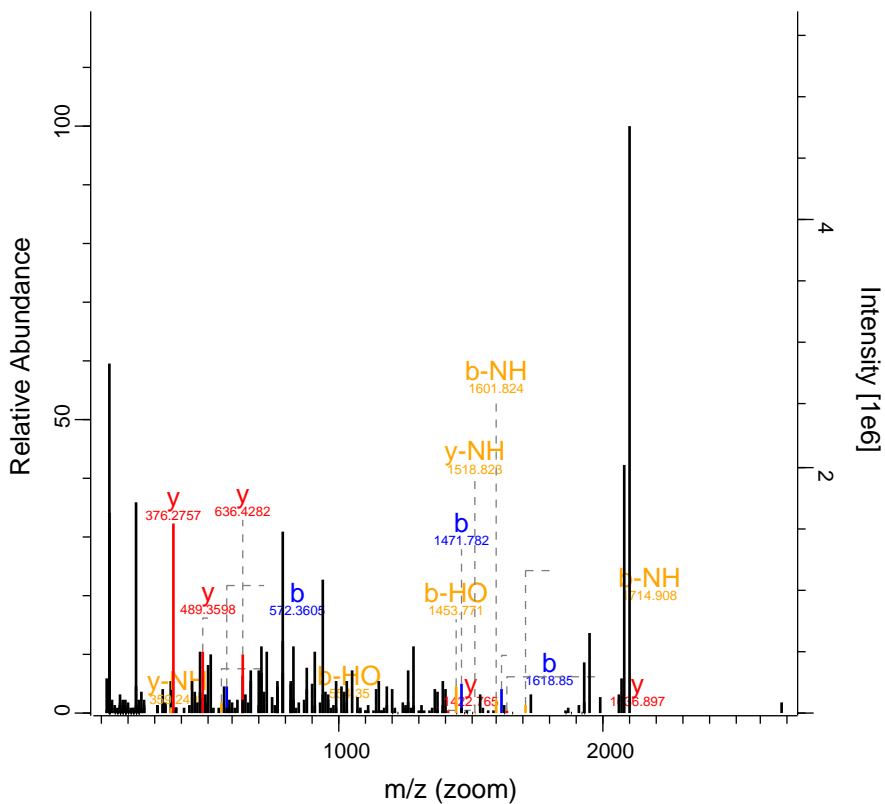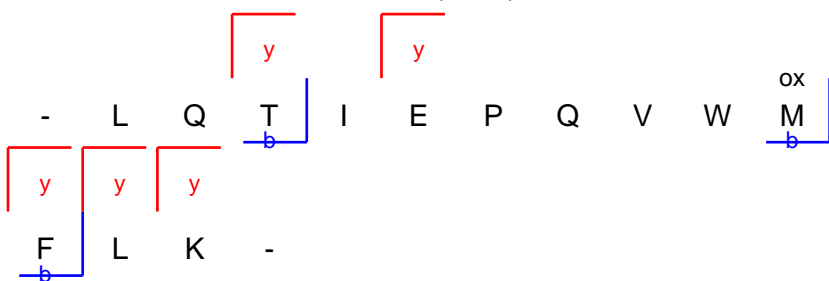

RO-QC-160121\_ZackD\_SS\_Set\_02\_Fractic 37252 FTMS; HC 84.27 1001.96 C5orf45

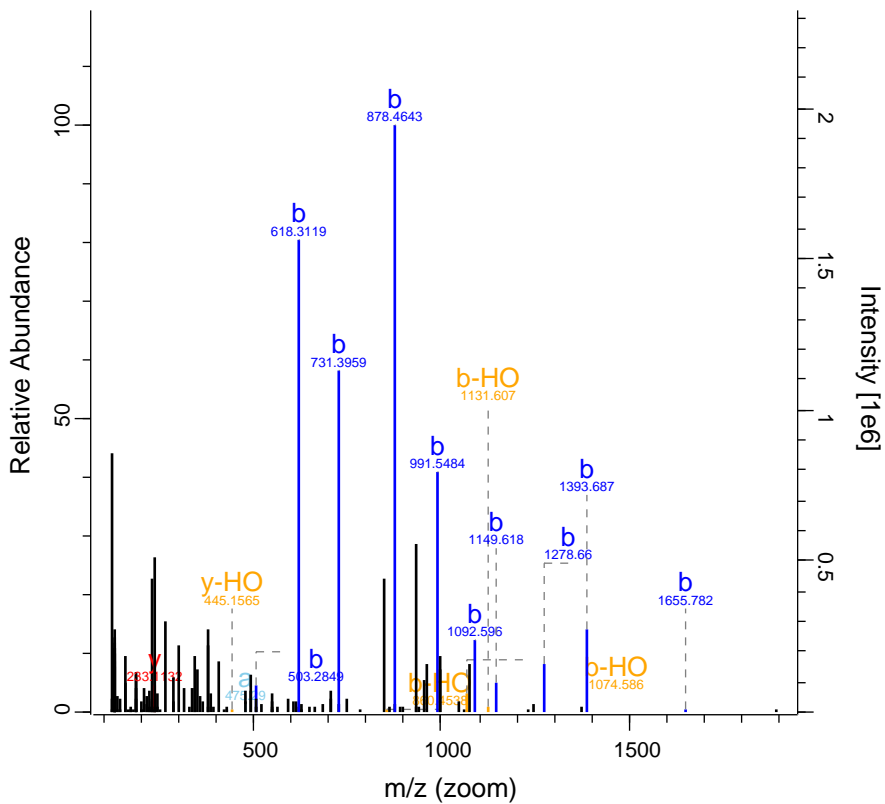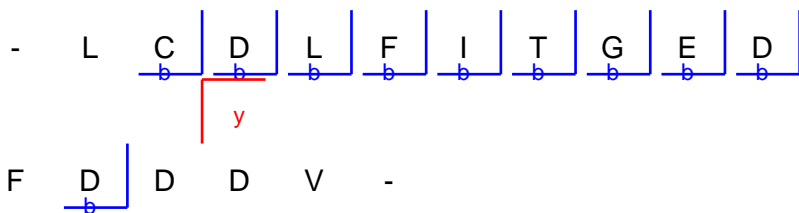

RO-QC-160121\_ZackD\_SS\_Set\_02\_Fractio 37349 FTMS; HC 159.34 787.78 FUNDC1

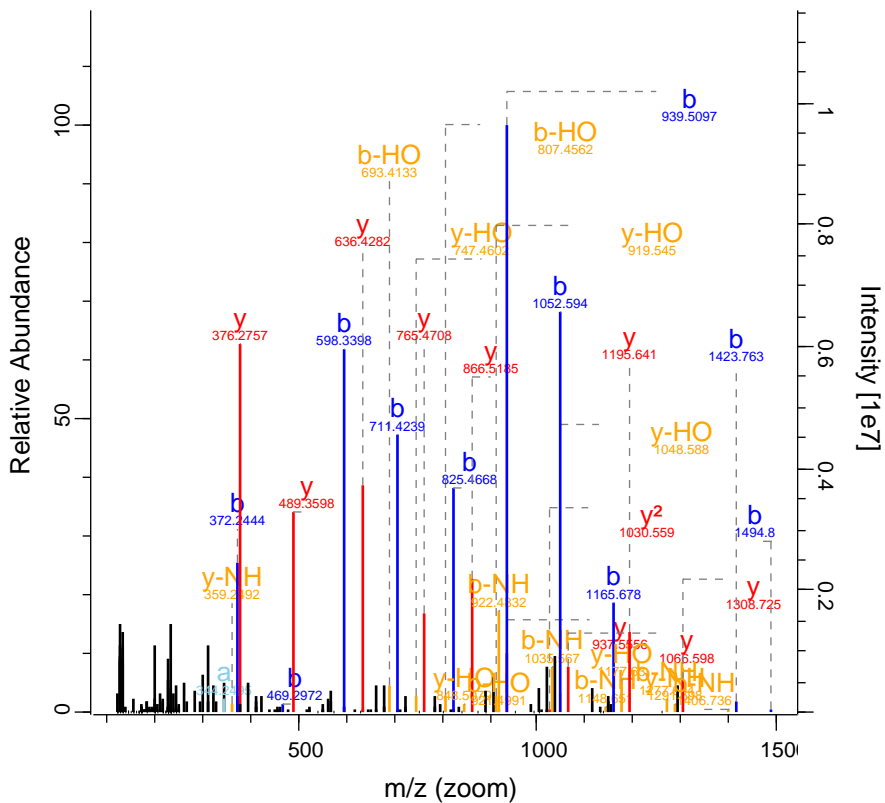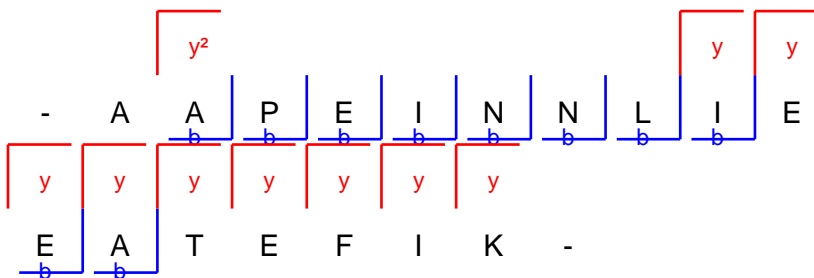

RO-QC-160121\_ZackD\_SS\_Set\_02\_Fraction 5452 FTMS; HCl 45.16 580.98 PATZ1

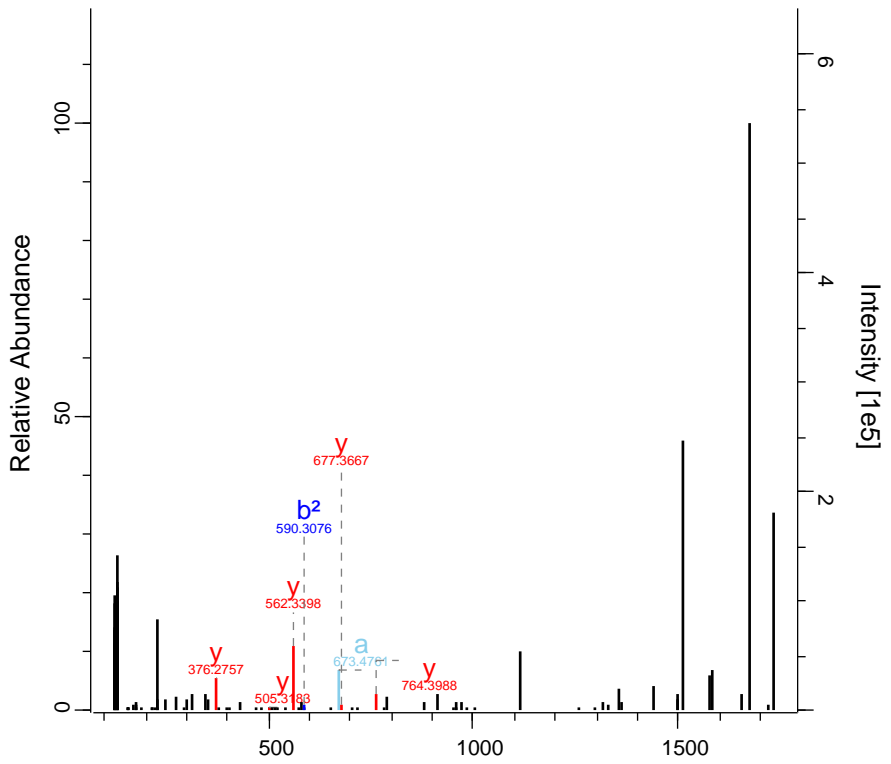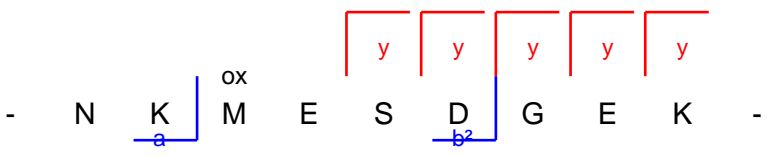



RO-QC-160121\_ZackD\_SS\_Set\_02\_Fraction 6157 FTMS; HCl 64.57 467.94 SLCO4A1

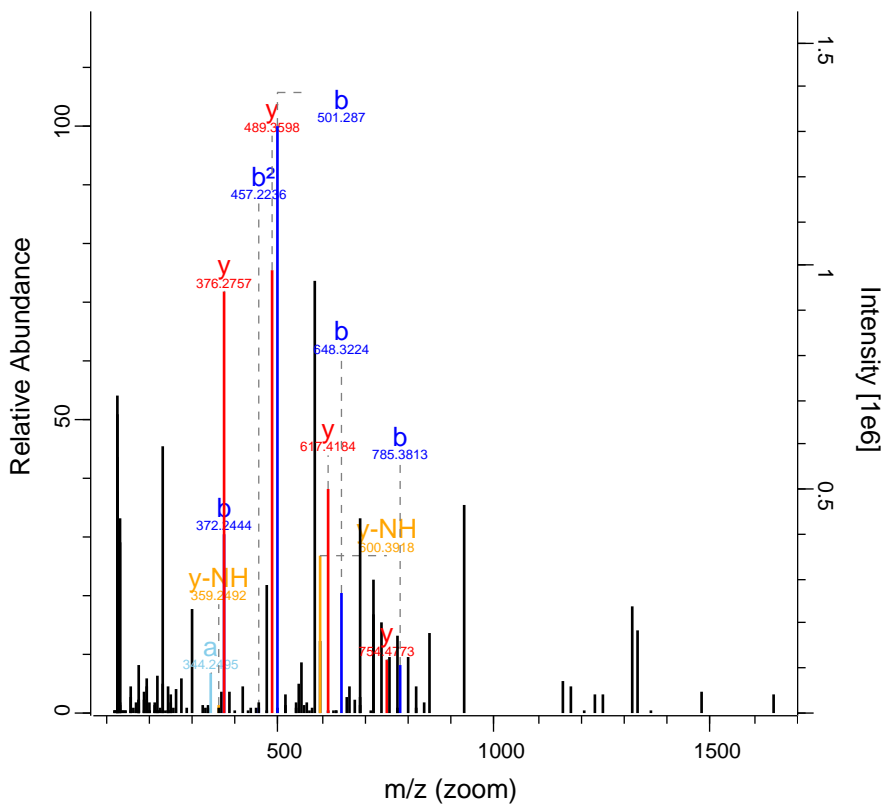

m/z (zoom)

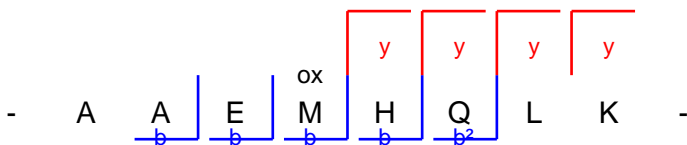

RO-QC-160121\_ZackD\_SS\_Set\_02\_Fraction 6420 FTMS; HC 128.36 660.85 PEX26

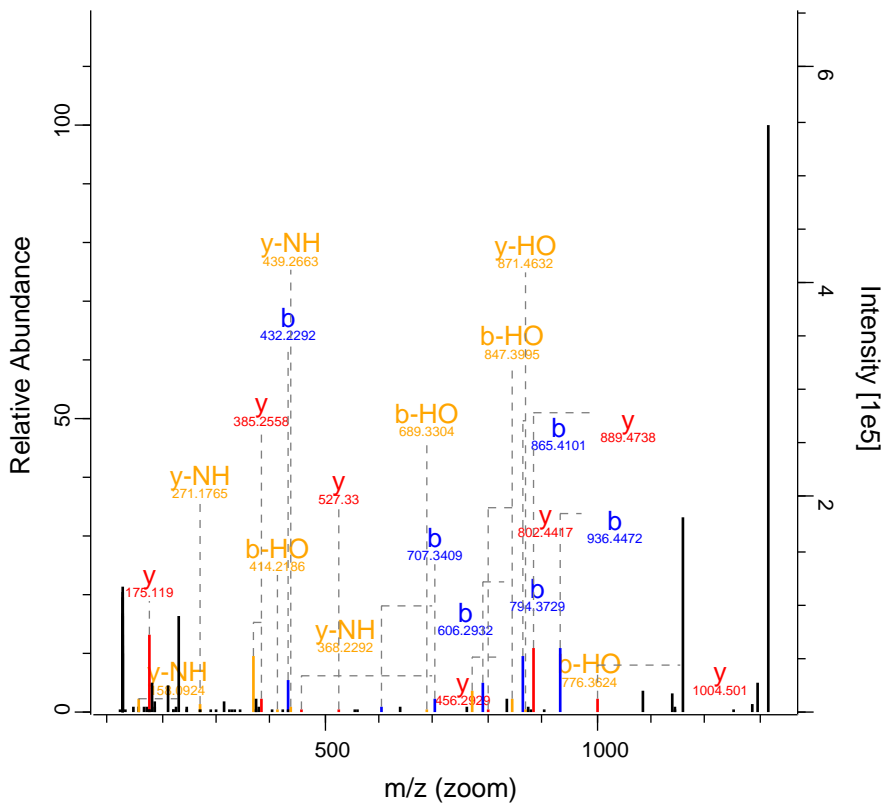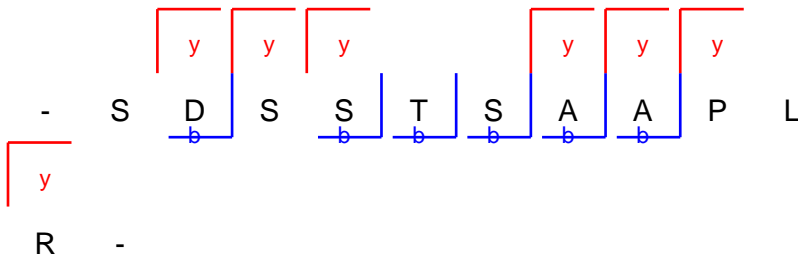

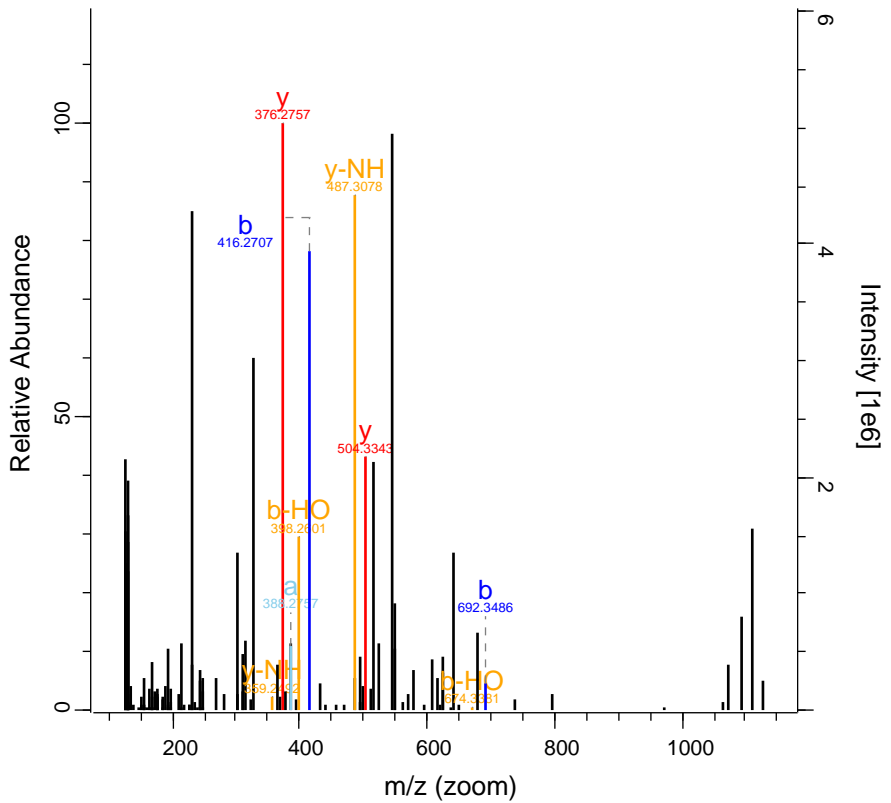



RO-QC-160121\_ZackD\_SS\_Set\_02\_Fraction 6580 FTMS; HCl 109 429.24 ZNF668

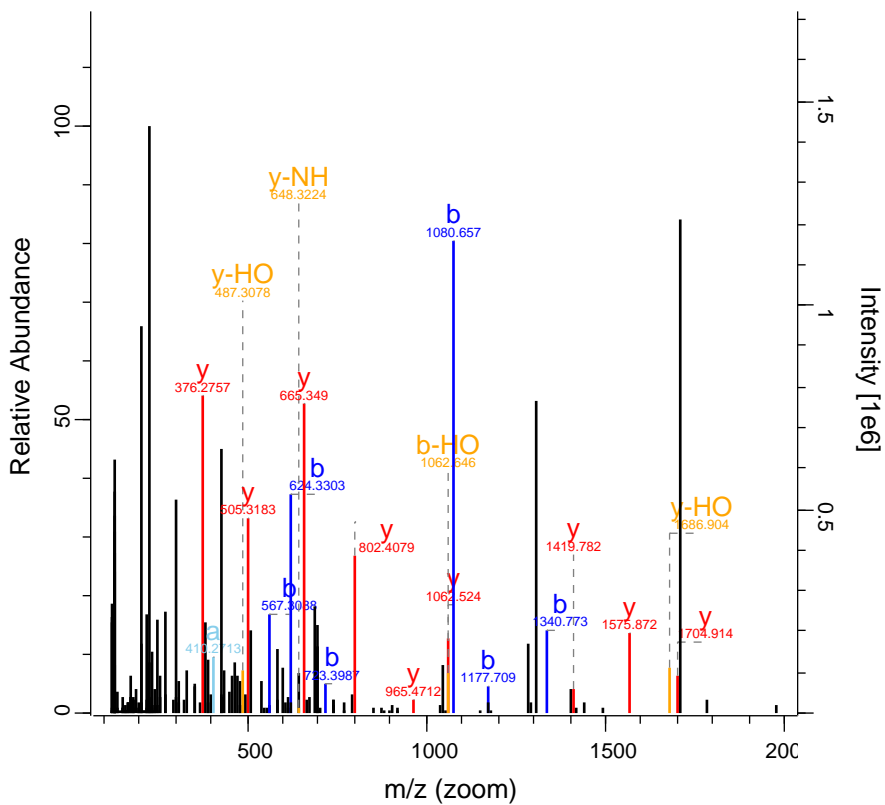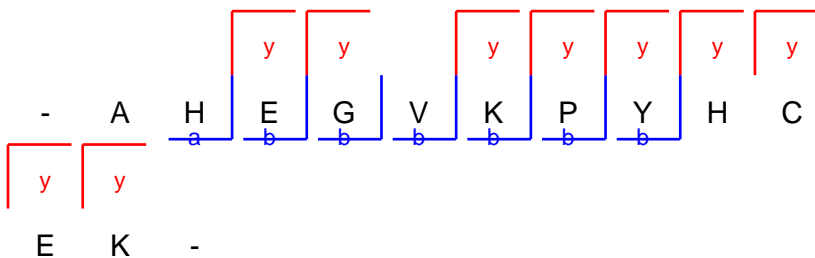



RO-QC-160121\_ZackD\_SS\_Set\_02\_Fraction 7138 FTMS; HCl 170.47 682.4 PWWP2A

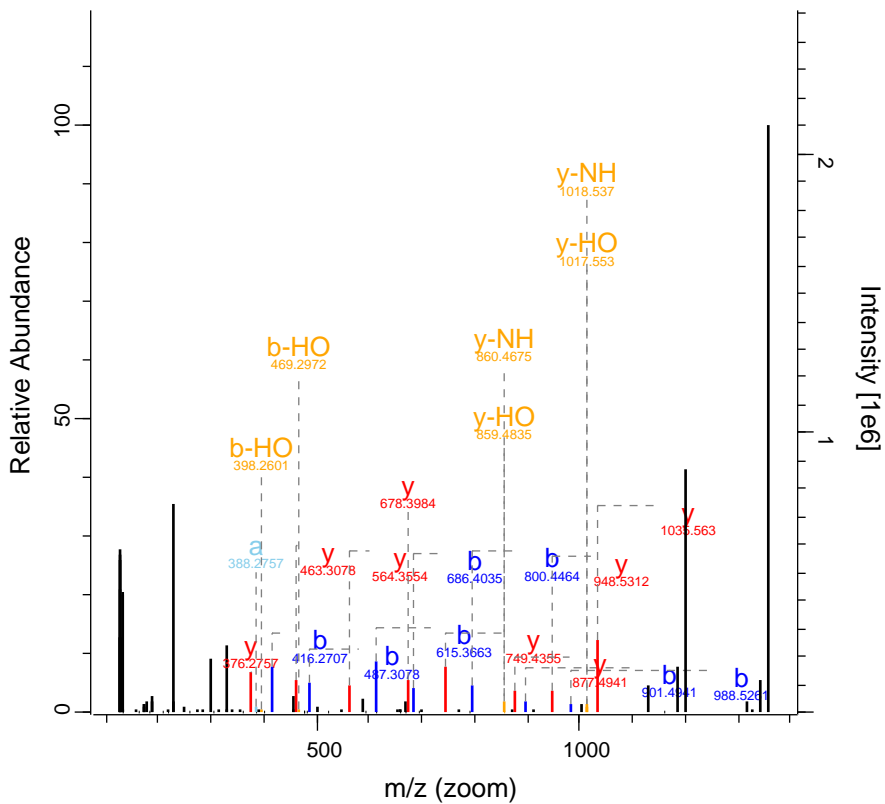

m/z (zoom)

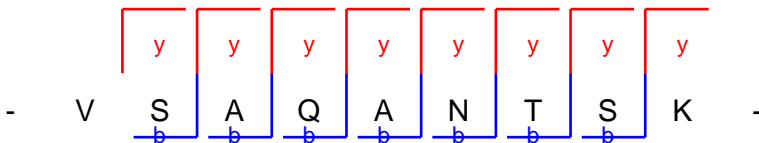

RO-QC-160121\_ZackD\_SS\_Set\_02\_Fraction 7156 FTMS; HCl 105.98 786.9 SLC46A1

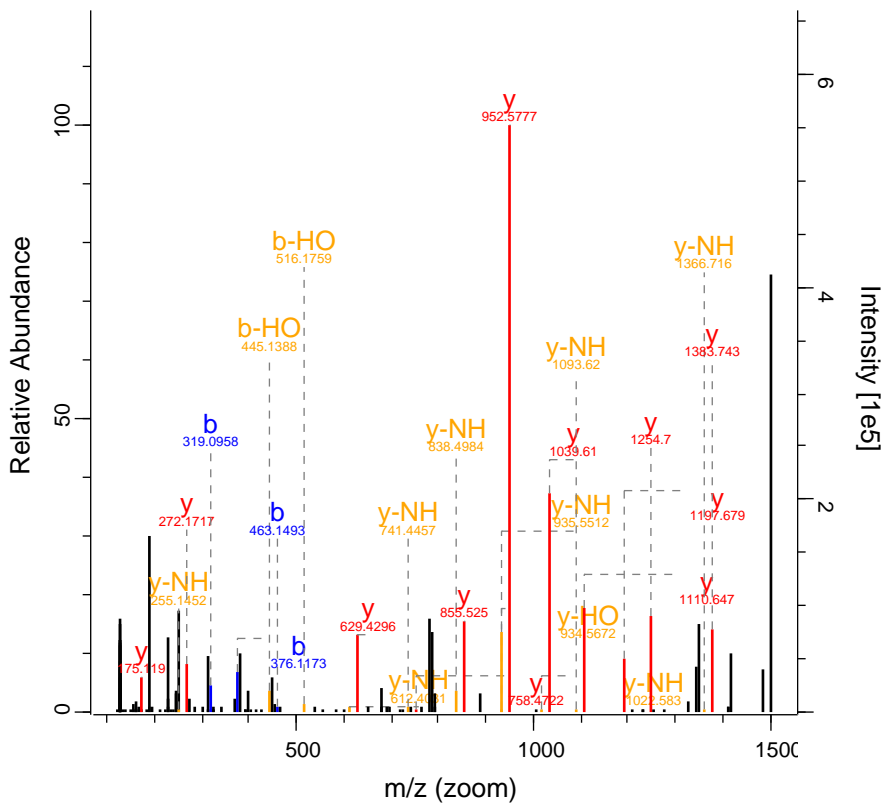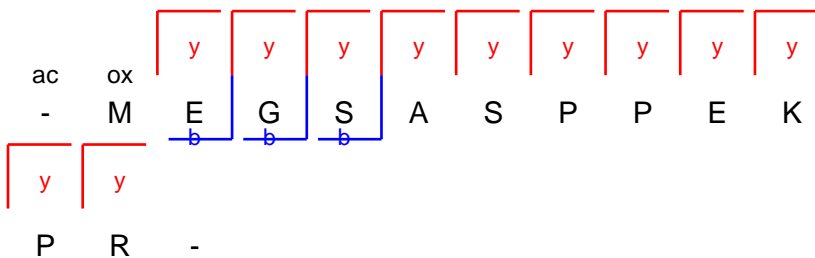

RO-QC-160121\_ZackD\_SS\_Set\_02\_Fraction 7536 FTMS; HCl 85.81 547.3 DOLPP1

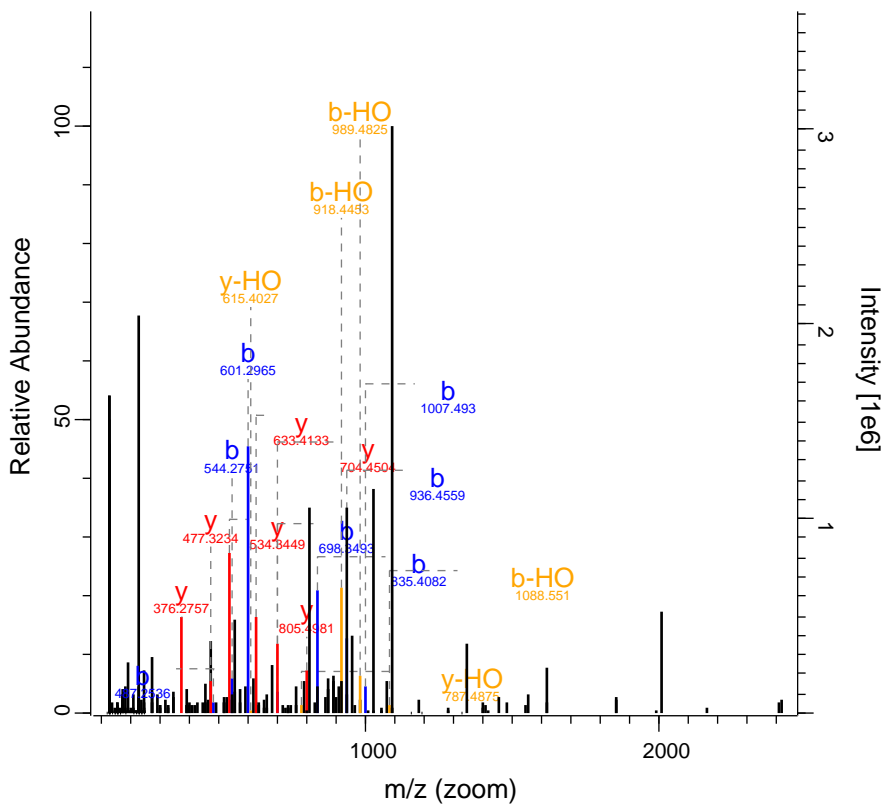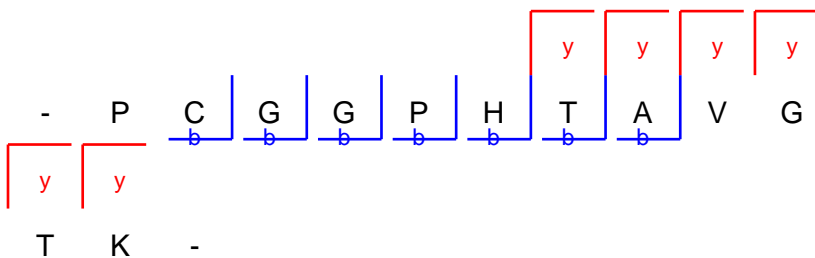

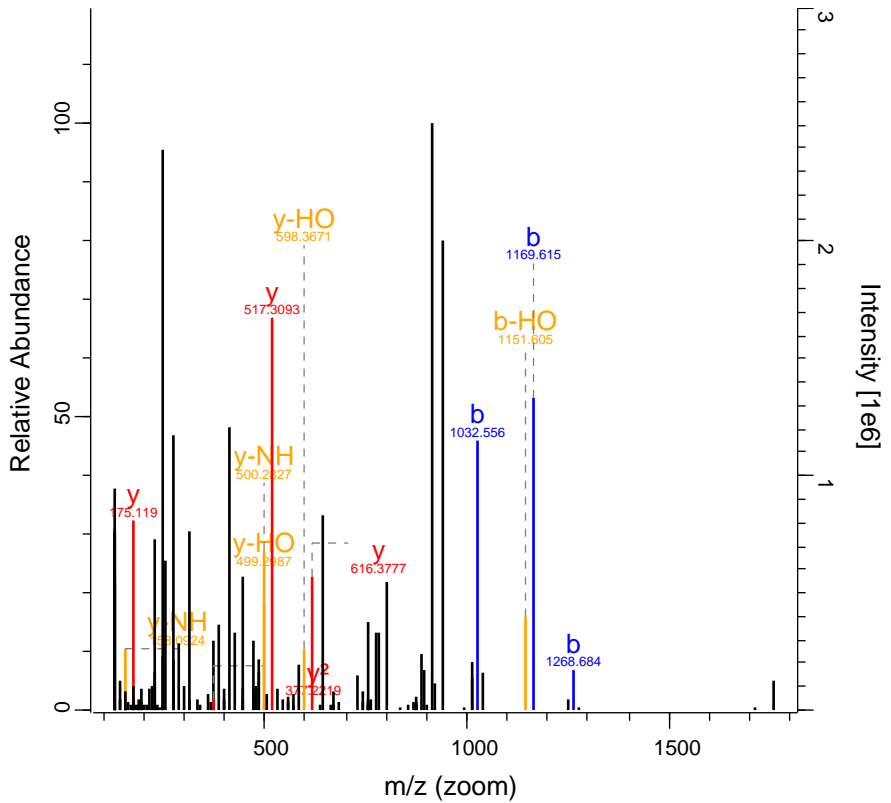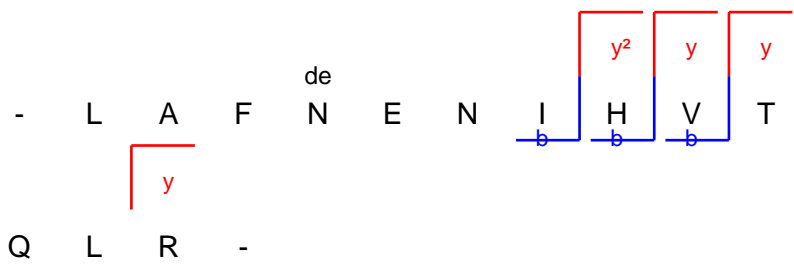

RO-QC-160121\_ZackD\_SS\_Set\_02\_Fraction 8653 FTMS; HCl 62.57 841.9 GLRX2

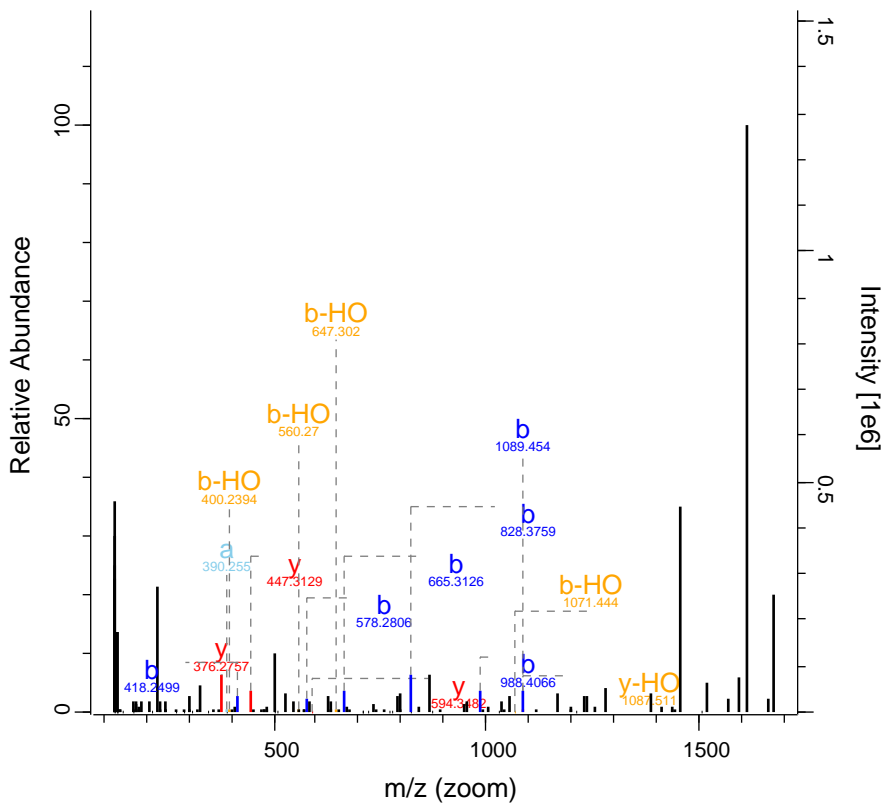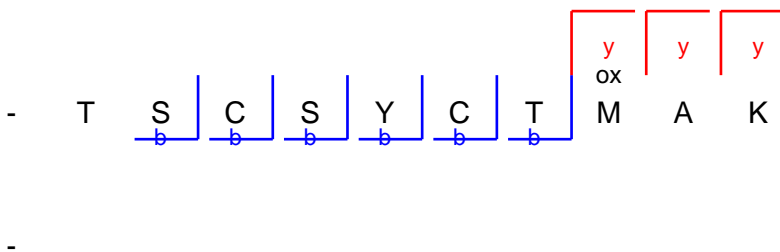

RO-QC-160121\_ZackD\_SS\_Set\_02\_Fraction 8886 FTMS; HCl 62.72 699.39 SLC7A6

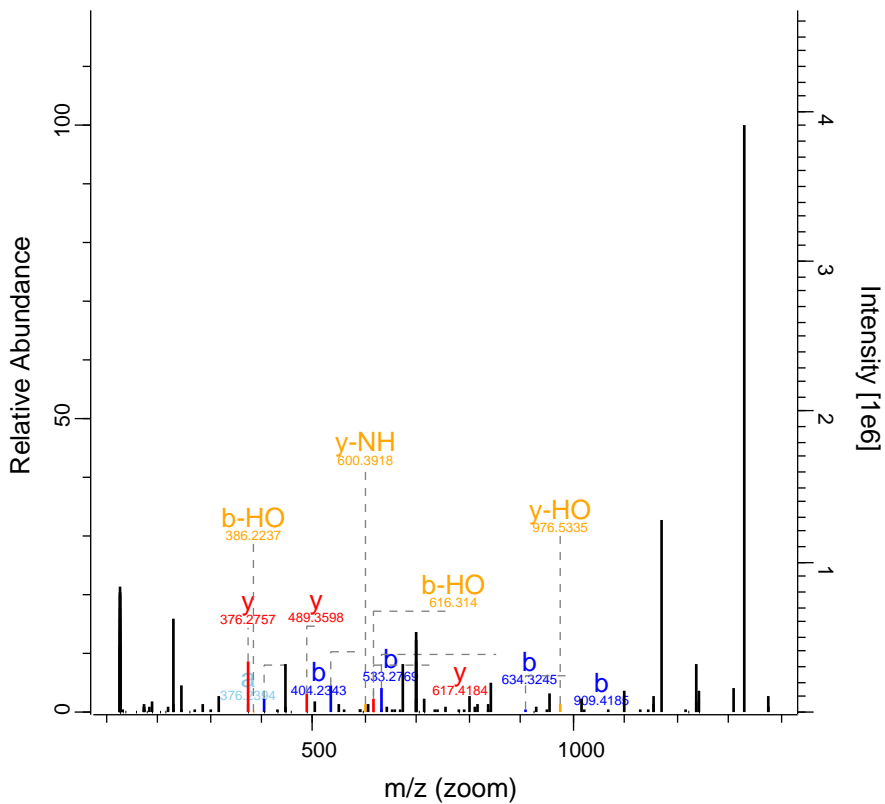



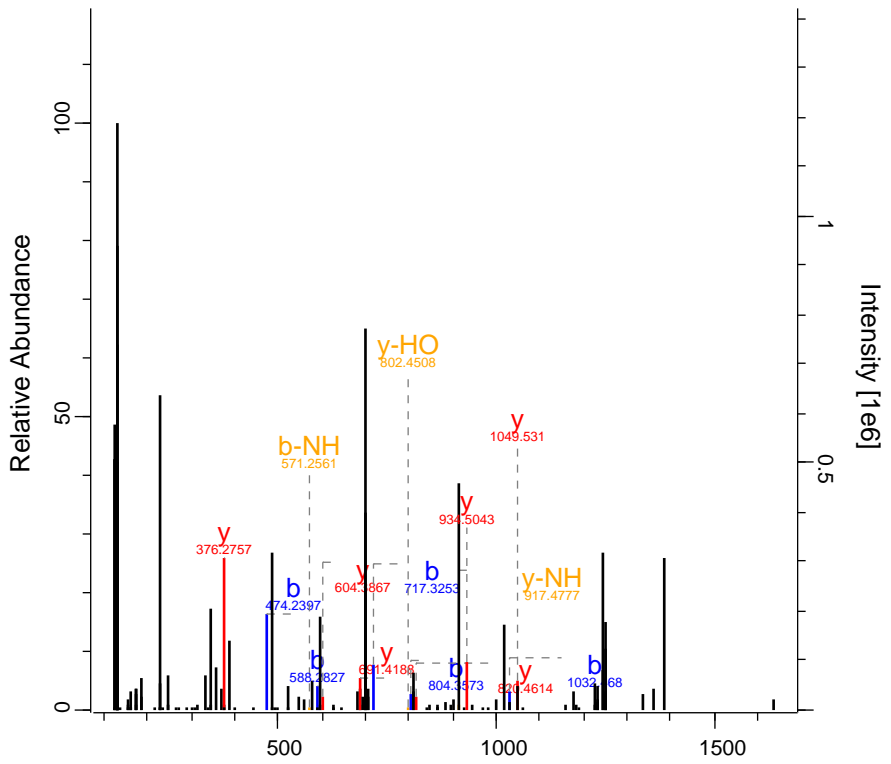

m/z (zoom)

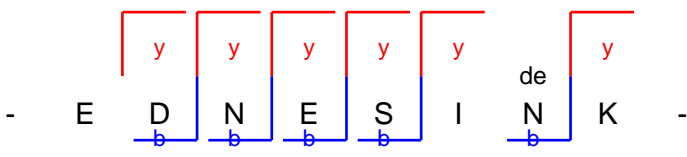

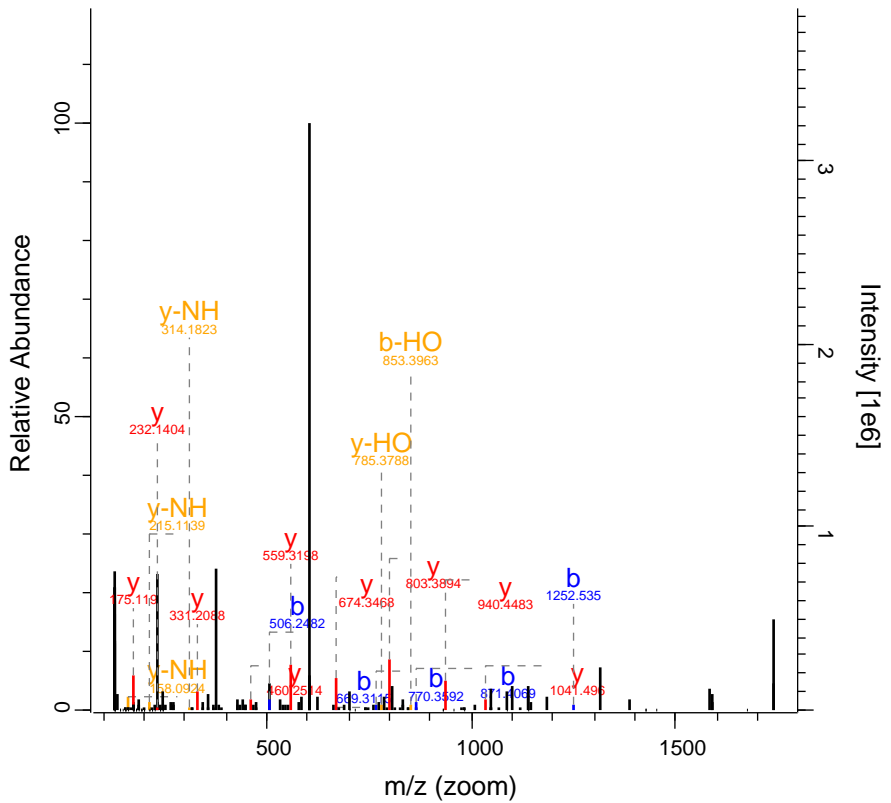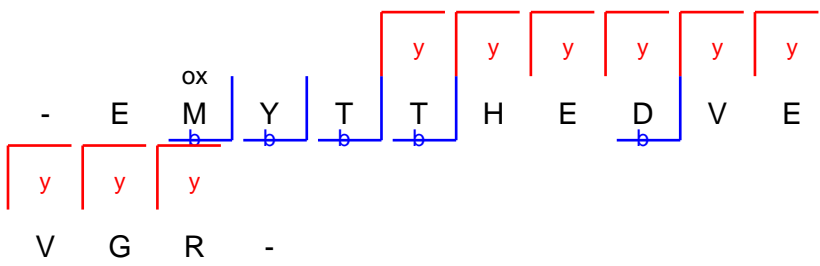

Raw File

Scan Method Score m/z

RO-QC-160121\_ZackD\_SS\_Set\_02\_Fraction\_4

10085 FTMS; HCD 91.91 397.58

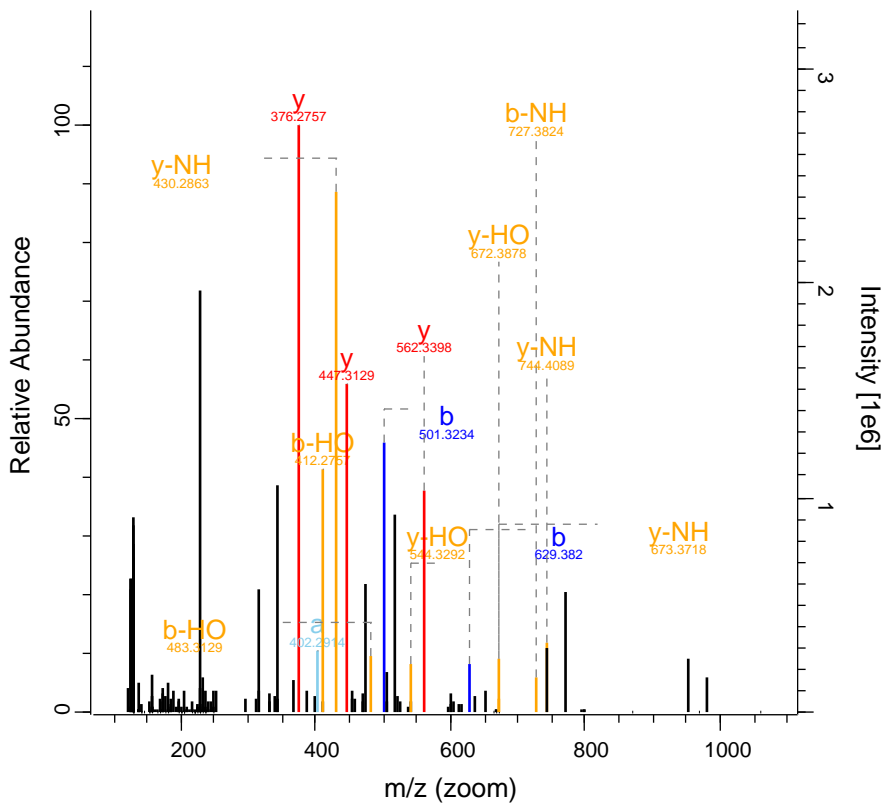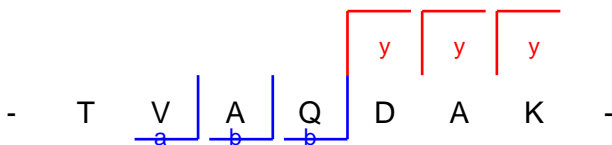

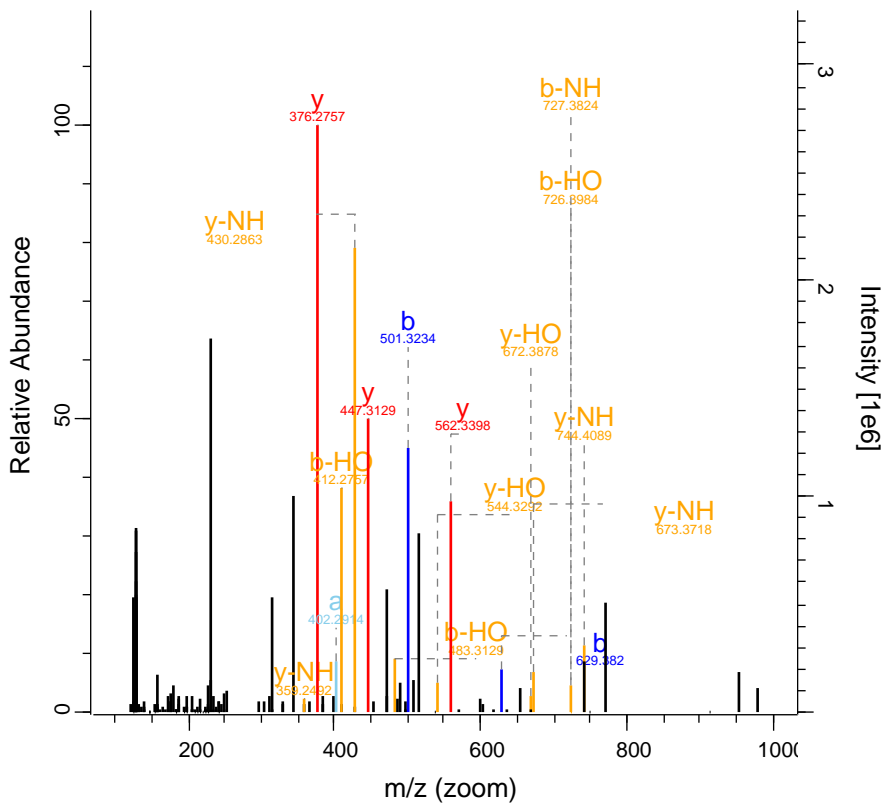

RO-QC-160121\_ZackD\_SS\_Set\_02\_Fraction 10411 FTMS; HC 90.63 373.48 DENND4B

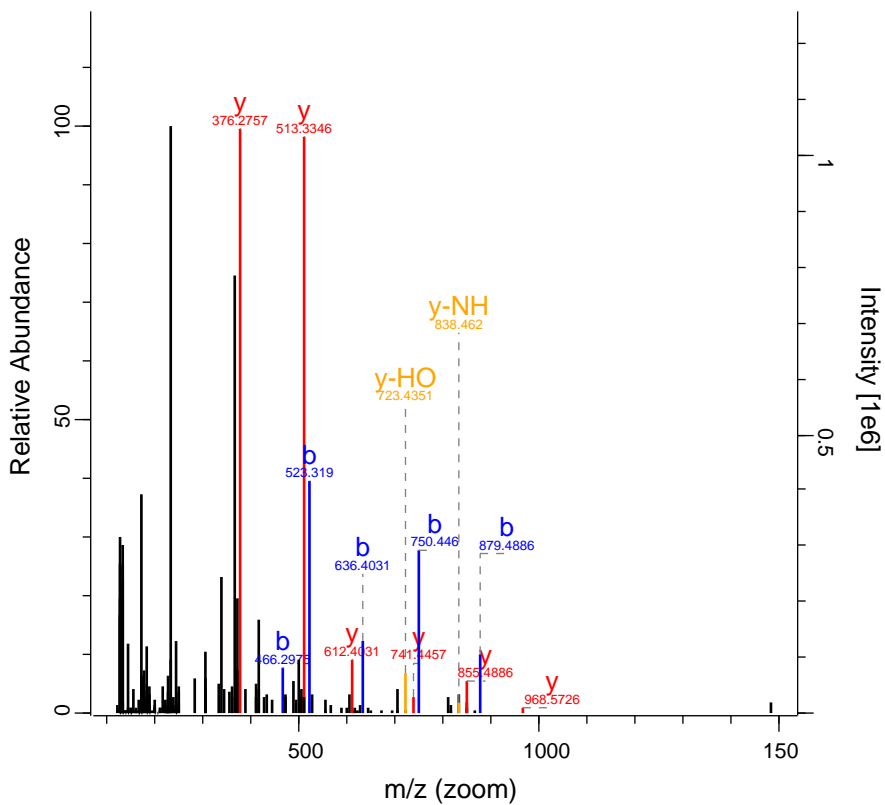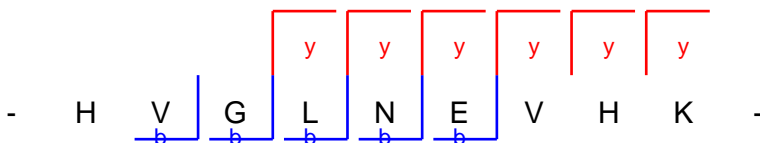

RO-QC-160121\_ZackD\_SS\_Set\_02\_Fractio 10590 FTMS; HC 117.02 695.41 HES1

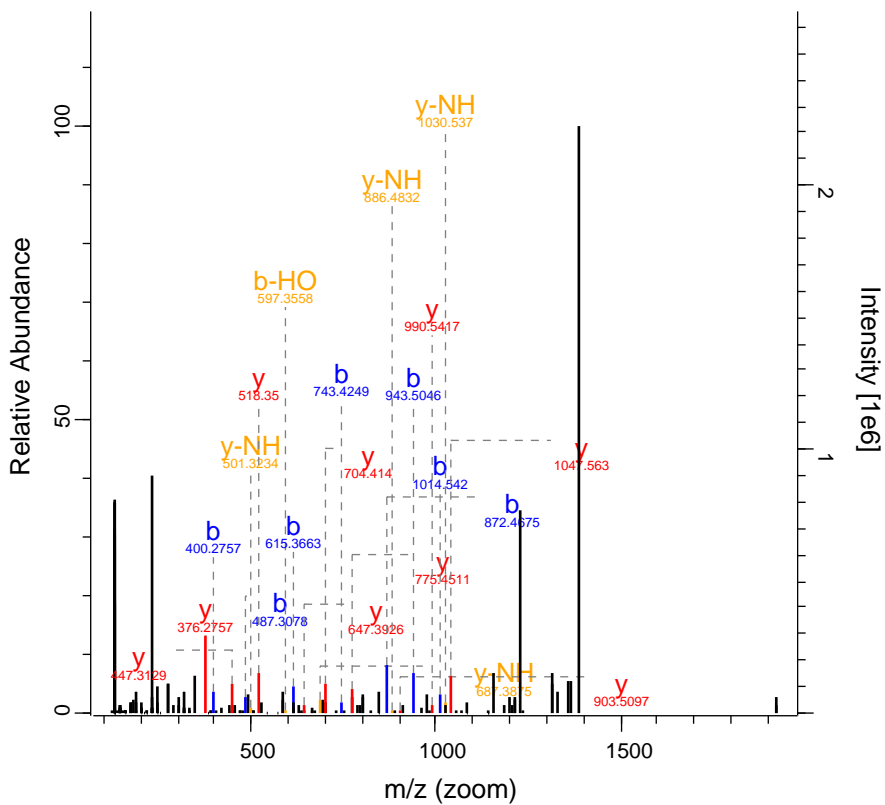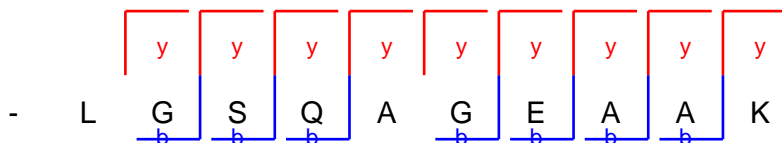

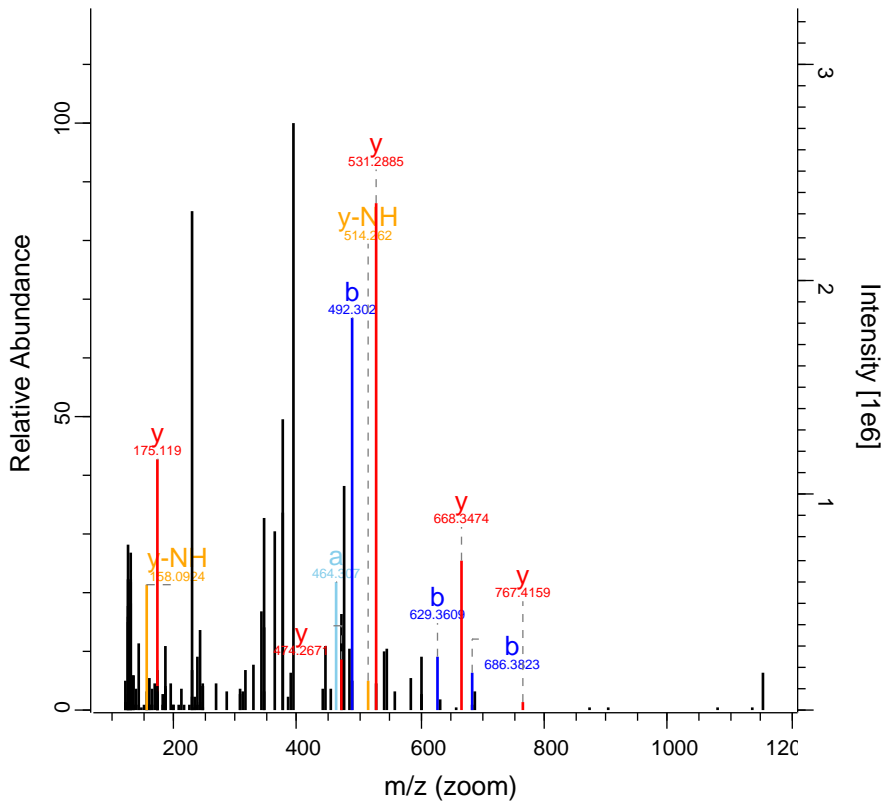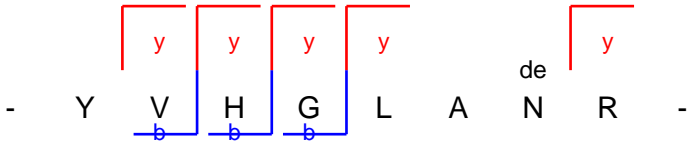

RO-QC-160121\_ZackD\_SS\_Set\_02\_Fraction 11151 FTMS; HC 44.35 943.51 CDCA3

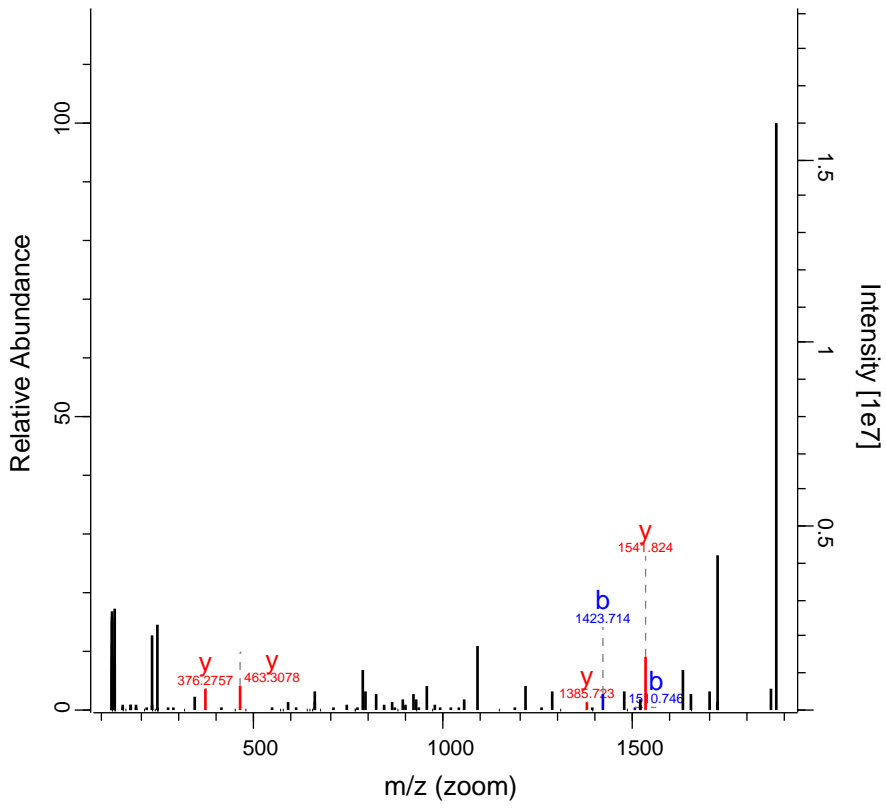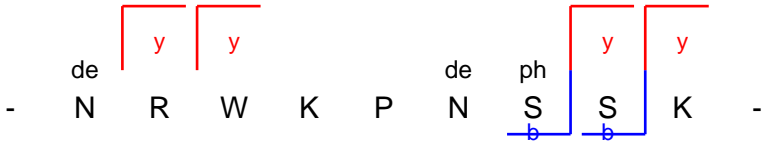





RO-QC-160121\_ZackD\_SS\_Set\_02\_Fraction 11895 FTMS; HC 56.48 671.01 ZER1

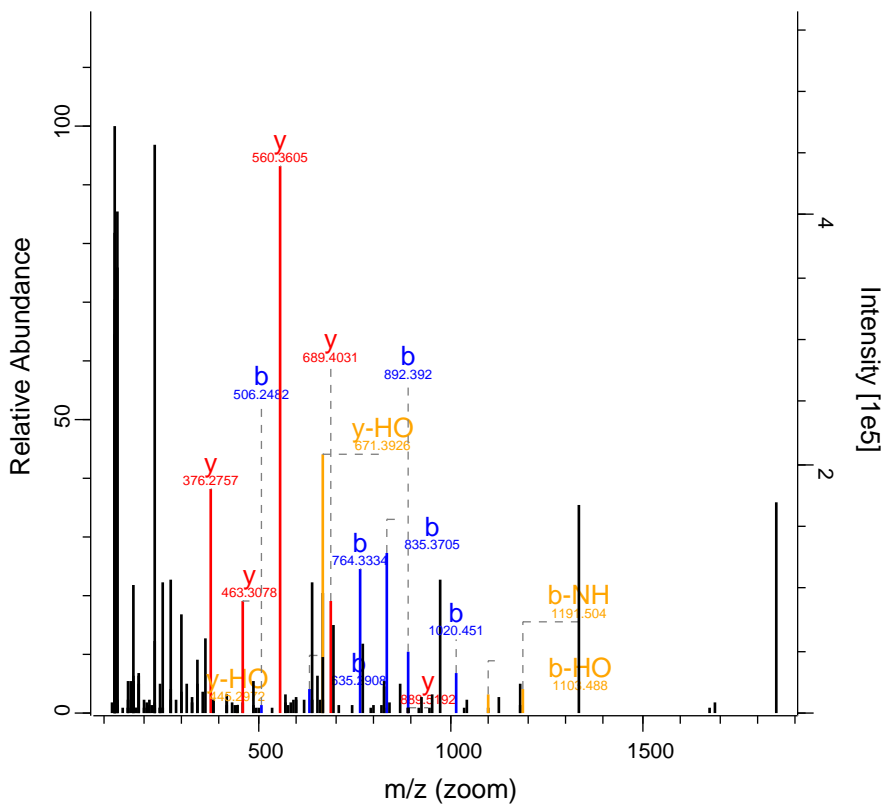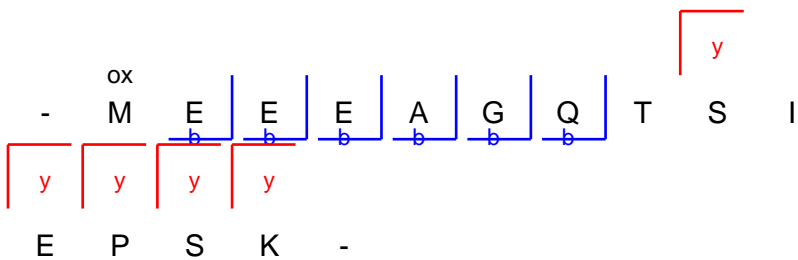

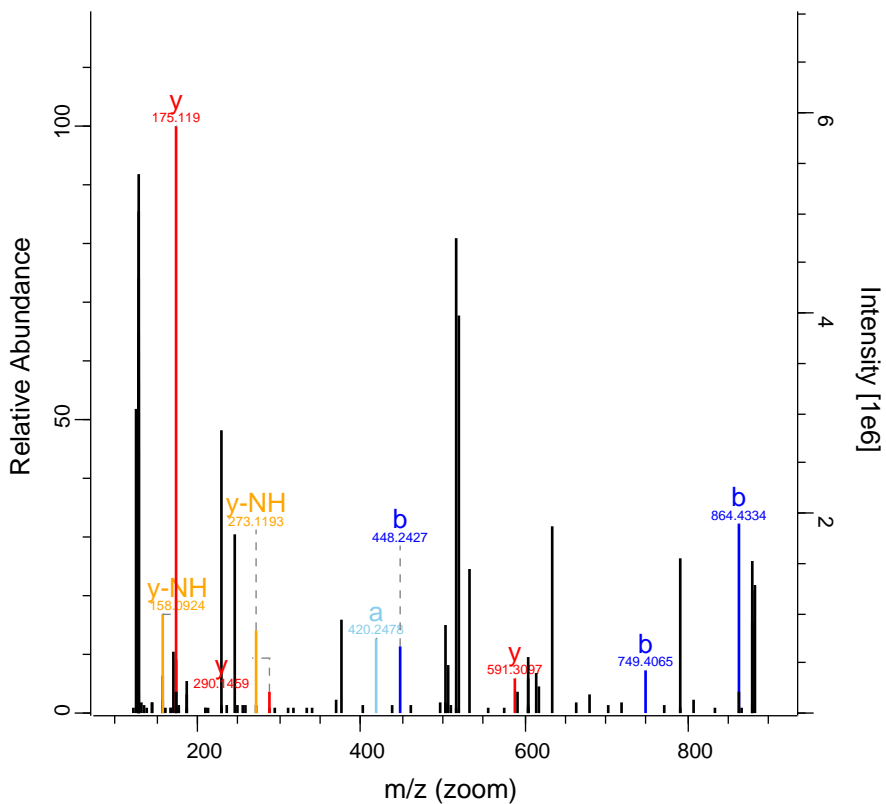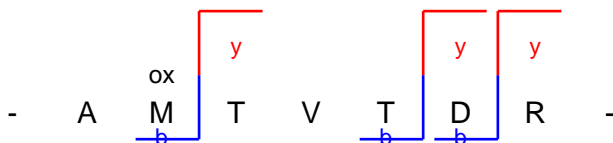

| Raw File                                | Scan  | Method    | Score | m/z    |
|-----------------------------------------|-------|-----------|-------|--------|
| RO-QC-160121_ZackD_SS_Set_02_Fraction_4 | 12061 | FTMS; HCD | 99.38 | 364.86 |

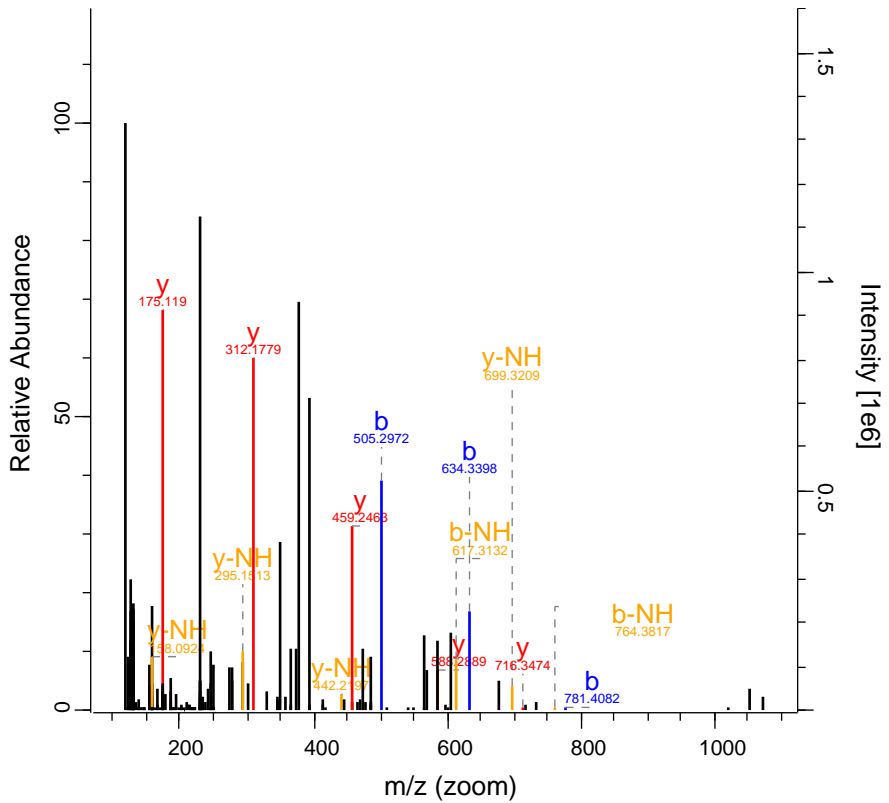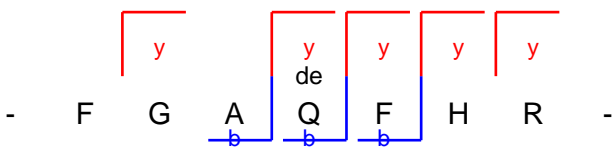

RO-QC-160121\_ZackD\_SS\_Set\_02\_Fraction 14229 FTMS; HC 84.5 824.47 AIPL1

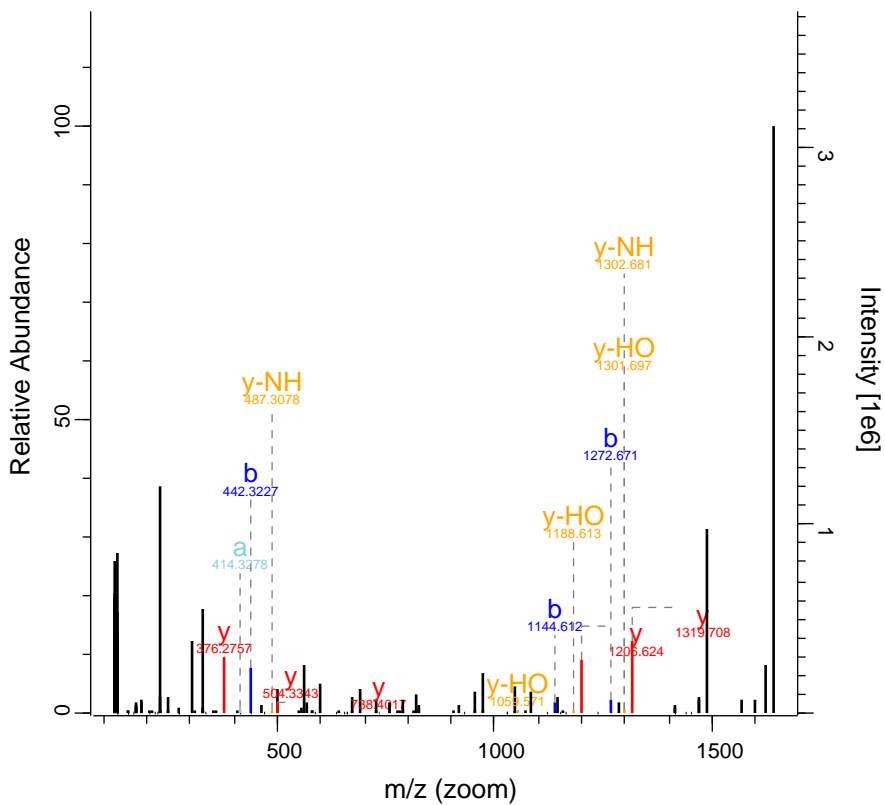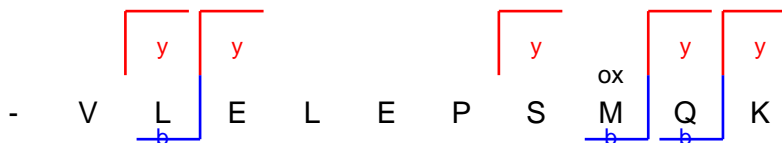

Raw File Scan Method Score m/z

RO-QC-160121\_ZackD\_SS\_Set\_02\_Fraction\_4 14359 FTMS; HCD 68.91 742.88

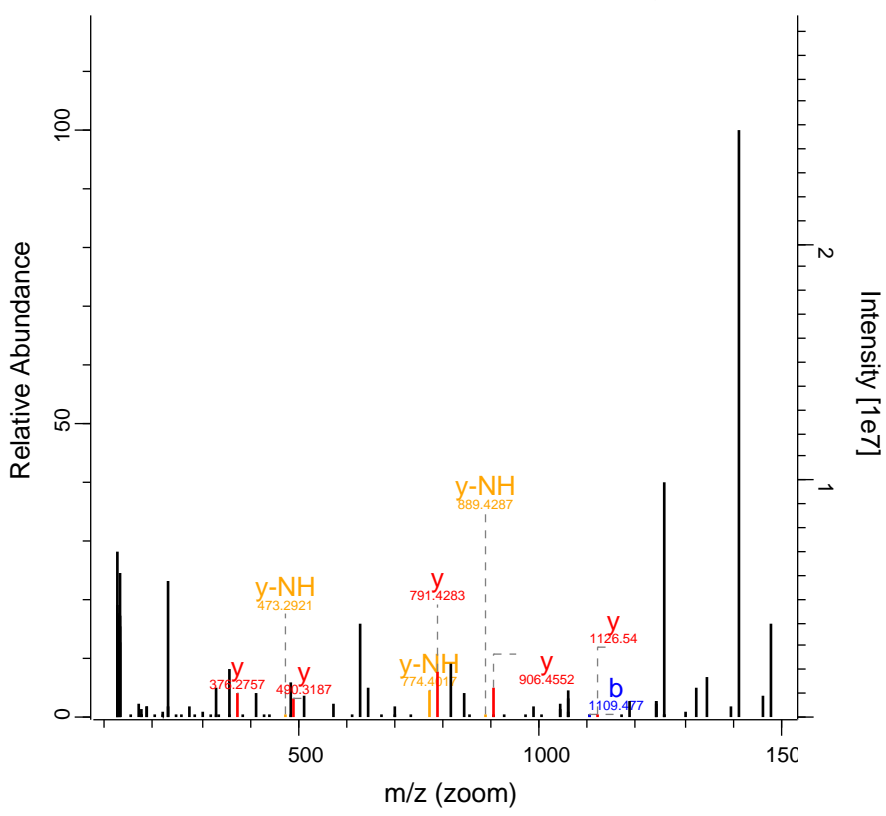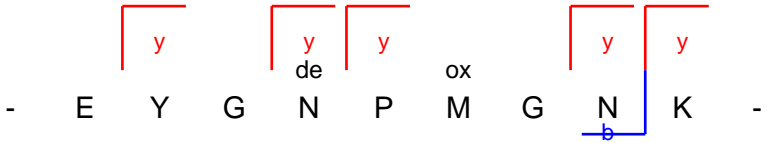

RO-QC-160121\_ZackD\_SS\_Set\_02\_Fraction 14453 FTMS; HC 85.21 824.47 AIPL1

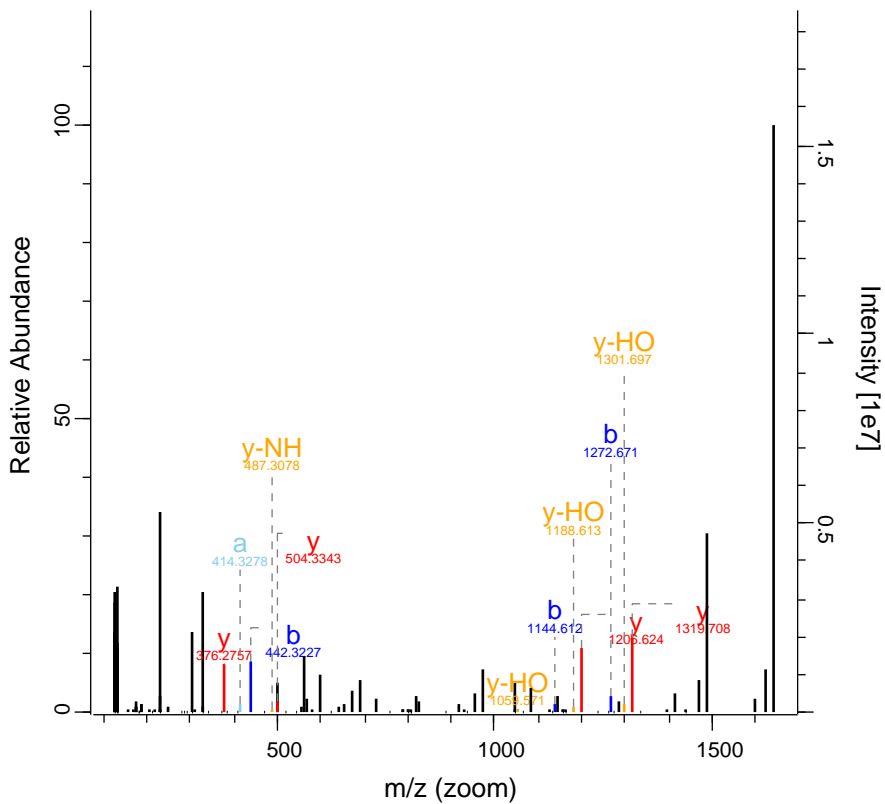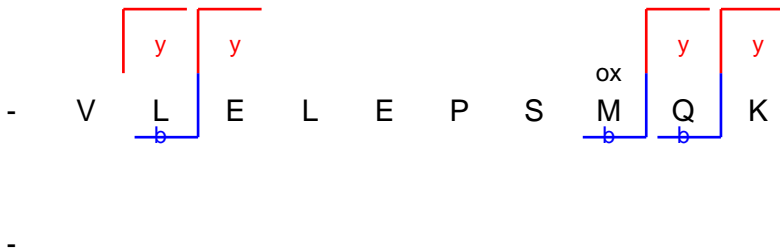

RO-QC-160121\_ZackD\_SS\_Set\_02\_Fraction 15033 FTMS; HC 70.91 714.85 EID2

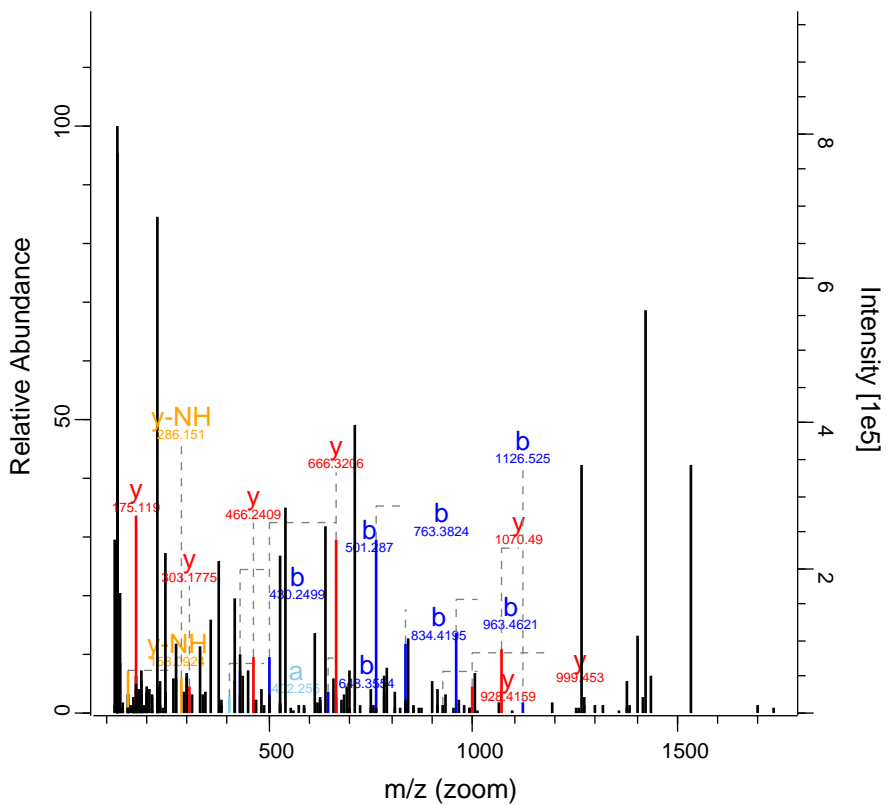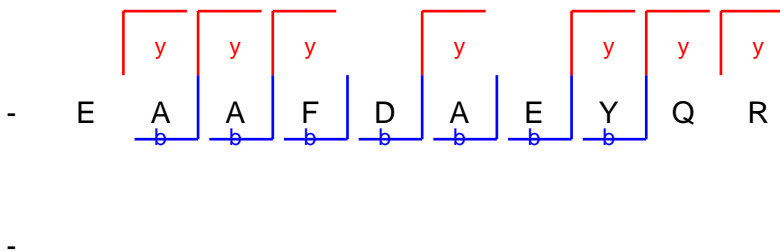



Raw File

Scan

Method

Score

m/z

RO-QC-160121\_ZackD\_SS\_Set\_02\_Fraction\_4

16231

FTMS; HCD

71.38

767.43

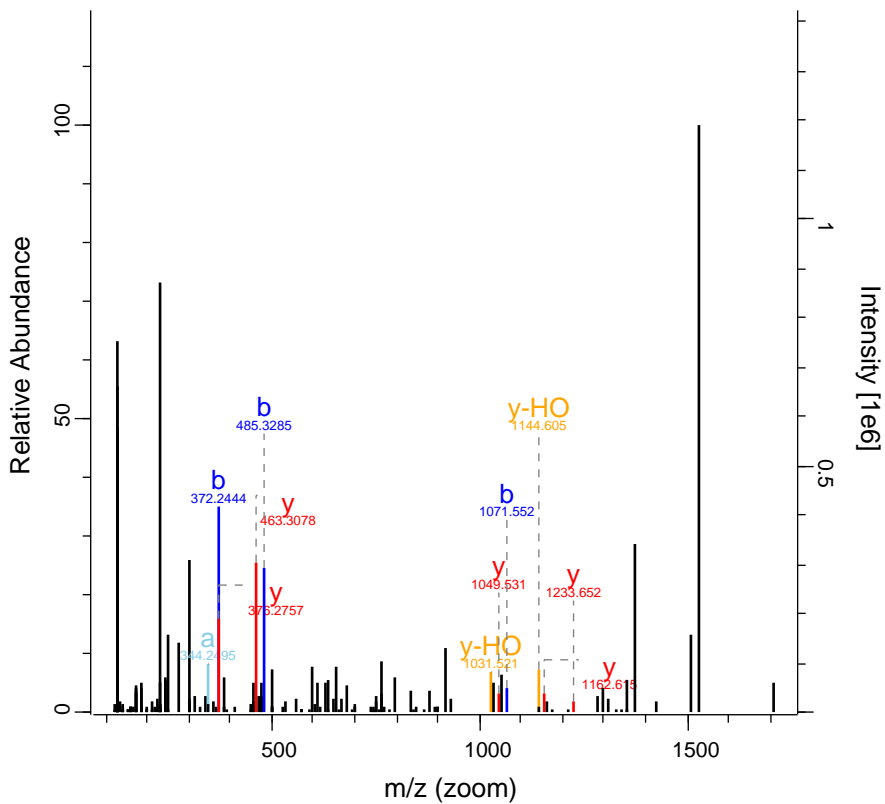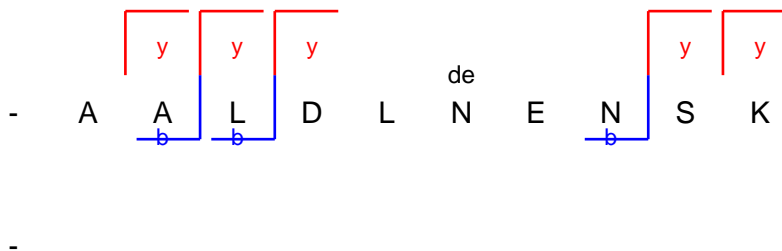



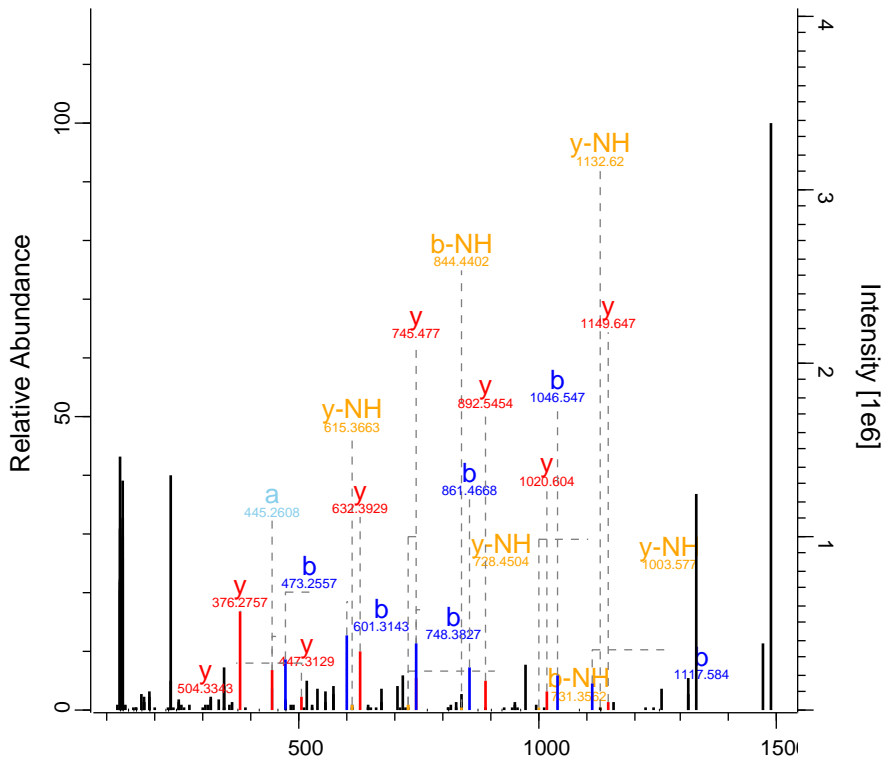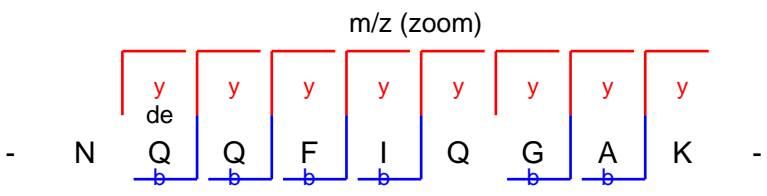



RO-QC-160121\_ZackD\_SS\_Set\_02\_Fraction 17161 FTMS; HC 50.22 623.34 TBPL1

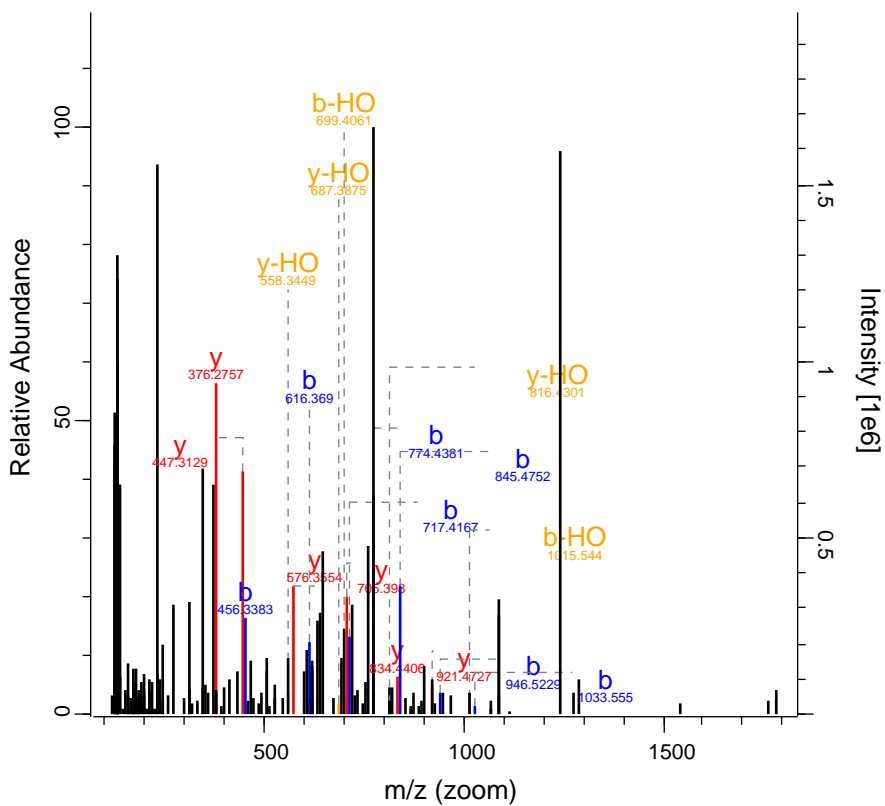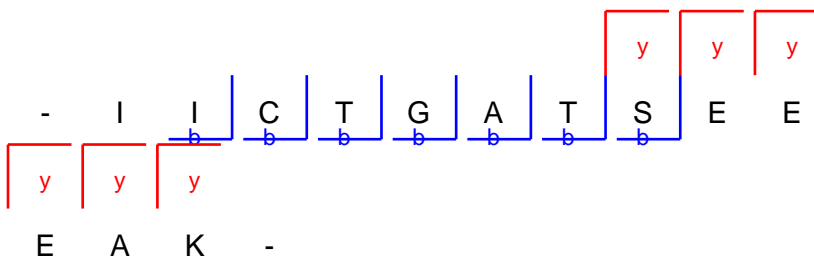

RO-QC-160121\_ZackD\_SS\_Set\_02\_Fractio 17294 FTMS; HC 111.61 713.94 SYS1

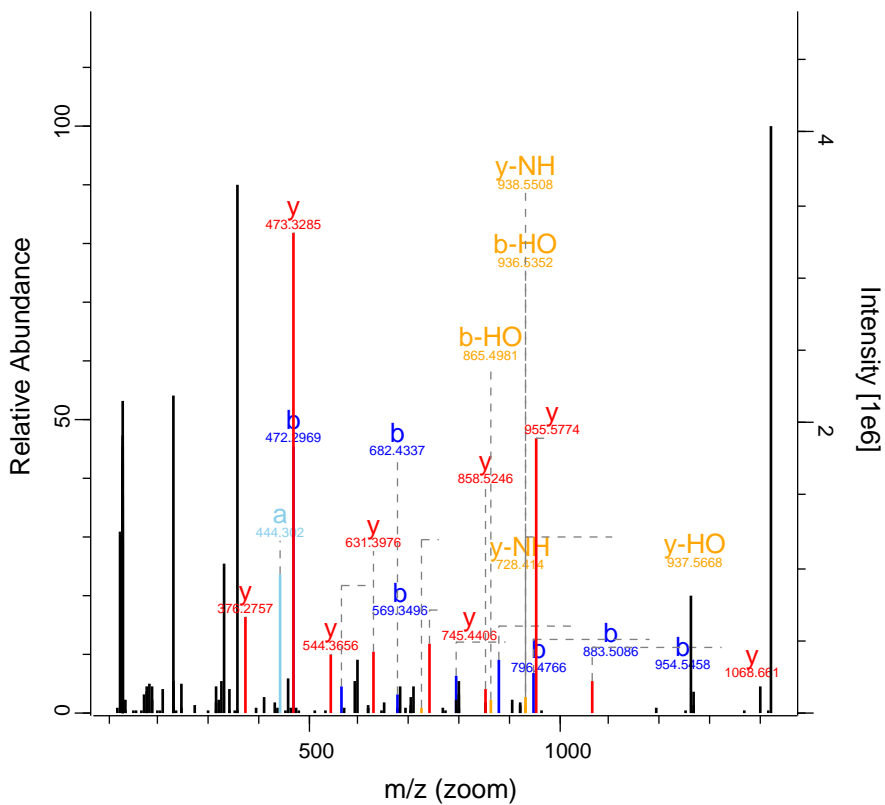

RO-QC-160121\_ZackD\_SS\_Set\_02\_Fraction 17343 FTMS; HC 80.69 476.29 SYS1

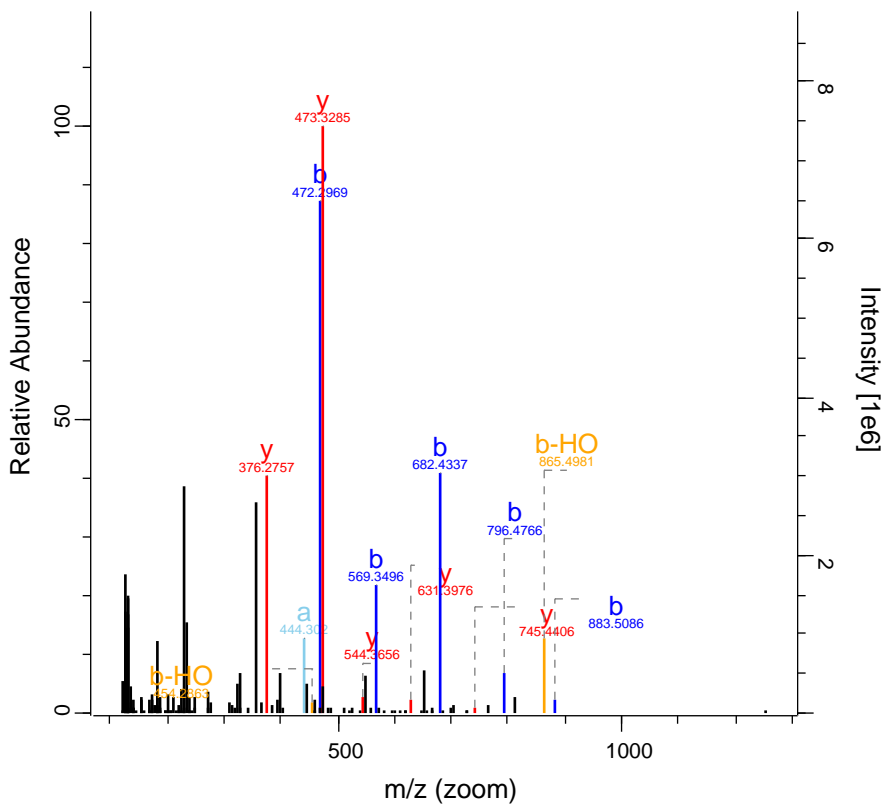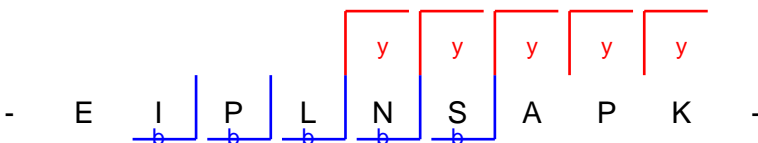

RO-QC-160121\_ZackD\_SS\_Set\_02\_Fraction17492 FTMS; HC 67.87 804.72 TTF1

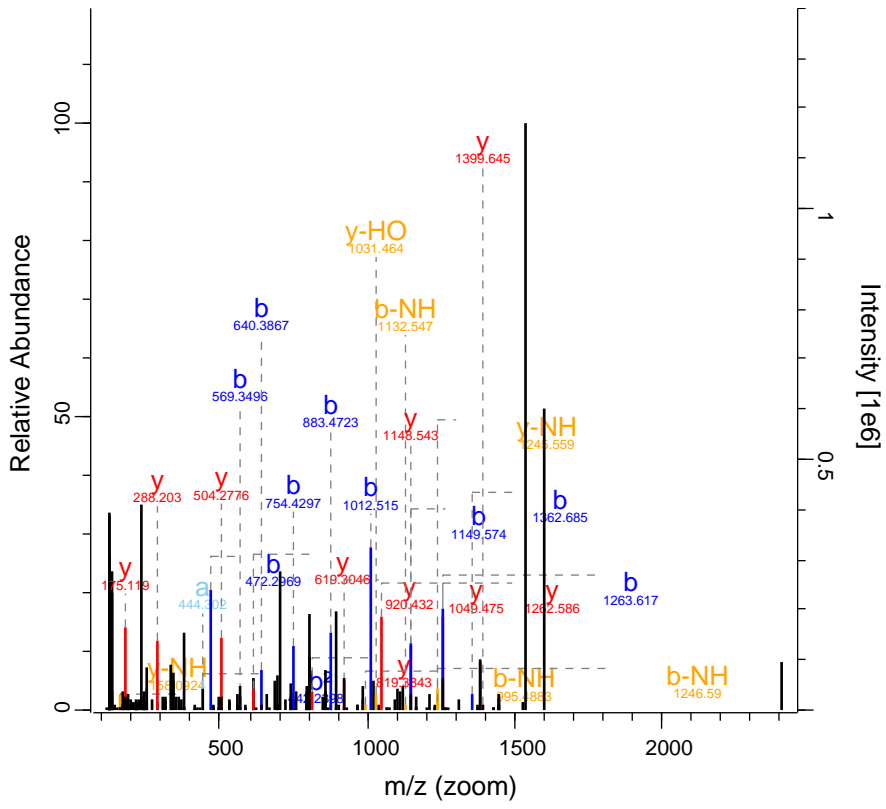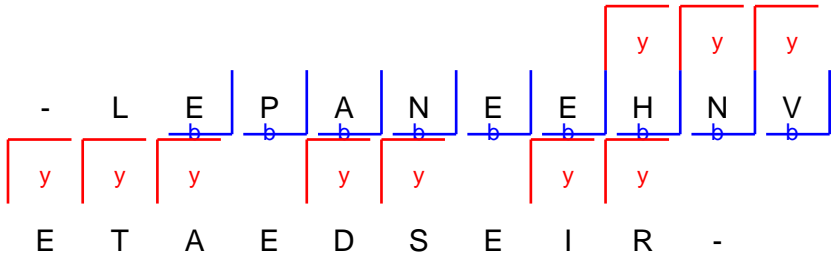



RO-QC-160121\_ZackD\_SS\_Set\_02\_Fraction17531 FTMS; HC 98.04 713.94 SYS1

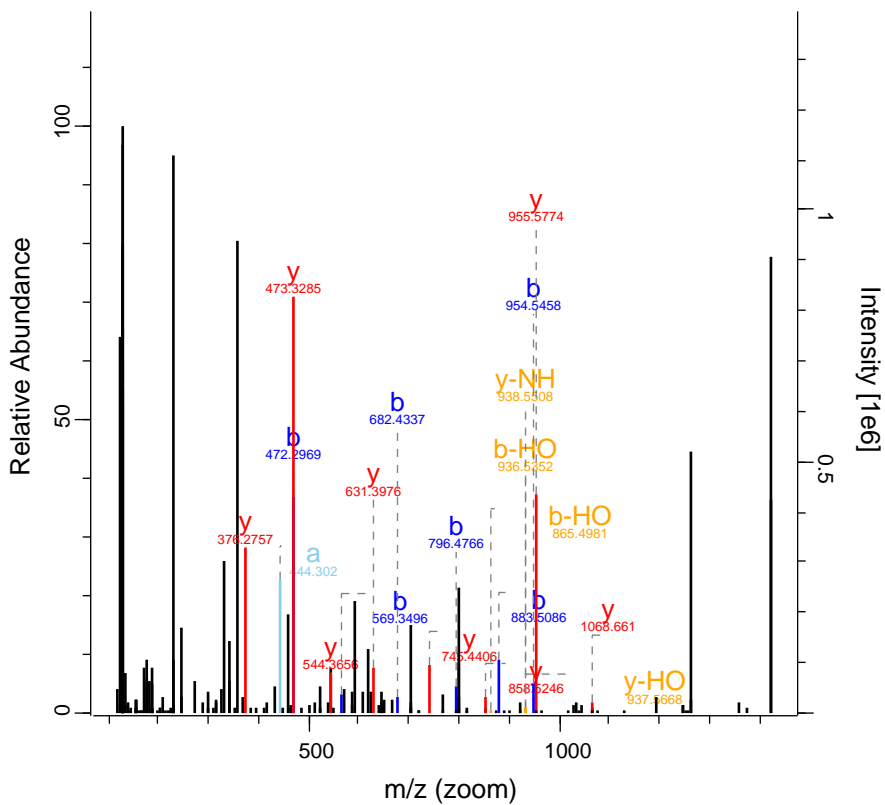

m/z (zoom)

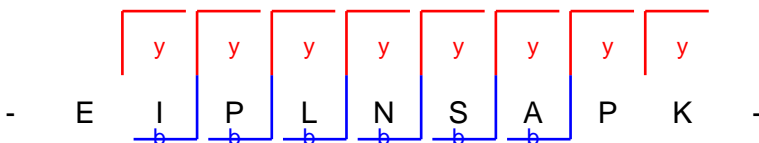

RO-QC-160121\_ZackD\_SS\_Set\_02\_Fratio 17844 FTMS; HC 123.36 782.09 MED31

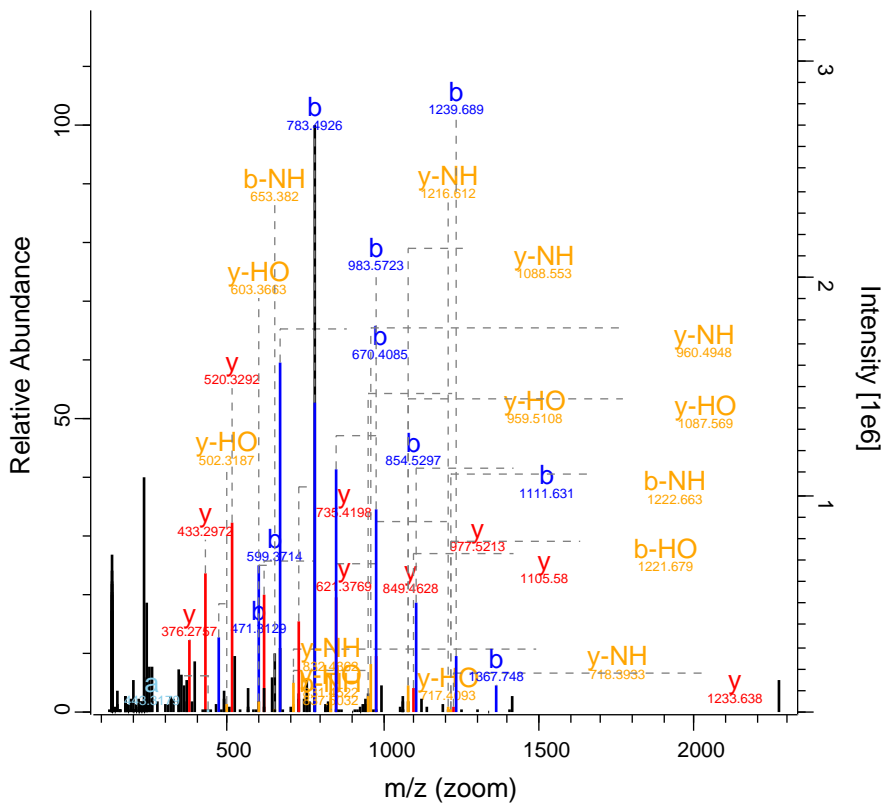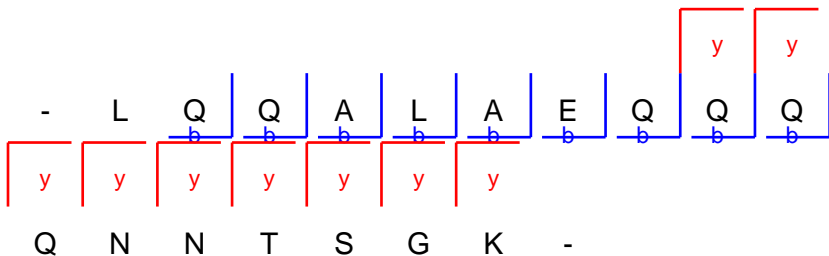



RO-QC-160121\_ZackD\_SS\_Set\_02\_Fraction 18605 FTMS; HC 80.78 865.46 CBY1

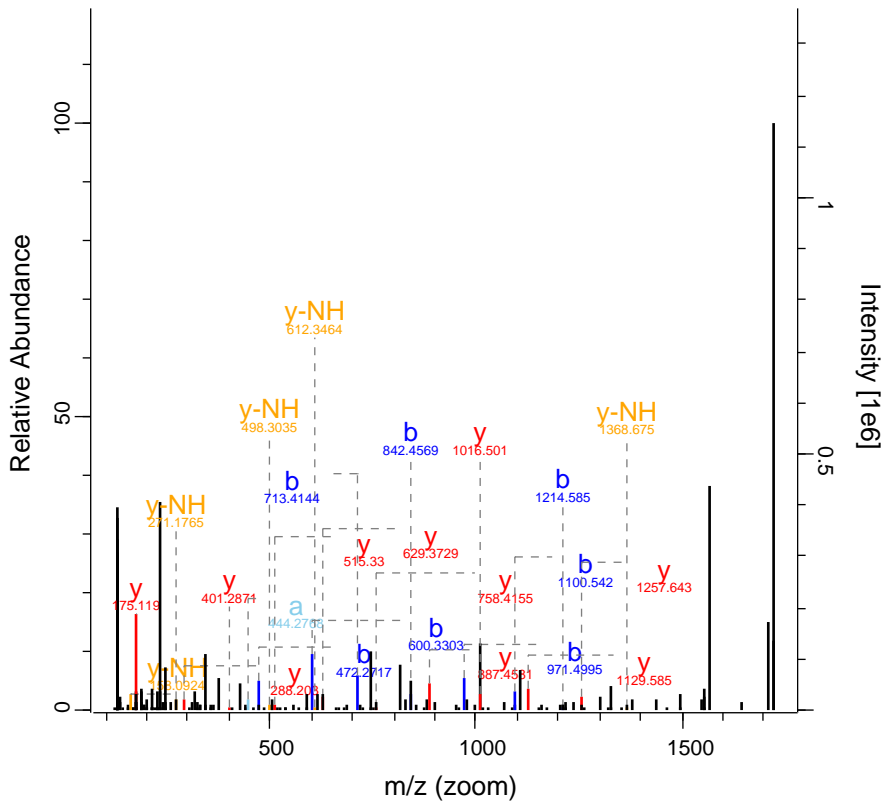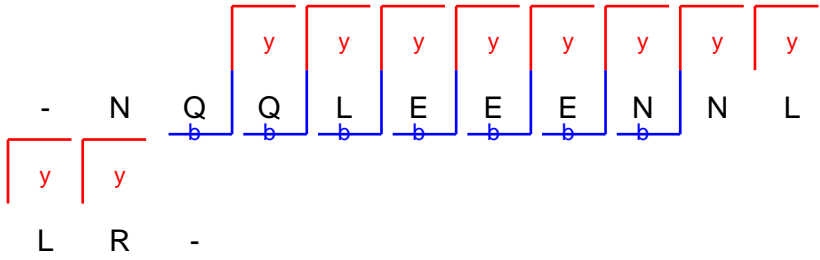

L R -

RO-QC-160121\_ZackD\_SS\_Set\_02\_Fractic 18623 FTMS; HC 66.69 1029.98 ZNF215

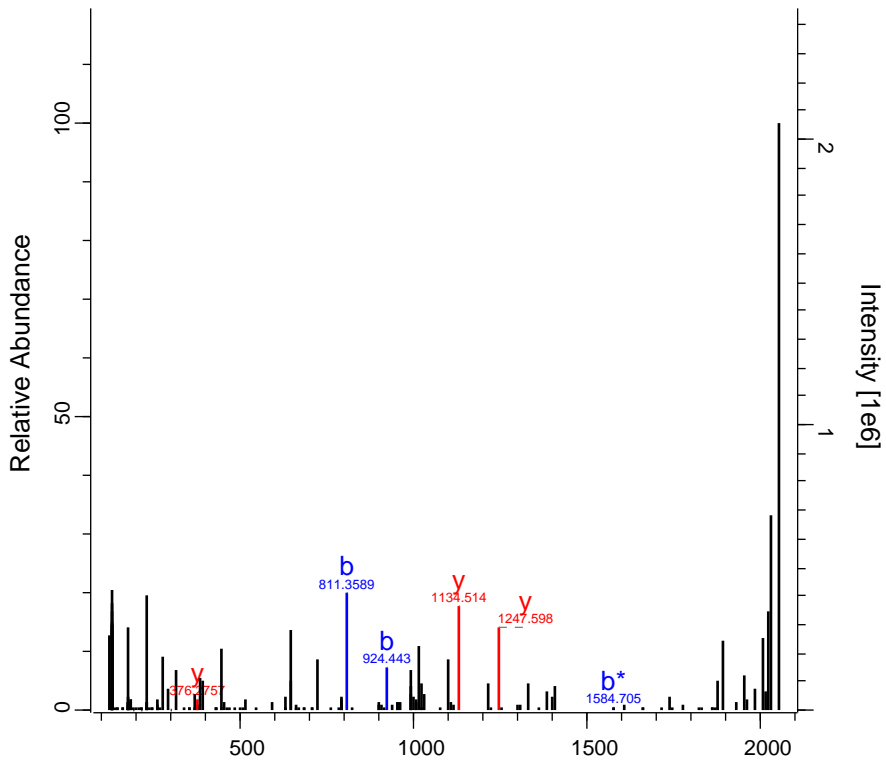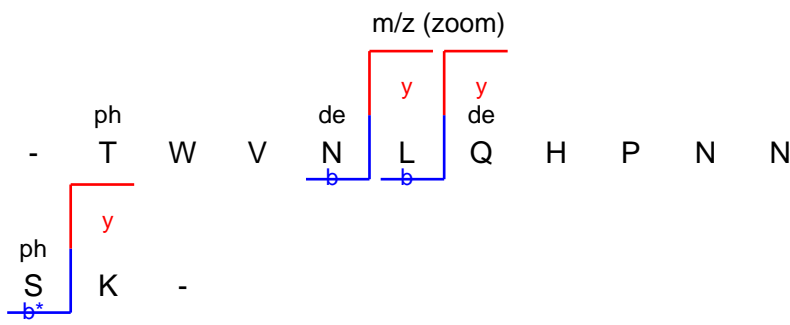

ph  
S  
b\*

ph  
T  
W  
V  
N  
L  
Q  
H  
P  
N  
N

de  
y  
y  
de

b  
b  
b

RO-QC-160121\_ZackD\_SS\_Set\_02\_Fraction 18845 FTMS; HC 48.44 594.62 EXOC3L1

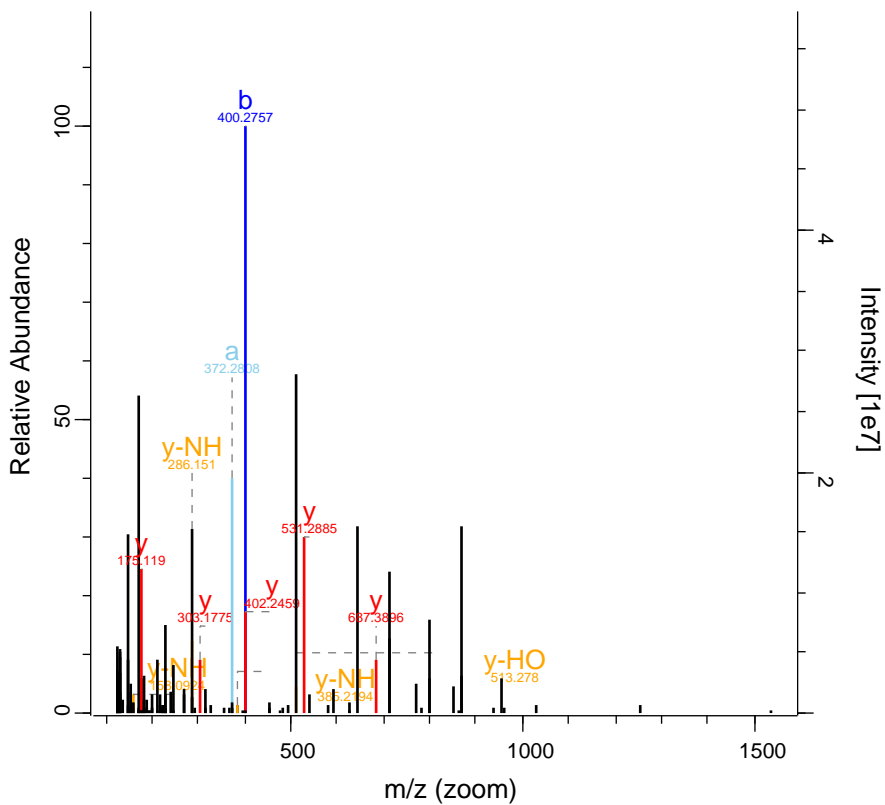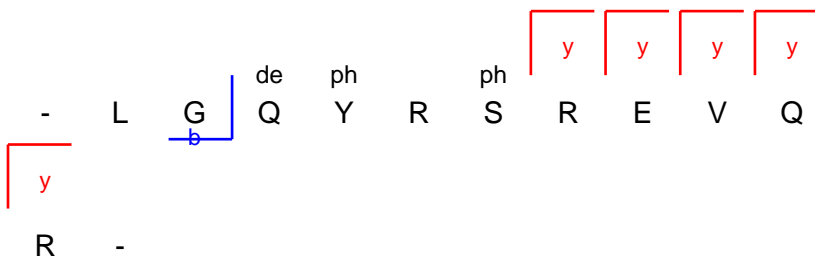



RO-QC-160121\_ZackD\_SS\_Set\_02\_Fractio 19563 FTMS; HC 112.34 805.08 CDC42SE2

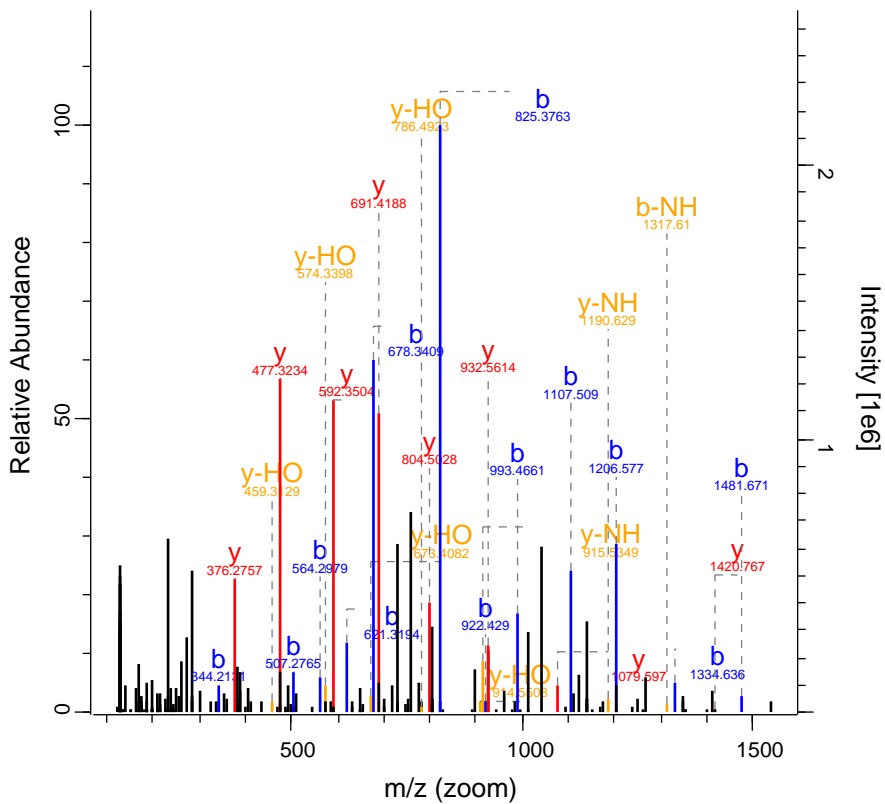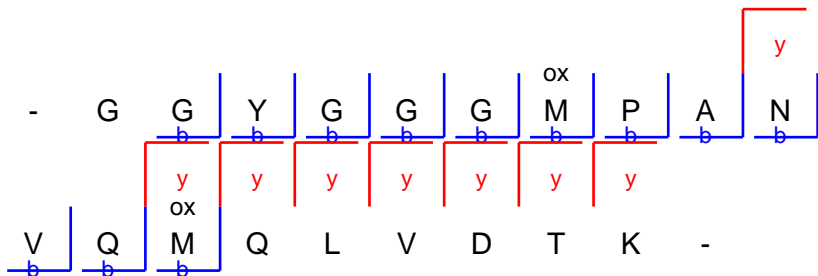





RO-QC-160121\_ZackD\_SS\_Set\_02\_Fractio 19785 FTMS; HC 111.78 805.42 CDC42SE2

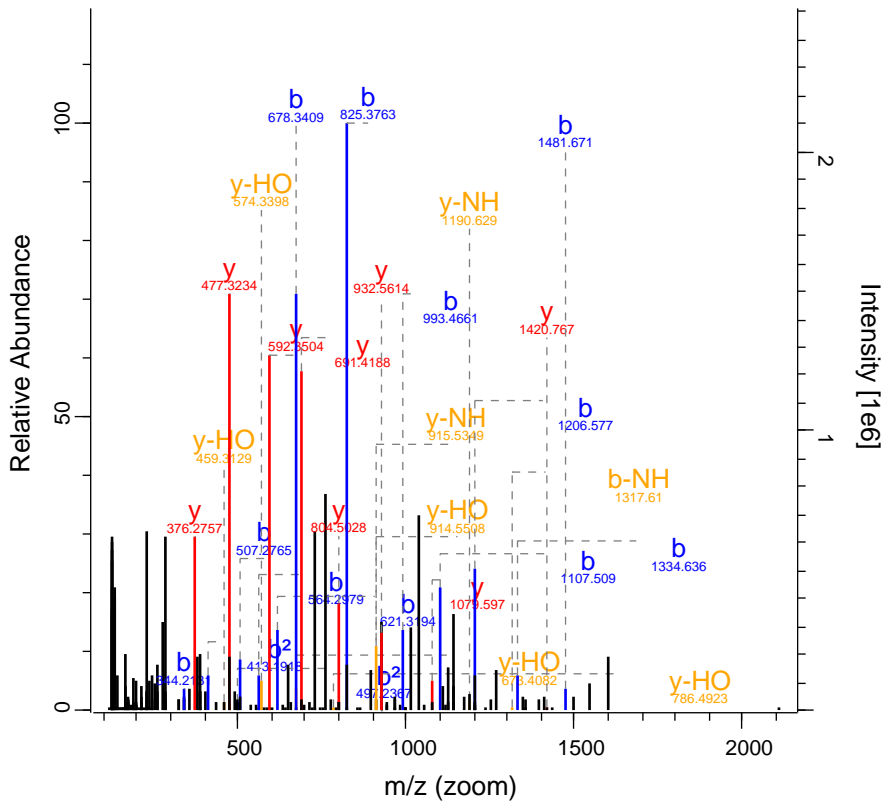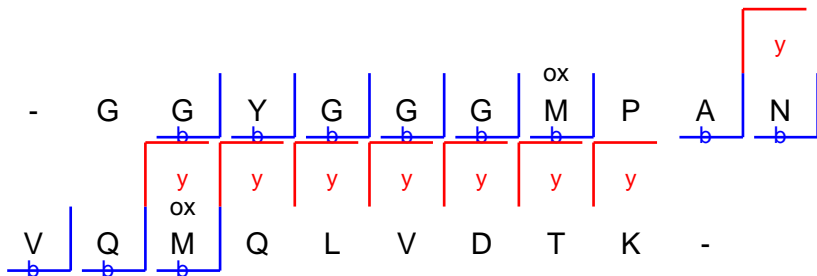

RO-QC-160121\_ZackD\_SS\_Set\_02\_Fraction 20223 FTMS; HC 59.51 860.11 SLC31A1

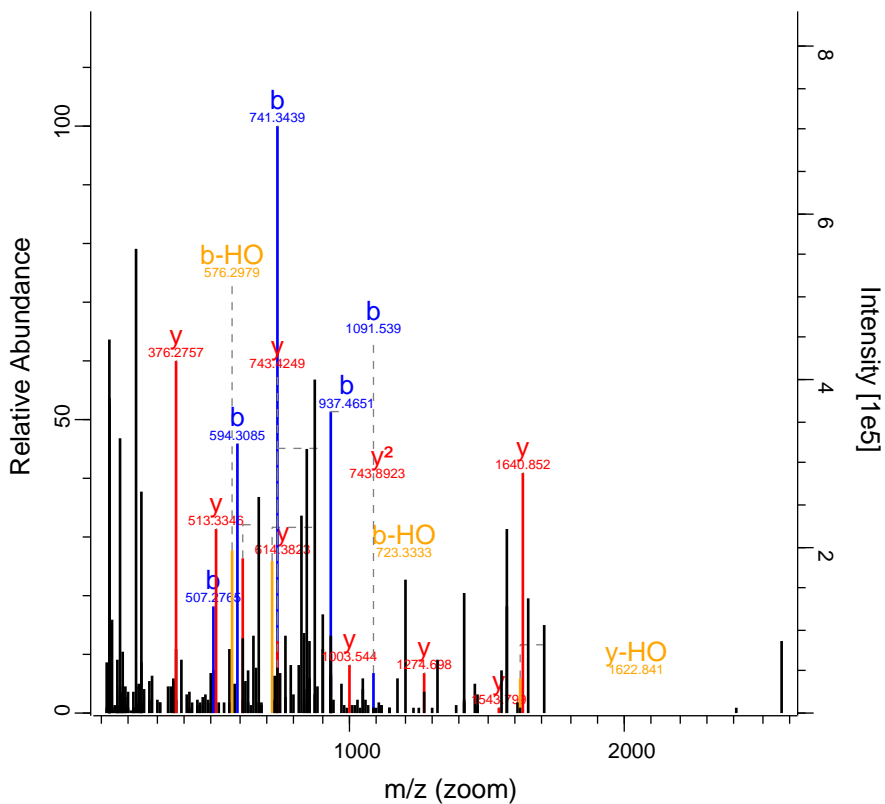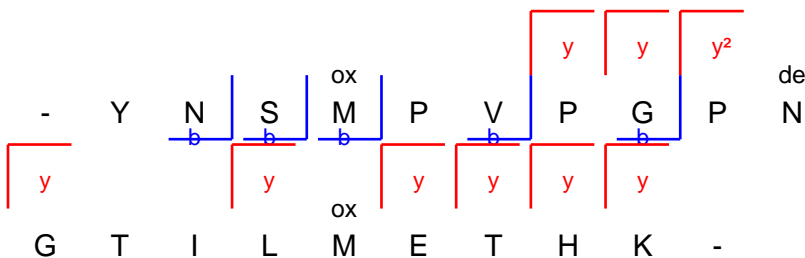

RO-QC-160121\_ZackD\_SS\_Set\_02\_Fraction 20303 FTMS; HC 99.22 807.95 DMWD

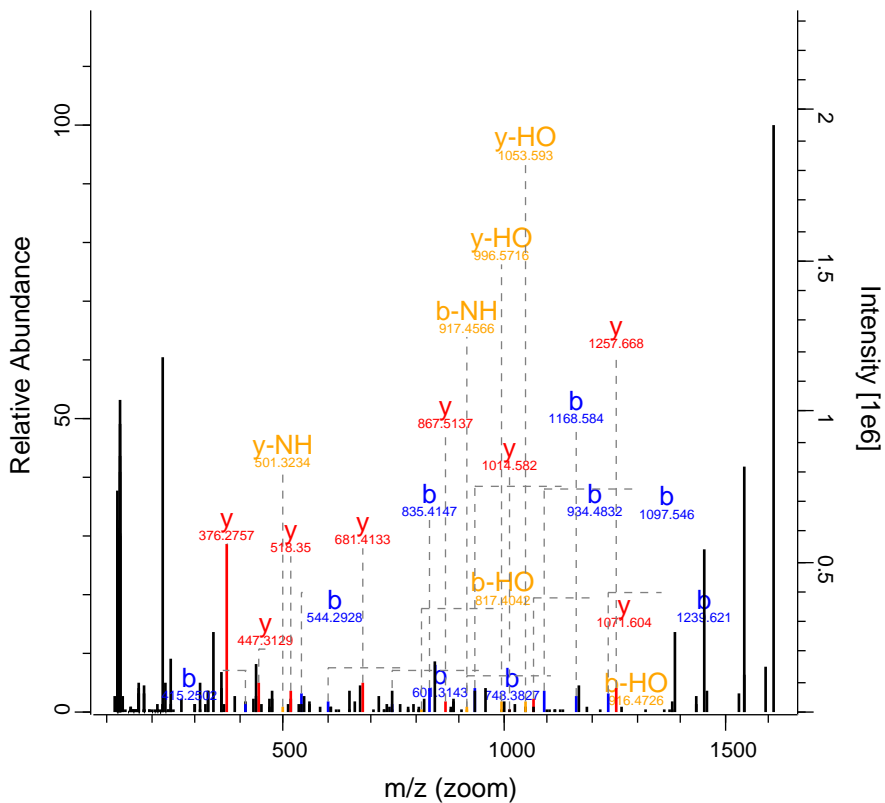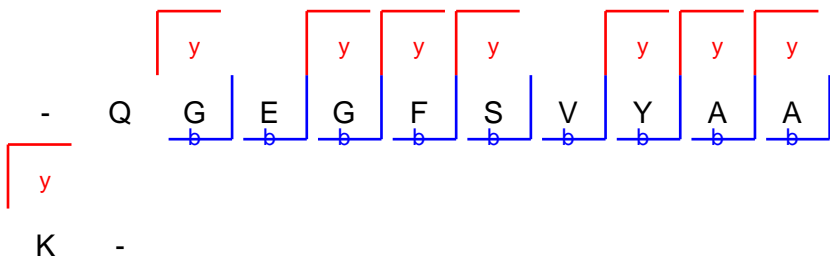

RO-QC-160121\_ZackD\_SS\_Set\_02\_Fraction 20318 FTMS; HCl 54.76 530.8 ZIK1

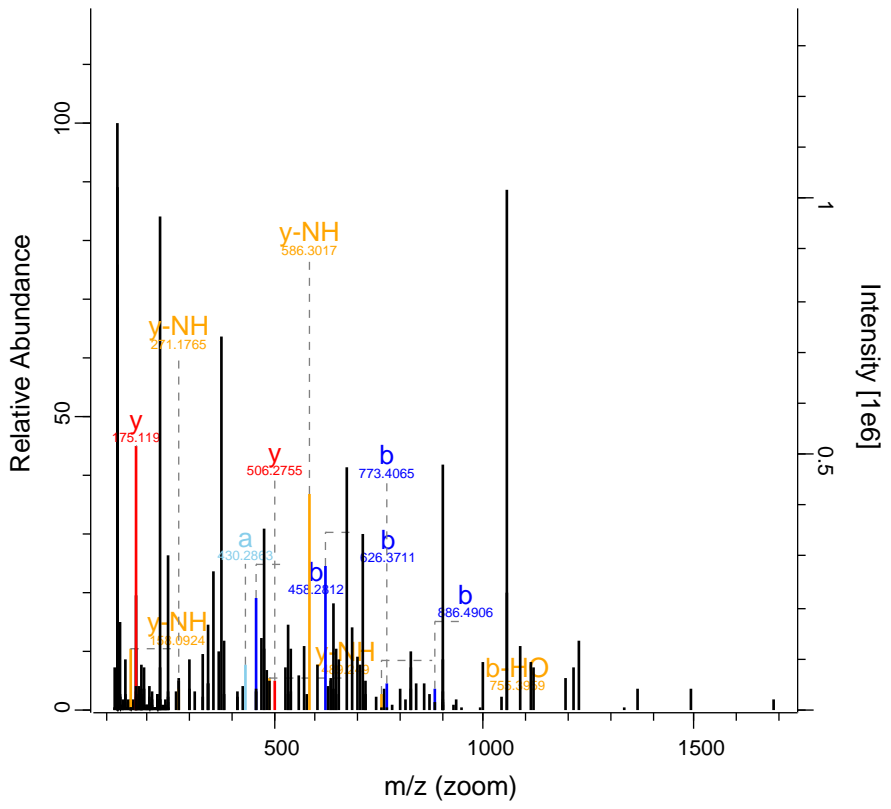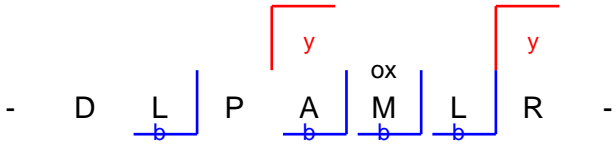

RO-QC-160121\_ZackD\_SS\_Set\_02\_Fraction 20339 FTMS; HC 47.29 942.49 DYRK4

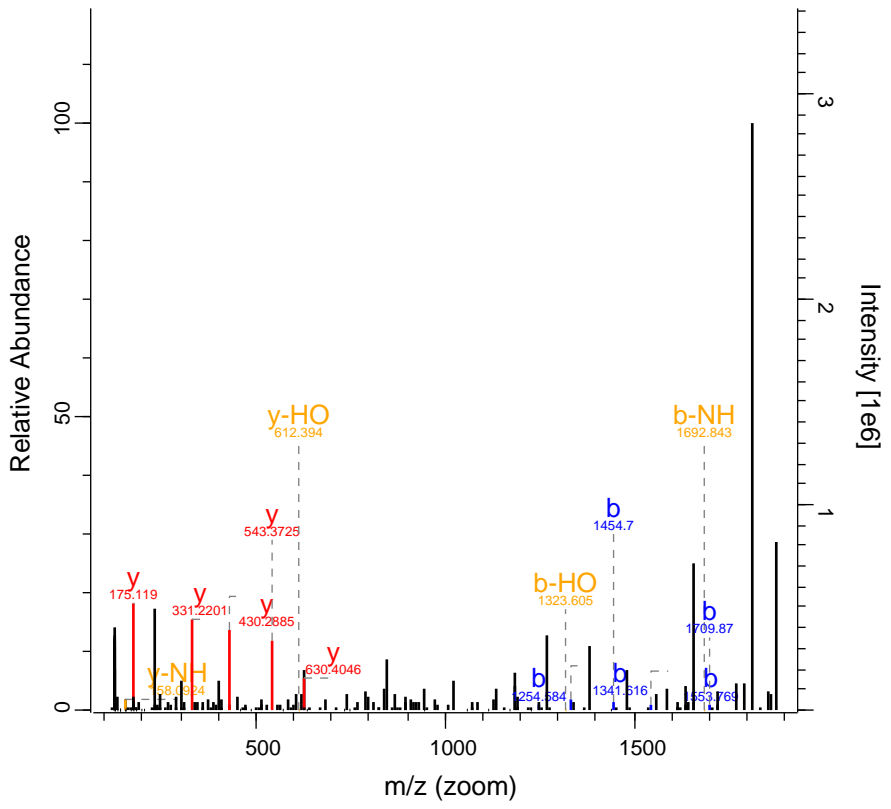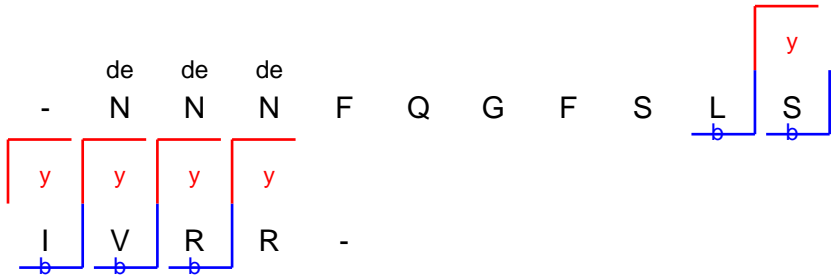

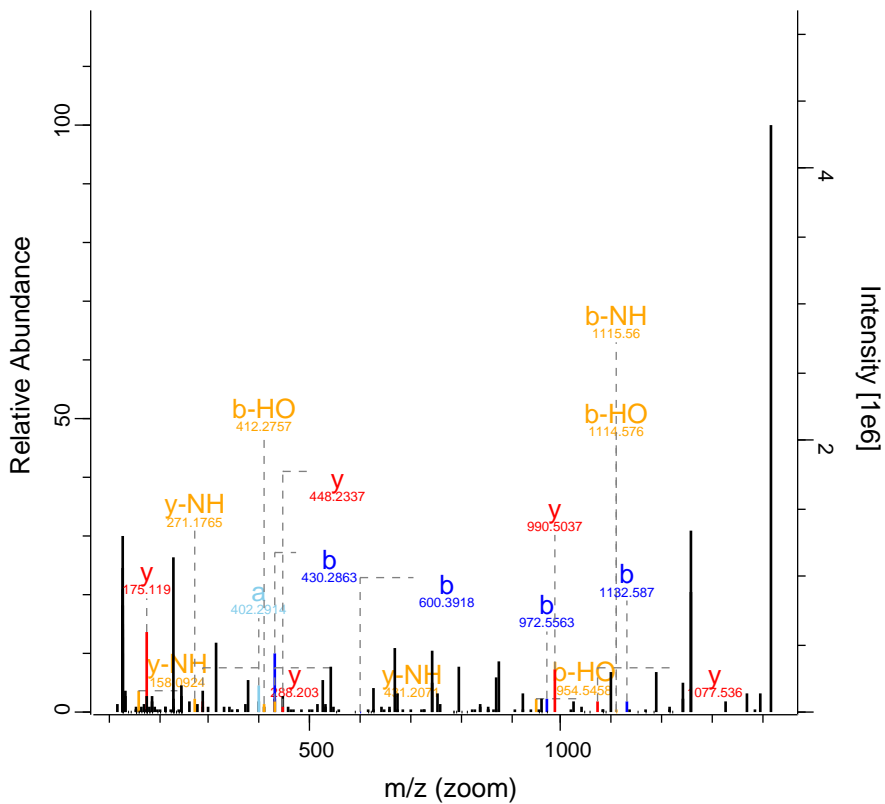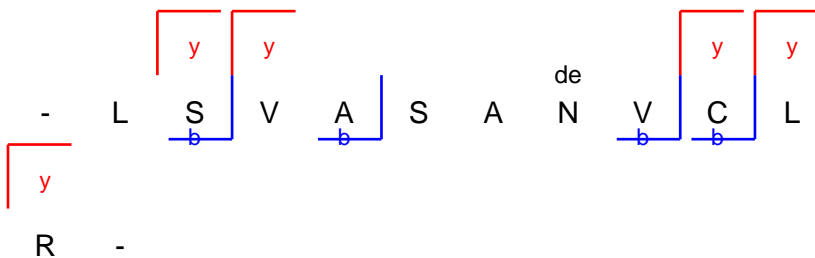

R -

RO-QC-160121\_ZackD\_SS\_Set\_02\_Fraction 20439 FTMS; HC 69.36 860.11 SLC31A1

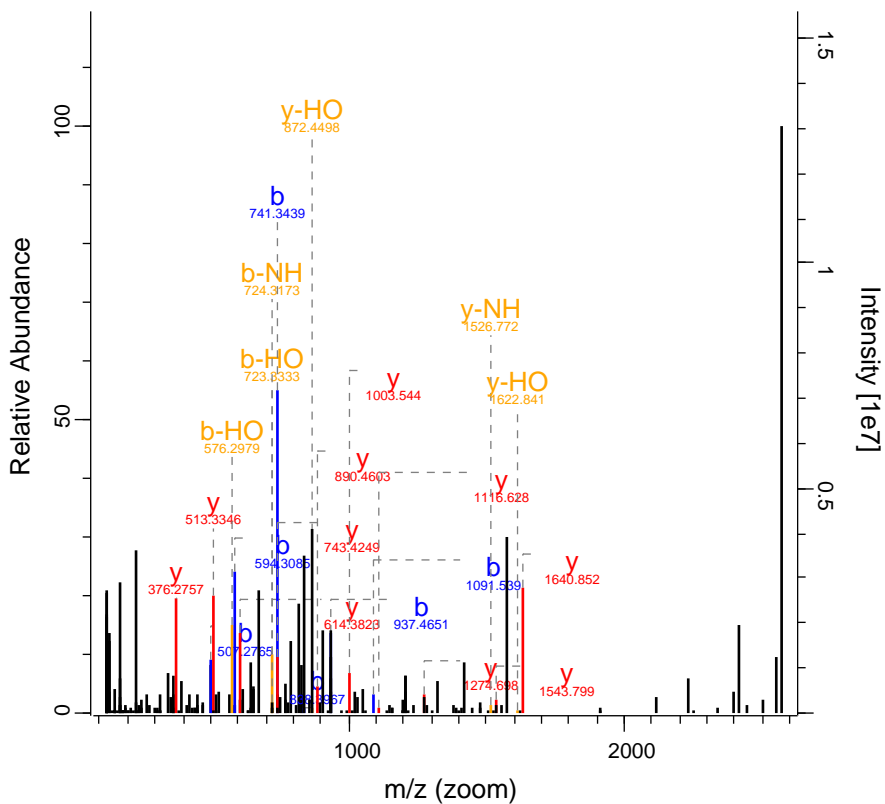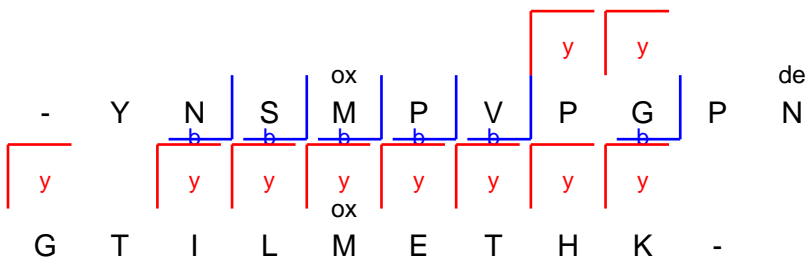



RO-QC-160121\_ZackD\_SS\_Set\_02\_Fractic 20635 FTMS; HC 64.04 1029.98 ZNF215

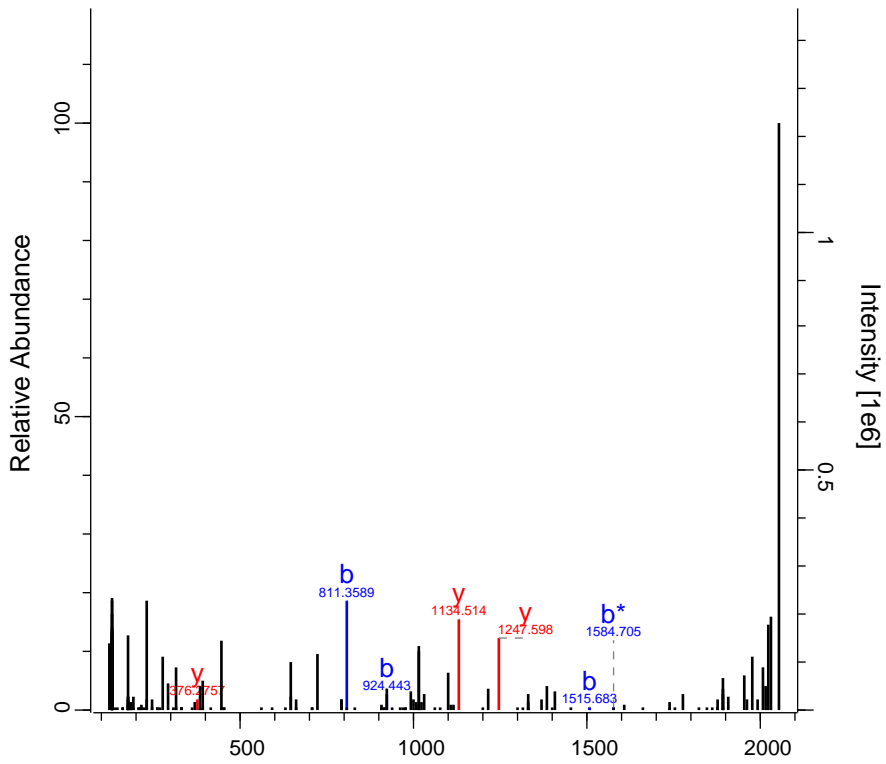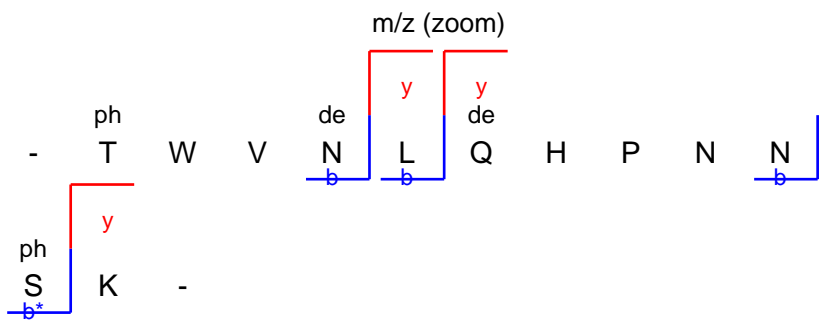



| Raw File                                | Scan  | Method    | Score | m/z    |
|-----------------------------------------|-------|-----------|-------|--------|
| RO-QC-160121_ZackD_SS_Set_02_Fraction_4 | 21055 | FTMS; HCD | 42.8  | 549.99 |

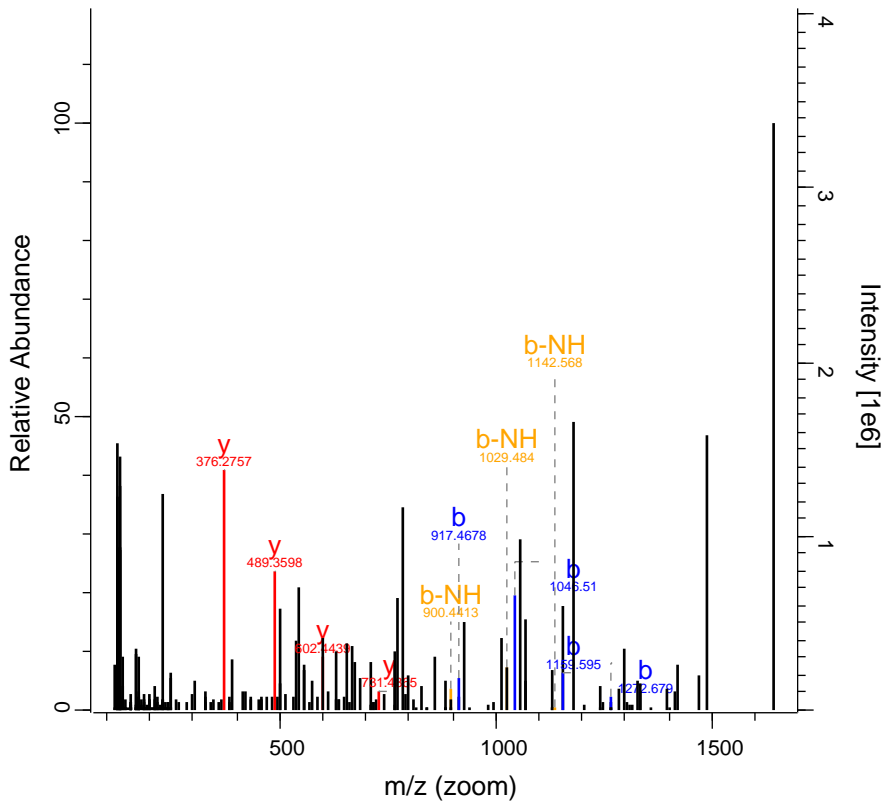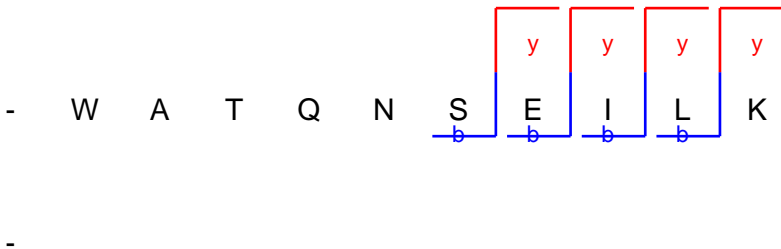

RO-QC-160121\_ZackD\_SS\_Set\_02\_Fraction 21162 FTMS; HCl 53.97 712.4 STAP1

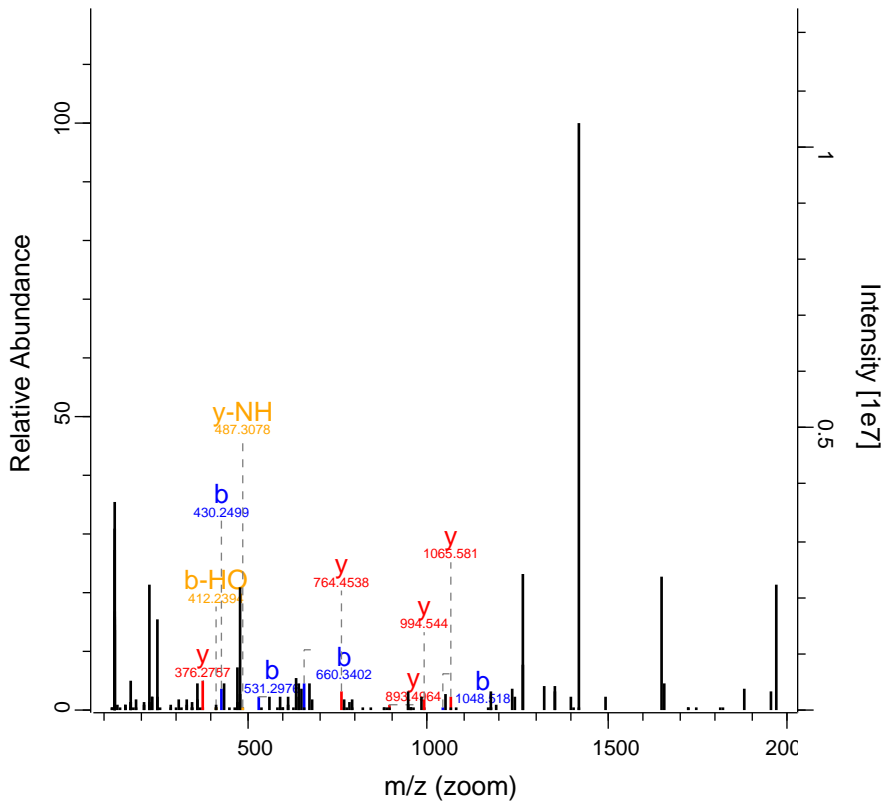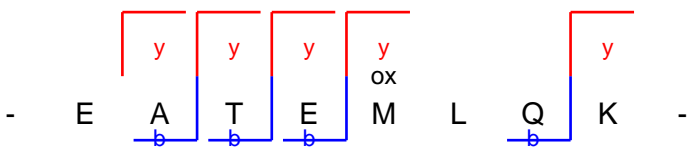

| Raw File                                | Scan  | Method    | Score | m/z    |
|-----------------------------------------|-------|-----------|-------|--------|
| RO-QC-160121_ZackD_SS_Set_02_Fraction_4 | 21188 | FTMS; HCD | 66.69 | 824.48 |

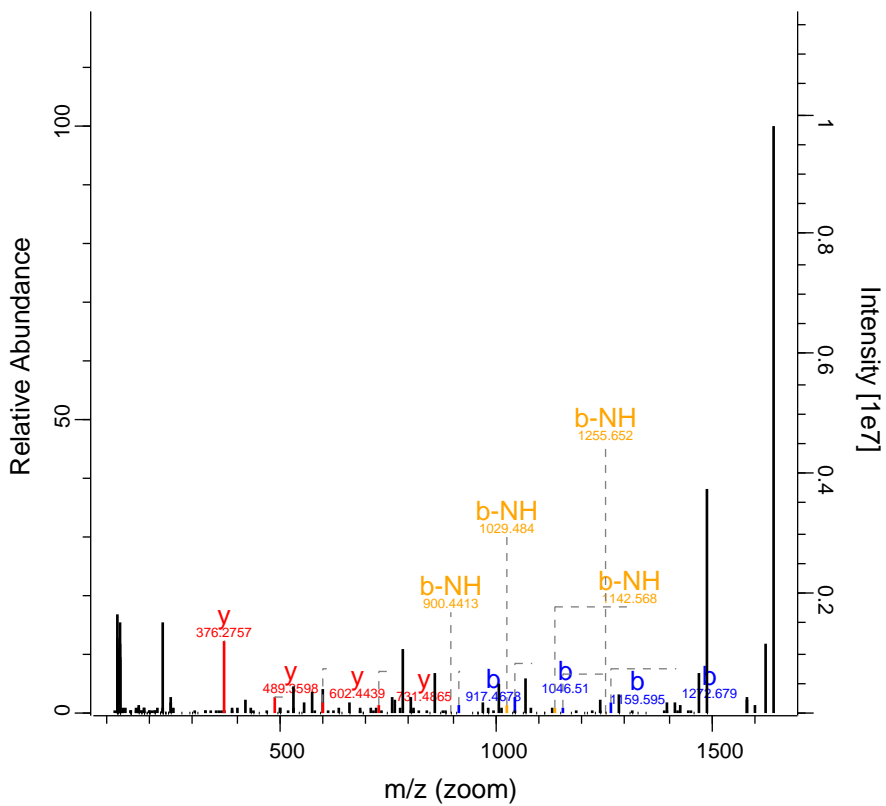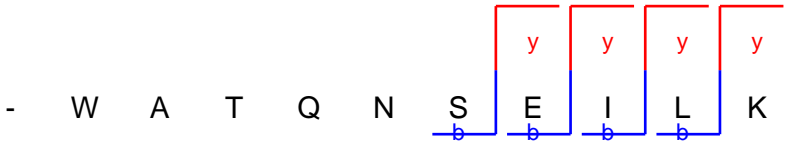

| Raw File                                | Scan  | Method    | Score | m/z    |
|-----------------------------------------|-------|-----------|-------|--------|
| RO-QC-160121_ZackD_SS_Set_02_Fraction_4 | 21280 | FTMS; HCD | 76.23 | 549.99 |

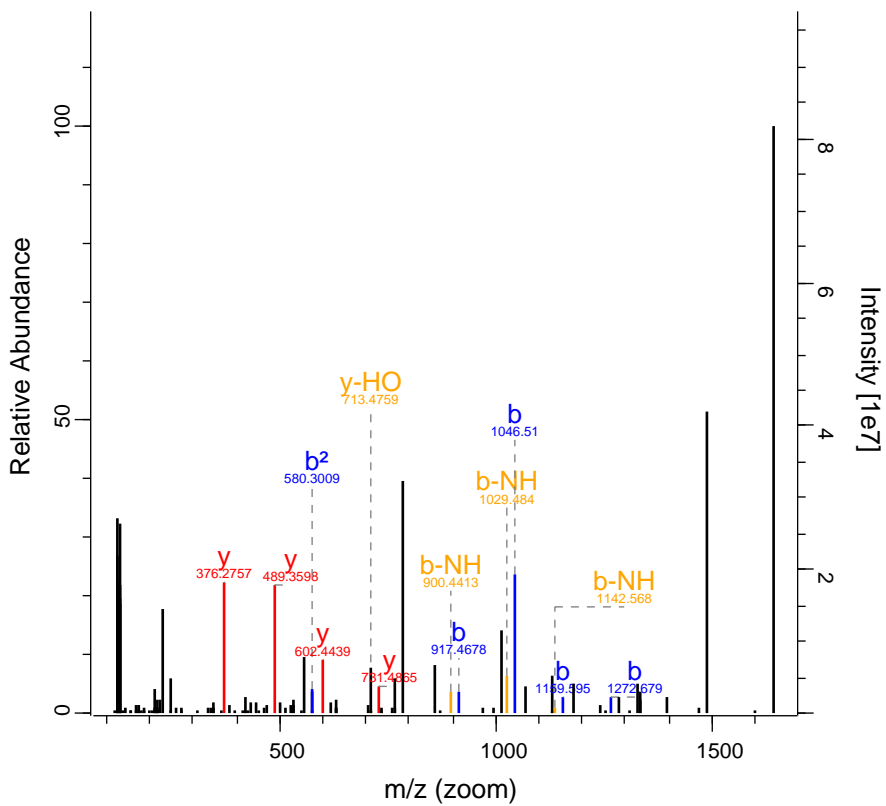

RO-QC-160121\_ZackD\_SS\_Set\_02\_Fraction 21589 FTMS; HC 41.05 562.56 CYP17A1

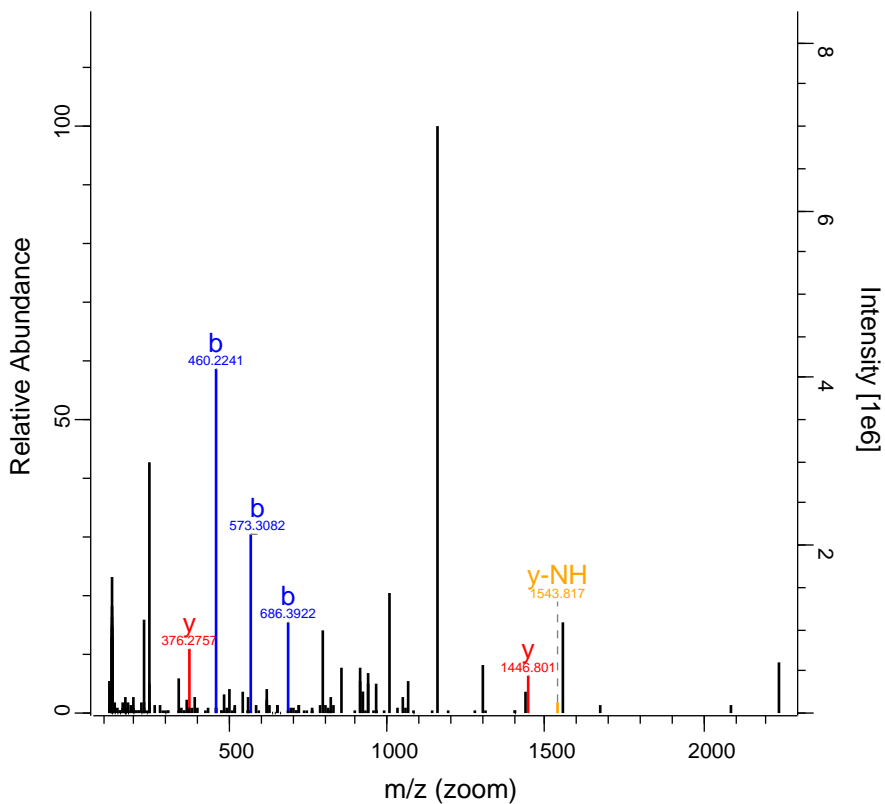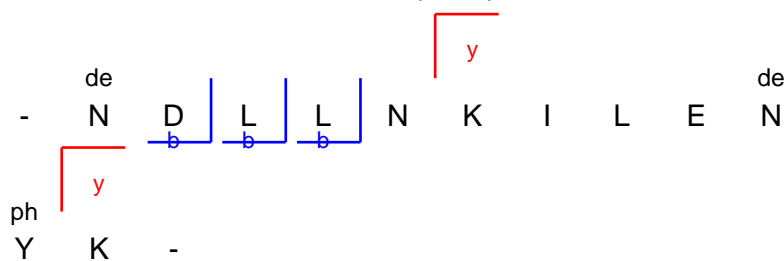





RO-QC-160121\_ZackD\_SS\_Set\_02\_Fraction 22683 FTMS; HC 60.48 473.62 CD14

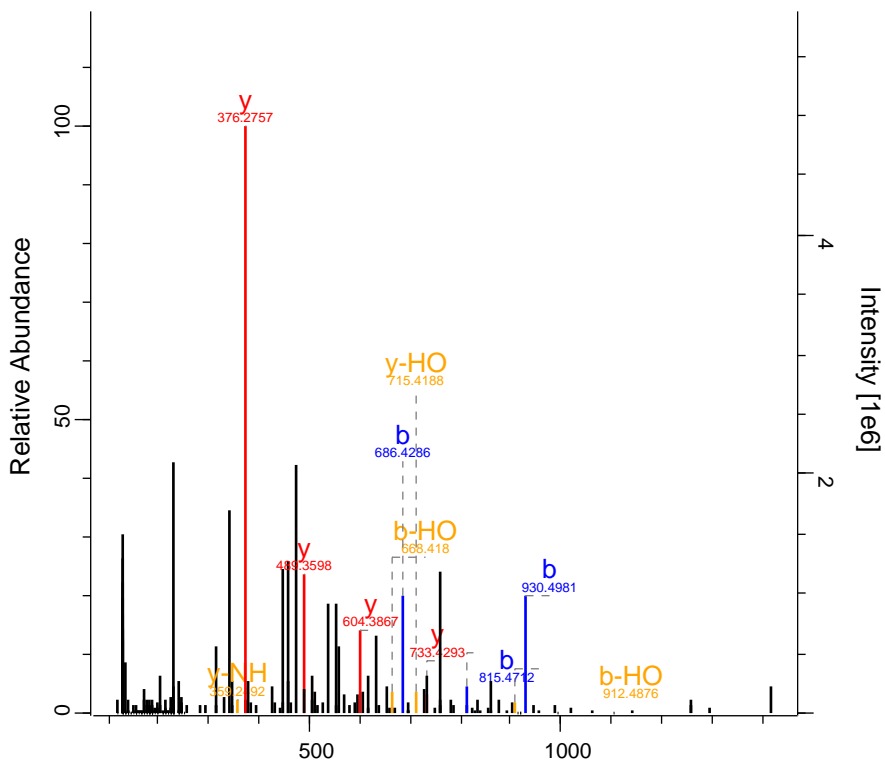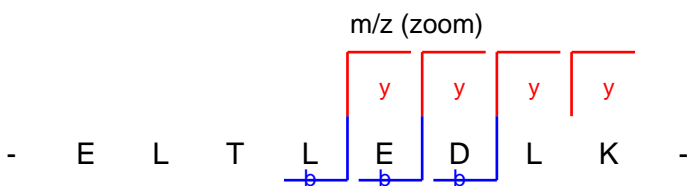

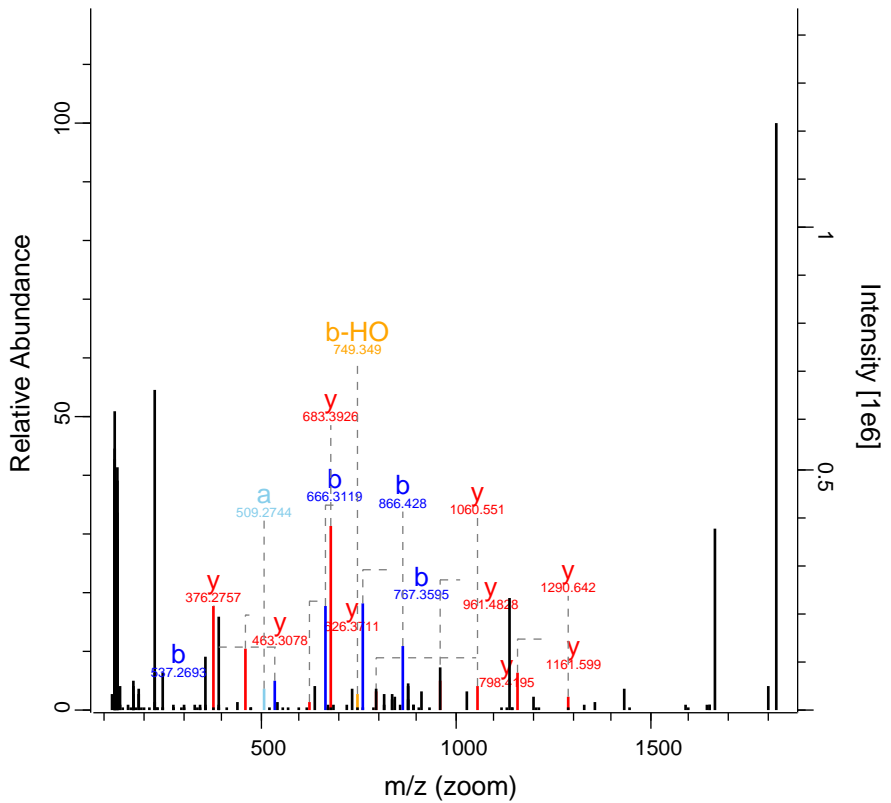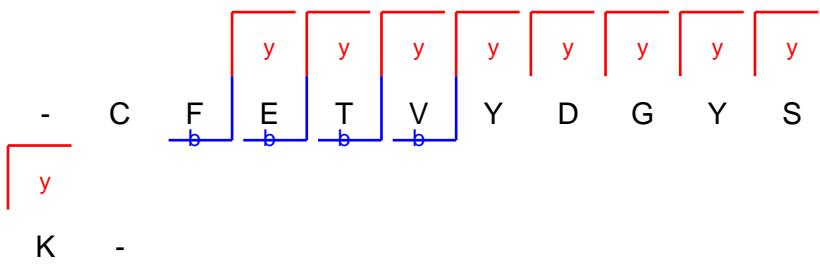

RO-QC-160121\_ZackD\_SS\_Set\_02\_Fraction 23886 FTMS; HCl 117.07 799.1 FAM103A1

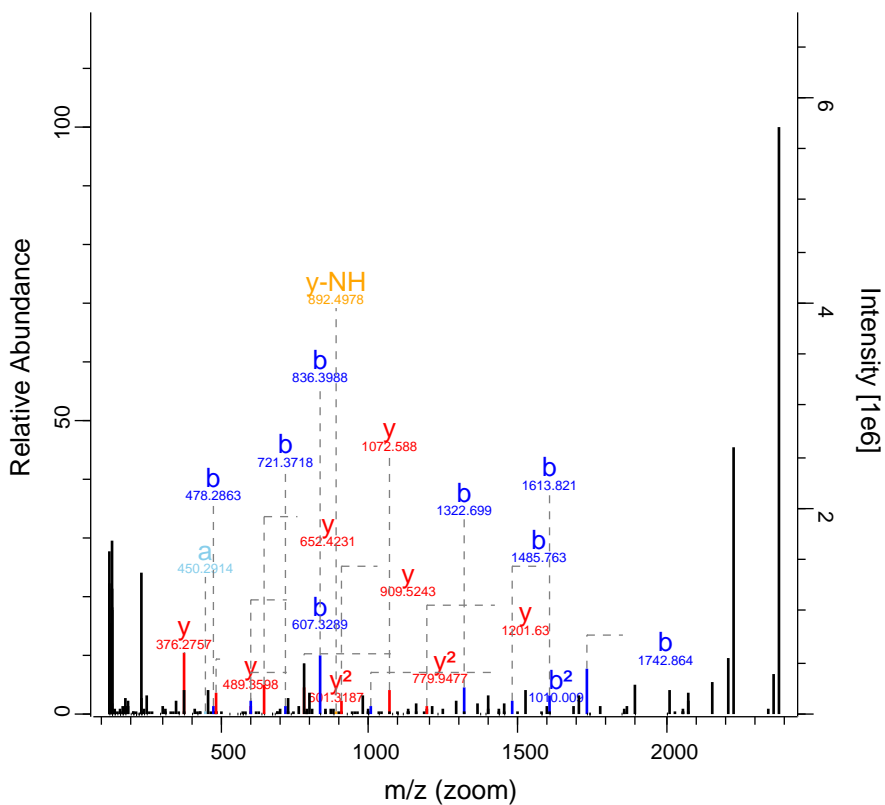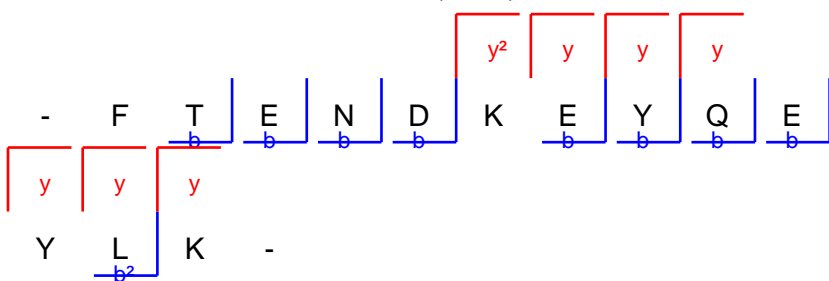

RO-QC-160121\_ZackD\_SS\_Set\_02\_Fraction 23966 FTMS; HC 85.54 599.58 FAM103A1

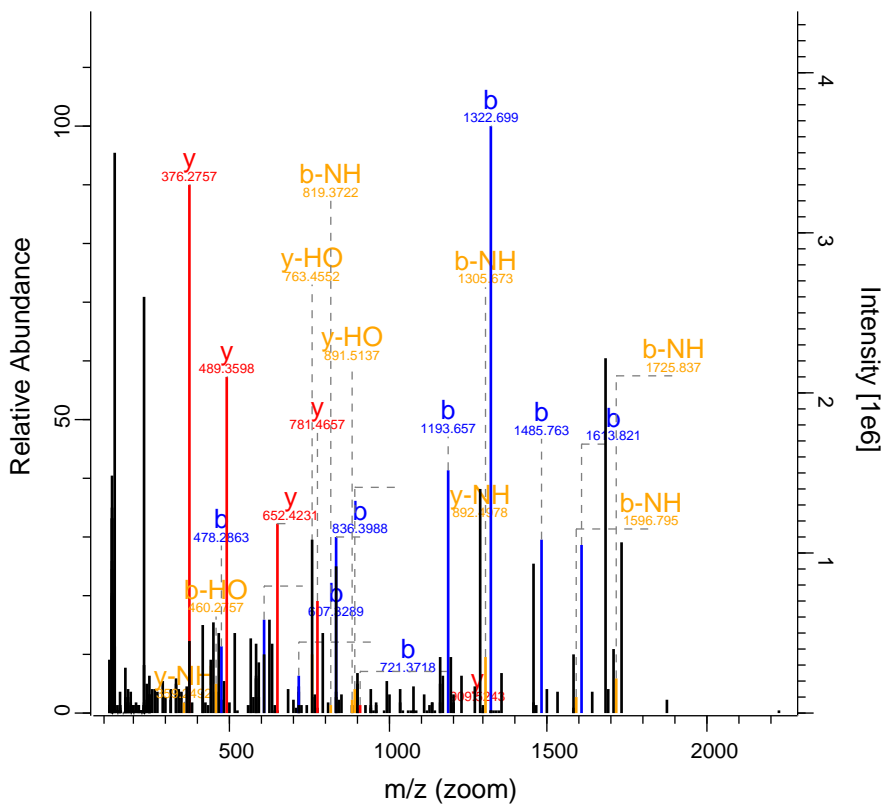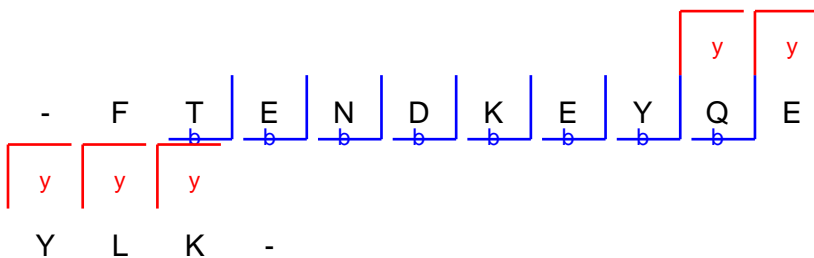

RO-QC-160121\_ZackD\_SS\_Set\_02\_Fractic 23969 FTMS; HC 161.1 1198.15 FAM103A1

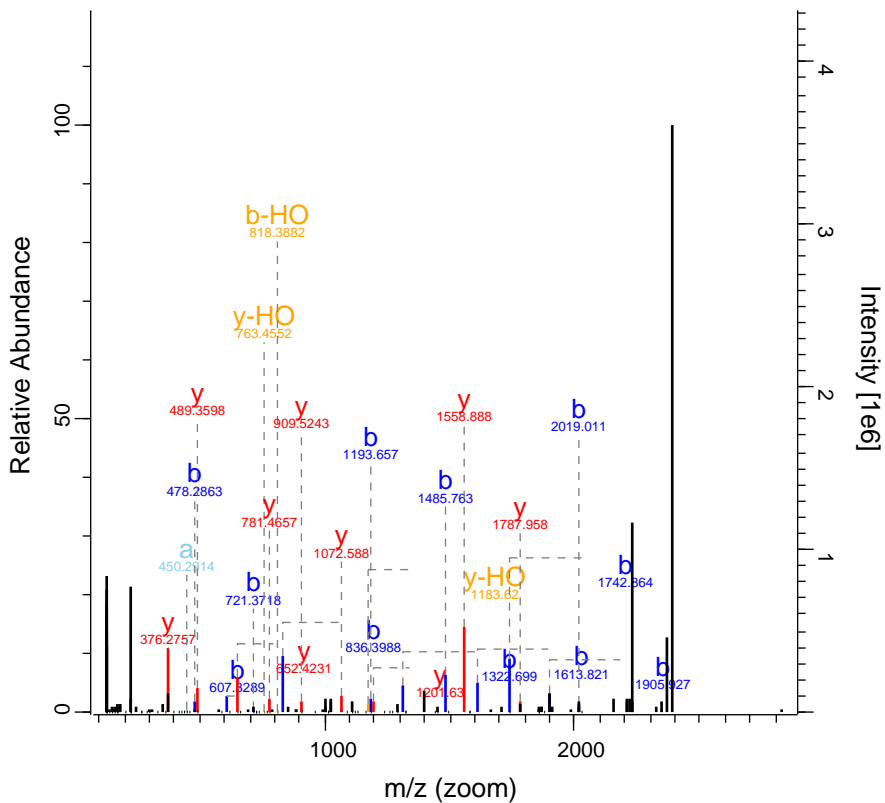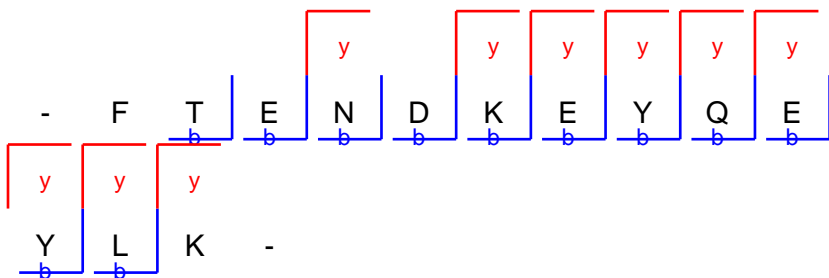

RO-QC-160121\_ZackD\_SS\_Set\_02\_Fractio 24490 FTMS; HC 119.27 710.93 PUS7L

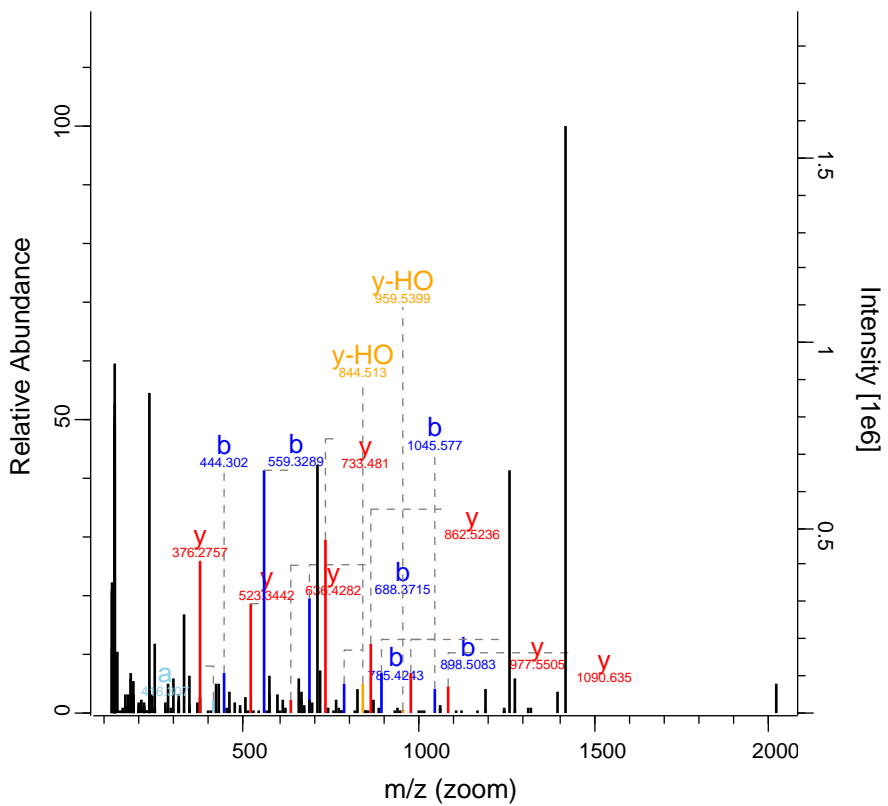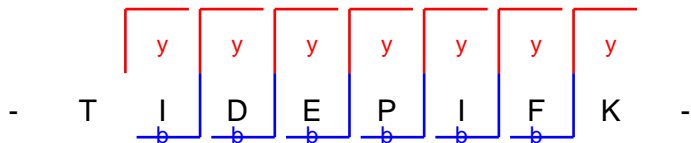



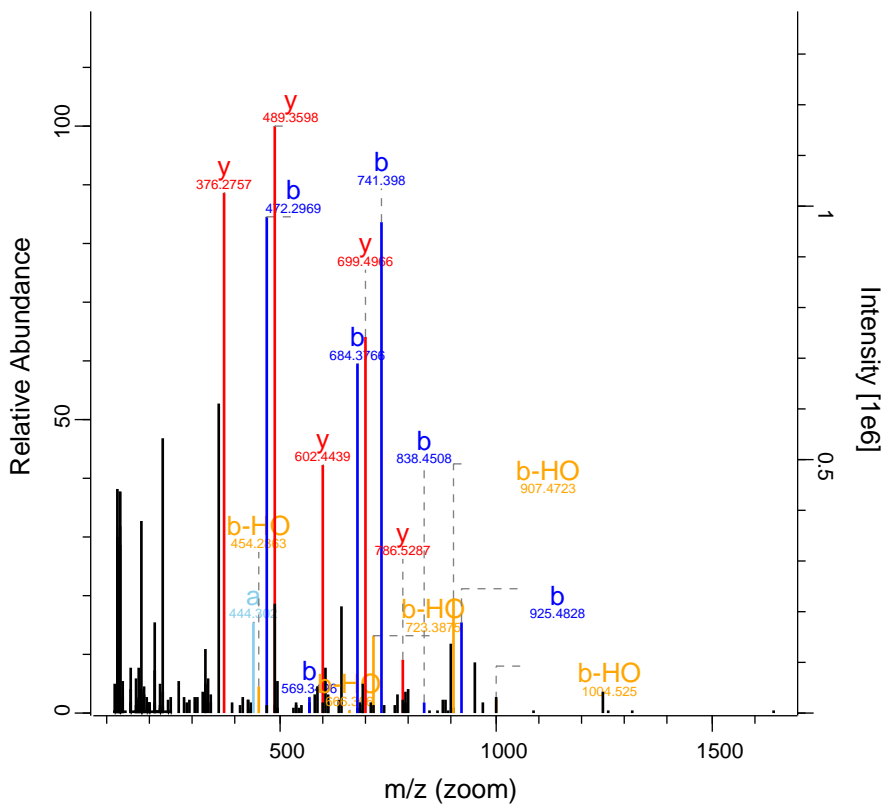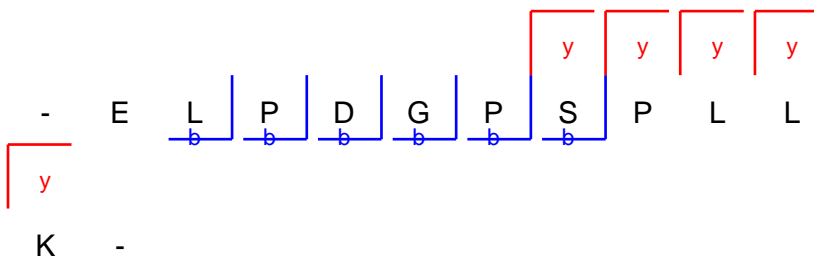



Raw File

Scan Method Score m/z

RO-QC-160121\_ZackD\_SS\_Set\_02\_Fraction\_4

25638 FTMS; HCD 50.11 546.98

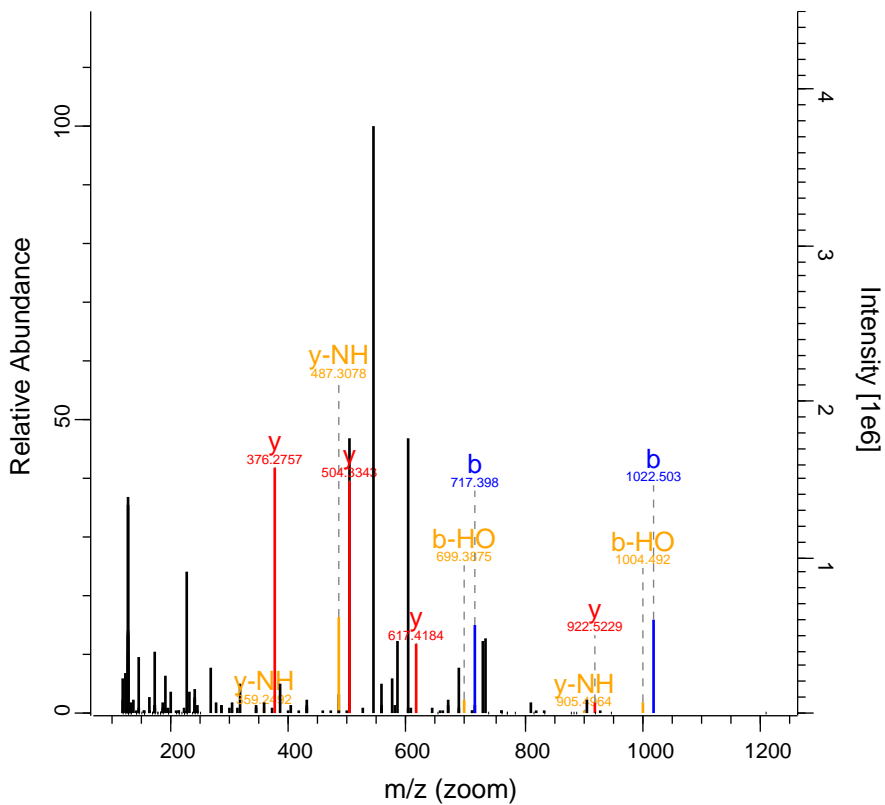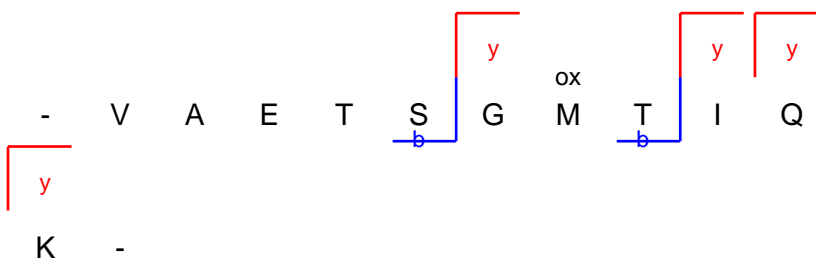

RO-QC-160121\_ZackD\_SS\_Set\_02\_Fraction 26428 FTMS; HC 60.02 666.39 CDNF

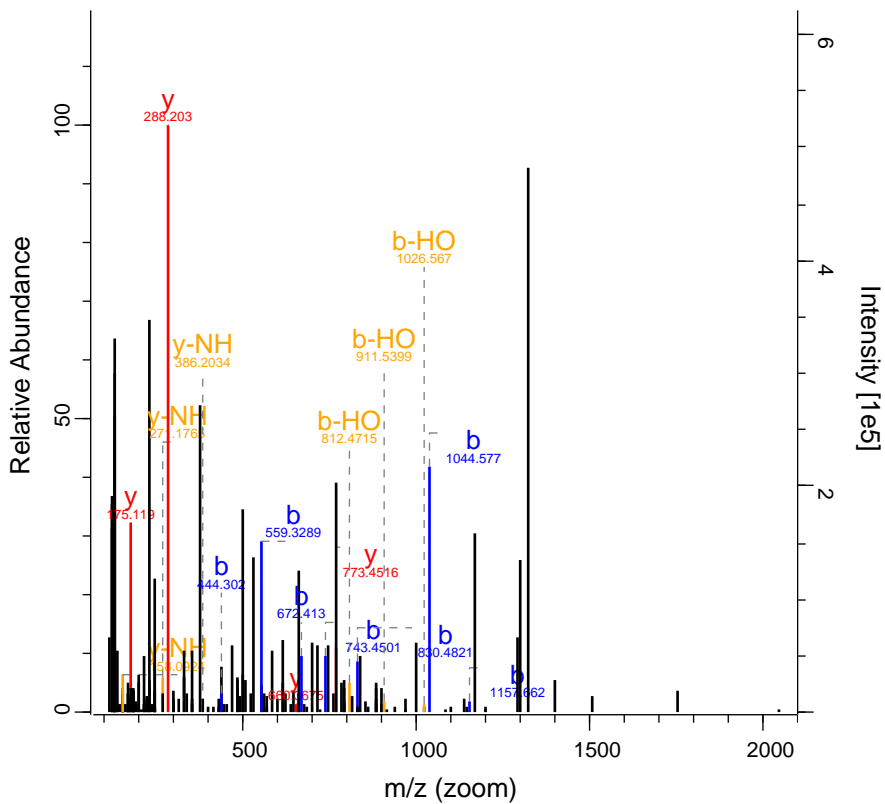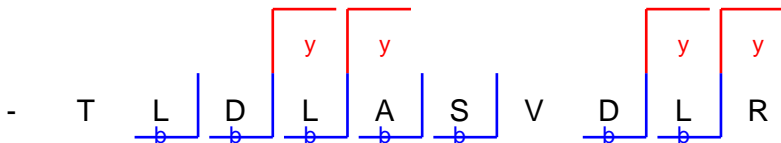

RO-QC-160121\_ZackD\_SS\_Set\_02\_Fractio 27254 FTMS; HC 117.71 888.45 ANKRD39

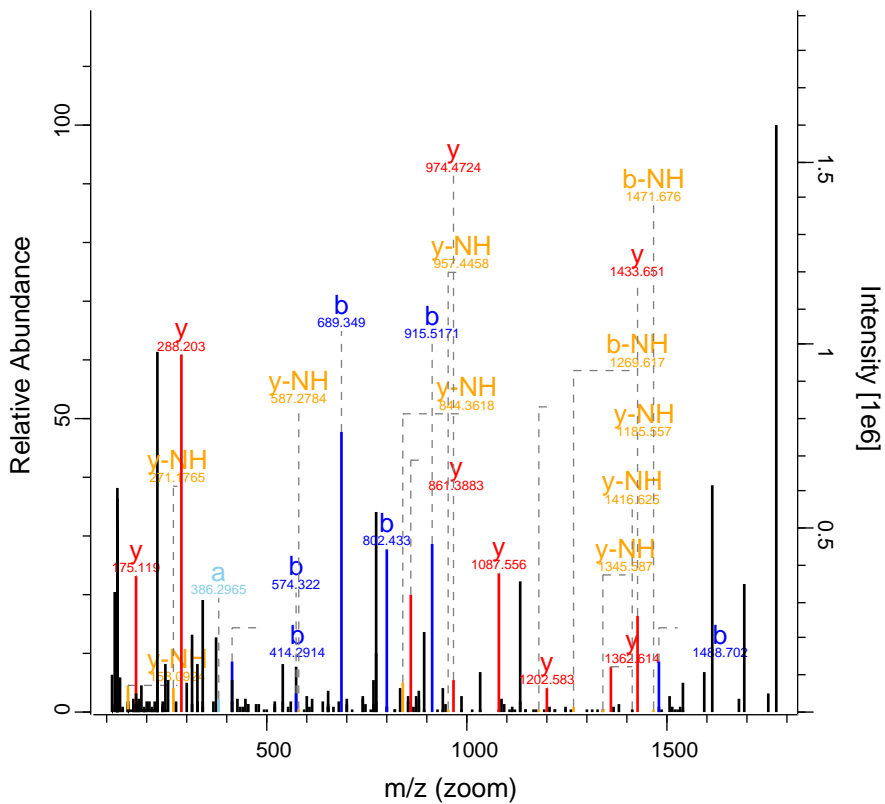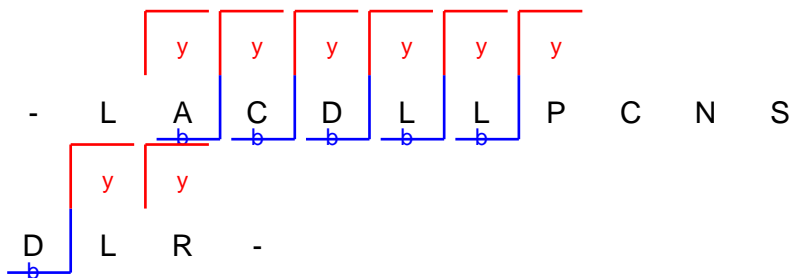

RO-QC-160121\_ZackD\_SS\_Set\_02\_Fractio 28062 FTMS; HC 106.18 770.42 PAXIP1

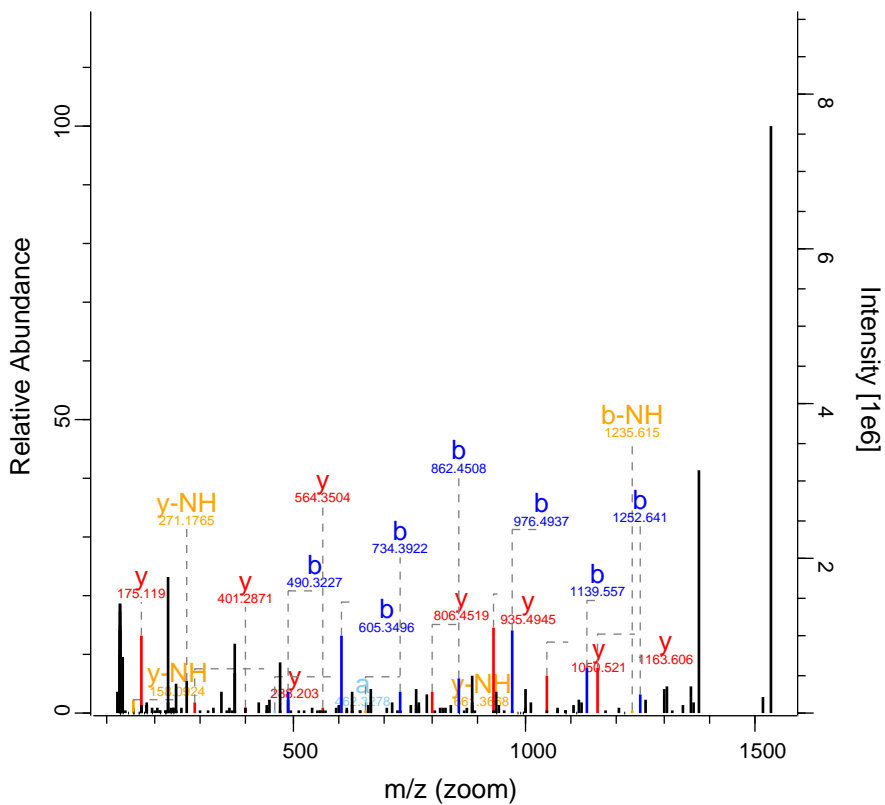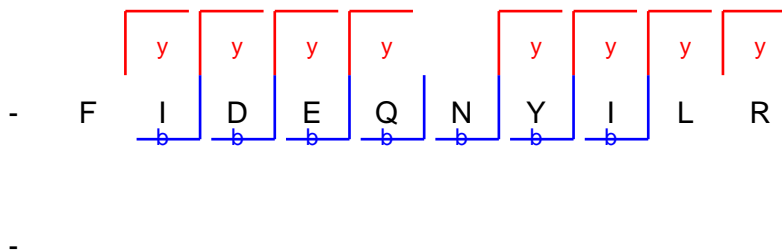

RO-QC-160121\_ZackD\_SS\_Set\_02\_Fractio 28121 FTMS; HC 153.34 841.43 IL17D

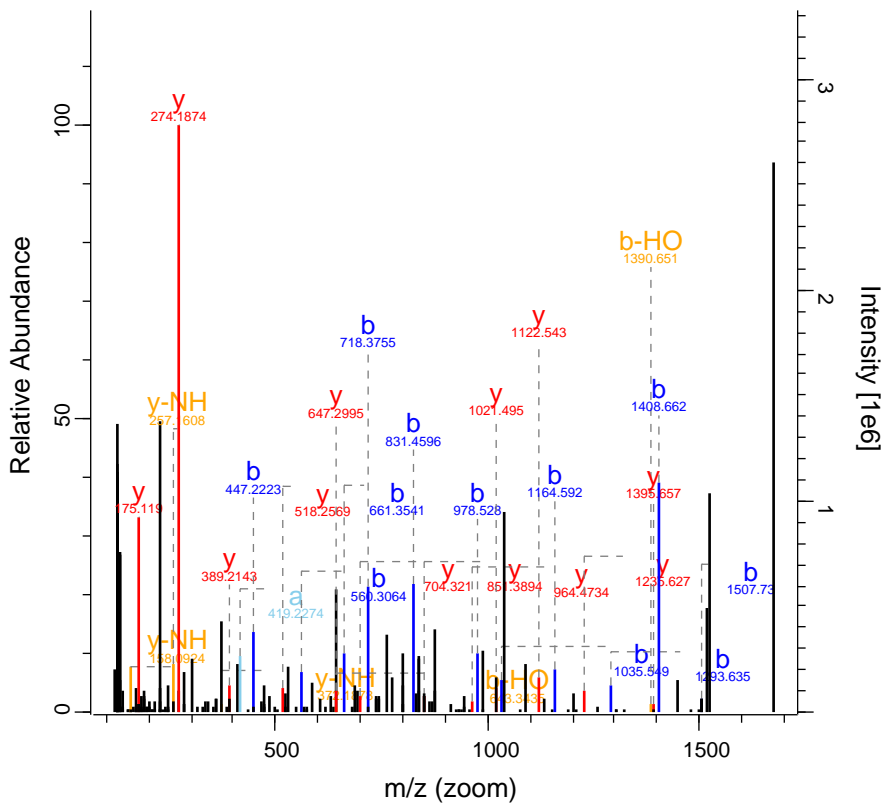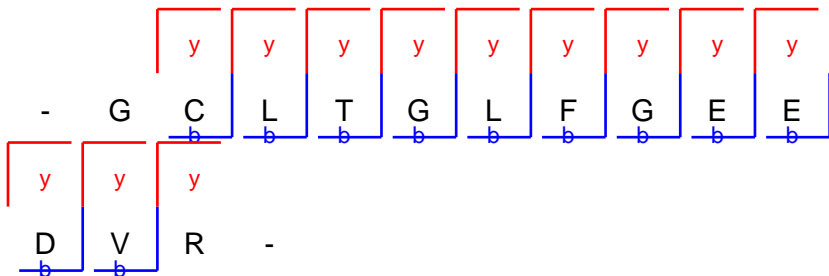

RO-QC-160121\_ZackD\_SS\_Set\_02\_Fraction 28172 FTMS; HC 83.2 561.29 IL17D

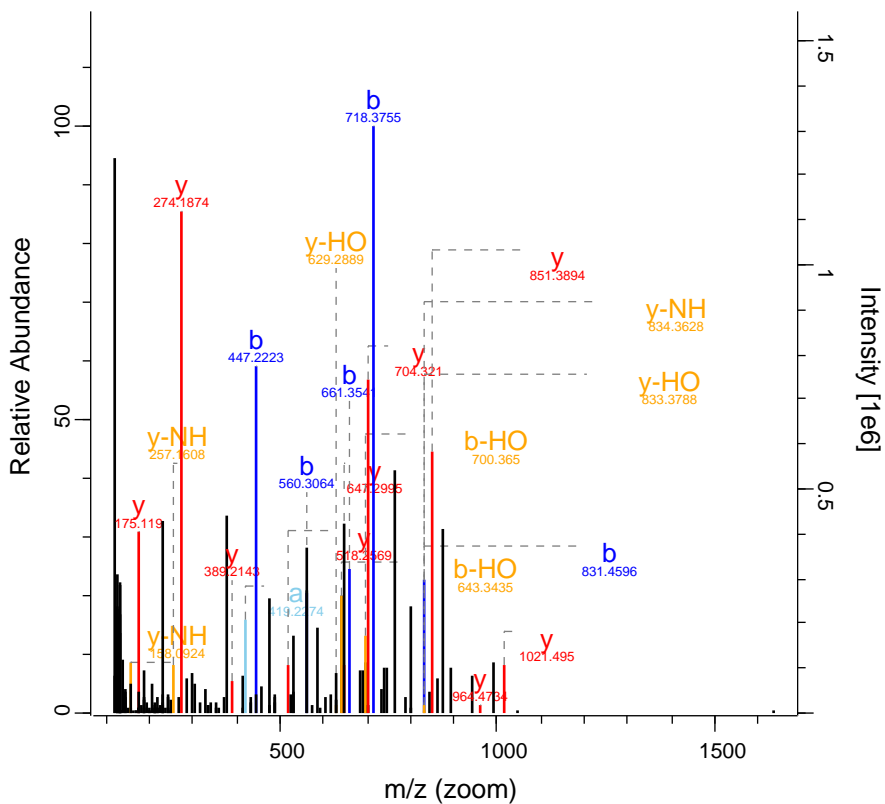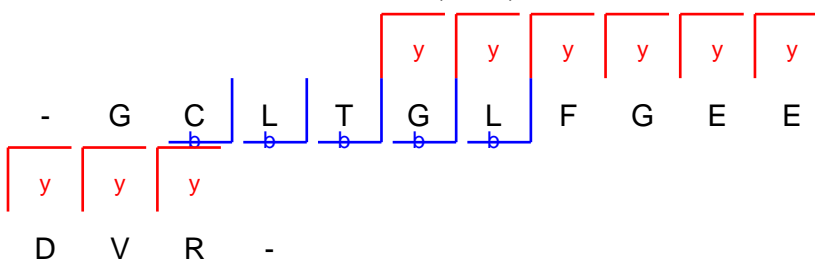

RO-QC-160121\_ZackD\_SS\_Set\_02\_Fraction 28213 FTMS; HC 46.13 737.86 TRIL

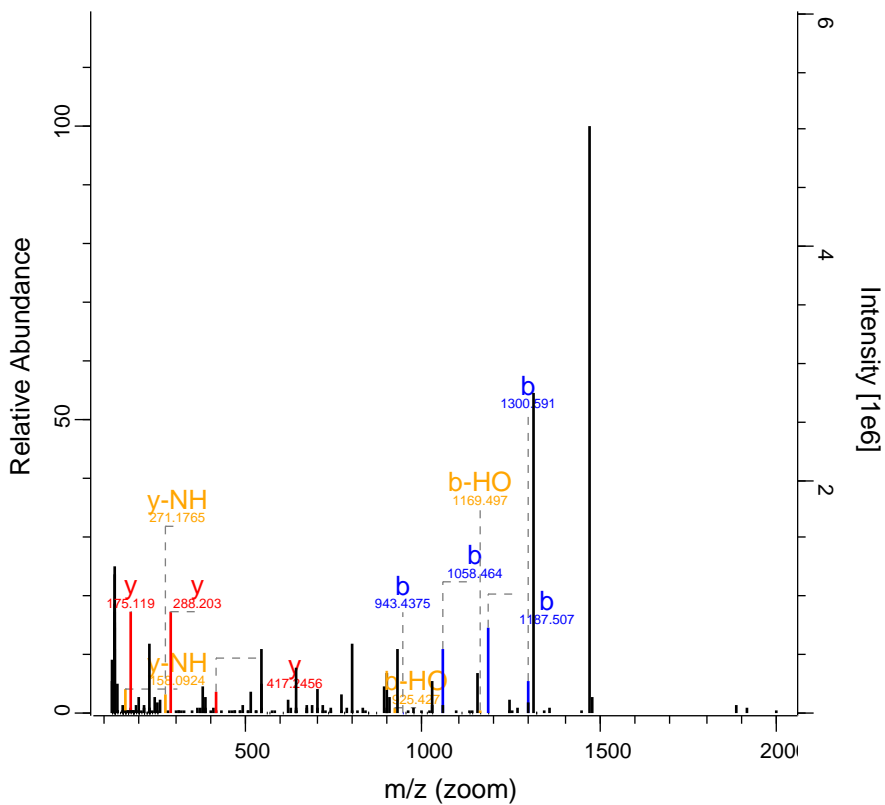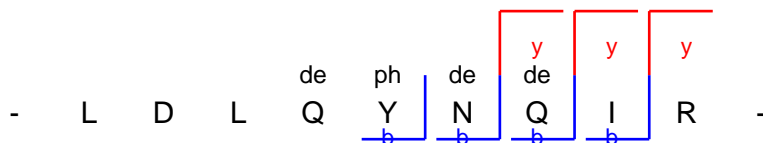

RO-QC-160121\_ZackD\_SS\_Set\_02\_Fraction 28751 FTMS; HC 75.89 800.47 PRTFDC1

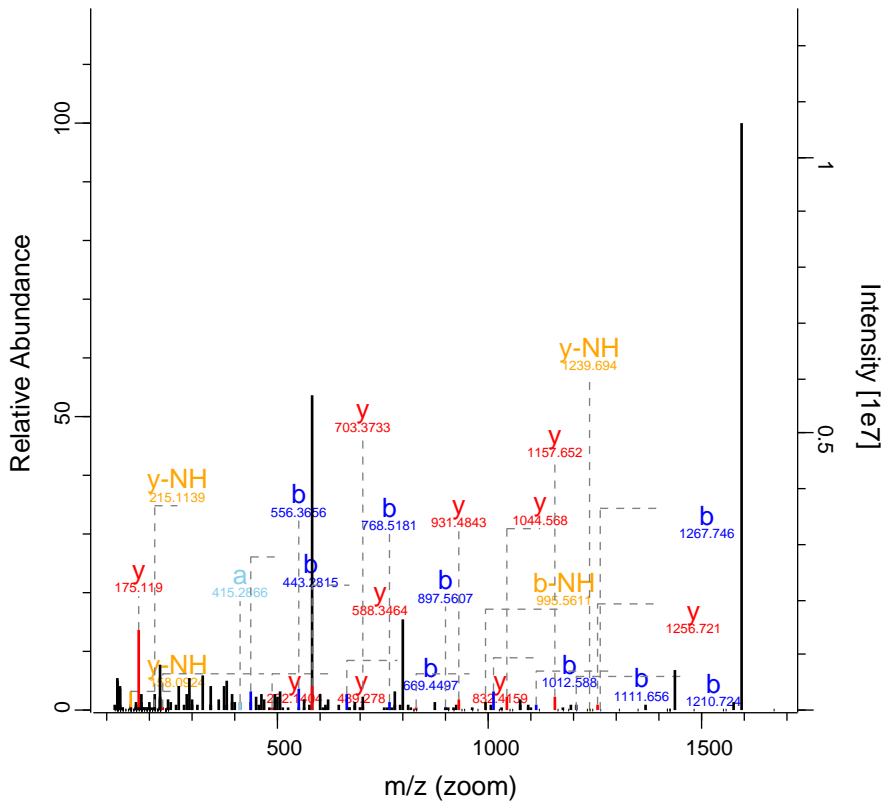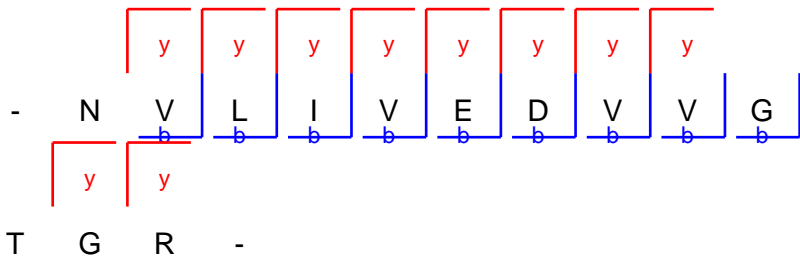



RO-QC-160121\_ZackD\_SS\_Set\_02\_Fraction 28848 FTMS; HC 66.14 845.14 CABLES2

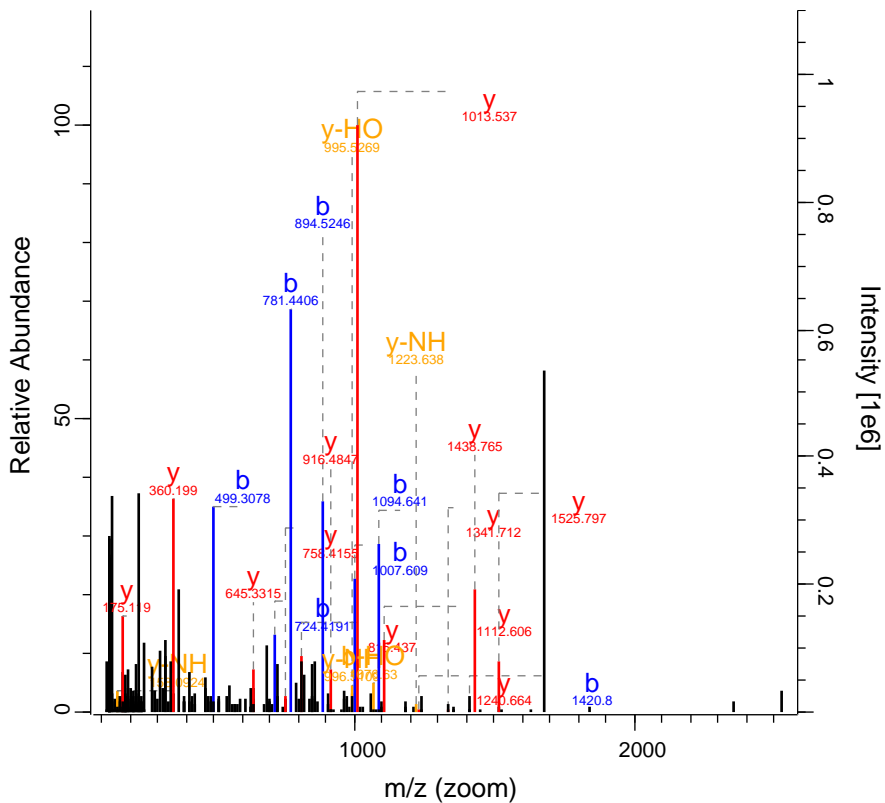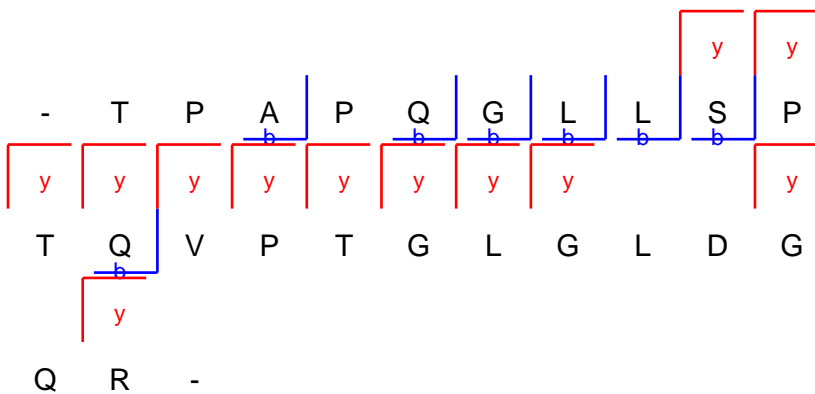

RO-QC-160121\_ZackD\_SS\_Set\_02\_Fraction 28877 FTMS; HC 44.16 815.69 SLITRK4

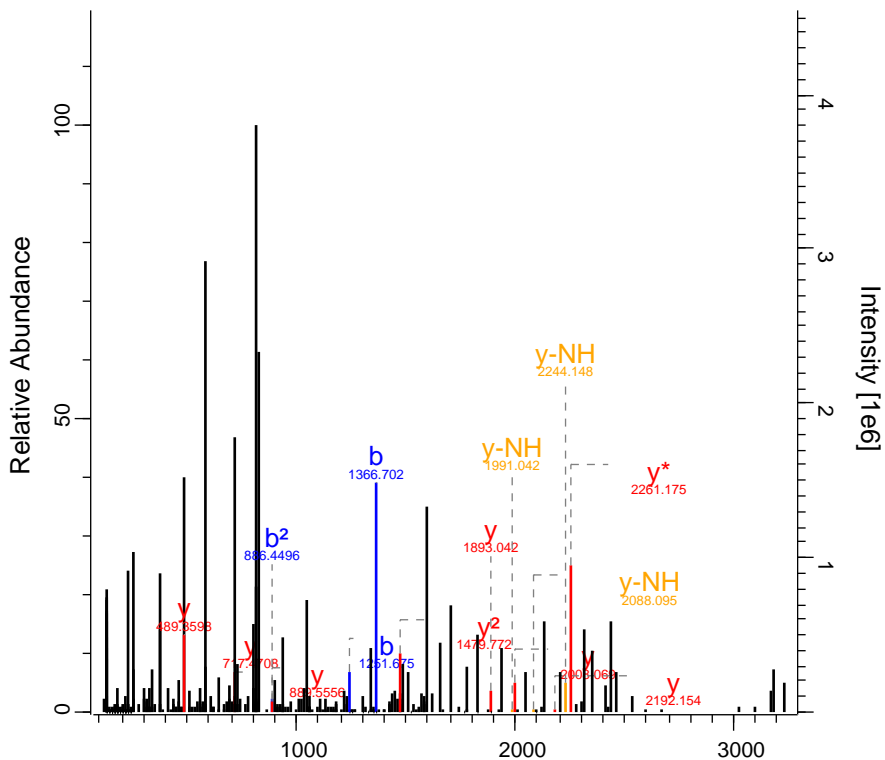

m/z (zoom)

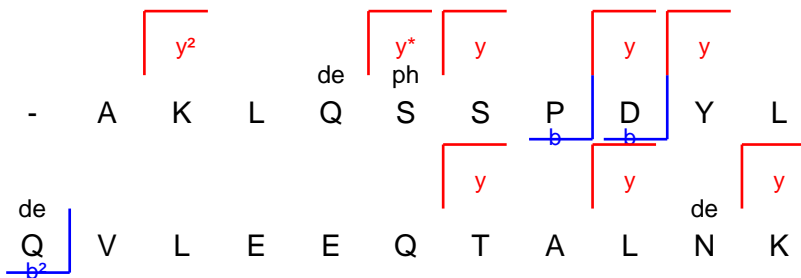

I -

RO-QC-160121\_ZackD\_SS\_Set\_02\_Fraction 30126 FTMS; HC 40.94 750.38 CLEC12A

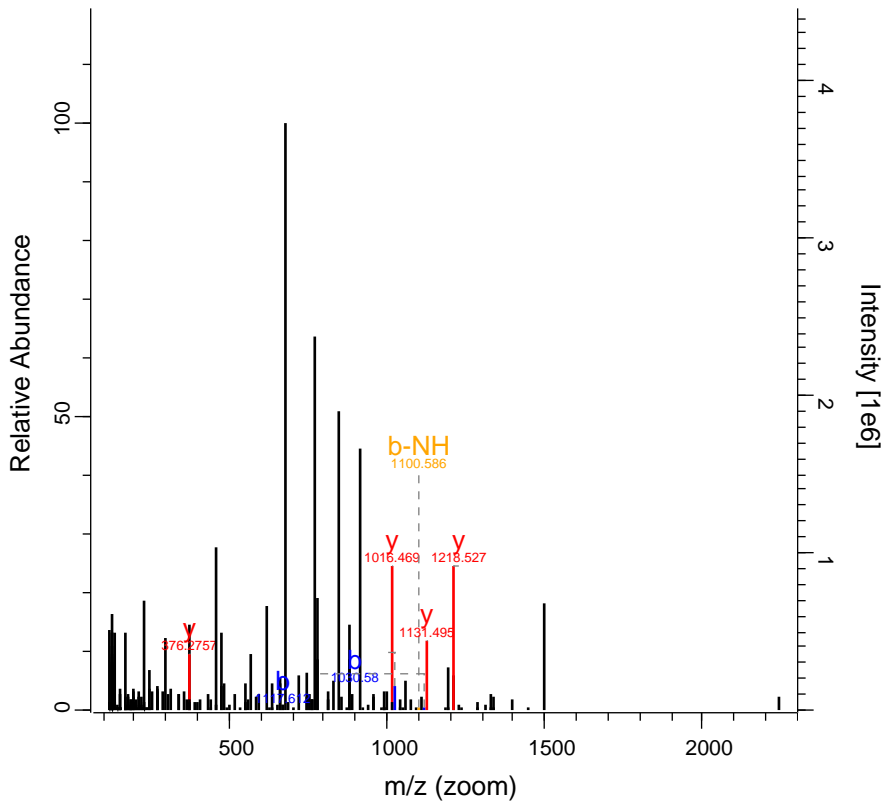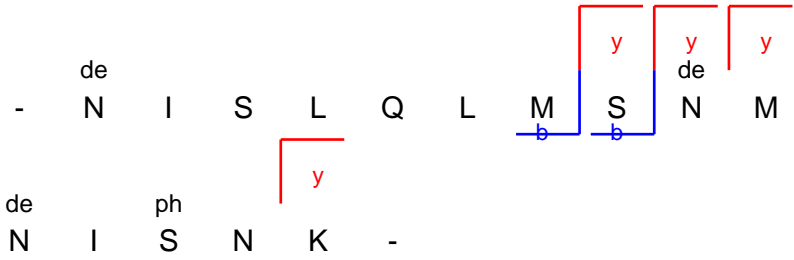

RO-QC-160121\_ZackD\_SS\_Set\_02\_Fractic 30151 FTMS; HC 53.24 1125.06 CLEC12A

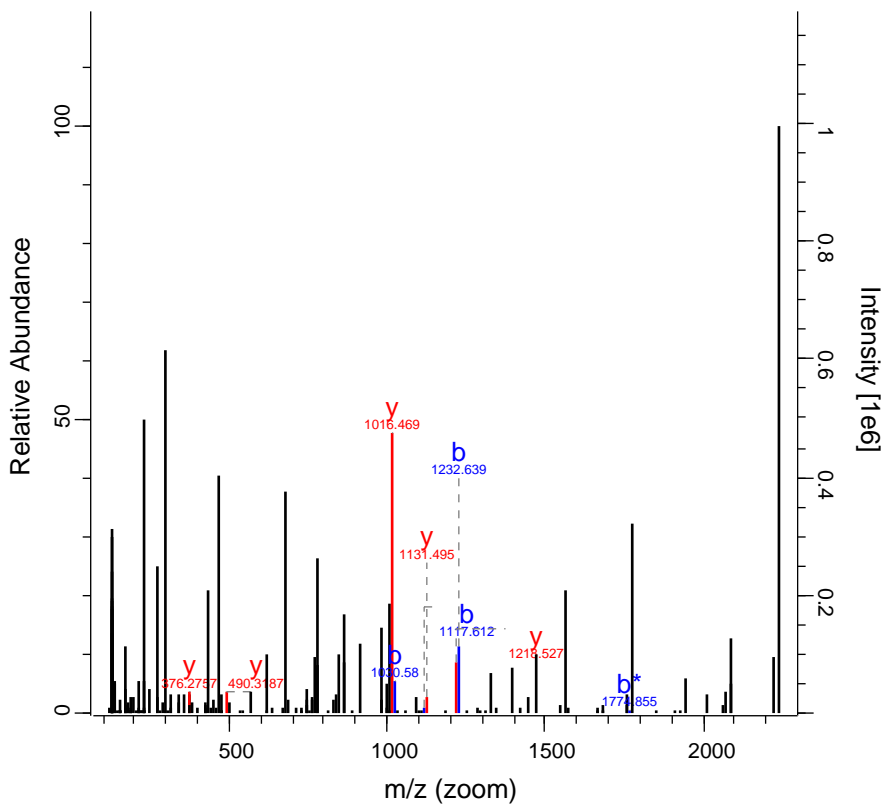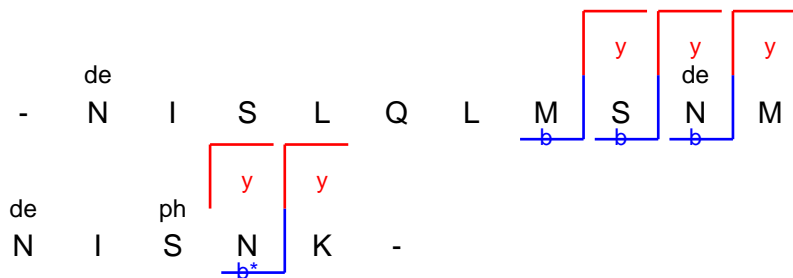

RO-QC-160121\_ZackD\_SS\_Set\_02\_Fraction 30468 FTMS; HC 71.93 565.33 IGFALS

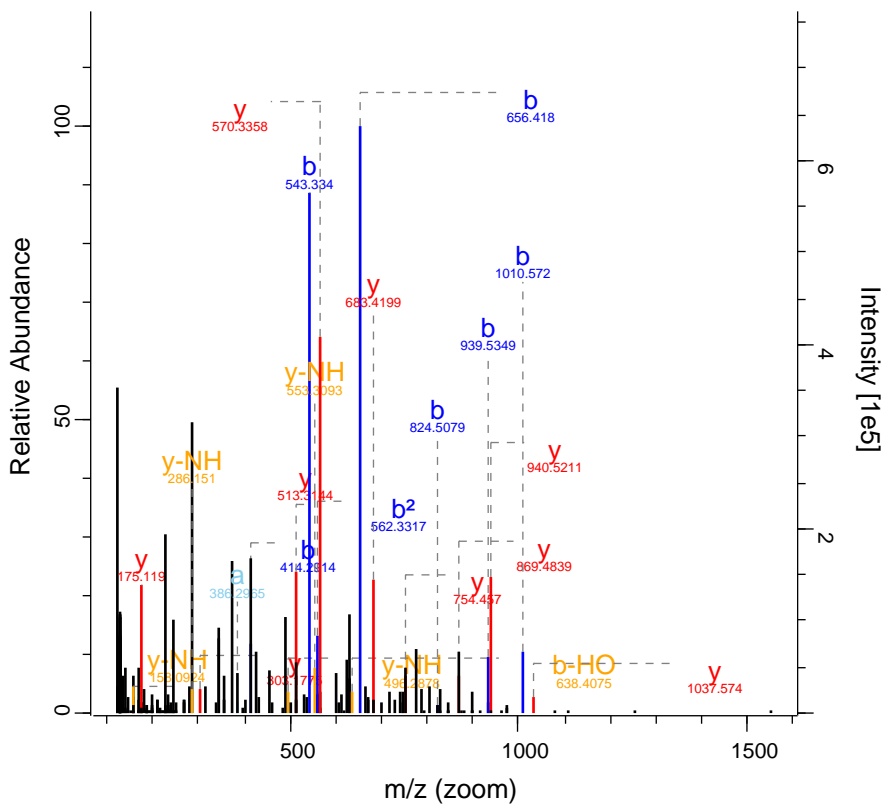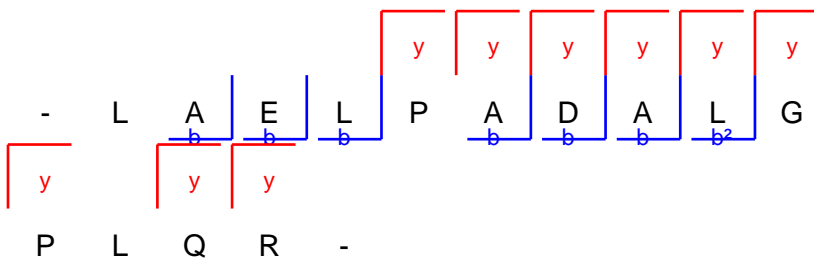

RO-QC-160121\_ZackD\_SS\_Set\_02\_Fraction 30646 FTMS; HC 59.57 601.36 FAM184B

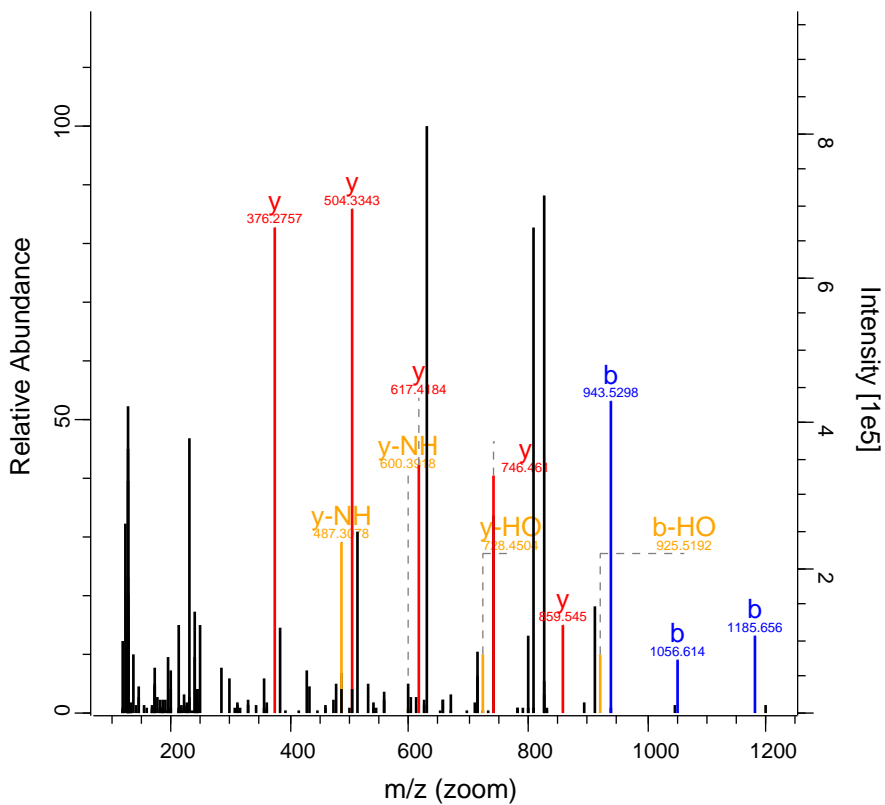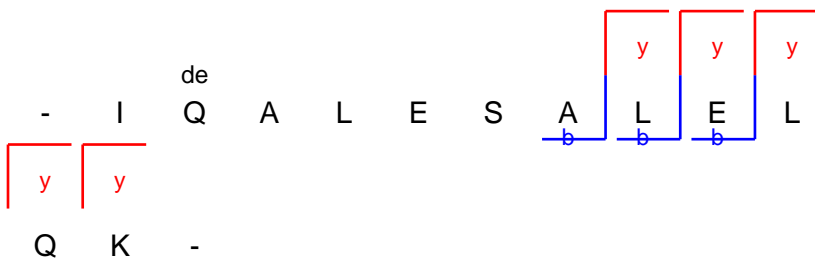

RO-QC-160121\_ZackD\_SS\_Set\_02\_Fratio 30726 FTMS; HC 203.64 687.38 TMUB2

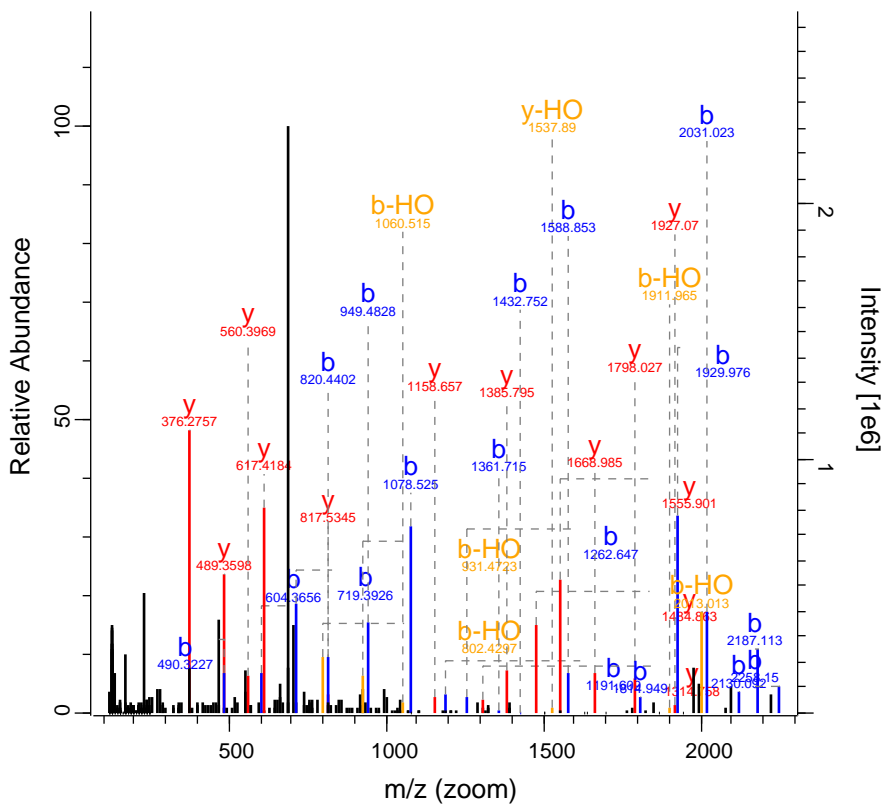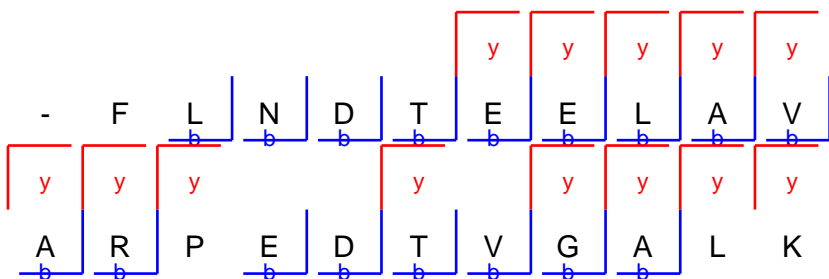





RO-QC-160121\_ZackD\_SS\_Set\_02\_Fraction 31199 FTMS; HC 46.32 669.33 ABRACL

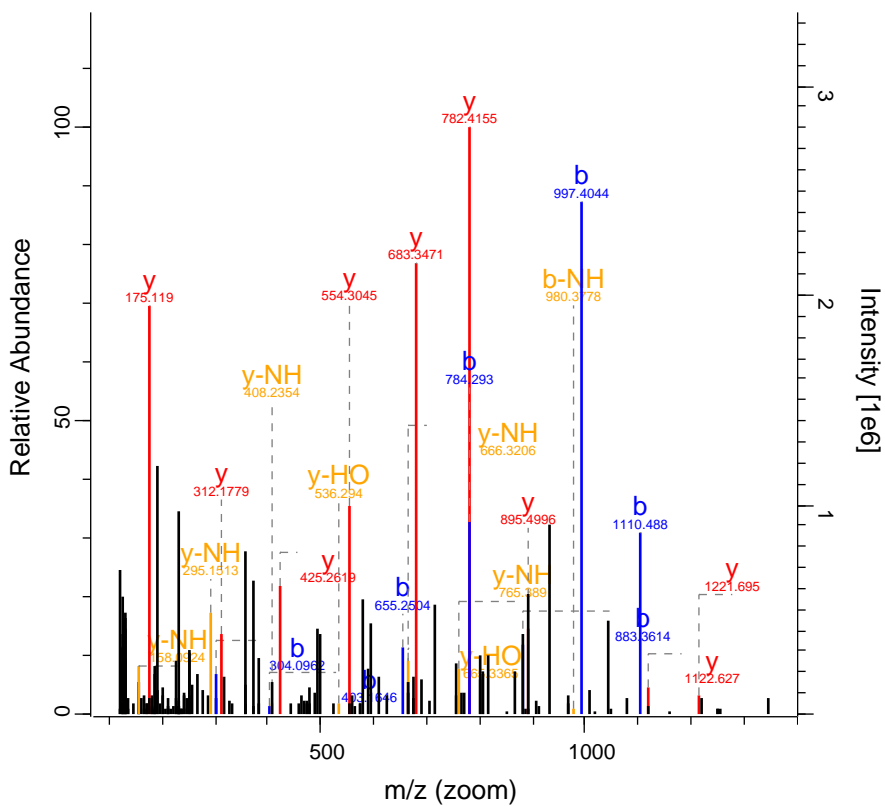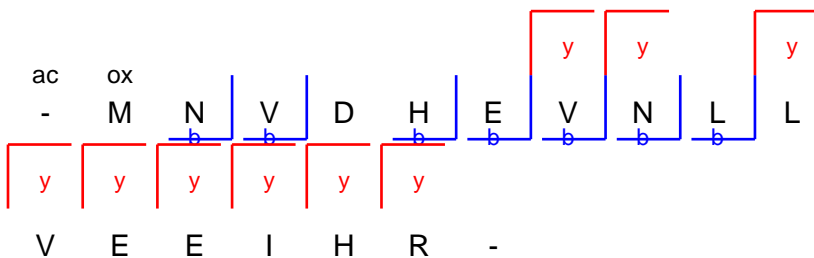





RO-QC-160121\_ZackD\_SS\_Set\_02\_Fraction 33631 FTMS; HCl 84.25 737.4 MON1A

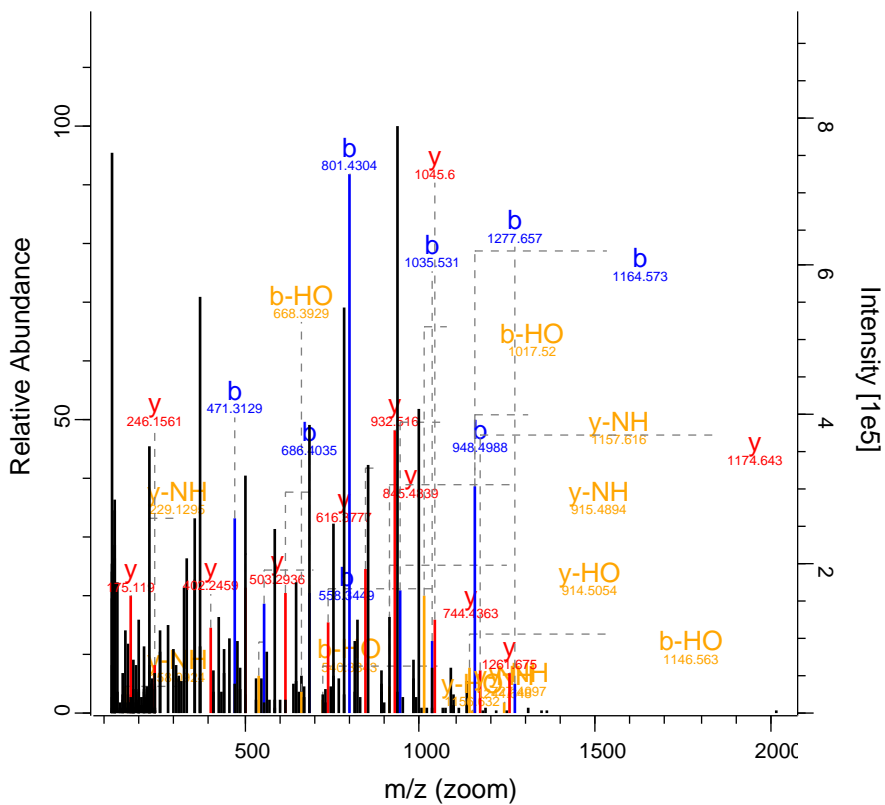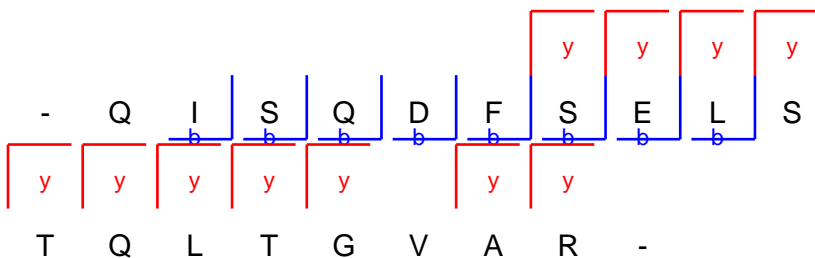

RO-QC-160121\_ZackD\_SS\_Set\_02\_Fraction 33743 FTMS; HC 80.13 801.68 FAM122A

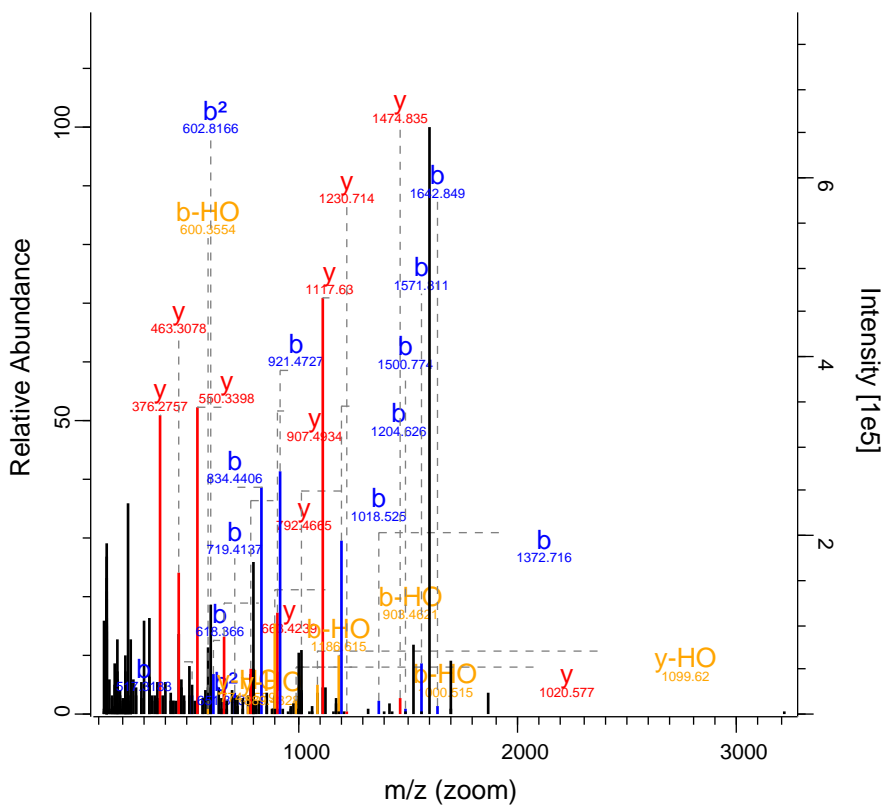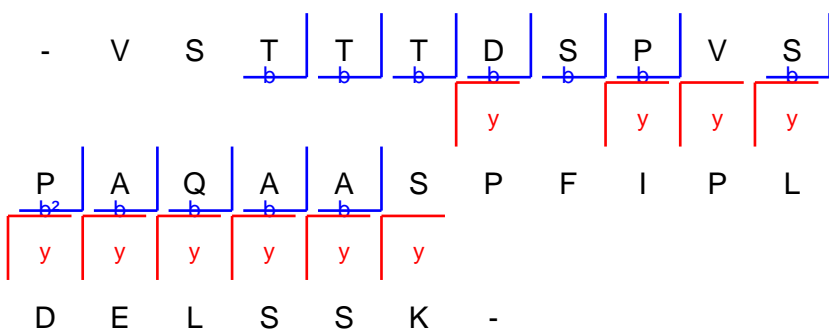

RO-QC-160121\_ZackD\_SS\_Set\_02\_Fraction 33791 FTMS; HC 74.68 620.36 WNT11

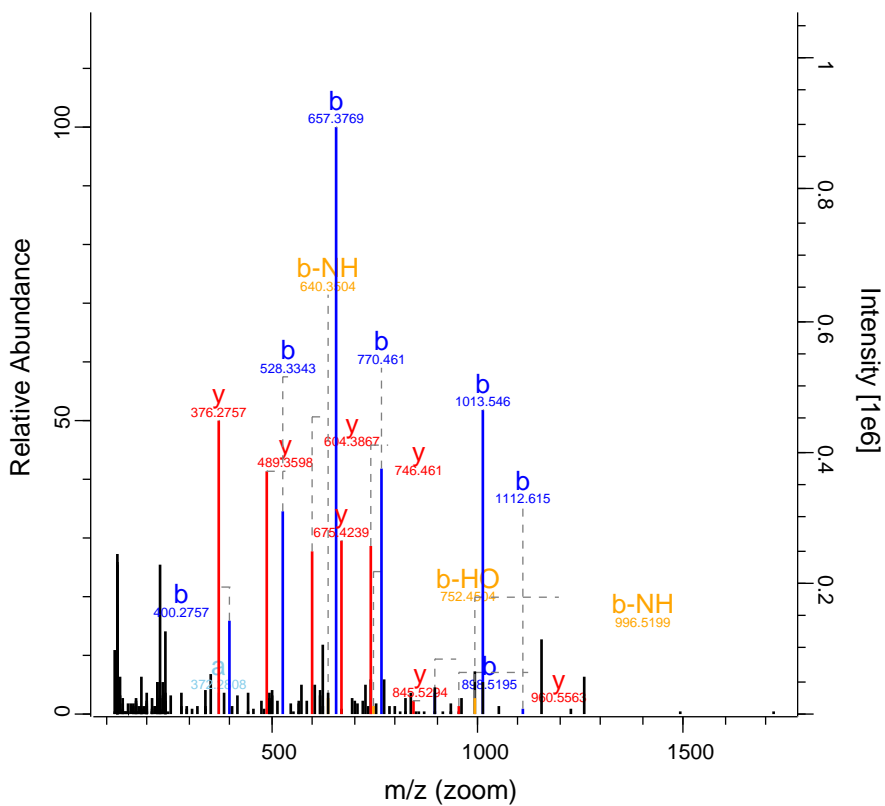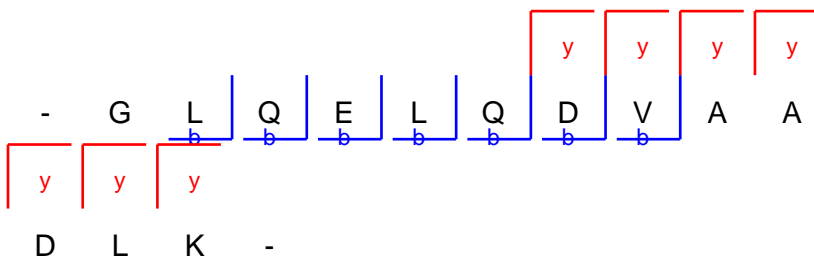

RO-QC-160121\_ZackD\_SS\_Set\_02\_Fractic 33864 FTMS; HC 148.87 1068.57 FAM122A

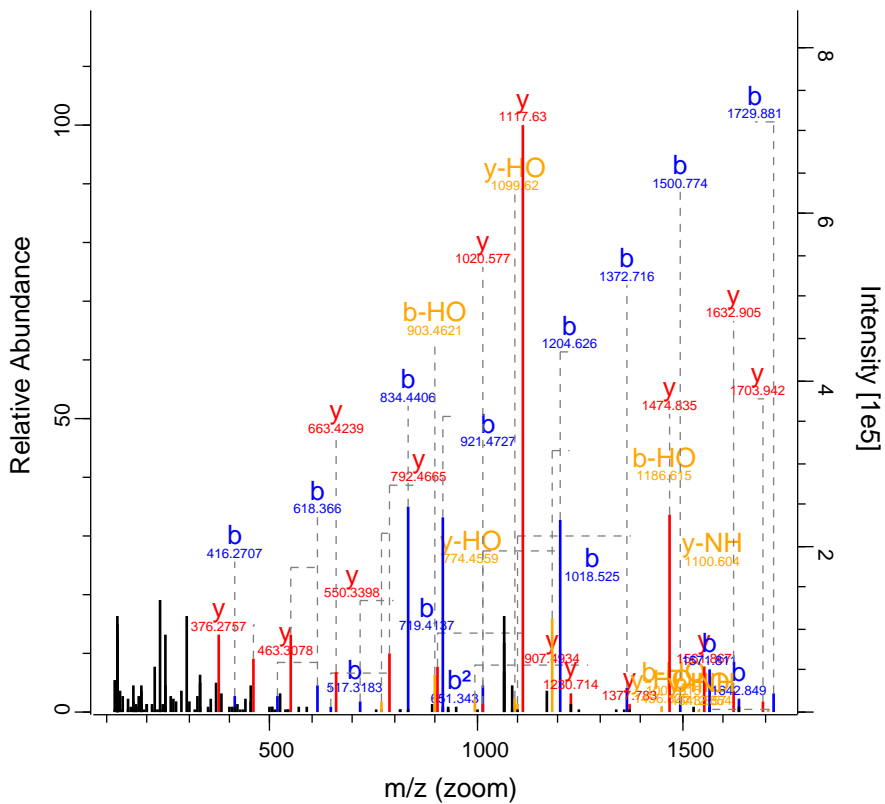

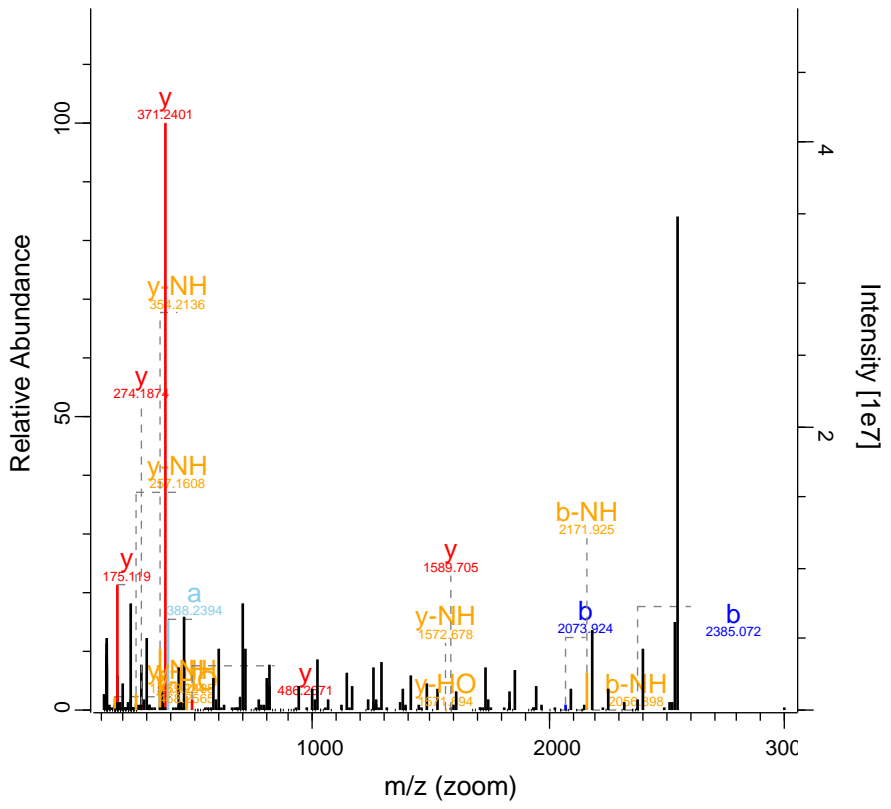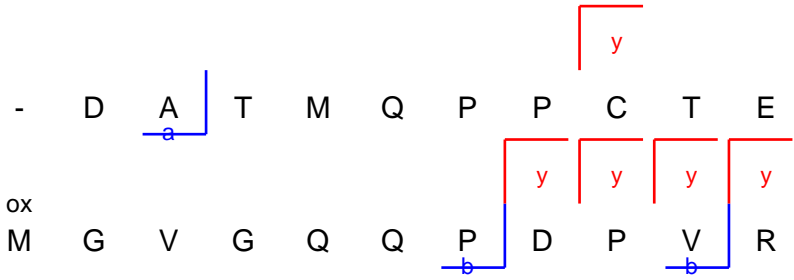



RO-QC-160121\_ZackD\_SS\_Set\_02\_Fractio 34822 FTMS; HC 134.18 996.05 LRIG1

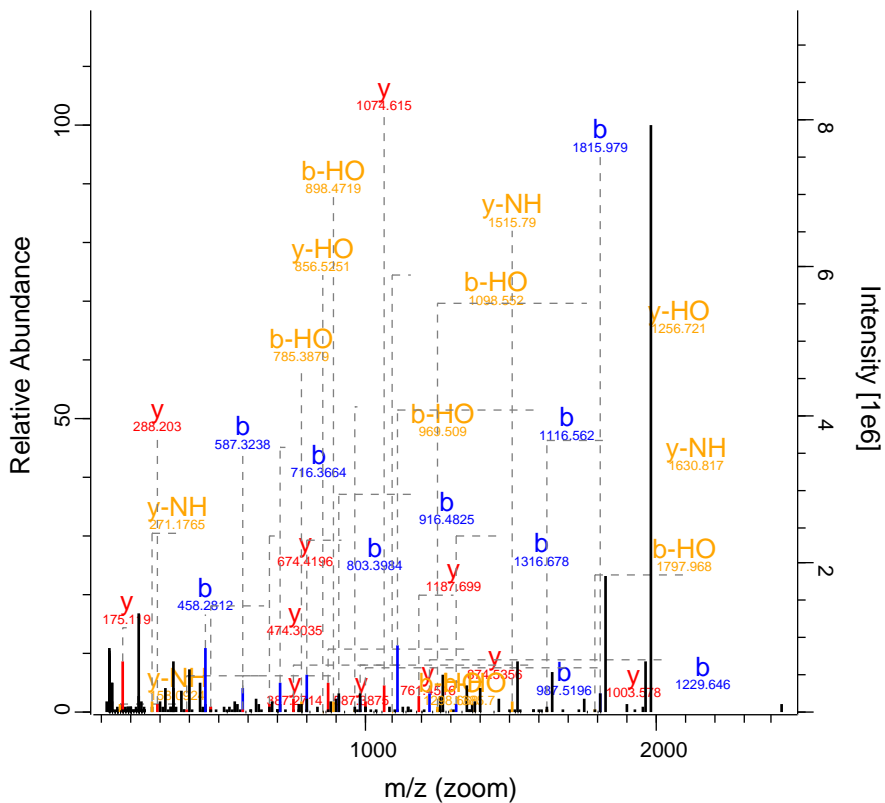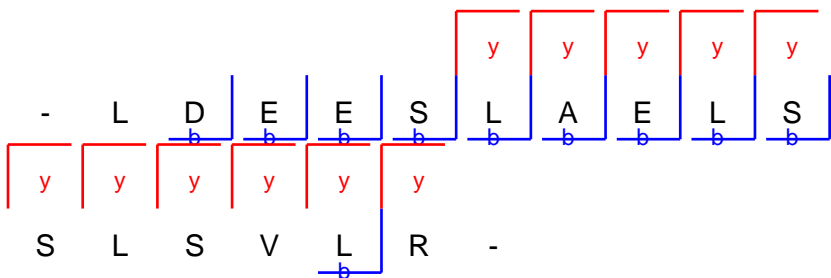

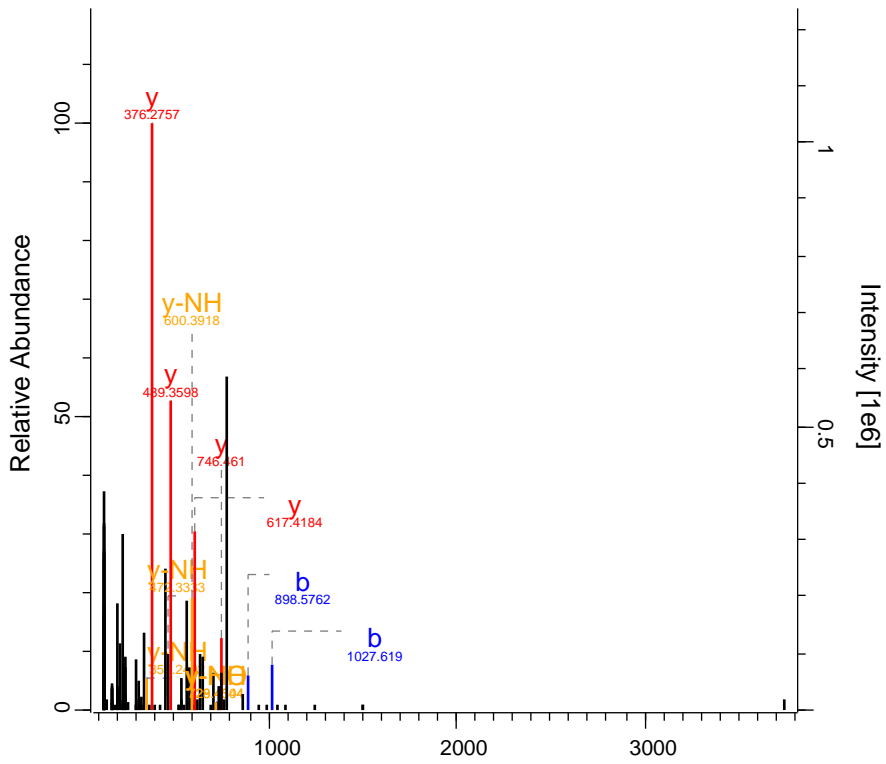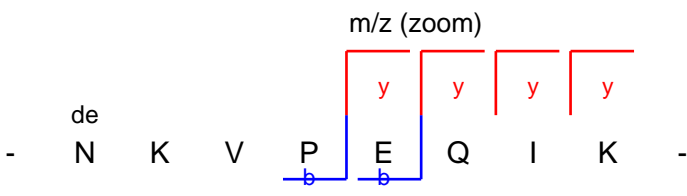

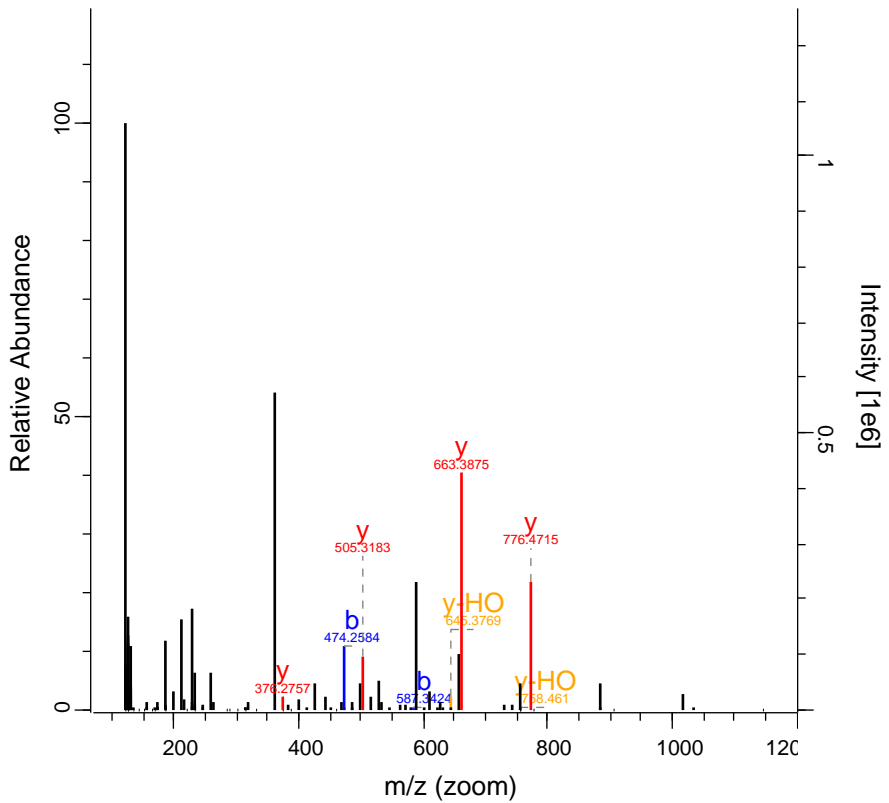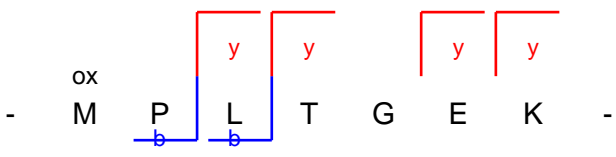

RO-QC-160121\_ZackD\_SS\_Set\_02\_Fraction 5023 FTMS; HCl 92.92 723.39 SLC30A8

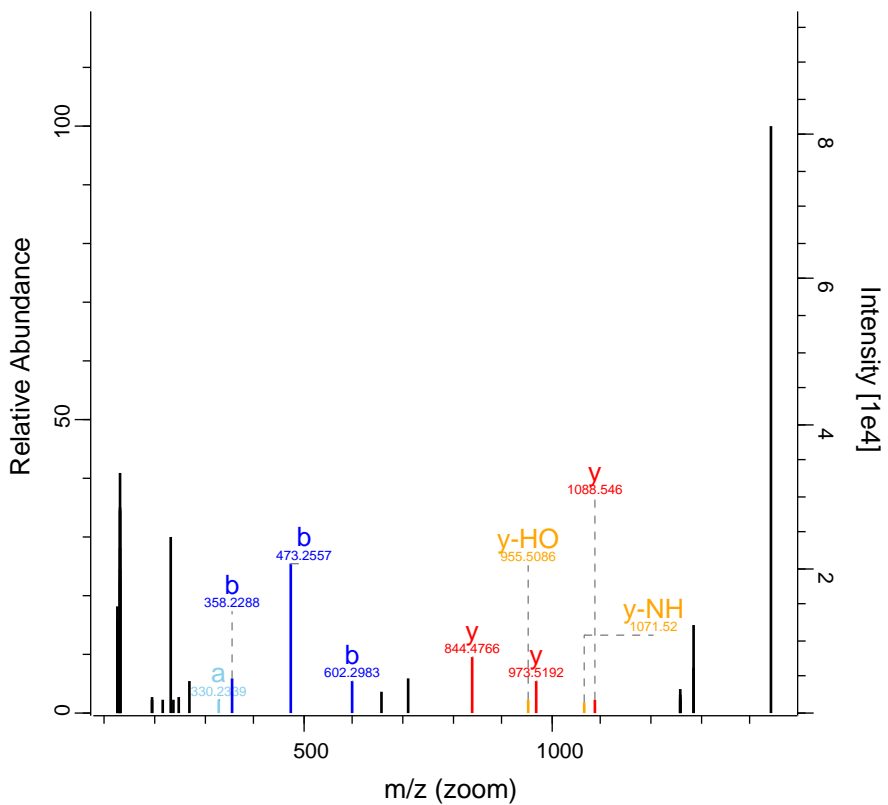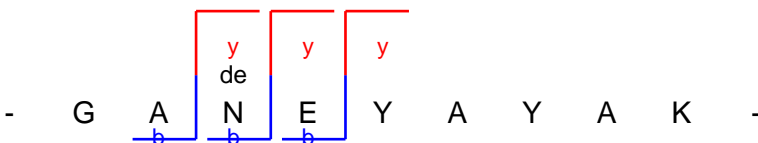

RO-QC-160121\_ZackD\_SS\_Set\_02\_Fraction 5073 FTMS; HCl 99.75 577.29 SPAG5

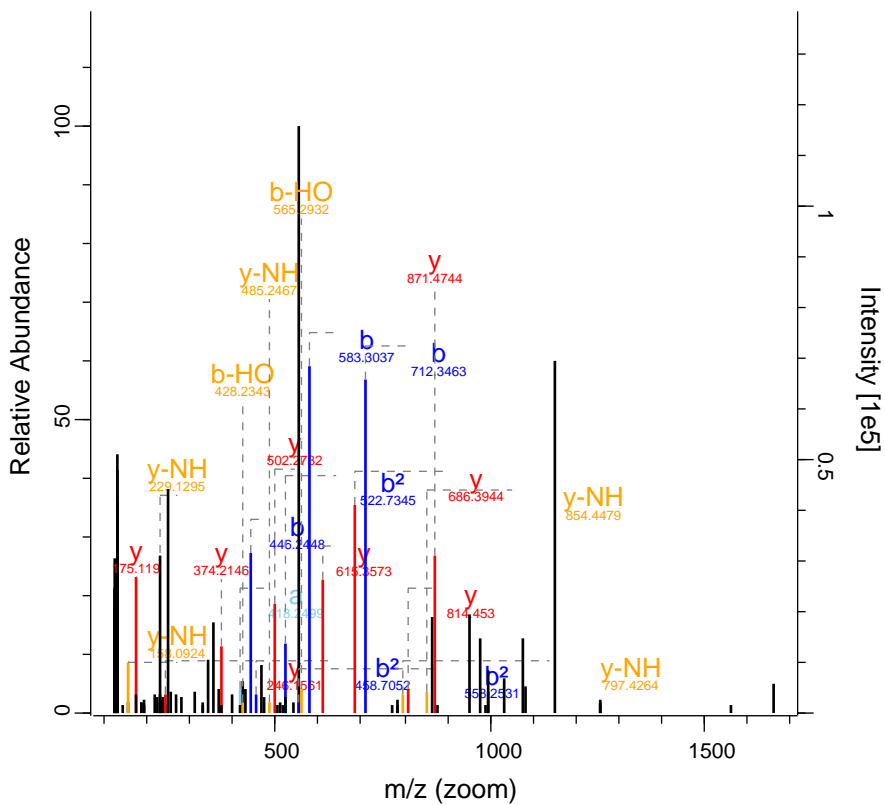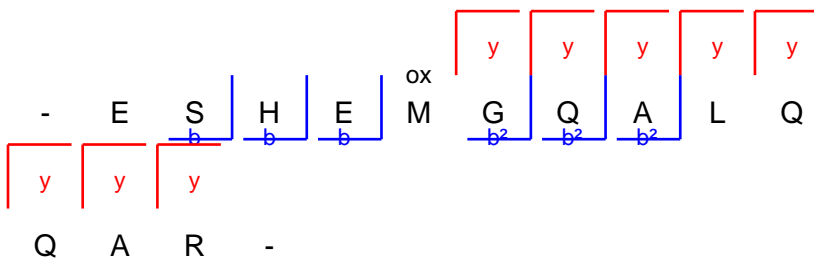

RO-QC-160121\_ZackD\_SS\_Set\_02\_Fraction 5238 FTMS; HC 105.25 577.29 SPAG5

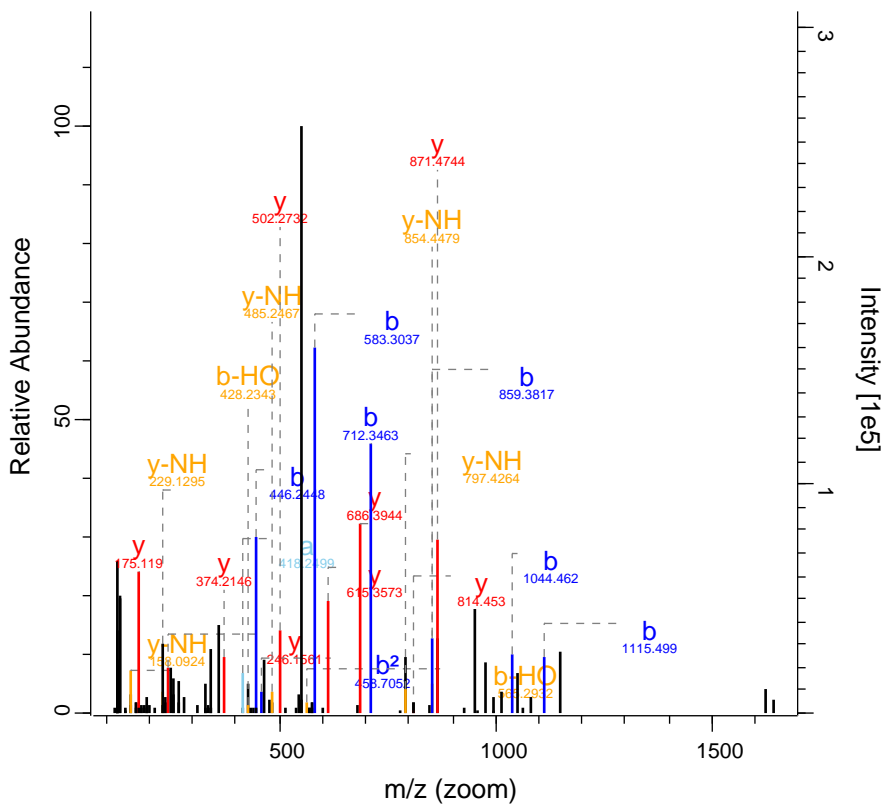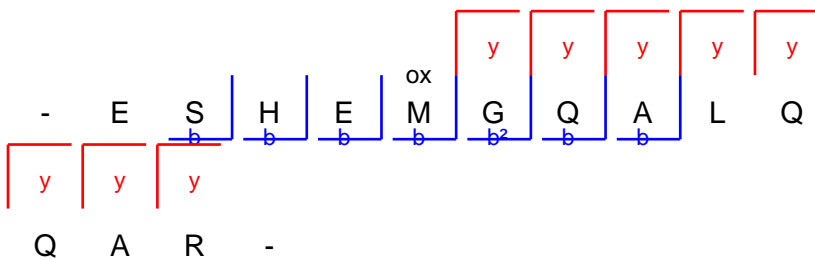

RO-QC-160121\_ZackD\_SS\_Set\_02\_Fraction 5628 FTMS; HC 175.44 621.34 FAM89A

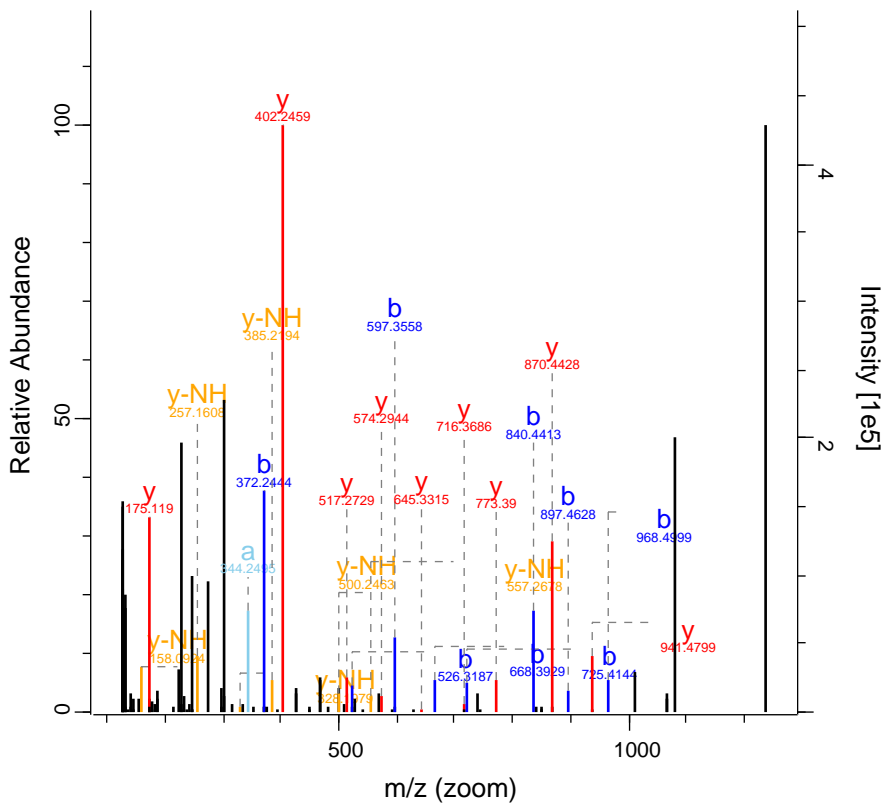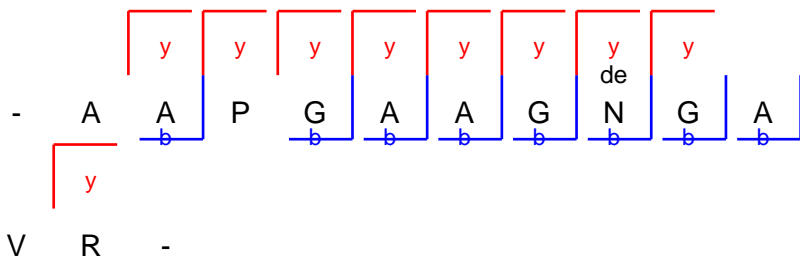

RO-QC-160121\_ZackD\_SS\_Set\_02\_Fraction 5757 FTMS; HCl 93.11 367.42 GTF3A

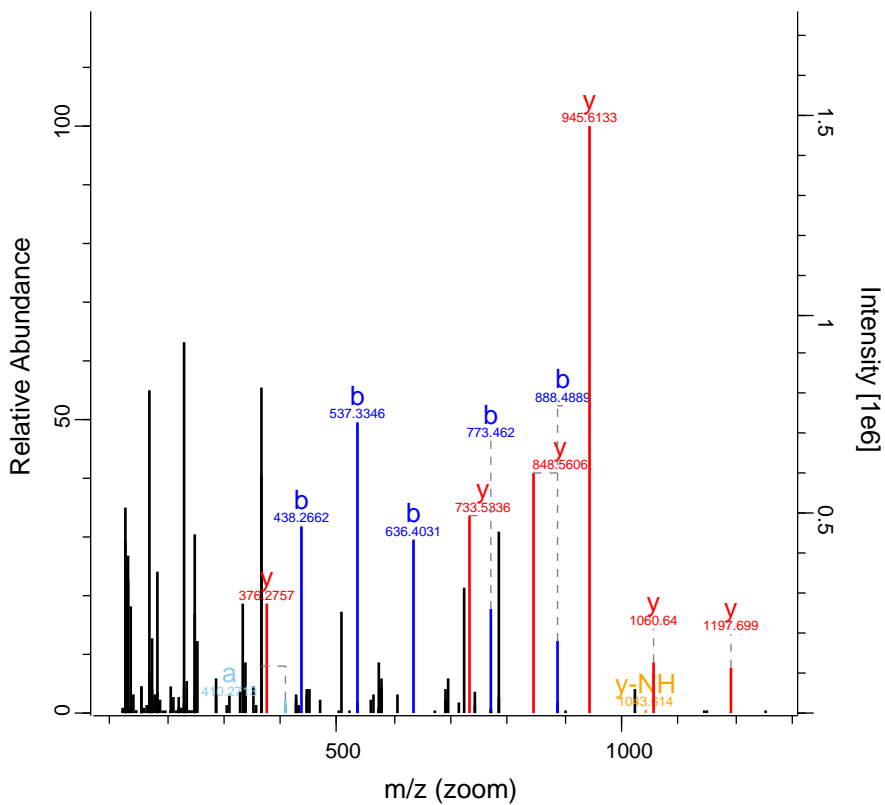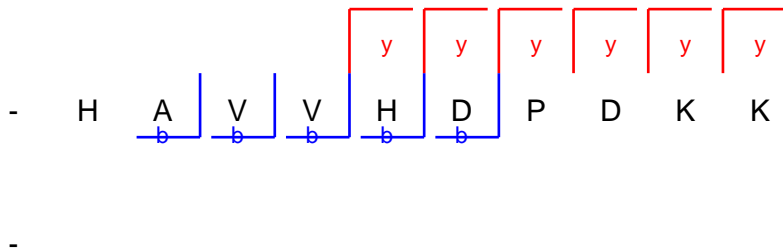



RO-QC-160121\_ZackD\_SS\_Set\_02\_Fraction 6144 FTMS; HCl 67.56 407.97 CBX2

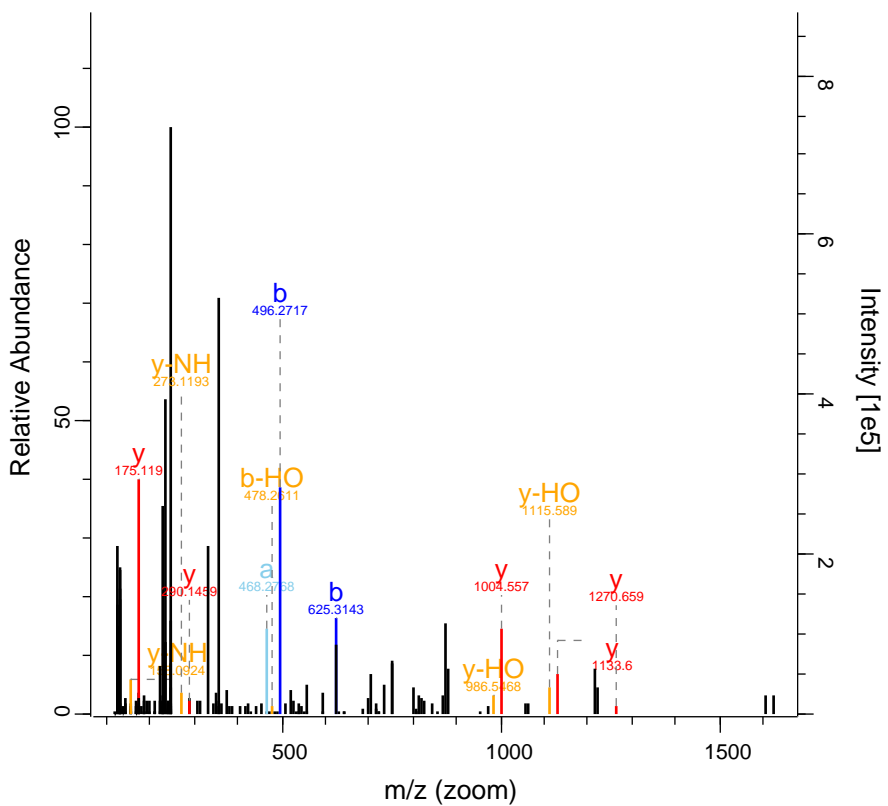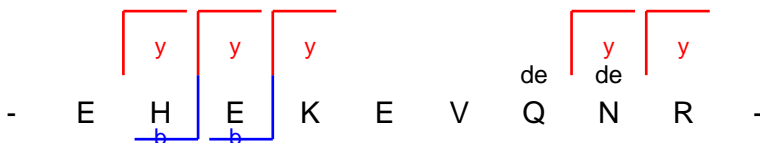

RO-QC-160121\_ZackD\_SS\_Set\_02\_Fraction 6381 FTMS; HCl 81.31 658.01 KIF26B

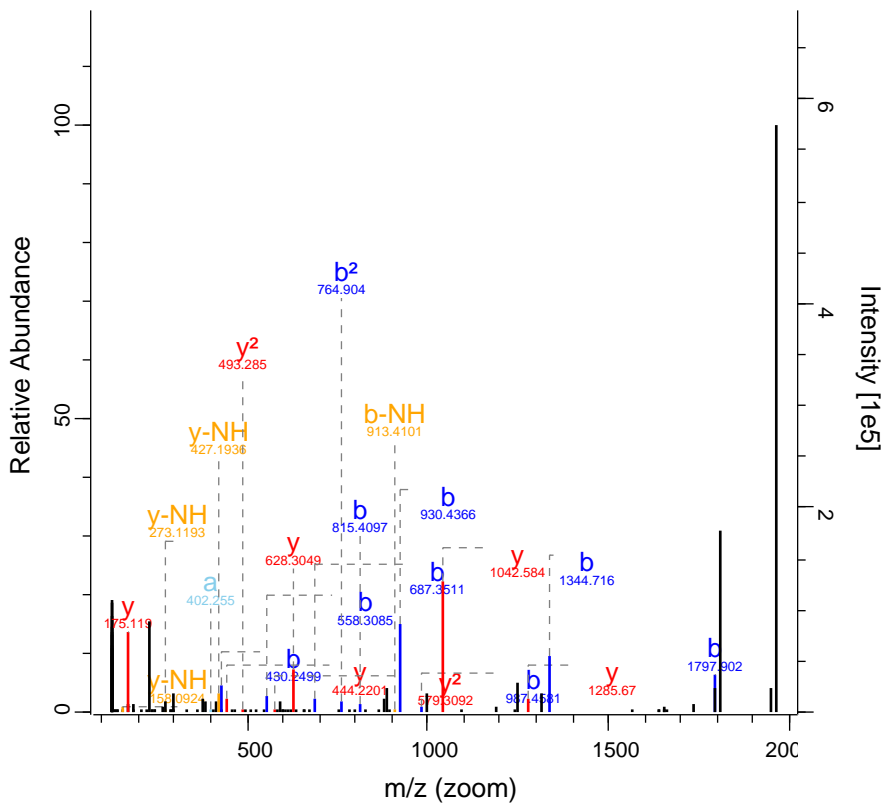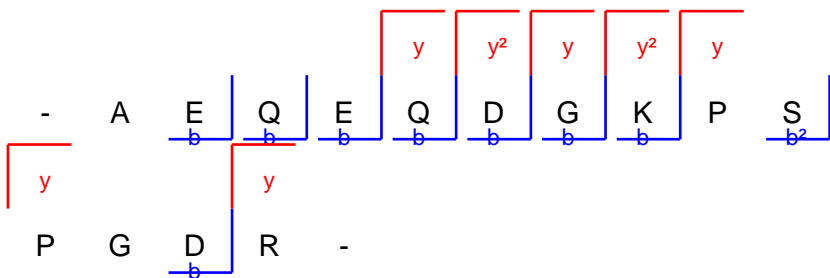

RO-QC-160121\_ZackD\_SS\_Set\_02\_Fraction 6661 FTMS; HCl 99.52 539.61 SEMA5A

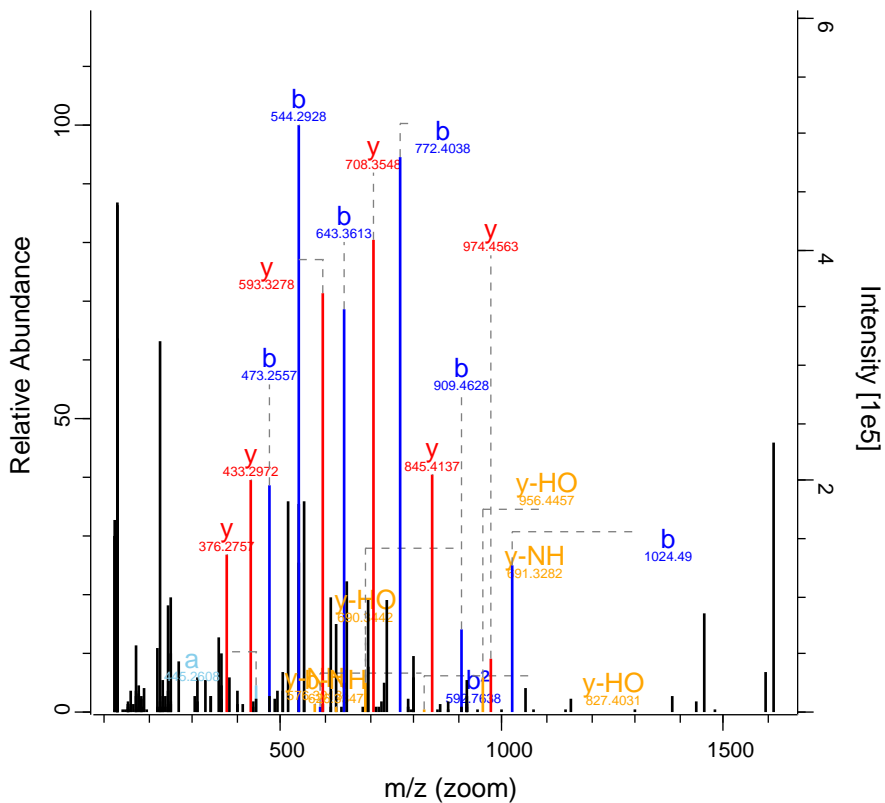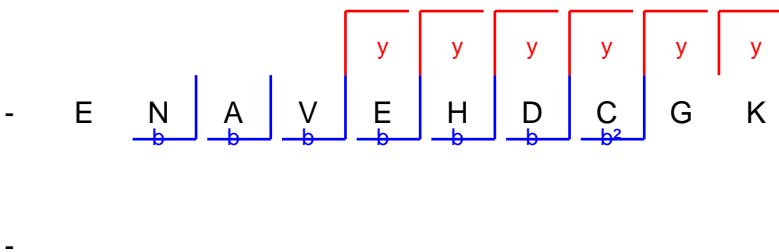

RO-QC-160121\_ZackD\_SS\_Set\_02\_Fraction 6823 FTMS; HC 161.21 646.04 UTP23

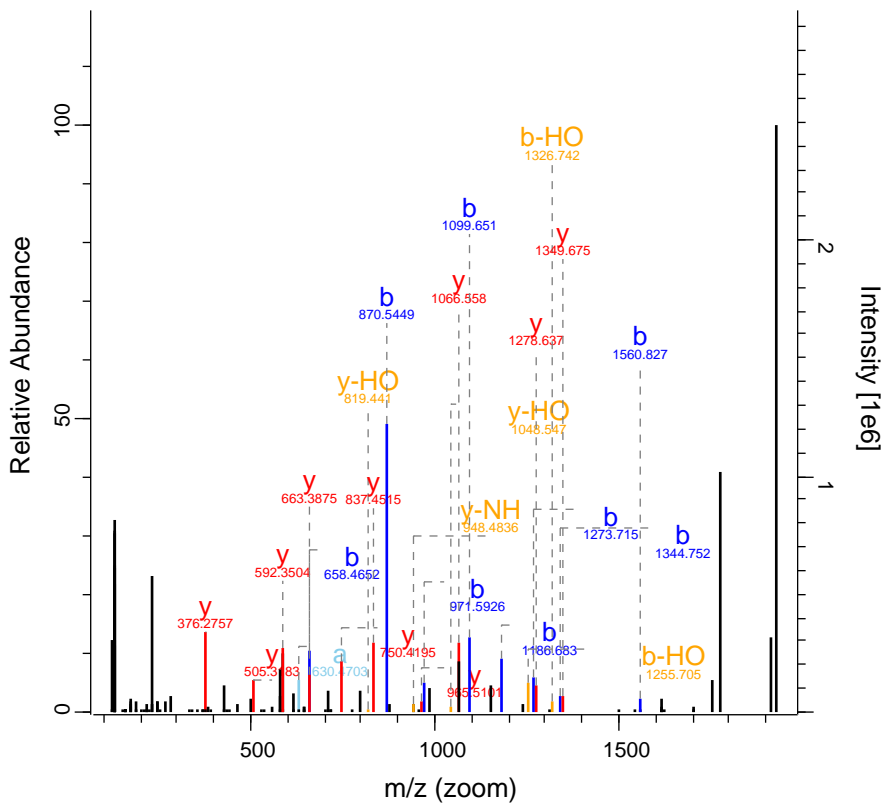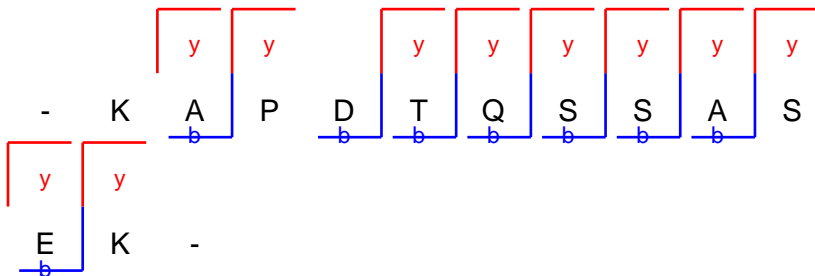

RO-QC-160121\_ZackD\_SS\_Set\_02\_Fraction 7114 FTMS; HCl 69.95 652.33 NIPAL3

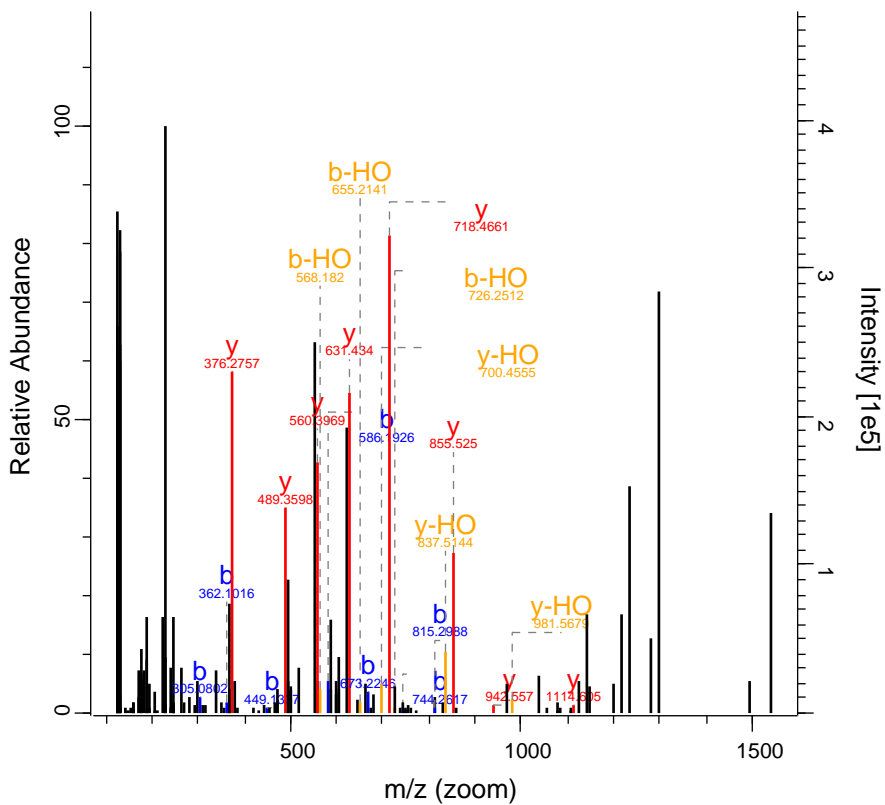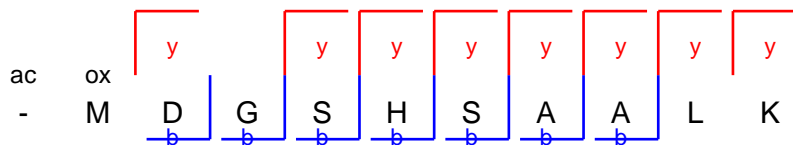

RO-QC-160121\_ZackD\_SS\_Set\_02\_Fraction 10291 FTMS; HC 69.44 633.84 CFHR2

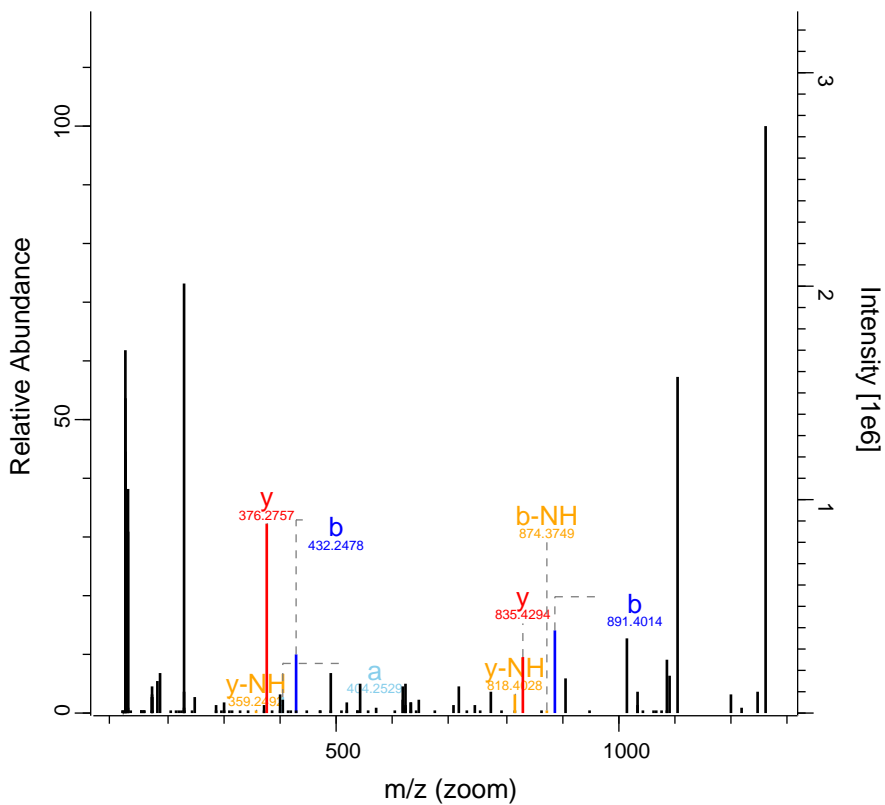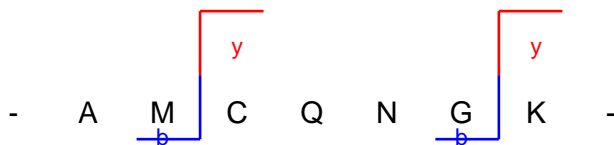

RO-QC-160121\_ZackD\_SS\_Set\_02\_Fractio 10685 FTMS; HC 145.89 397.48 ZFP64

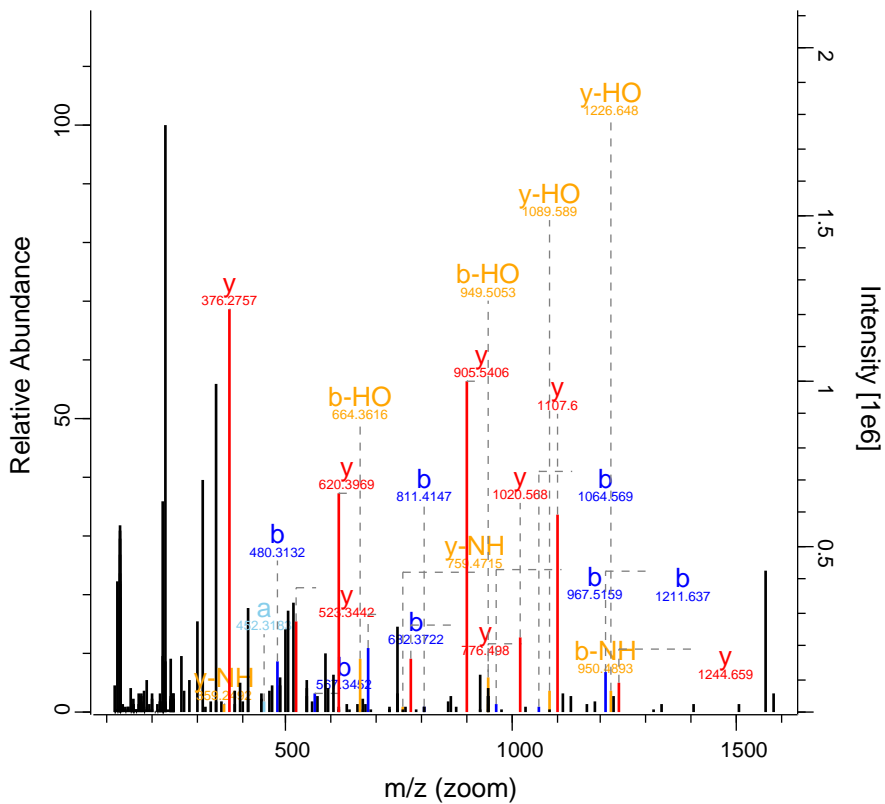

m/z (zoom)

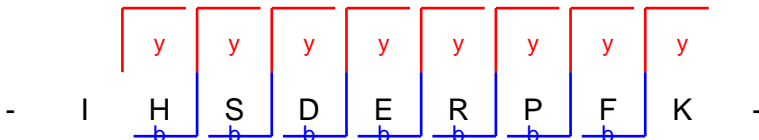

RO-QC-160121\_ZackD\_SS\_Set\_02\_Fraction10793 FTMS; HCl82.48 733.7 SSPN

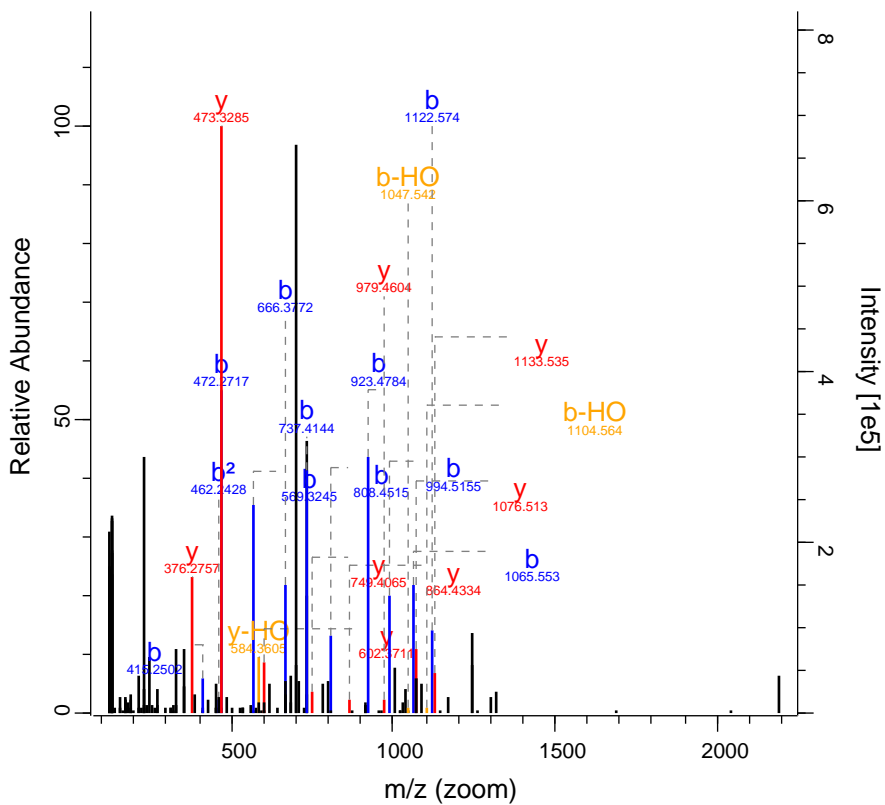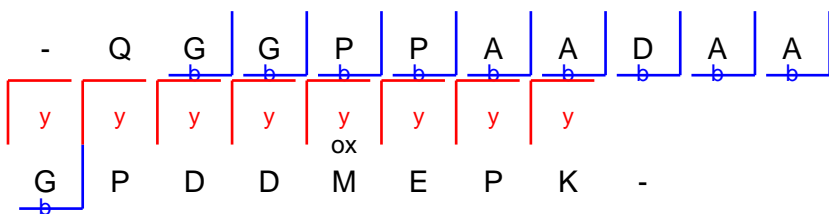



RO-QC-160121\_ZackD\_SS\_Set\_02\_Fraction 11138 FTMS; HC 52.23 641.84 CFHR2

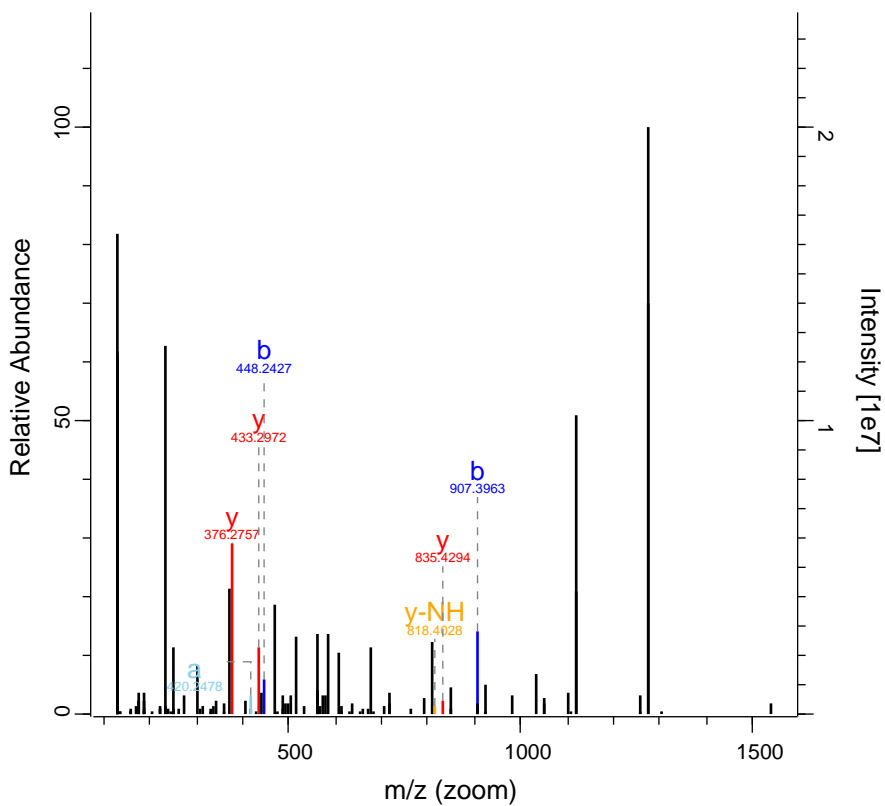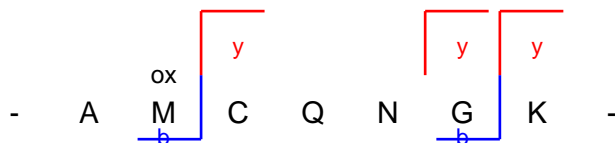

RO-QC-160121\_ZackD\_SS\_Set\_02\_Fraction 11243 FTMS; HC 42.81 717.36 TRAF1

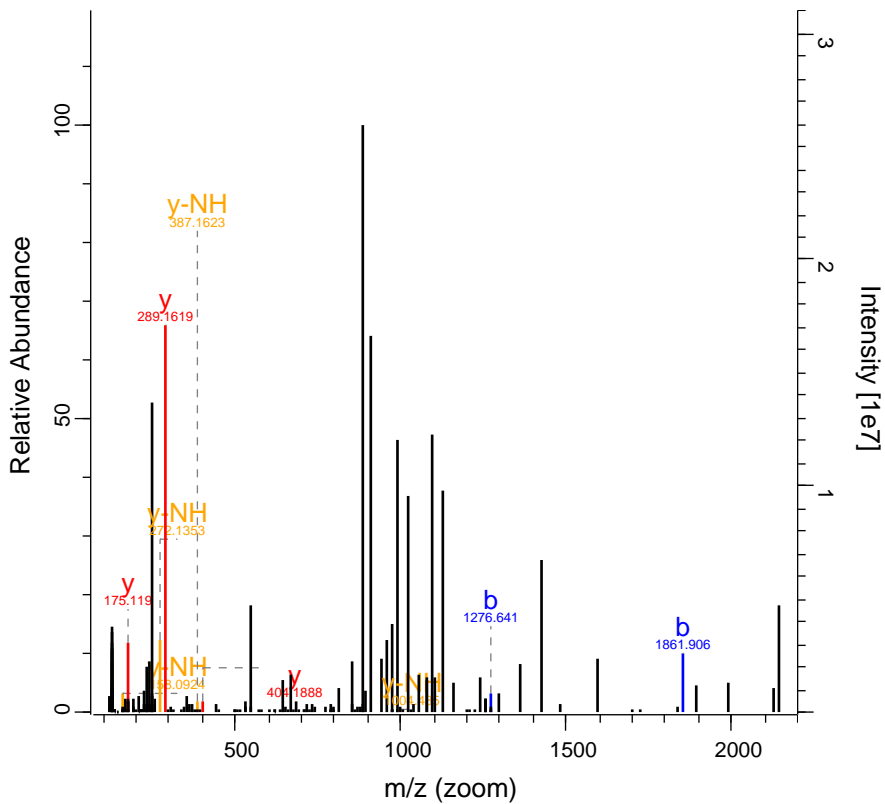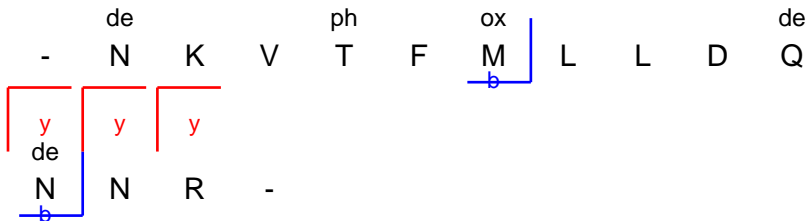

RO-QC-160121\_ZackD\_SS\_Set\_02\_Fraction11573 FTMS; HC 85.21 654.39 DNAJC15

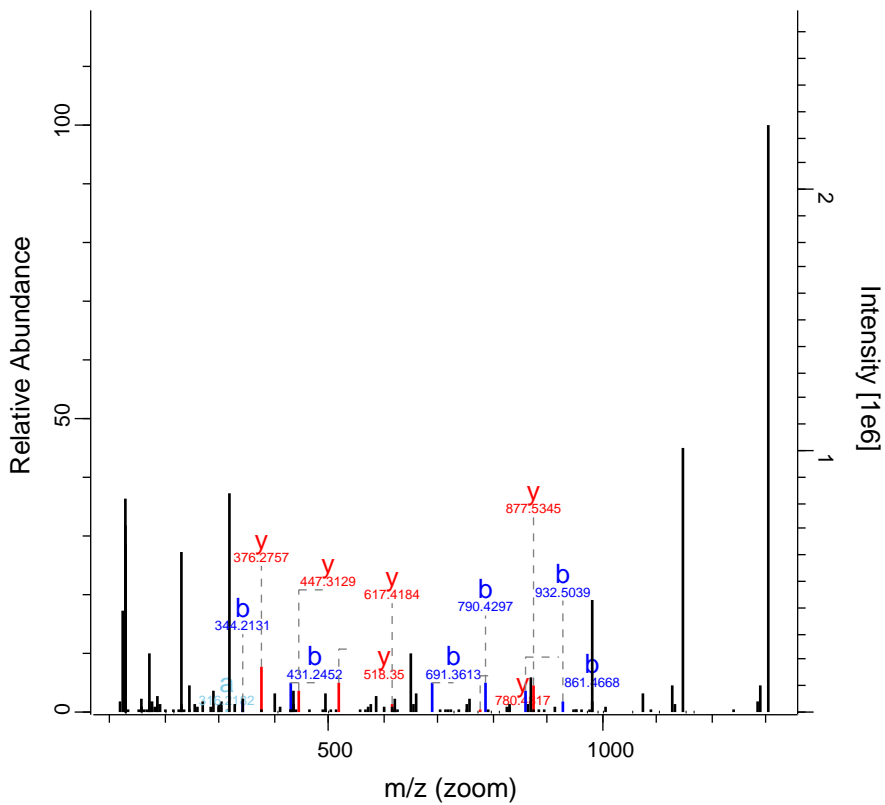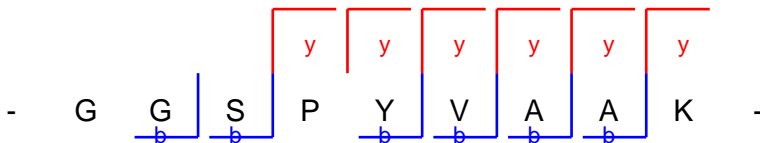

RO-QC-160121\_ZackD\_SS\_Set\_02\_Fraction 12308 FTMS; HC 56.26 403.74 CCDC146

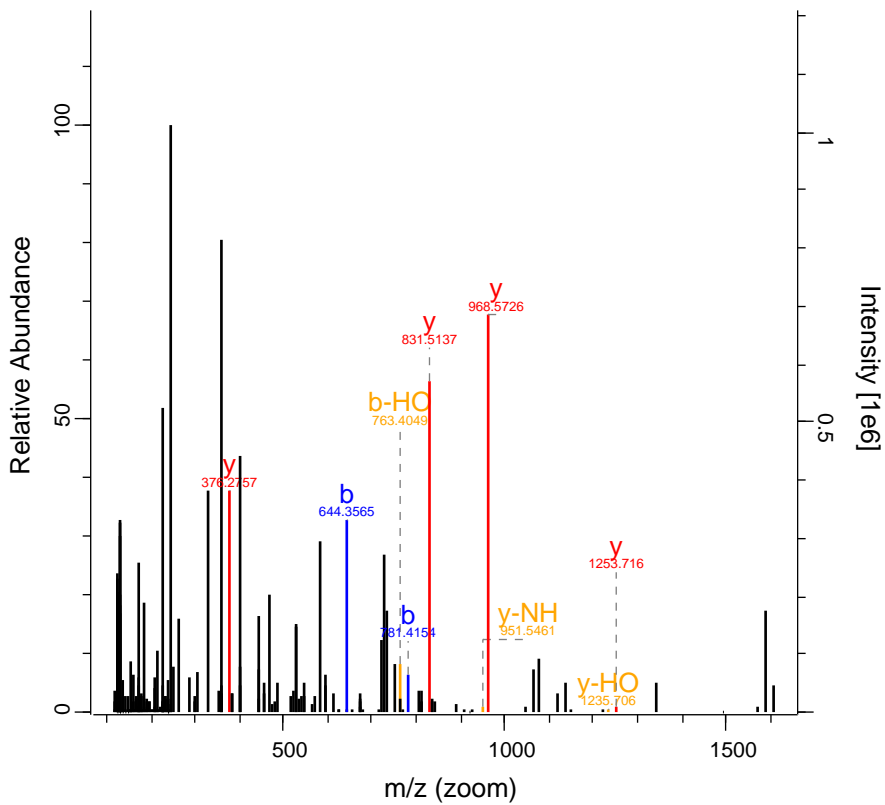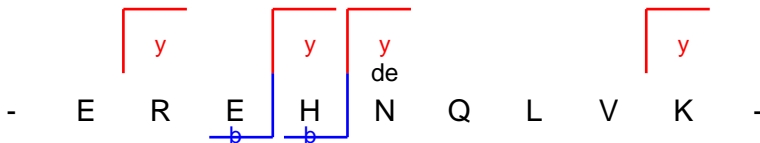

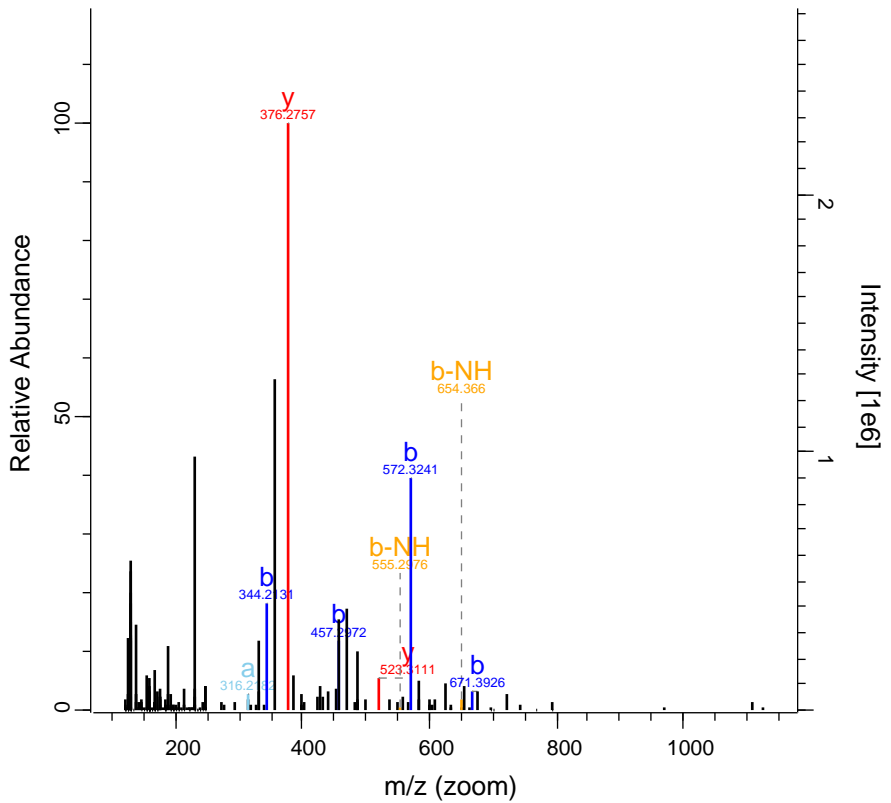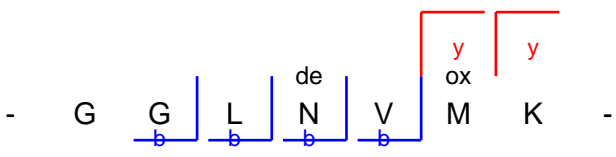

RO-QC-160121\_ZackD\_SS\_Set\_02\_Fraction 14553 FTMS; HC 85.21 824.47 AIPL1

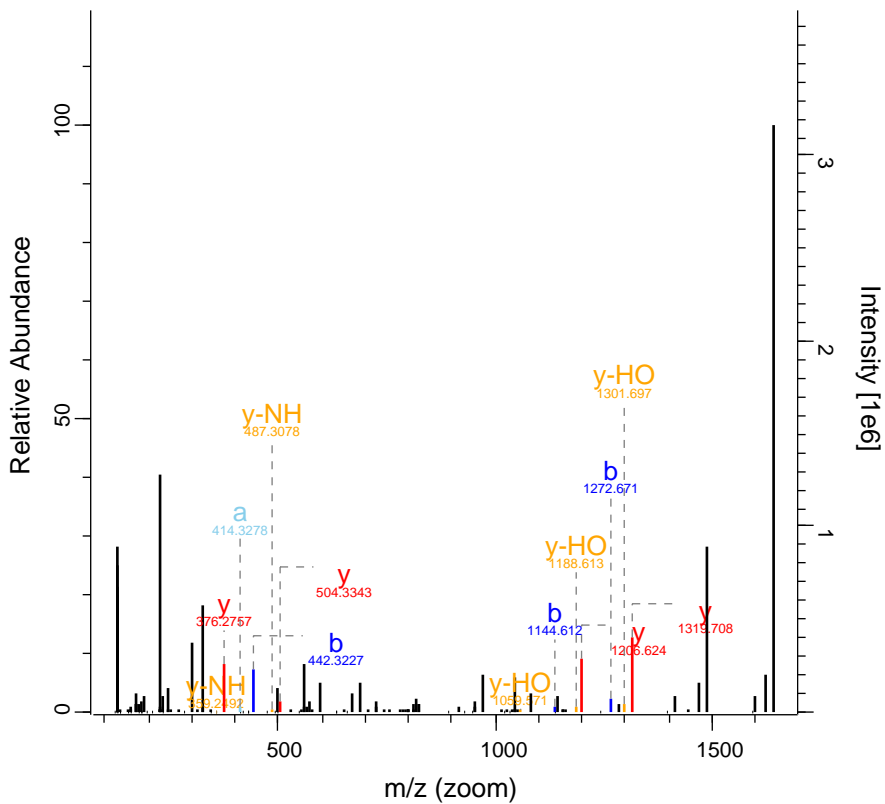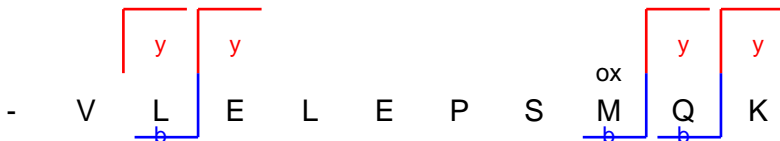

RO-QC-160121\_ZackD\_SS\_Set\_02\_Fractic 14622 FTMS; HC 49.63 1207.64 ATP6V0C

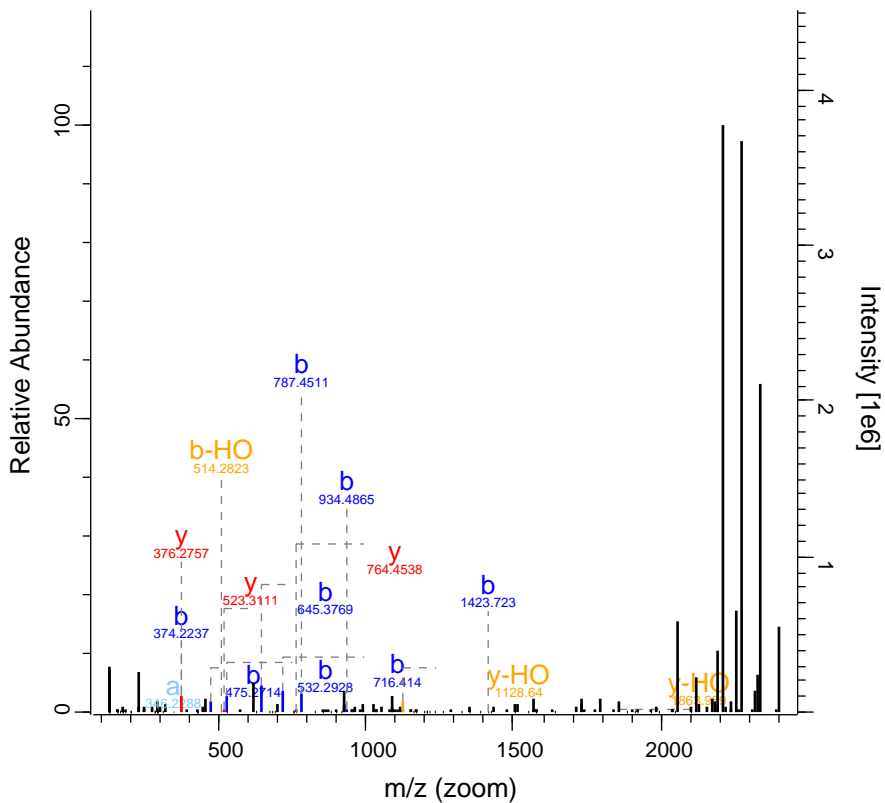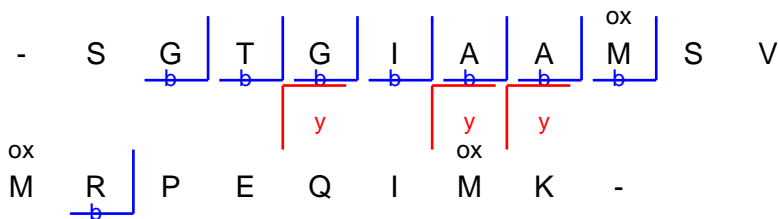

RO-QC-160121\_ZackD\_SS\_Set\_02\_Fraction 14643 FTMS; HC 44.3 604.32 ATP6V0C

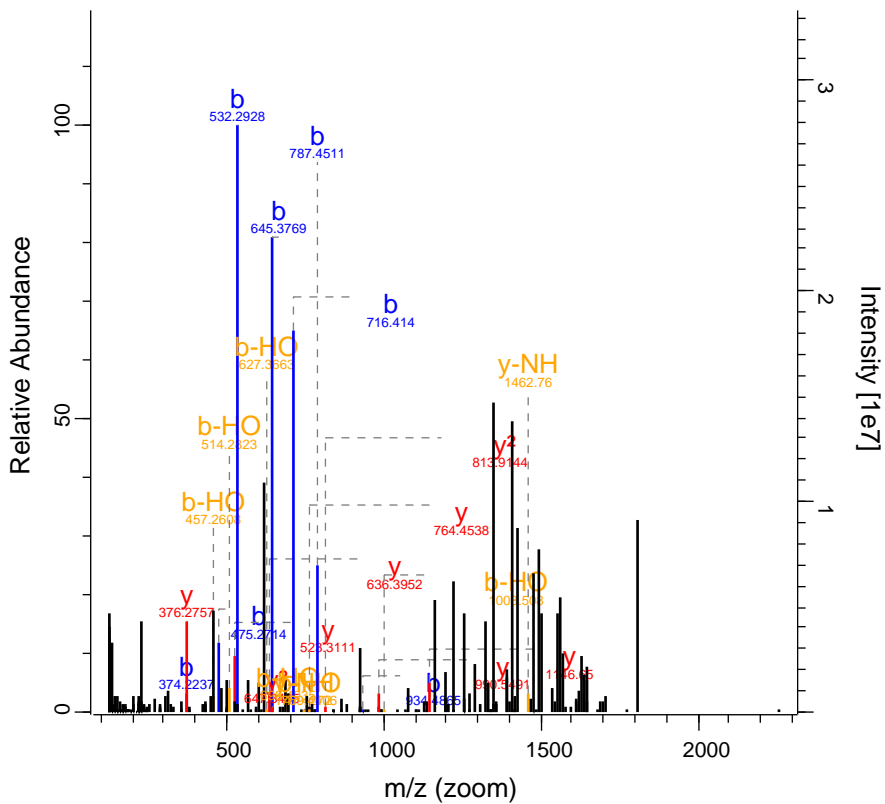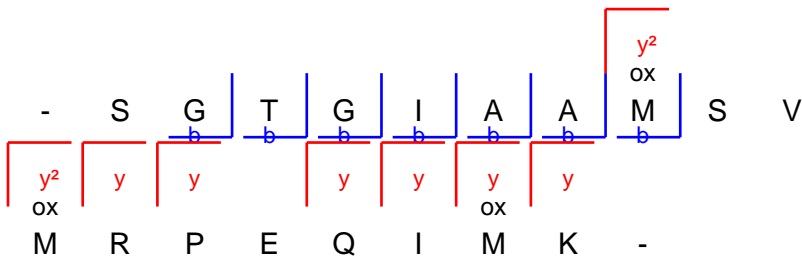



RO-QC-160121\_ZackD\_SS\_Set\_02\_Fraction 14801 FTMS; HC 73.26 824.47 AIPL1

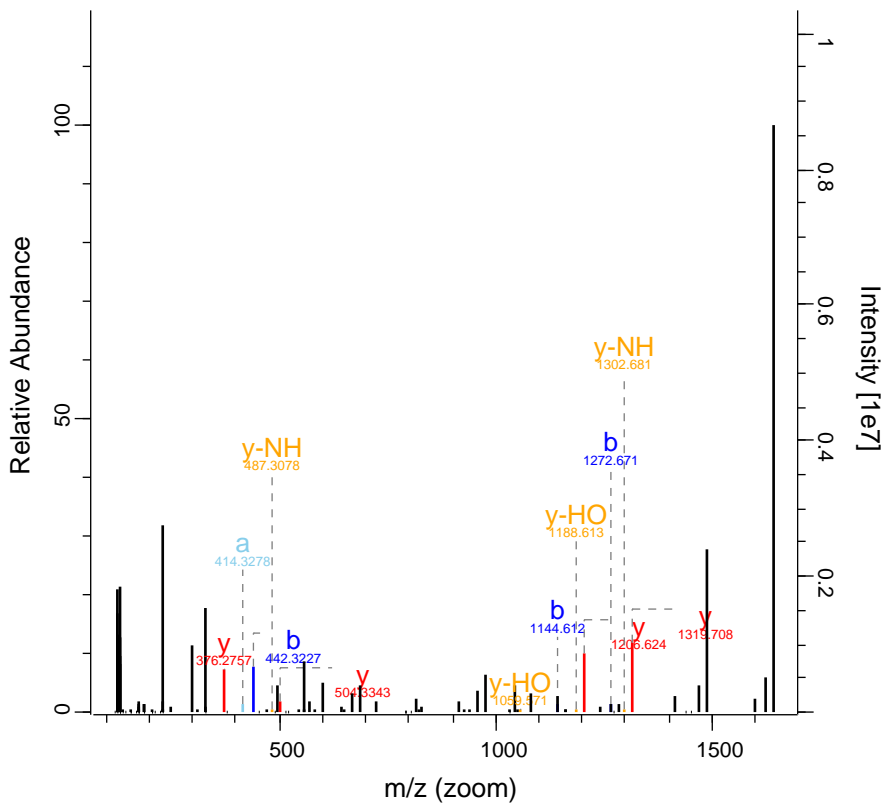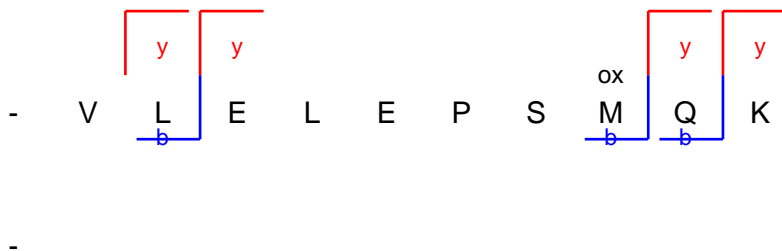

RO-QC-160121\_ZackD\_SS\_Set\_02\_Fractio 15584 FTMS; HC 116.73 602.82 NPC1L1

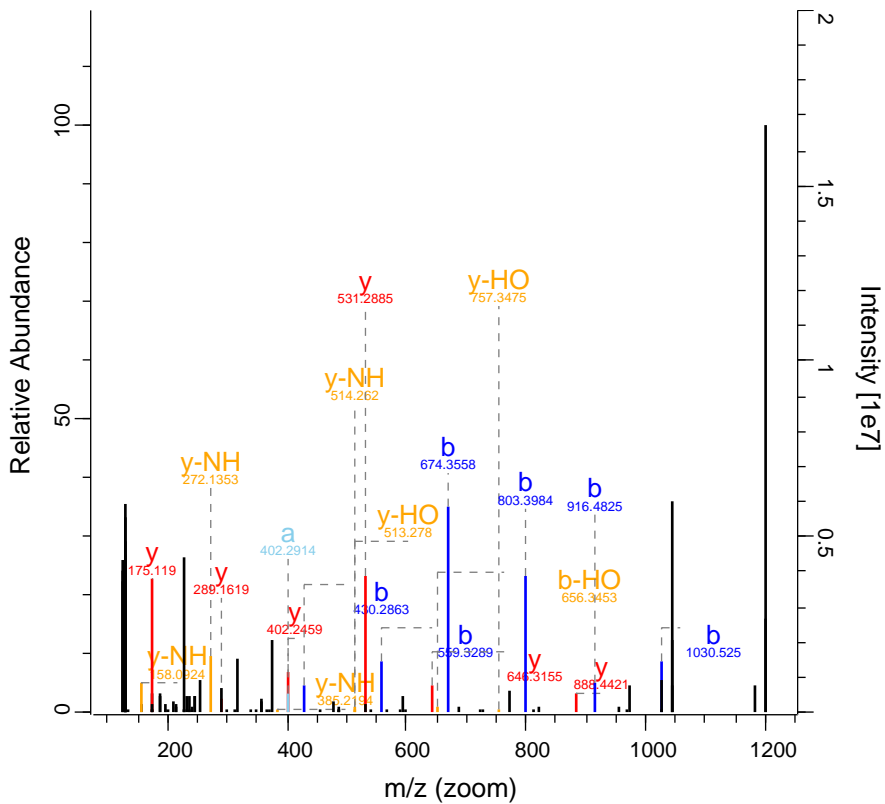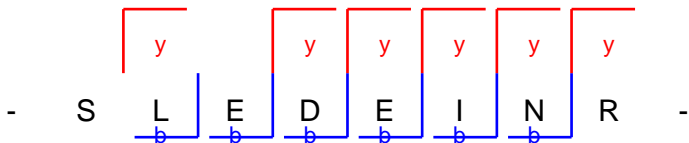

RO-QC-160121\_ZackD\_SS\_Set\_02\_Fraction 15624 FTMS; HC 58.98 432.91 TEKT5

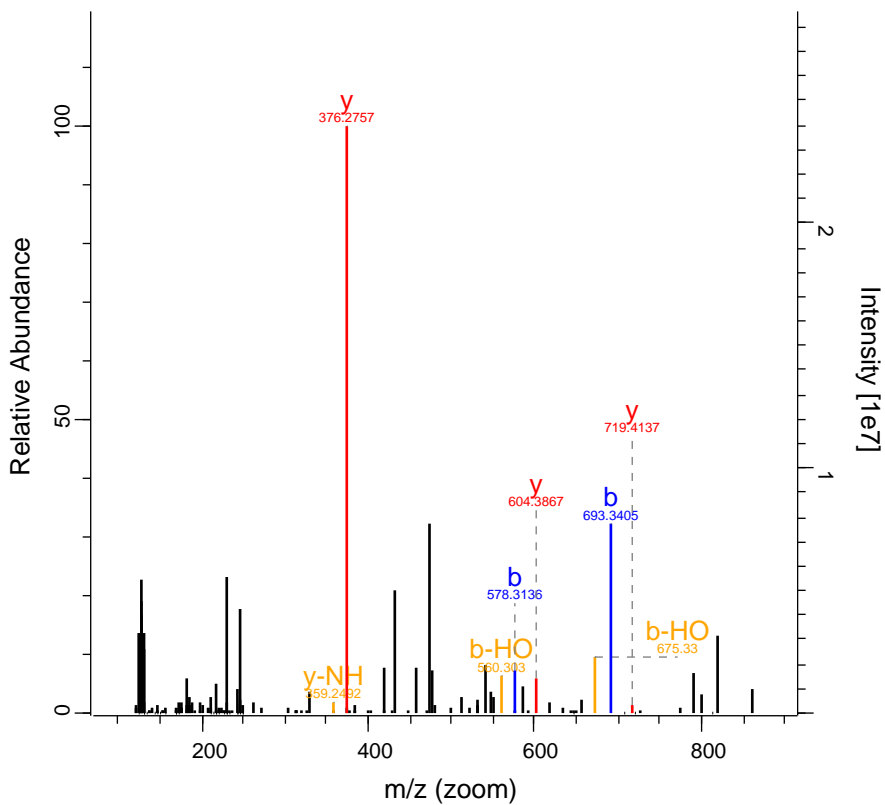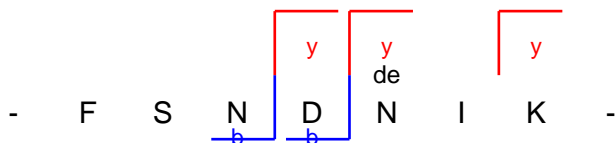

RO-QC-160121\_ZackD\_SS\_Set\_02\_Fraction 15799 FTMS; HC 94.87 602.82 NPC1L1

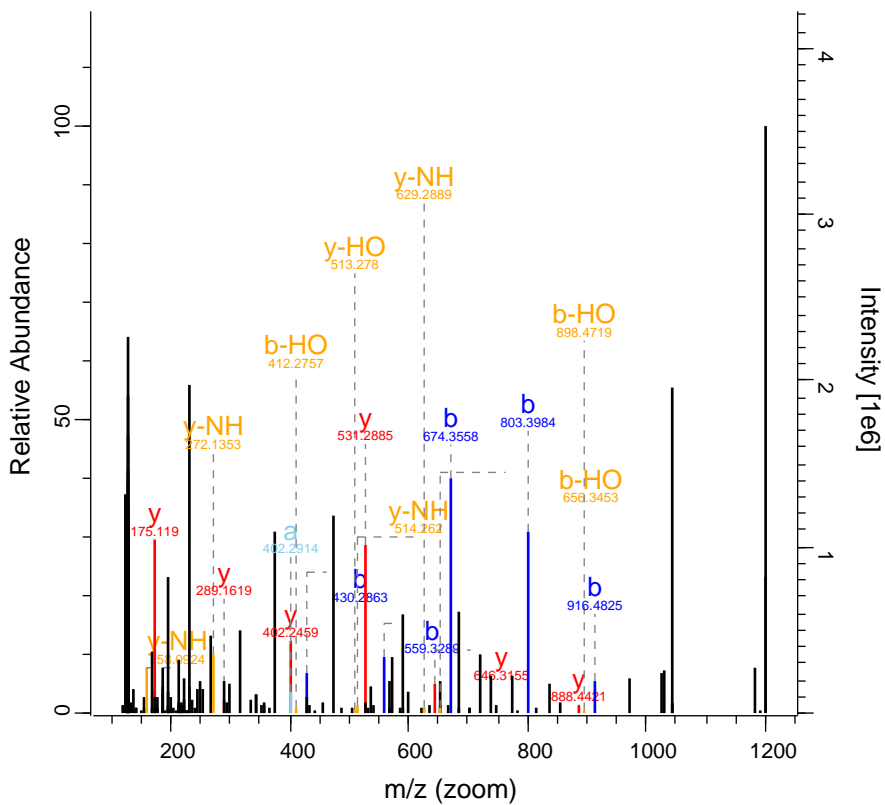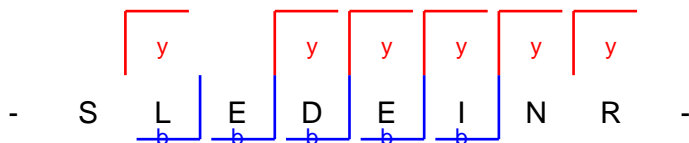

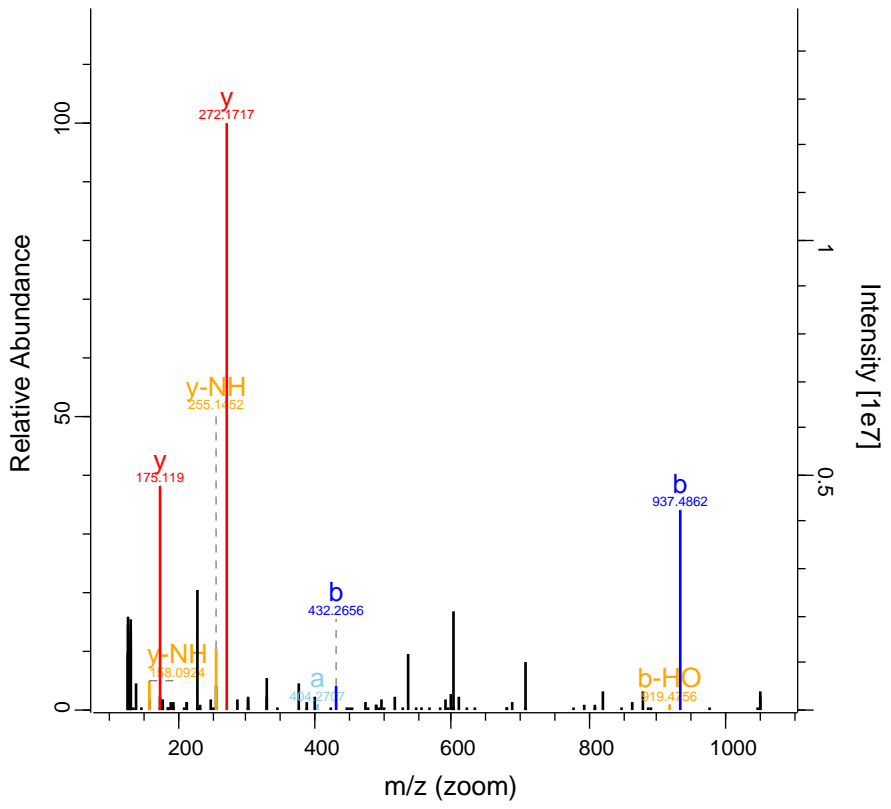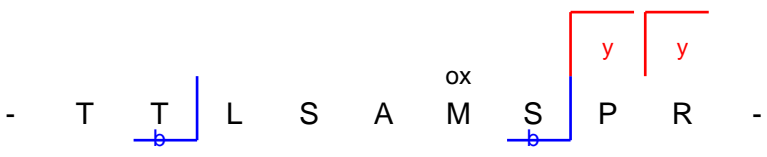

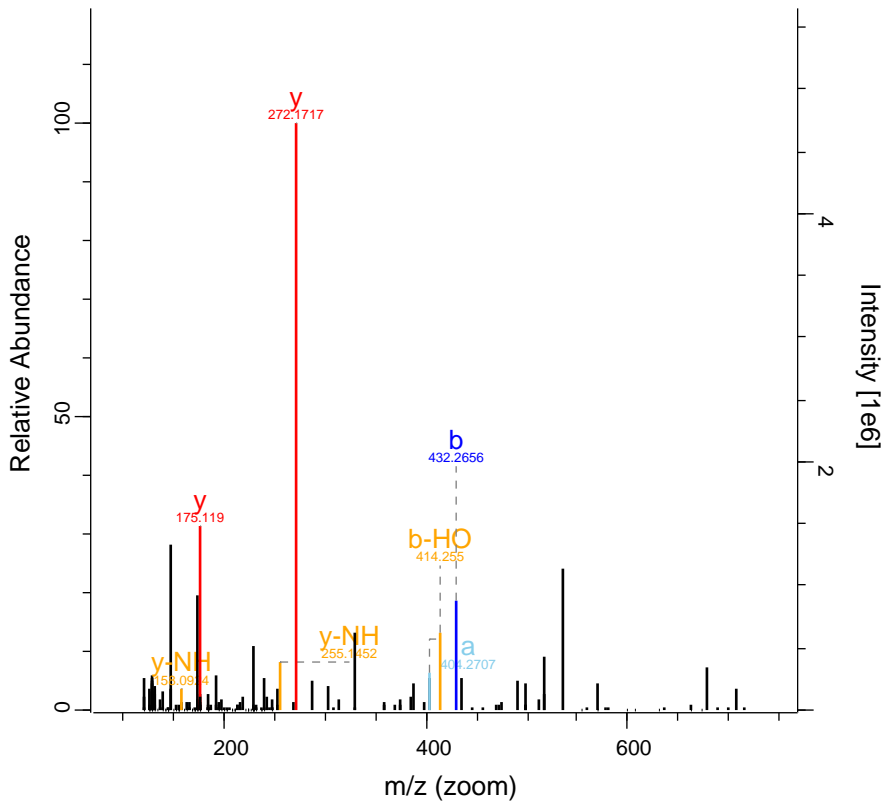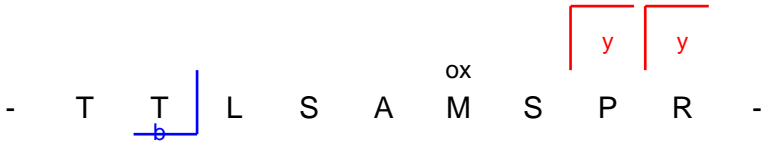

RO-QC-160121\_ZackD\_SS\_Set\_02\_Fraction 19477 FTMS; HC 43.38 755.08 GIMAP7

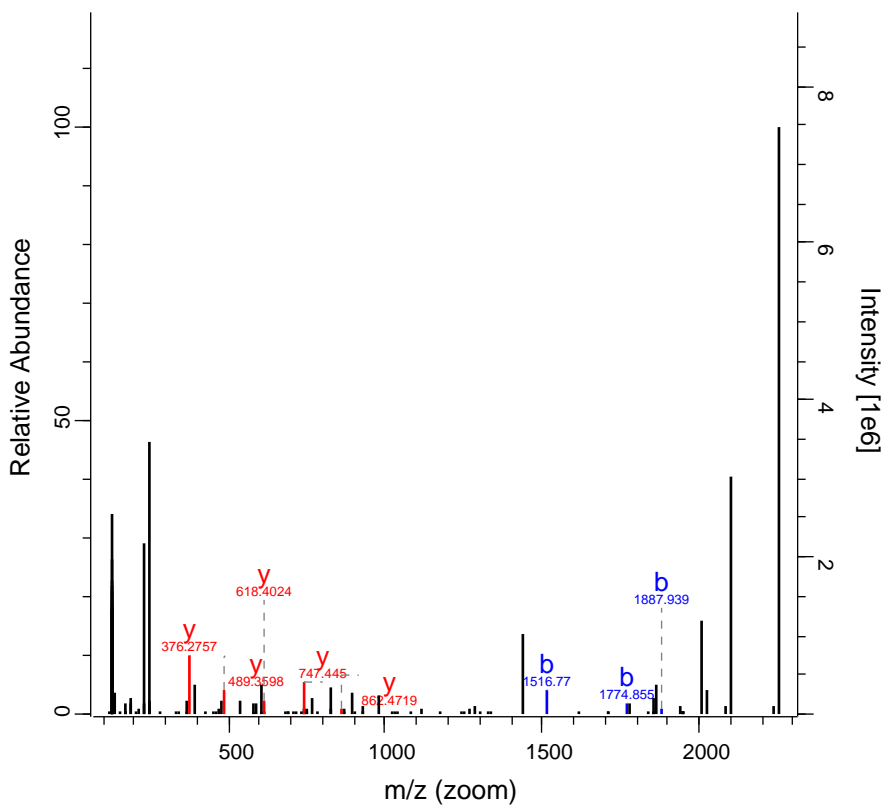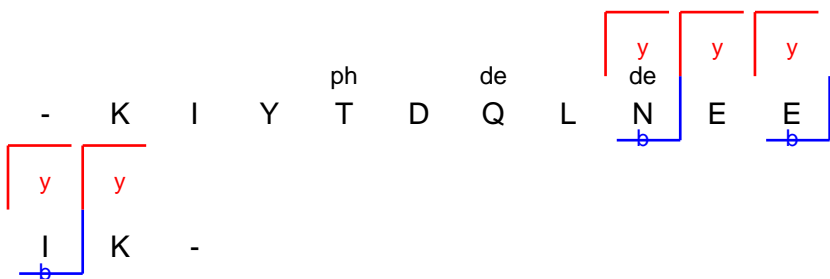

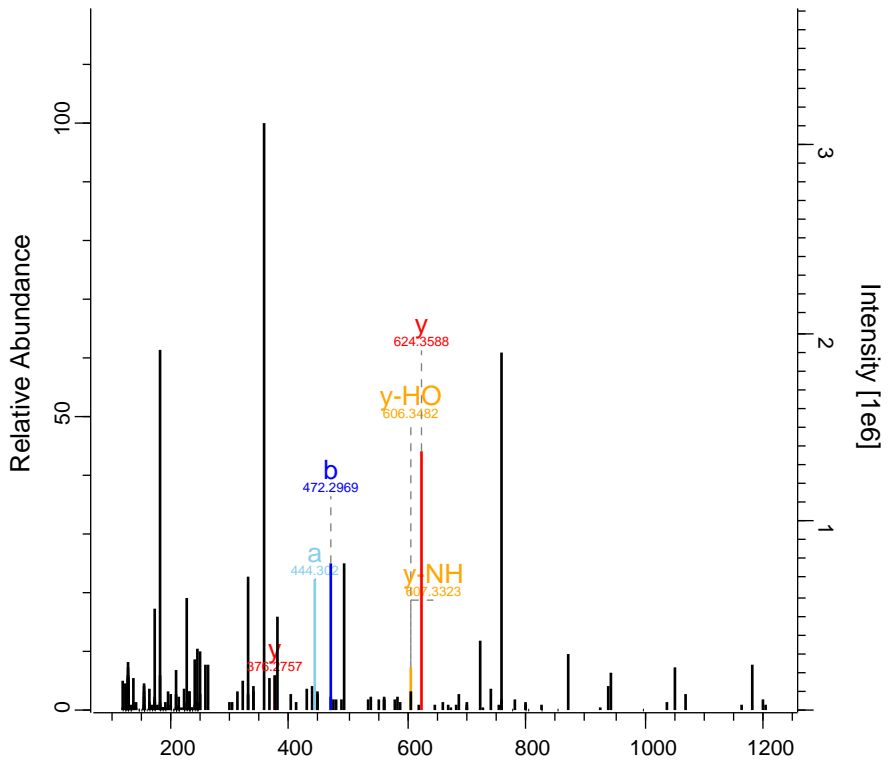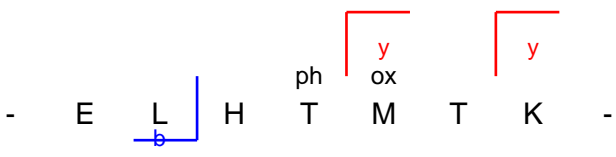



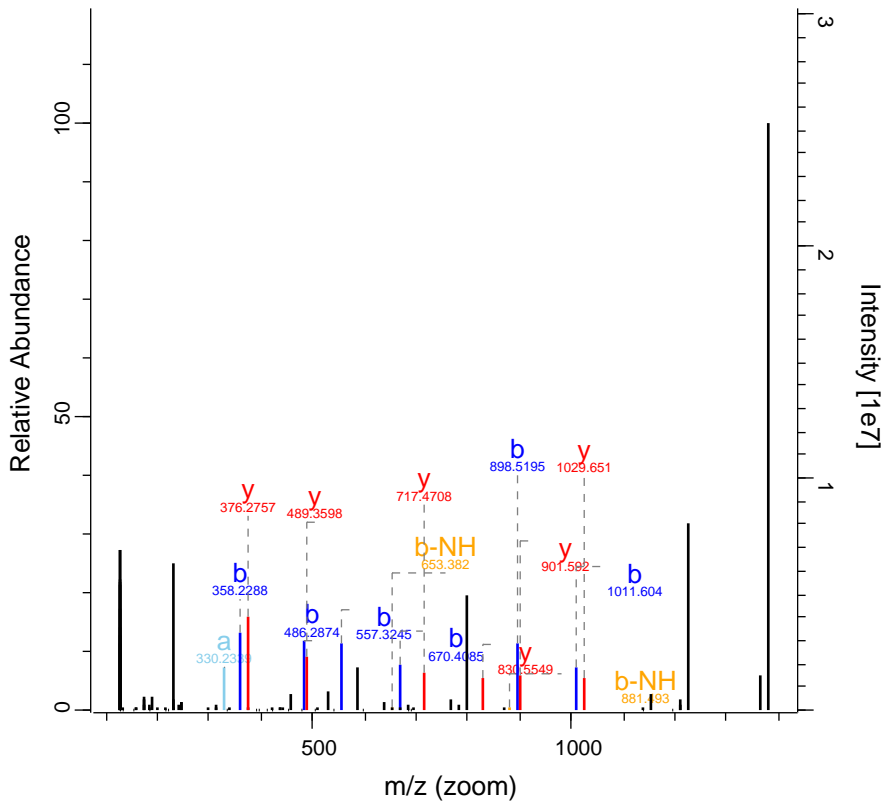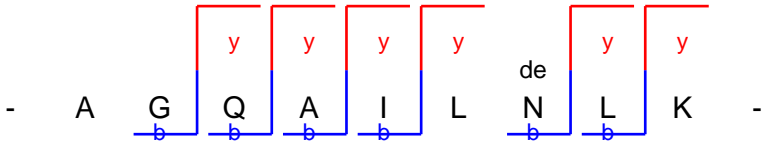



RO-QC-160121\_ZackD\_SS\_Set\_02\_Fraccio 20743 FTMS; HC 150.85 818.44 GPATCH2

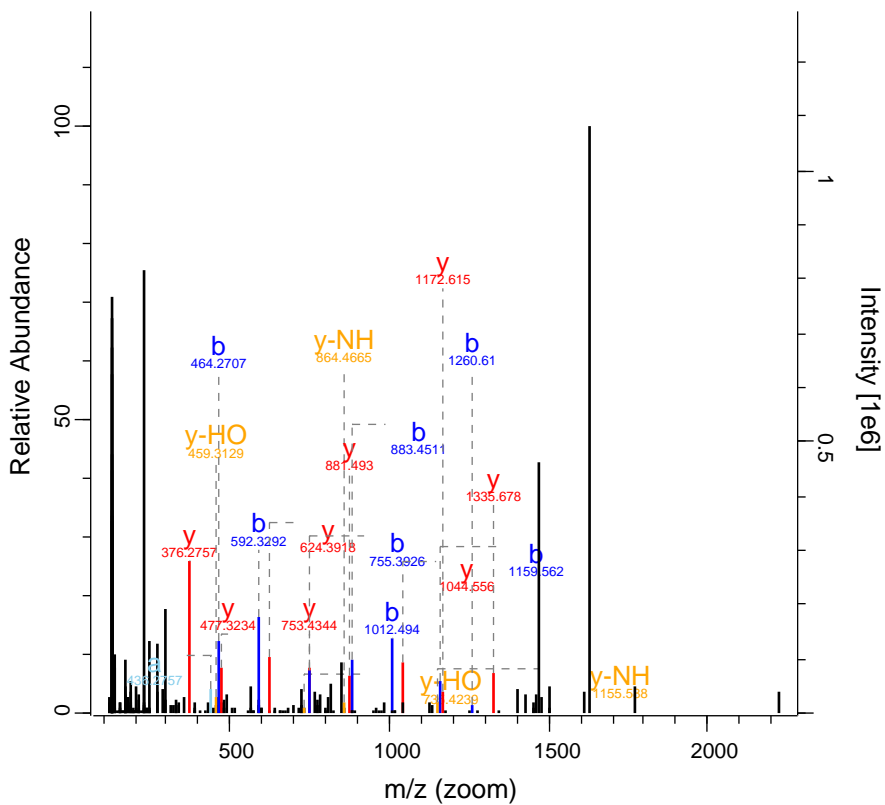

RO-QC-160121\_ZackD\_SS\_Set\_02\_Fraction 20924 FTMS; HC 70.82 741.42 SMPDL3A

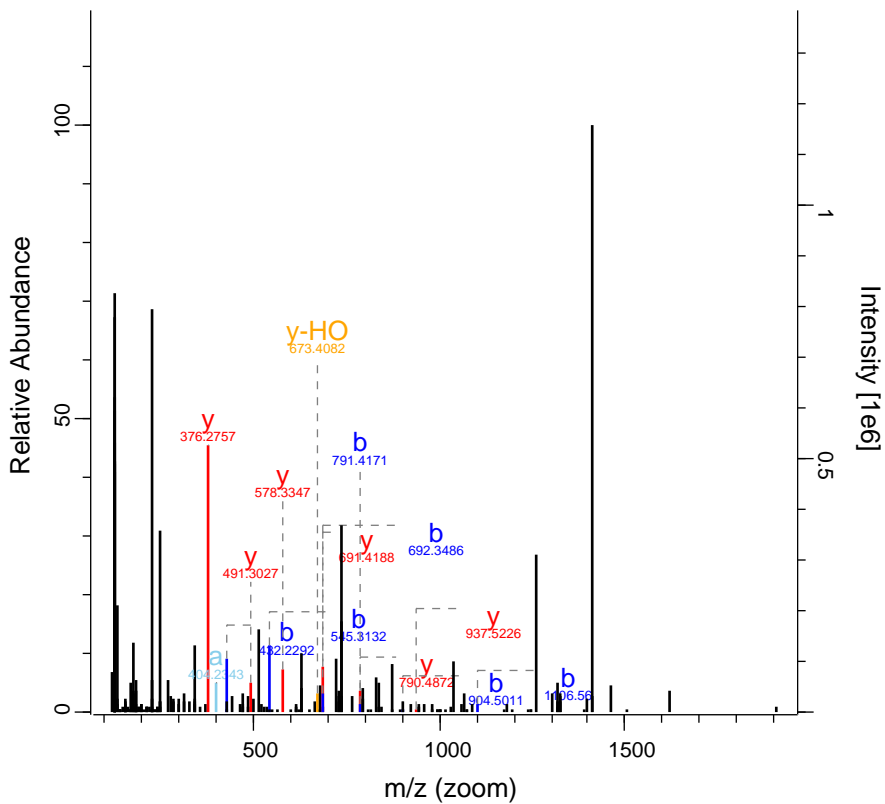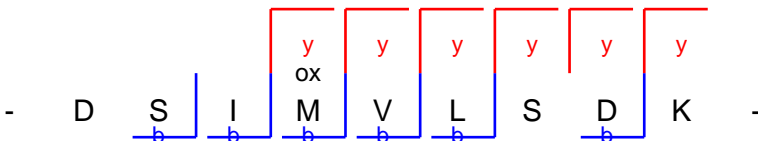

RO-QC-160121\_ZackD\_SS\_Set\_02\_Fraction 21197 FTMS; HC 43.54 589.33 SEC22A

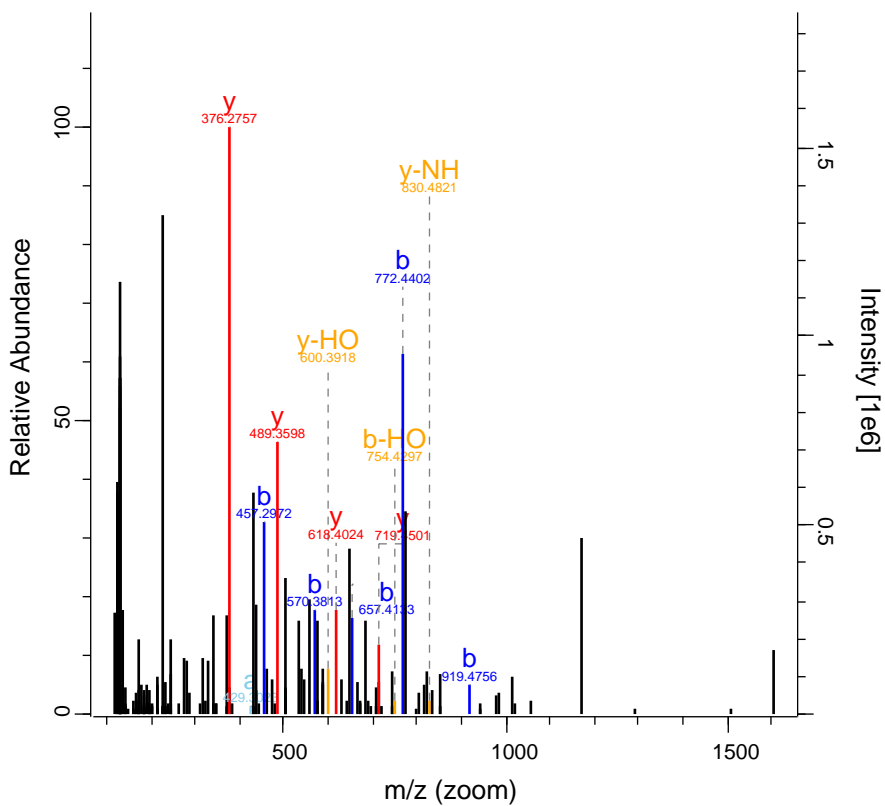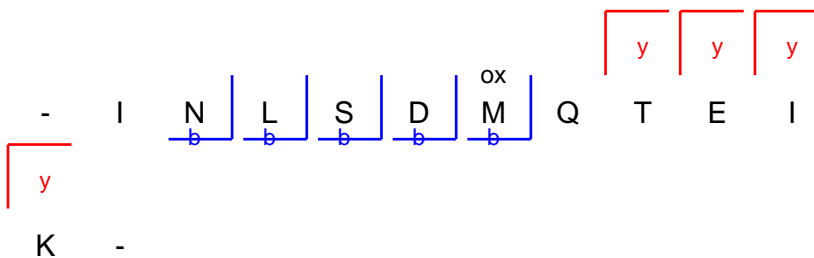

| Raw File                                | Scan  | Method    | Score | m/z    |
|-----------------------------------------|-------|-----------|-------|--------|
| RO-QC-160121_ZackD_SS_Set_02_Fraction_5 | 21646 | FTMS; HCD | 51.85 | 701.37 |

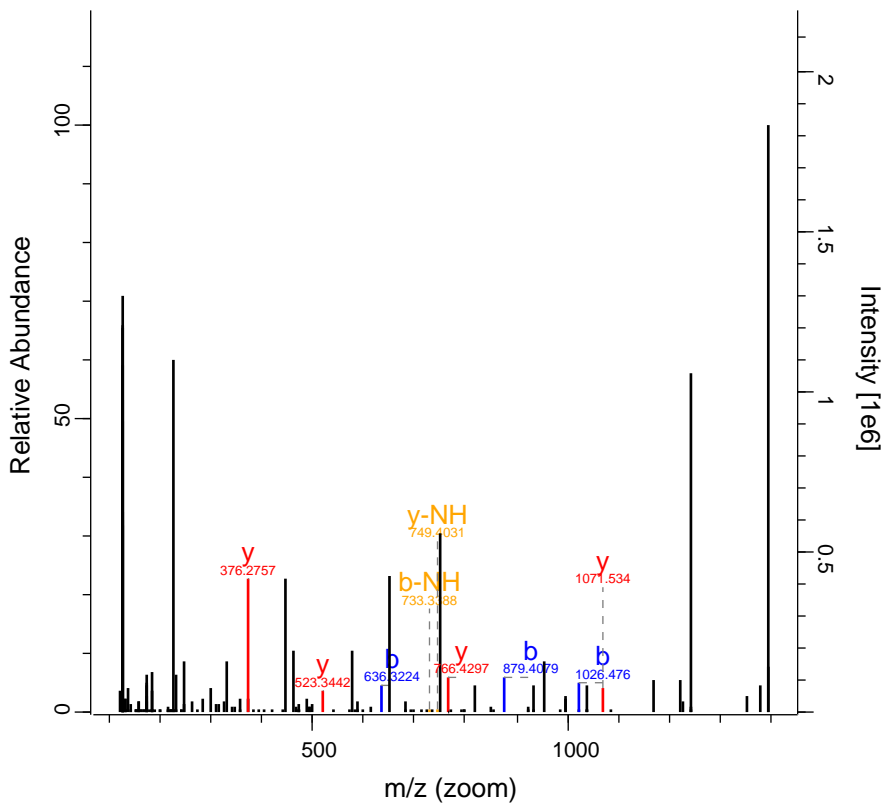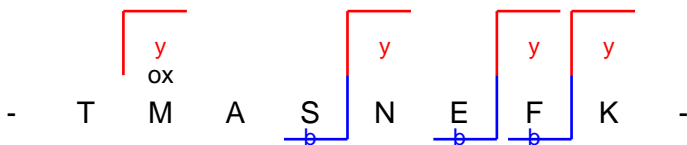

RO-QC-160121\_ZackD\_SS\_Set\_02\_Fraction 22090 FTMS; HC 92.49 600.86 TMEM167A

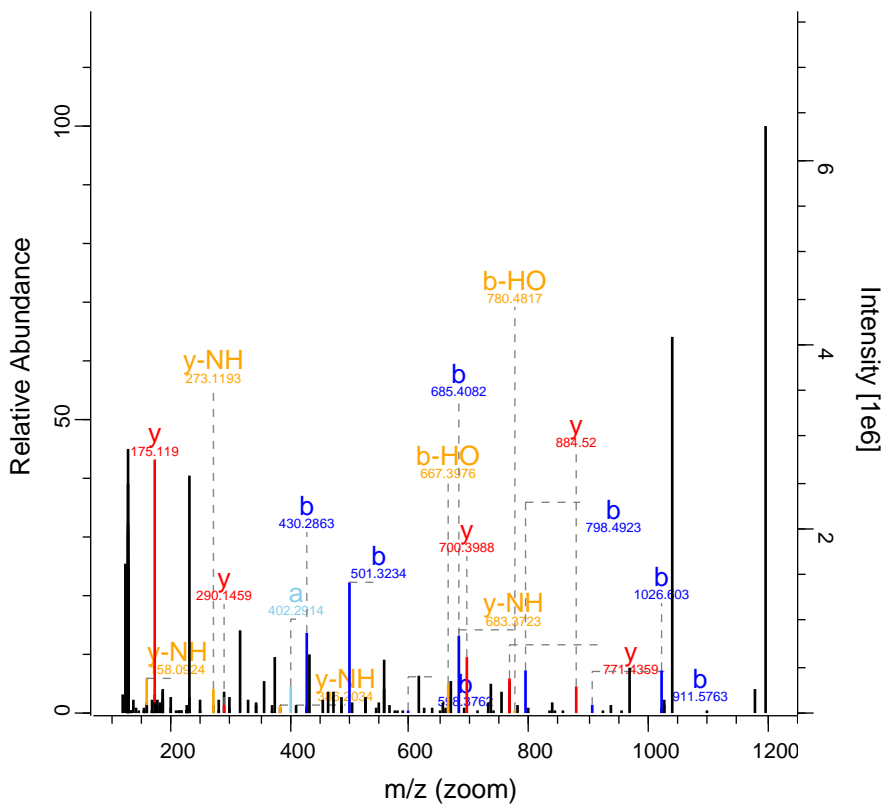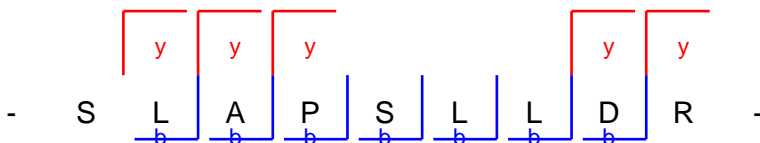

RO-QC-160121\_ZackD\_SS\_Set\_02\_Fraction 22255 FTMS; HCl47.07 750.9 TIAF1

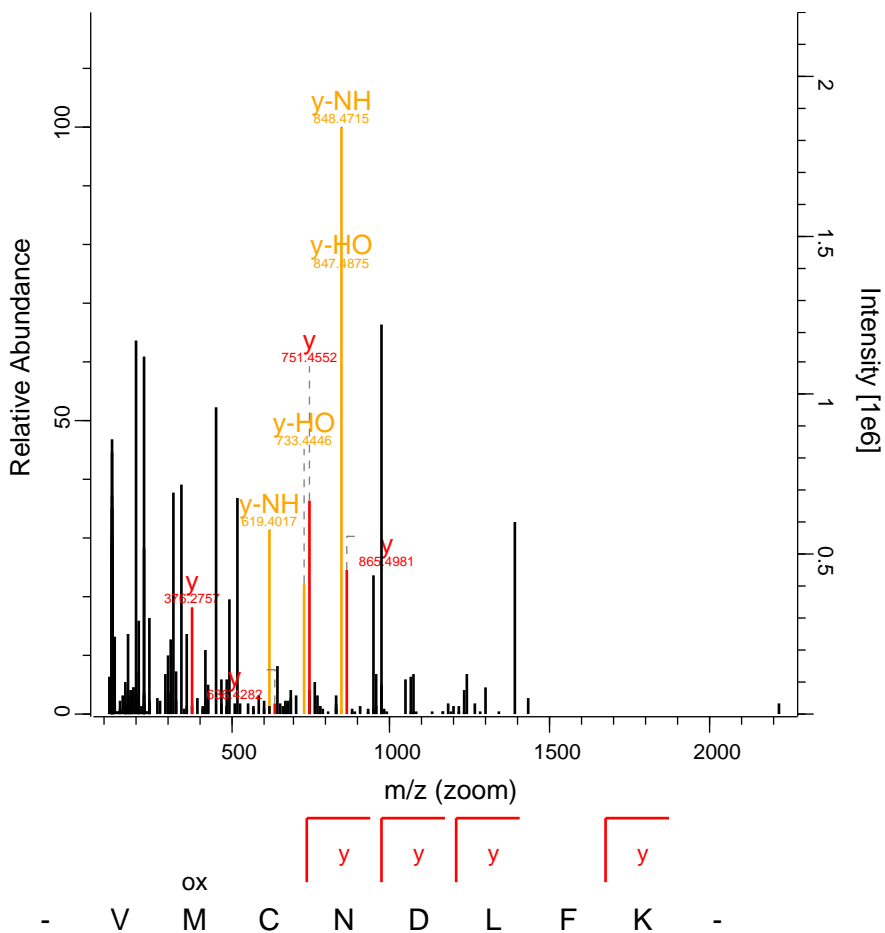



RO-QC-160121\_ZackD\_SS\_Set\_02\_Fractio 22312 FTMS; HC 125.04 600.86 TMEM167A

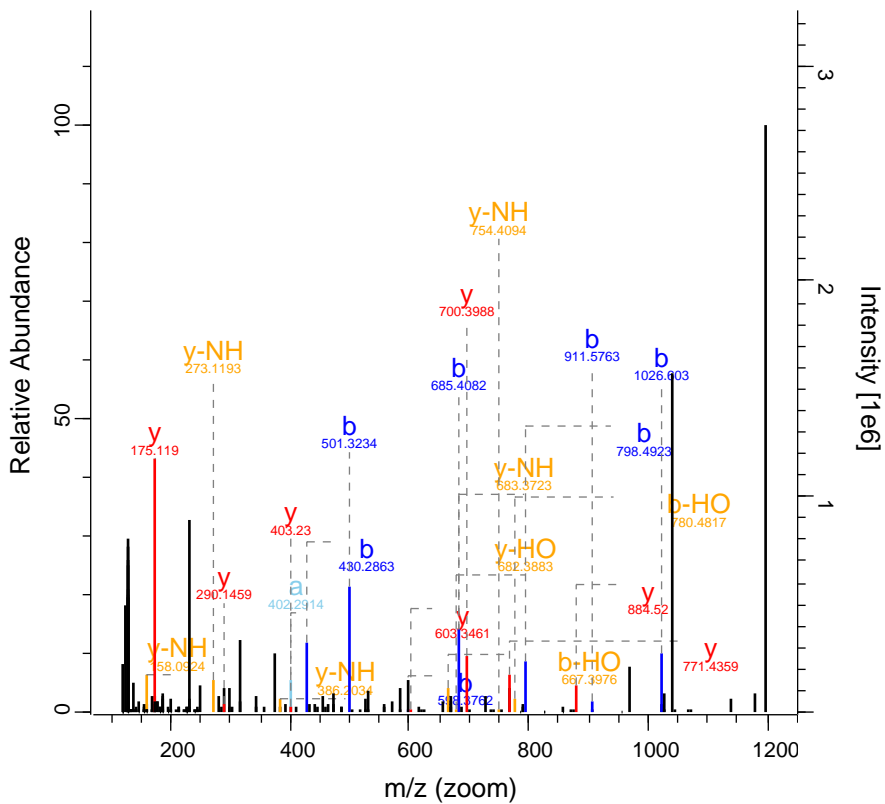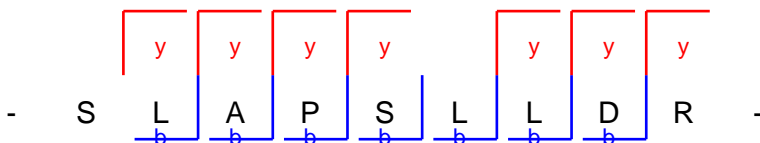

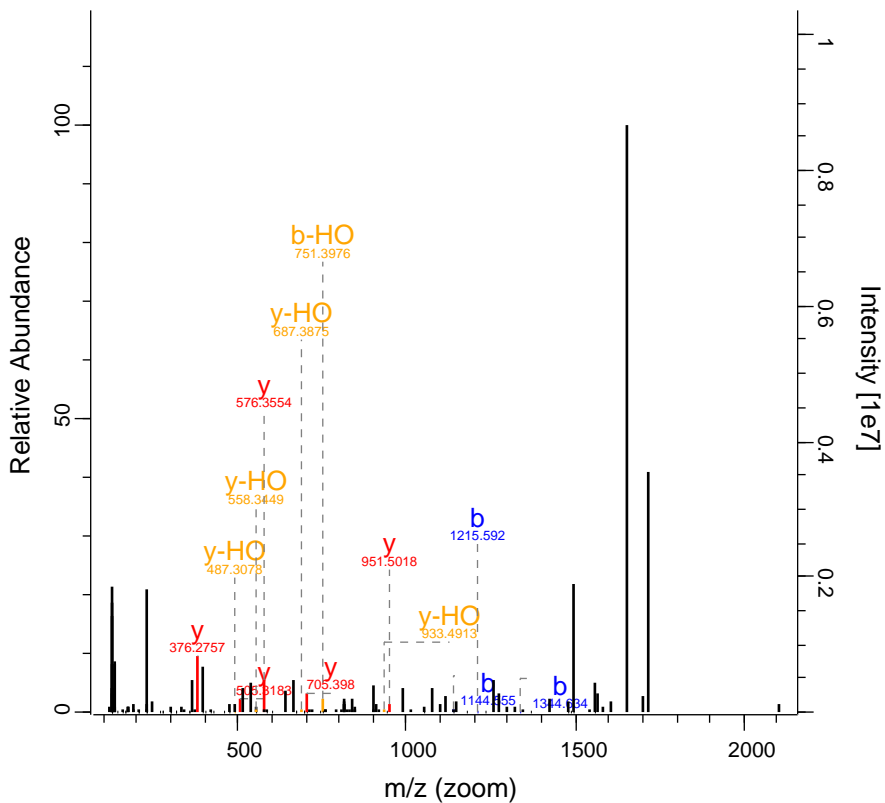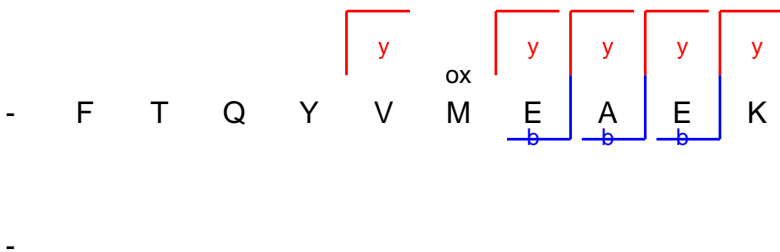

RO-QC-160121\_ZackD\_SS\_Set\_02\_Fractio 22880 FTMS; HC 149.72 722.45 ARL4C

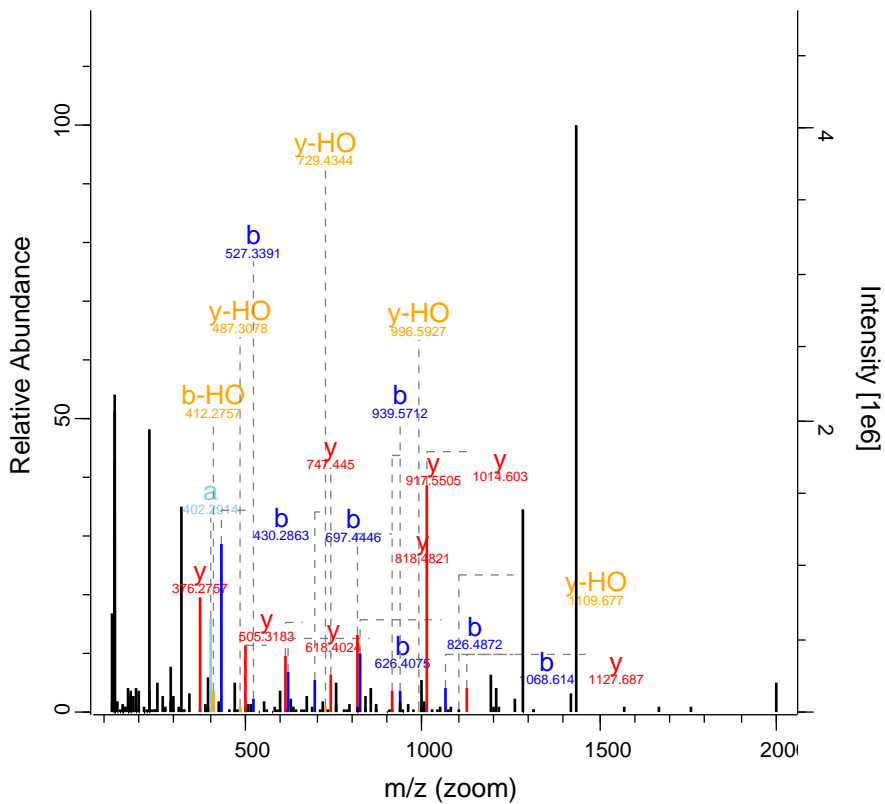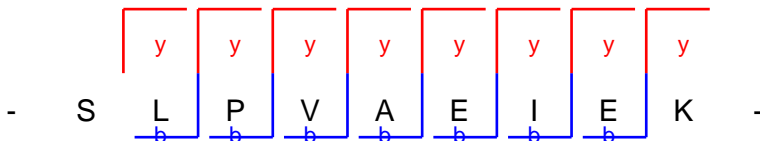



RO-QC-160121\_ZackD\_SS\_Set\_02\_Fractic 23640 FTMS; HC 189.09 1124.54 RHBDDB1

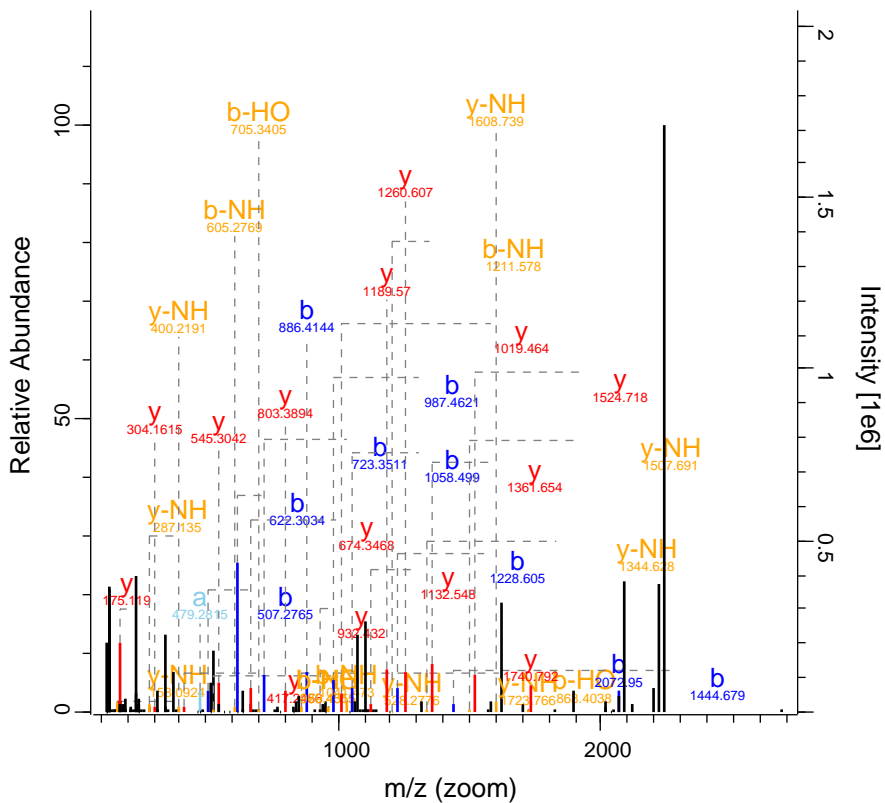

RO-QC-160121\_ZackD\_SS\_Set\_02\_Fraction 24147 FTMS; HCl 63.13 799.1 FAM103A1

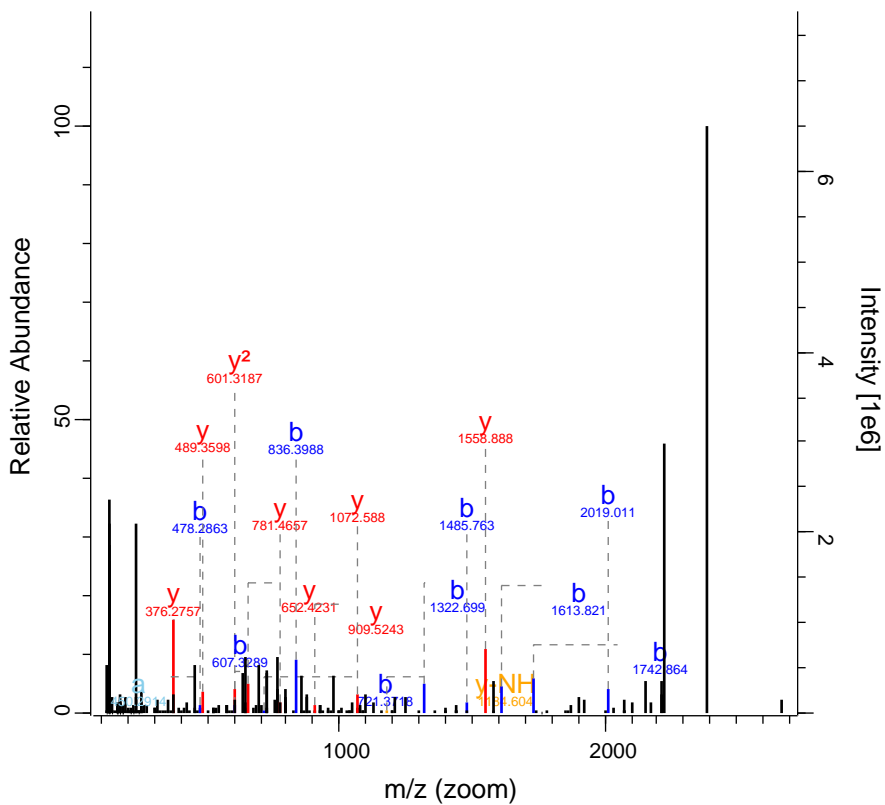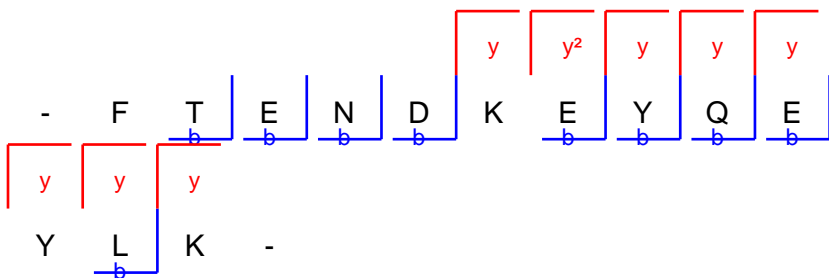

RO-QC-160121\_ZackD\_SS\_Set\_02\_Fraction 25039 FTMS; HC 61.84 717.43 AIM2

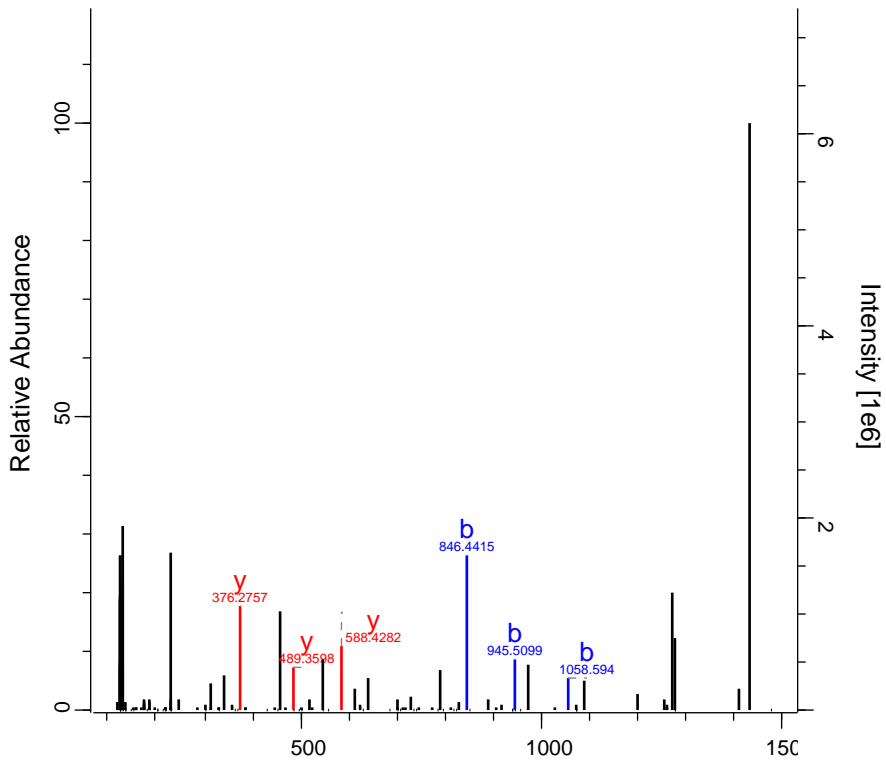

m/z (zoom)

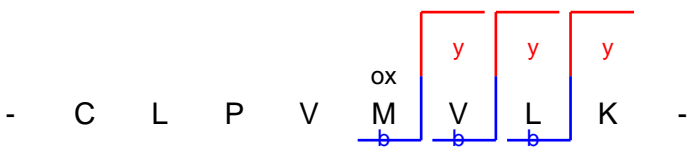

RO-QC-160121\_ZackD\_SS\_Set\_02\_Fractio 25898 FTMS; HC 178.07 801.47 RASSF3

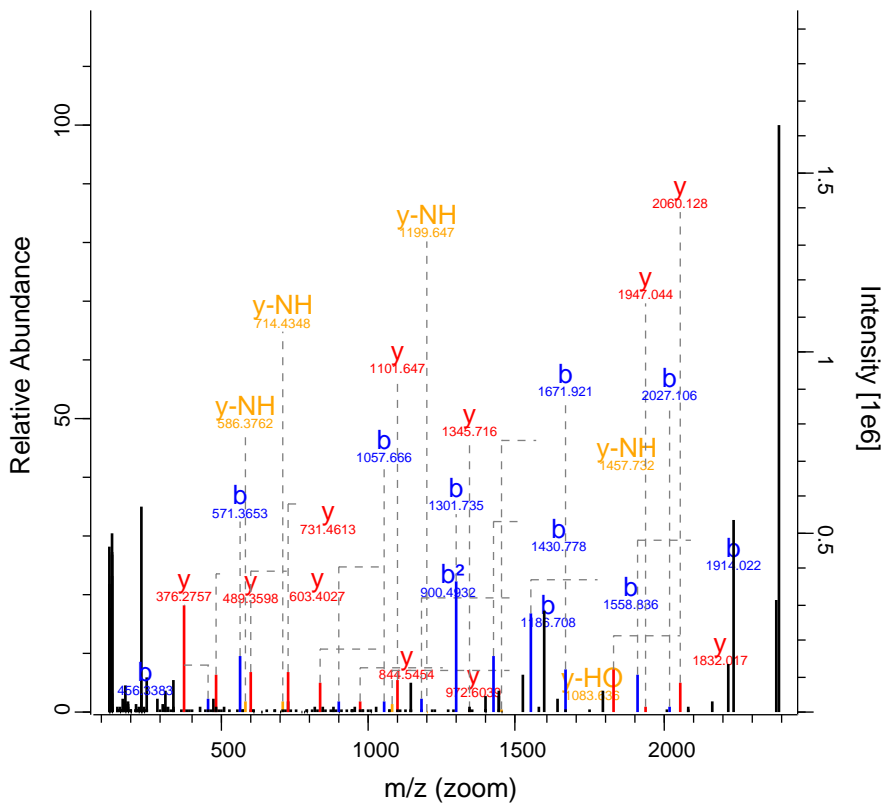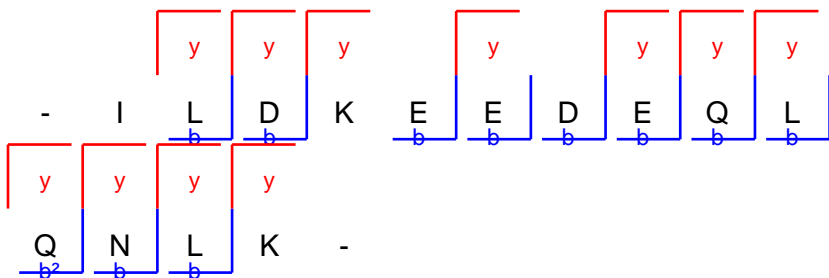



RO-QC-160121\_ZackD\_SS\_Set\_02\_Fraction 26455 FTMS; HC 48.82 847.41 CNIH4

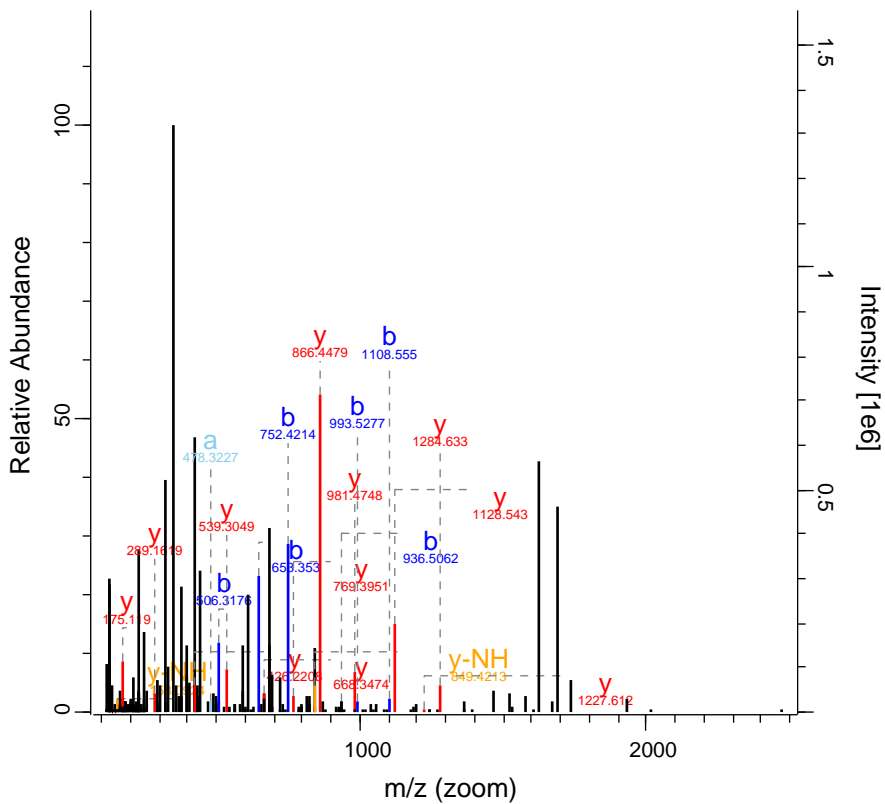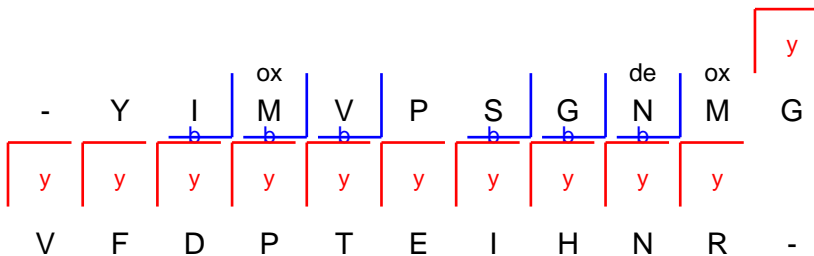

RO-QC-160121\_ZackD\_SS\_Set\_02\_Fractio 26560 FTMS; HC 113.77 494.29 GATC

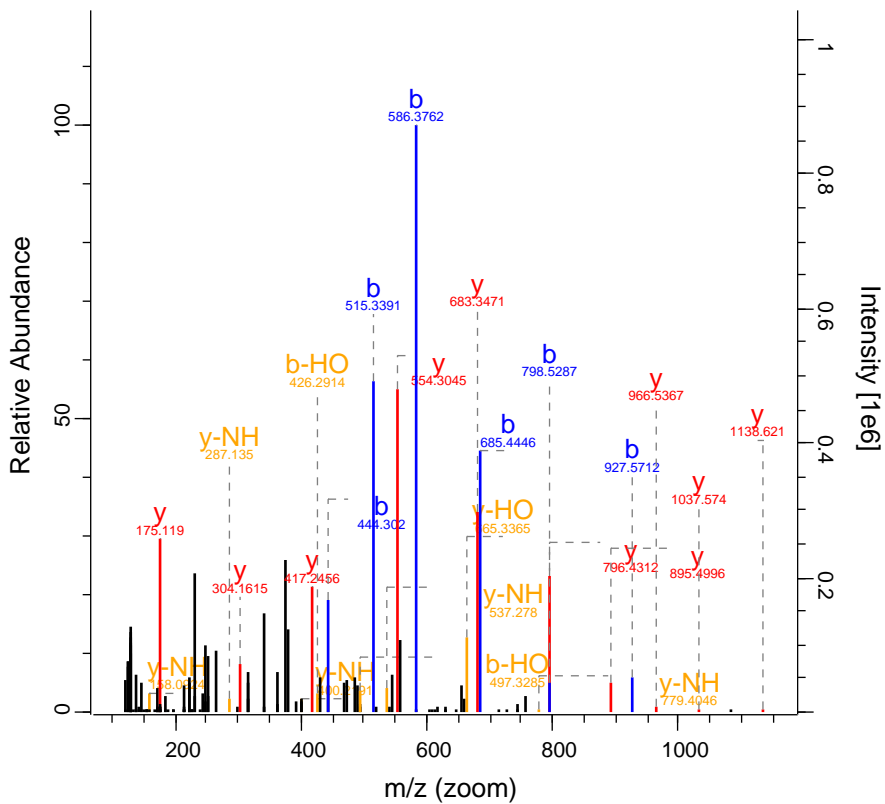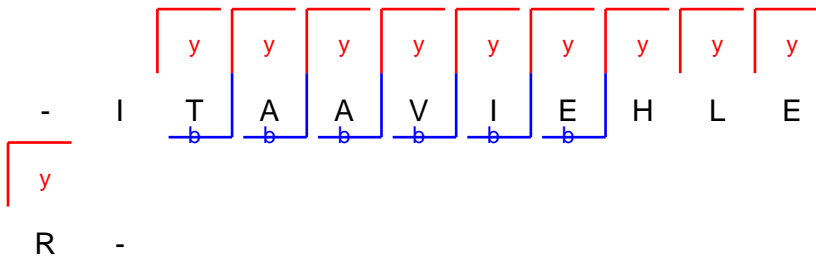

RO-QC-160121\_ZackD\_SS\_Set\_02\_Fraction 26816 FTMS; HC 51.01 594.99 IFI44

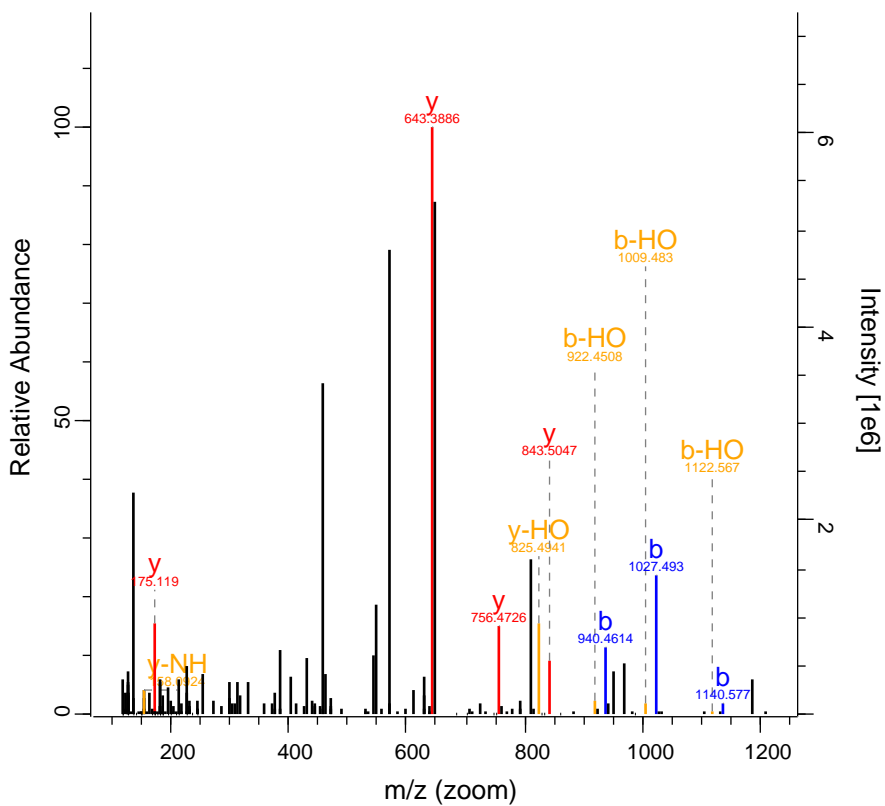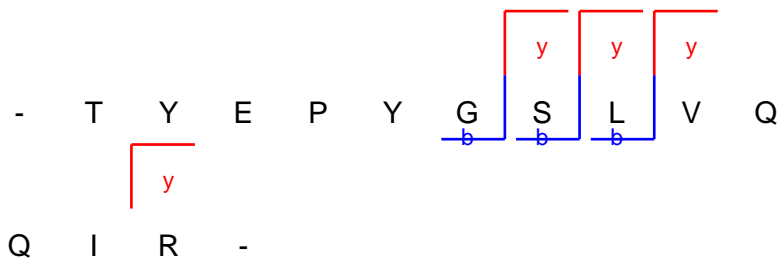

RO-QC-160121\_ZackD\_SS\_Set\_02\_Fraction27021 FTMS; HC 44.62 594.99 IFI44

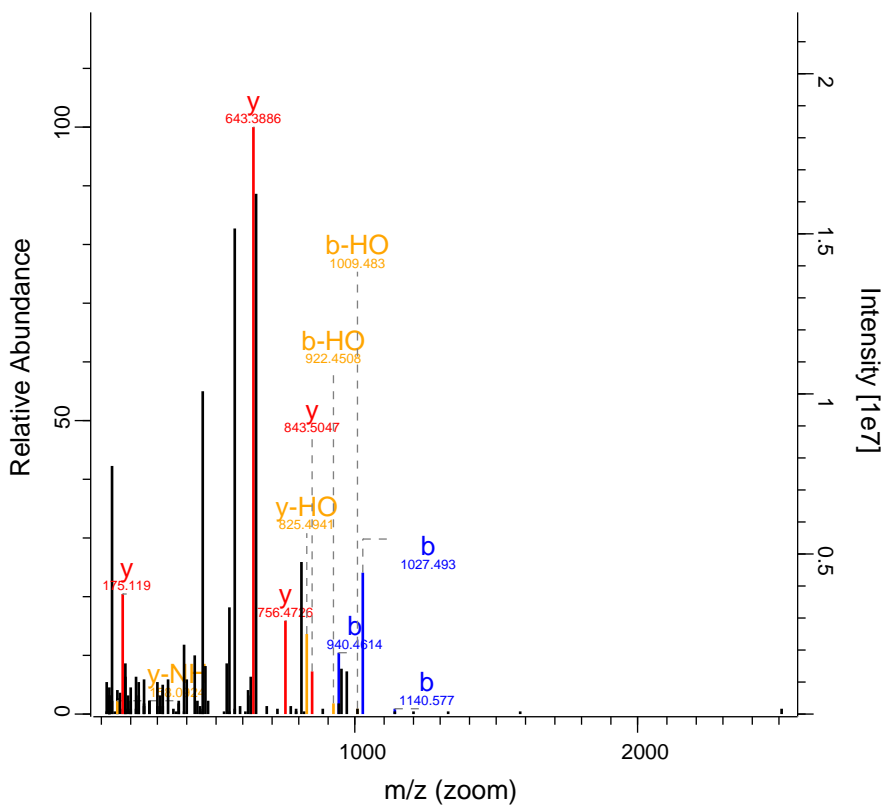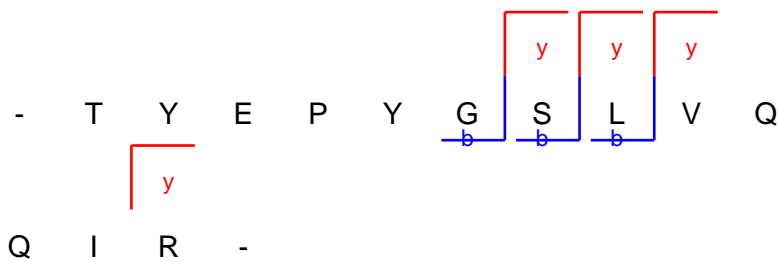

RO-QC-160121\_ZackD\_SS\_Set\_02\_Fractio 27706 FTMS; HC 107.21 644.38 DNLZ

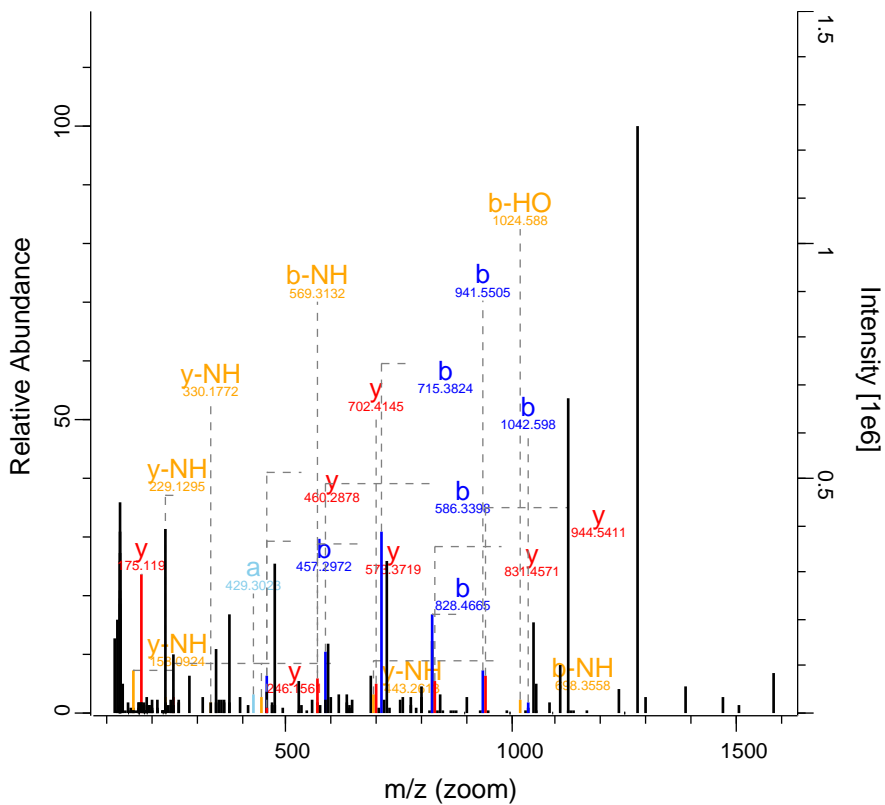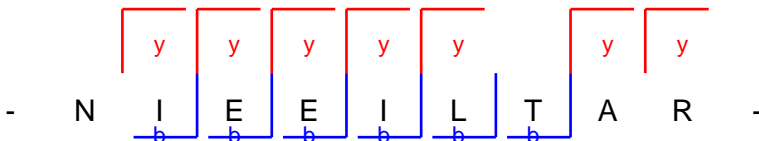

RO-QC-160121\_ZackD\_SS\_Set\_02\_Fratio27738 FTMS; HC 159.74 983.52 C1GALT1C1

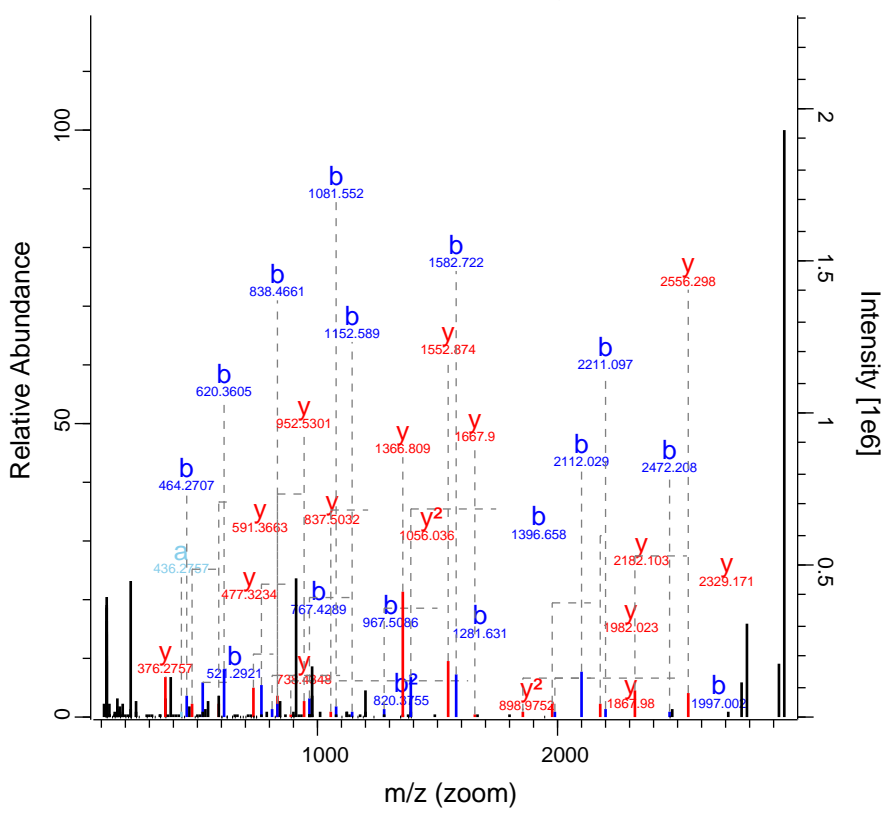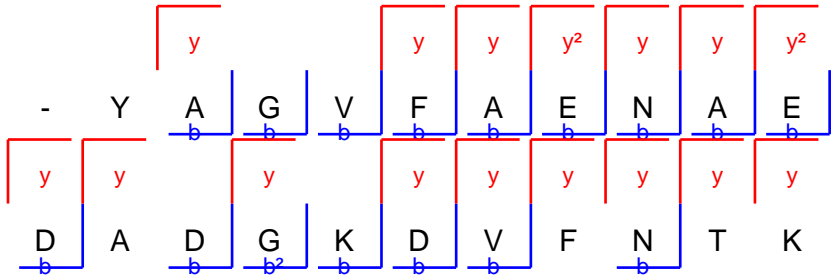

RO-QC-160121\_ZackD\_SS\_Set\_02\_Fratio 27753 FTMS; HC 135.73 738.14 C1GALT1C1

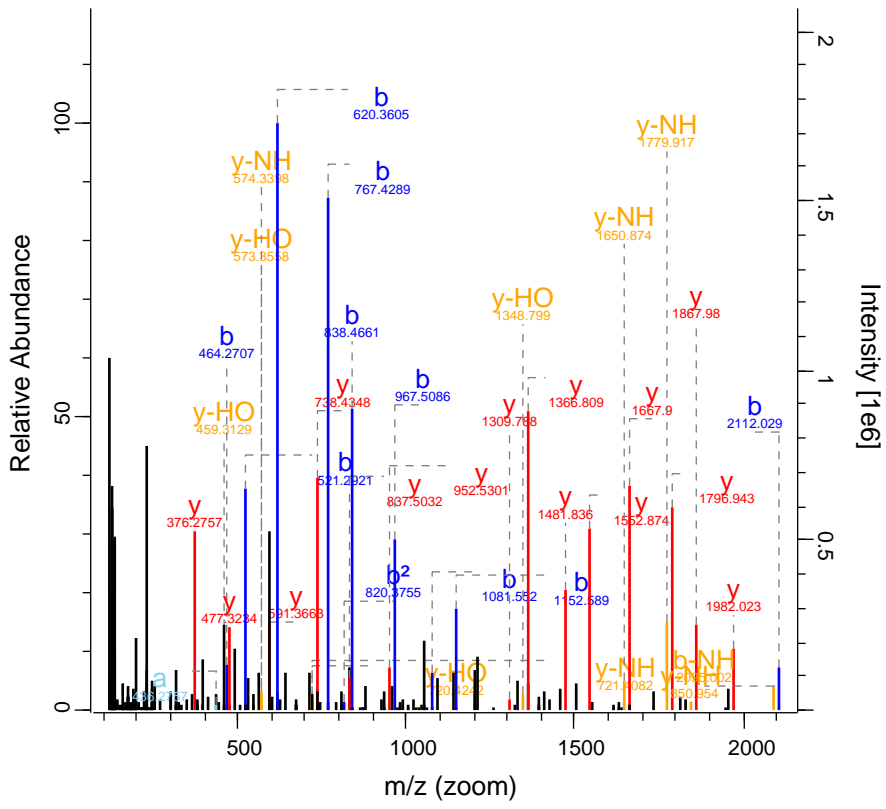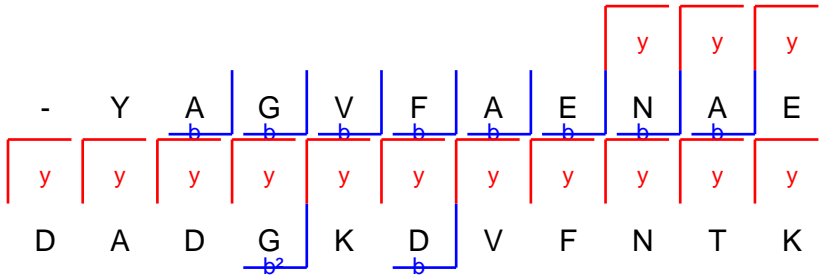

RO-QC-160121\_ZackD\_SS\_Set\_02\_Fraction 28259 FTMS; HC 26.15 666.05 B3GALNT1

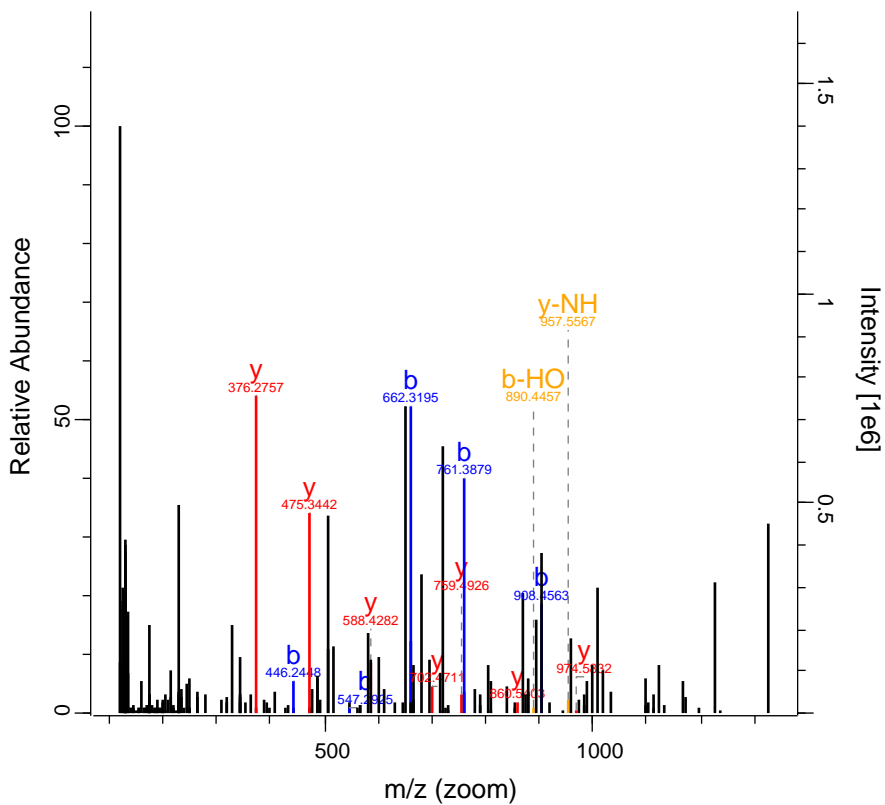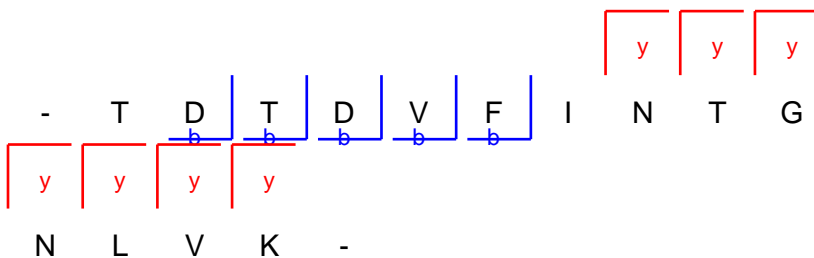



RO-QC-160121\_ZackD\_SS\_Set\_02\_Fraction 28419 FTMS; HC 85.29 884.47 USP21

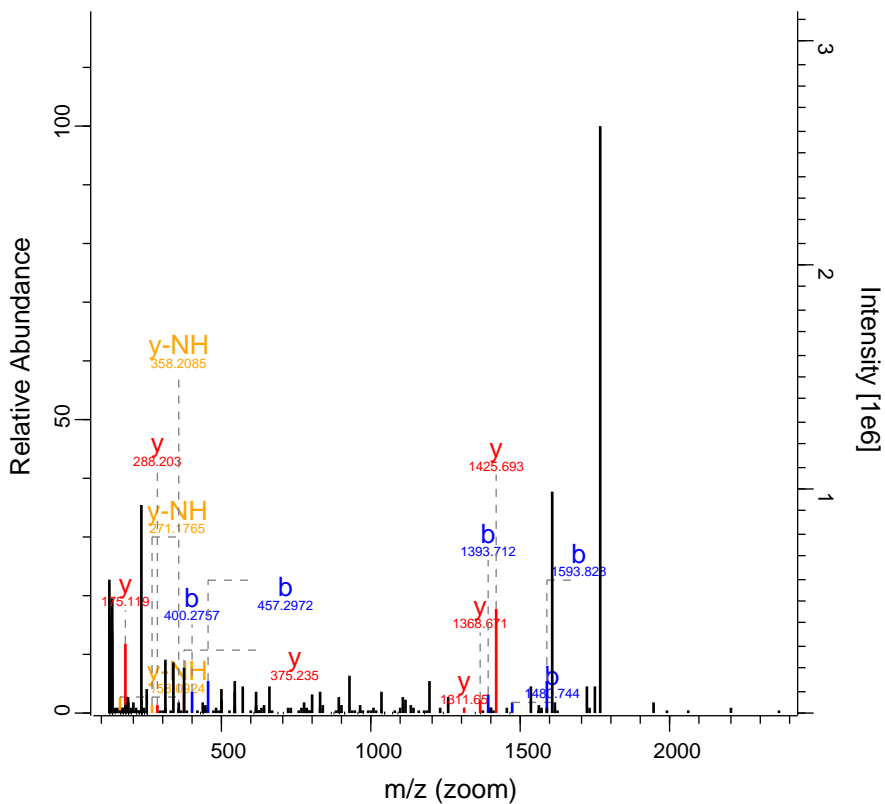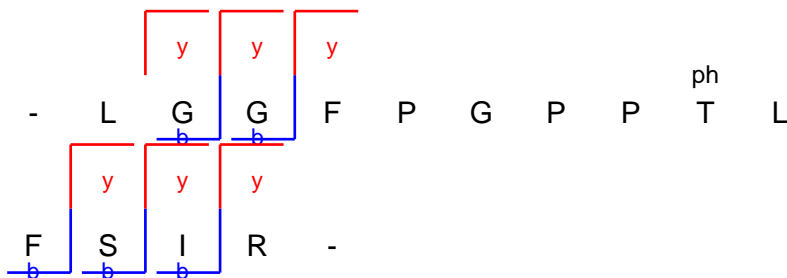

| Raw File                                | Scan  | Method    | Score | m/z    |
|-----------------------------------------|-------|-----------|-------|--------|
| RO-QC-160121_ZackD_SS_Set_02_Fraction_5 | 28424 | FTMS; HCD | 61.68 | 459.23 |

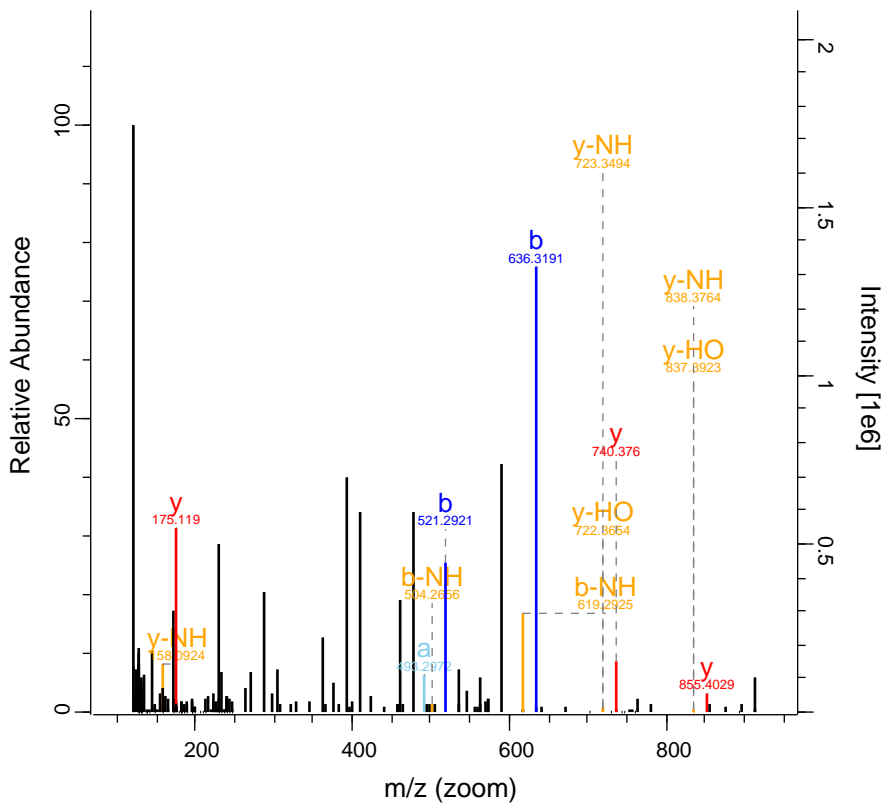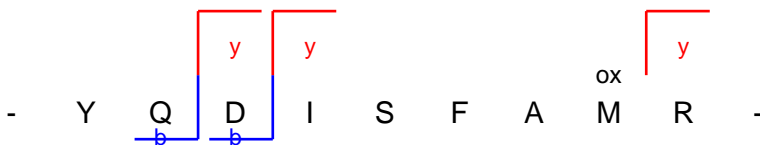

Raw File

Scan Method Score m/z

RO-QC-160121\_ZackD\_SS\_Set\_02\_Fraction\_5

28465 FTMS; HCD 62.46 688.35

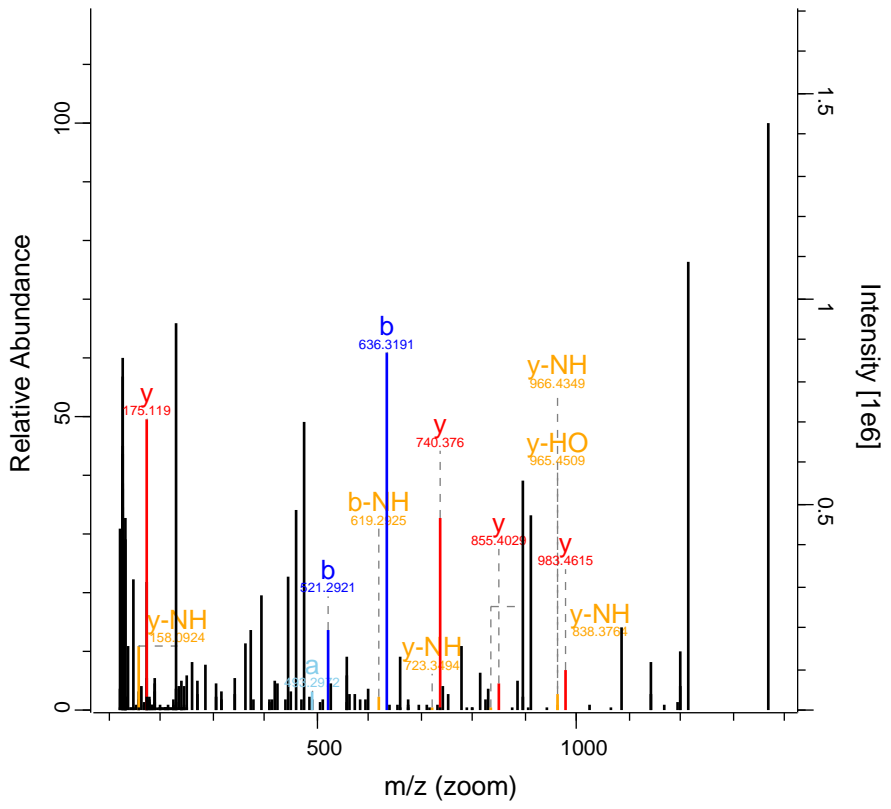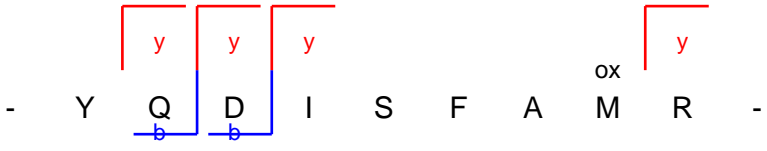

RO-QC-160121\_ZackD\_SS\_Set\_02\_Fraction 29061 FTMS; HCl 84.72 612.7 RAB20

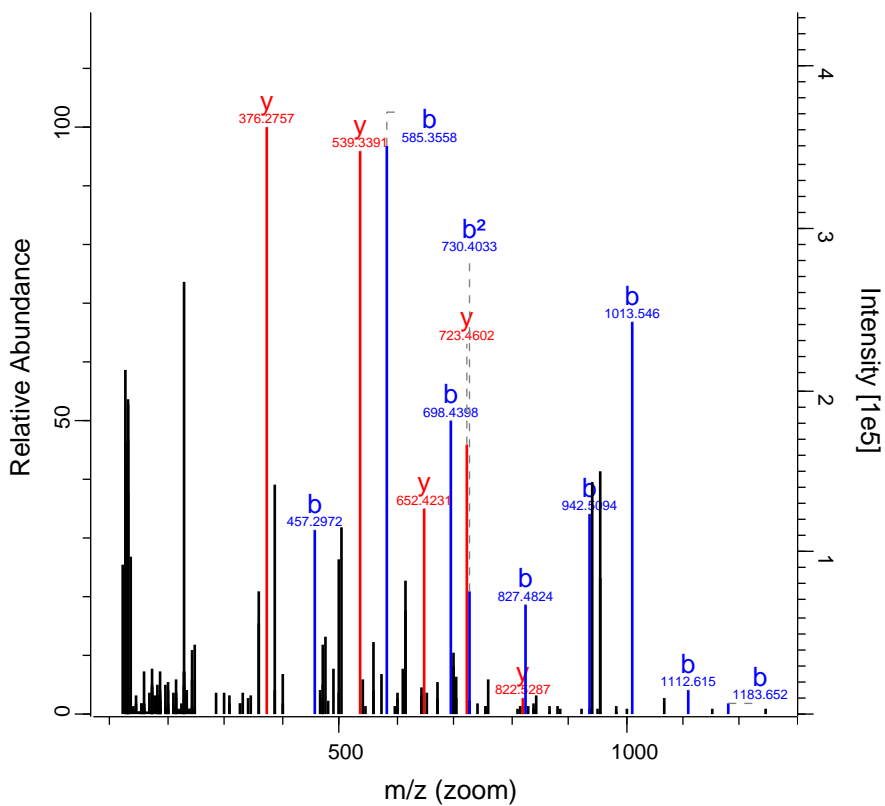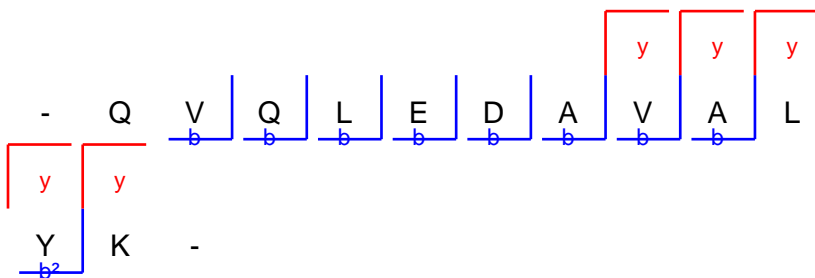

RO-QC-160121\_ZackD\_SS\_Set\_02\_Fraction 29800 FTMS; HC 84.17 901.54 FAM184B

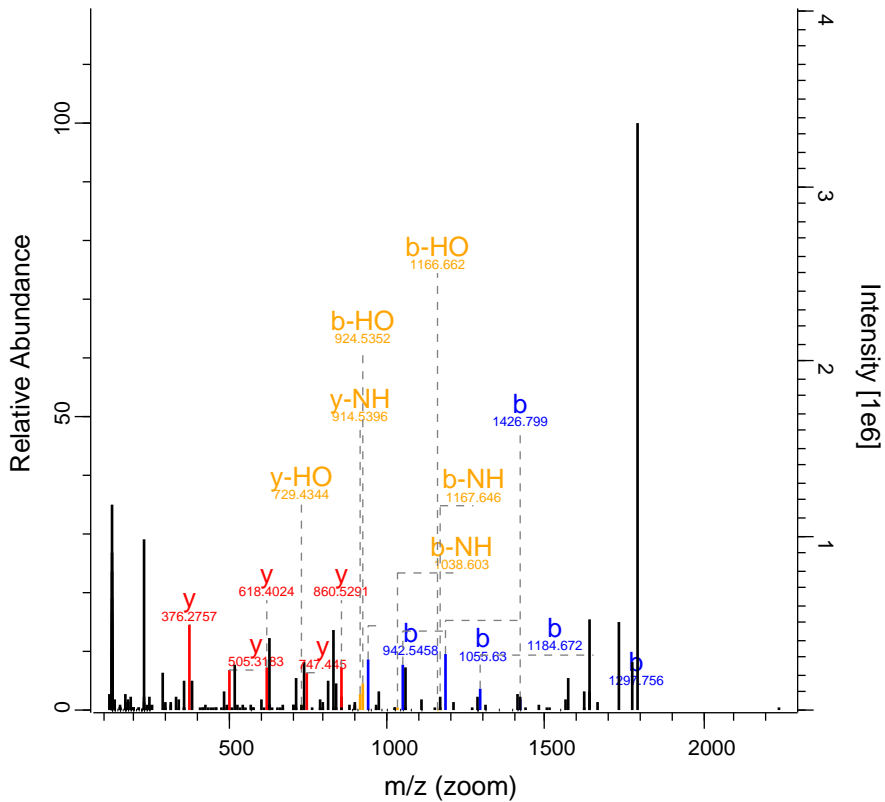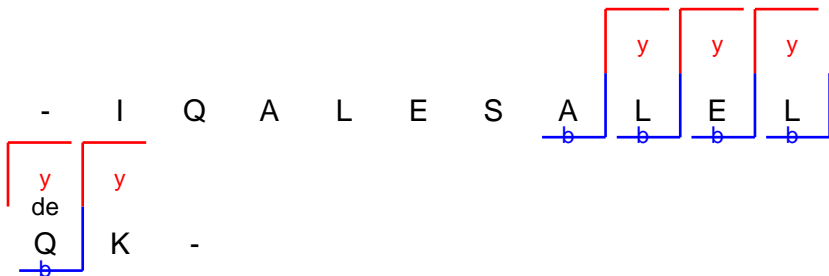

RO-QC-160121\_ZackD\_SS\_Set\_02\_Fraction 30642 FTMS; HC 60.44 963.54 OR7A10

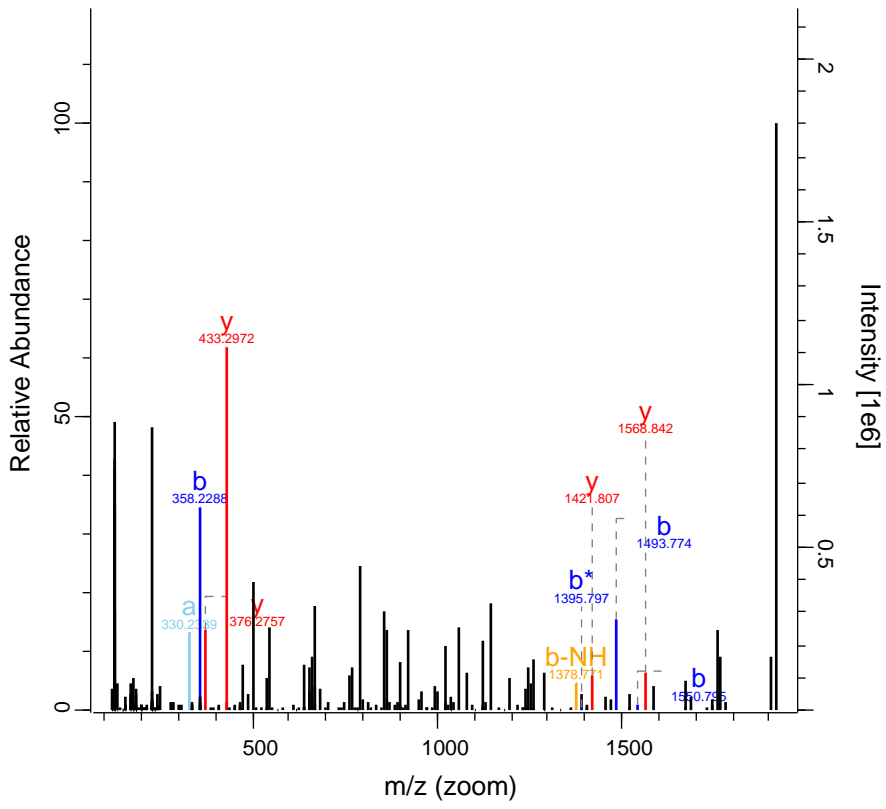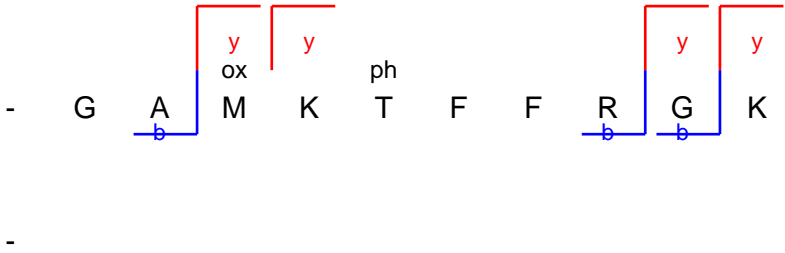

RO-QC-160121\_ZackD\_SS\_Set\_02\_Fractic 31004 FTMS; HC 61.65 1160.56 SGOL2

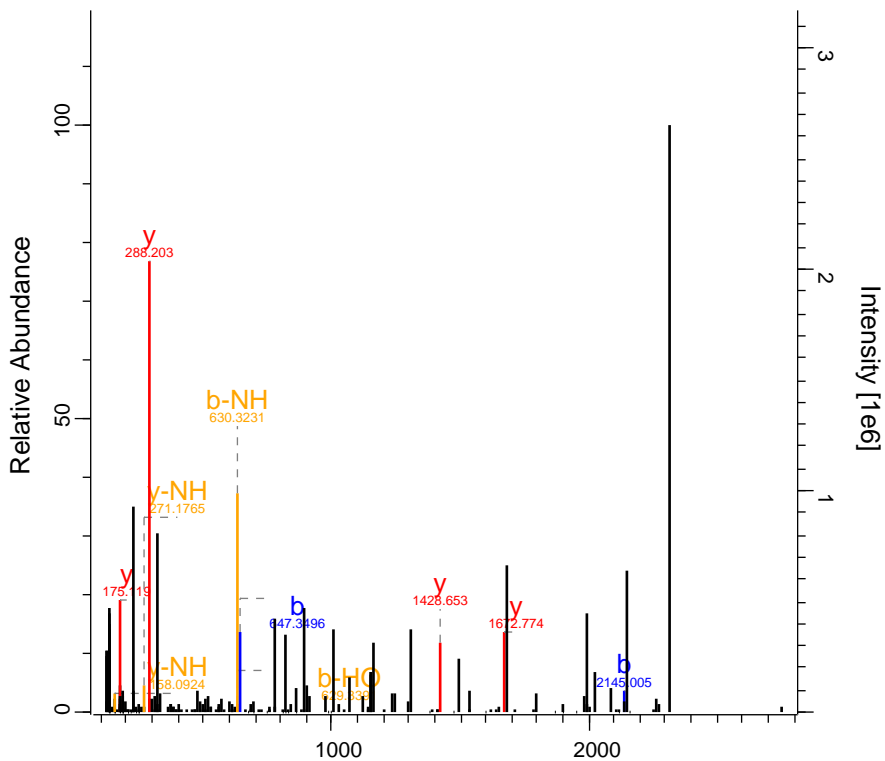

m/z (zoom)

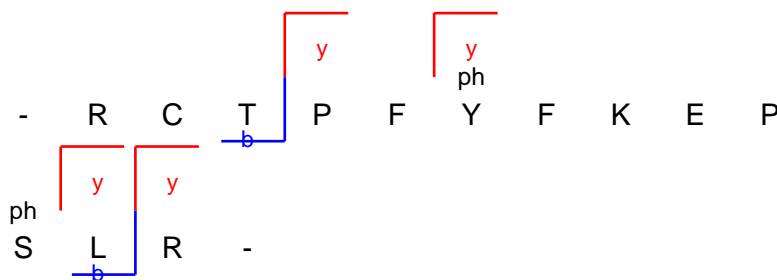

RO-QC-160121\_ZackD\_SS\_Set\_02\_Fractio 31125 FTMS; HC 138.66 782.95 PUS10

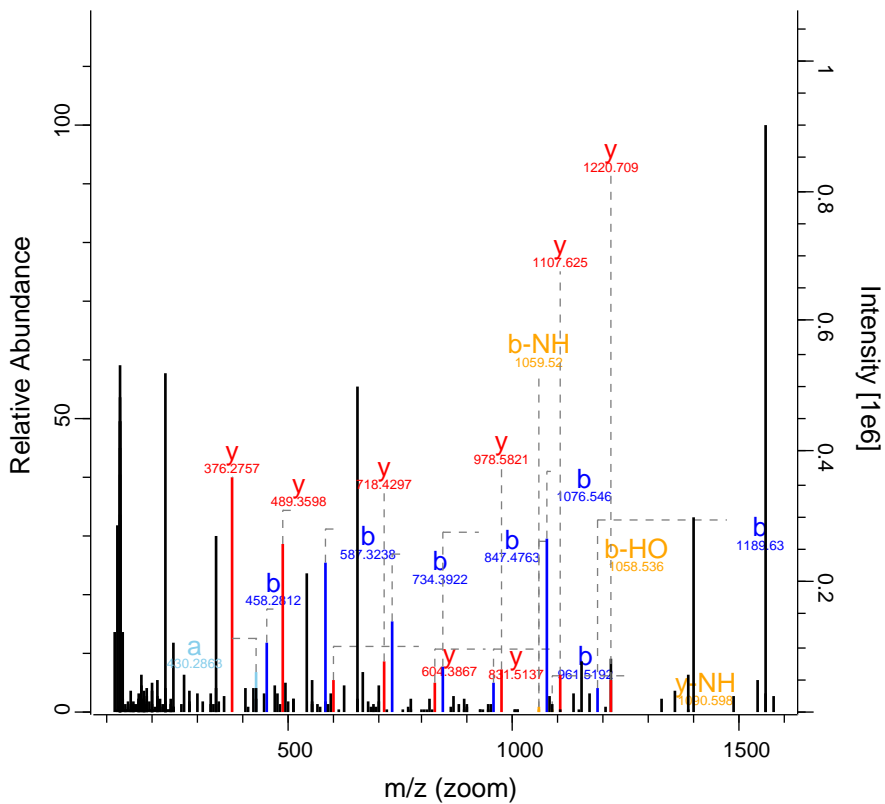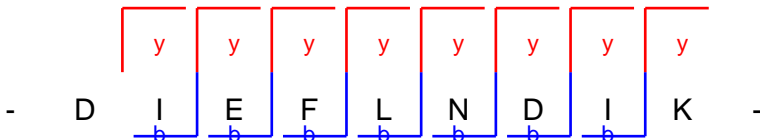



RO-QC-160121\_ZackD\_SS\_Set\_02\_Fraction 31187 FTMS; HC 87.09 717.05 GPT2;GPT

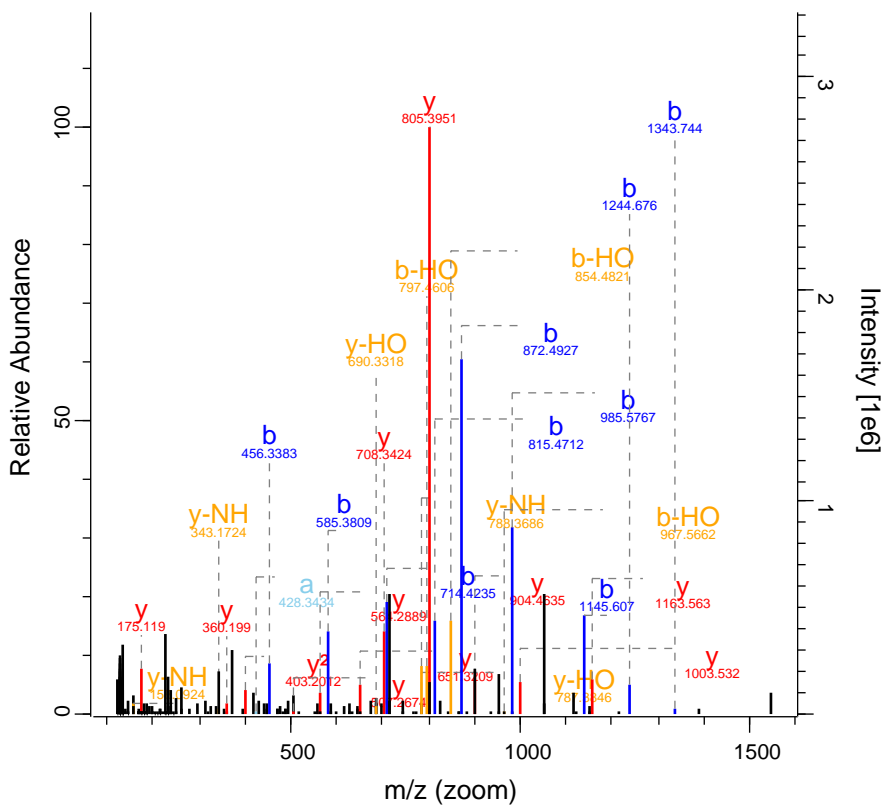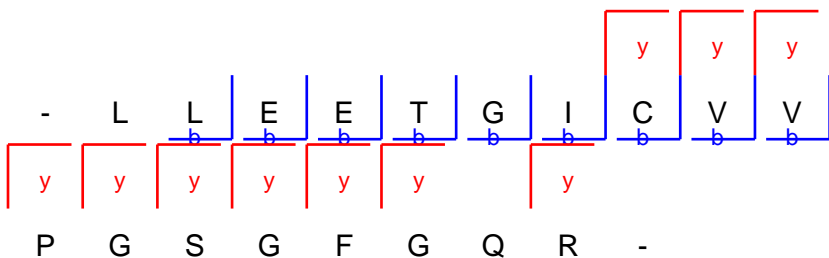

RO-QC-160121\_ZackD\_SS\_Set\_02\_Fractio 31218 FTMS; HC 131.22 660.89 FAM96A

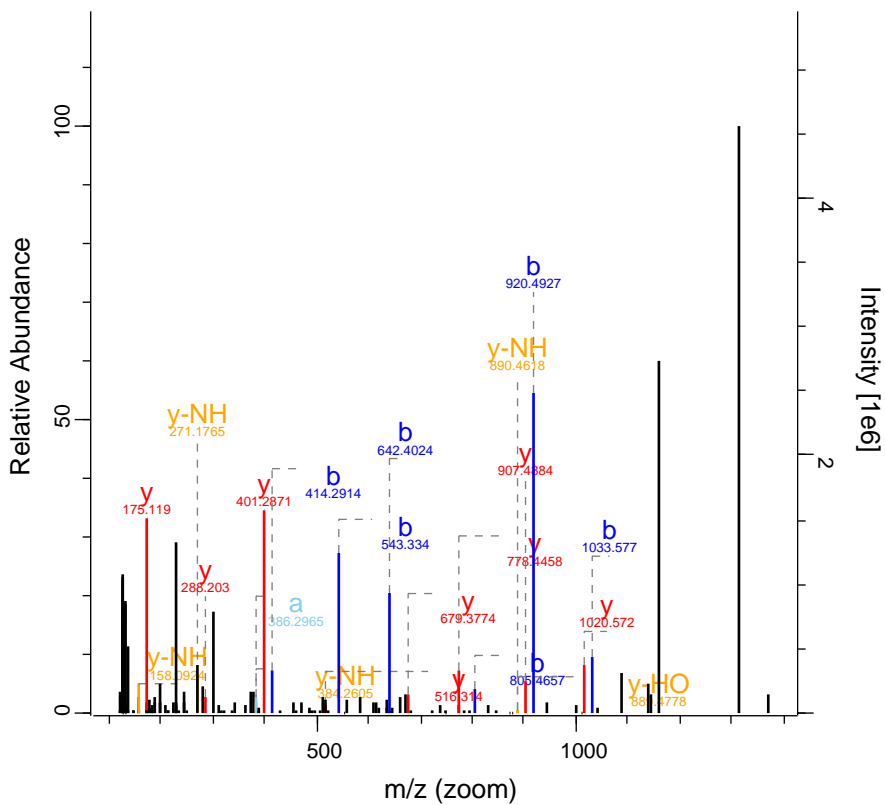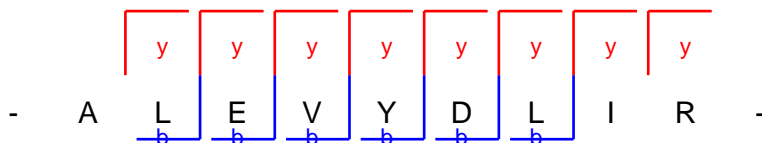

RO-QC-160121\_ZackD\_SS\_Set\_02\_Fractic 31239 FTMS; HC 176.91 1075.07 GPT2;GPT

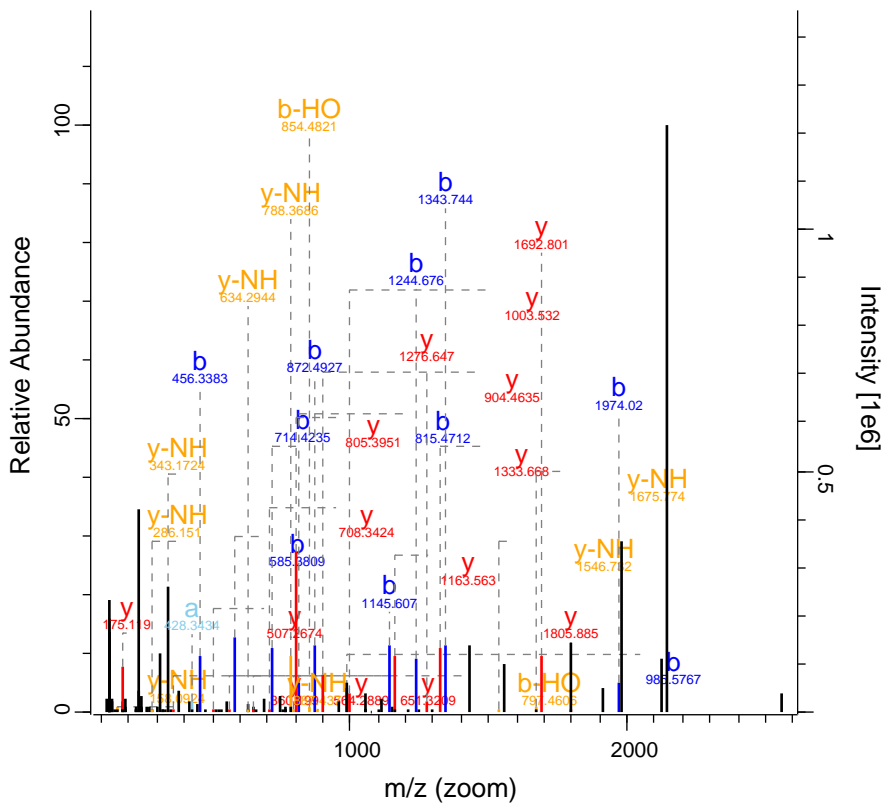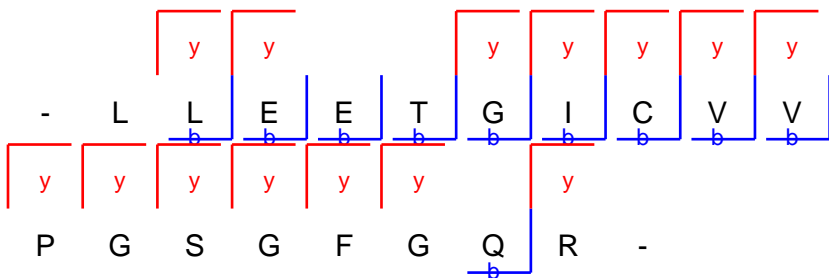

RO-QC-160121\_ZackD\_SS\_Set\_02\_Fraction 32105 FTMS; HC 72.94 657.37 CD96

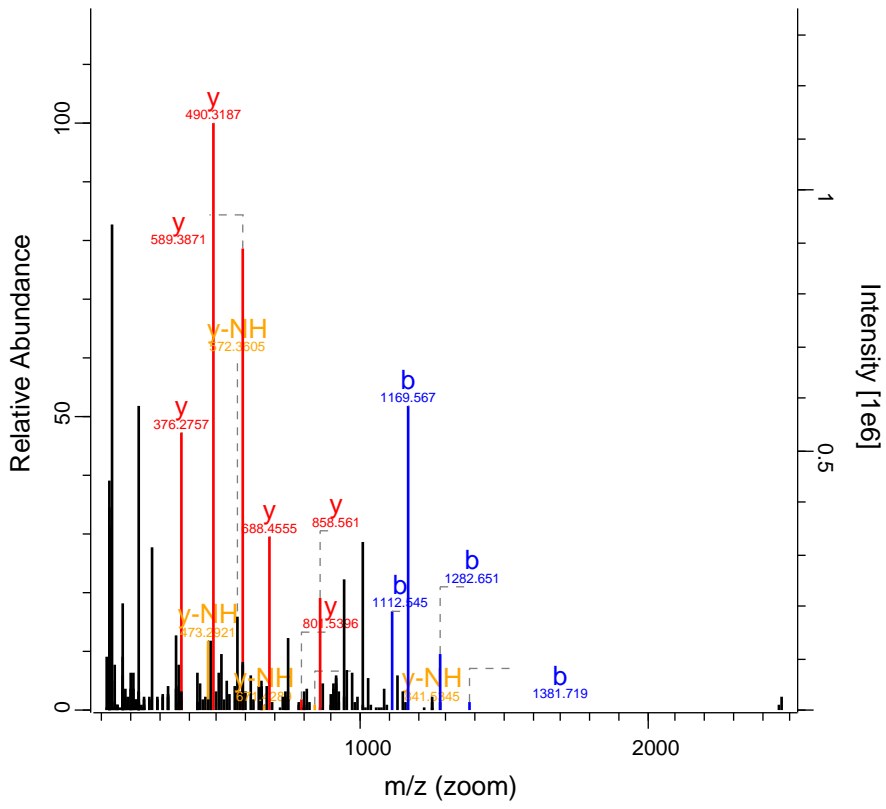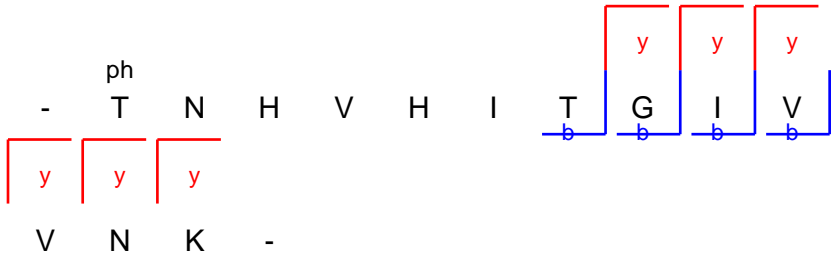

RO-QC-160121\_ZackD\_SS\_Set\_02\_Fraction 32129 FTMS; HCl 117.02 731.9 PEX7

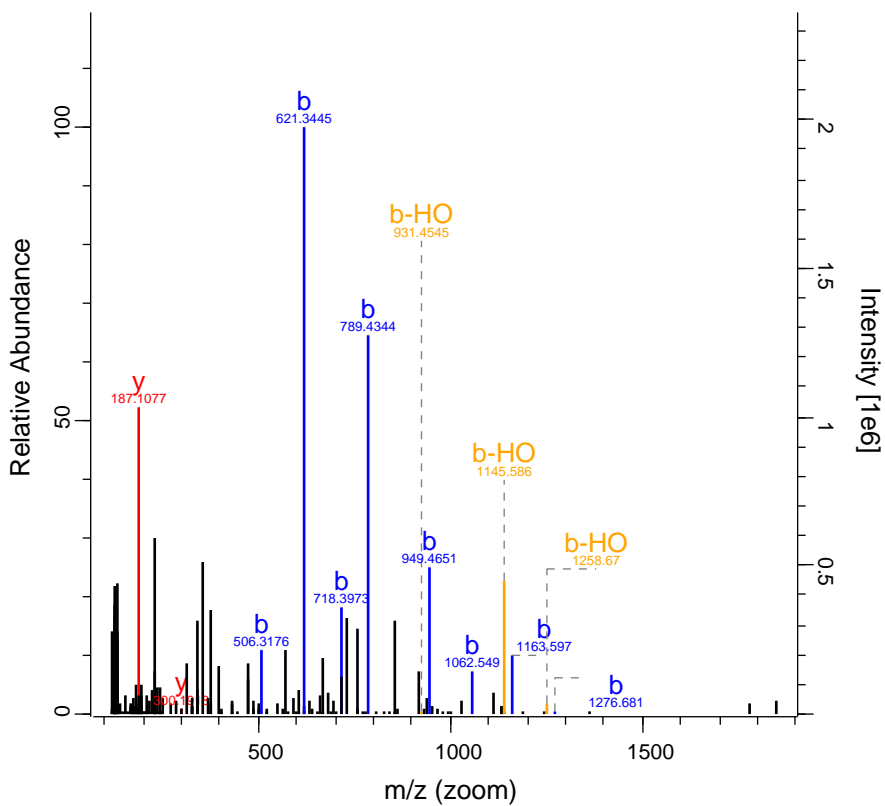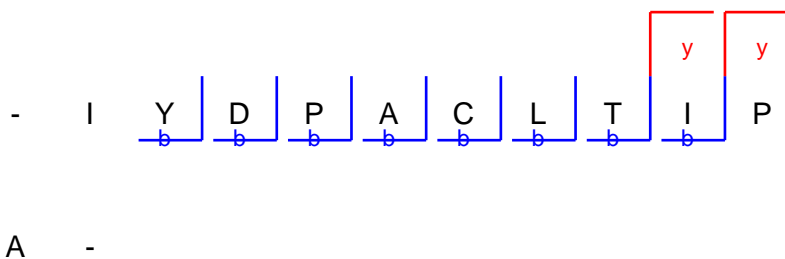

RO-QC-160121\_ZackD\_SS\_Set\_02\_Fractio 33559 FTMS; HC 120.29 770.75 DNASE1L1

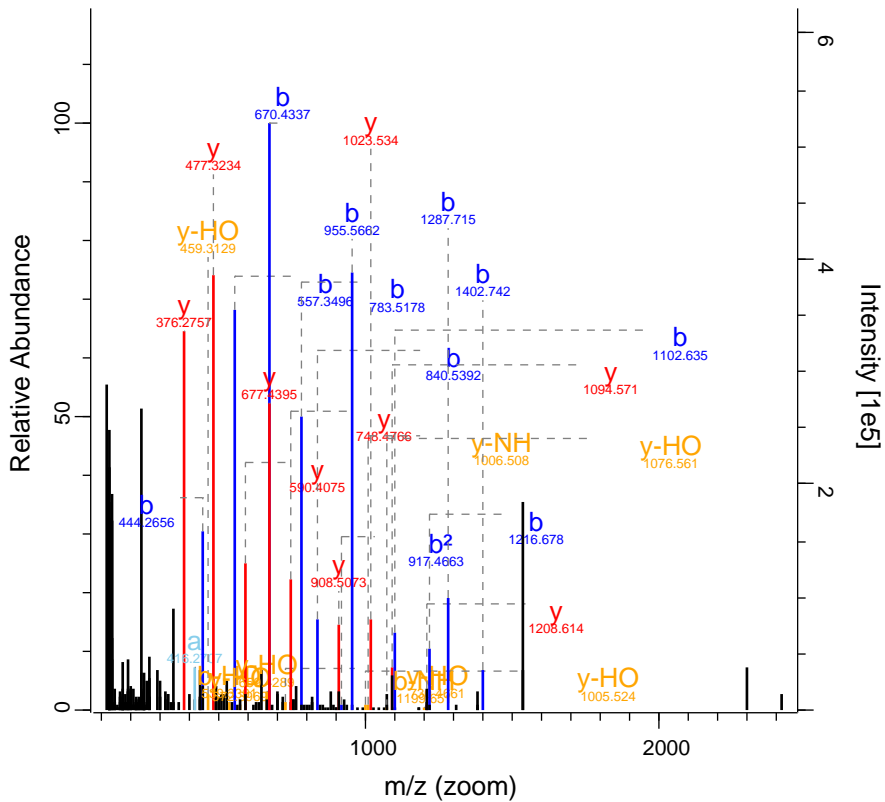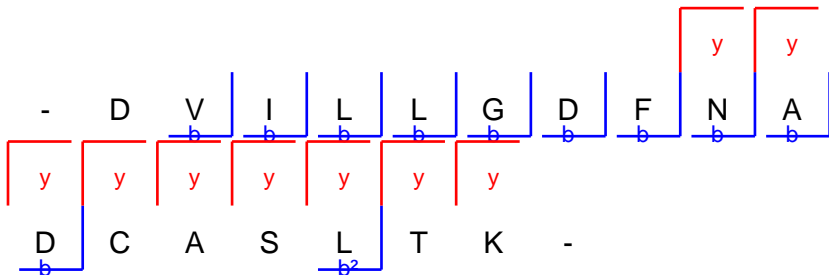

RO-QC-160121\_ZackD\_SS\_Set\_02\_Fraction 34258 FTMS; HC 73.21 895.03 PPEF1

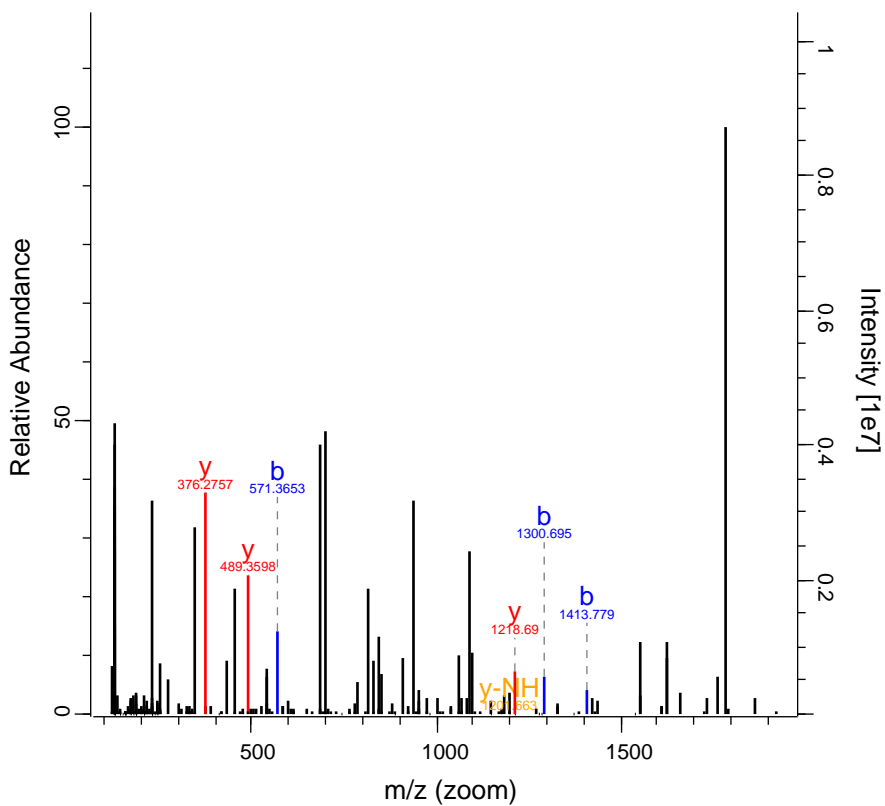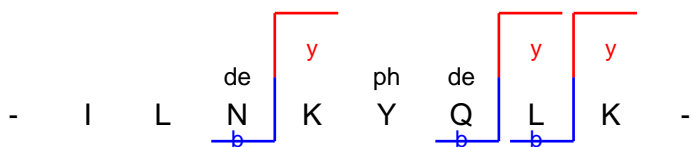





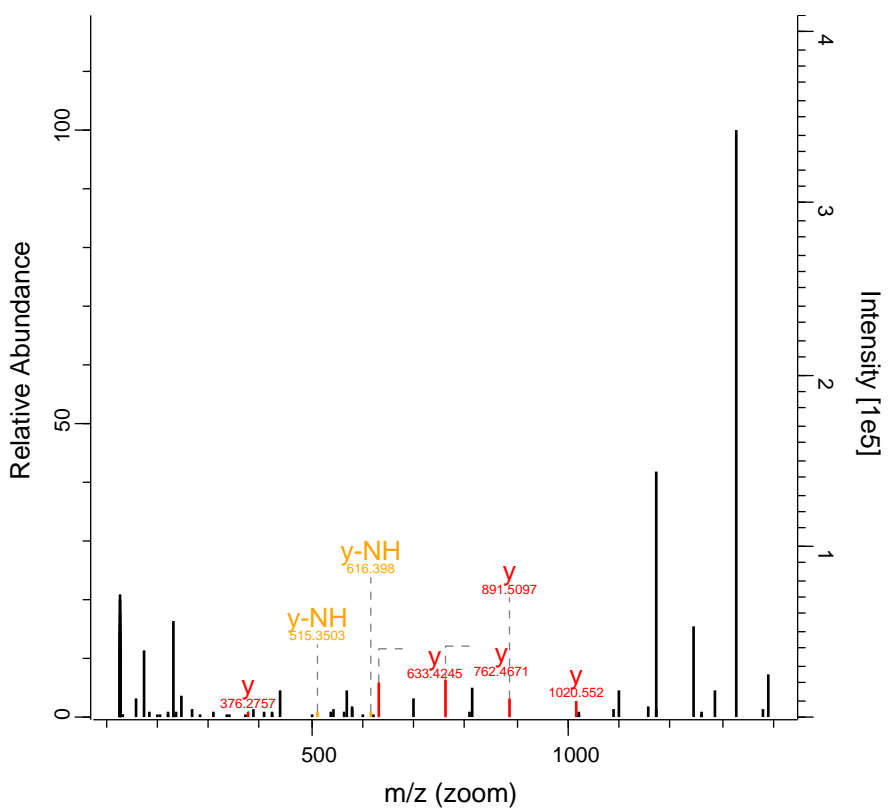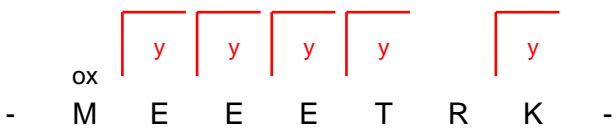

RO-QC-160121\_ZackD\_SS\_Set\_02\_Fraction 4392 FTMS; HCl 88.58 507.95 METTL25

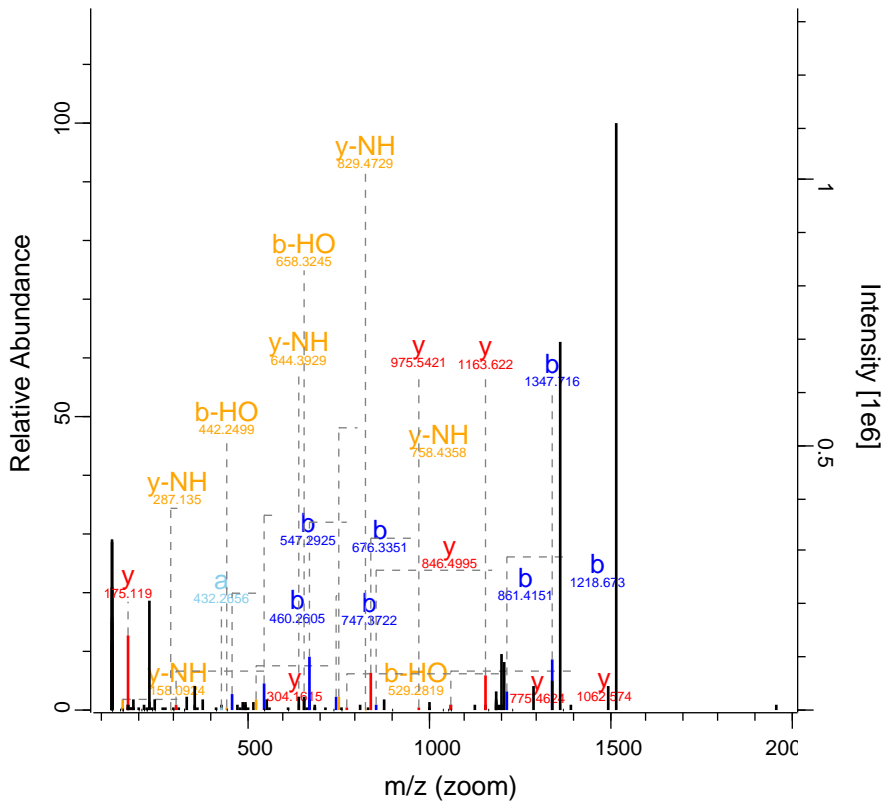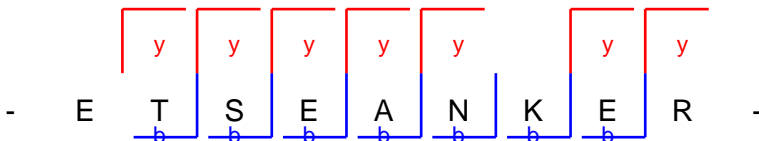

RO-QC-160121\_ZackD\_SS\_Set\_02\_Fraction 4460 FTMS; HCl 90.71 675.66 TRPM1

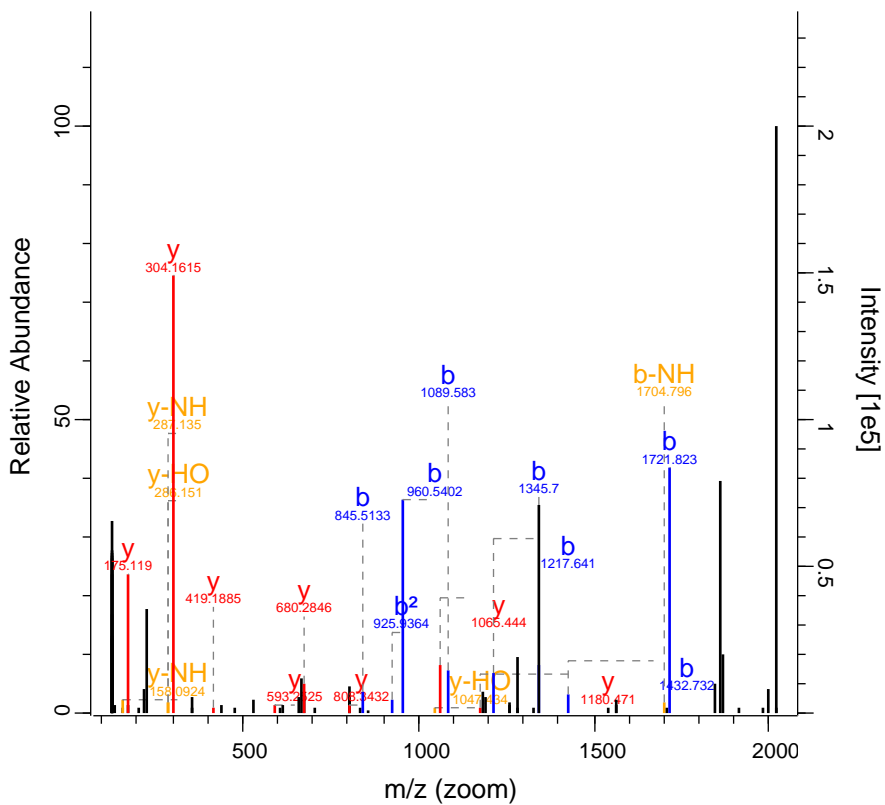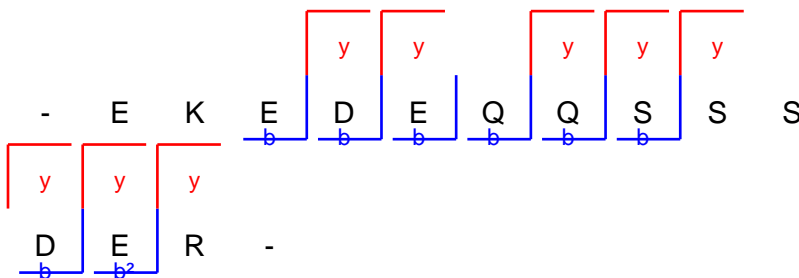

RO-QC-160121\_ZackD\_SS\_Set\_02\_Fraction 4866 FTMS; HCl 54.28 638.97 SUV420H1

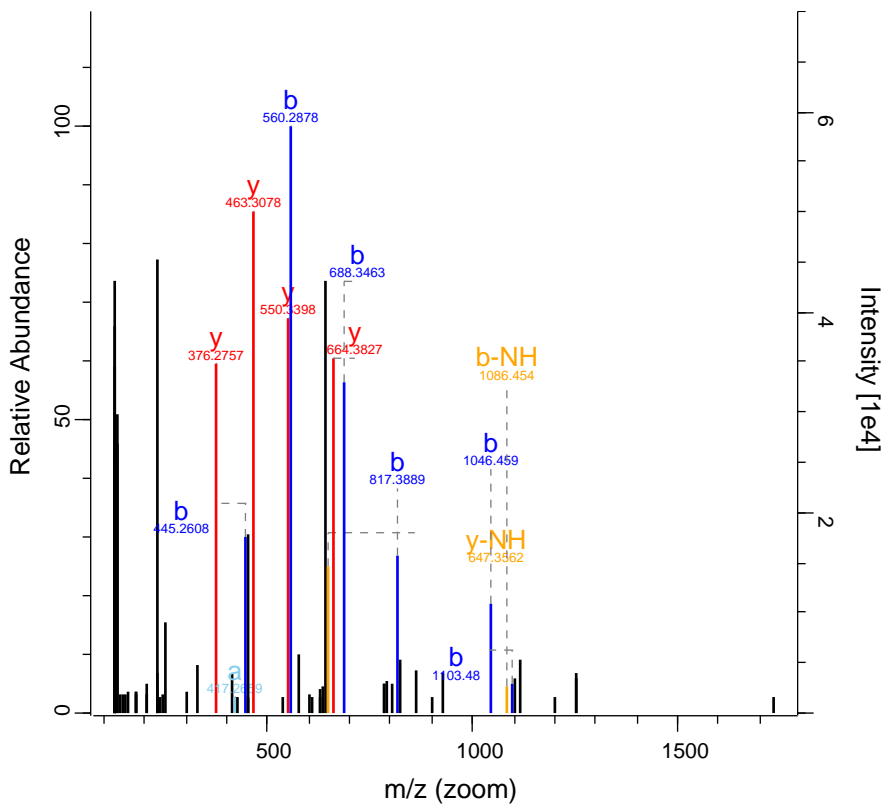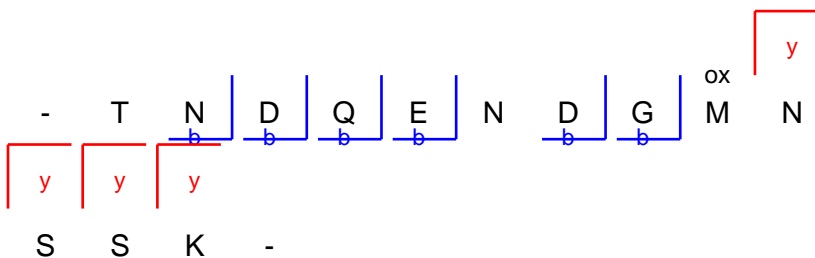

RO-QC-160121\_ZackD\_SS\_Set\_02\_Fraction 4879 FTMS; HCl 47.44 611.31 INPP5B

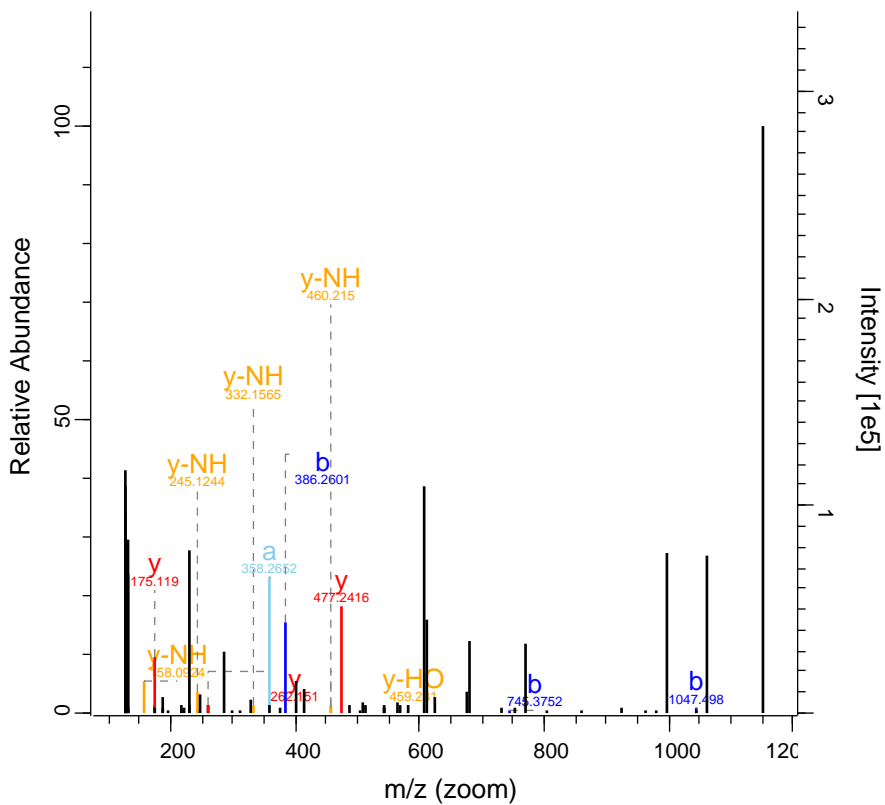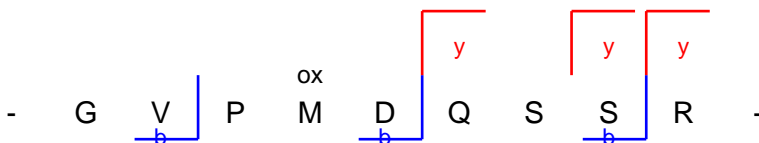

RO-QC-160121\_ZackD\_SS\_Set\_02\_Fraction 5209 FTMS; HCl 96.71 636.28 OLFML2A

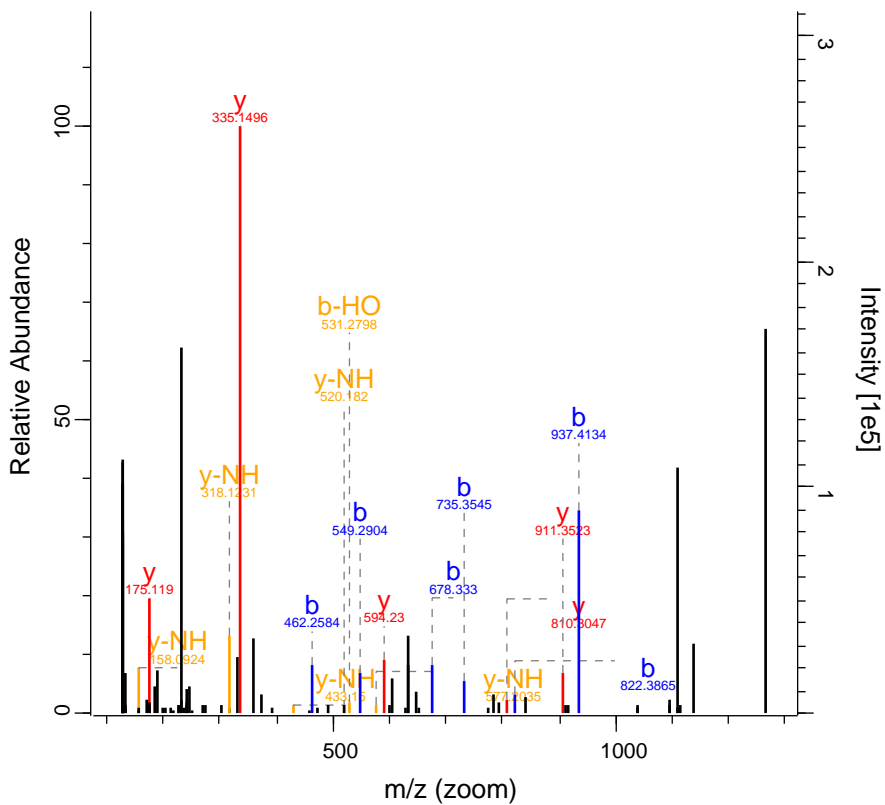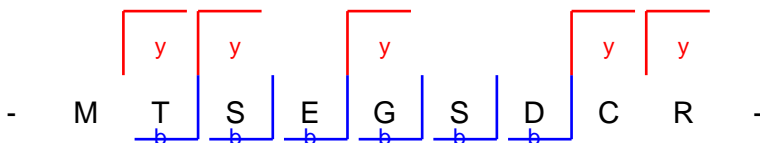

RO-QC-160121\_ZackD\_SS\_Set\_02\_Fraction 5415 FTMS; HC 113.41 566.79 NXNL1

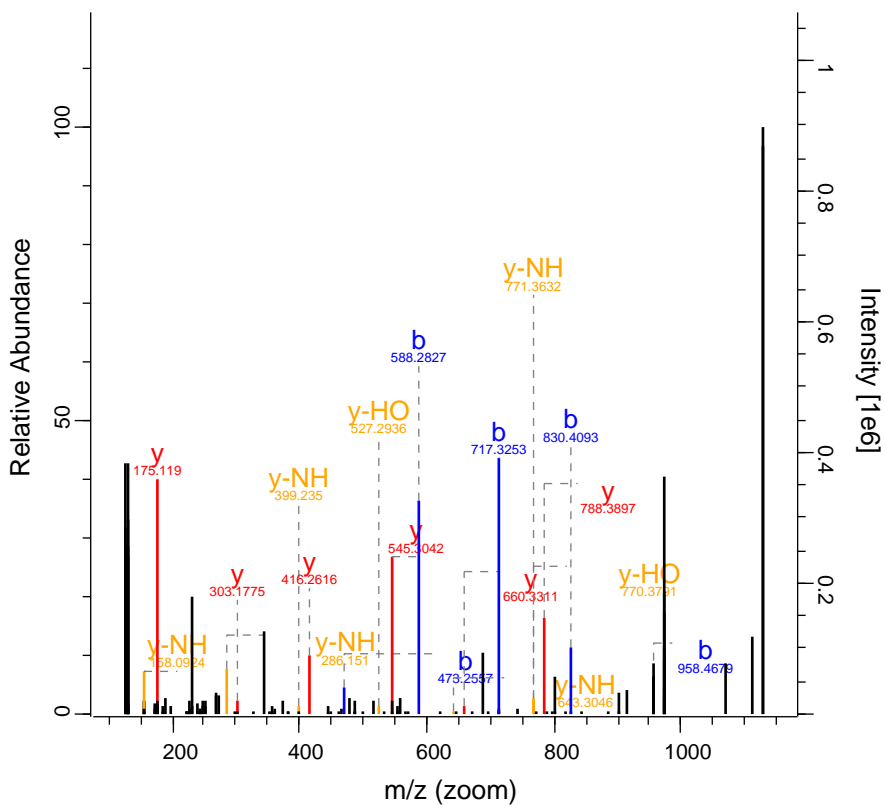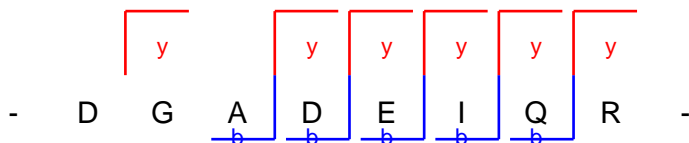





RO-QC-160121\_ZackD\_SS\_Set\_02\_Fraction 6052 FTMS; HCl 81.97 819.42 TMEM132B

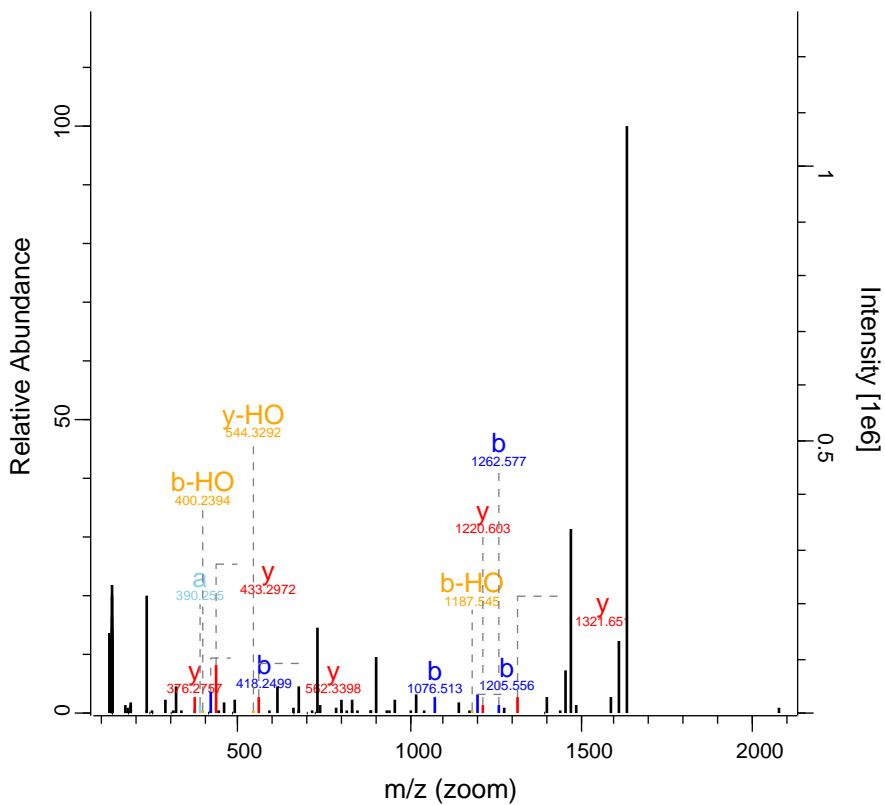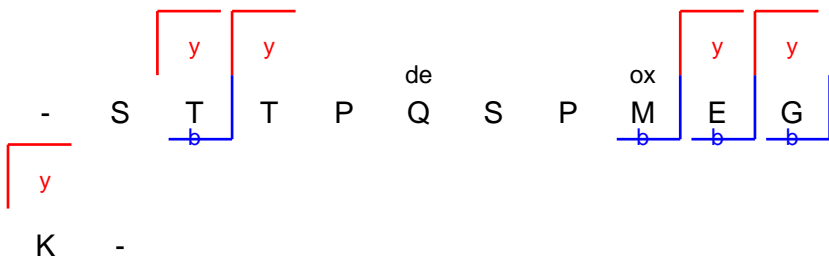

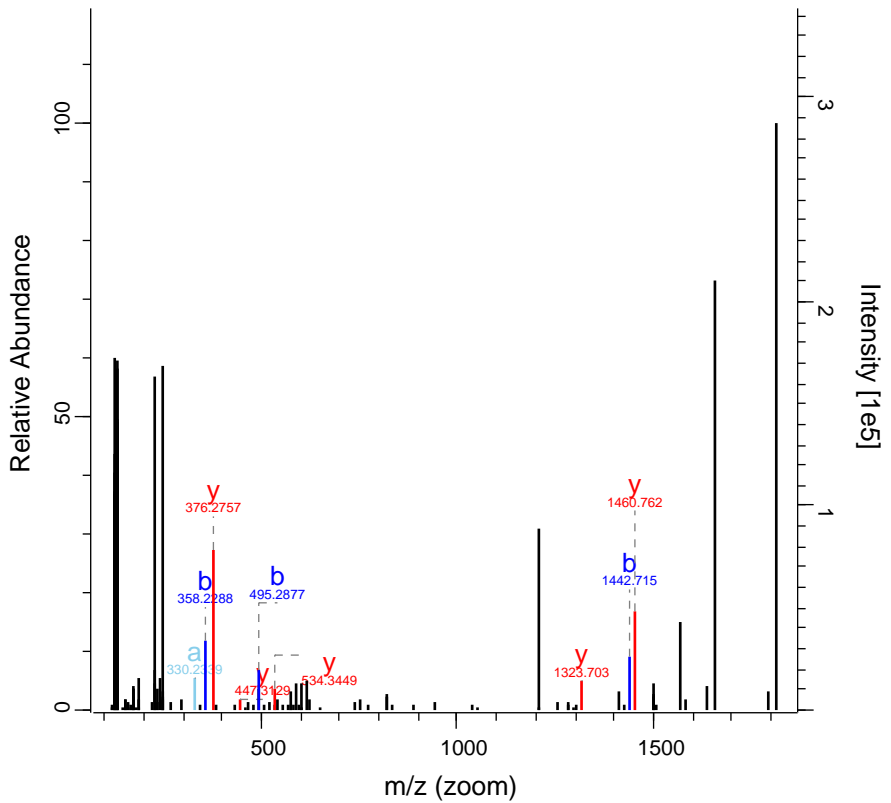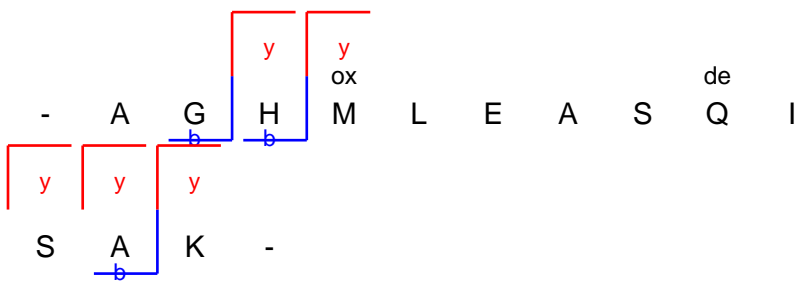

RO-QC-160121\_ZackD\_SS\_Set\_02\_Fraction 6083 FTMS; HCl 69.31 672.34 ADAMTS3

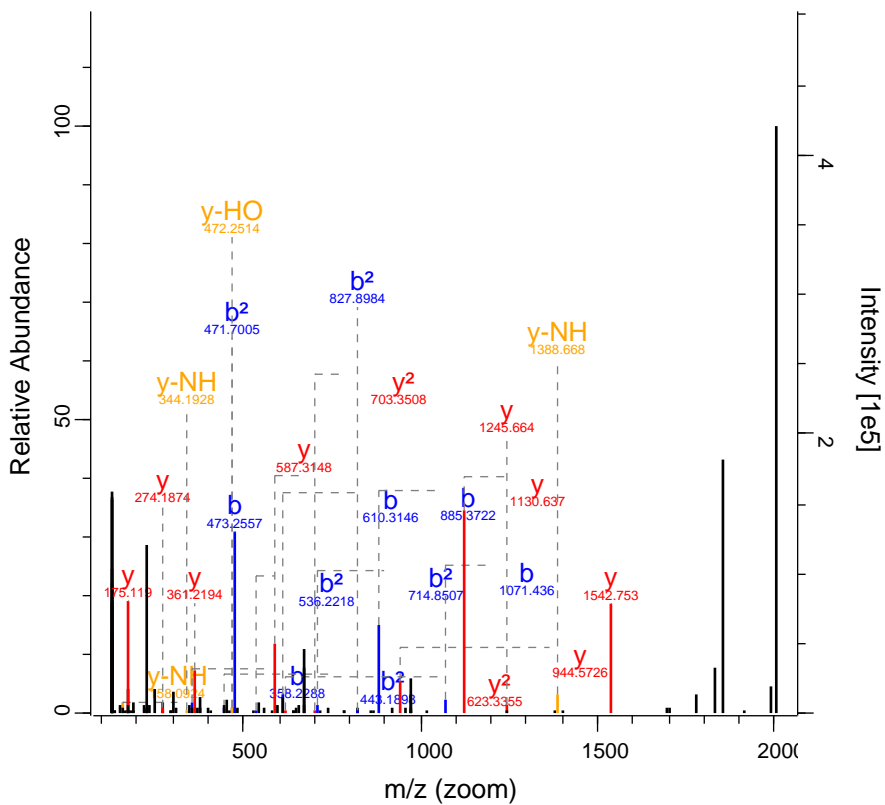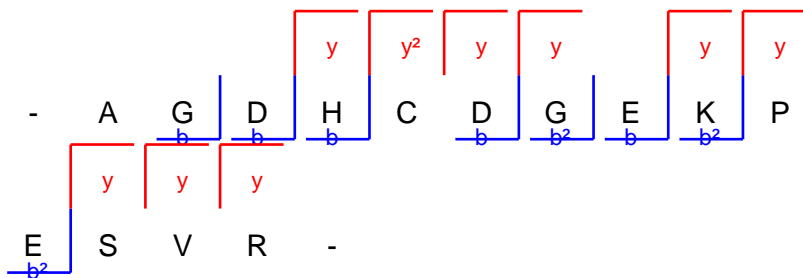

RO-QC-160121\_ZackD\_SS\_Set\_02\_Fraction 6289 FTMS; HC 102.52 385.24 MGP

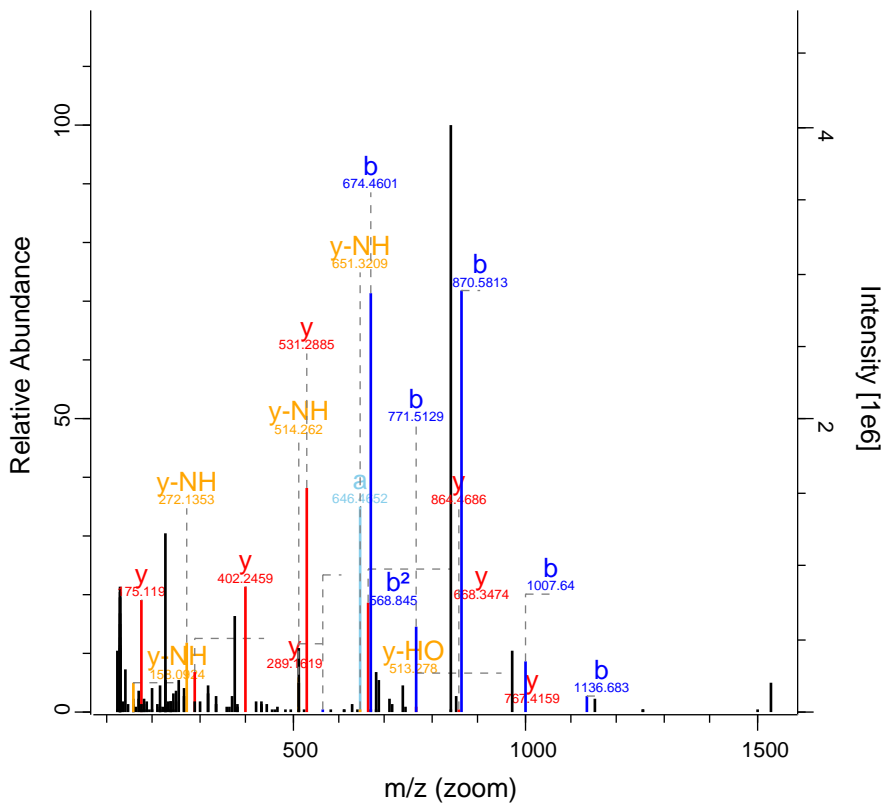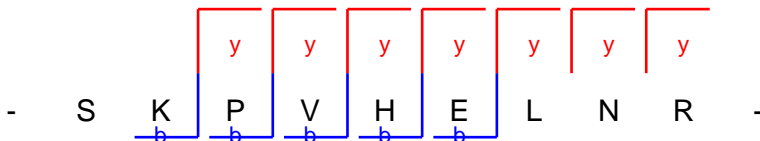

RO-QC-160121\_ZackD\_SS\_Set\_02\_Fraction 6618 FTMS; HCl 83.87 551.66 HAND2

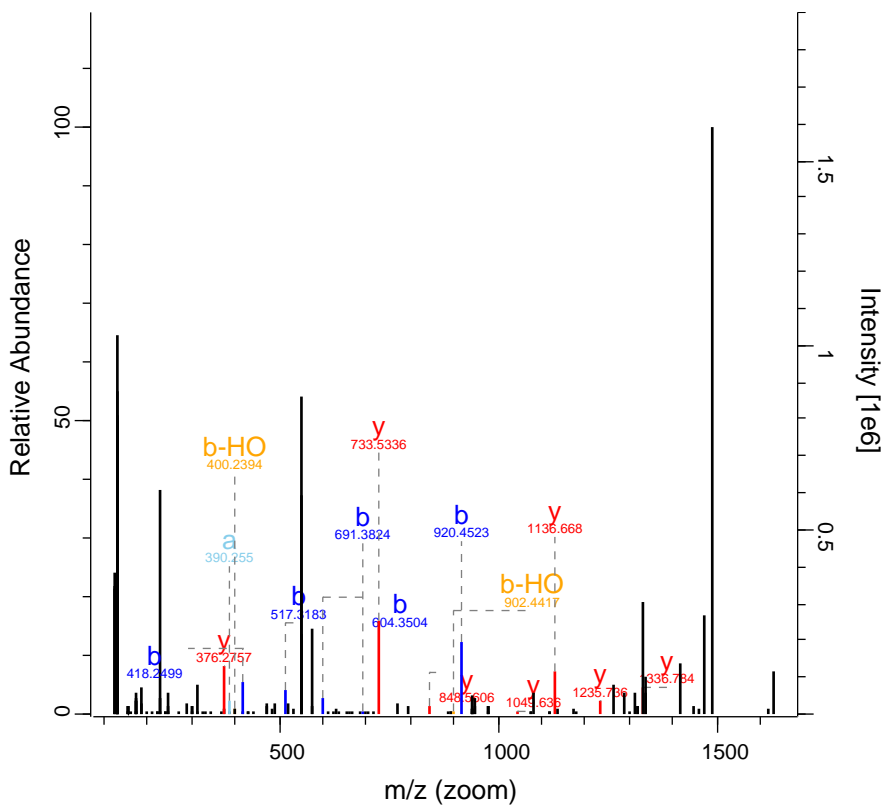

m/z (zoom)

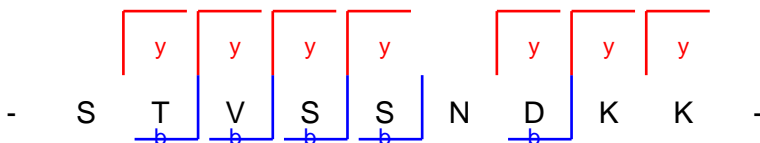

RO-QC-160121\_ZackD\_SS\_Set\_02\_Fraction 6674 FTMS; HC 103.82 674.36 TIPIN

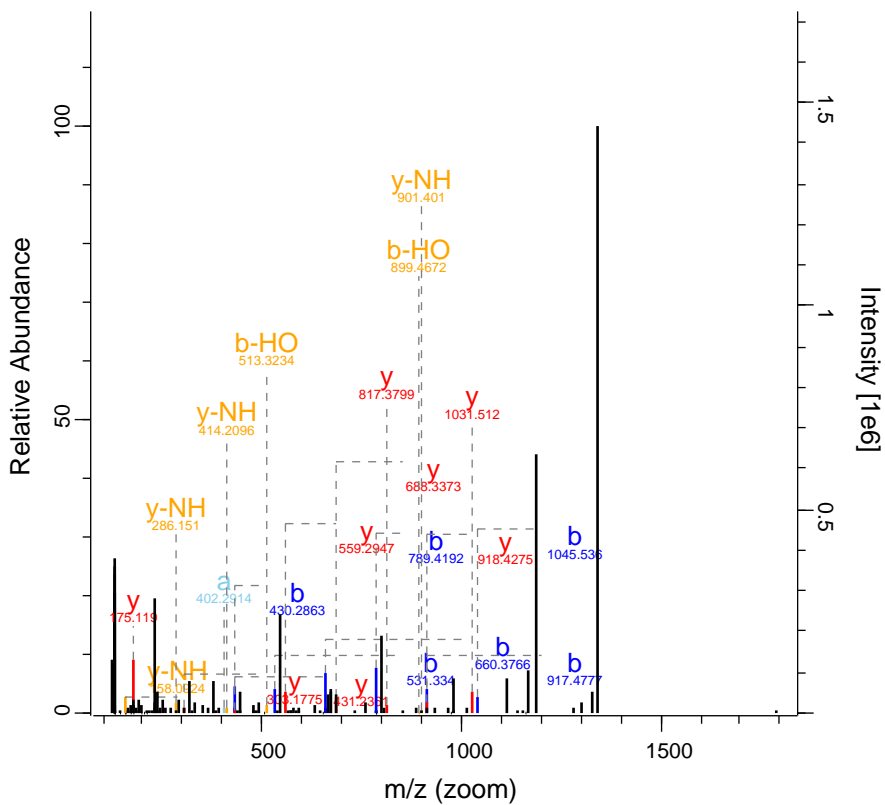

RO-QC-160121\_ZackD\_SS\_Set\_02\_Fraction 6829 FTMS; HCl 87.18 581.82 AIFM3

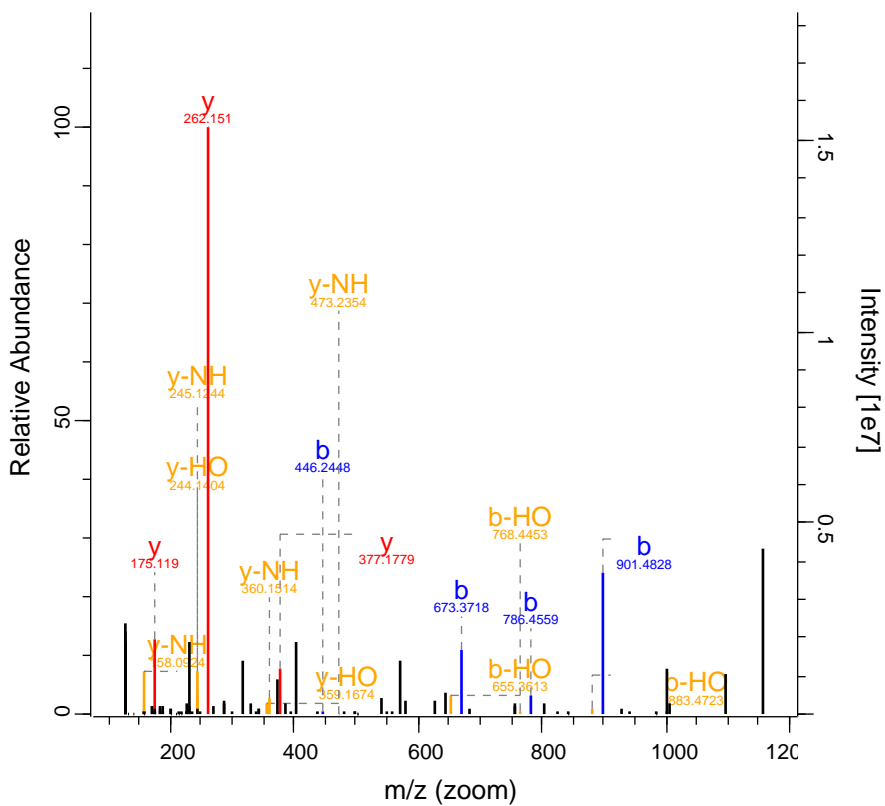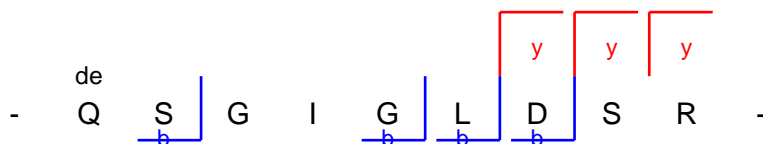

RO-QC-160121\_ZackD\_SS\_Set\_02\_Fraction 6945 FTMS; HC 131.06 682.87 ING5

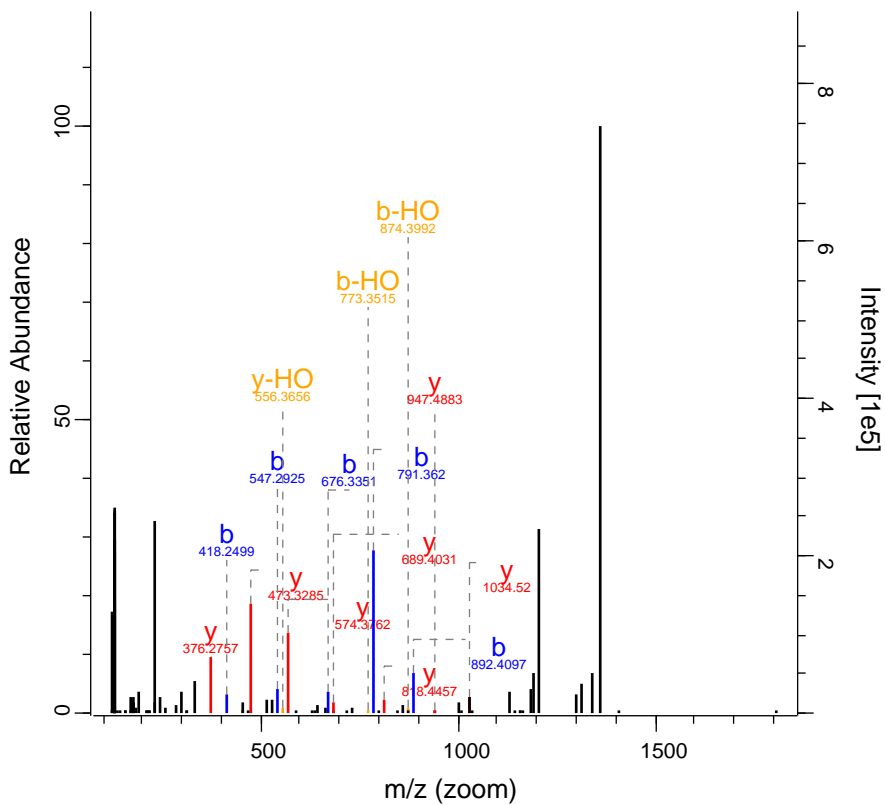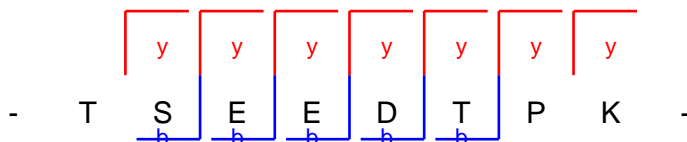



RO-QC-160121\_ZackD\_SS\_Set\_02\_Fraction 7072 FTMS; HCl 47.68 761.38 ADRA2B

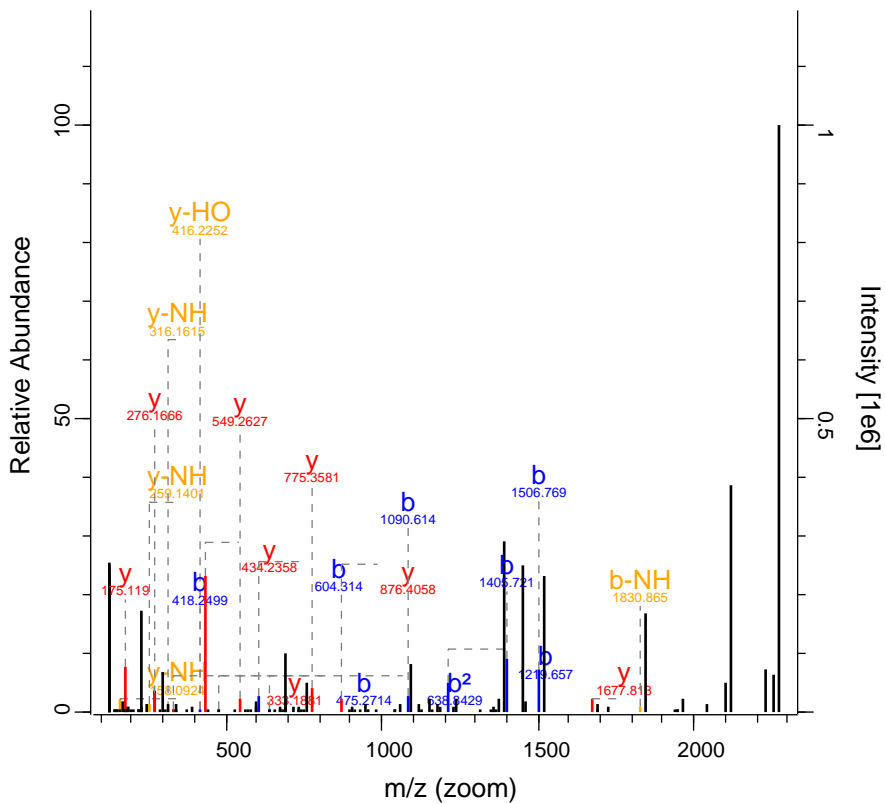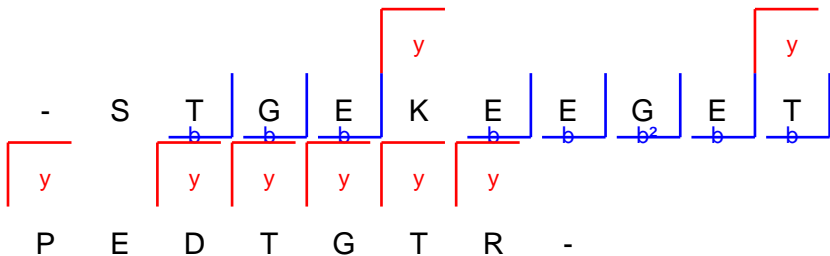

RO-QC-160121\_ZackD\_SS\_Set\_02\_Fraction 7470 FTMS; HCl 95.48 596.63 EXT1

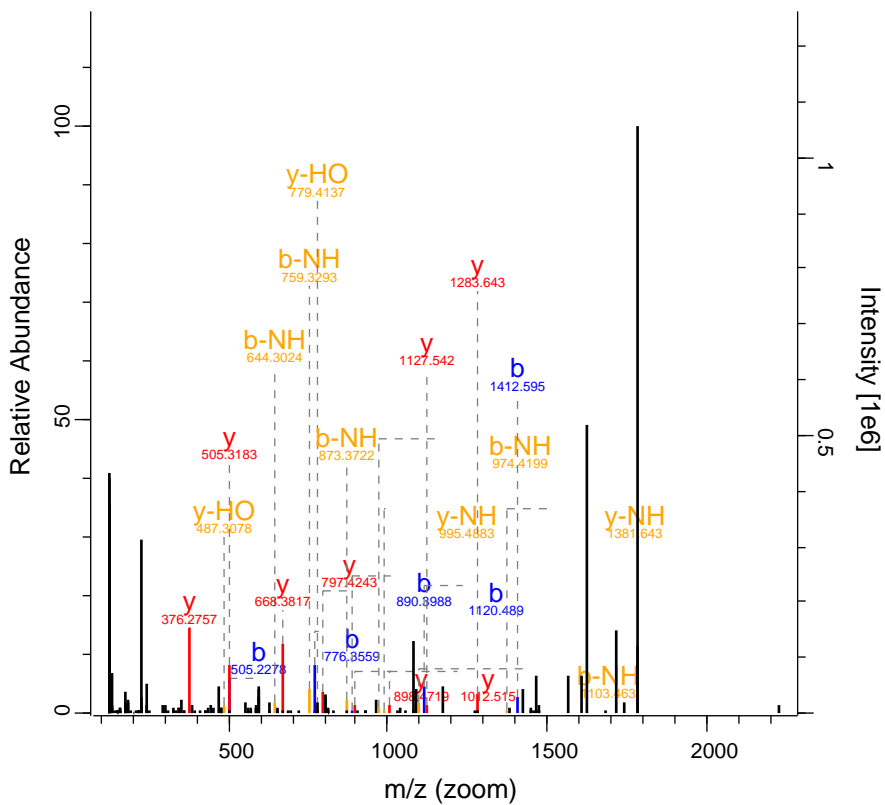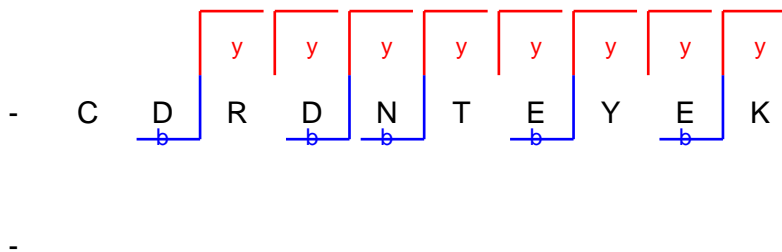

RO-QC-160121\_ZackD\_SS\_Set\_02\_Fraction 7823 FTMS; HCl 160.15 768.4 PLEKHH2

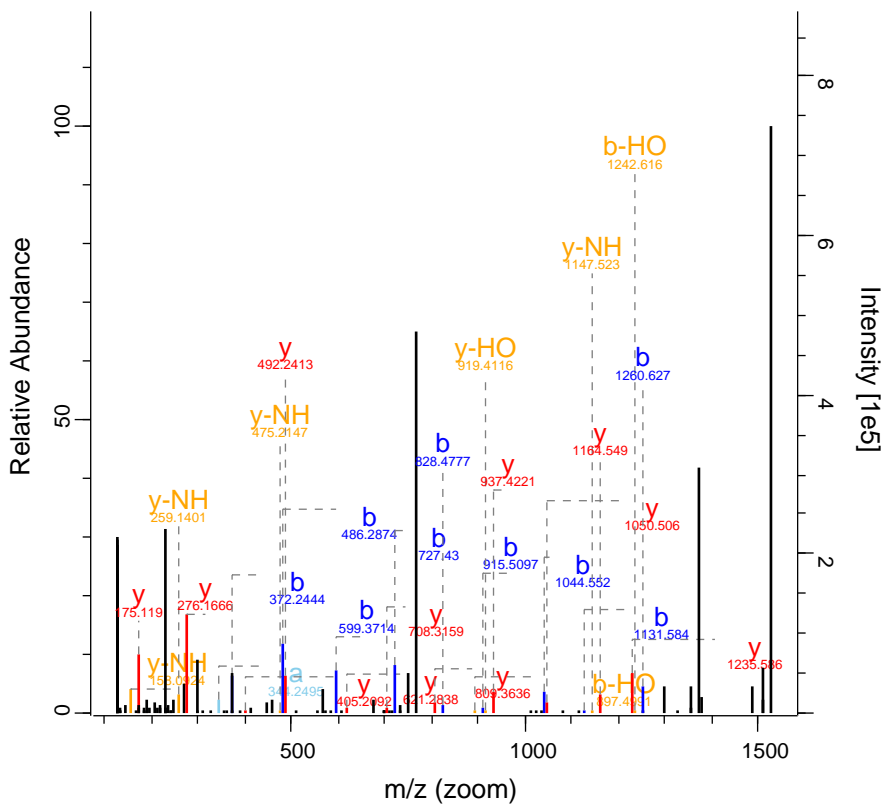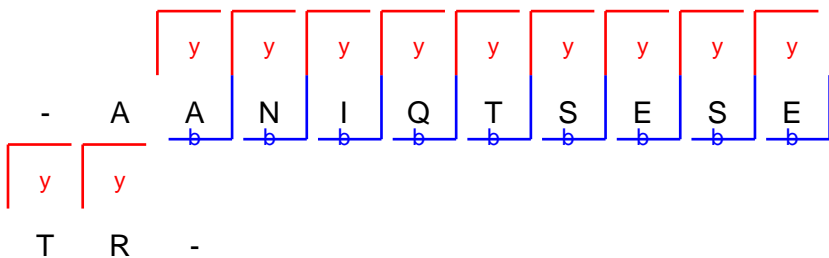

RO-QC-160121\_ZackD\_SS\_Set\_02\_Fraction 8013 FTMS; HC 155.06 780.42 INSIG2

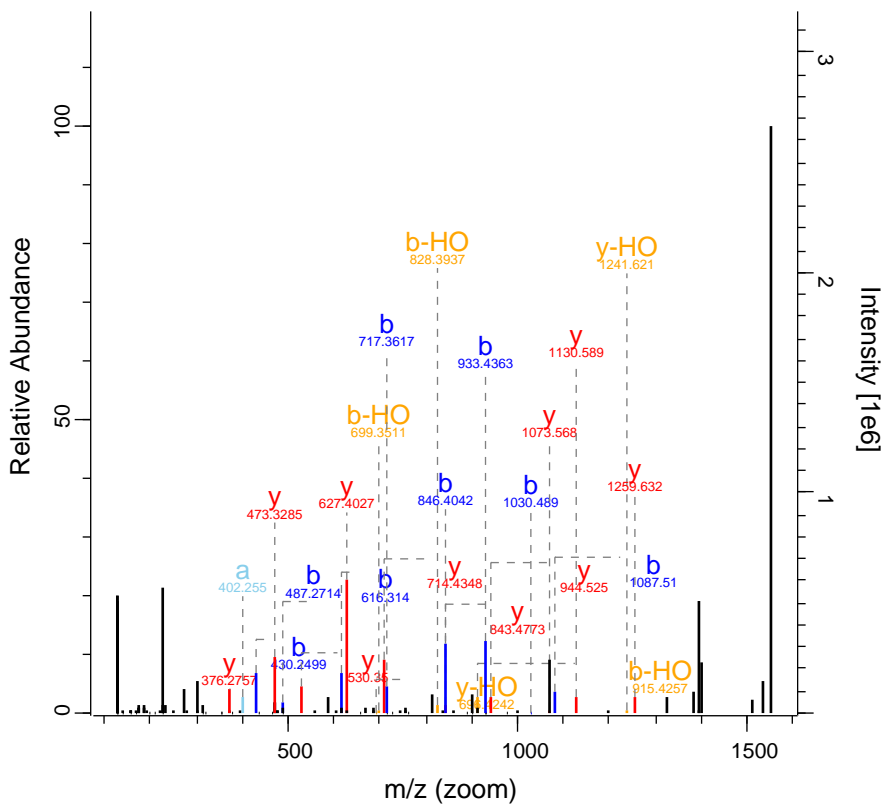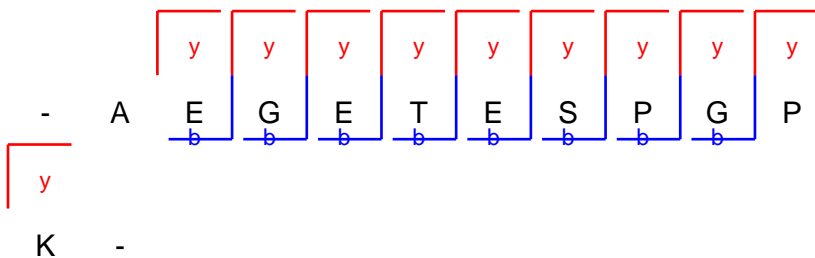

RO-QC-160121\_ZackD\_SS\_Set\_02\_Fraction 8698 FTMS; HC 155.51 637.39 G6PC3

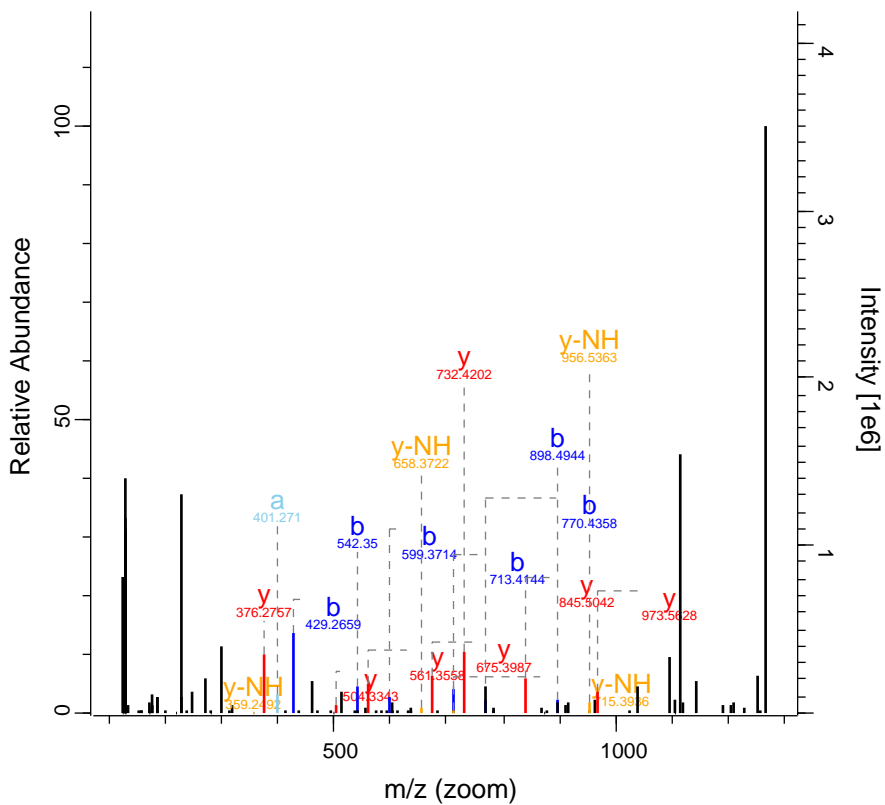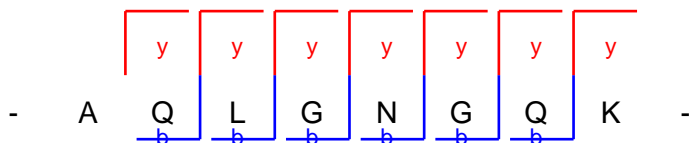

RO-QC-160121\_ZackD\_SS\_Set\_02\_Fraction 8842 FTMS; HCl 90.05 567.34 SLC35C1

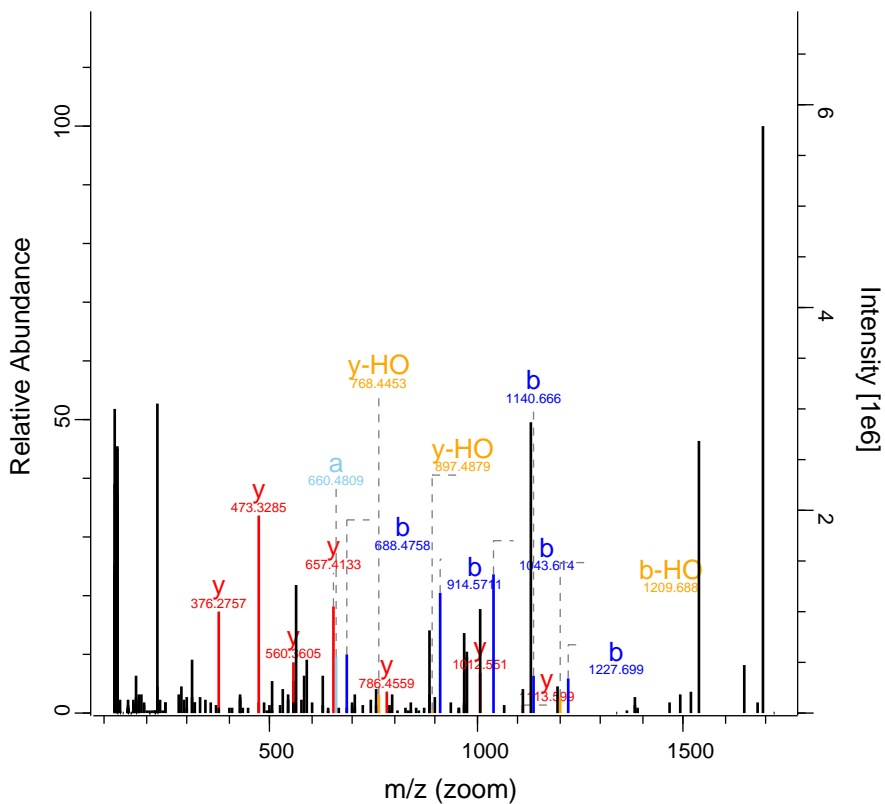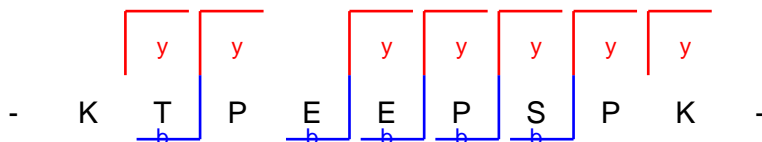

RO-QC-160121\_ZackD\_SS\_Set\_02\_Fraction 9067 FTMS; HCl 94.26 428.27 AZIN2

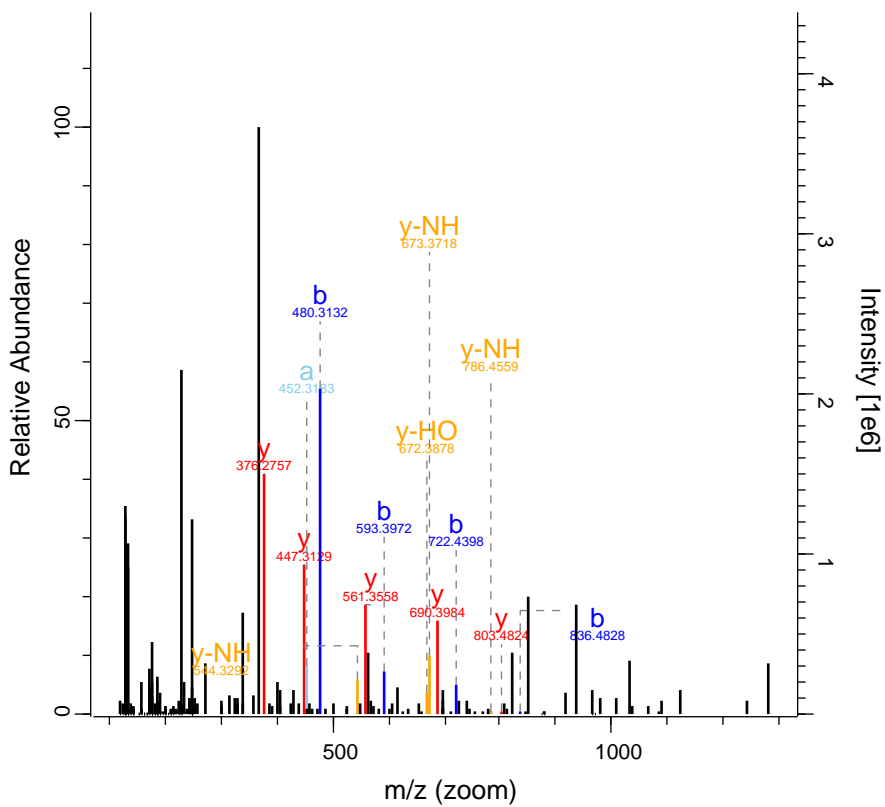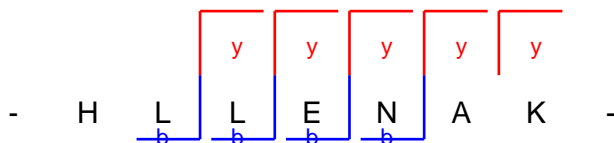

RO-QC-160121\_ZackD\_SS\_Set\_02\_Fraction 9905 FTMS; HCl 56.51 685.85 CRIPT

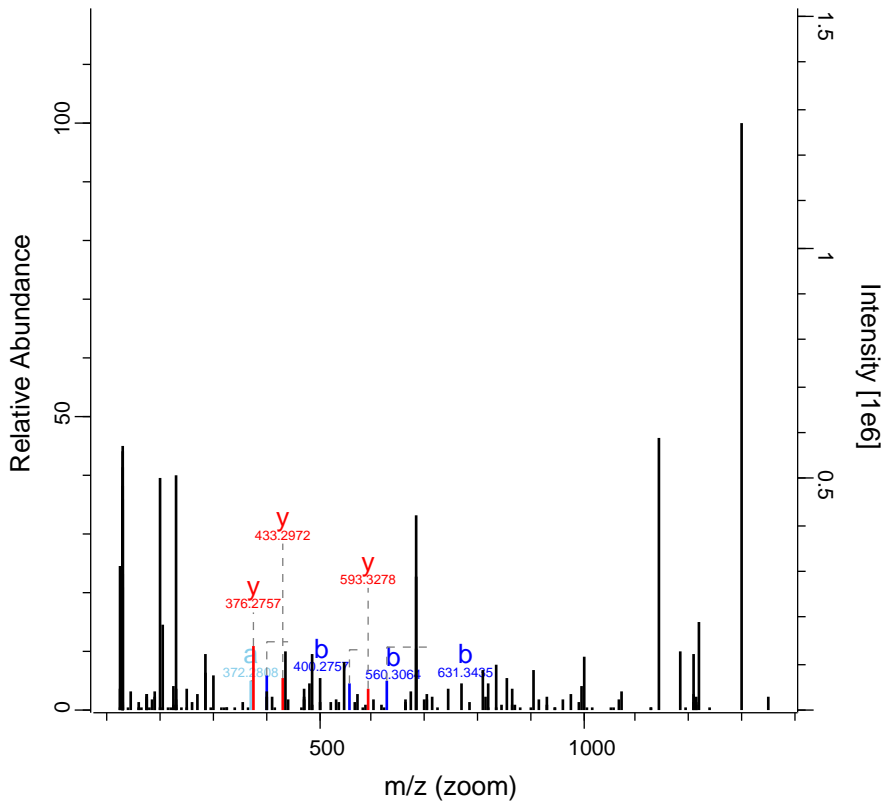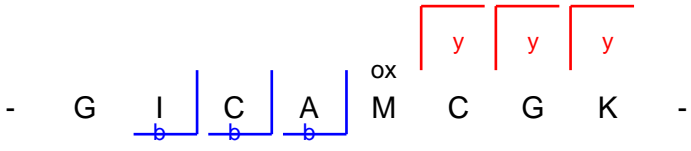



RO-QC-160121\_ZackD\_SS\_Set\_02\_Fraction 9919 FTMS; HC 185.33 680.38 ANKRD16

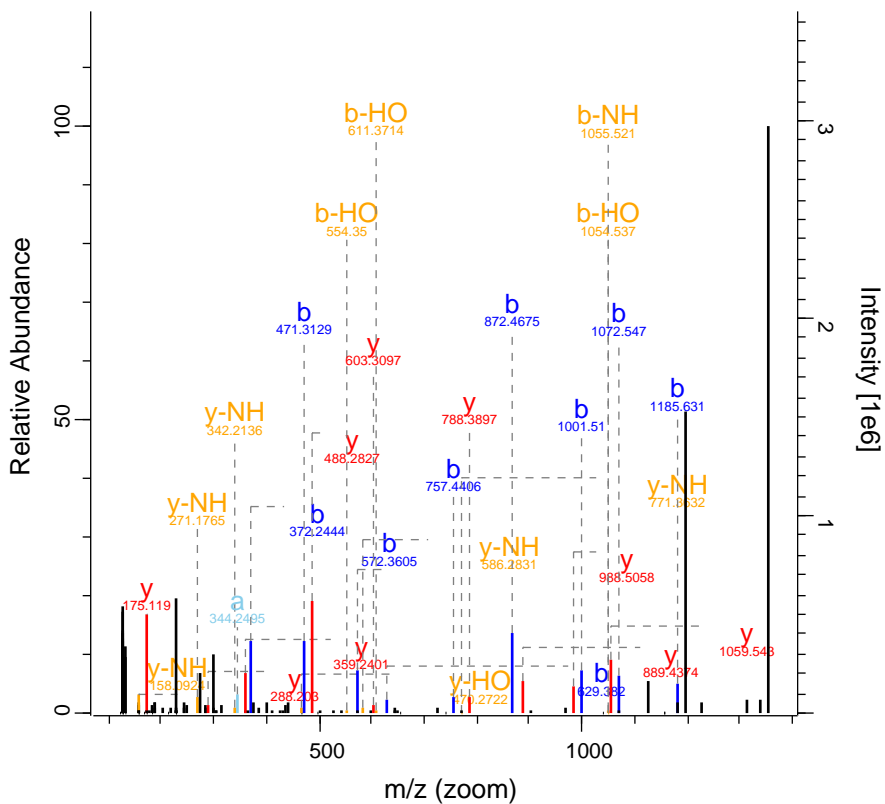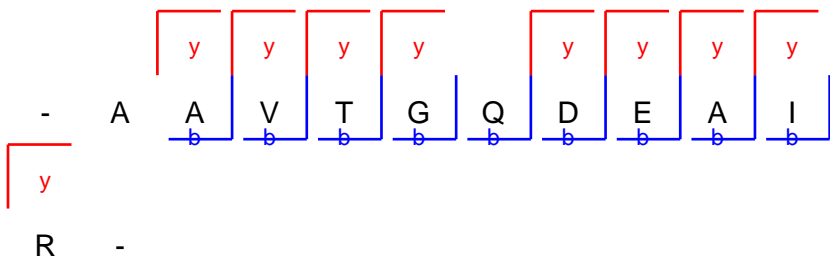

RO-QC-160121\_ZackD\_SS\_Set\_02\_Fraction 10667 FTMS; HC 73.21 722.02 C16orf70

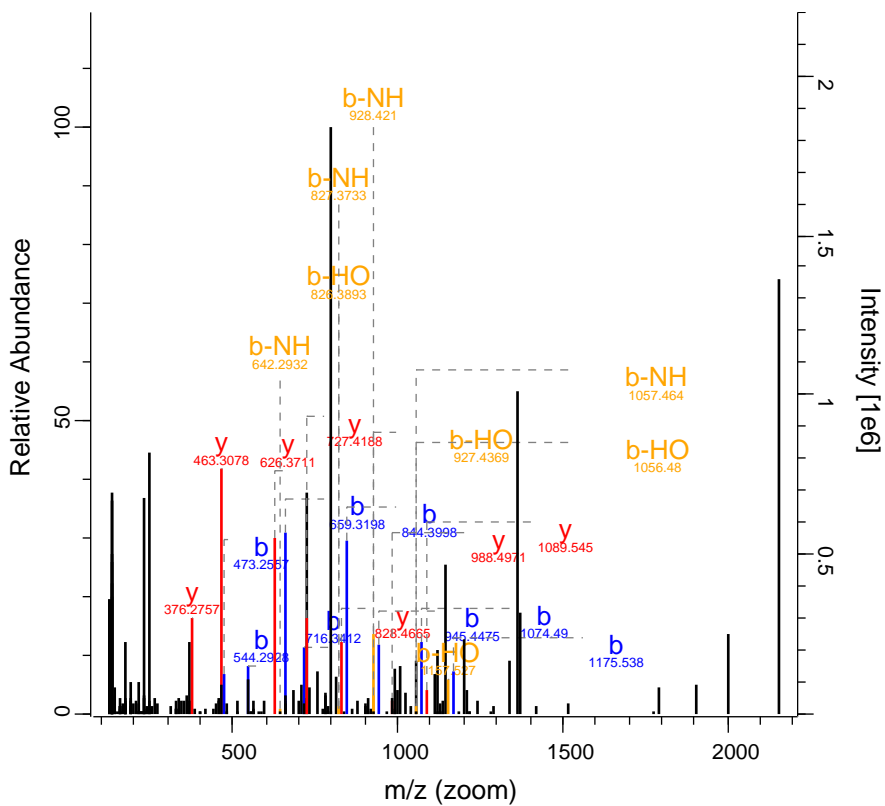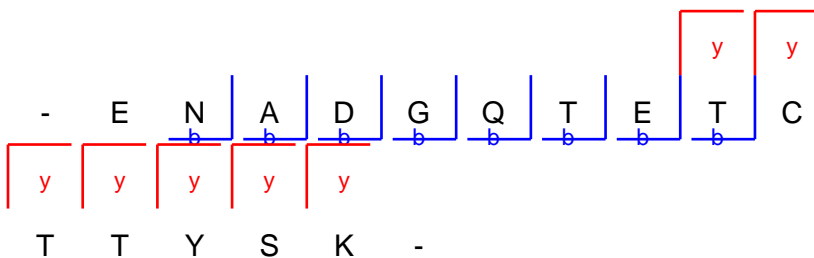

T T Y S K -

RO-QC-160121\_ZackD\_SS\_Set\_02\_Fraction10965 FTMS; HCl 111.73 356.9 CENPA

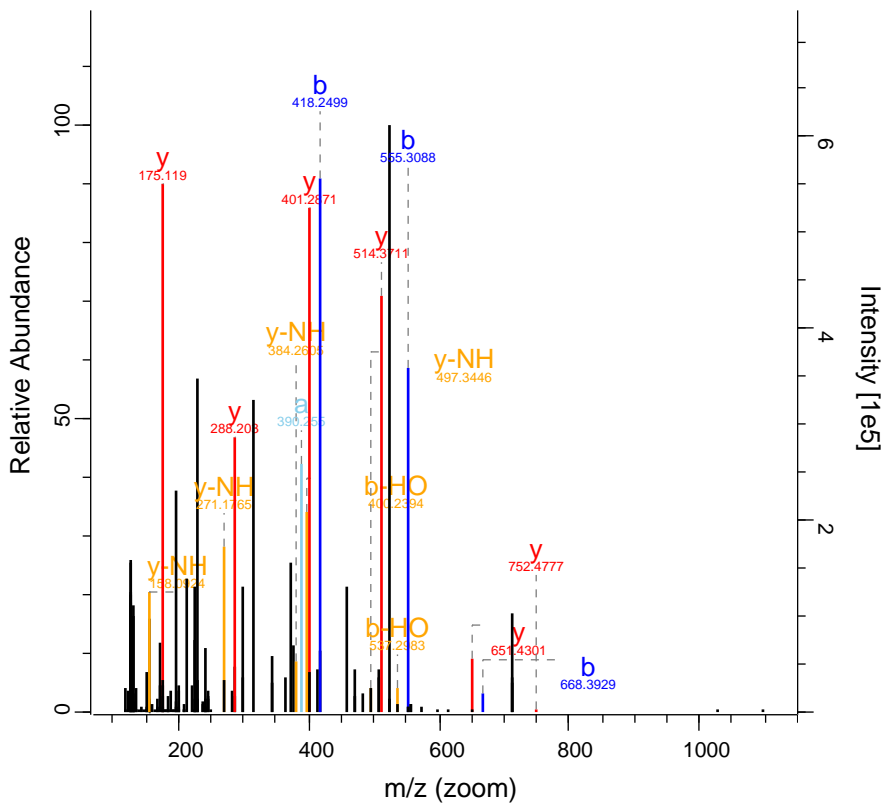

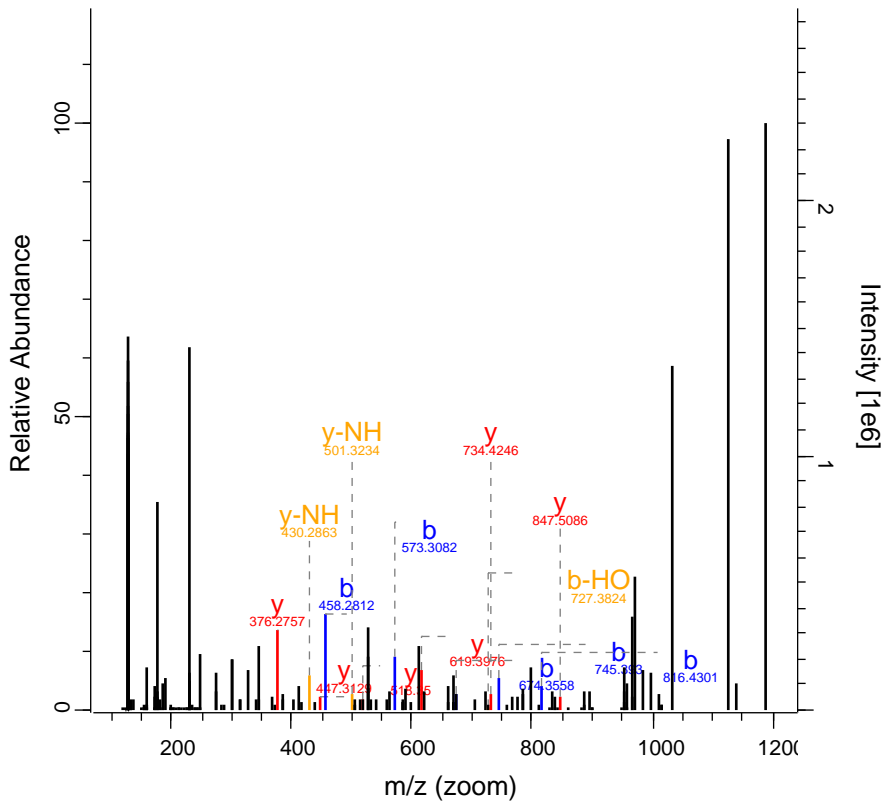

RO-QC-160121\_ZackD\_SS\_Set\_02\_Fraction12432 FTMS; HCl 108.46 379.9 FRMD4B

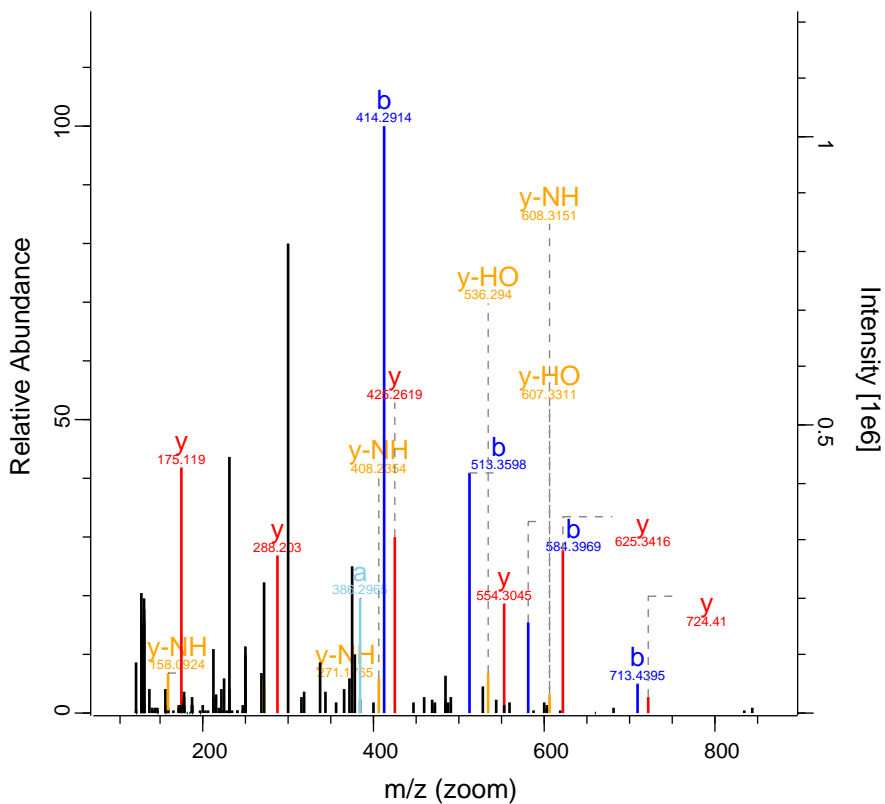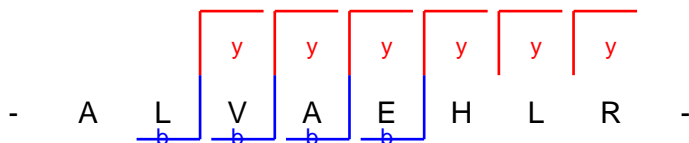

RO-QC-160121\_ZackD\_SS\_Set\_02\_Fractio 13056 FTMS; HC 110.31 714.86 FRAS1

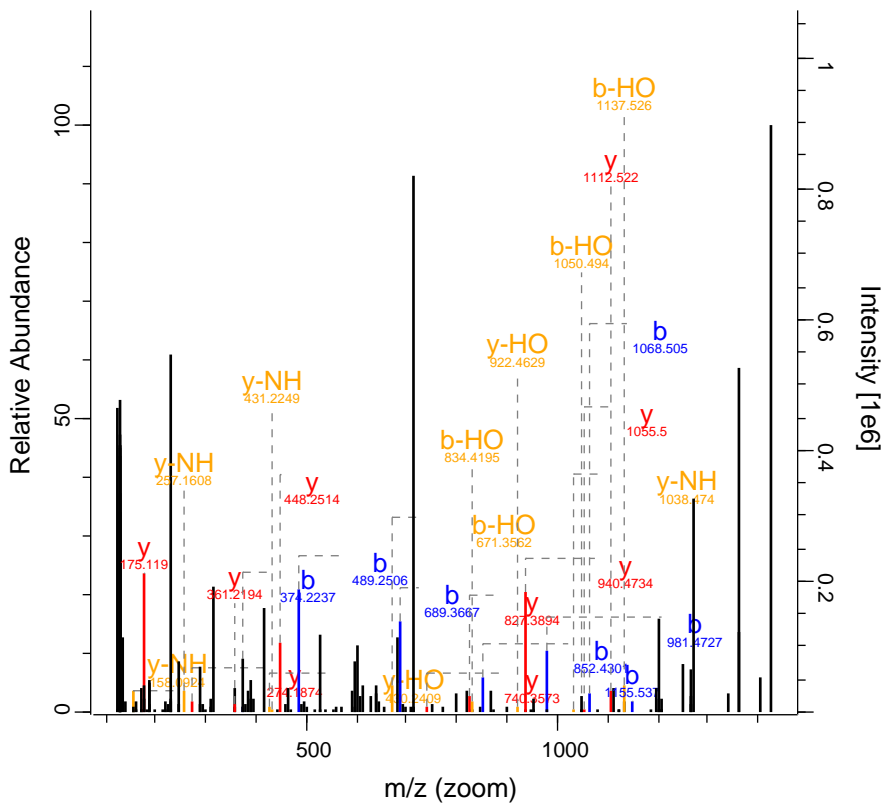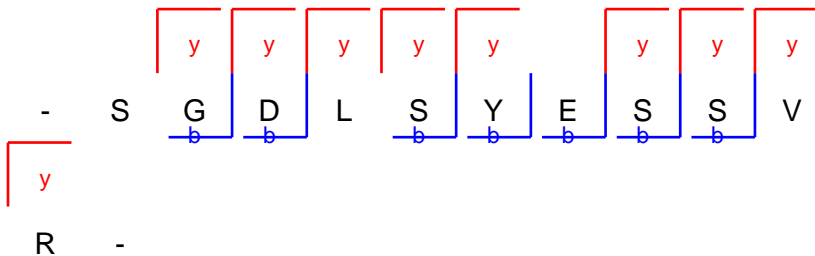

RO-QC-160121\_ZackD\_SS\_Set\_02\_Fraction 13616 FTMS; HC 86.01 569.36 RIC8B

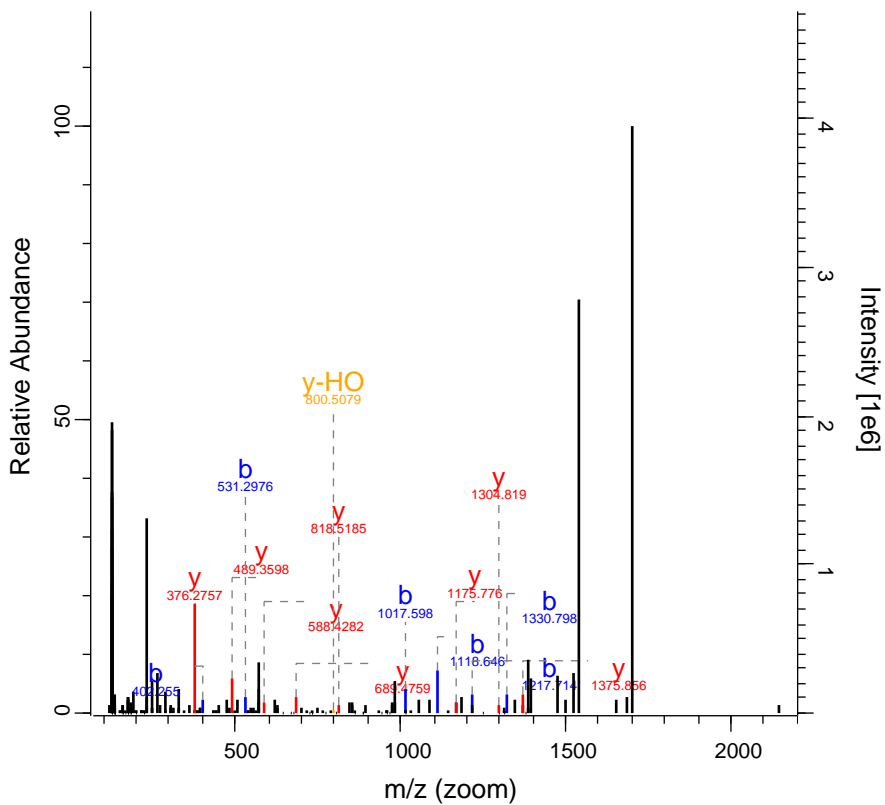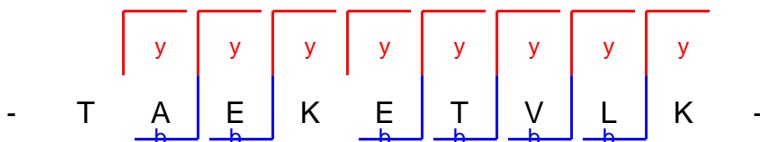

Raw File

Scan Method Score m/z

RO-QC-160121\_ZackD\_SS\_Set\_02\_Fraction\_6

13636 FTMS; HCD 73.26 434.27

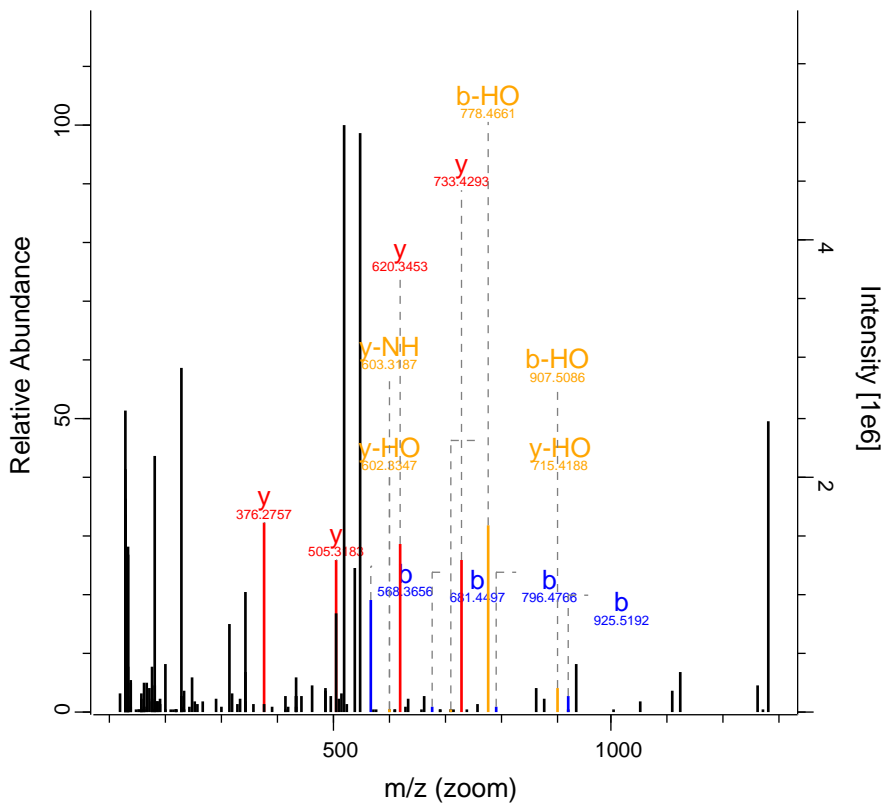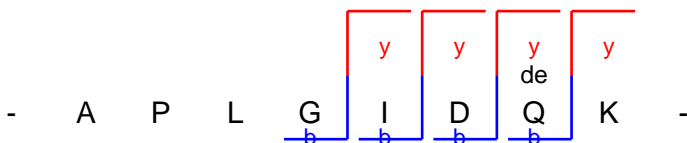



RO-QC-160121\_ZackD\_SS\_Set\_02\_Fractio 13817 FTMS; HC 110.53 701.38 ANKH

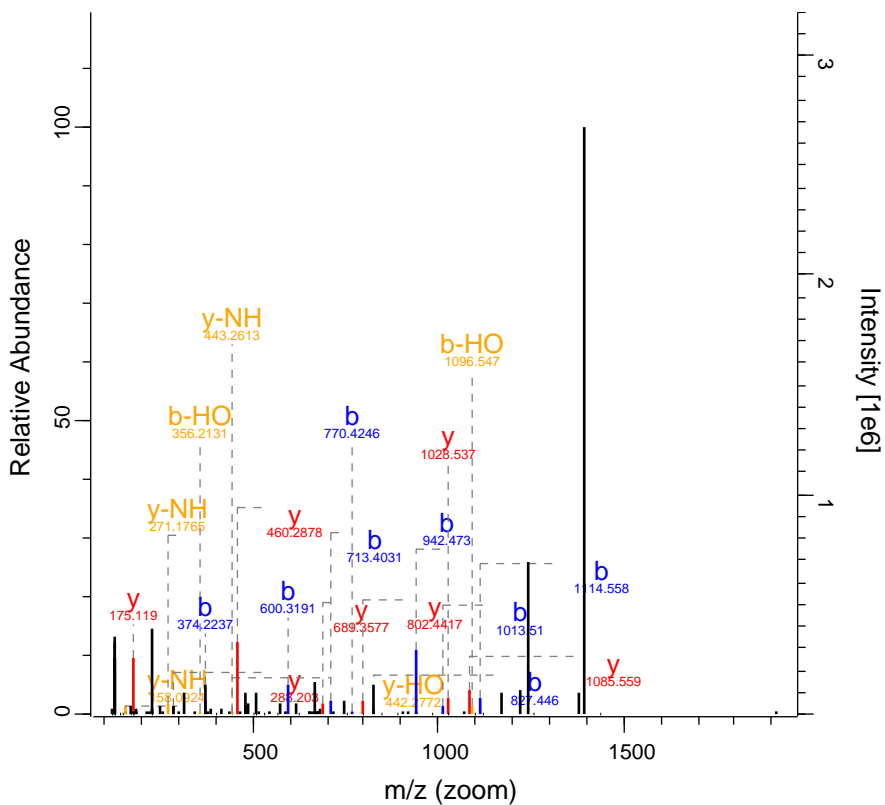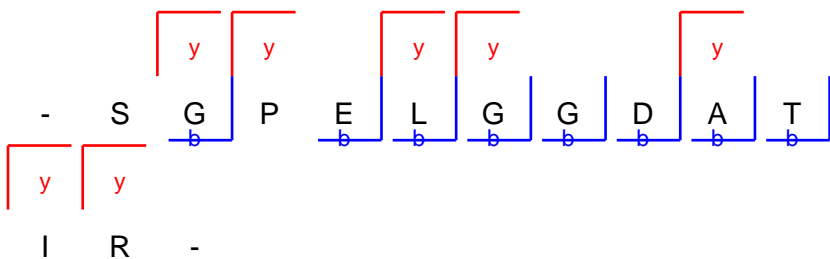

RO-QC-160121\_ZackD\_SS\_Set\_02\_Fractio 14688 FTMS; HC 146.48 763.88 FCF1

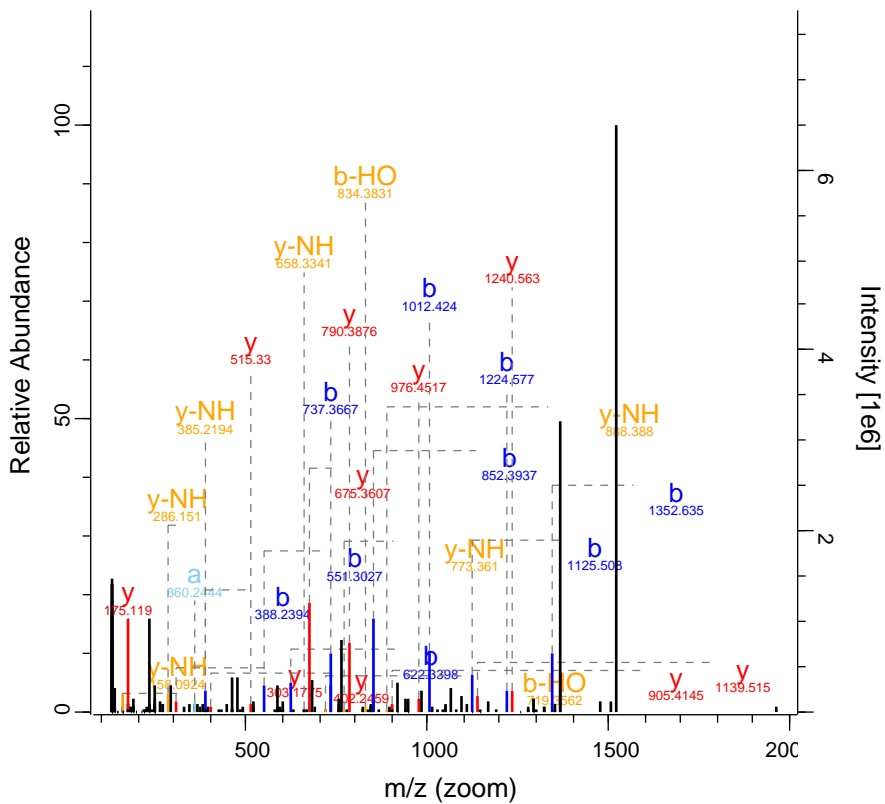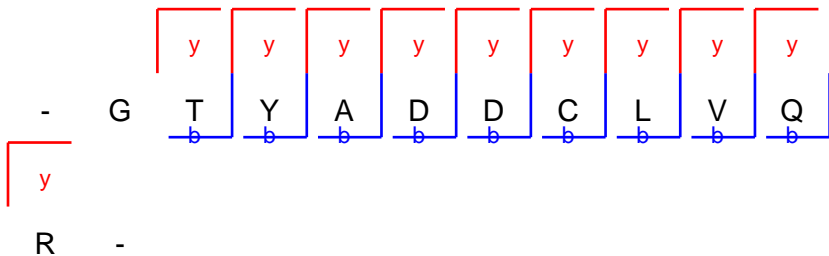

R -

RO-QC-160121\_ZackD\_SS\_Set\_02\_Fractio 15242 FTMS; HC 112.83 441.94 DALRD3

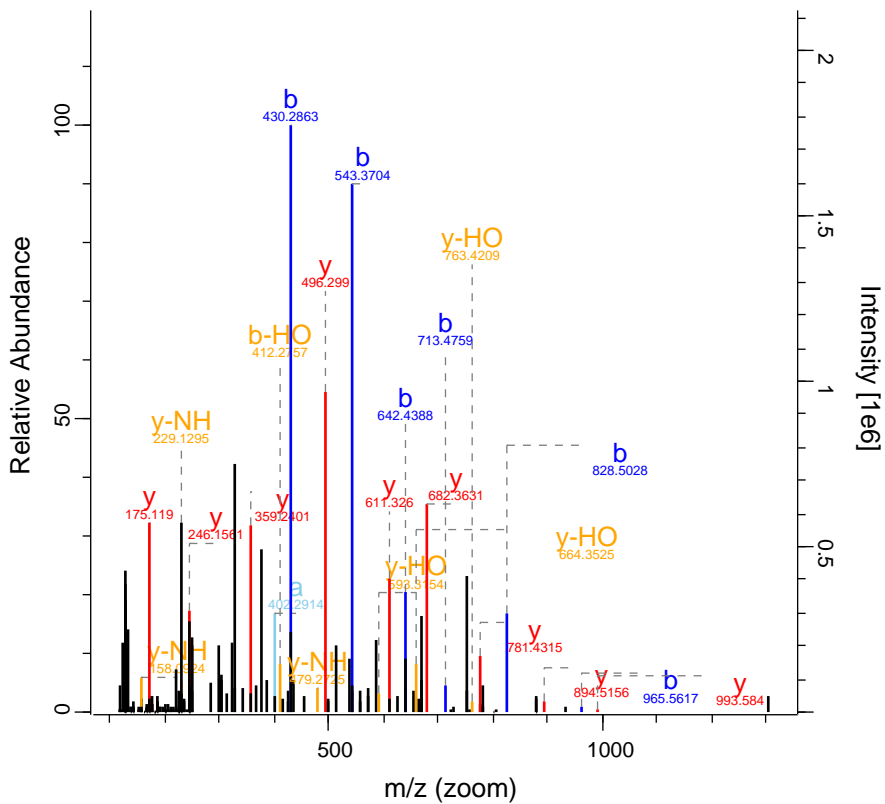

m/z (zoom)

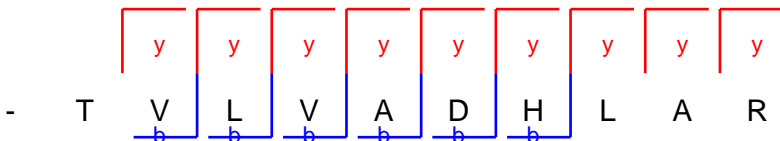

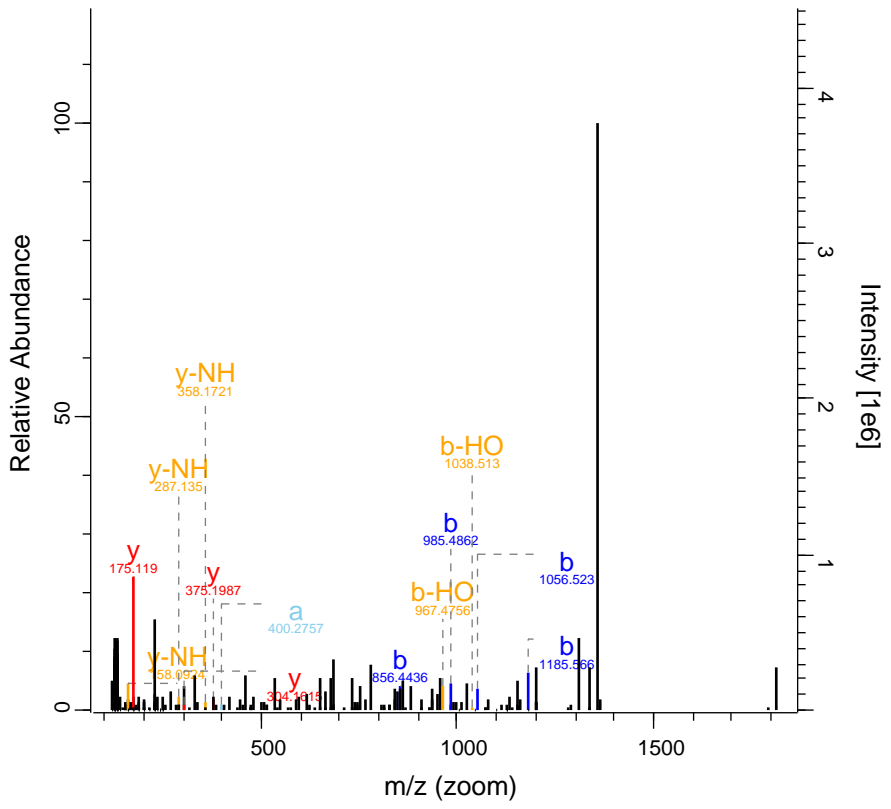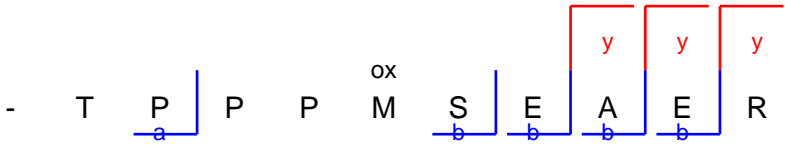

-

-

RO-QC-160121\_ZackD\_SS\_Set\_02\_Fraction 15348 FTMS; HC 55.81 538.65 ATP5SL

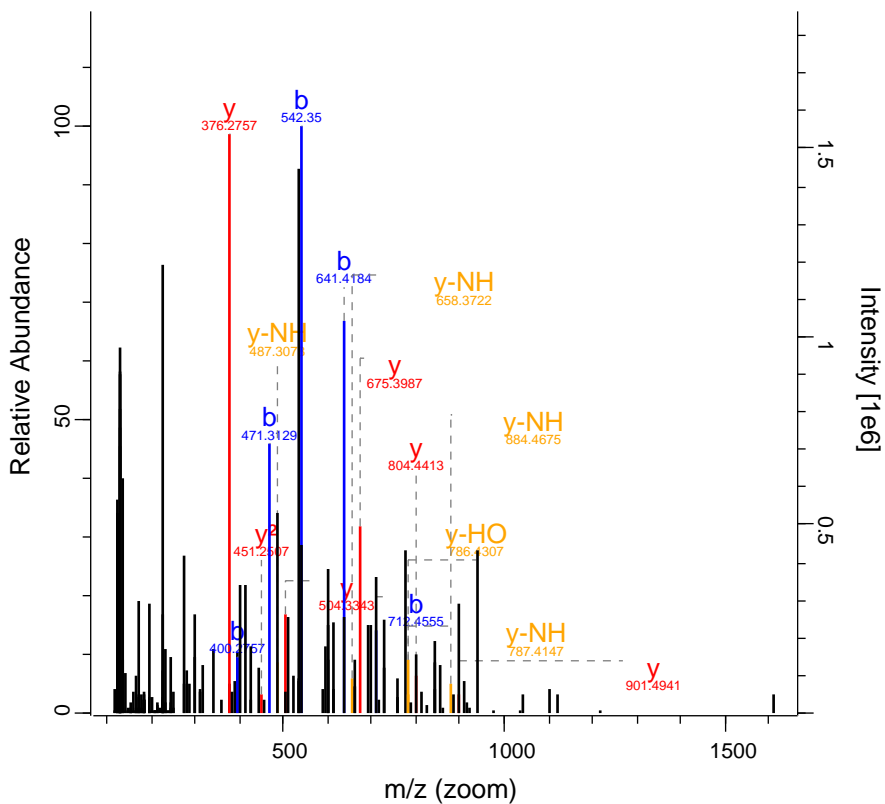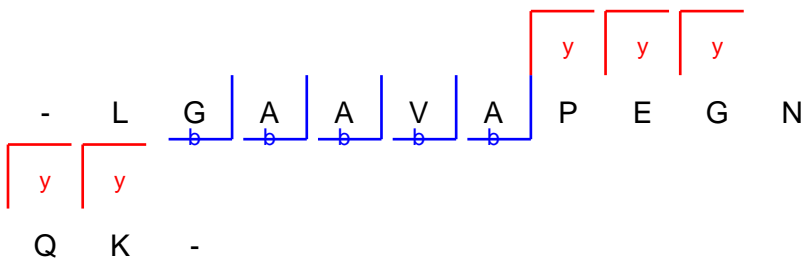

Raw File

Scan Method Score m/z

RO-QC-160121\_ZackD\_SS\_Set\_02\_Fraction\_6

16093 FTMS; HCD 98.52 681.91

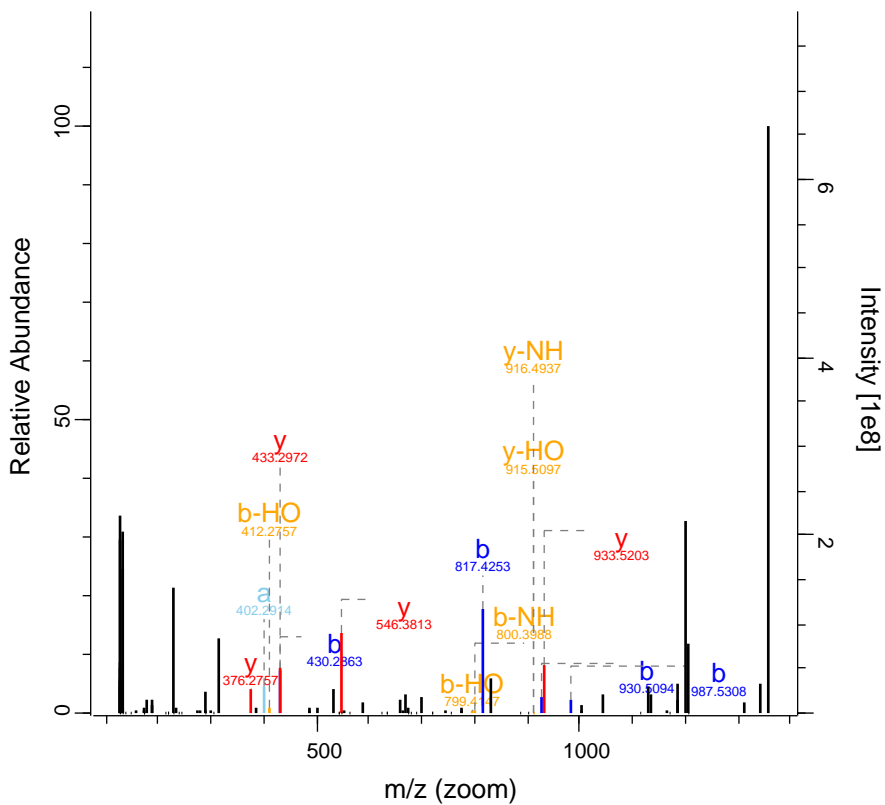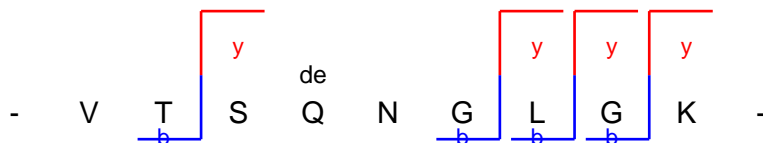

RO-QC-160121\_ZackD\_SS\_Set\_02\_Fraction16254 FTMS; HC 67.73 572.82 CCDC173

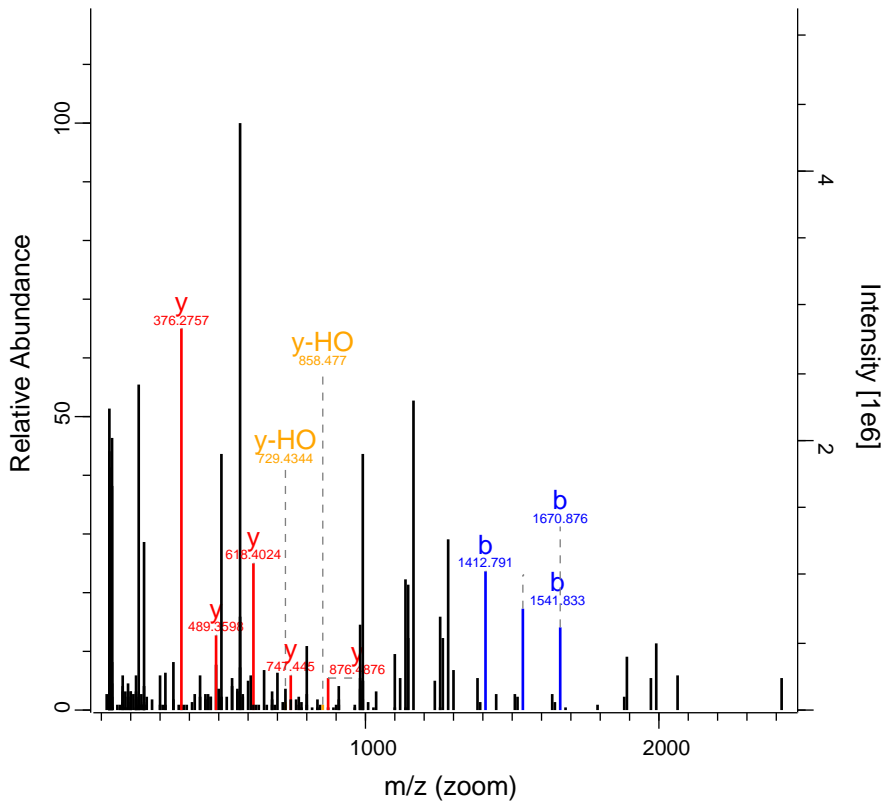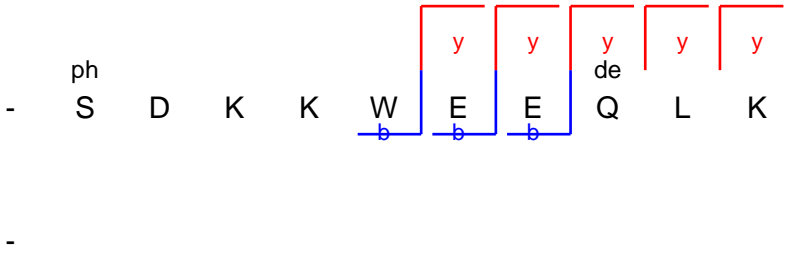

Raw File

Scan

Method

Score

m/z

RO-QC-160121\_ZackD\_SS\_Set\_02\_Fraction\_6

16312

FTMS; HCD

122.74

667.41

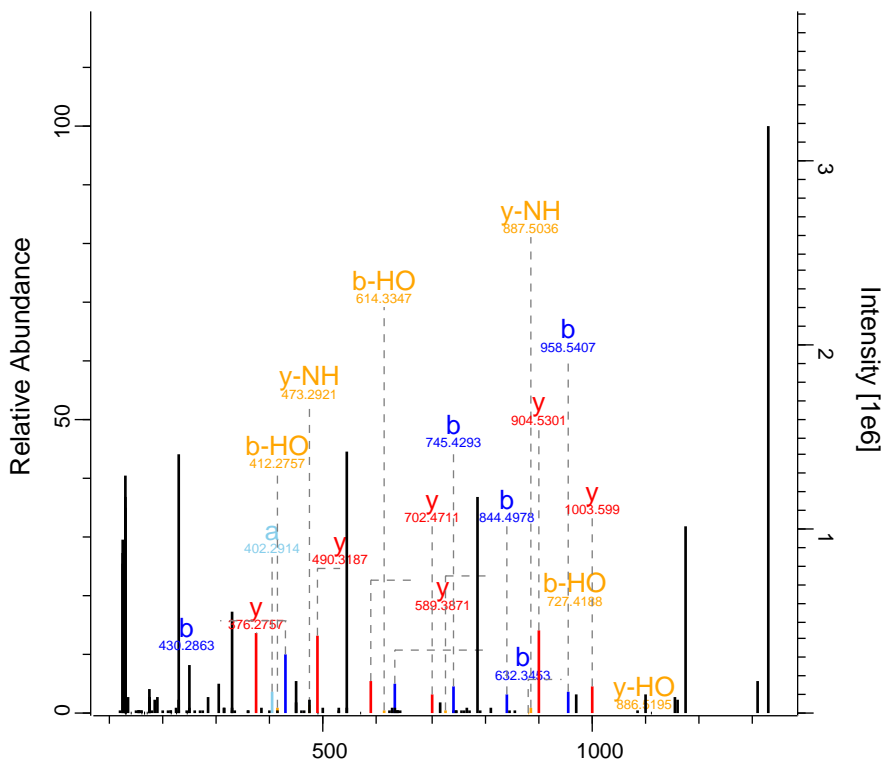

m/z (zoom)

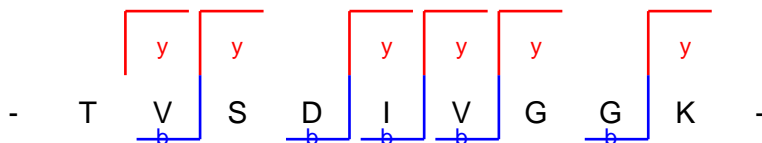



RO-QC-160121\_ZackD\_SS\_Set\_02\_Fraction 16440 FTMS; HC 112.3 760.73 ZFYVE27

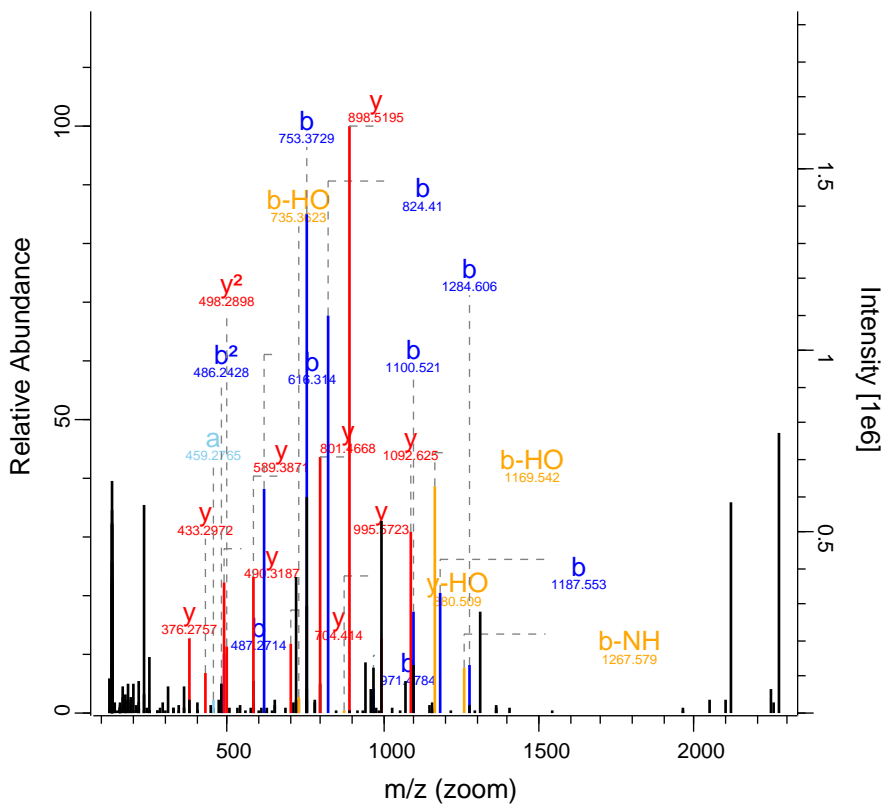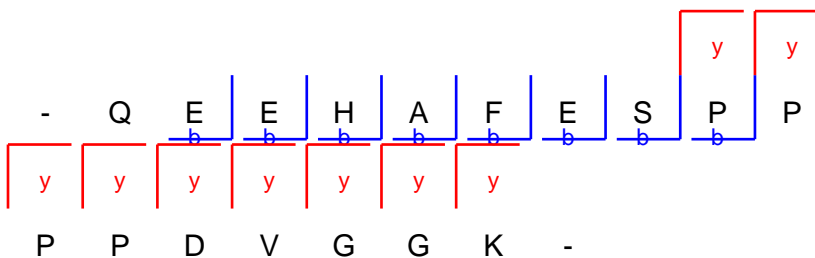

RO-QC-160121\_ZackD\_SS\_Set\_02\_Fractio 16637 FTMS; HC 253.79 955.01 NIPA1

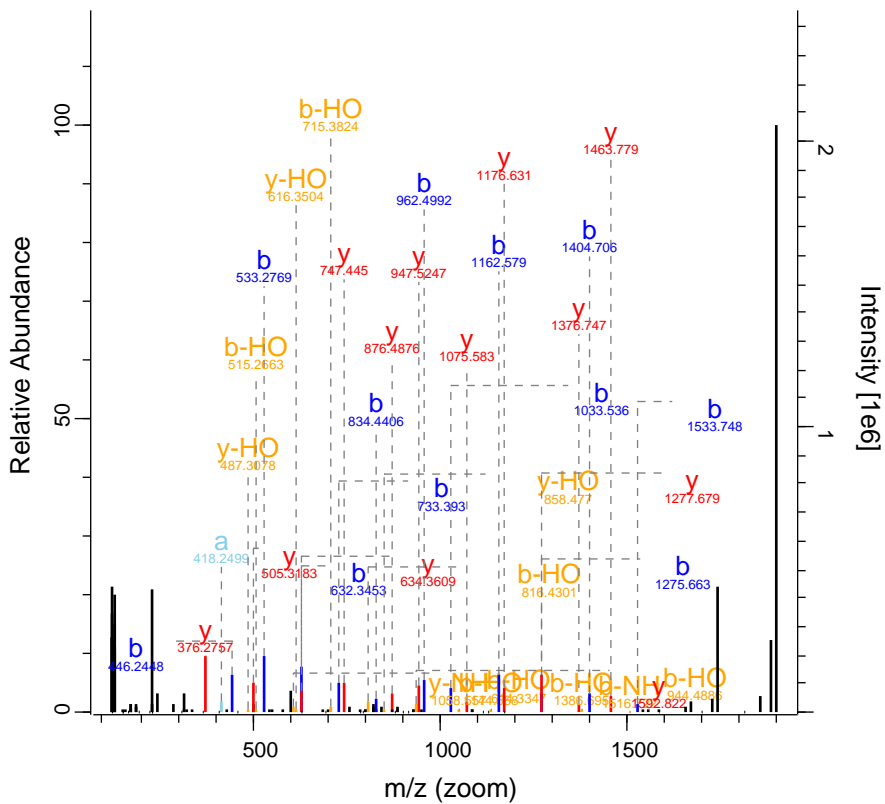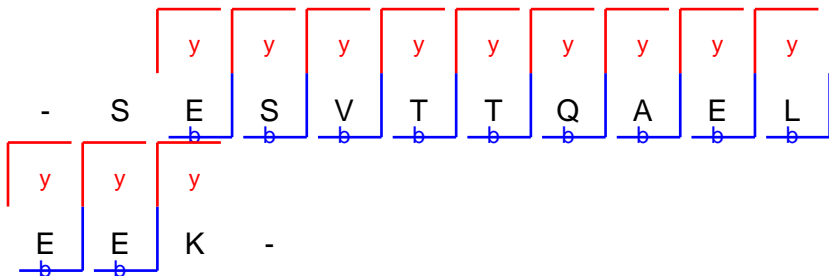

RO-QC-160121\_ZackD\_SS\_Set\_02\_Fractio 16742 FTMS; HC 141.55 484.83 CLIP4

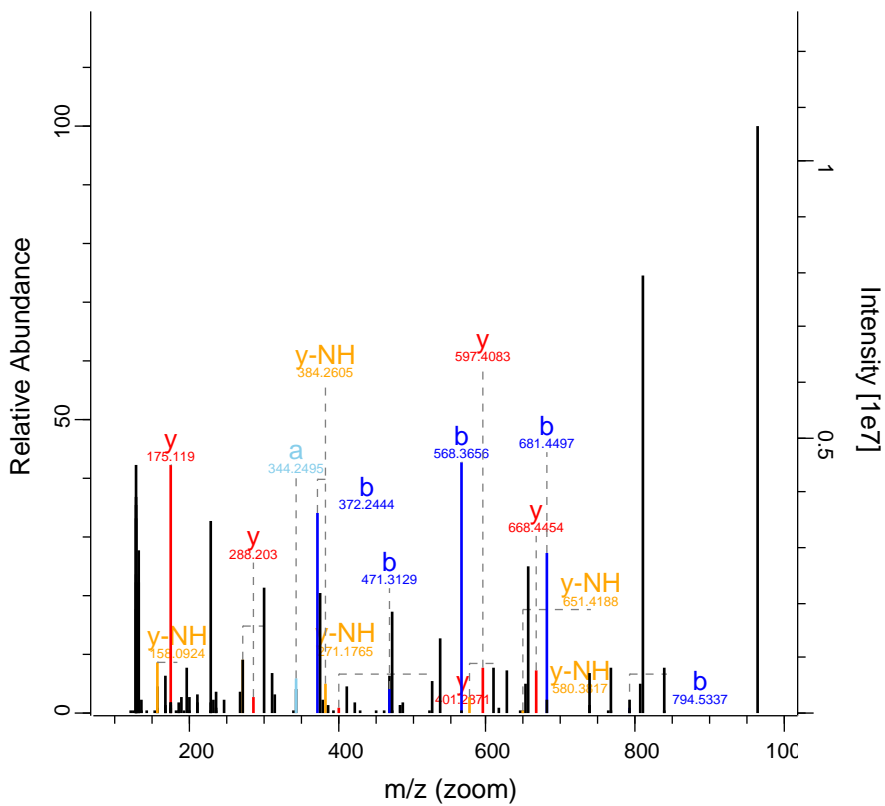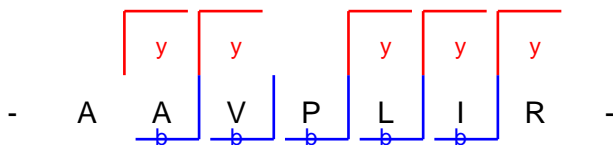

RO-QC-160121\_ZackD\_SS\_Set\_02\_Fraction 17377 FTMS; HC 78.33 461.29 IL33

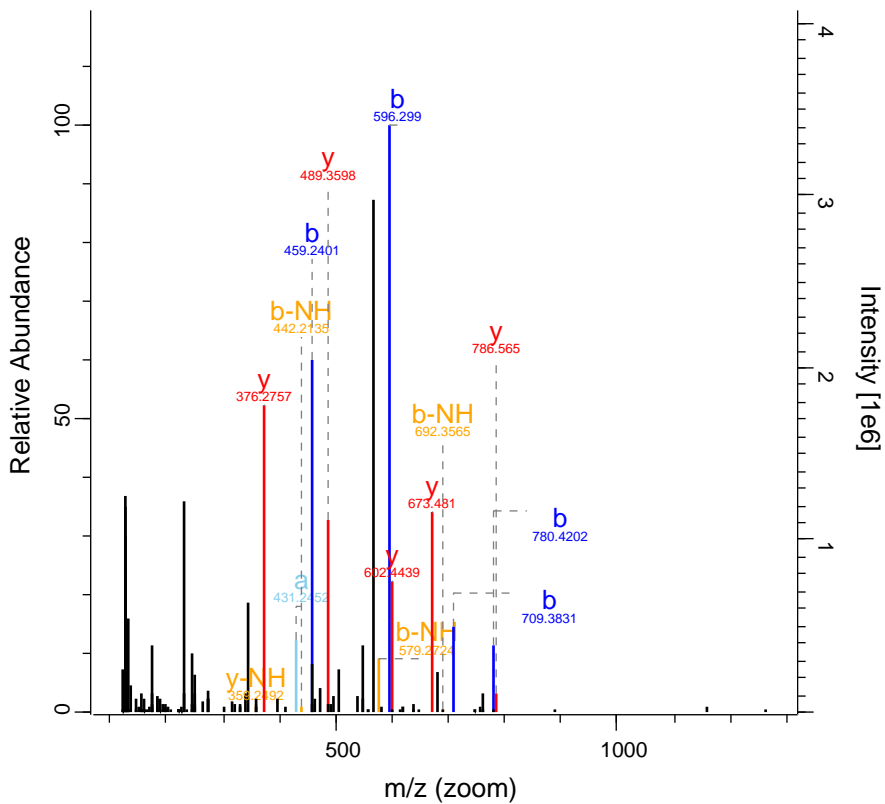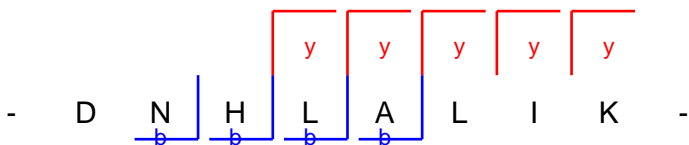

RO-QC-160121\_Z18 FTN 0141 USP17L1;USP17L24;USP17L20;USP17L19;USP17L17;USP1

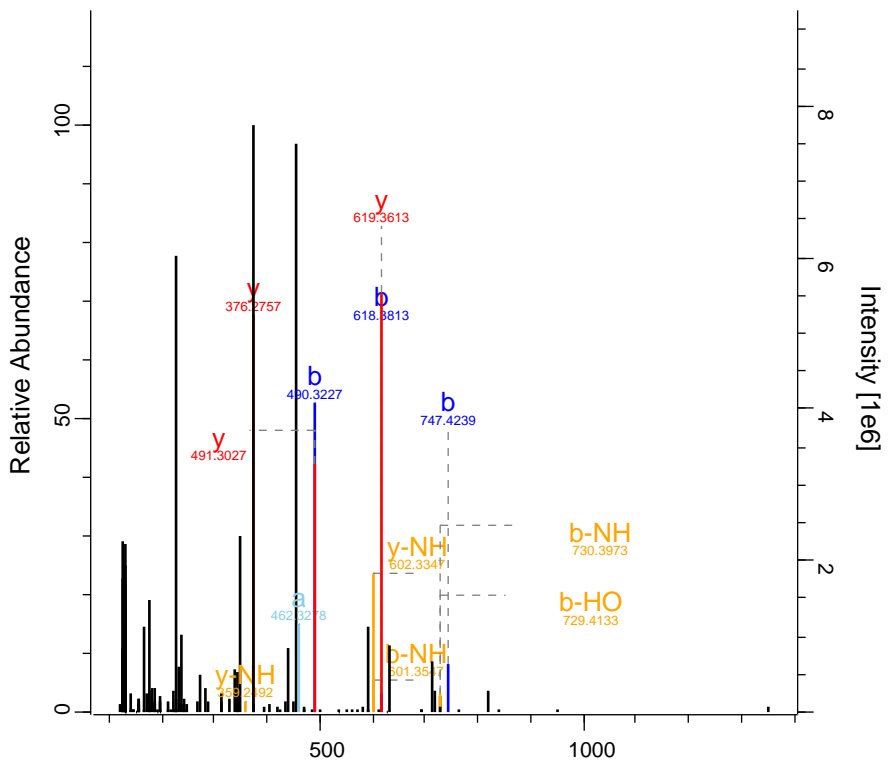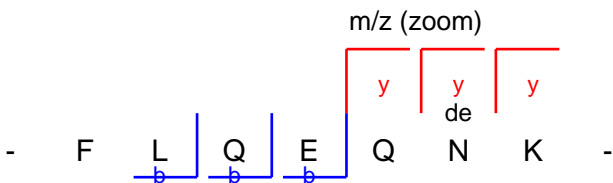

RO-QC-160121\_ZackD\_SS\_Set\_02\_Fractio 18789 FTMS; HC 227.94 806.91 YIPF6

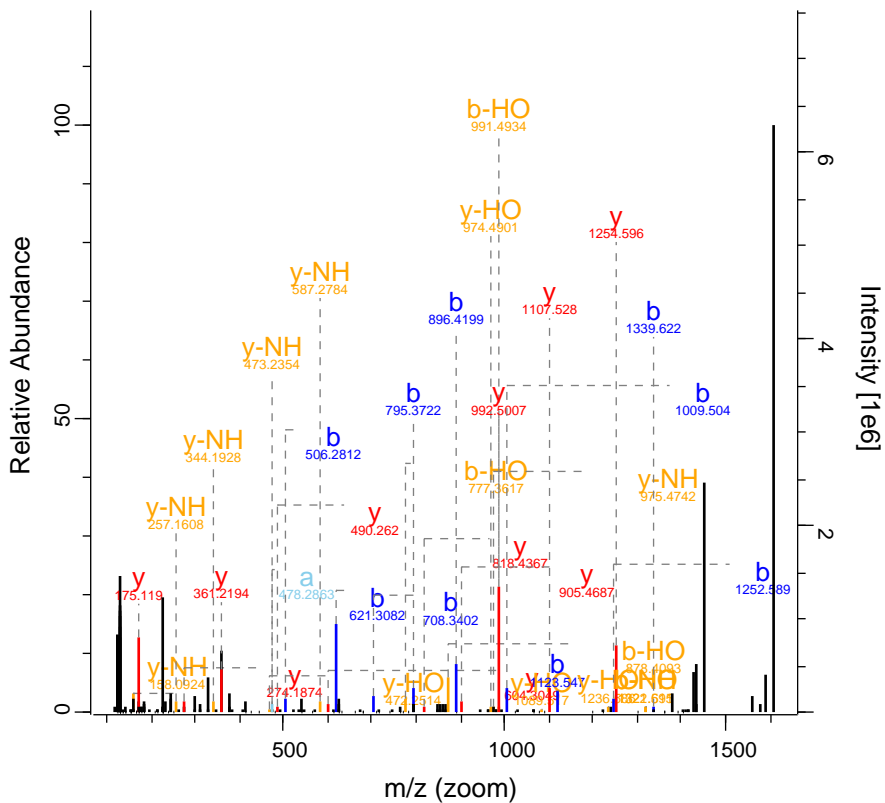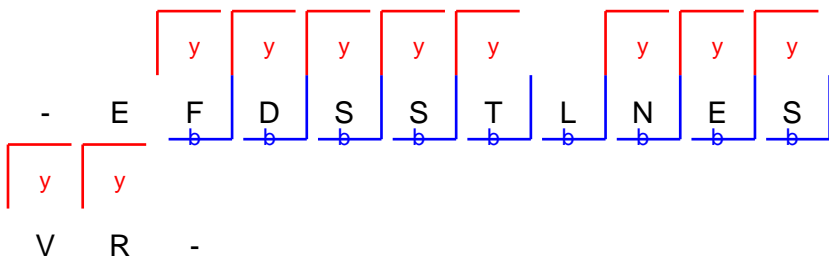

RO-QC-160121\_ZackD\_SS\_Set\_02\_Fraction 18878 FTMS; HC 90.7 538.27 YIPF6

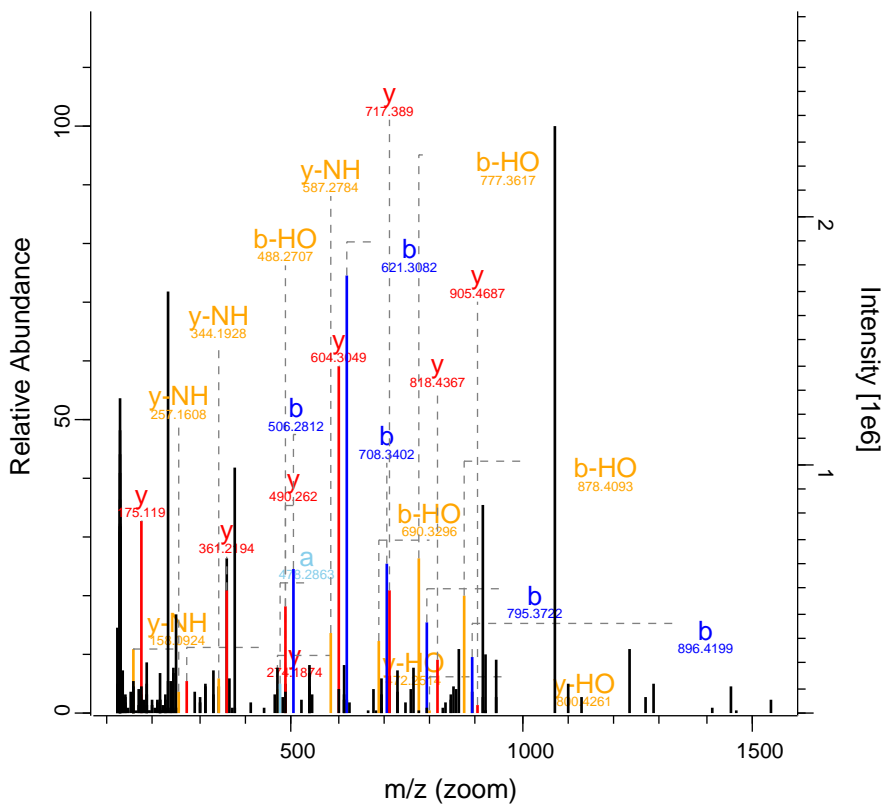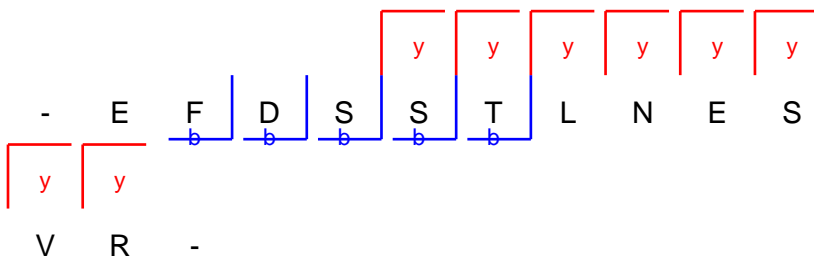

RO-QC-160121\_ZackD\_SS\_Set\_02\_Fractio 19058 FTMS; HC 105.35 748.88 CES2

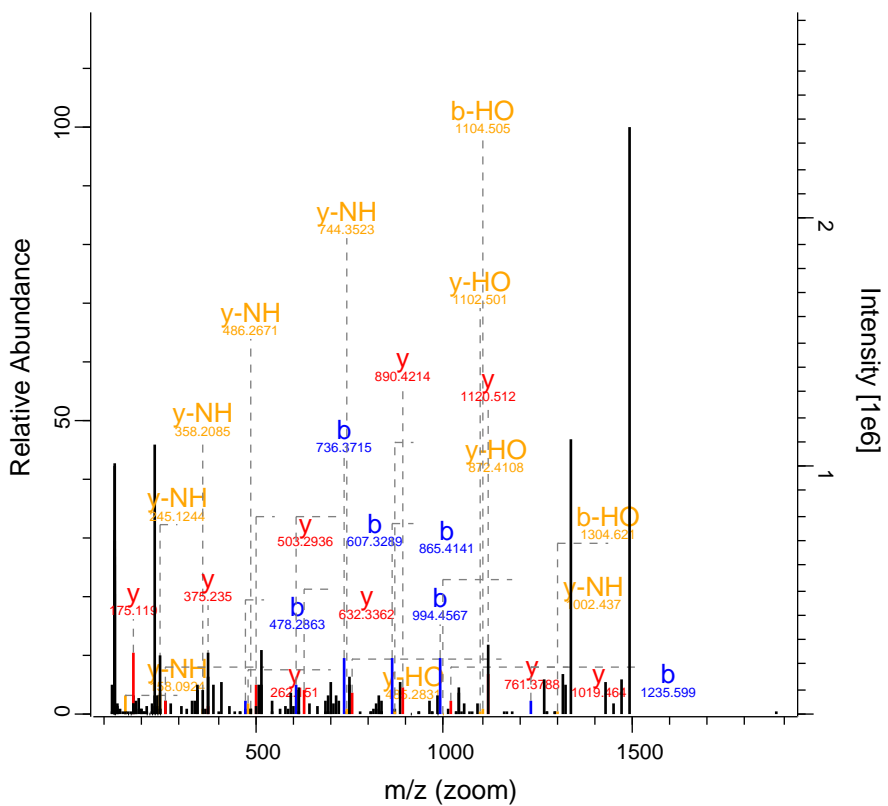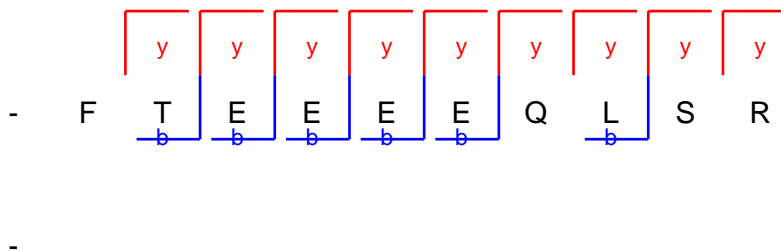



RO-QC-160121\_ZackD\_SS\_Set\_02\_Fraction 19320 FTMS; HC 46.43 817.77 RTTN

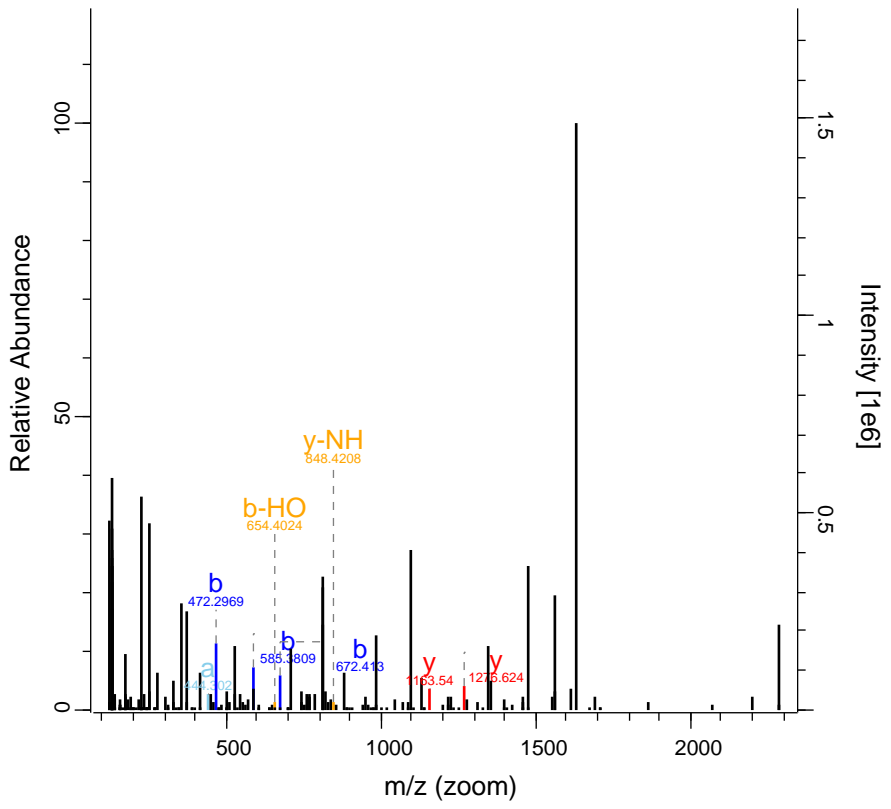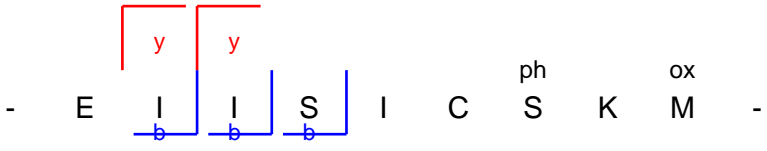

| Raw File                                | Scan  | Method    | Score | m/z    |
|-----------------------------------------|-------|-----------|-------|--------|
| RO-QC-160121_ZackD_SS_Set_02_Fraction_6 | 19398 | FTMS; HCD | 73.04 | 429.94 |

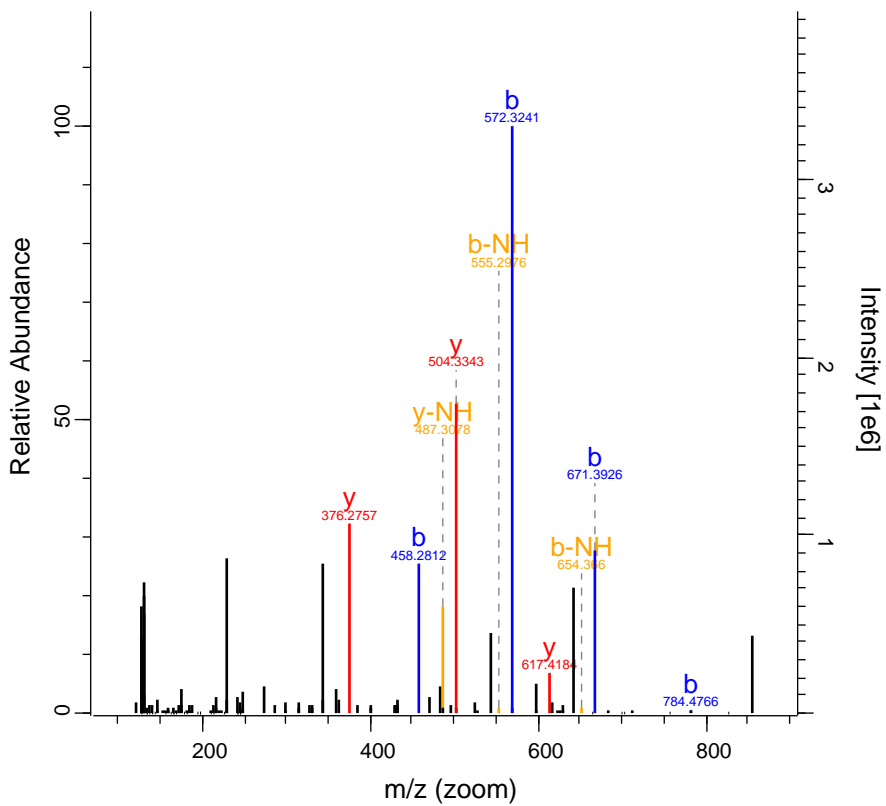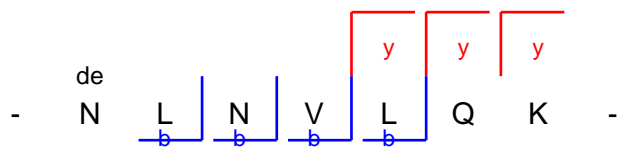

RO-QC-160121\_ZackD\_SS\_Set\_02\_Fractio 19425 FTMS; HC 103.56 743.89 KLHL7

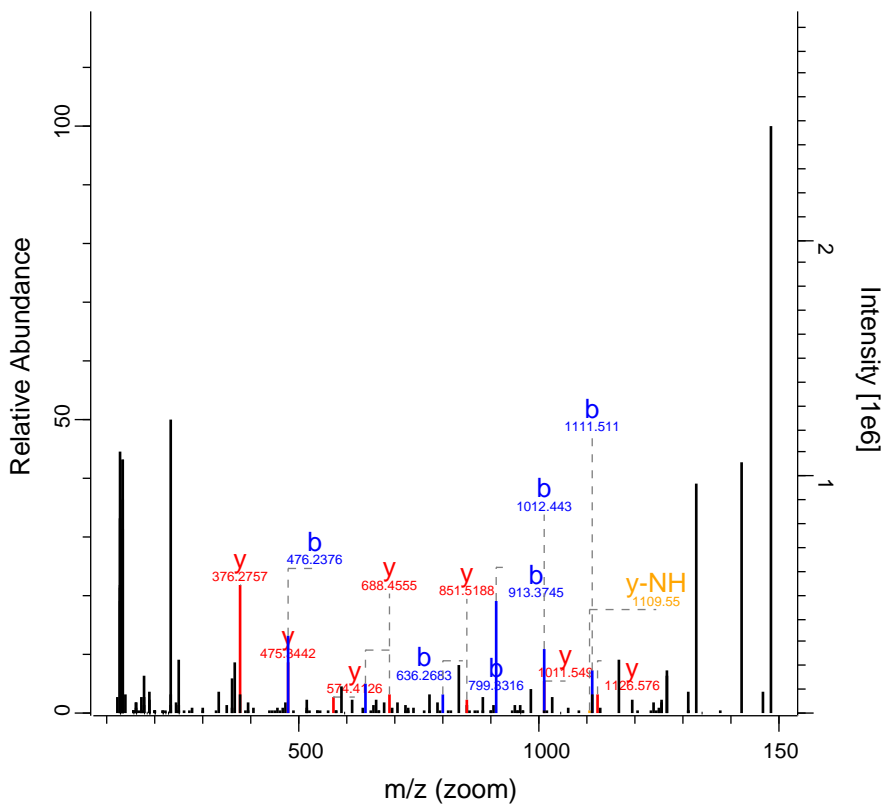

m/z (zoom)

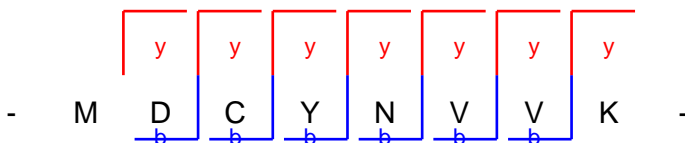

RO-QC-160121\_ZackD\_SS\_Set\_02\_Fraction 19460 FTMS; HC 50.56 755.07 GIMAP7

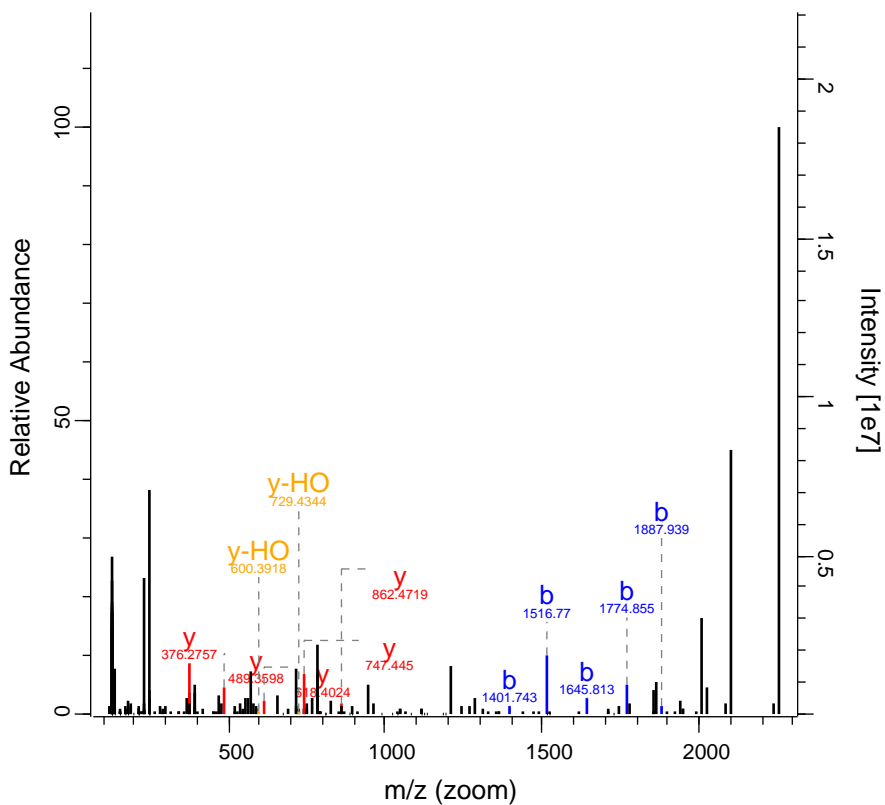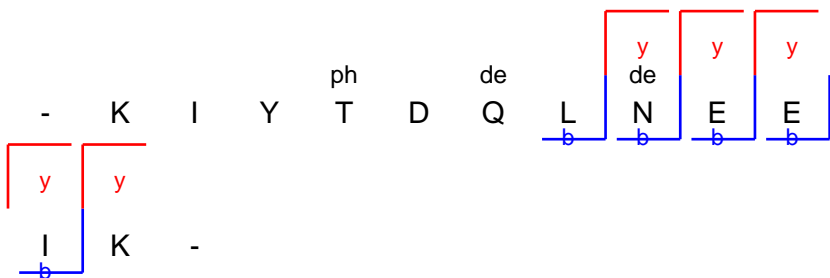

RO-QC-160121\_ZackD\_SS\_Set\_02\_Fraction 19945 FTMS; HC 77.79 813.45 DDIT3

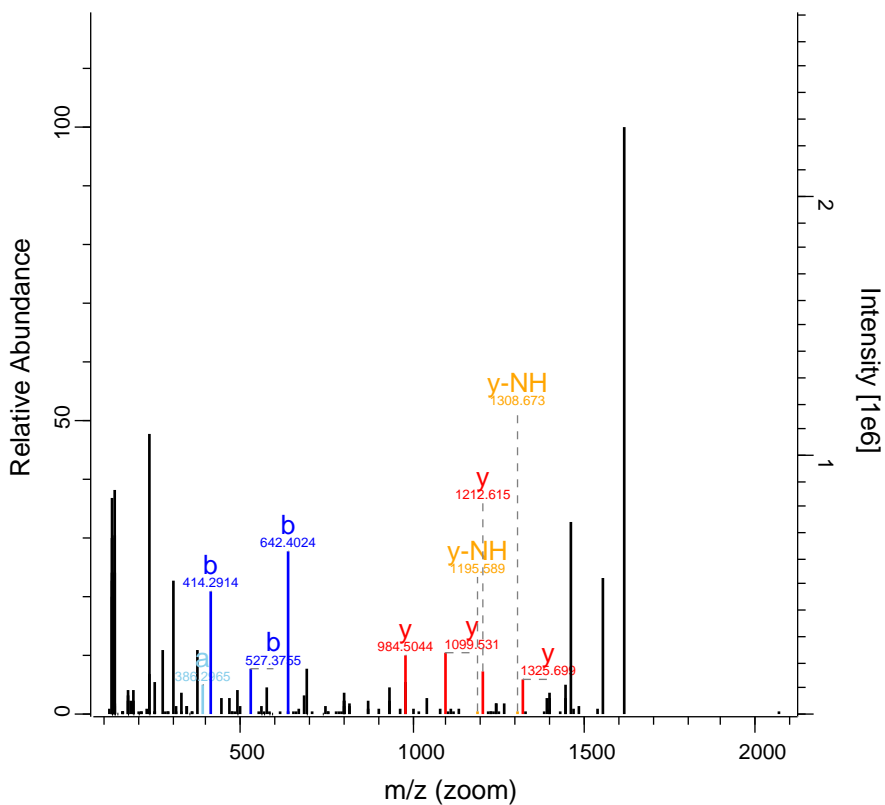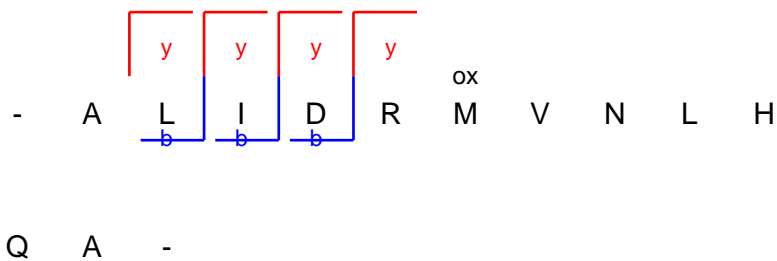

RO-QC-160121\_ZackD\_SS\_Set\_02\_Fractic 20674 FTMS; HC 42.79 1264.15 FSCN3

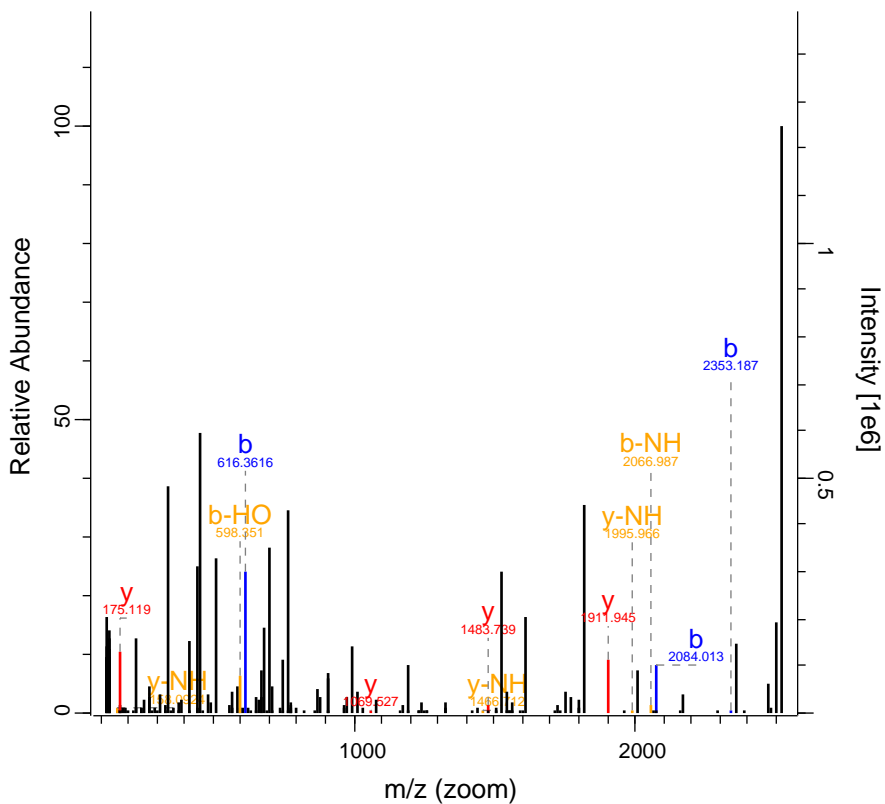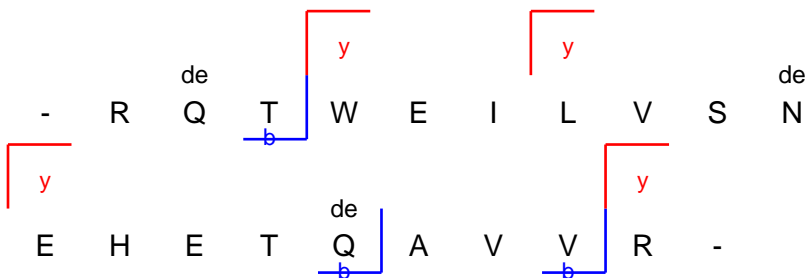

RO-QC-160121\_ZackD\_SS\_Set\_02\_Fraction 20802 FTMS; HC 83.36 652.03 SLC25A17

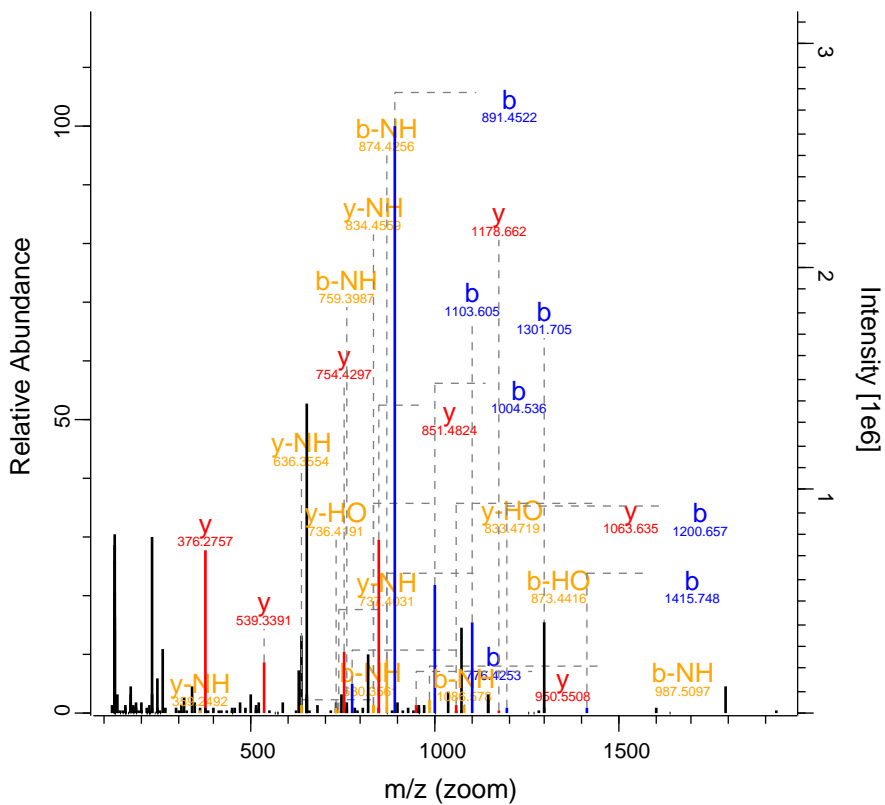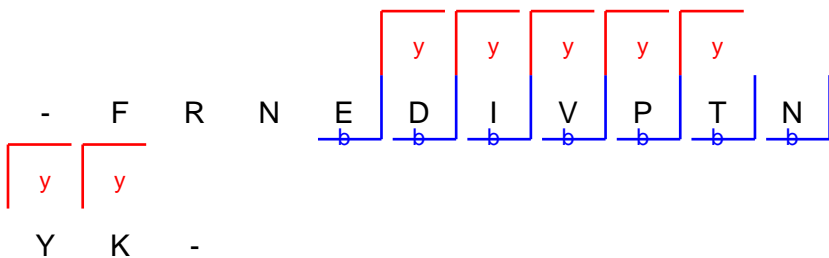

Y K -

RO-QC-160121\_ZackD\_SS\_Set\_02\_Fractio 21093 FTMS; HC 159.58 935.47 NUDT6

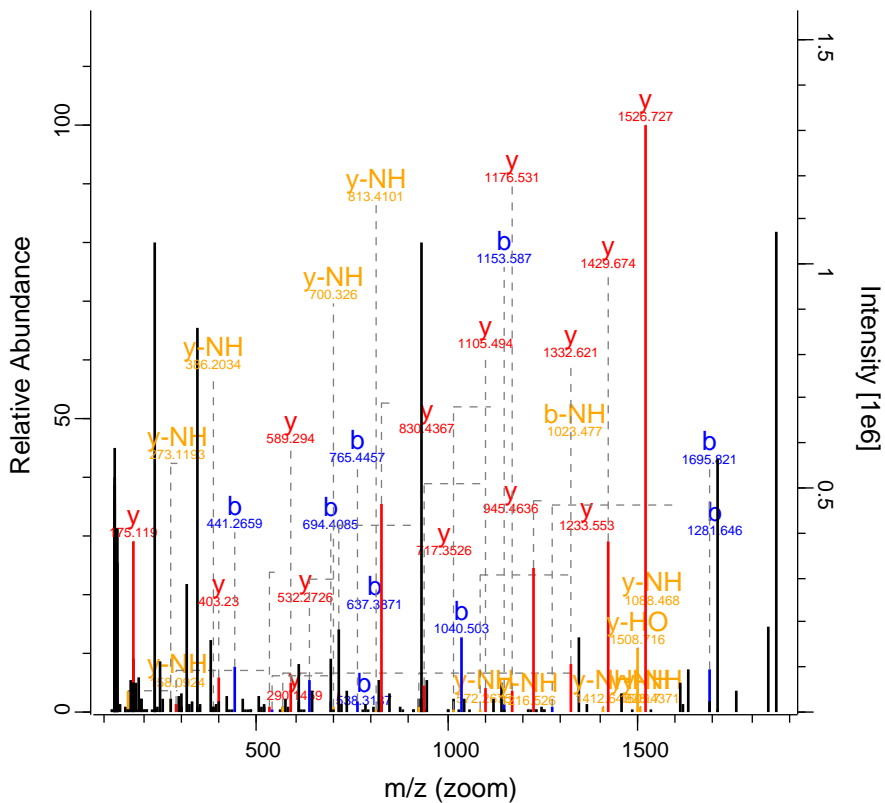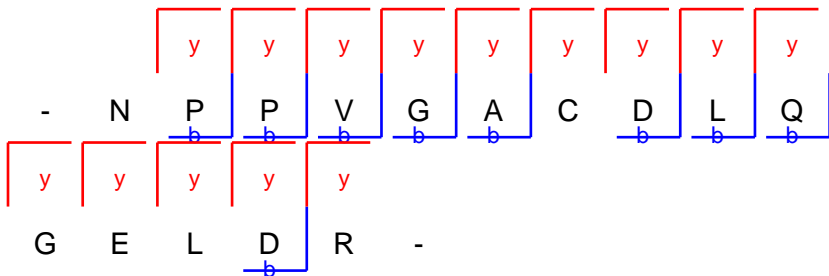



RO-QC-160121\_ZackD\_SS\_Set\_02\_Fractic 22375 FTMS; HC 116.24 1191.14 ATP6V0C

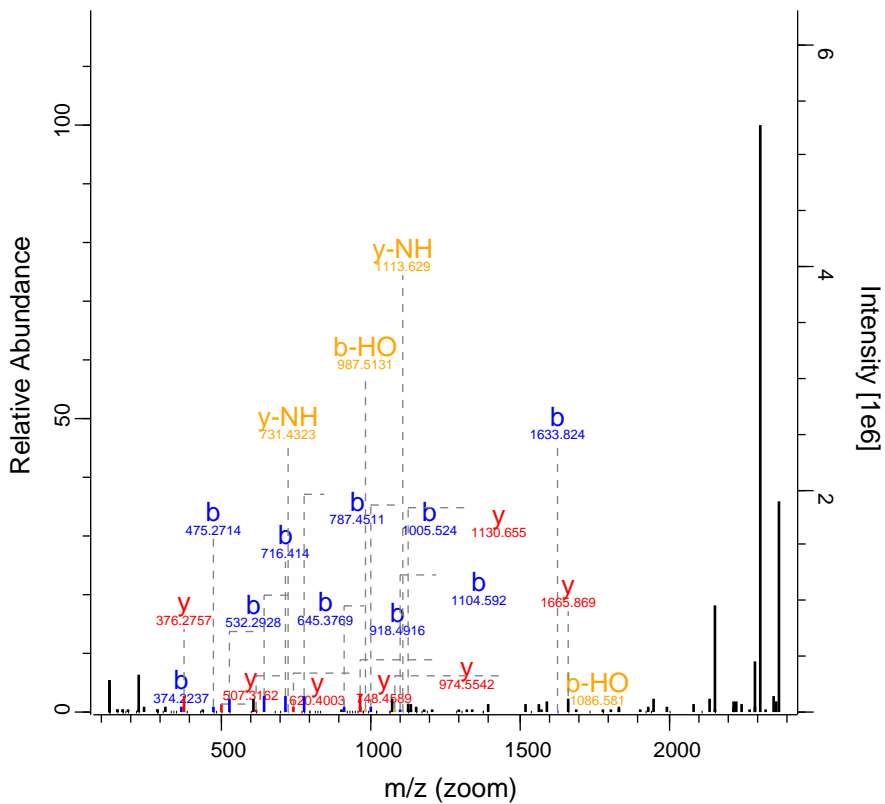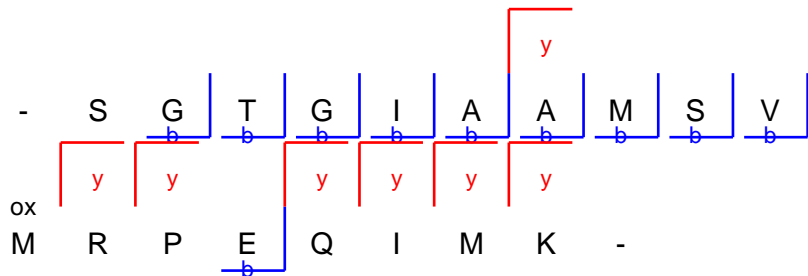

RO-QC-160121\_ZackD\_SS\_Set\_02\_Fraction 22394 FTMS; HC 128 600.86 TMEM167A

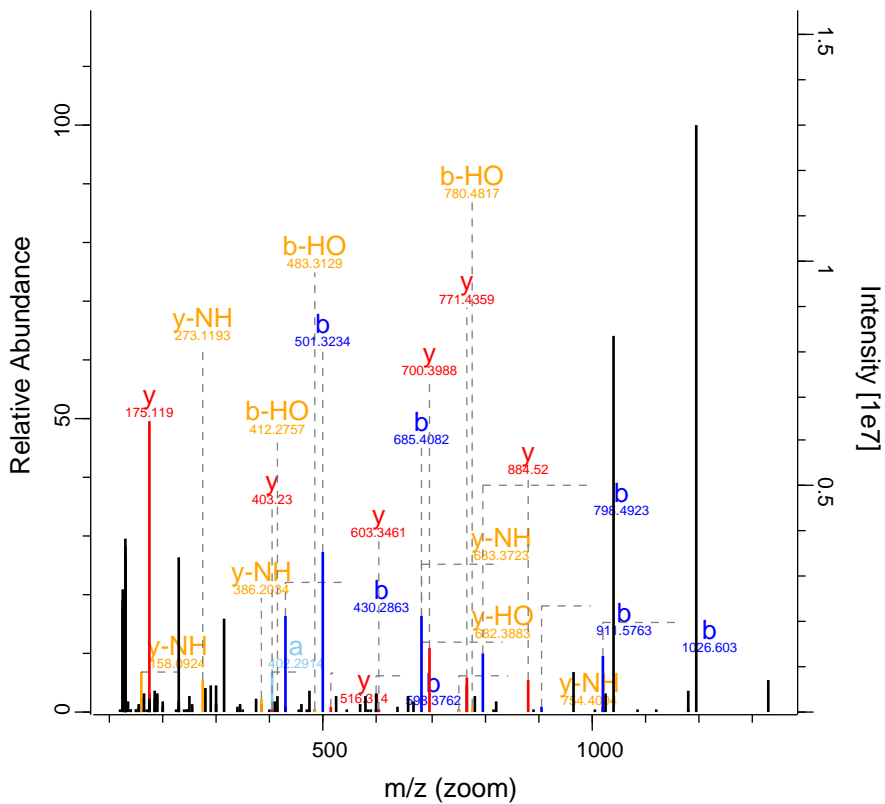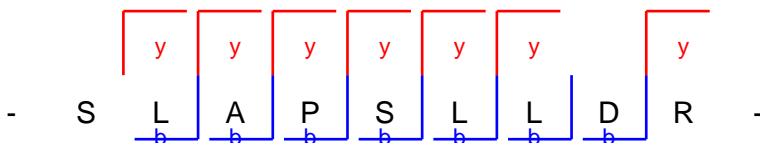



RO-QC-160121\_ZackD\_SS\_Set\_02\_Fraction 22486 FTMS; HC 72.18 794.76 ATP6V0C

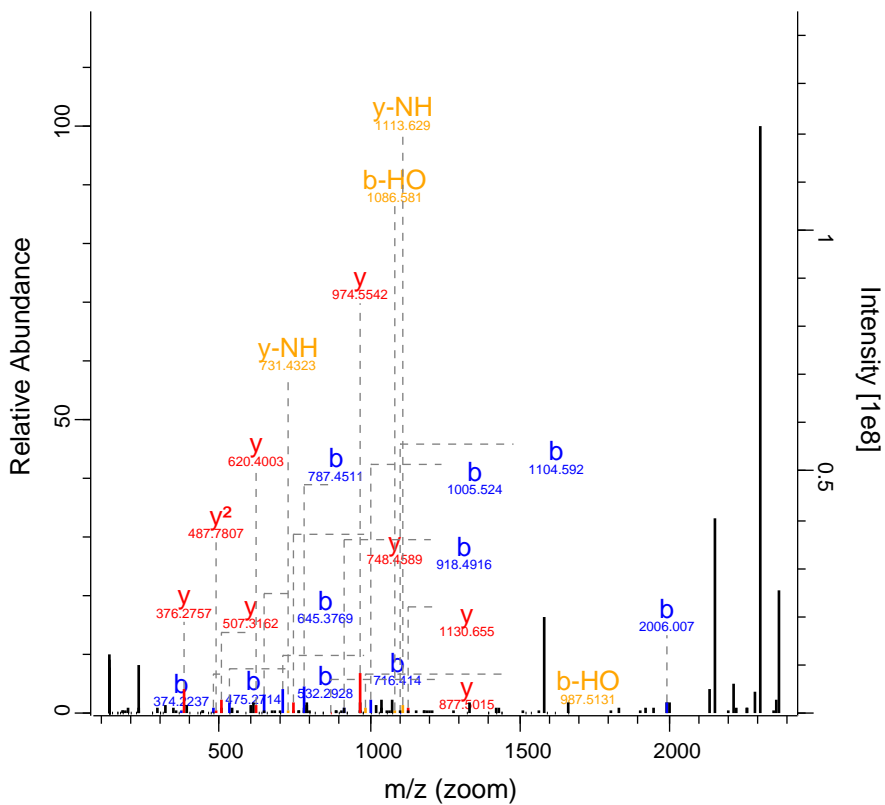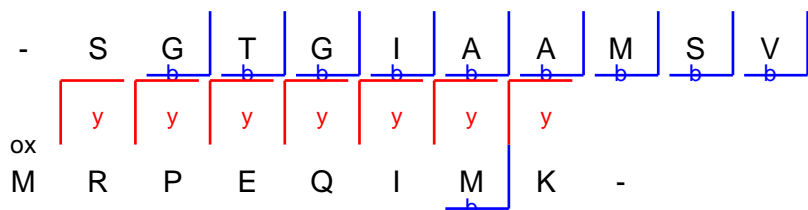

RO-QC-160121\_ZackD\_SS\_Set\_02\_Fraction 22996 FTMS; HCl 143.85 638.4 CABP7

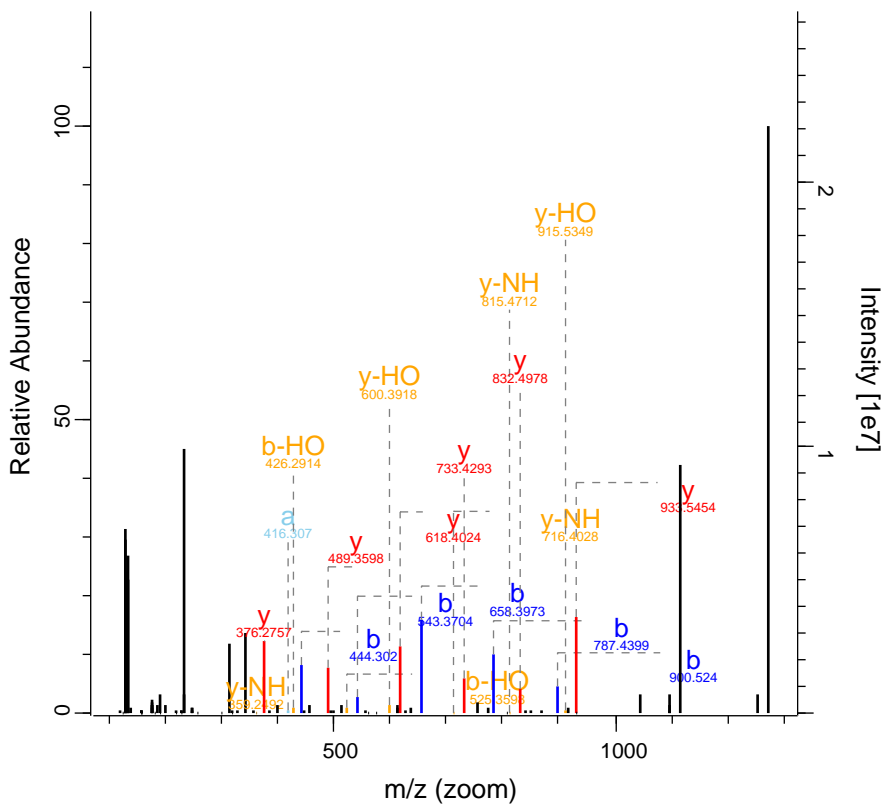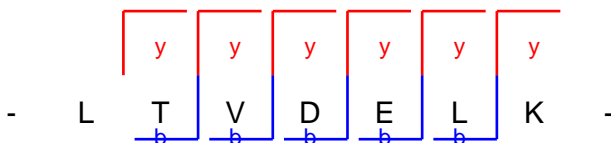

RO-QC-160121\_ZackD\_SS\_Set\_02\_Fraction 23140 FTMS; HC 38.96 459.61 PTPN21

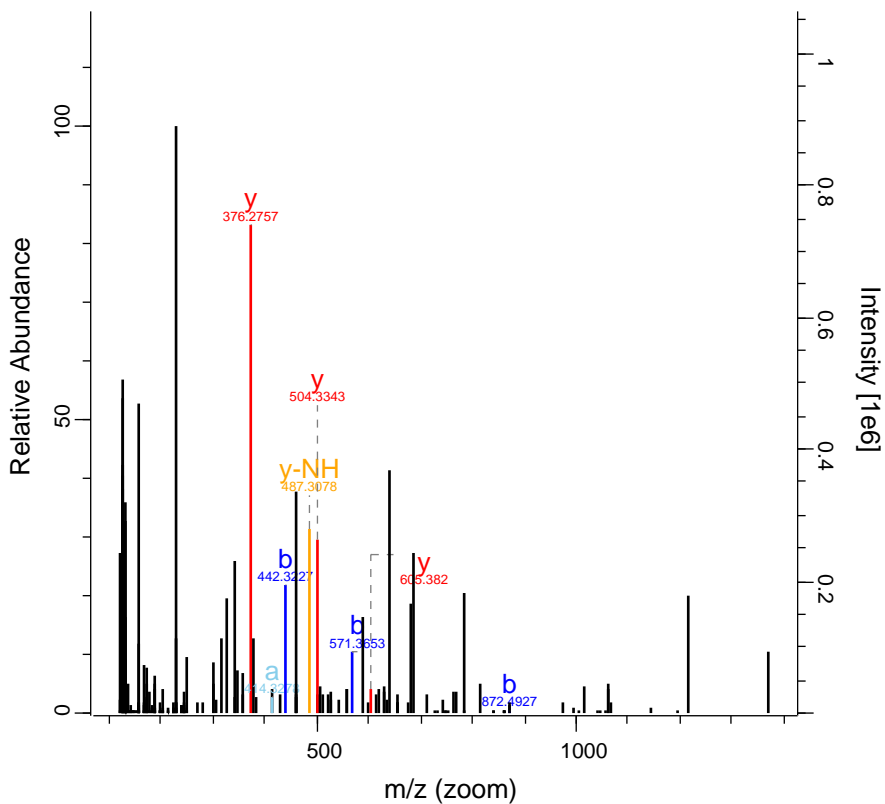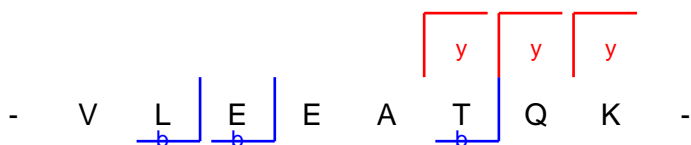

RO-QC-160121\_ZackD\_SS\_Set\_02\_Fraction 23171 FTMS; HC 87.28 425.94 CABP7

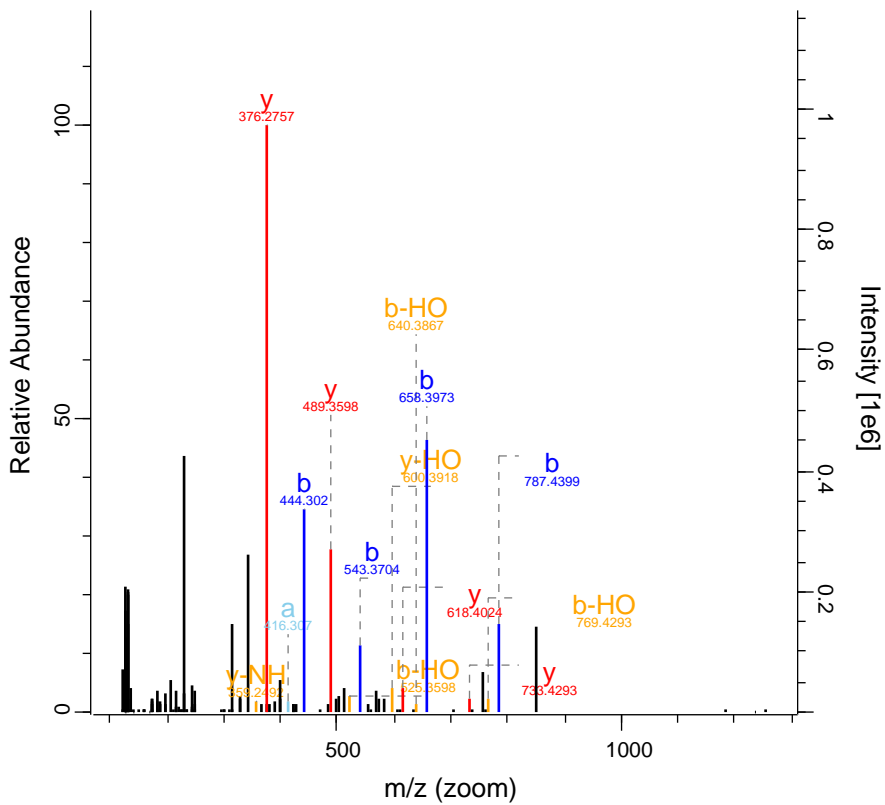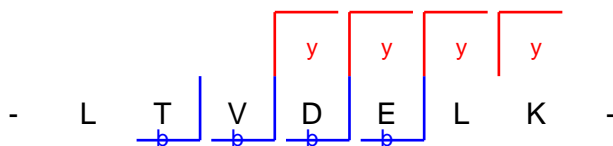

RO-QC-160121\_ZackD\_SS\_Set\_02\_Fraction 23202 FTMS; HCl 104.37 638.4 CABP7

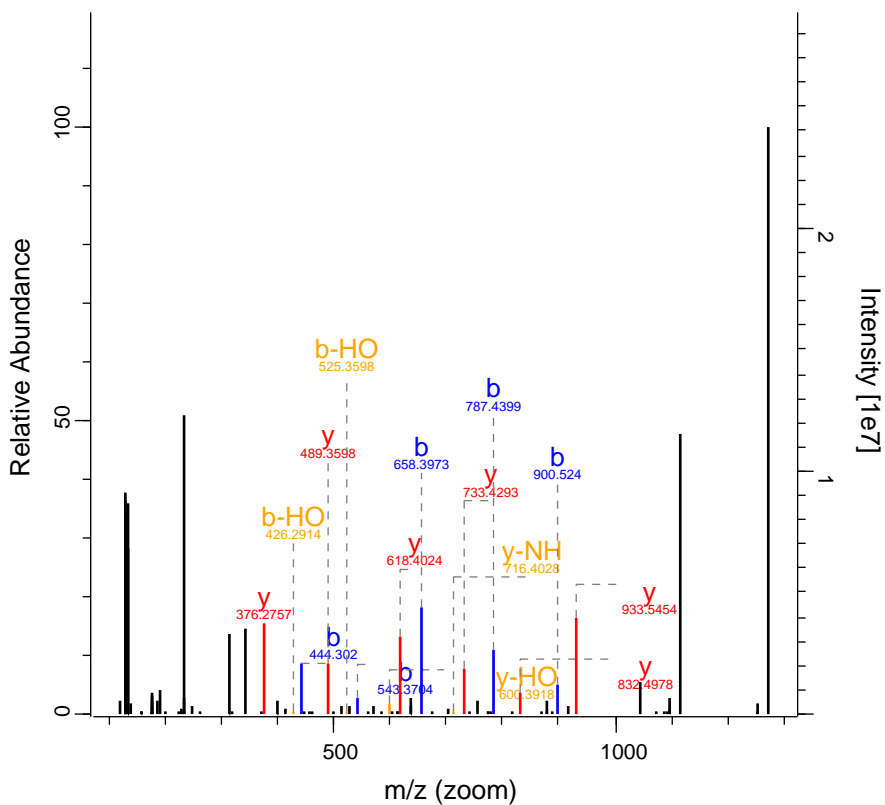



RO-QC-160121\_ZackD\_SS\_Set\_02\_Fractio 24677 FTMS; HC 104.79 905.42 ACTR6

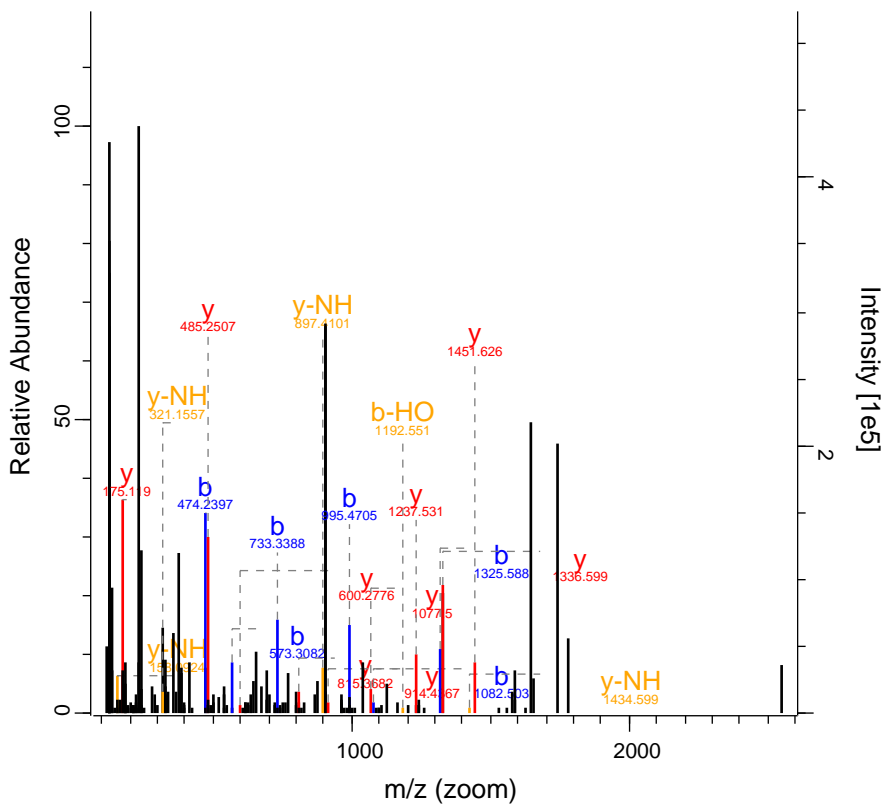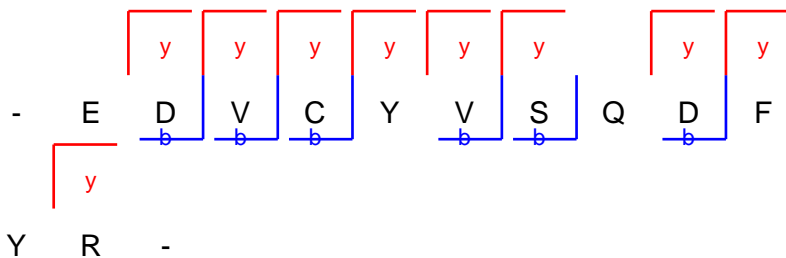

RO-QC-160121\_ZackD\_SS\_Set\_02\_Fractic 24933 FTMS; HC 43.68 1209.06 LUZP4

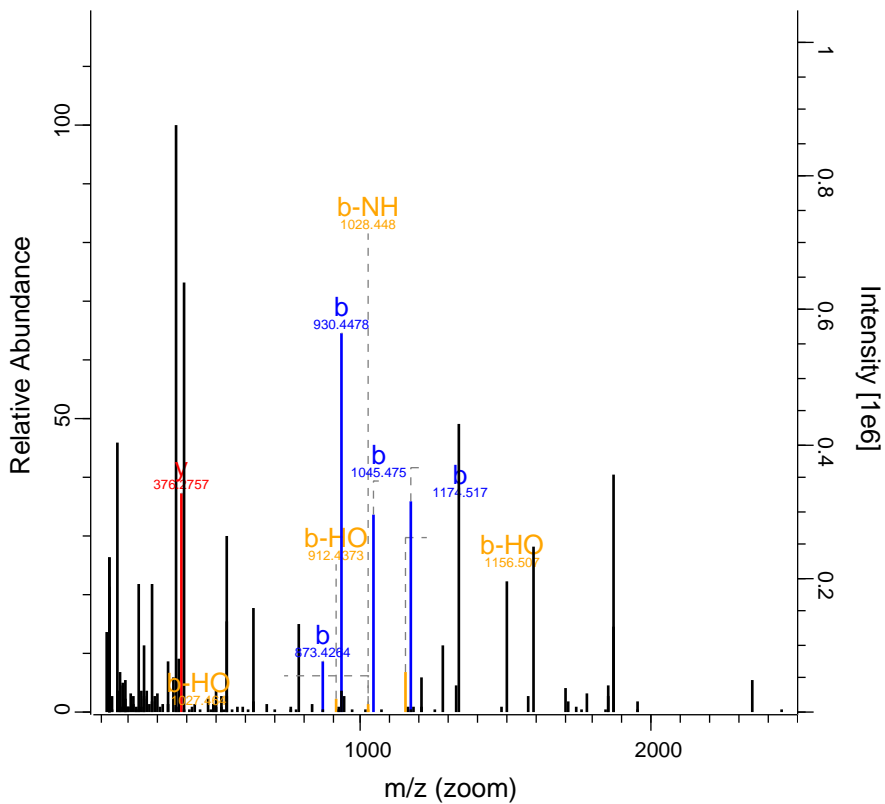

- N Q G Q S E G N Q H  
 de Q S E G N P D K -

Fragmentation diagram showing peptide sequence: - N Q G Q S E G N Q H. The diagram illustrates the b and y ion series. Blue lines indicate b-ion series (b1, b2, b3, b4) and y-ion series (y1, y2, y3, y4). A red line indicates a y-ion series (y1) from the E-G peptide.

RO-QC-160121\_ZackD\_SS\_Set\_02\_Fractio 25587 FTMS; HC 168.74 893.47 MRPL35

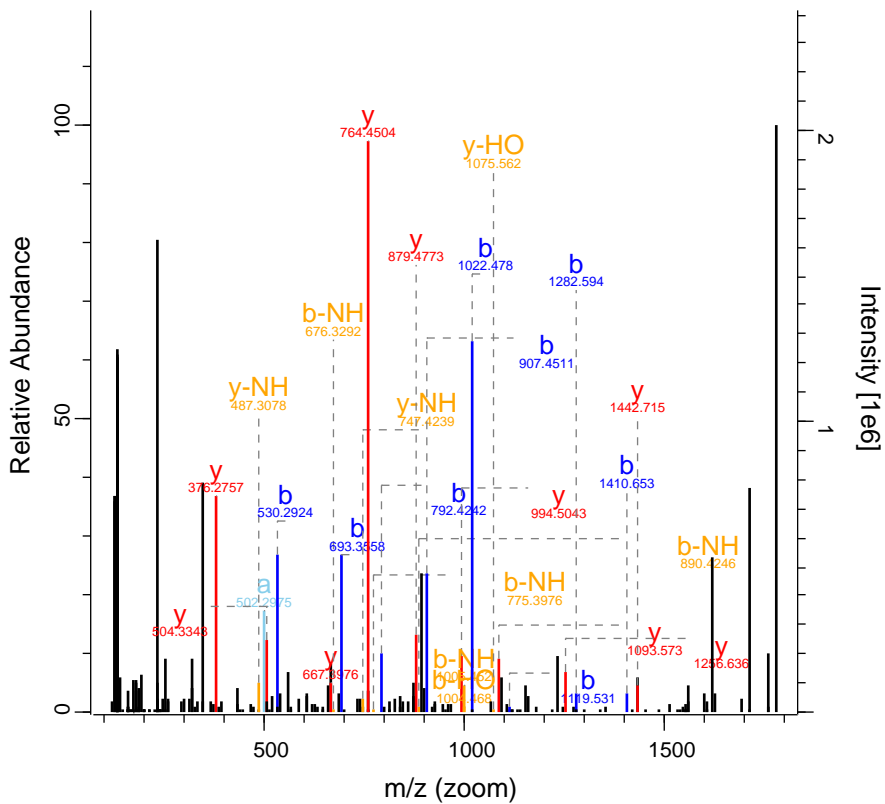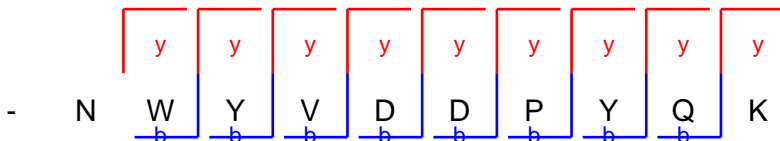

RO-QC-160121\_ZackD\_SS\_Set\_02\_Fraction 25605 FTMS; HC 51.09 596.31 MRPL35

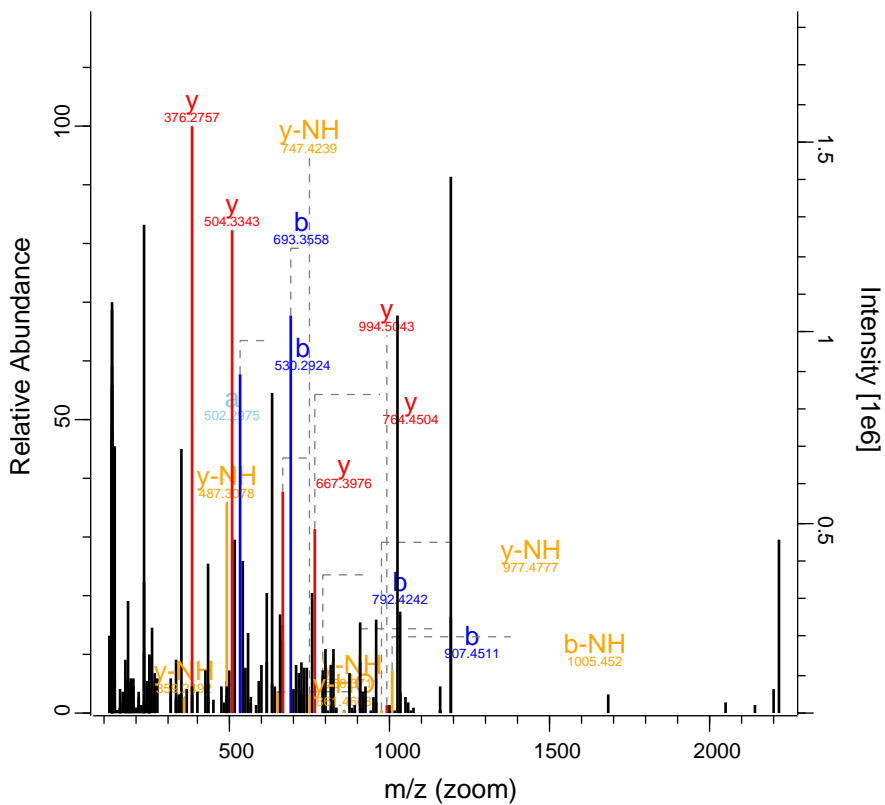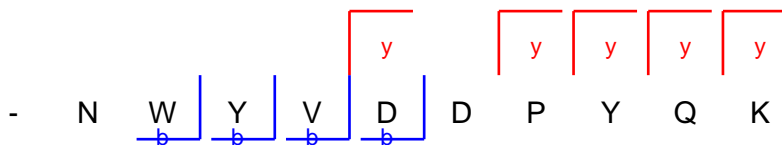

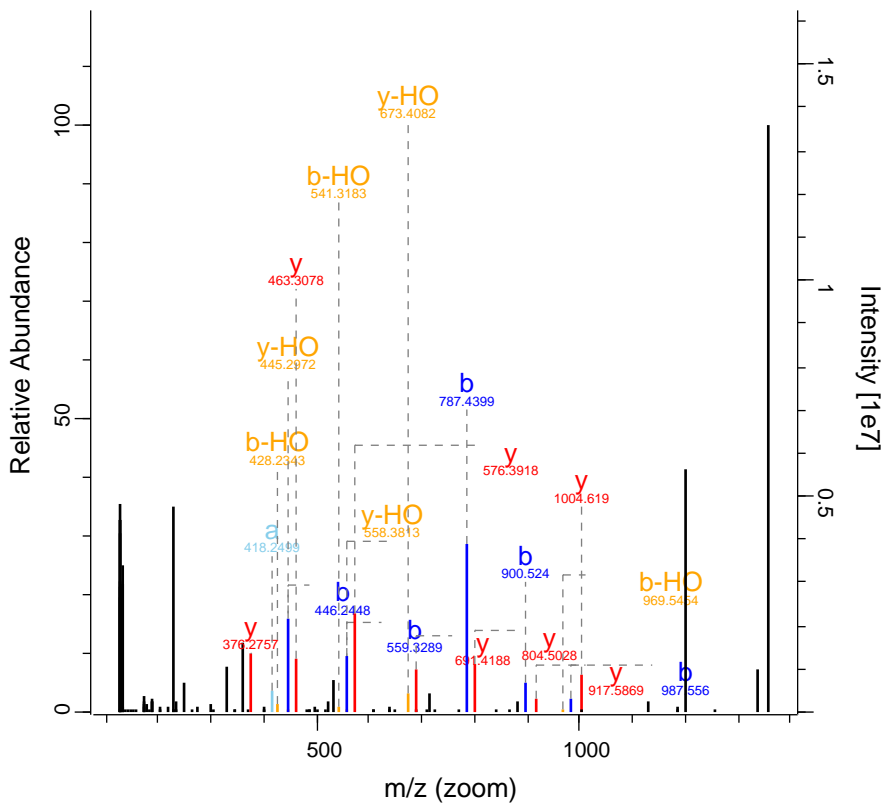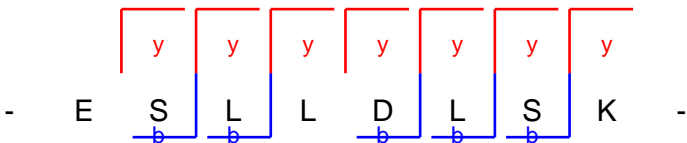

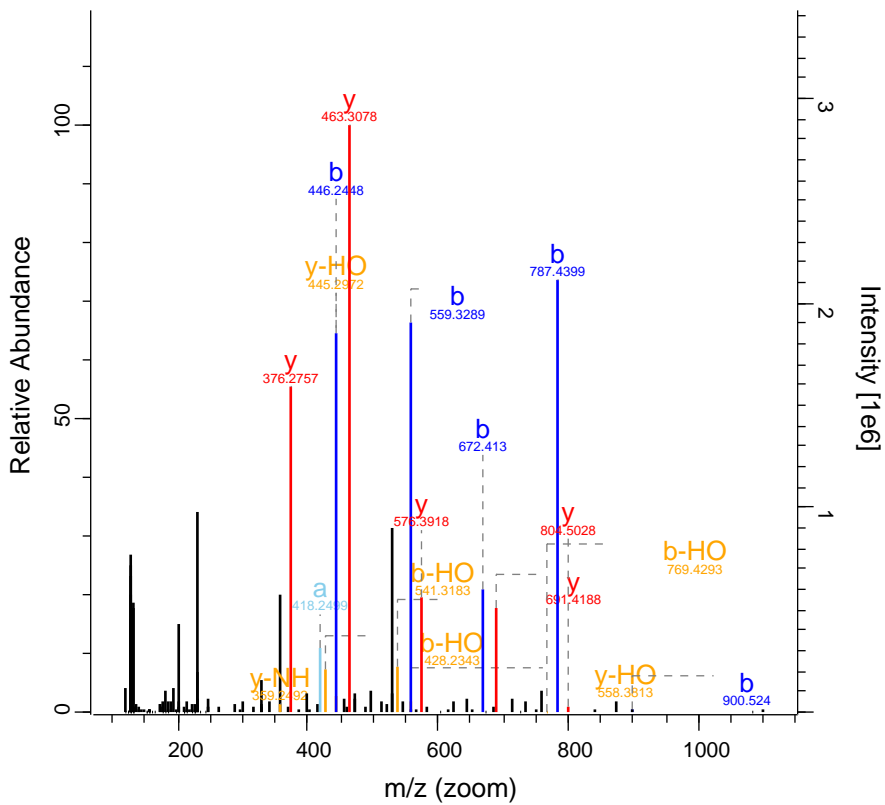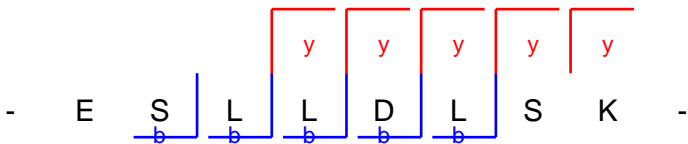

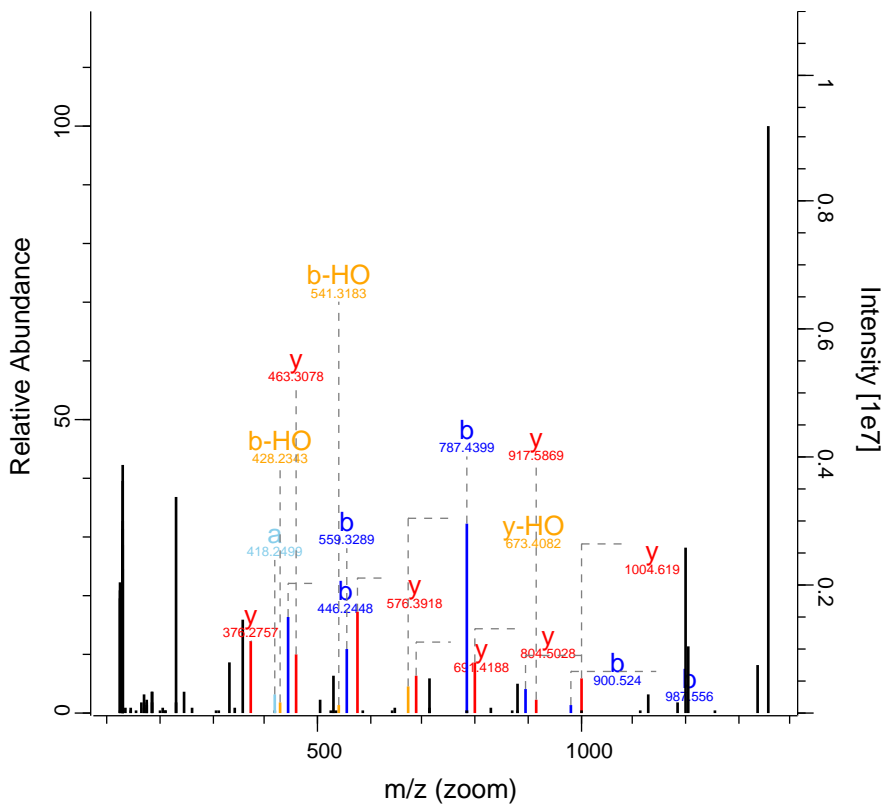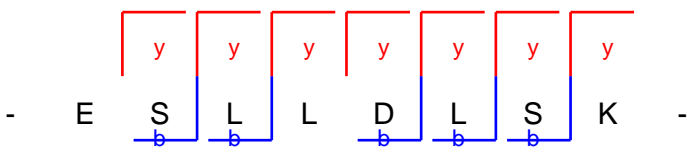

RO-QC-160121\_ZackD\_SS\_Set\_02\_Fraction 26569 FTMS; HC 86.09 405.21 SCTR

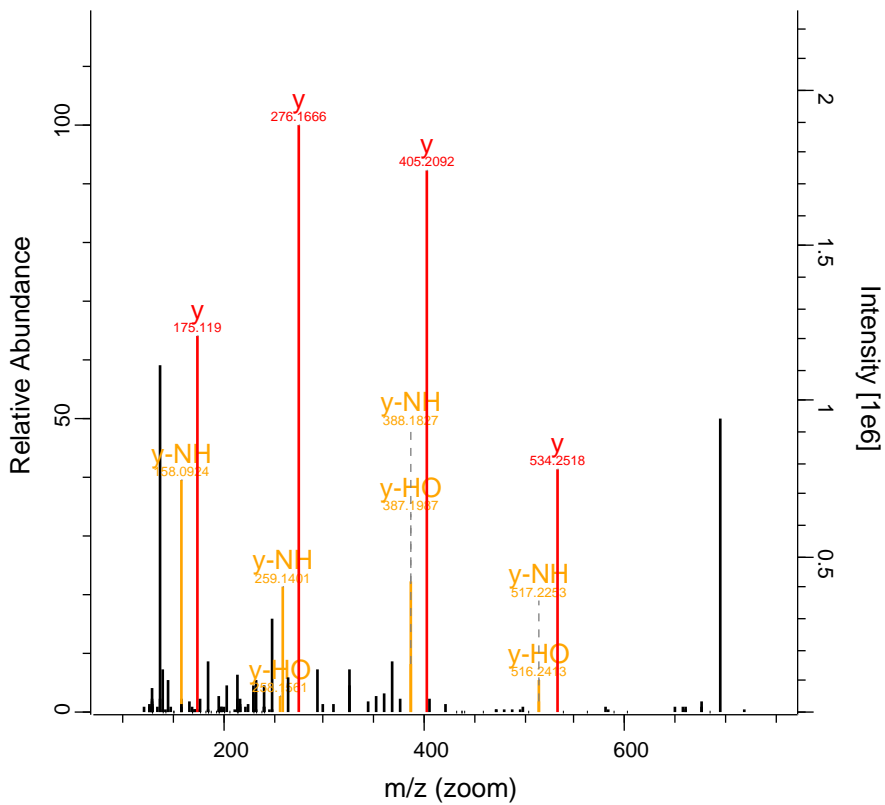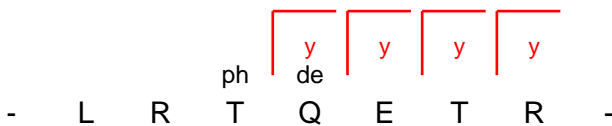



RO-QC-160121\_ZackD\_SS\_Set\_02\_Fractio 28116 FTMS; HC 100.42 612.85 MELK

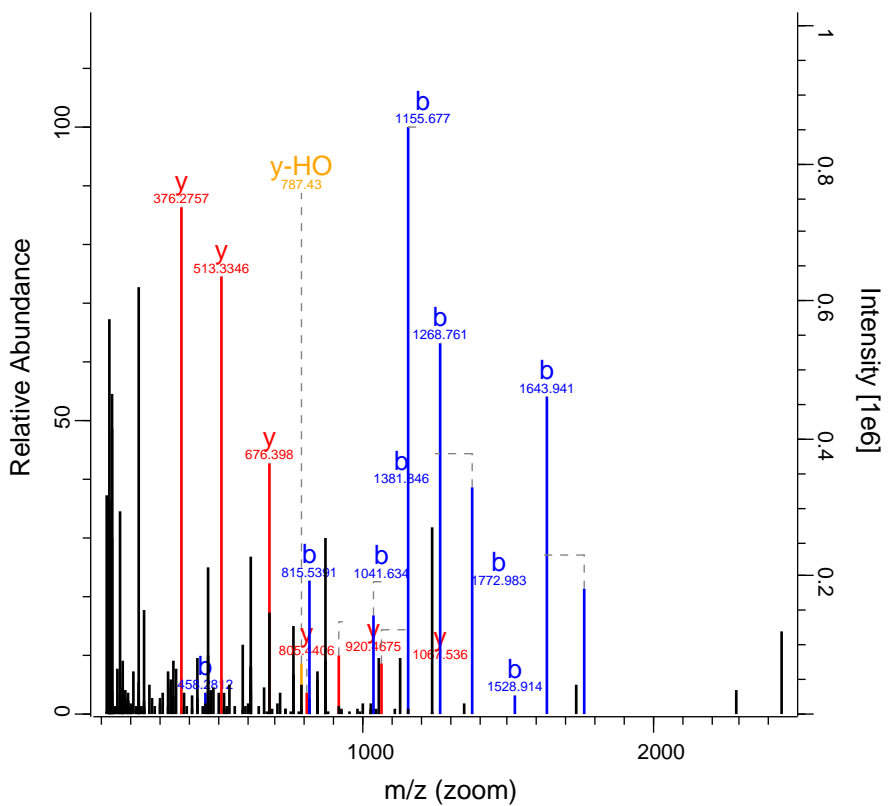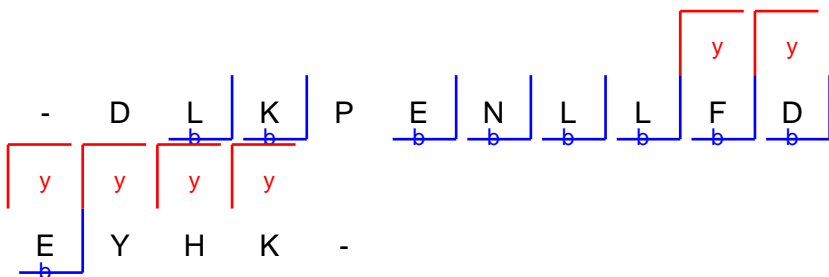

RO-QC-160121\_ZackD\_SS\_Set\_02\_Fratio 29156 FTMS; HC 102.52 585.66 GSKIP

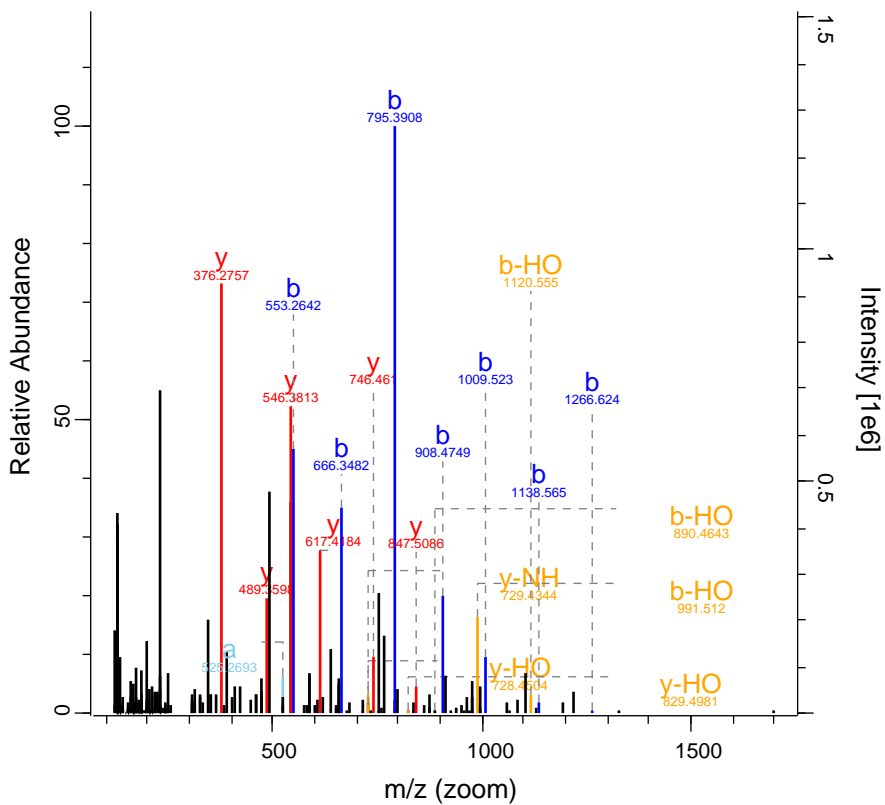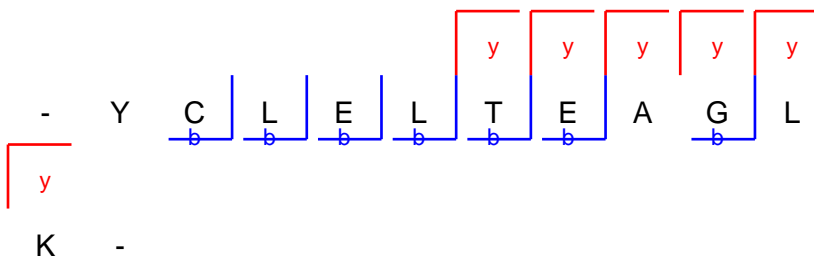

RO-QC-160121\_ZackD\_SS\_Set\_02\_Fraction 29166 FTMS; HC 179.1 877.99 GSKIP

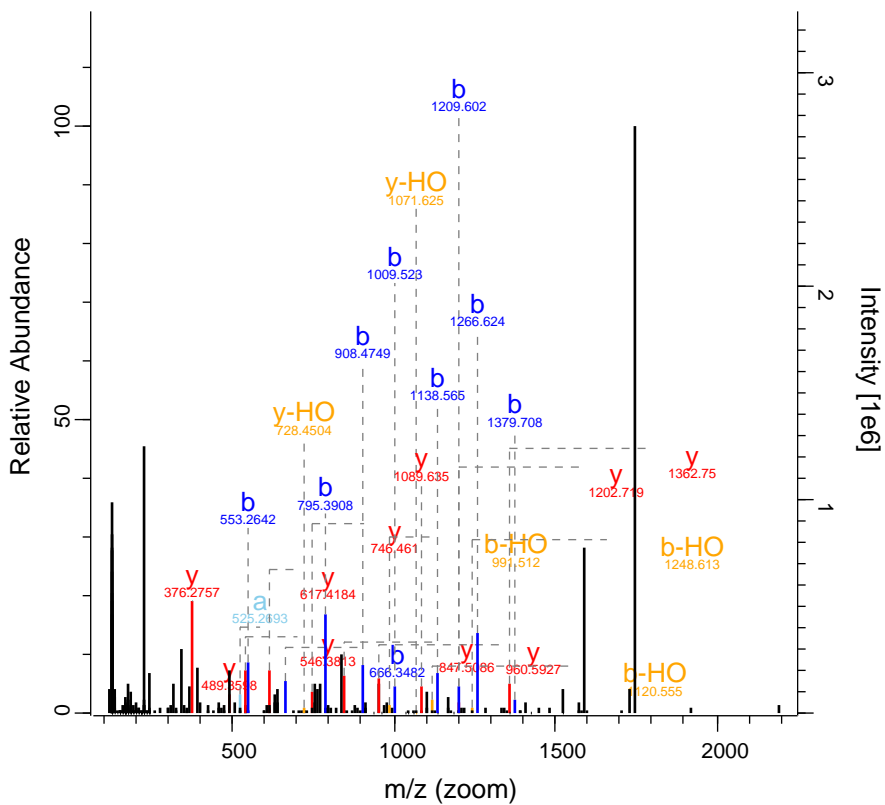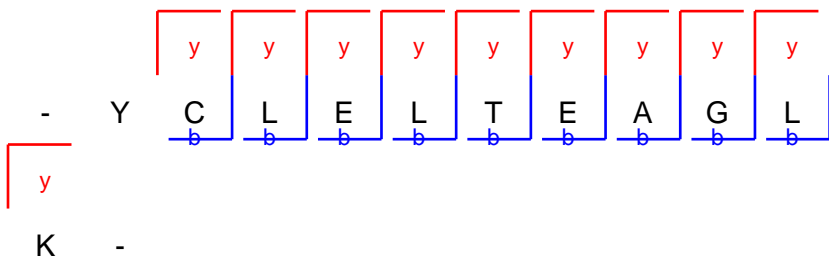

RO-QC-160121\_ZackD\_SS\_Set\_02\_Fractio 29354 FTMS; HC 111.46 682.88 MT-CYB

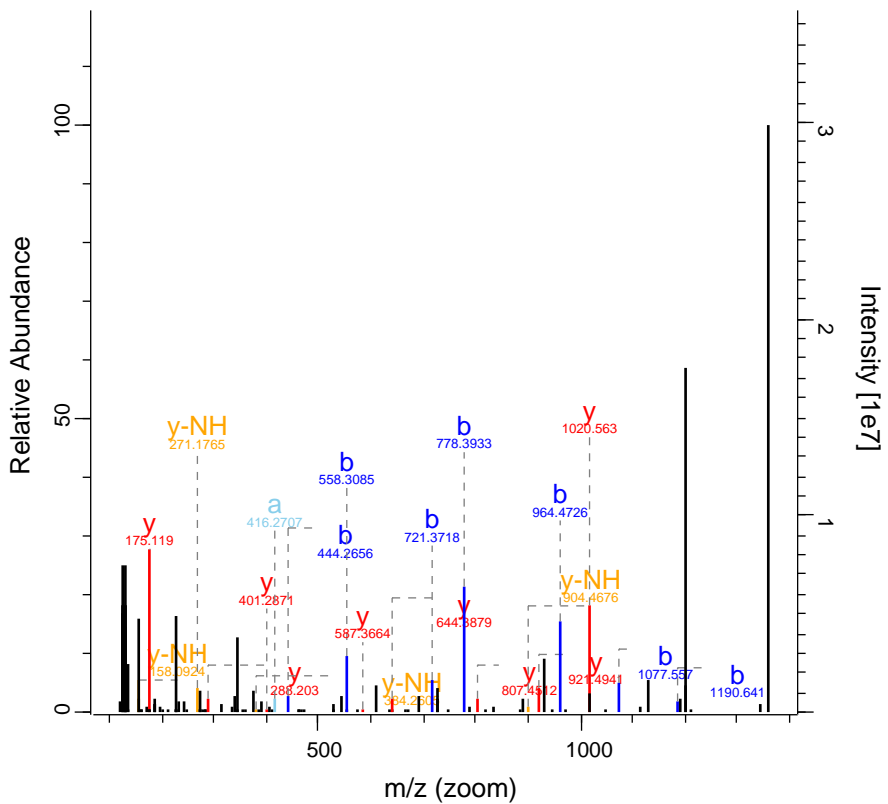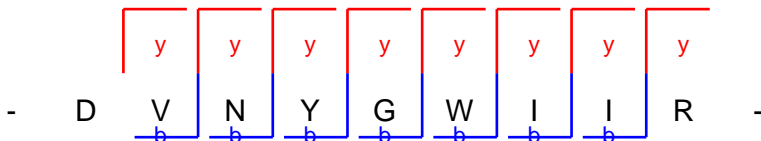

RO-QC-160121\_ZackD\_SS\_Set\_02\_Fractio 29615 FTMS; HC 136.04 841.42 CNIH4

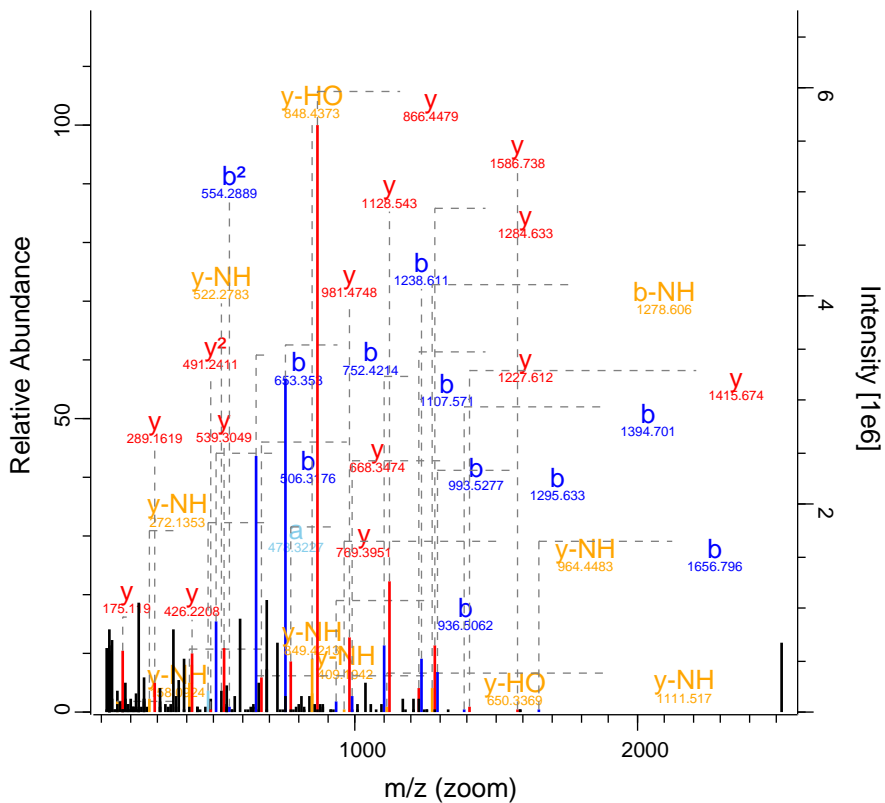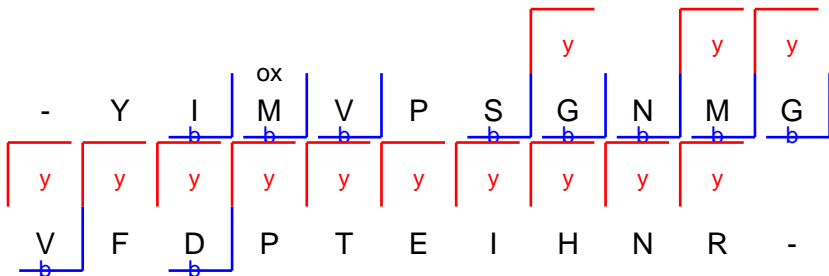

RO-QC-160121\_ZackD\_SS\_Set\_02\_Fractio 29815 FTMS; HC 137.69 841.75 CNIH4

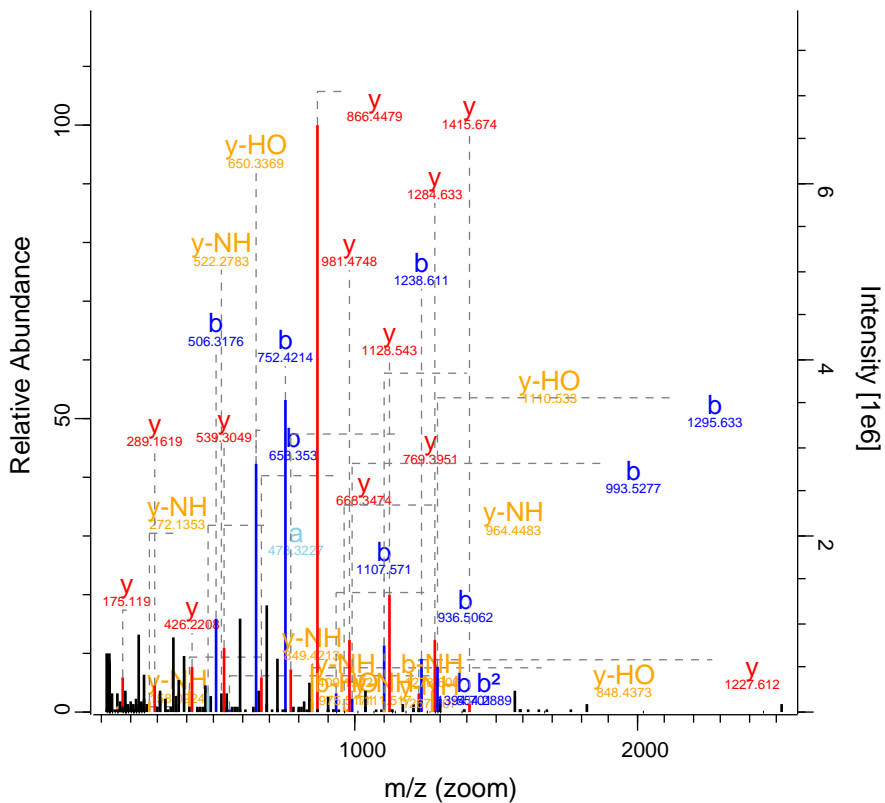

RO-QC-160121\_ZackD\_SS\_Set\_02\_Fractio 29892 FTMS; HC 140.82 655.38 ALKBH8

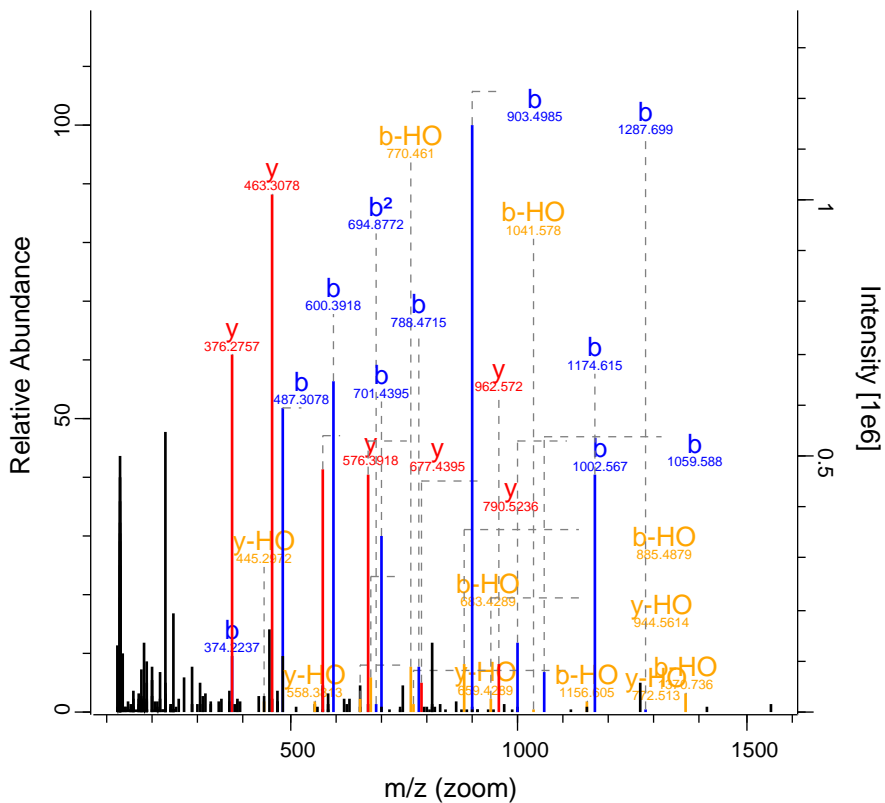

RO-QC-160121\_ZackD\_SS\_Set\_02\_Fractio 29969 FTMS; HC 117.86 946.51 POP7

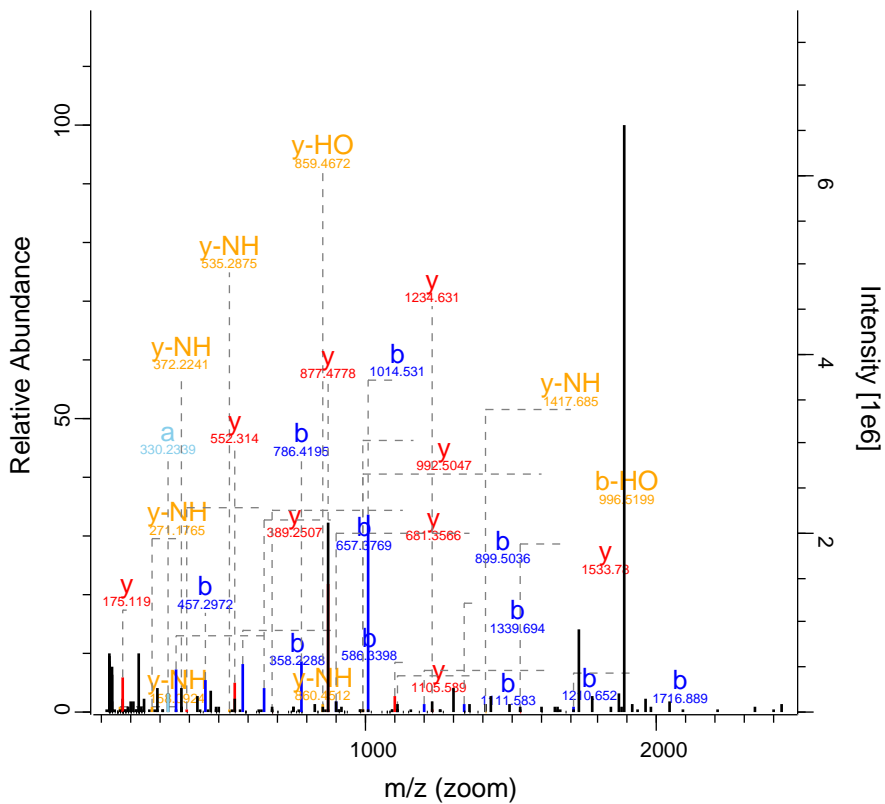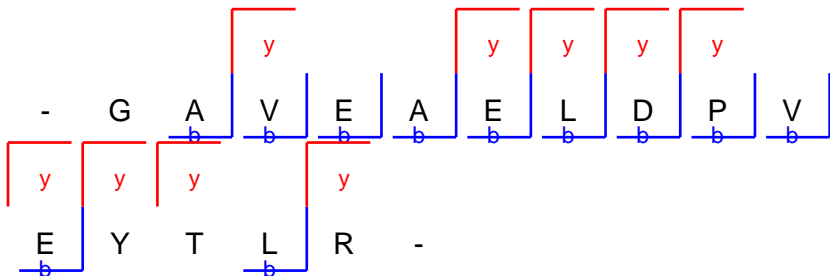



RO-QC-160121\_ZackD\_SS\_Set\_02\_Fraccio 29979 FTMS; HC 244.18 946.01 POP7

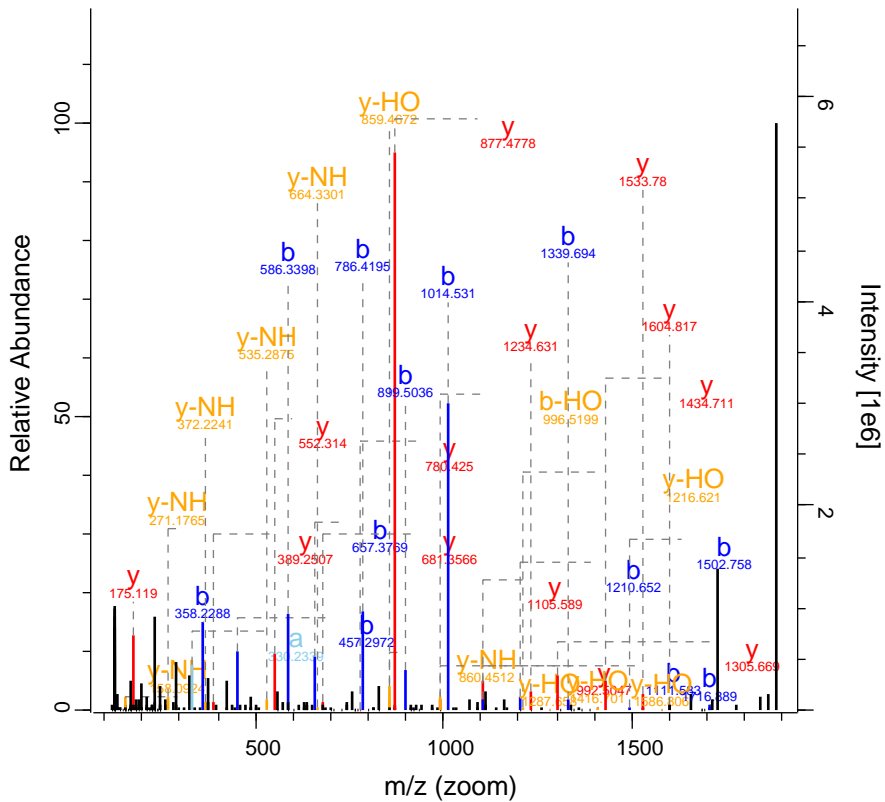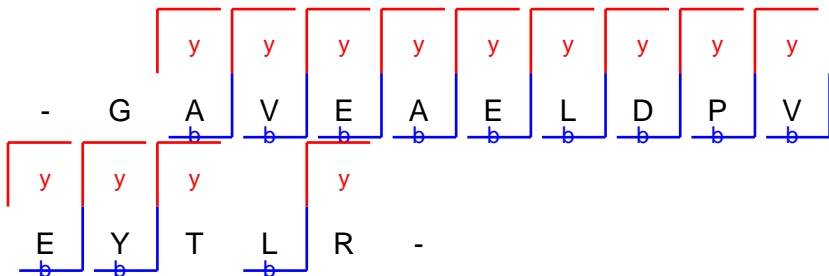

RO-QC-160121\_ZackD\_SS\_Set\_02\_Fractio 30004 FTMS; HC 133.86 839.48 GTF3C6

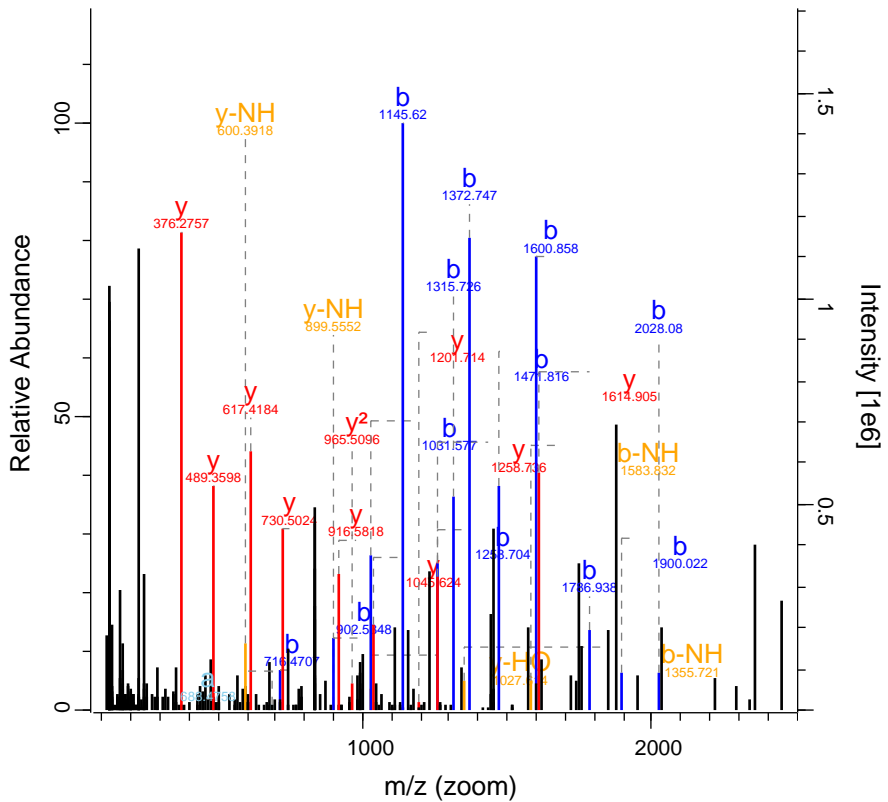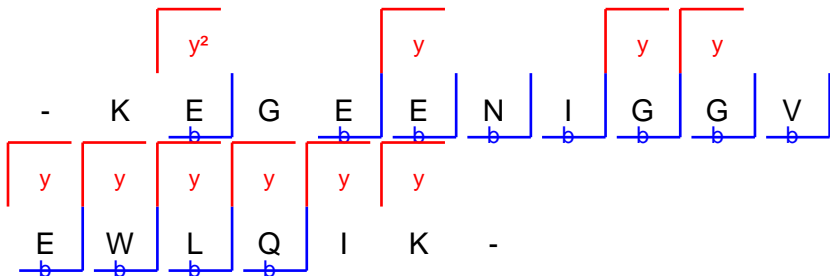

RO-QC-160121\_ZackD\_SS\_Set\_02\_Fraccio 30127 FTMS; HC 188.23 828.84 C4orf33

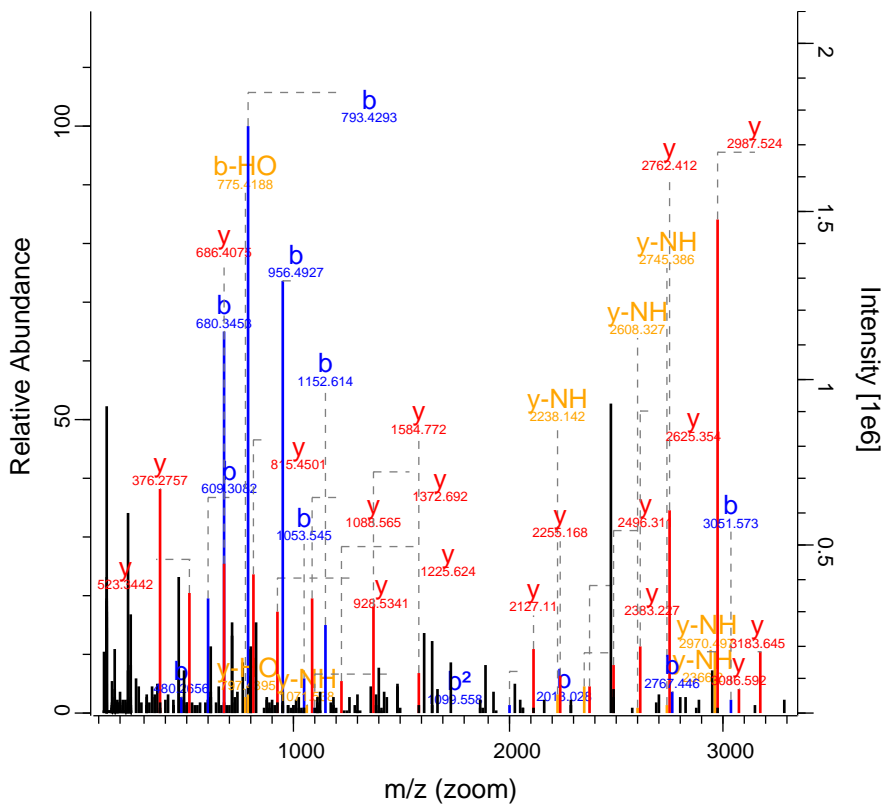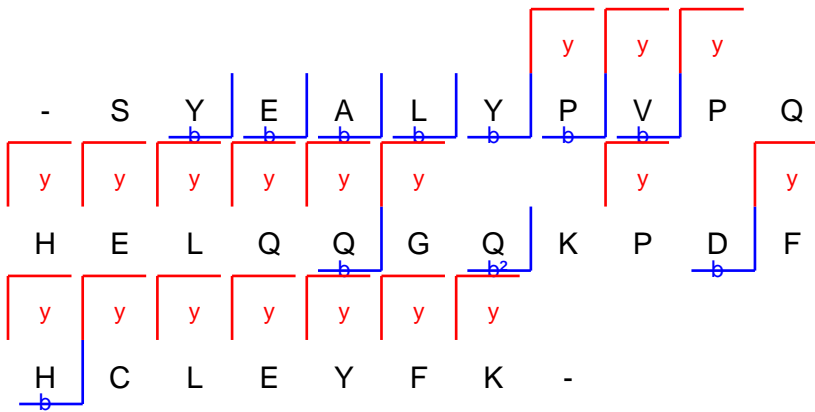

RO-QC-160121\_ZackD\_SS\_Set\_02\_Fraction 30526 FTMS; HCl 79.51 872.5 KBTBD2

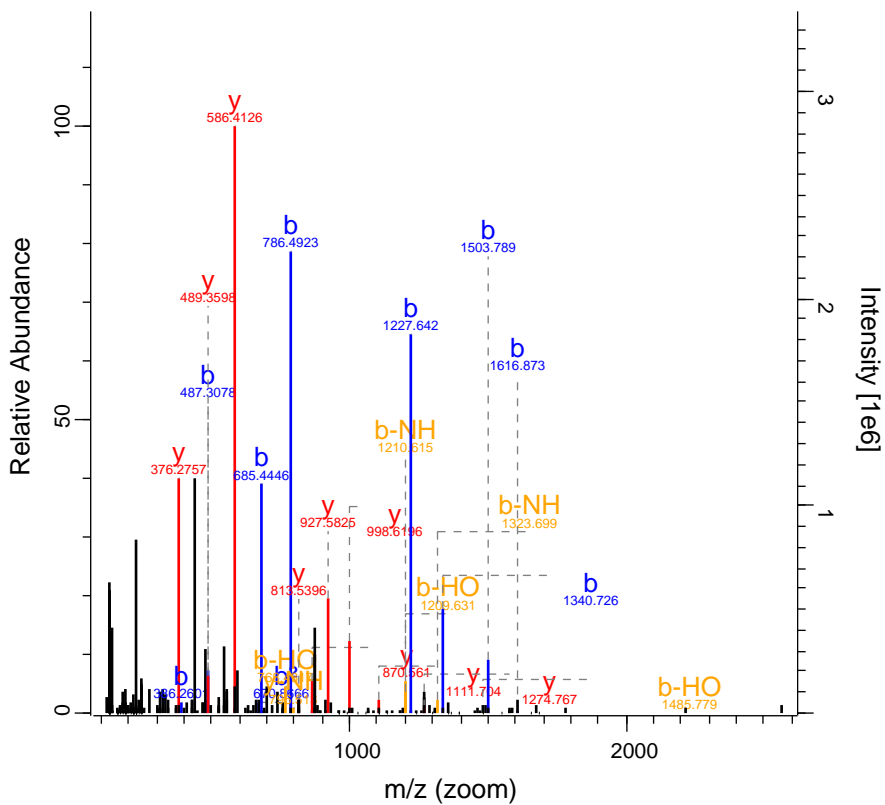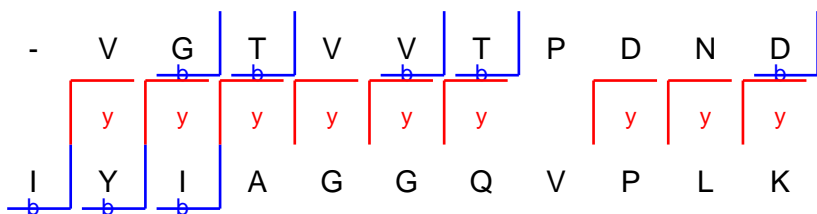

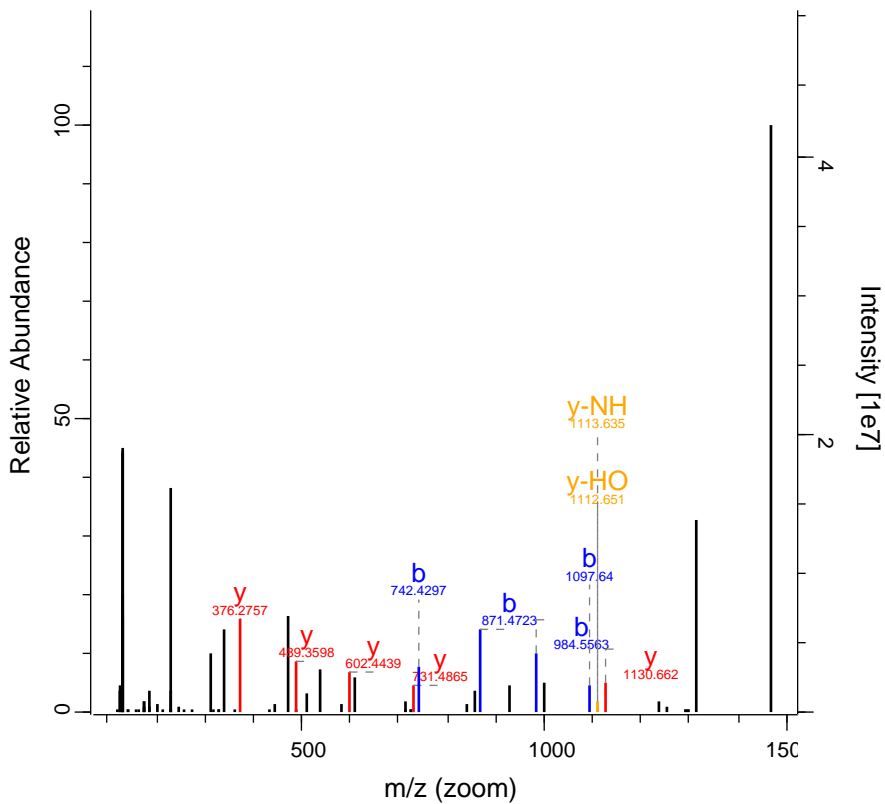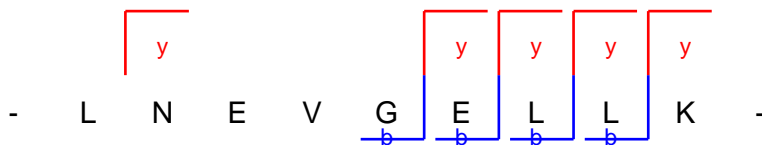

| Raw File                                | Scan  | Method    | Score | m/z    |
|-----------------------------------------|-------|-----------|-------|--------|
| RO-QC-160121_ZackD_SS_Set_02_Fraction_6 | 30872 | FTMS; HCD | 53.76 | 491.64 |

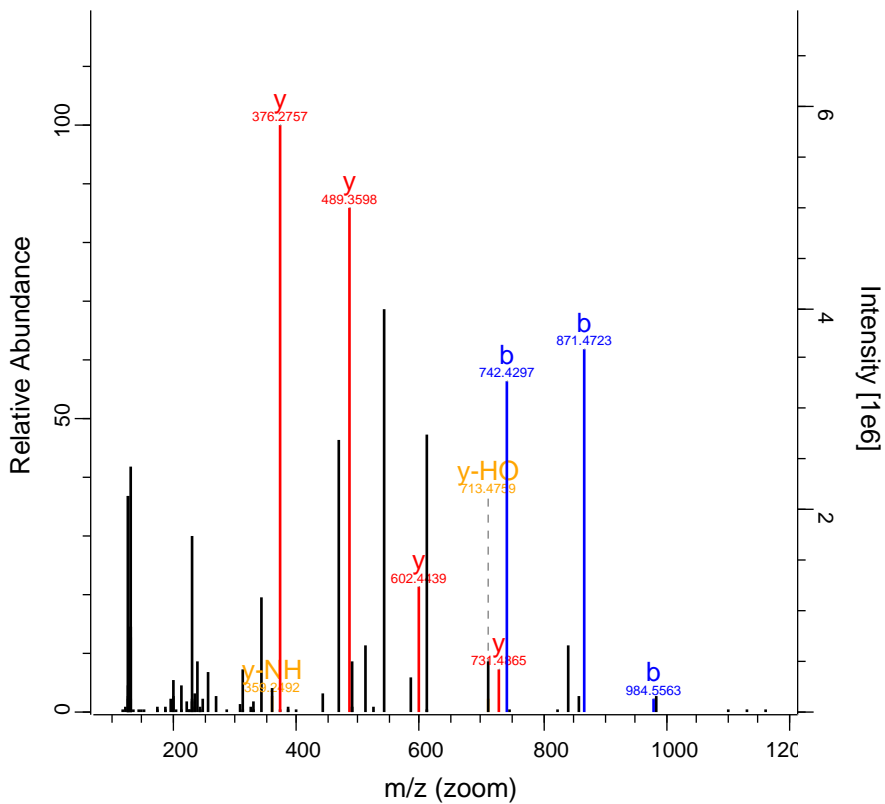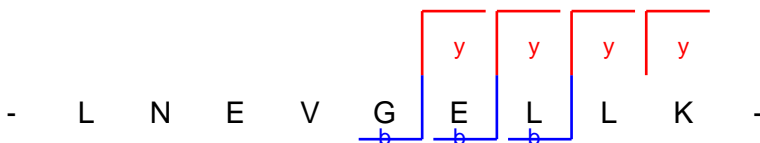

RO-QC-160121\_ZackD\_SS\_Set\_02\_Fratio 31147 FTMS; HC 230.95 856.96 UBE2S

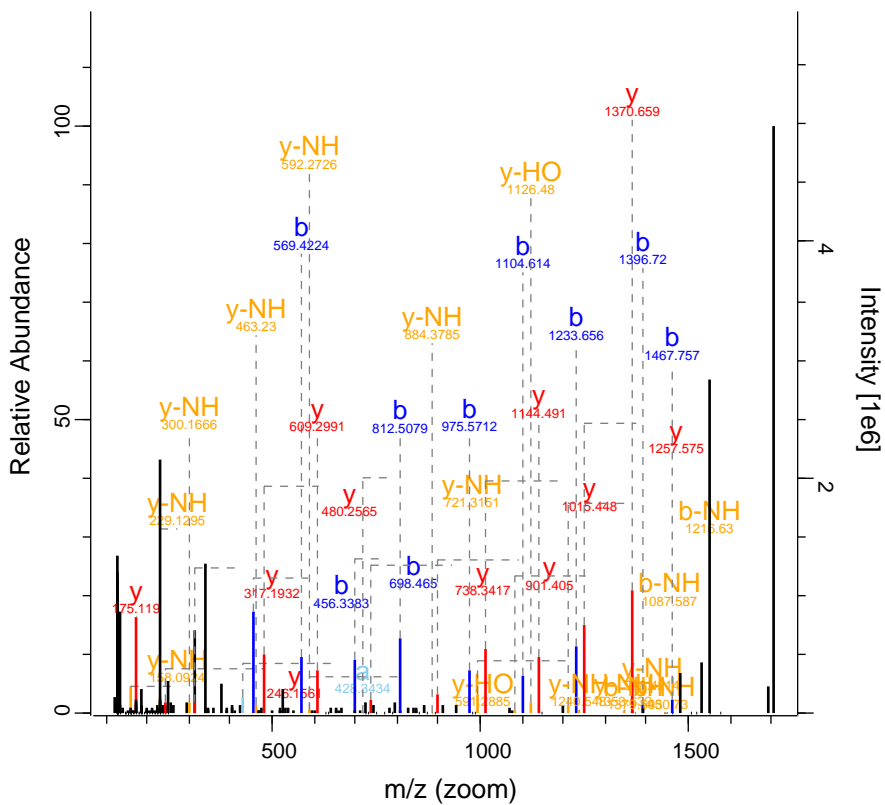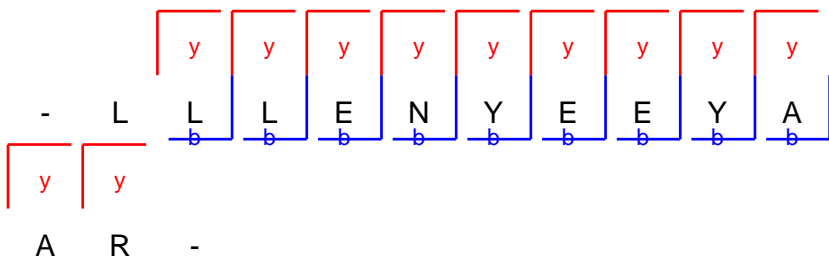

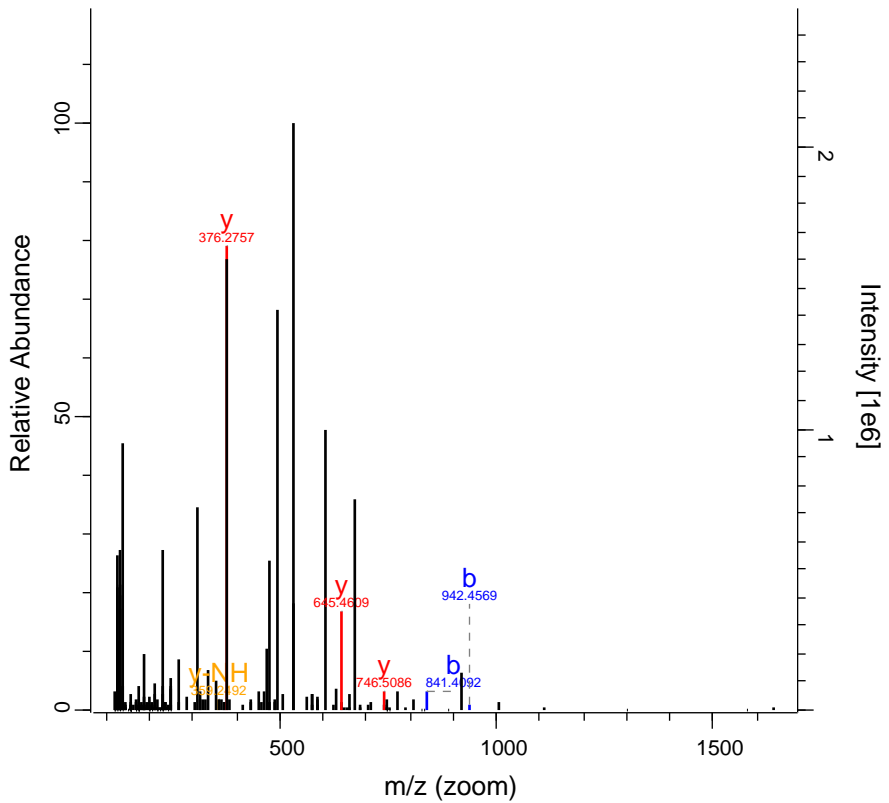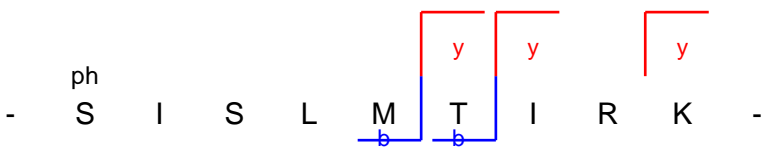



RO-QC-160121\_ZackD\_SS\_Set\_02\_Fraction 31637 FTMS; HC 74.15 729.43 BOLA1

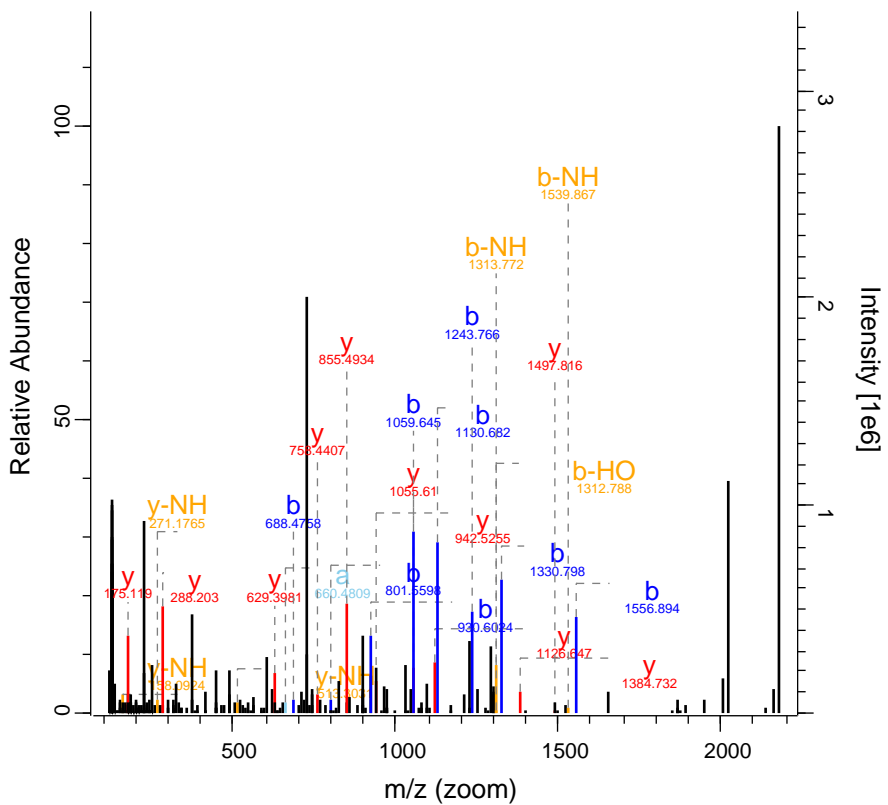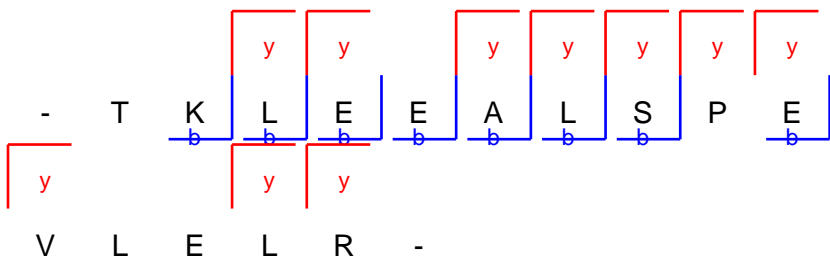

V L E L R -

RO-QC-160121\_ZackD\_SS\_Set\_02\_Fractio 32112 FTMS; HC 105.16 911.73 C12orf29

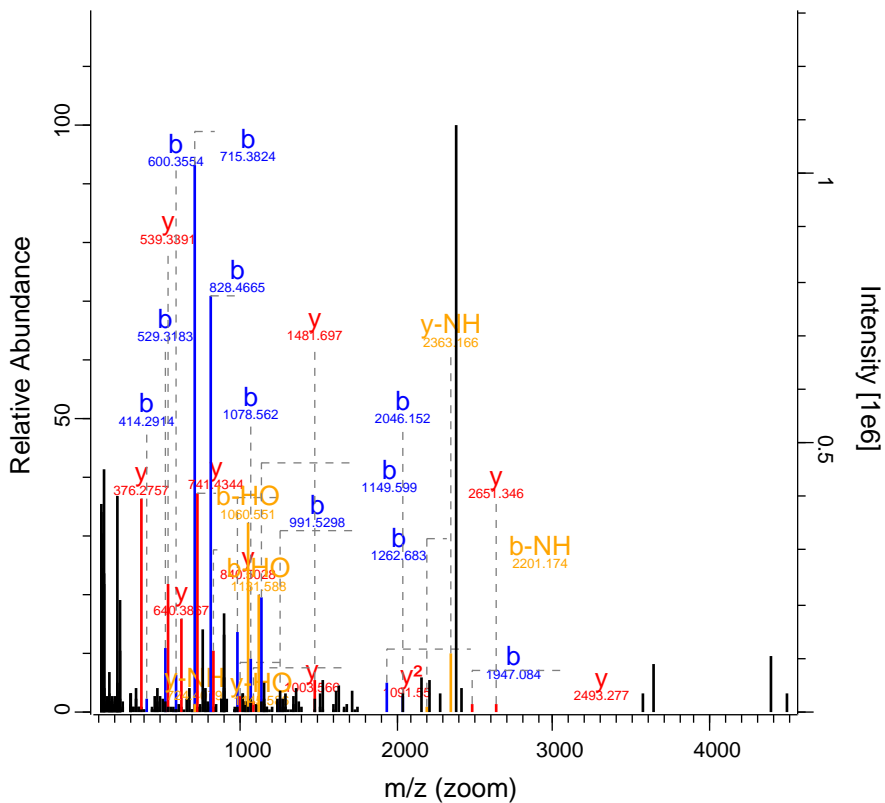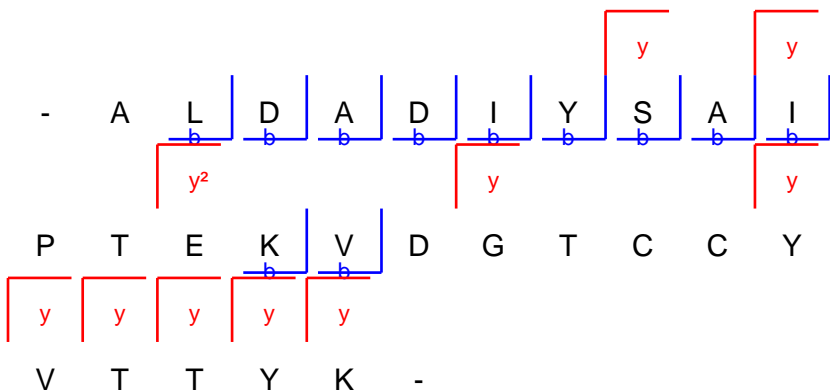

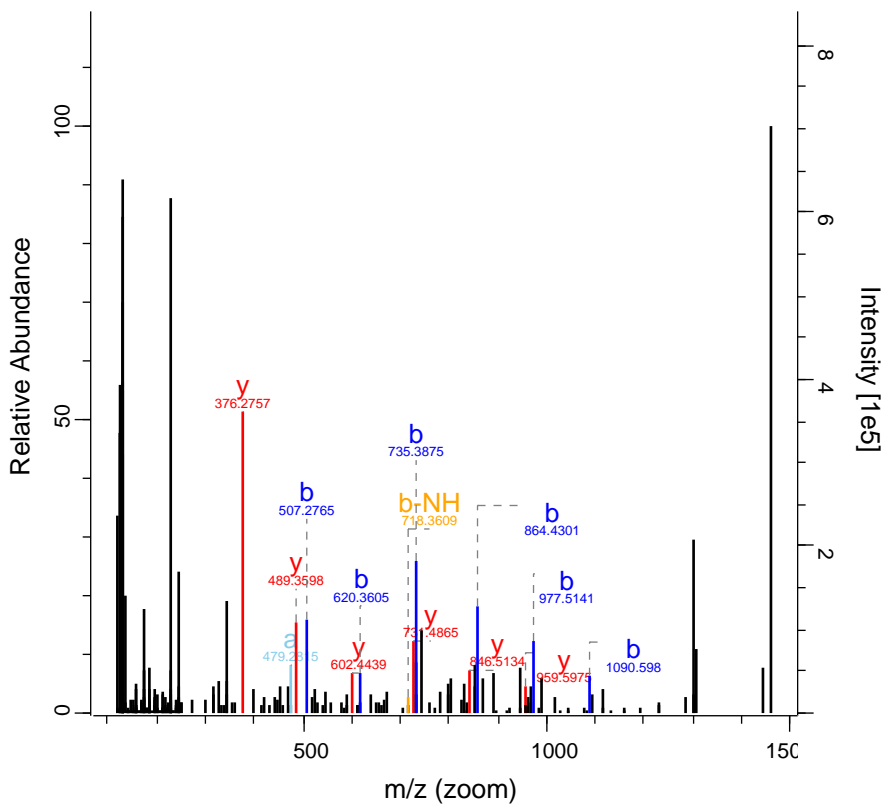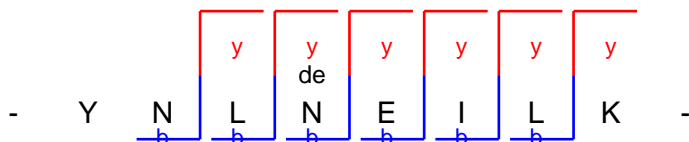

RO-QC-160121\_ZackD\_SS\_Set\_02\_Fraction 32314 FTMS; HC 98.51 739.42 MZT1

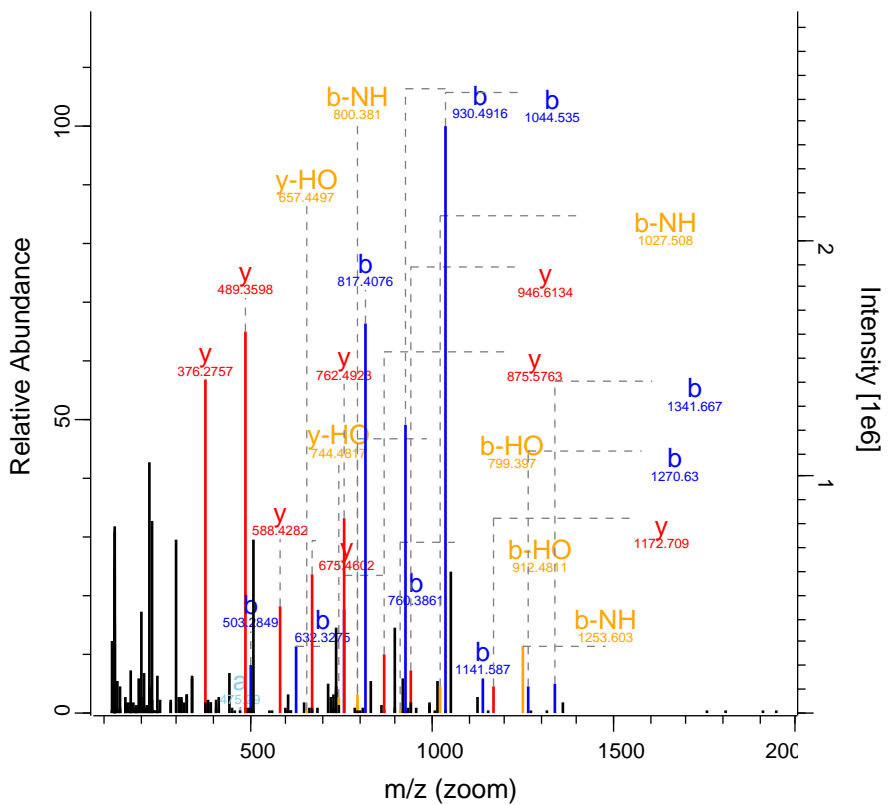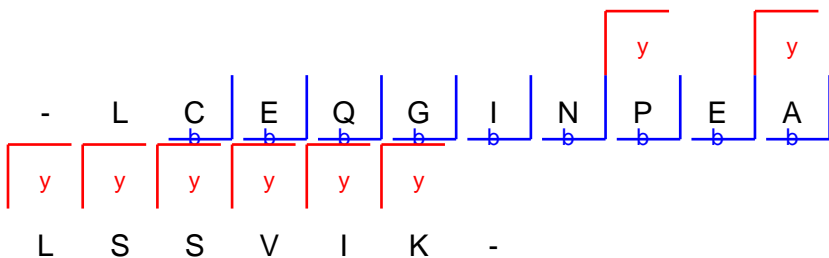

RO-QC-160121\_ZackD\_SS\_Set\_02\_Fraction 32736 FTMS; HCl 45.26 754.9 CFTR

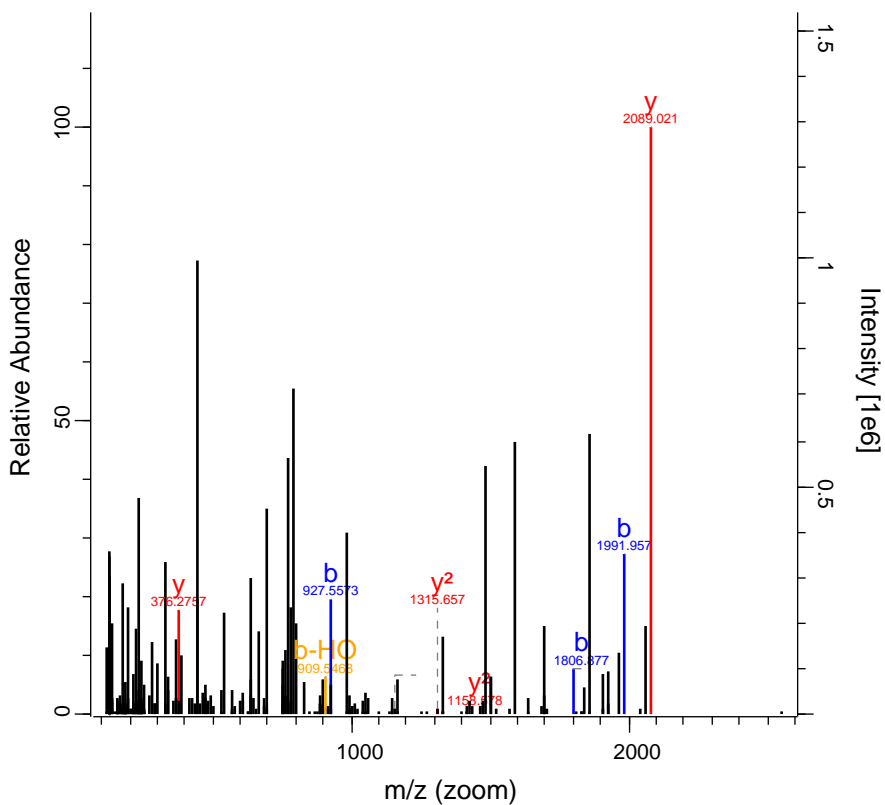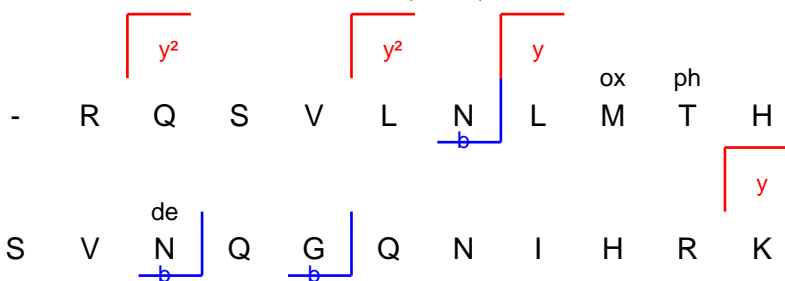

RO-QC-160121\_ZackD\_SS\_Set\_02\_Fractic 34655 FTMS; HC 143.31 1030.47 DENND6A

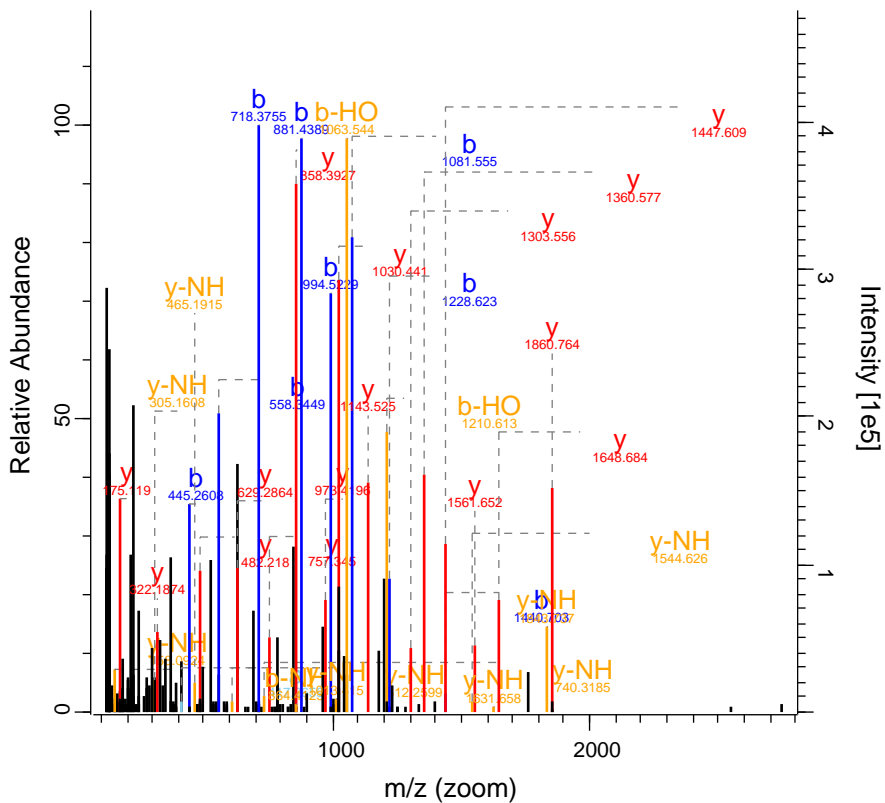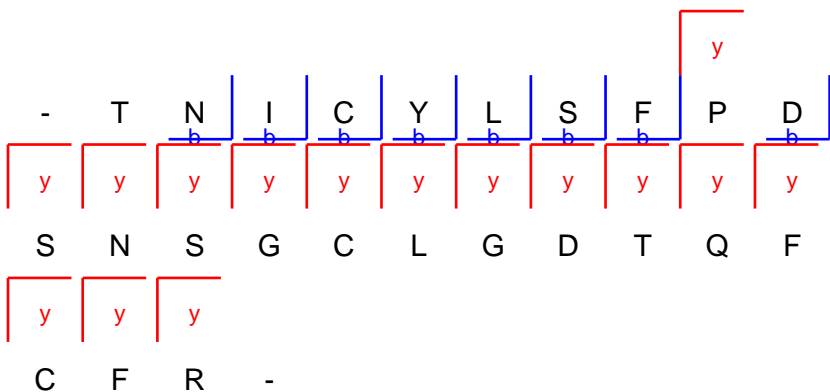

RO-QC-160121\_ZackD\_SS\_Set\_02\_Fractic 35005 FTMS; HC 45.55 1243.66 LPPR5

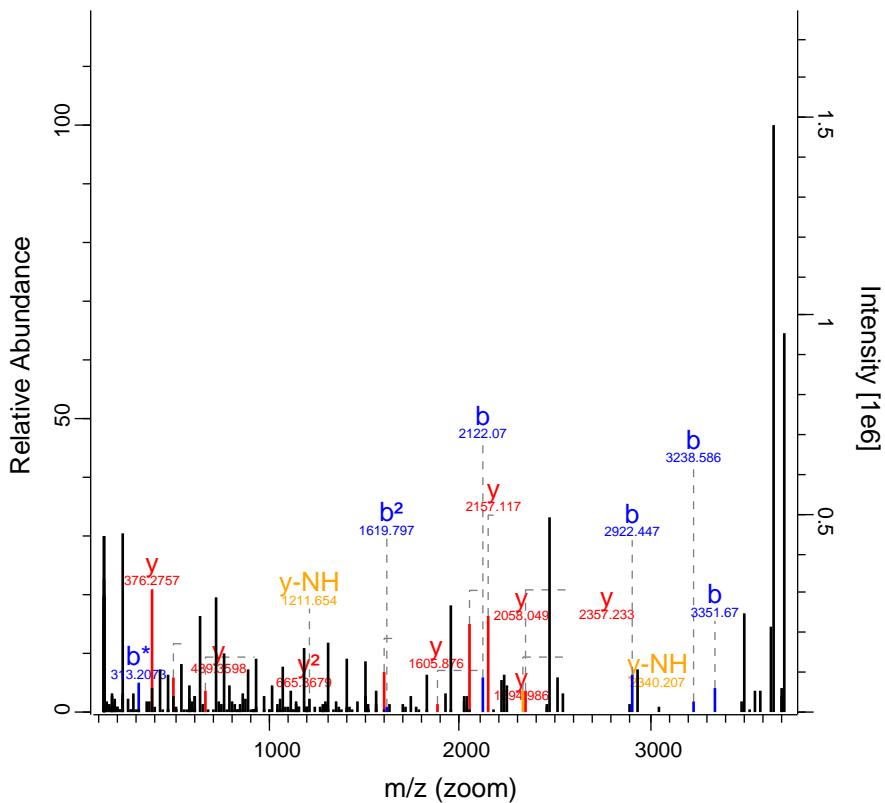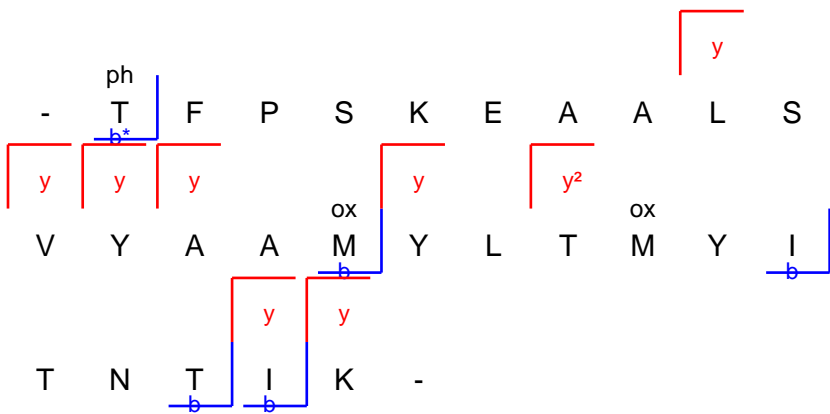

RO-QC-160121\_ZackD\_SS\_Set\_02\_Fractic 36159 FTMS; HC 193.14 1066.27 MT-CO1

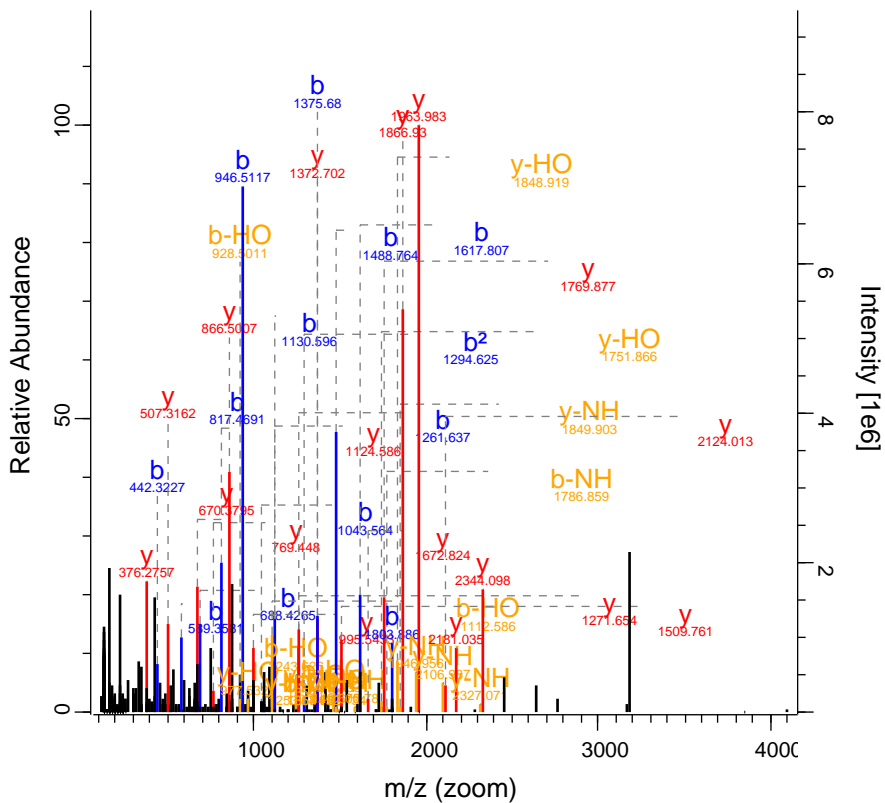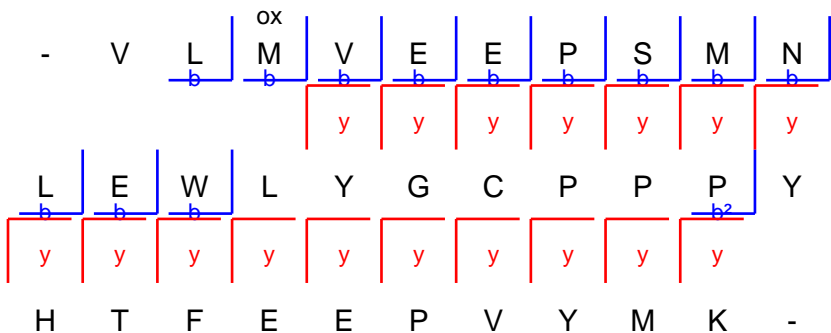



RO-QC-160121\_ZackD\_SS\_Set\_02\_Fraction 36532 FTMS; HC 79.51 912.16 CID4

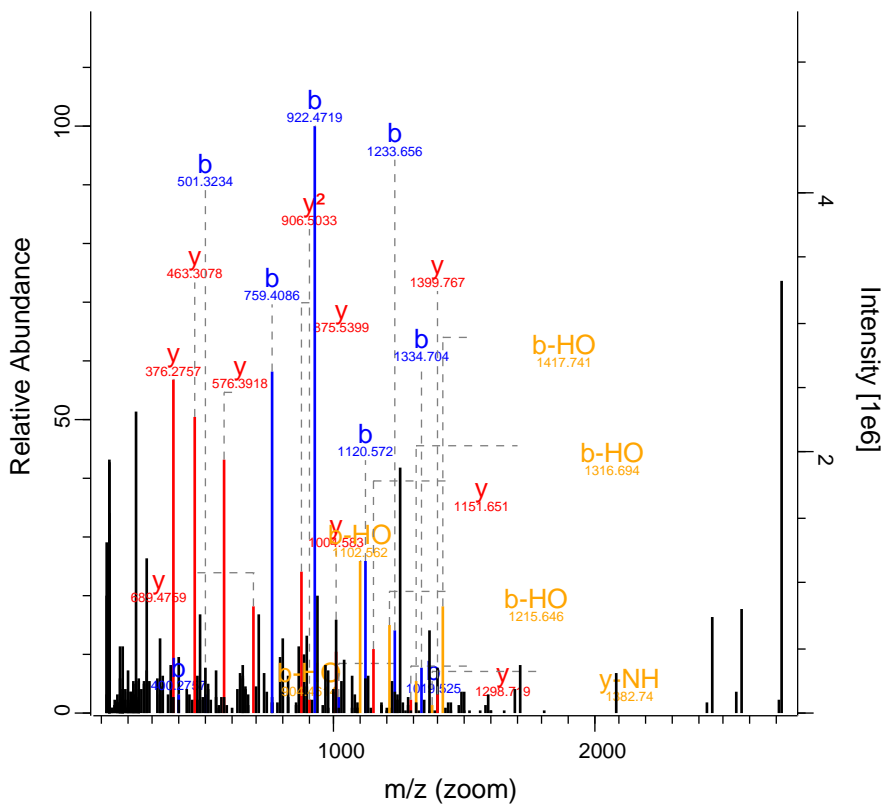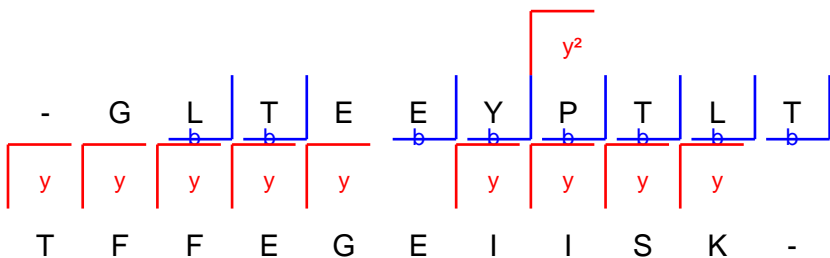

RO-QC-160121\_ZackD\_SS\_Set\_02\_Fractio 36599 FTMS; HC 116.73 860.44 PRSS58

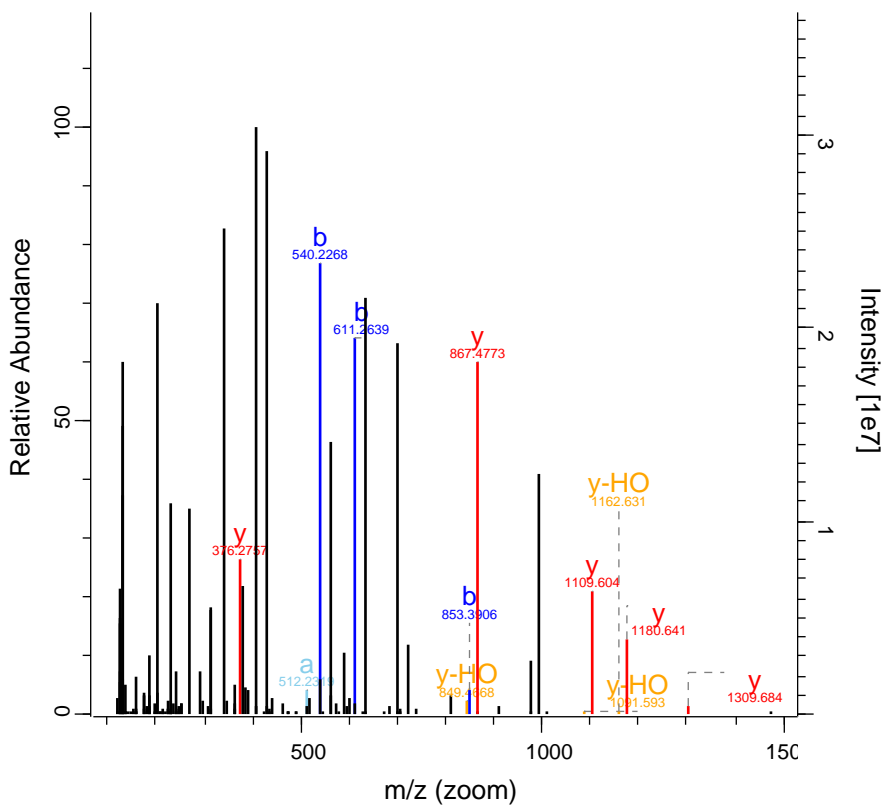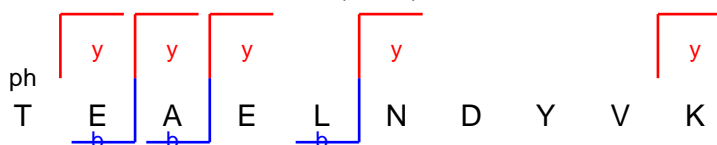

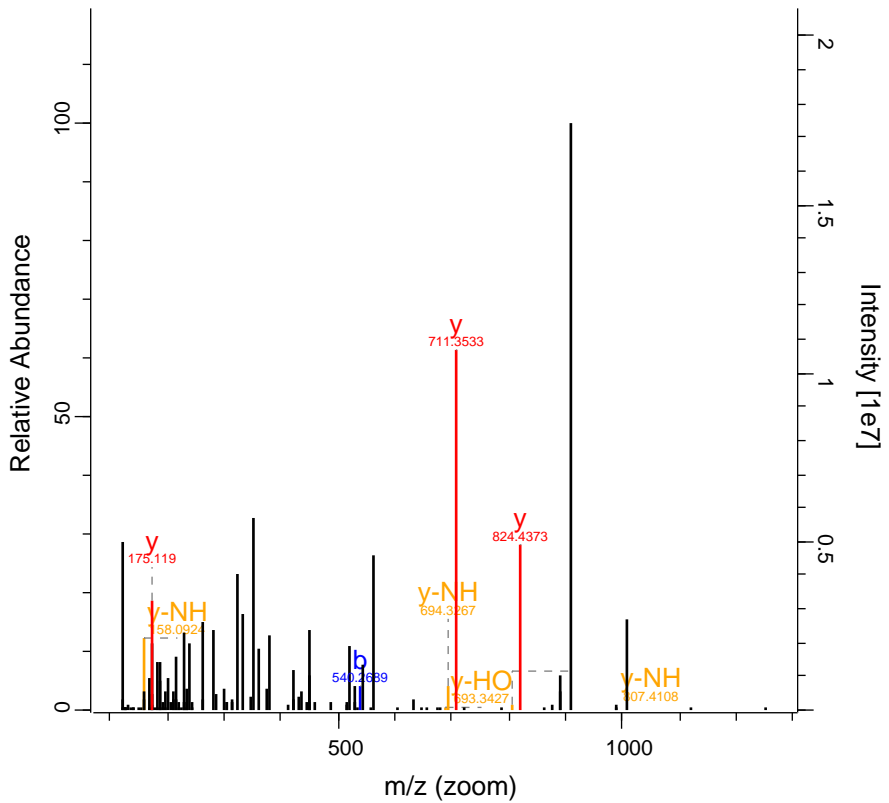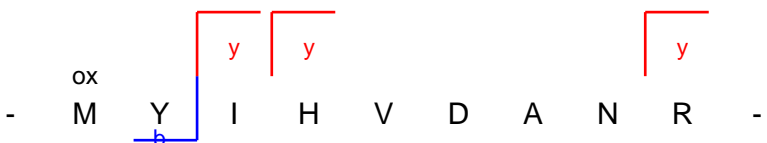

RO-QC-160121\_ZackD\_SS\_Set\_02\_Fractio 37294 FTMS; HC 161.17 929.53 GRK6;GRK5

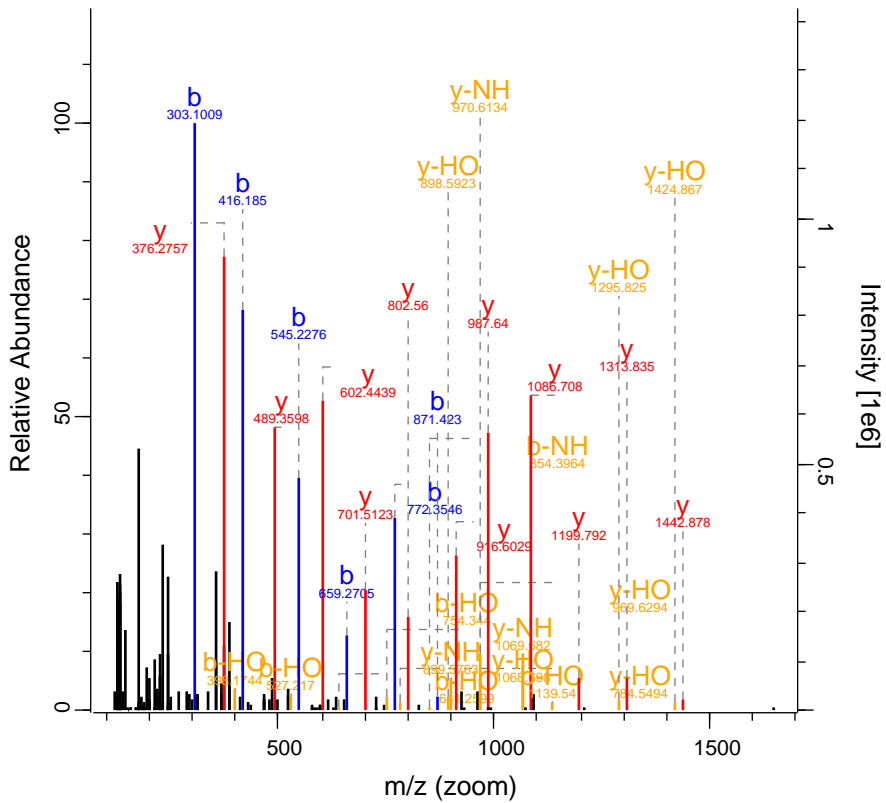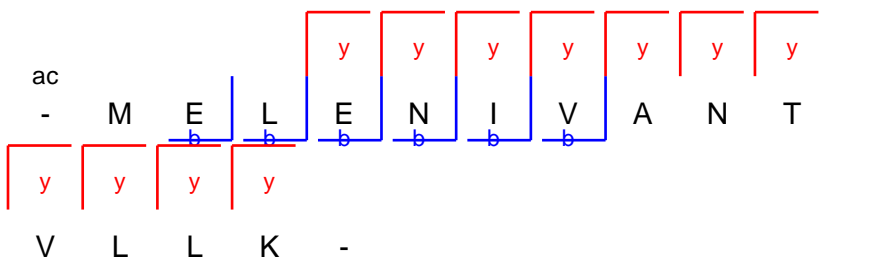

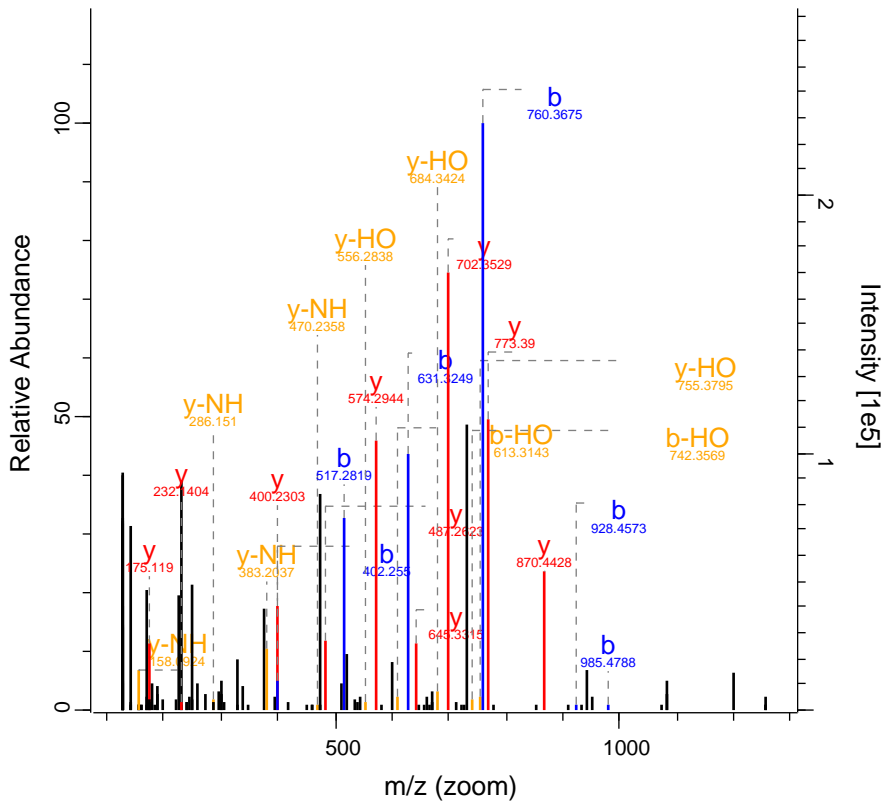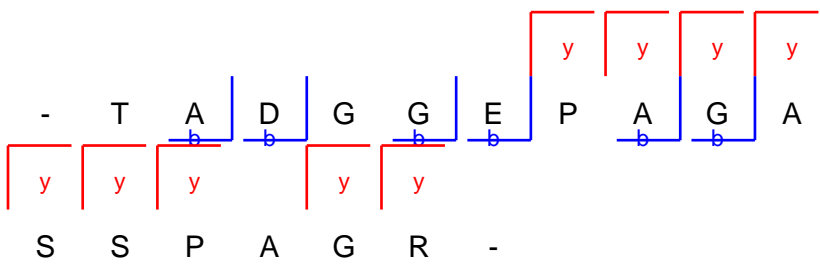

S S P A G R -

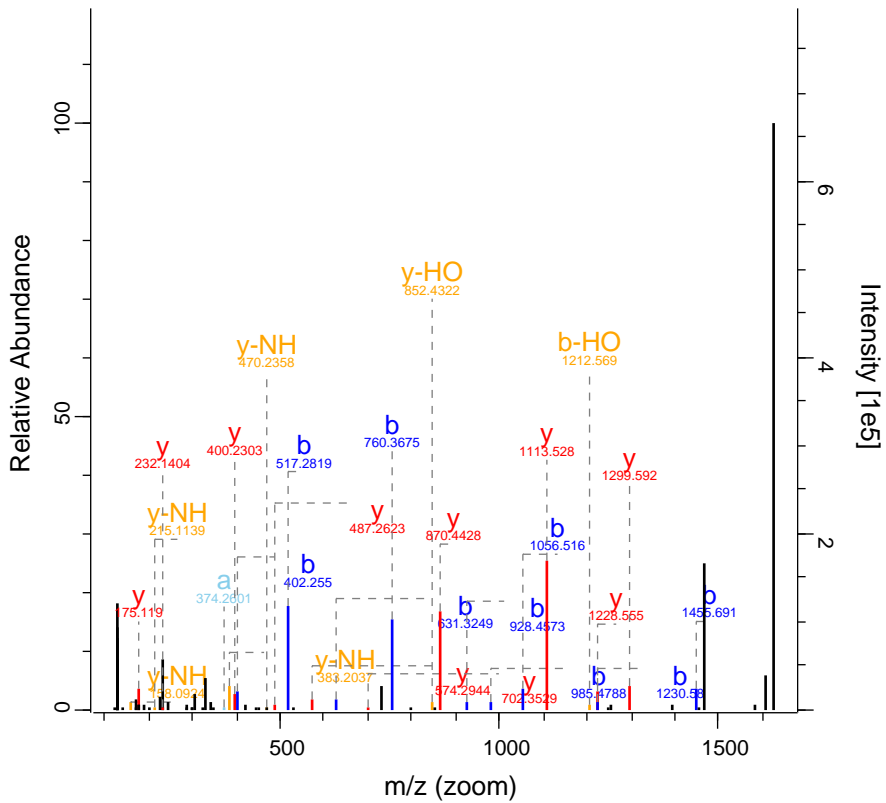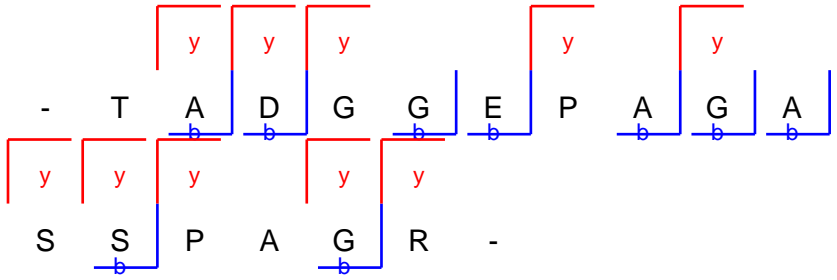

RO-QC-160121\_ZackD\_SS\_Set\_02\_Fraction 5391 FTMS; HCl 68.07 490.79 TEX9

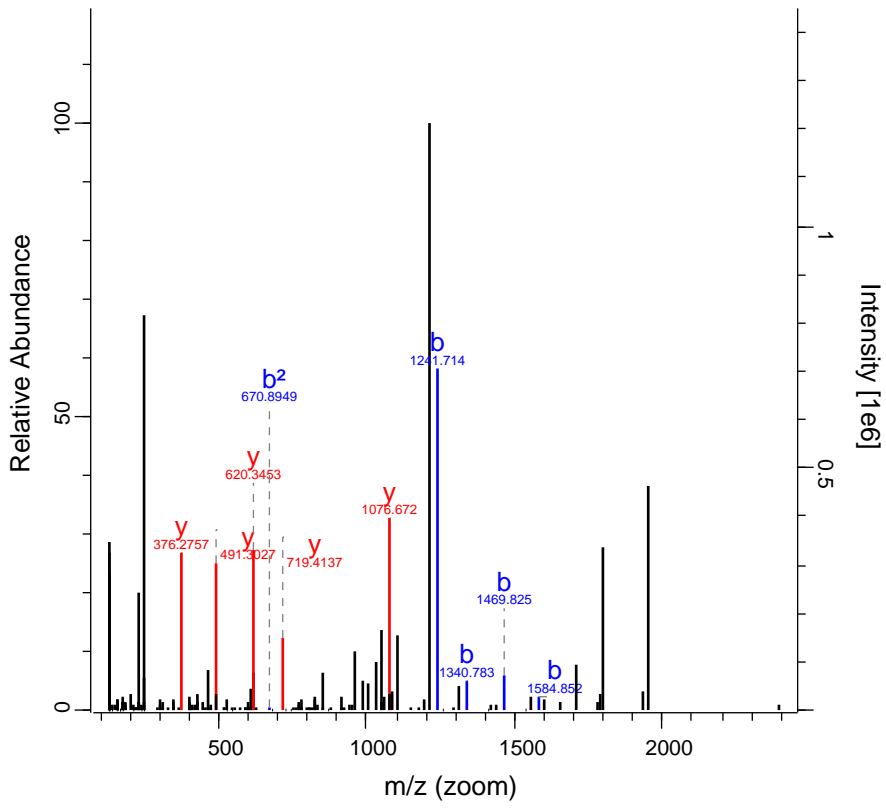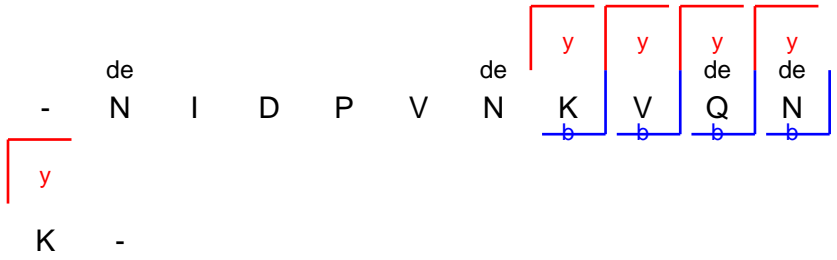

y  
K -

RO-QC-160121\_ZackD\_SS\_Set\_02\_Fraction 6023 FTMS; HCl 164.1 709.86 SLCO3A1

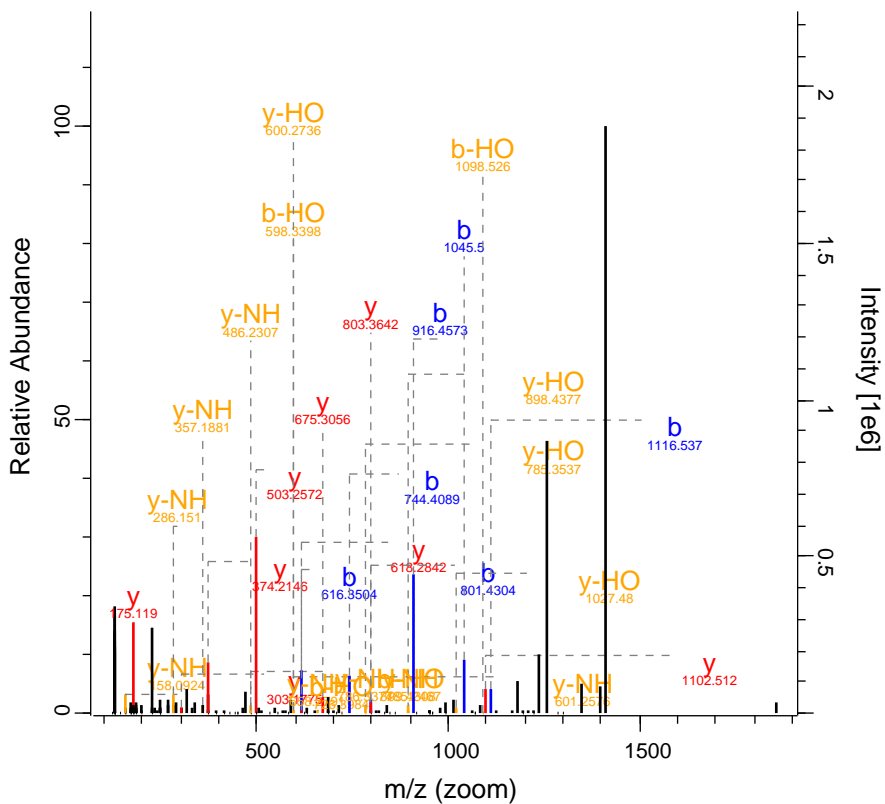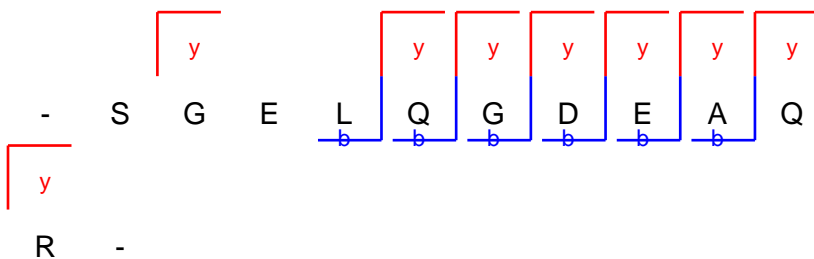





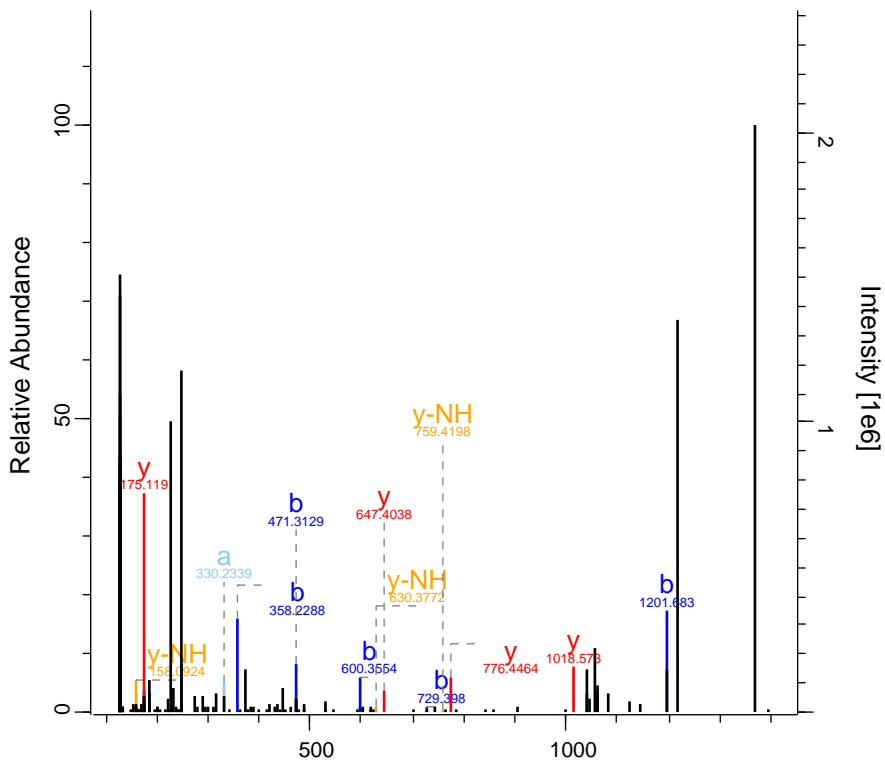

m/z (zoom)

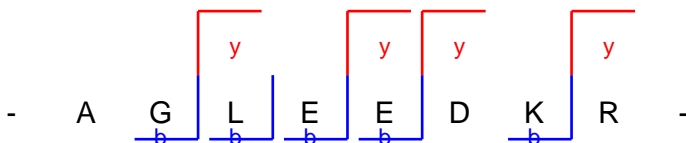

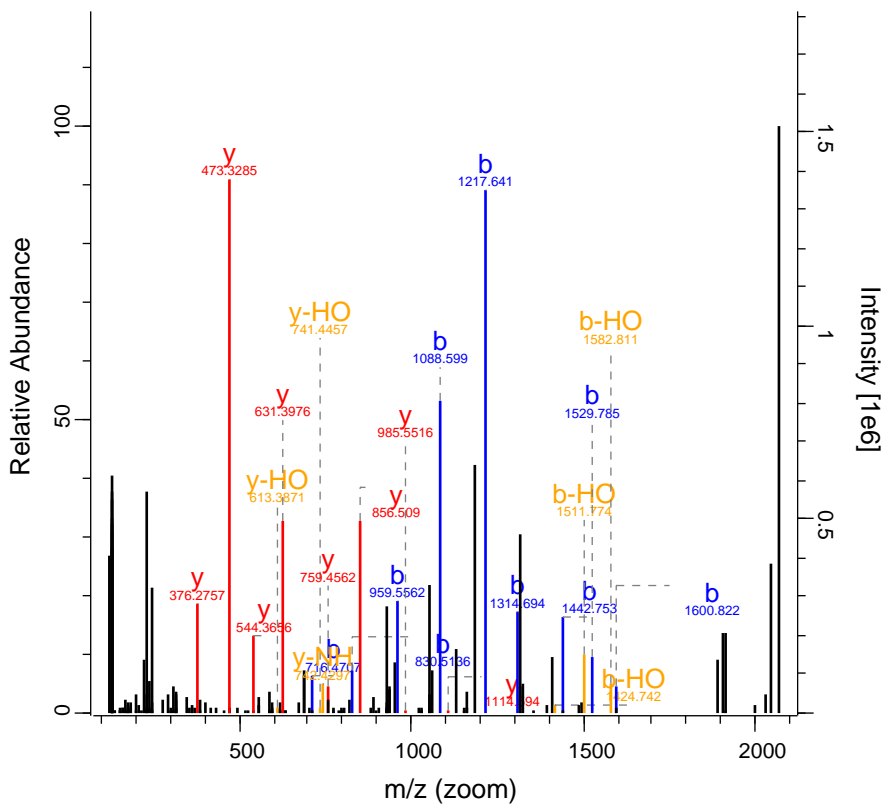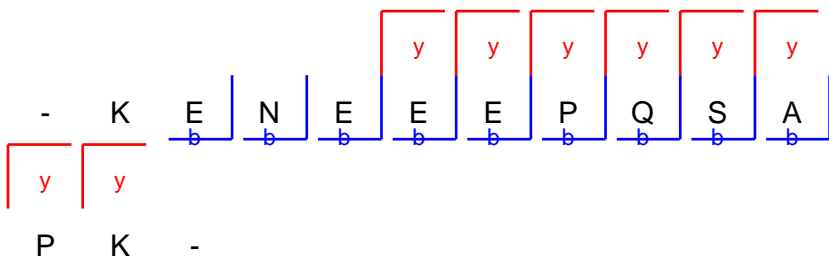



RO-QC-160121\_ZackD\_SS\_Set\_02\_Fraction 8087 FTMS; HCl 51.79 699.39 SLC7A6

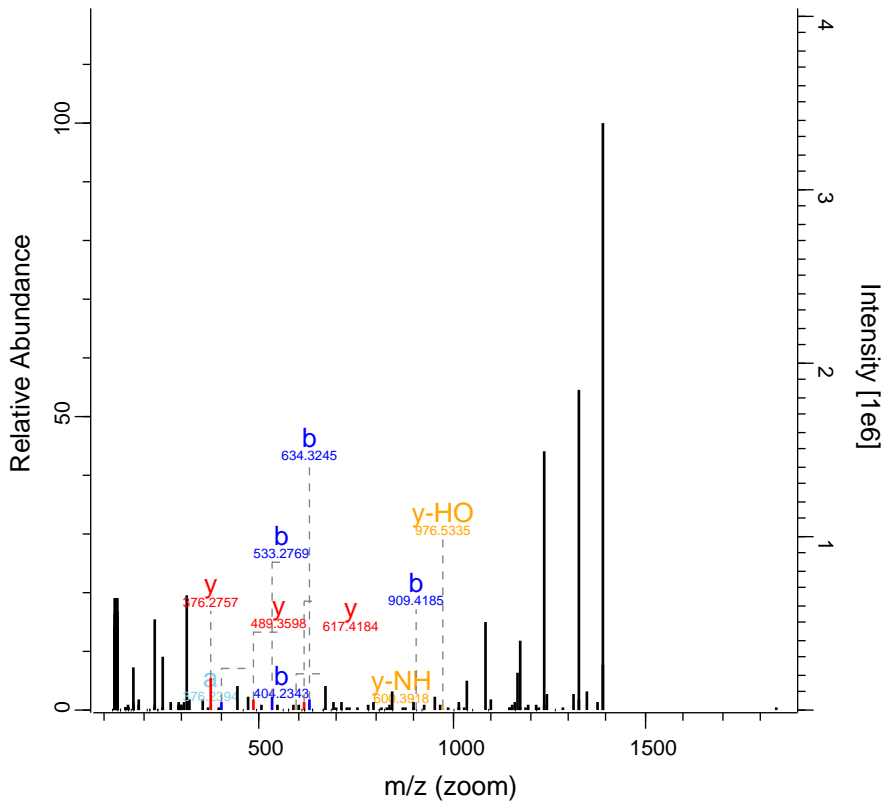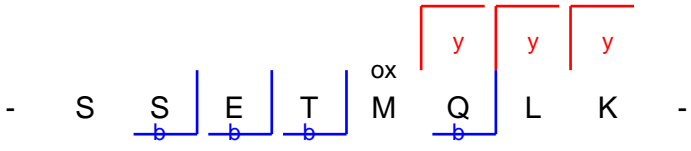

RO-QC-160121\_ZackD\_SS\_Set\_02\_Fraction 9442 FTMS; HCl 169.33 779.9 SLC39A1

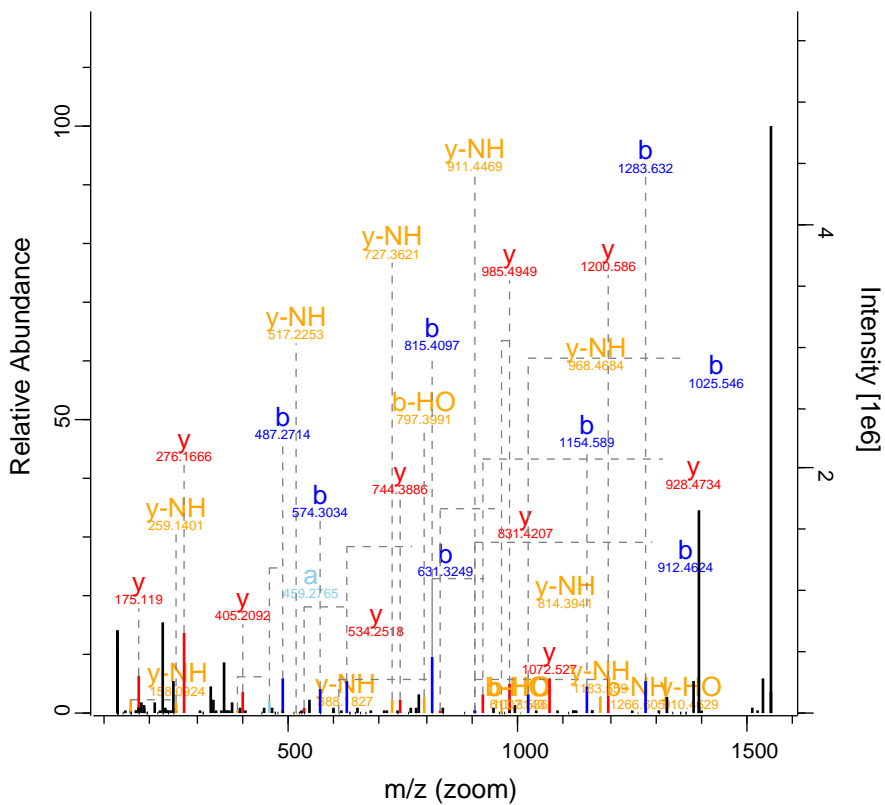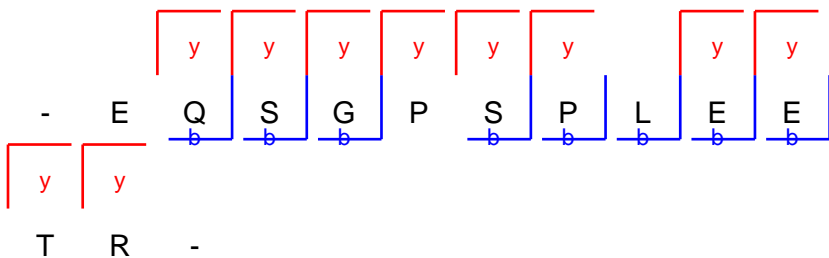

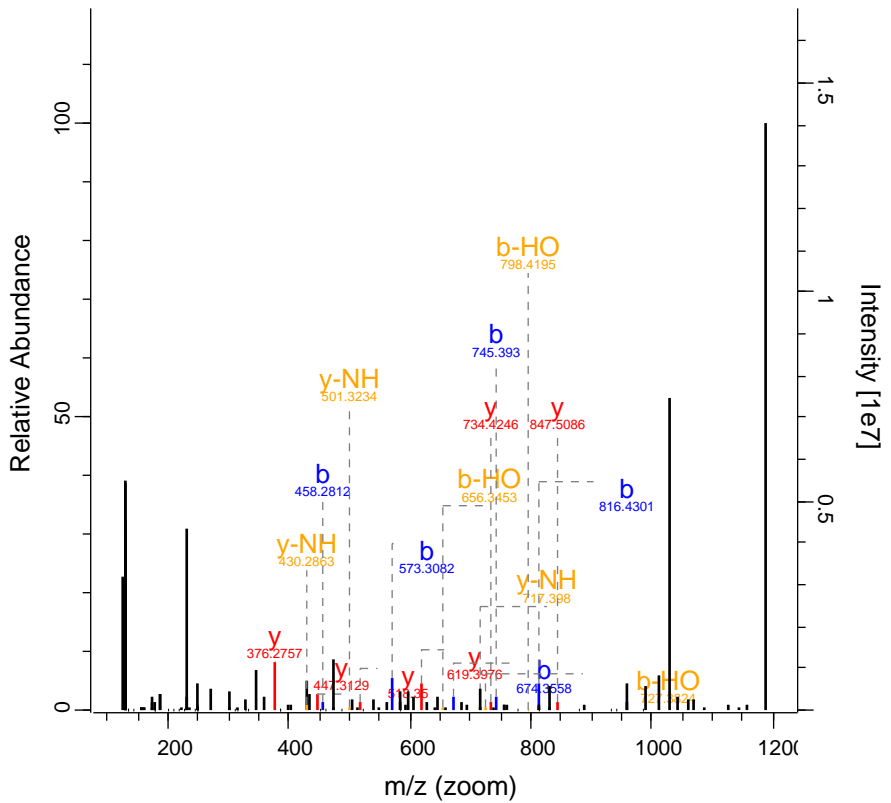

| Raw File                                | Scan  | Method    | Score | m/z    |
|-----------------------------------------|-------|-----------|-------|--------|
| RO-QC-160121_ZackD_SS_Set_02_Fraction_7 | 10570 | FTMS; HCD | 51.86 | 724.91 |

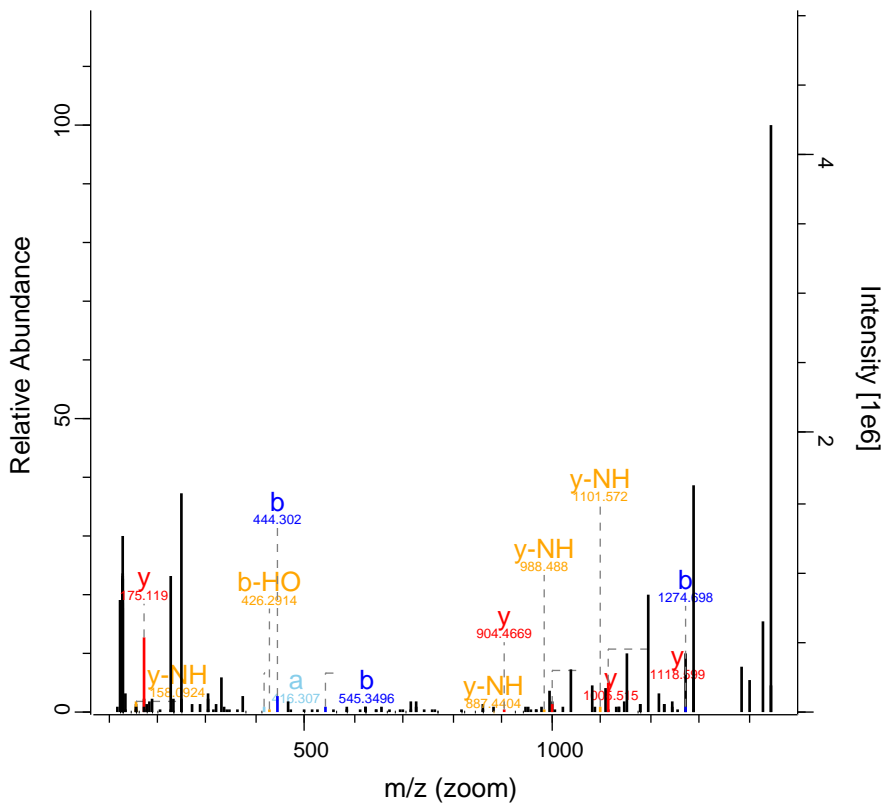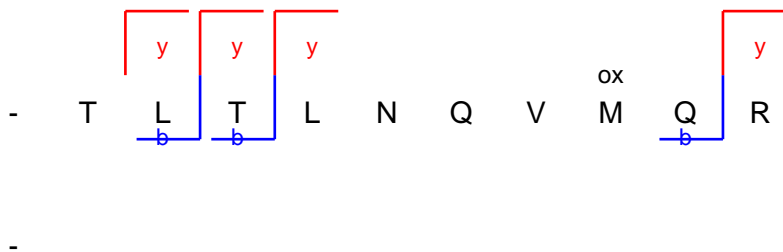



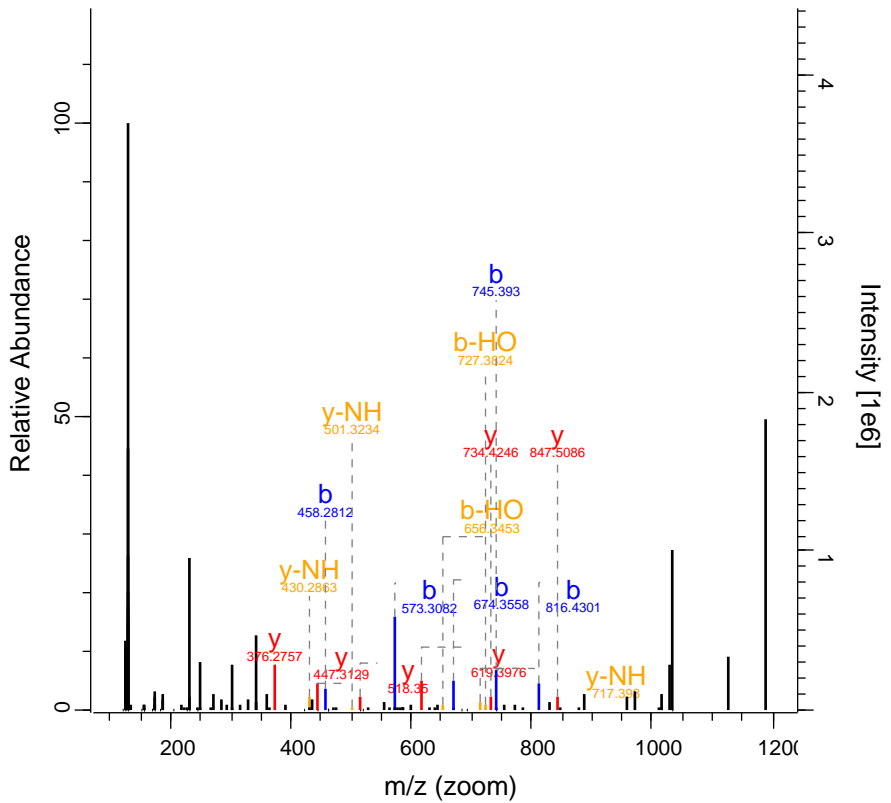

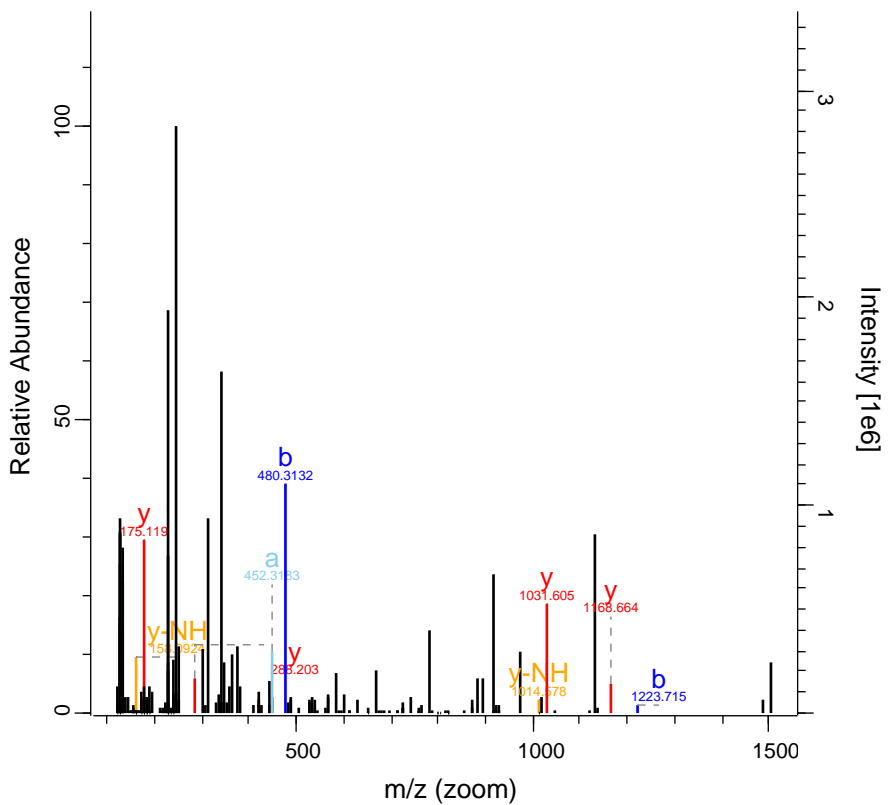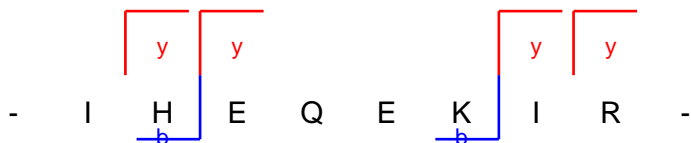

RO-QC-160121\_ZackD\_SS\_Set\_02\_Fraction 11949 FTMS; HC 82.45 623.87 TMEM141

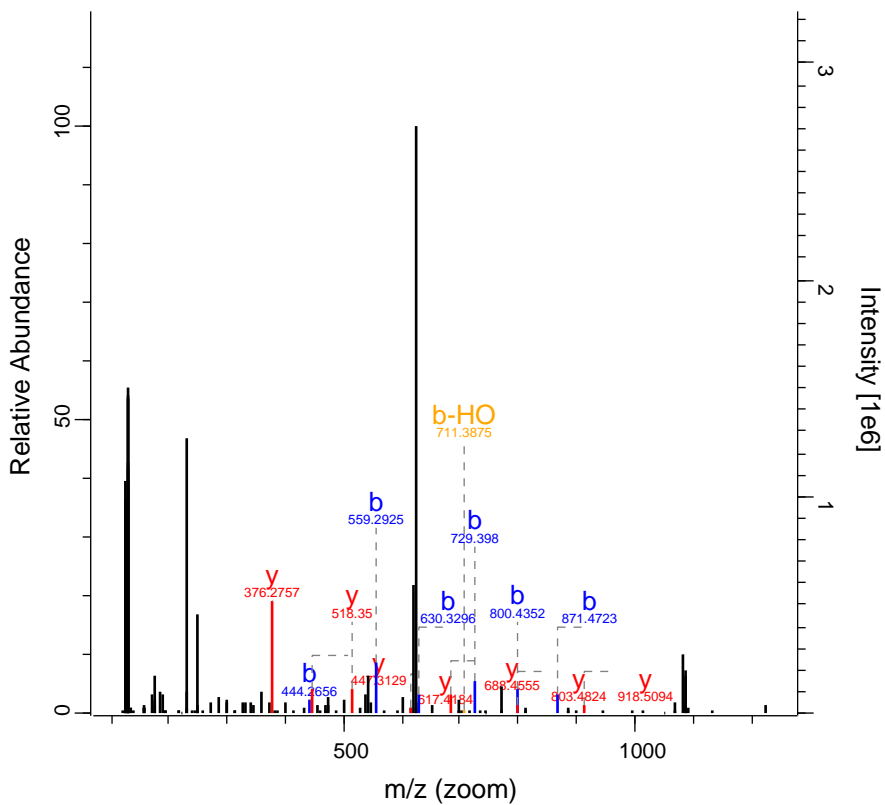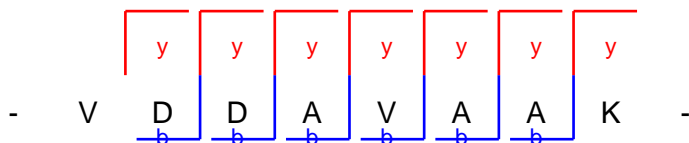

RO-QC-160121\_ZackD\_SS\_Set\_02\_Fratio 12003 FTMS; HC 157.24 804.44 MRPL34

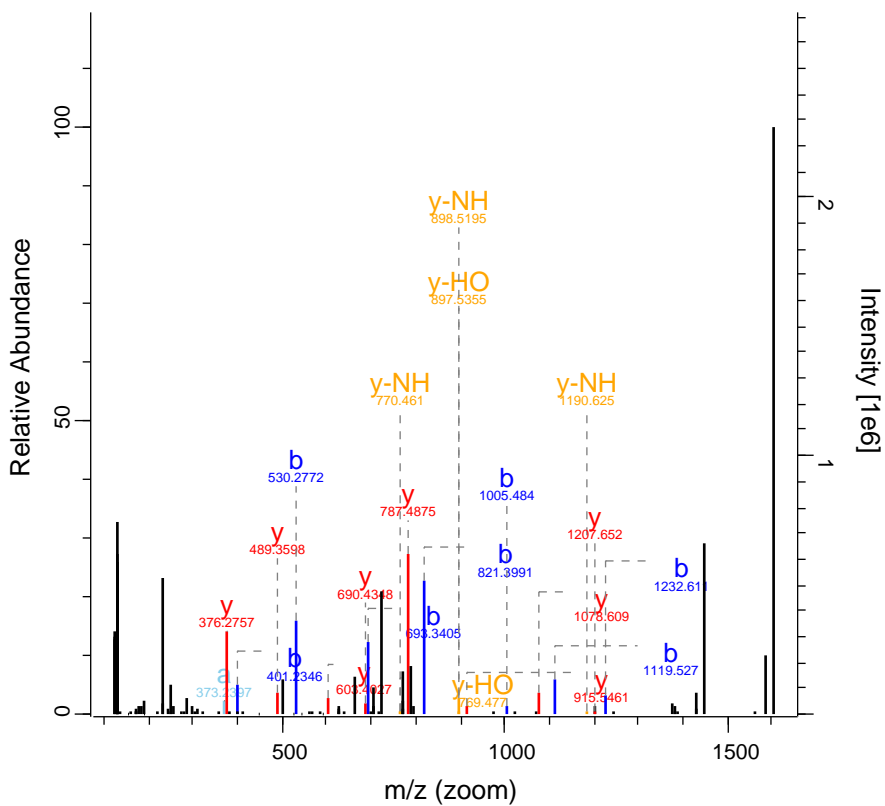

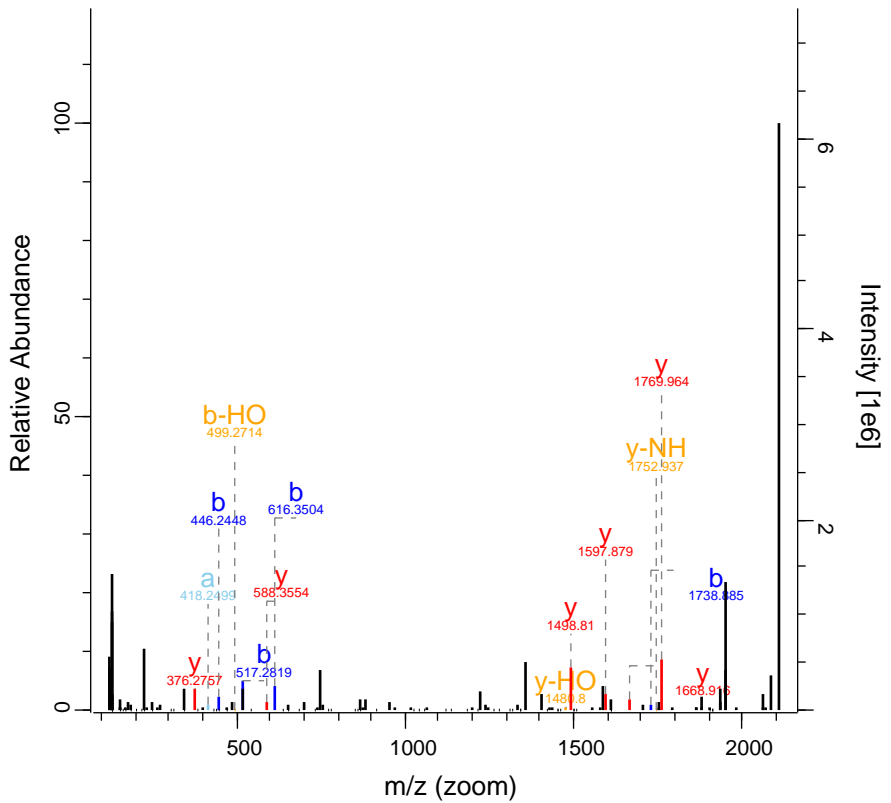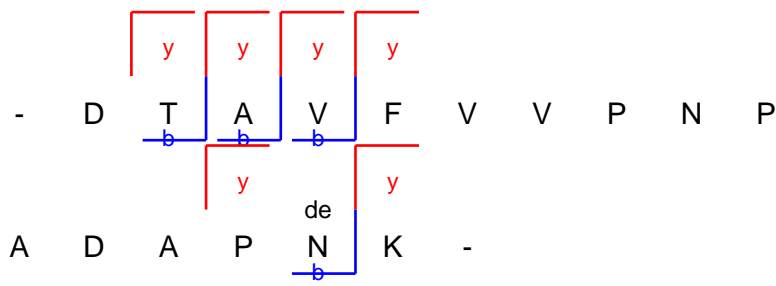

RO-QC-160121\_ZackD\_SS\_Set\_02\_Fraction17392 FTMS; HC 61.96 1269.7 FAM81A

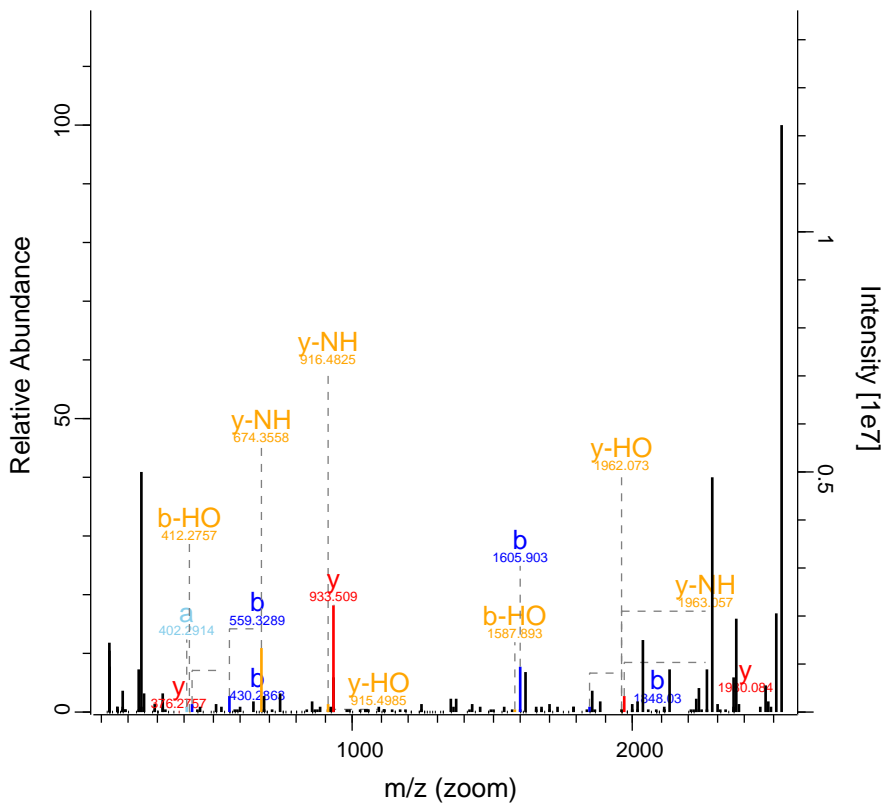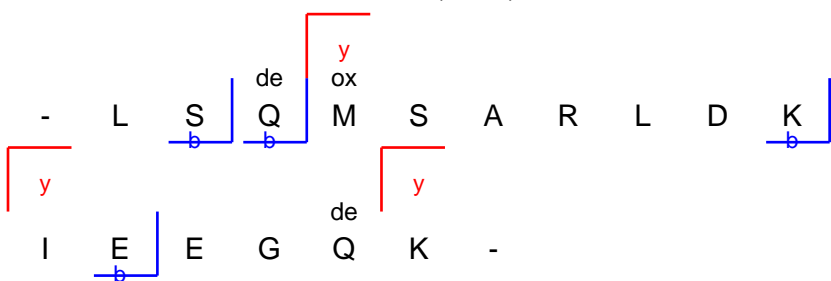

RO-QC-160121\_ZackD\_SS\_Set\_02\_Fraction 18800 FTMS; HCl 74.34 799.5 GVINP1

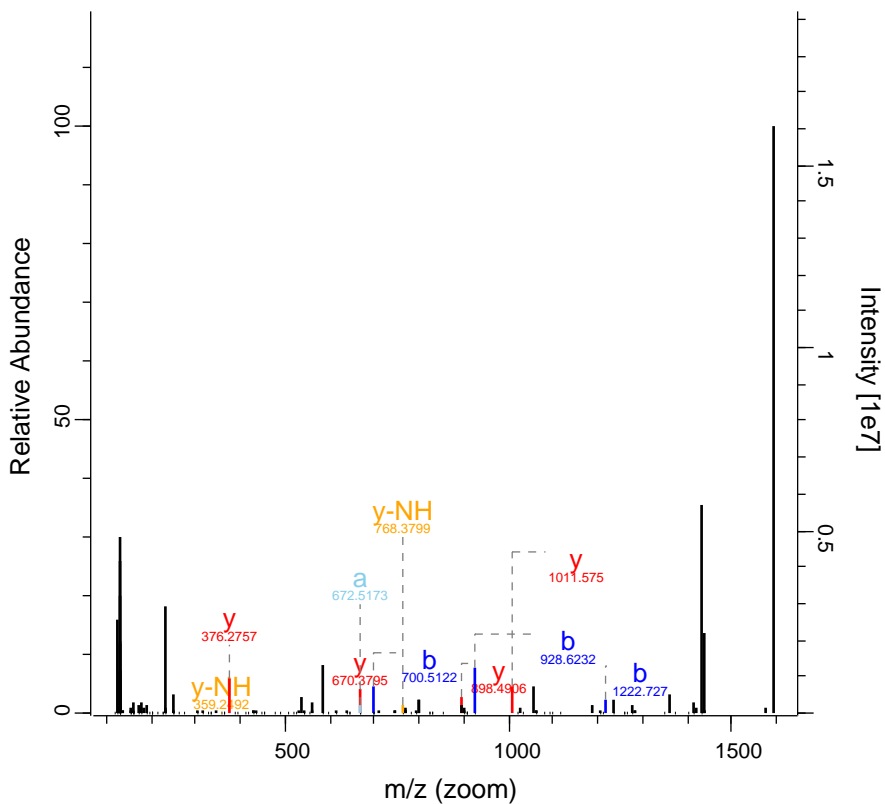

m/z (zoom)

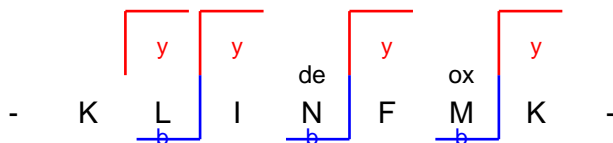

RO-QC-160121\_ZackD\_SS\_Set\_02\_Fraction18819 FTMS; HC 60.79 533.34 GVINP1

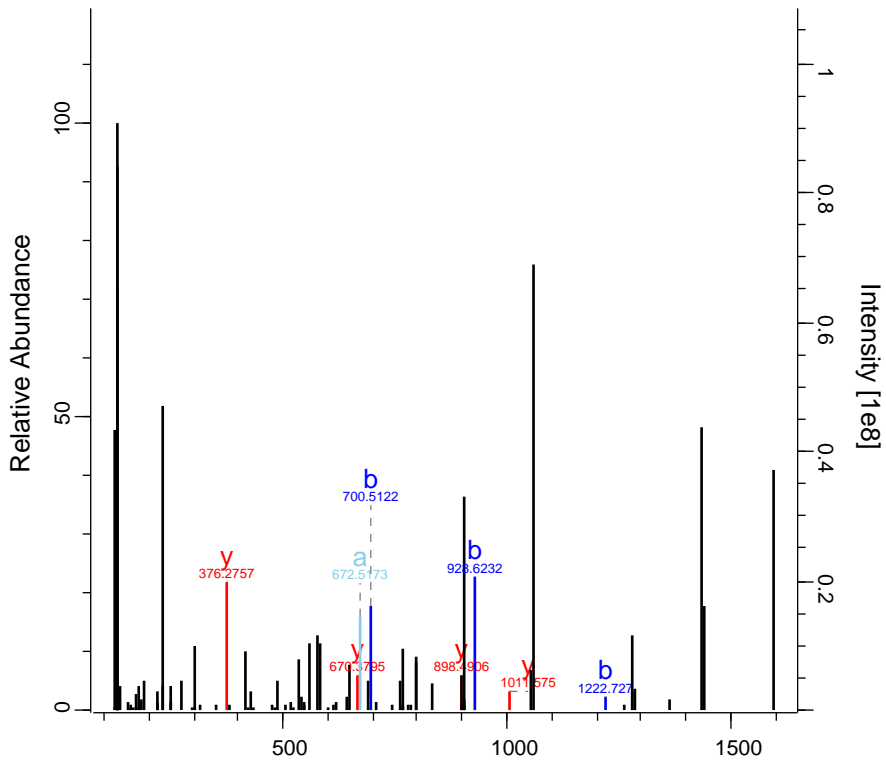

m/z (zoom)

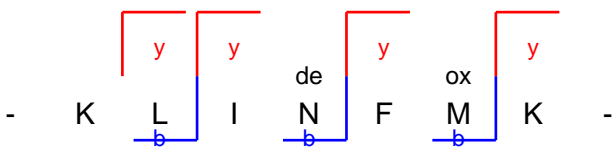



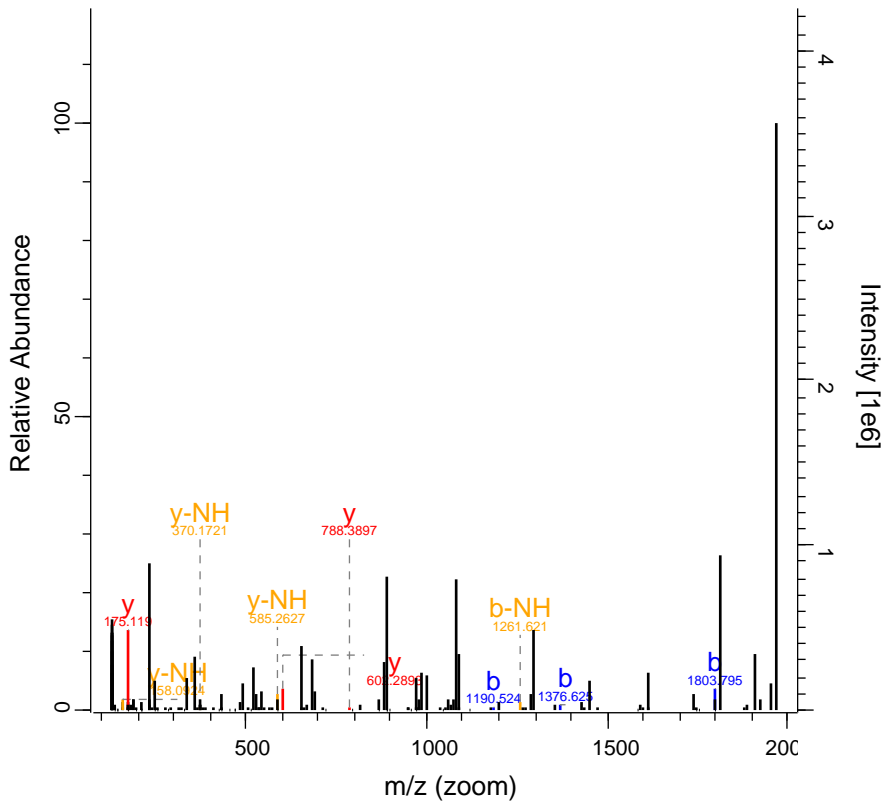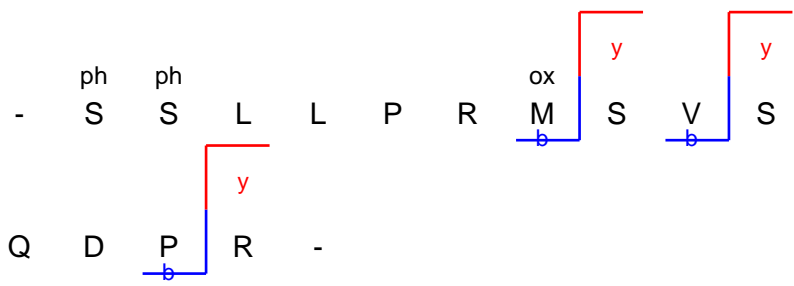

RO-QC-160121\_ZackD\_SS\_Set\_02\_Fractio 19903 FTMS; HC 162.49 858.46 MGST2

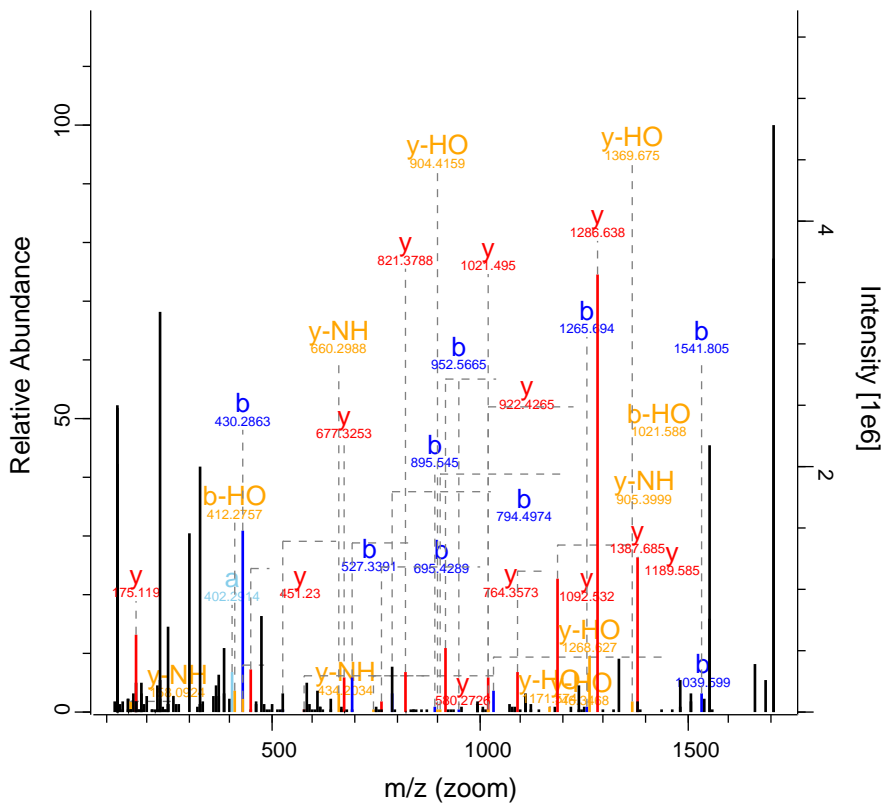

RO-QC-160121\_ZackD\_SS\_Set\_02\_Fraction 20208 FTMS; HC 45.61 723.35 SVEP1

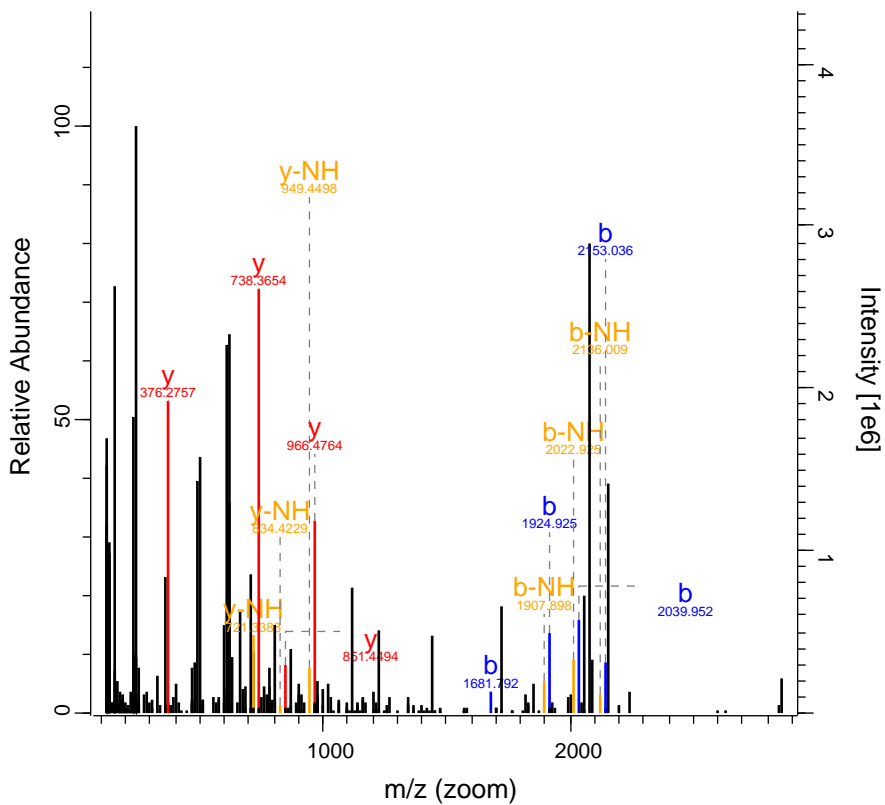

- L C P S G M Y T E Y  
 I H S R N I S D C K -

Fragmentation diagram showing peptide sequence: L C P S G M Y T E Y. The sequence is split into two rows: the top row contains the amino acids L, C, P, S, G, M, Y, T, E, Y; the bottom row contains I, H, S, R, N, I, S, D, C, K. Blue brackets indicate b-ion fragments: b1 (H), b2 (SH), b3 (SR), b4 (SRN), b5 (SRNI), b6 (SRNIS). Red brackets indicate y-ion fragments: y1 (S), y2 (SG), y3 (SGM), y4 (SGET).

RO-QC-160121\_ZackD\_SS\_Set\_02\_Fraction 20854 FTMS; HC 51.87 702.07 ZNF518A

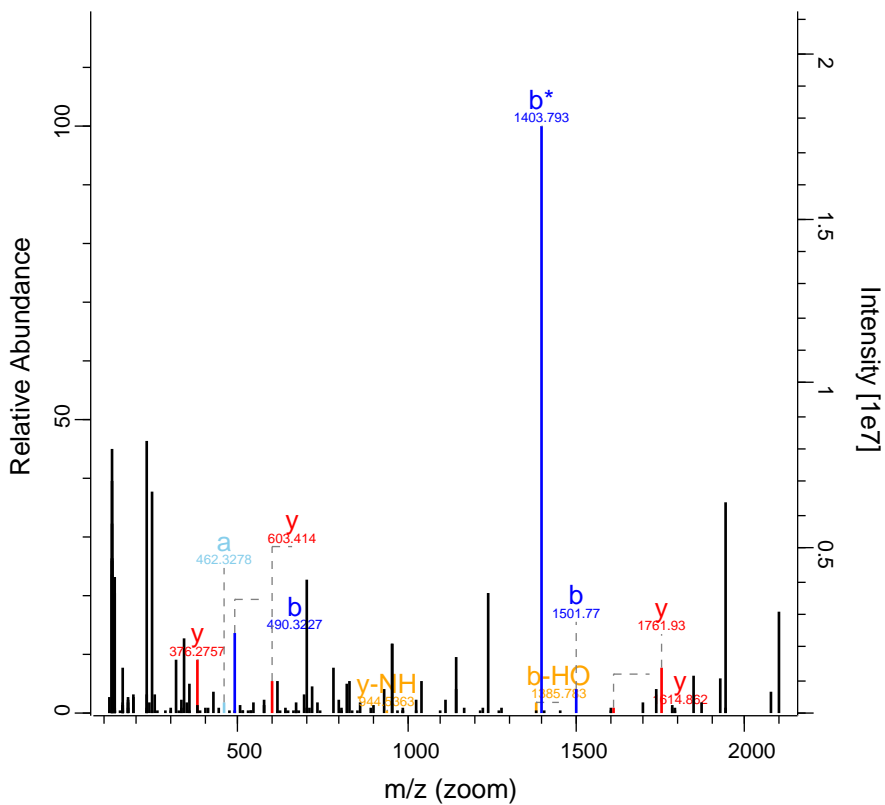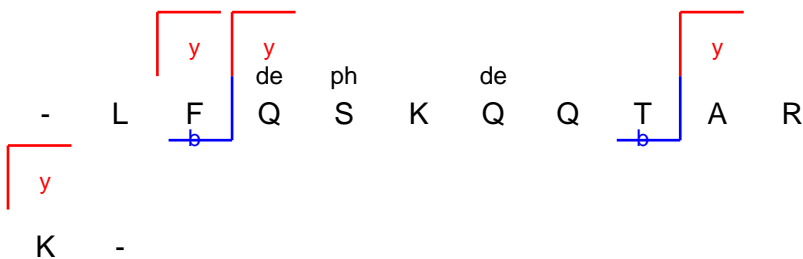

K -

RO-QC-160121\_ZackD\_SS\_Set\_02\_Fractic 21645 FTMS; HC 62.47 1078.05 NACA2

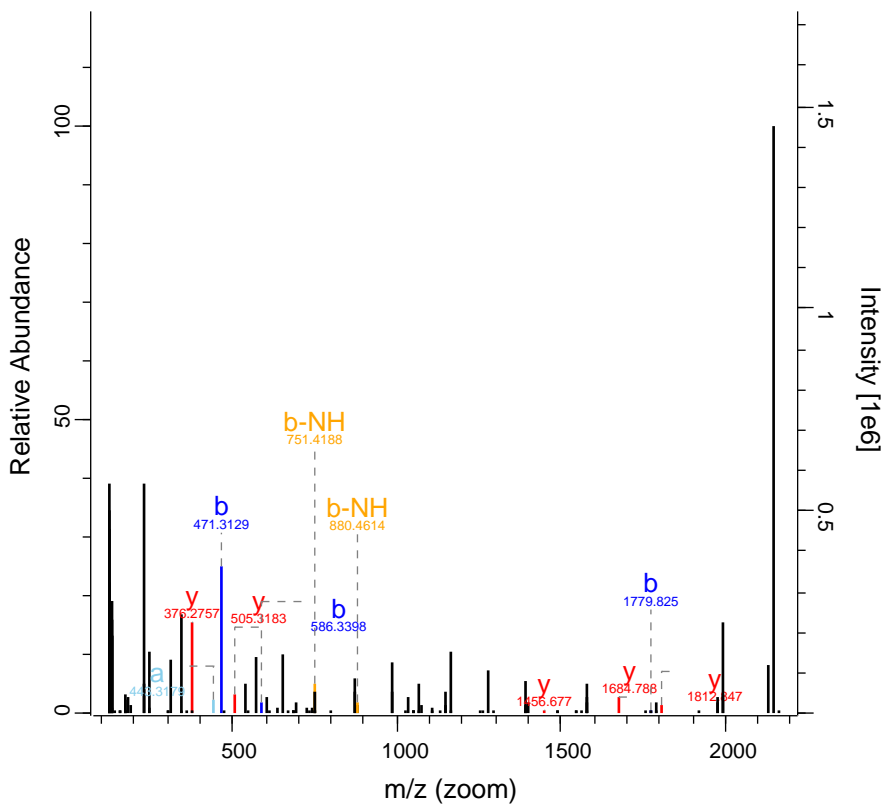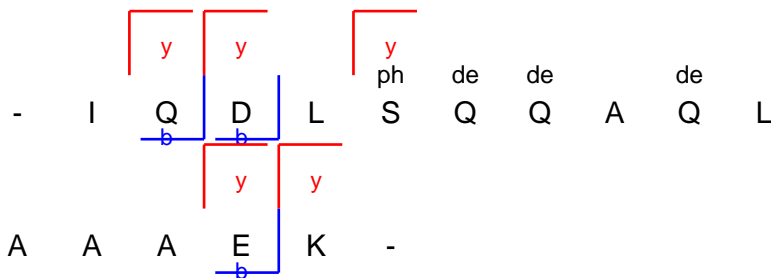



RO-QC-160121\_ZackD\_SS\_Set\_02\_Fraction 22454 FTMS; HC 71.52 453.26 YPEL5

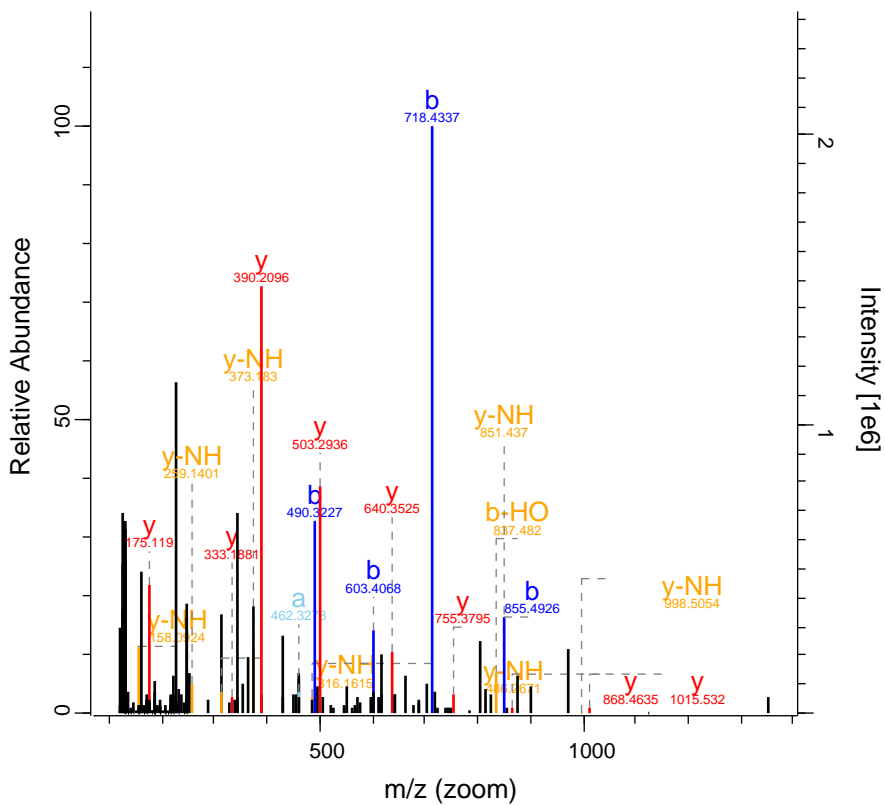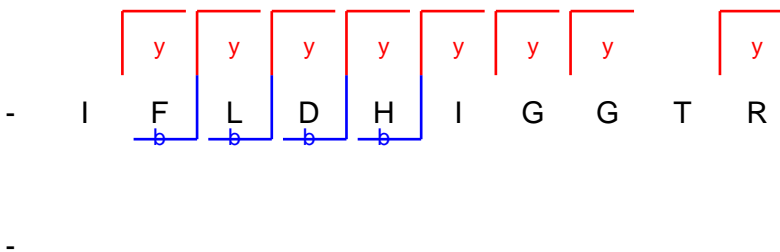

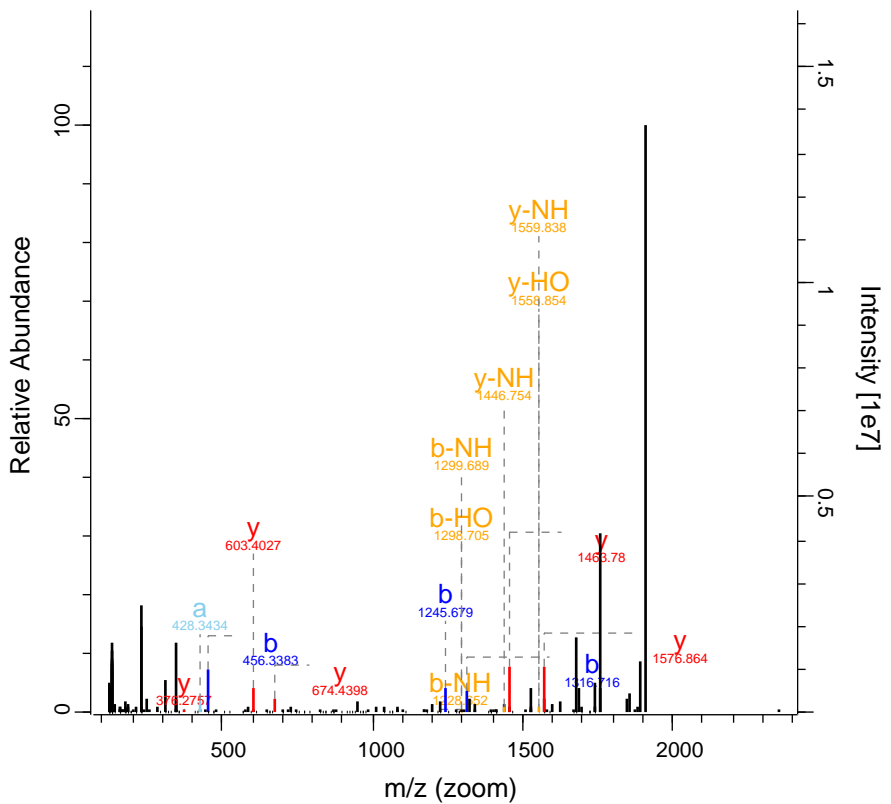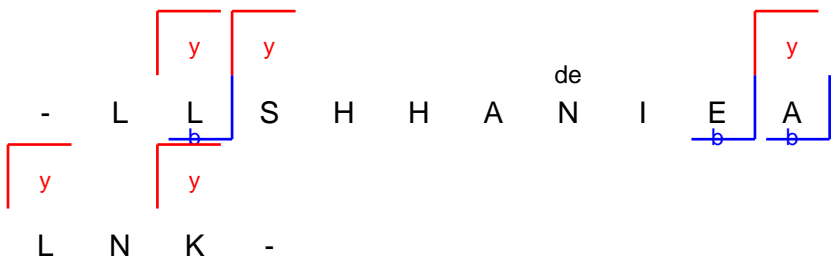



RO-QC-160121\_ZackD\_SS\_Set\_02\_Fraction 24463 FTMS; HC 53.52 803.91 SMIM4

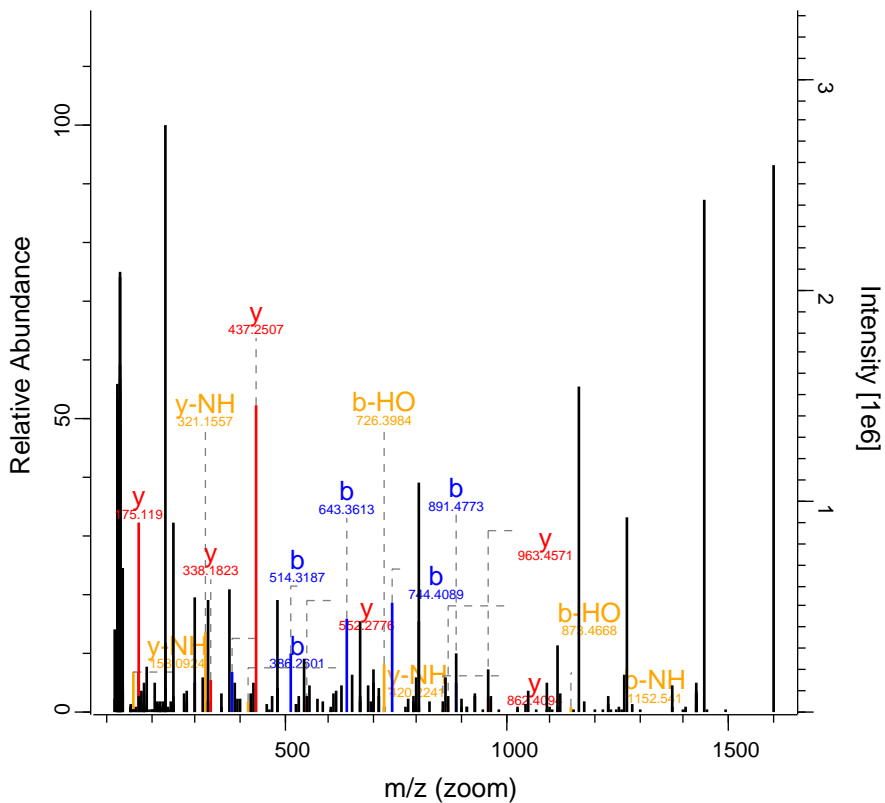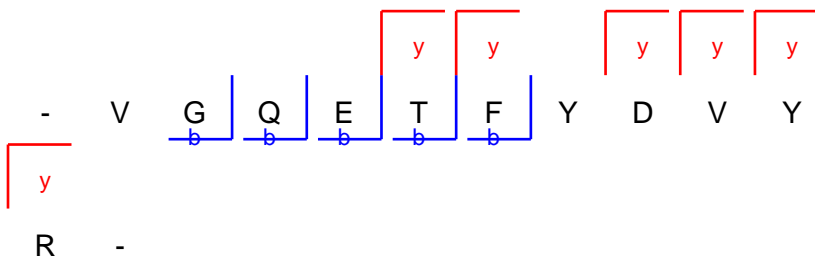



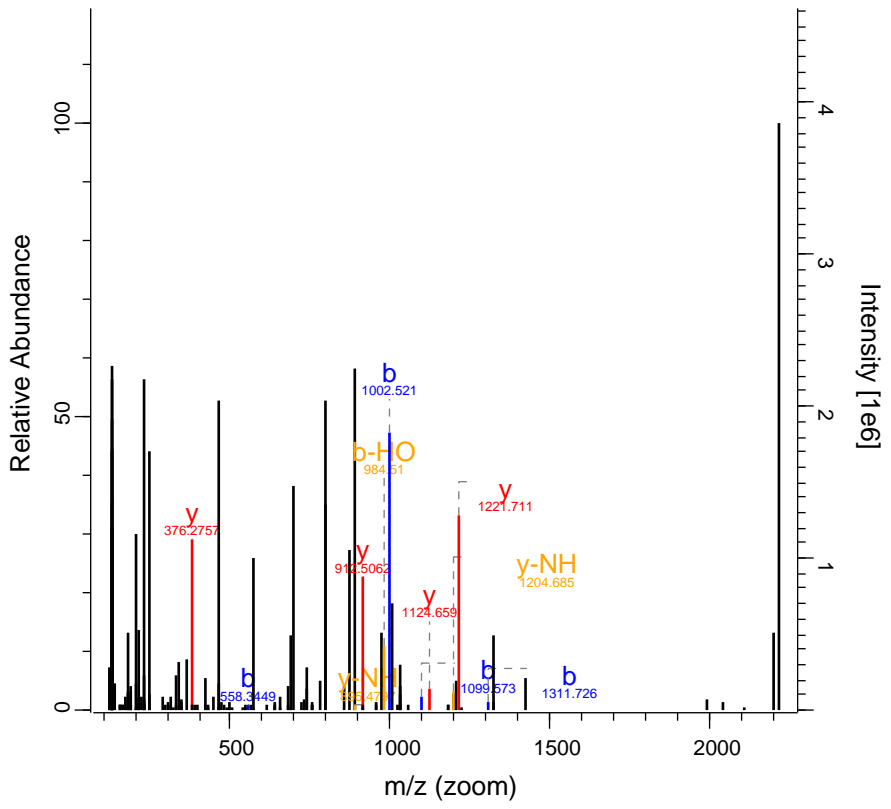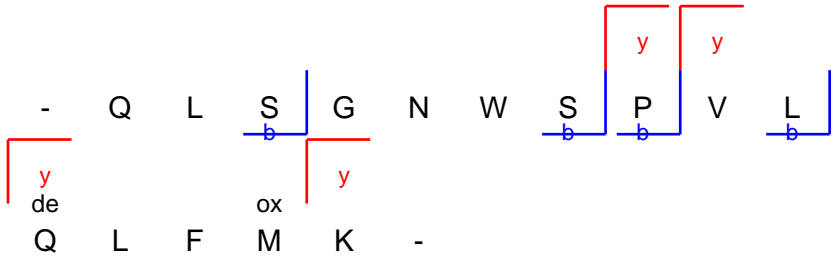

Q L F M K -

RO-QC-160121\_ZackD\_SS\_Set\_02\_Fraction 26481 FTMS; HC 56.48 823.44 CHDC2

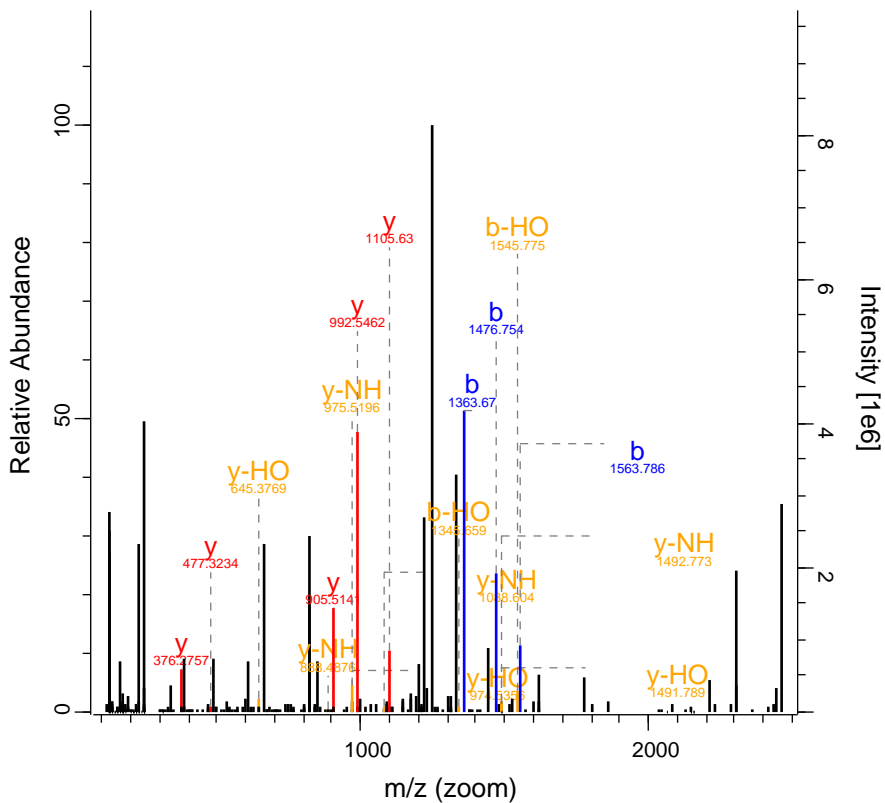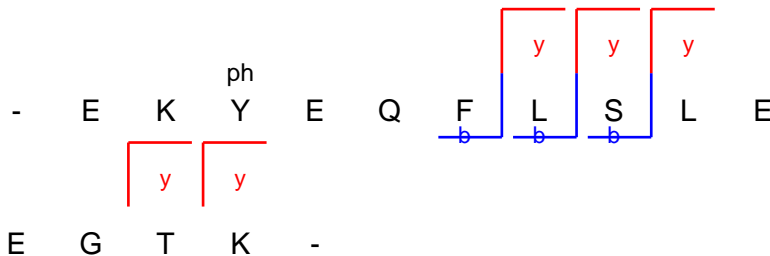

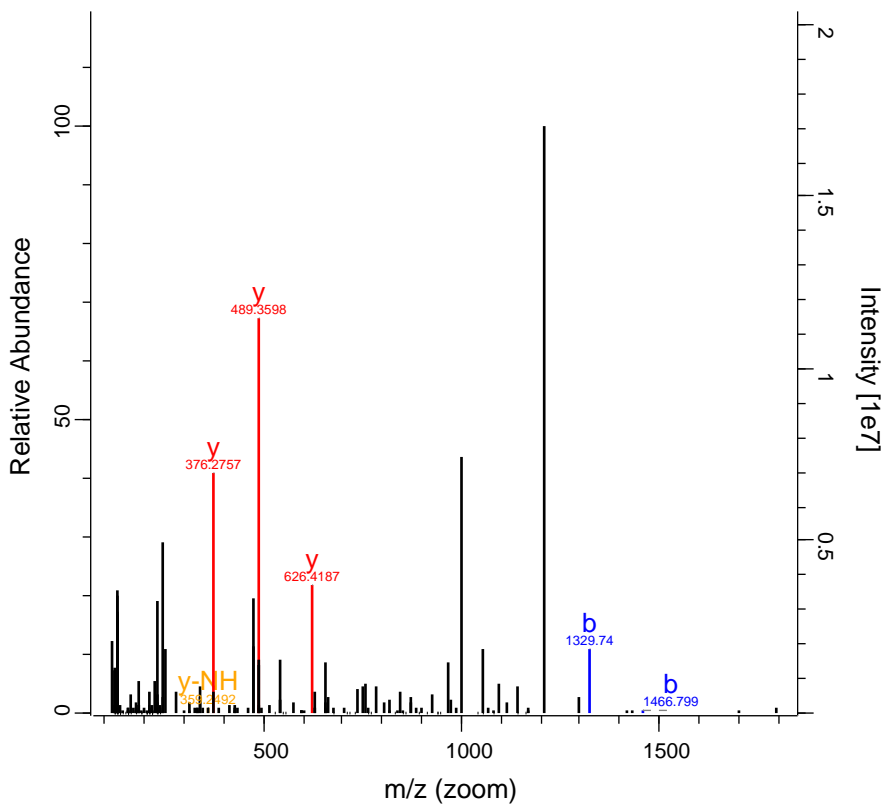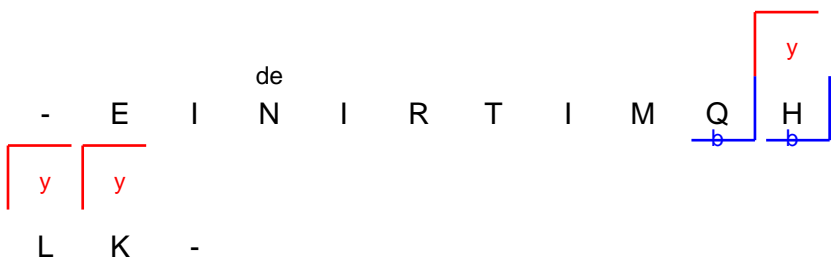

L K -

RO-QC-160121\_ZackD\_SS\_Set\_02\_Fraction 27209 FTMS; HC 40.02 660.12 ABCA13

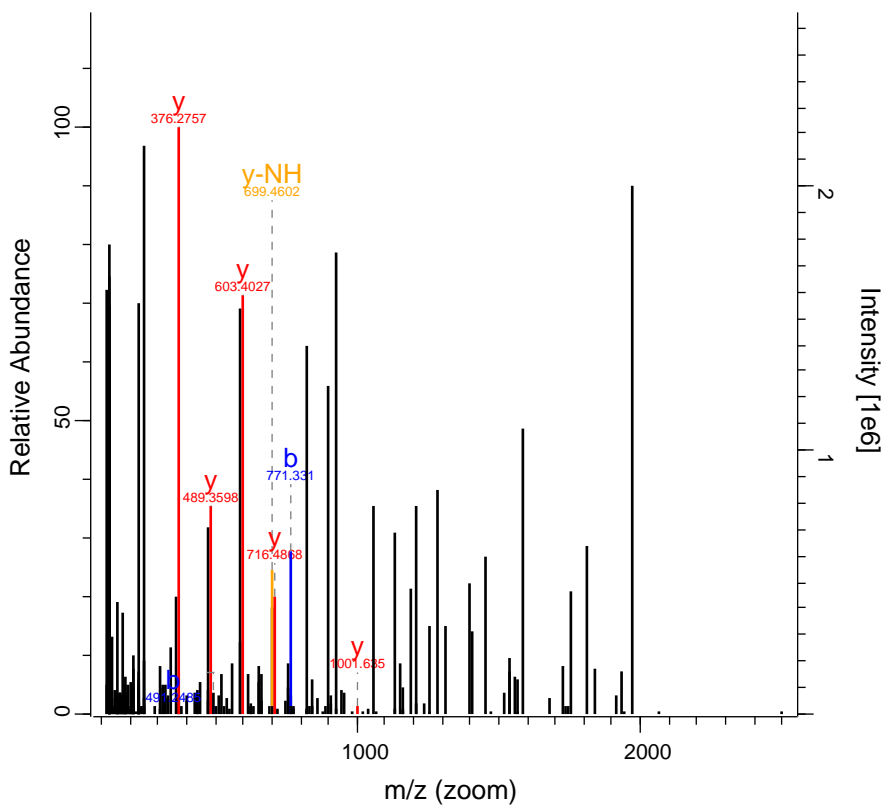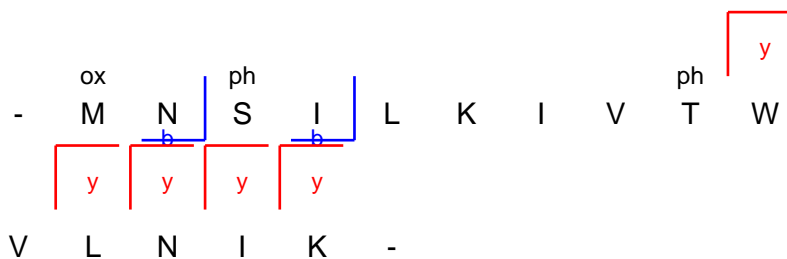

RO-QC-160121\_ZackD\_SS\_Set\_02\_Fraction 27242 FTMS; HC 47.94 562.66 PDE6A

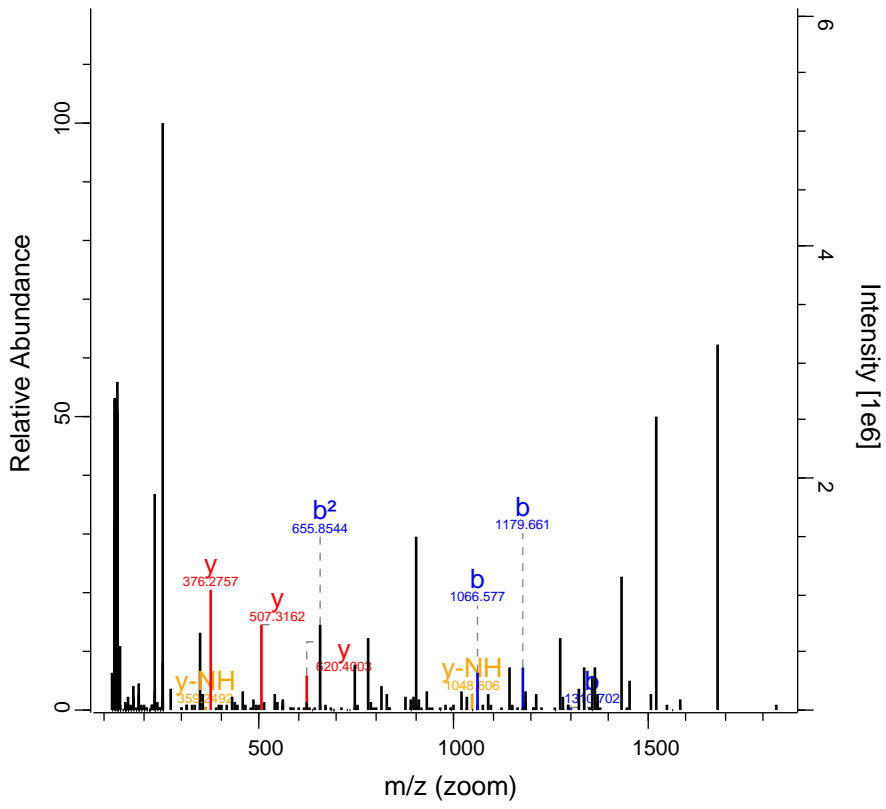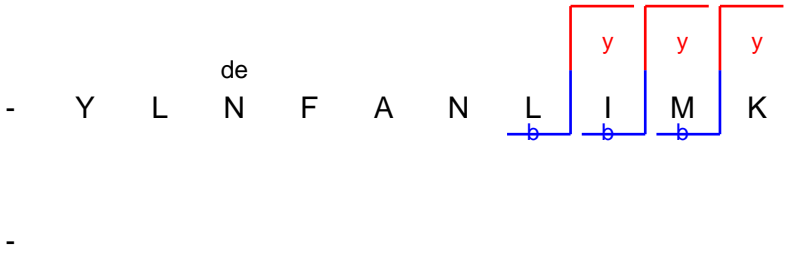





RO-QC-160121\_ZackD\_SS\_Set\_02\_Fraction 27394 FTMS; HC 99.82 558.99 RGR

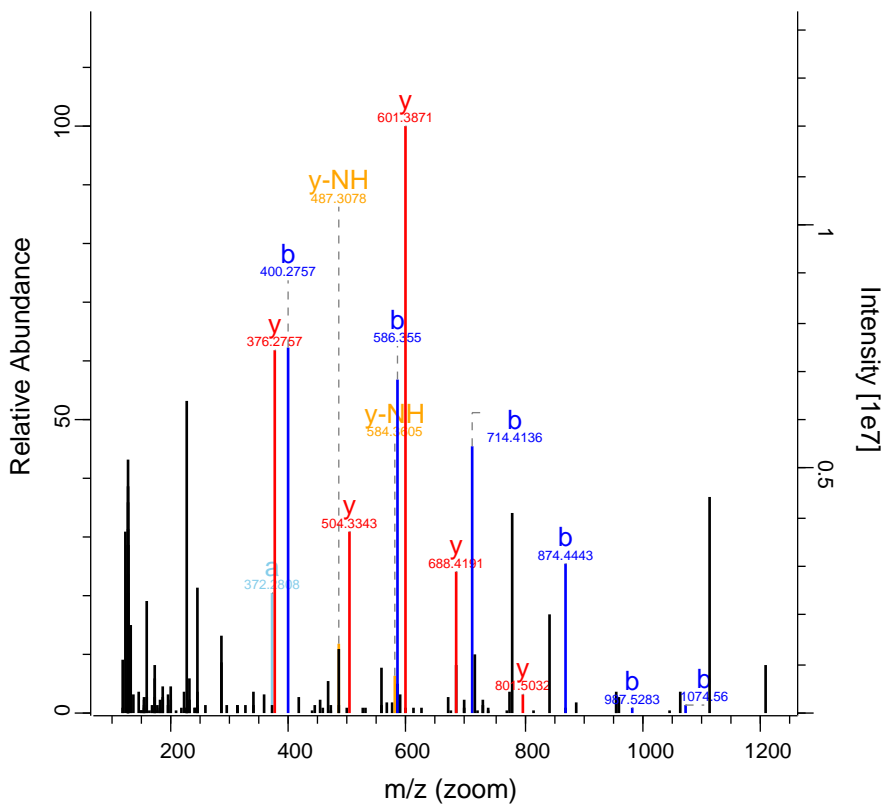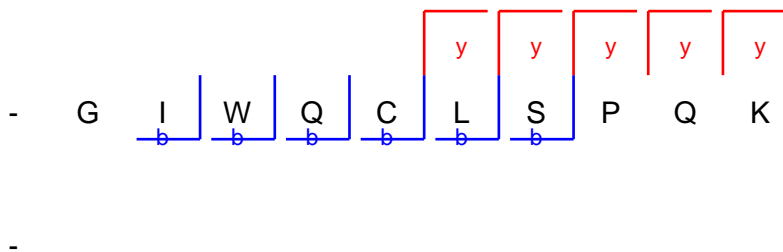

RO-QC-160121\_ZackD\_SS\_Set\_02\_Fraction 27993 FTMS; HC 89.47 692.39 NACAP1

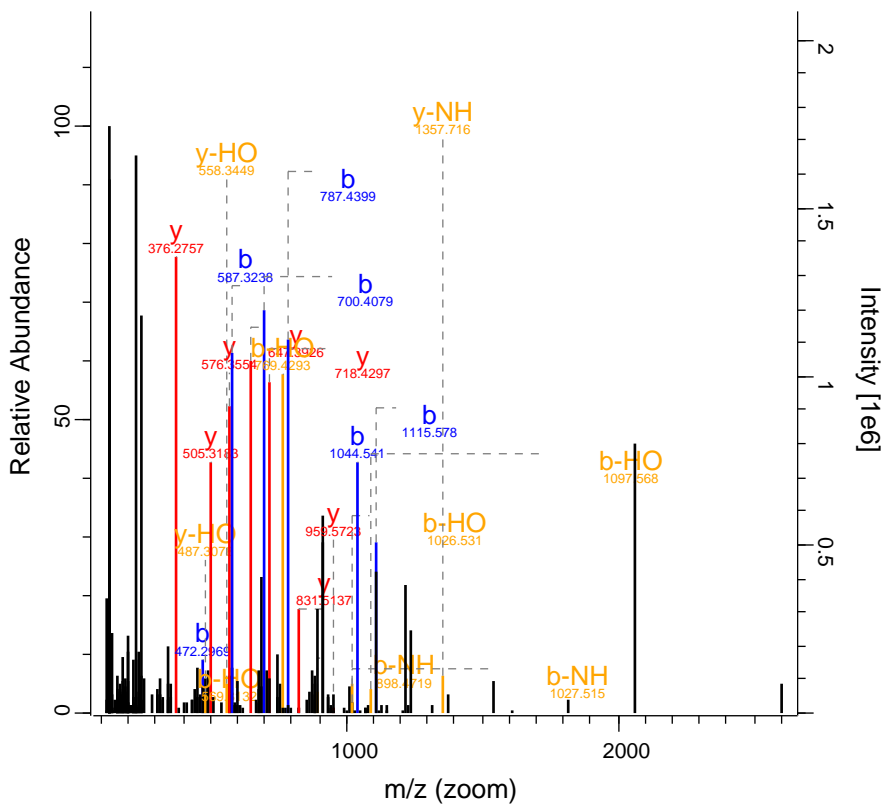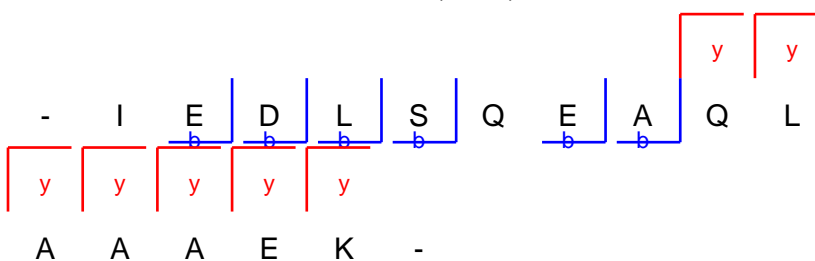

RO-QC-160121\_ZackD\_SS\_Set\_02\_Fractic 28661 FTMS; HC 63.22 1124.62 FABP2

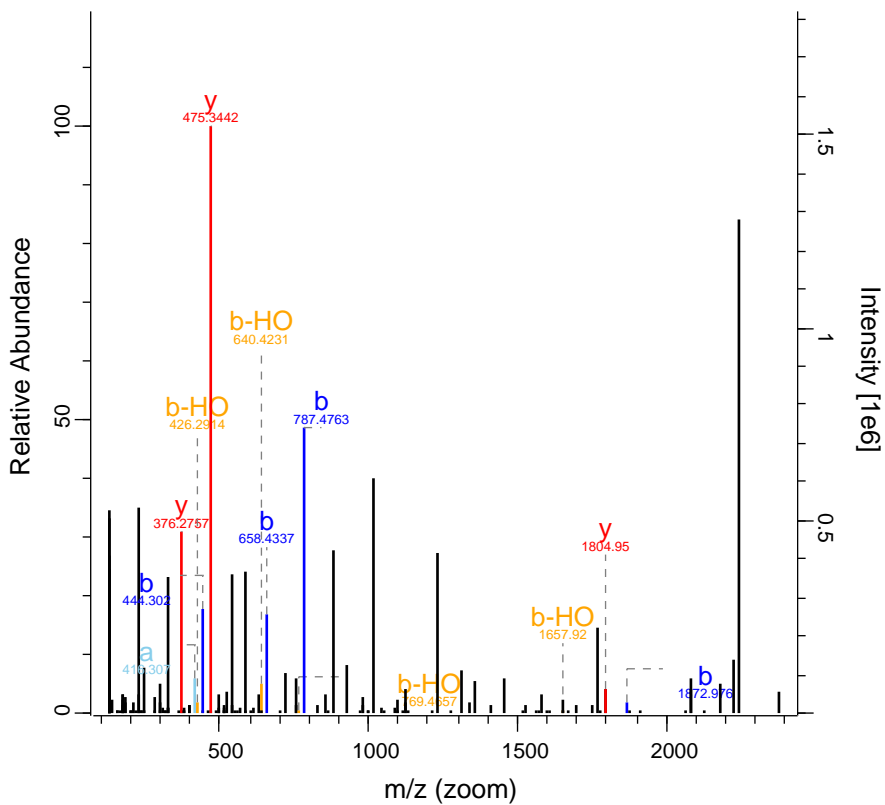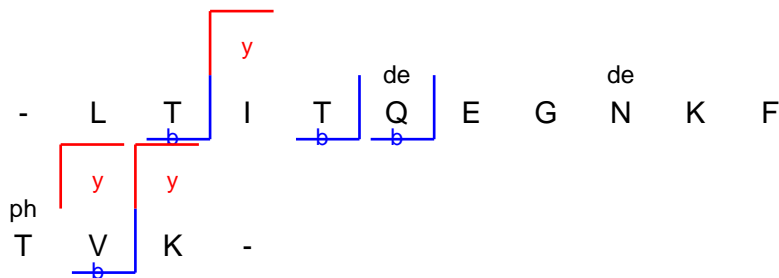

RO-QC-160121\_ZackD\_SS\_Set\_02\_Fraction 28703 FTMS; HC 88.73 429.26 KRT82

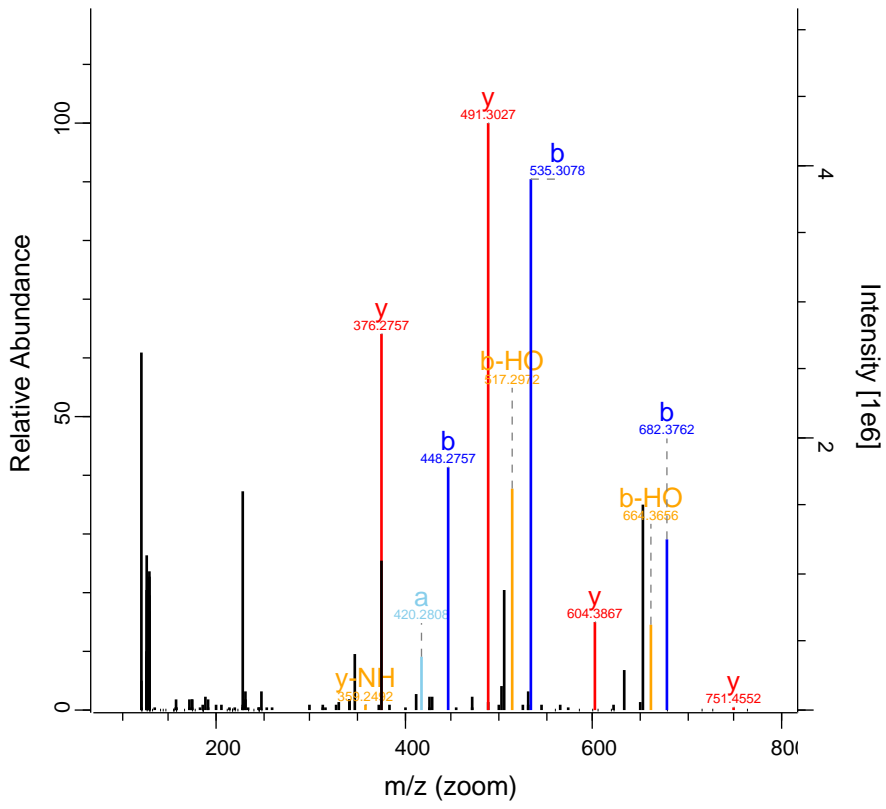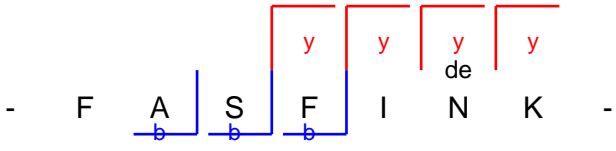



RO-QC-160121\_ZackD\_SS\_Set\_02\_Fraccio 29045 FTMS; HC 124.34 643.38 KRT82

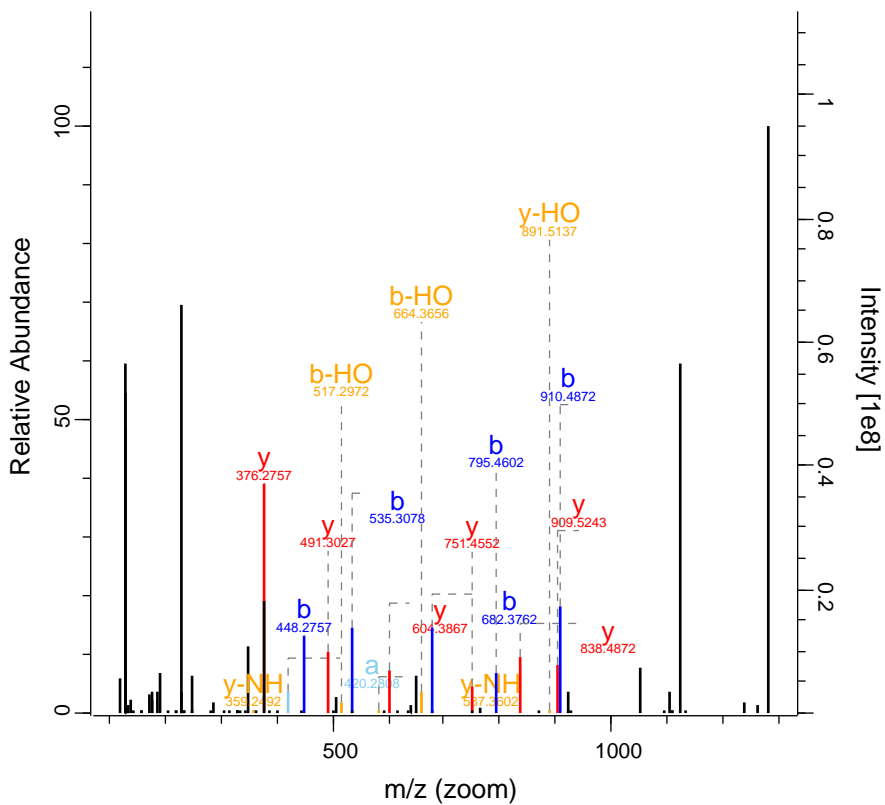

m/z (zoom)

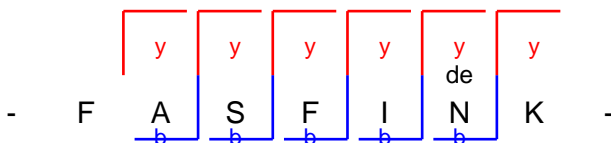

RO-QC-160121\_ZackD\_SS\_Set\_02\_Fractio 30976 FTMS; HC 119.27 701.46 UNC79

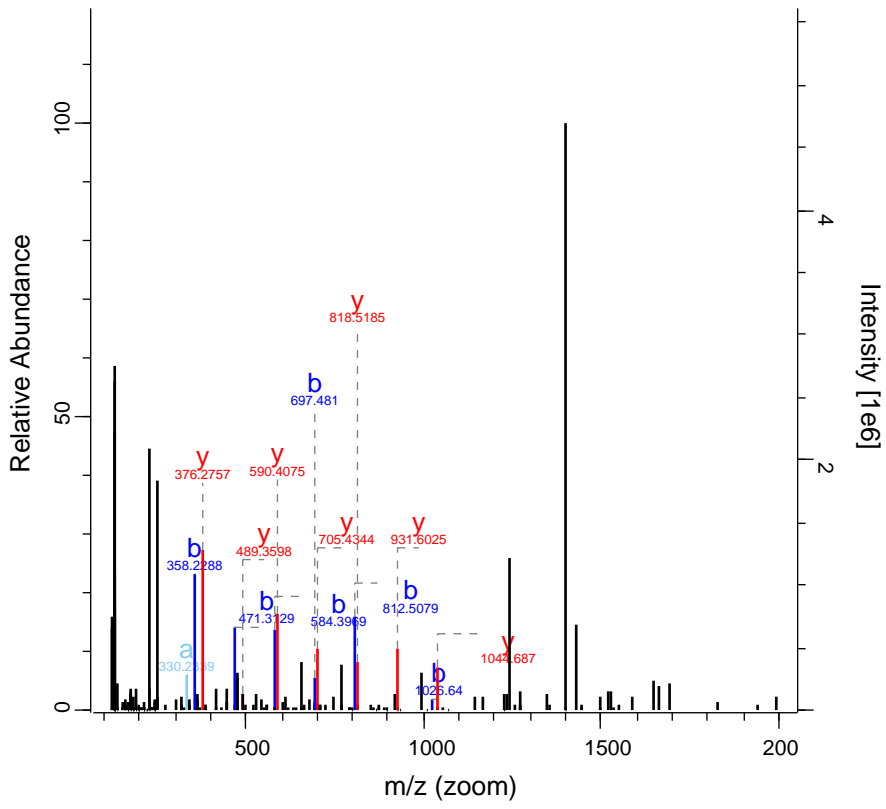

RO-QC-160121\_ZackD\_SS\_Set\_02\_Fractic 32381 FTMS; HC 206.45 1095.65 KRTCAP2

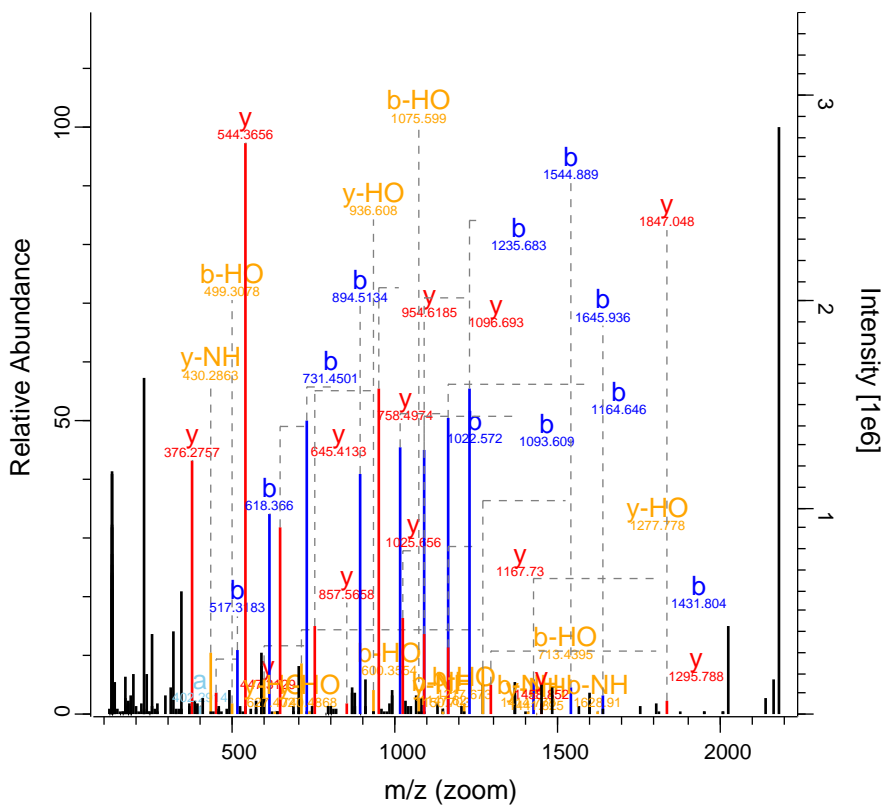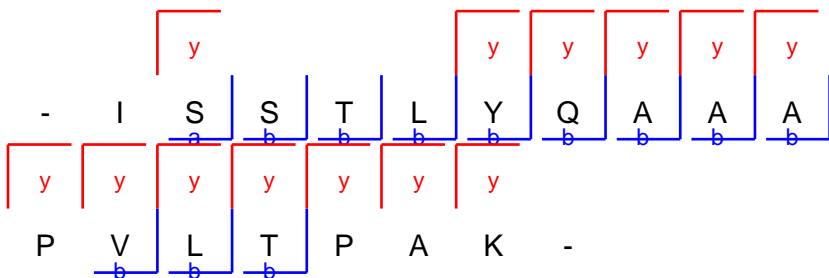



RO-QC-160121\_ZackD\_SS\_Set\_02\_Fraction 32444 FTMS; HC 65.72 548.33 KRTCAP2

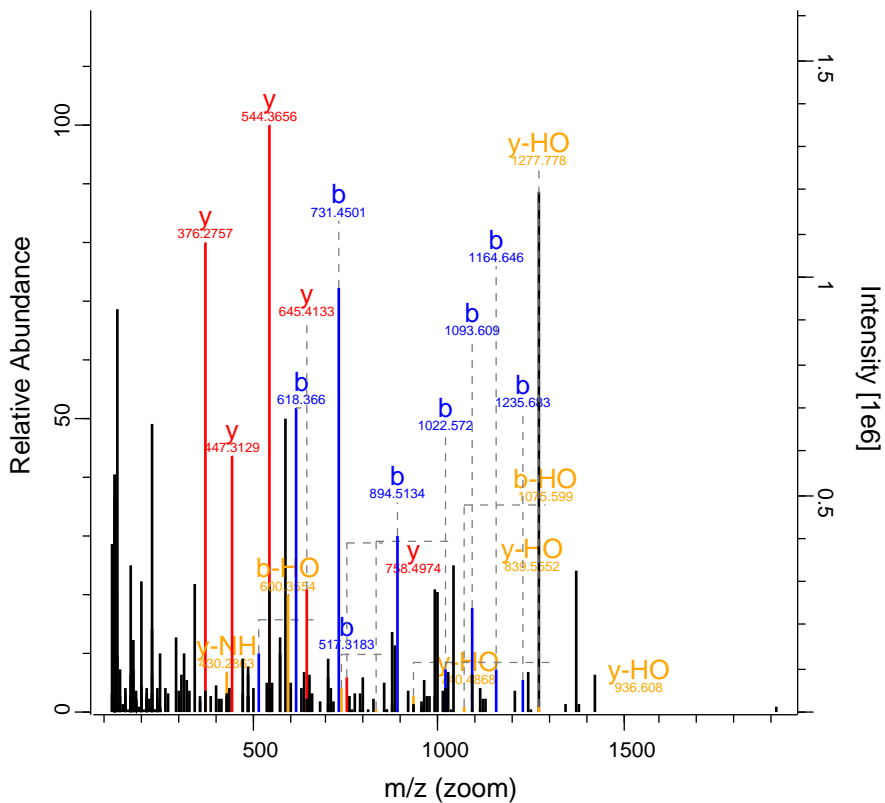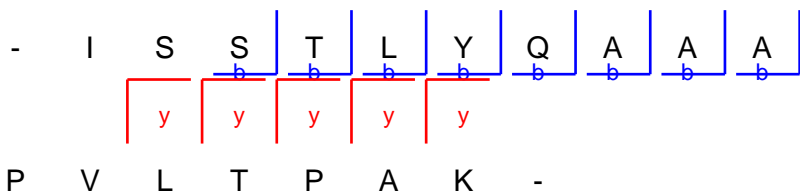

RO-QC-160121\_ZackD\_SS\_Set\_02\_Fraction 32567 FTMS; HC 55.33 730.77 KRTCAP2

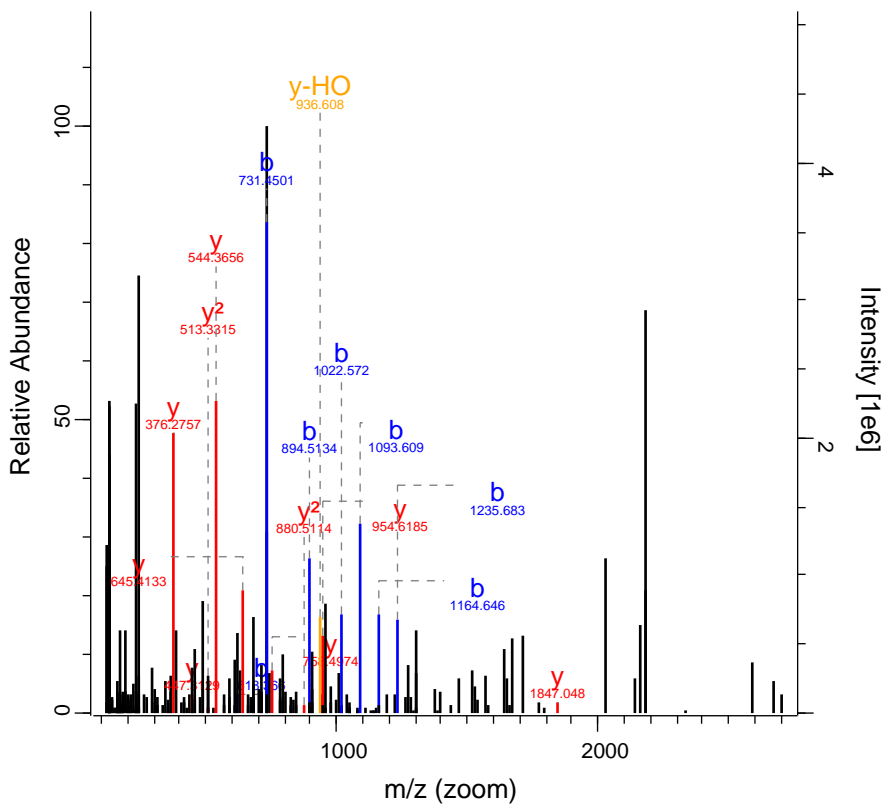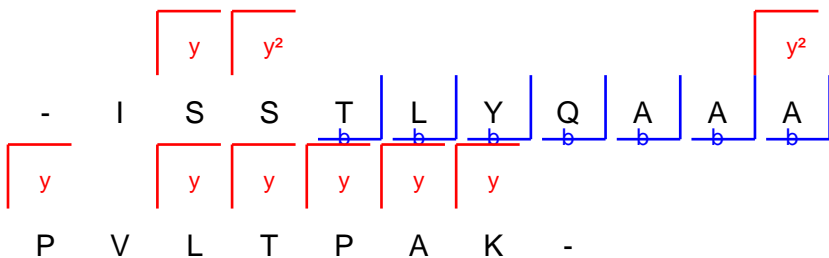



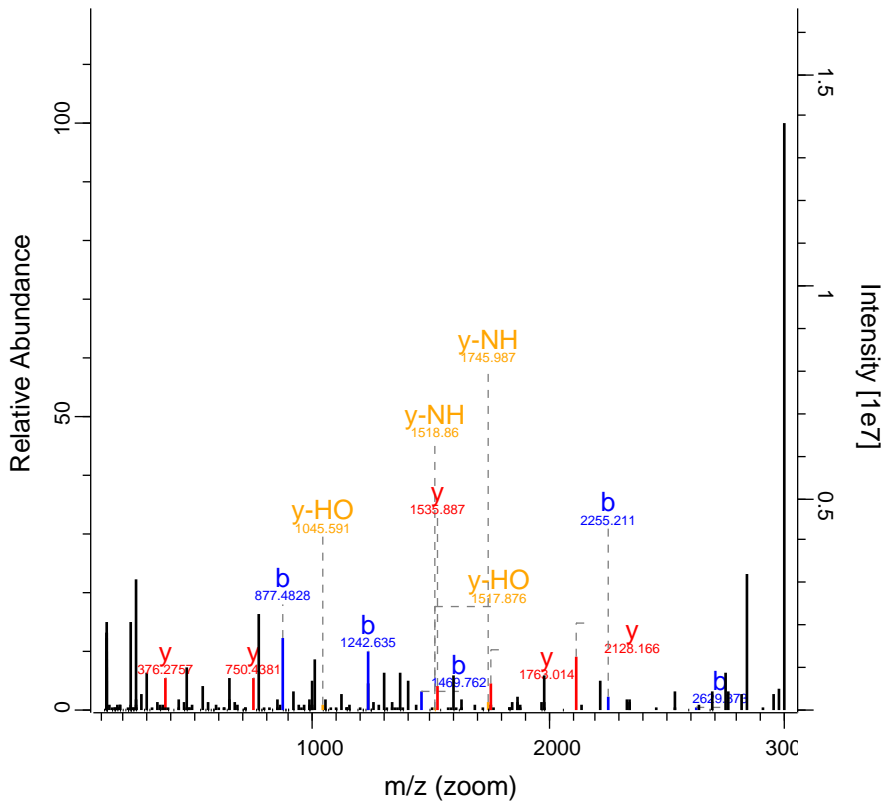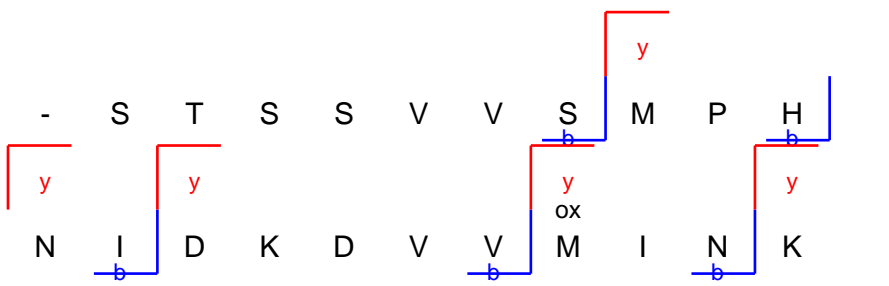

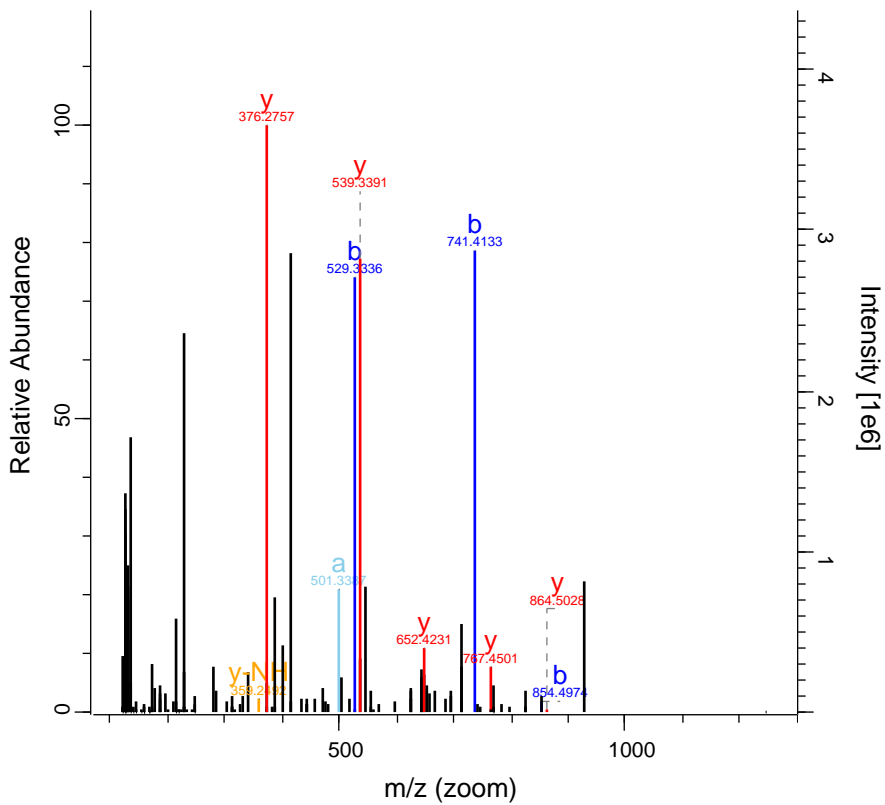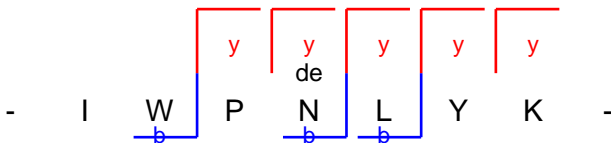

RO-QC-160121\_ZackD\_SS\_Set\_02\_Fraction 33514 FTMS; HC 77.74 552.01 KLHDC4

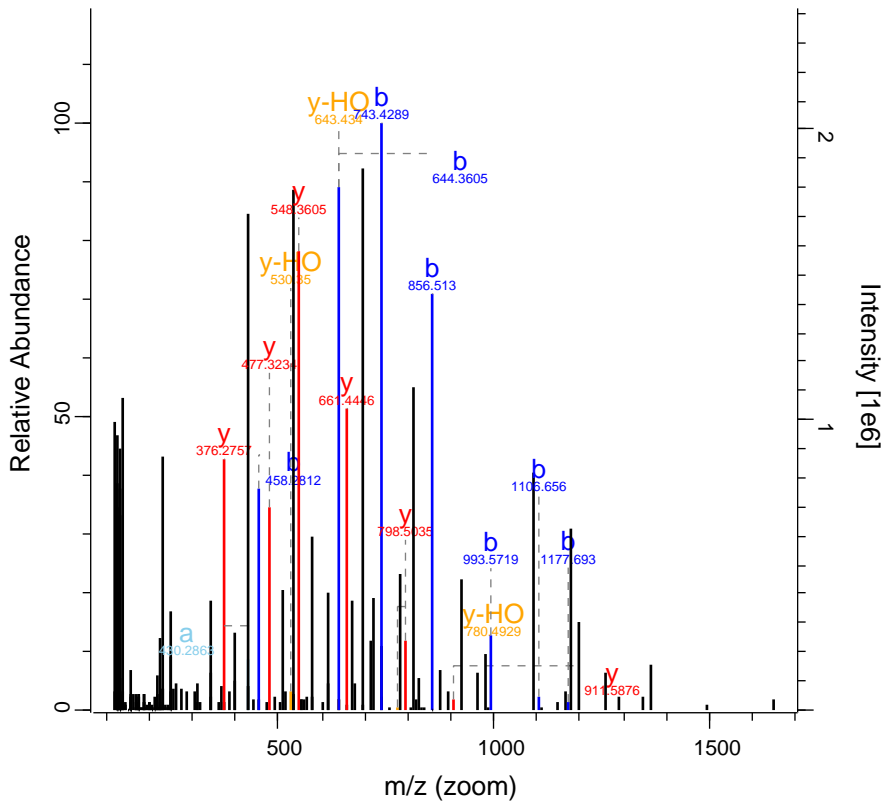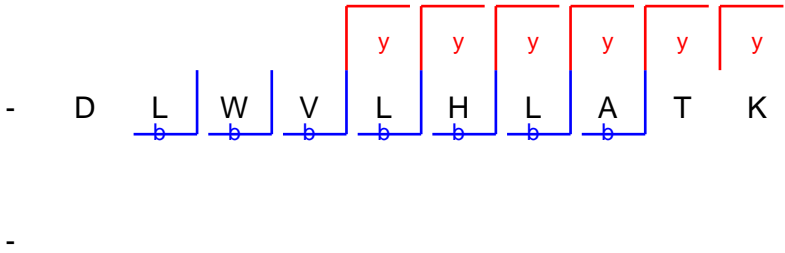

RO-QC-160121\_ZackD\_SS\_Set\_02\_Fraction 33613 FTMS; HC 48.29 975.53 NCOA1

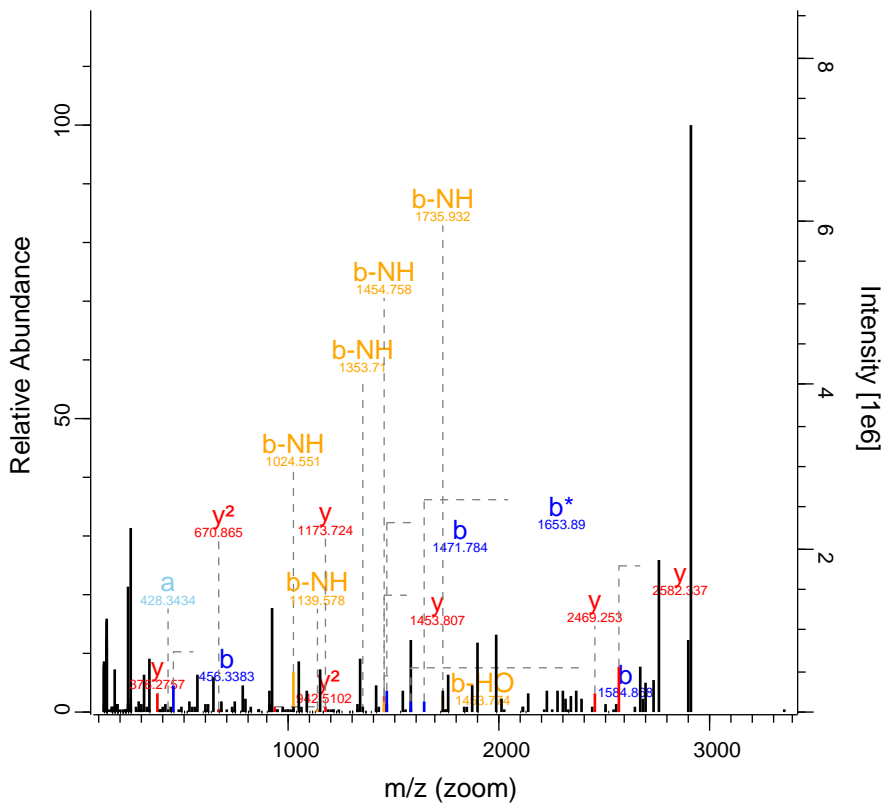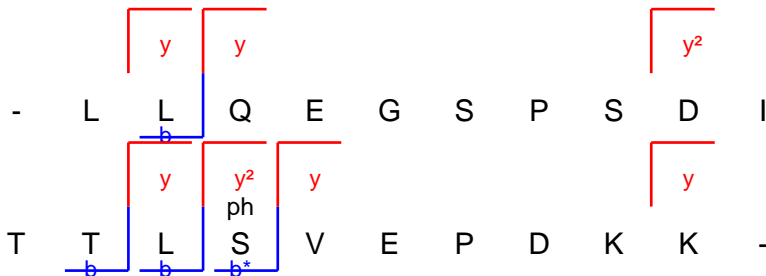

RO-QC-160121\_ZackD\_SS\_Set\_02\_Fractic 34186 FTMS; HC 50.21 1155.63 EBF2

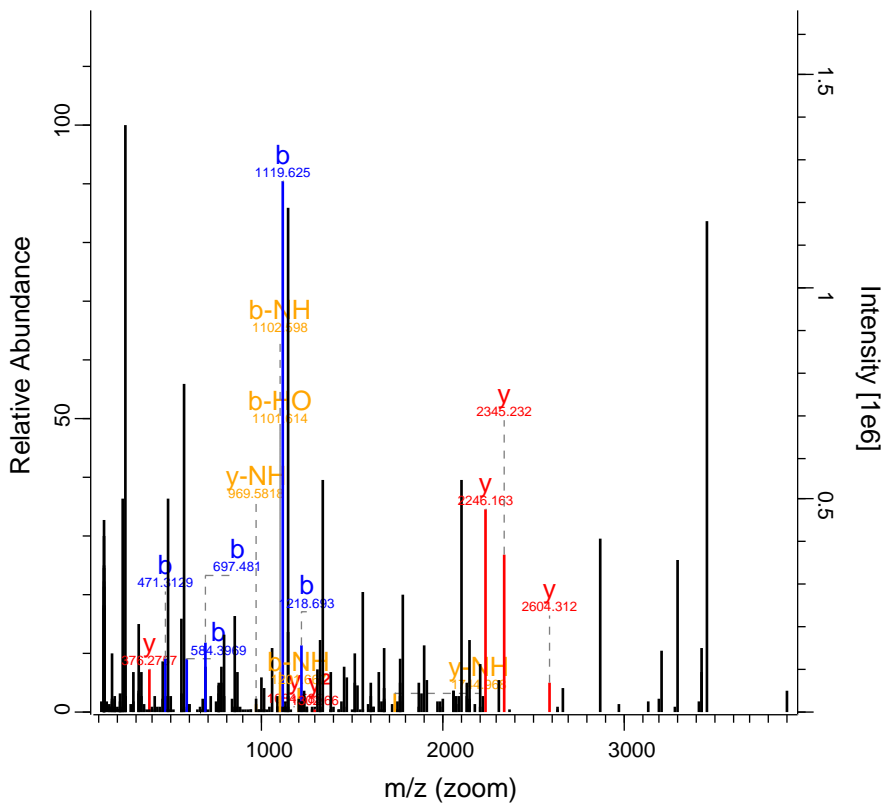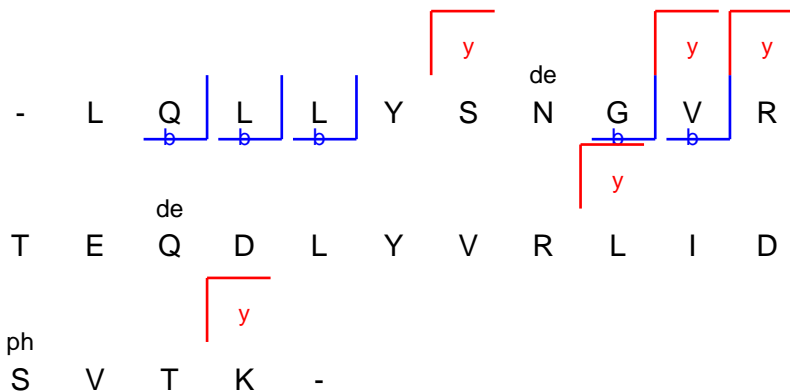





RO-QC-160121\_ZackD\_SS\_Set\_02\_Fraction 35625 FTMS; HC 55.98 496.95 GTF2A1

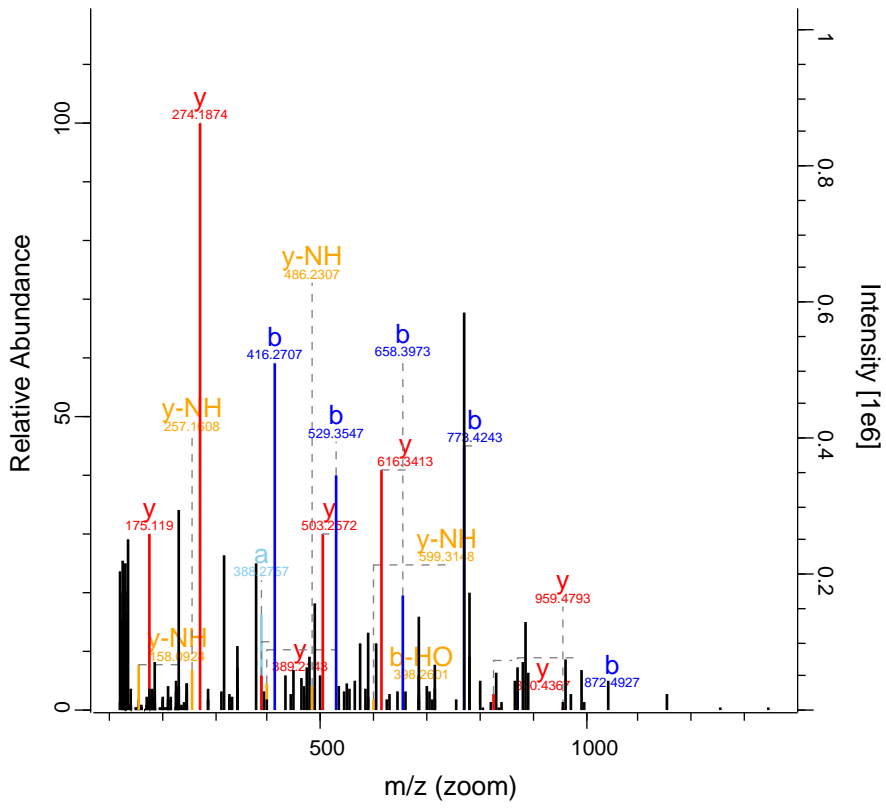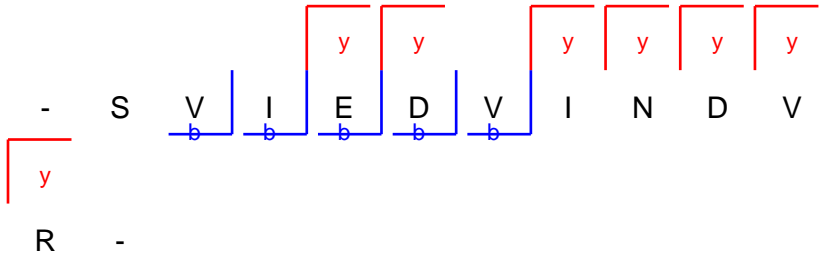

R -

RO-QC-160121\_ZackD\_SS\_Set\_02\_Fraction 35754 FTMS; HC 62.23 636.32 NOP10

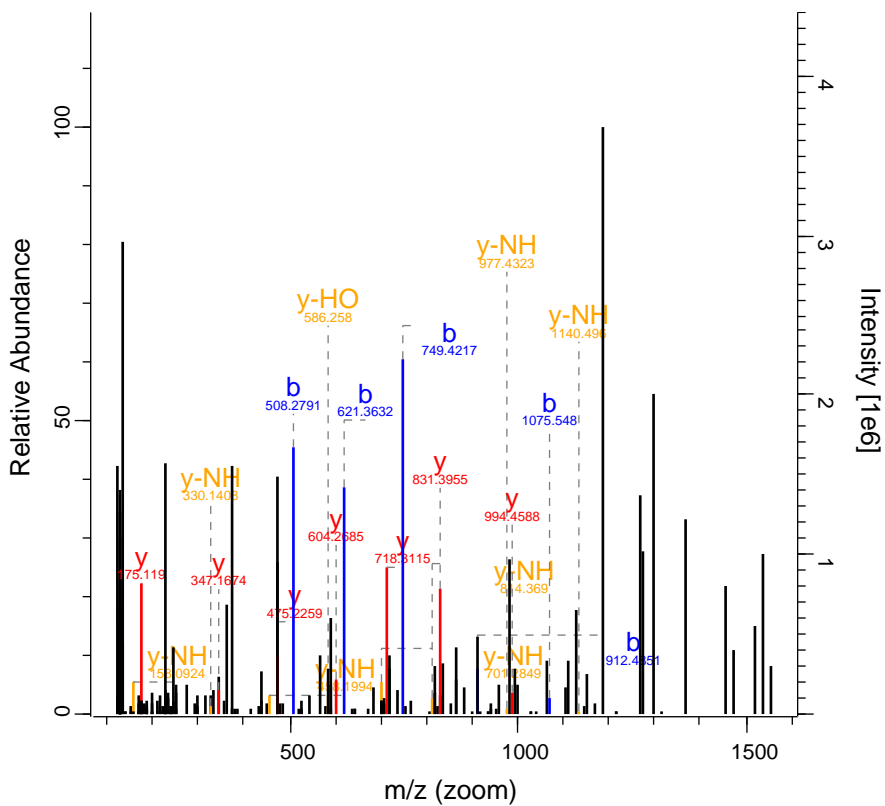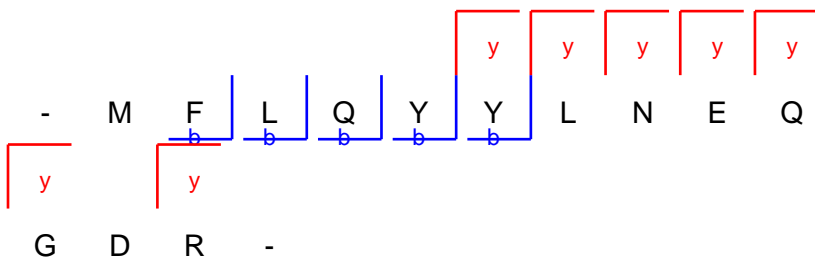

RO-QC-160121\_ZackD\_SS\_Set\_02\_Fraction 35997 FTMS; HCl 38.89 875.1 KCNK1

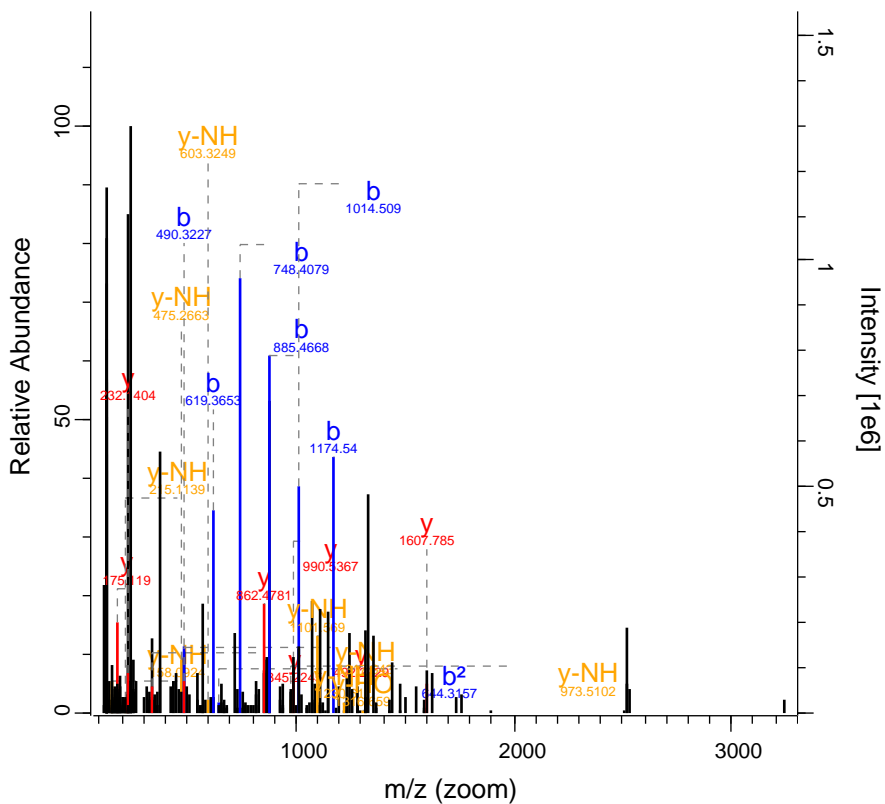

RO-QC-160121\_ZackD\_SS\_Set\_02\_Fraction 36079 FTMS; HC 71.43 696.44 TMBIM6

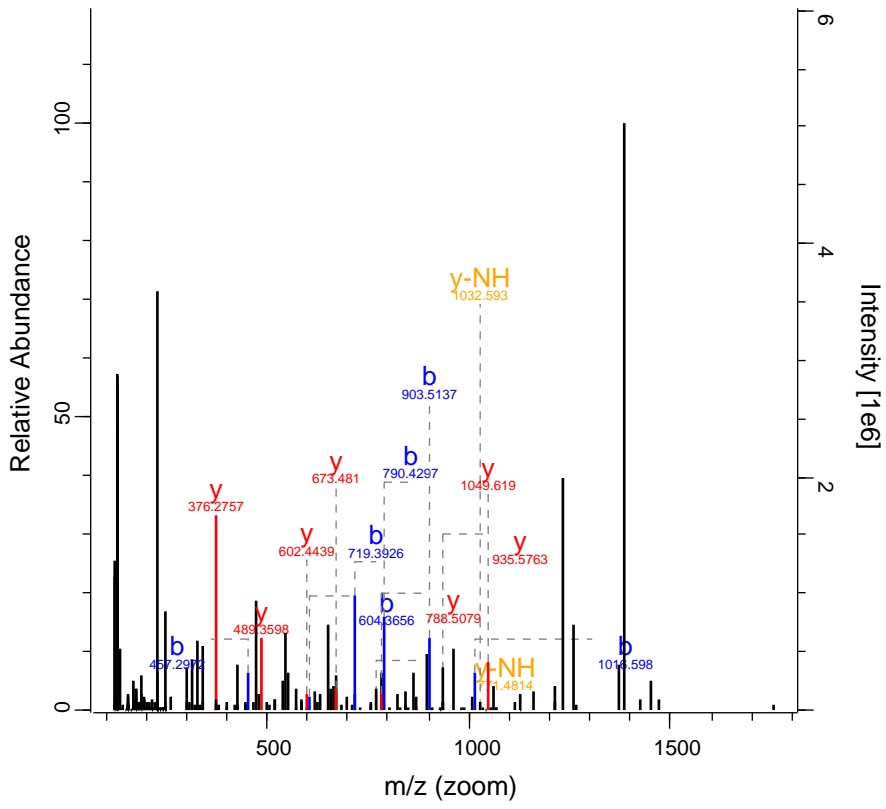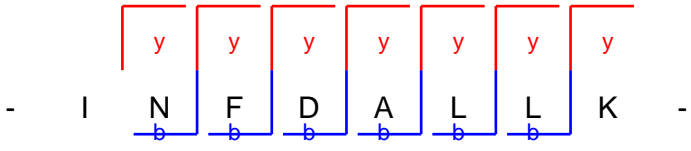

RO-QC-160121\_ZackD\_SS\_Set\_02\_Fraction 36206 FTMS; HC 84.74 464.63 TMBIM6

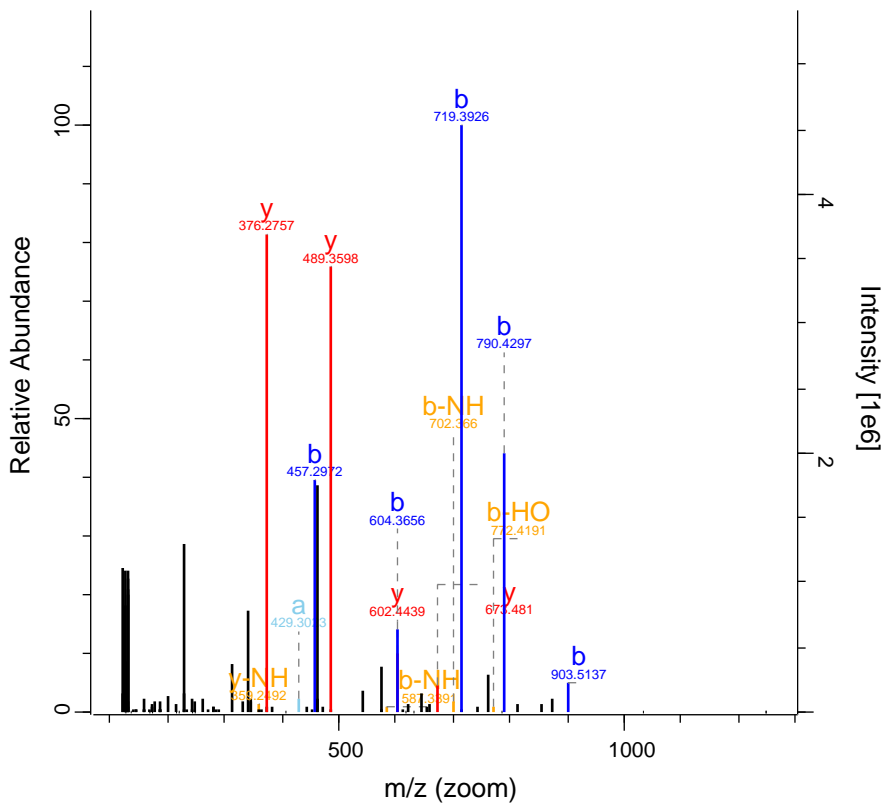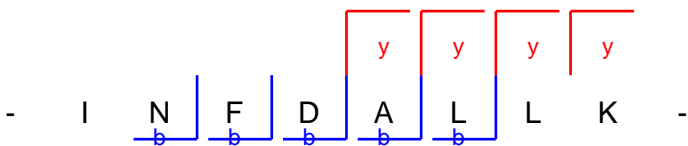

RO-QC-160121\_ZackD\_SS\_Set\_02\_Fractio 36378 FTMS; HC 116.73 603.38 SLC37A3

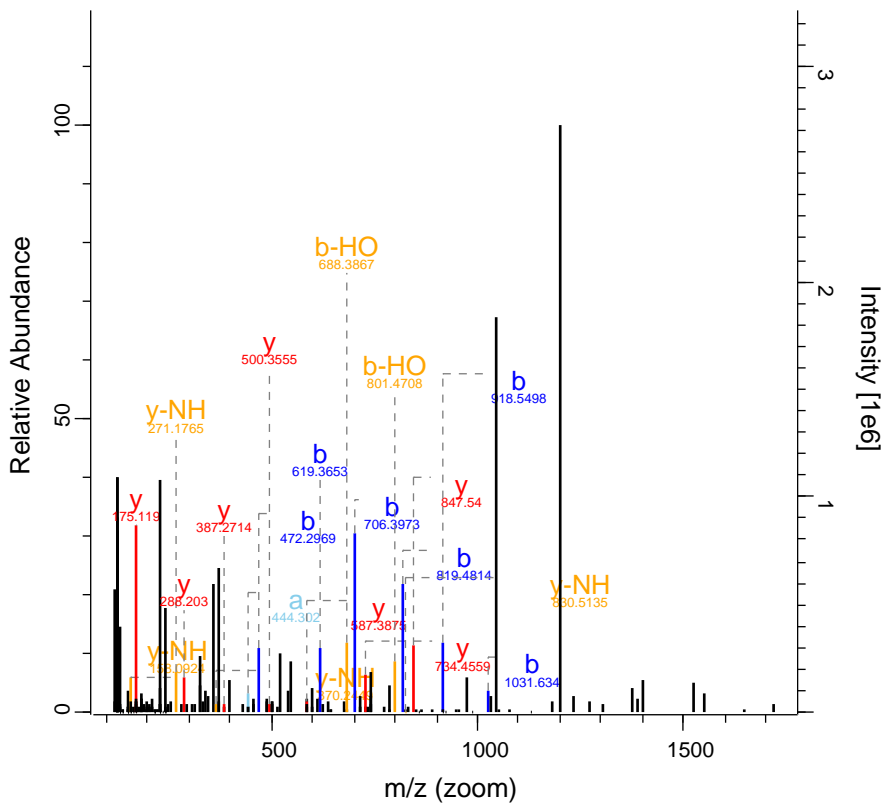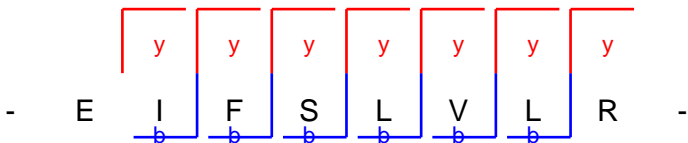

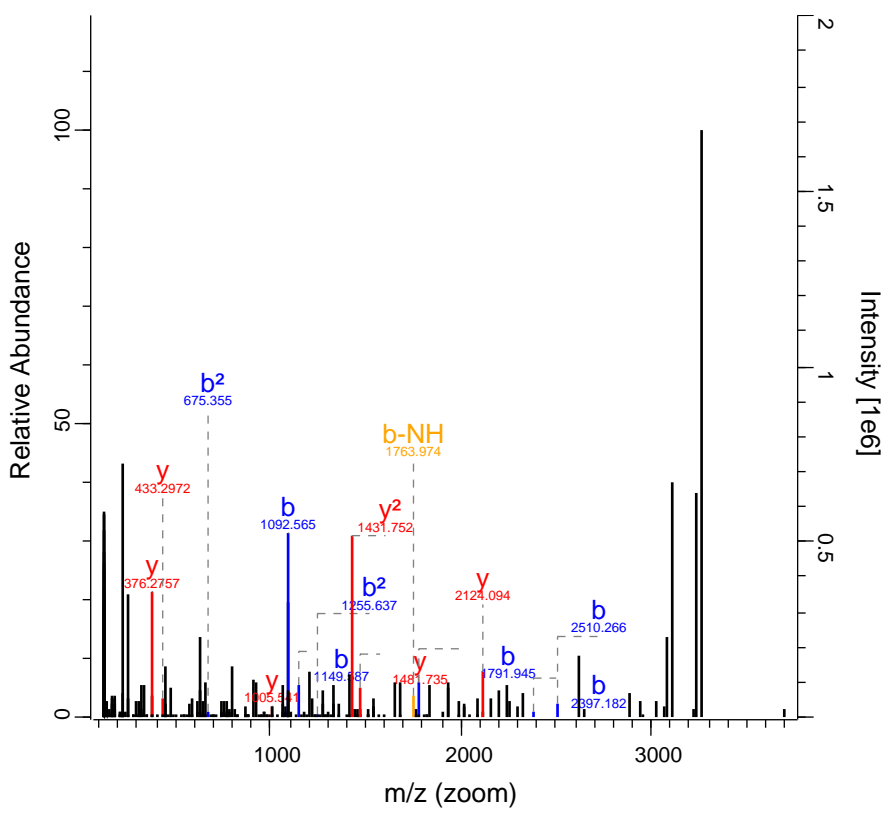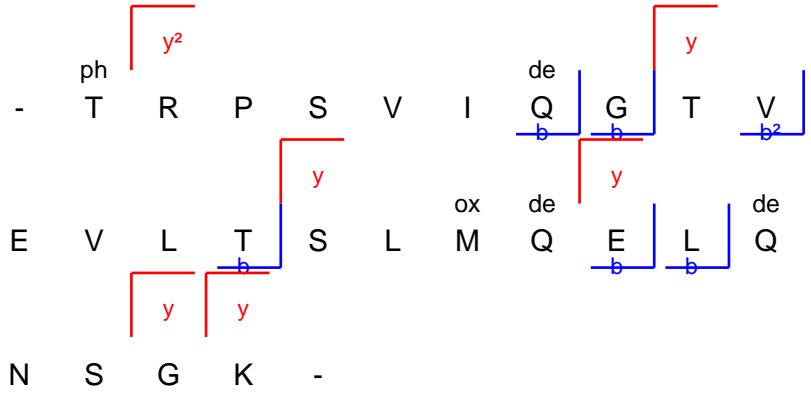



RO-QC-160121\_ZackD\_SS\_Set\_02\_Fracti 37552 FTMS; HC 177.11 1037.53 SFT2D1

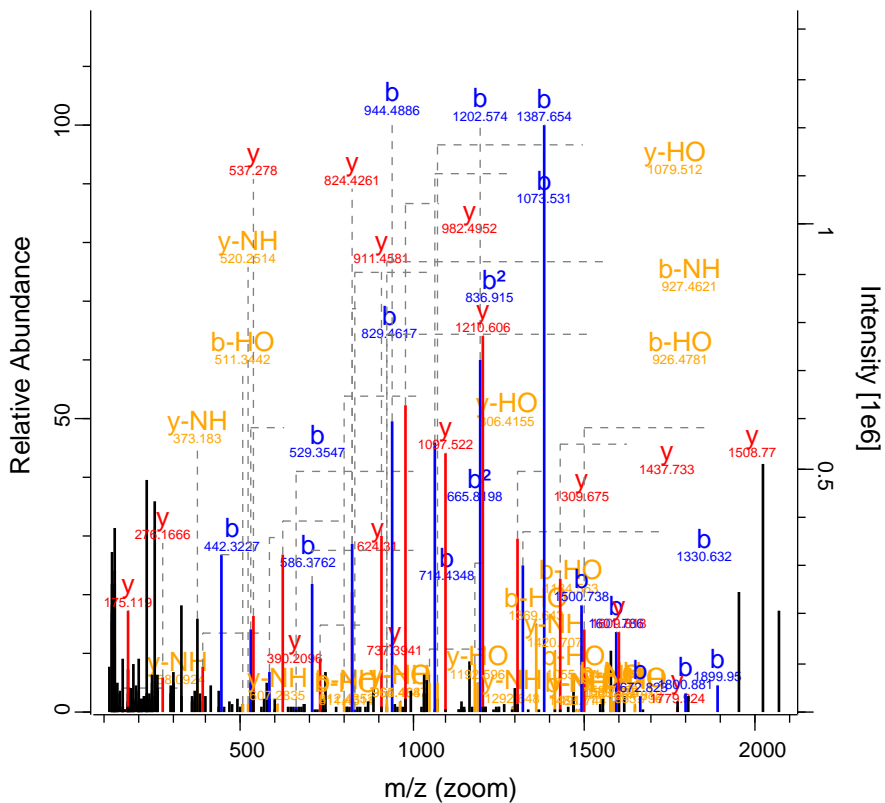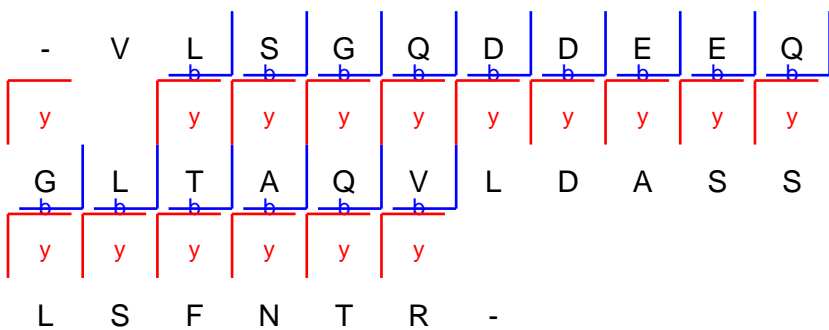

RO-QC-160121\_ZackD\_SS\_Set\_02\_Fractic 37883 FTMS; HC 156.51 1098.06 DAZAP2

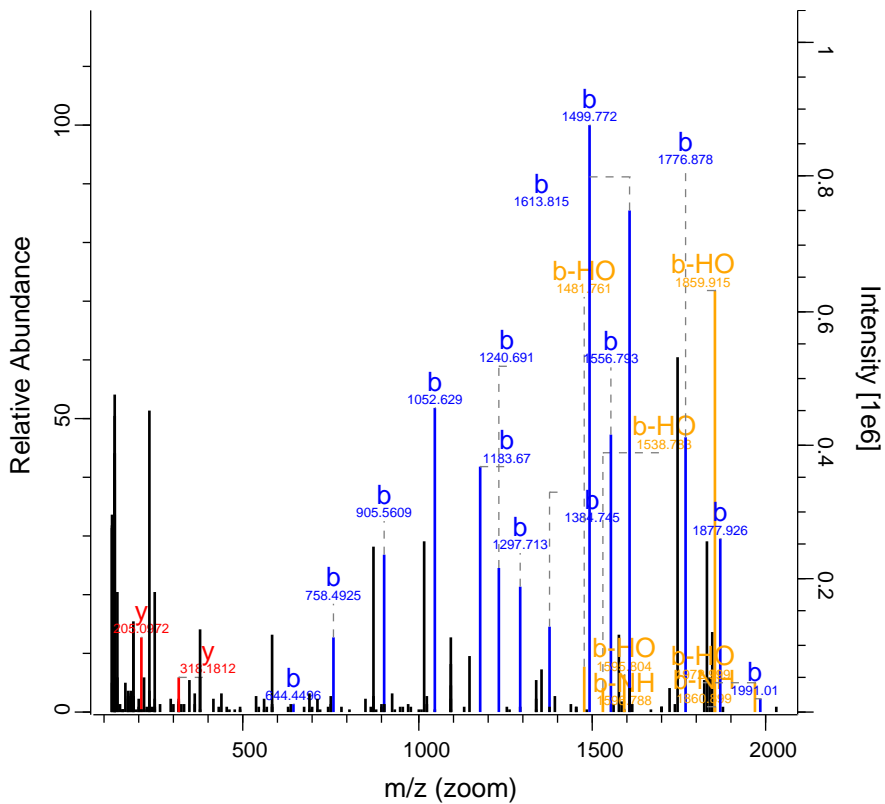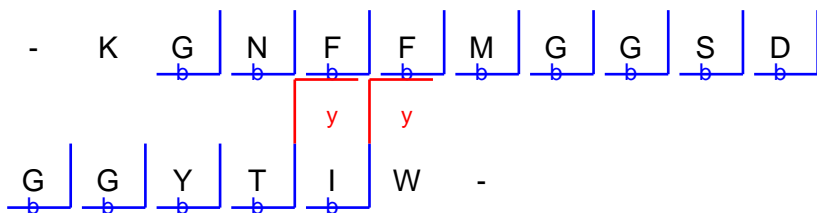

RO-QC-160121\_ZackD\_SS\_Set\_02\_Fraction 37899 FTMS; HC 71.34 732.37 DAZAP2

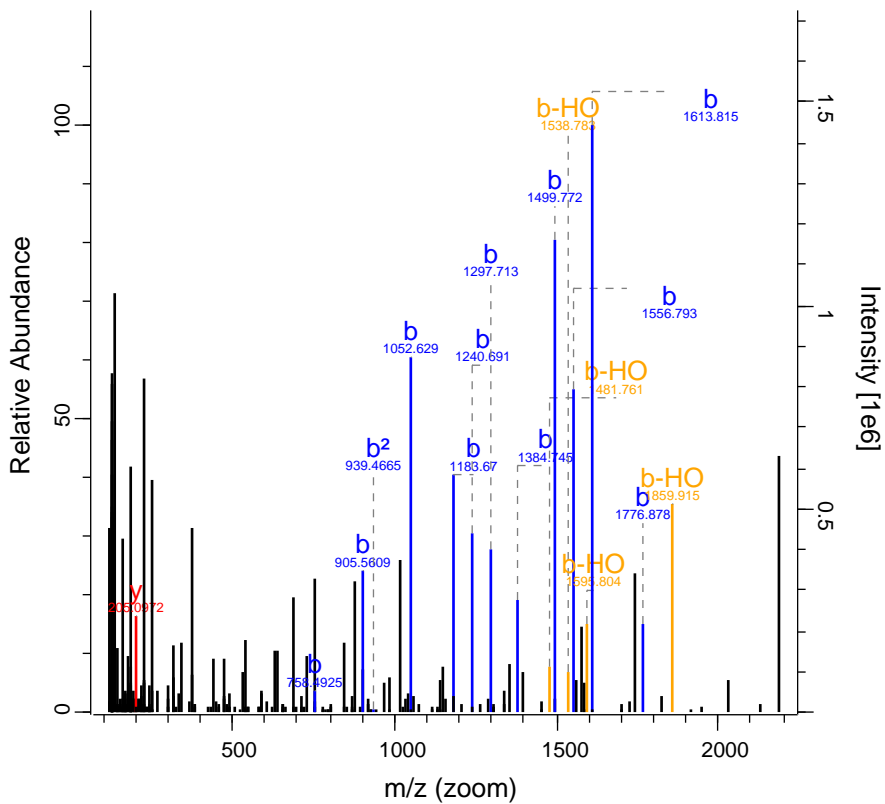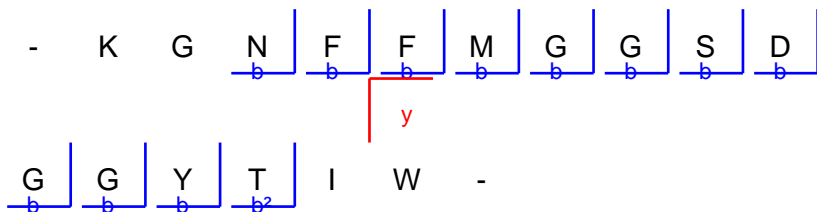

RO-QC-160121\_ZackD\_SS\_Set\_02\_Fractio 39812 FTMS; HC 116.77 630.71 UQCR11

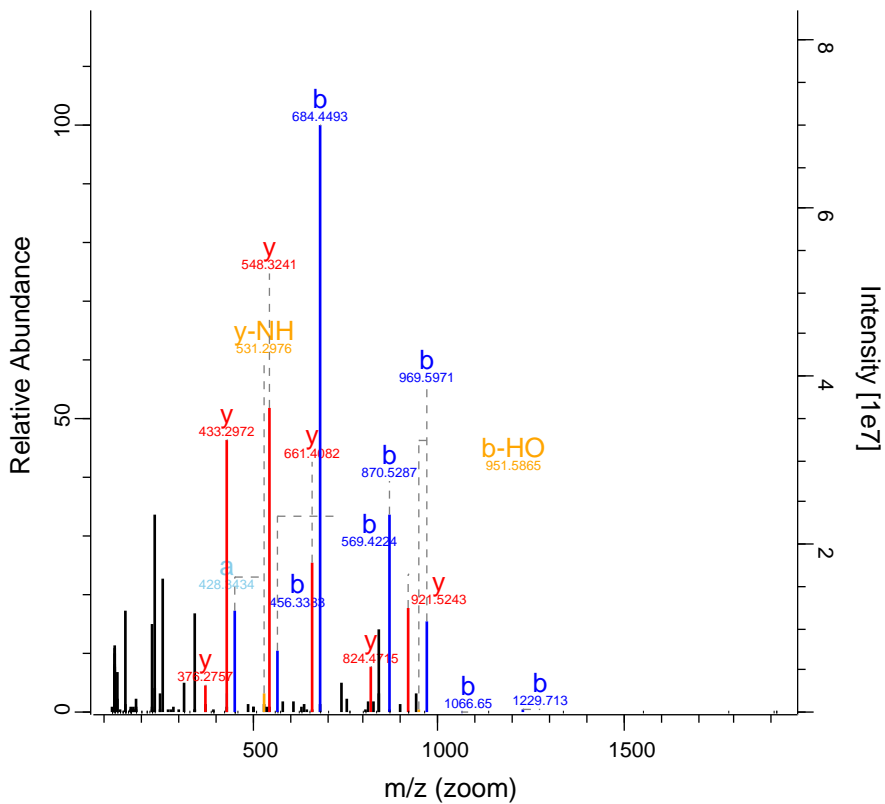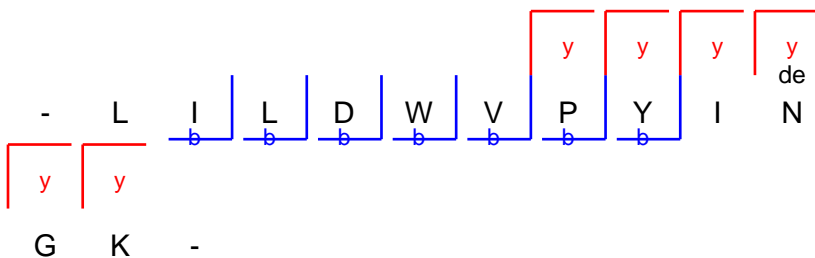

RO-QC-160121\_ZackD\_SS\_Set\_02\_Fractio 39818 FTMS; HC 116.05 946.06 UQCR11

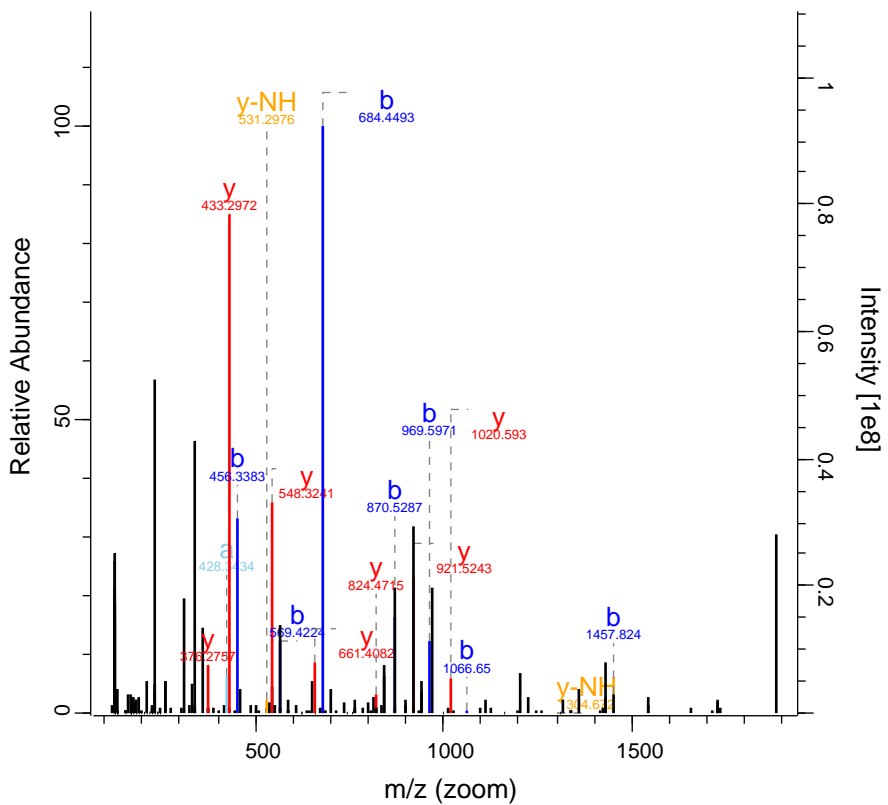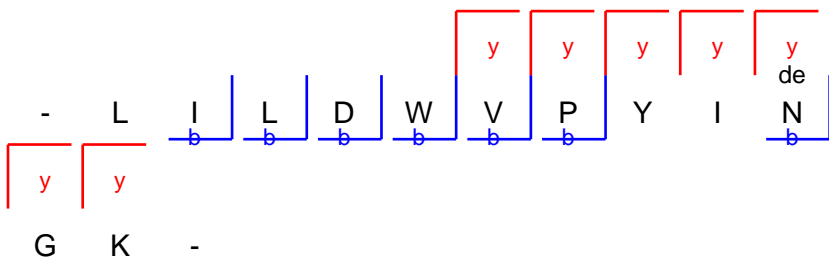

RO-QC-160121\_ZackD\_SS\_Set\_02\_Fraction 40383 FTMS; HC 99.09 846.13 NINJ1

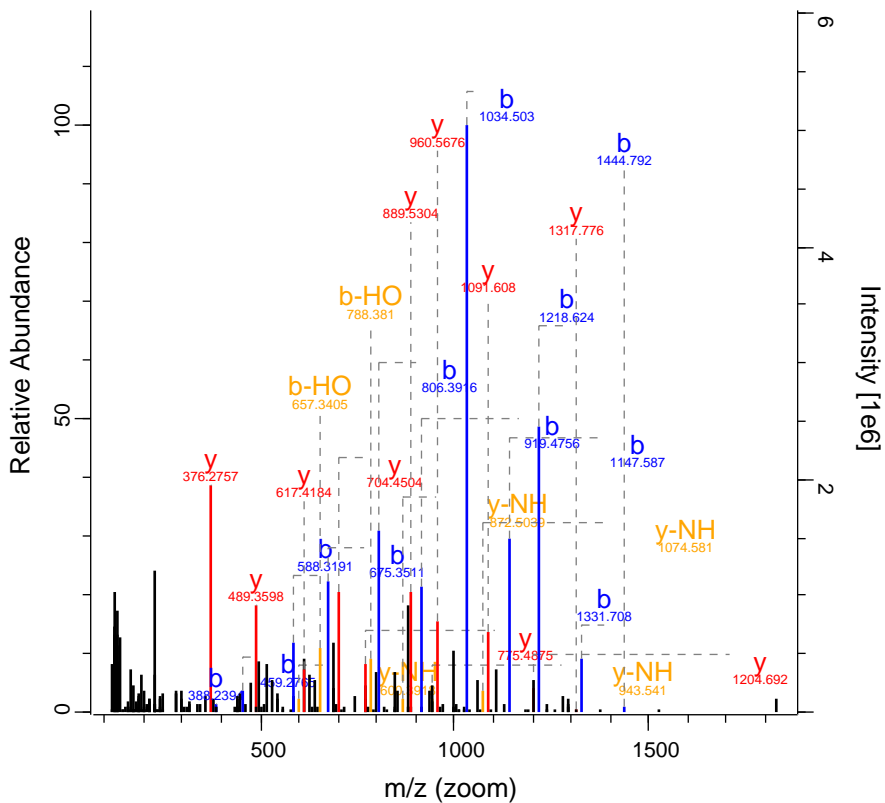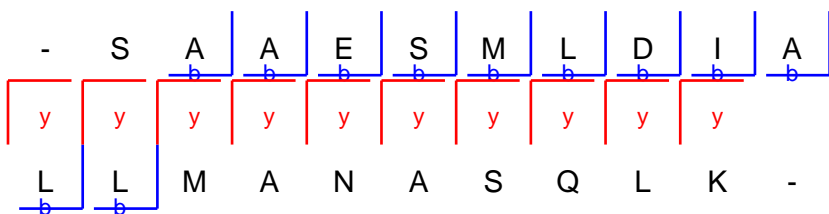

RO-QC-160121\_ZackD\_SS\_Set\_02\_Fraction 40596 FTMS; HC 95.65 679.68 PSENER

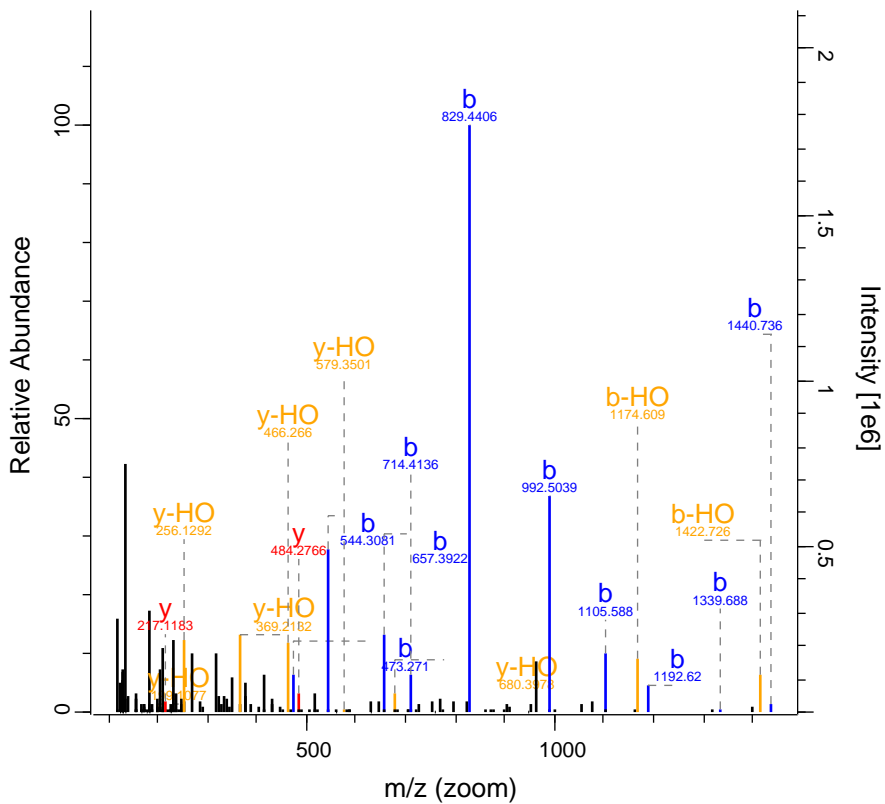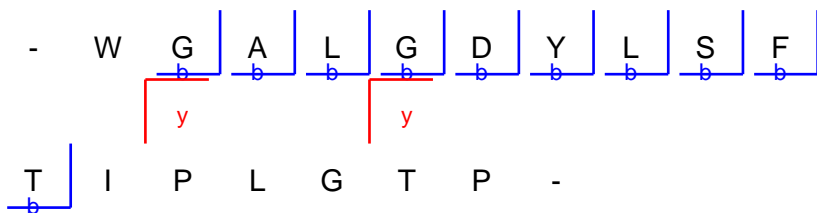

RO-QC-160121\_ZackD\_SS\_Set\_02\_Fraction 40740 FTMS; HCl 108.24 643.9 STRA13

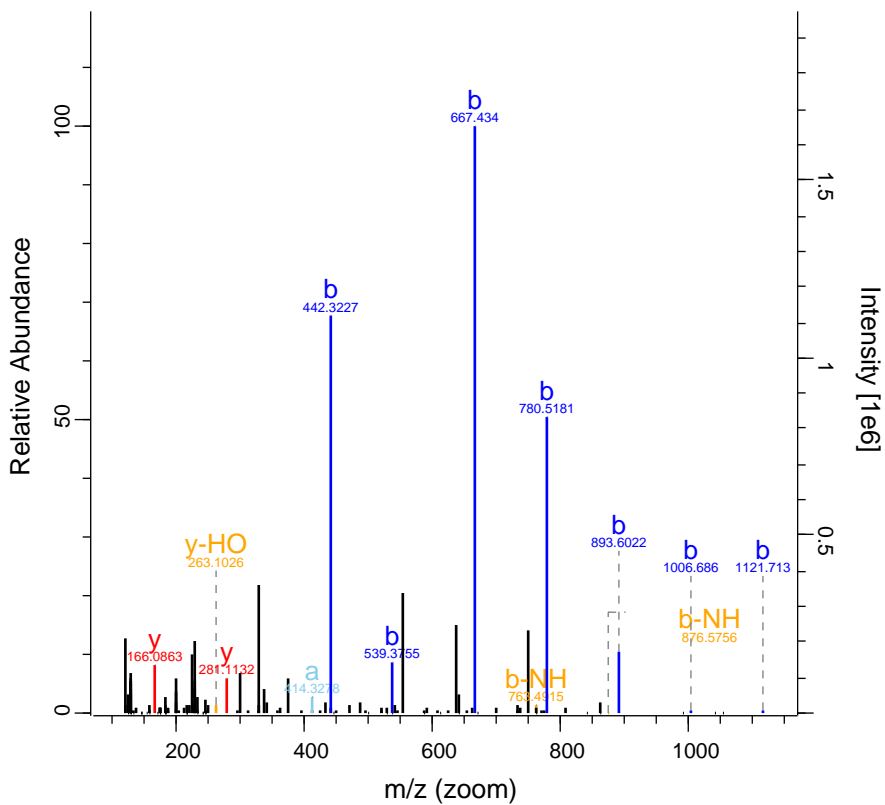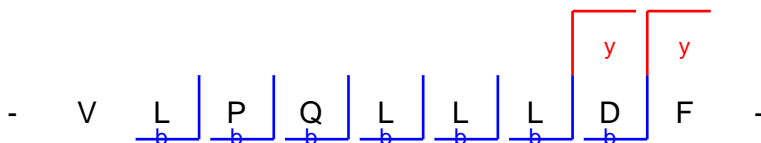



RO-QC-160121\_ZackD\_SS\_Set\_02\_Fraction 5901 FTMS; HC 154.24 752.92 CDK10

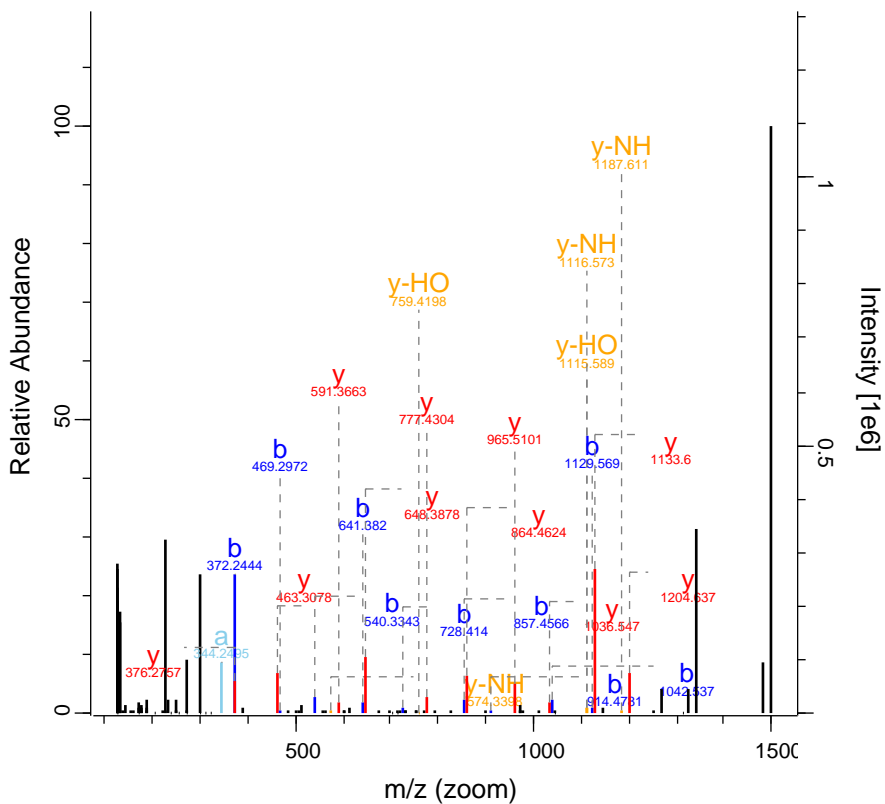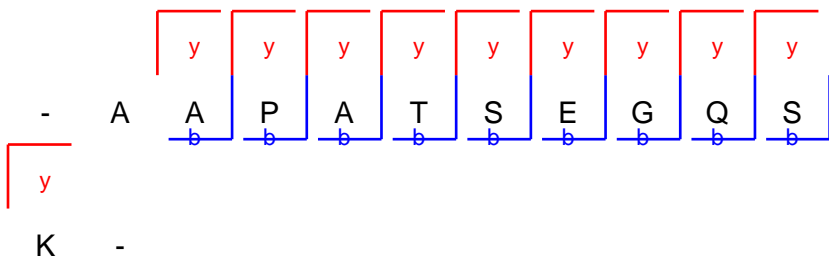

RO-QC-160121\_ZackD\_SS\_Set\_02\_Fraction 5968 FTMS; HCl 35.33 502.28 CDK10

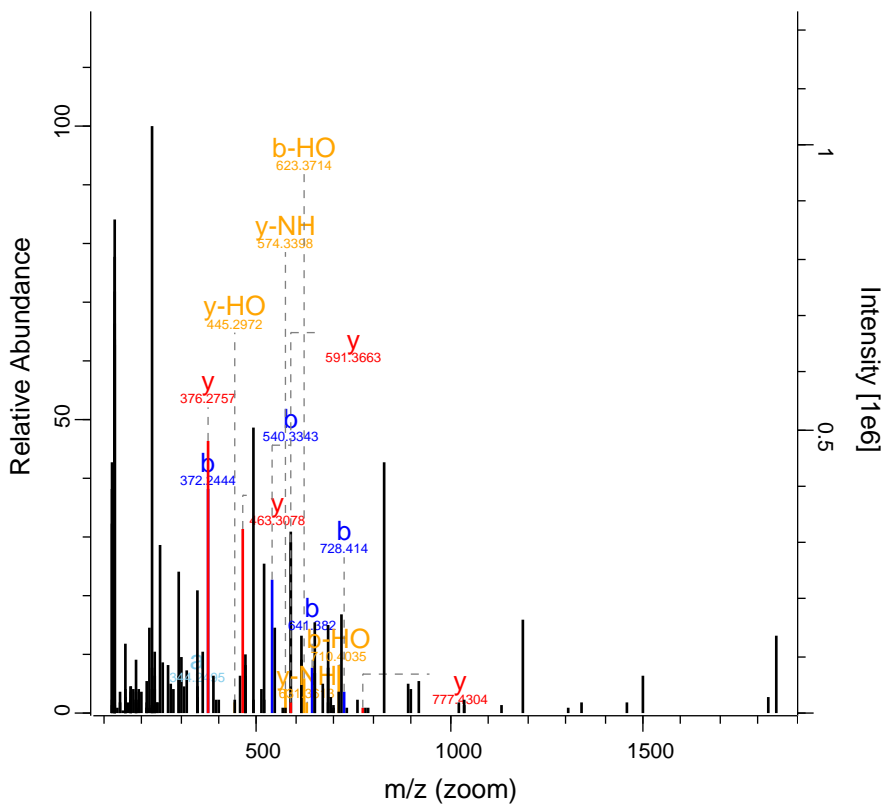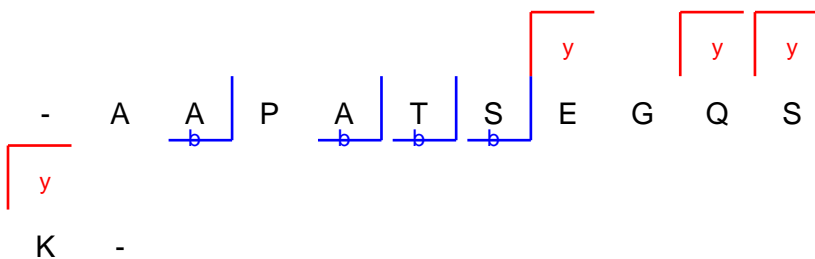

RO-QC-160121\_ZackD\_SS\_Set\_02\_Fraction 6015 FTMS; HC 108.32 579.64 TATDN2

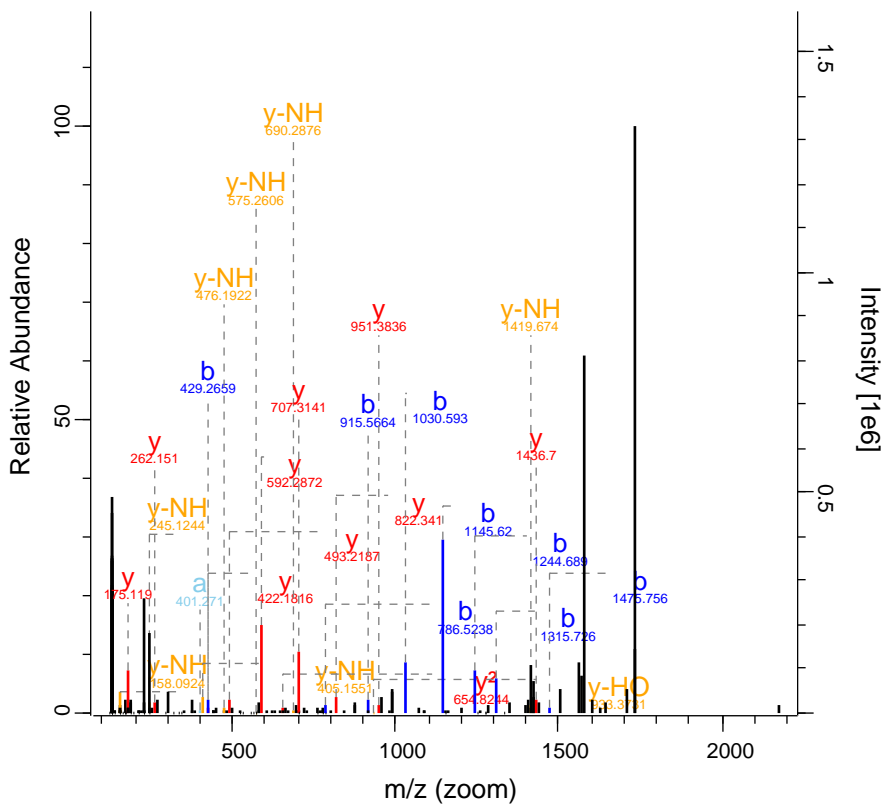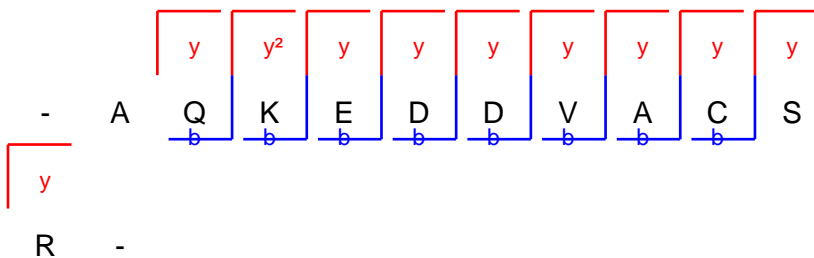

RO-QC-160121\_ZackD\_SS\_Set\_02\_Fraction 6055 FTMS; HCl 53.17 645.86 ZNF706

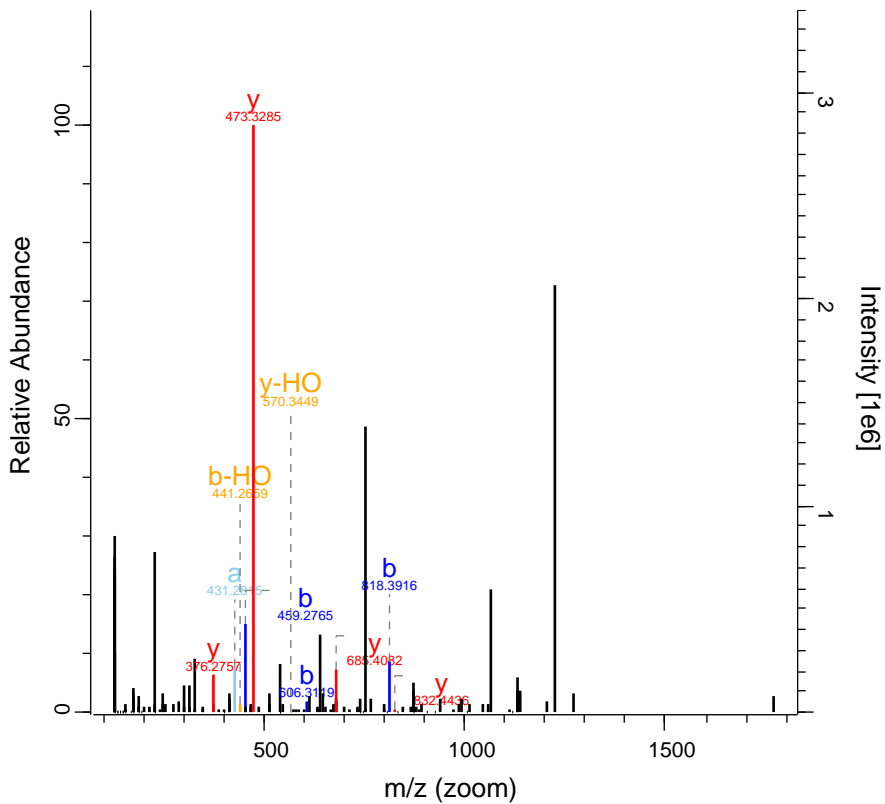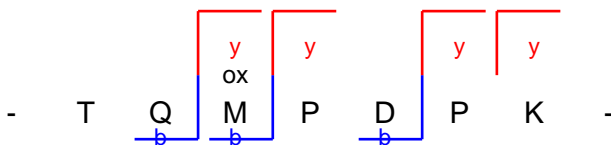

RO-QC-160121\_ZackD\_SS\_Set\_02\_Fraction 6182 FTMS; HCl 88.95 664.88 IMUP

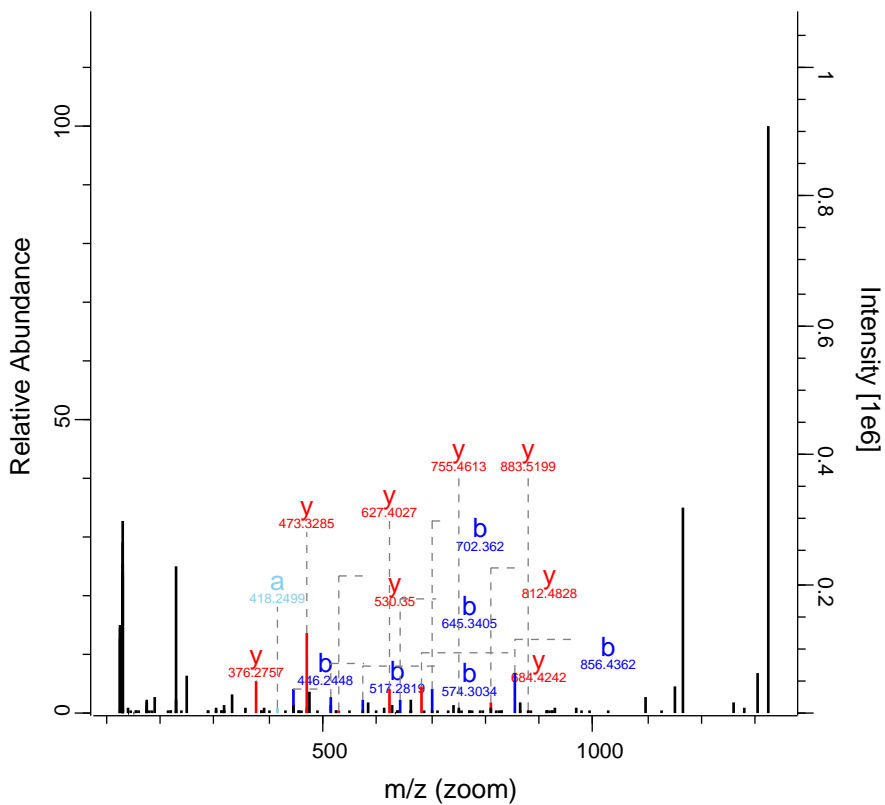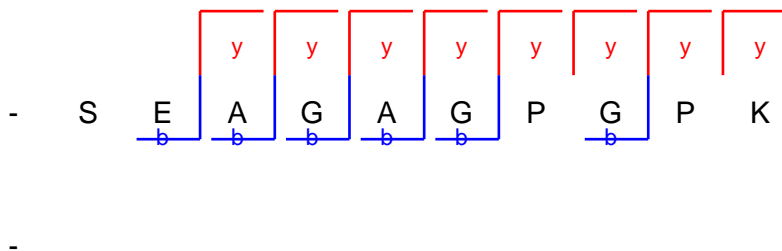

RO-QC-160121\_ZackD\_SS\_Set\_02\_Fraction 6256 FTMS; HCl 78.69 861.42 SECISBP2

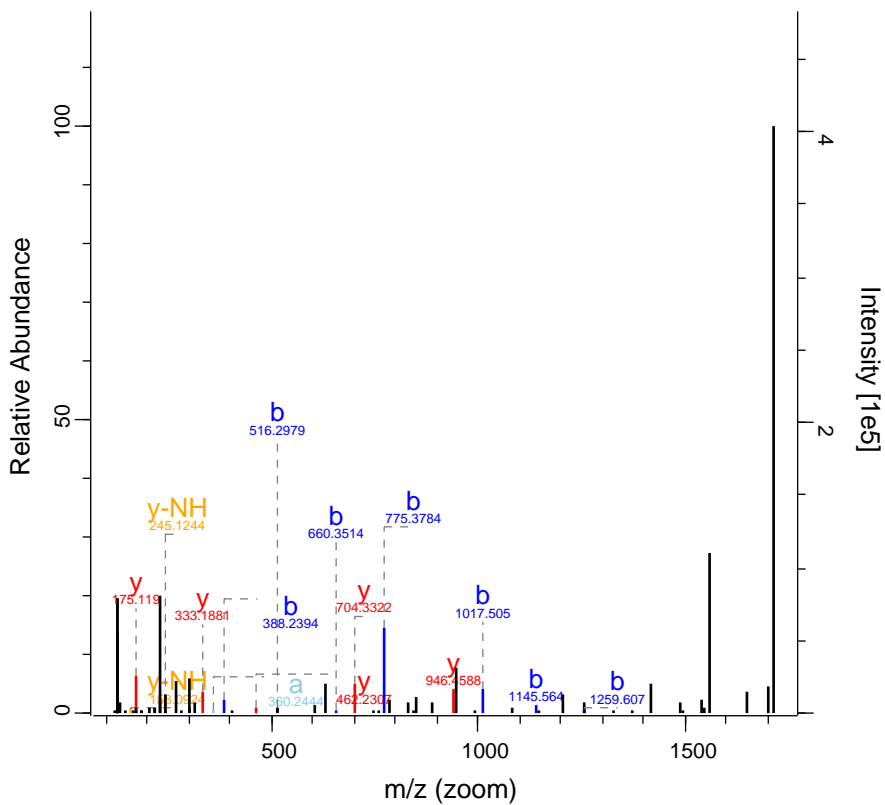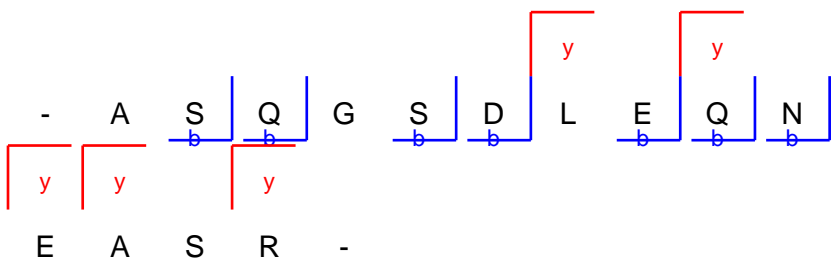



RO-QC-160121\_ZackD\_SS\_Set\_02\_Fraction 6407 FTMS; HCl 52.34 598.34 USP31

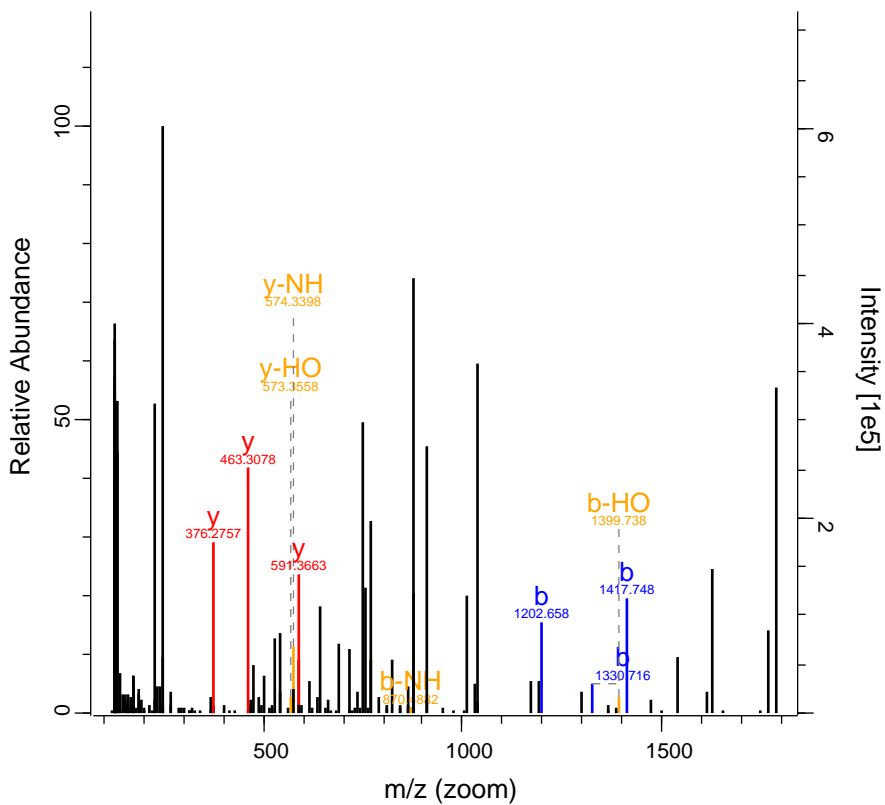



RO-QC-160121\_ZackD\_SS\_Set\_02\_Fraction 6684 FTMS; HC 117.98 549.28 MACROD2

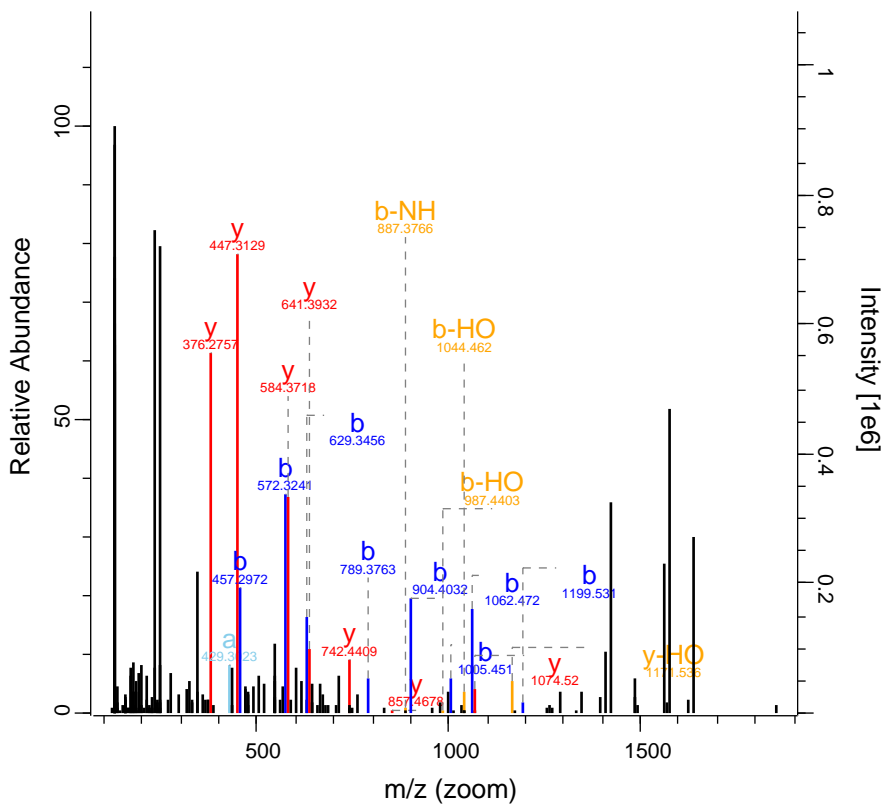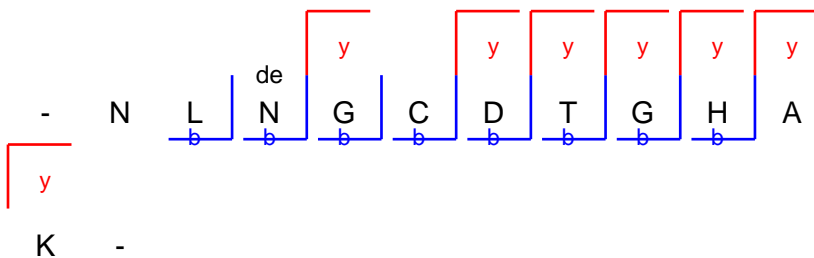

RO-QC-160121\_ZackD\_SS\_Set\_02\_Fraction 7021 FTMS; HC 128.61 721.86 TMEFF1

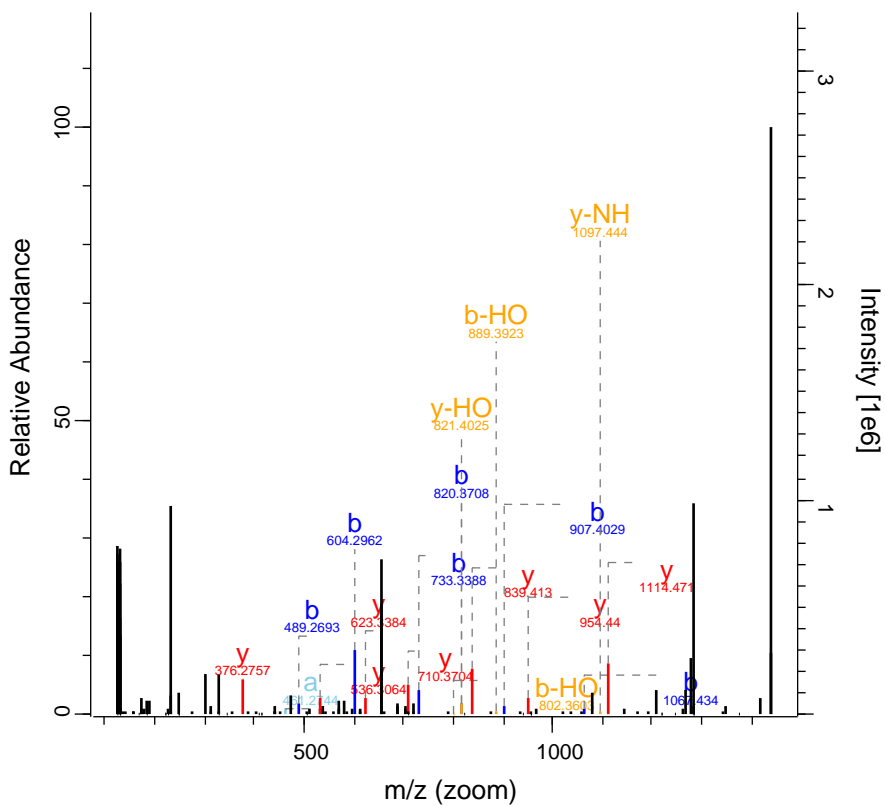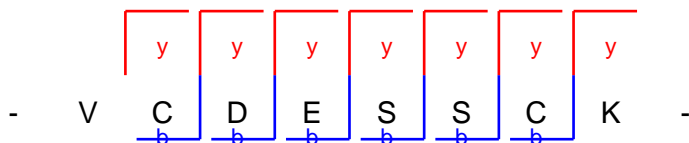

RO-QC-160121\_ZackD\_SS\_Set\_02\_Fraction\_8

7221 FTMS; HCD 58.51 400.73

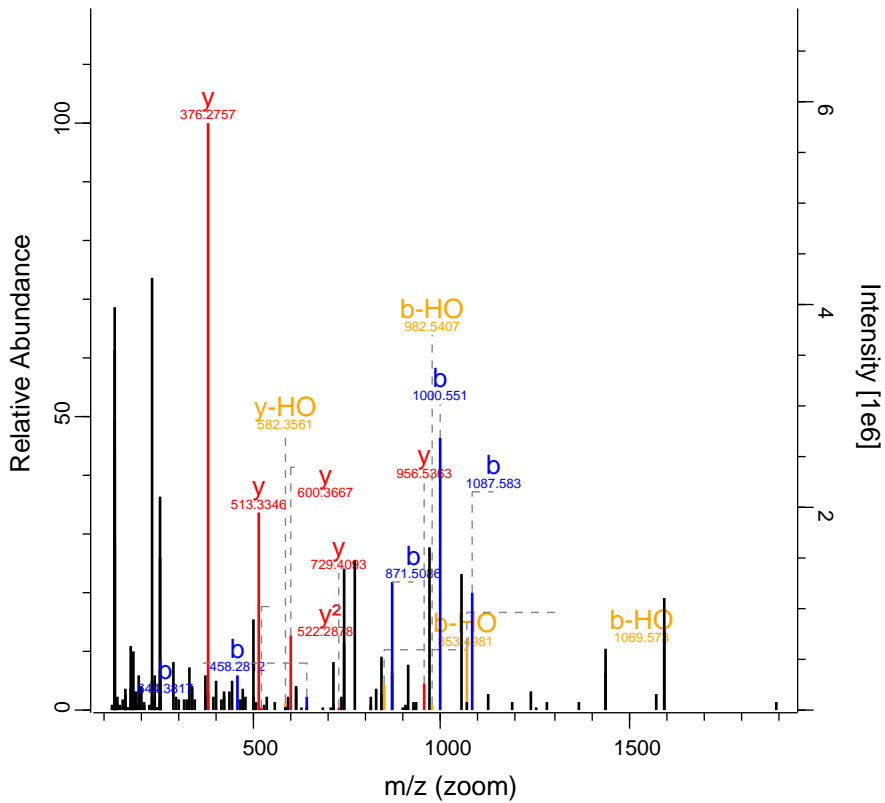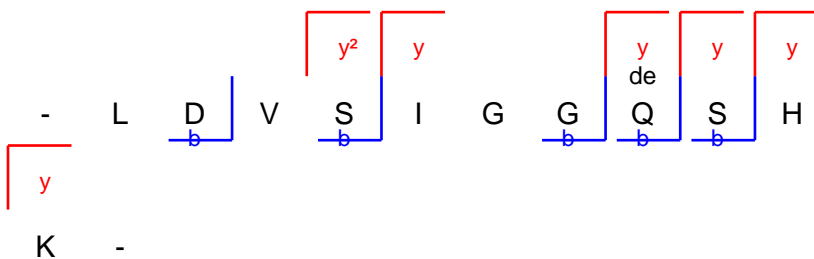

K -

RO-QC-160121\_ZackD\_SS\_Set\_02\_Fraction 7517 FTMS; HCl 42.74 562.68 GLOD5

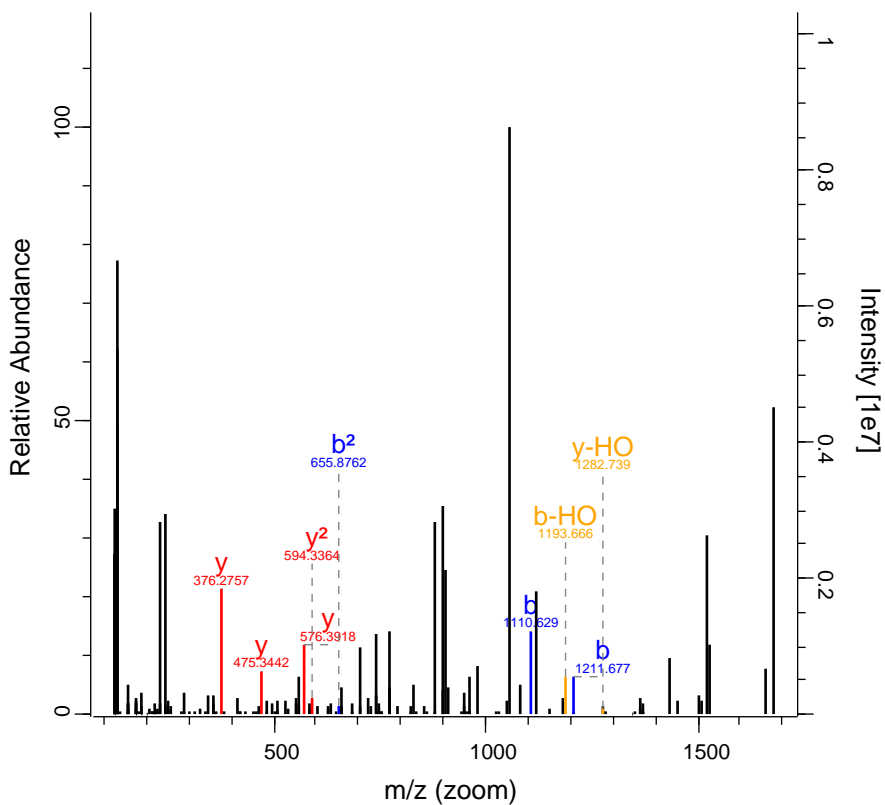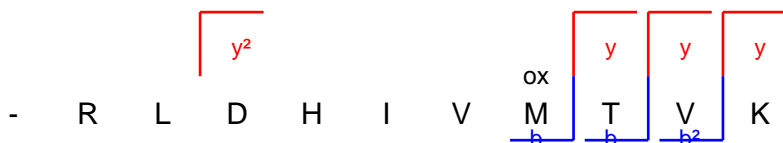

RO-QC-160121\_ZackD\_SS\_Set\_02\_Fraction 7552 FTMS; HCl 65.06 843.51 GLOD5

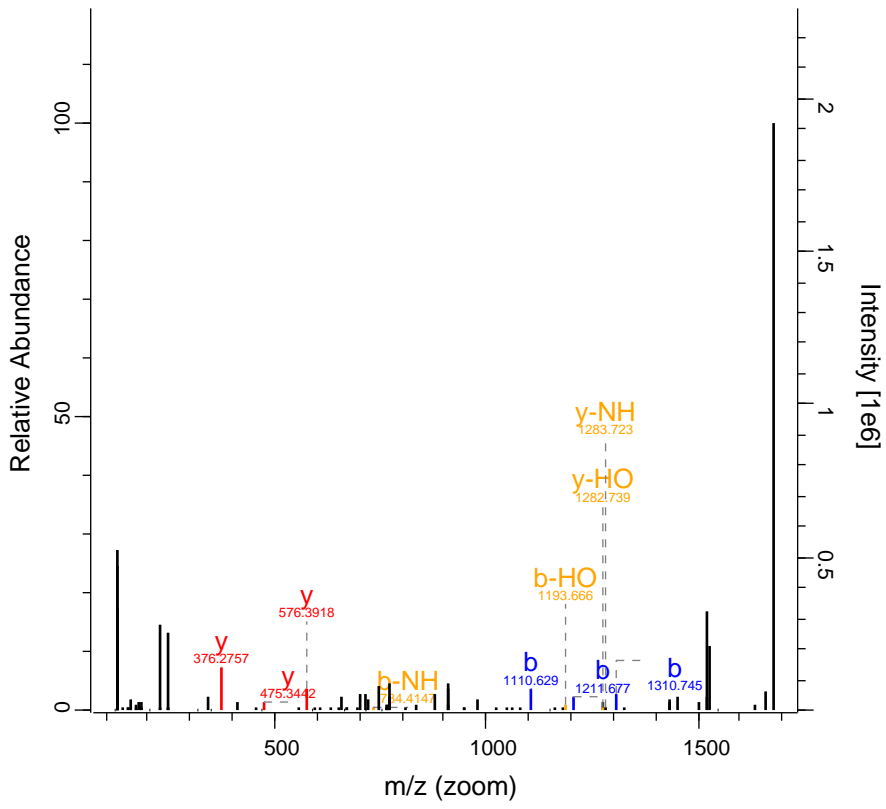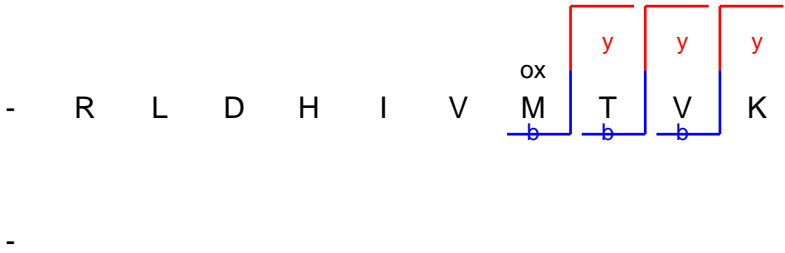

RO-QC-160121\_ZackD\_SS\_Set\_02\_Fraction 9088 FTMS; HCl 93.55 440.77 ZNF66

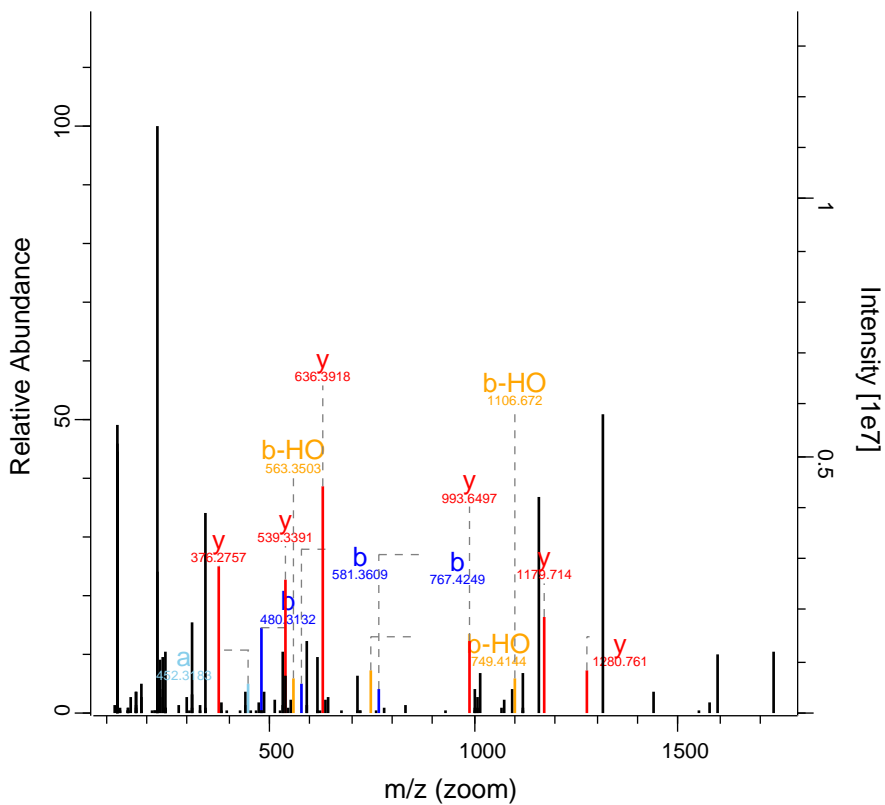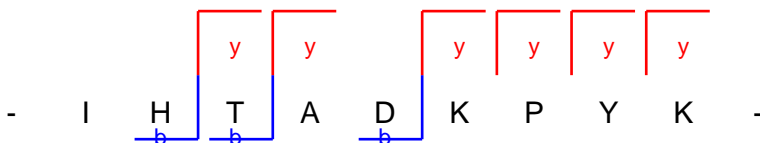

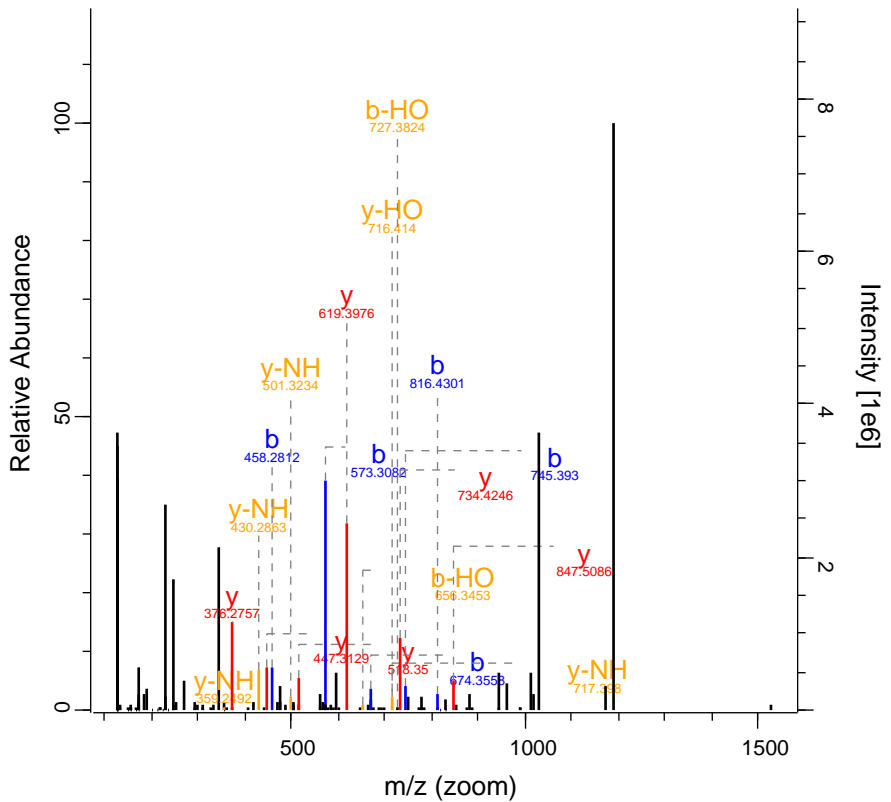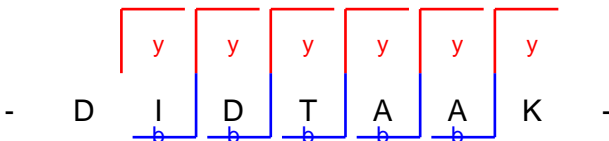

RO-QC-160121\_ZackD\_SS\_Set\_02\_Fraction 9469 FTMS; HCl 158.04 779.9 SLC39A1

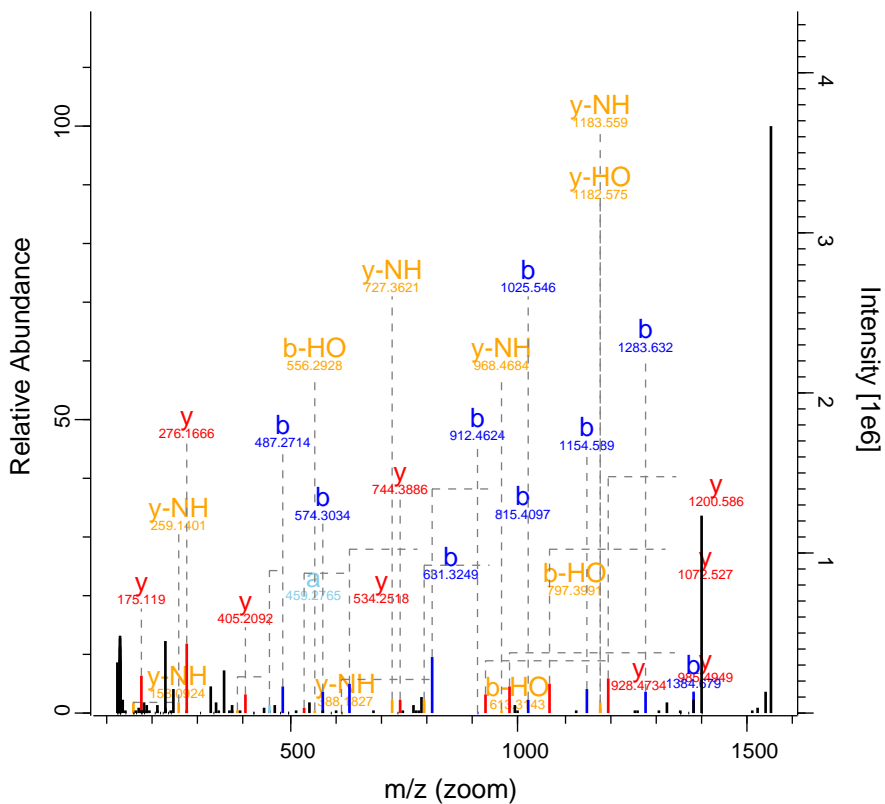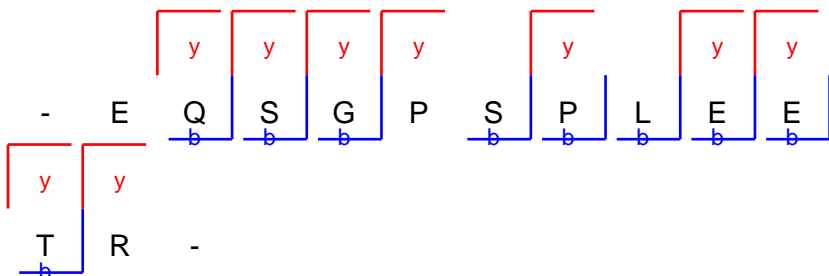



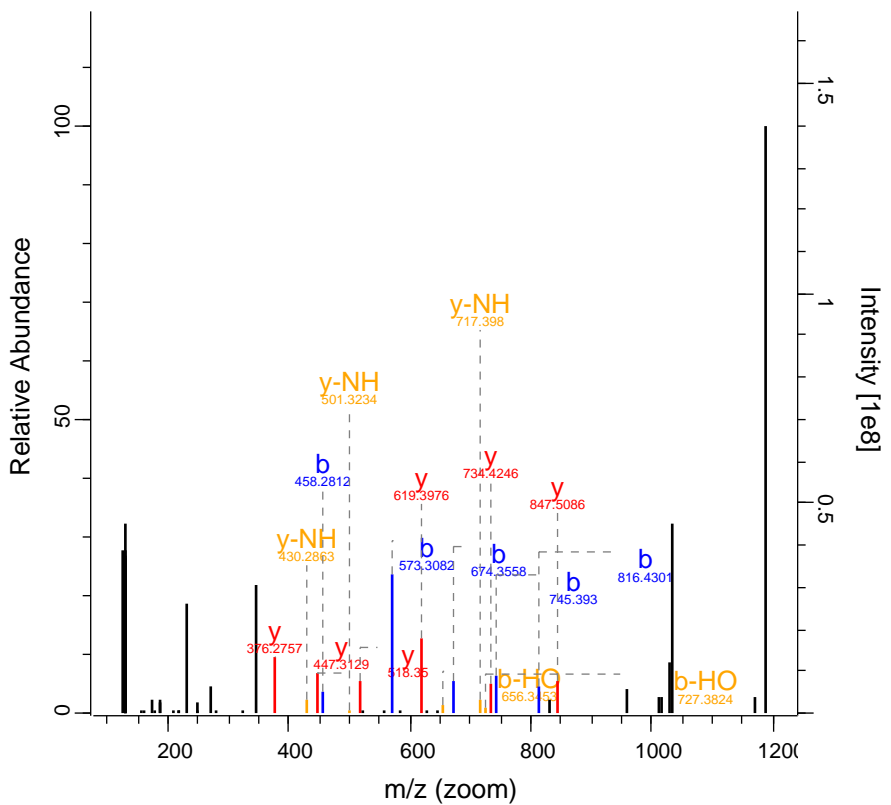



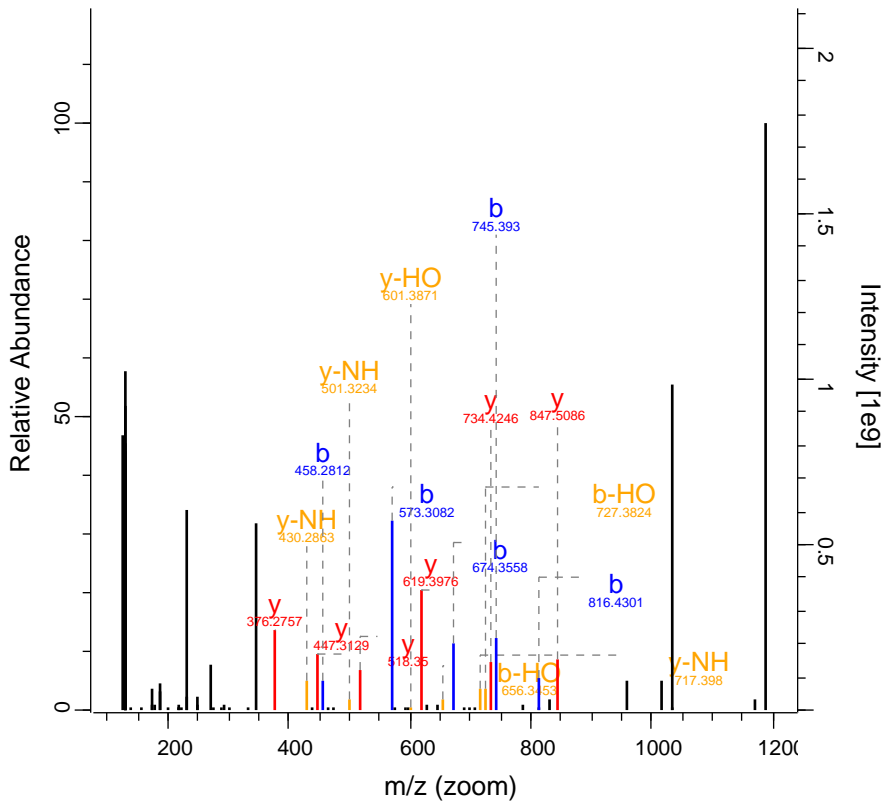

RO-QC-160121\_ZackD\_SS\_Set\_02\_Fra 10041 FTMS; HC 97.47 397.9 ATP5G1;ATP5G2;ATP5G3

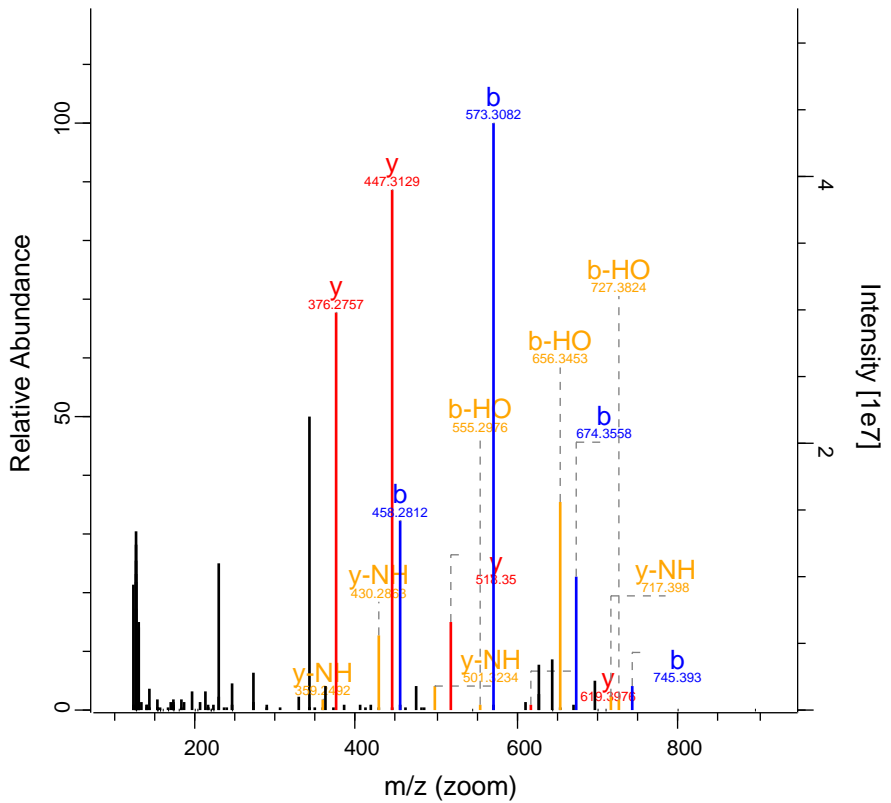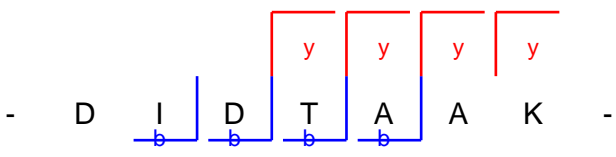

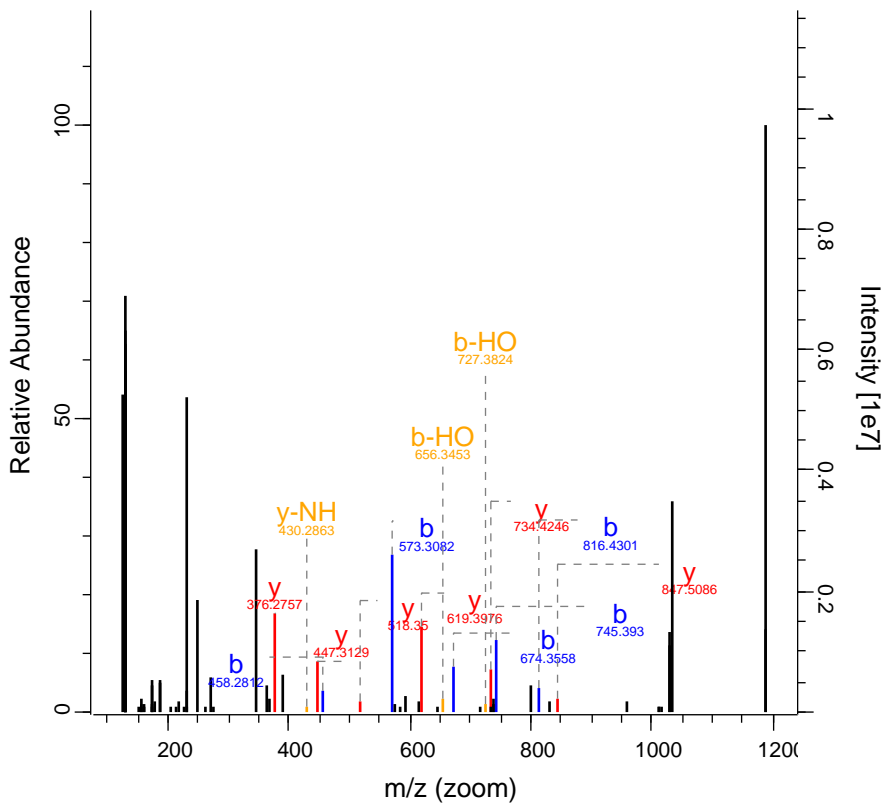

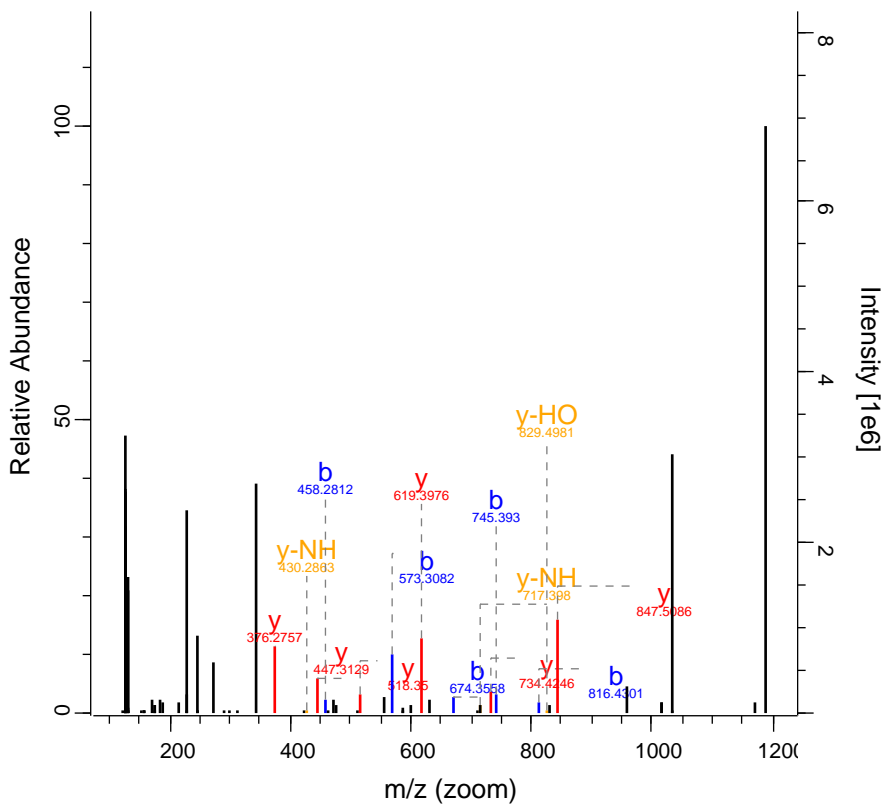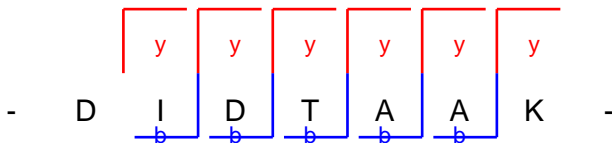



RO-QC-160121\_ZackD\_SS\_Set\_02\_Fraccio 12724 FTMS; HC 127.02 718.89 SERF2

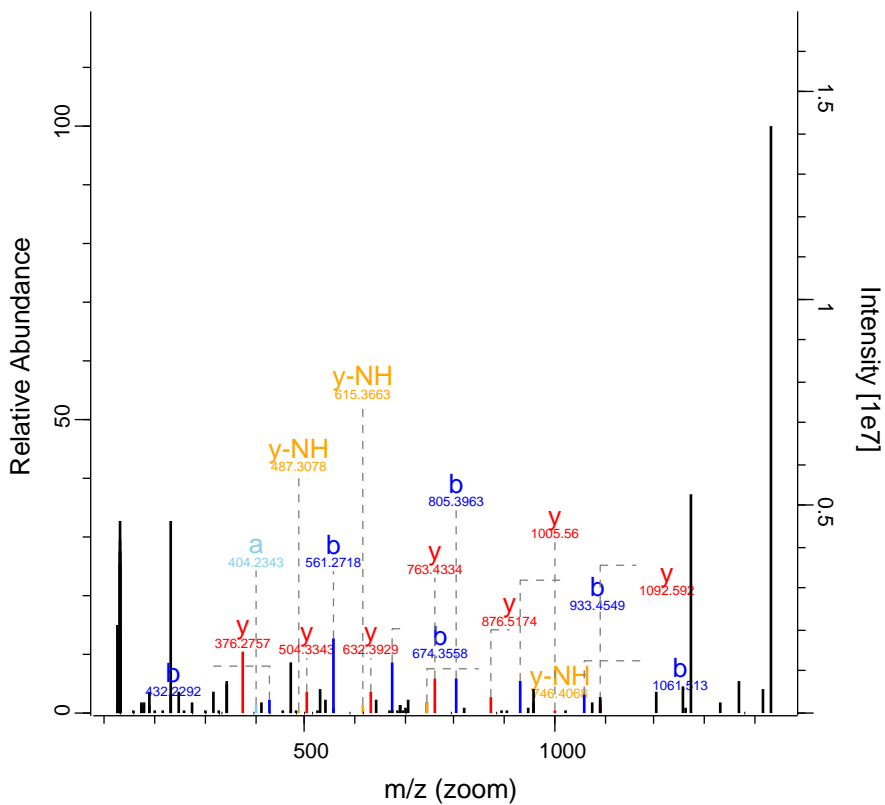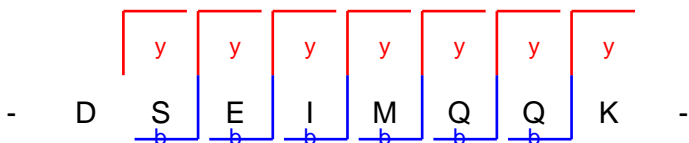



RO-QC-160121\_ZackD\_SS\_Set\_02\_Fraction 13265 FTMS; HC 51.77 493.51 GABRE

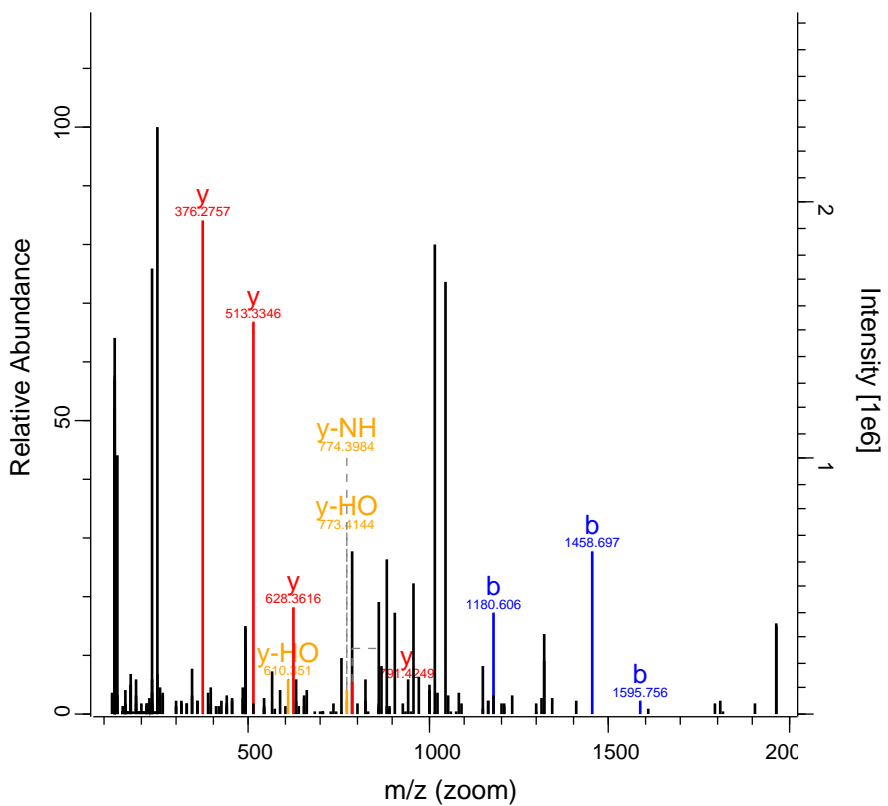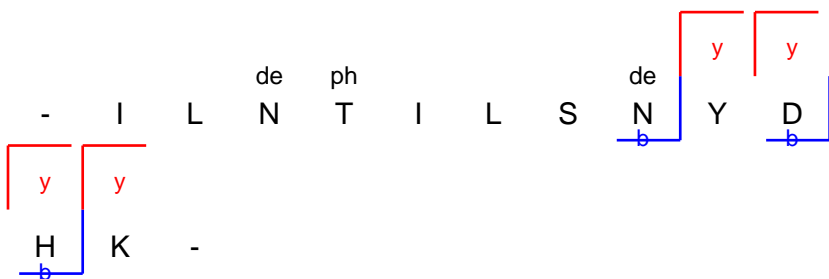



RO-QC-160121\_ZackD\_SS\_Set\_02\_Fraction 13391 FTMS; HC 83.78 767.93 ZNF251

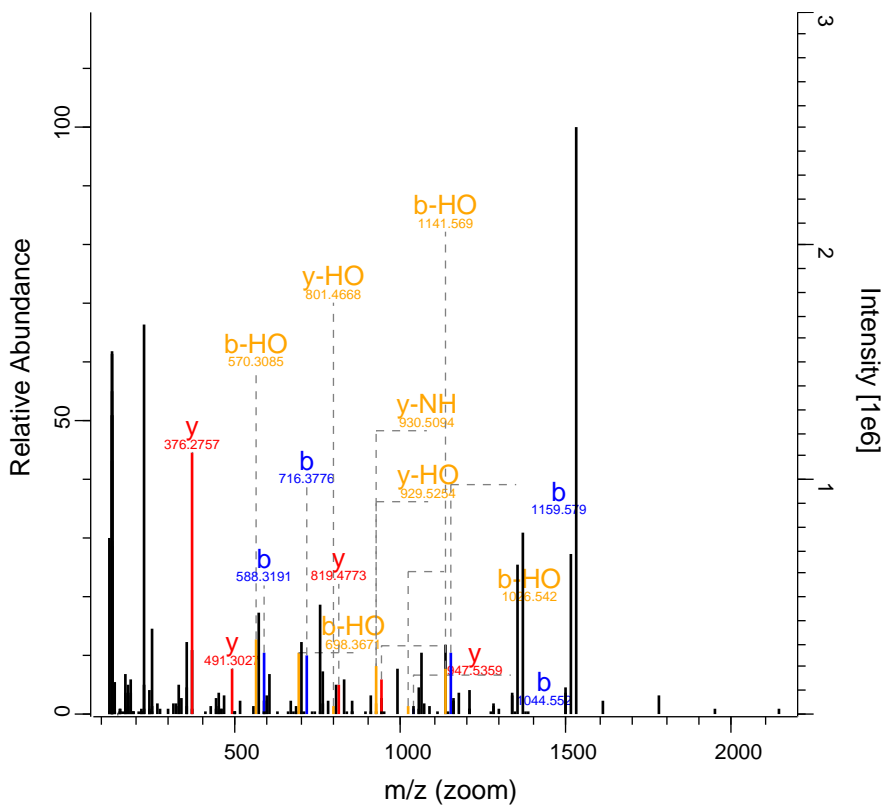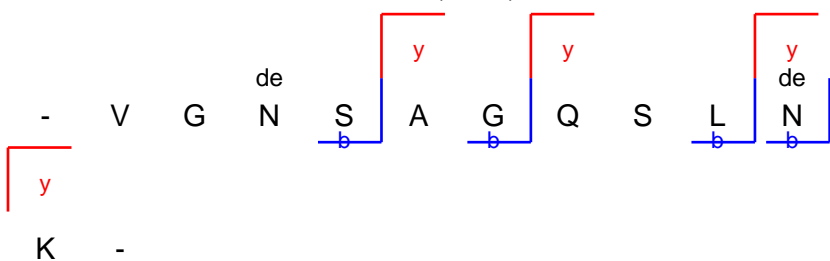

K -

RO-QC-160121\_ZackD\_SS\_Set\_02\_Fraction 14136 FTMS; HC 47.26 976.58 NEGR1

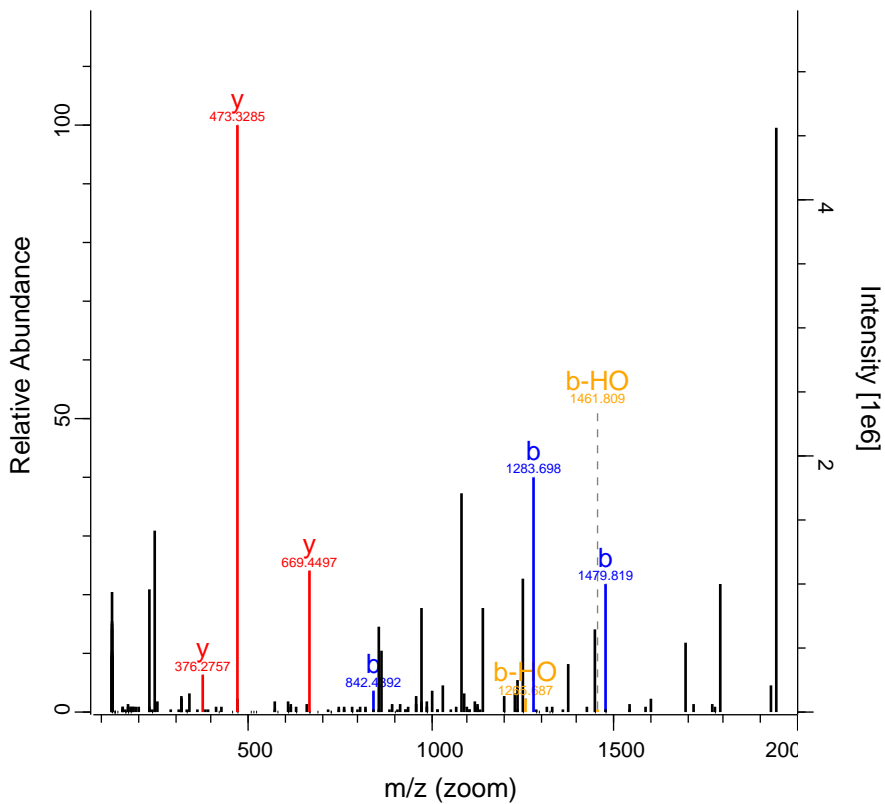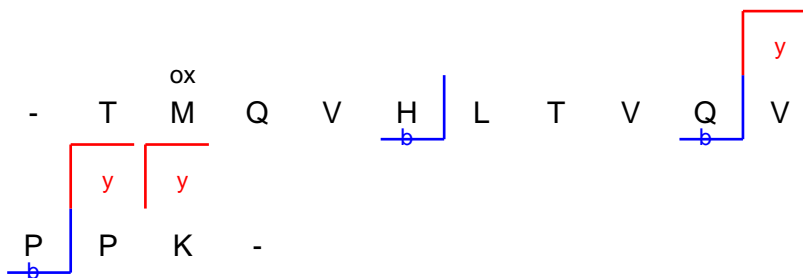

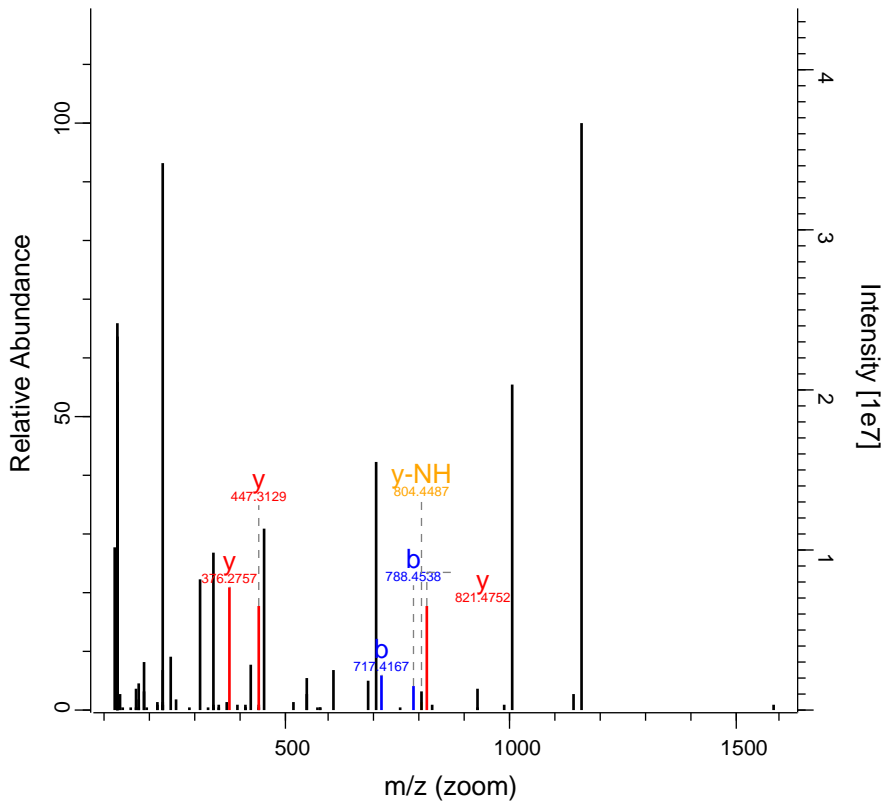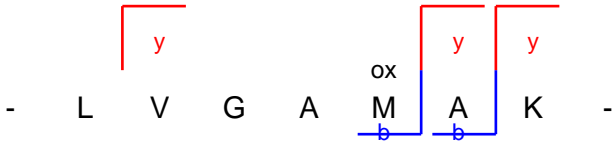

RO-QC-160121\_ZackD\_SS\_Set\_02\_Fraction 15058 FTMS; HC 47.26 977.08 NEGR1

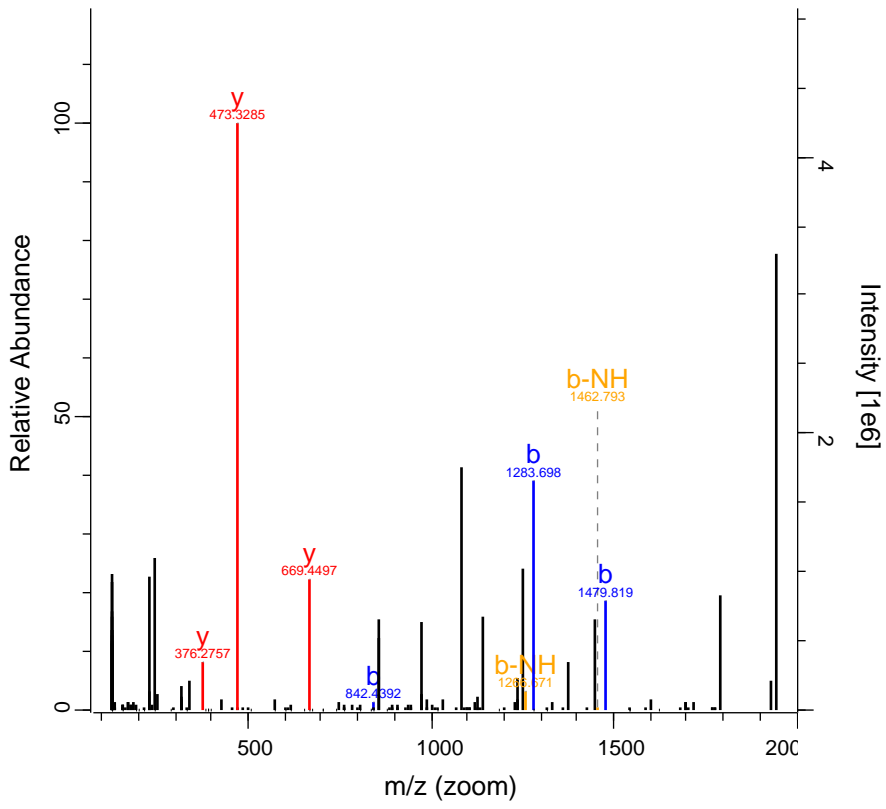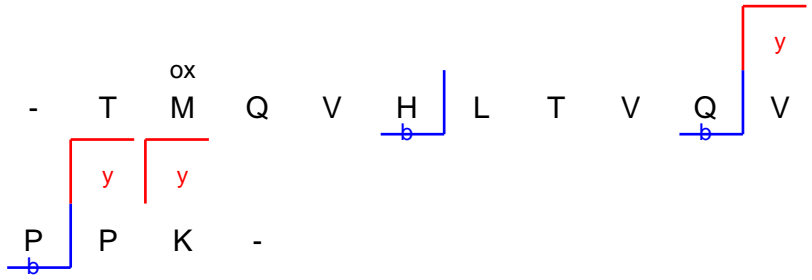

RO-QC-160121\_ZackD\_SS\_Set\_02\_Fraction 15119 FTMS; HC 53.57 676.07 ZNF425

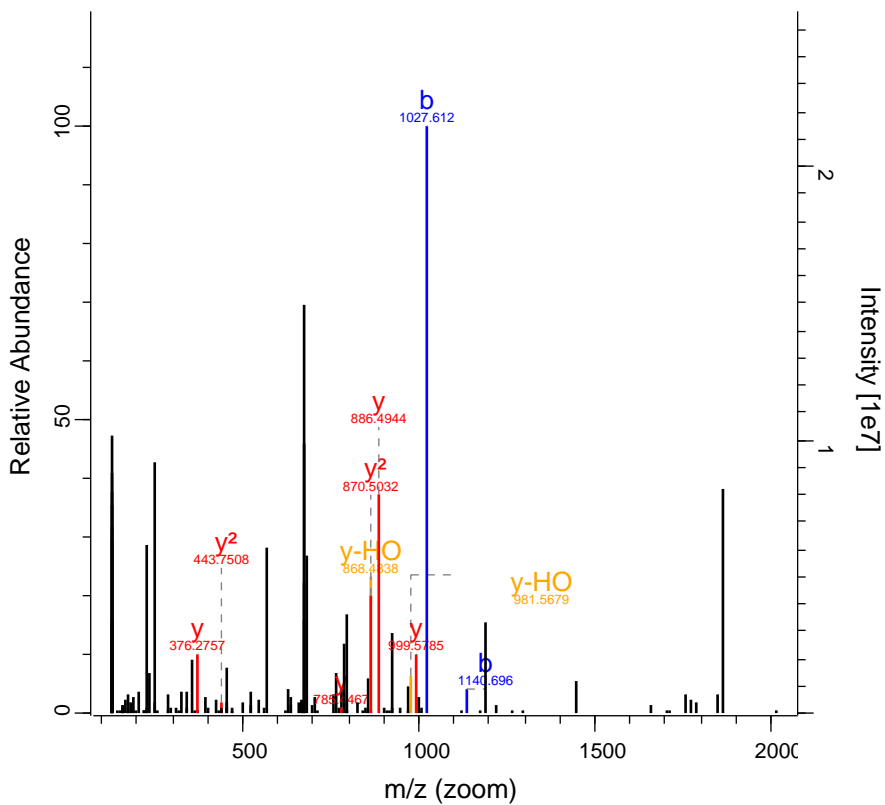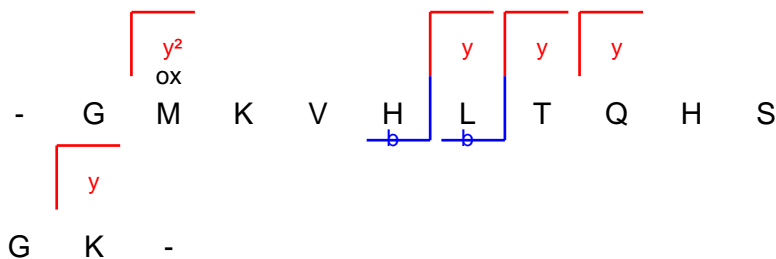

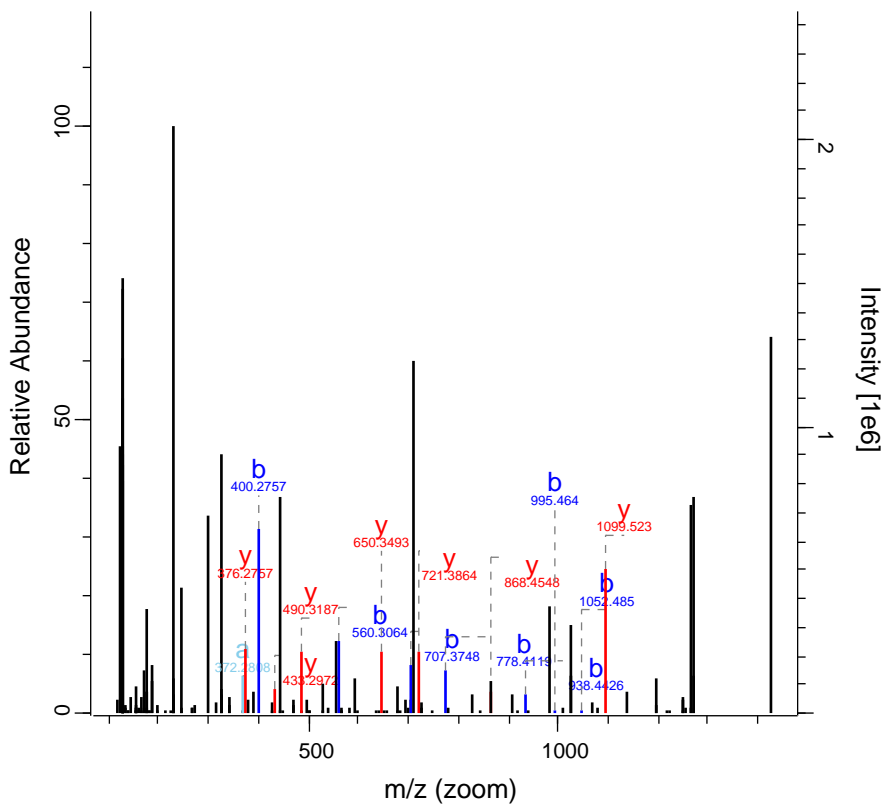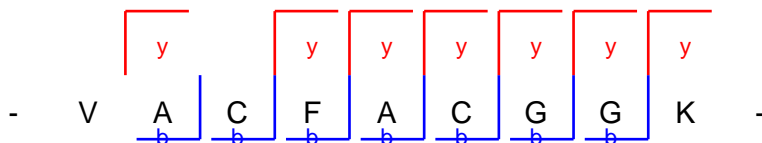



RO-QC-160121\_ZackD\_SS\_Set\_02\_Fraction 19096 FTMS; HCl 53.28 723.6 SVEP1

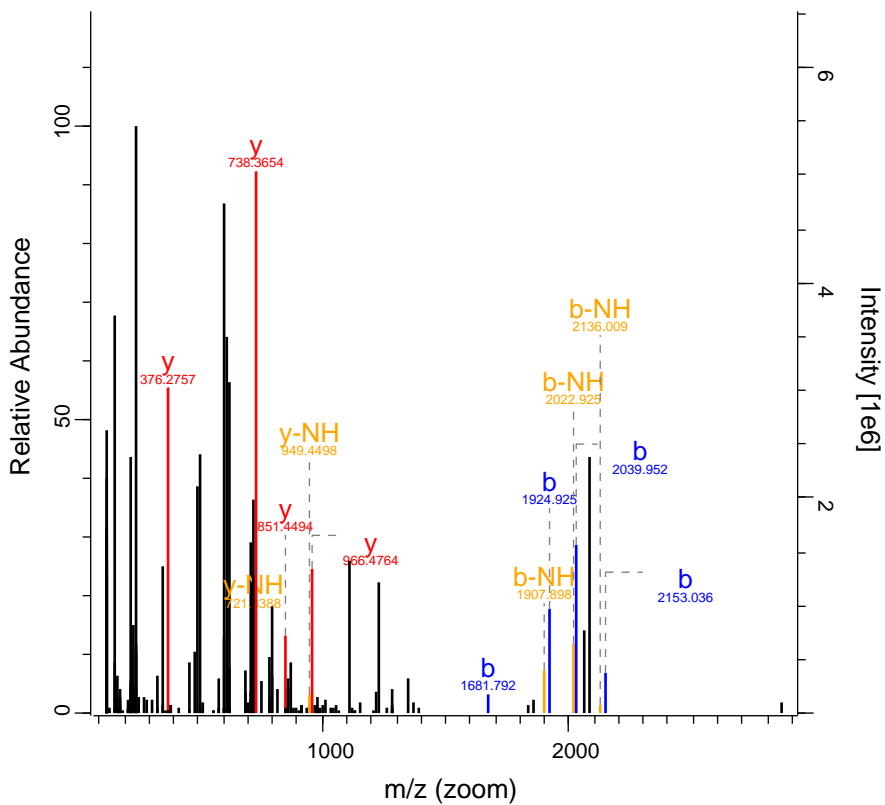

- L C P S G M Y T E Y

I H S R N I S D C K -

b

y

de

y

y

y





RO-QC-160121\_ZackD\_SS\_Set\_02\_Fraction 22312 FTMS; HC 49.12 739.08 RIMS1

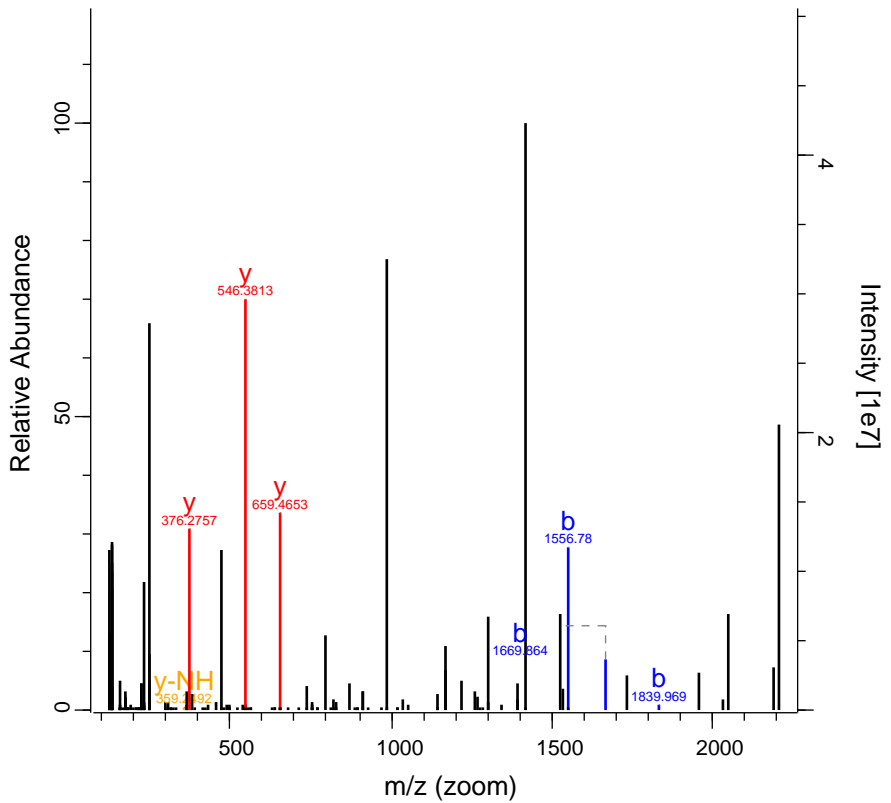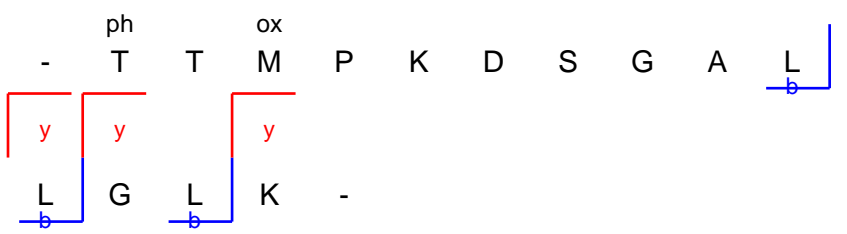



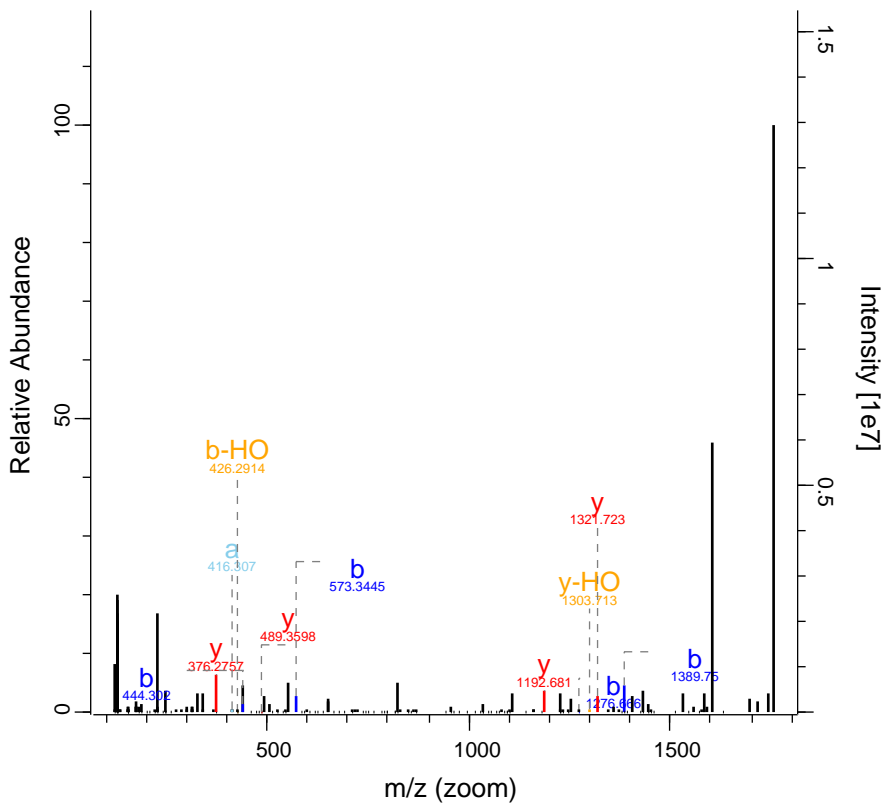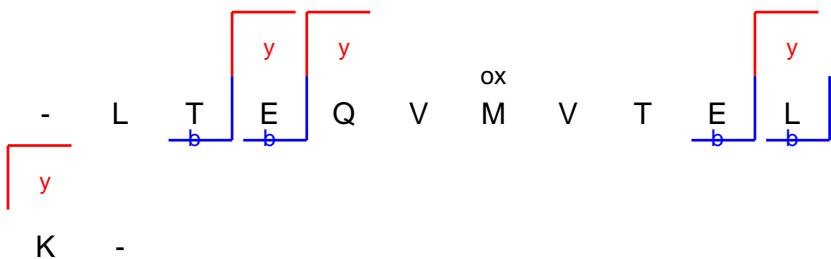

K -



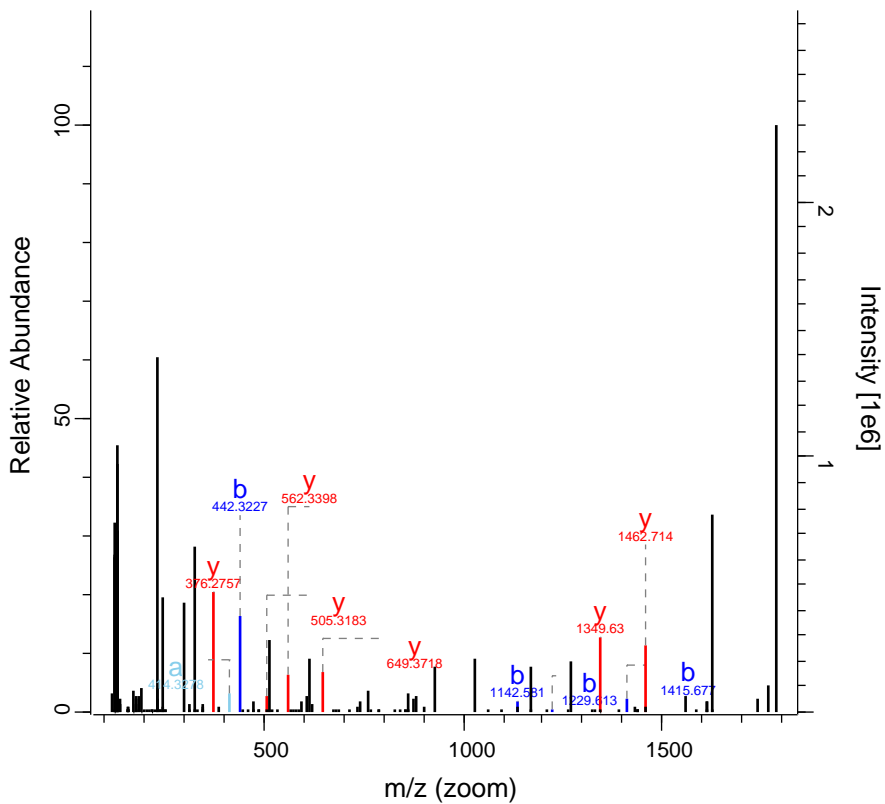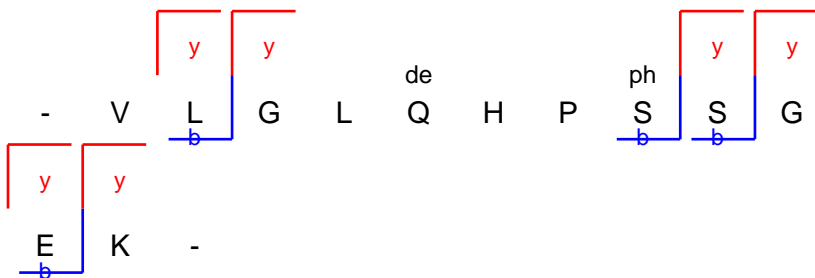



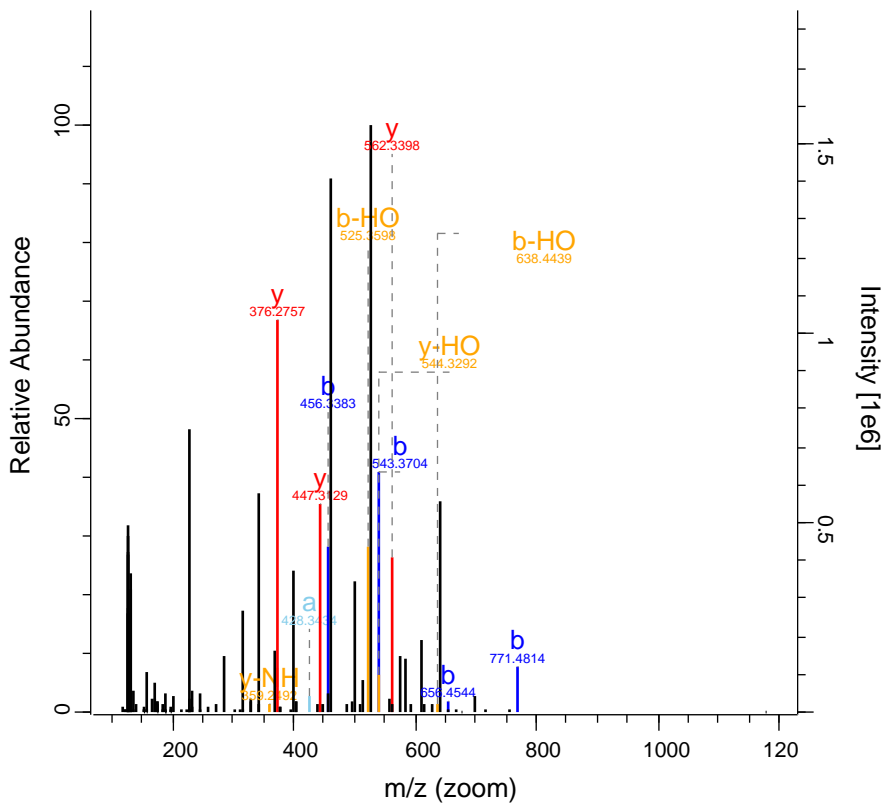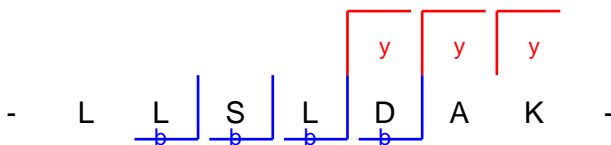



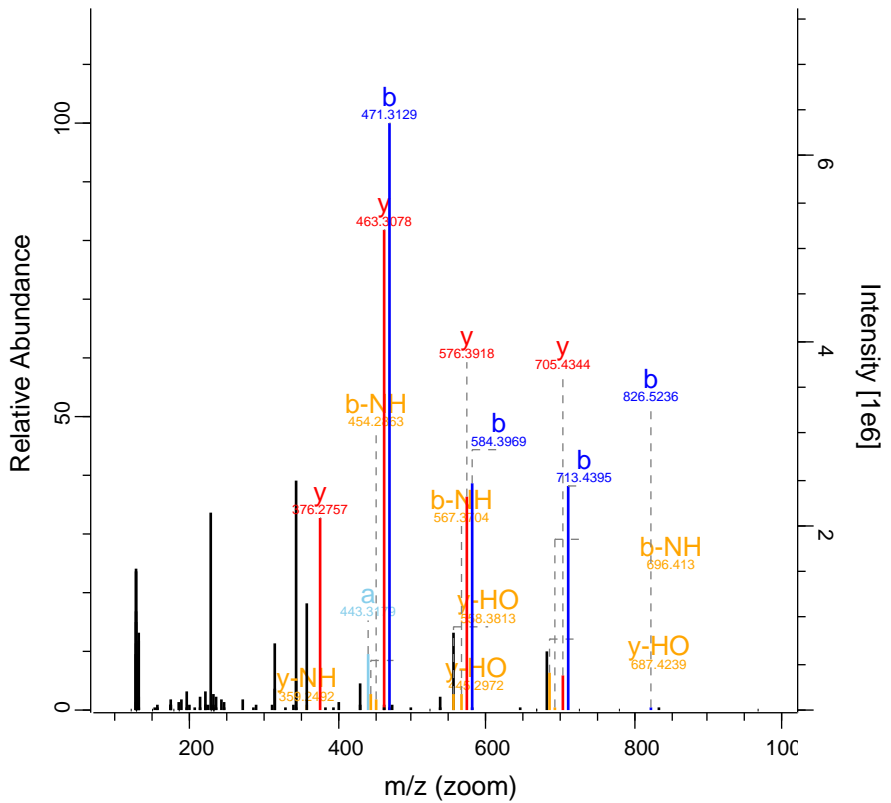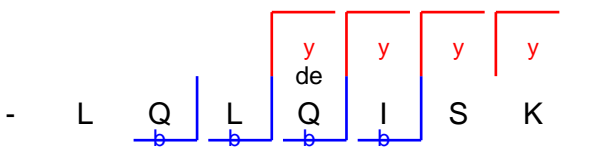



RO-QC-160121\_ZackD\_SS\_Set\_02\_Fraction 28125 FTMS; HCl 46.75 870.8 CCDC168

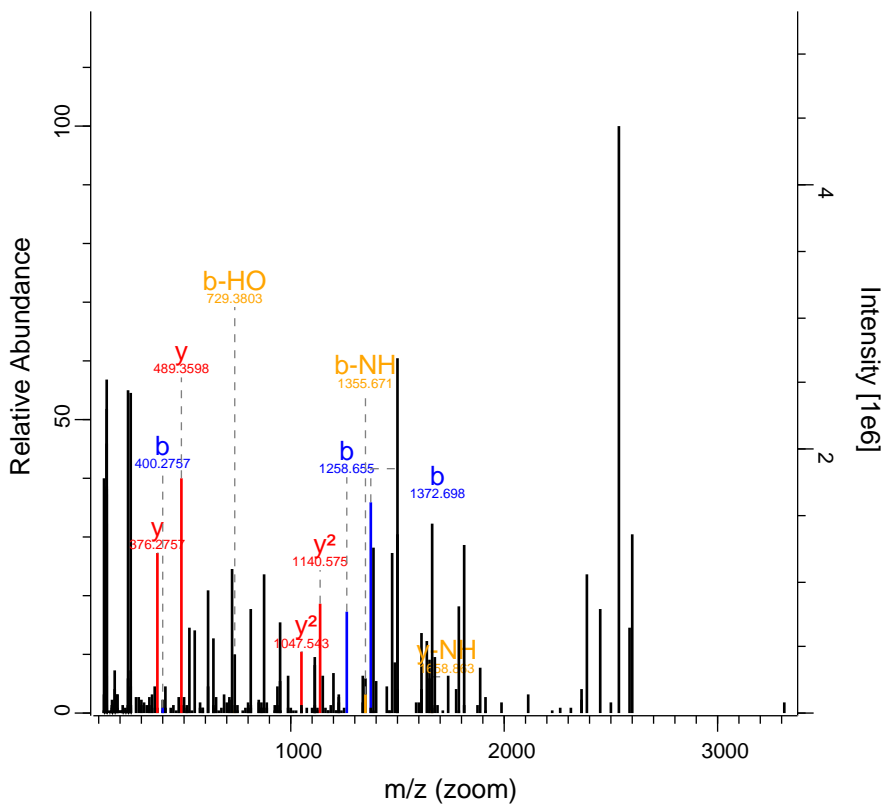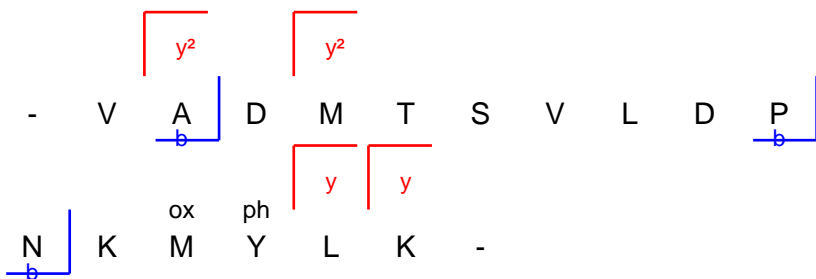

RO-QC-160121\_ZackD\_SS\_Set\_02\_Fractio 28227 FTMS; HC 145.28 904.01 UGCG

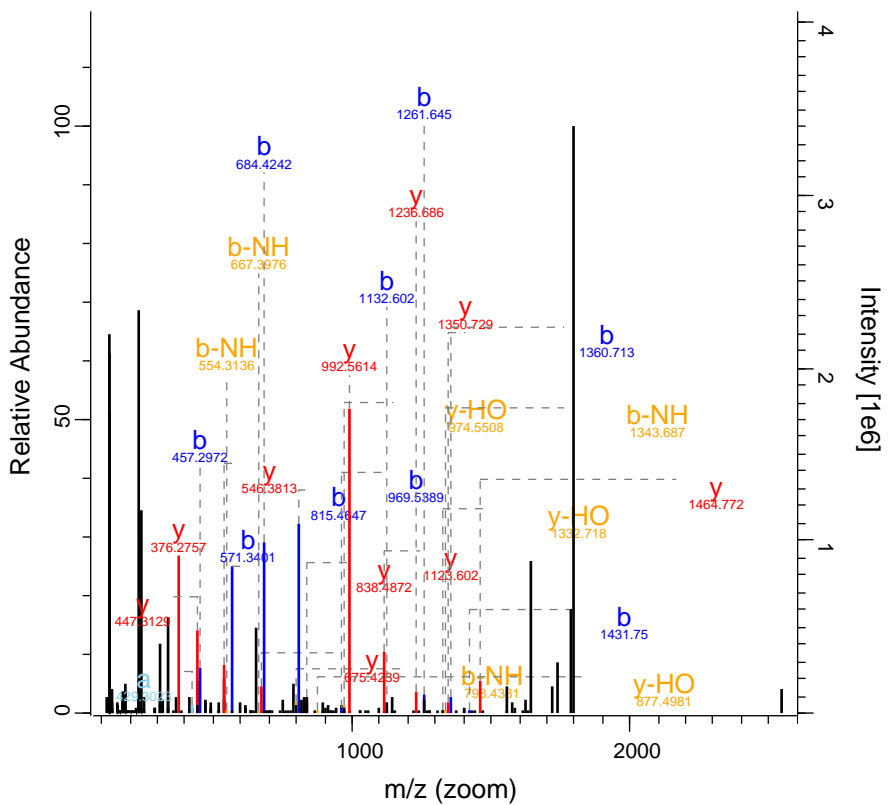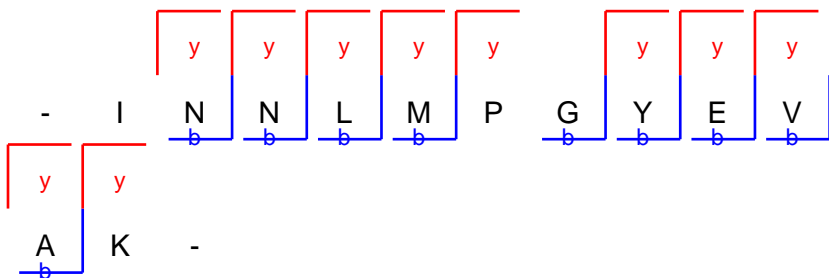

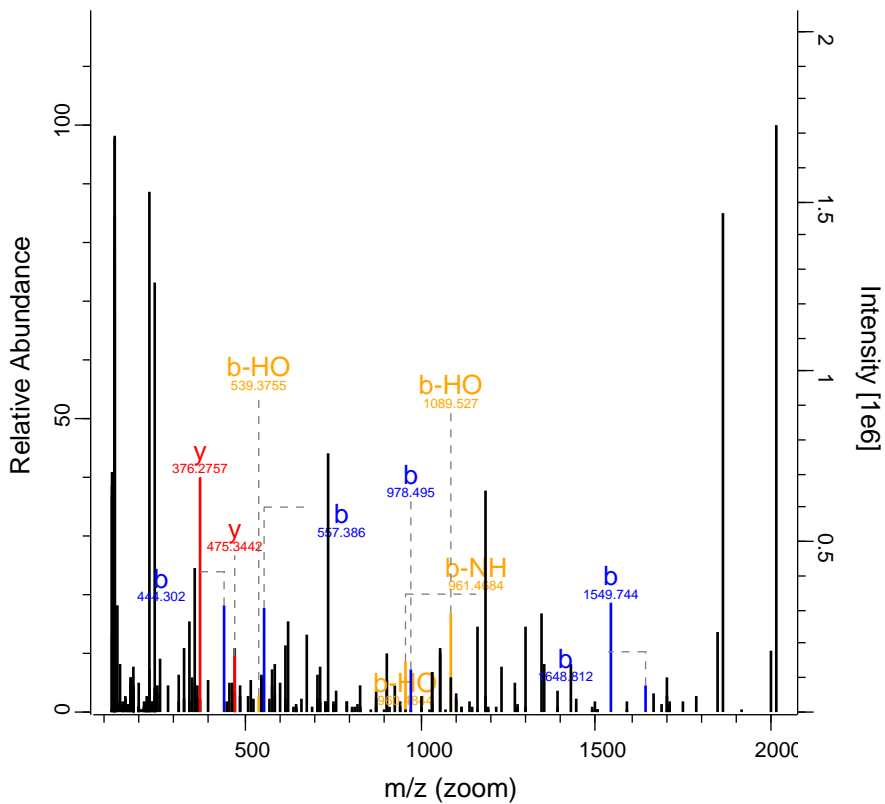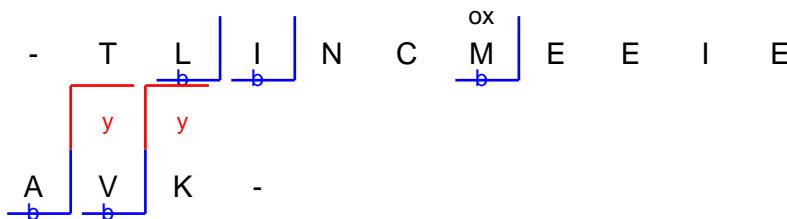

RO-QC-160121\_ZackD\_SS\_Set\_02\_Fraction 30995 FTMS; HC 83.42 843.46 ABHD5

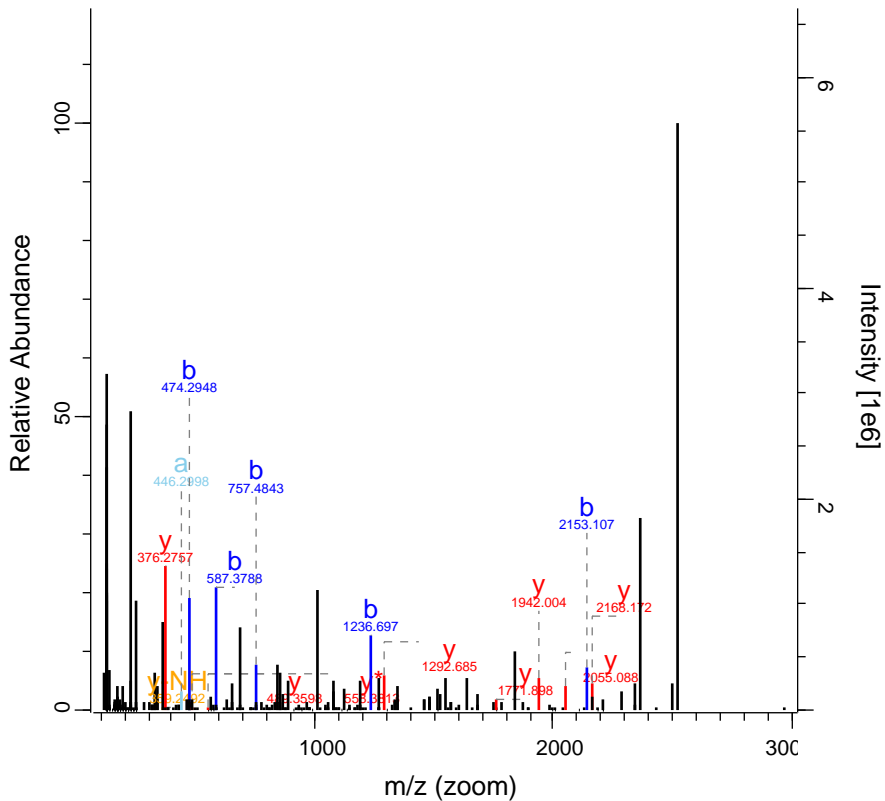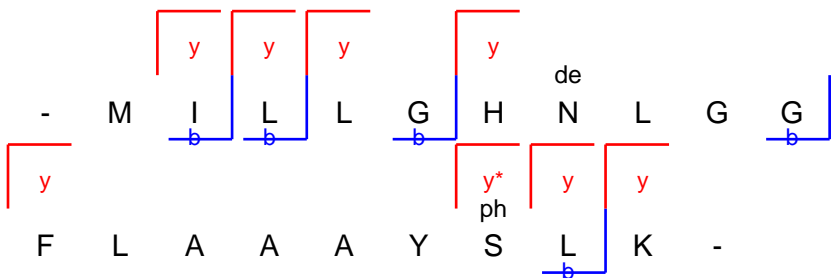



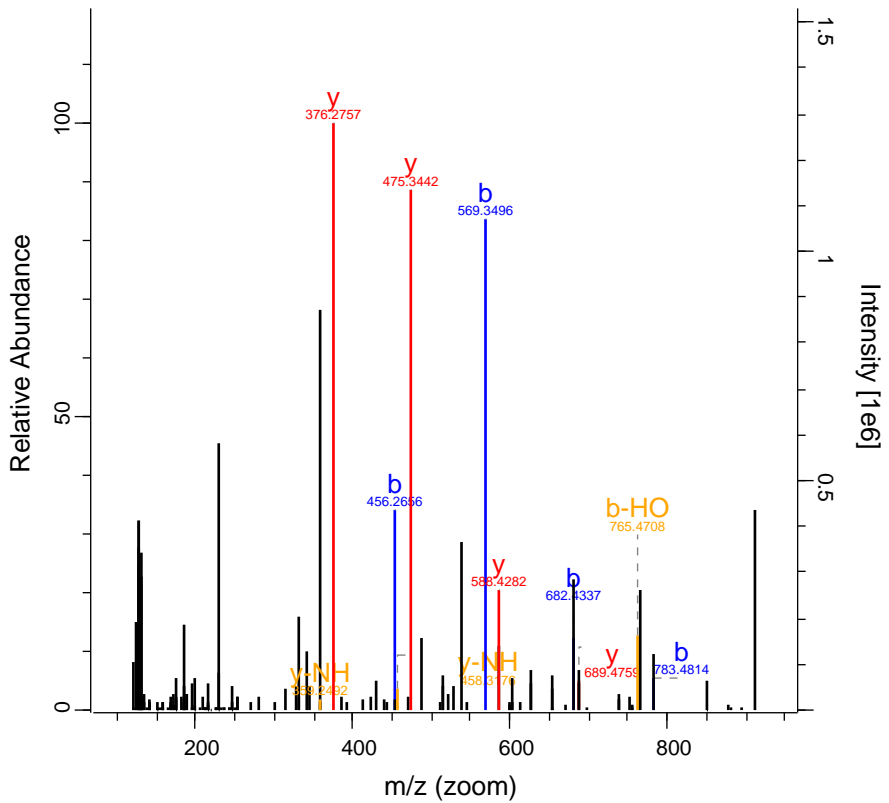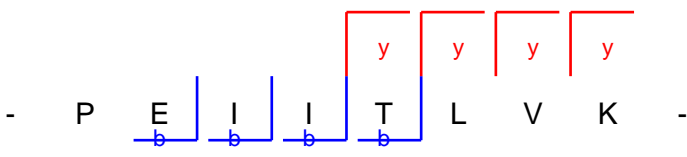

RO-QC-160121\_ZackD\_SS\_Set\_02\_Fraction 32650 FTMS; HC 61.96 963.03 CFAP99

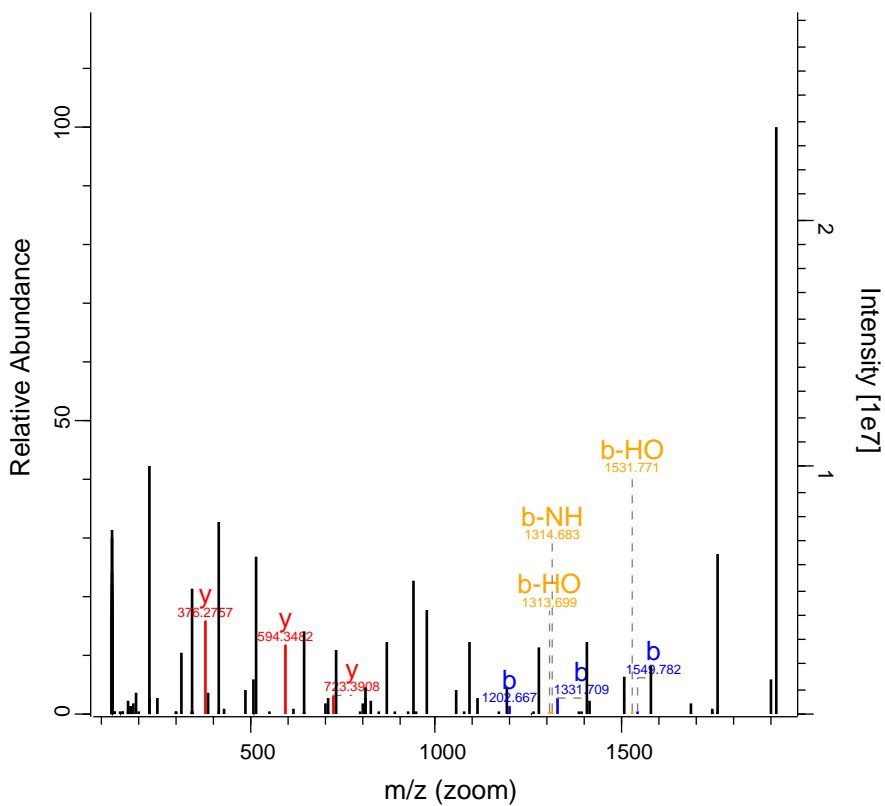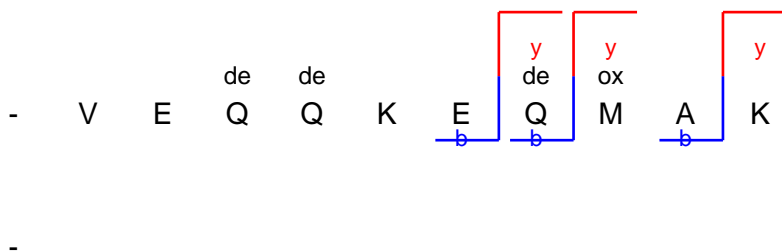

Raw File

Scan Method Score m/z

RO-QC-160121\_ZackD\_SS\_Set\_02\_Fraction\_8

34468 FTMS; HCD 51.85 789.96

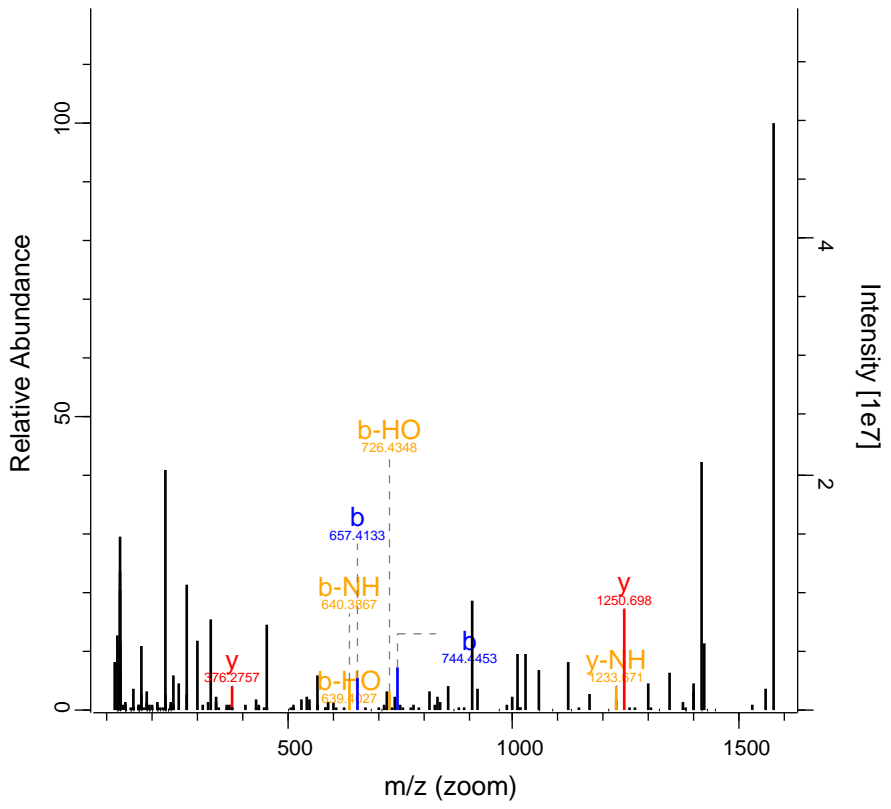

m/z (zoom)

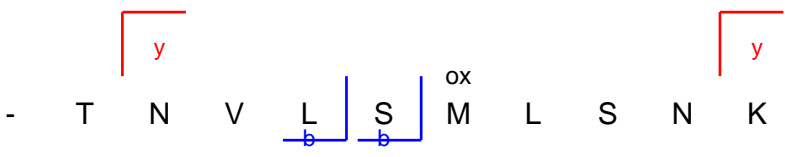

-

RO-QC-160121\_ZackD\_SS\_Set\_02\_Fraction 34973 FTMS; HC 92.84 890.03 ASH1L

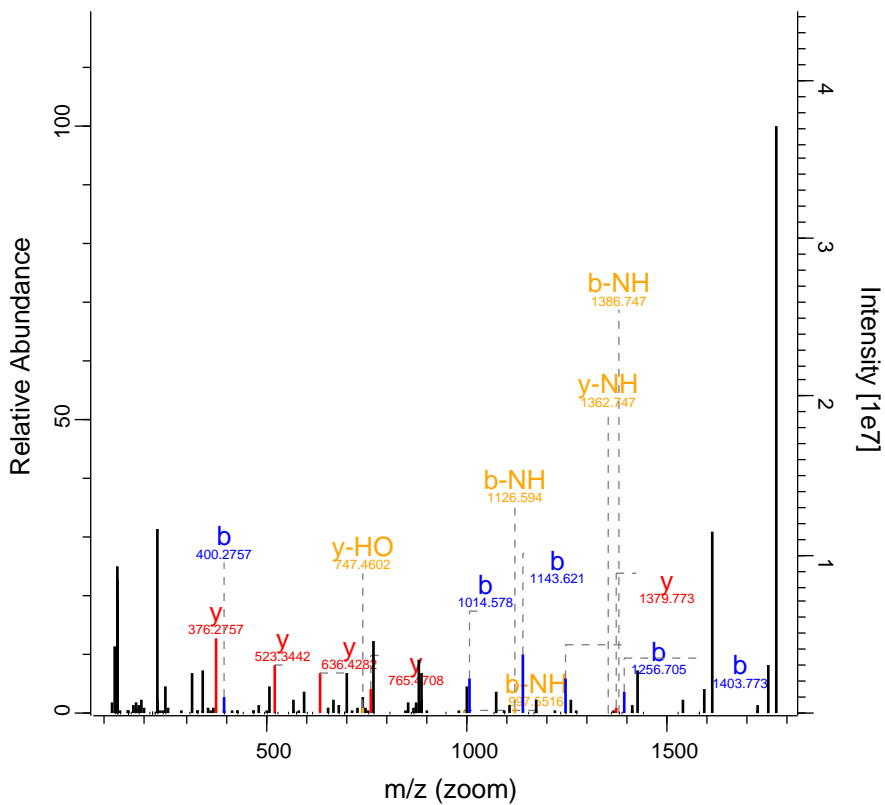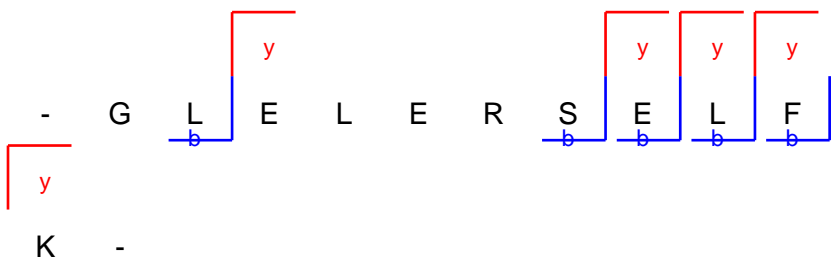

K -

RO-QC-160121\_ZackD\_SS\_Set\_02\_Fractio 36925 FTMS; HC 114.19 439.29 VCAM1

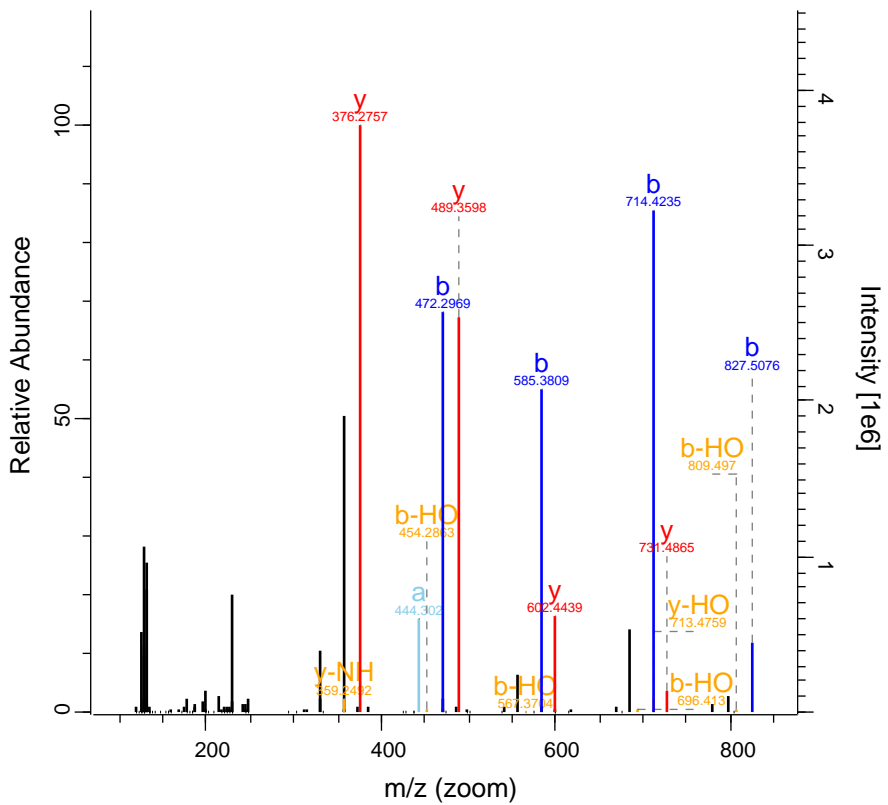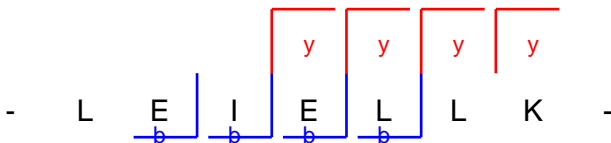

RO-QC-160121\_ZackD\_SS\_Set\_02\_Fraction 38037 FTMS; HC 94.45 627.05 ALKBH7

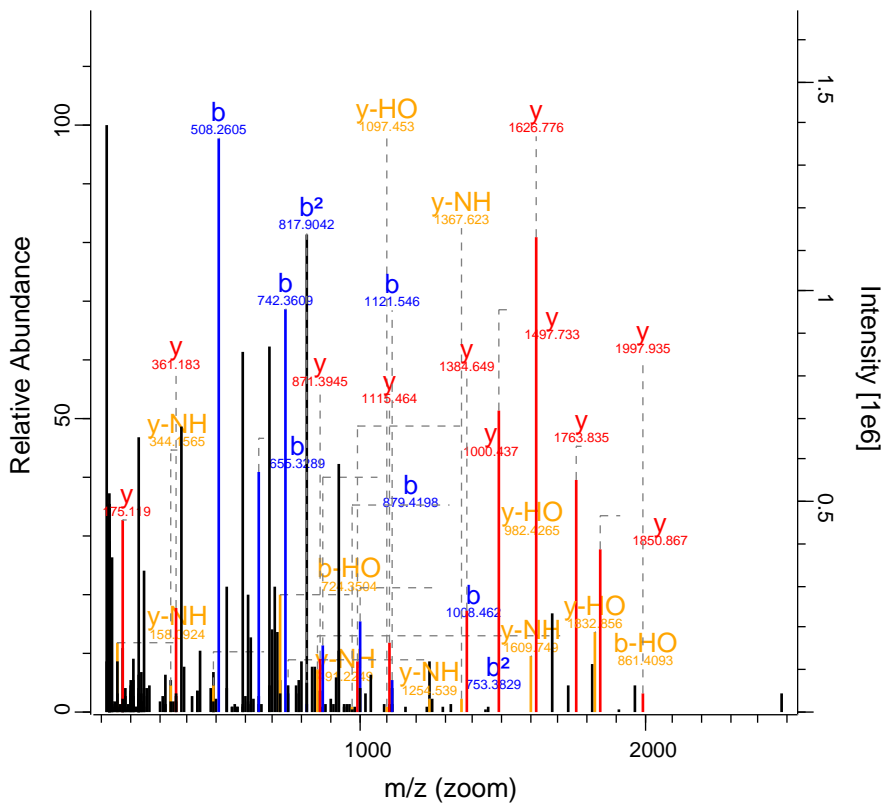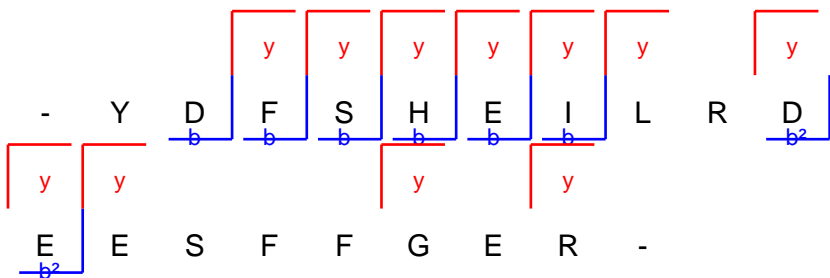

RO-QC-160121\_ZackD\_SS\_Set\_02\_Fractio 40964 FTMS; HC 110.77 744.08 C11orf84

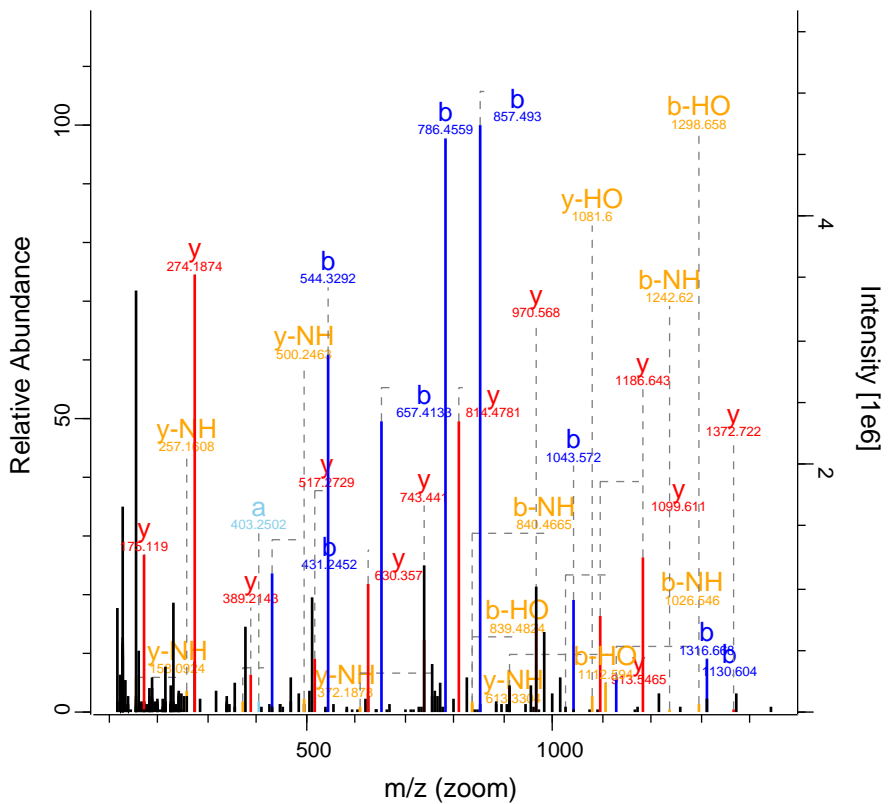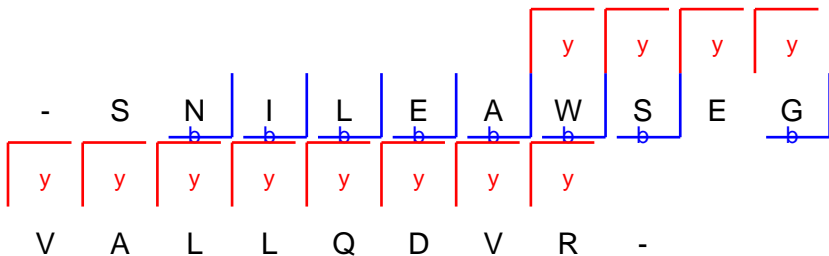

RO-QC-160121\_ZackD\_SS\_Set\_02\_Fractic 40984 FTMS; HC 69.38 1115.61 C11orf84

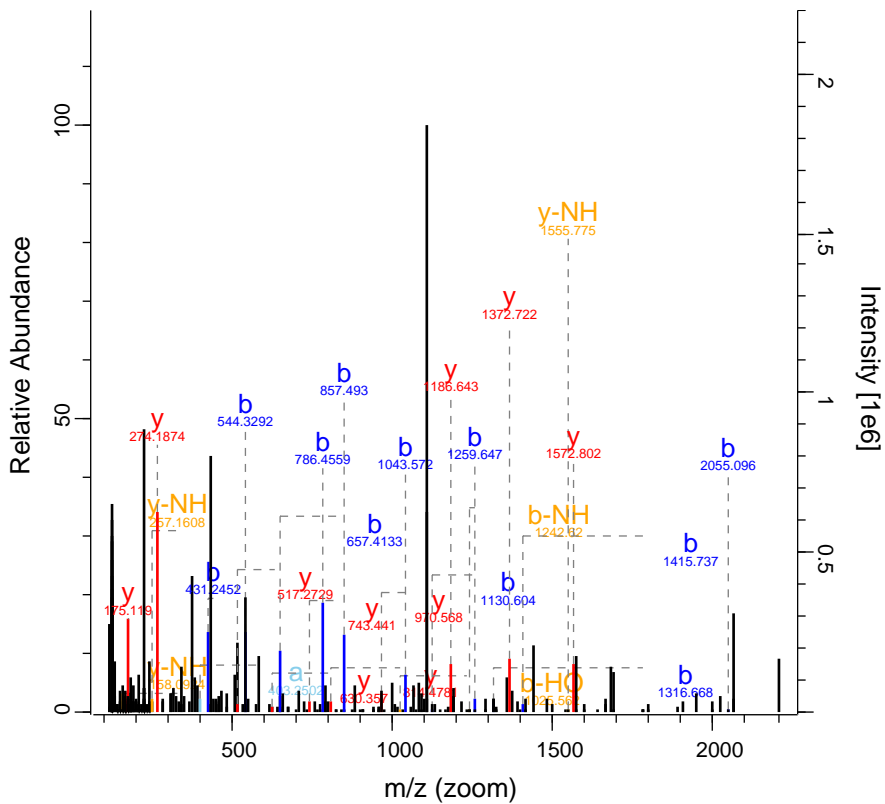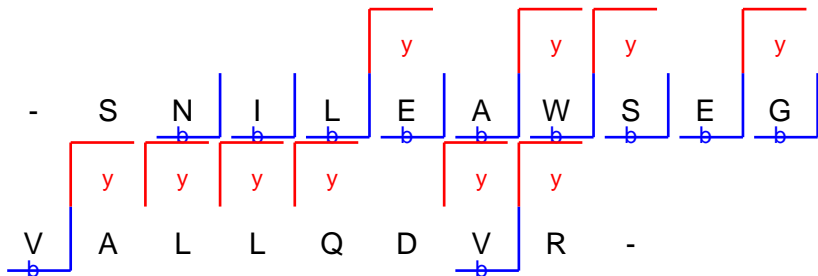



RO-QC-160121\_ZackD\_SS\_Set\_02\_Fraction 5472 FTMS; HCl 71.35 448.52 S100PBP

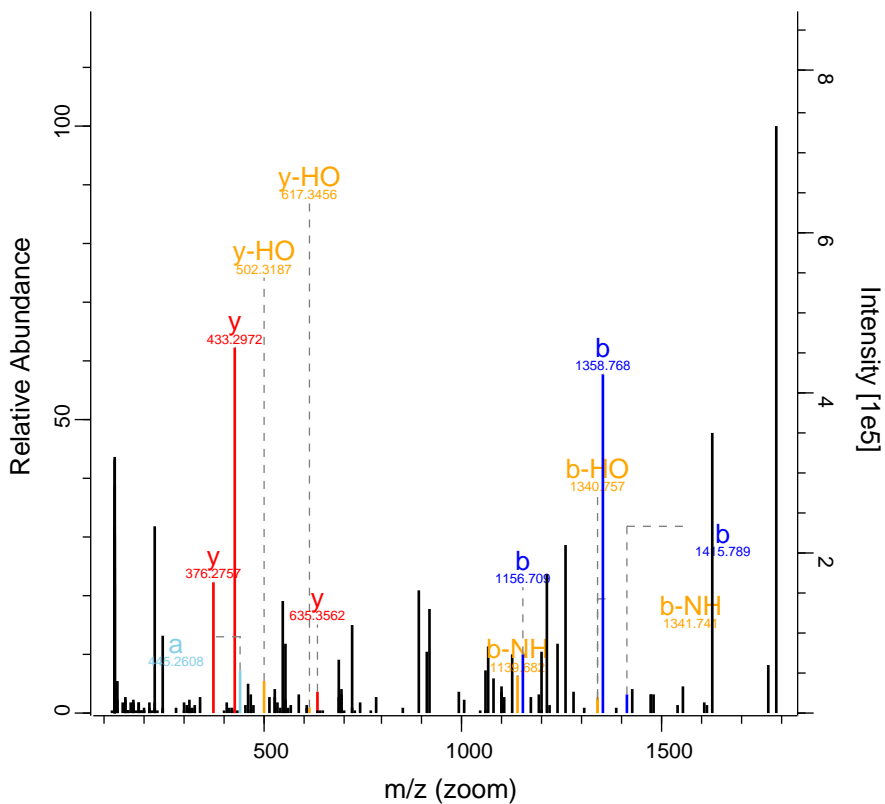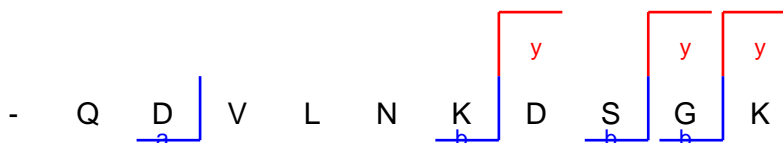





RO-QC-160121\_ZackD\_SS\_Set\_02\_Fraction 6238 FTMS; HCl 138.1 664.88 IMUP

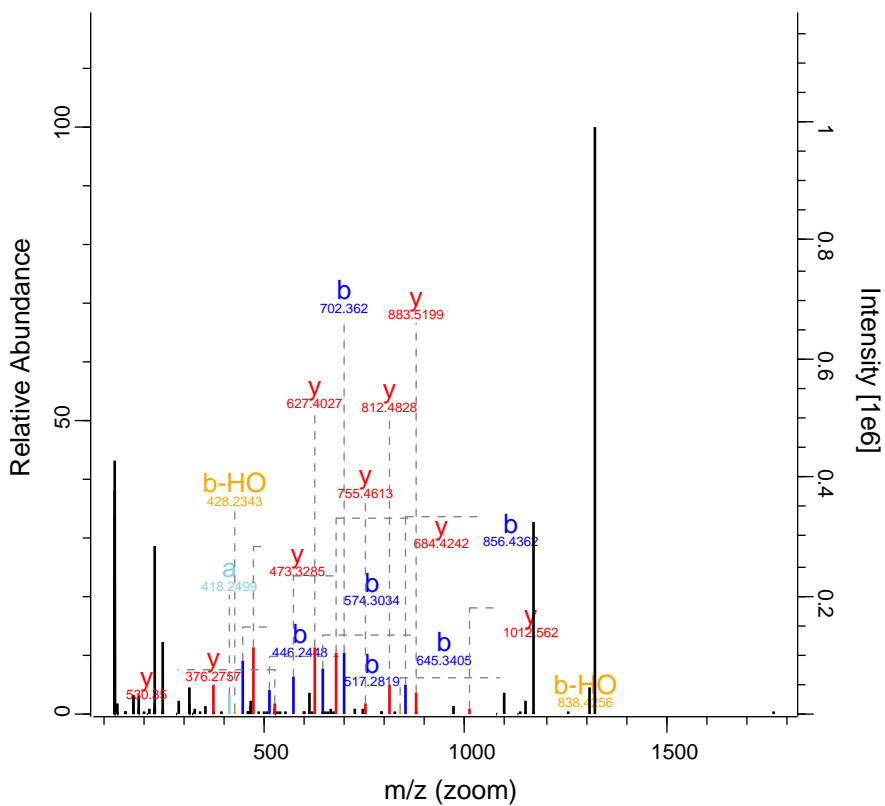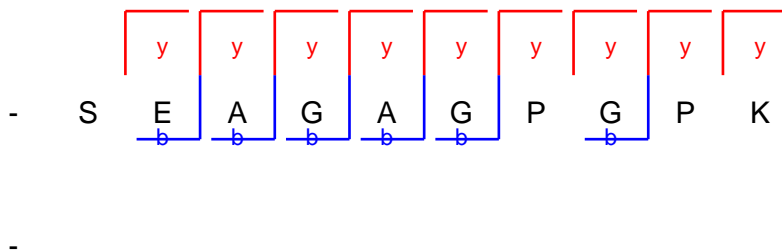

RO-QC-160121\_ZackD\_SS\_Set\_02\_Fraction\_9

7106 FTMS; HCD 33.59 352.79

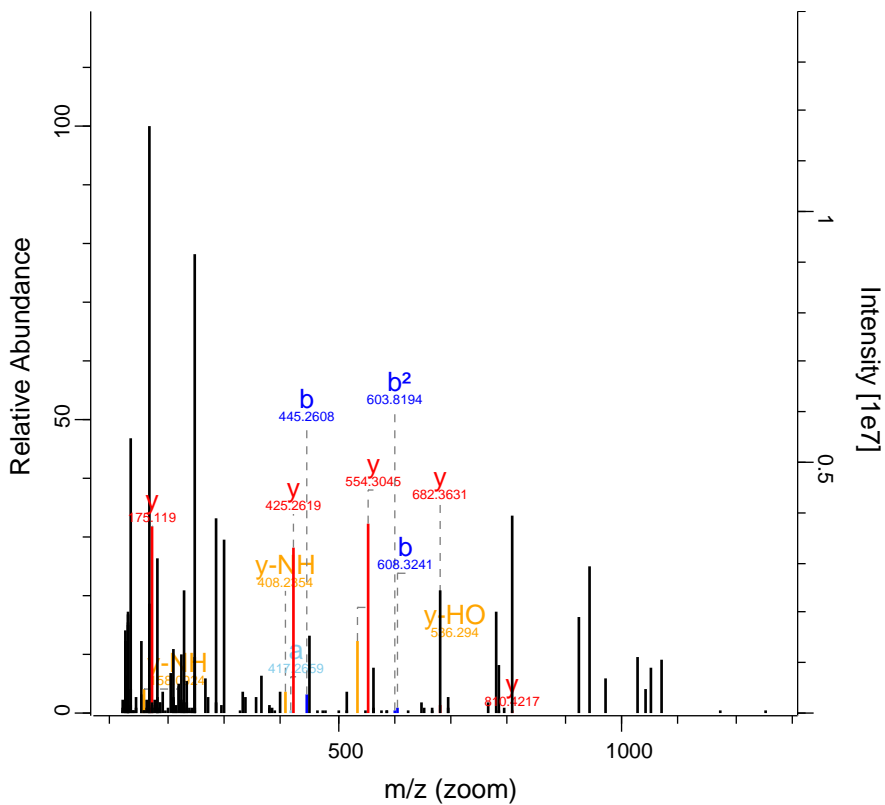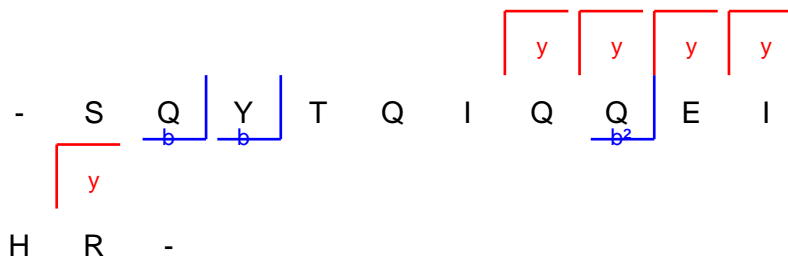

RO-QC-160121\_ZackD\_SS\_Set\_02\_Fraction 7607 FTMS; HCl 80.24 496.32 SLC35D1

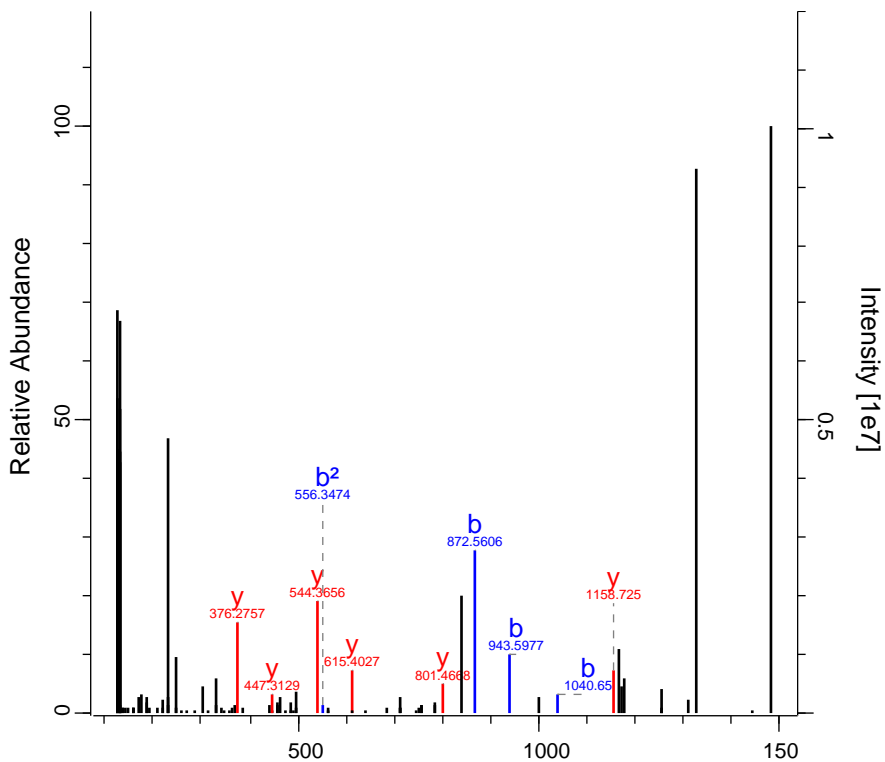

m/z (zoom)

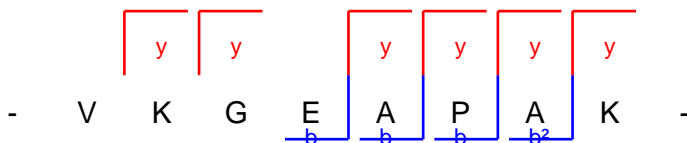

RO-QC-160121\_ZackD\_SS\_Set\_02\_Fraction 7633 FTMS; HC 180.97 796.94 ZMYM1

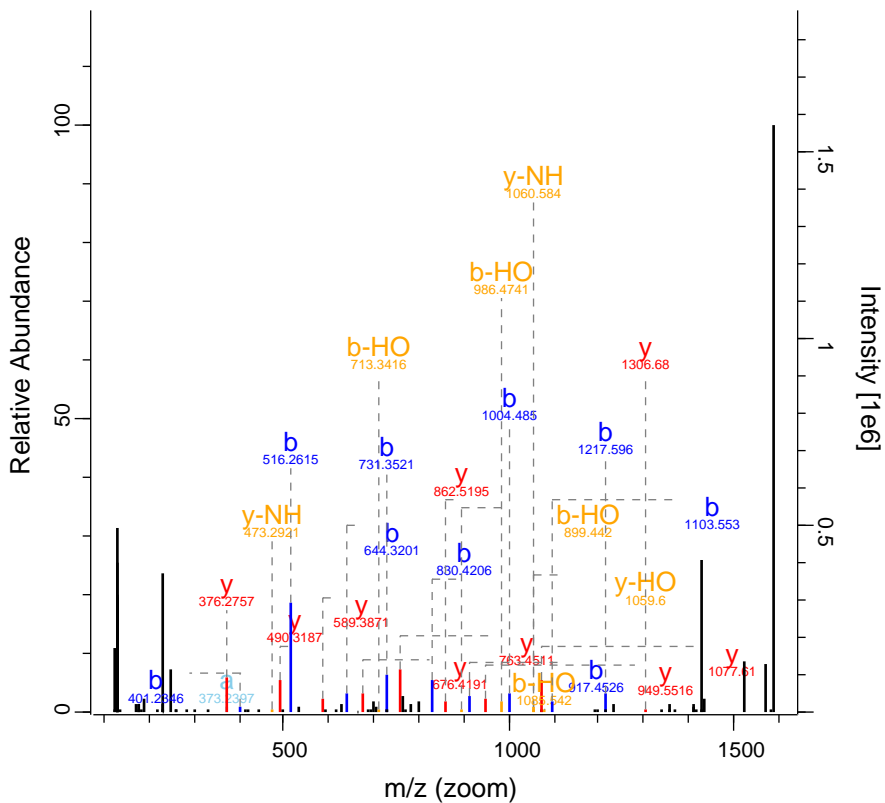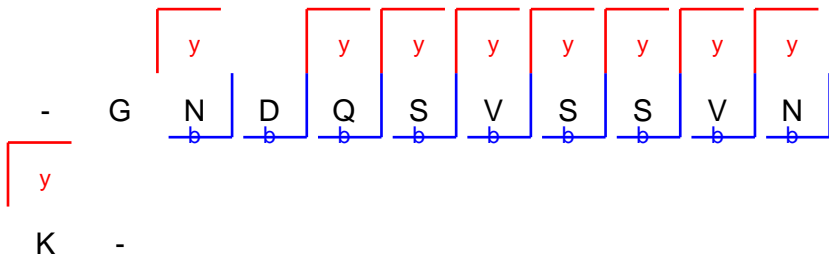

RO-QC-160121\_ZackD\_SS\_Set\_02\_Fraction 8557 FTMS; HCl 53.17 861.04 GLYCTK

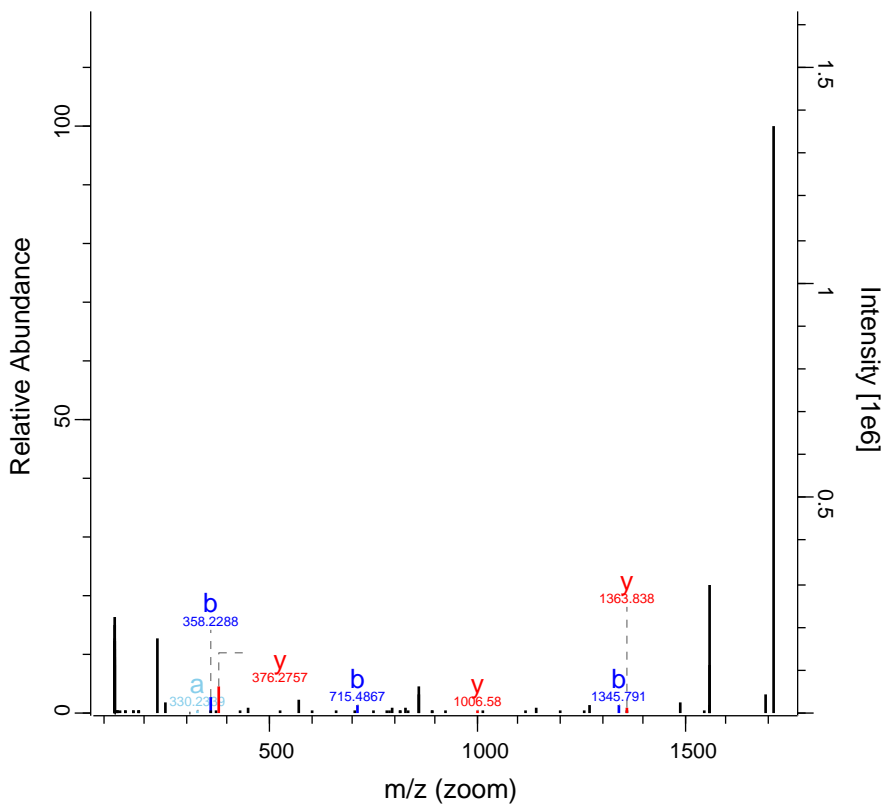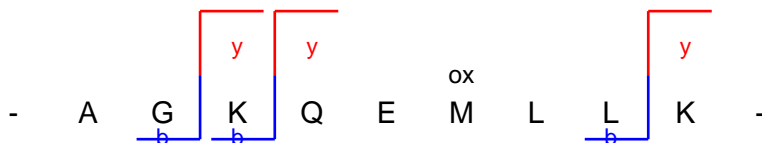



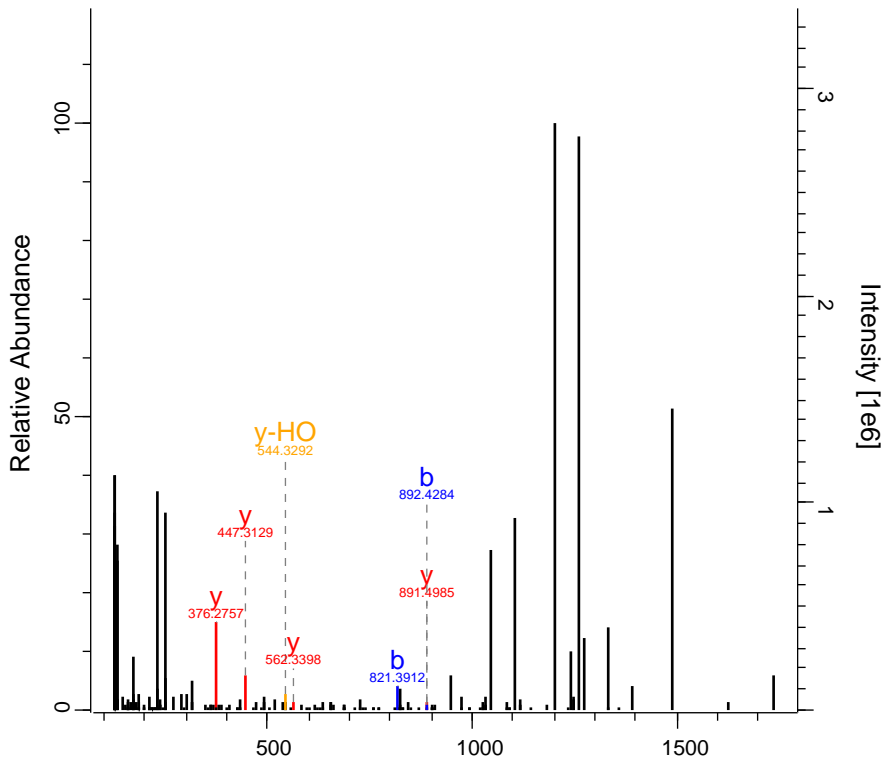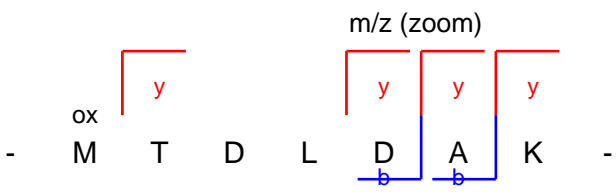

RO-QC-160121\_ZackD\_SS\_Set\_02\_Fraction 8962 FTMS; HCl 58.68 390.48 RUNDC3B

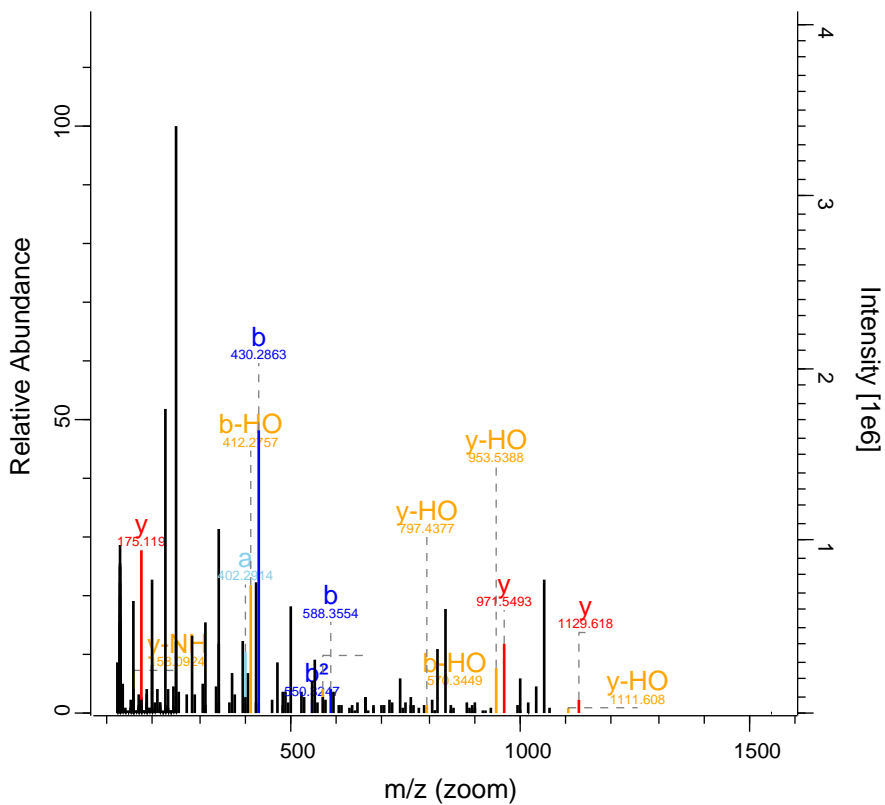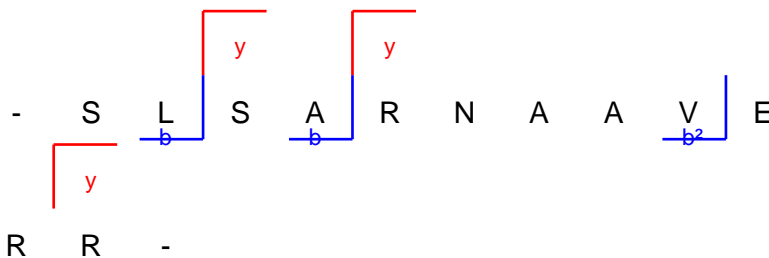

RO-QC-160121\_ZackD\_SS\_Set\_02\_Fraction 9116 FTMS; HC 107.66 652.39 PAX9

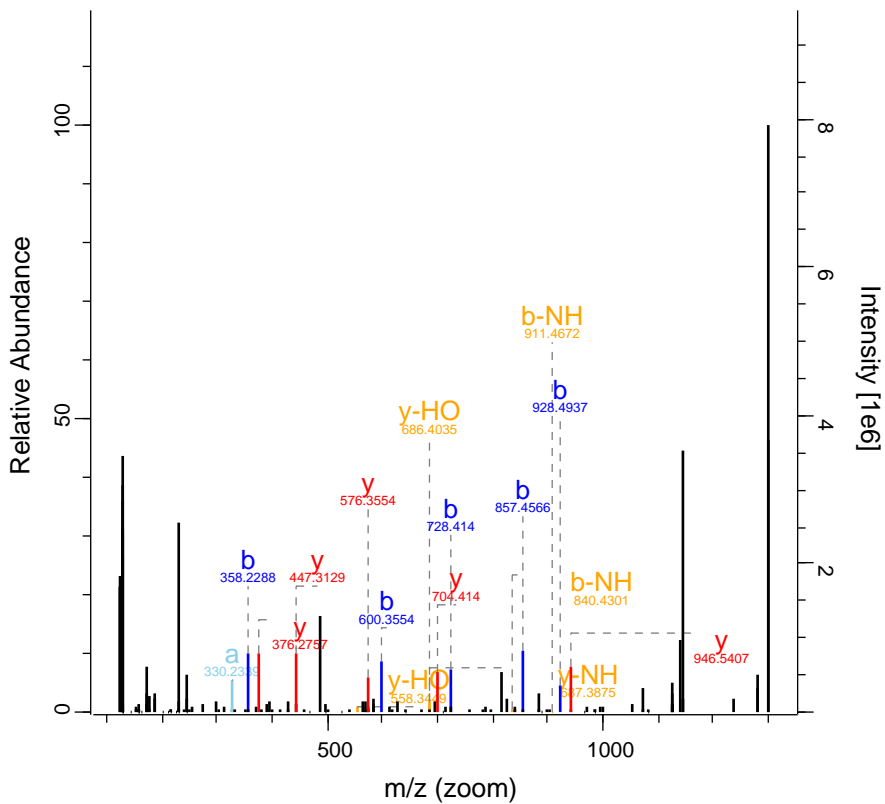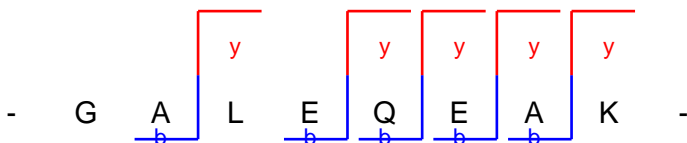

RO-QC-160121\_ZackD\_SS\_Set\_02\_Fraction 9521 FTMS; HCl 71.98 531.97 PEX16

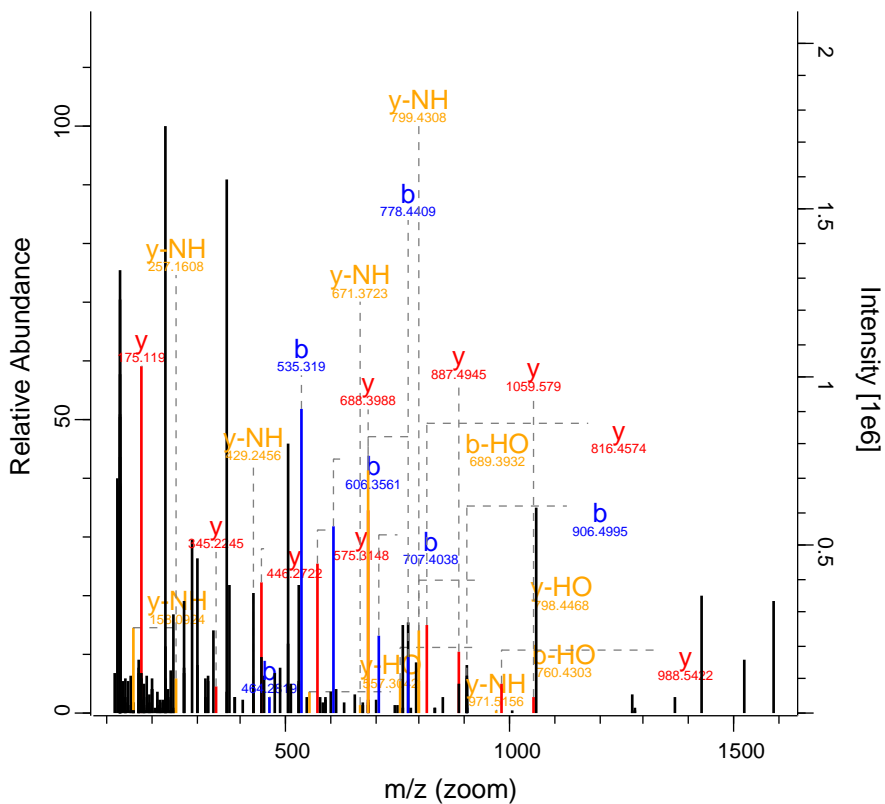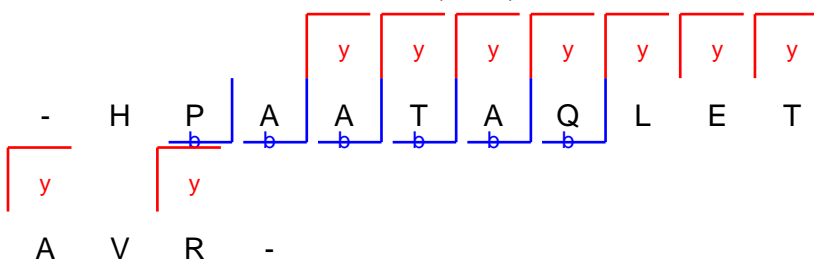

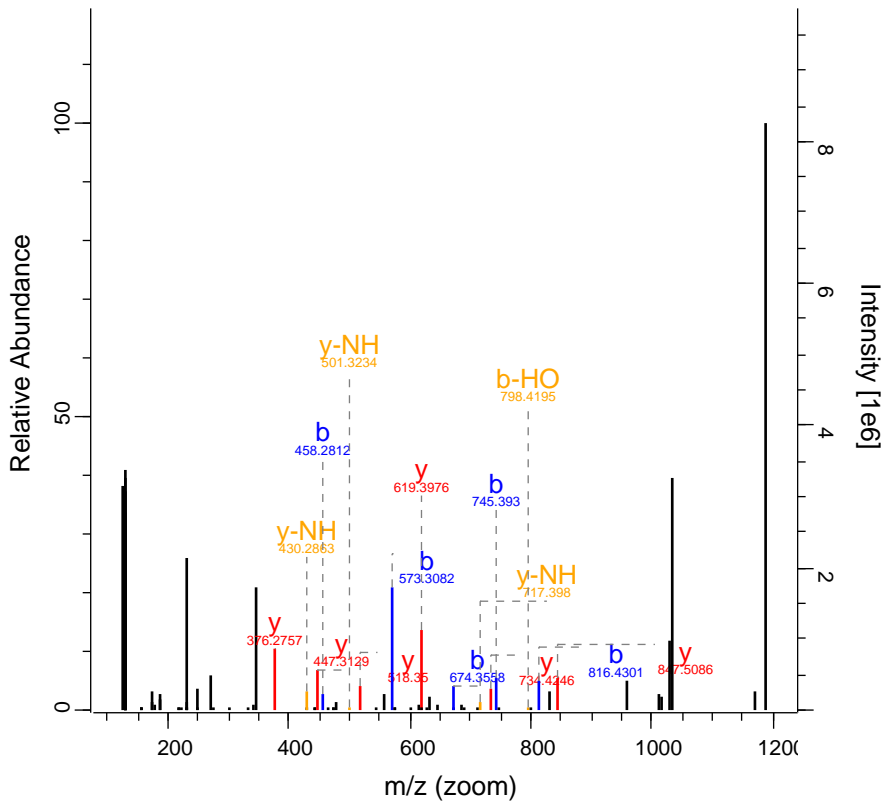

RO-QC-160121\_ZackD\_SS\_Set\_02\_Fr 10304 FTMS; H(130.77 596.35) ATP5G1;ATP5G2;ATP

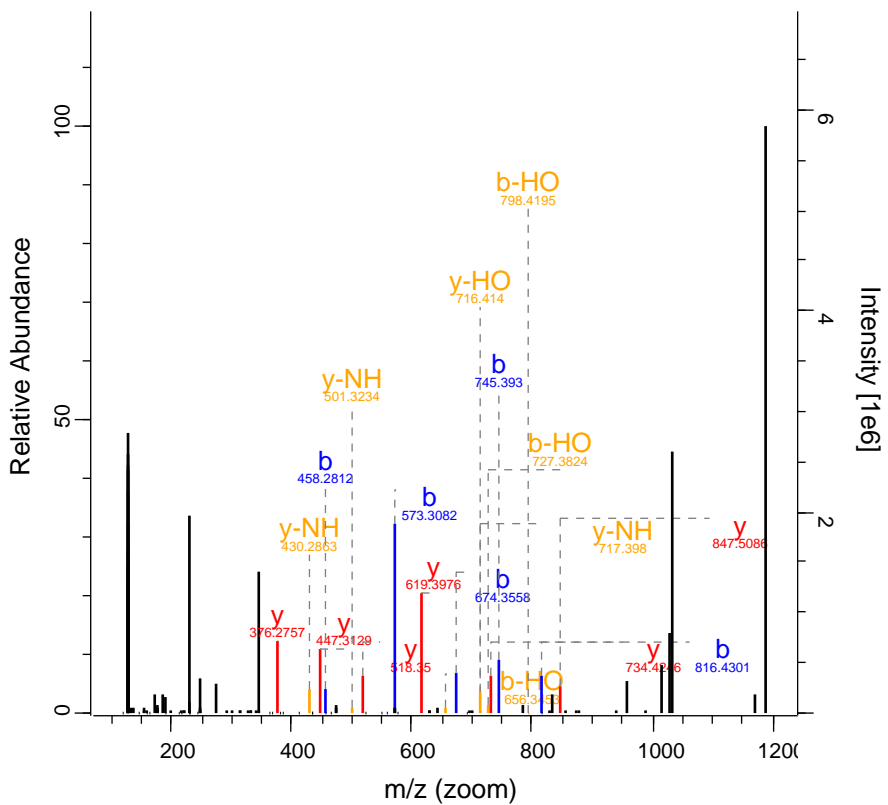

RO-QC-160121\_ZackD\_SS\_Set\_02\_Fractic 10800 FTMS; HC 51.19 1038.53 USP43

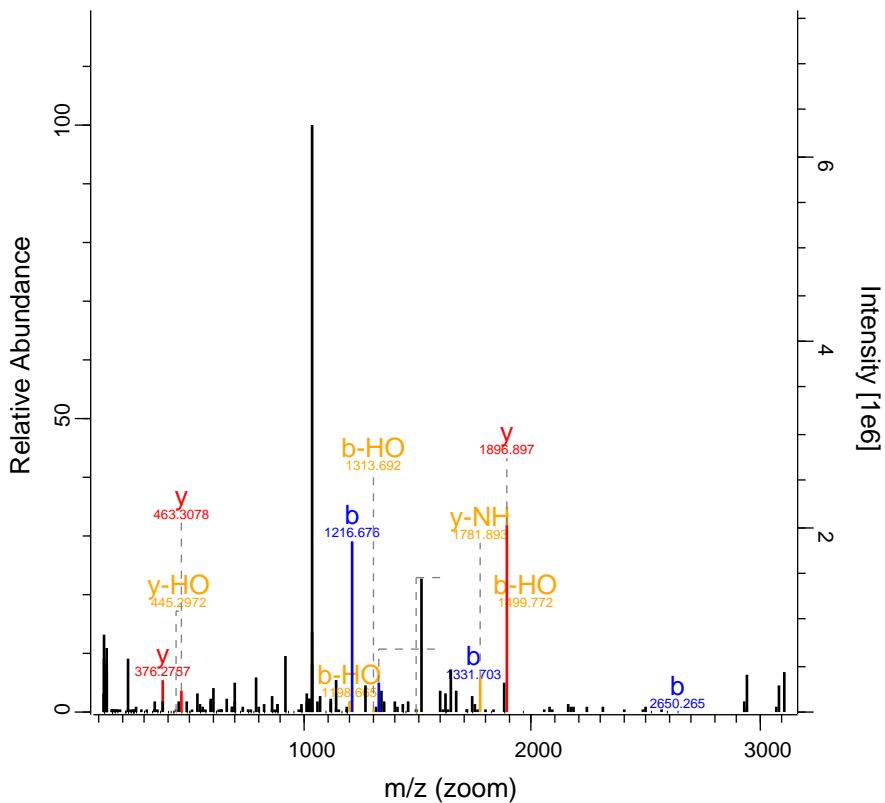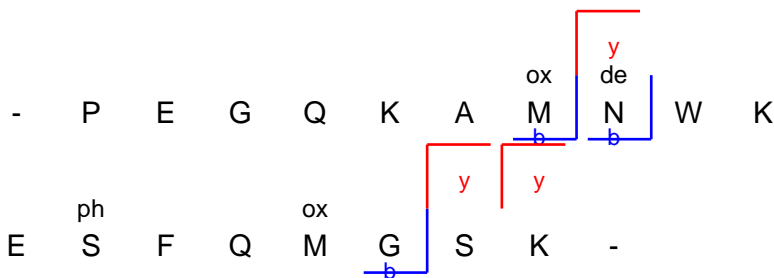

RO-QC-160121\_ZackD\_SS\_Set\_02\_Fractio 13040 FTMS; HC 137.16 744.89 APH1B

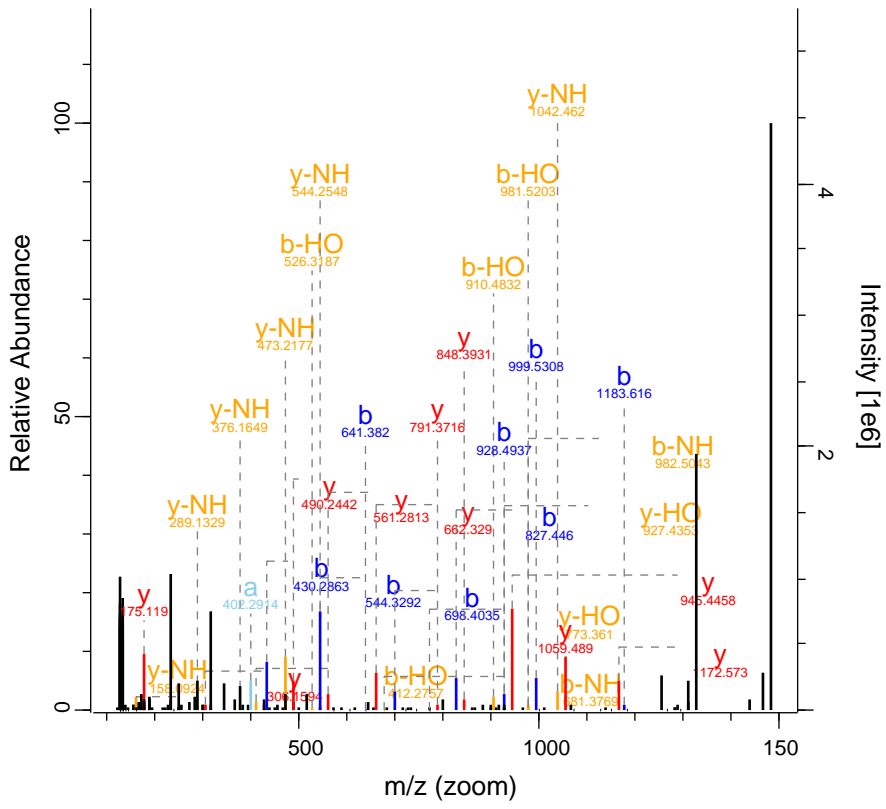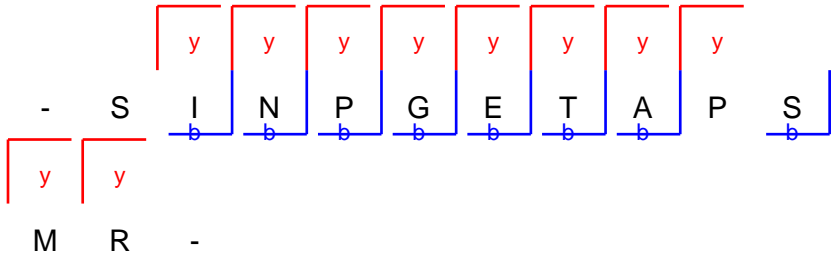

M R -



RO-QC-160121\_ZackD\_SS\_Set\_02\_Fraction 13948 FTMS; HC 145.9 719.89 CYSTM1

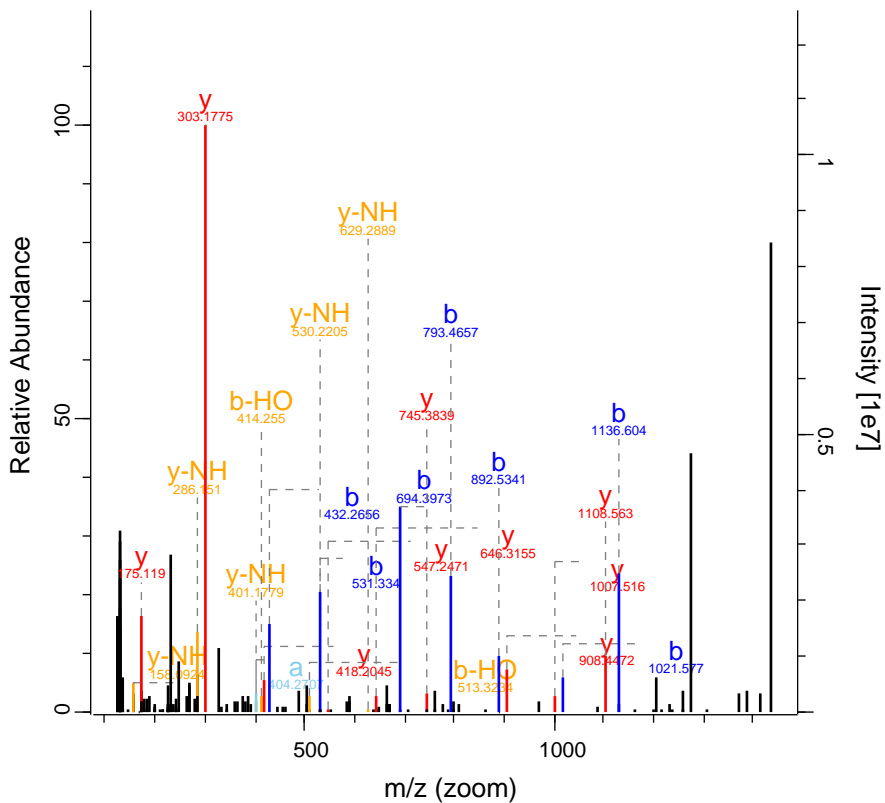

m/z (zoom)

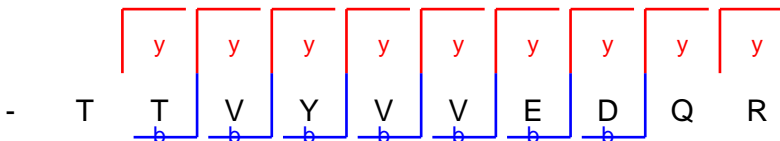

RO-QC-160121\_ZackD\_SS\_Set\_02\_Fraction 14209 FTMS; HC 74.2 720.39 CYSTM1

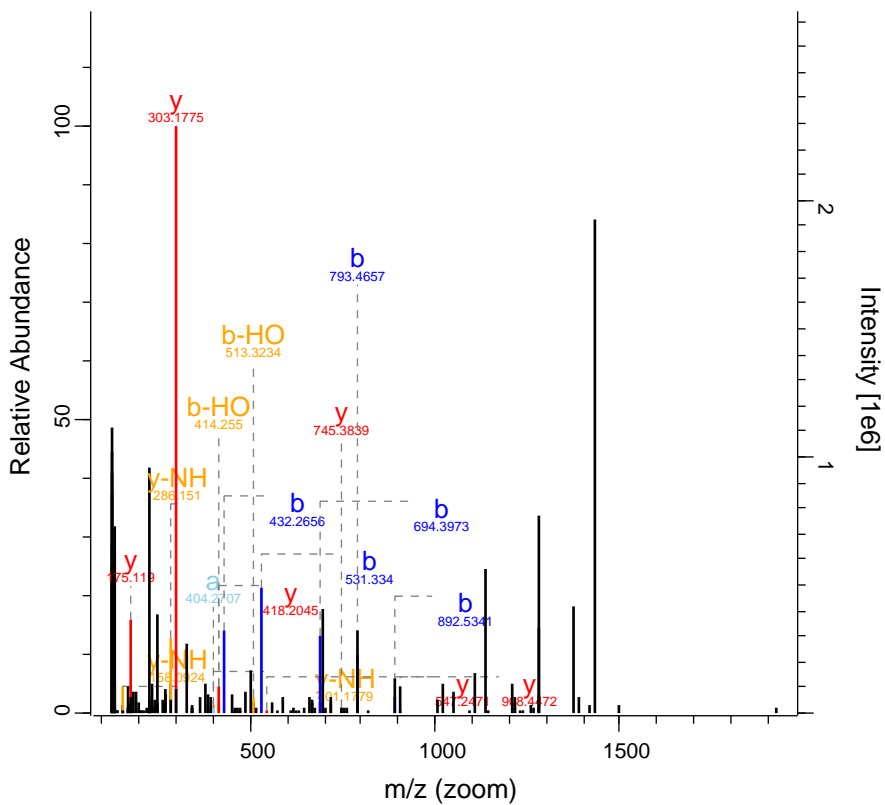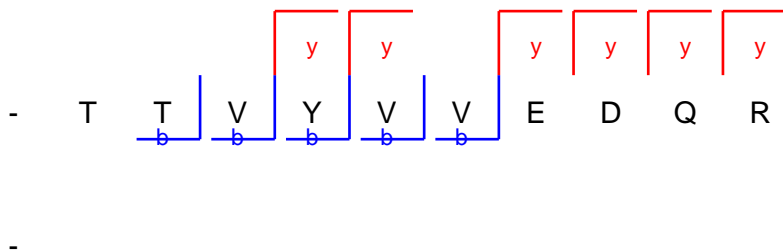

RO-QC-160121\_ZackD\_SS\_Set\_02\_Fraction 14306 FTMS; HC 68.38 709.89 FBXL19

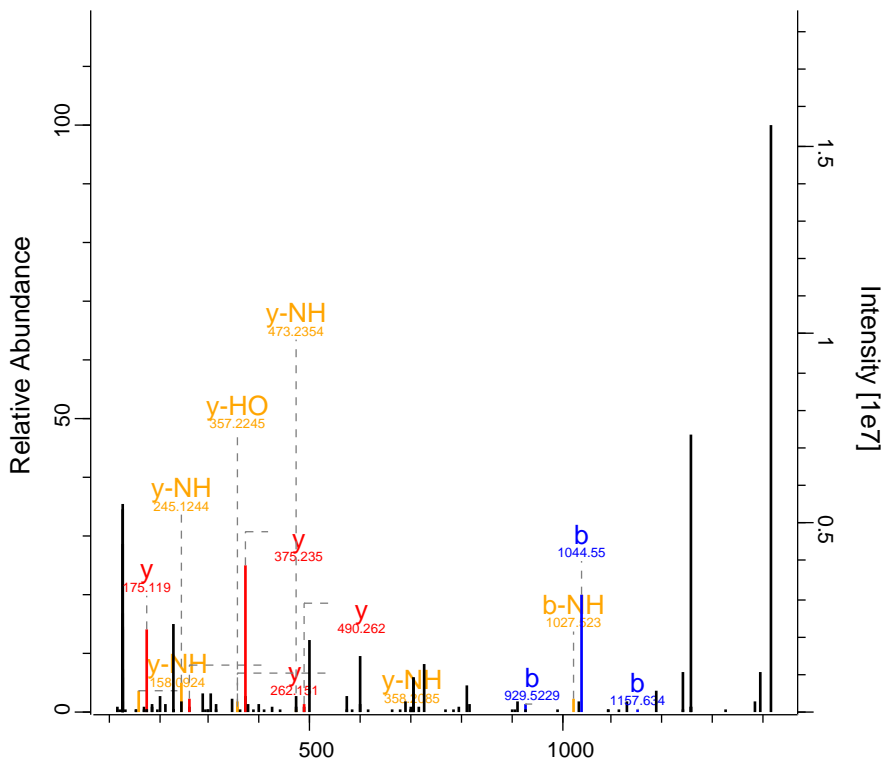

m/z (zoom)

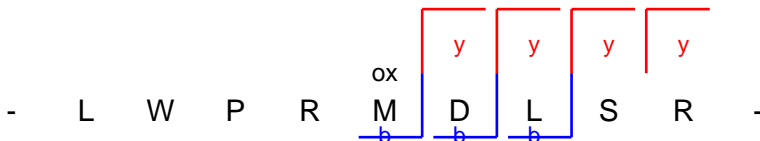

RO-QC-160121\_ZackD\_SS\_Set\_02\_Fraction 14360 FTMS; HC 82.28 403.73 MED7

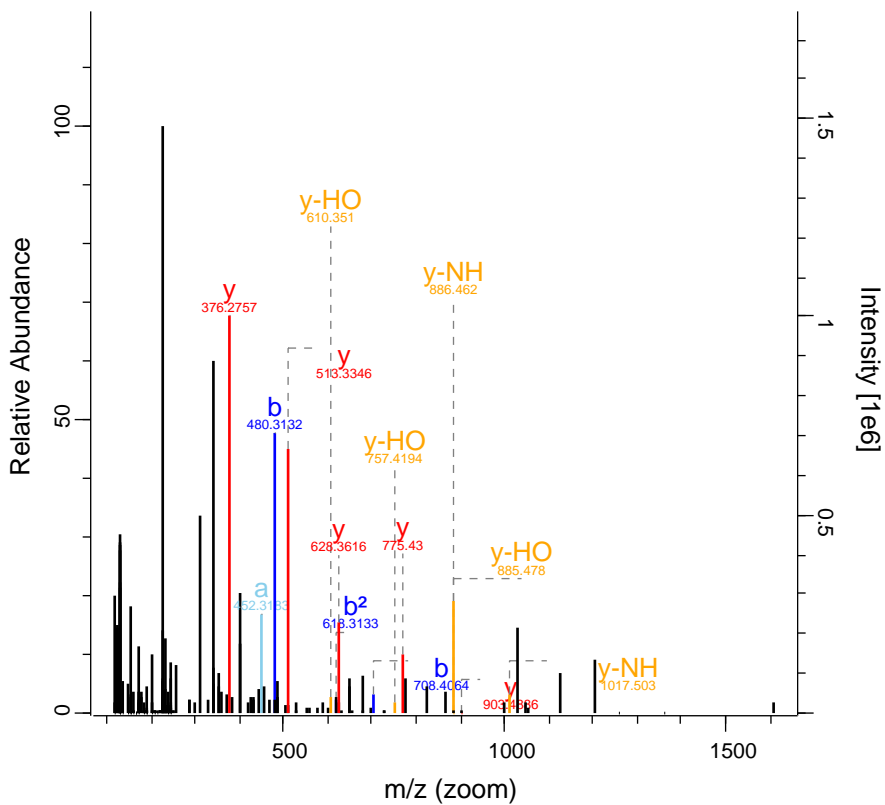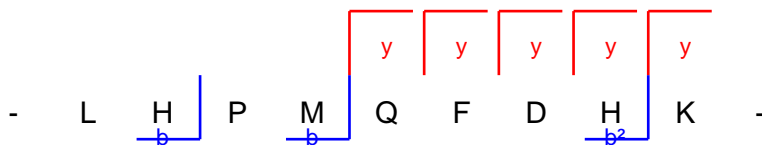

RO-QC-160121\_ZackD\_SS\_Set\_02\_Fractio 15997 FTMS; HC 136.57 463.31 TMC1

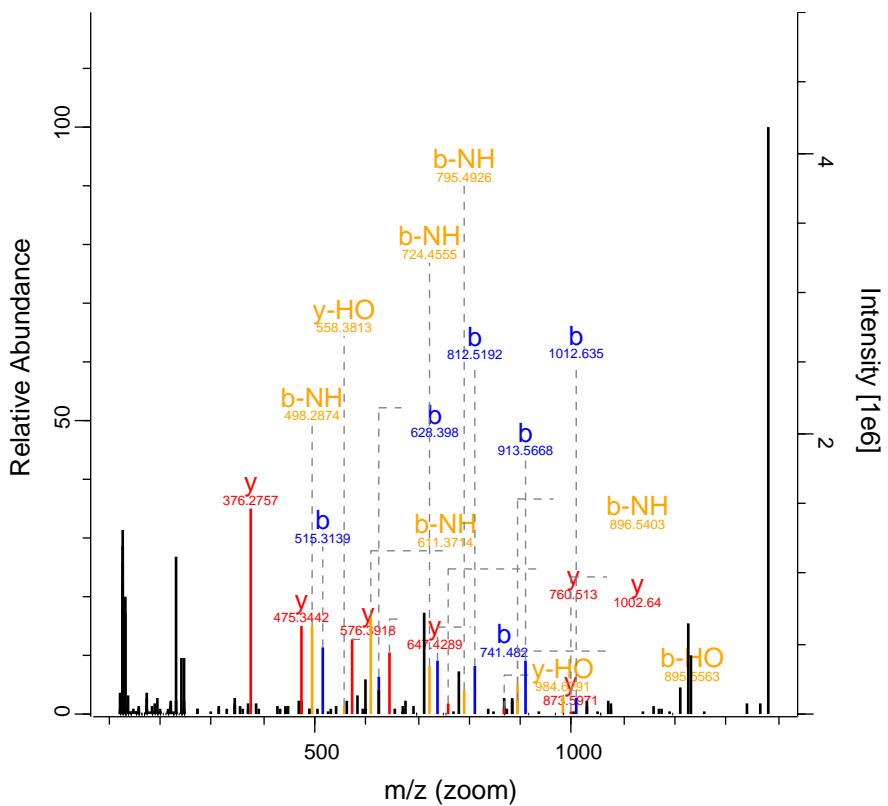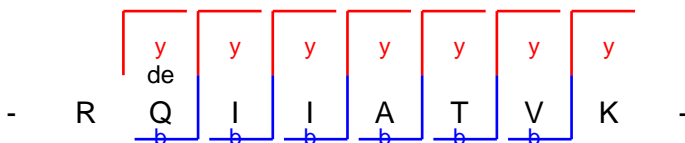

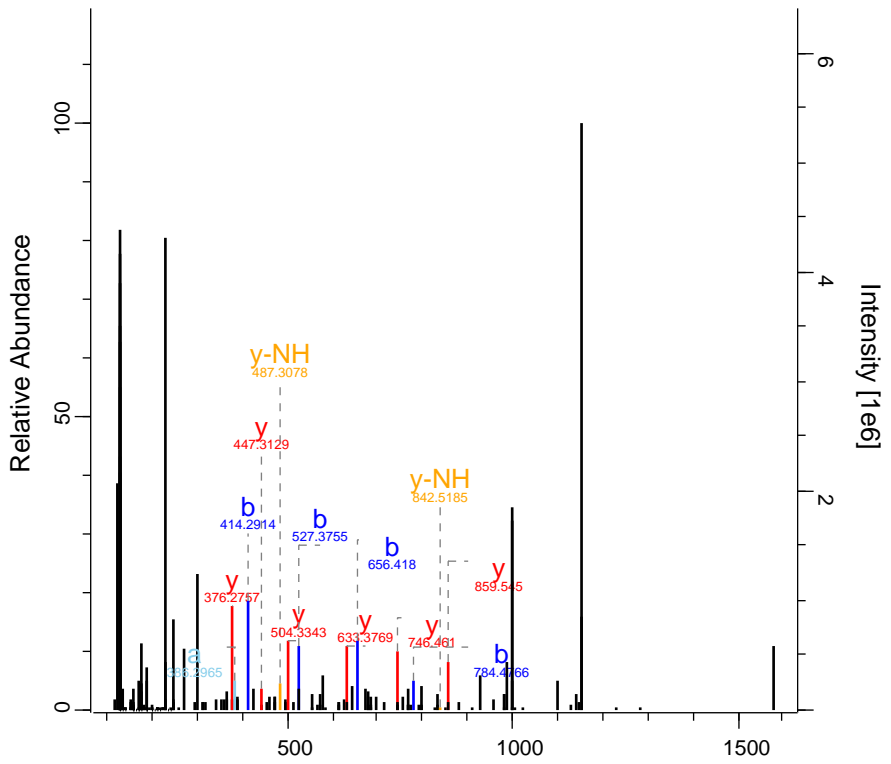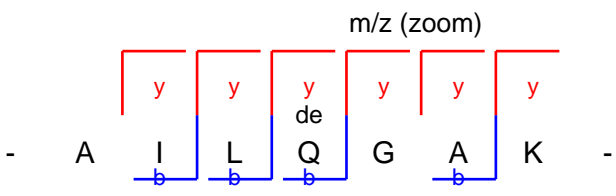



RO-QC-160121\_ZackD\_SS\_Set\_02\_Fraction 18414 FTMS; HC 50.04 640.86 PROK2

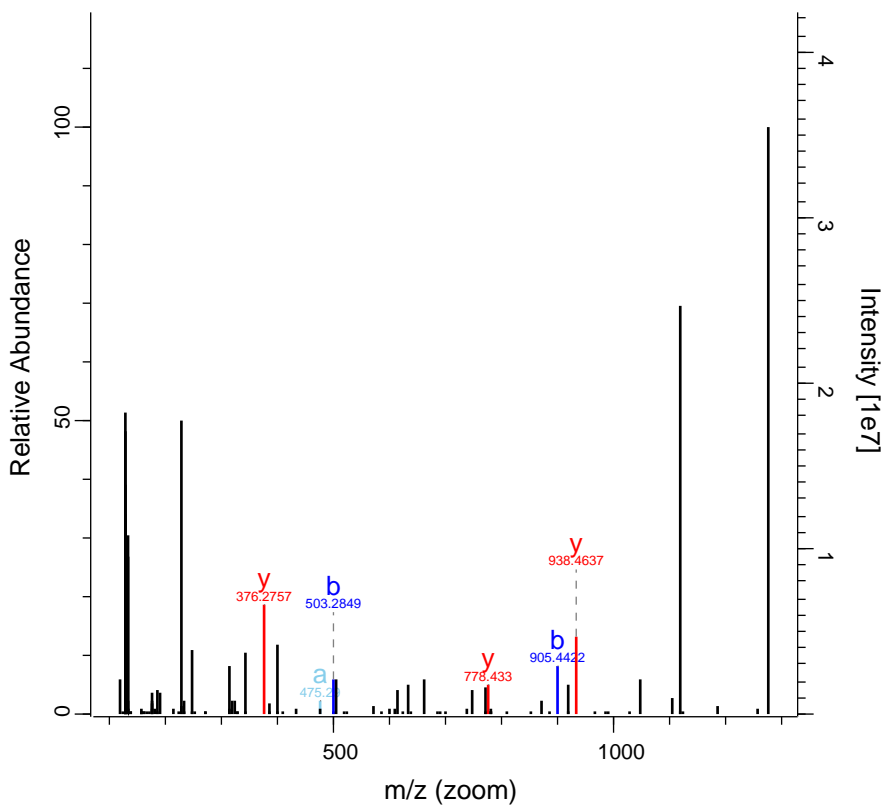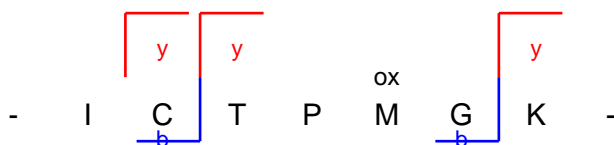



RO-QC-160121\_ZackD\_SS\_Set\_02\_Fraction 18660 FTMS; HC 50.04 640.86 PROK2

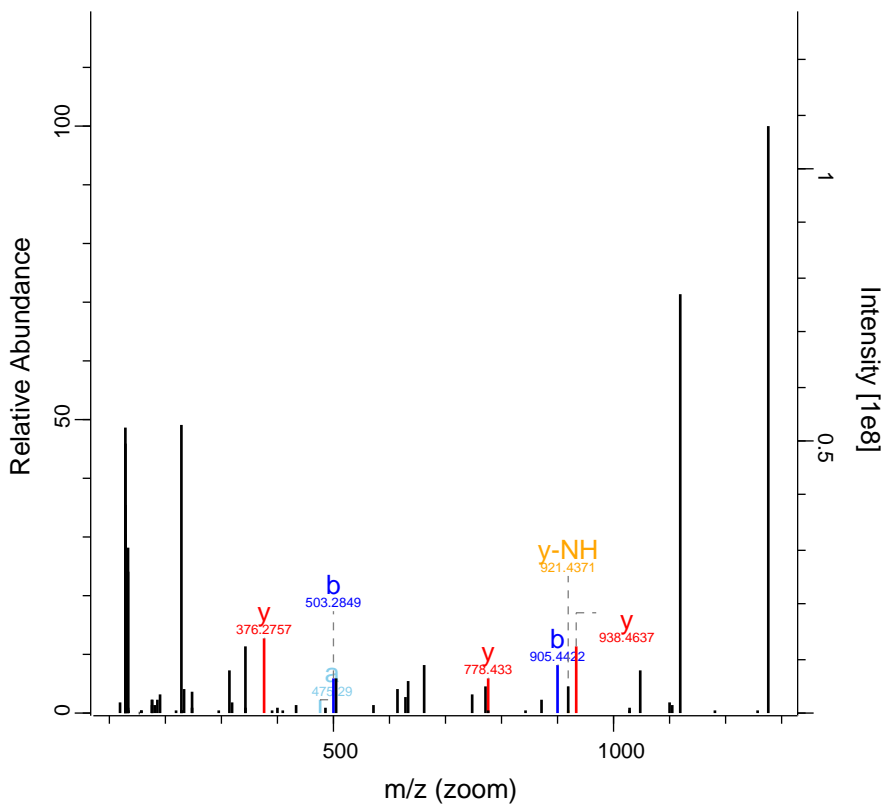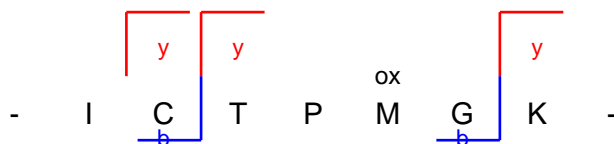

RO-QC-160121\_ZackD\_SS\_Set\_02\_Fraction 18710 FTMS; HC 43.51 537.56 CCDC60

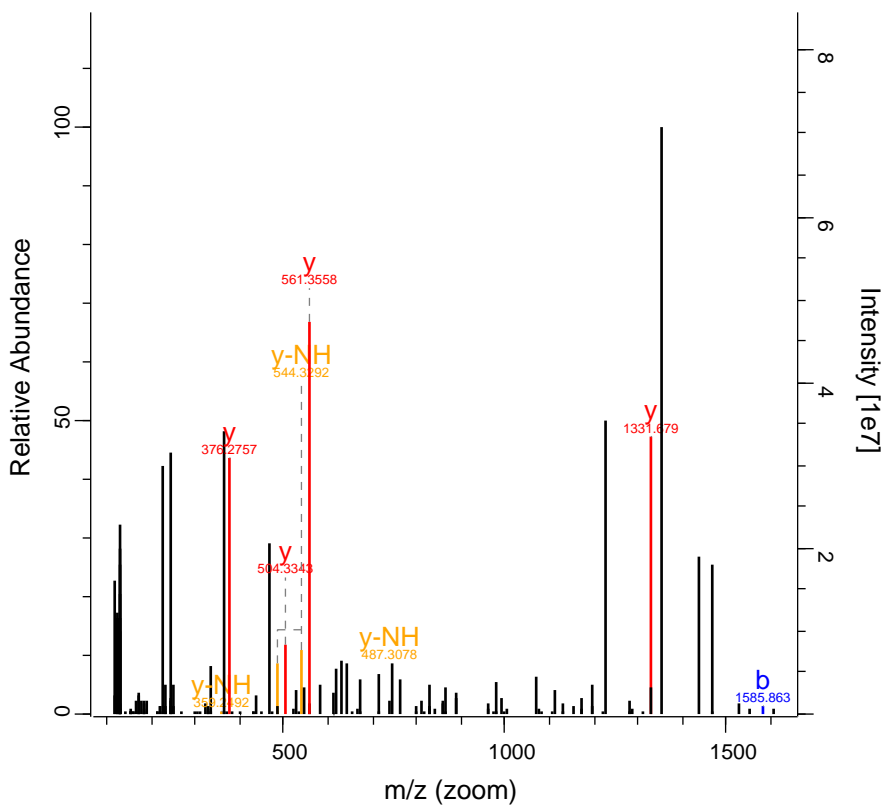

Fragmentation diagram showing the sequence of amino acids: I, N, K, D, K, S, M, G, Q, K. The diagram indicates the fragmentation points (y and b) and the resulting fragments (y and y-NH).

Sequence: I N K D K S M G Q K

Fragmentation points: y (between K and D), y (between M and G), y (between G and Q), y (between Q and K). b (between M and G).



RO-QC-160121\_ZackD\_SS\_Set\_02\_Fraction 19561 FTMS; HC 45.43 651.11 DNAH9

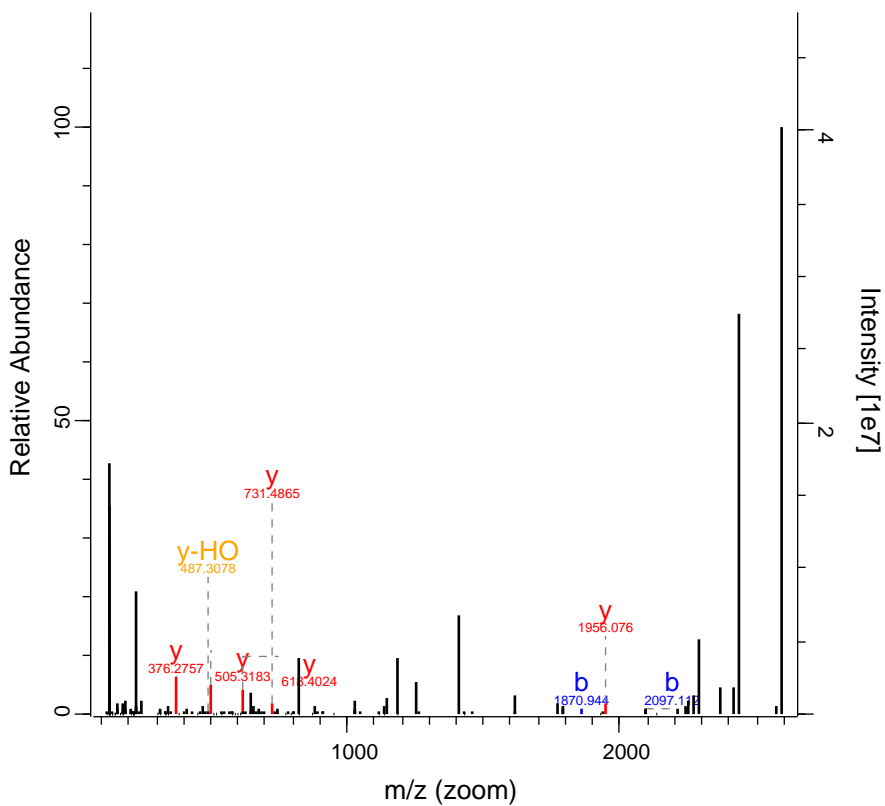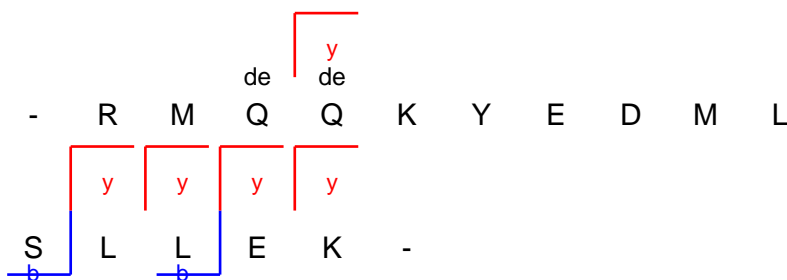

RO-QC-160121\_ZackD\_SS\_Set\_02\_Fraction 20228 FTMS; HC 41.54 451.51 TMCC2

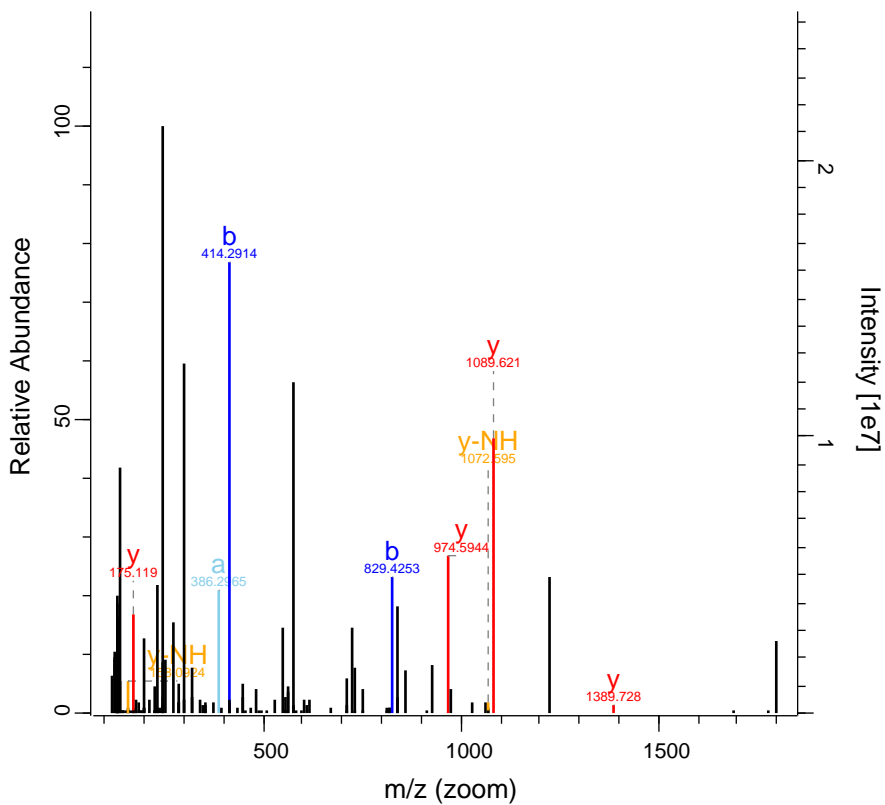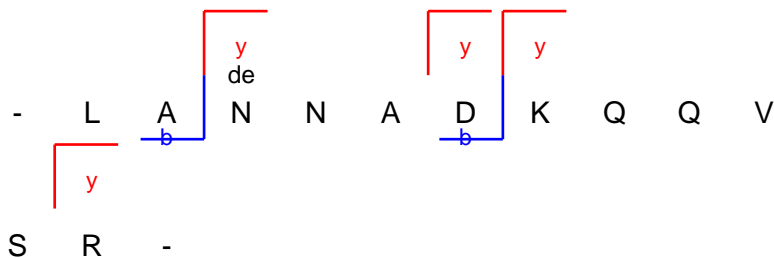

RO-QC-160121\_ZackD\_SS\_Set\_02\_Fraction 21442 FTMS; HC 62.3 516.98 FAM53C

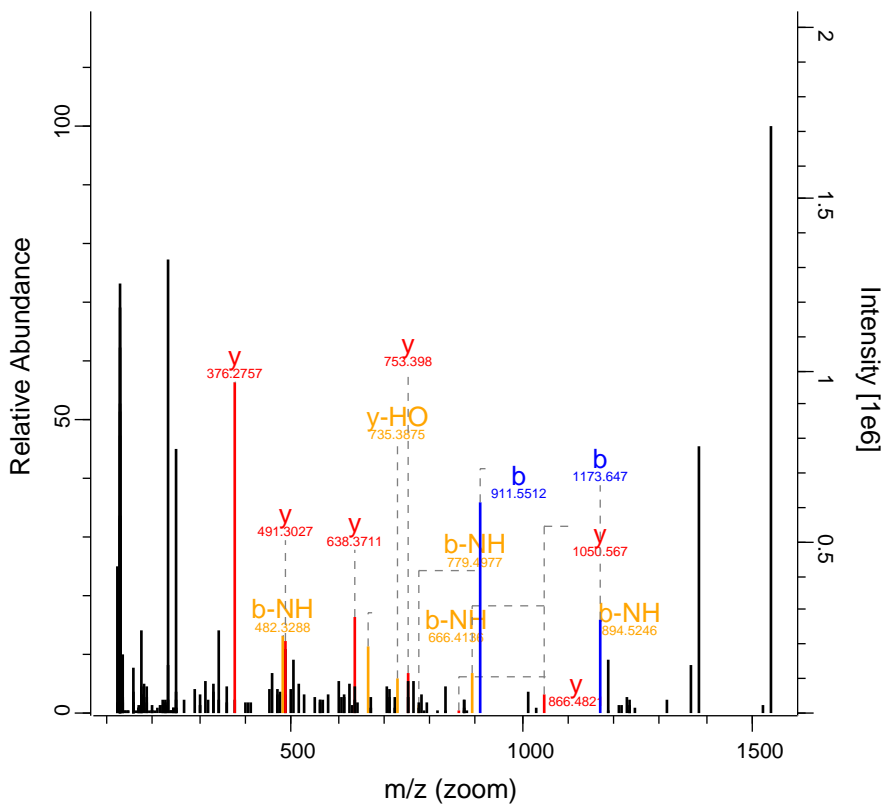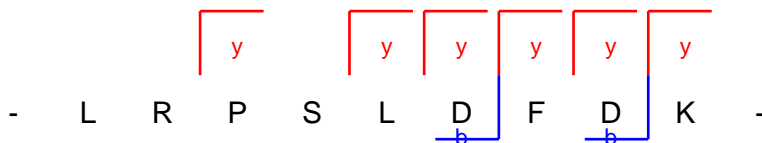

RO-QC-160121\_ZackD\_SS\_Set\_02\_Fraction 22462 FTMS; HC 43.08 498.79 FLG2

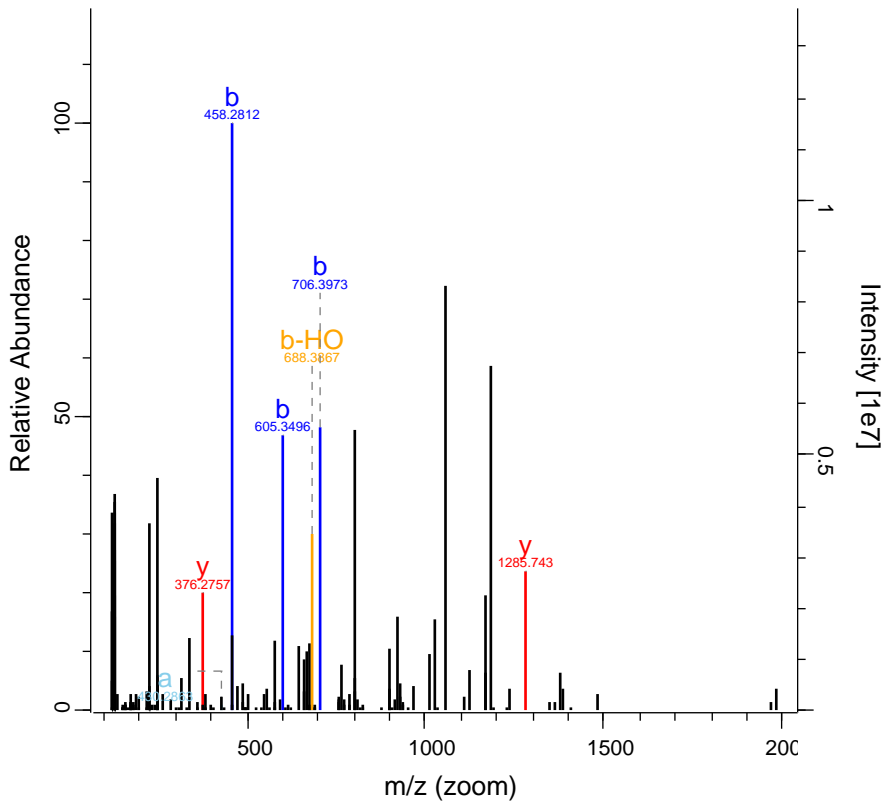

RO-QC-160121\_ZackD\_SS\_Set\_02\_Fractio 22598 FTMS; HC 102.53 751.41 EMC6

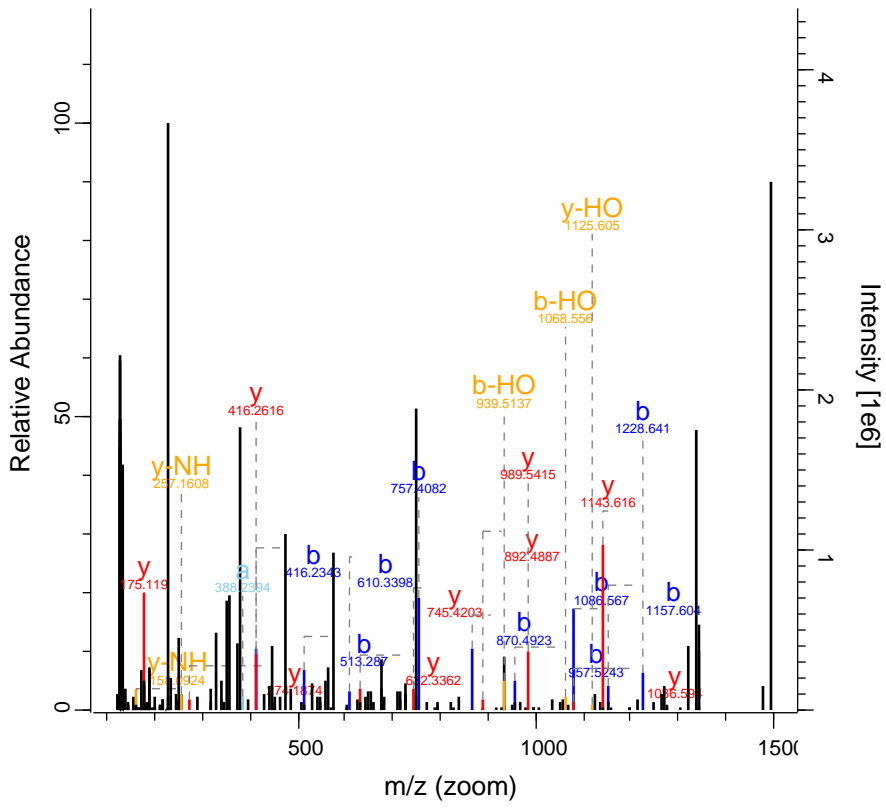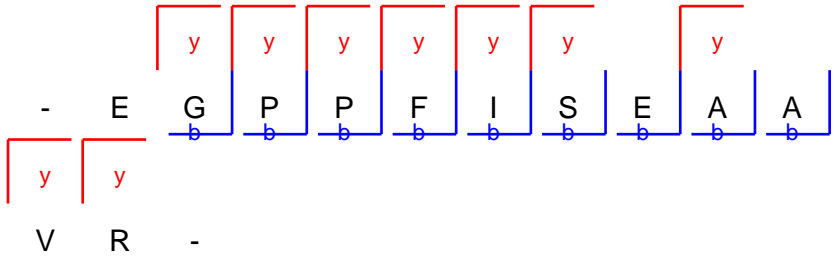

V R -



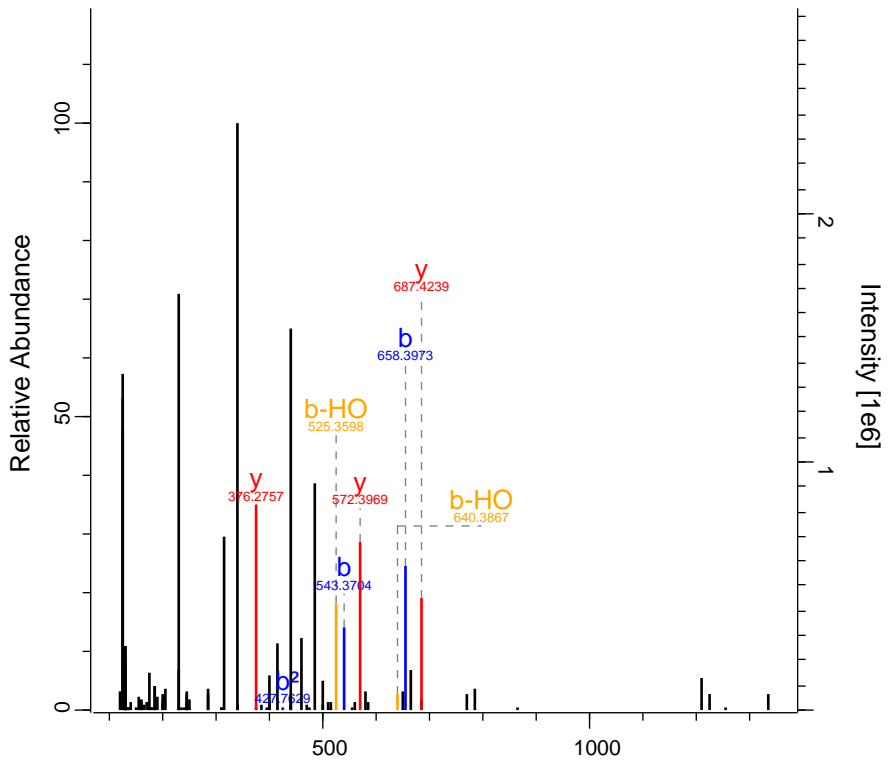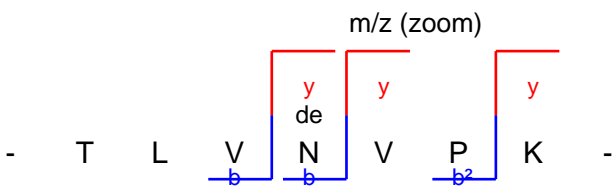

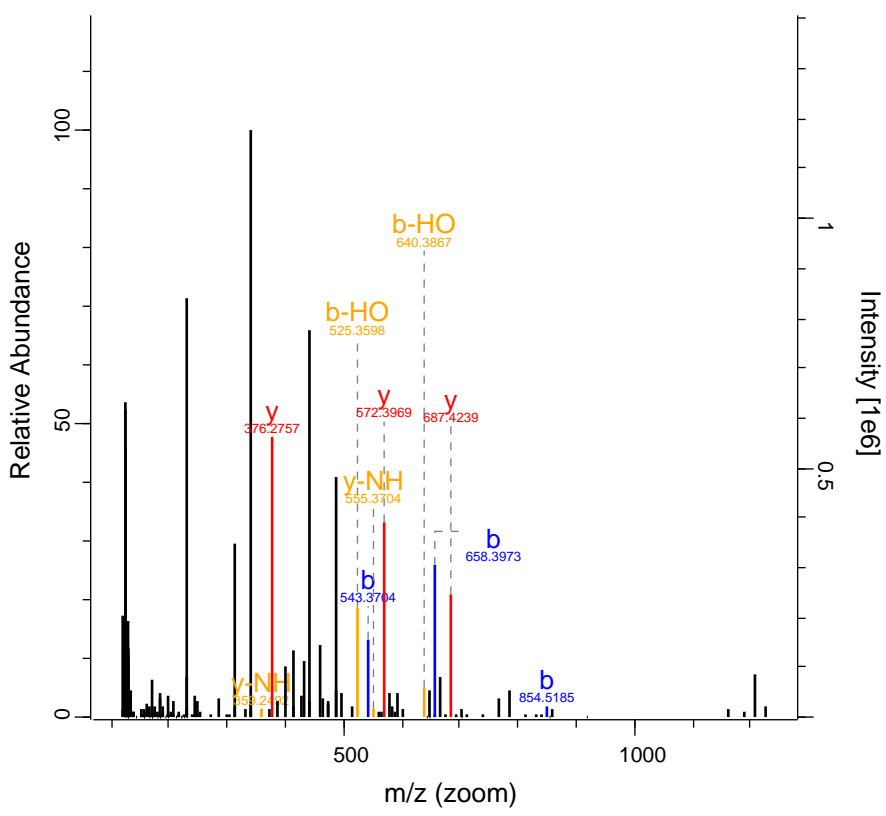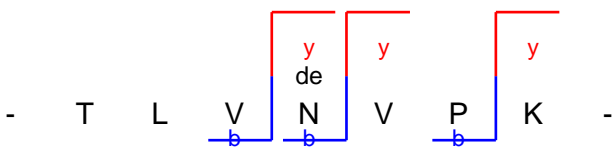

RO-QC-160121\_ZackD\_SS\_Set\_02\_Fractio 25282 FTMS; HC 141.39 649.89 EBP

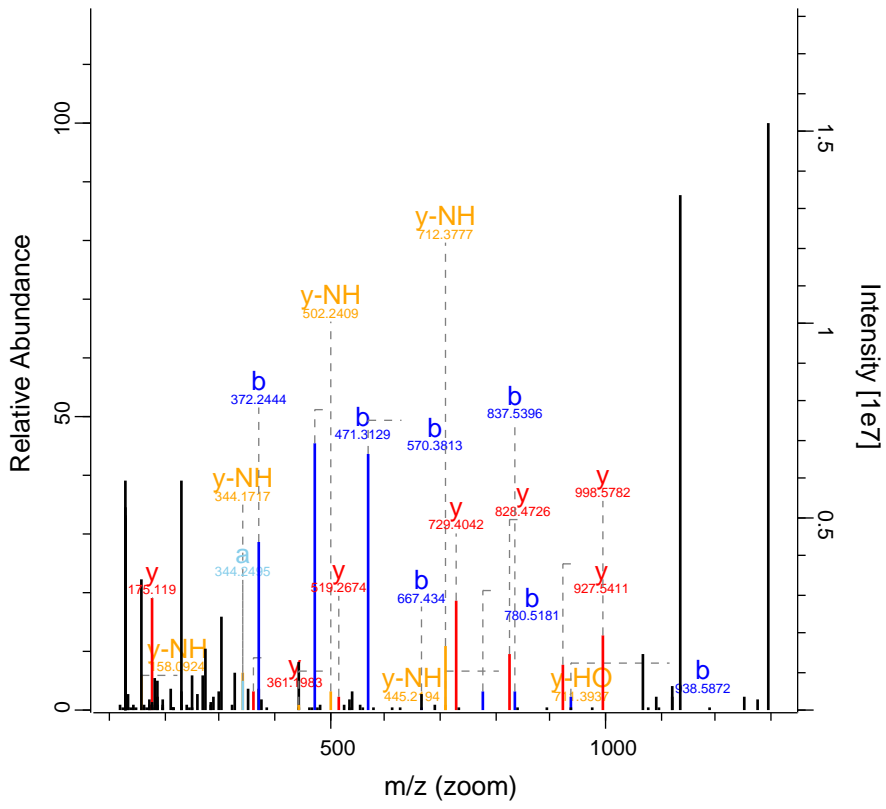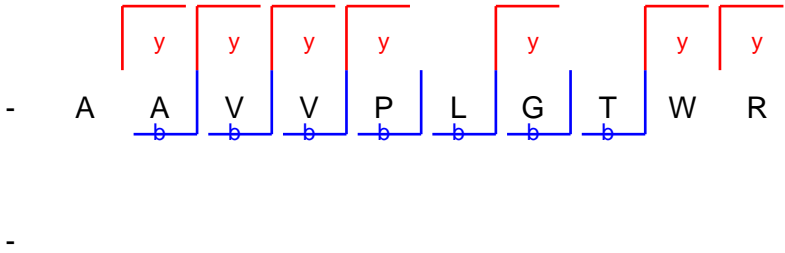

RO-QC-160121\_ZackD\_SS\_Set\_02\_Fractio 25470 FTMS; HC 103.55 984.04 NALCN

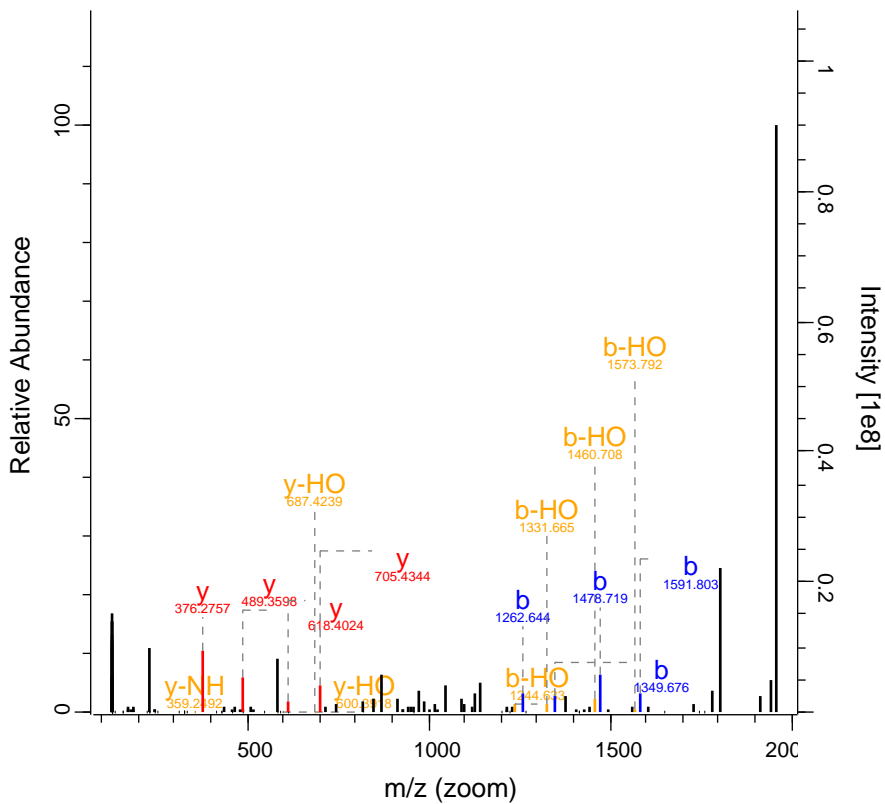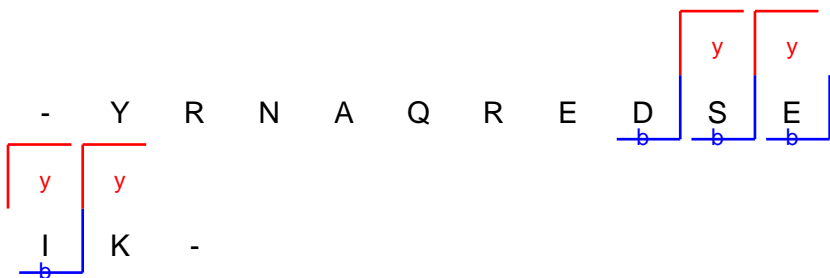

RO-QC-160121\_ZackD\_SS\_Set\_02\_Fractic 27556 FTMS; HC 96.82 1184.15 ATP6V0C

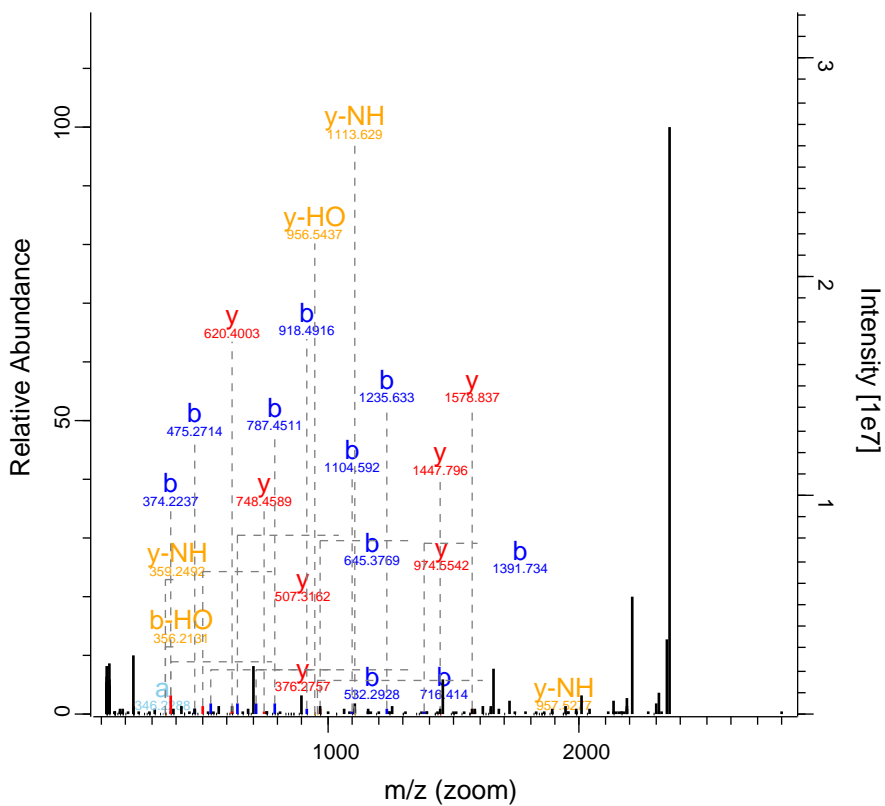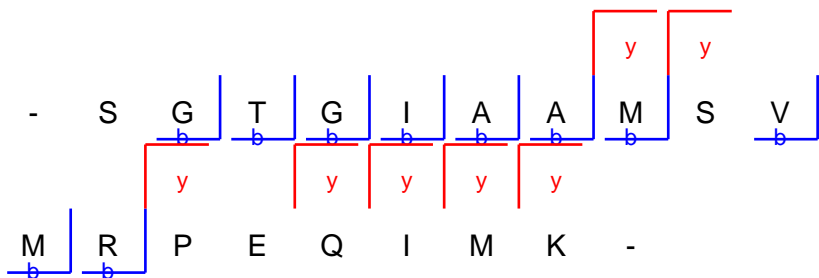

RO-QC-160121\_ZackD\_SS\_Set\_02\_Fraction 27561 FTMS; HC 49.99 592.33 ATP6V0C

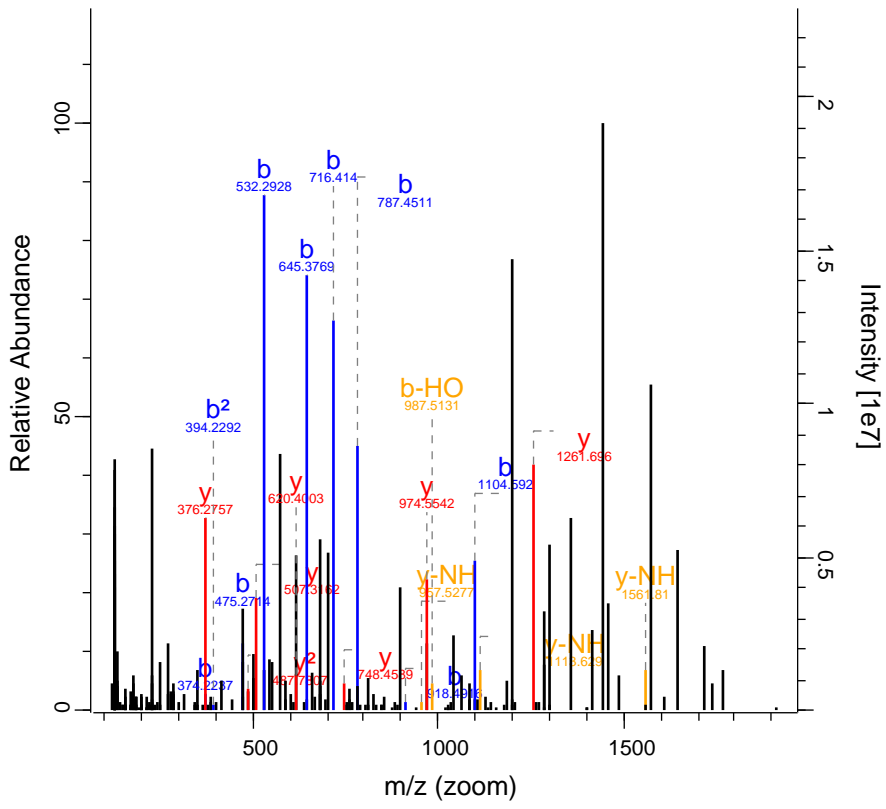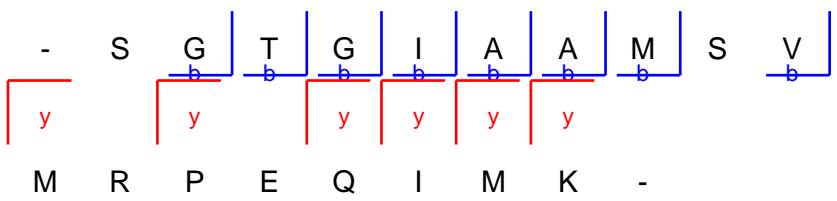

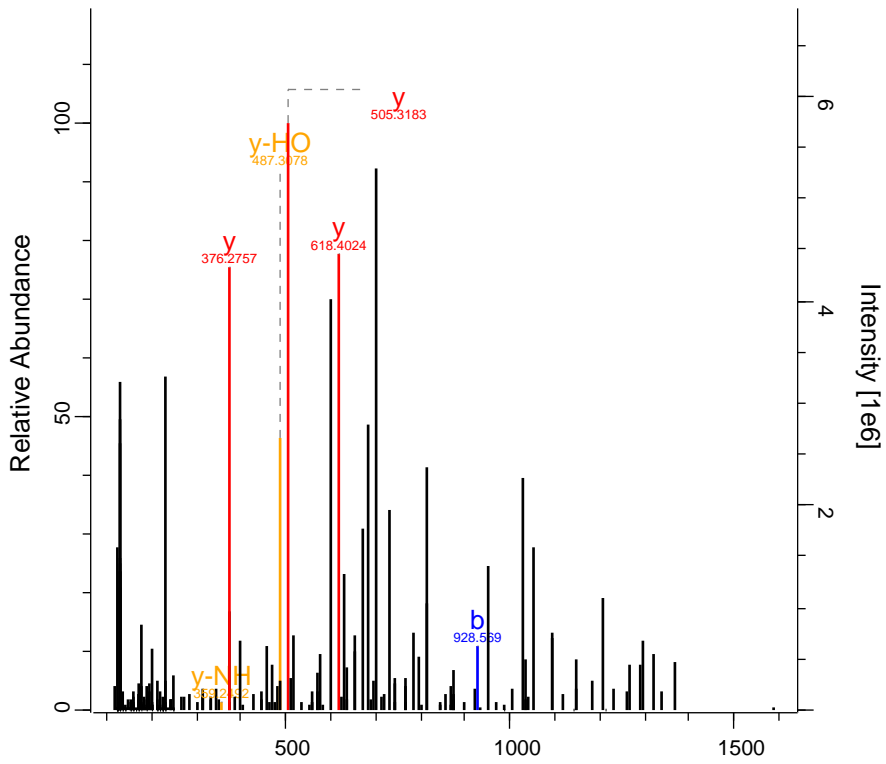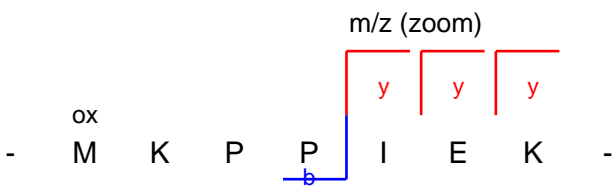





RO-QC-160121\_ZackD\_SS\_Set\_02\_Fraction 27815 FTMS; HC 32.19 592.58 ATP6V0C

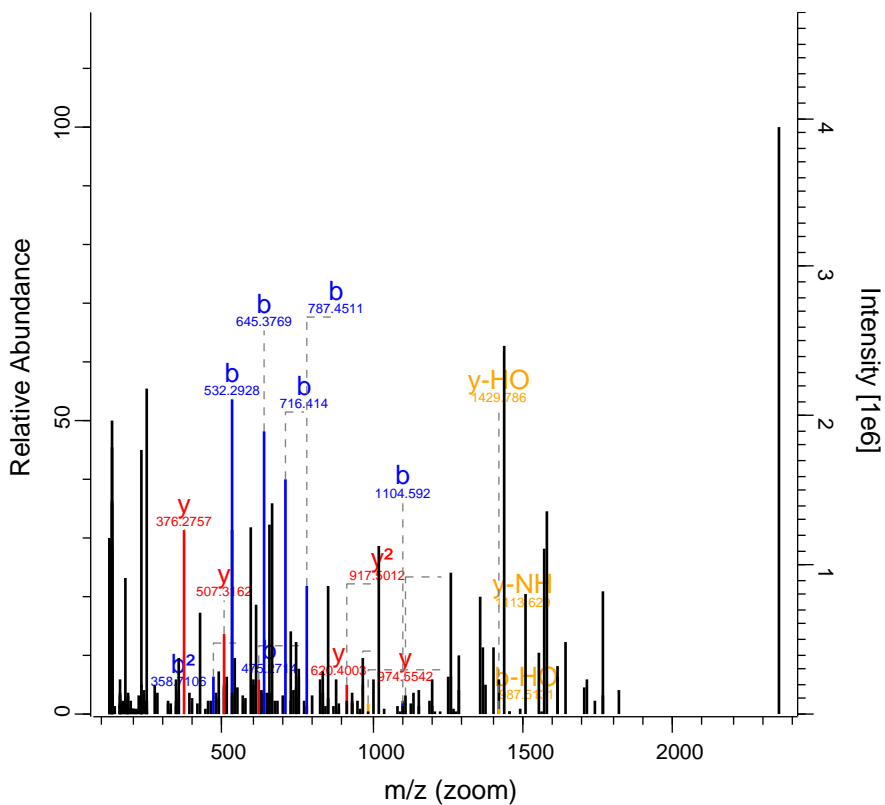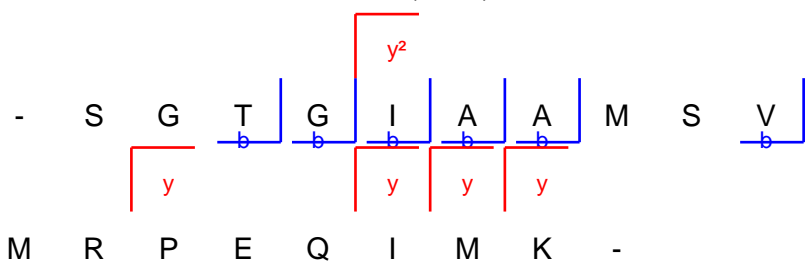

RO-QC-160121\_ZackD\_SS\_Set\_02\_Fractio 28133 FTMS; HC 200.14 1259.3 COX6A1

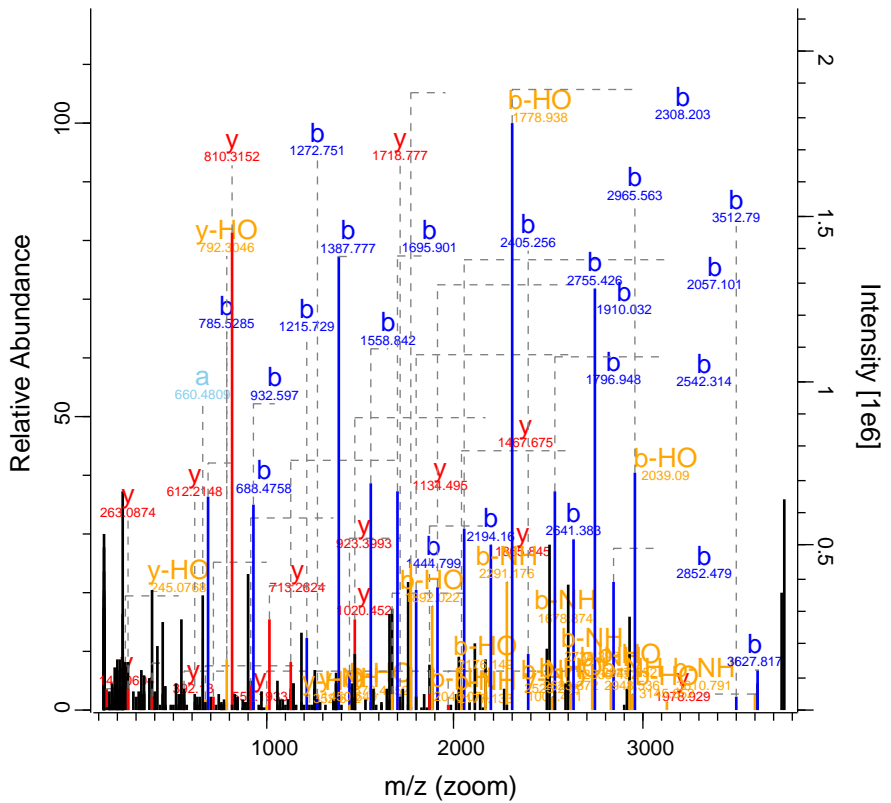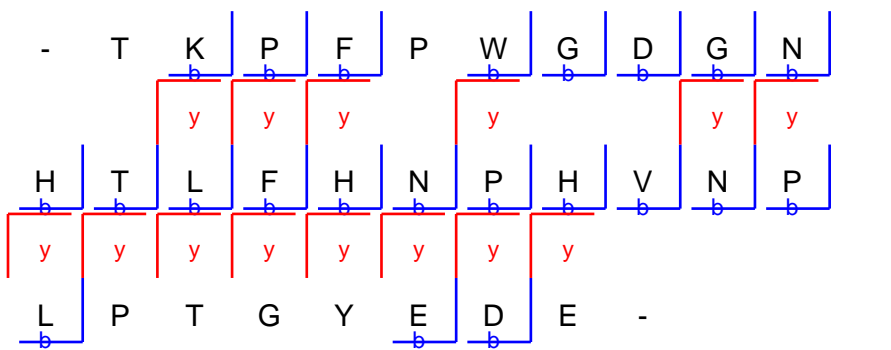

RO-QC-160121\_ZackD\_SS\_Set\_02\_Fraction 28176 FTMS; HC 93.88 756.18 COX6A1

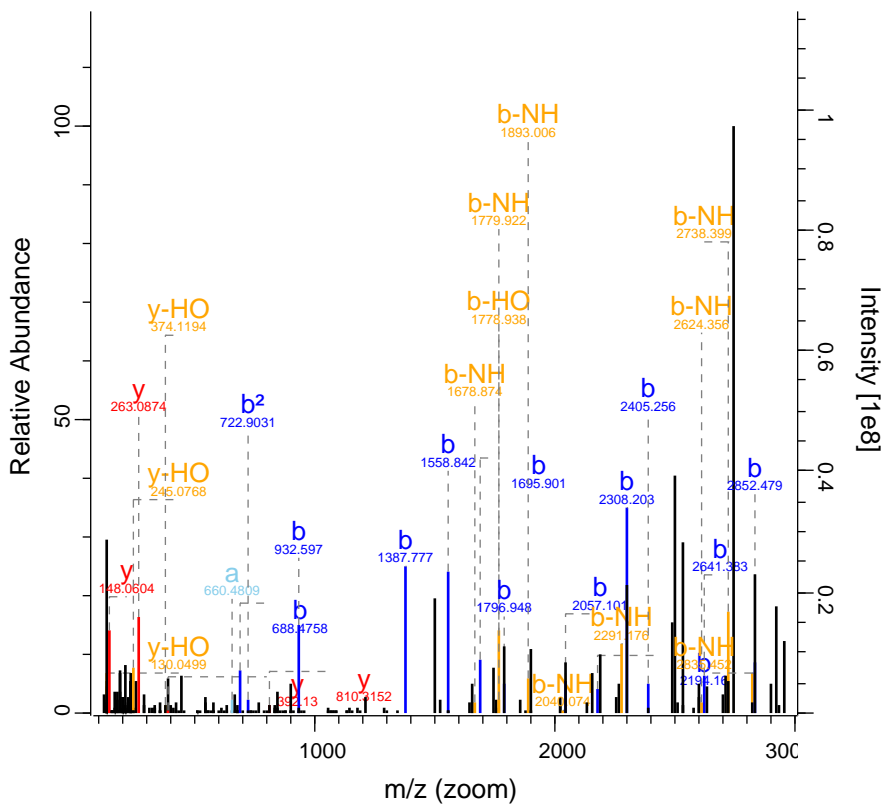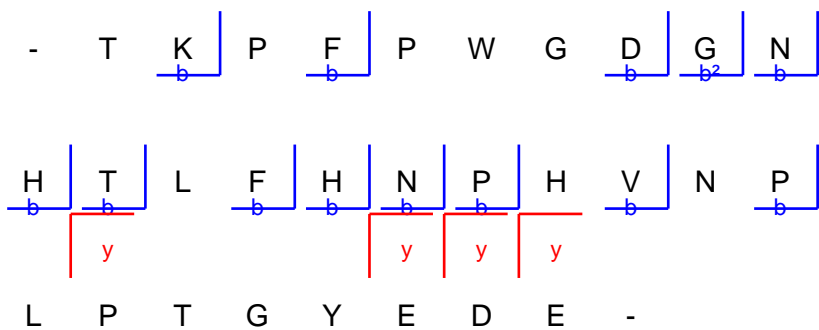

RO-QC-160121\_ZackD\_SS\_Set\_02\_Fractic 28332 FTMS; HC 77.12 1001.53 DUSP6

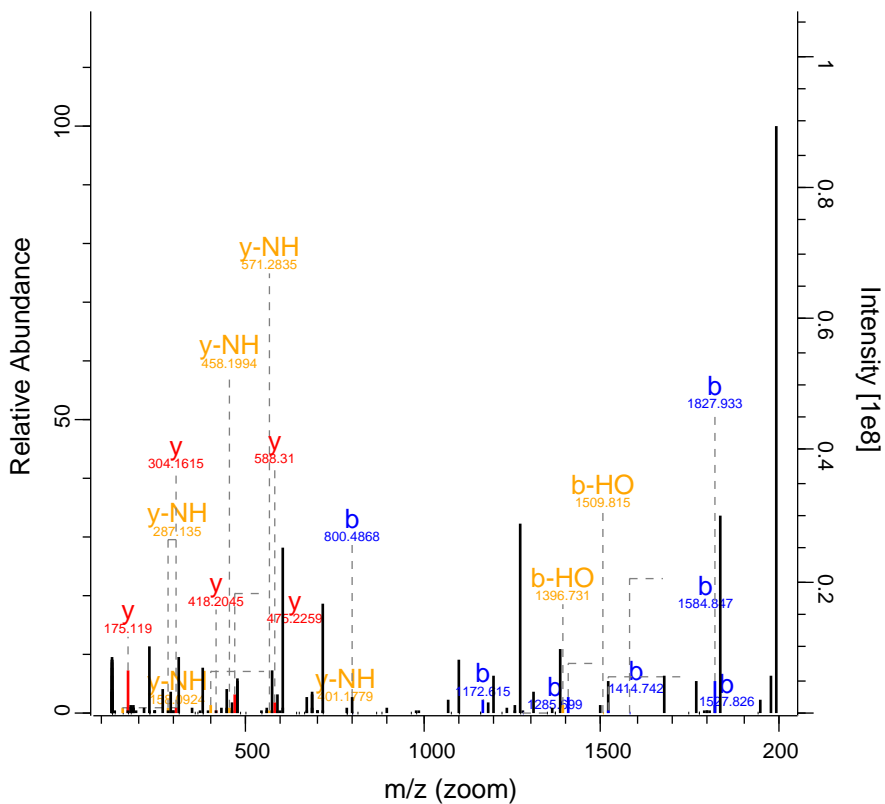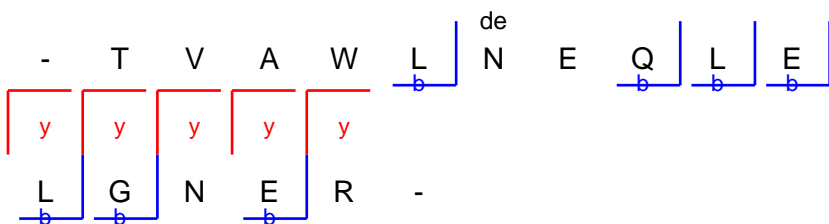

RO-QC-160121\_ZackD\_SS\_Set\_02\_Fraction 30203 FTMS; HC 45.61 899.13 CEMIP

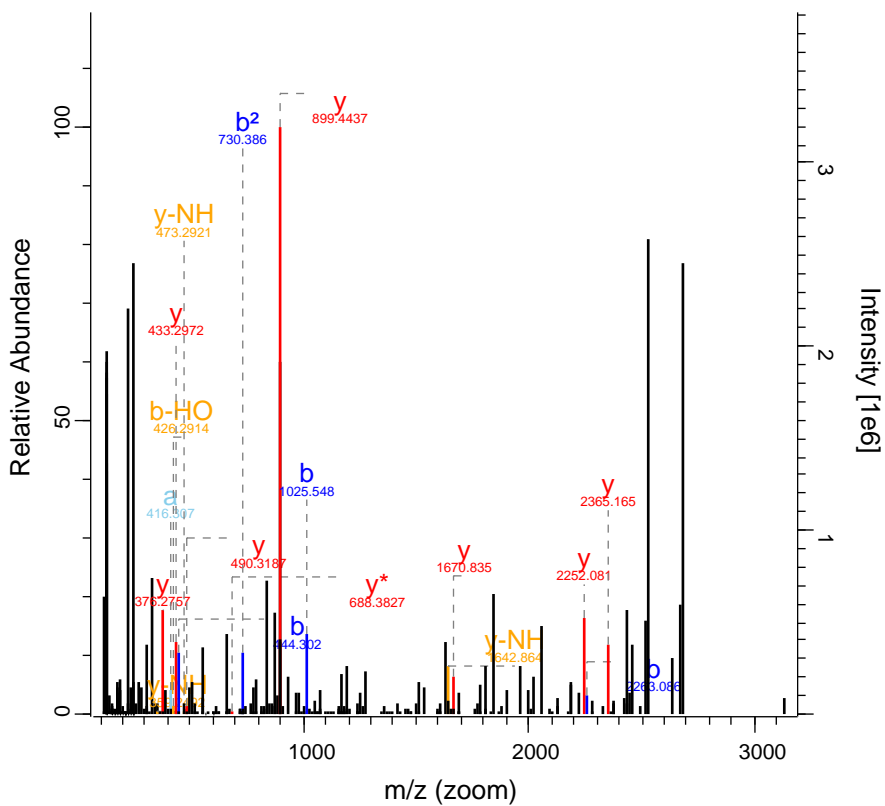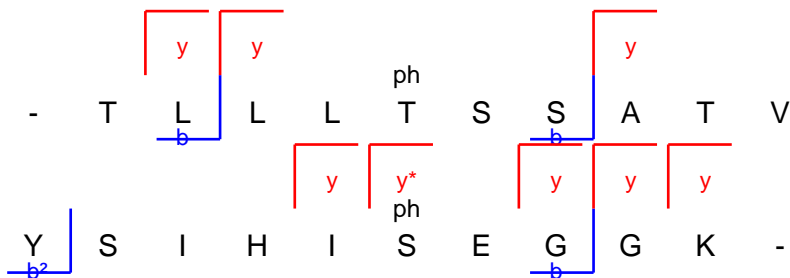

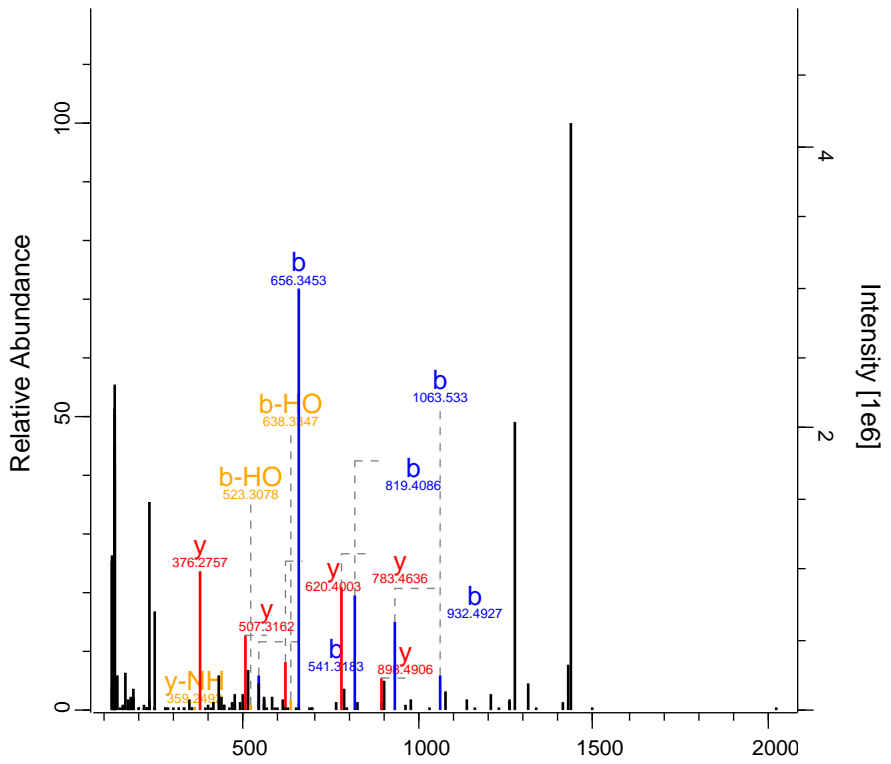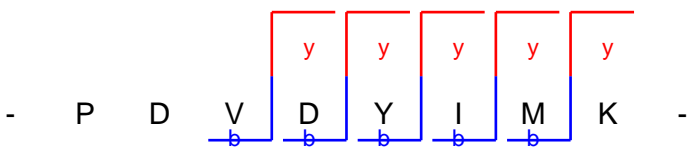



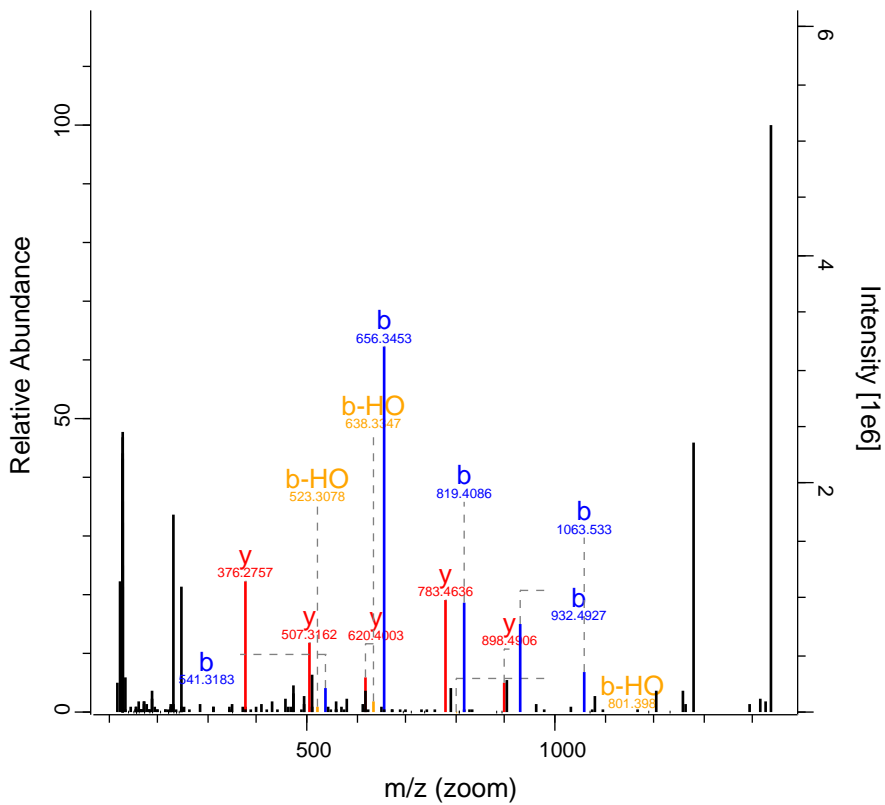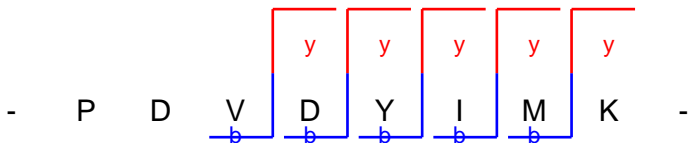



| Raw File                                | Scan  | Method    | Score | m/z   |
|-----------------------------------------|-------|-----------|-------|-------|
| RO-QC-160121_ZackD_SS_Set_02_Fraction_9 | 31532 | FTMS; HCD | 99.65 | 815.5 |

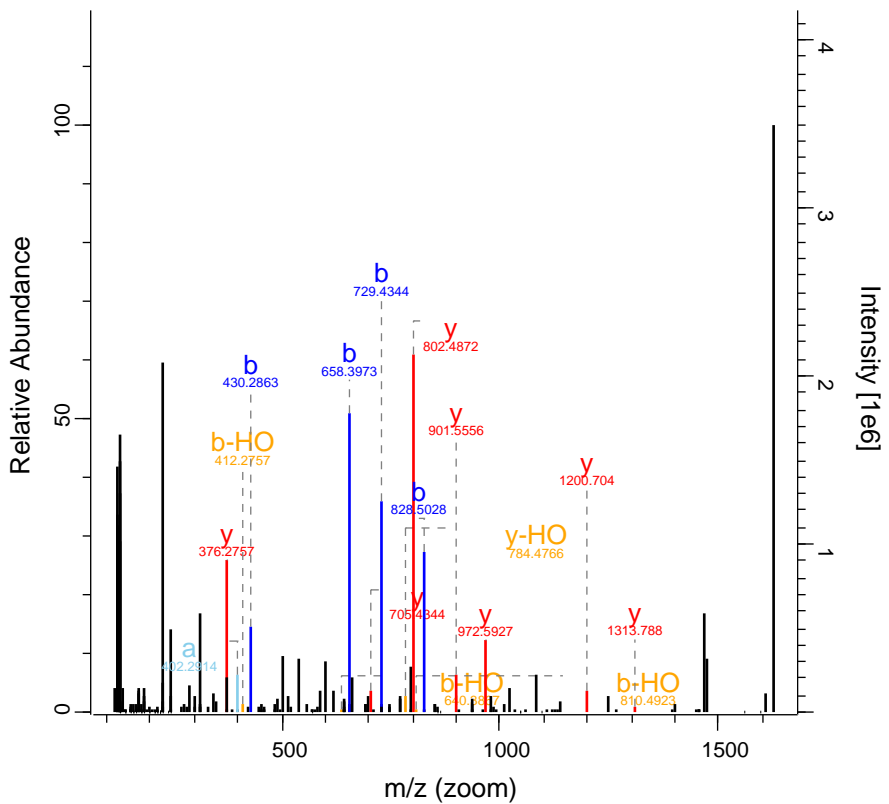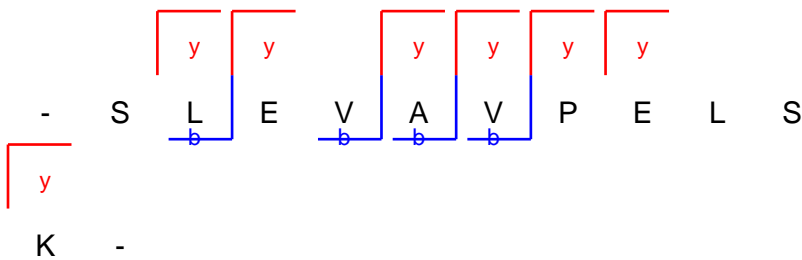

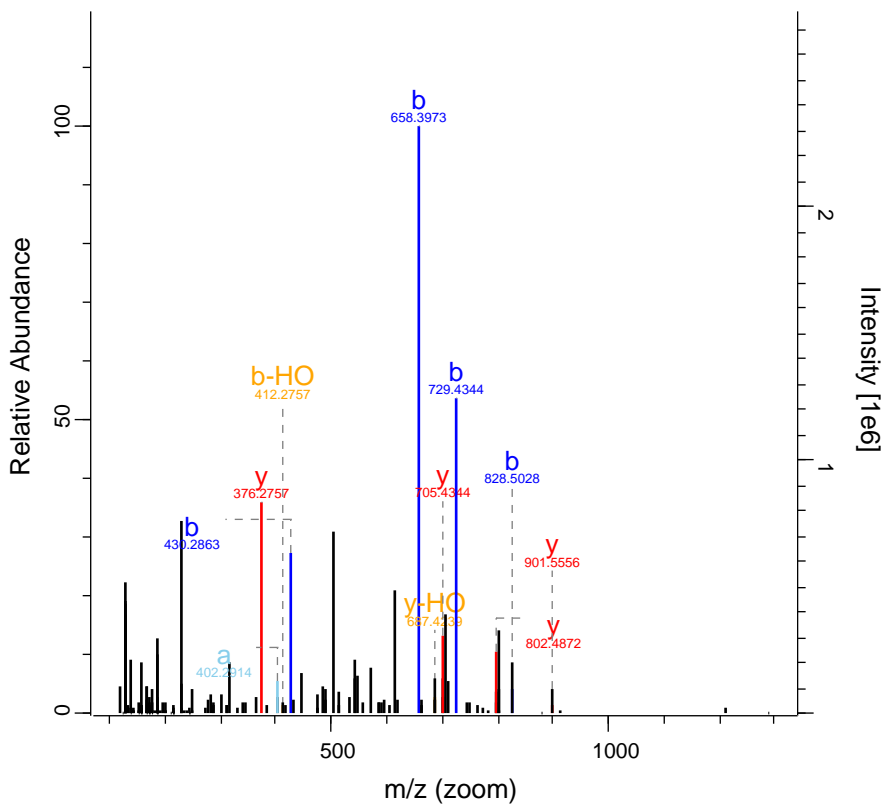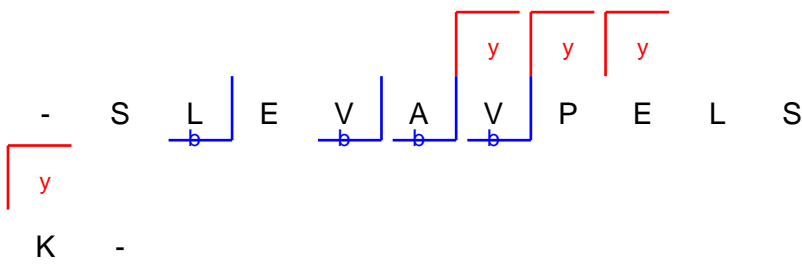

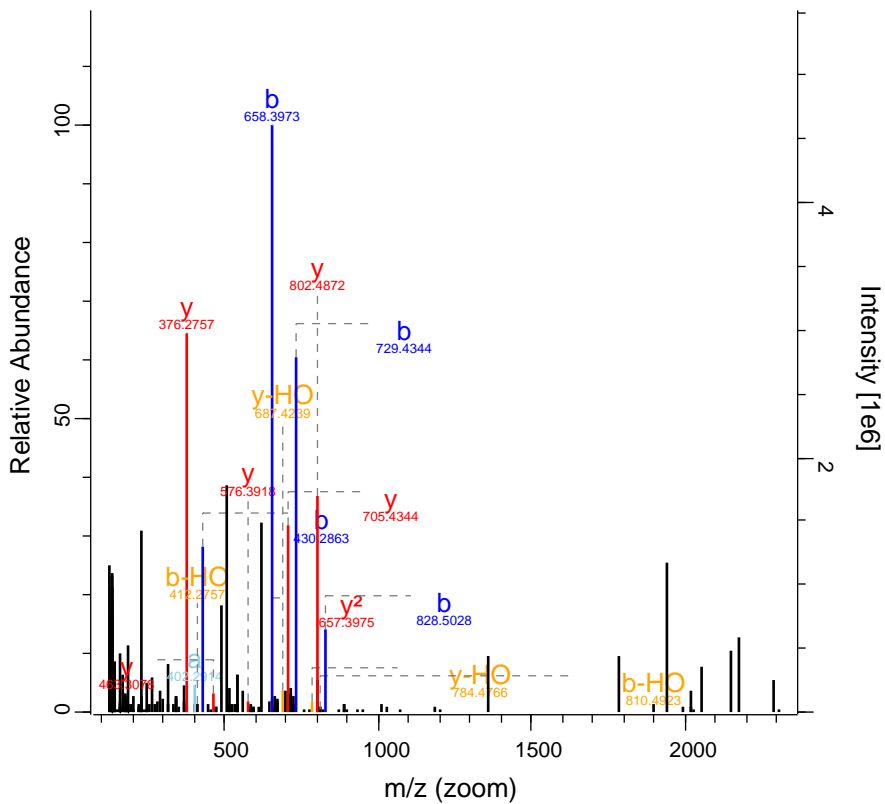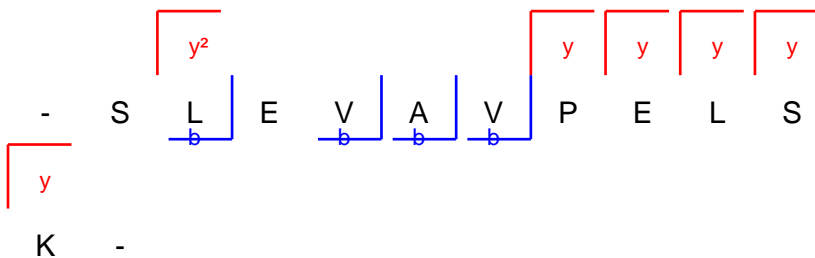

RO-QC-160121\_ZackD\_SS\_Set\_02\_Fraction 32475 FTMS; HCl45.7 821.2 MMP1

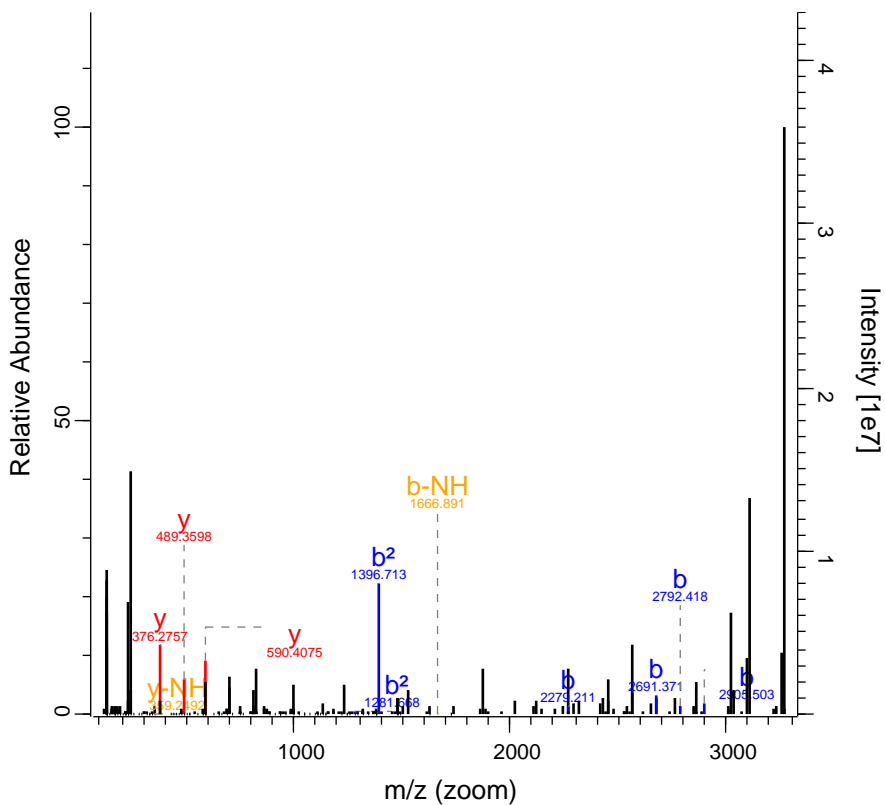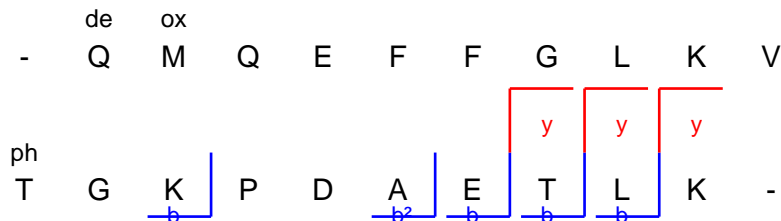



RO-QC-160121\_ZackD\_SS\_Set\_02\_Fractio 32699 FTMS; HC 140.28 836.42 CNIH4

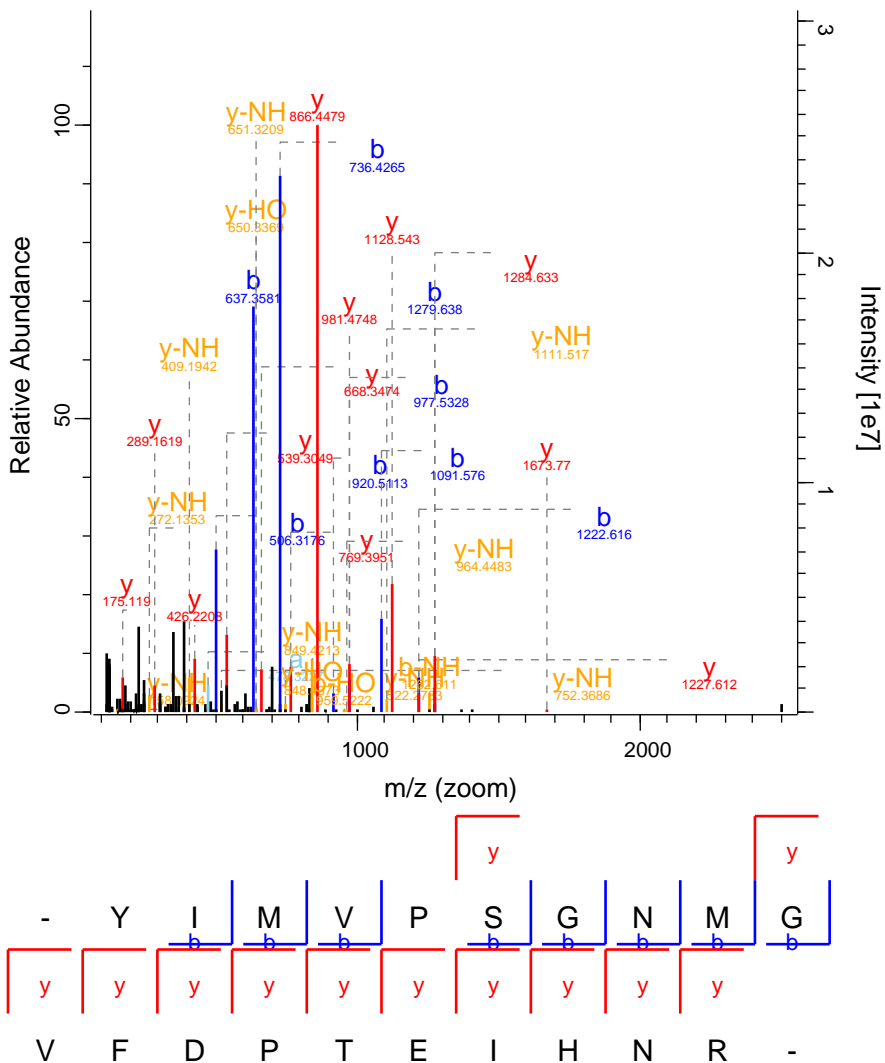

RO-QC-160121\_ZackD\_SS\_Set\_02\_Fraction 33488 FTMS; HCl 114.39 673.9 C19orf12

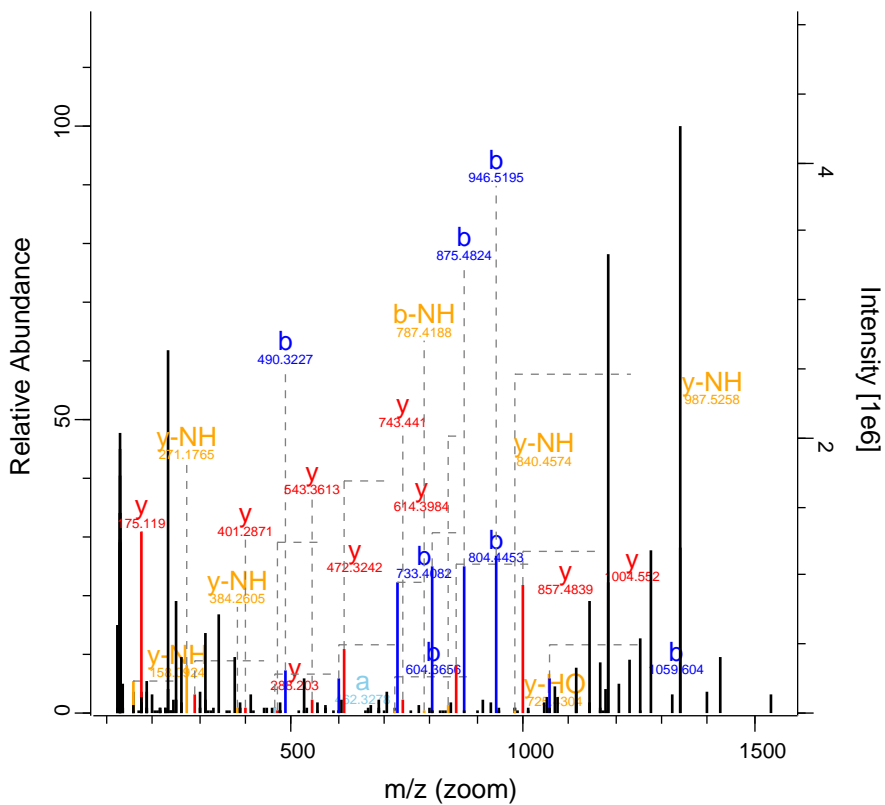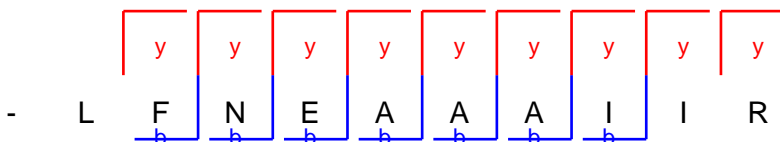

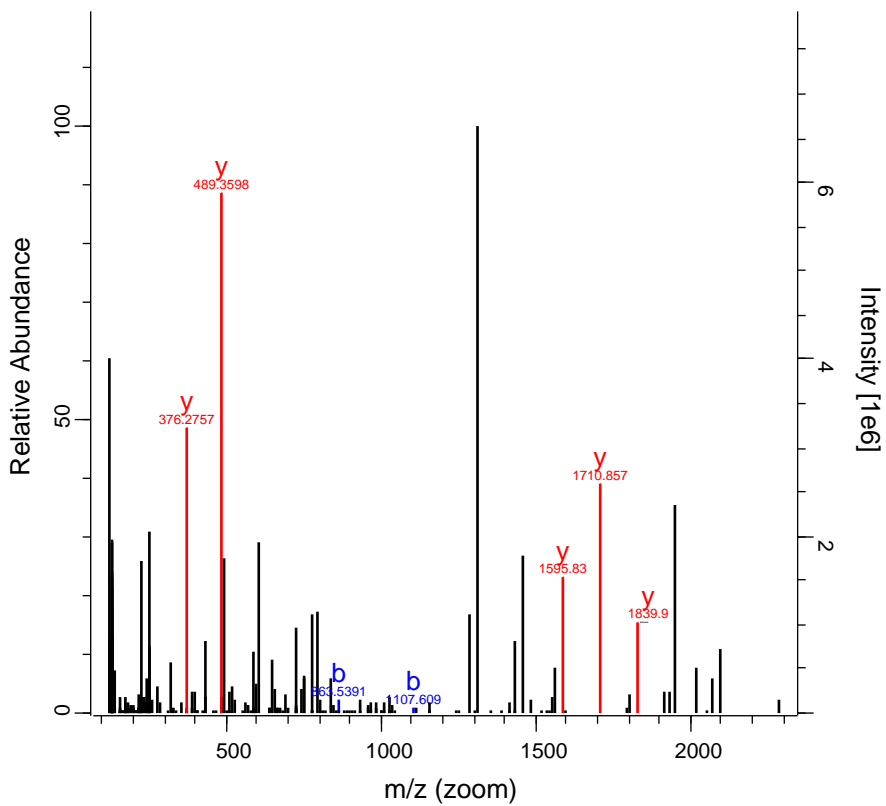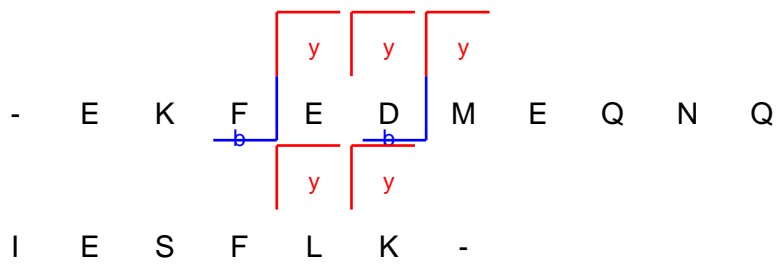





RO-QC-160121\_ZackD\_SS\_Set\_02\_Fractic 37127 FTMS; HC 67.11 1081.62 C6

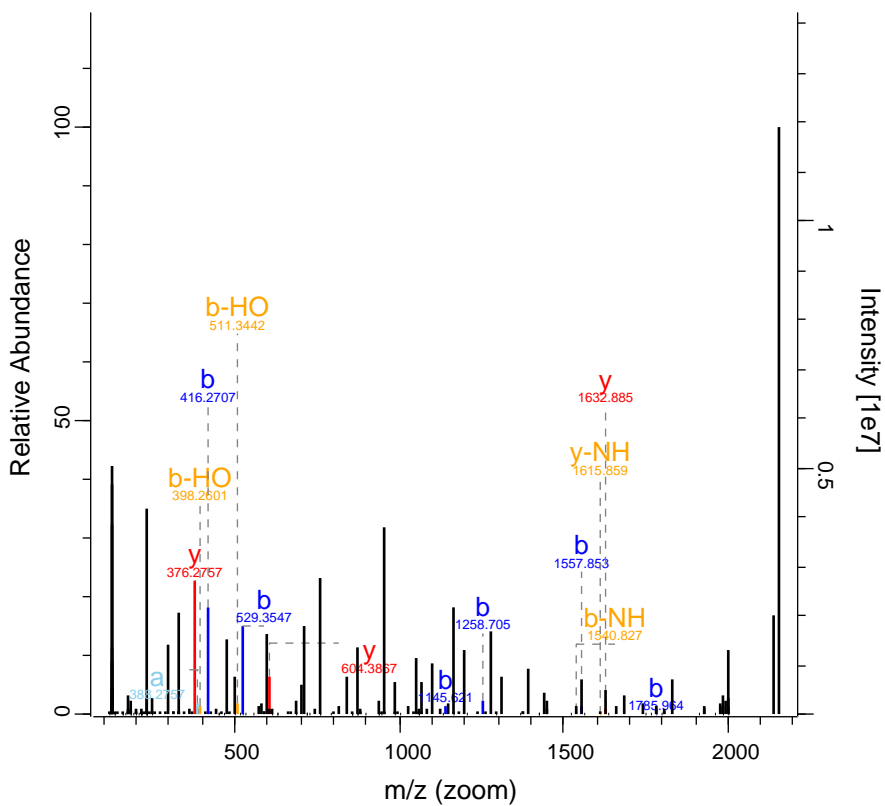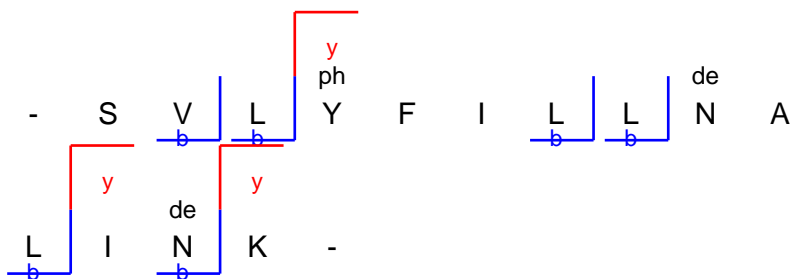

RO-QC-160121\_ZackD\_SS\_Set\_02\_Fractic 37470 FTMS; HC 111.82 1028.59 ZKSCAN2

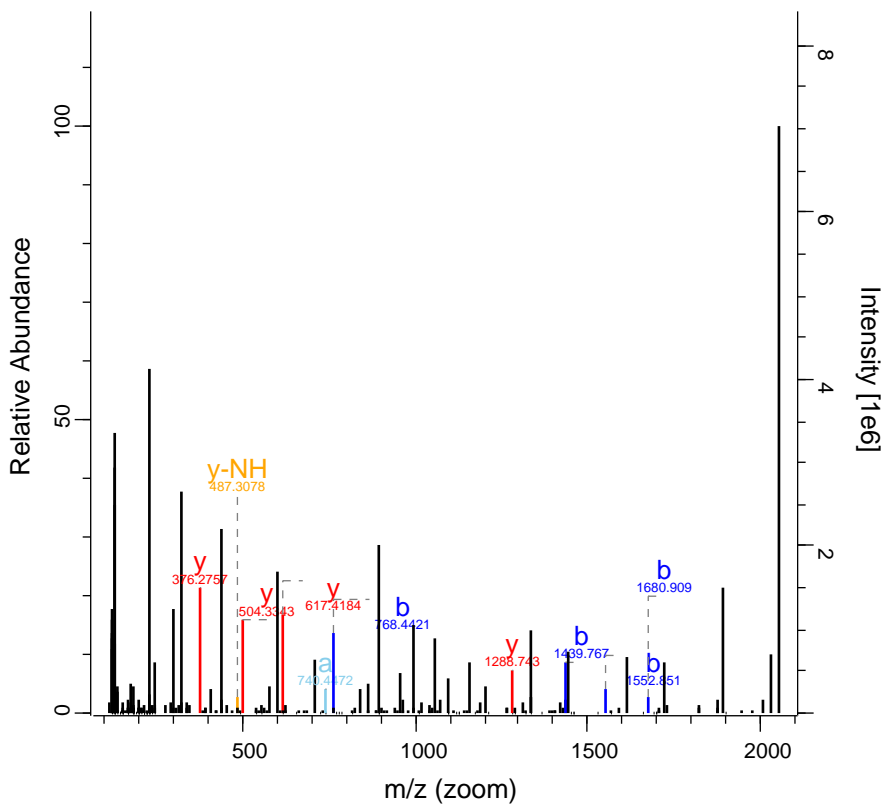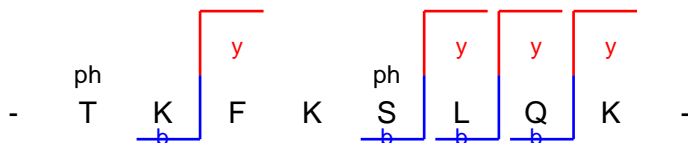

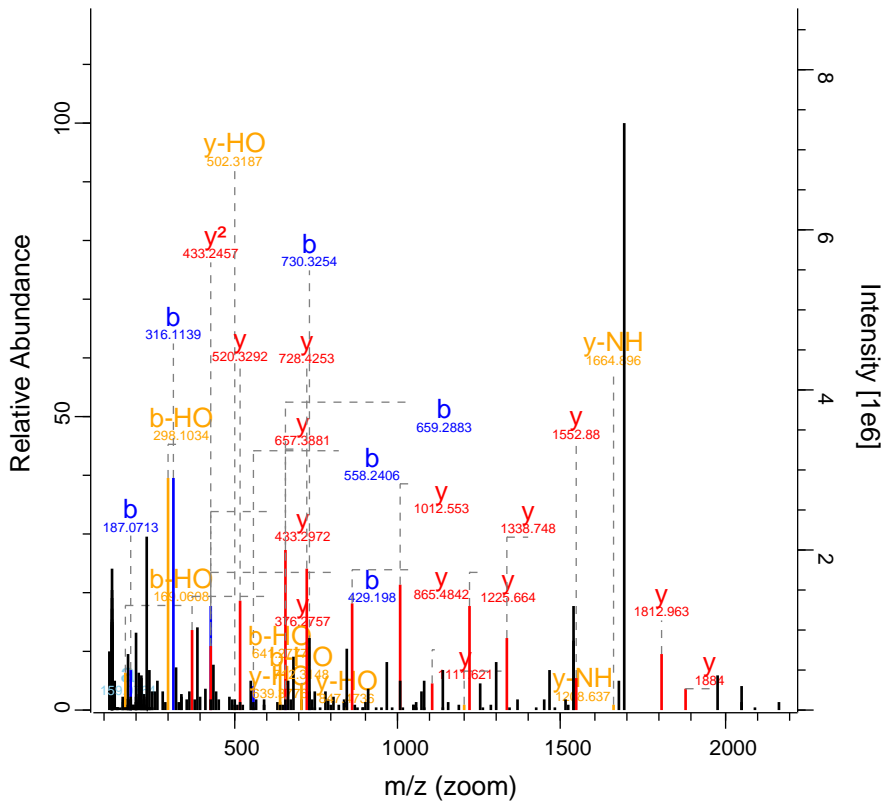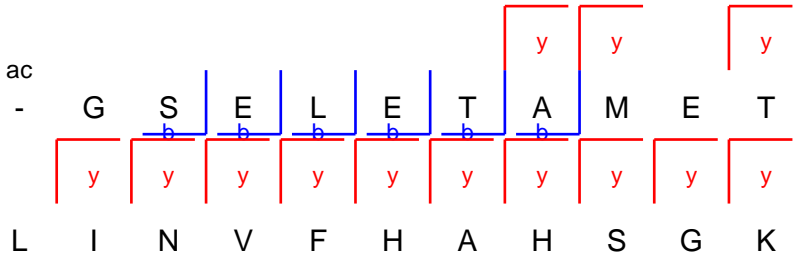



RO-QC-160121\_ZackD\_SS\_Set\_02\_Fractic 40547 FTMS; HC 139.78 1149.13 NPW

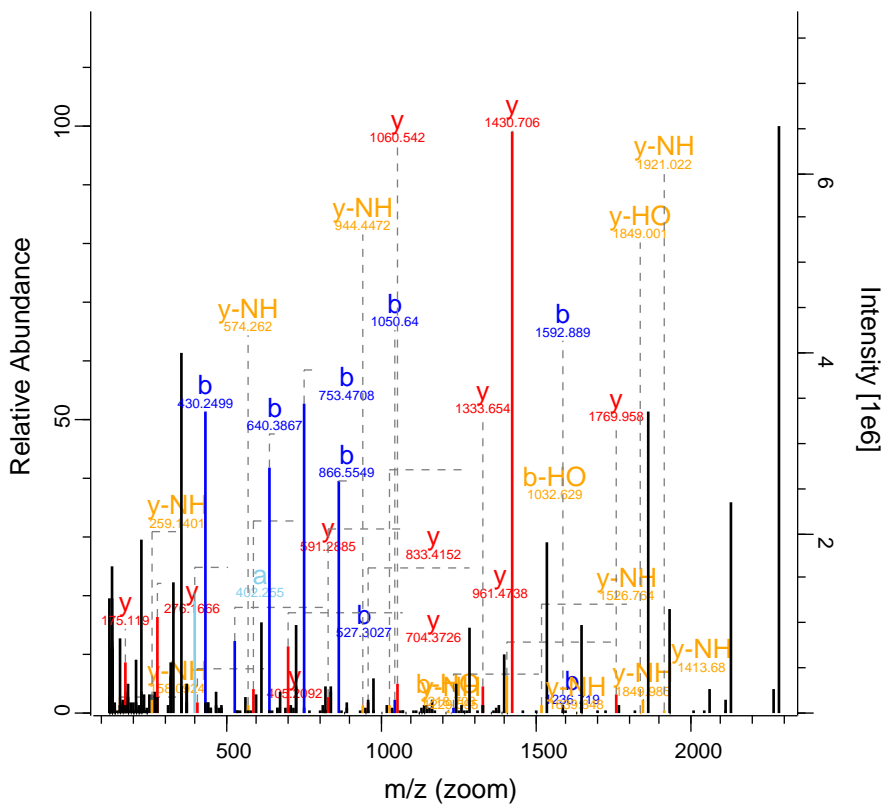

RO-QC-160121\_ZackD\_SS\_Set\_02\_Fraction 4678 FTMS; HC 53.68 776.86 USP42

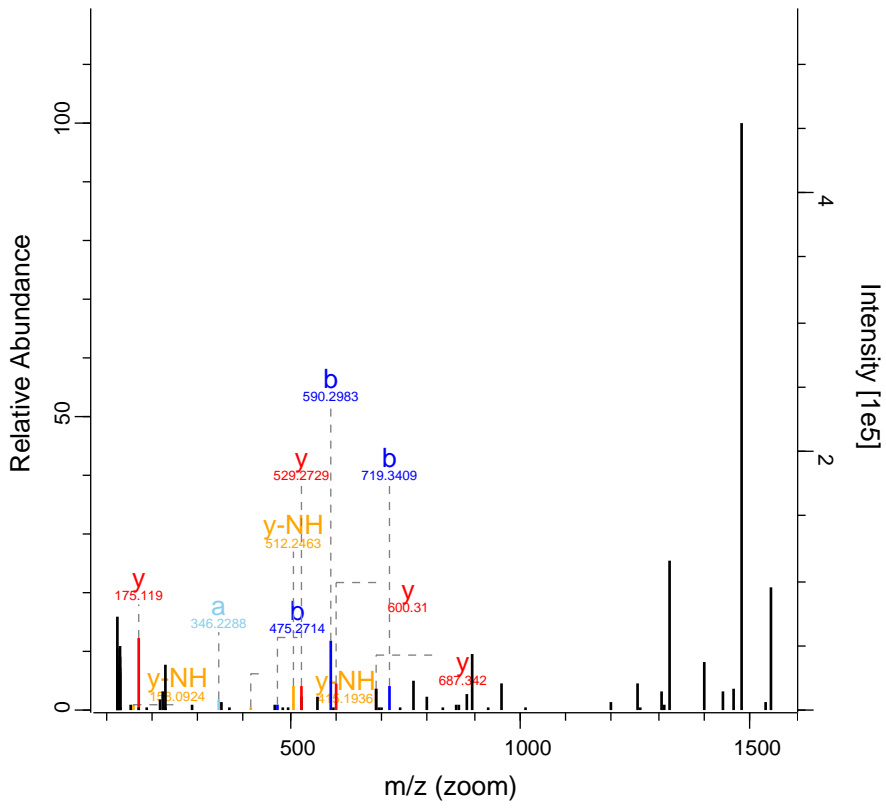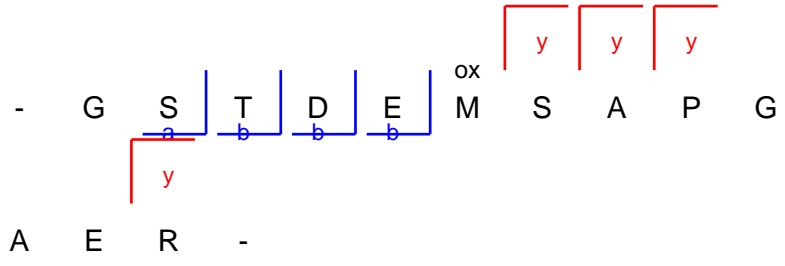

RO-QC-160121\_ZackD\_SS\_Set\_02\_Fraction 4834 FTMS; HC 71.22 480.27 C10orf12

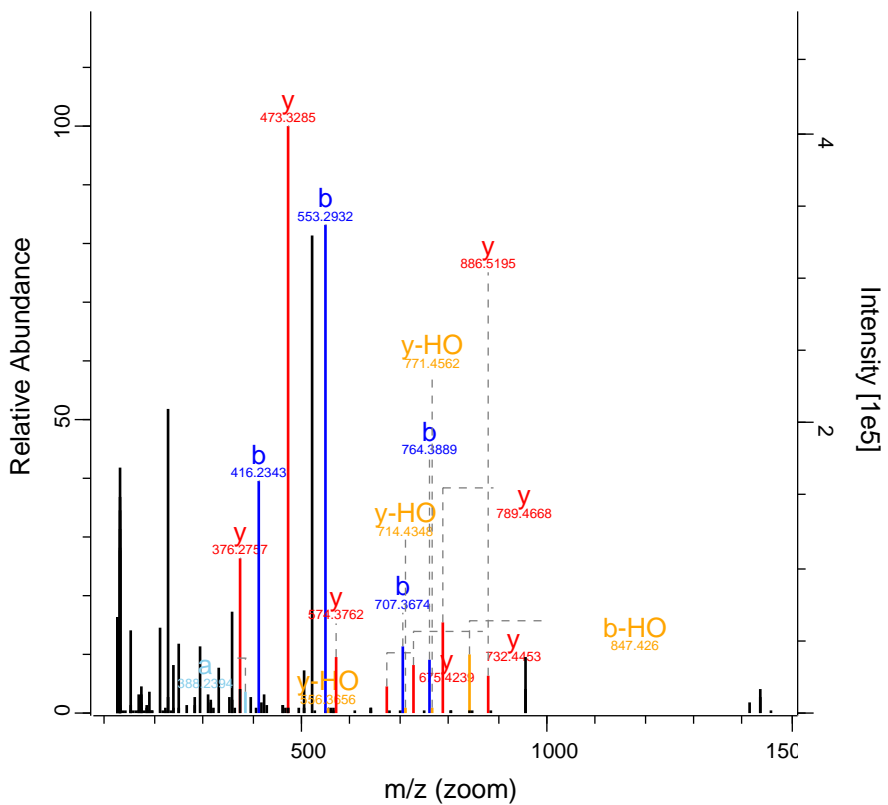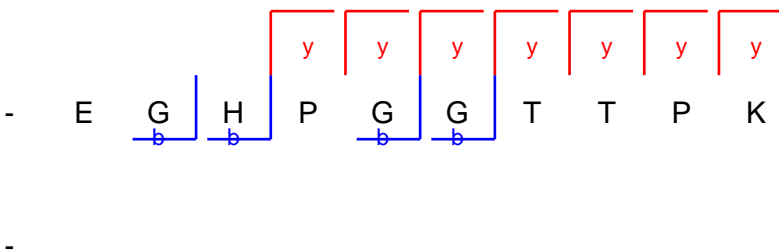



RO-QC-160121\_ZackD\_SS\_Set\_02\_Fraction 5056 FTMS; HC 91.86 578.28 EPC2

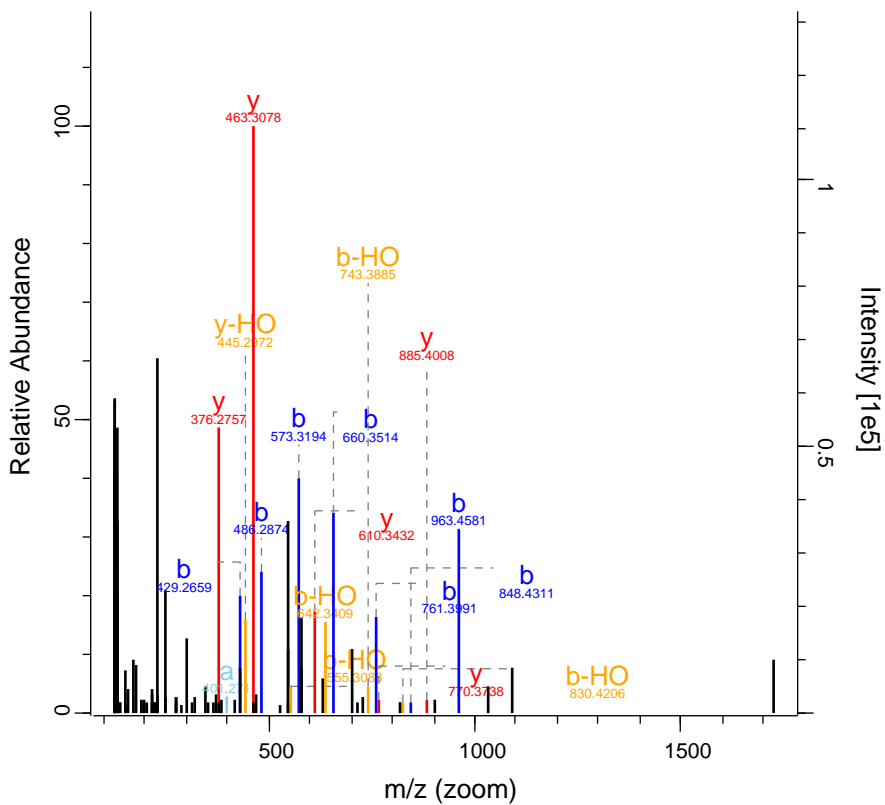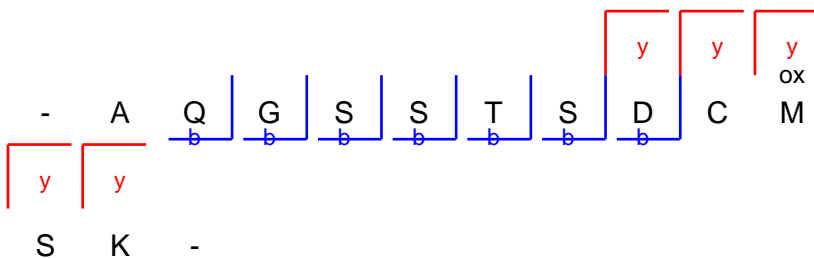

RO-QC-160121\_ZackD\_SS\_Set\_02\_Fraction 5104 FTMS; HC 87.18 486.58 CEP68

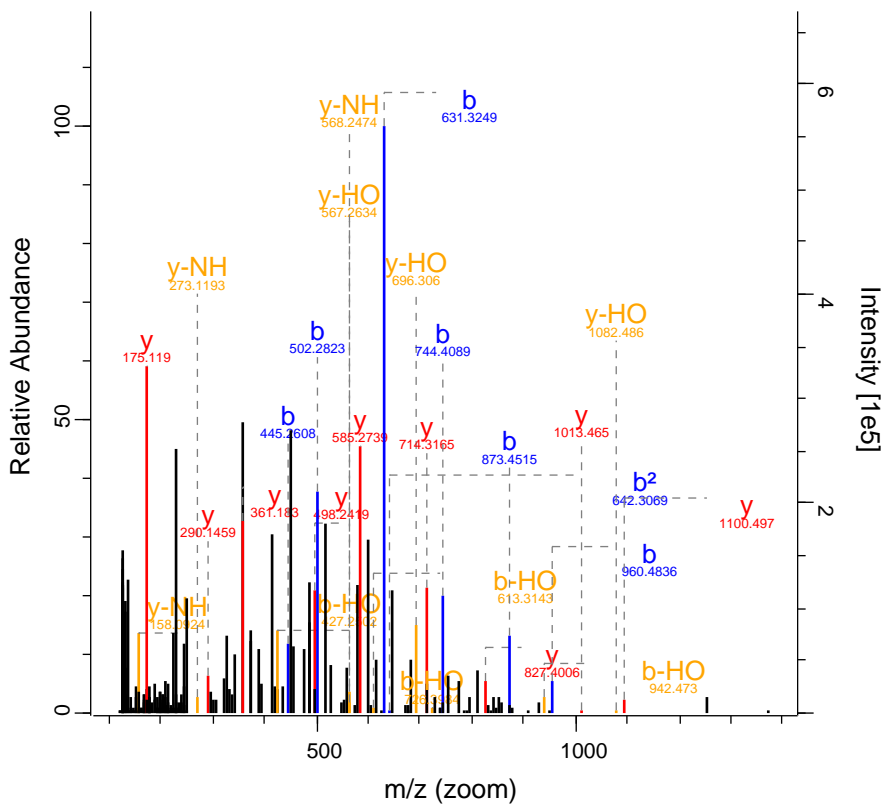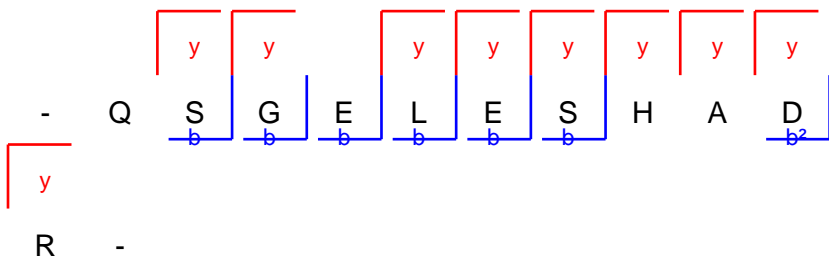

RO-QC-160121\_ZackD\_SS\_Set\_02\_Fraction 5287 FTMS; HC 131.42 494.92 TMC06

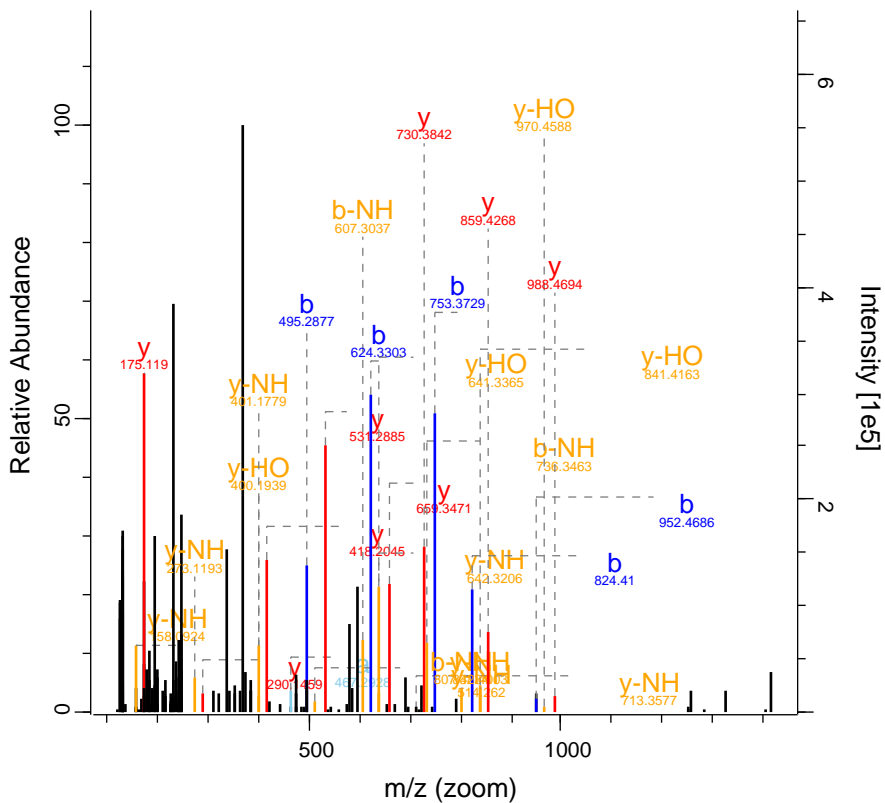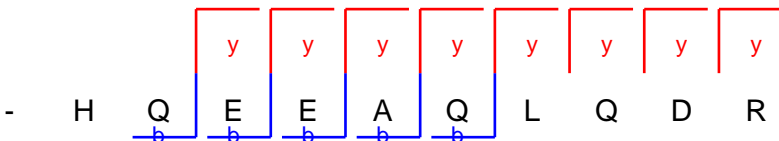

RO-QC-160121\_ZackD\_SS\_Set\_02\_Fraction 5360 FTMS; HC 77.66 741.88 TMC06

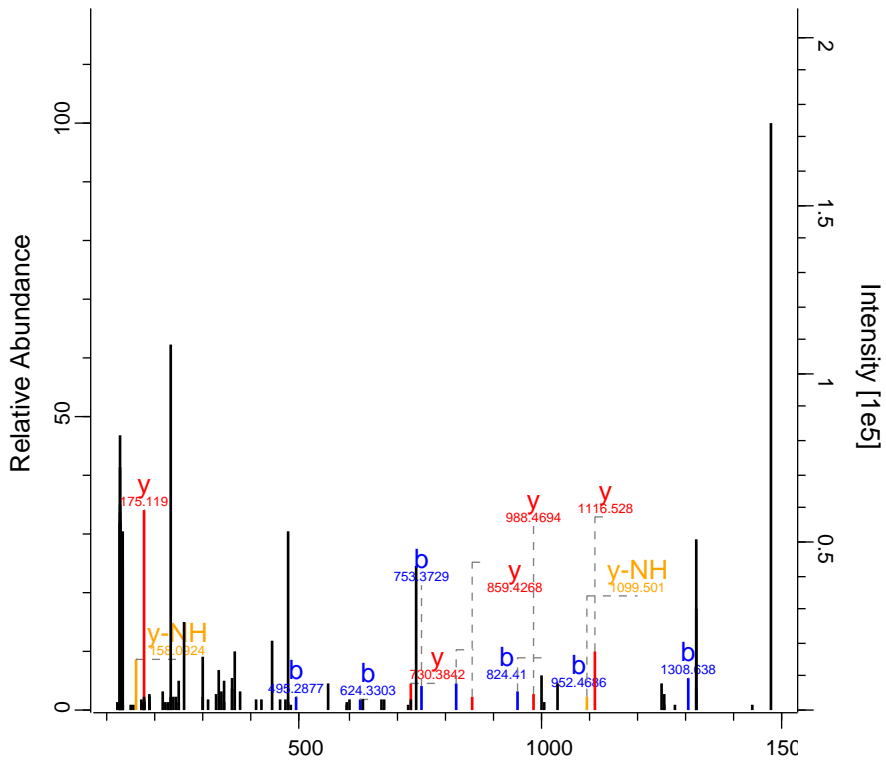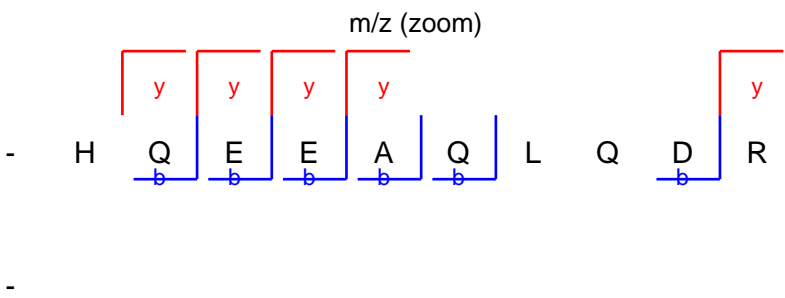

RO-QC-160121\_ZackD\_SS\_Set\_02\_Fraction 5569 FTMS; HC 130.98 629.81 RUSC2

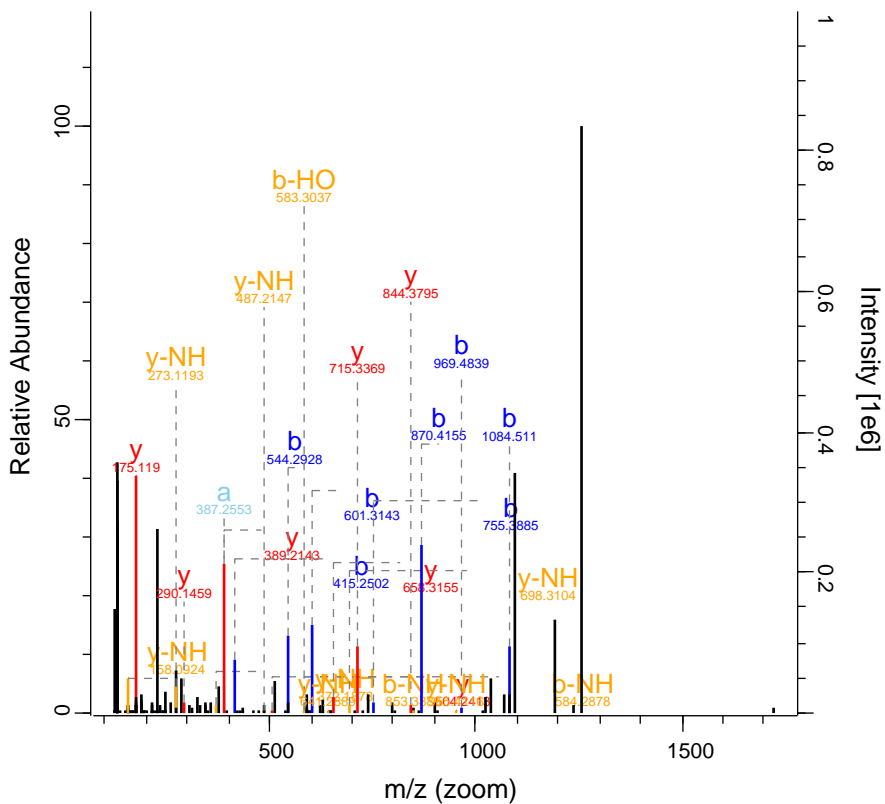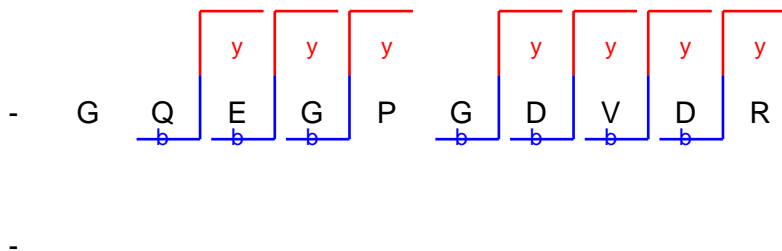

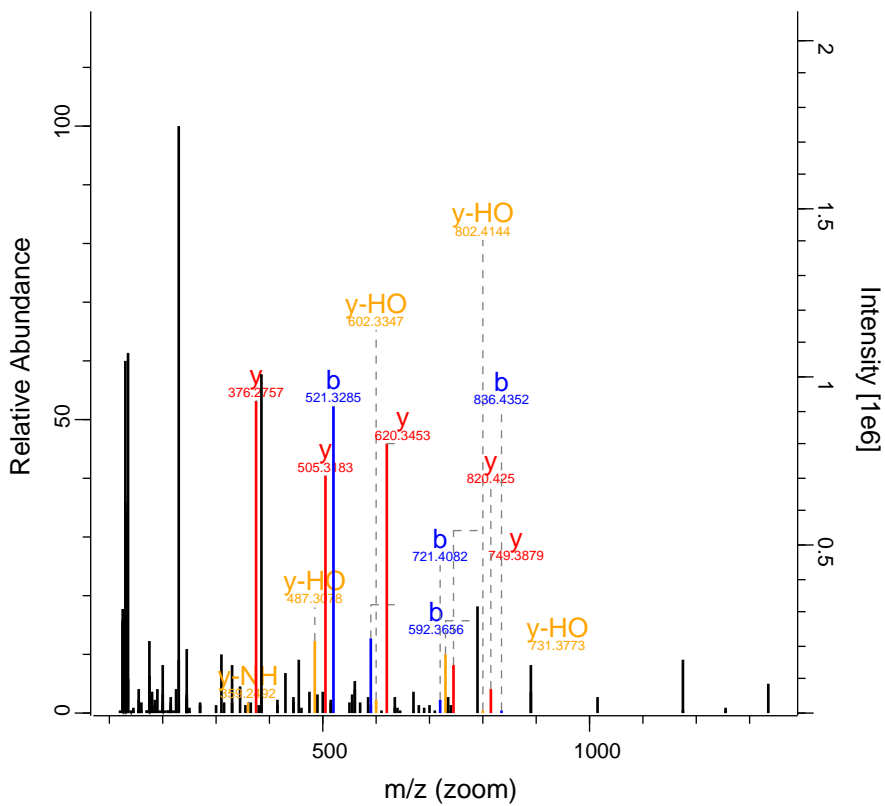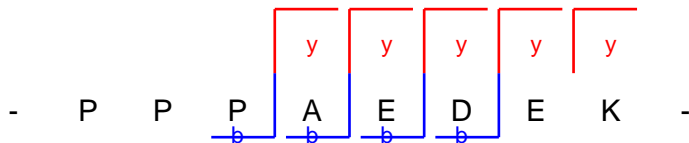

RO-QC-160121\_ZackD\_SS\_Set\_02\_Fraction 5693 FTMS; HC 129.63 650.35 CD99

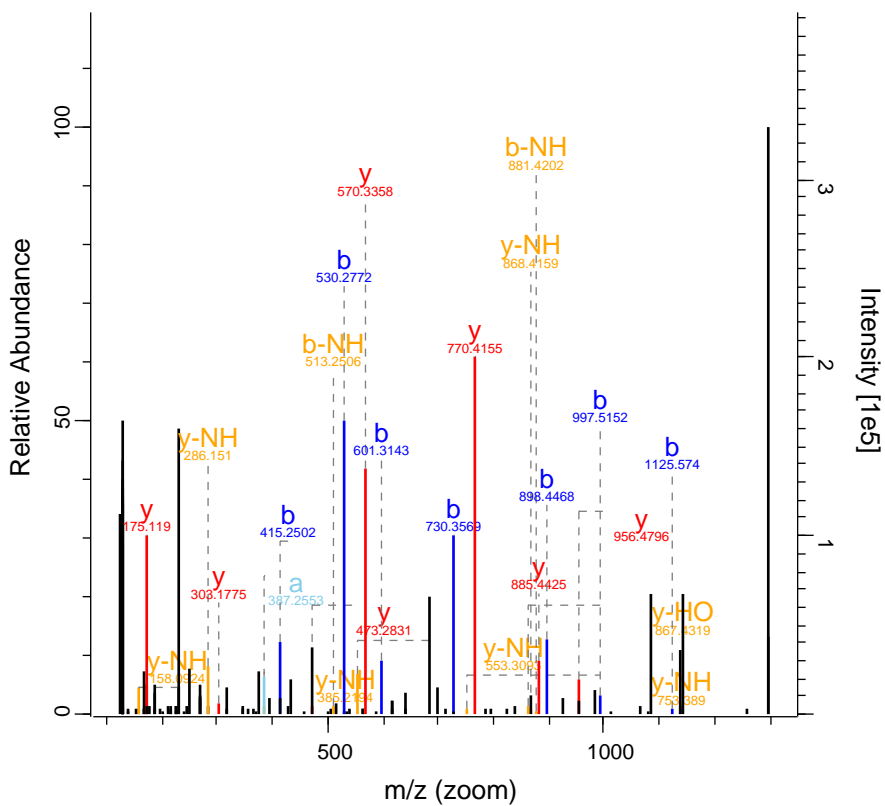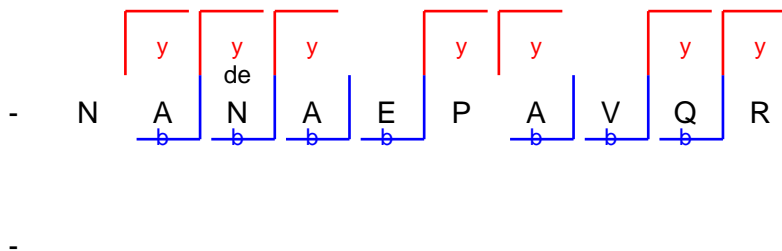

RO-QC-160121\_ZackD\_SS\_Set\_02\_Fraction\_5840 FTMS; HC 113.62 674.3 FZD7

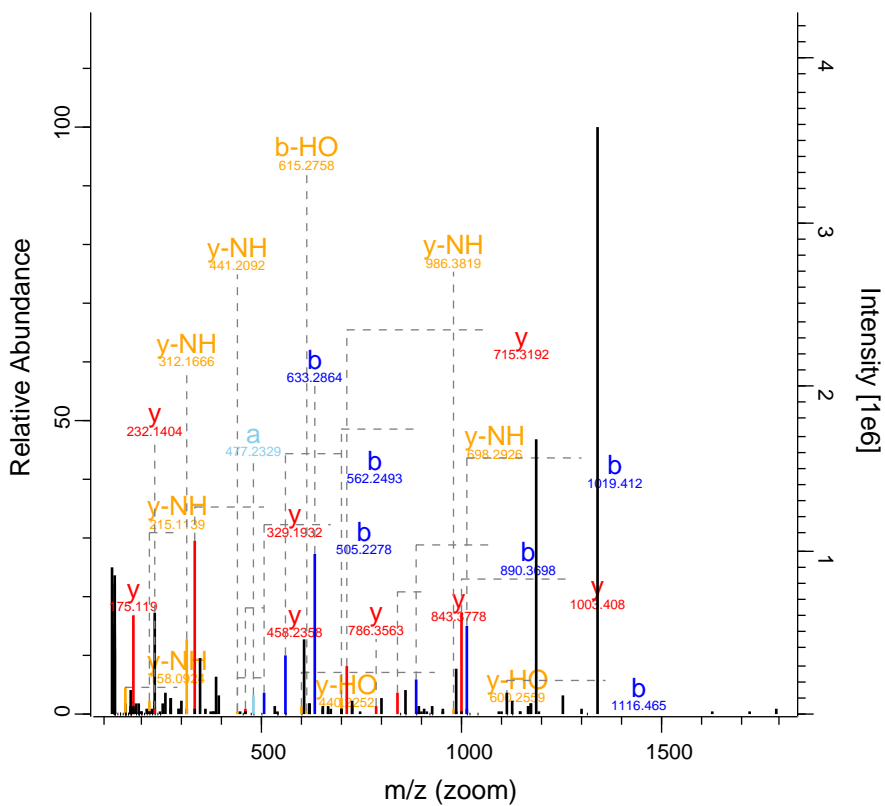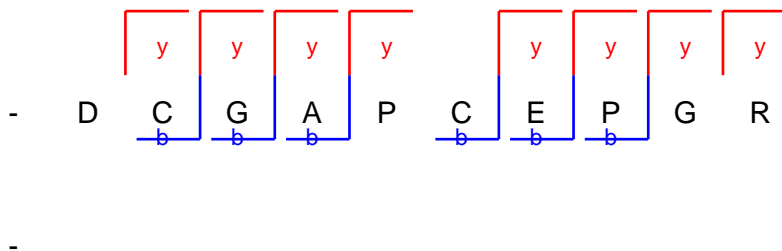



RO-QC-160121\_ZackD\_SS\_Set\_02\_Fraction 5951 FTMS; HC 82.64 630.32 SPRED3

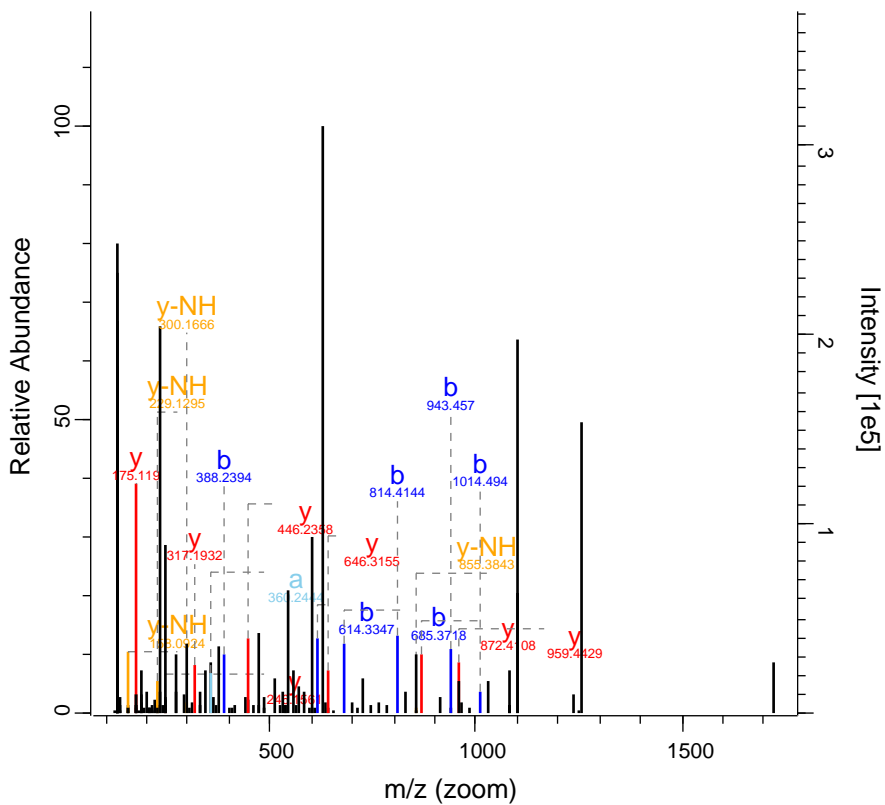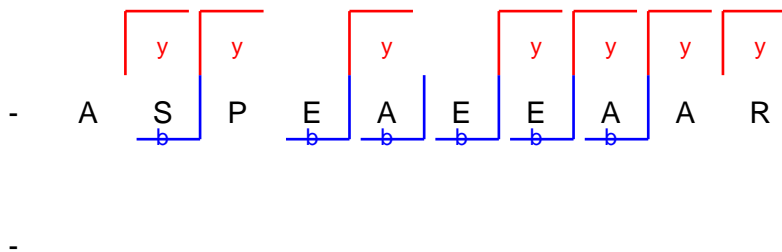

RO-QC-160121\_ZackD\_SS\_Set\_02\_Fraction 5967 FTMS; HC 81.26 650.35 CD99

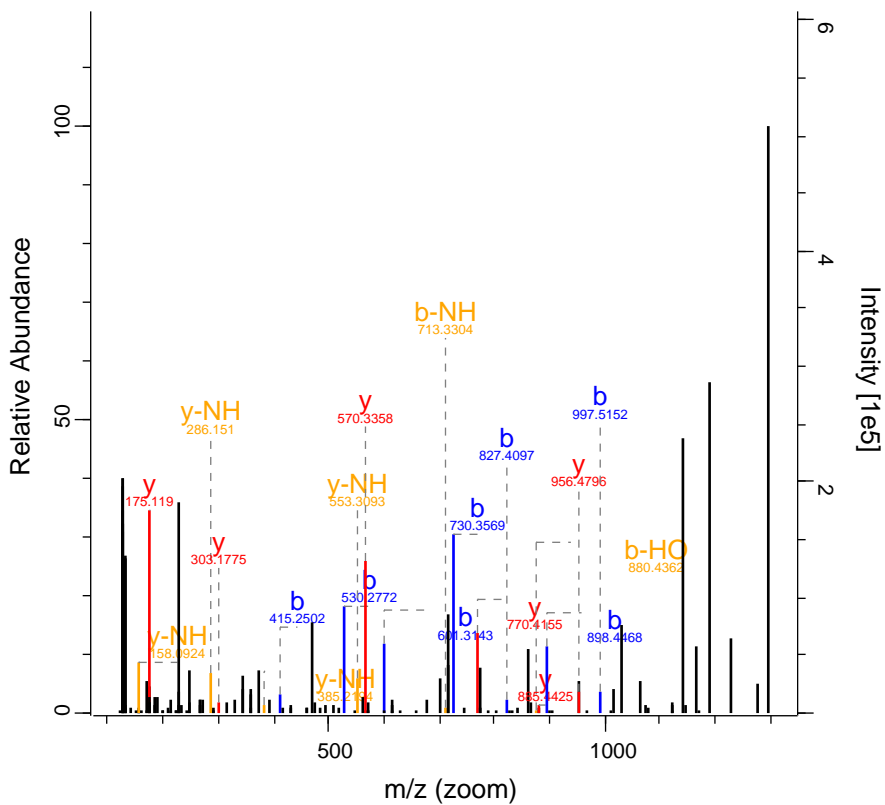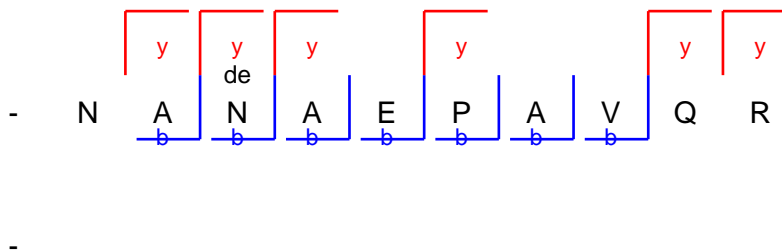

RO-QC-160121\_ZackD\_SS\_Set\_02\_Fraction 6180 FTMS; HC 124.98 678.39 ADAT2

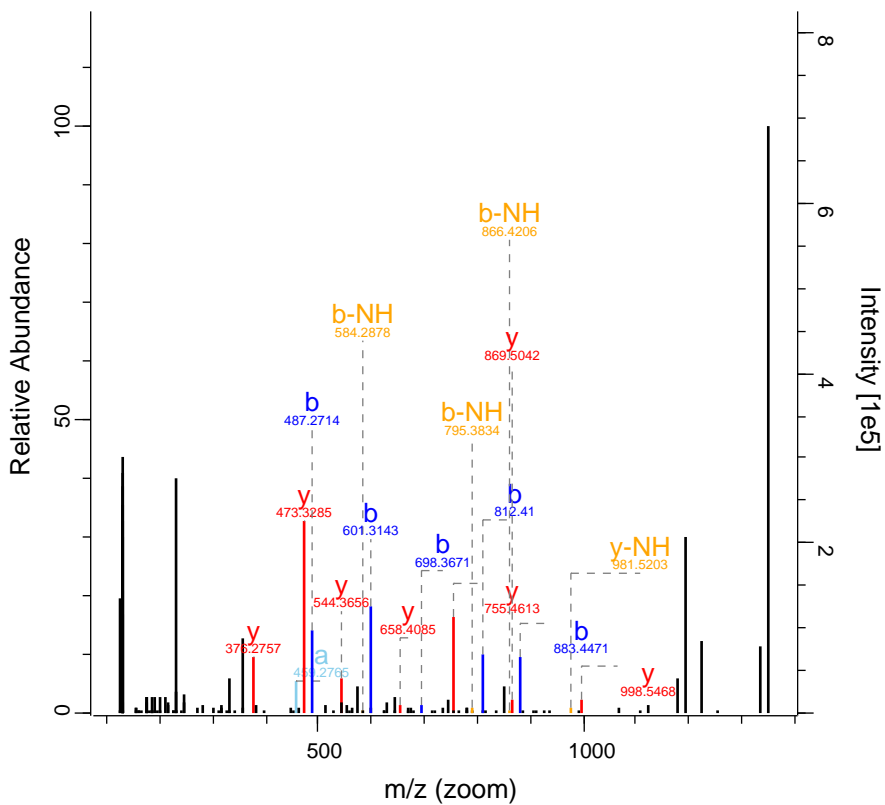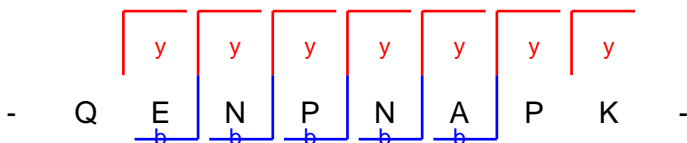

RO-QC-160121\_ZackD\_SS\_Set\_02\_Fraction 6193 FTMS; HC 76.35 668.82 DSG1

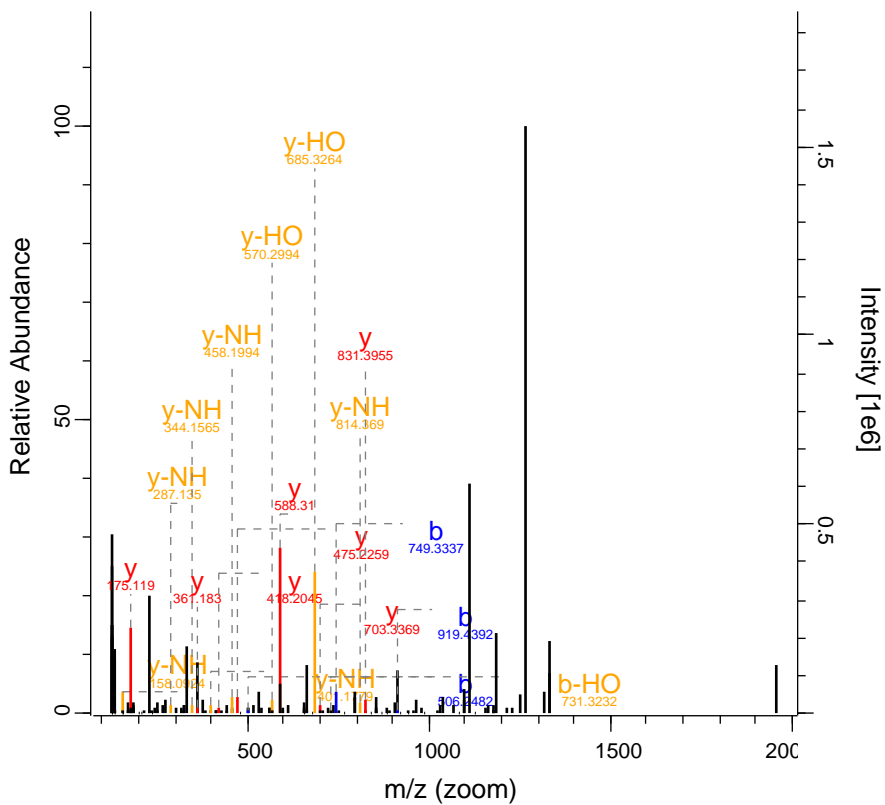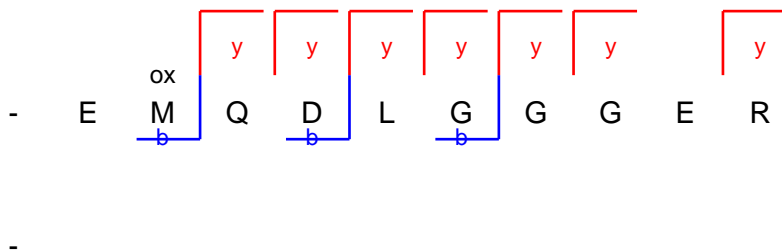

RO-QC-160121\_ZackD\_SS\_Set\_02\_Fraction 6407 FTMS; HC 137.85 650.35 CD99

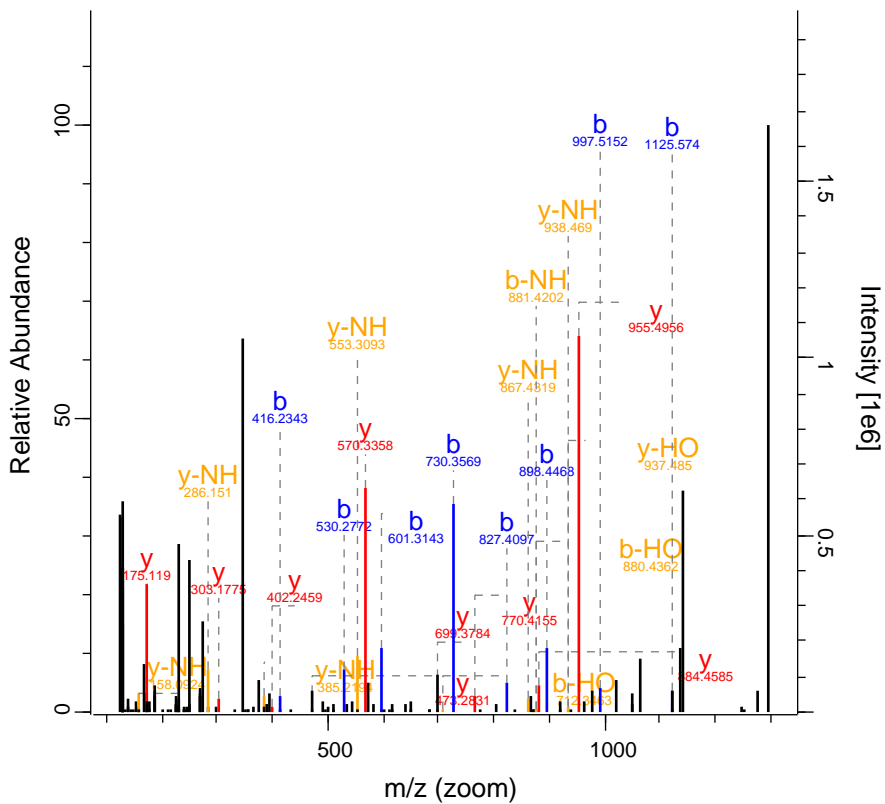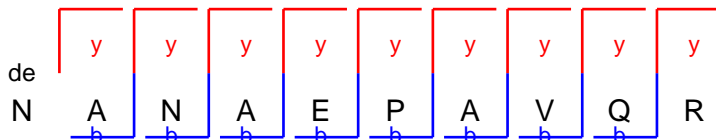

Raw File

Scan Method Score m/z

RO-QC-160121\_ZackD\_SS\_Set\_02\_Fraction\_10

6687 FTMS; HCD 89.75 460.92

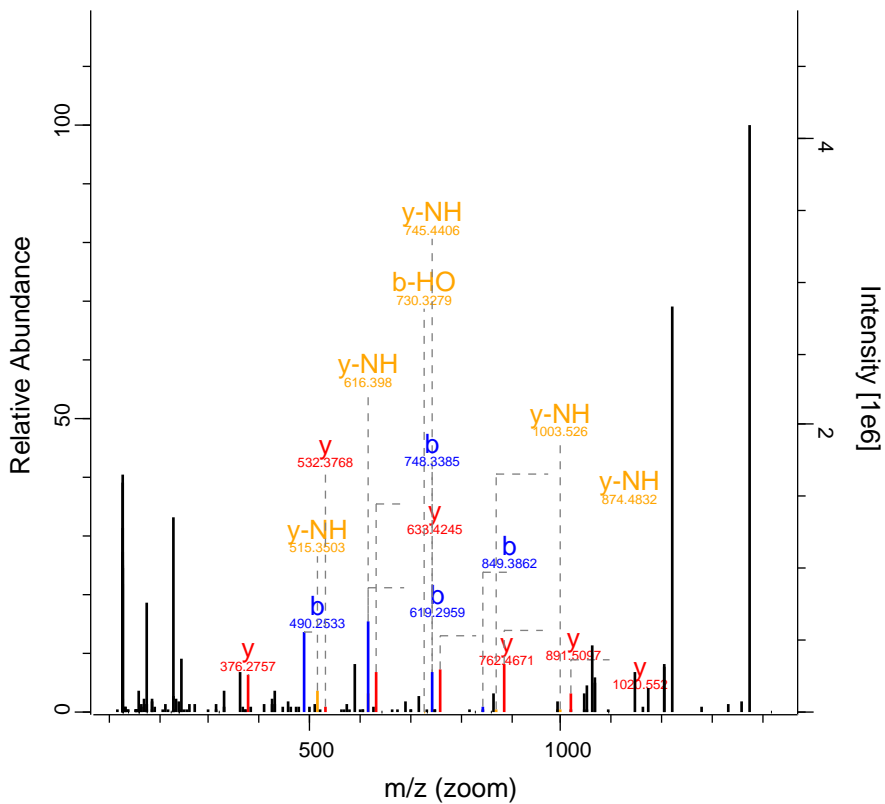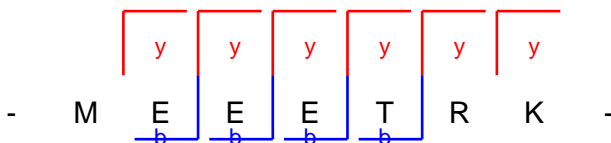

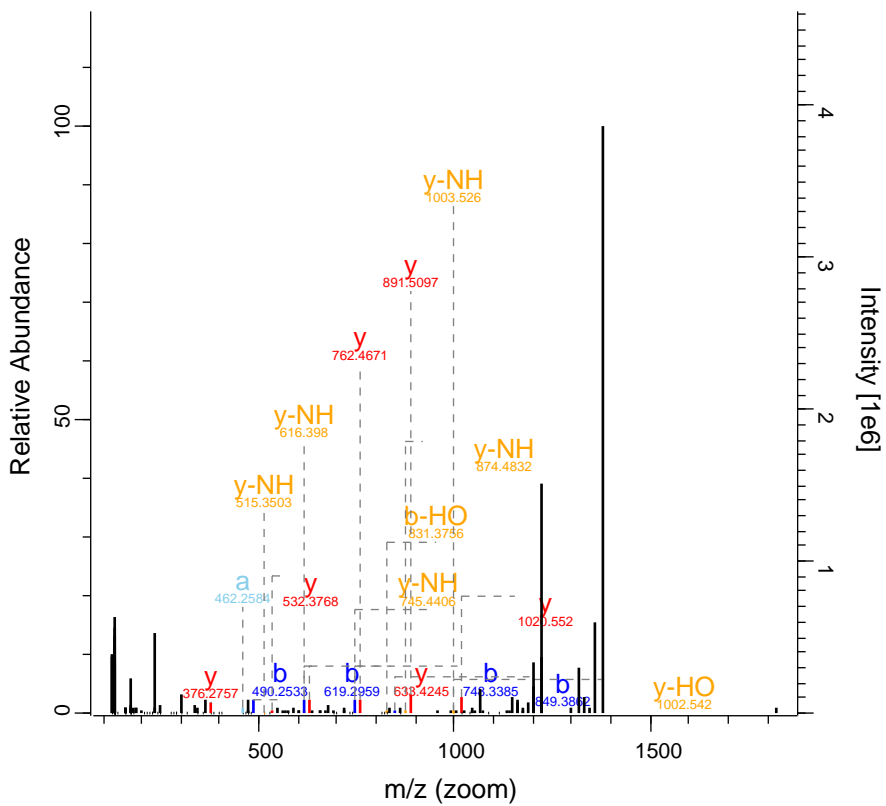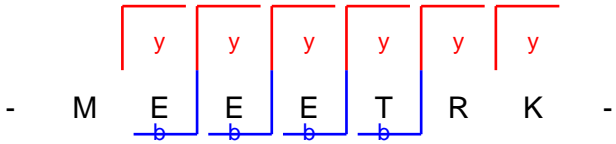

Raw File

Scan Method Score m/z

RO-QC-160121\_ZackD\_SS\_Set\_02\_Fraction\_10

7146 FTMS; HCD 39.7 352.79

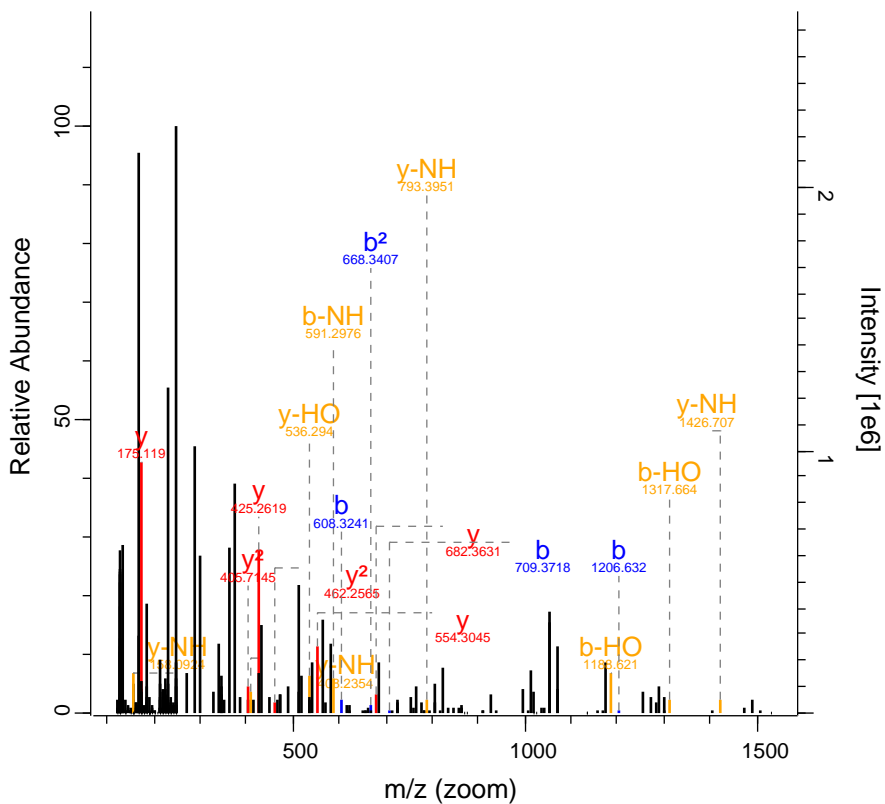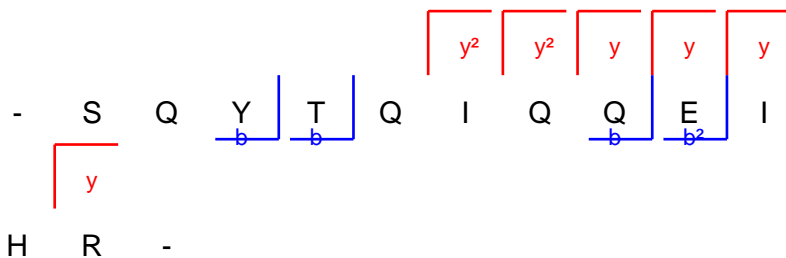



RO-QC-160121\_ZackD\_SS\_Set\_02\_Fraction 7397 FTMS; HC 61.65 498.95 PARP16

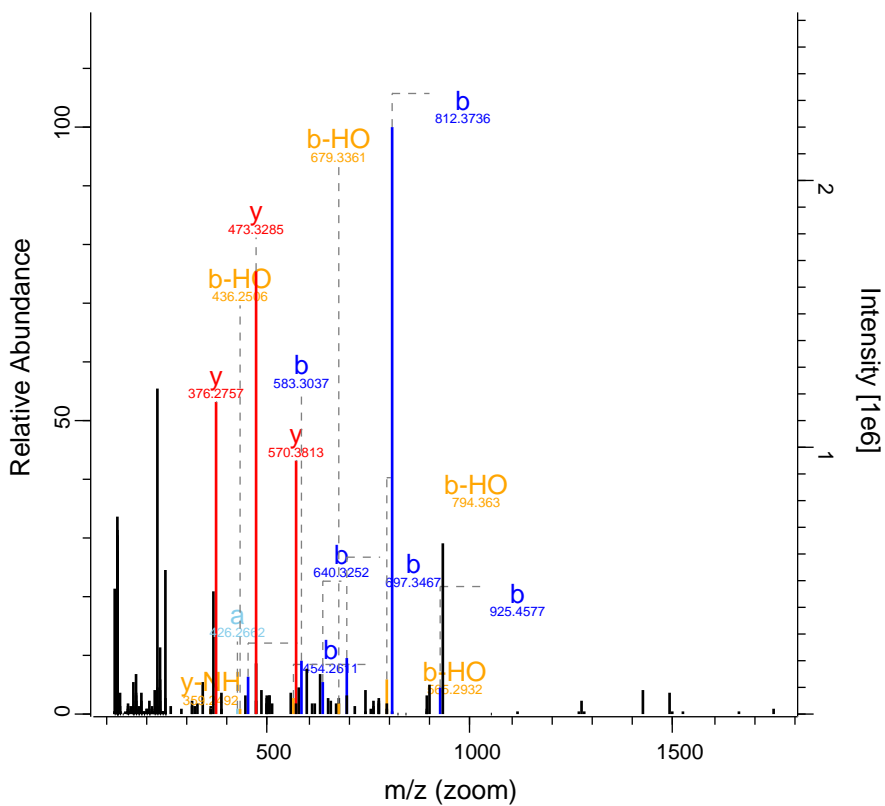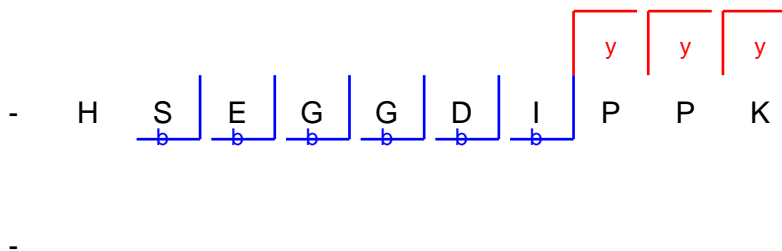

RO-QC-160121\_ZackD\_SS\_Set\_02\_Fraction 7672 FTMS; HC 76.81 748.35 ANAPC16

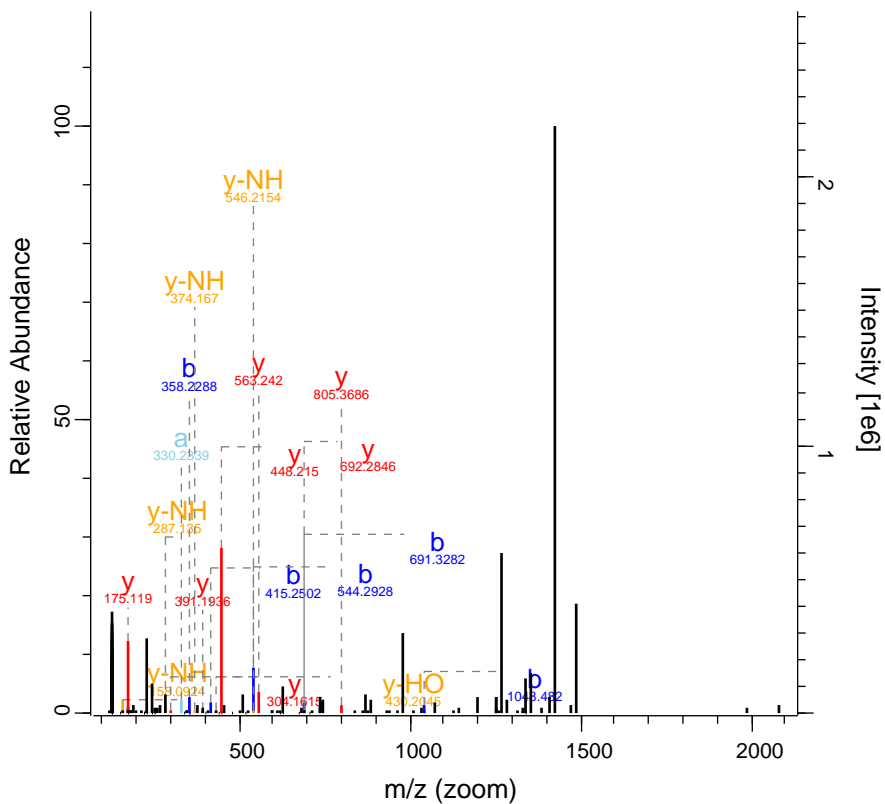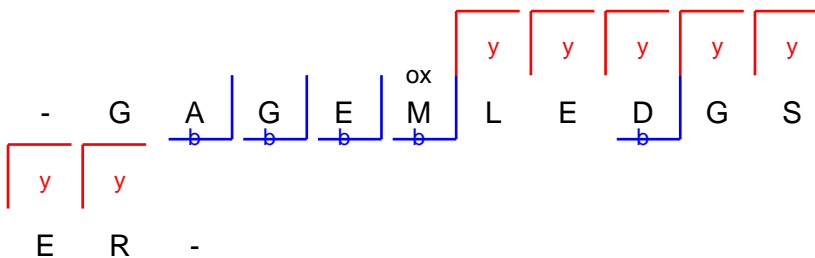

RO-QC-160121\_ZackD\_SS\_Set\_02\_Fraction 8927 FTMS; HC 95.77 699.82 C11orf57

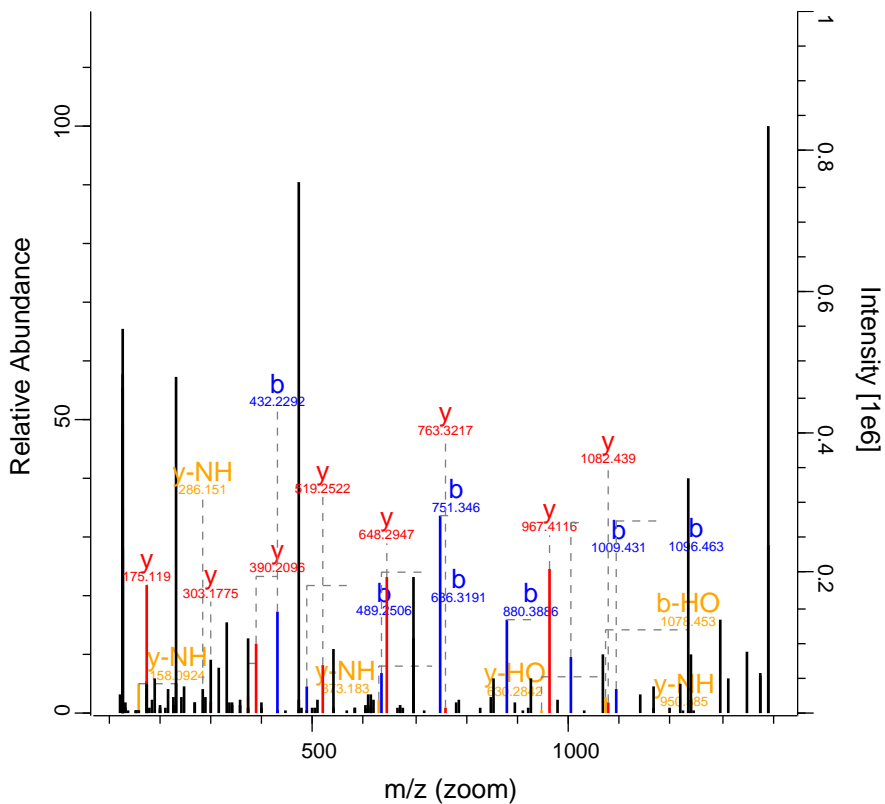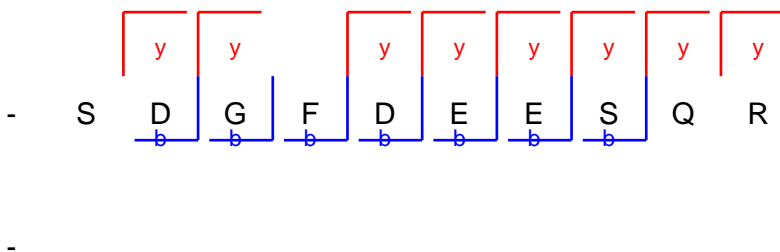

RO-QC-160121\_ZackD\_SS\_Set\_02\_Fraction11981 FTMS; HC 109.11 730.38 SLC16A10

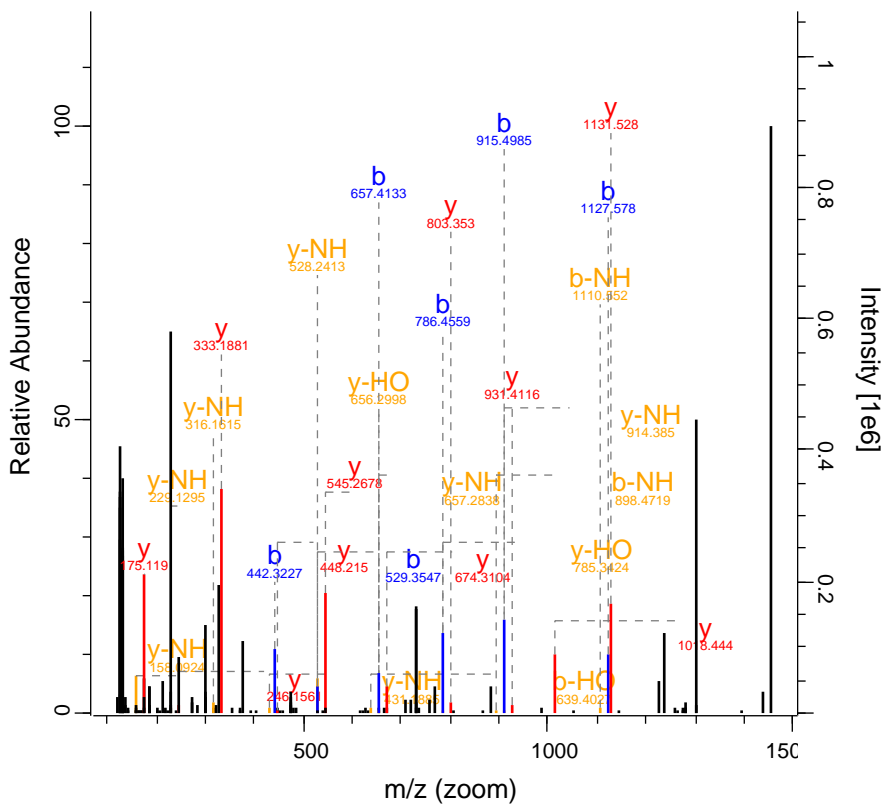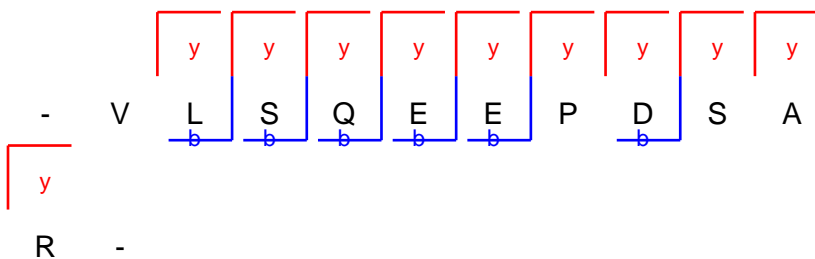



RO-QC-160121\_ZackD\_SS\_Set\_02\_Fraction 12170 FTMS; HC 68.91 729.45 SFMBT2

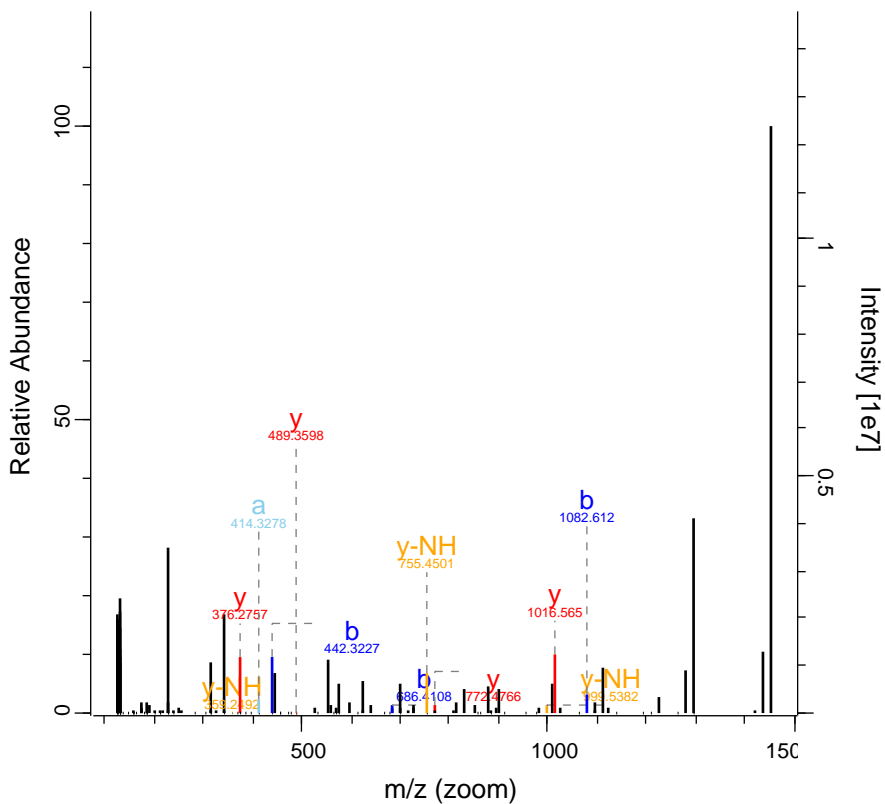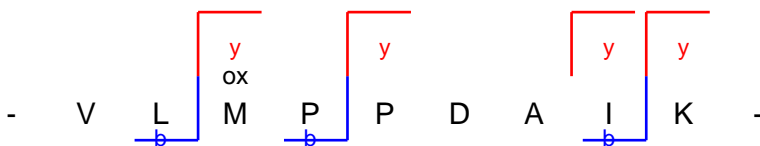

RO-QC-160121\_ZackD\_SS\_Set\_02\_Fraction12294 FTMS; HC 252.16 798.37 FXD1

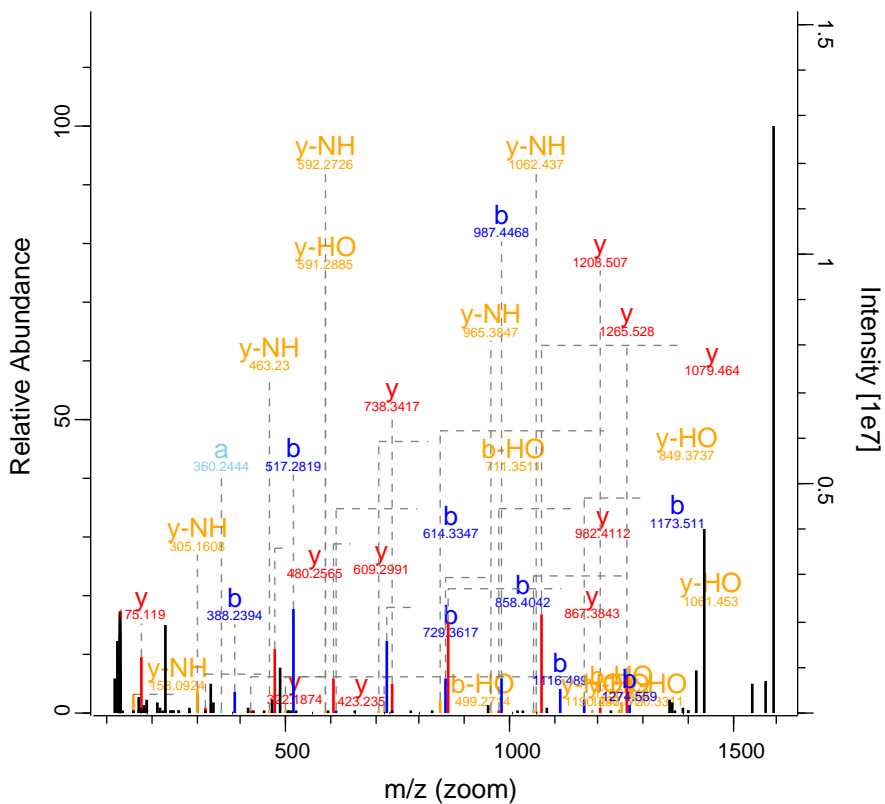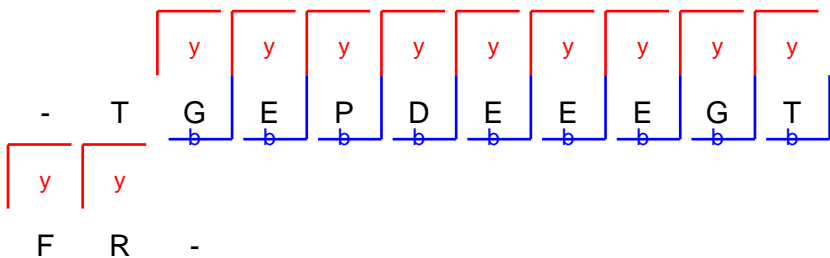

RO-QC-160121\_ZackD\_SS\_Set\_02\_Fraction1 12441 FTMS; HC 99.28 826.45 PDPN

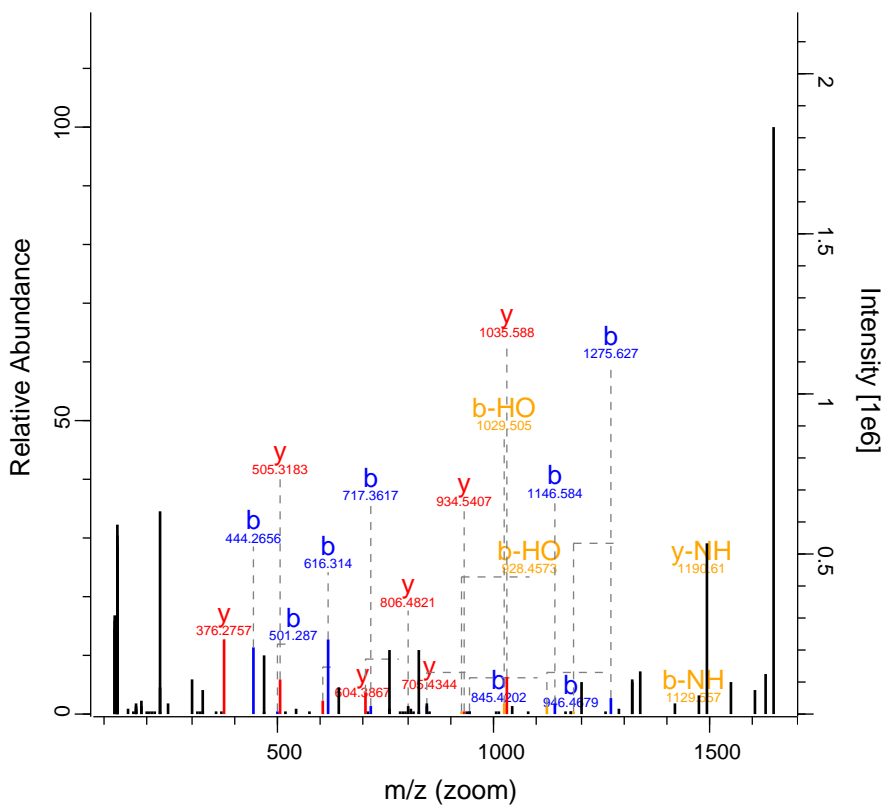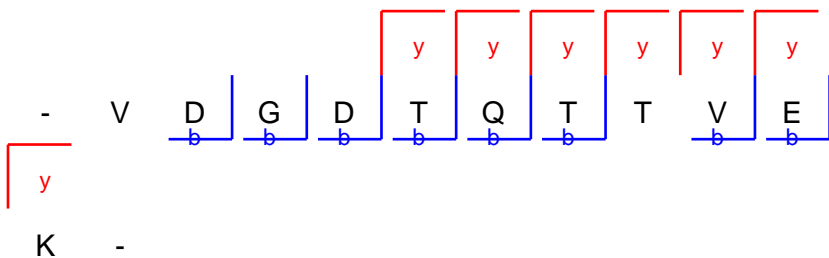

K



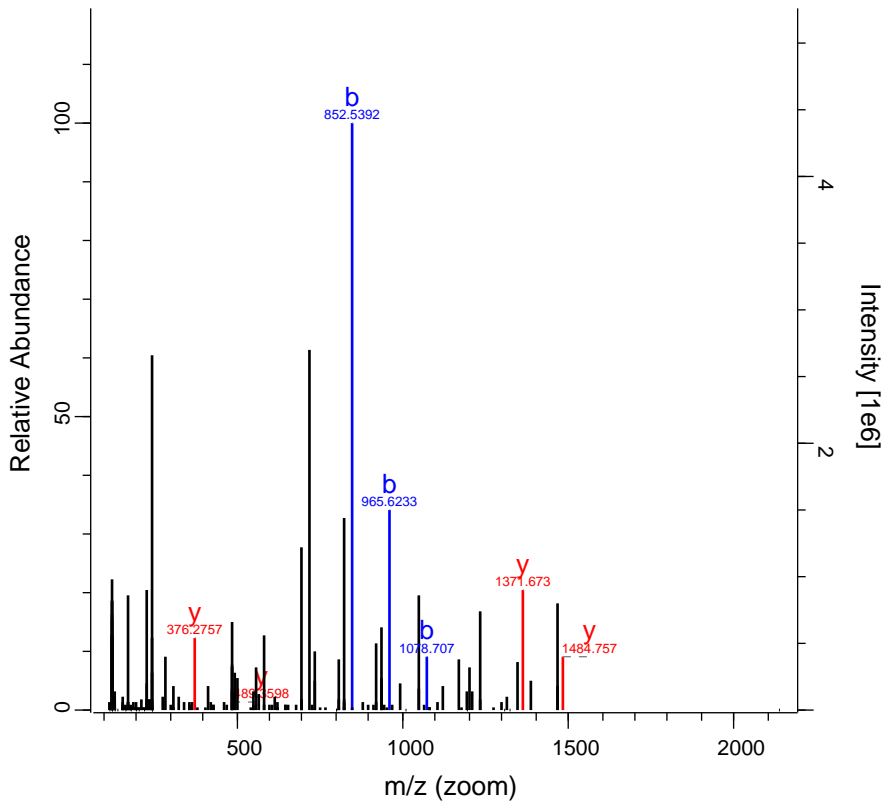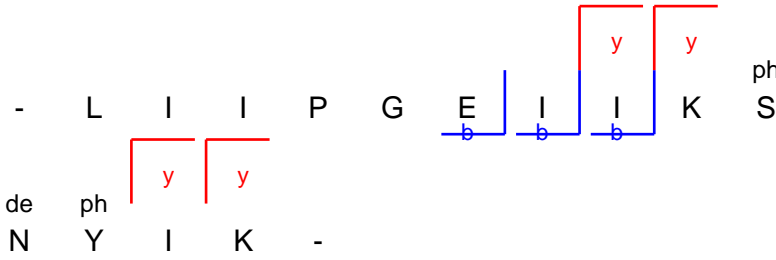

de ph Y I K -

RO-QC-160121\_ZackD\_SS\_Set\_02\_Fraction 13434 FTMS; HC 144.38 602.89 EXOC3L4

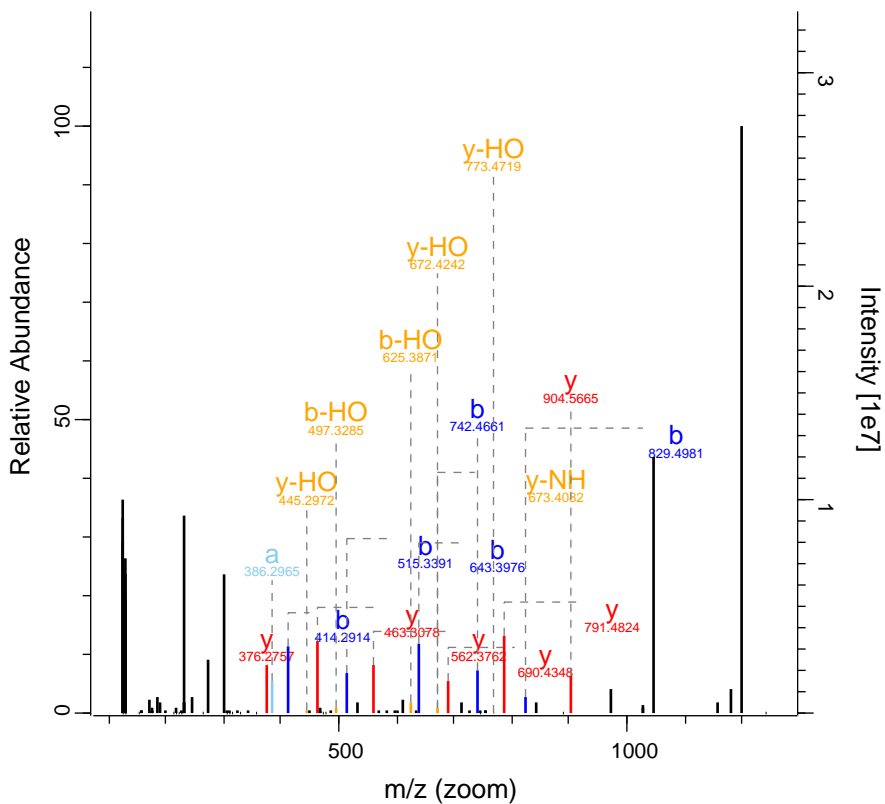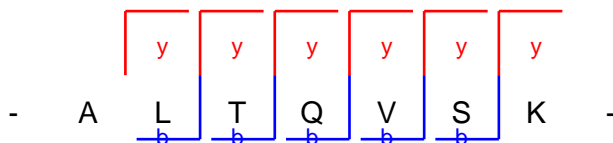

RO-QC-160121\_ZackD\_SS\_Set\_02\_Fraction 13638 FTMS; HC 125.16 671.36 MKS1

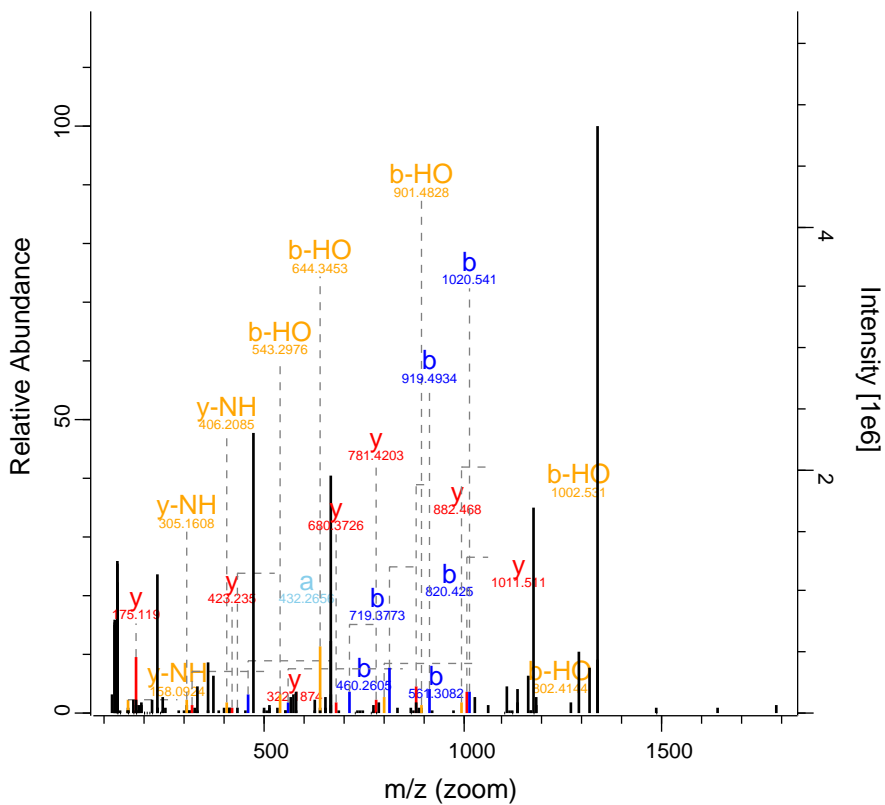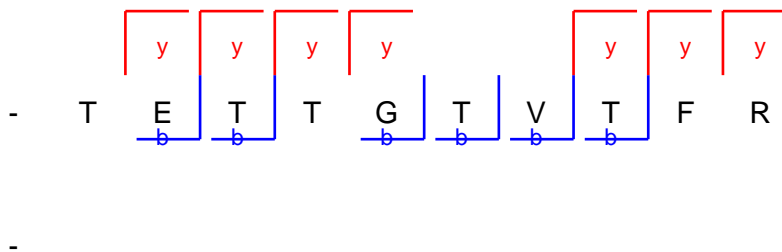

RO-QC-160121\_ZackD\_SS\_Set\_02\_Fraction13703 FTMS; HC 116.73 602.89 EXOC3L4

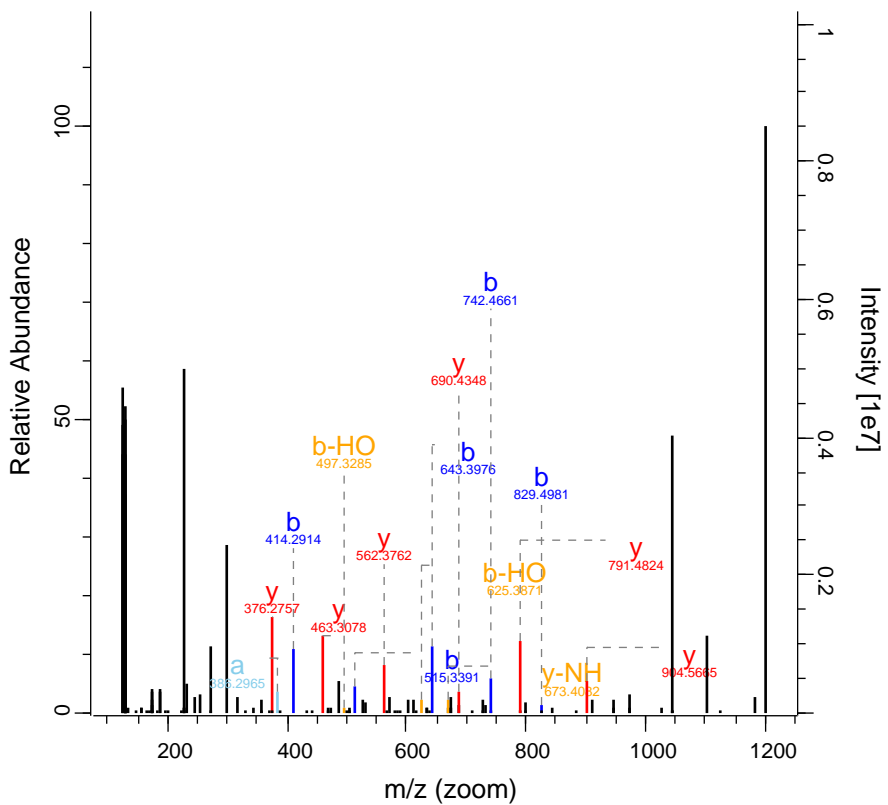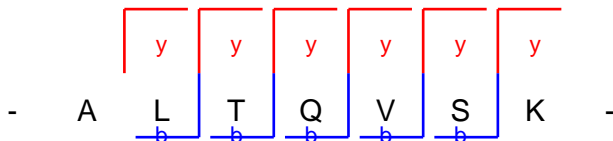

Raw File

Scan Method Score m/z

RO-QC-160121\_ZackD\_SS\_Set\_02\_Fraction\_10

15013 FTMS; HCD 49.36 378.21

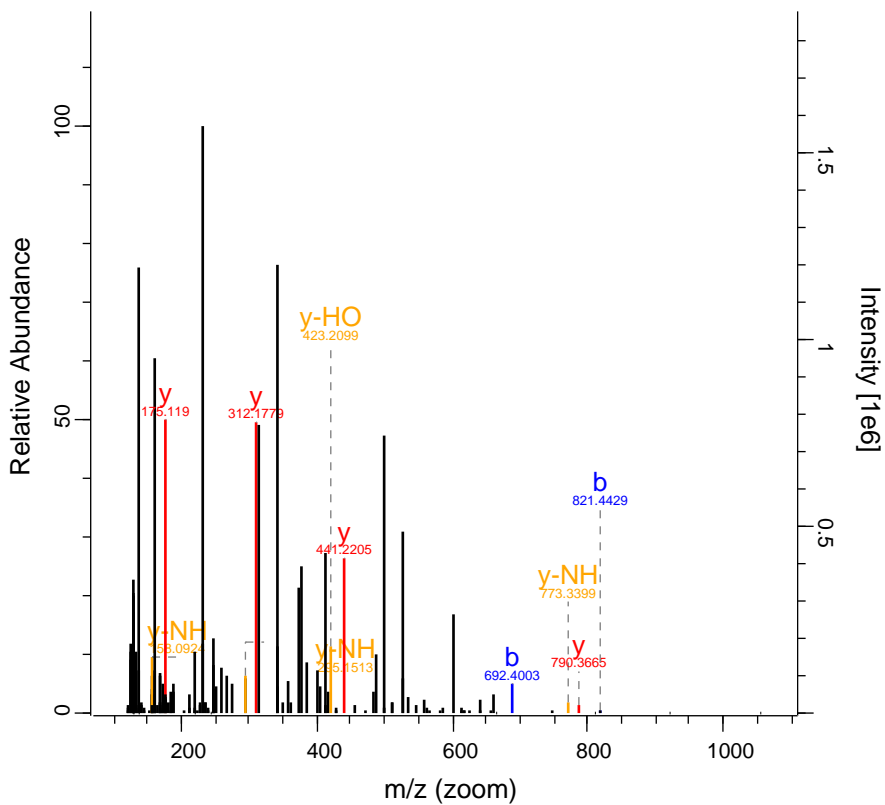

RO-QC-160121\_ZackD\_SS\_Set\_02\_Fraction 15168 FTMS; HC 93.45 719.9 CYSTM1

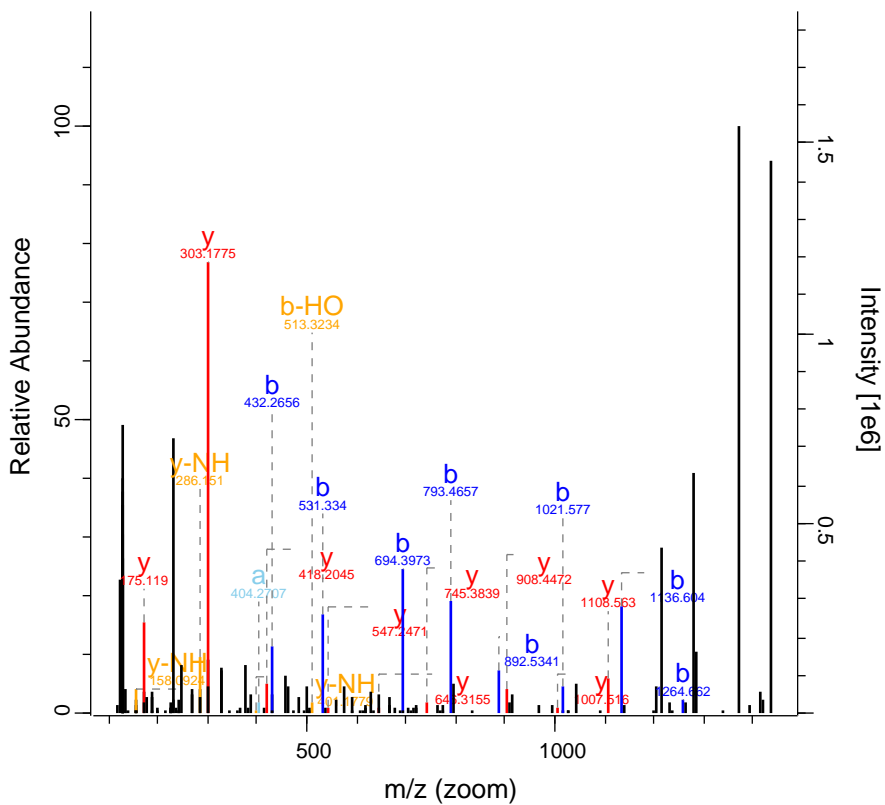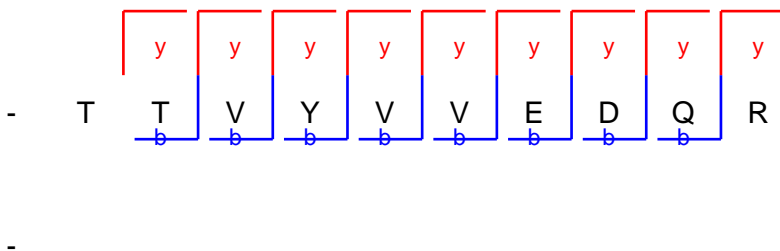

RO-QC-160121\_ZackD\_SS\_Set\_02\_Fraction 15170 FTMS; HC 77.68 413.57 TAF12

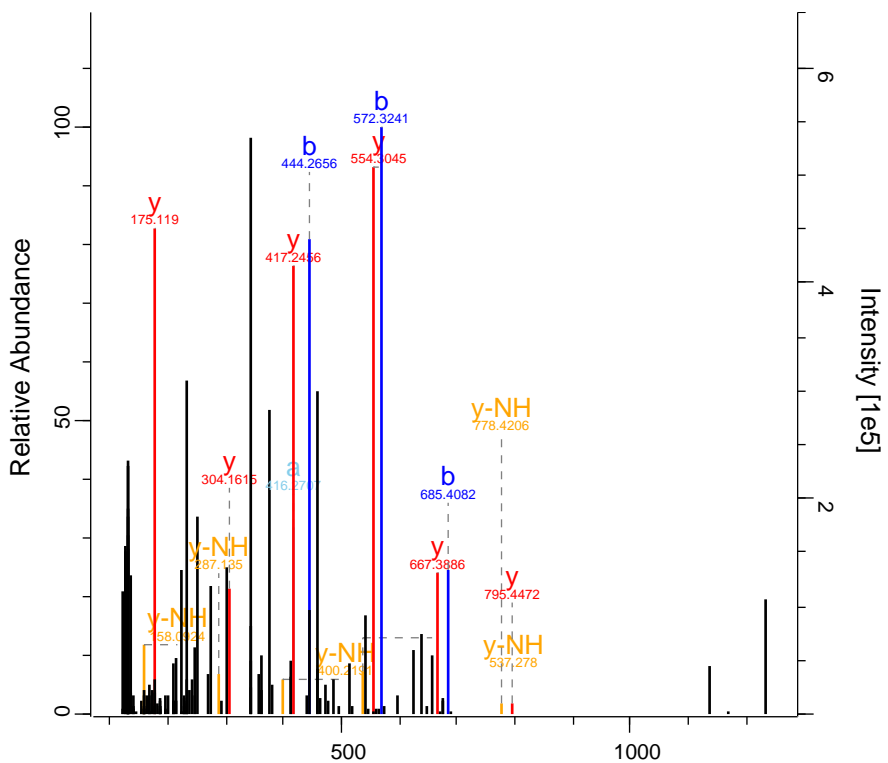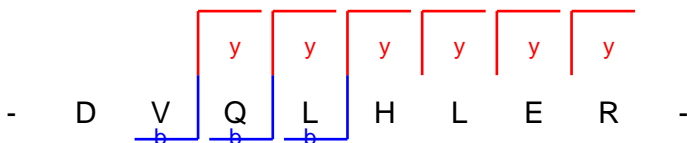

RO-QC-160121\_ZackD\_SS\_Set\_02\_Fraction 15399 FTMS; HC 74.2 720.39 CYSTM1

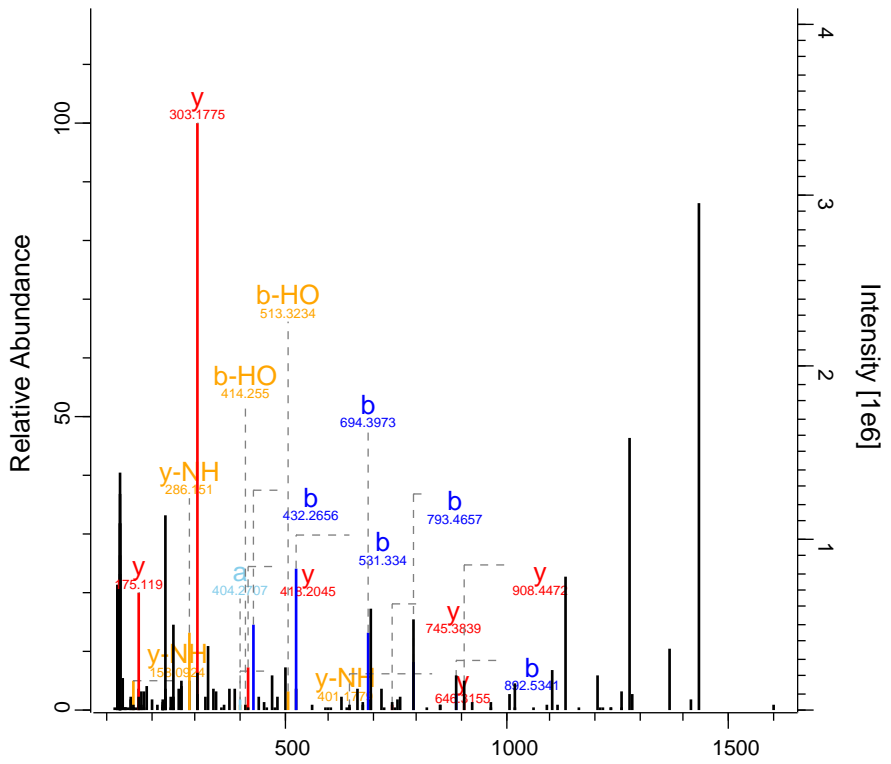

m/z (zoom)

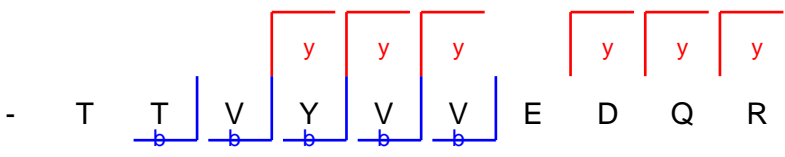





RO-QC-160121\_ZackD\_SS\_Set\_02\_Fraction 16961 FTMS; HC 87.48 608.34 UTS2

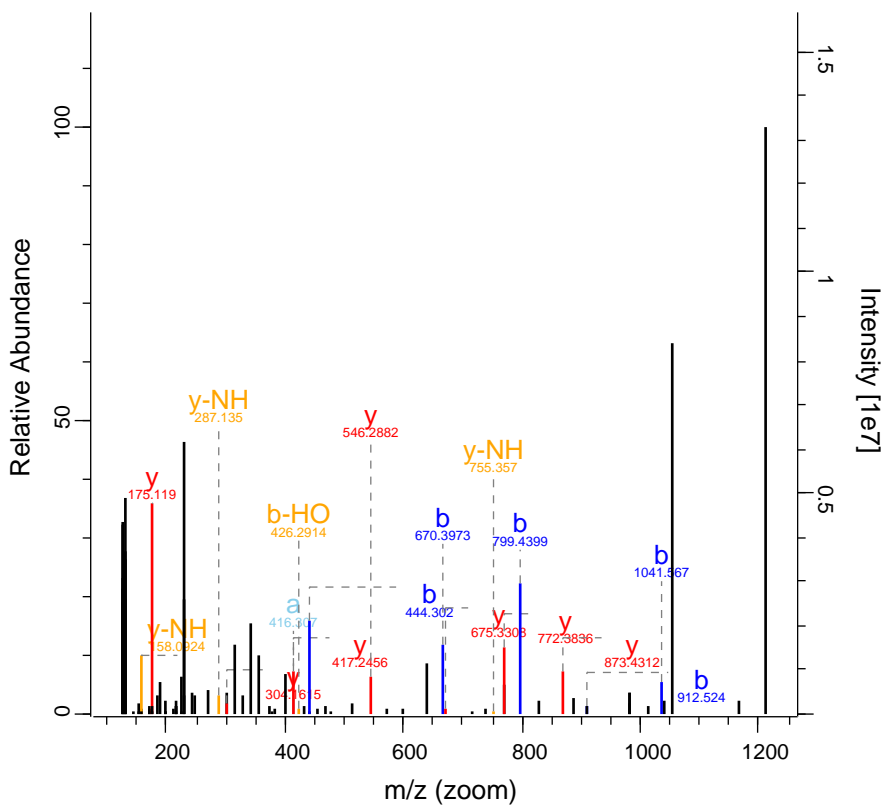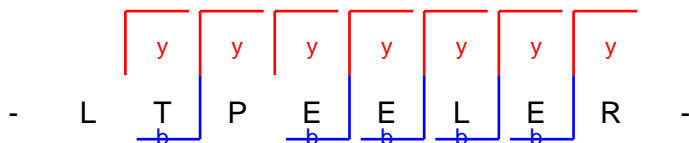

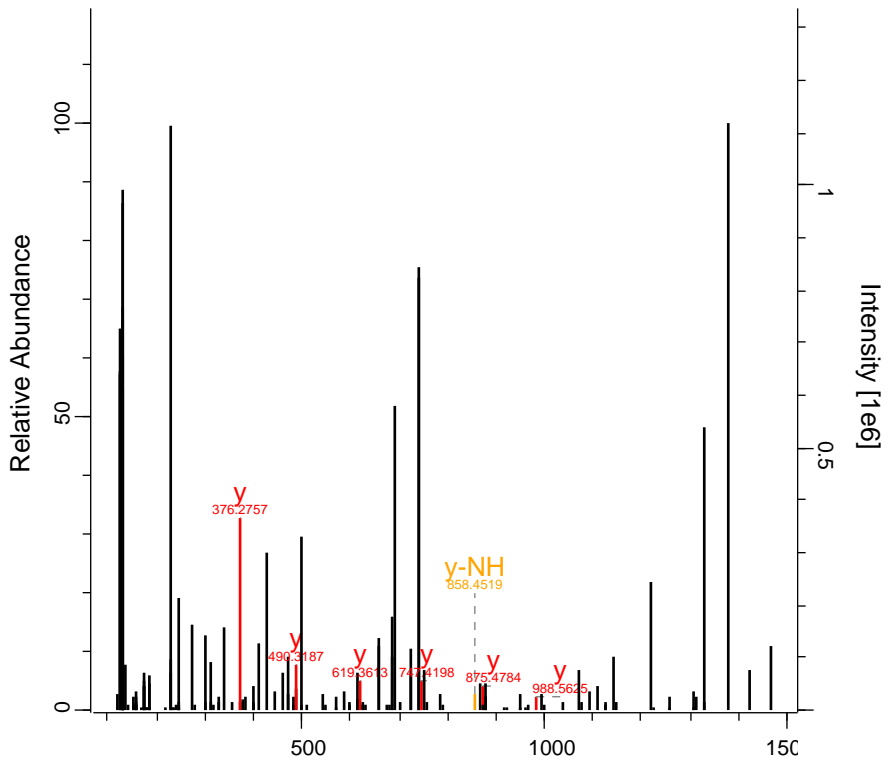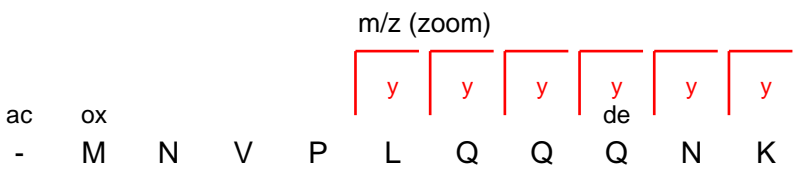

-

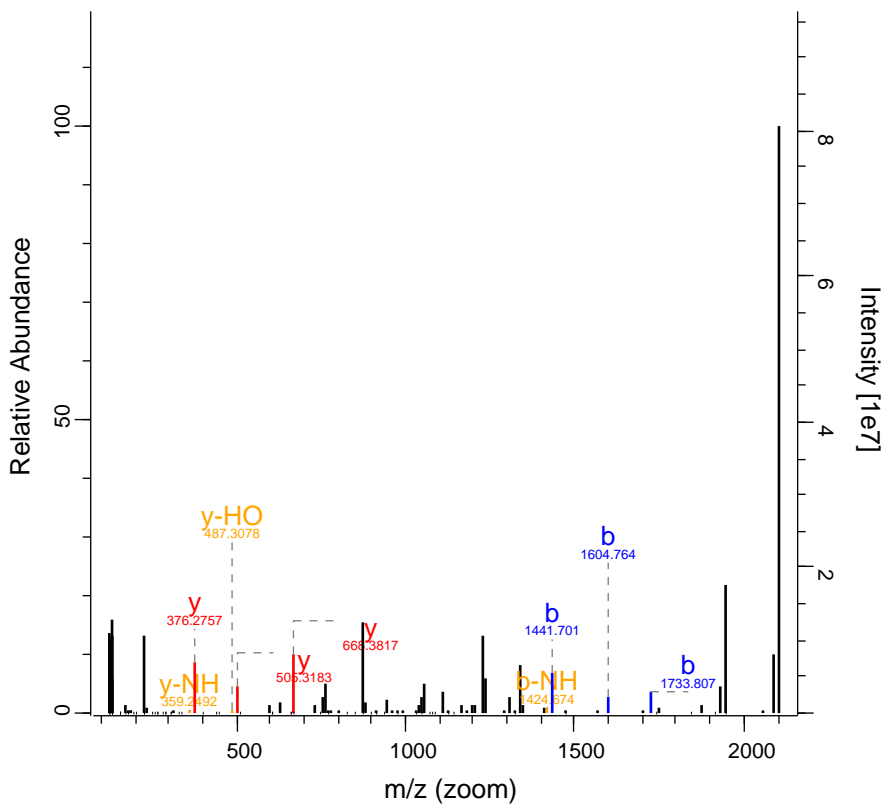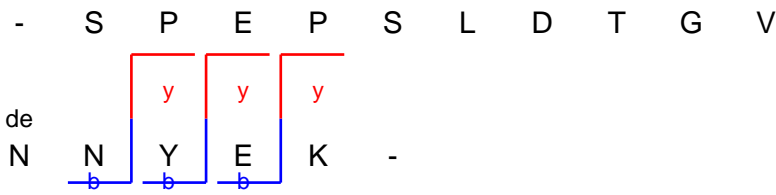

Raw File

Scan Method Score m/z

RO-QC-160121\_ZackD\_SS\_Set\_02\_Fraction\_10

18580 FTMS; HCD 79.12 587.38

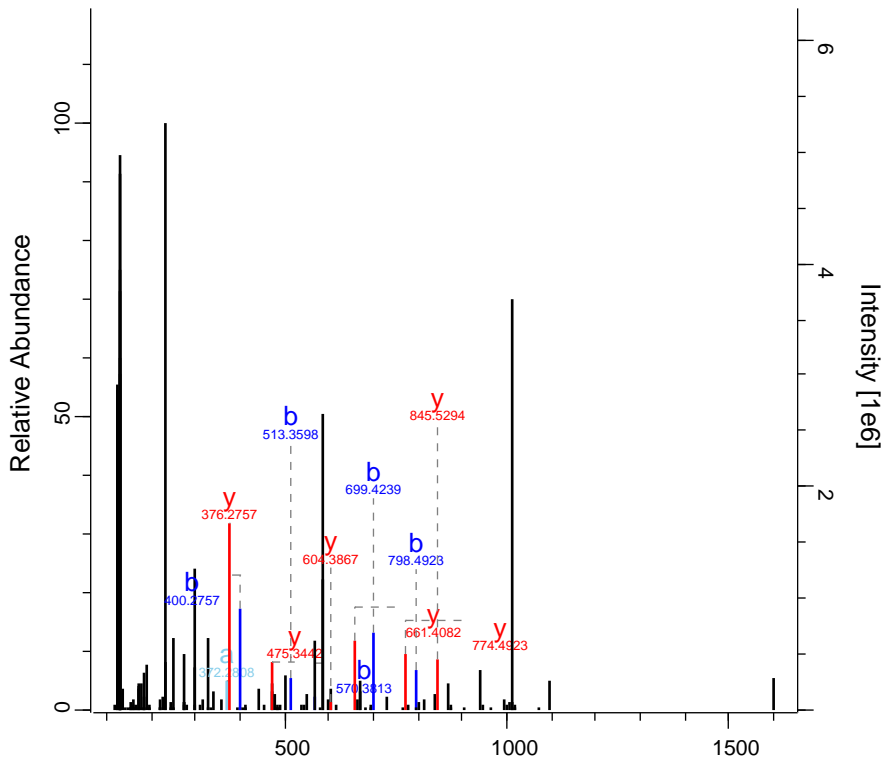

m/z (zoom)

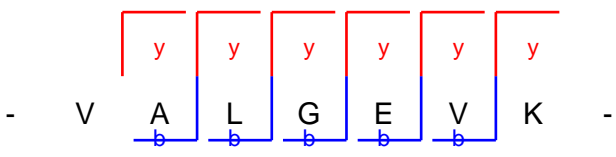

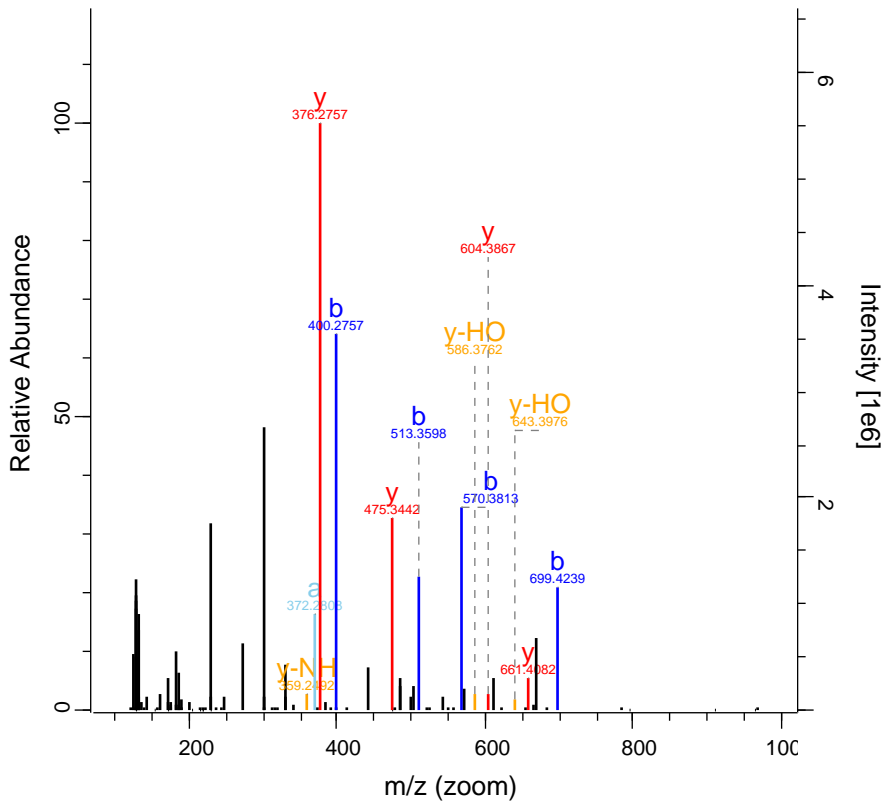

RO-QC-160121\_ZackD\_SS\_Set\_02\_Fraction 18713 FTMS; HC 87.48 721.92 PPP1R2P1

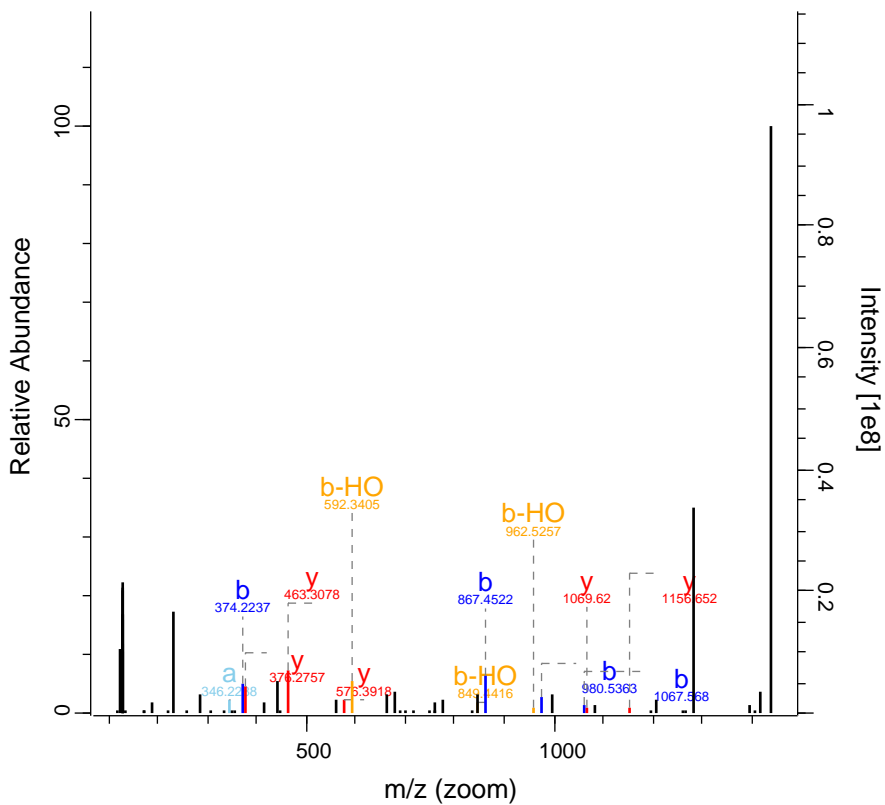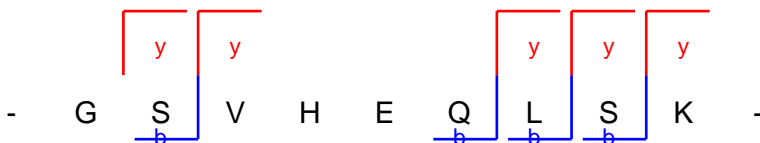

RO-QC-160121\_ZackD\_SS\_Set\_02\_Fraction18724 FTMS; HC 84.52 768.43 NAT1

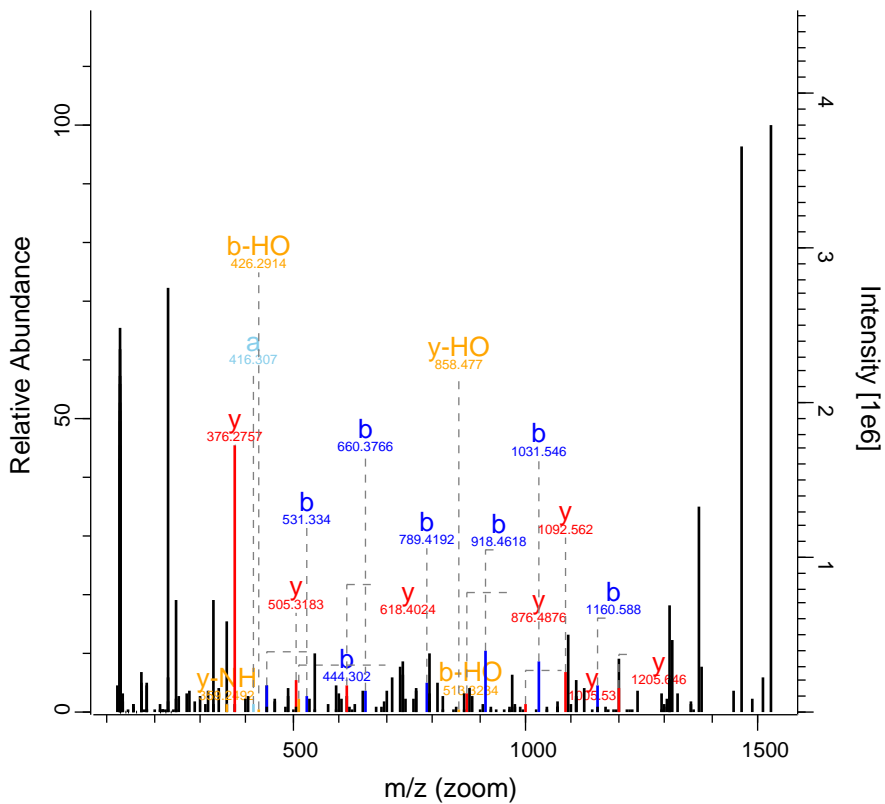

m/z (zoom)

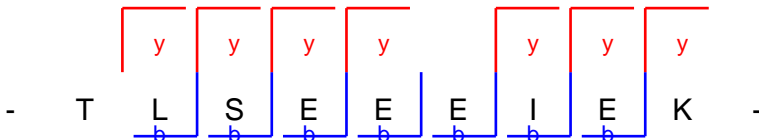



RO-QC-160121\_ZackD\_SS\_Set\_02\_Fraction 18943 FTMS; HC 93.6 754.92 POC1B

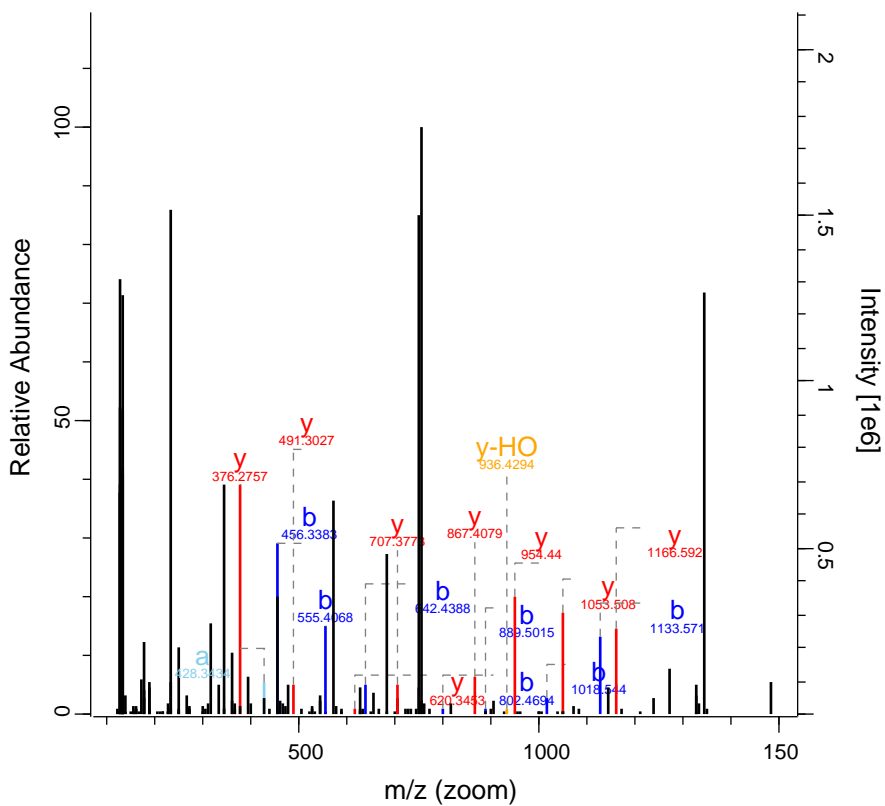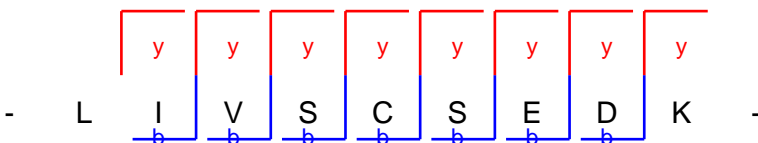

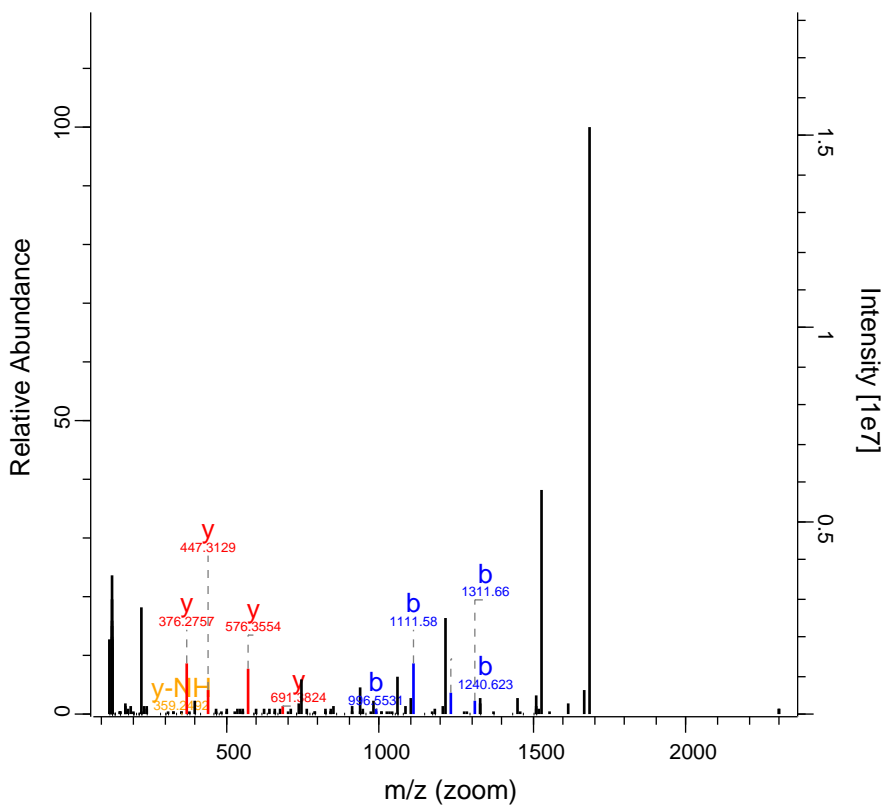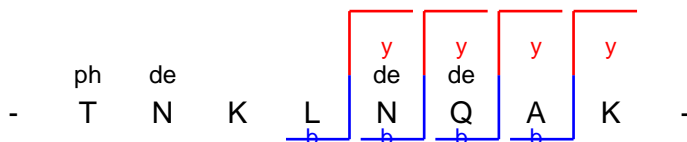

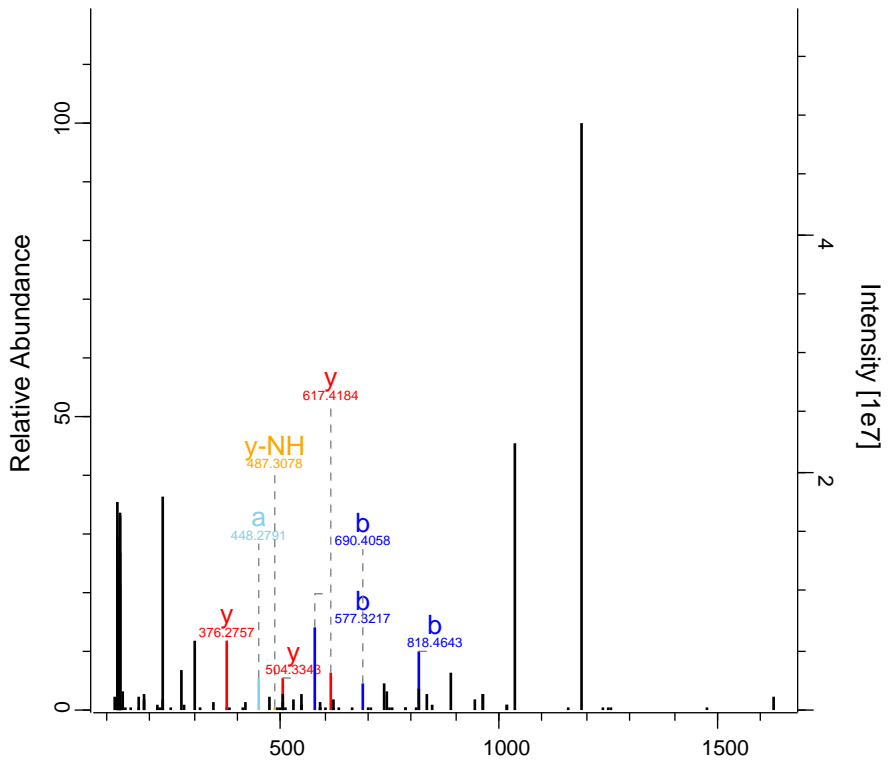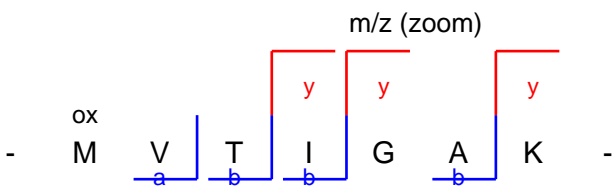

RO-QC-160121\_ZackD\_SS\_Set\_02\_Fraction 21738 FTMS; HC 53.24 755.05 ADCY10

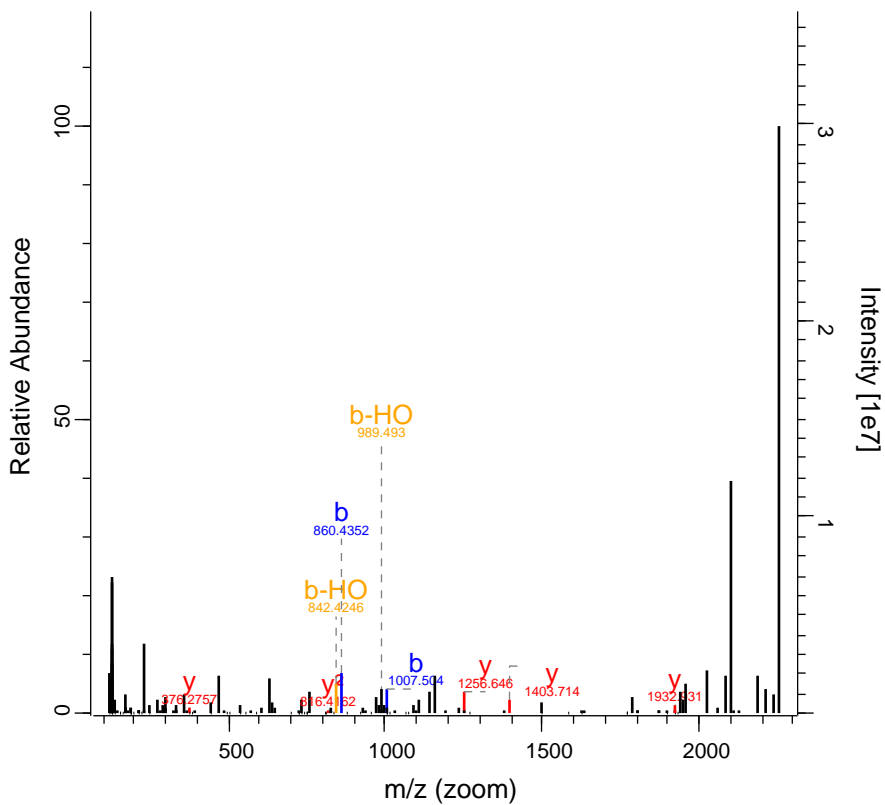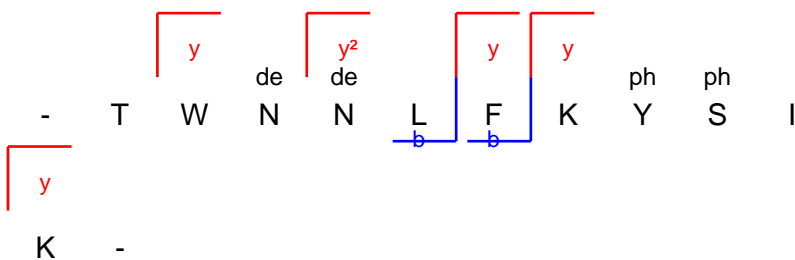



RO-QC-160121\_ZackD\_SS\_Set\_02\_Fraction 23835 FTMS; HC 110.77 989.2 DPY19L3

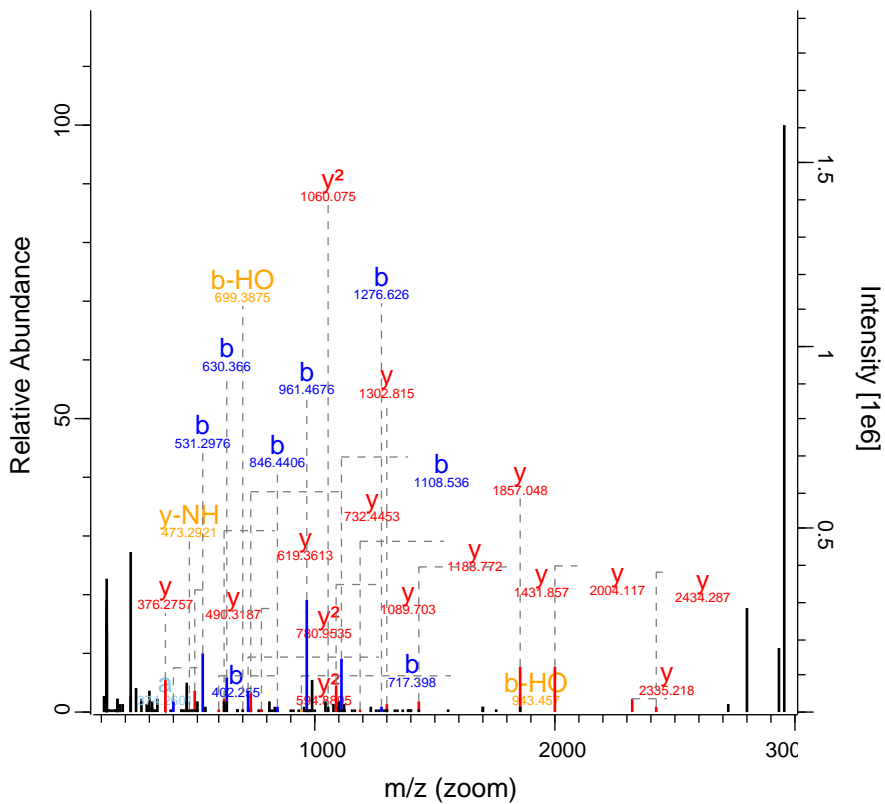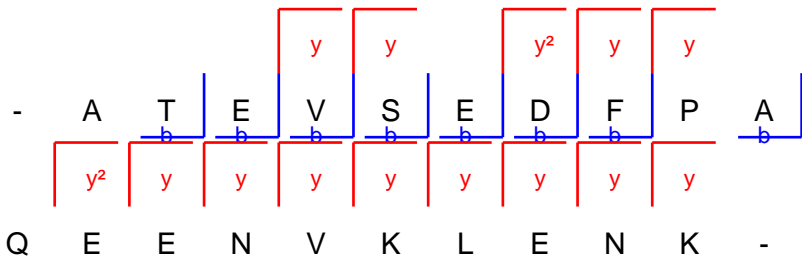

RO-QC-160121\_ZackD\_SS\_Set\_02\_Fraction 23986 FTMS; HC 122.52 708.92 ALG12

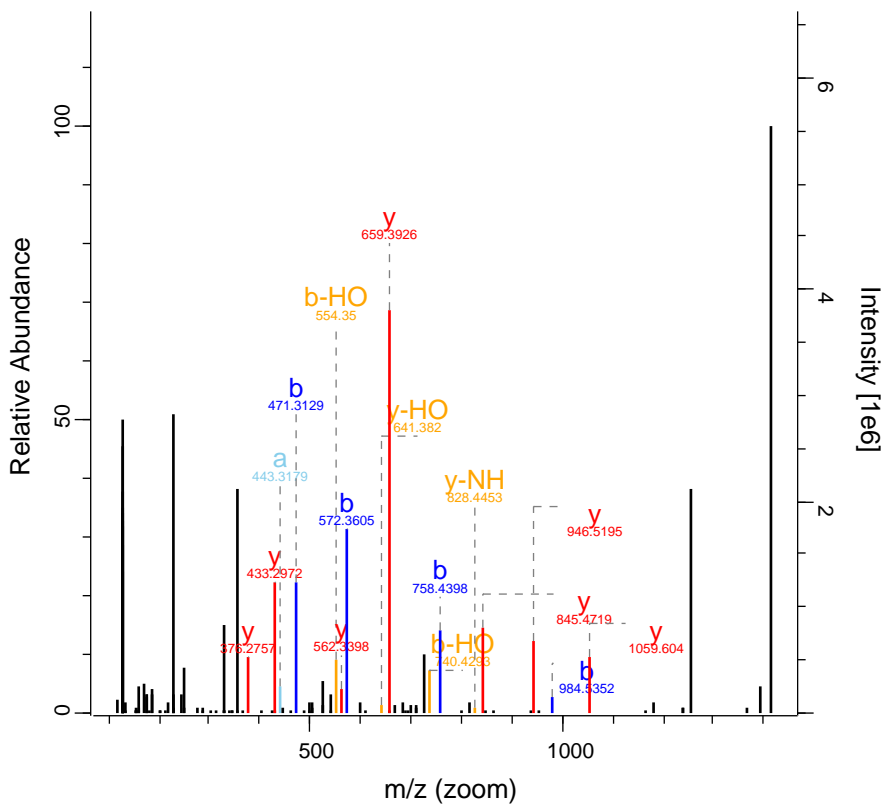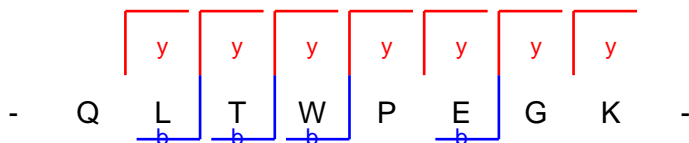

RO-QC-160121\_ZackD\_SS\_Set\_02\_Fraction 24008 FTMS; HC 99.75 972.95 MT-ND3

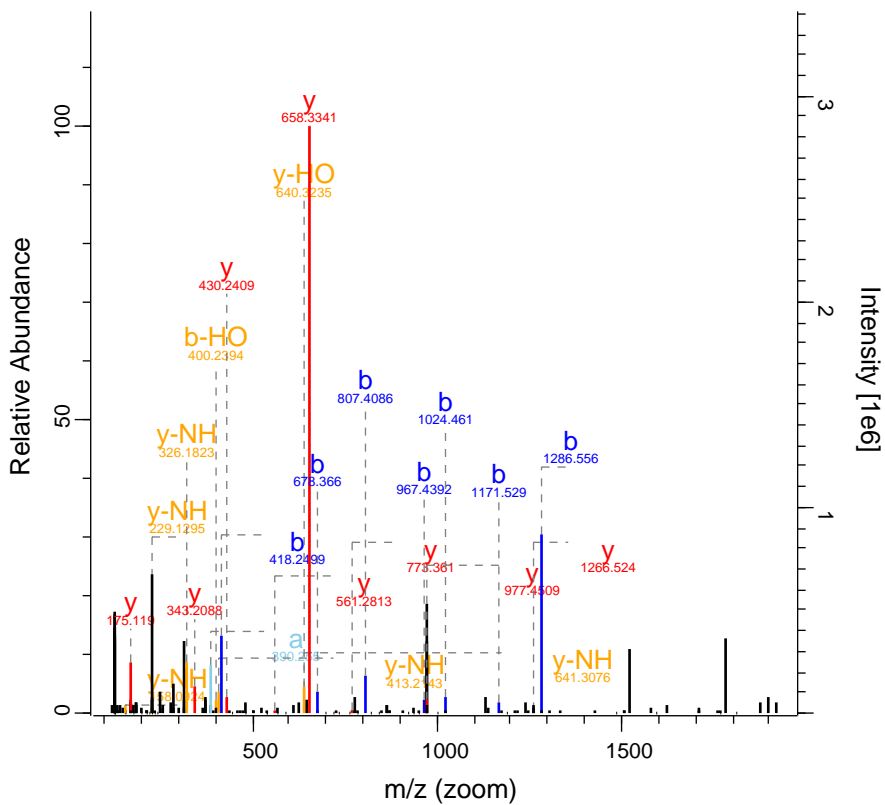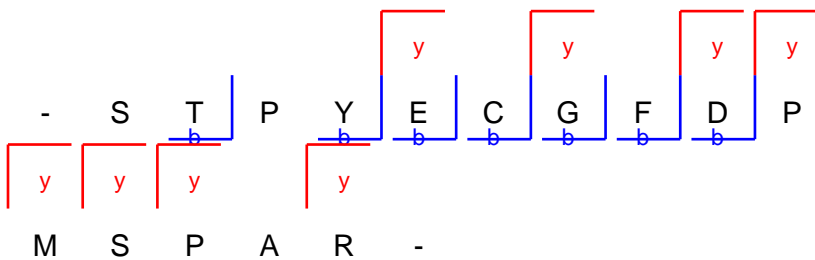



RO-QC-160121\_ZackD\_SS\_Set\_02\_Fraction 24038 FTMS; HC 77.22 648.63 MT-ND3

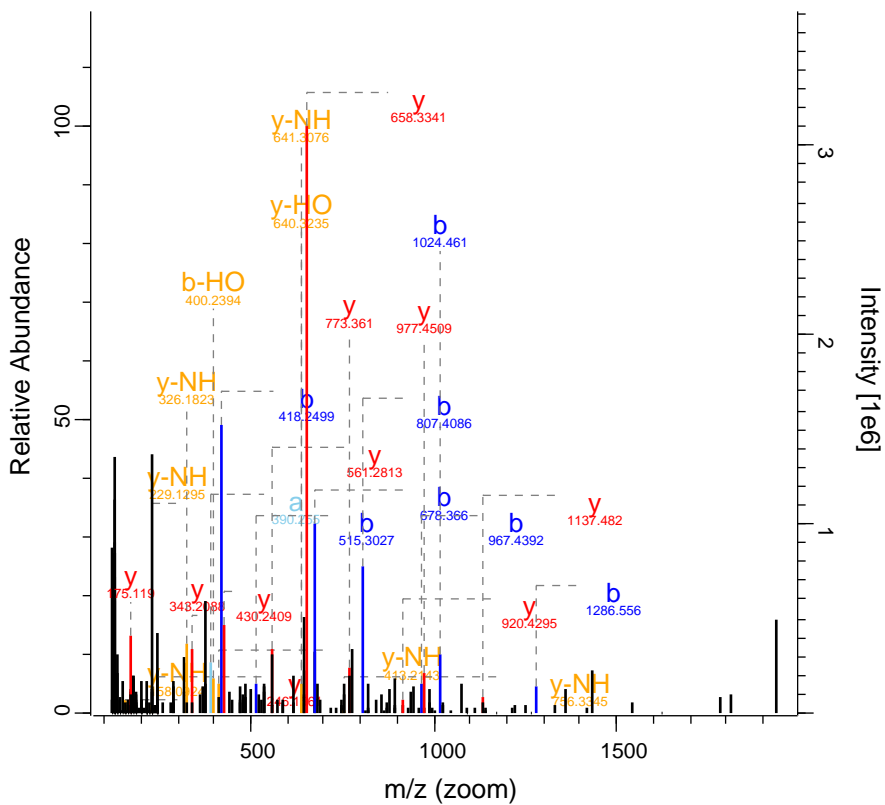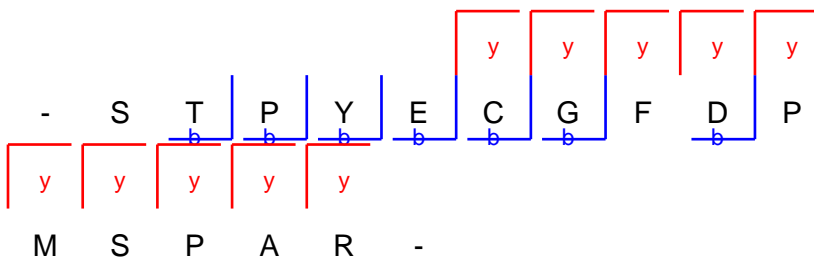

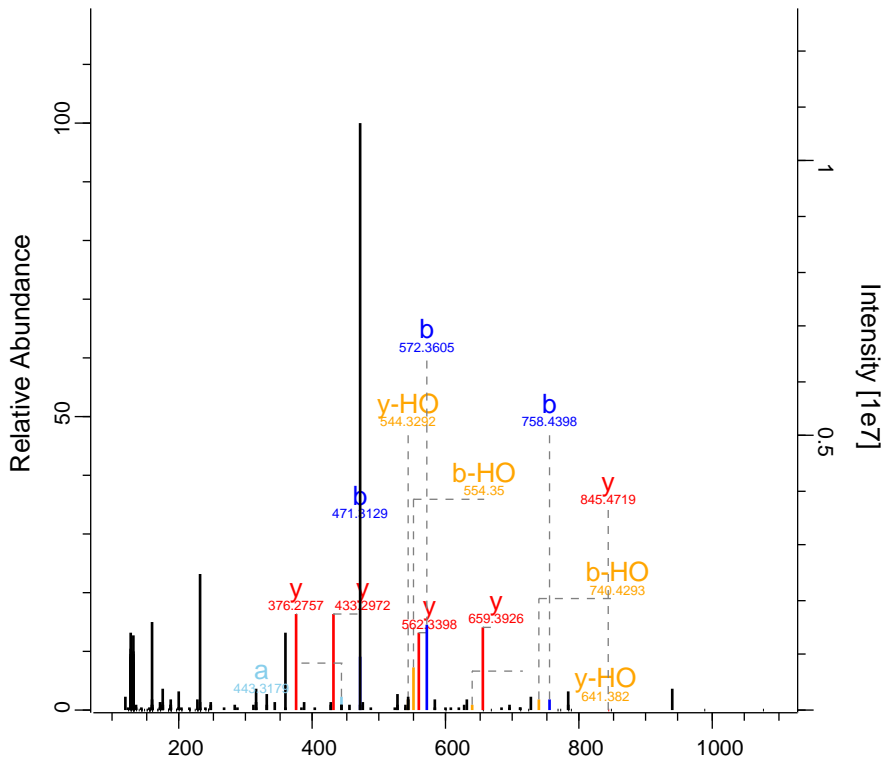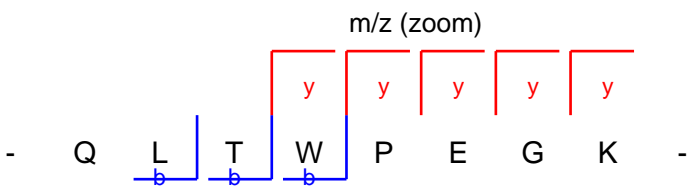

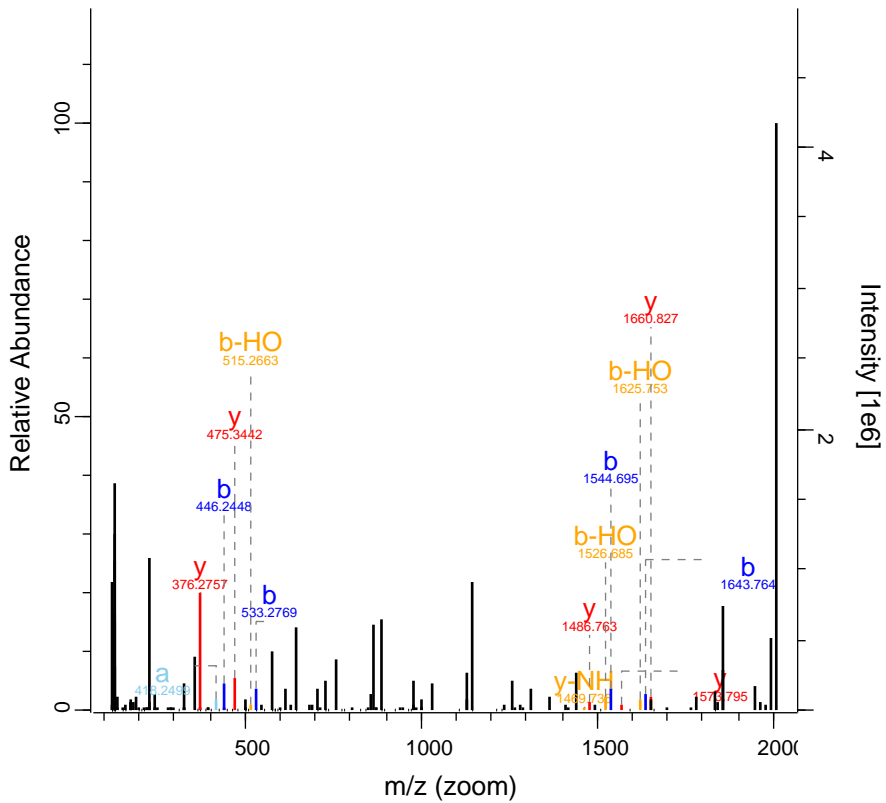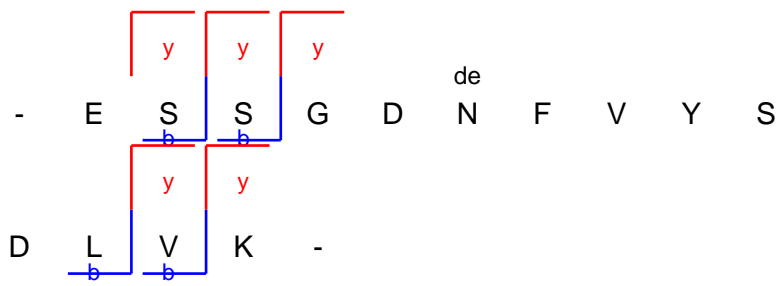

Raw File

Scan Method Score m/z

RO-QC-160121\_ZackD\_SS\_Set\_02\_Fraction\_10

26320 FTMS; HCD 56.05 494.79

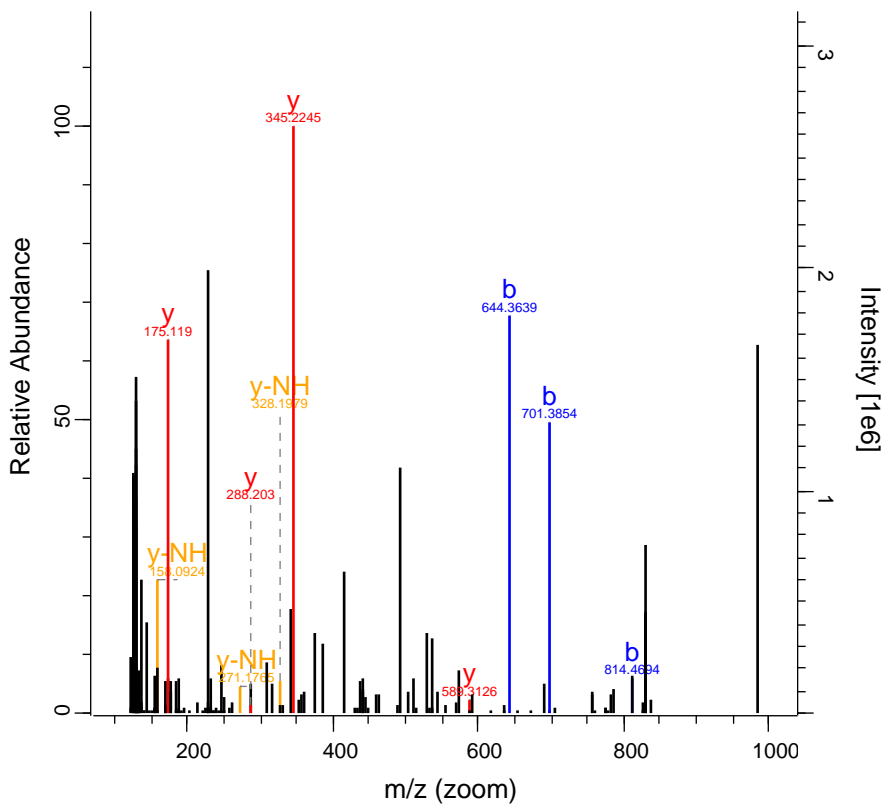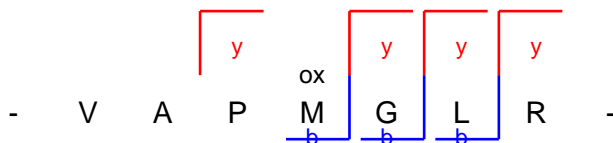

RO-QC-160121\_ZackD\_SS\_Set\_02\_Fraction 26395 FTMS; HC 61.62 818.78 LMO4

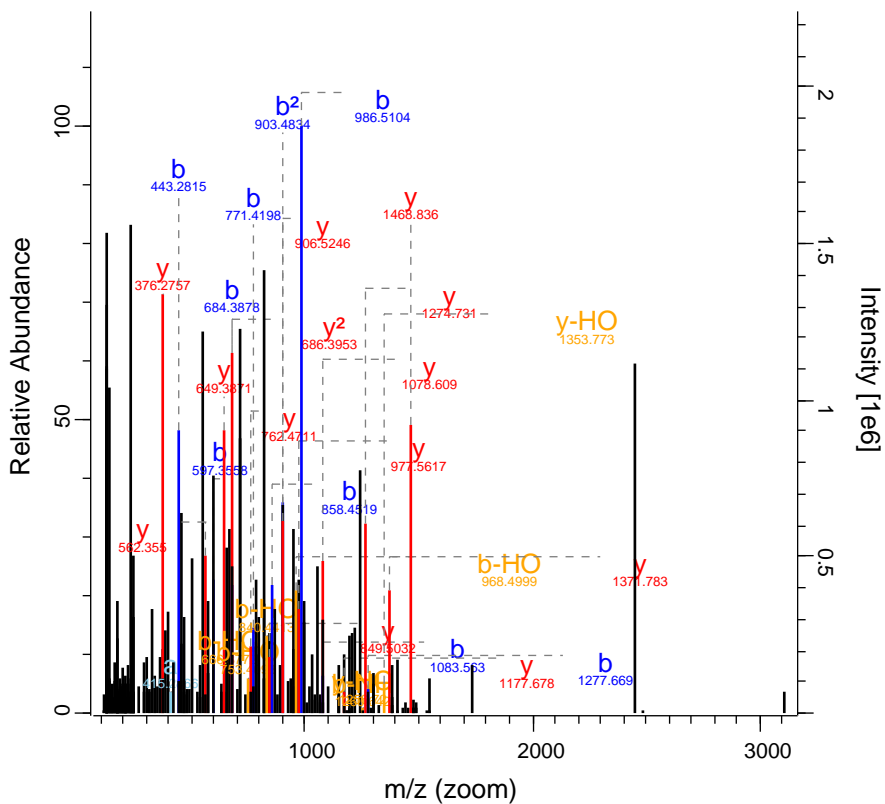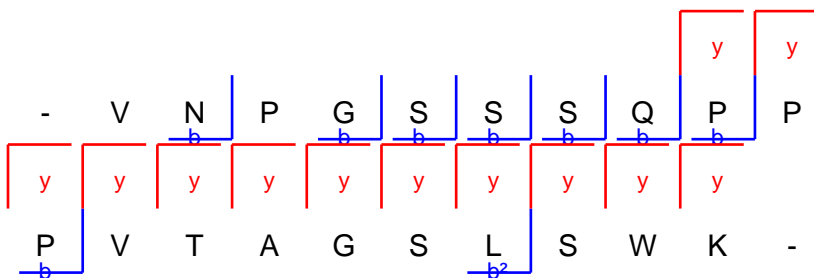

RO-QC-160121\_ZackD\_SS\_Set\_02\_Fraction 26779 FTMS; HC 46.43 464.28 RASGRF1

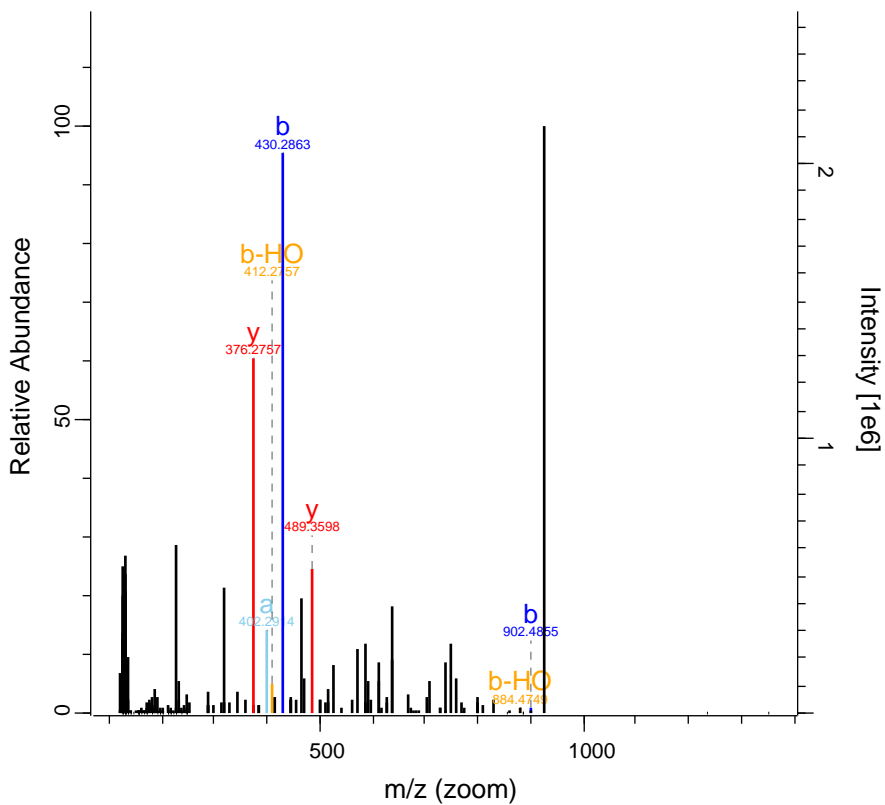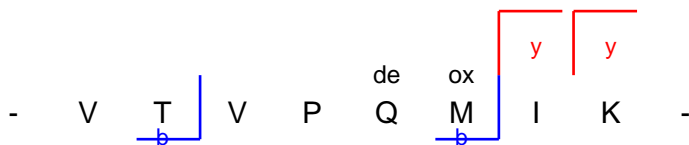

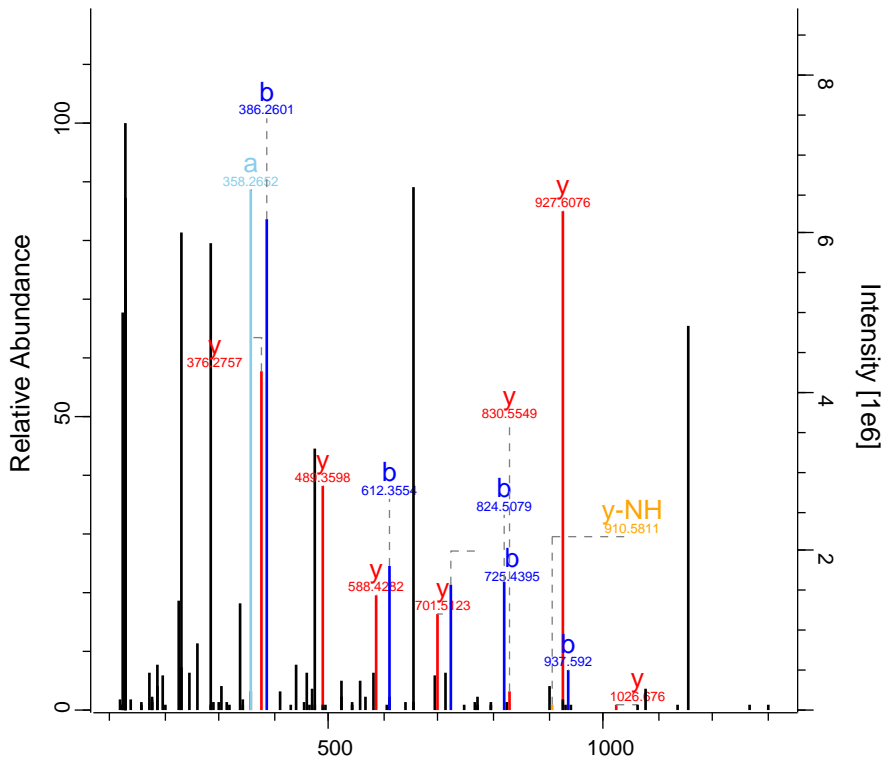

m/z (zoom)

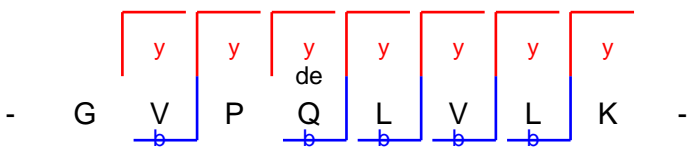

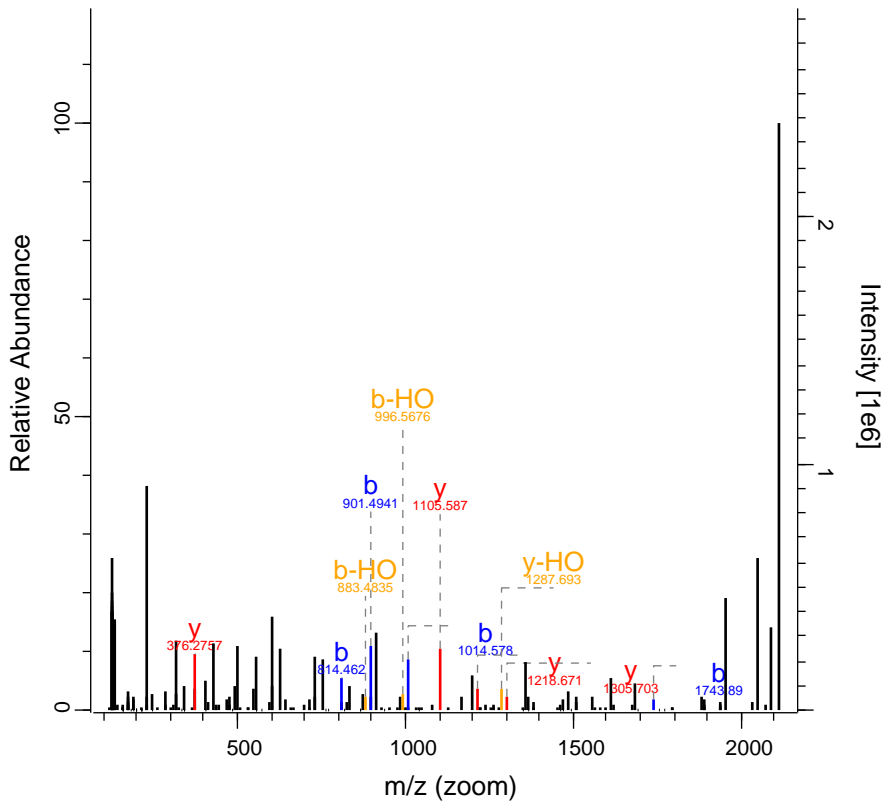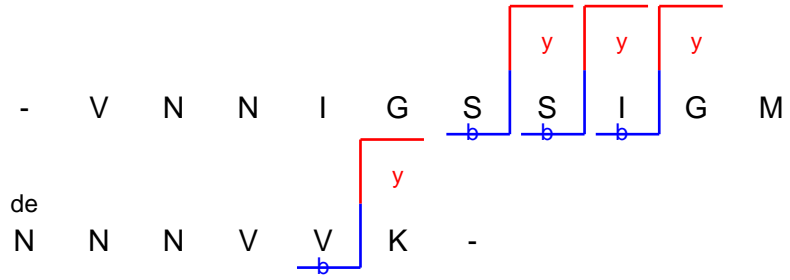



RO-QC-160121\_ZackD\_SS\_Set\_02\_Fraction\_10

28642 FTMS; HCD 53.17 727.9

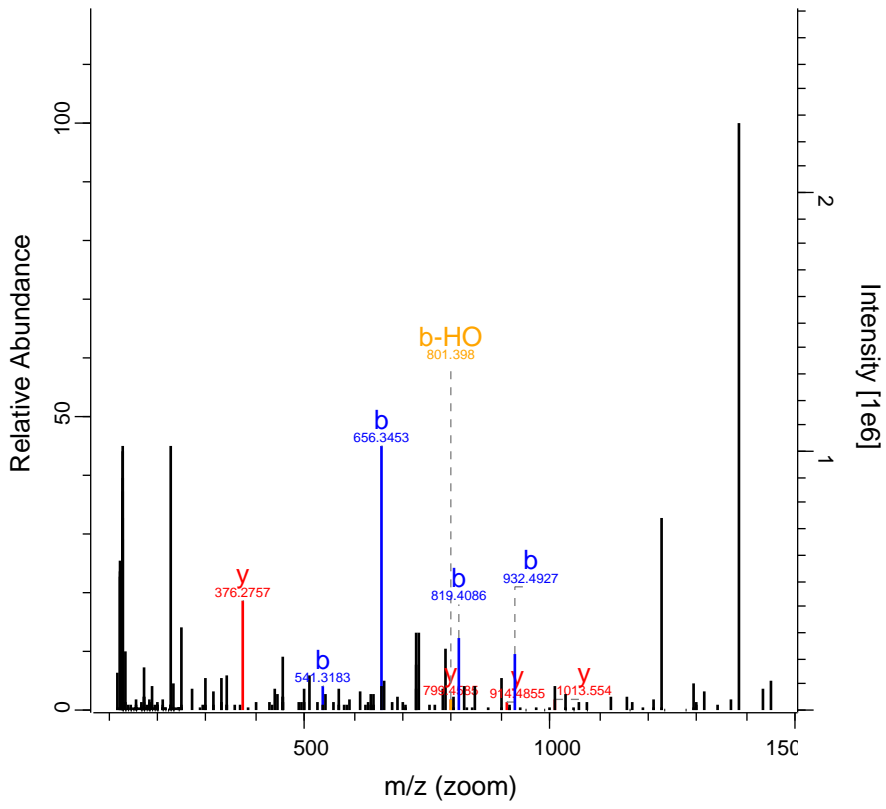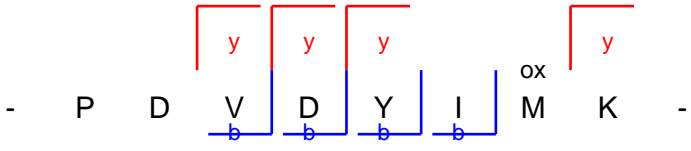

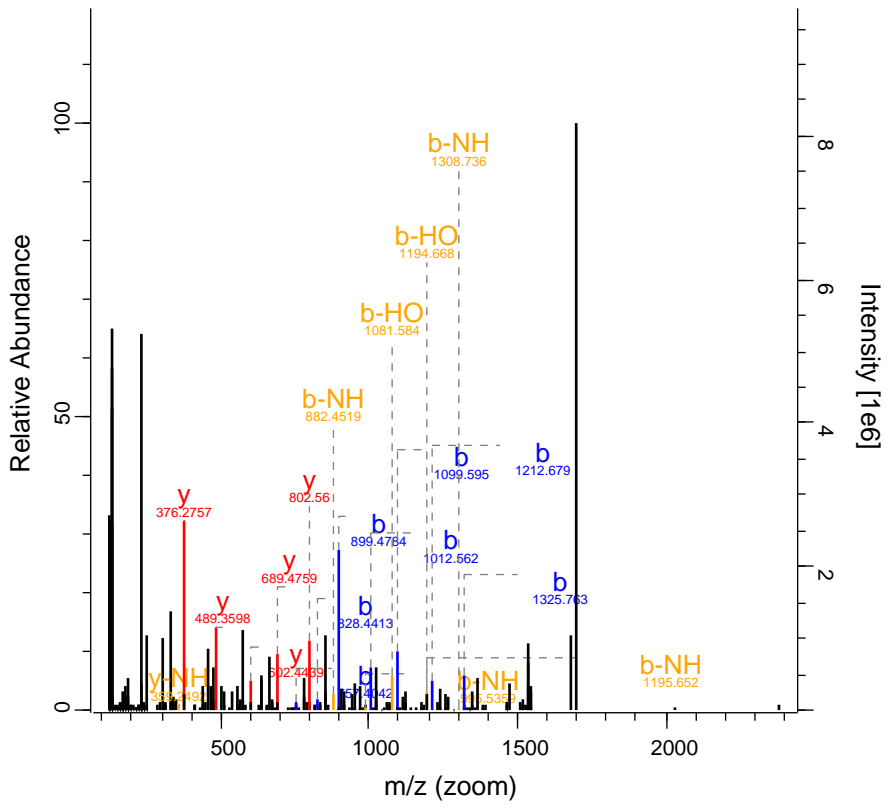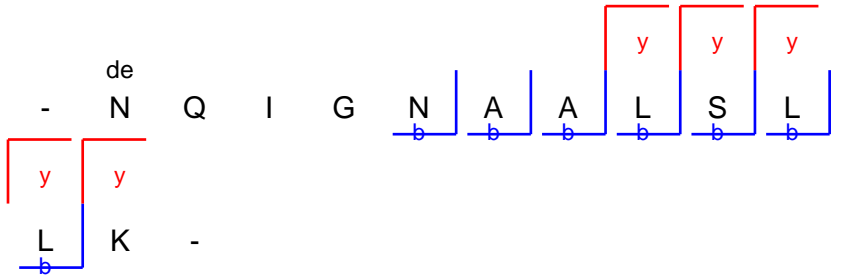

RO-QC-160121\_ZackD\_SS\_Set\_02\_Fraction 29120 FTMS; HC 53.87 558.67 ZNRF1

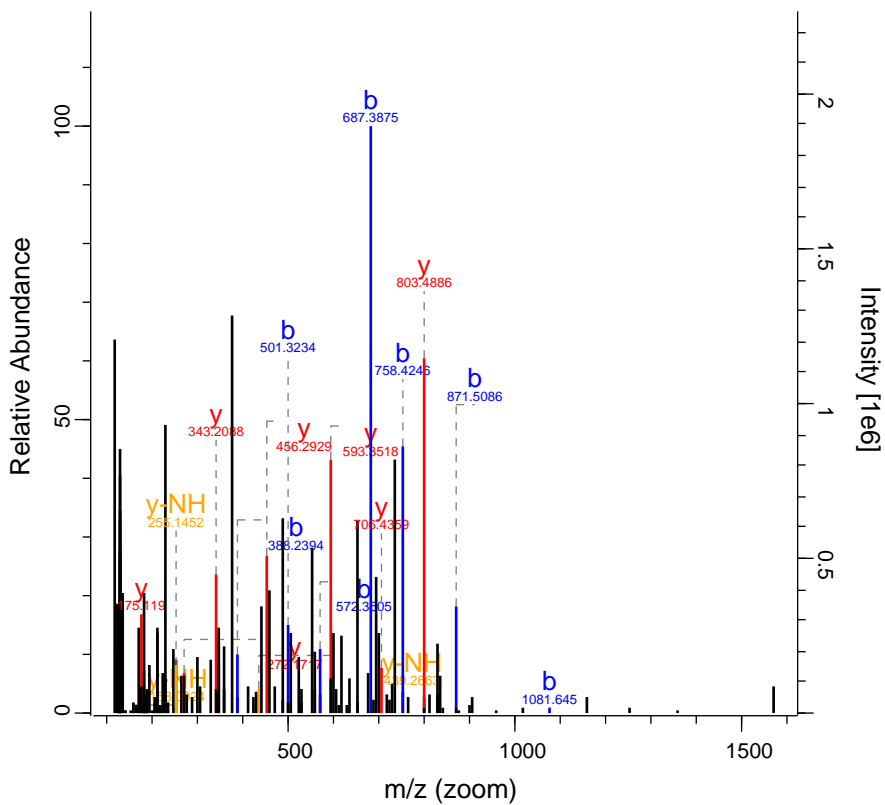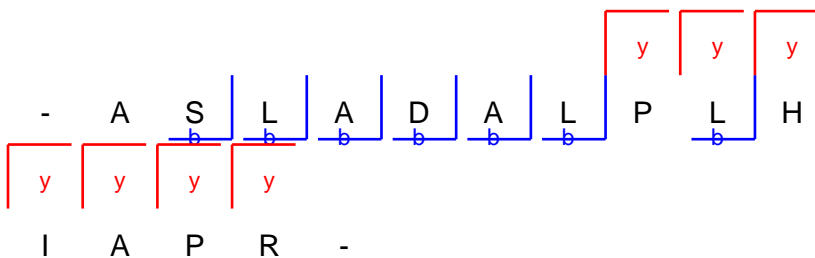

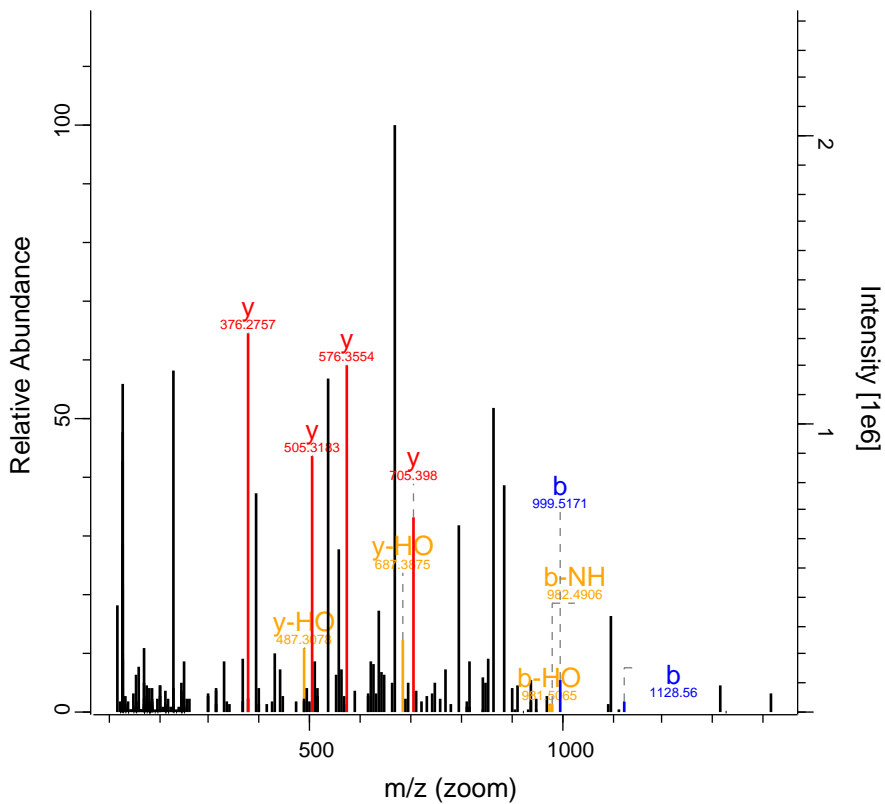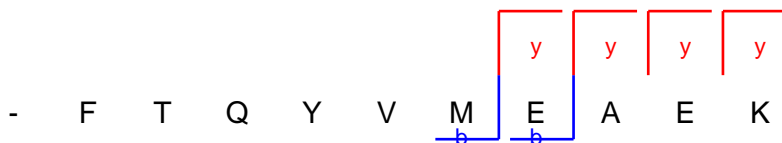

RO-QC-160121\_ZackD\_SS\_Set\_02\_Fraction 30492 FTMS; HC 109.44 619.99 METAP1D

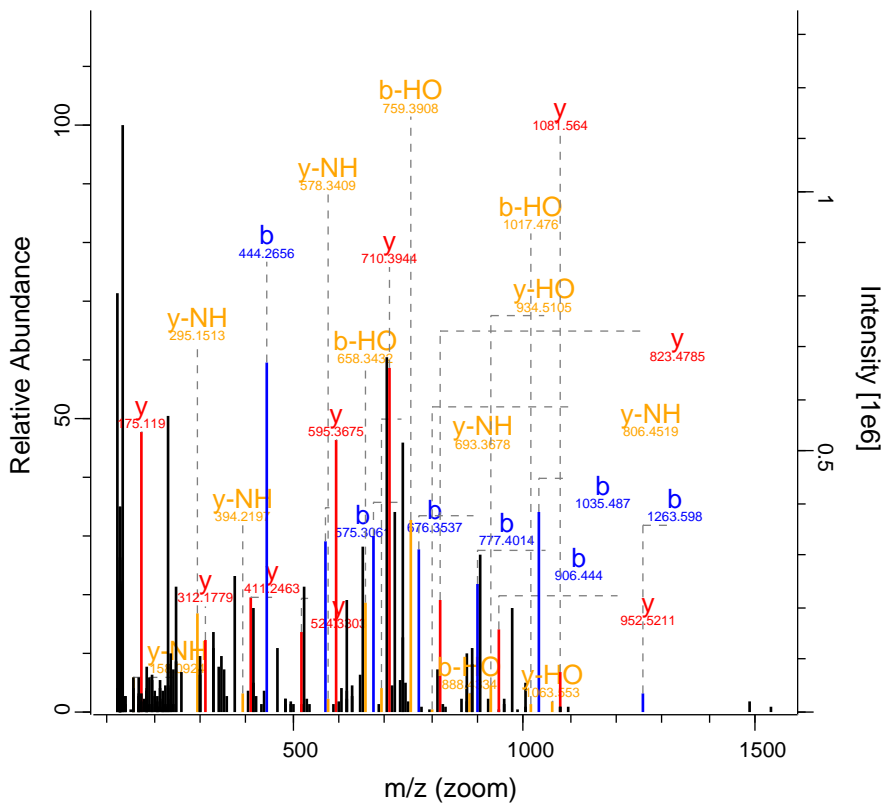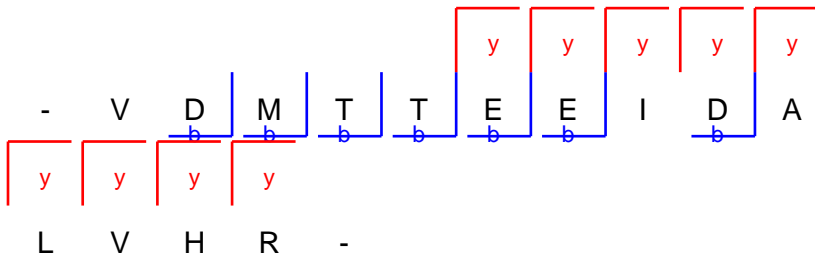



RO-QC-160121\_ZackD\_SS\_Set\_02\_Fratio 31388 FTMS; HC 175.29 1220.63 HN1

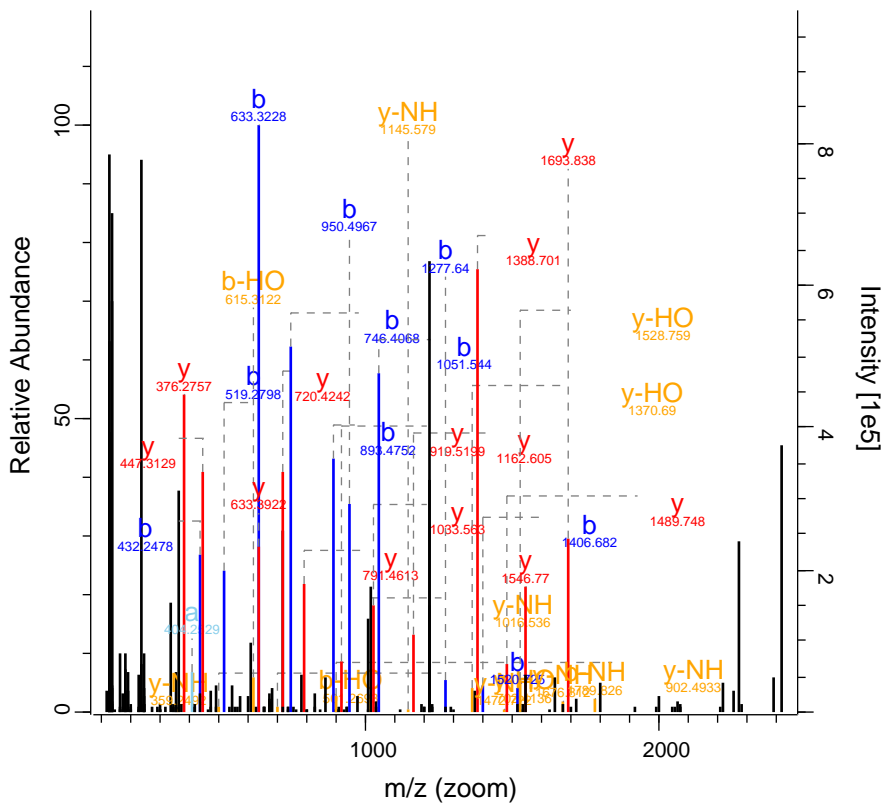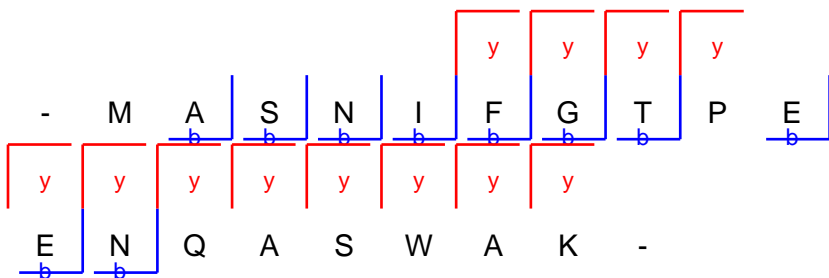

RO-QC-160121\_ZackD\_SS\_Set\_02\_Fraction 32041 FTMS; HC 50.12 978.51 ARHGAP22

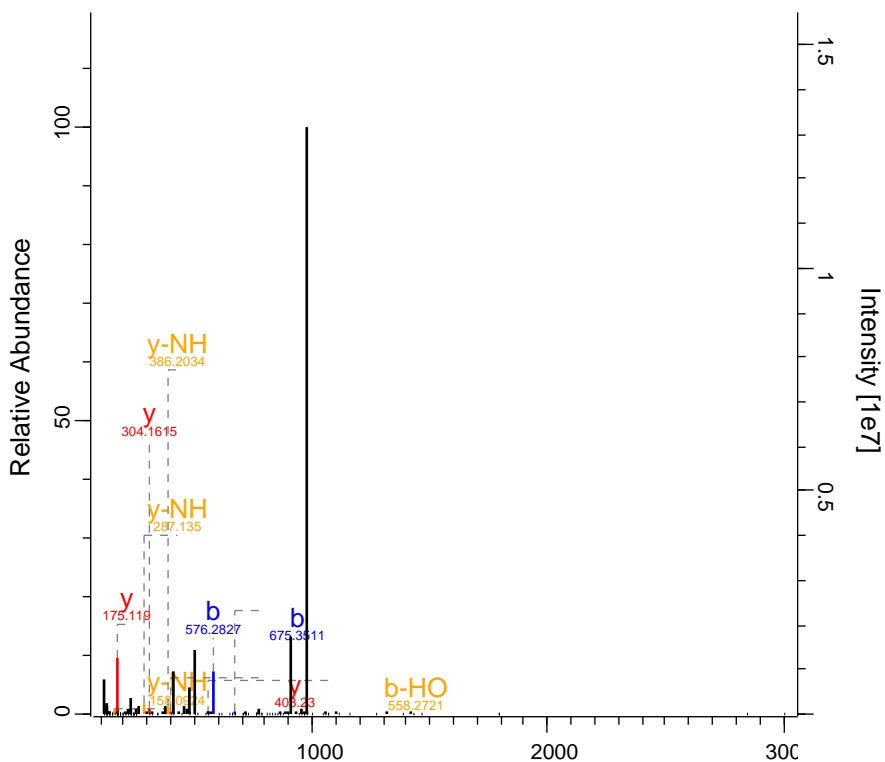

m/z (zoom)

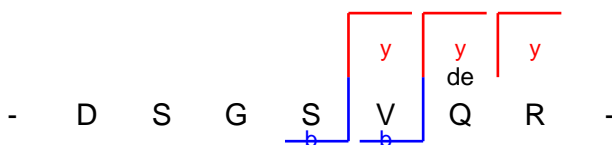



RO-QC-160121\_ZackD\_SS\_Set\_02\_Fraction 32206 FTMS; HC 71.45 508.64 PNLDC1

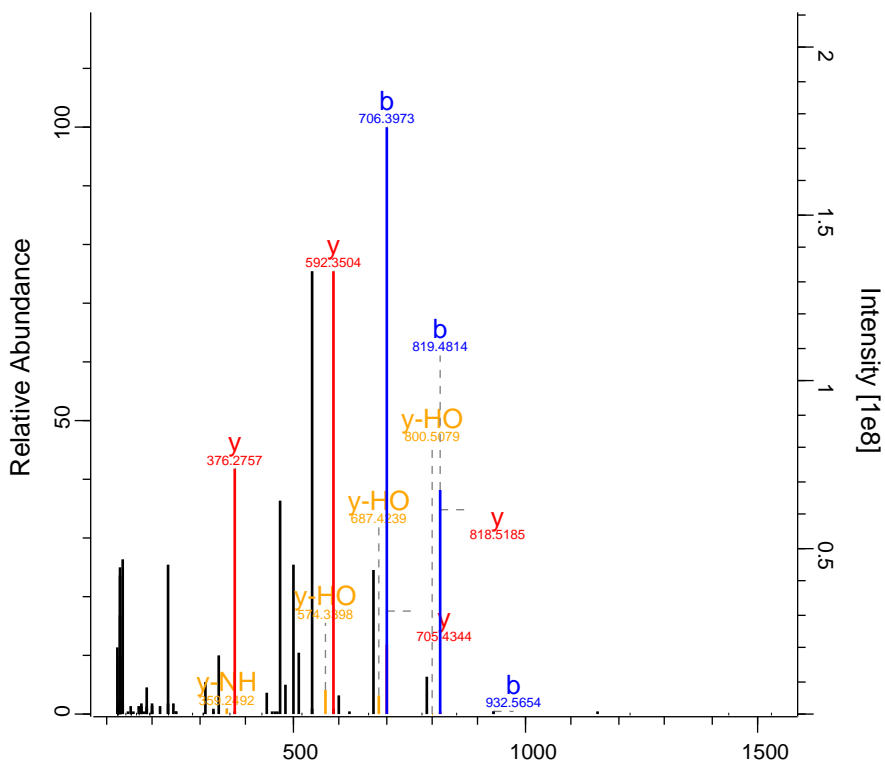

m/z (zoom)

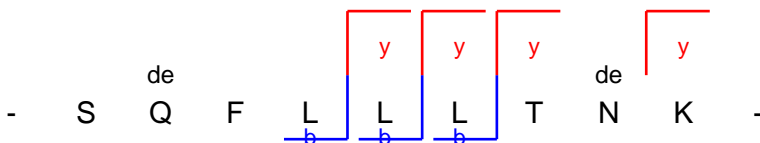

RO-QC-160121\_ZackD\_SS\_Set\_02\_Fraction 32306 FTMS; HC 87.36 515.29 PQLC2

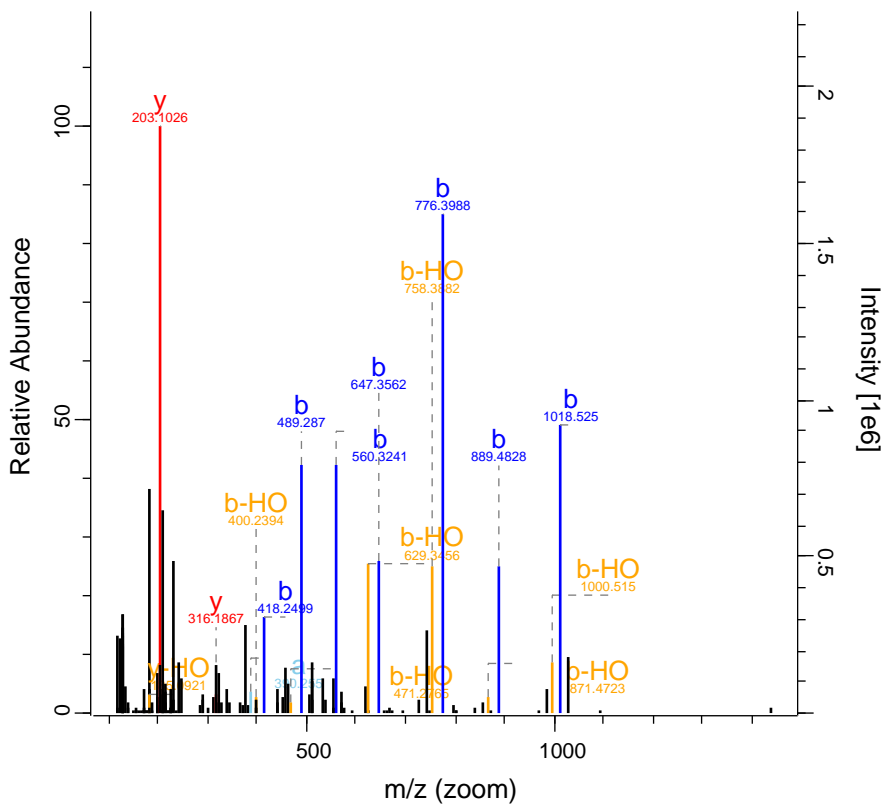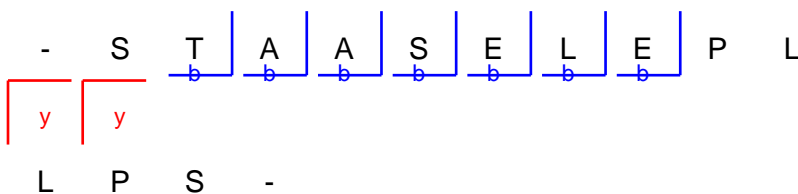

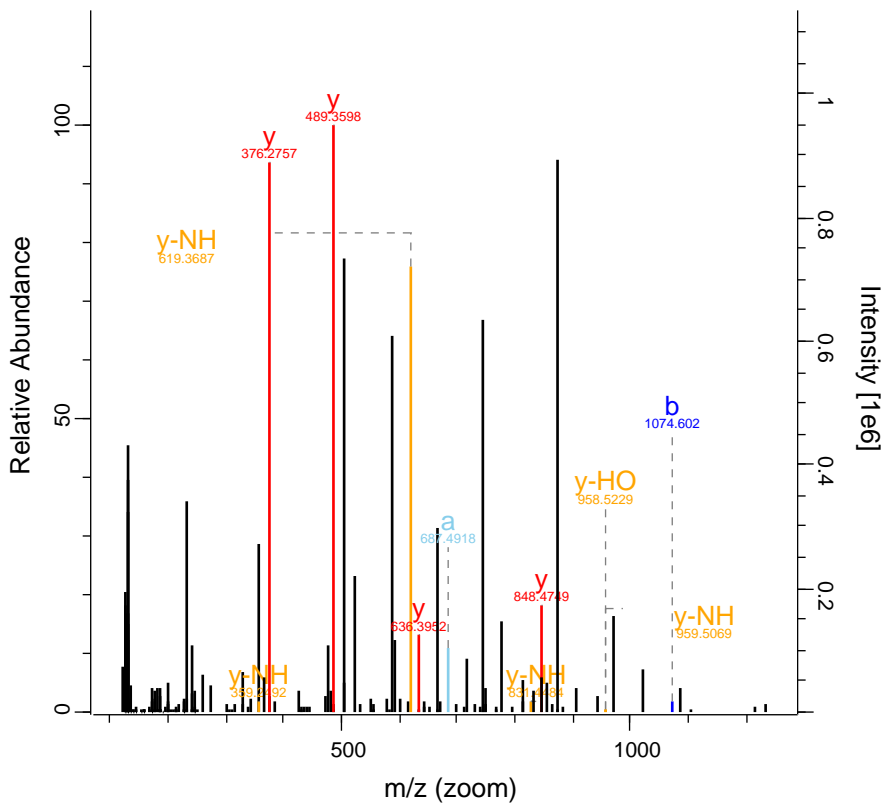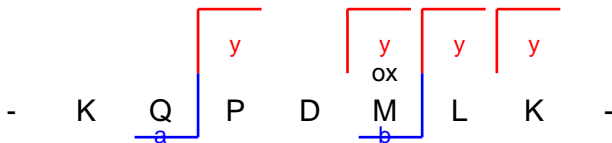

RO-QC-160121\_ZackD\_SS\_Set\_02\_Fraction 35510 FTMS; HC 43.53 814.42 CCDC7

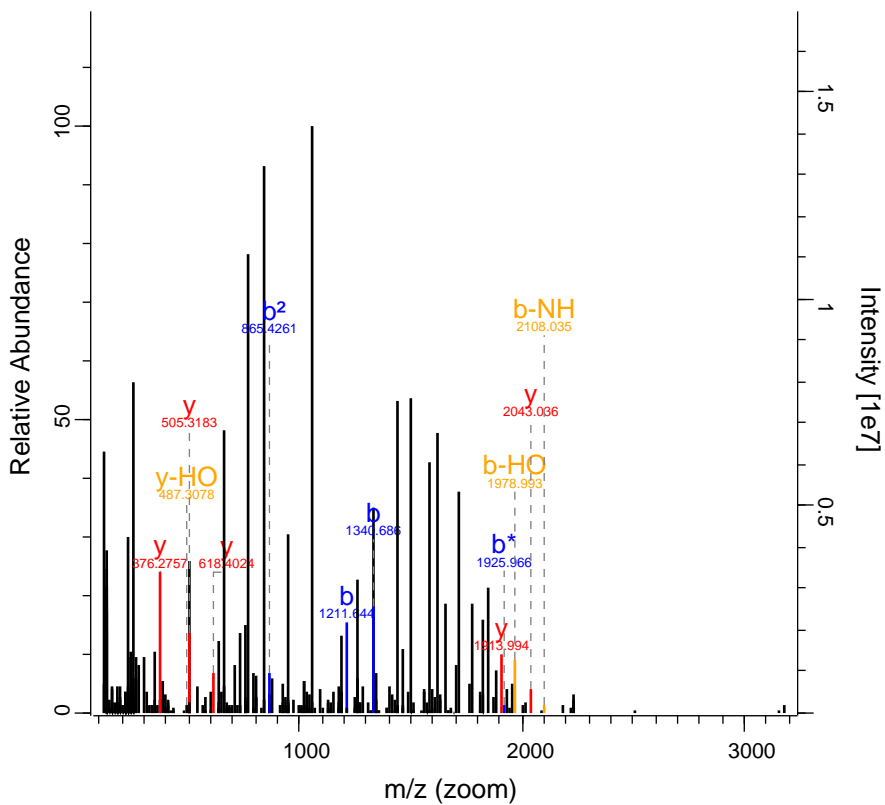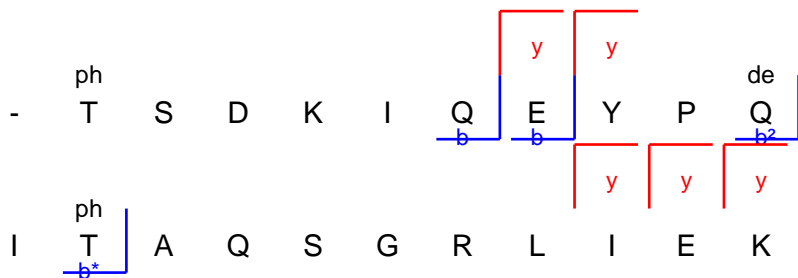



RO-QC-160121\_ZackD\_SS\_Set\_02\_Fractio 37365 FTMS; HC 202.62 1045.73 FAM174A

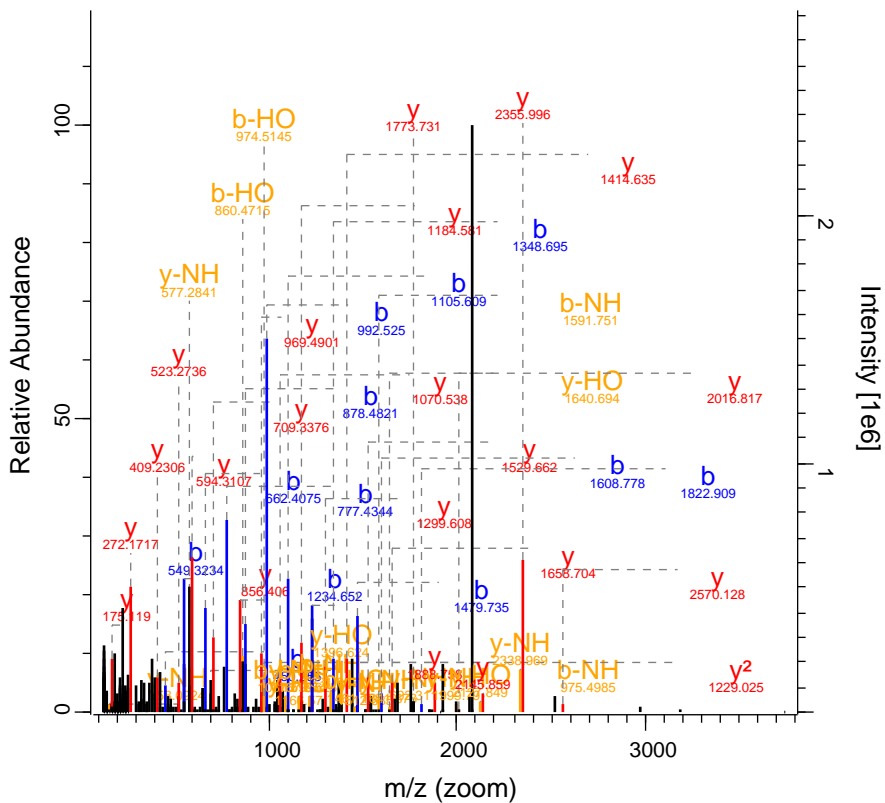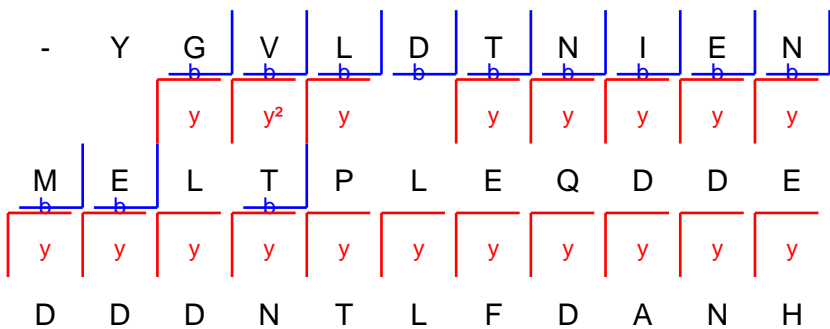

RO-QC-160121\_ZackD\_SS\_Set\_02\_Fraction 37982 FTMS; HC 87.15 618.02 OR4E1

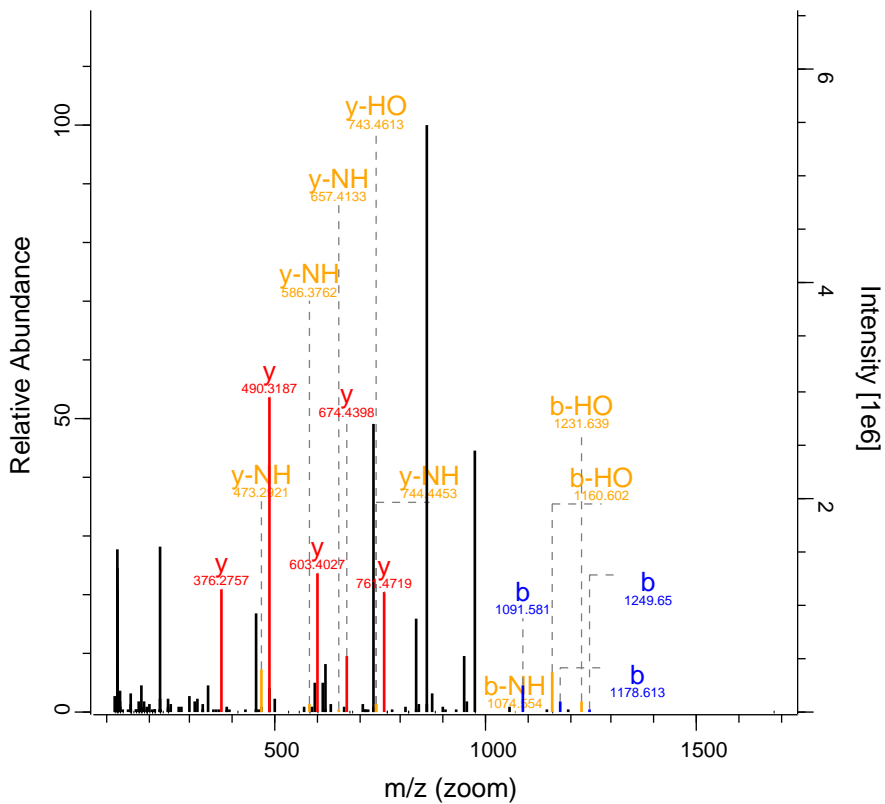

de

-

N

E

E

M

K

y

S

y

A

y

L

y

N

y

K

-





RO-QC-160121\_ZackD\_SS\_Set\_02\_Fraction 39599 FTMS; HC 56.12 1440.69 TCF7L1

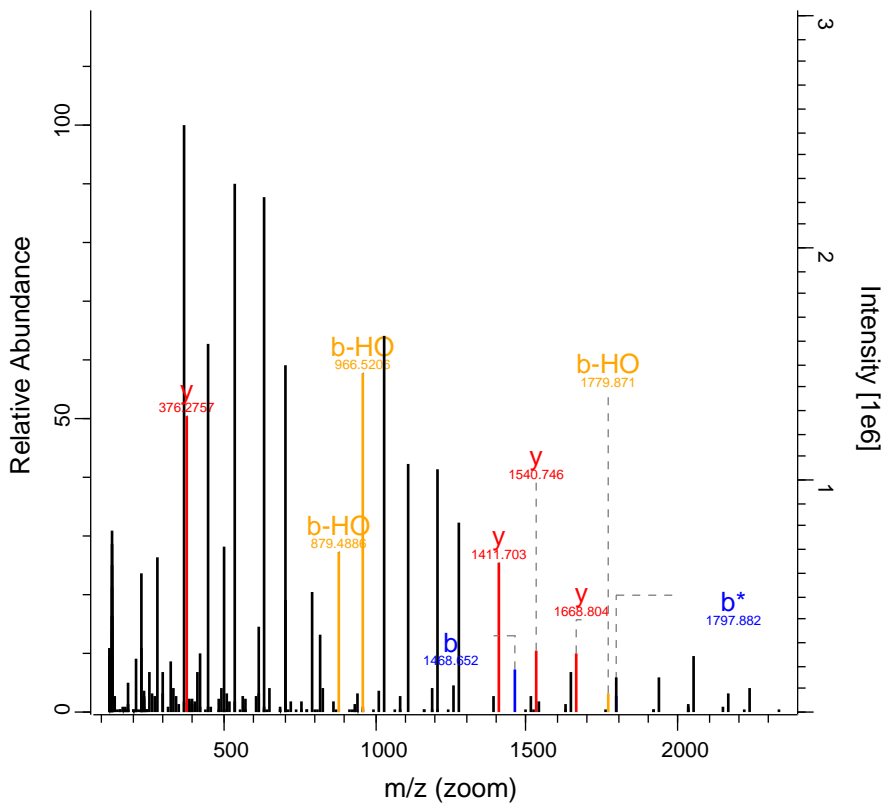

RO-QC-160121\_ZackD\_SS\_Set\_02\_Fraction 39692 FTMS; HC 85.74 835.11 BSCL2

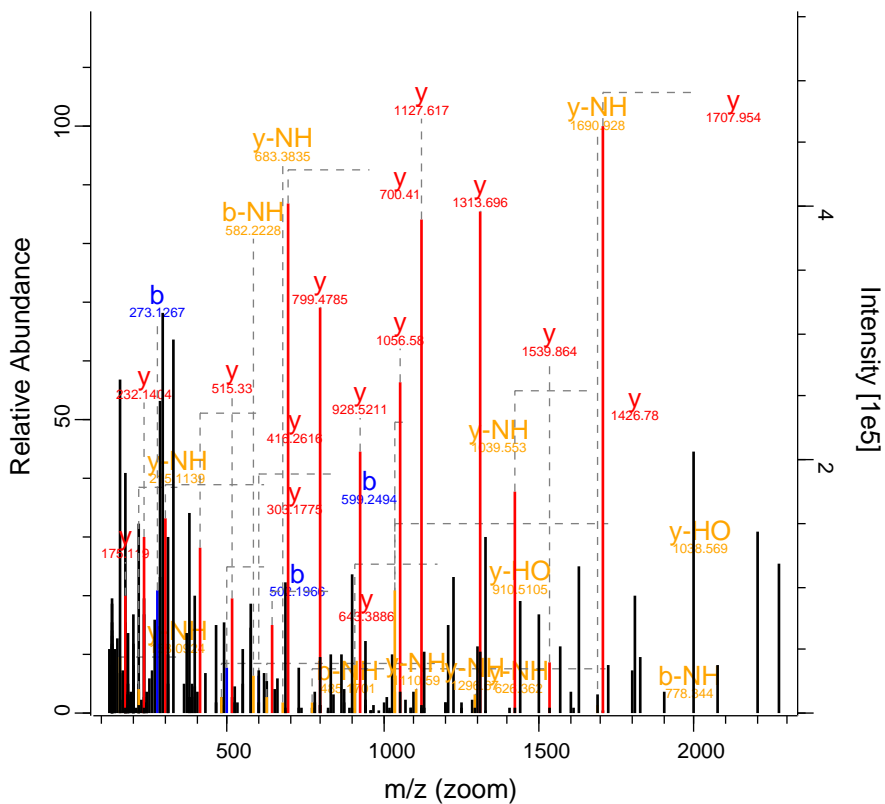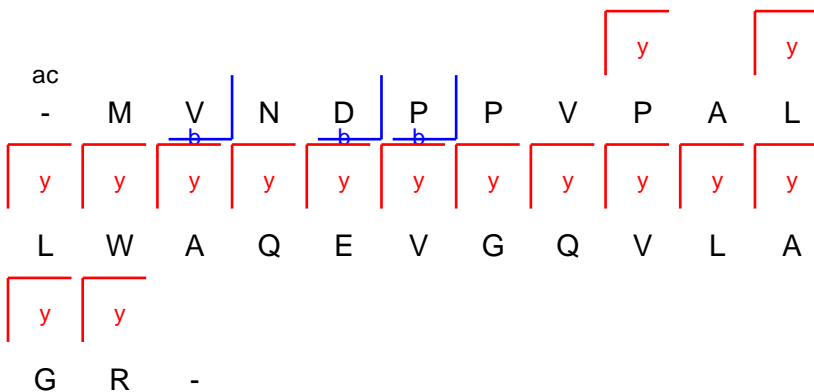

RO-QC-160121\_ZackD\_SS\_Set\_02\_Fraction 39695 FTMS; HC 89.47 1252.17 BSCL2

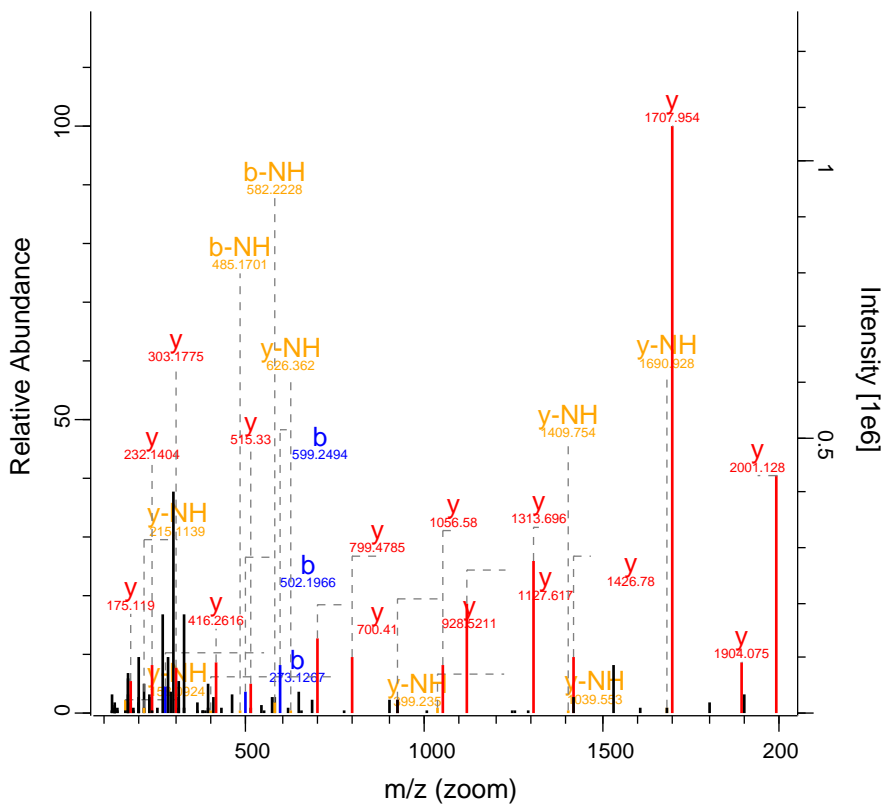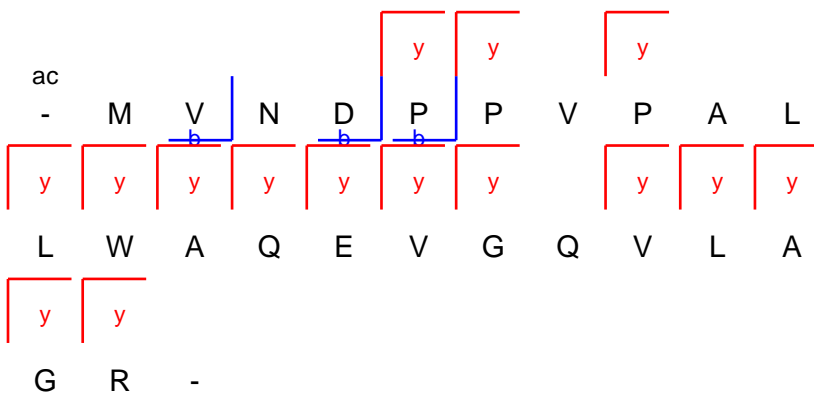

RO-QC-160121\_ZackD\_SS\_Set\_02\_Fraction 4789 FTMS; HC 168.05 619.29 ZBTB1

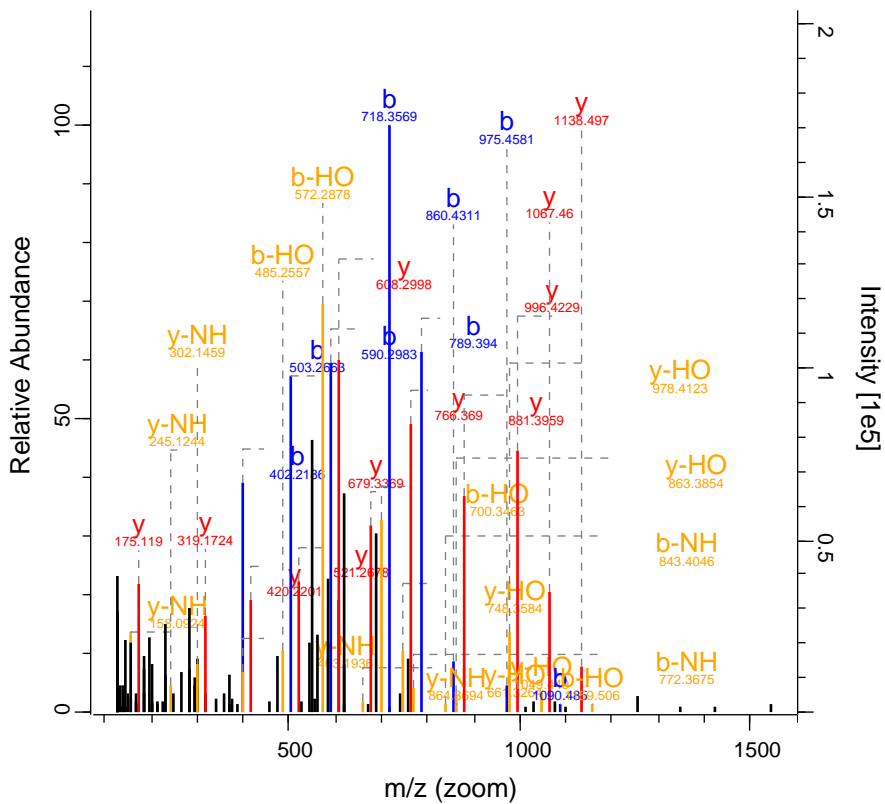

RO-QC-160121\_ZackD\_SS\_Set\_02\_Fraction 4790 FTMS; HC 99.53 928.43 ZBTB1

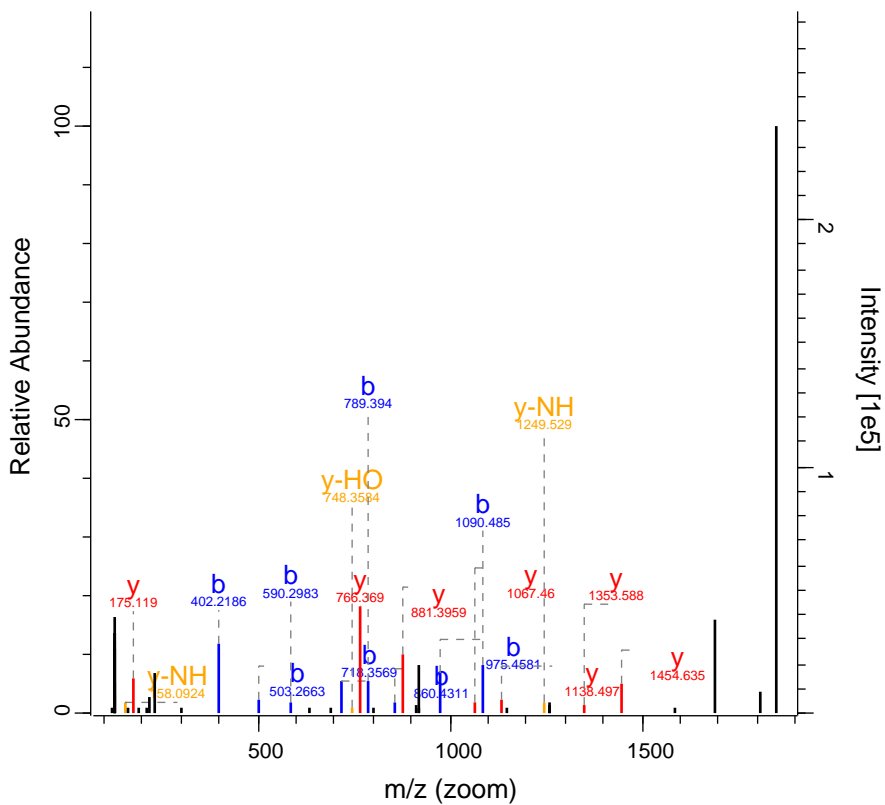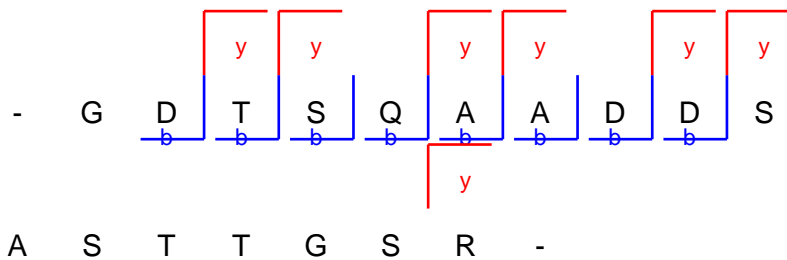

RO-QC-160121\_ZackD\_SS\_Set\_02\_Fraction 5332 FTMS; HC 70.1 390.47 UNC45B

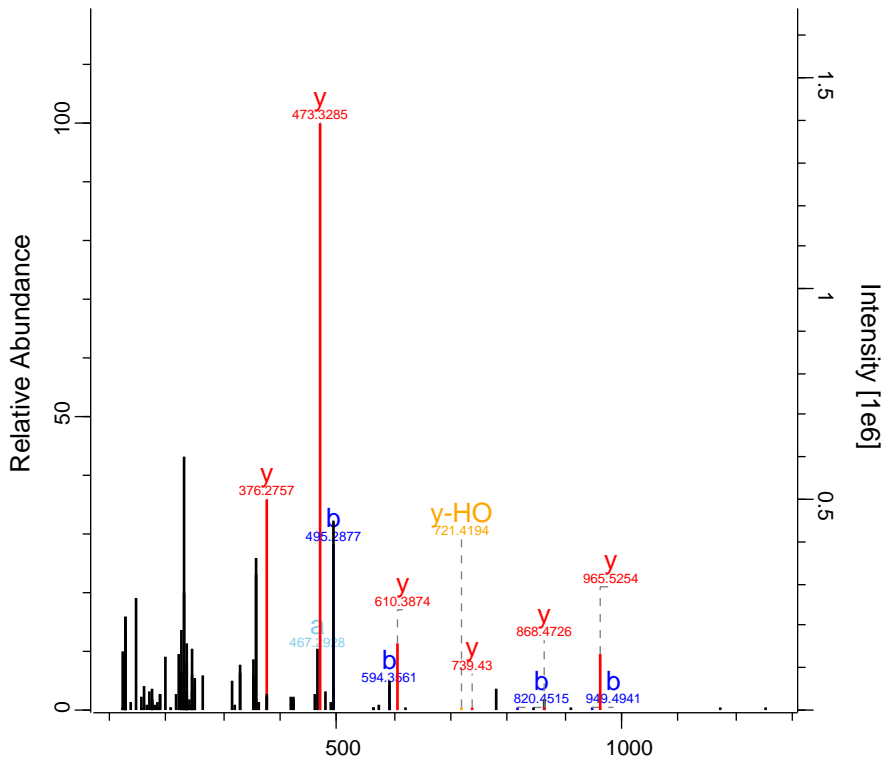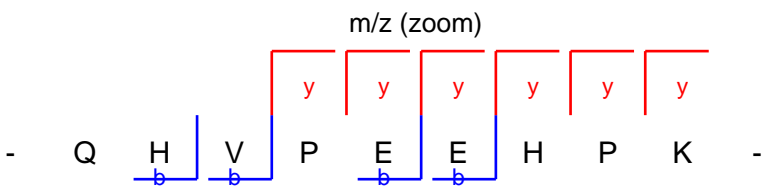

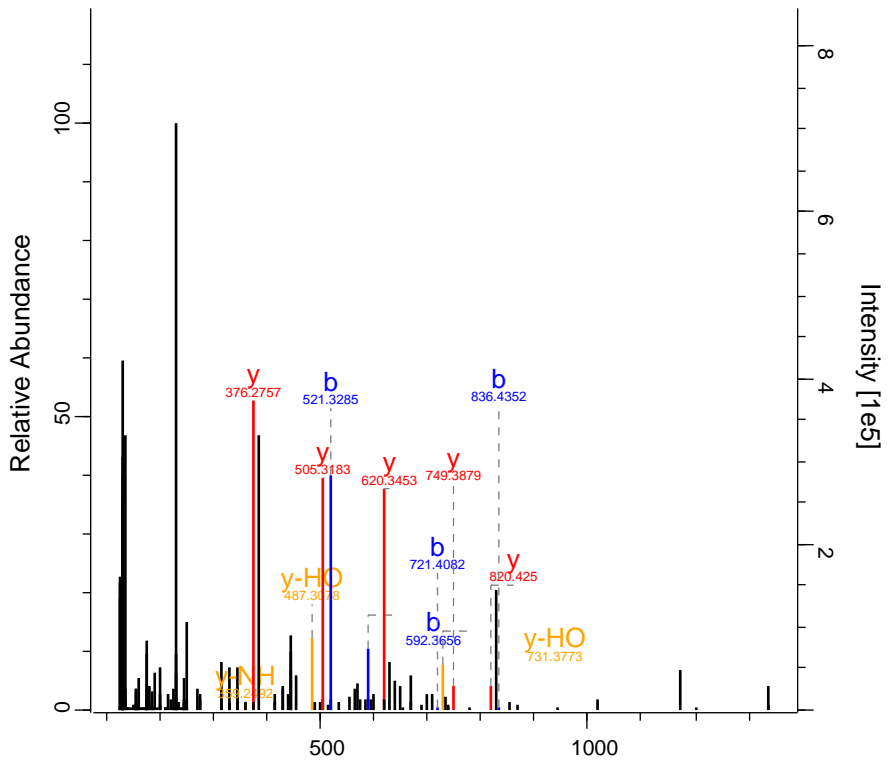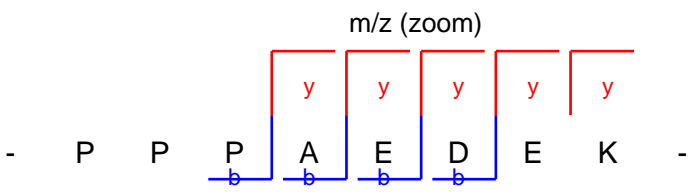

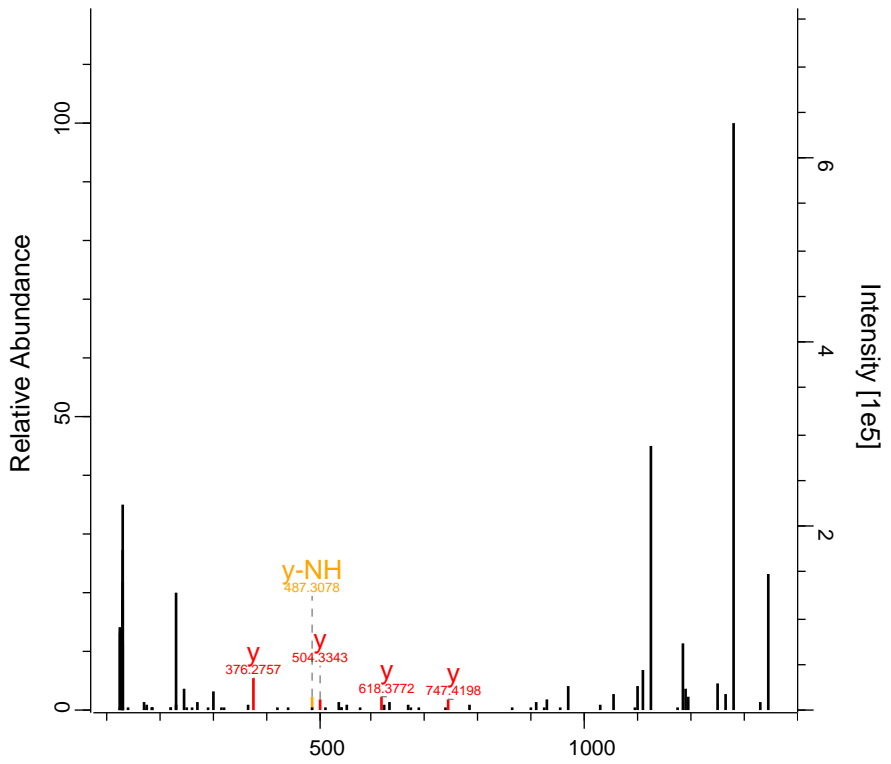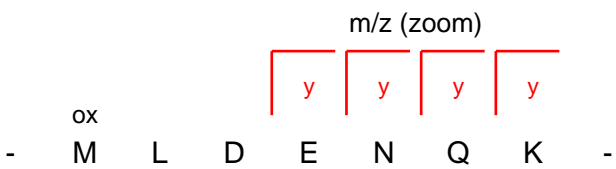



RO-QC-160121\_ZackD\_SS\_Set\_02\_Fraction 5641 FTMS; HC 56.23 506.04 MOSPD1

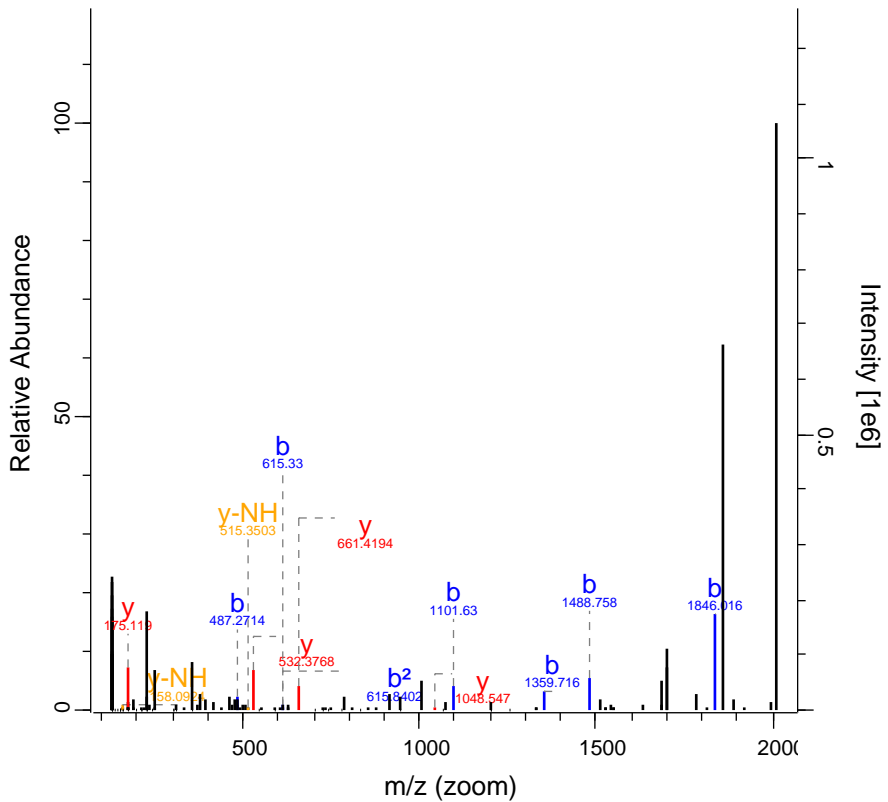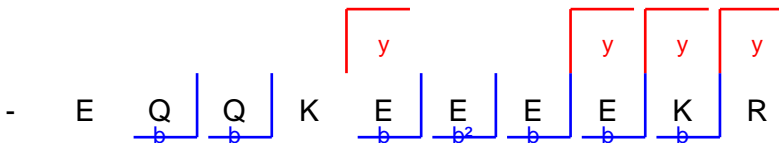

RO-QC-160121\_ZackD\_SS\_Set\_02\_Fraction 6126 FTMS; HC 71.35 510.94 ARHGAP39

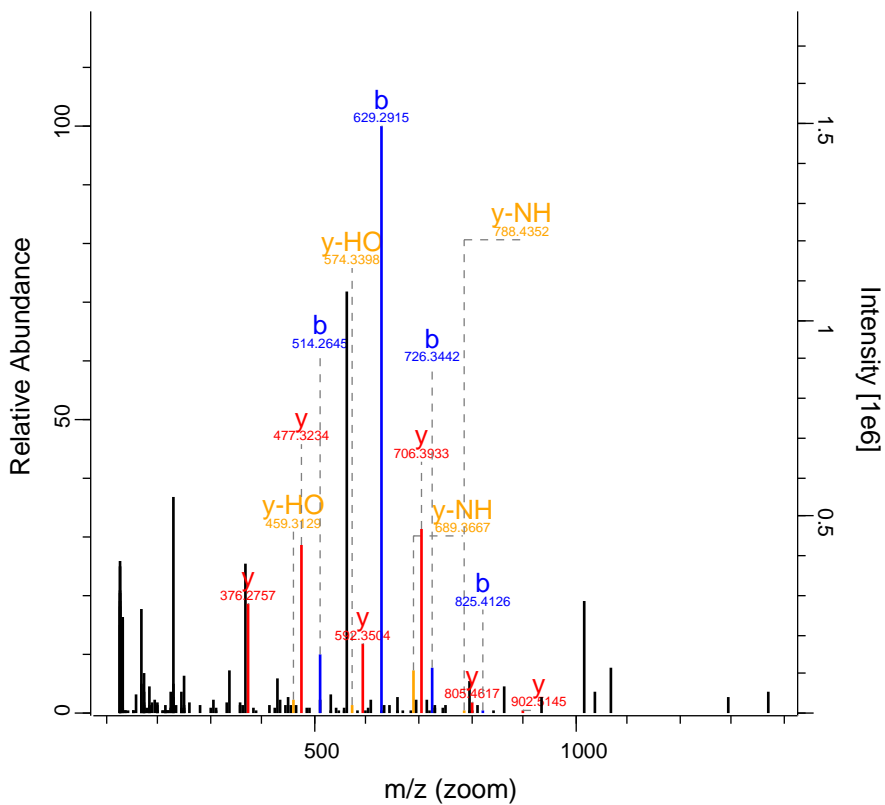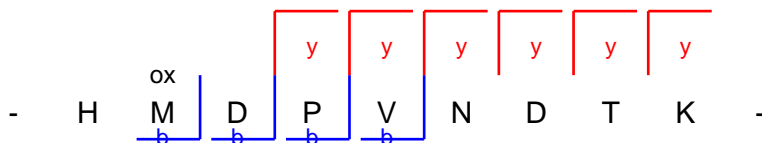

RO-QC-160121\_ZackD\_SS\_Set\_02\_Fraction 6160 FTMS; HC 78.12 560.95 TASP1

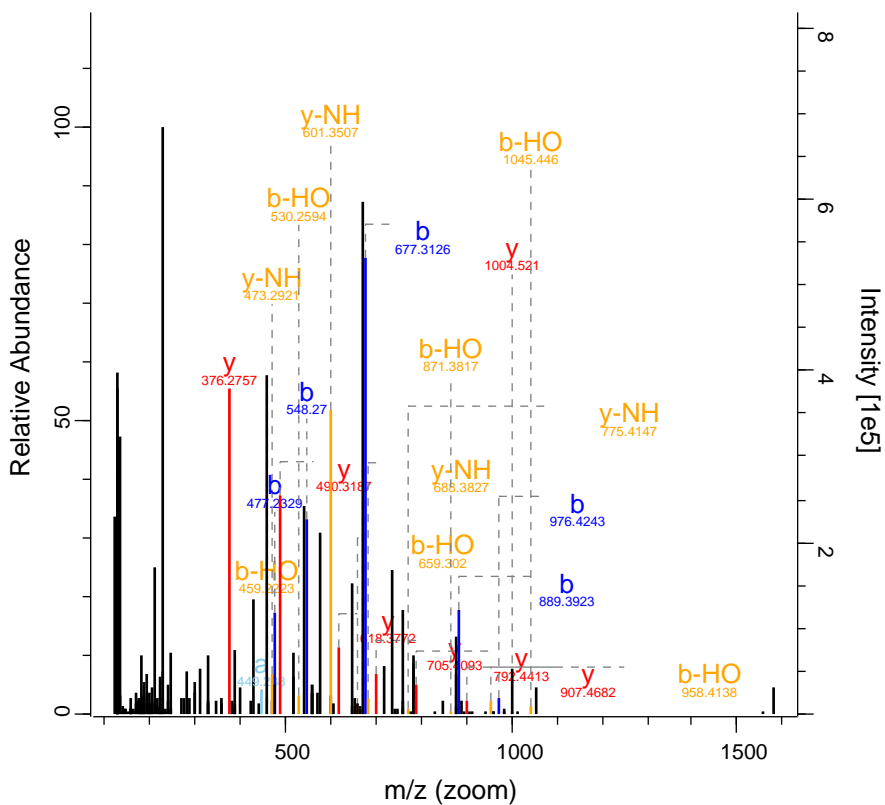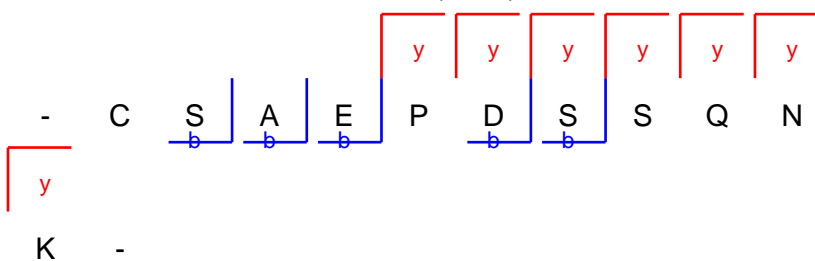

RO-QC-160121\_ZackD\_SS\_Set\_02\_Fraction 6172 FTMS; HC 56.73 841.42 TASP1

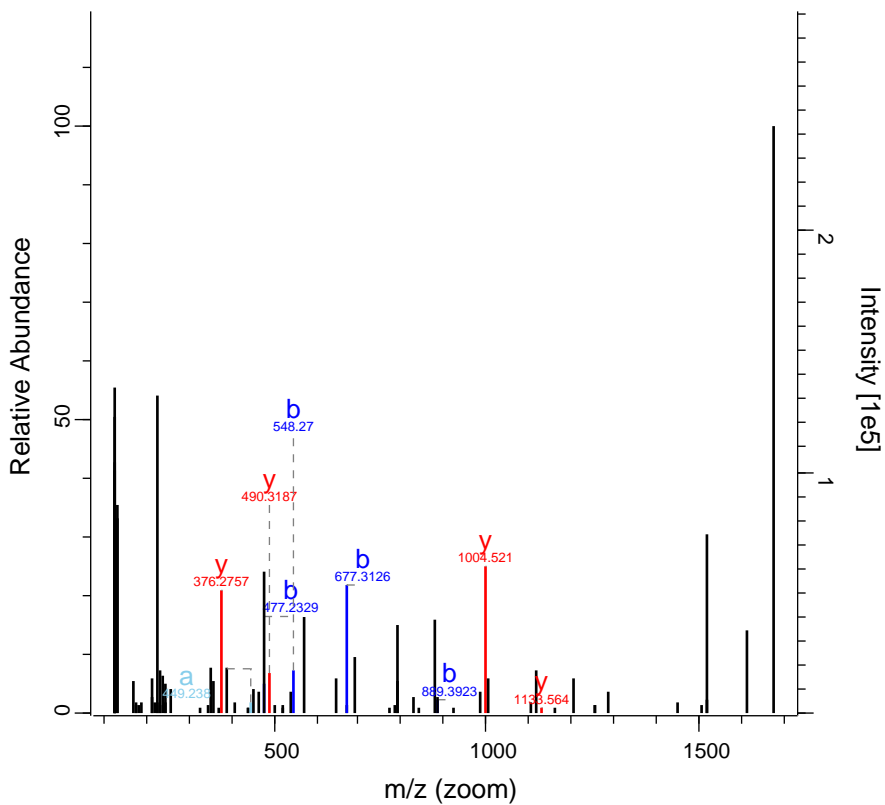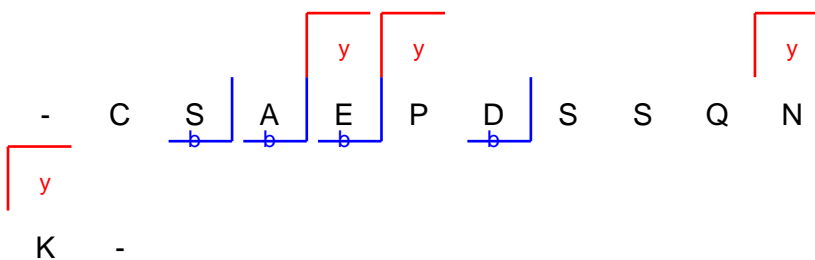

K -

RO-QC-160121\_ZackD\_SS\_Set\_02\_Fraction 6273 FTMS; HC 93.35 602.66 CCSAP

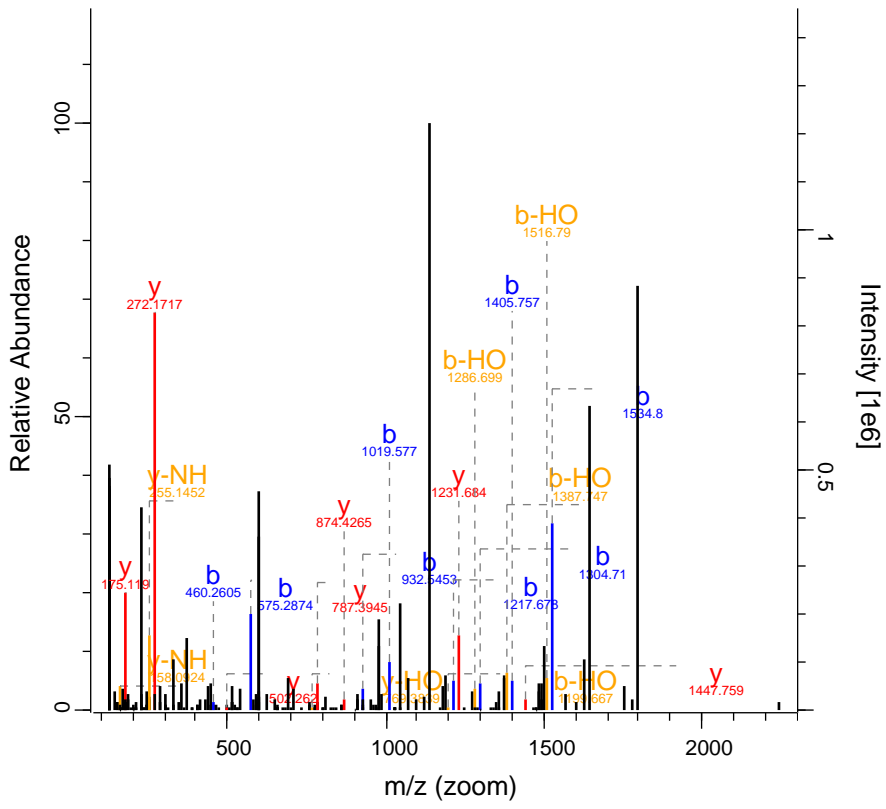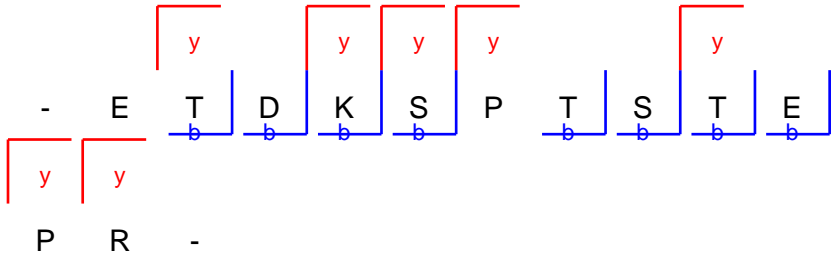

RO-QC-160121\_ZackD\_SS\_Set\_02\_Fraction 7171 FTMS; HC 134.75 780.89 GKAP1

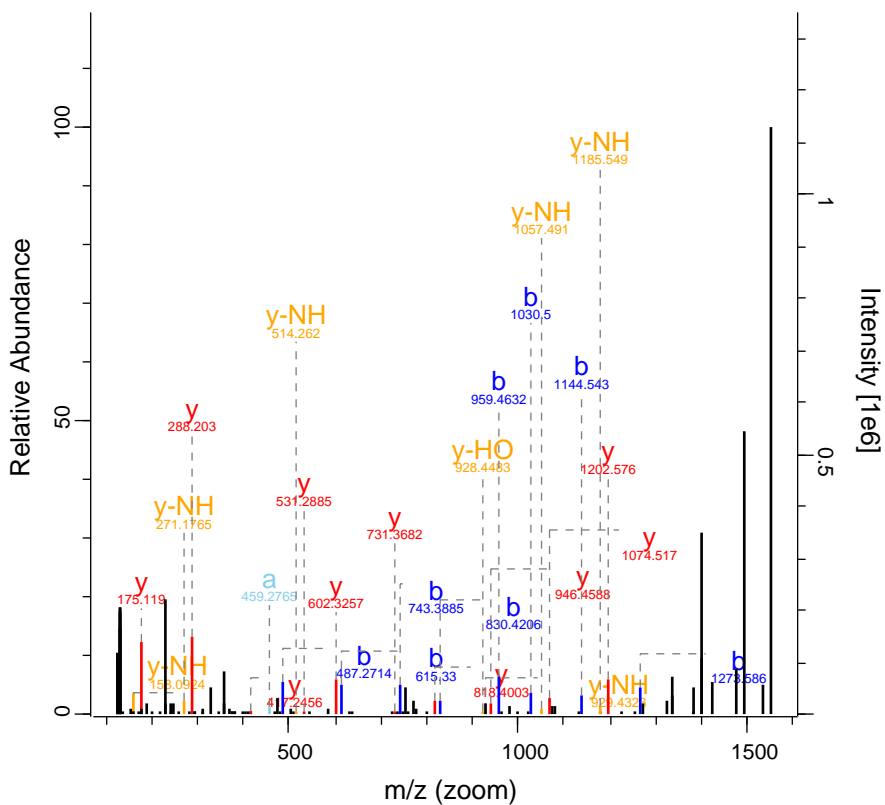

RO-QC-160121\_ZackD\_SS\_Set\_02\_Fraction 7413 FTMS; HC 91.08 704.83 TAB3

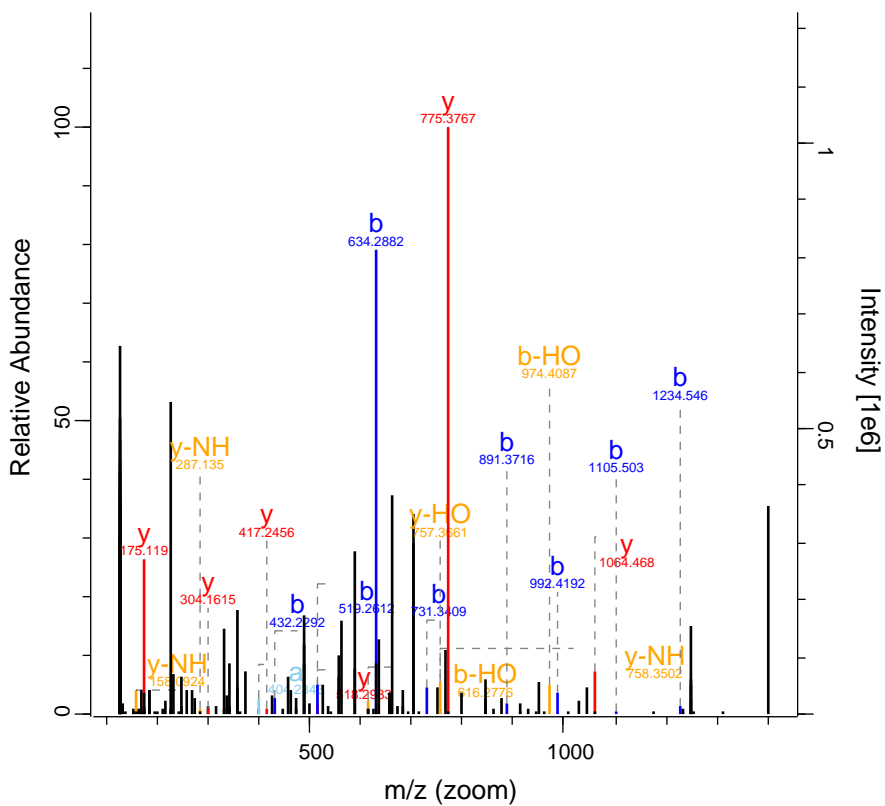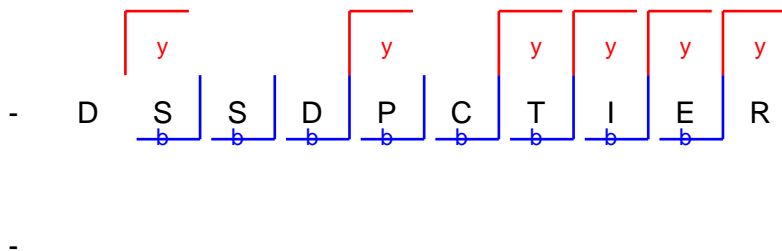

RO-QC-160121\_ZackD\_SS\_Set\_02\_Fraction 7510 FTMS; HC 72.23 694.34 MLF2

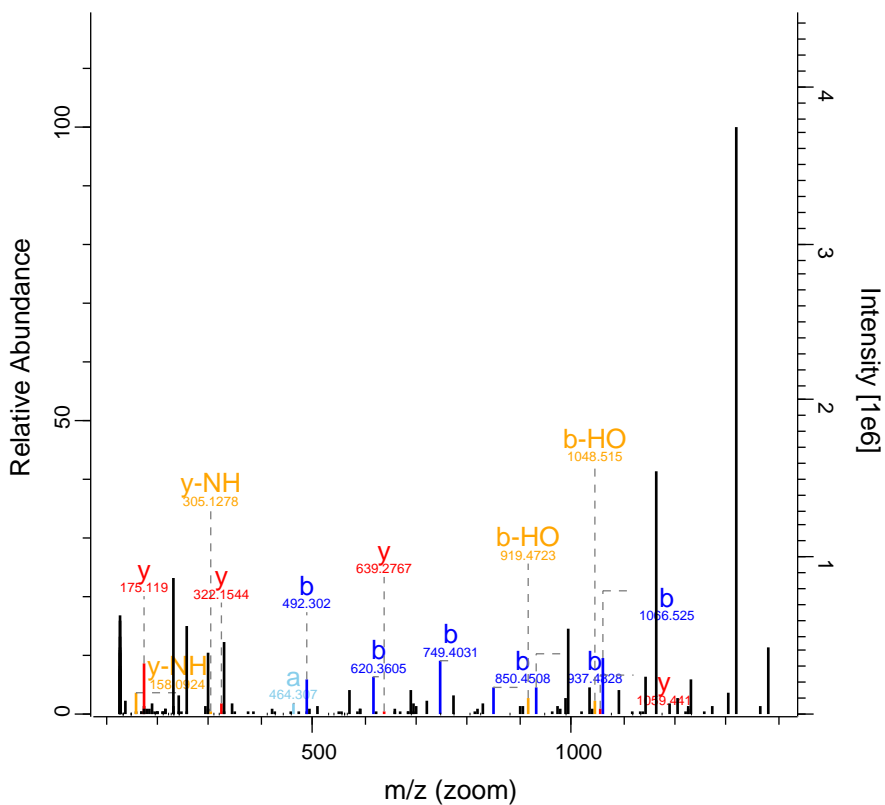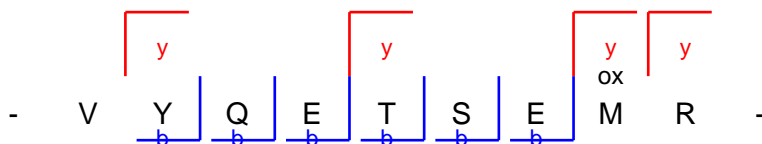



RO-QC-160121\_ZackD\_SS\_Set\_02\_Fraction 8194 FTMS; HC 45.16 664.66 KLF2;KLF4

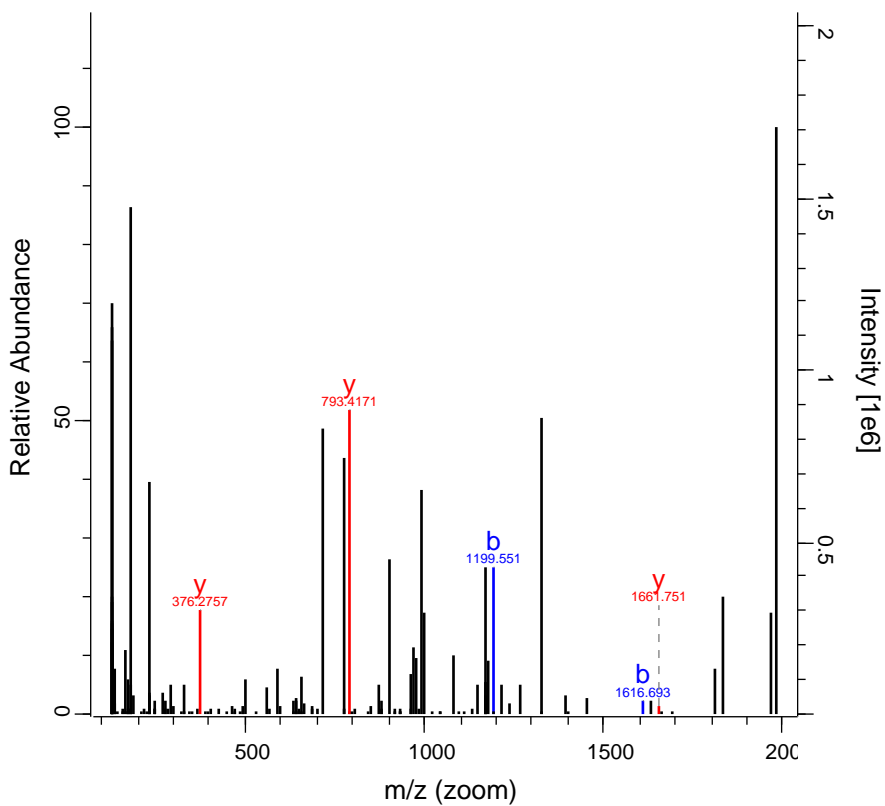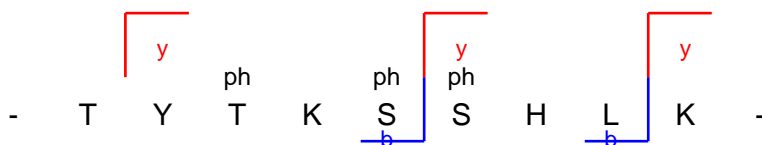

RO-QC-160121\_ZackD\_SS\_Set\_02\_Fraction 8502 FTMS; HC 101.64 726.89 SERF2

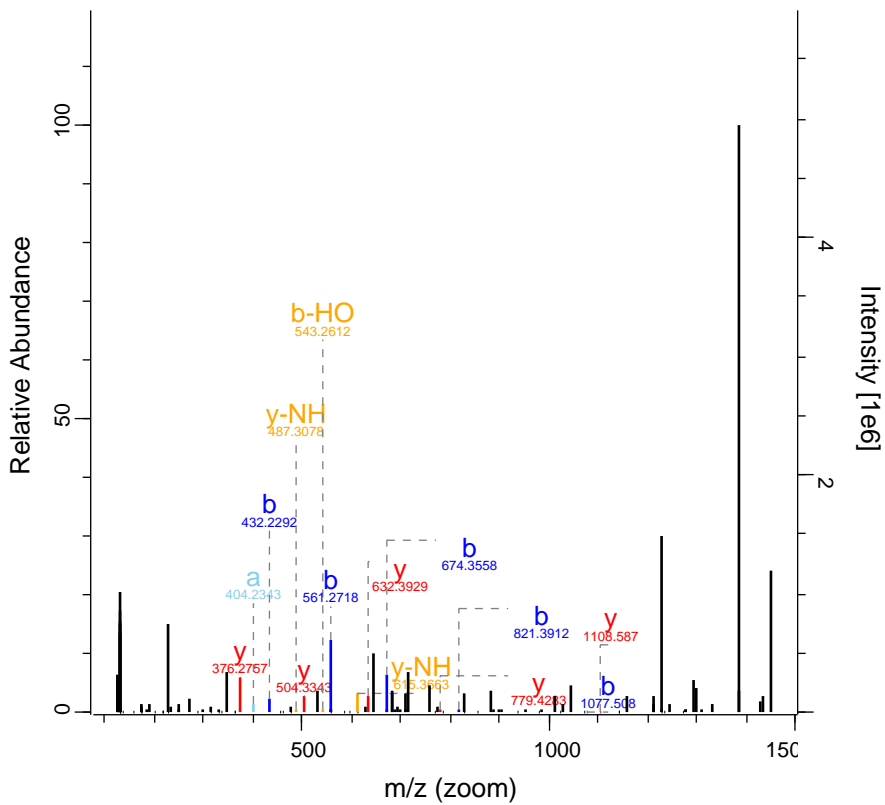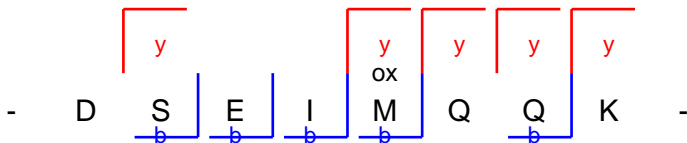



RO-QC-160121\_ZackD\_SS\_Set\_02\_Fraction 10177 FTMS; HC 94.41 366.22 C2orf15

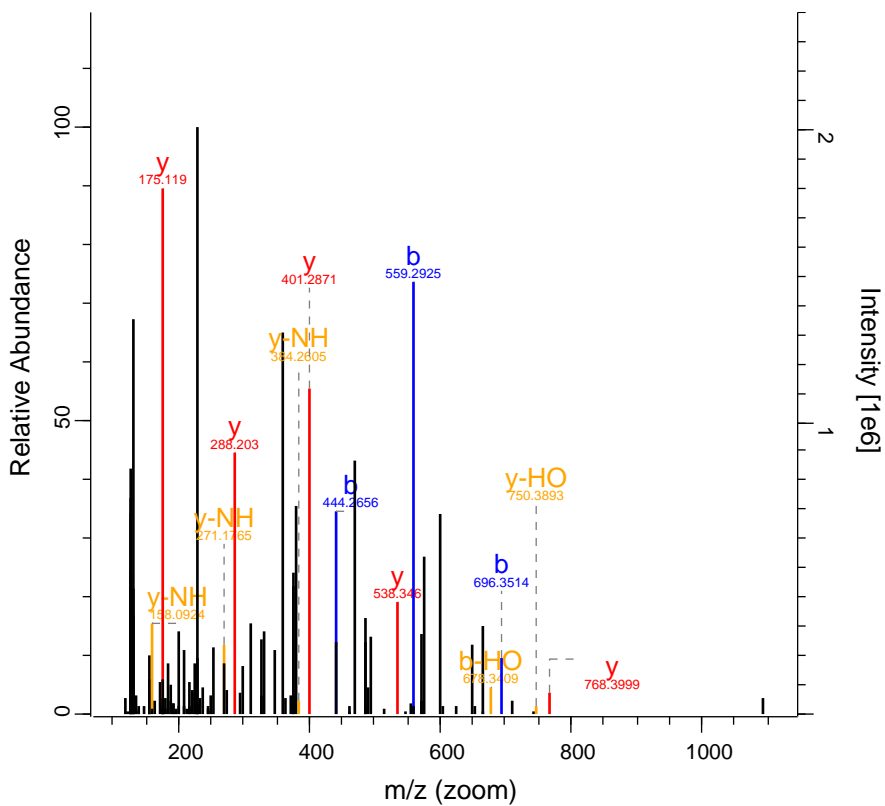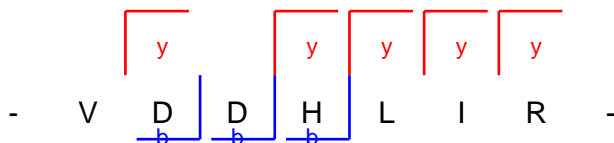

RO-QC-160121\_ZackD\_SS\_Set\_02\_Fraction10216 FTMS; HC 284.47 831.39 LEPROT

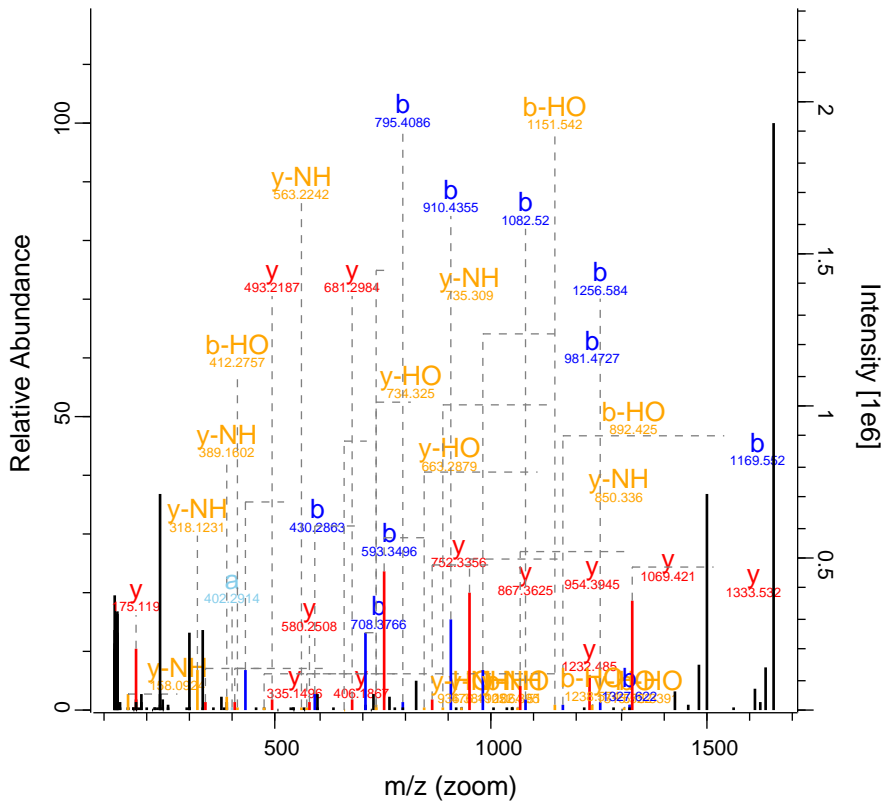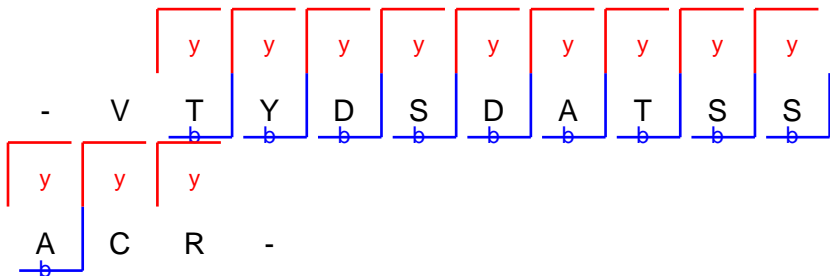

RO-QC-160121\_ZackD\_SS\_Set\_02\_Fract 10301 FTMS; HC 47.82 427.74 GOLGA8B; GOLGA

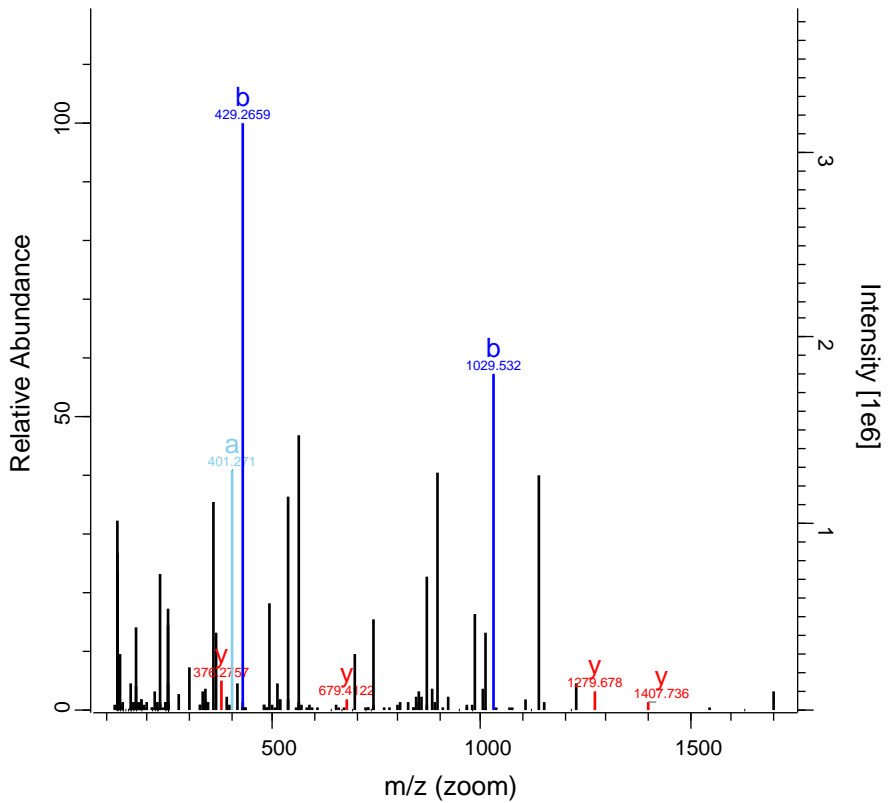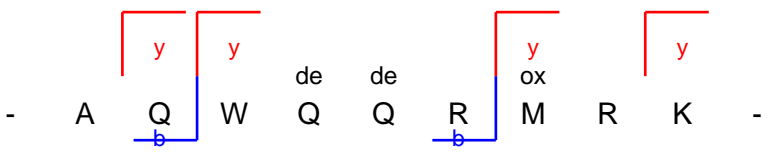

RO-QC-160121\_ZackD\_SS\_Set\_02\_Fraction 10579 FTMS; HC 54.26 400.49 USH1C

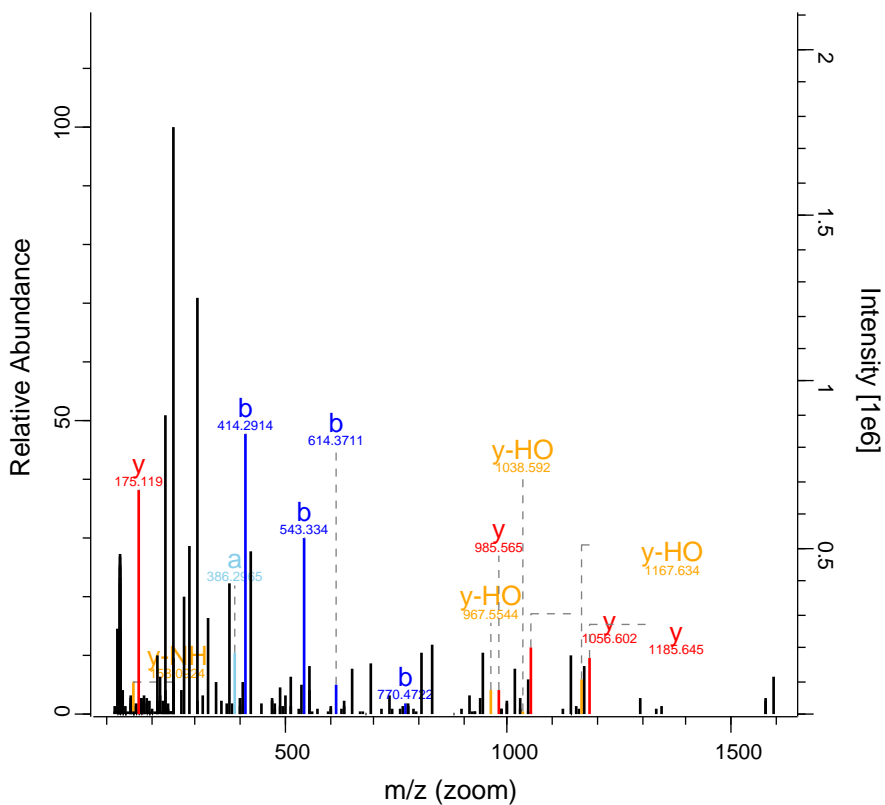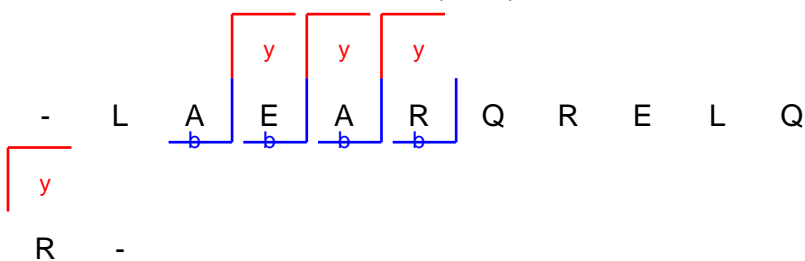

R -

RO-QC-160121\_ZackD\_SS\_Set\_02\_Fraction 12543 FTMS; HC 244.01 832.9 YIPF5

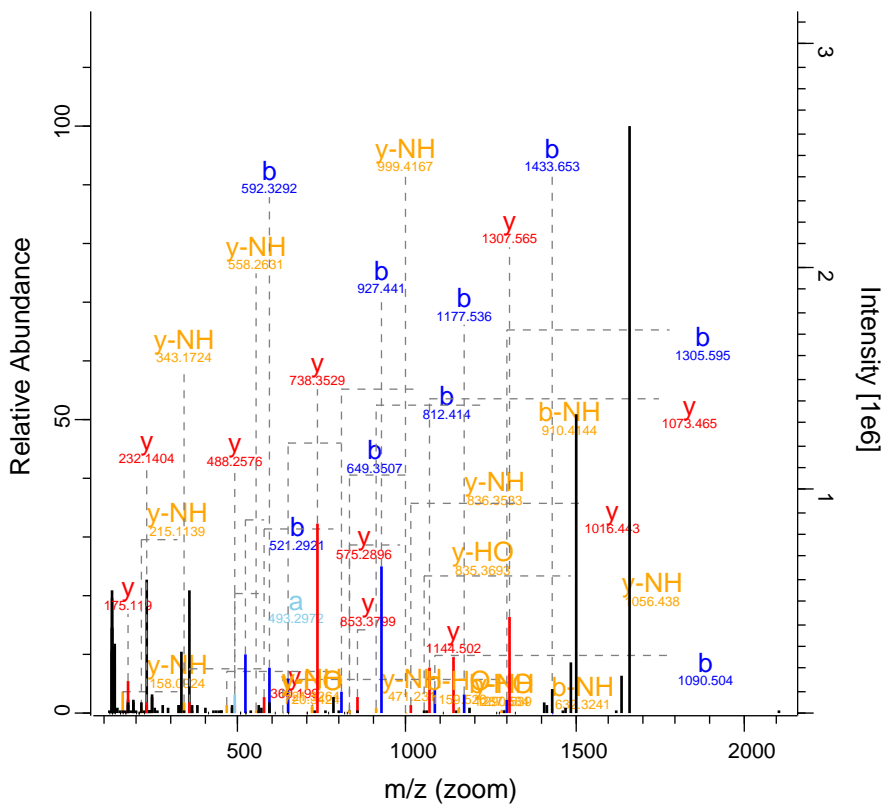



RO-QC-160121\_ZackD\_SS\_Set\_02\_Fraction1 12716 FTMS; HC 66.46 686.84 MLF2

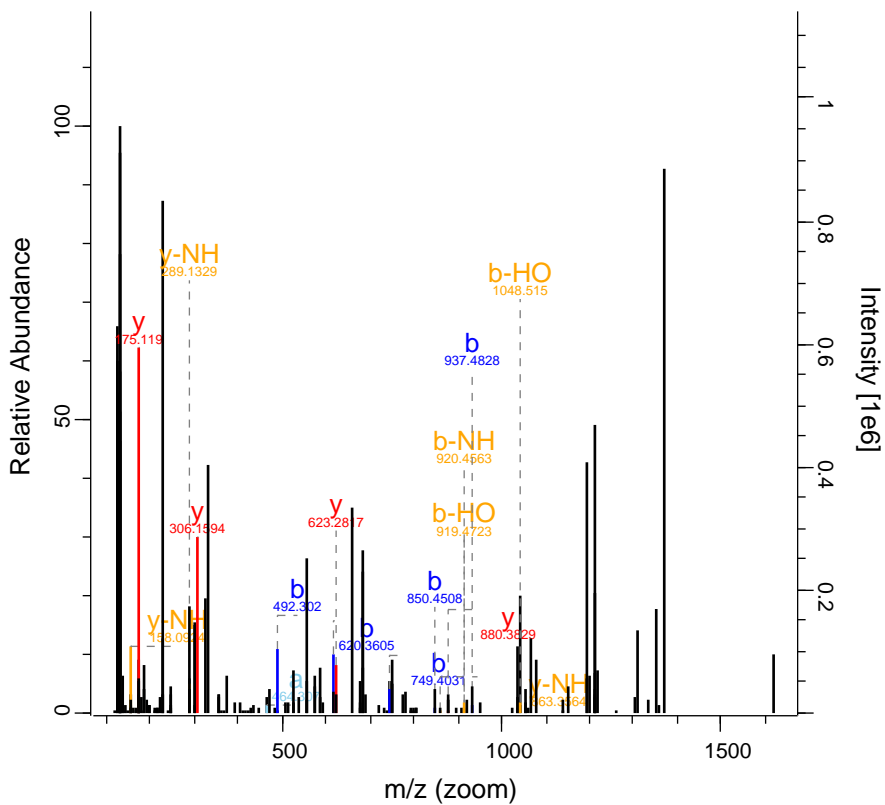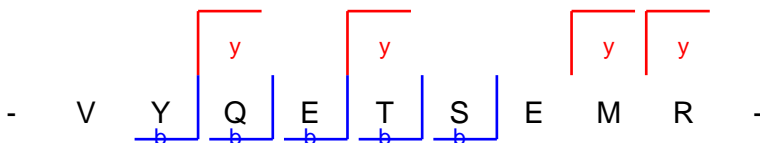

RO-QC-160121\_ZackD\_SS\_Set\_02\_Fraction 12753 FTMS; HC 81.26 833.4 YIPF5

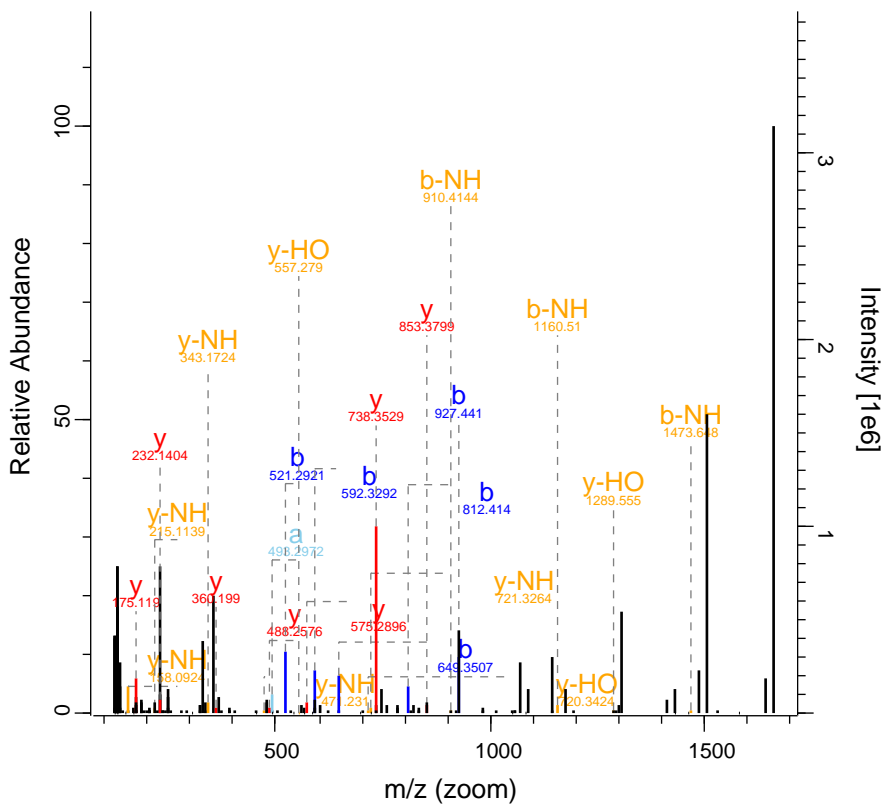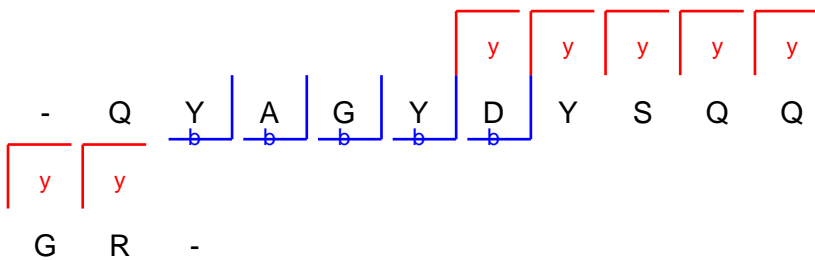

G R -

RO-QC-160121\_ZackD\_SS\_Set\_02\_Fraction12979 FTMS; HC 54.7 725.41 ZNF350

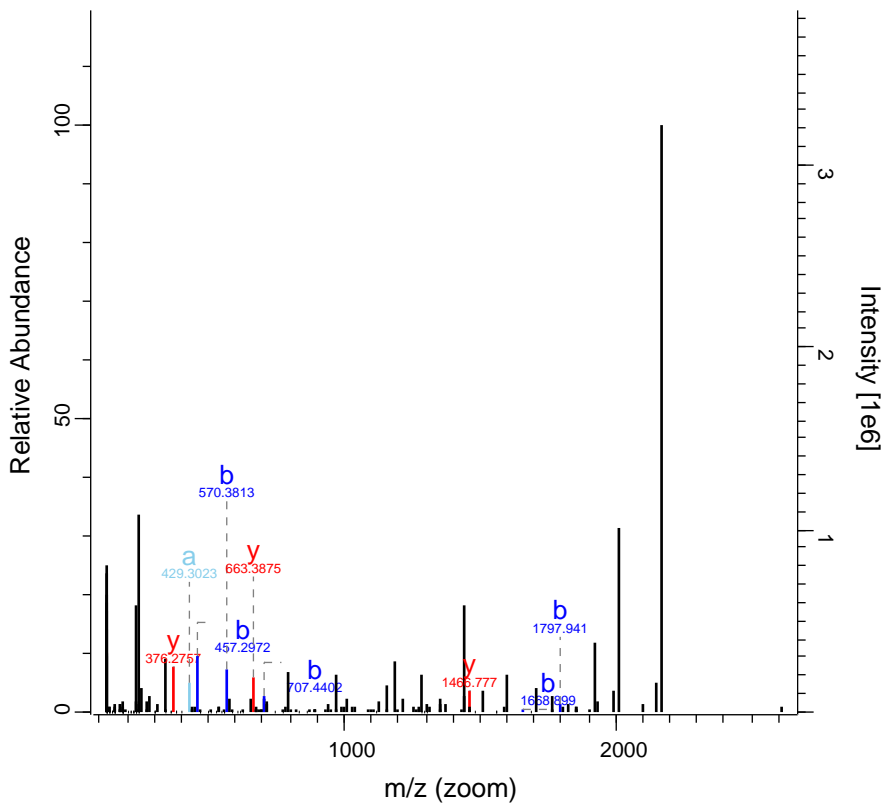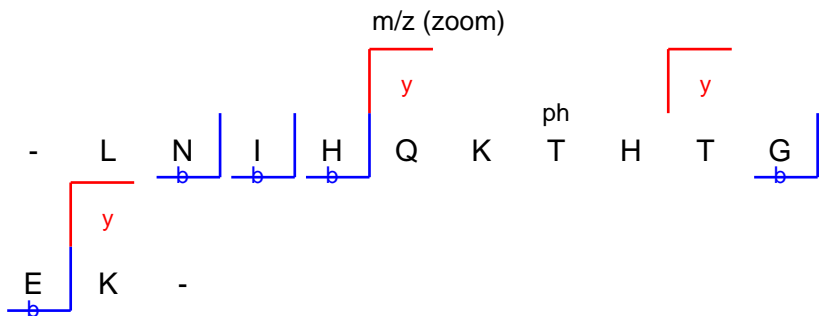

RO-QC-160121\_ZackD\_SS\_Set\_02\_Fraction 13196 FTMS; HC 82.36 725.07 ZNF350

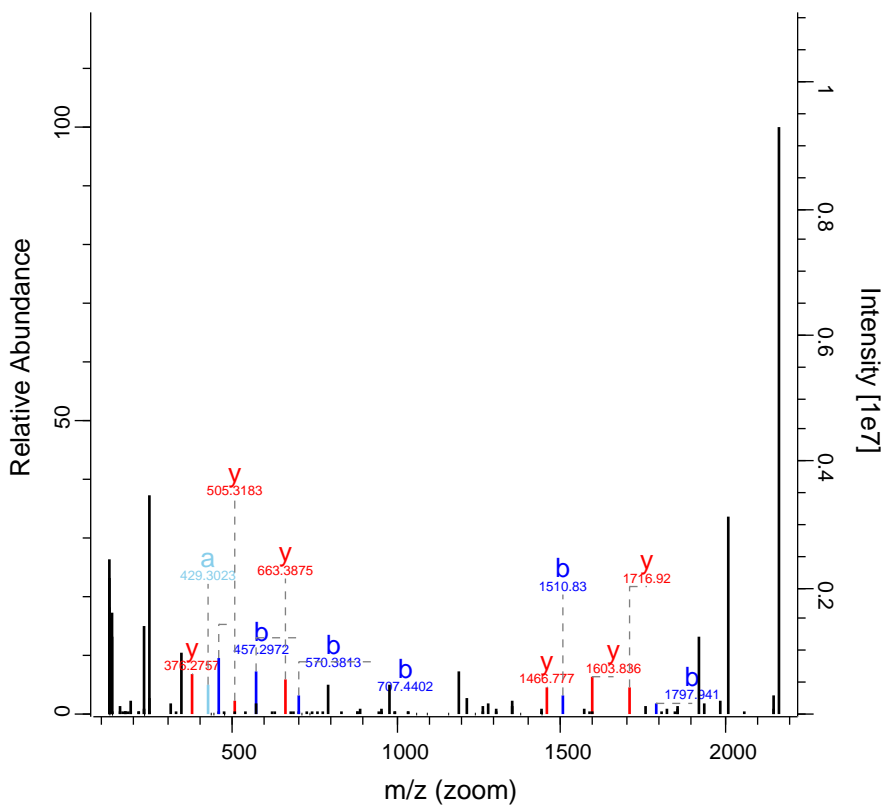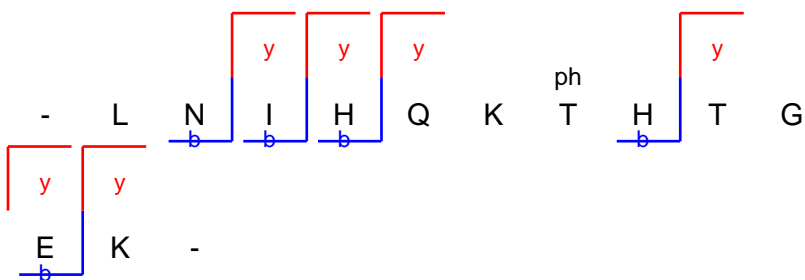

RO-QC-160121\_ZackD\_SS\_Set\_02\_Fraction 13765 FTMS; HC 150.1 745.95 GPR155

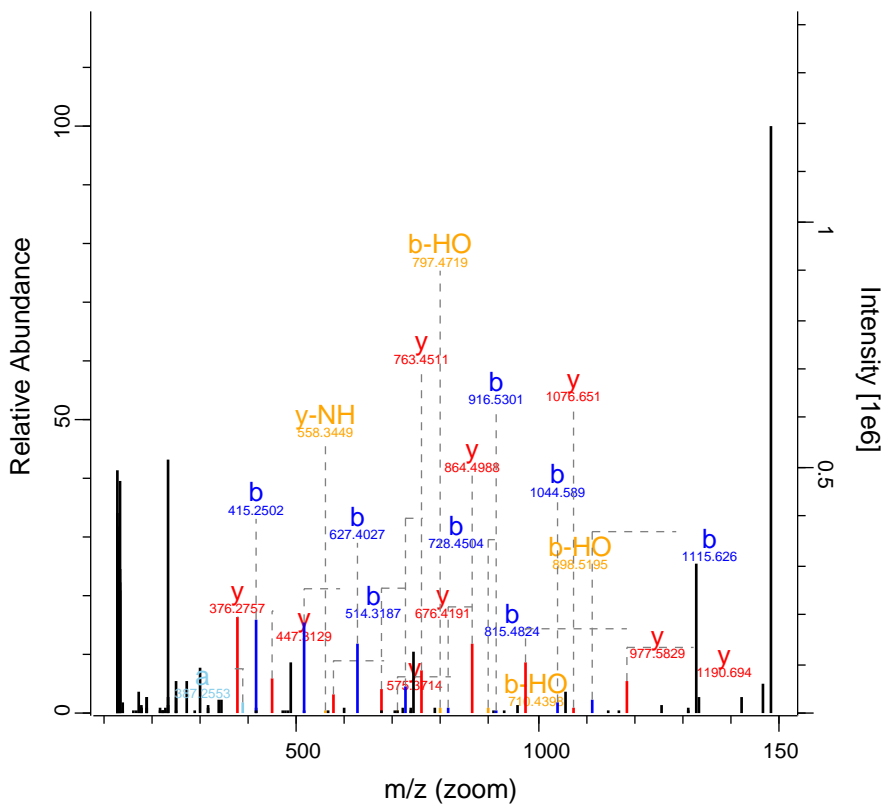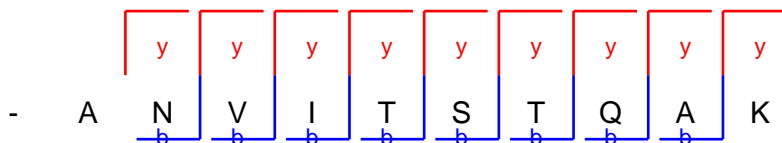

RO-QC-160121\_ZackD\_SS\_Set\_02\_Fraction1 13767 FTMS; HC 94.32 783.71 F2R

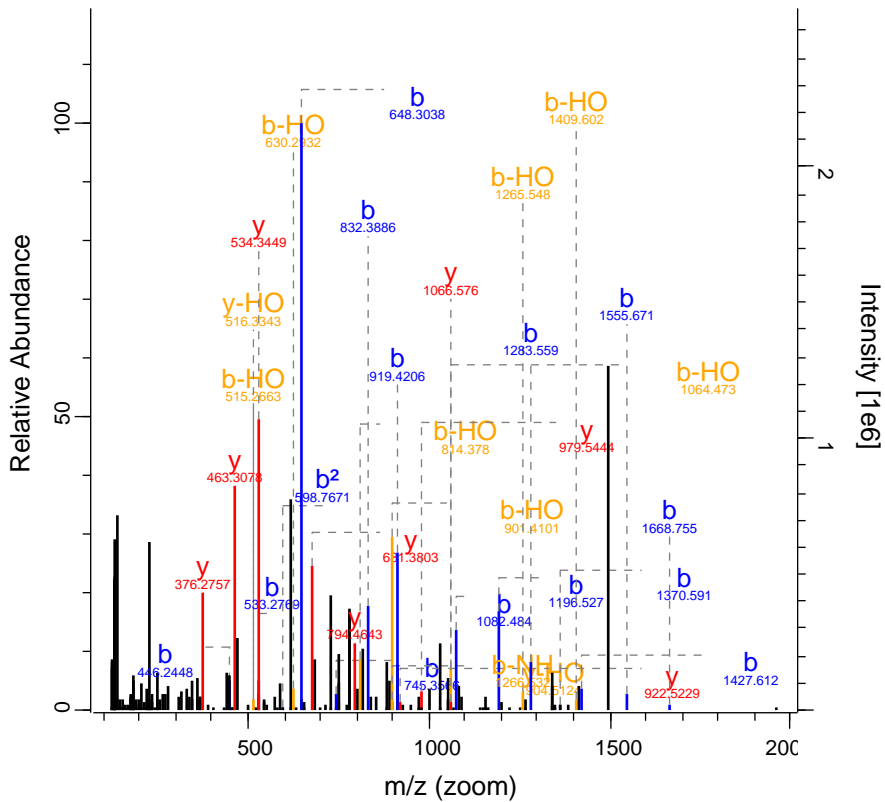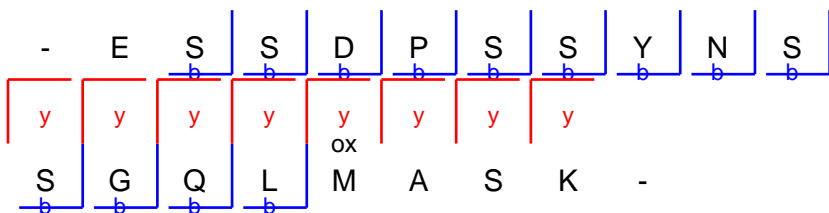

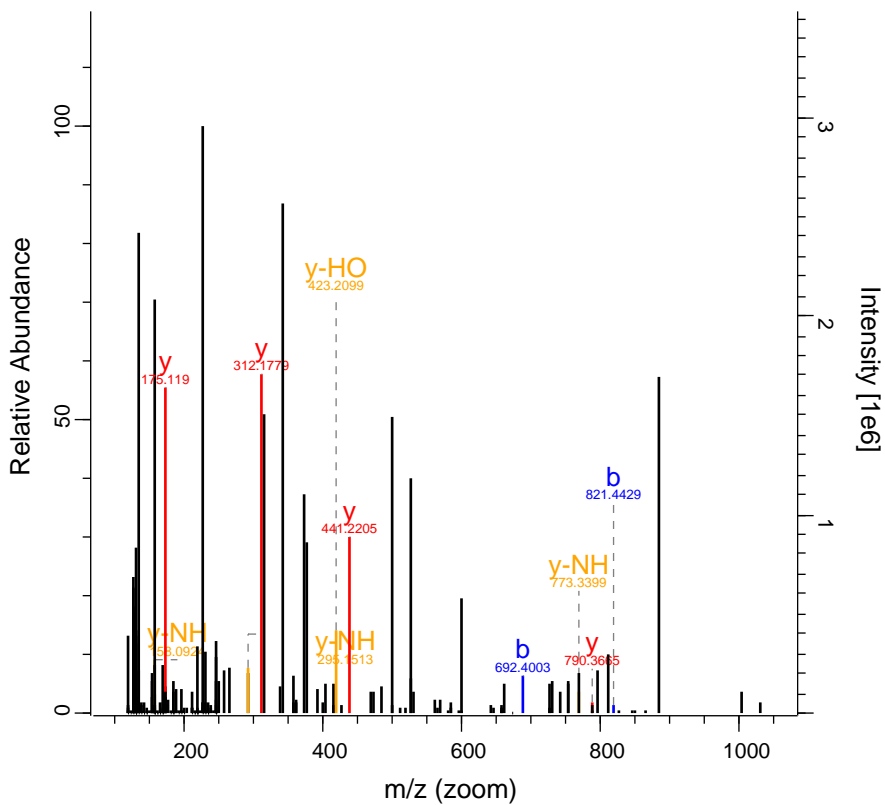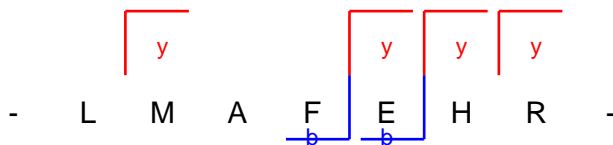

Raw File

Scan Method Score m/z

RO-QC-160121\_ZackD\_SS\_Set\_02\_Fraction\_11

14395 FTMS; HCD 59.21 378.21

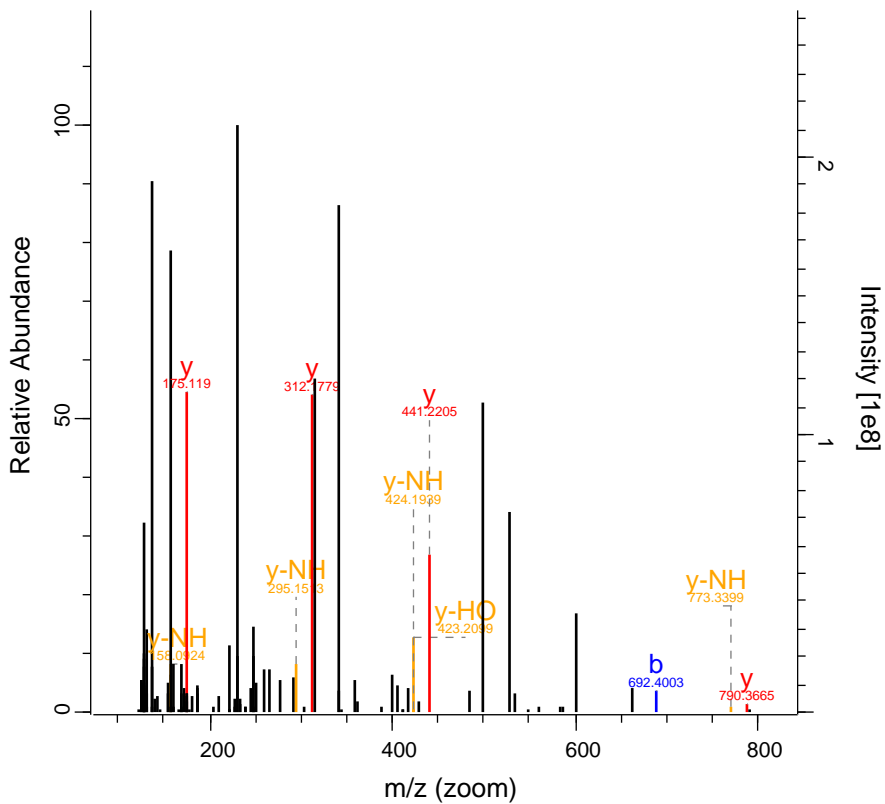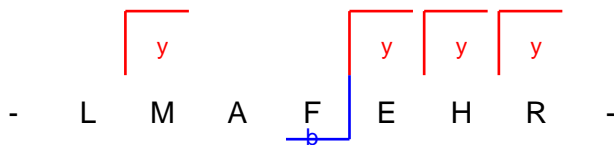



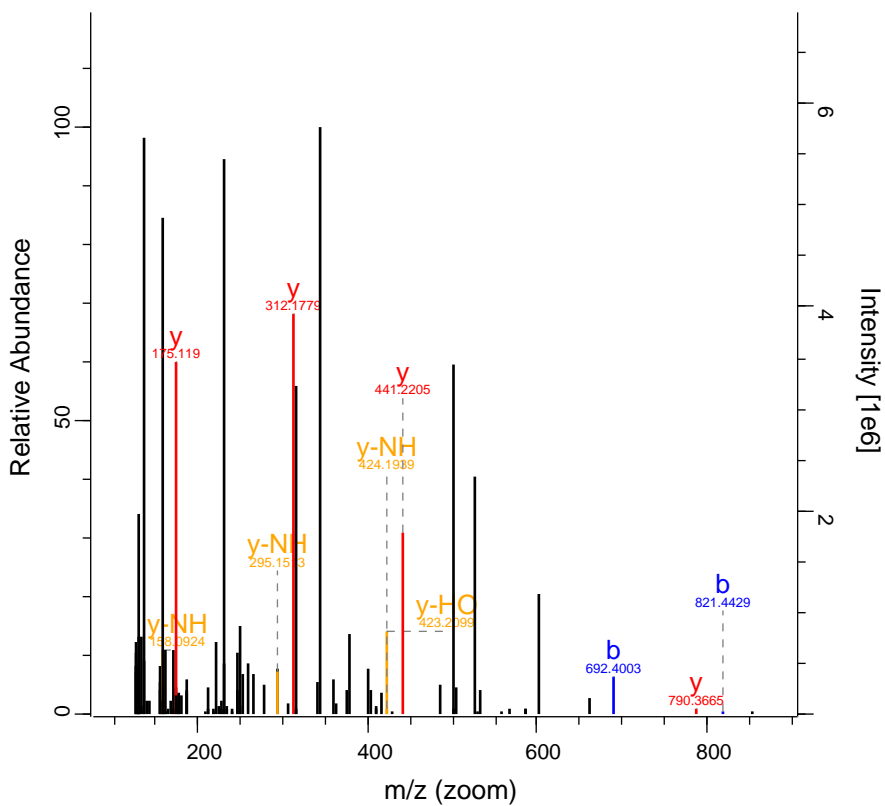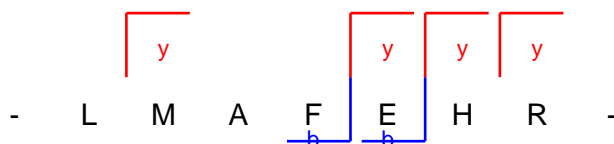

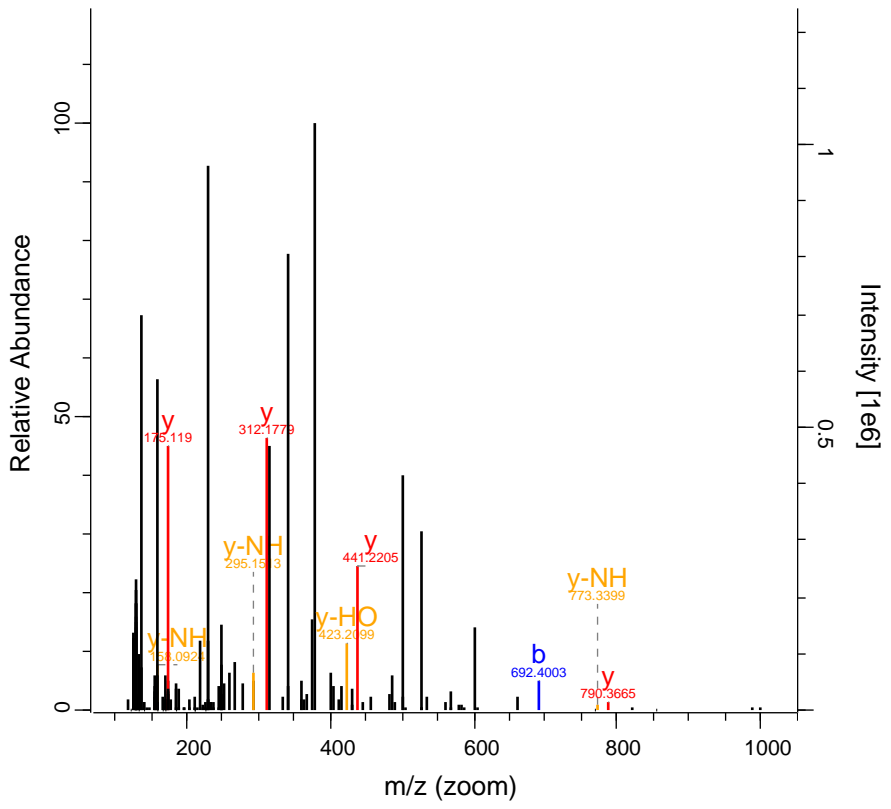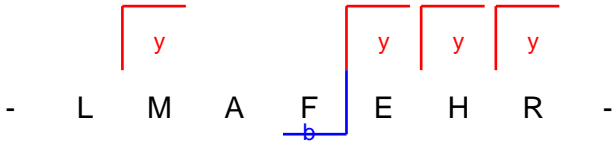

RO-QC-160121\_ZackD\_SS\_Set\_02\_Fraction 15785 FTMS; HC 93.11 1063.04 LRRC8B

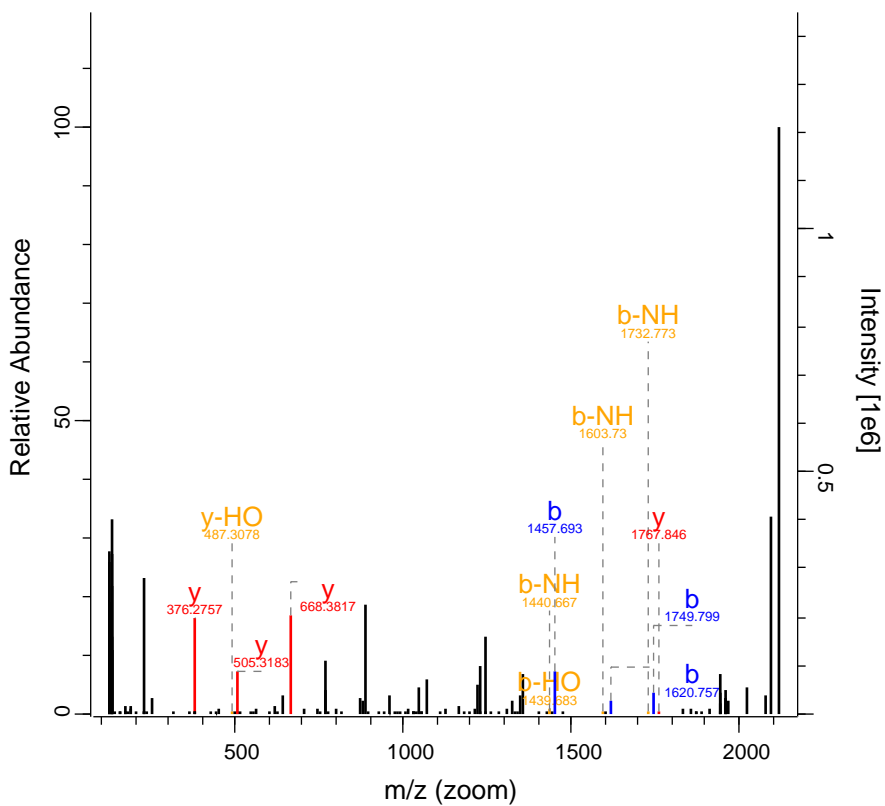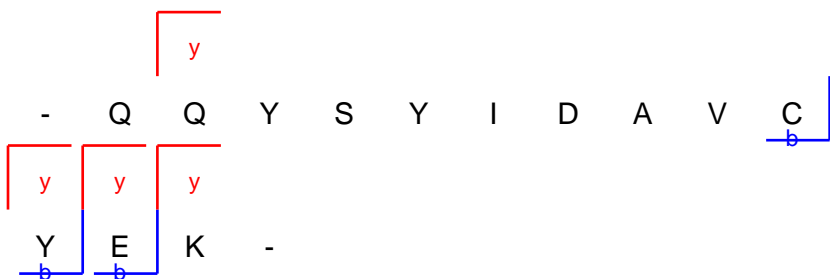

RO-QC-160121\_ZackD\_SS\_Set\_02\_Fraction 16489 FTMS; HC 92.49 608.34 UTS2

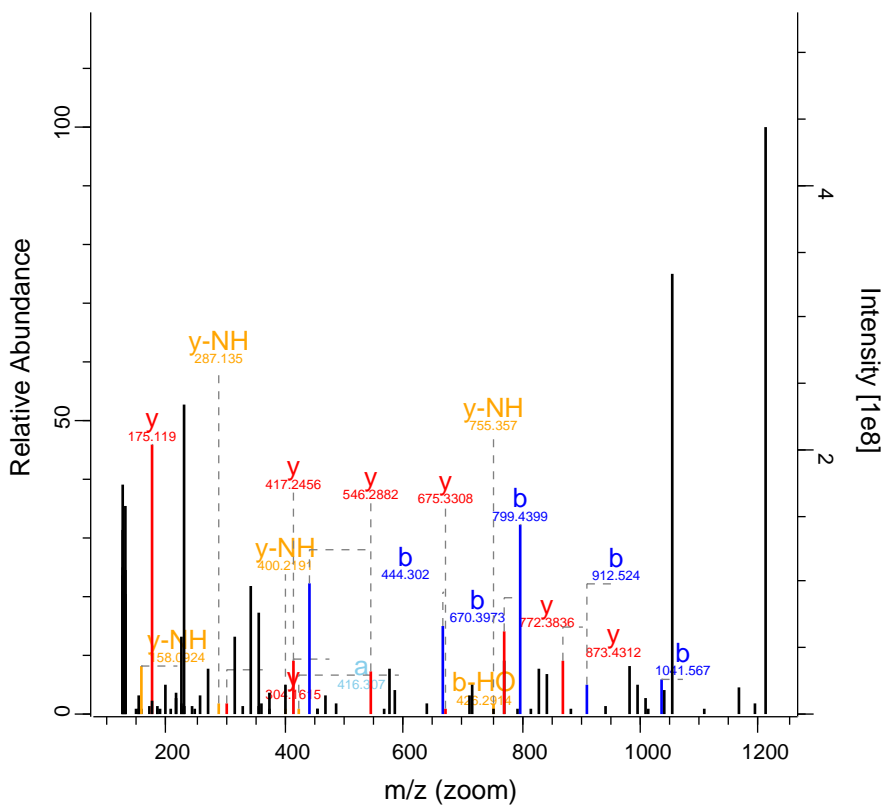

RO-QC-160121\_ZackD\_SS\_Set\_02\_Fraction16716 FTMS; HC 110.12 608.34 UTS2

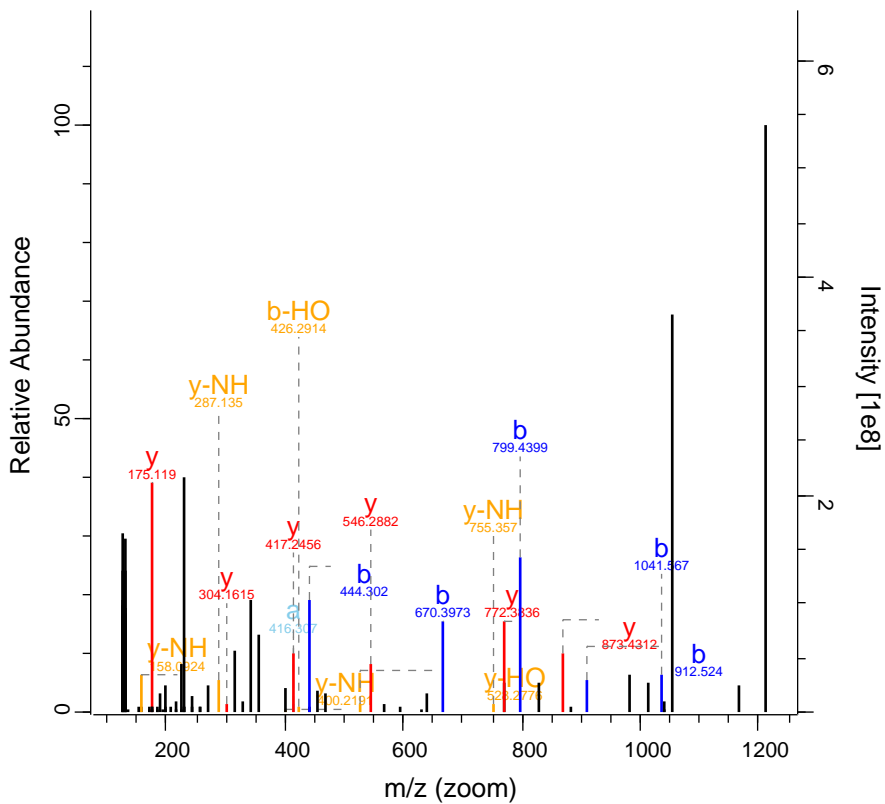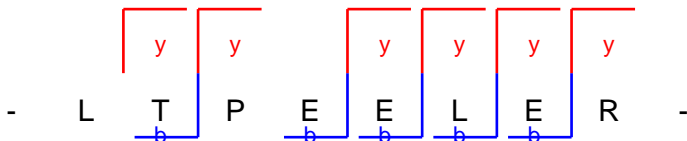

RO-QC-160121\_ZackD\_SS\_Set\_02\_Fraction 16950 FTMS; HC 58.72 608.34 UTS2

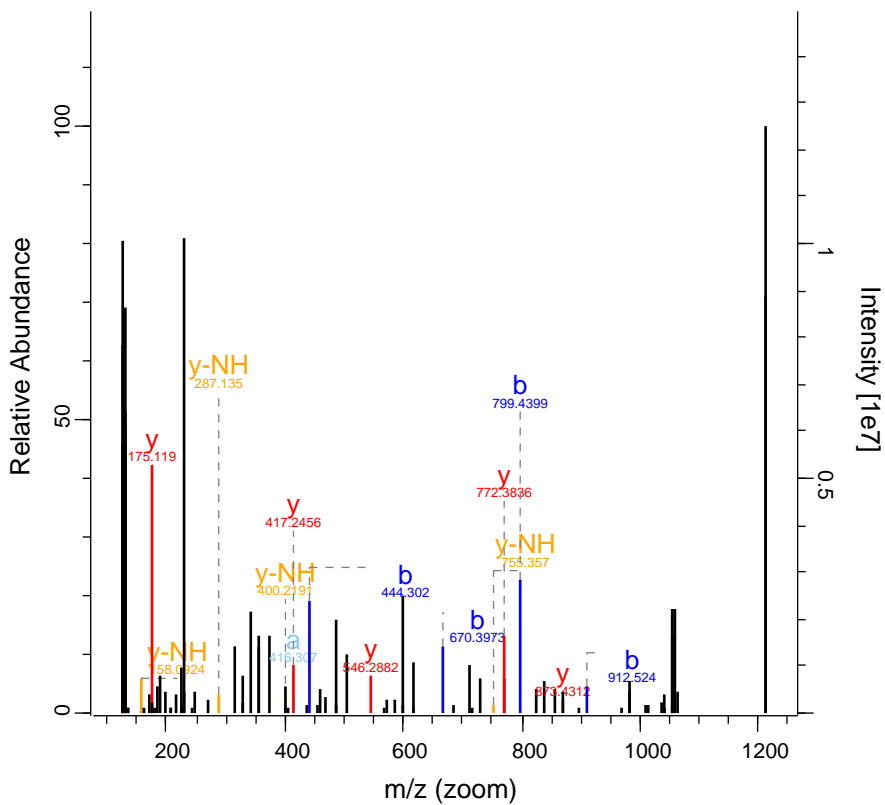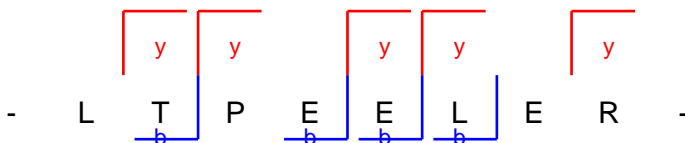

RO-QC-160121\_ZackD\_SS\_Set\_02\_Fraction 16962 FTMS; HC 87.5 649.05 MAD2L1BP

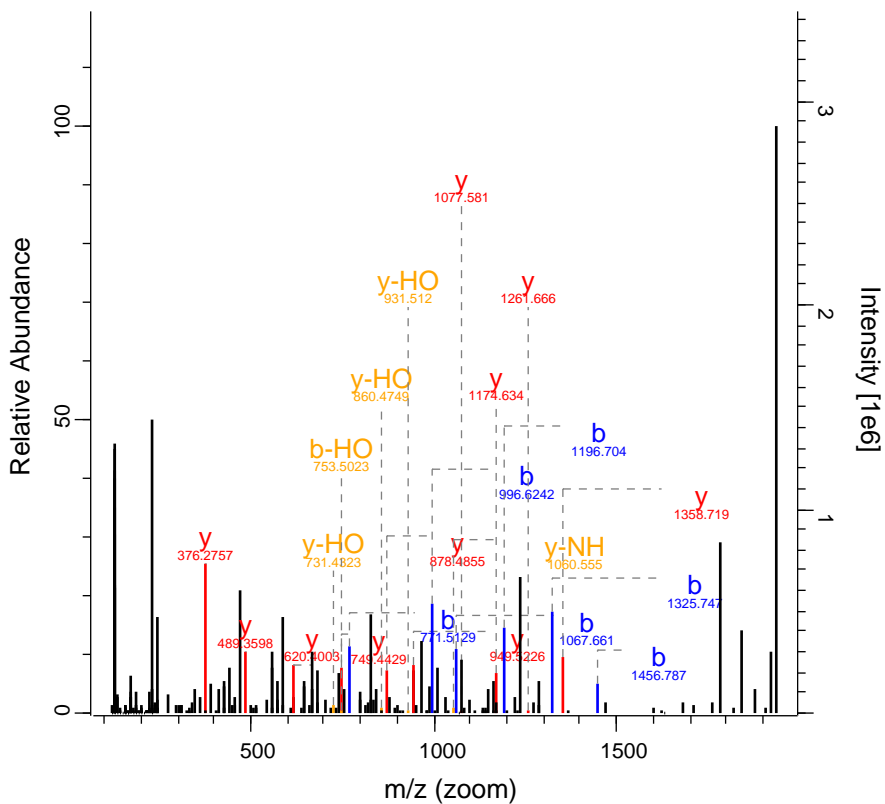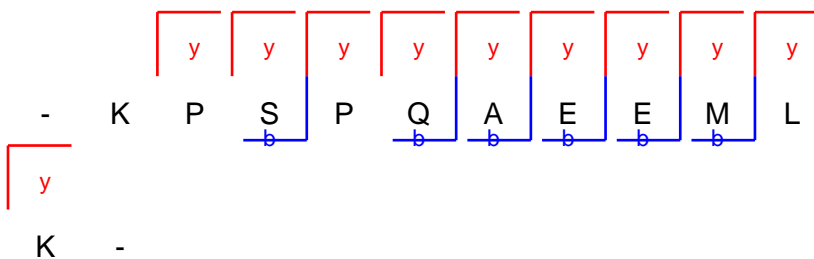

K -

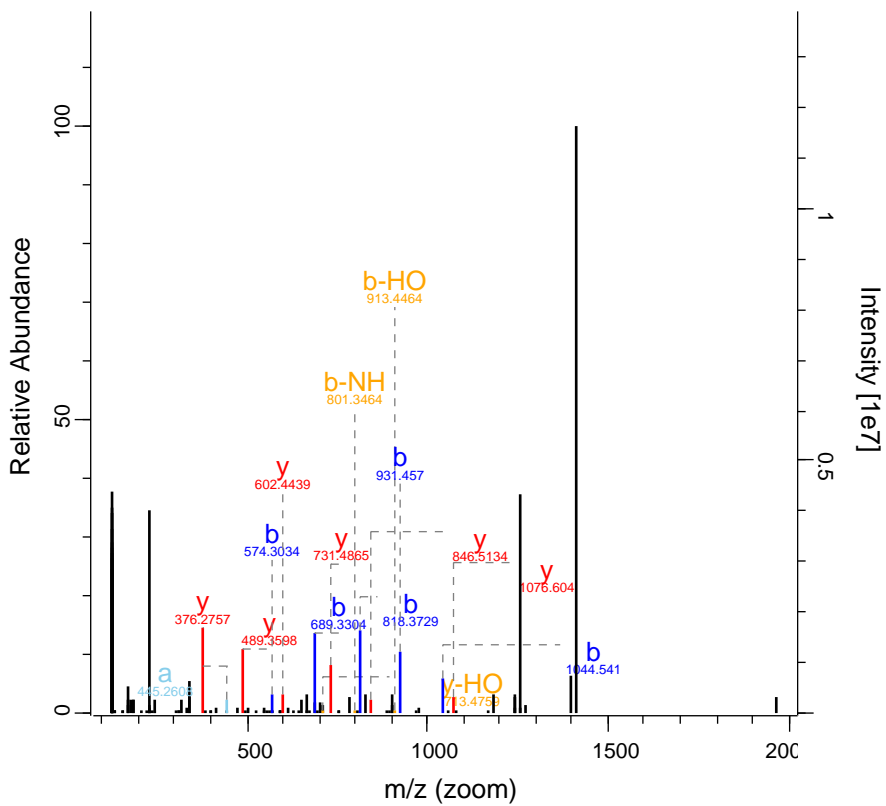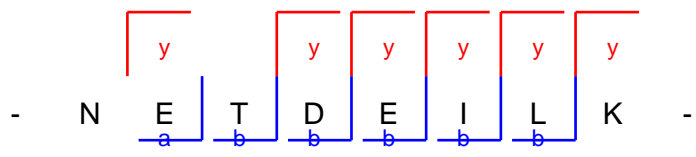



RO-QC-160121\_ZackD\_SS\_Set\_02\_Fraction17291 FTMS; HC 172.8 897.99 CCDC59

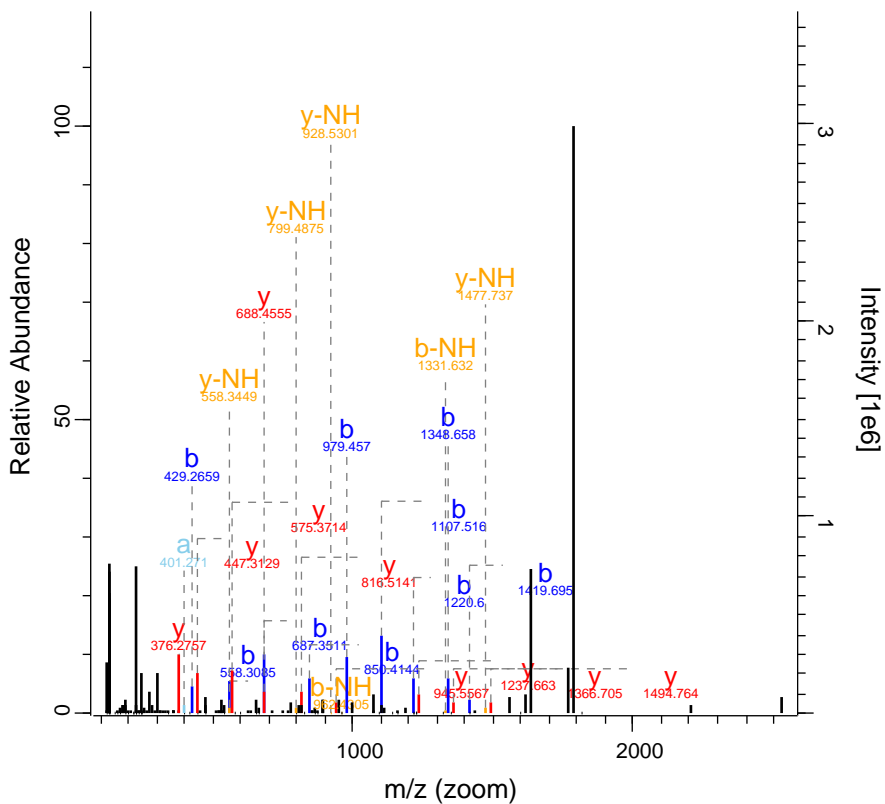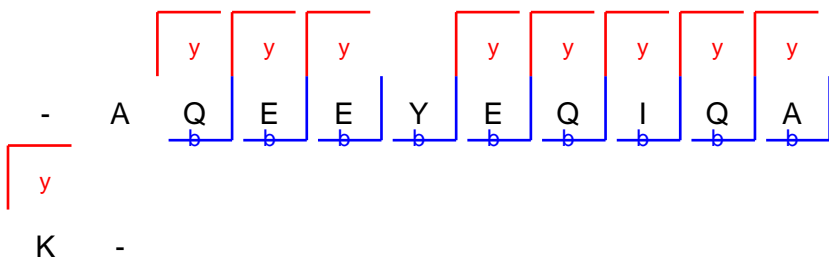

RO-QC-160121\_ZackD\_SS\_Set\_02\_Fraction18185 FTMS; HC 81.55 709.44 PCDH17

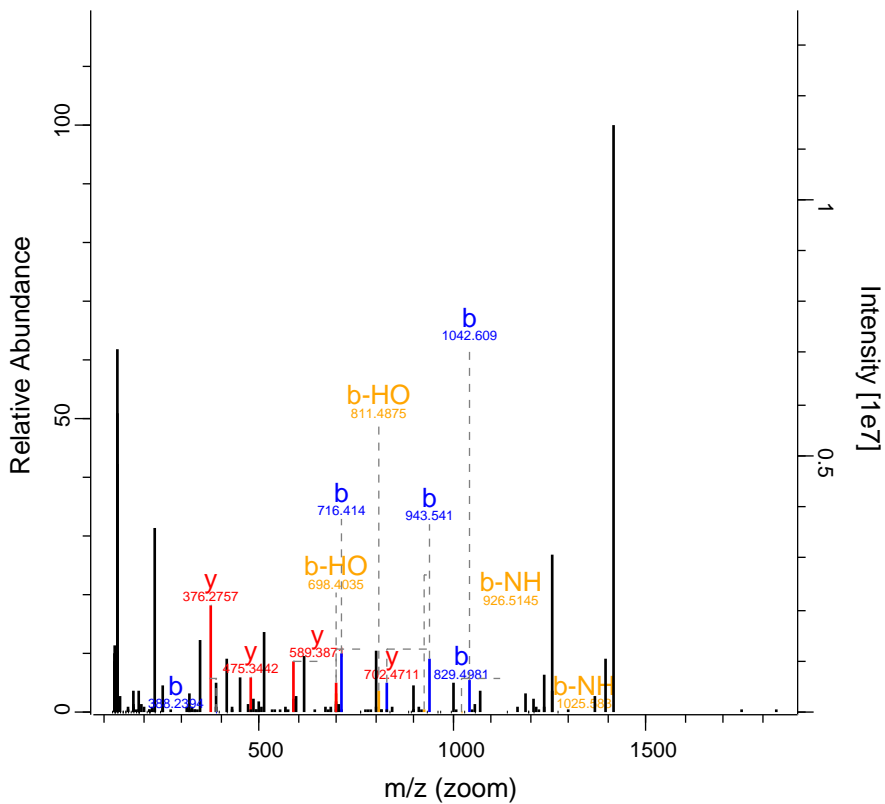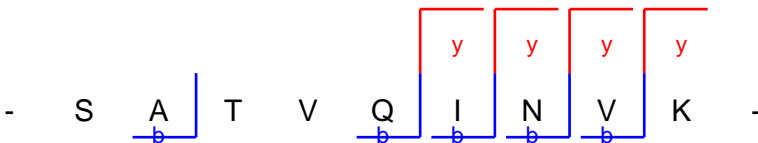

RO-QC-160121\_ZackD\_SS\_Set\_02\_Fraction 18198 FTMS; HC 47.96 473.3 PCDH17

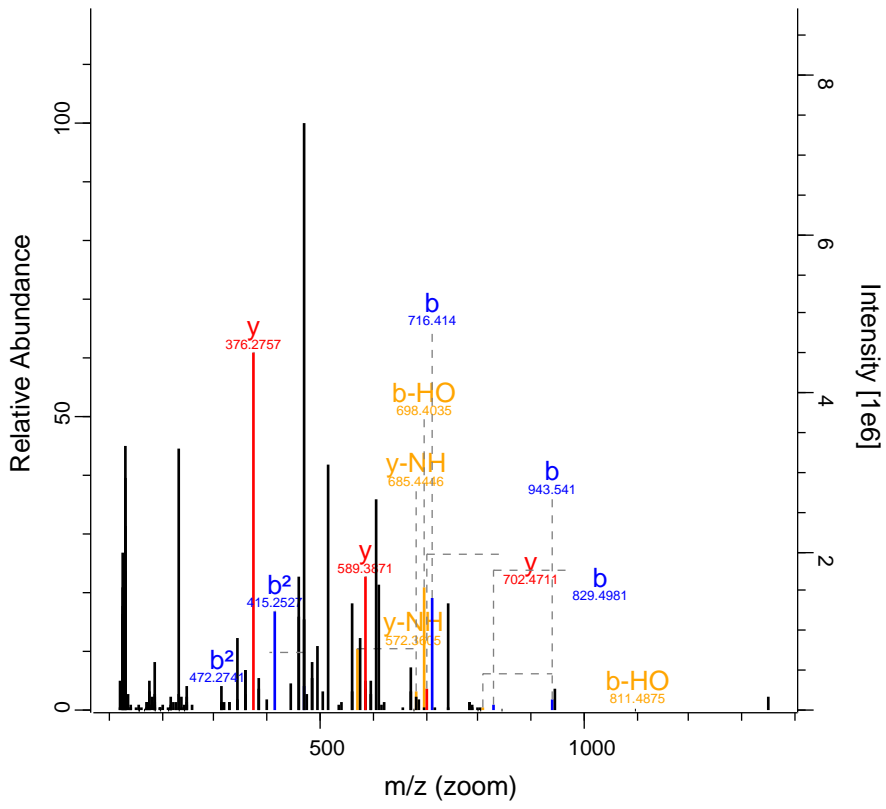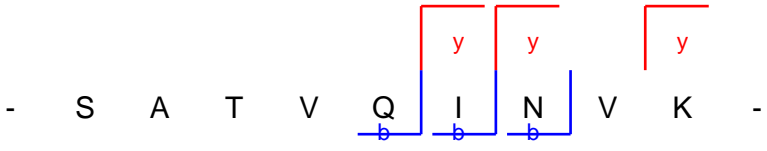

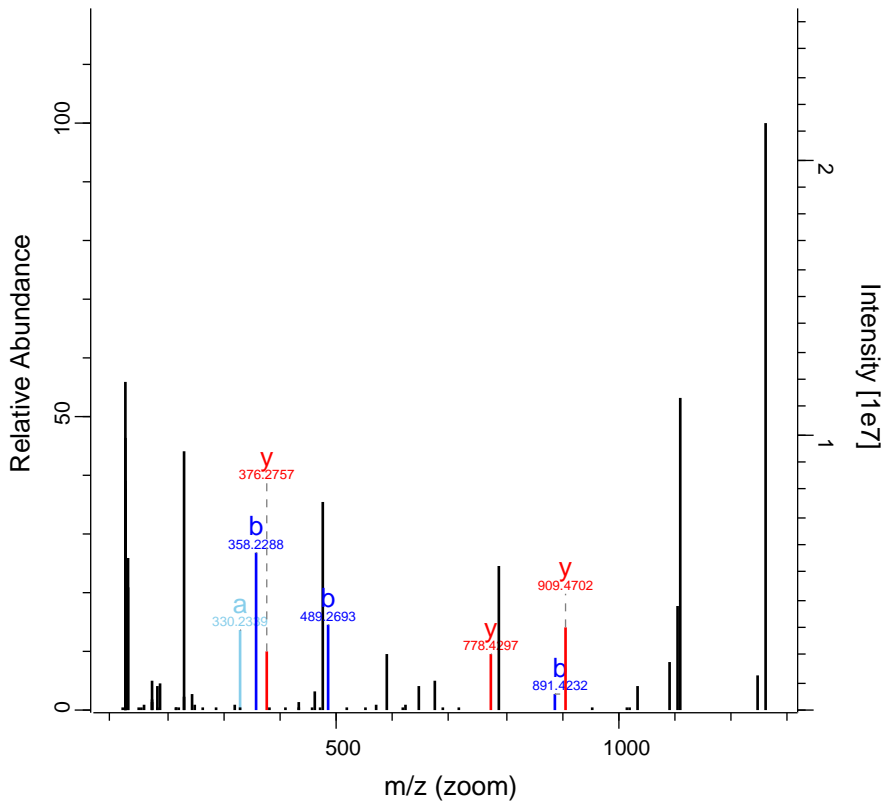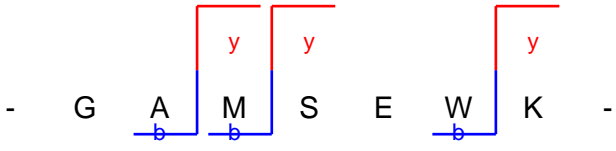

Raw File

Scan Method Score m/z

RO-QC-160121\_ZackD\_SS\_Set\_02\_Fraction\_11

18729 FTMS; HCD 62.84 633.85

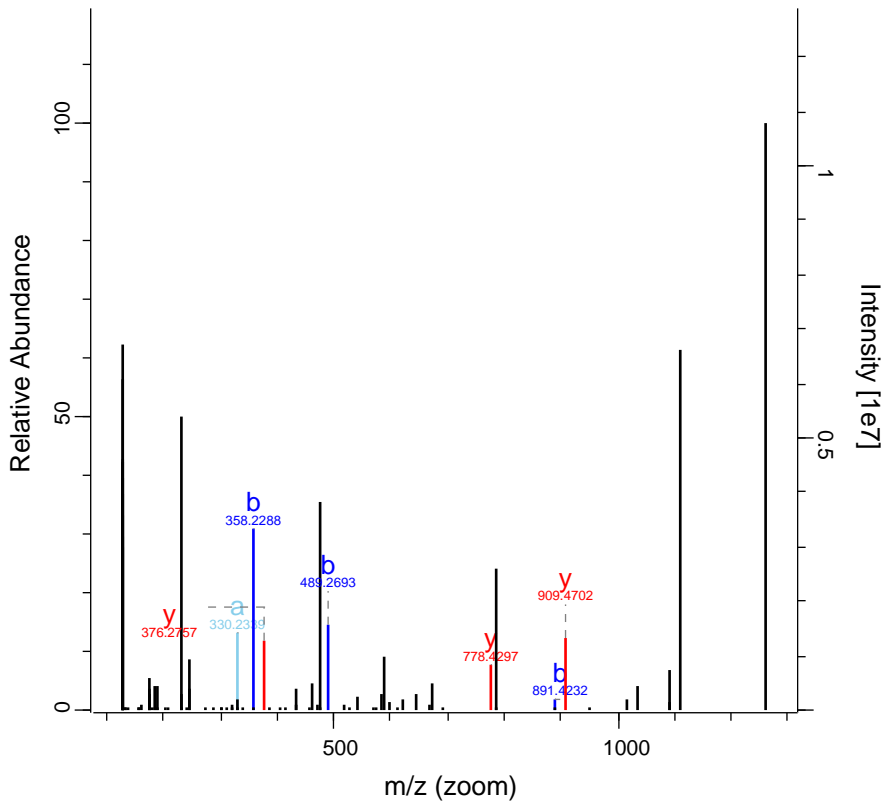

Raw File

Scan Method Score m/z

RO-QC-160121\_ZackD\_SS\_Set\_02\_Fraction\_11

18914 FTMS; HCD 132.57 667.41

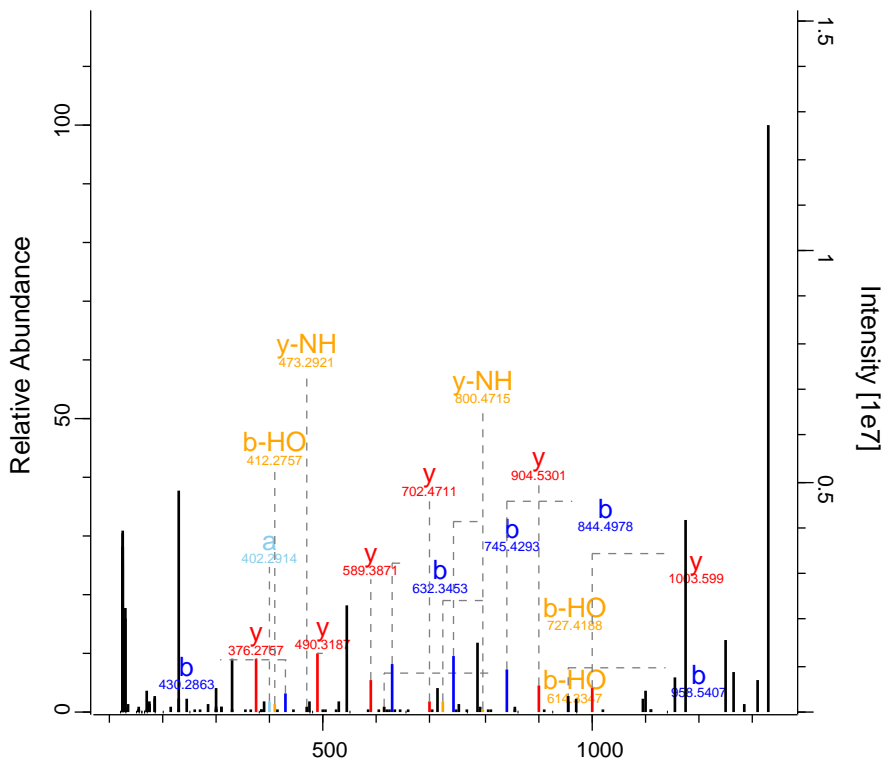

m/z (zoom)

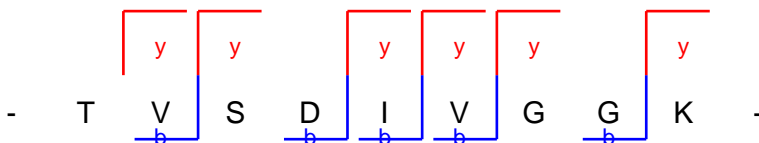

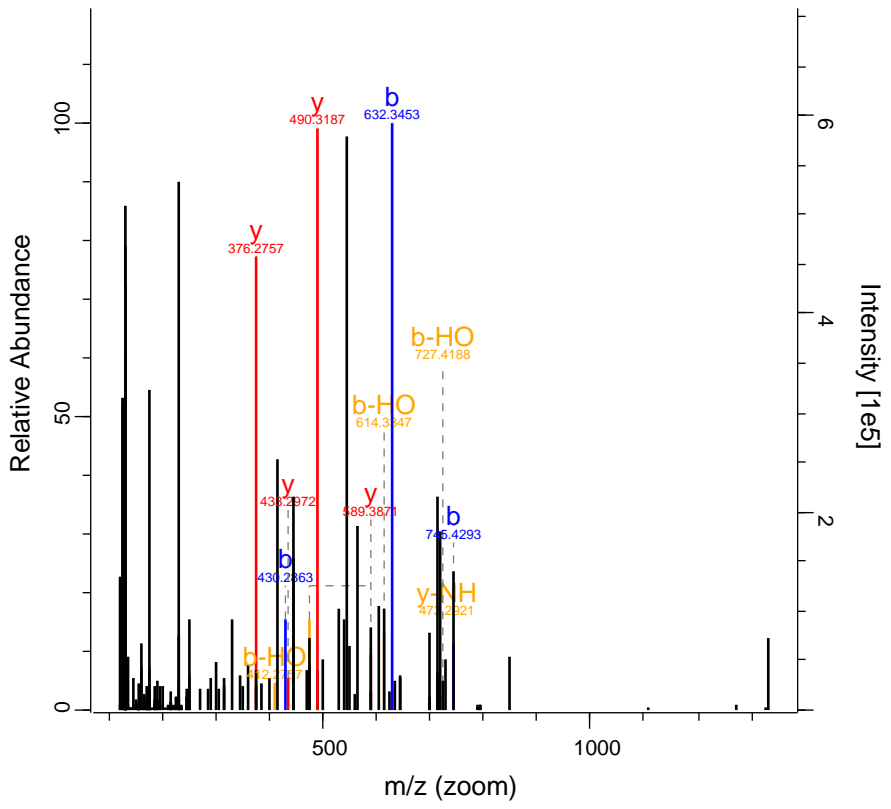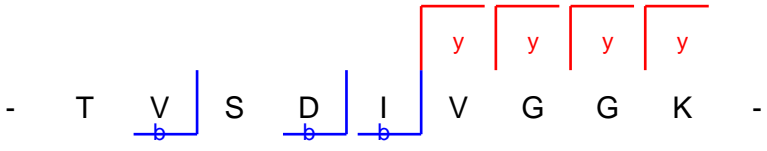

RO-QC-160121\_ZackD\_SS\_Set\_02\_Fraction19353 FTMS; HC 175.15 779.92 FKBP1B

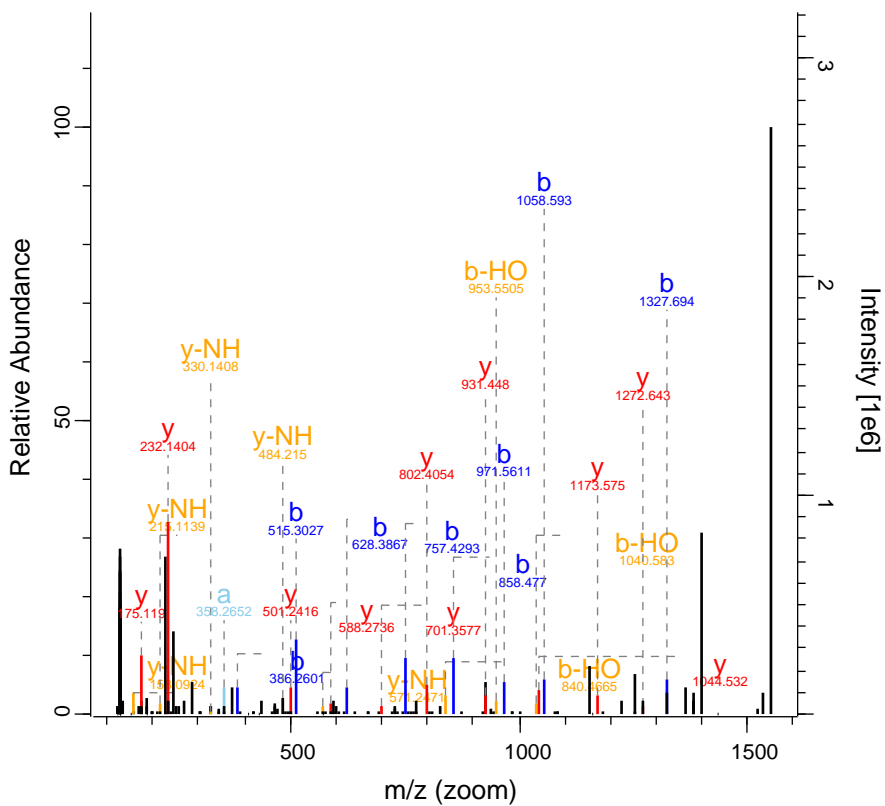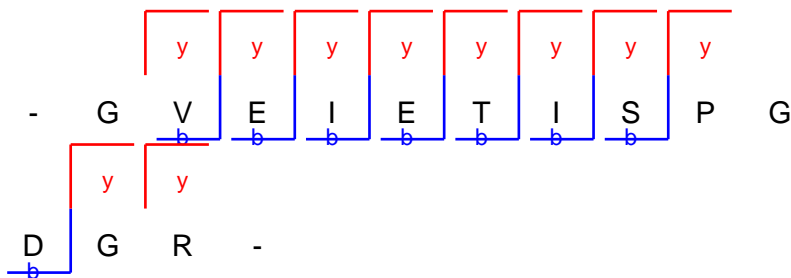



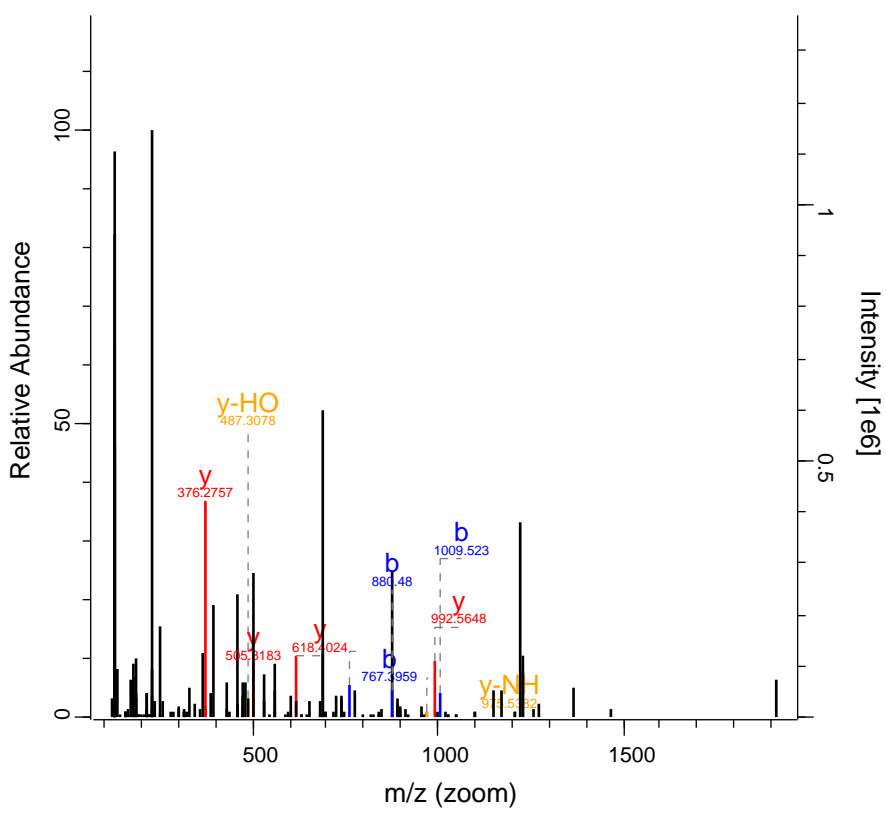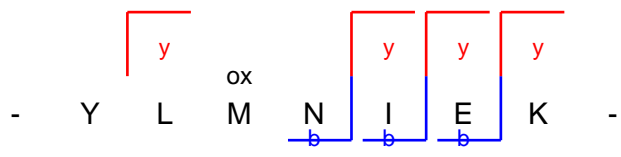

RO-QC-160121\_ZackD\_SS\_Set\_02\_Fraction\_11

19817 FTMS; HCD 66.26 692.9

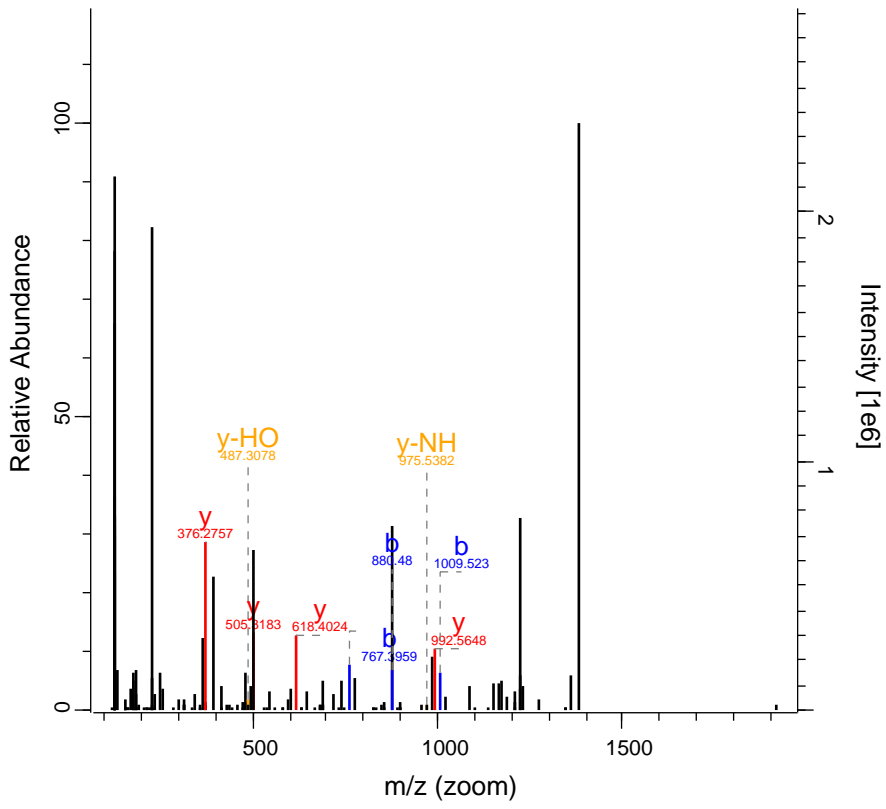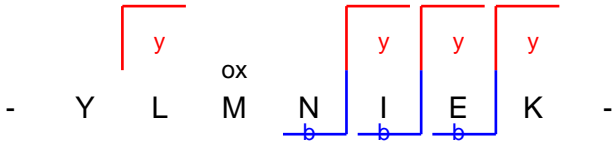



RO-QC-160121\_ZackD\_SS\_Set\_02\_Fraction 21908 FTMS; HC 158.79 855.45 RCBTB1

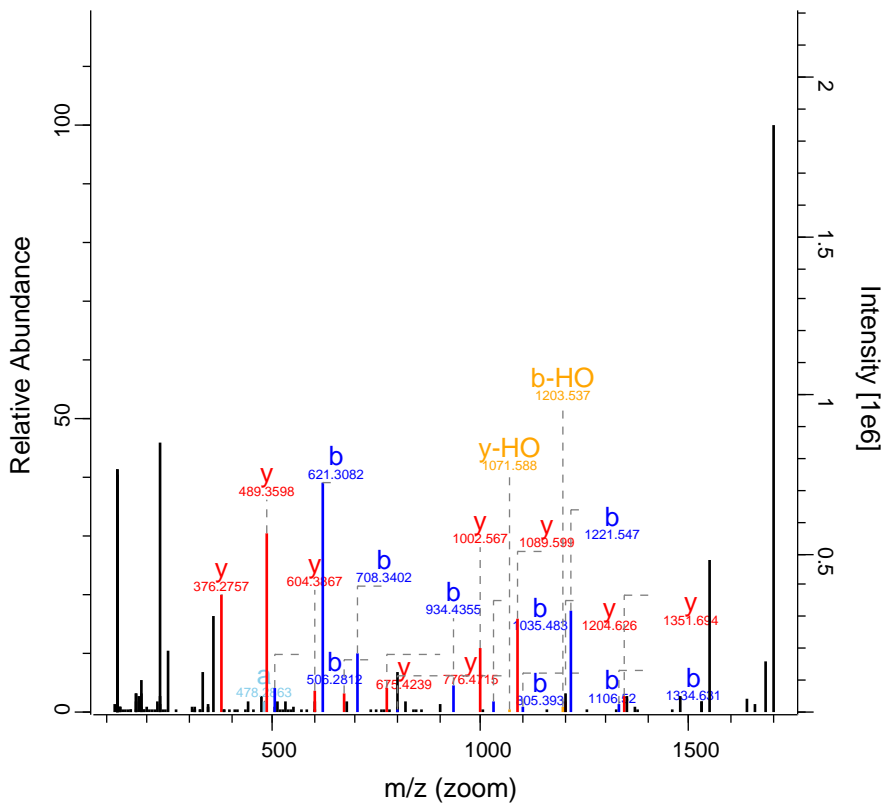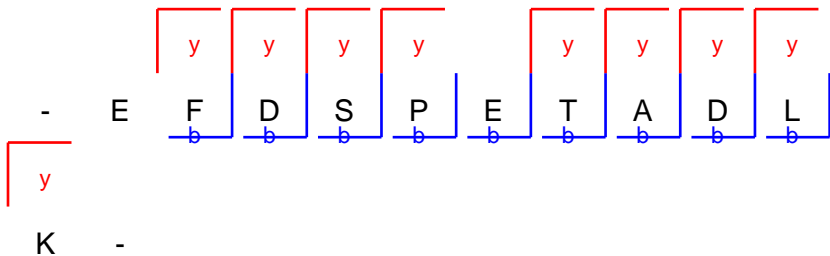

K

RO-QC-160121\_ZackD\_SS\_Set\_02\_Fraction 22245 FTMS; HC 40.06 522.3 SAMD8

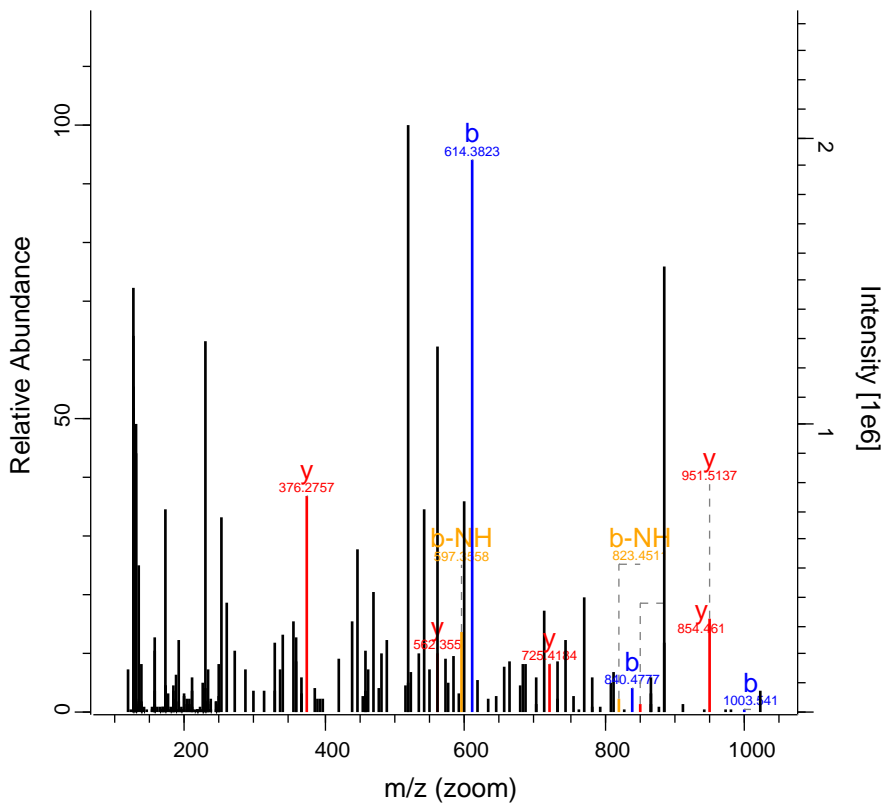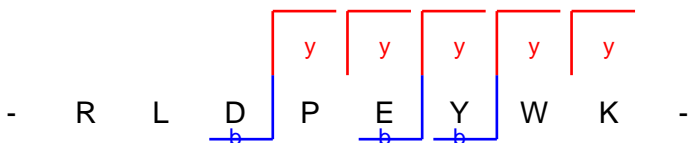

RO-QC-160121\_ZackD\_SS\_Set\_02\_Fraction 22371 FTMS; HC 108.57 779.13 GPR176

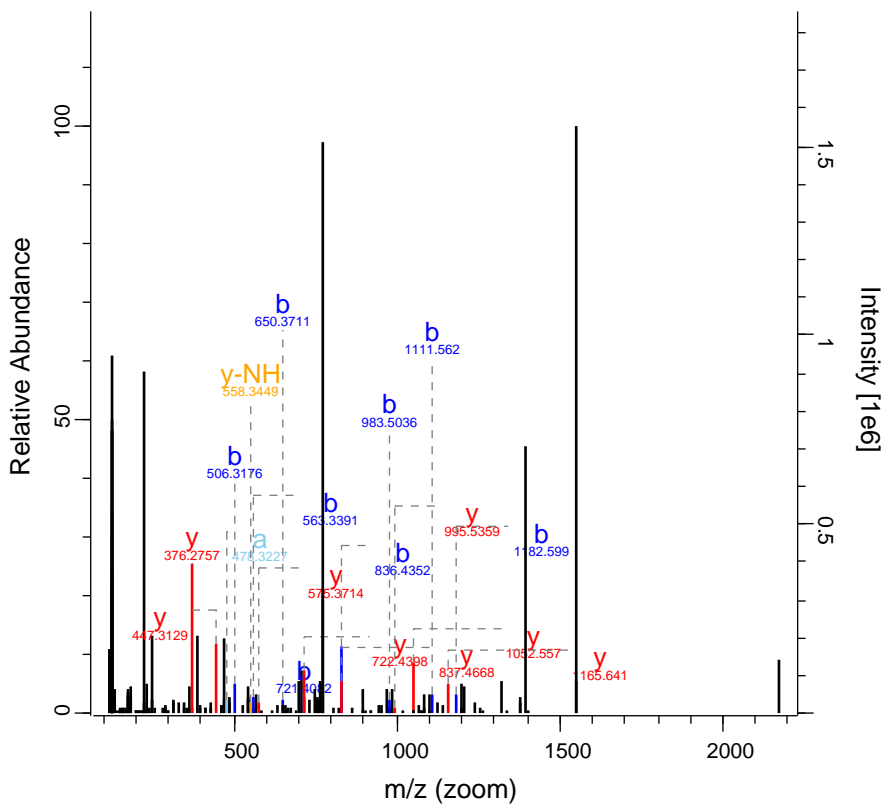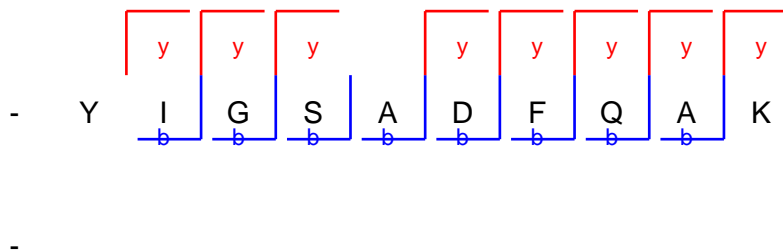

RO-QC-160121\_ZackD\_SS\_Set\_02\_Fraction 22755 FTMS; HC 85.96 513.65 LNX2

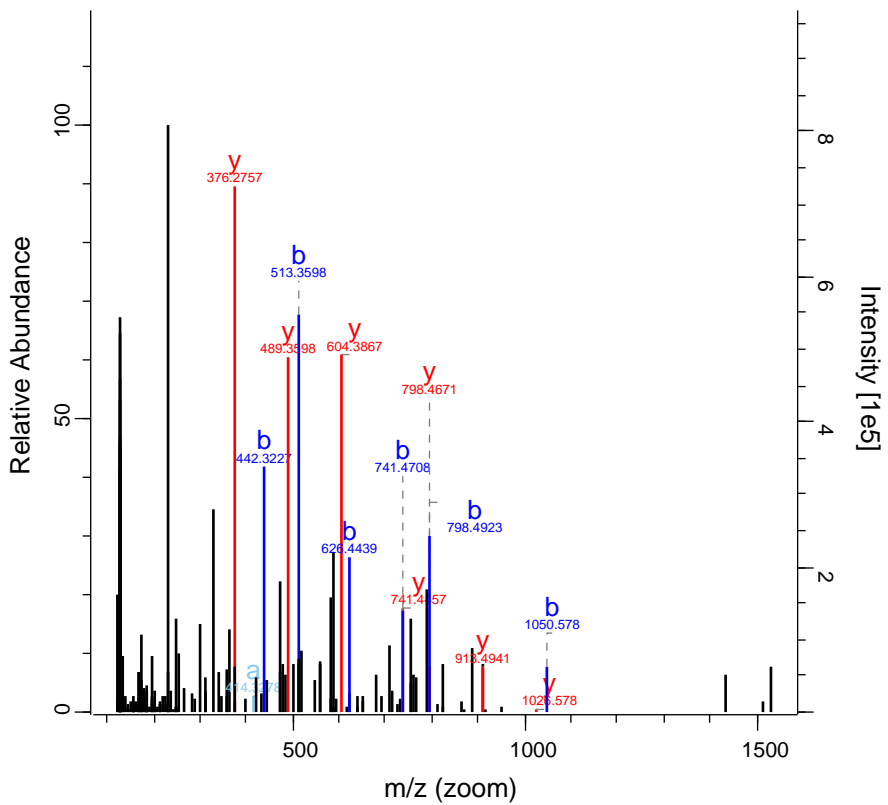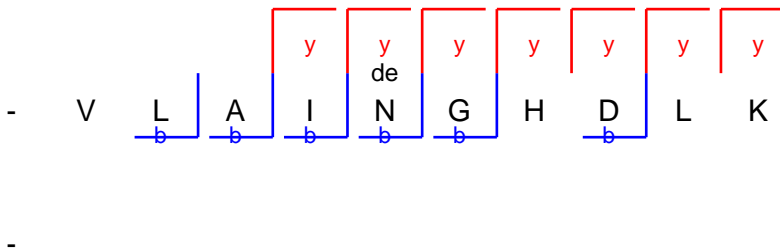

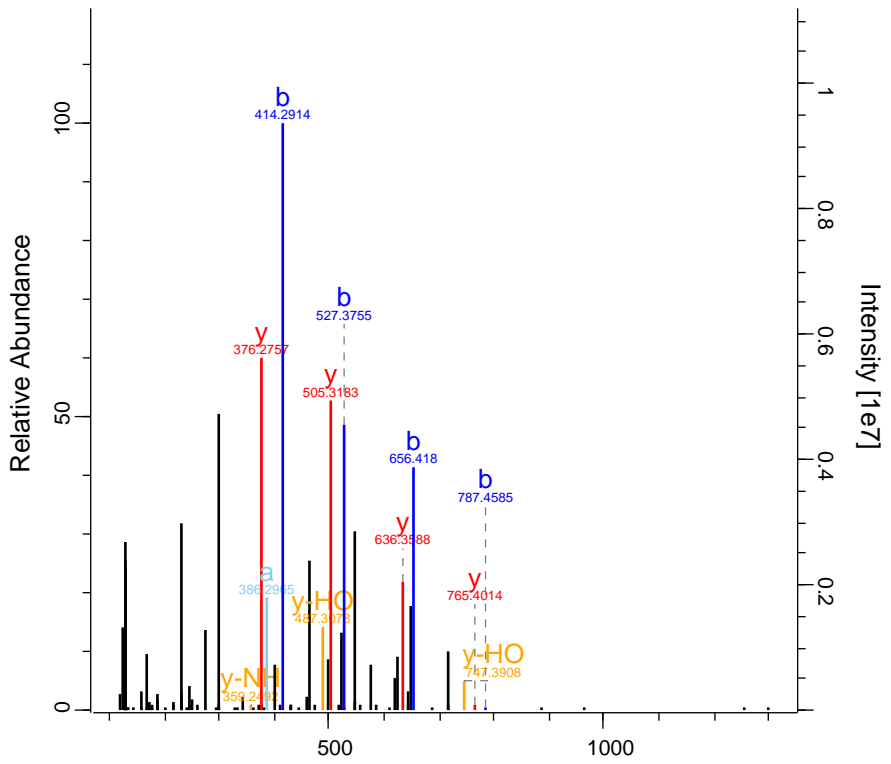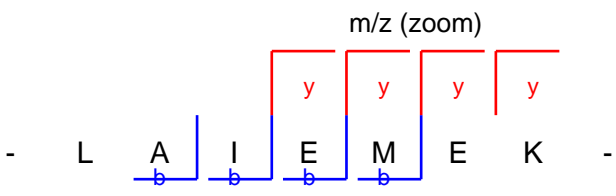



RO-QC-160121\_ZackD\_SS\_Set\_02\_Fraction 23373 FTMS; HC 63.83 689.11 BIRC5

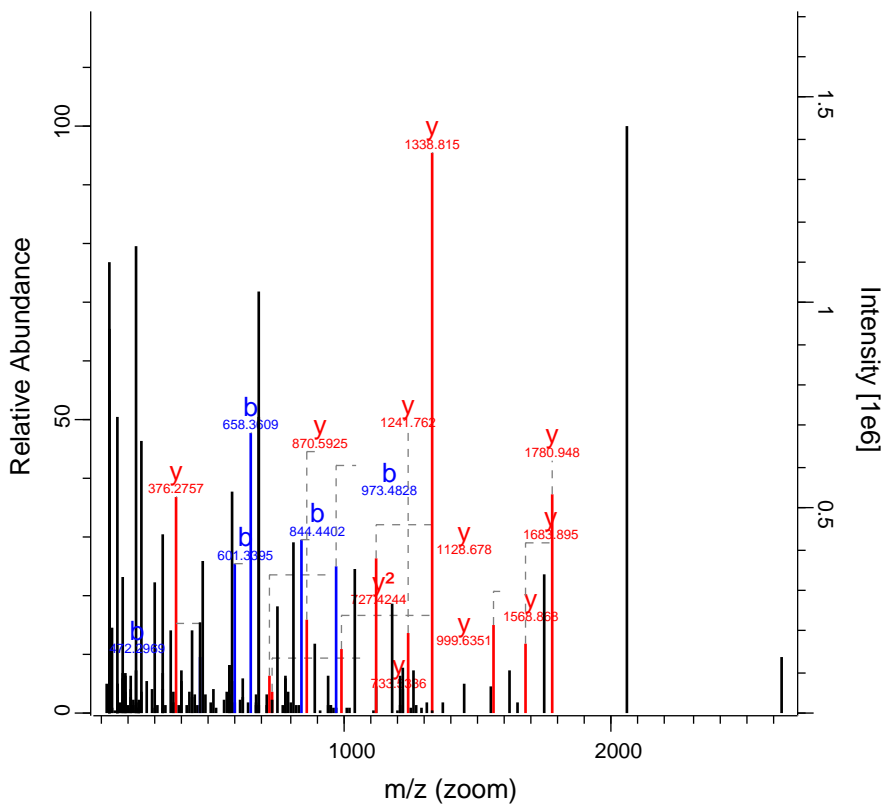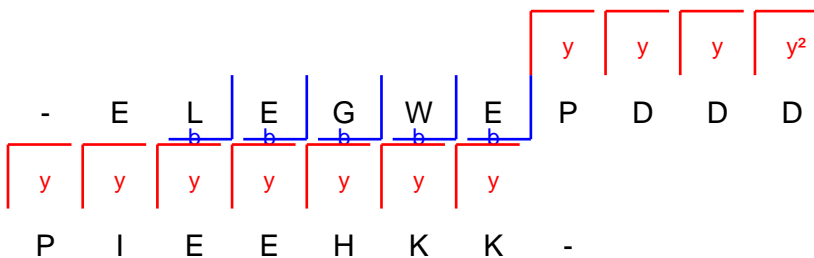

RO-QC-160121\_ZackD\_SS\_Set\_02\_Fraction 24347 FTMS; HC 87.43 794.43 ATP6V0C

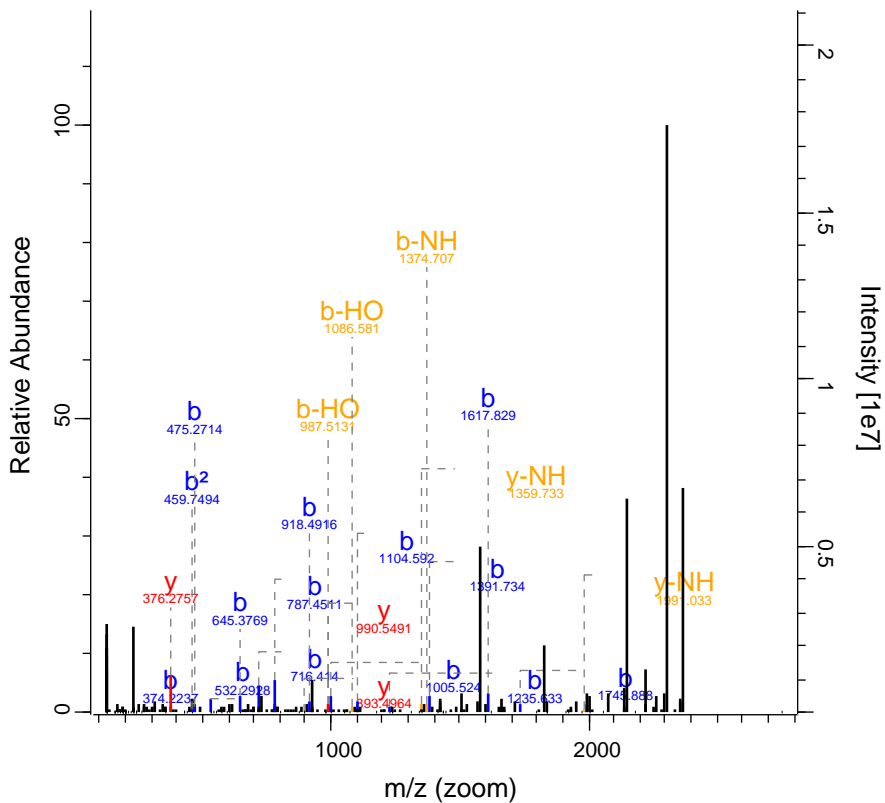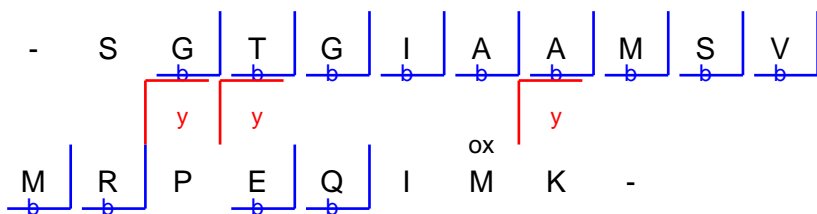

RO-QC-160121\_ZackD\_SS\_Set\_02\_Fraccio 24458 FTMS; HC 147.73 1191.14 ATP6V0C

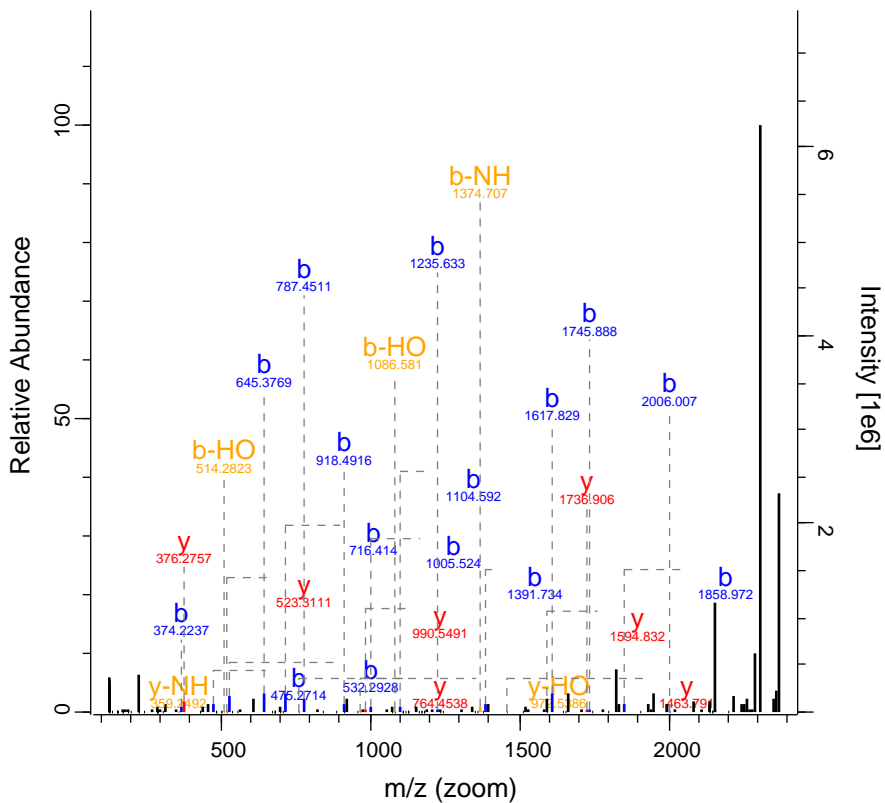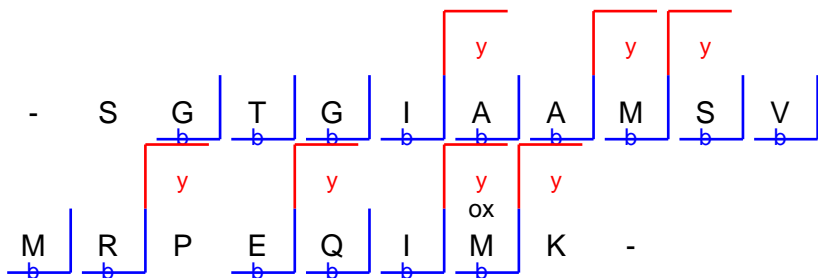

RO-QC-160121\_ZackD\_SS\_Set\_02\_Fraction 24550 FTMS; HC 79.8 794.76 ATP6V0C

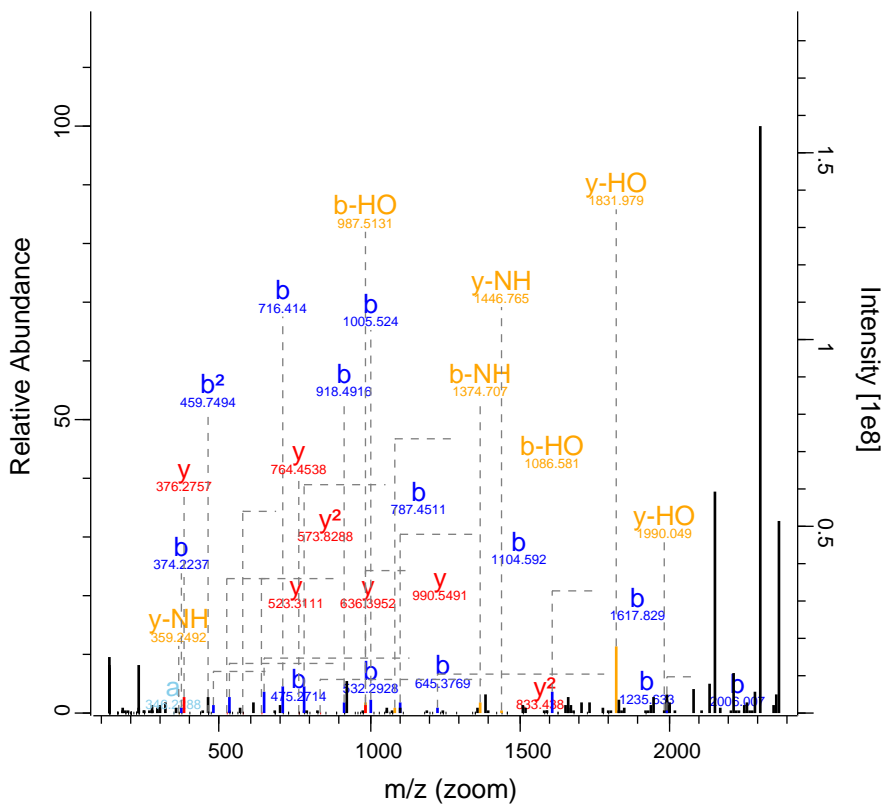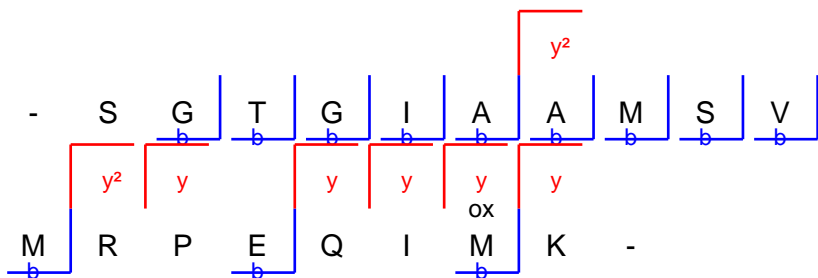

RO-QC-160121\_ZackD\_SS\_Set\_02\_Fraction 24612 FTMS; HC 87.07 884.42 TMBIM1

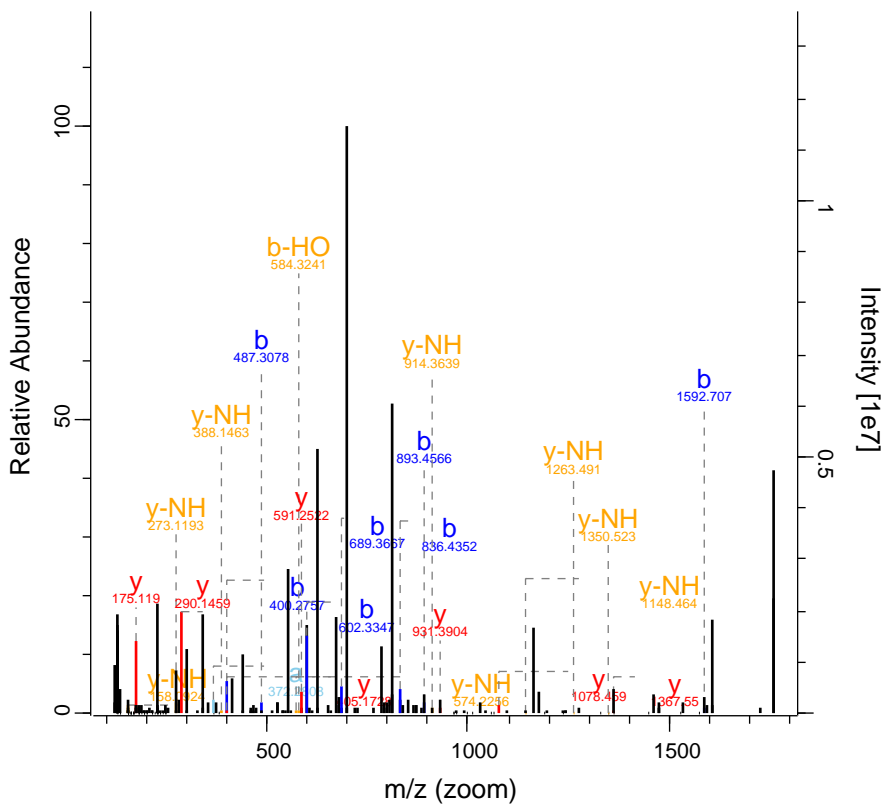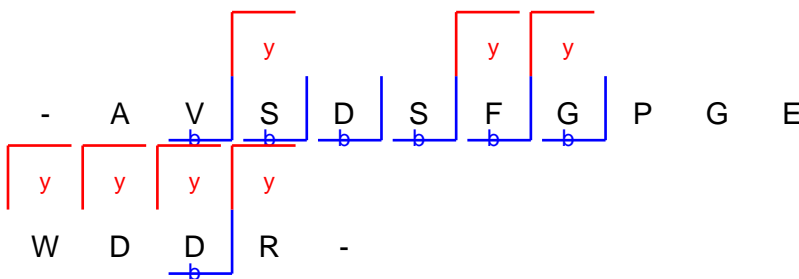

RO-QC-160121\_ZackD\_SS\_Set\_02\_Fraction 25281 FTMS; HC 163.71 880.47 CACUL1

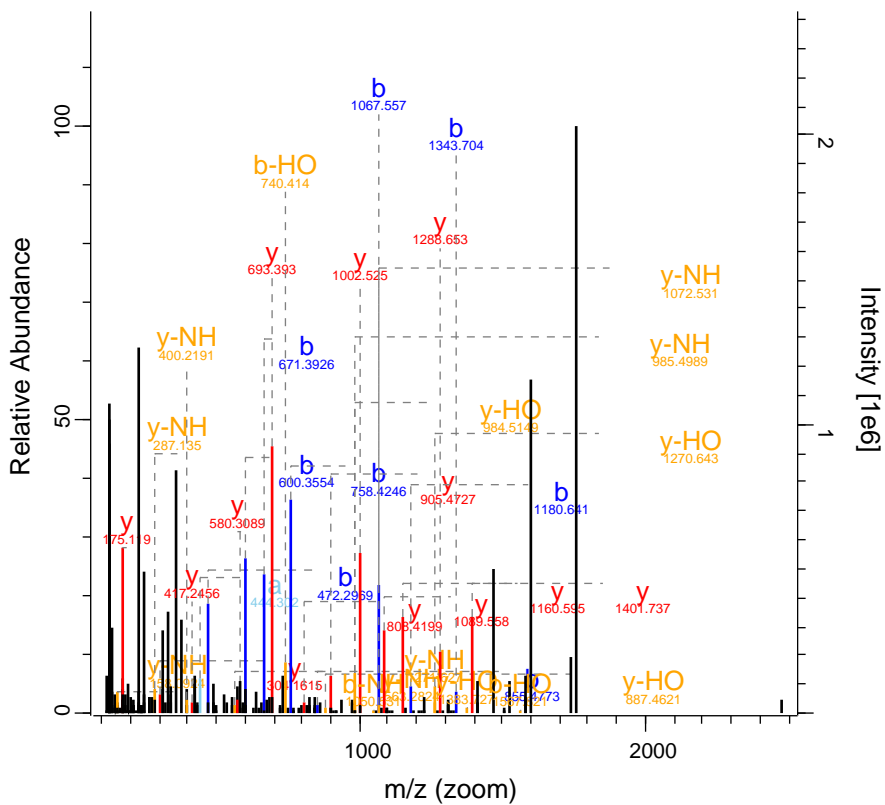

RO-QC-160121\_ZackD\_SS\_Set\_02\_Fraction 25393 FTMS; HC 161.63 818.99 DGCR8

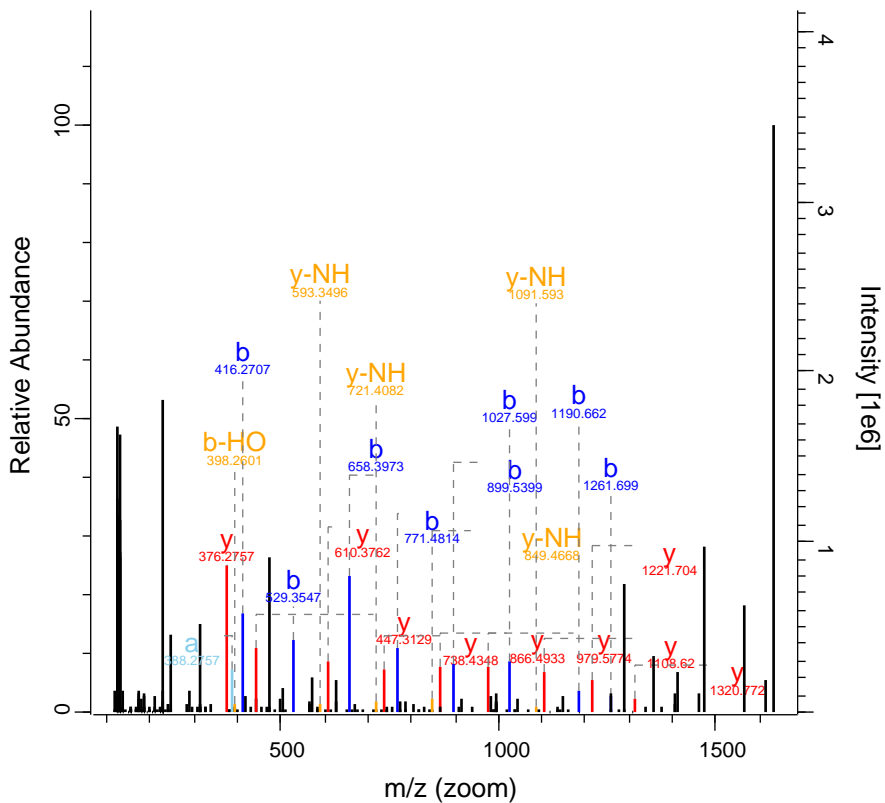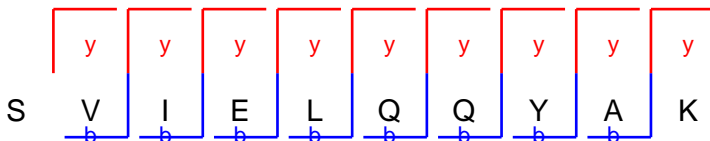

Raw File

Scan Method Score m/z

RO-QC-160121\_ZackD\_SS\_Set\_02\_Fraction\_11

27246 FTMS; HCD 49.35 639.85

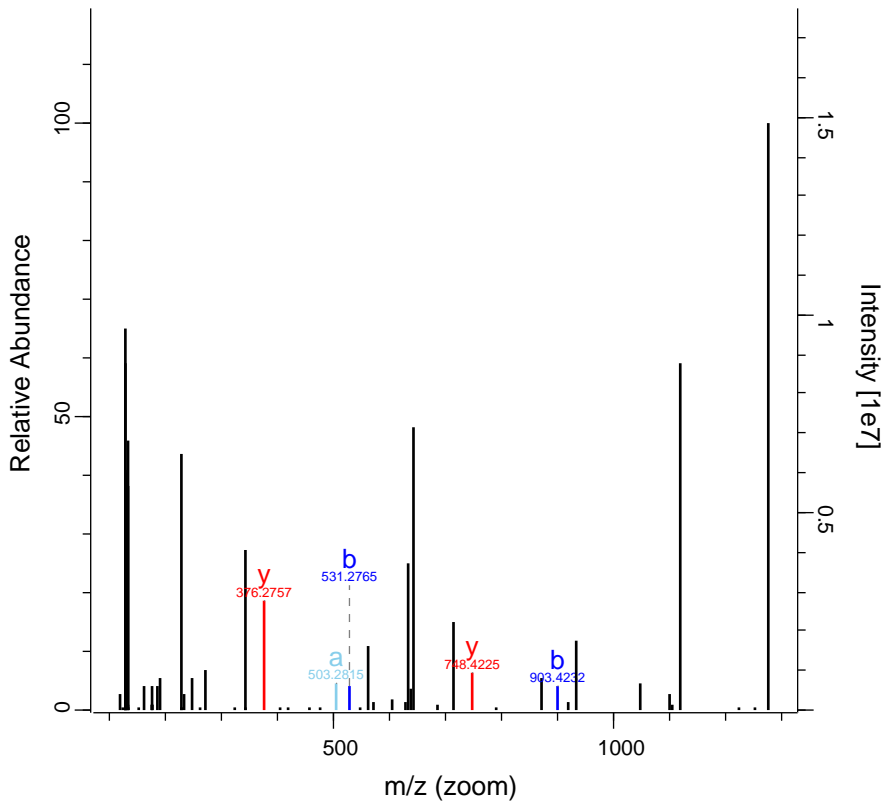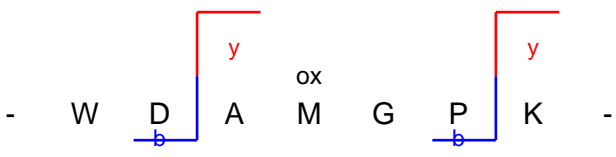



RO-QC-160121\_ZackD\_SS\_Set\_02\_Fraction 28067 FTMS; HC 109.72 841.75 CNIH4

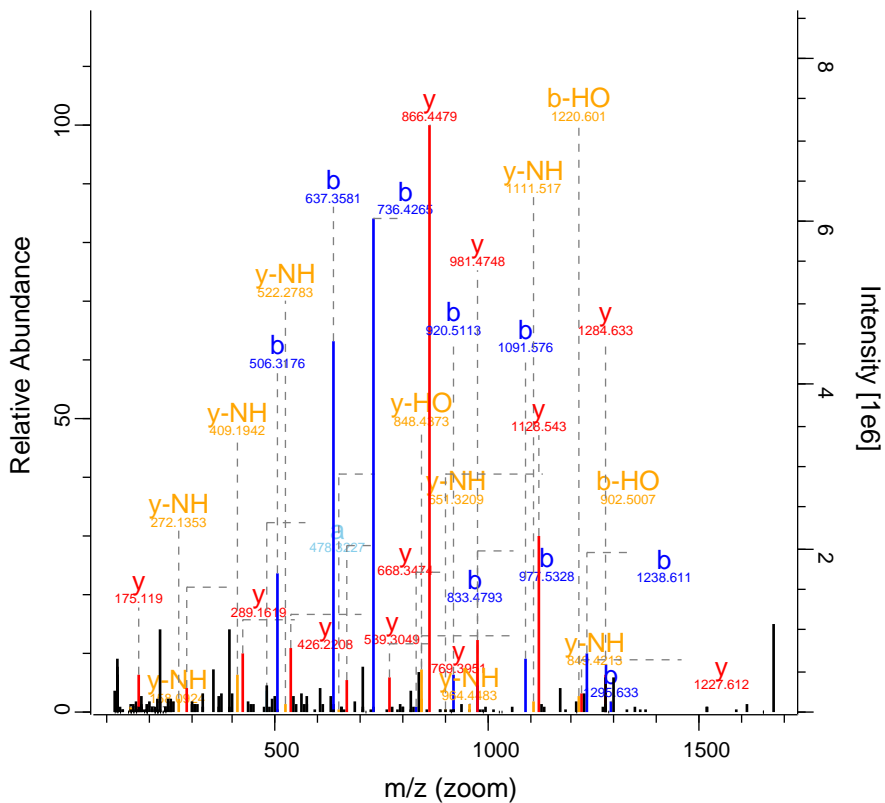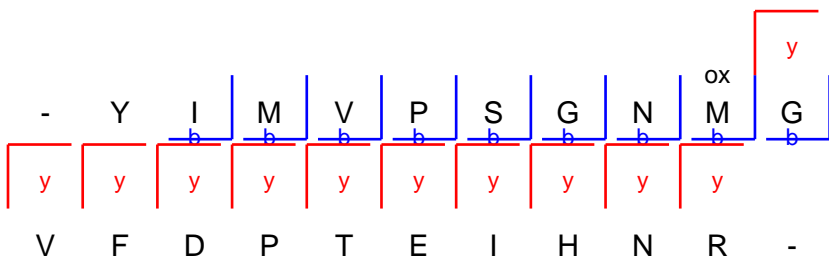

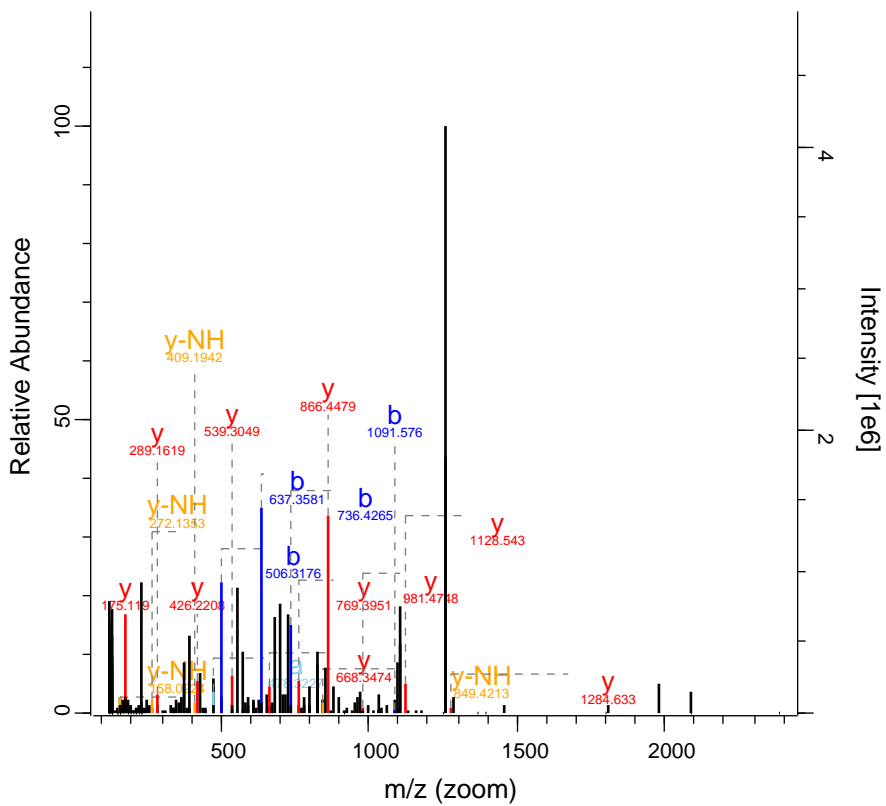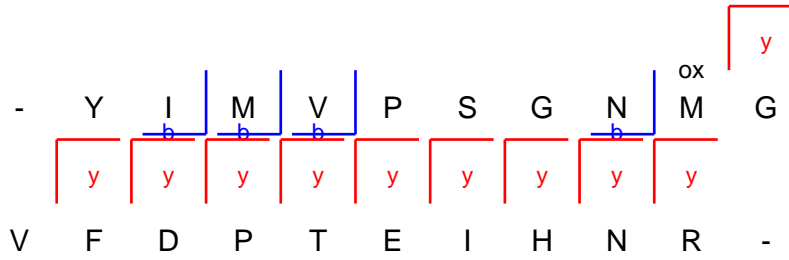

RO-QC-160121\_ZackD\_SS\_Set\_02\_Fraction 28617 FTMS; HC 60.15 666.36 TRAF4

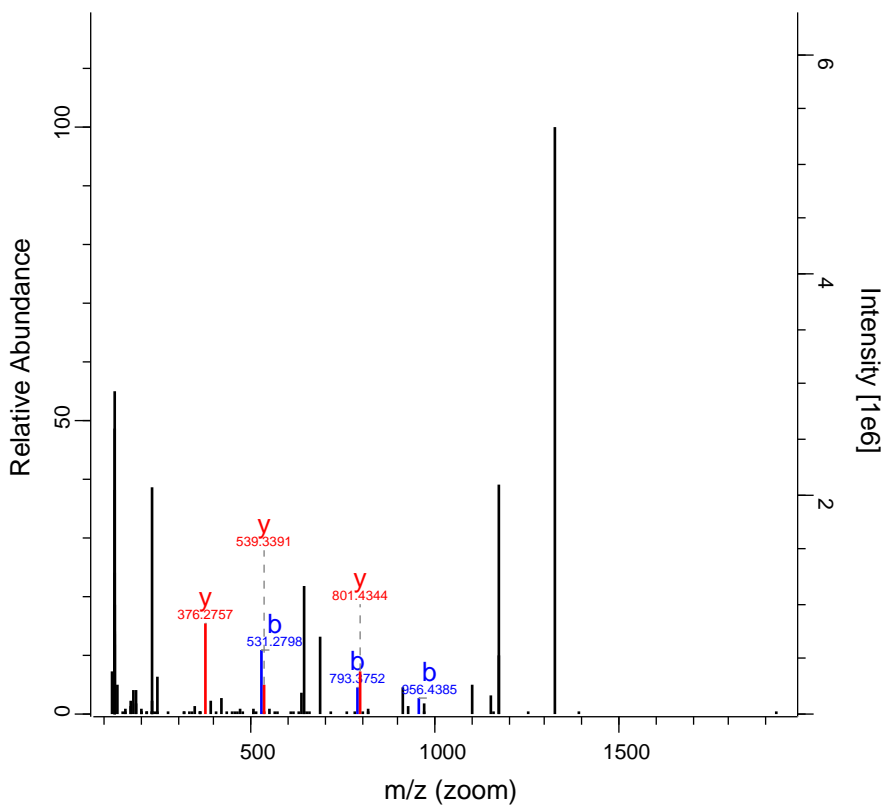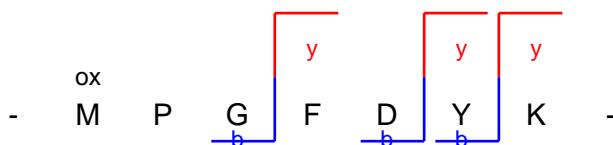

RO-QC-160121\_ZackD\_SS\_Set\_02\_Fraction 29182 FTMS; HC 122.64 704.36 EMP3

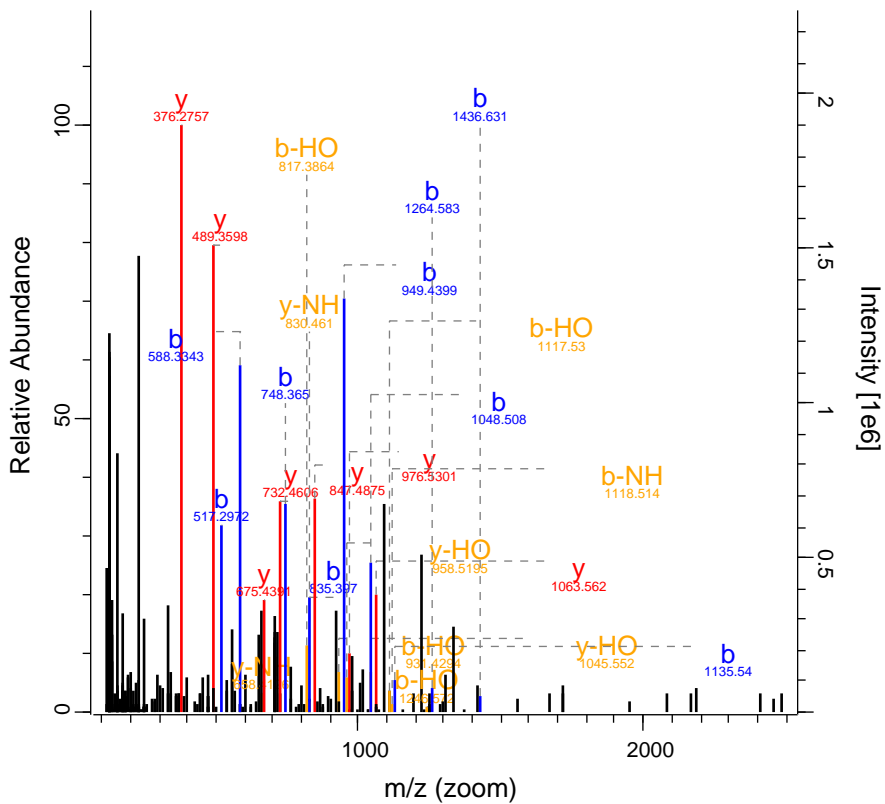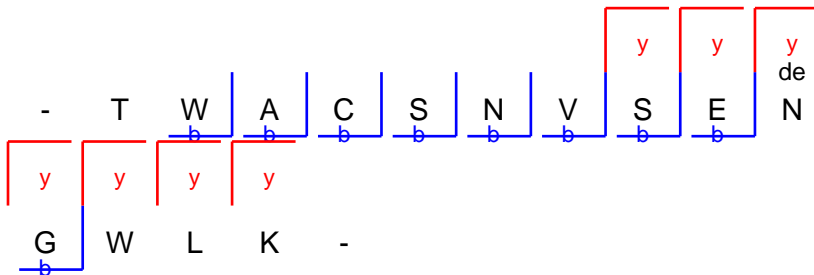

RO-QC-160121\_ZackD\_SS\_Set\_02\_Fraction 29196 FTMS; HC 232.6 1056.04 EMP3

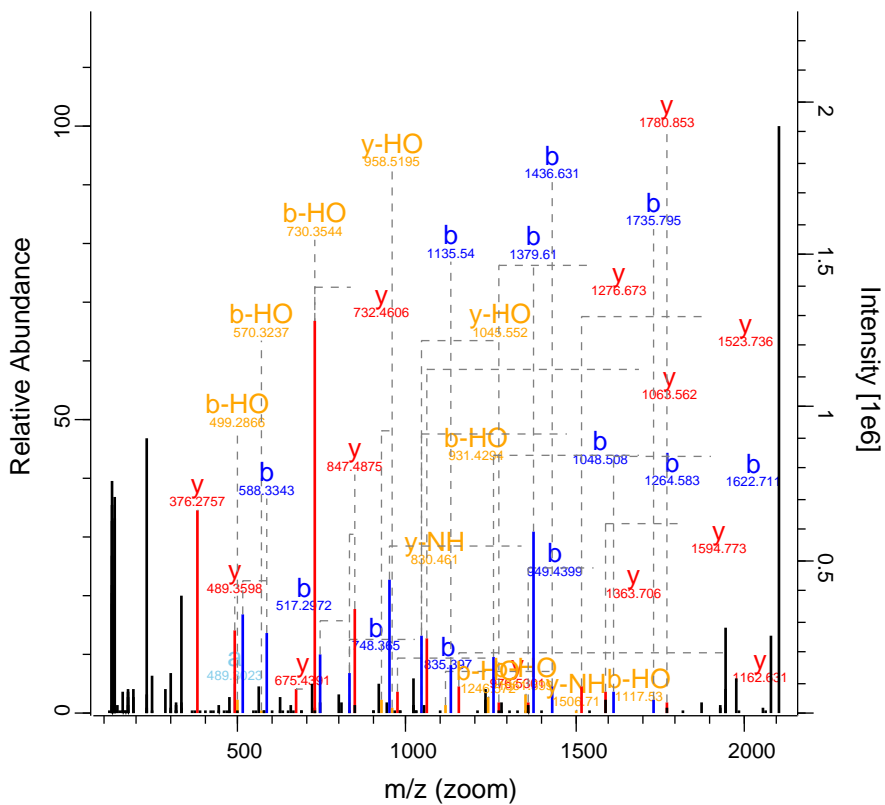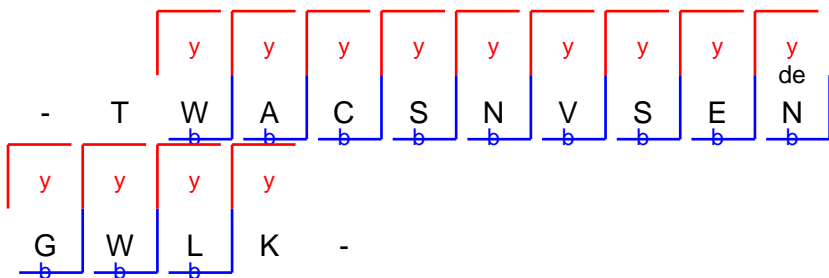

RO-QC-160121\_ZackD\_SS\_Set\_02\_Fraction 29673 FTMS; HC 57.29 715.74 SEPHS2

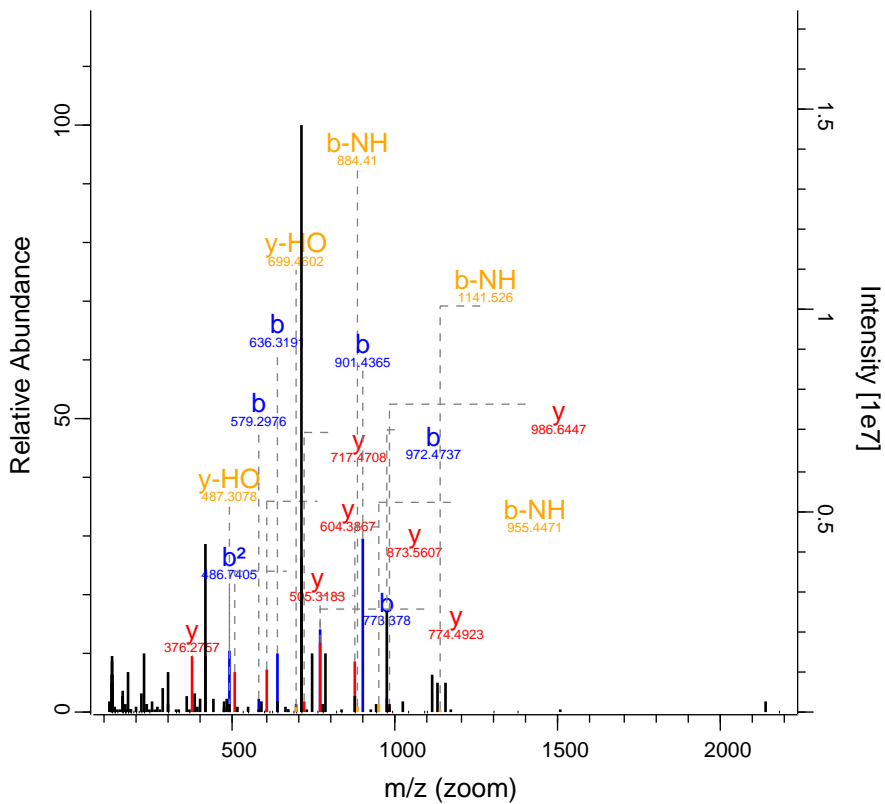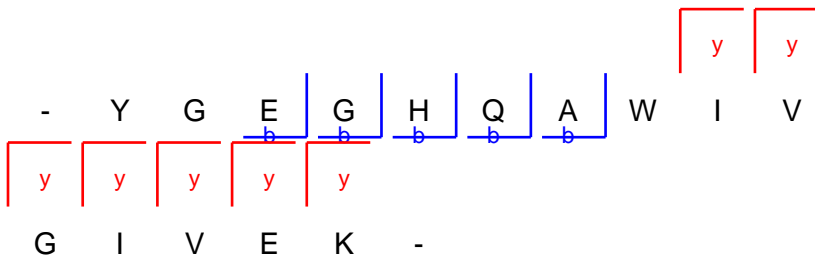

RO-QC-160121\_ZackD\_SS\_Set\_02\_Fraction 29722 FTMS; HC 80.97 825.41 TFDP1

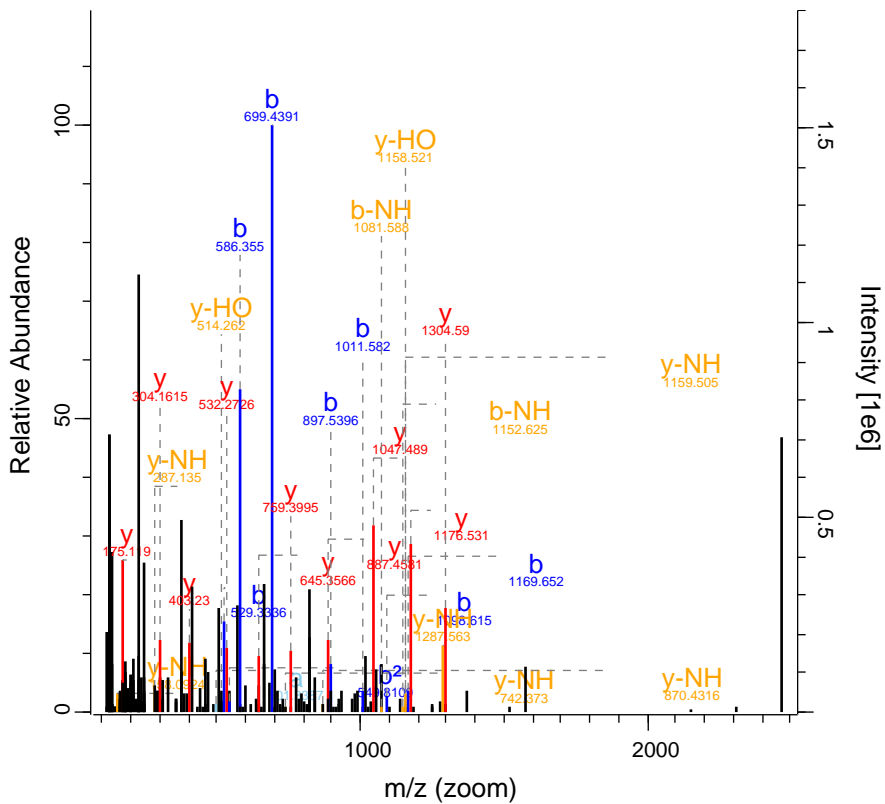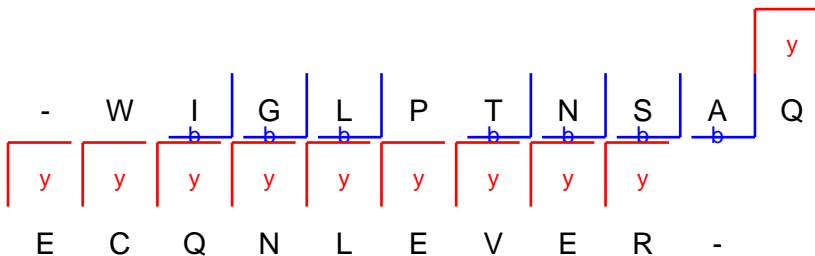

E C Q N L E V E R -

RO-QC-160121\_ZackD\_SS\_Set\_02\_Fraction\_30660 FTMS; HC 149.96 815 ARL10

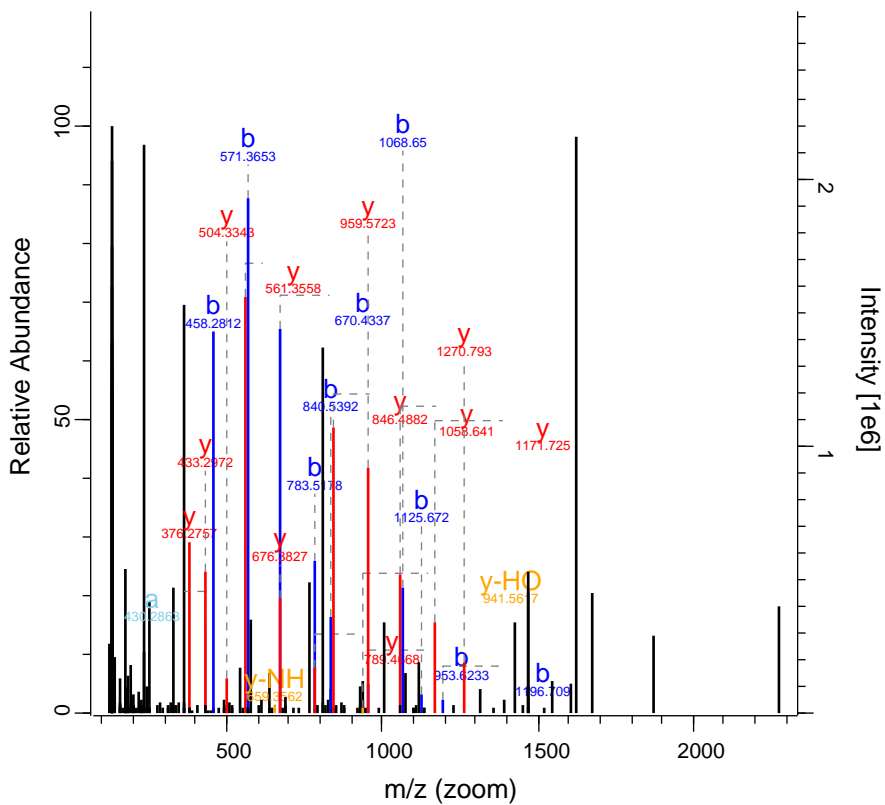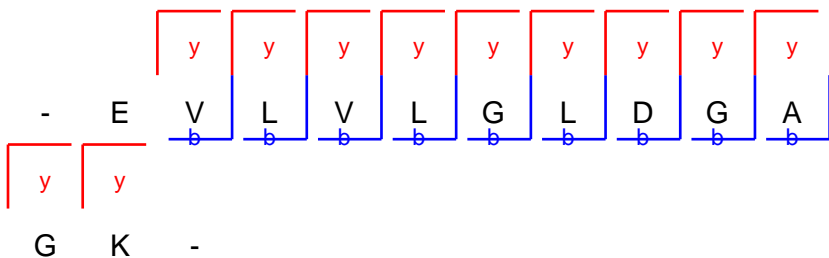

G K -



RO-QC-160121\_ZackD\_SS\_Set\_02\_Fraction 30702 FTMS; HC 55.84 648.36 CLK3

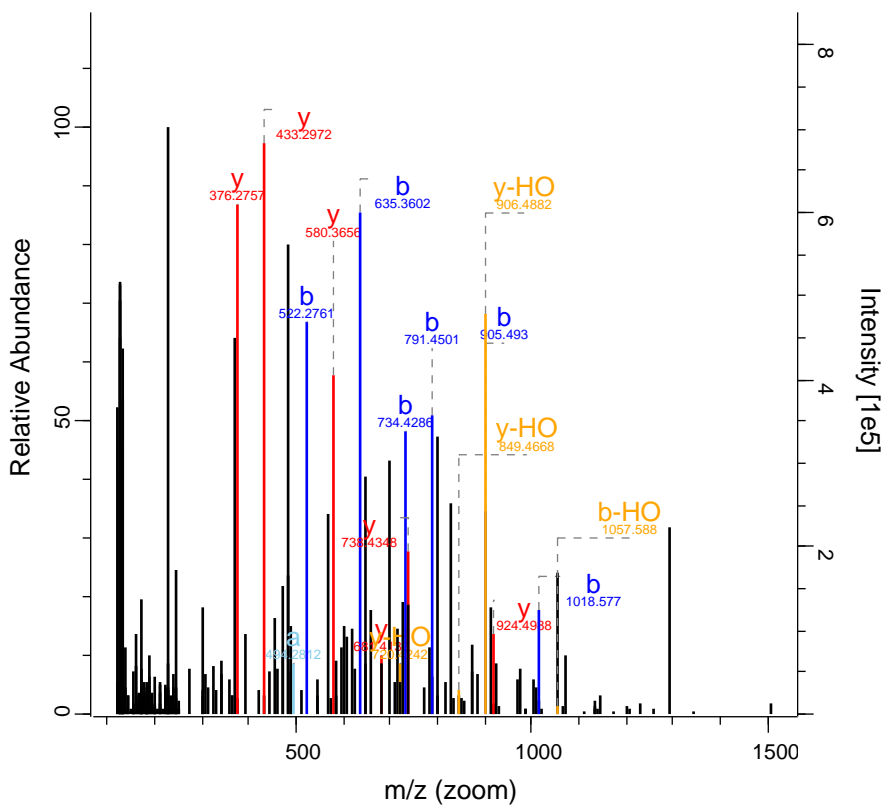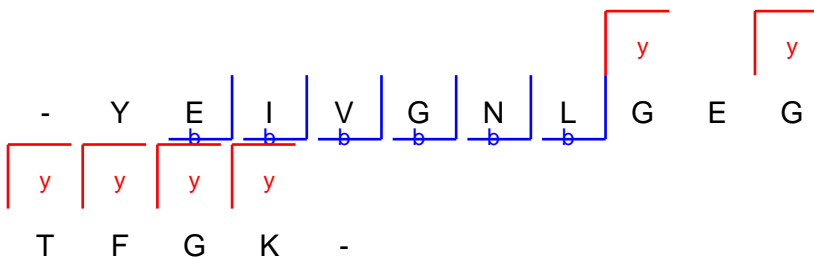

T F G K -

RO-QC-160121\_ZackD\_SS\_Set\_02\_Fraction 31368 FTMS; HC 177.36 651.9 SHISA4

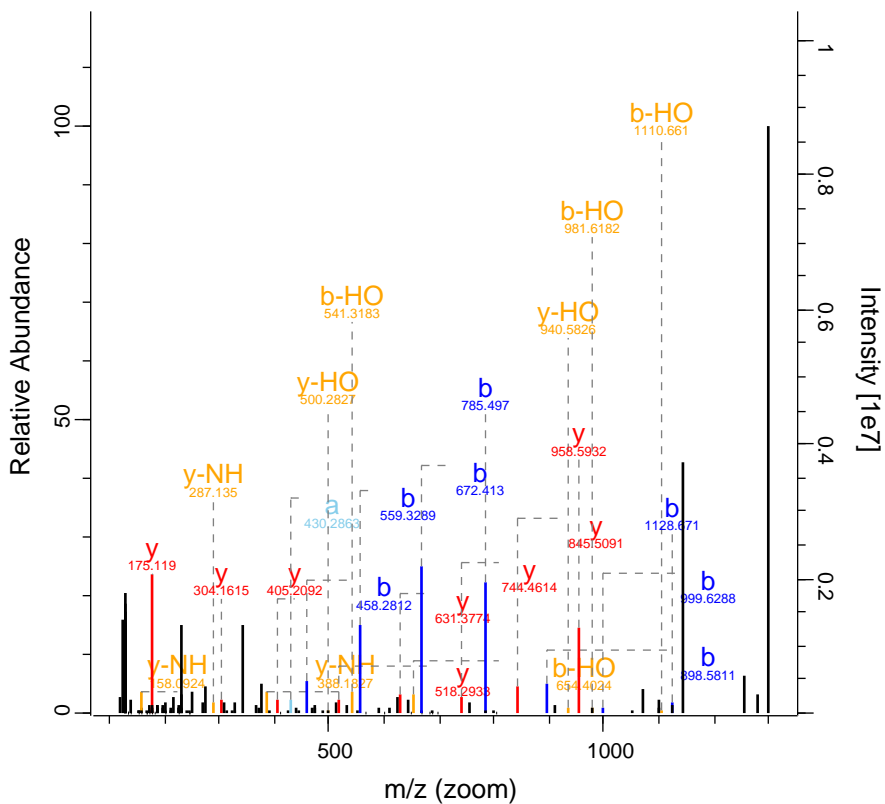

m/z (zoom)

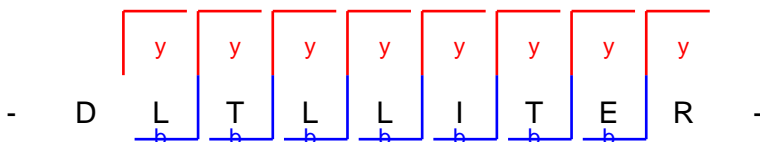

RO-QC-160121\_ZackD\_SS\_Set\_02\_Fraction 32764 FTMS; HC 40.35 562.97 LMO2

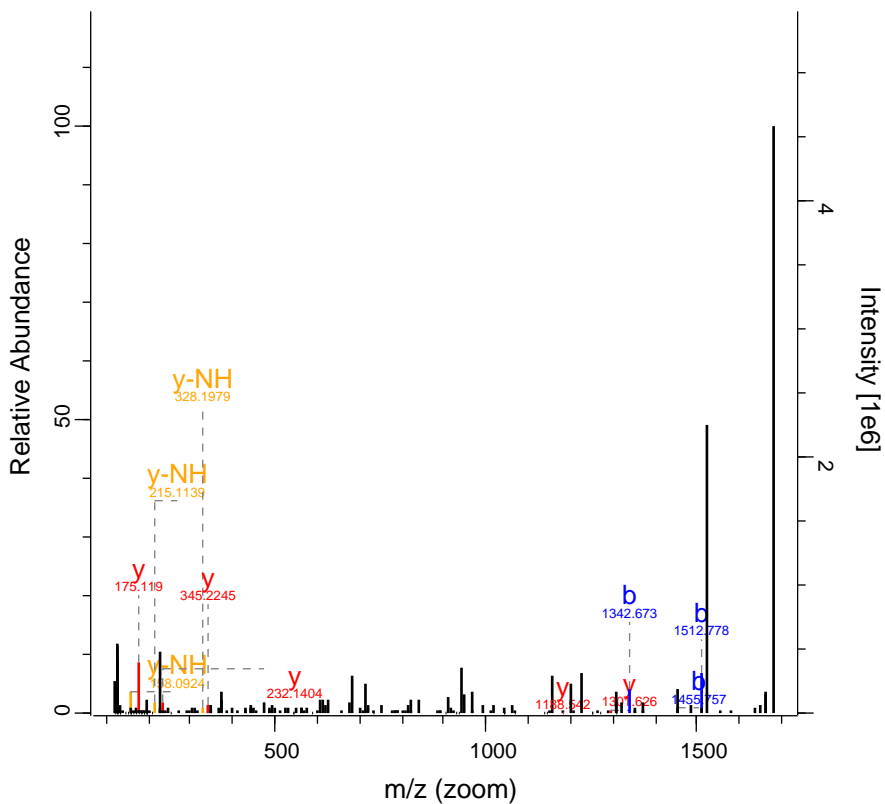

m/z (zoom)

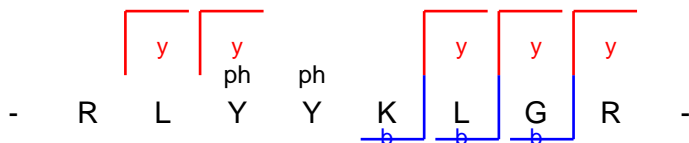

RO-QC-160121\_ZackD\_SS\_Set\_02\_Fraction 34581 FTMS; HC 84.41 734.77 EFCAB14

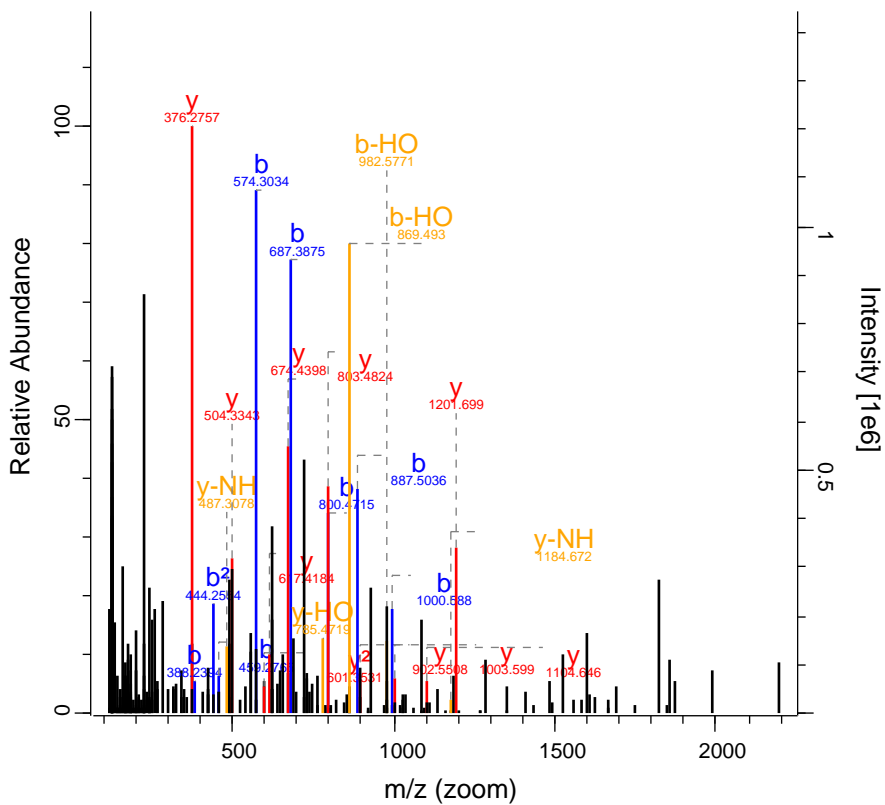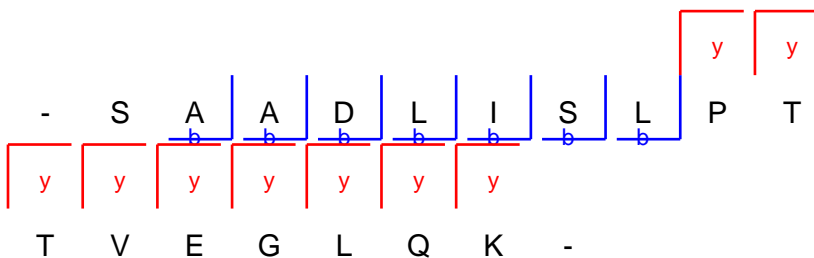

RO-QC-160121\_ZackD\_SS\_Set\_02\_Fraction 35175 FTMS; HC 83.11 778.42 IGHG1

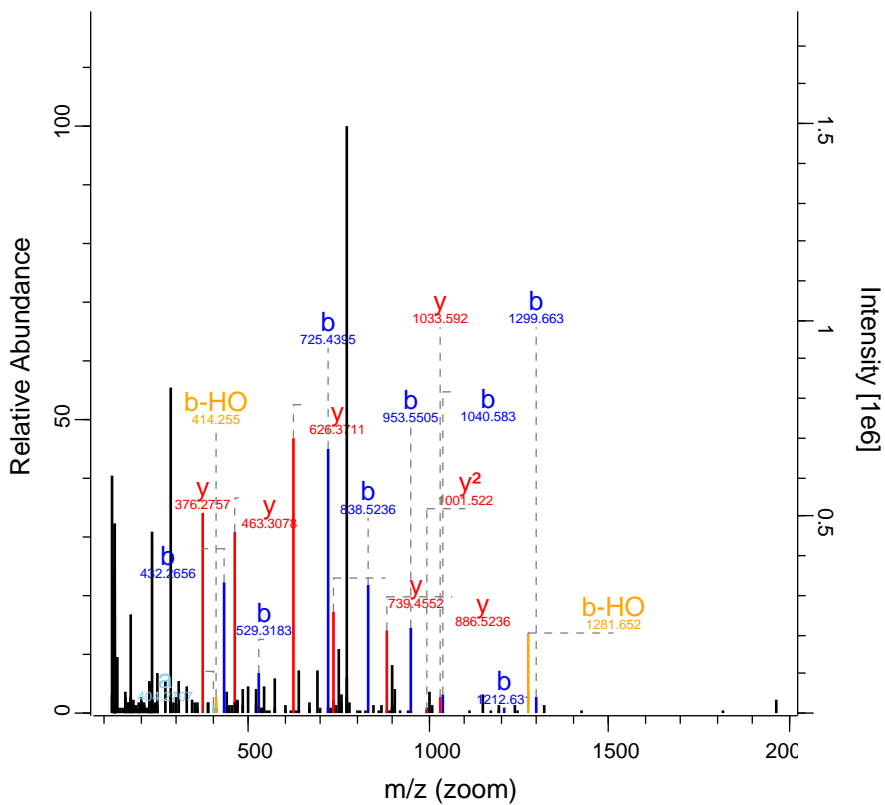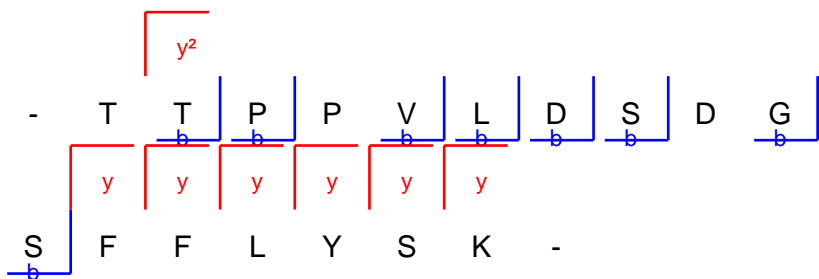

RO-QC-160121\_ZackD\_SS\_Set\_02\_Fraction 35267 FTMS; HC 69.19 837.79 C7orf26

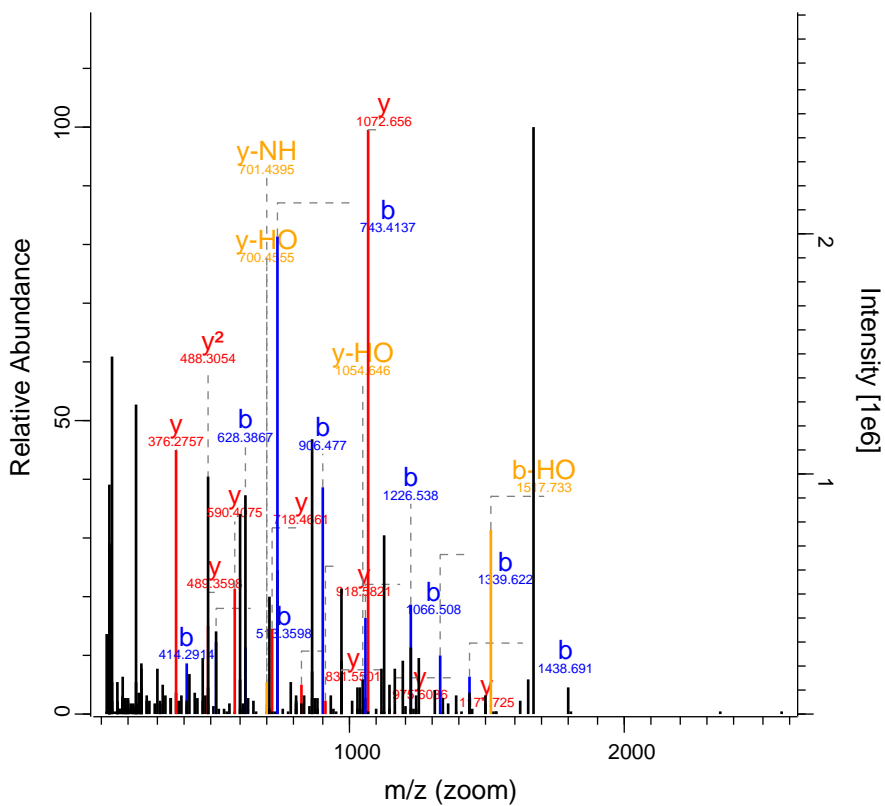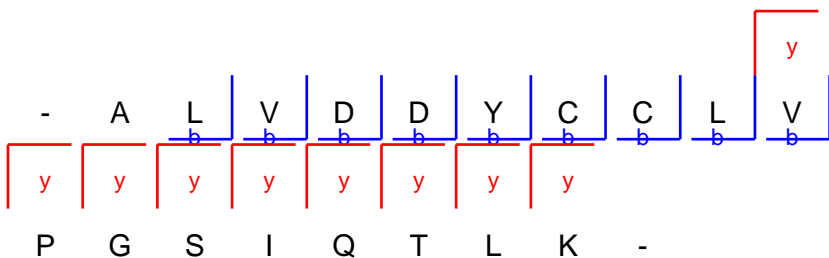

RO-QC-160121\_ZackD\_SS\_Set\_02\_Fraction1 35737 FTMS; HC 107.72 853.47 CLN8

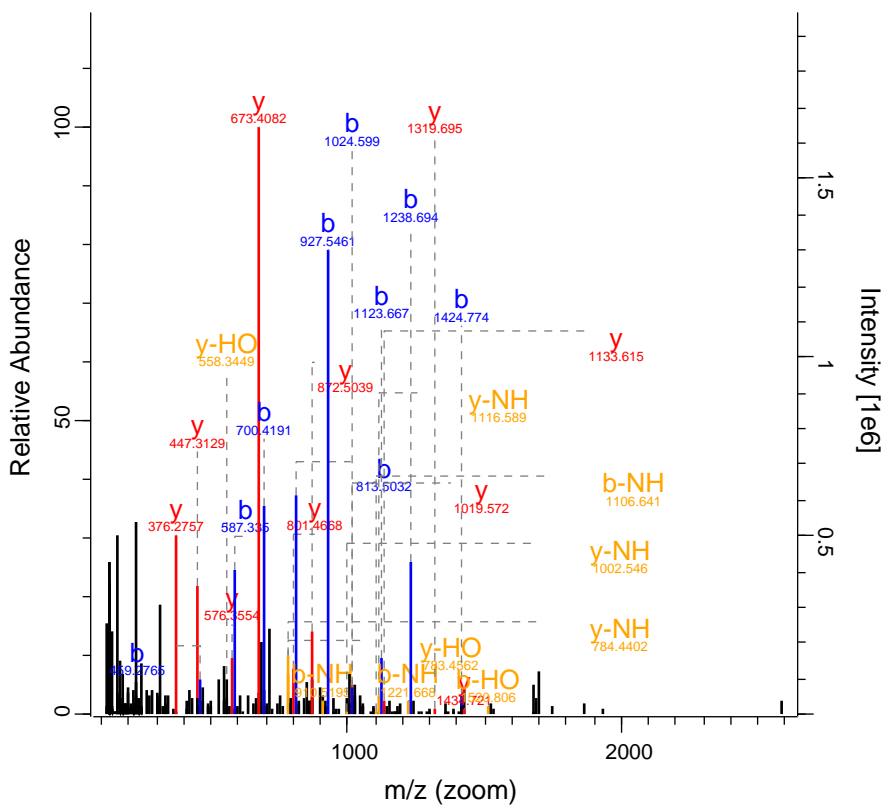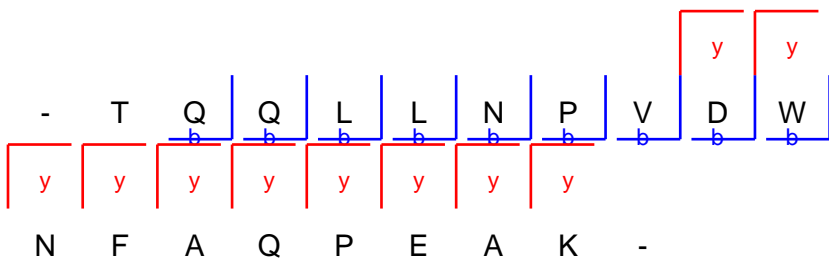

RO-QC-160121\_ZackD\_SS\_Set\_02\_Fraction 35761 FTMS; HC 149.47 853.13 CLN8

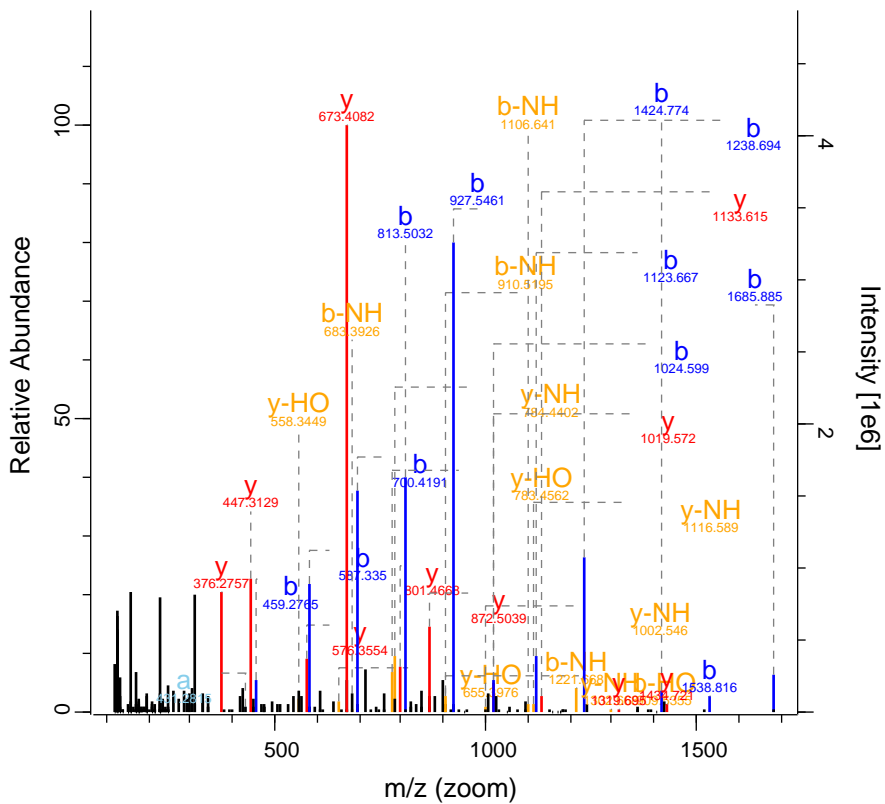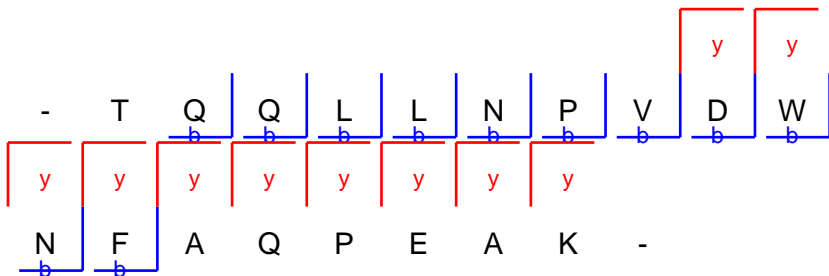



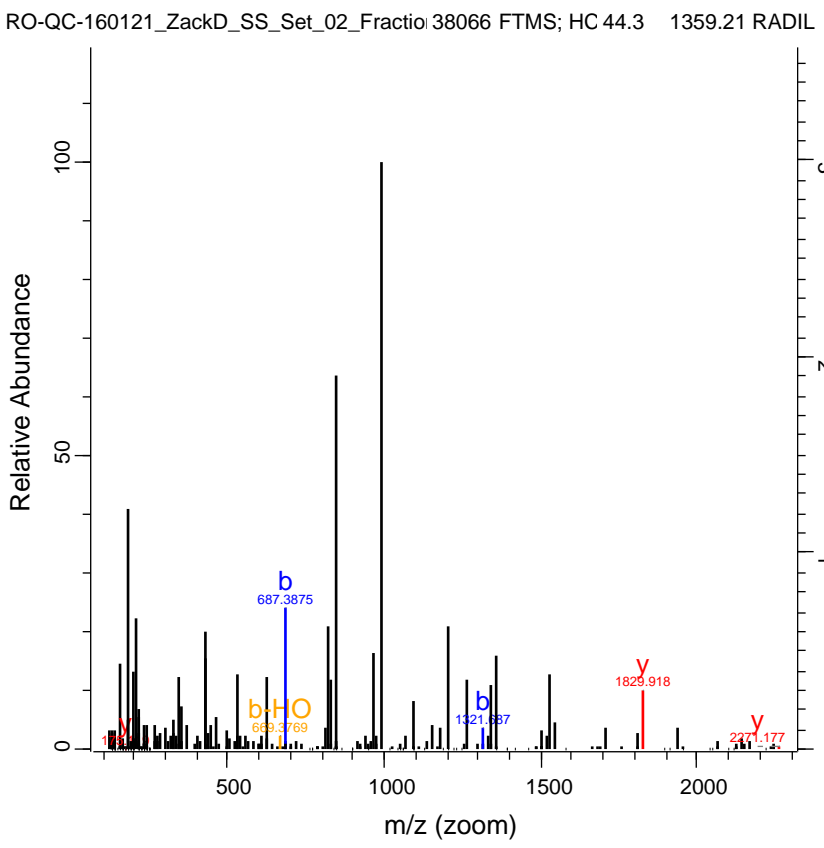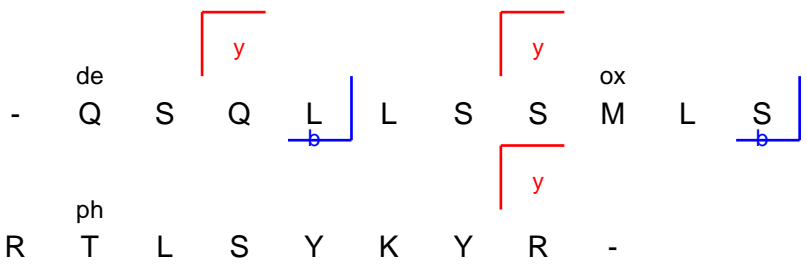

RO-QC-160121\_ZackD\_SS\_Set\_02\_Fraction 38192 FTMS; HC 94.3 993.52 TOMM7

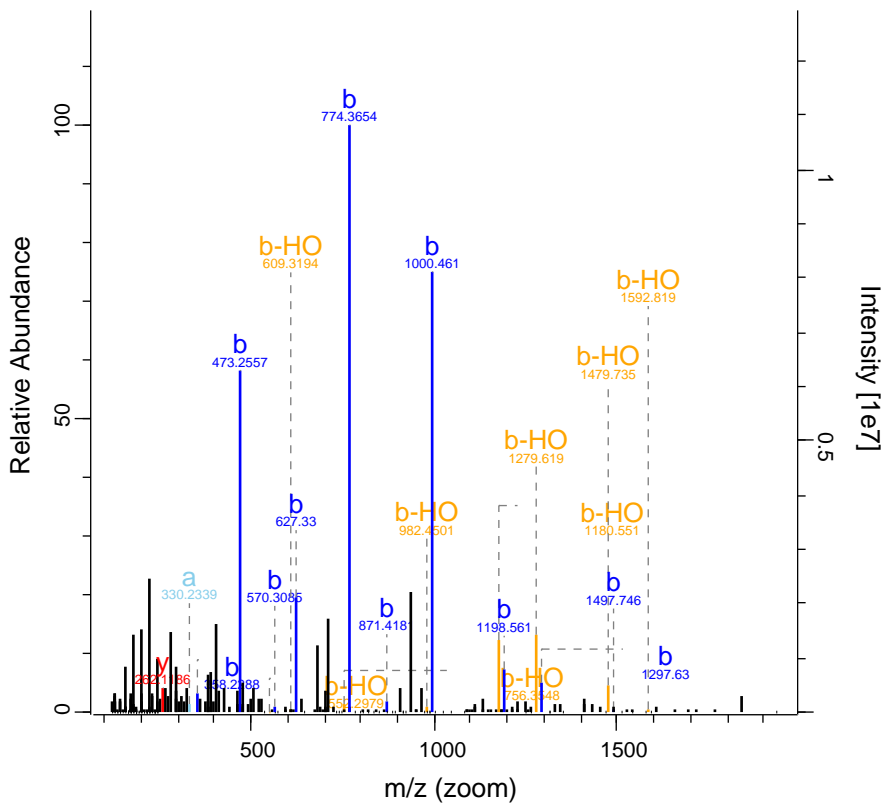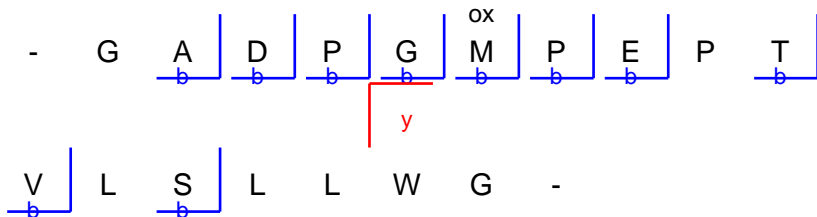

RO-QC-160121\_ZackD\_SS\_Set\_02\_Fraction 38304 FTMS; HC 40.8 657.35 TOMM7

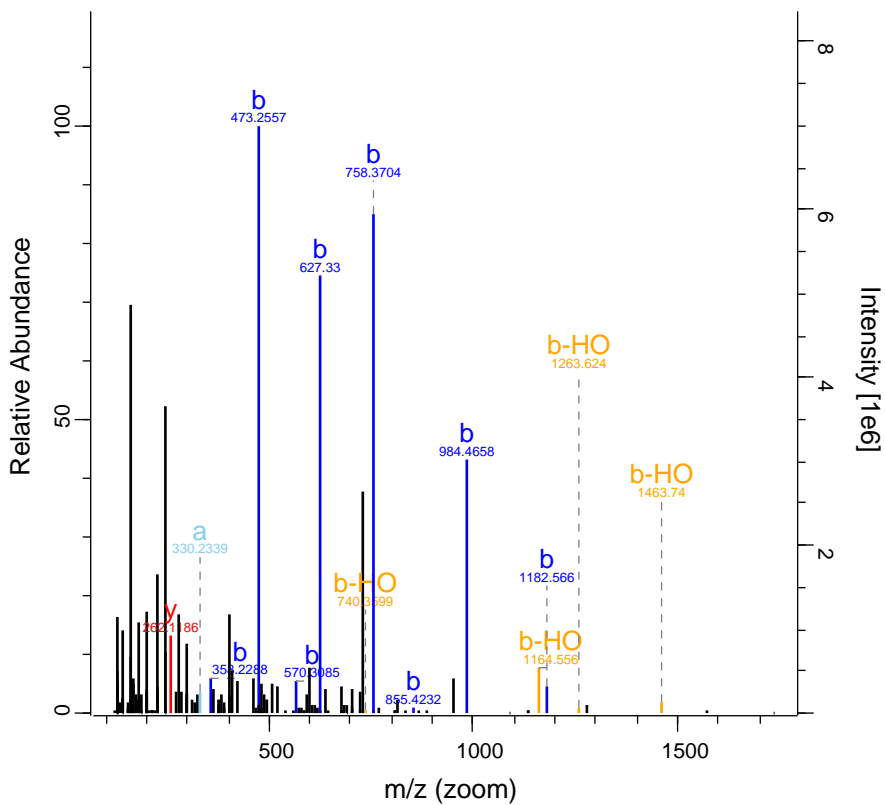

- G A D P G M P E P T  
 V L S L L W G -

The peptide sequence is GADPGMPET. The fragmentation pattern shows b-ions (blue) and b-HO ions (orange) corresponding to the sequence. A red 'y' label is also present, indicating a y-ion.

RO-QC-160121\_ZackD\_SS\_Set\_02\_Fraction 4997 FTMS; HC 64.82 488.27 PITPNM2

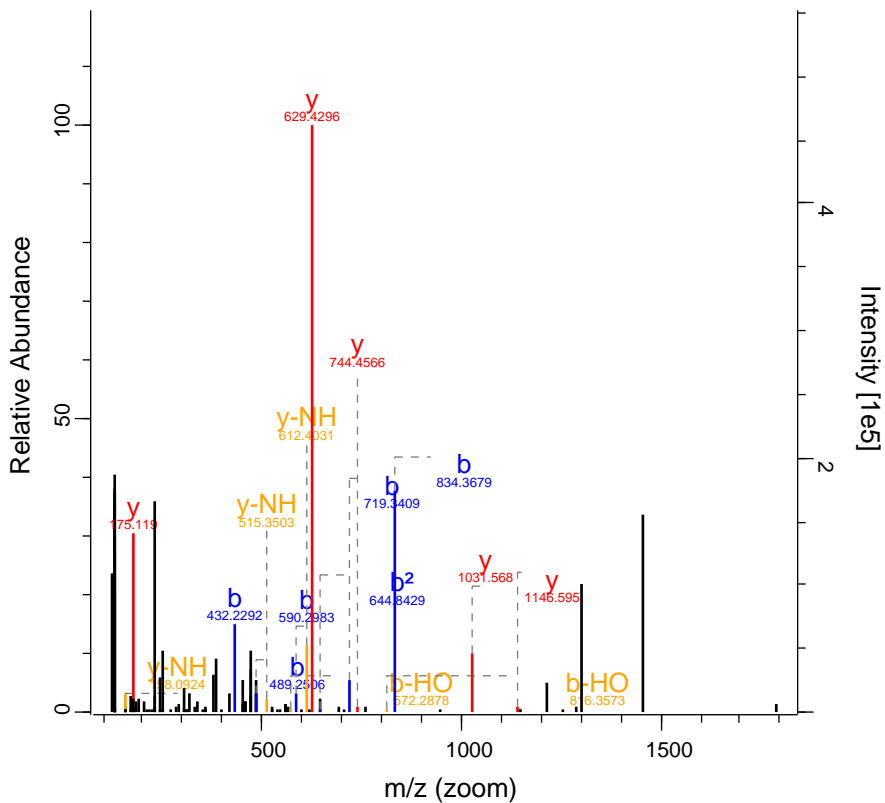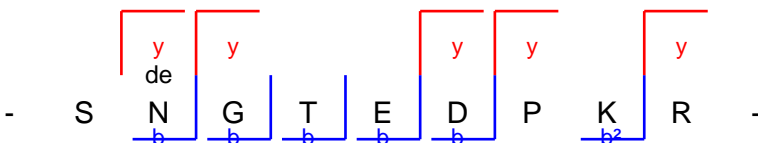

RO-QC-160121\_ZackD\_SS\_Set\_02\_Fraction 5142 FTMS; HC 56.01 641.84 PDE5A

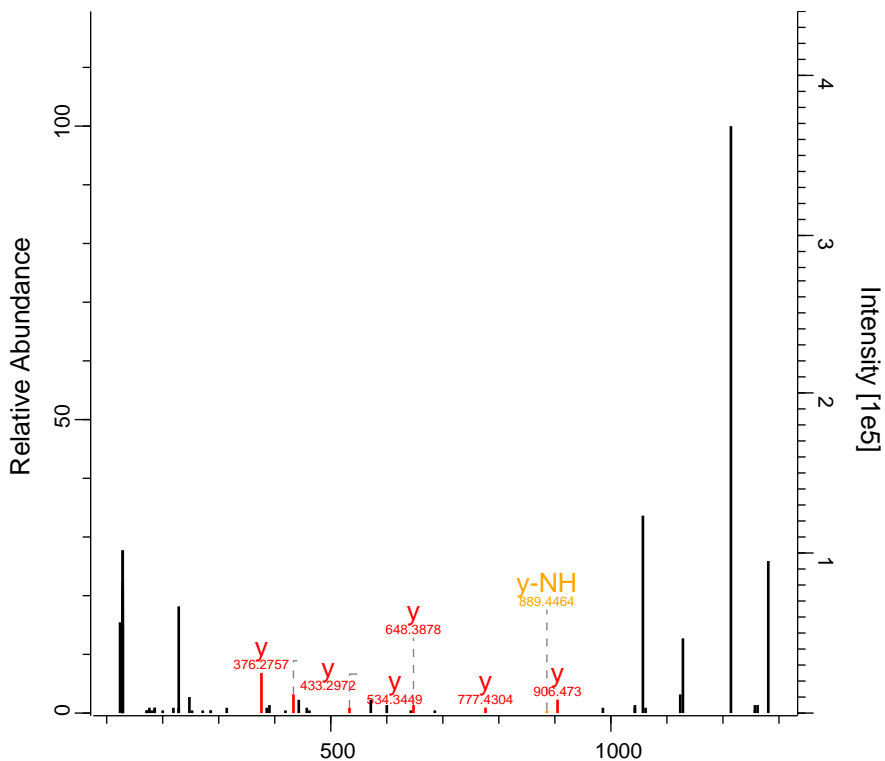

m/z (zoom)

ox

y y y y y y

- M E E N T G K -

RO-QC-160121\_ZackD\_SS\_Set\_02\_Fraction\_5235 FTMS; HCl 100.45 390 ODC1

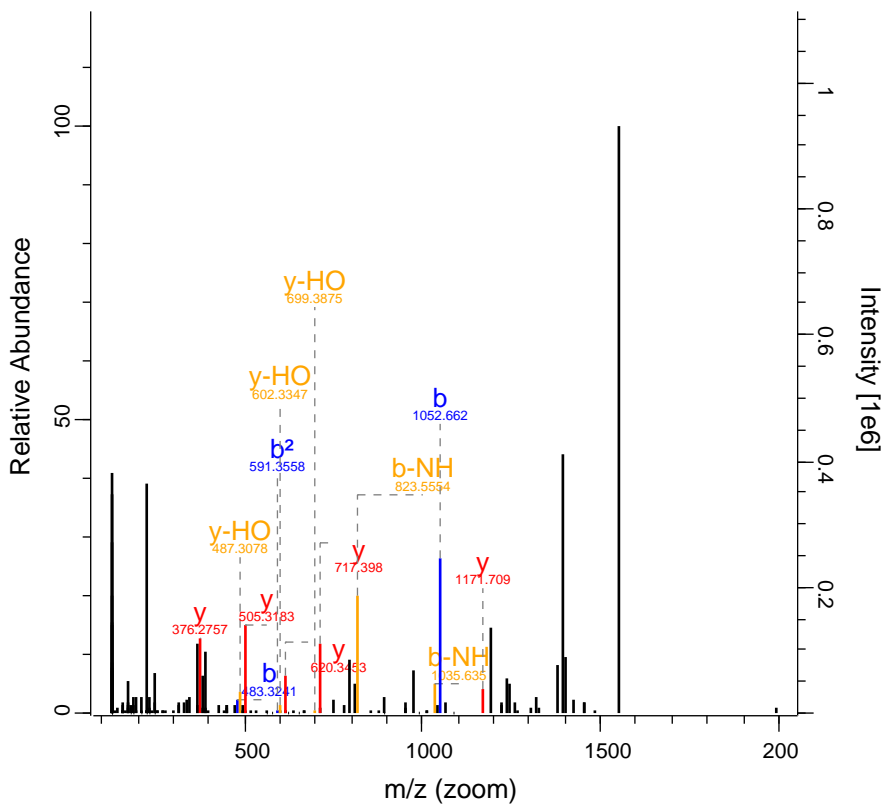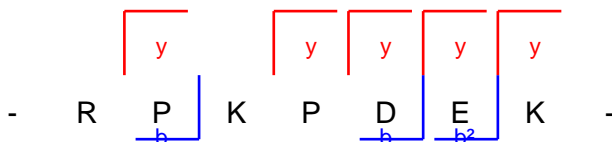

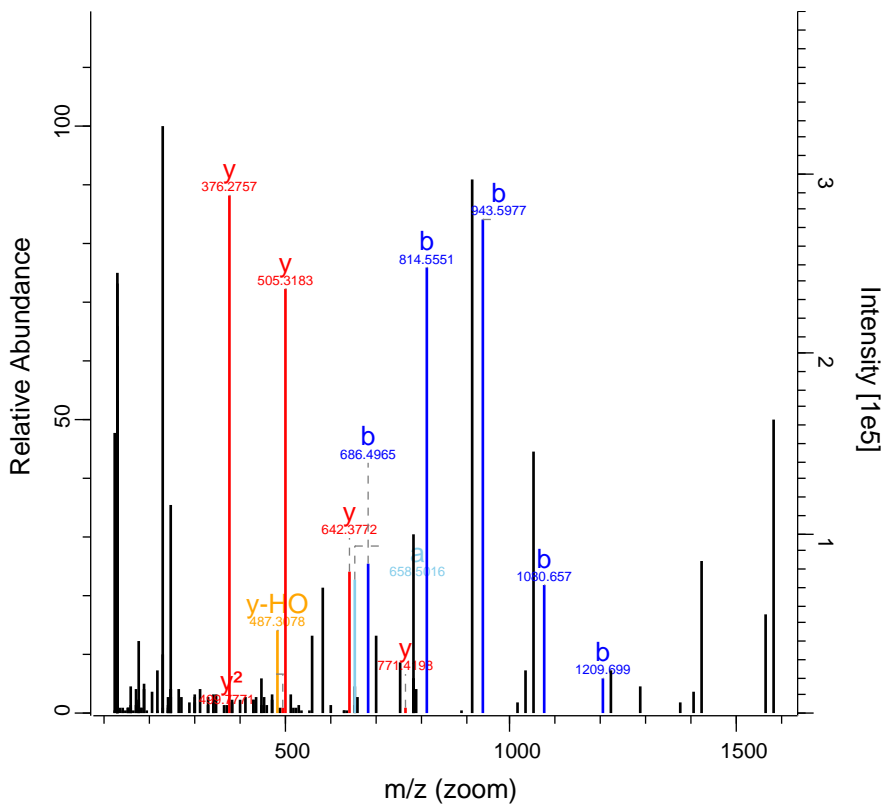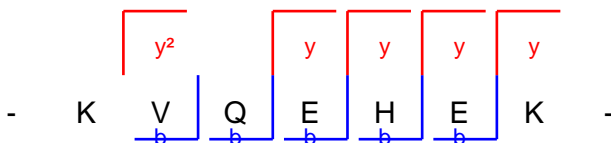

RO-QC-160121\_ZackD\_SS\_Set\_02\_Fraction 5366 FTMS; HC 58.92 722.37 TRPS1

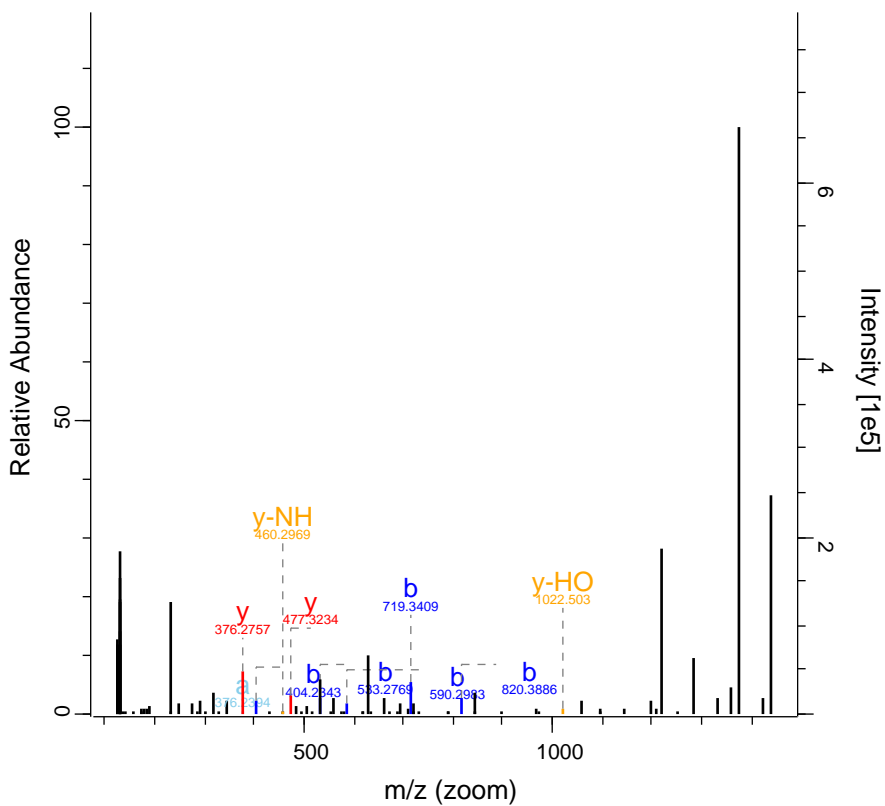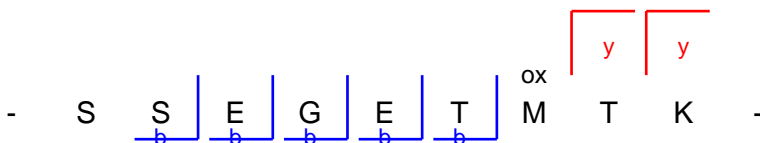



RO-QC-160121\_ZackD\_SS\_Set\_02\_Fraction 5370 FTMS; HC 81.95 683.83 LMBR1

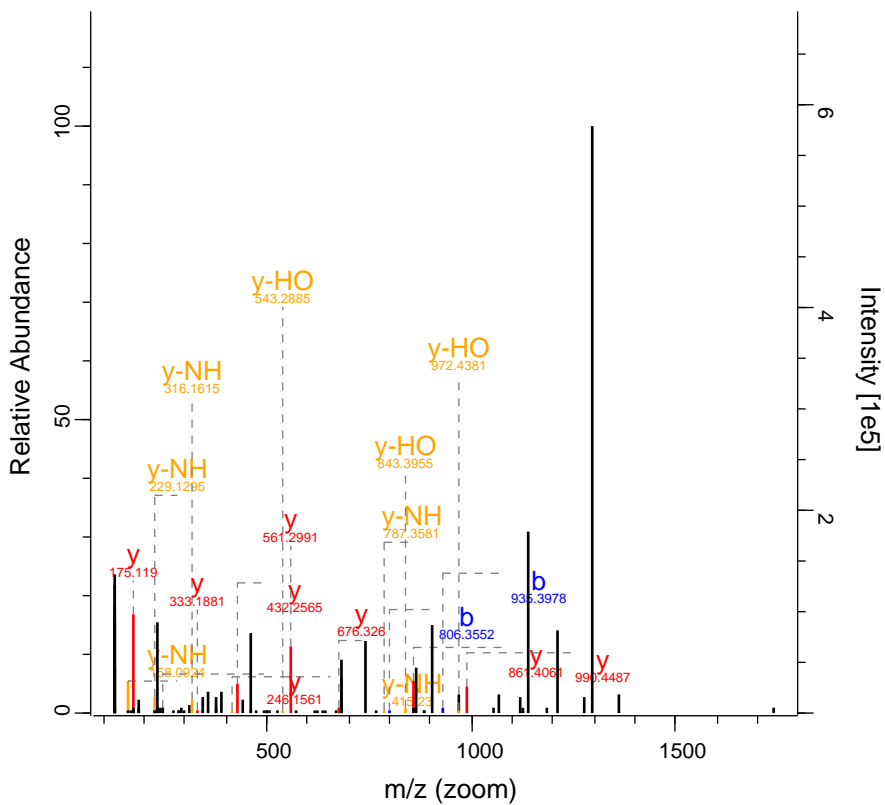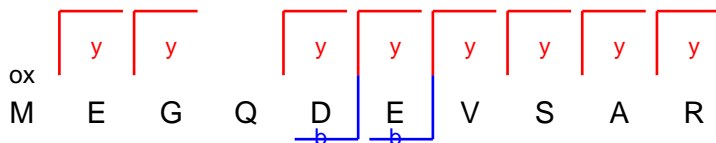

RO-QC-160121\_ZackD\_SS\_Set\_02\_Fraction\_5509 FTMS; HCl 64.44 370.6 PRDM5

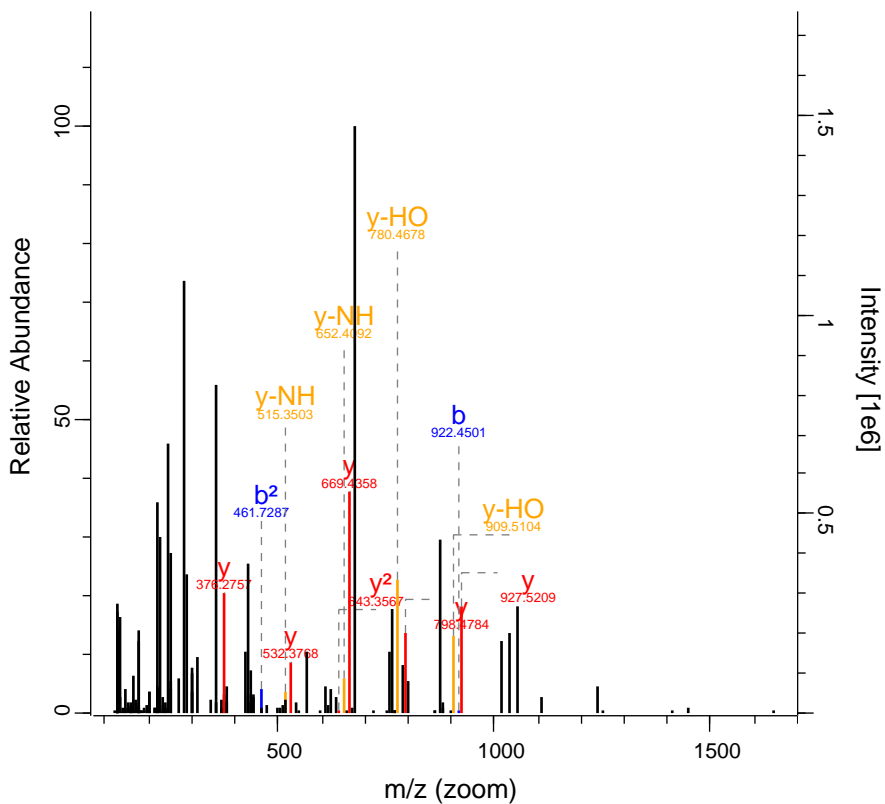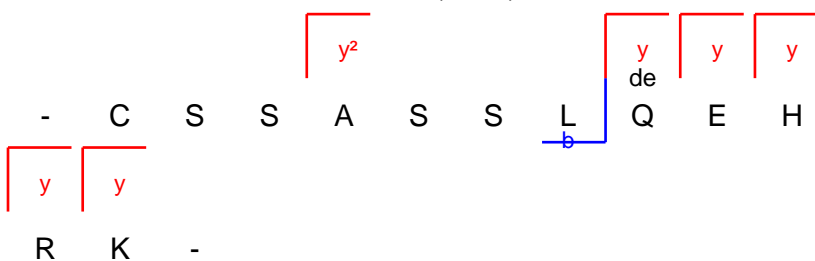

RO-QC-160121\_ZackD\_SS\_Set\_02\_Fraction 5761 FTMS; HC 77.38 788.39 PCSK1N

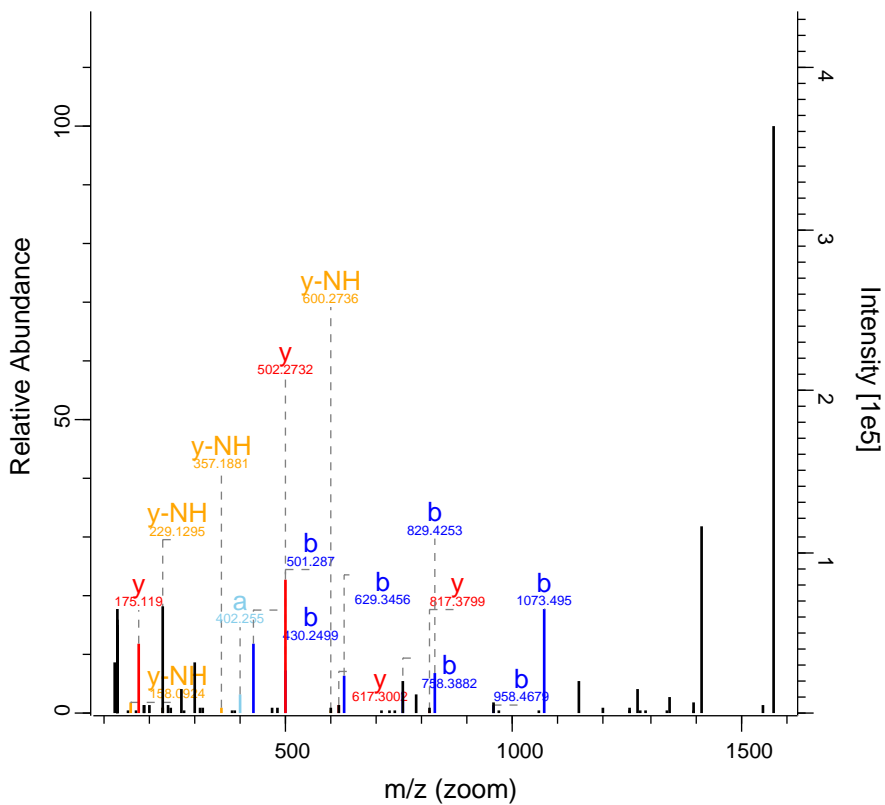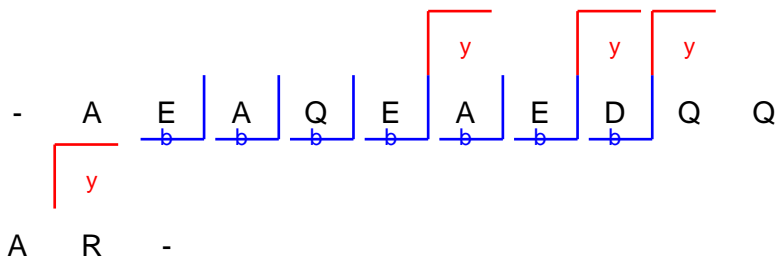

RO-QC-160121\_ZackD\_SS\_Set\_02\_Fraction 5811 FTMS; HC 137.4 525.59 PCSK1N

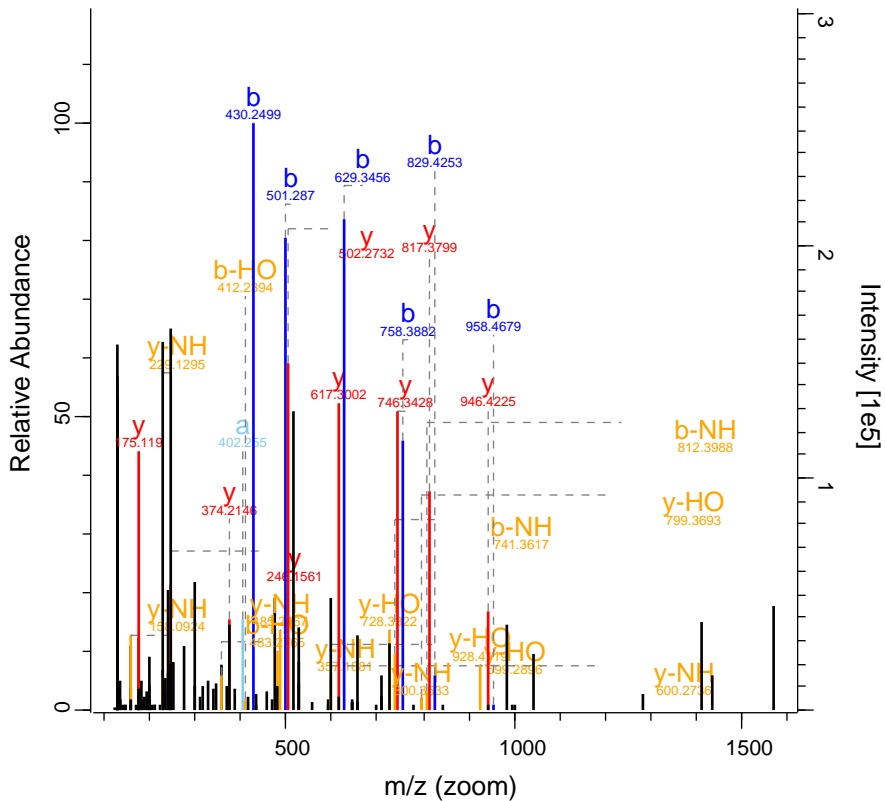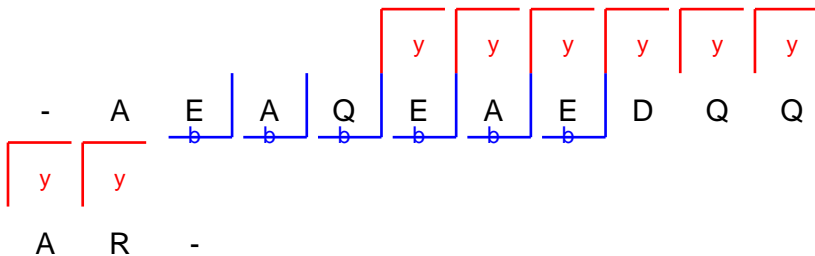

RO-QC-160121\_ZackD\_SS\_Set\_02\_Fraction 5910 FTMS; HC 98.05 771.35 ABCA7

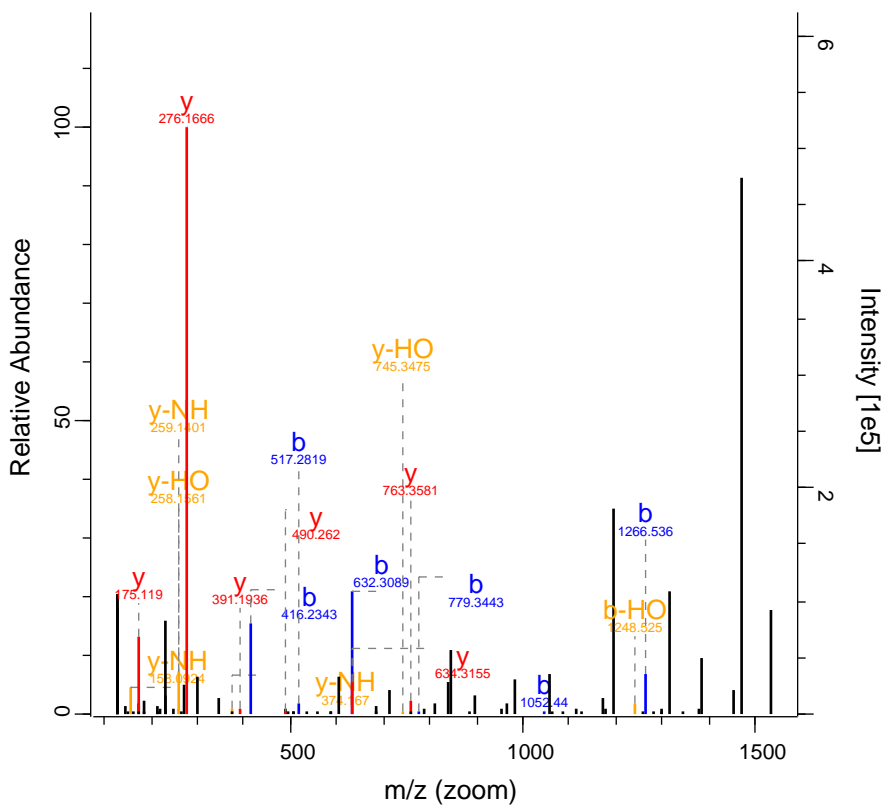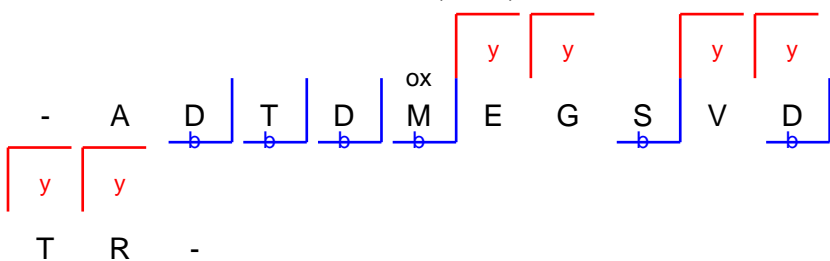

T R -

Raw File

Scan Method Score m/z

RO-QC-160121\_ZackD\_SS\_Set\_02\_Fraction\_12

6060 FTMS; HCD 44.3 475.51

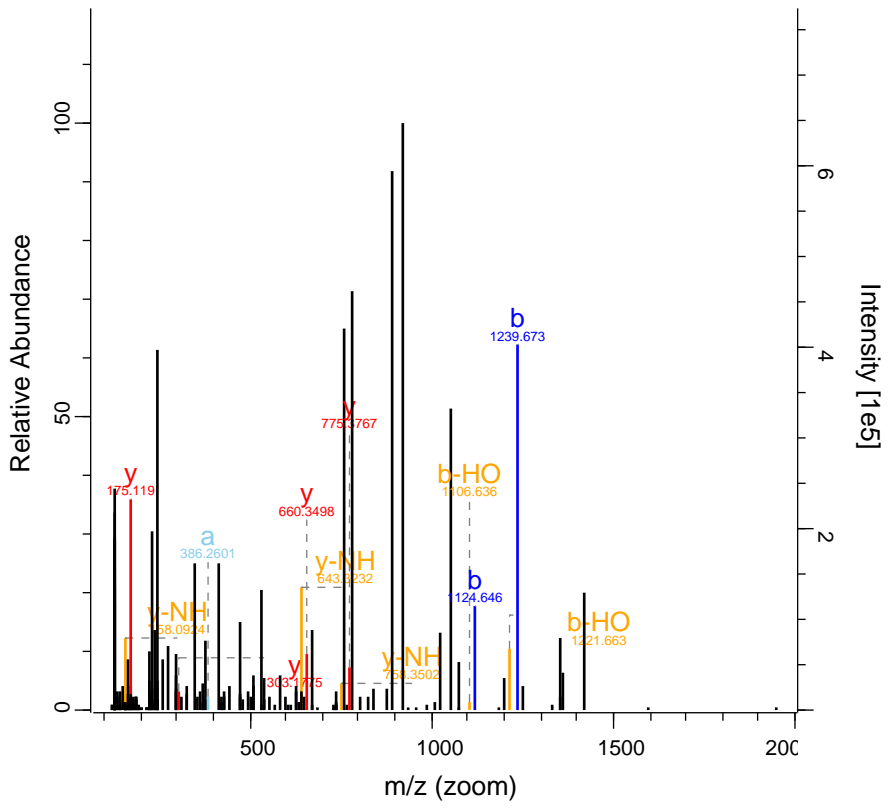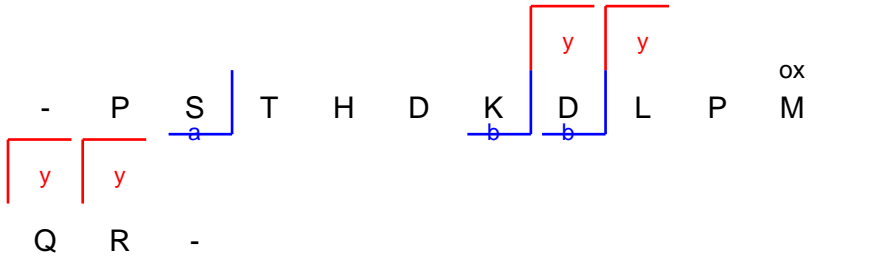

Q R -

RO-QC-160121\_ZackD\_SS\_Set\_02\_Fraction 6239 FTMS; HC 109.11 724.85 FAM189B

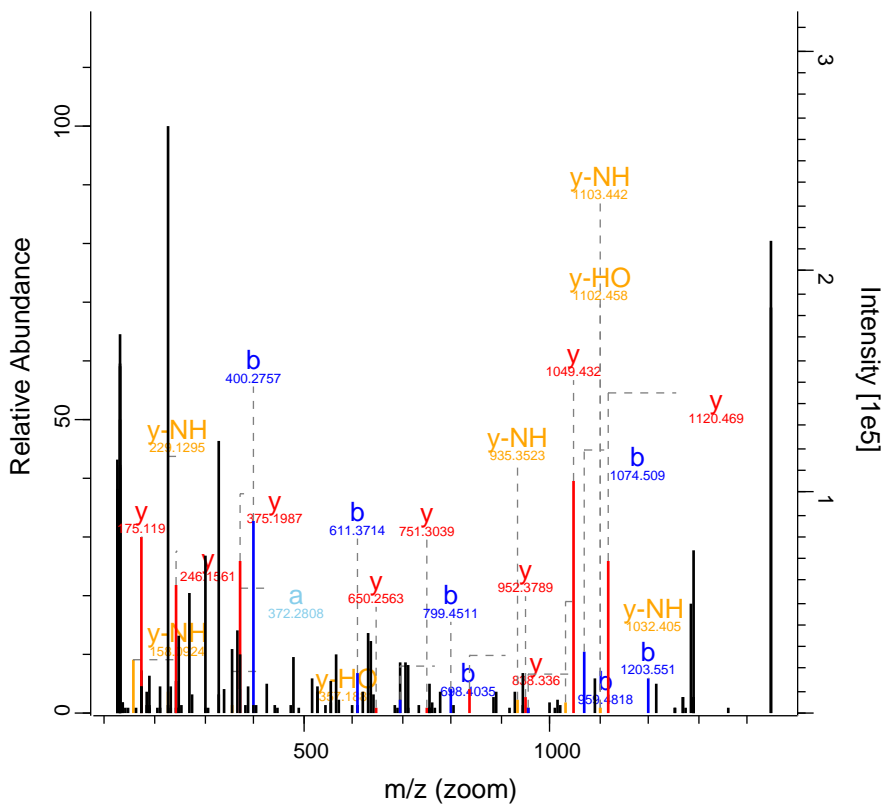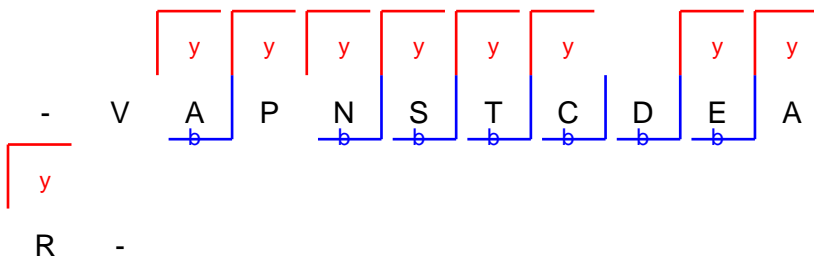

RO-QC-160121\_ZackD\_SS\_Set\_02\_Fraction 6499 FTMS; HC 97.57 658.87 MAGI3

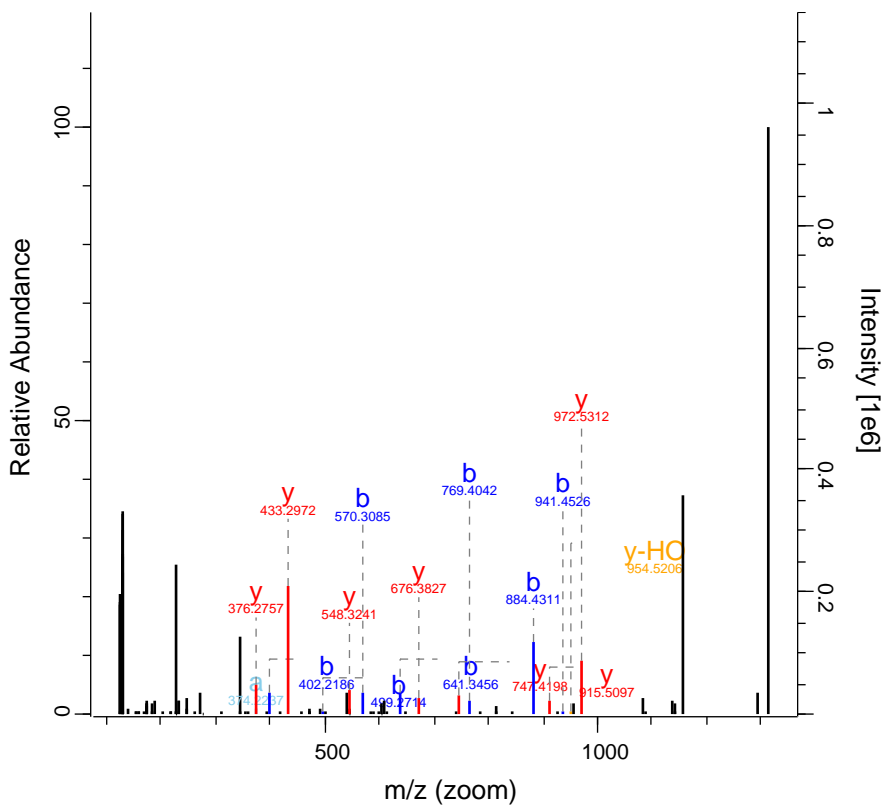

m/z (zoom)

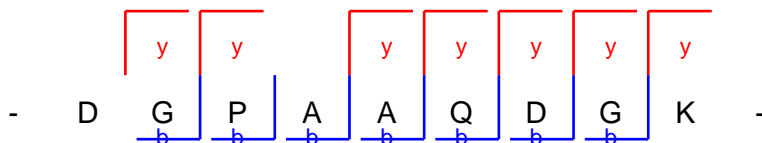



RO-QC-160121\_ZackD\_SS\_Set\_02\_Fraction 6640 FTMS; HC 50.04 564.79 IGSF21

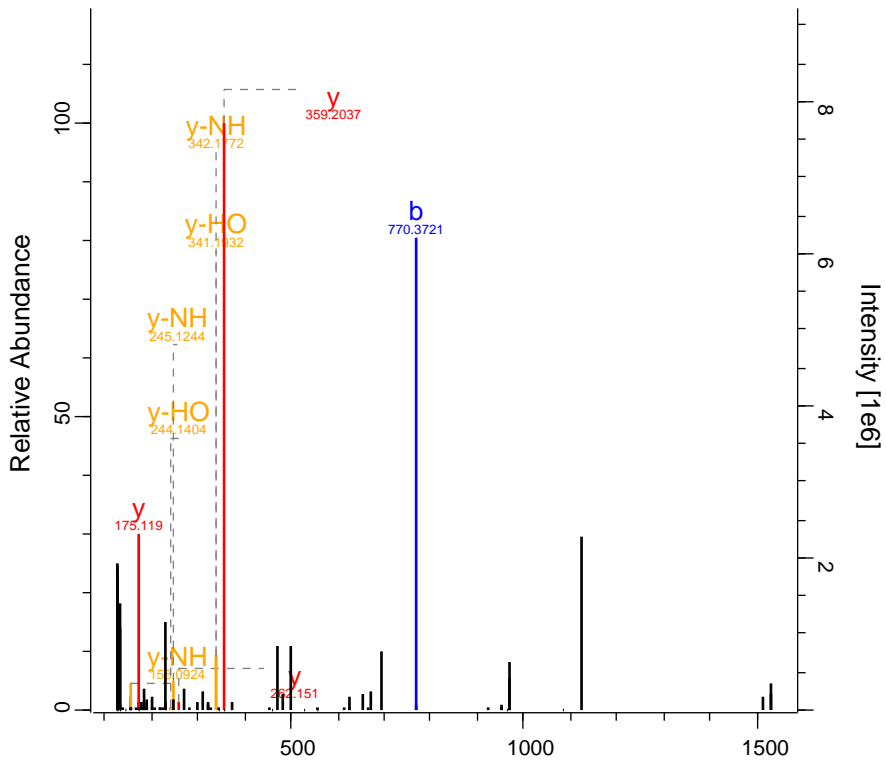

m/z (zoom)

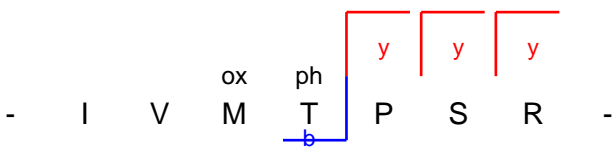

RO-QC-160121\_ZackD\_SS\_Set\_02\_Fraction 6699 FTMS; HC 118.71 679.89 LENG9

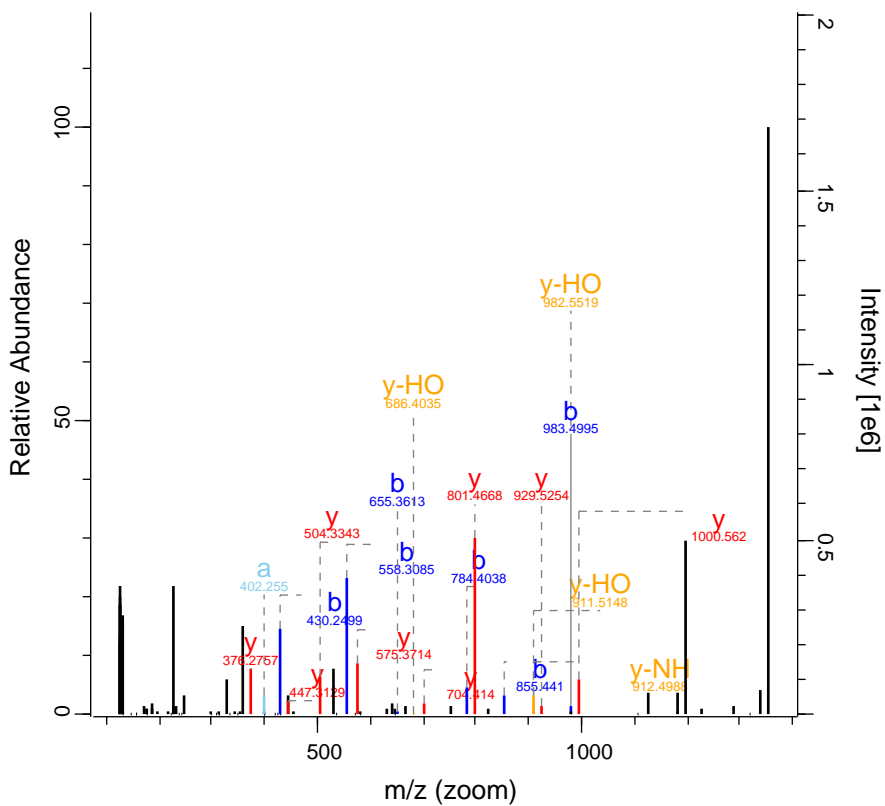

m/z (zoom)

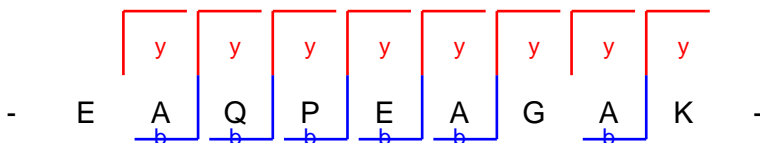

RO-QC-160121\_ZackD\_SS\_Set\_02\_Fraction 6842 FTMS; HC 54.76 556.27 PLEKHF1

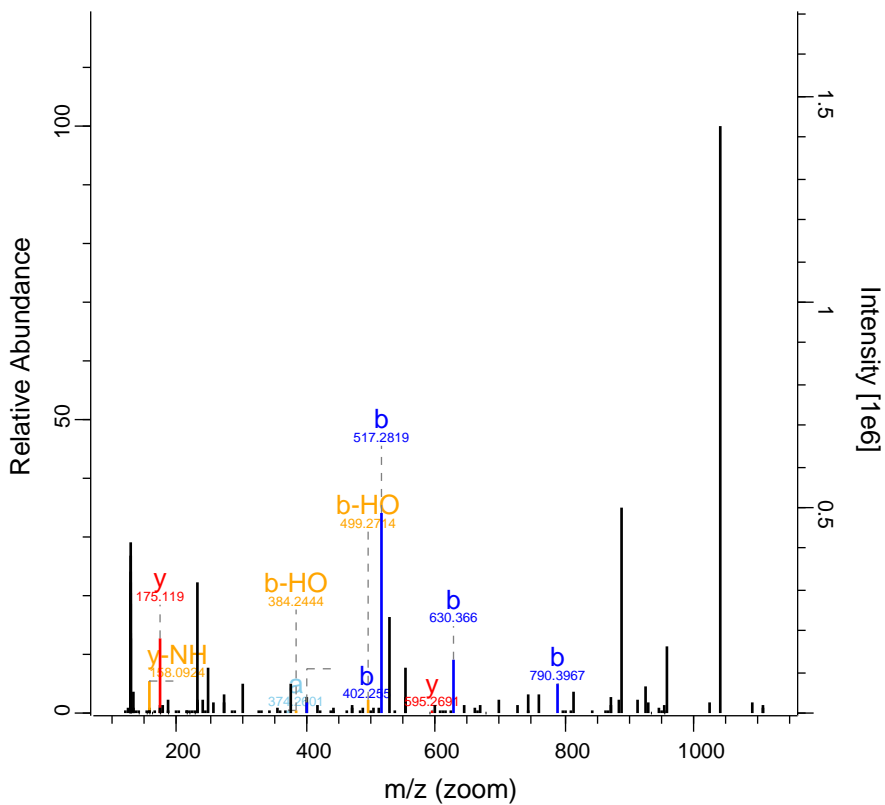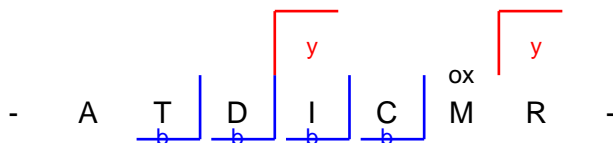

| Raw File                                 | Scan | Method    | Score | m/z    |
|------------------------------------------|------|-----------|-------|--------|
| RO-QC-160121_ZackD_SS_Set_02_Fraction_12 | 6999 | FTMS; HCD | 80.22 | 435.59 |

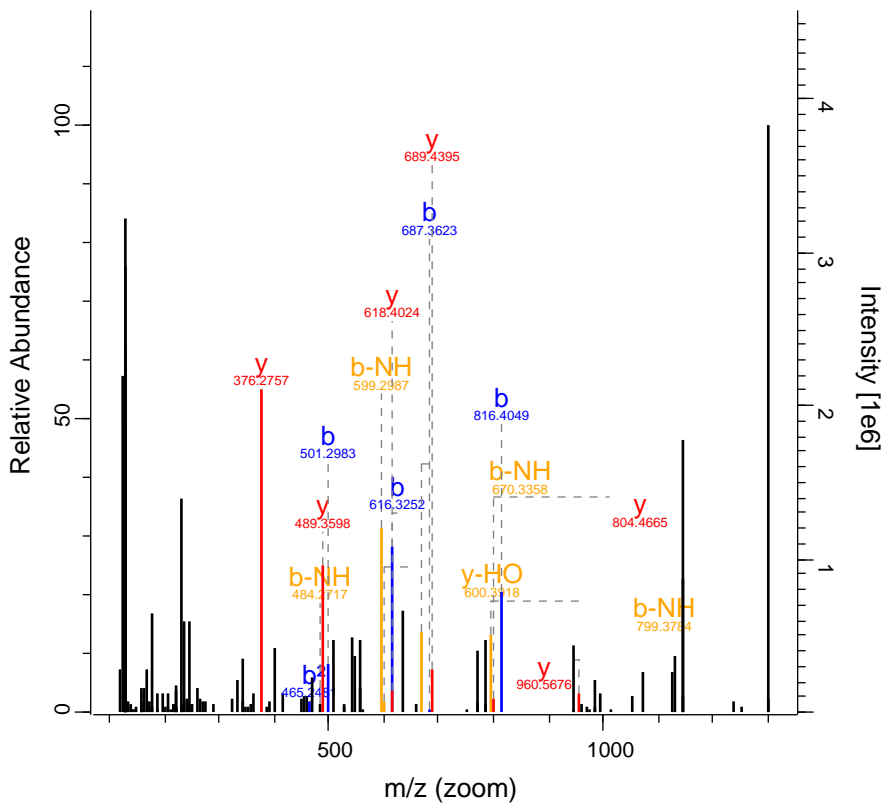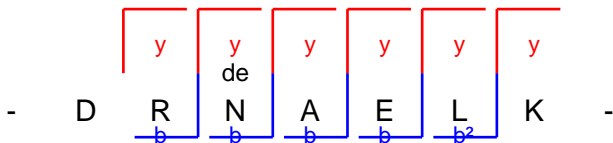

RO-QC-160121\_ZackD\_SS\_Set\_02\_Fraction\_7413 FTMS; HCl 64.73 781.4 GKAP1

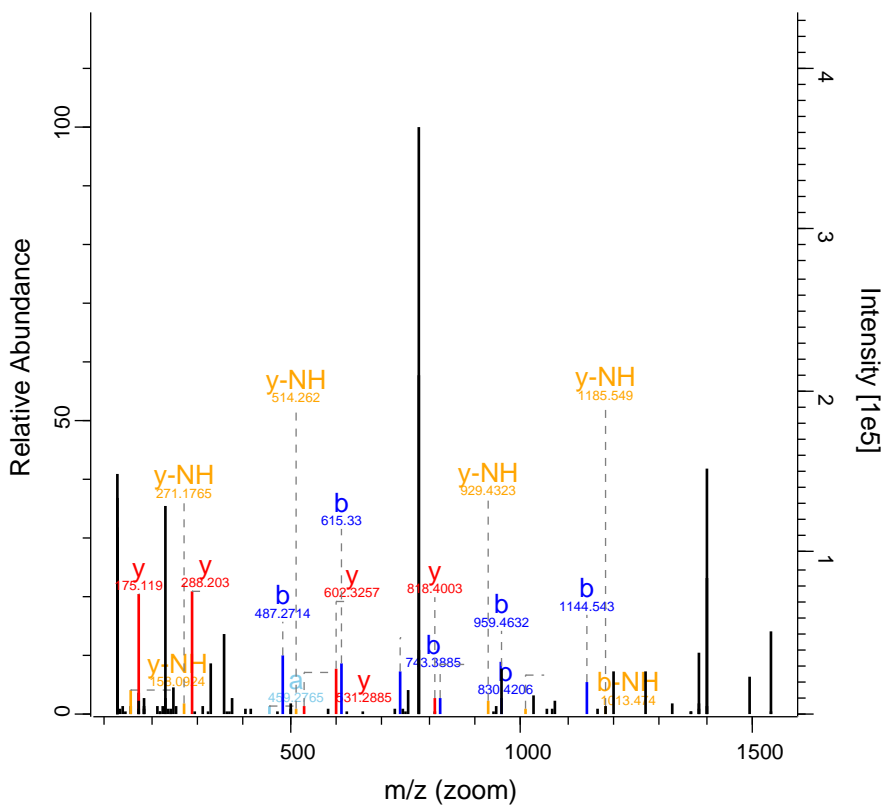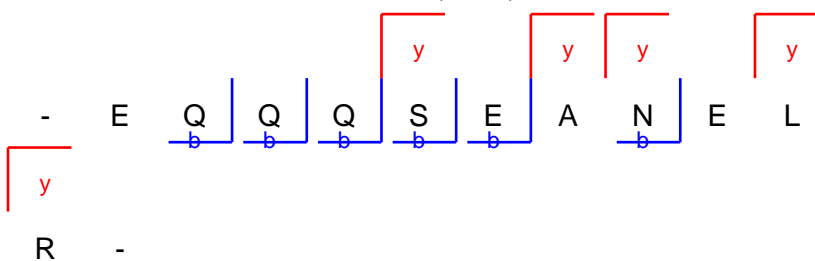

R

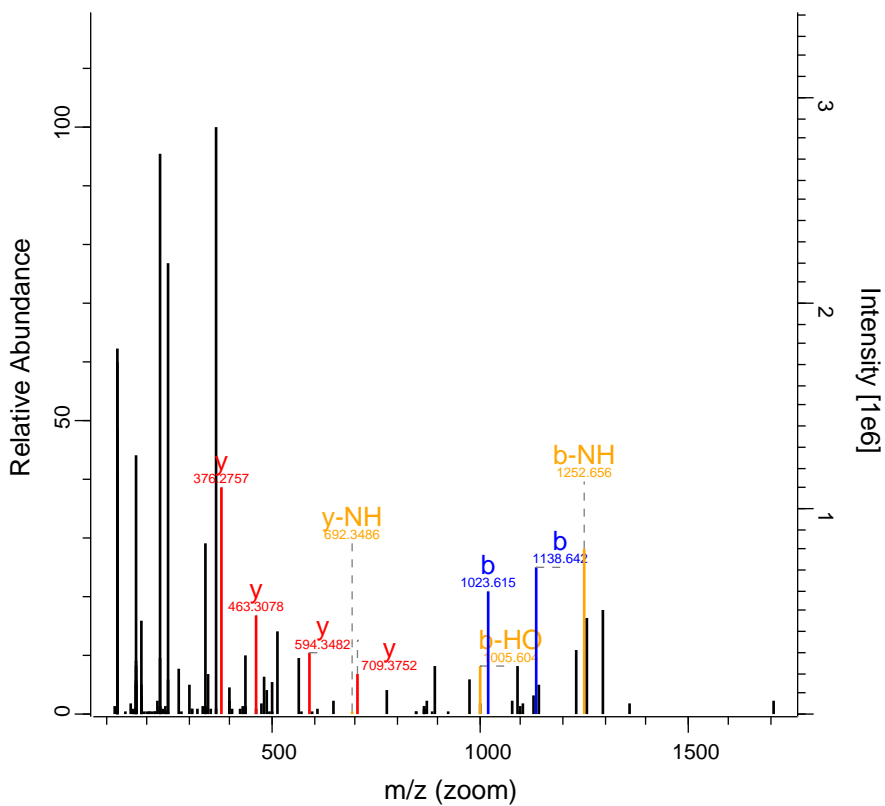

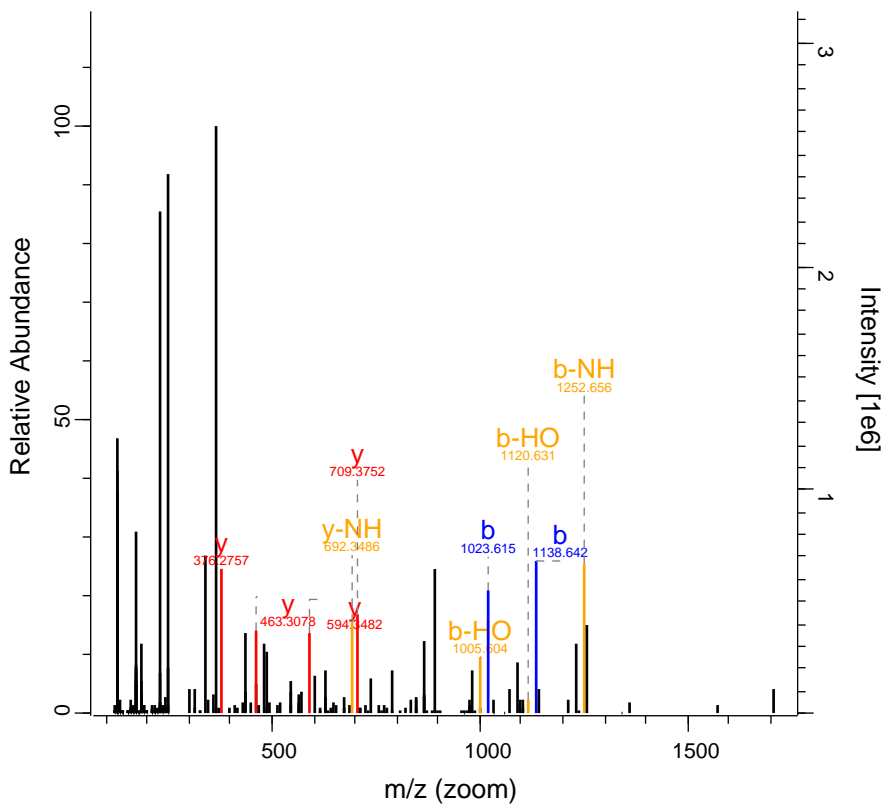

K -

RO-QC-160121\_ZackD\_SS\_Set\_02\_Fraction 8264 FTMS; HC 144.09 631.84 MBTPS2

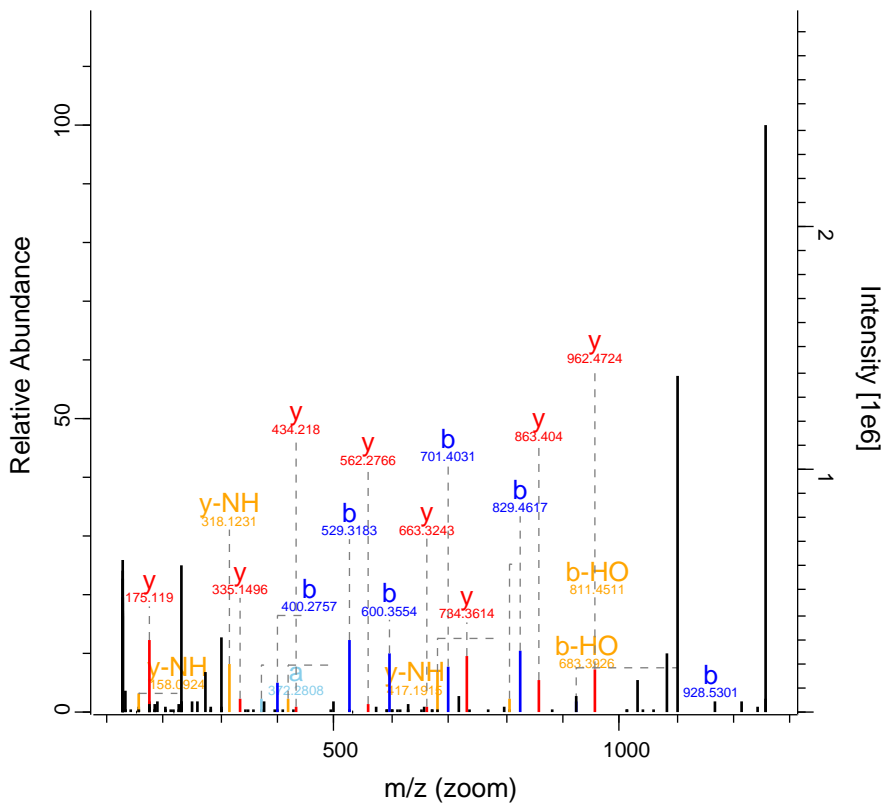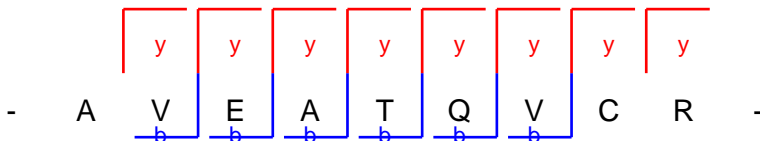



RO-QC-160121\_ZackD\_SS\_Set\_02\_Fraction 8520 FTMS; HC 97.86 661.34 RIN2

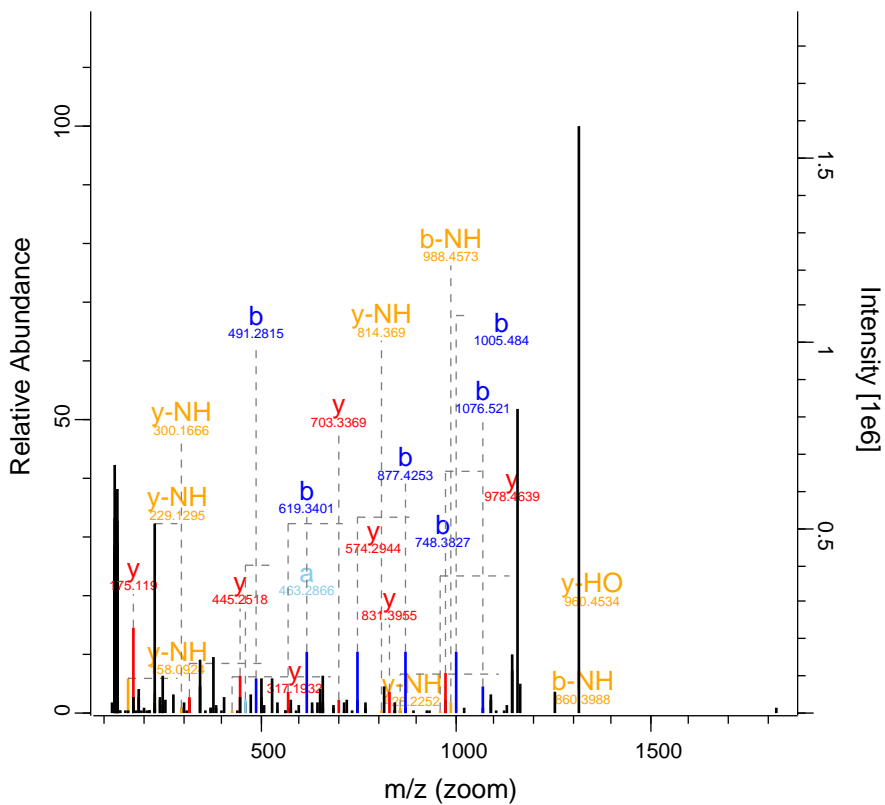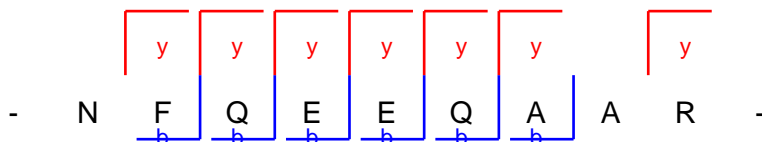



RO-QC-160121\_ZackD\_SS\_Set\_02\_Fraction 9142 FTMS; HC 105.95 350.21 SAMD1

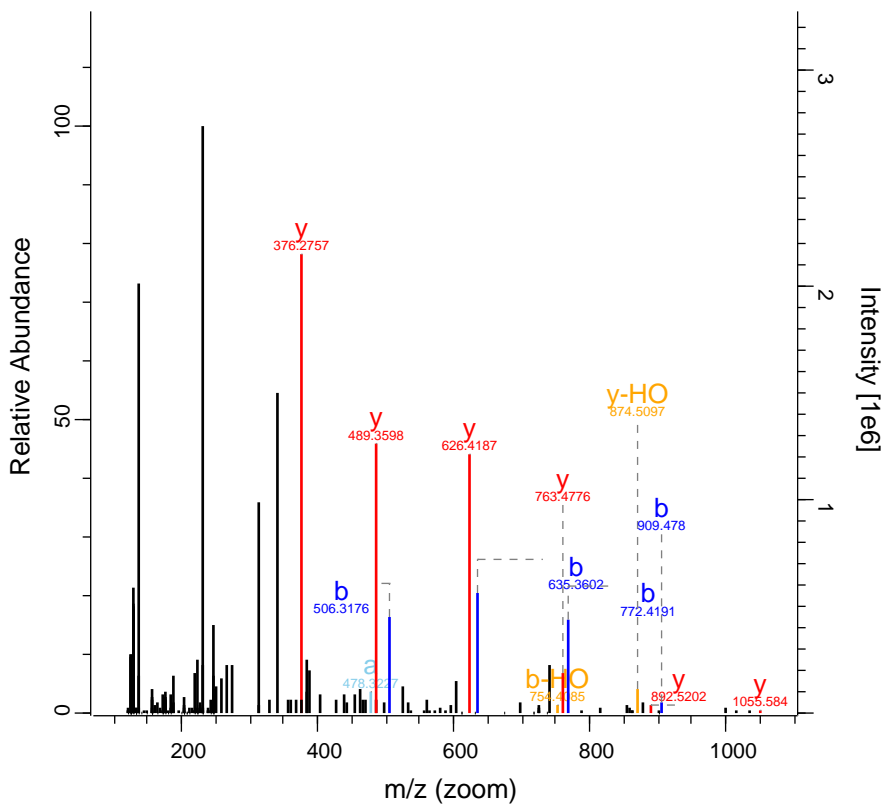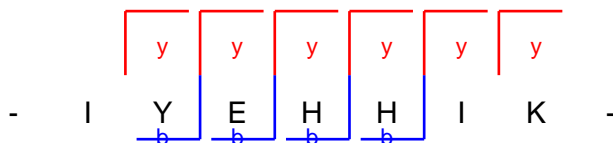

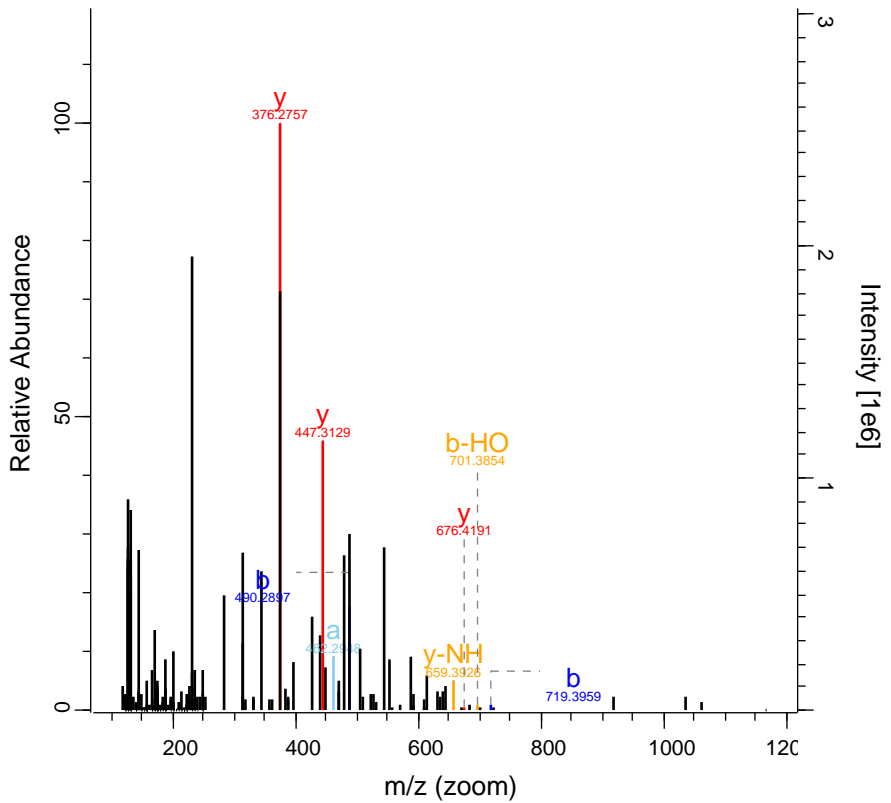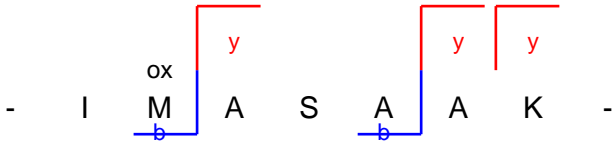

RO-QC-160121\_ZackD\_SS\_Set\_02\_Fraction 9845 FTMS; HC 109.11 566.81 CCDC167

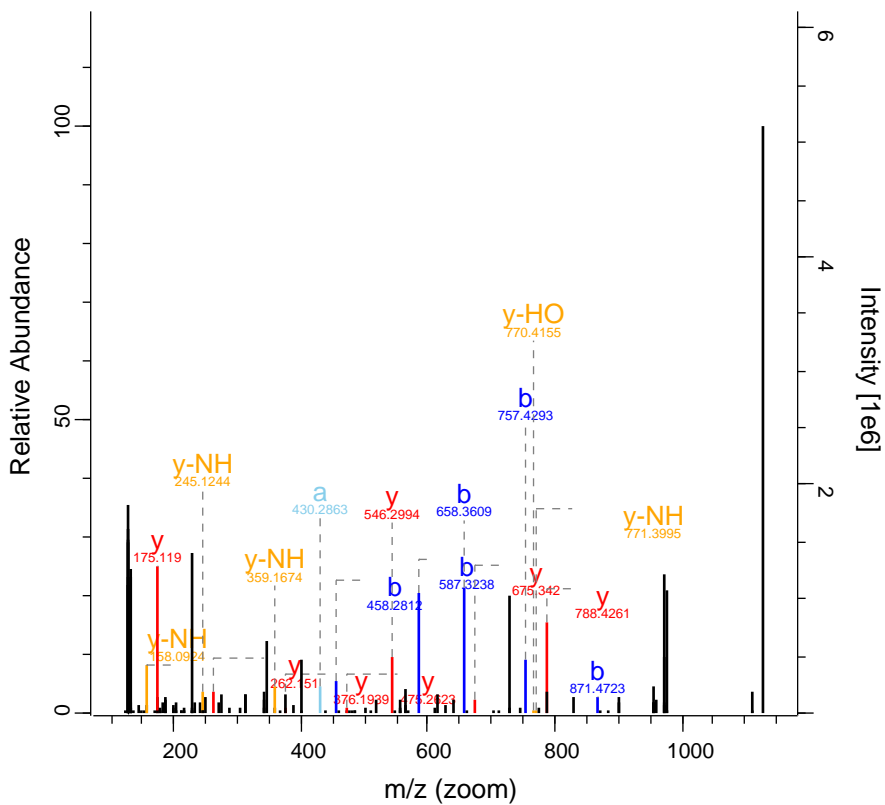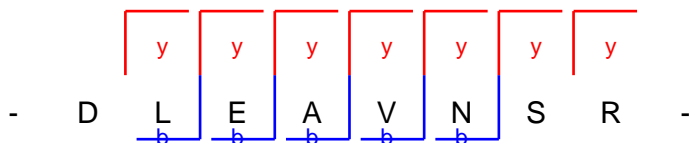

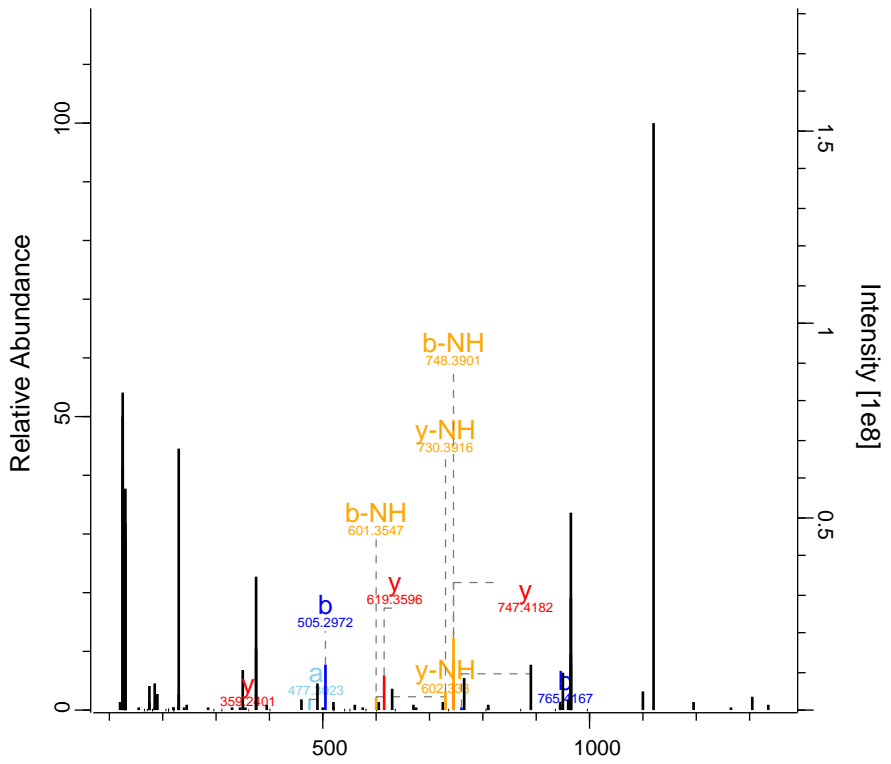

m/z (zoom)

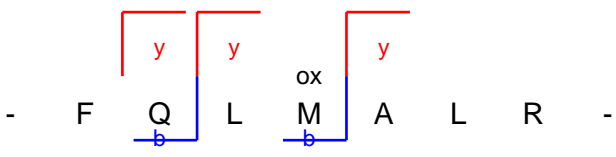

RO-QC-160121\_ZackD\_SS\_Set\_02\_Fraction 10743 FTMS; HC 132.96 733.9 PIGB

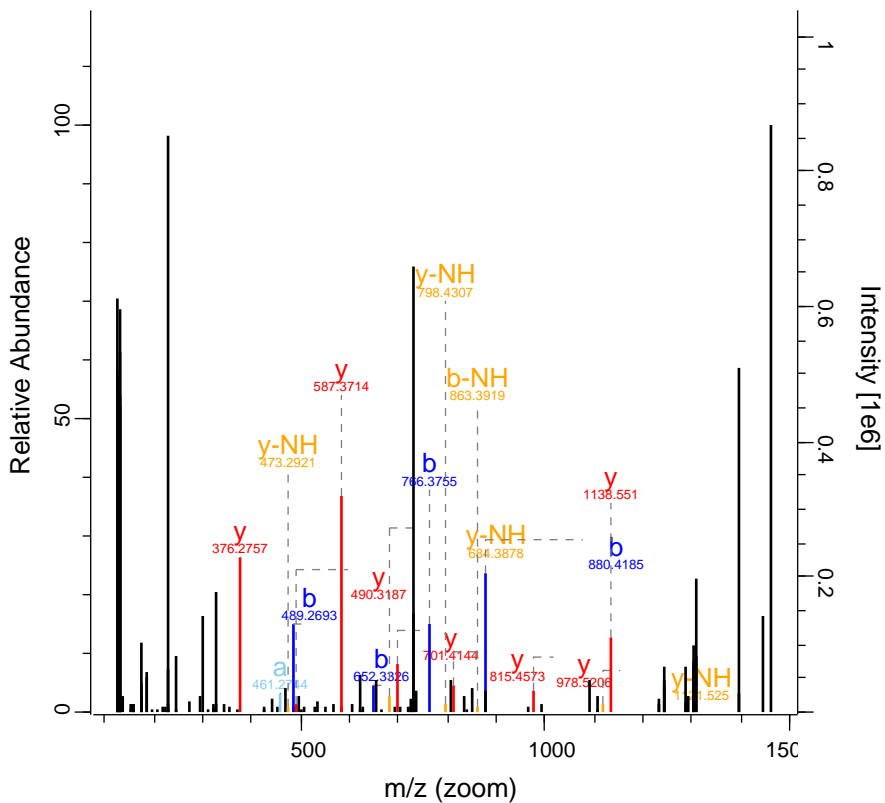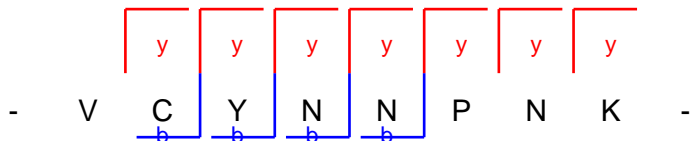

RO-QC-160121\_ZackD\_SS\_Set\_02\_Fraction 11618 FTMS; HC 112.17 637.42 NOVA2

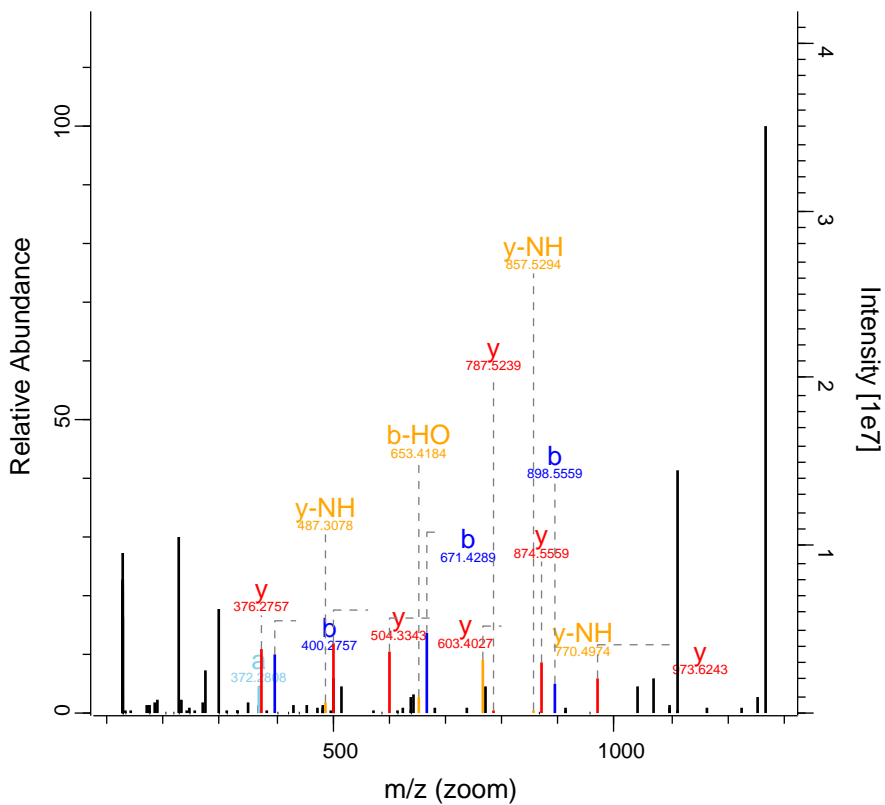



RO-QC-160121\_ZackD\_SS\_Set\_02\_Fraction 11687 FTMS; HC 58.92 425.28 NOVA2

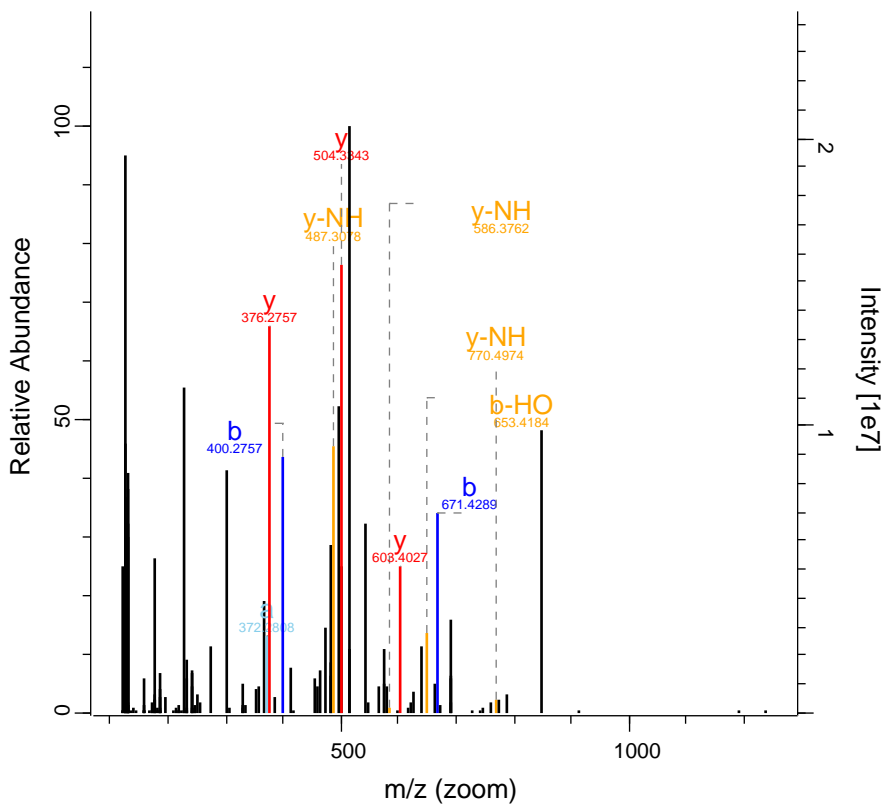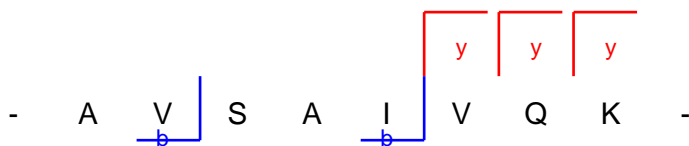

RO-QC-160121\_ZackD\_SS\_Set\_02\_Fraction 12851 FTMS; HC 107.06 843.9 PLLP

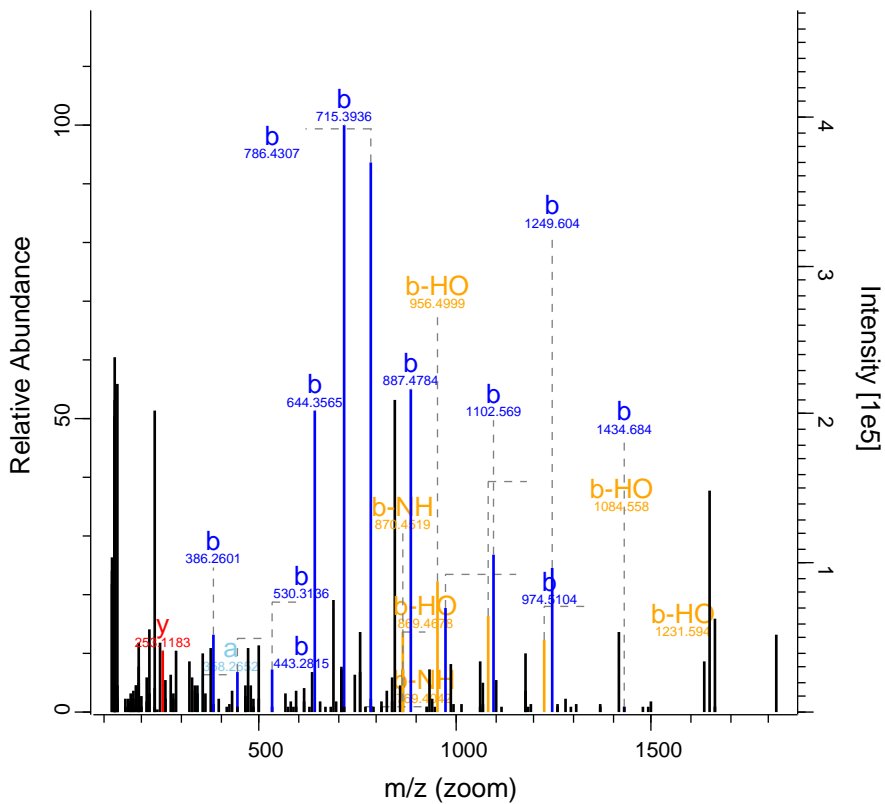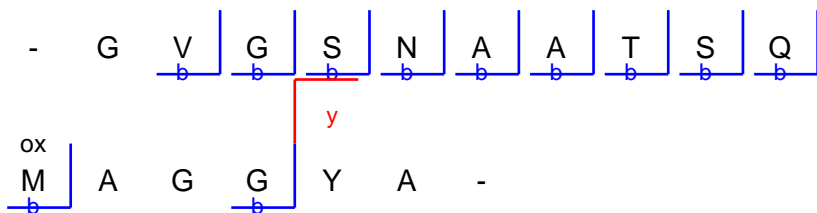

RO-QC-160121\_ZackD\_SS\_Set\_02\_Fraction1 12917 FTMS; HC 48.42 403.74 CCDC146

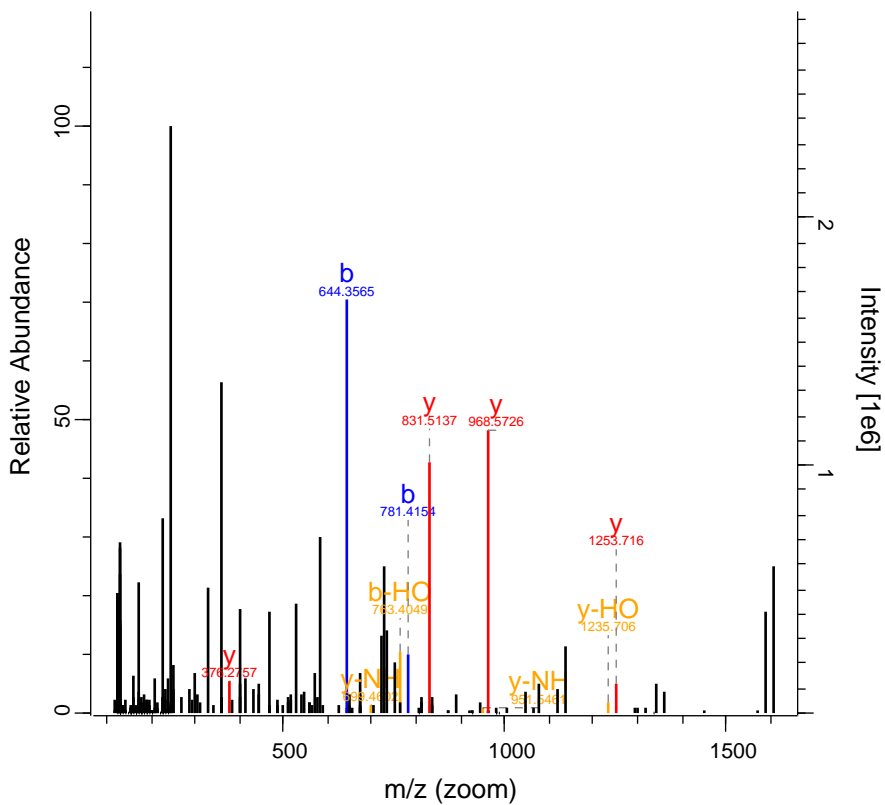

m/z (zoom)

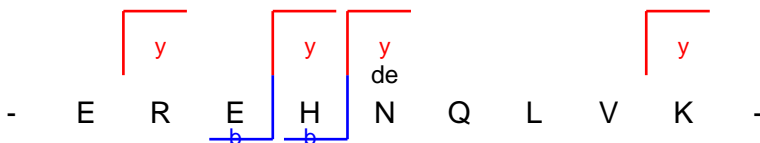

RO-QC-160121\_ZackD\_SS\_Set\_02\_Fraction1 13106 FTMS; HC 87.48 479.29 COX8A

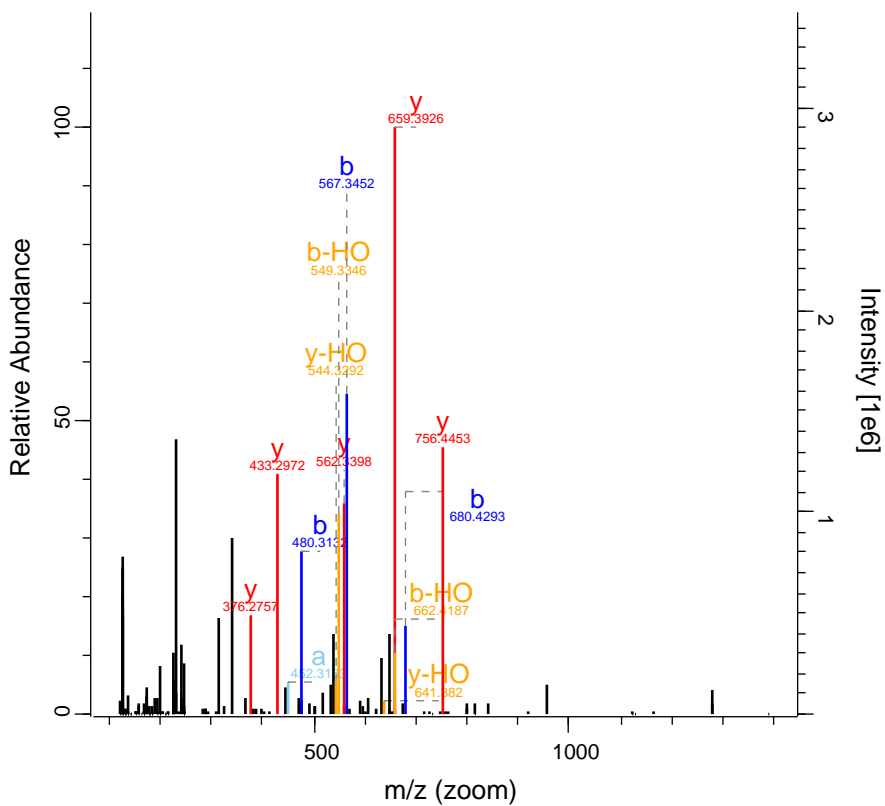

m/z (zoom)

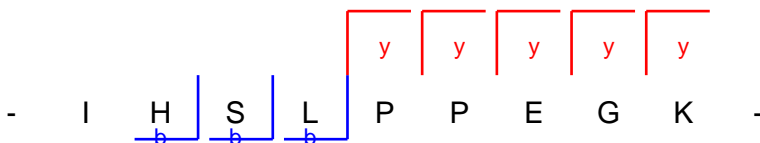

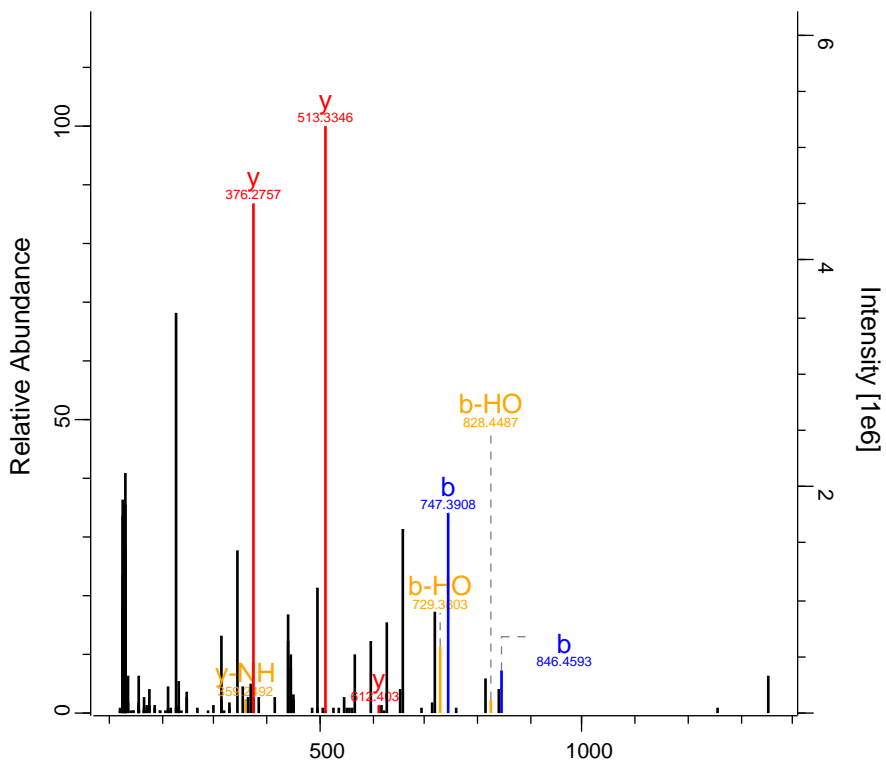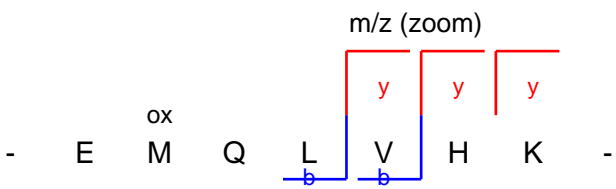

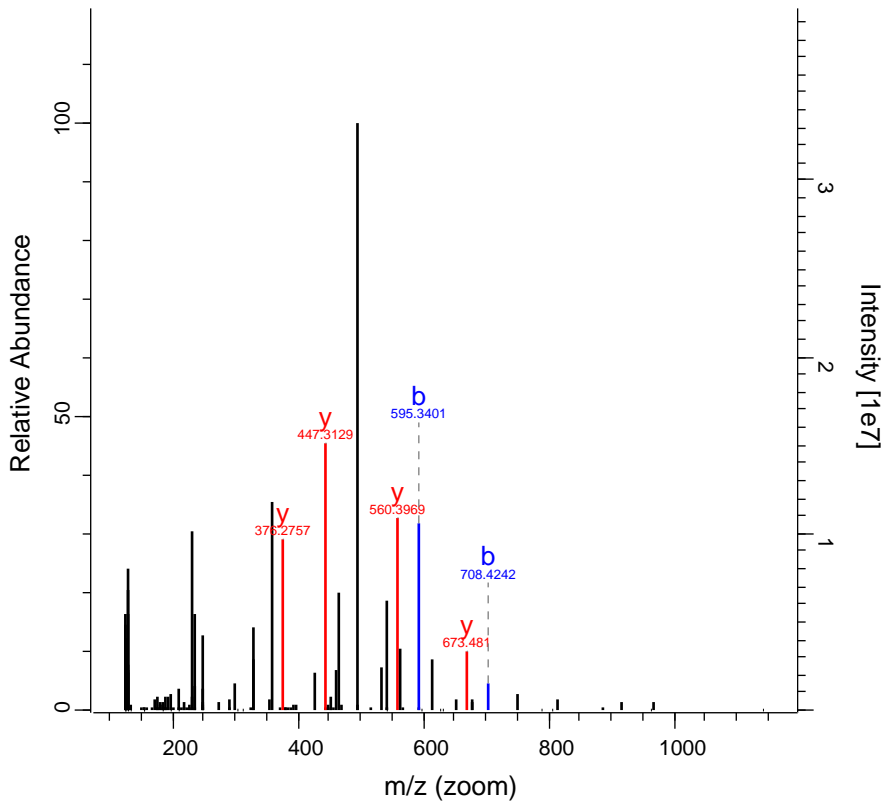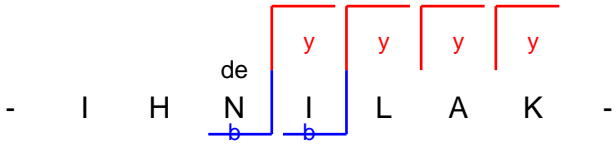

Raw File

Scan Method Score m/z

RO-QC-160121\_ZackD\_SS\_Set\_02\_Fraction\_12

14236 FTMS; HCD 57.1 423.28

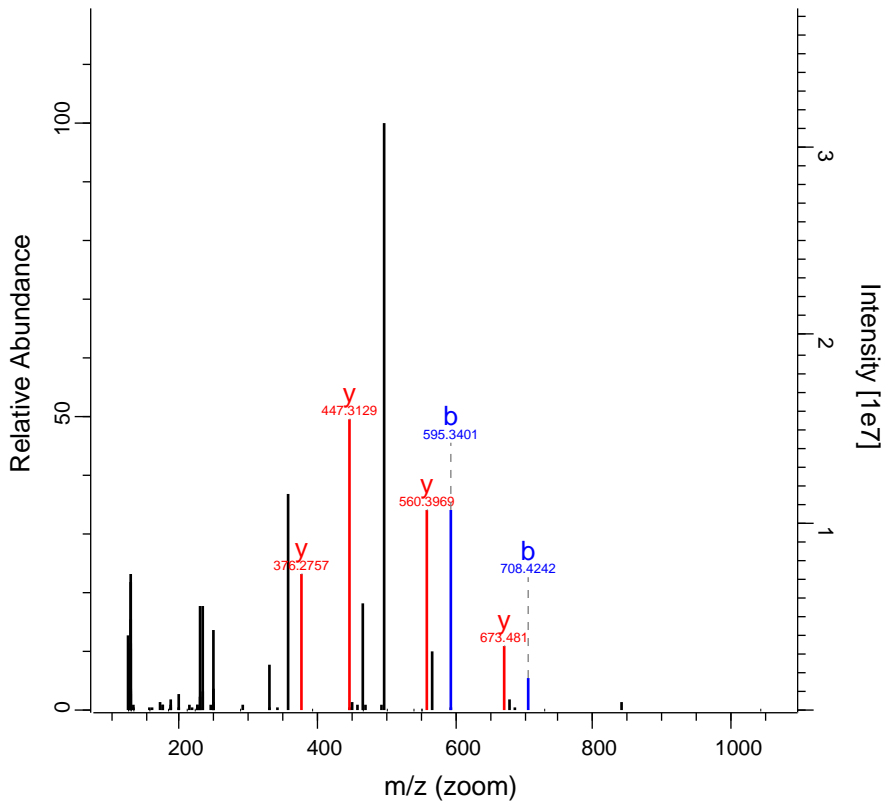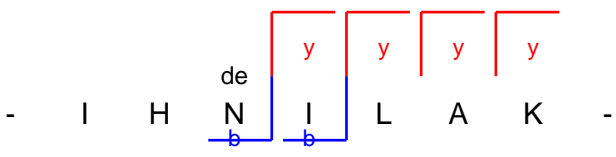

RO-QC-160121\_ZackD\_SS\_Set\_02\_Fraction 15193 FTMS; HC 41.26 697.6 CCSMST1

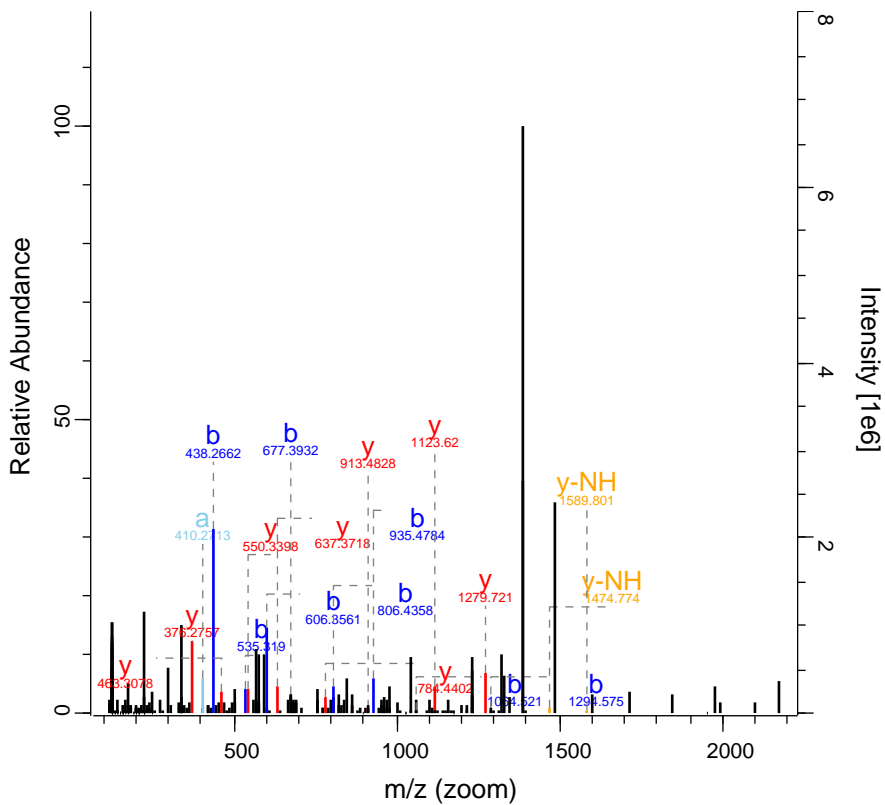

- A H P A A E E E D D  
 - b - b - b - b - b - b - b - b  
 y y y y y y y y  
 P D R P I E F S S S K



RO-QC-160121\_ZackD\_SS\_Set\_02\_Fraction15408 FTMS; HC 171.92 819.98 PLK2

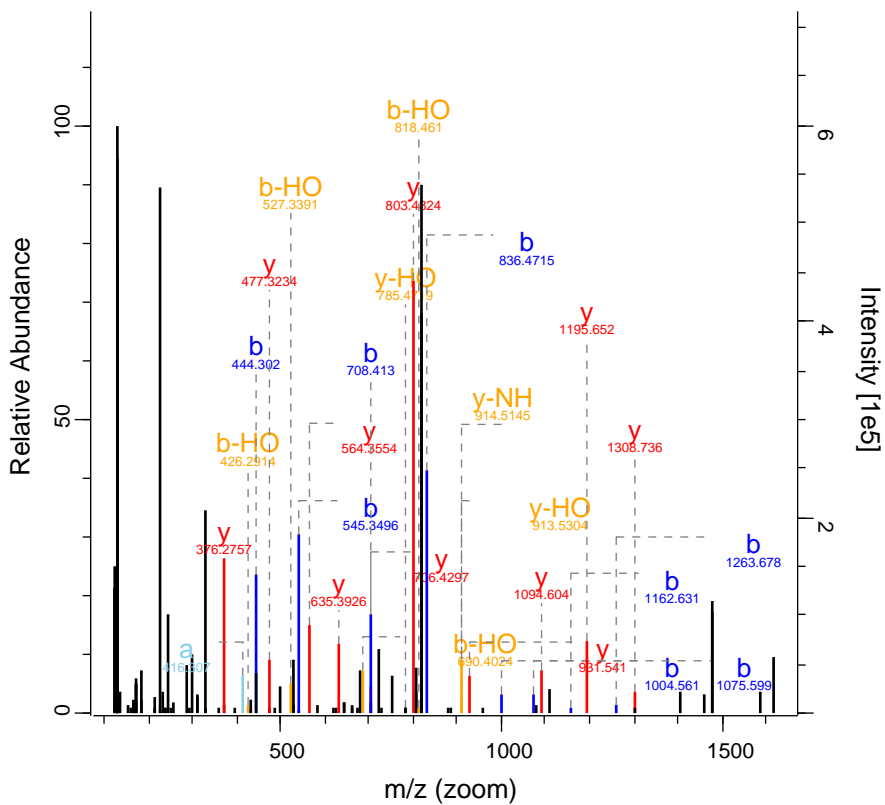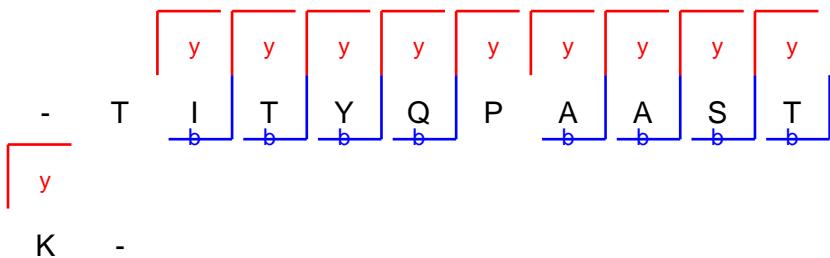

RO-QC-160121\_ZackD\_SS\_Set\_02\_Fraction15519 FTMS; HC 120.15 797.42 CLDN1

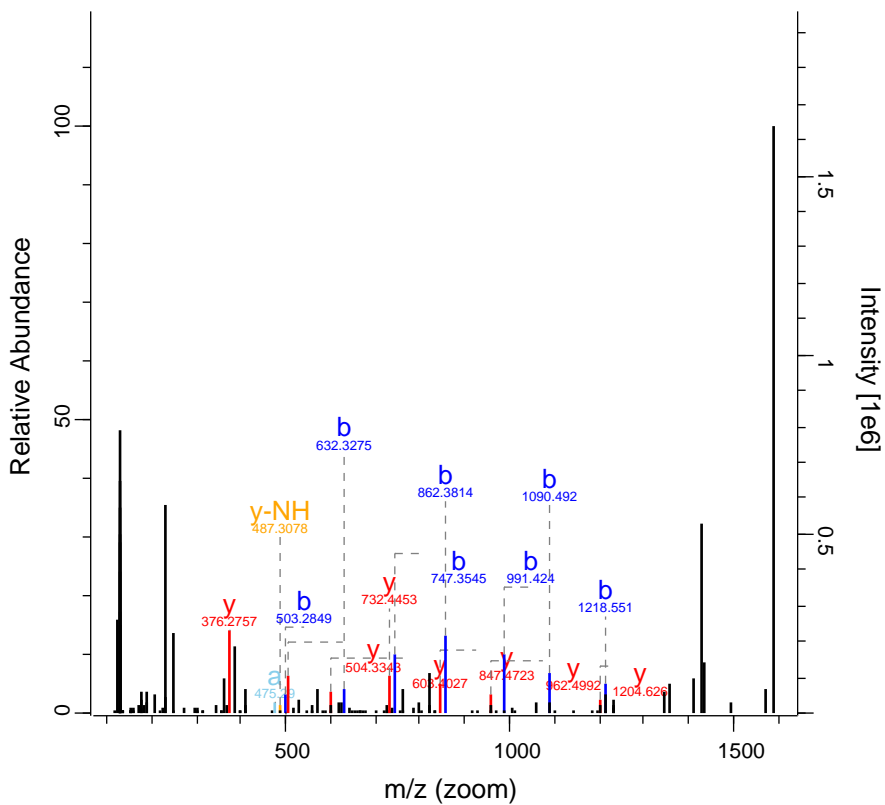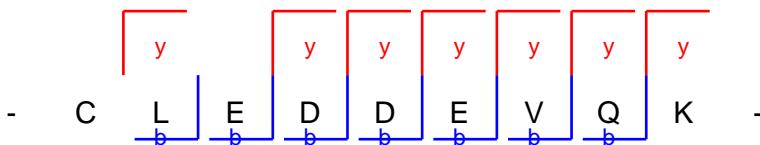

RO-QC-160121\_ZackD\_SS\_Set\_02\_Fraction 16219 FTMS; HC 84.17 749.44 LRRC32

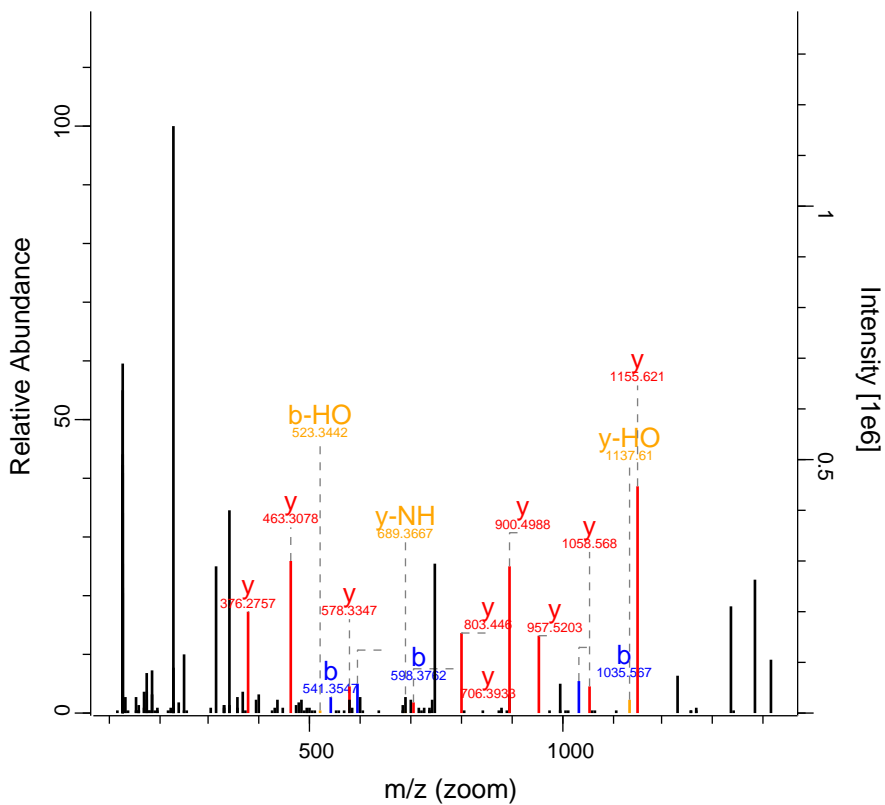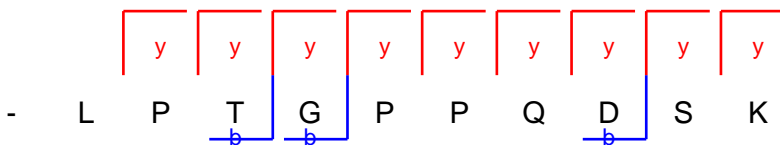

RO-QC-160121\_ZackD\_SS\_Set\_02\_Fraction16873 FTMS; HC 107.66 781.49 LRR1Q1

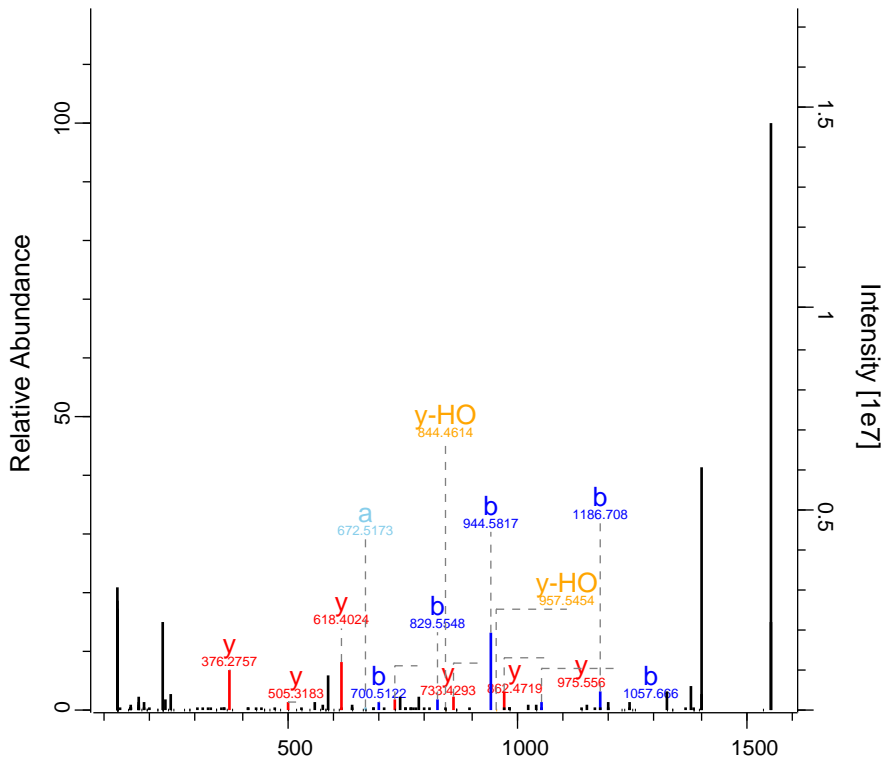

m/z (zoom)

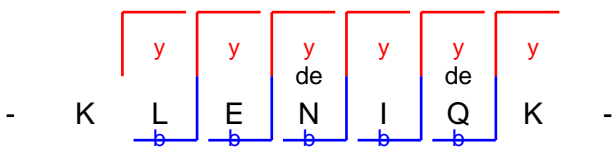



RO-QC-160121\_ZackD\_SS\_Set\_02\_Fraction 17917 FTMS; HC 92.44 732.91 POMP

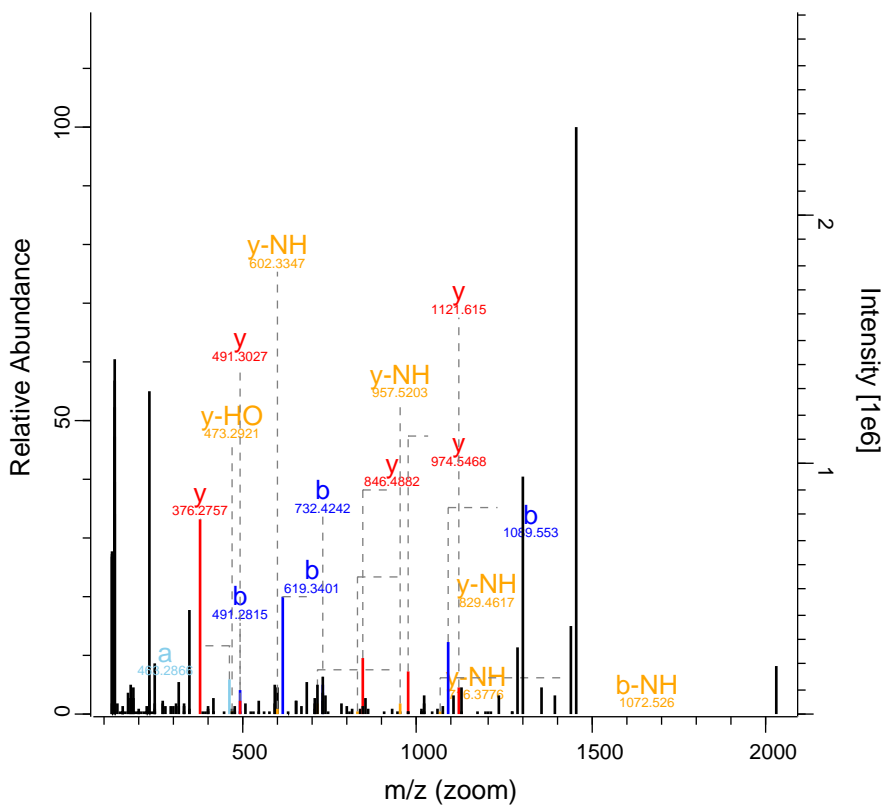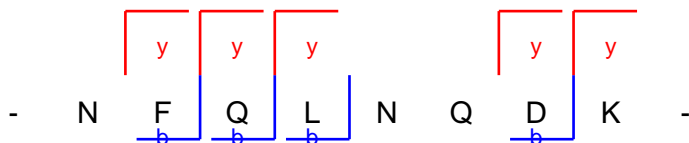

RO-QC-160121\_ZackD\_SS\_Set\_02\_Fraction17972 FTMS; HC 176.91 897.46 SMIM1

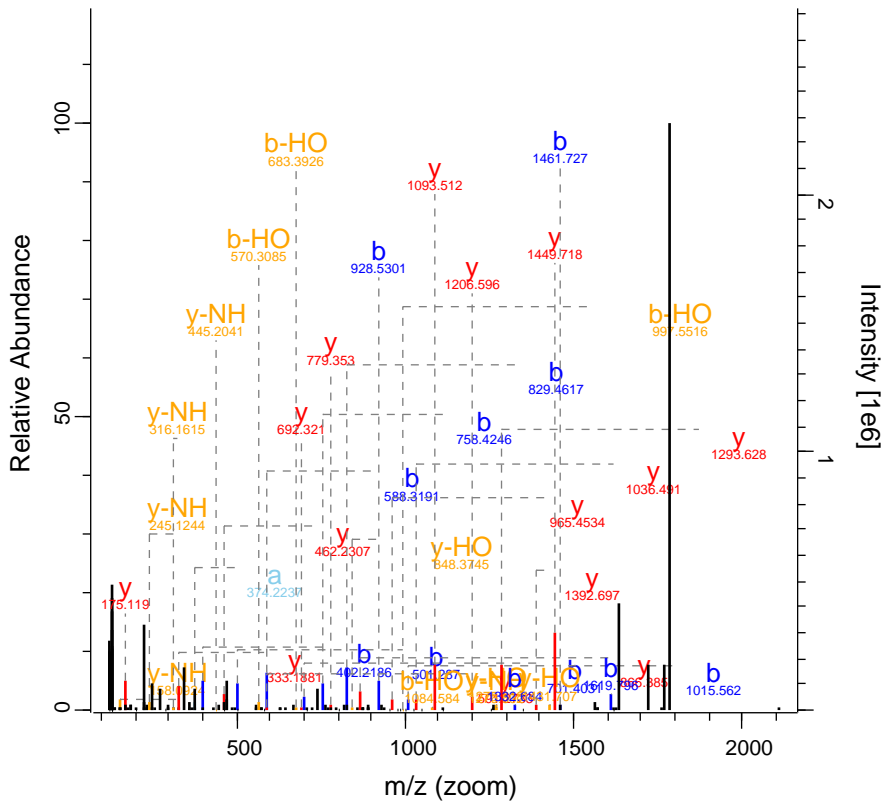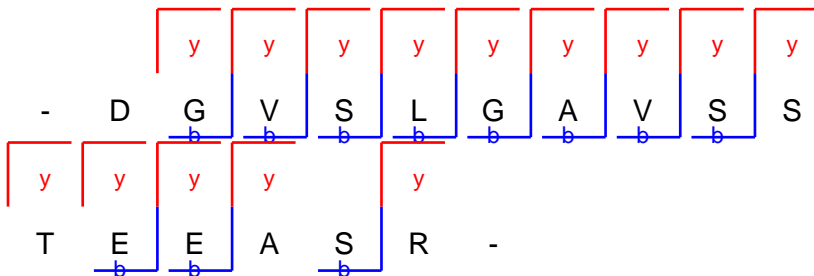

RO-QC-160121\_ZackD\_SS\_Set\_02\_Fraction 18375 FTMS; HC 44.14 725.37 TLL6

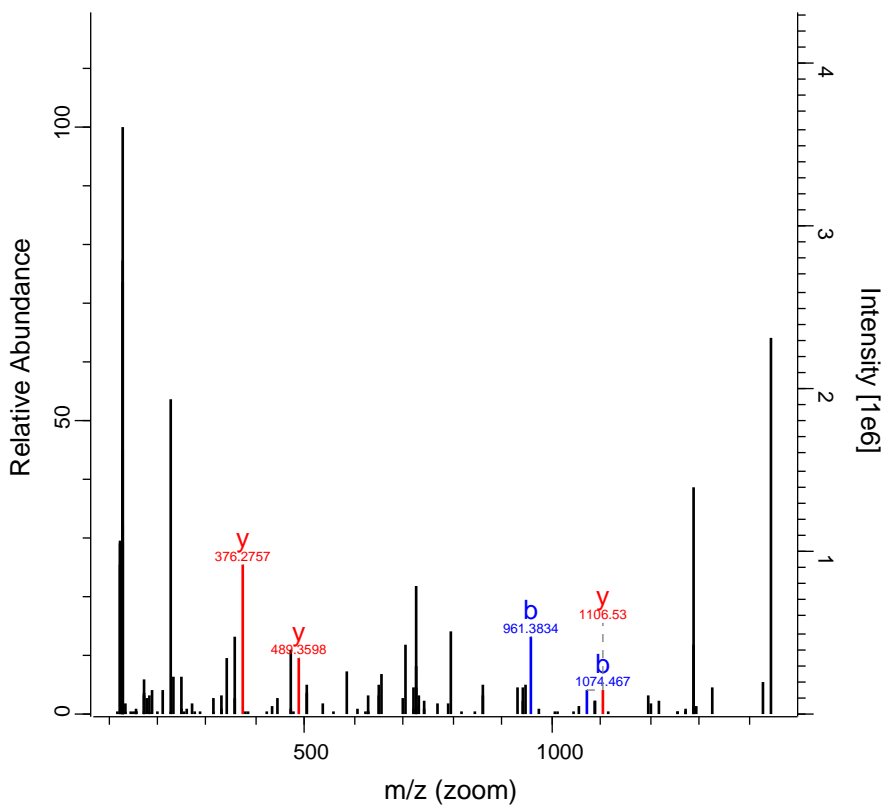

m/z (zoom)

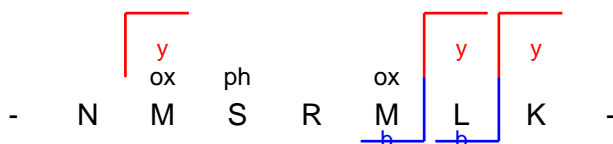



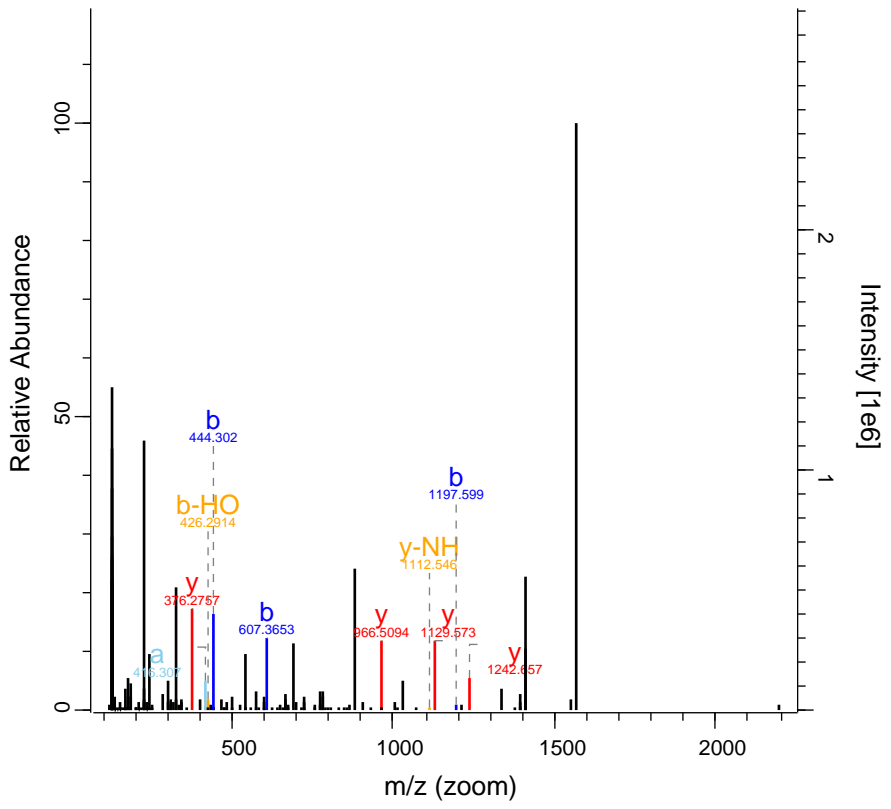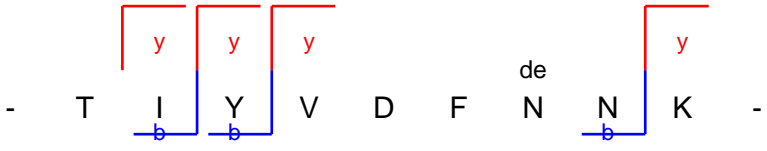

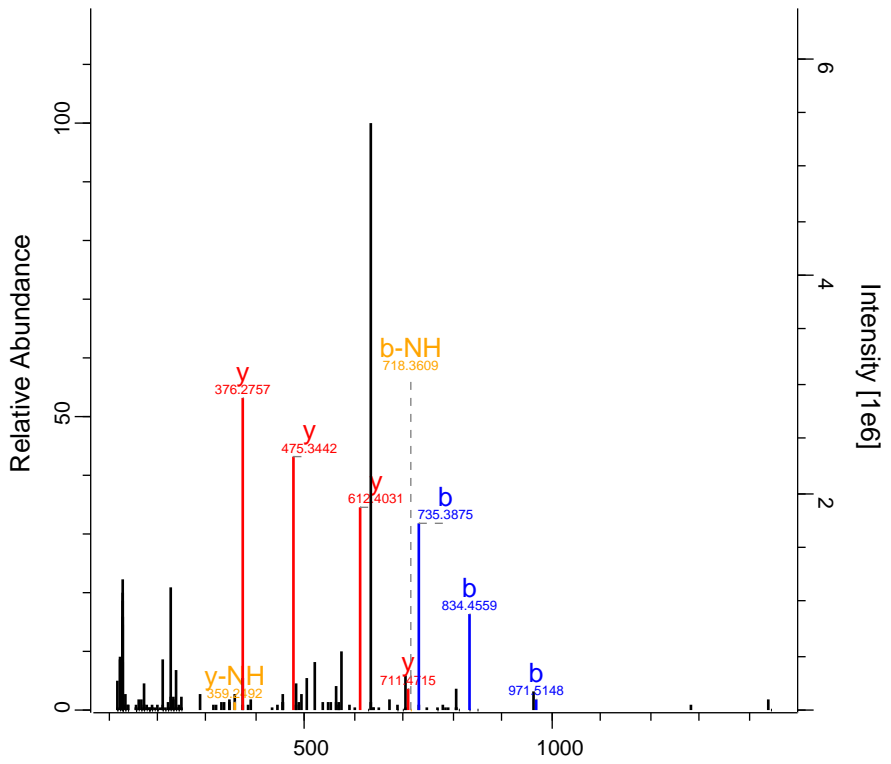

m/z (zoom)

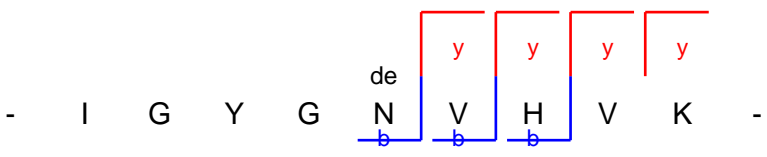

RO-QC-160121\_ZackD\_SS\_Set\_02\_Fraction19552 FTMS; HC 106.42 783.43 KIAA0226

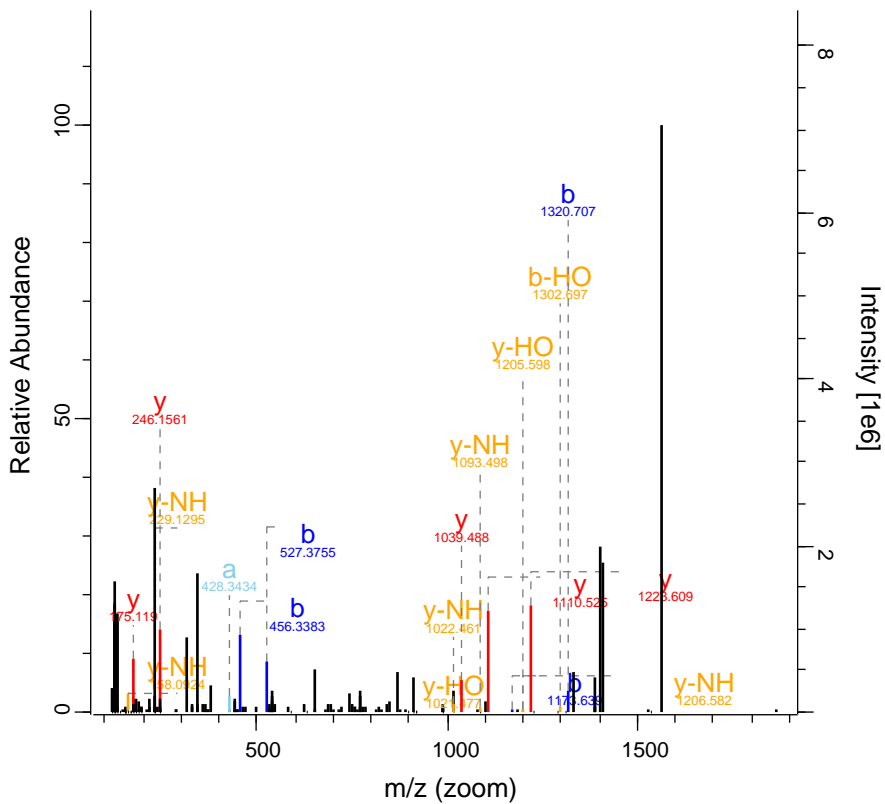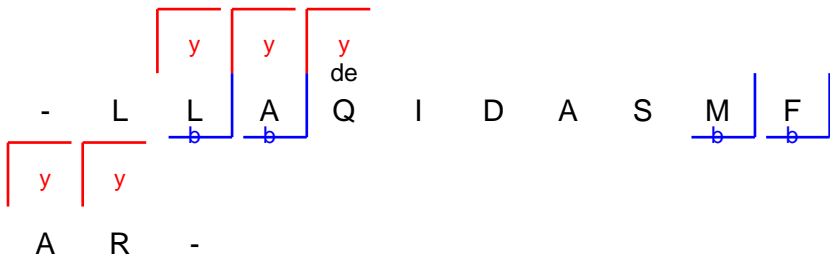



RO-QC-160121\_ZackD\_SS\_Set\_02\_Fraction 20247 FTMS; HC 64.09 964.47 C3orf49

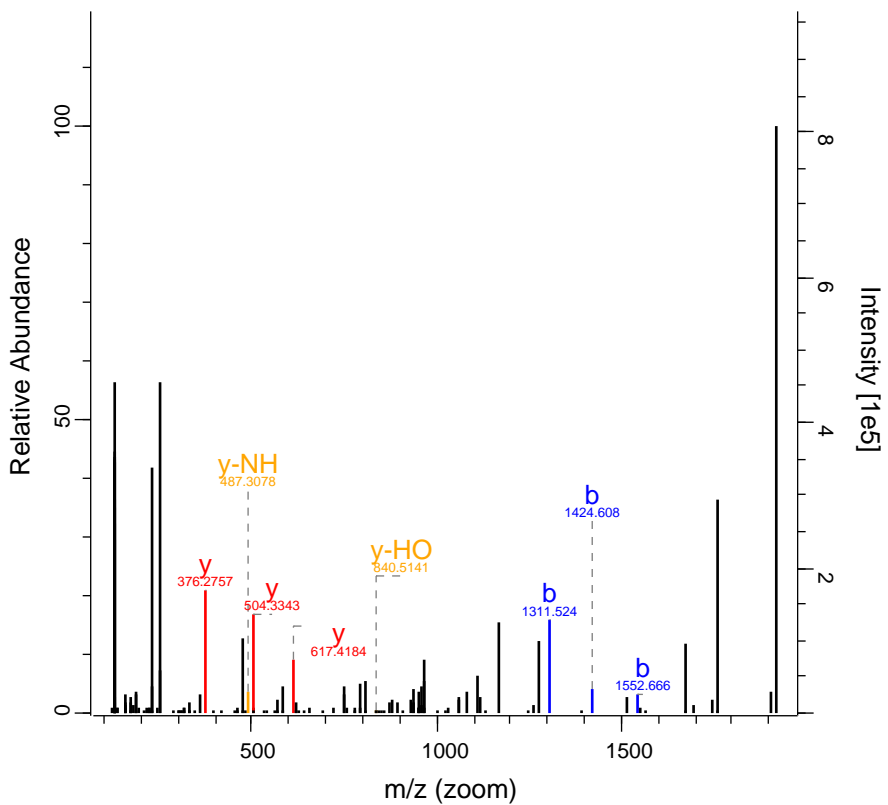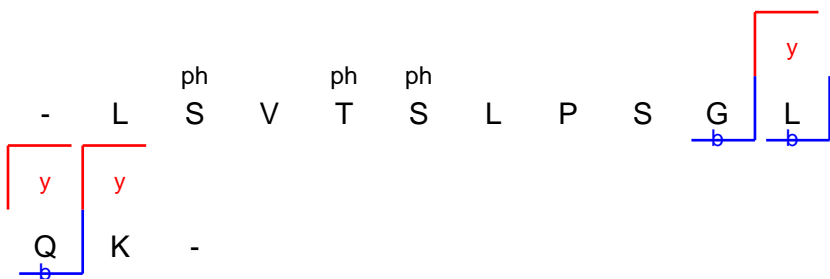

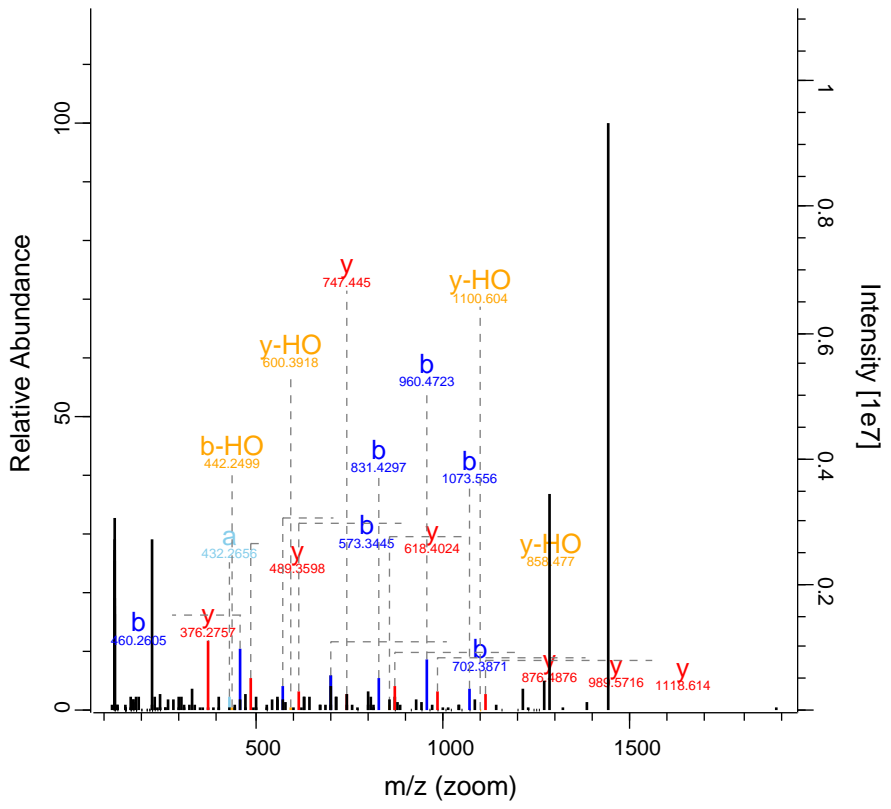

RO-QC-160121\_ZackD\_SS\_Set\_02\_Fraction 21671 FTMS; HC 66.39 746.06 PRDM11

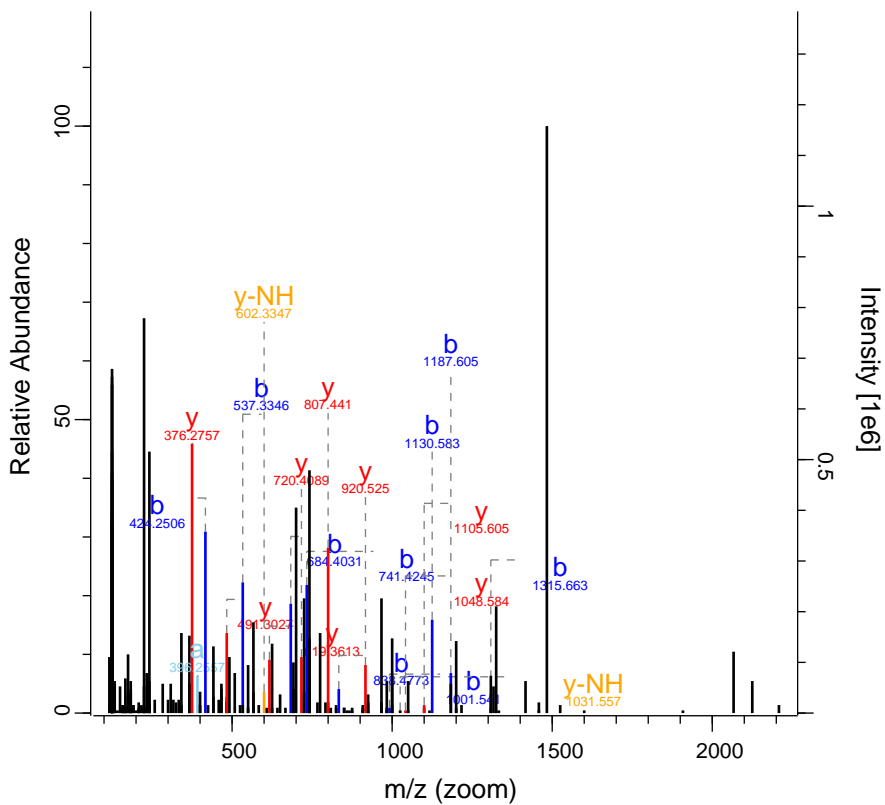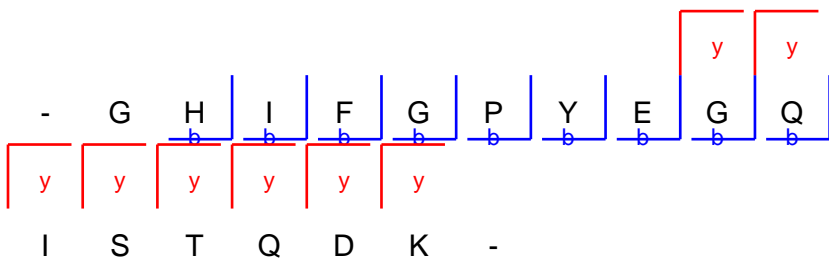

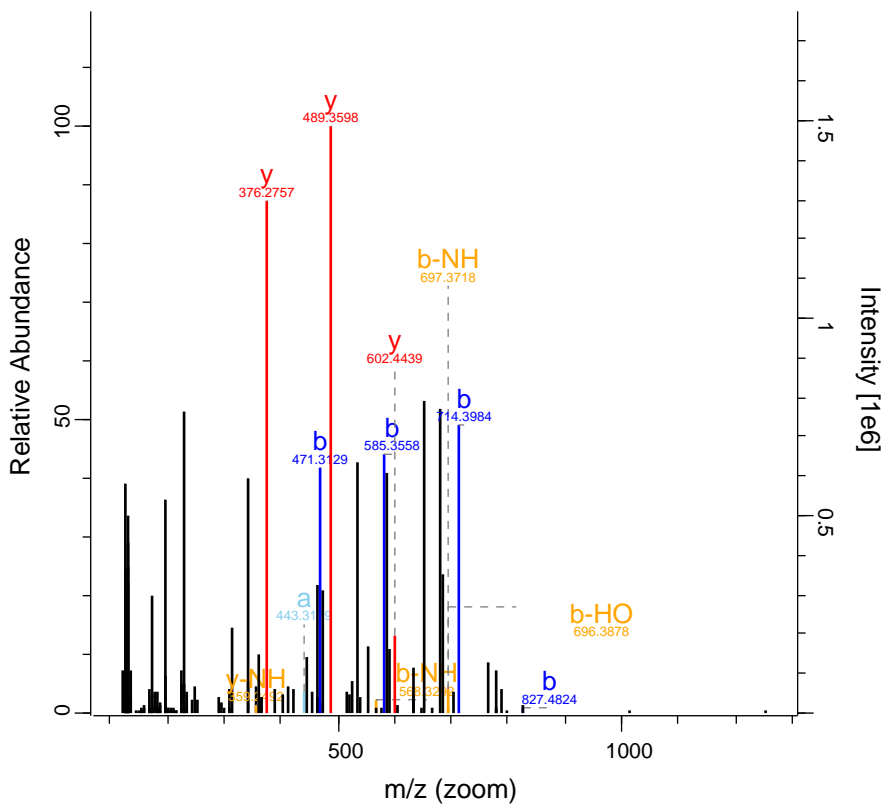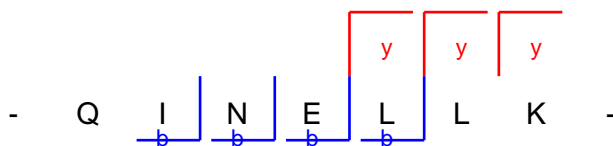



RO-QC-160121\_ZackD\_SS\_Set\_02\_Fraction 22703 FTMS; HC 115.49 429.59 KANSL2

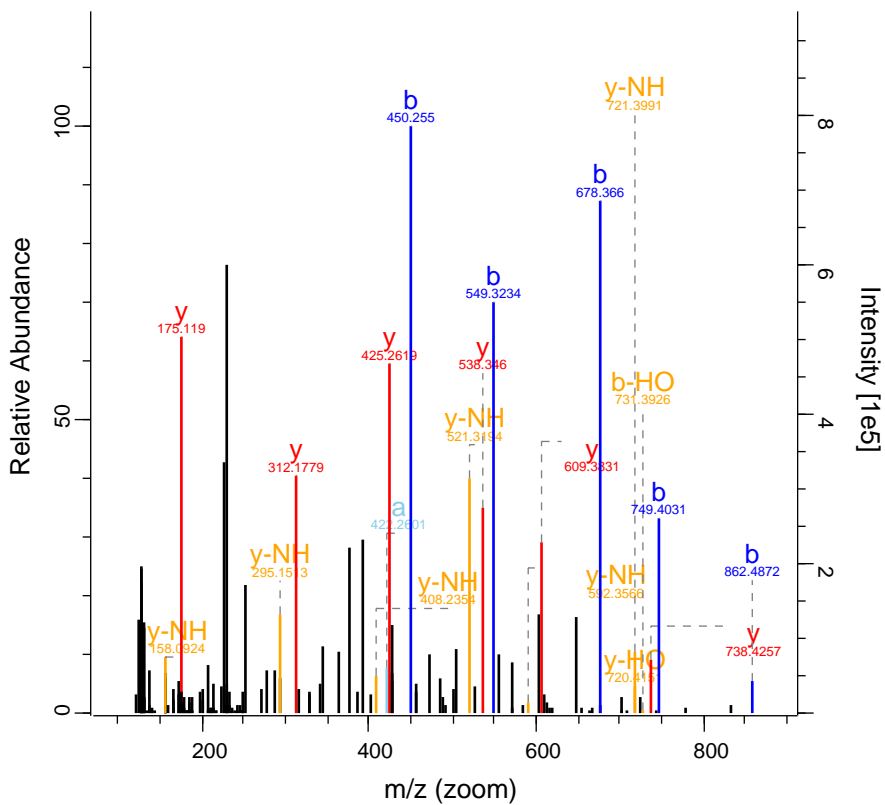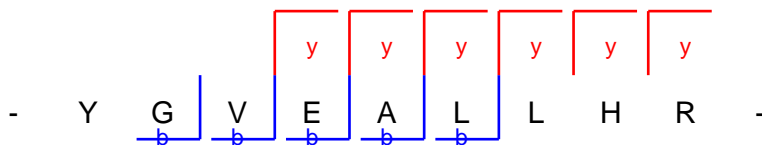

RO-QC-160121\_ZackD\_SS\_Set\_02\_Fraction 22950 FTMS; HC 140.75 538.97 SEC61B

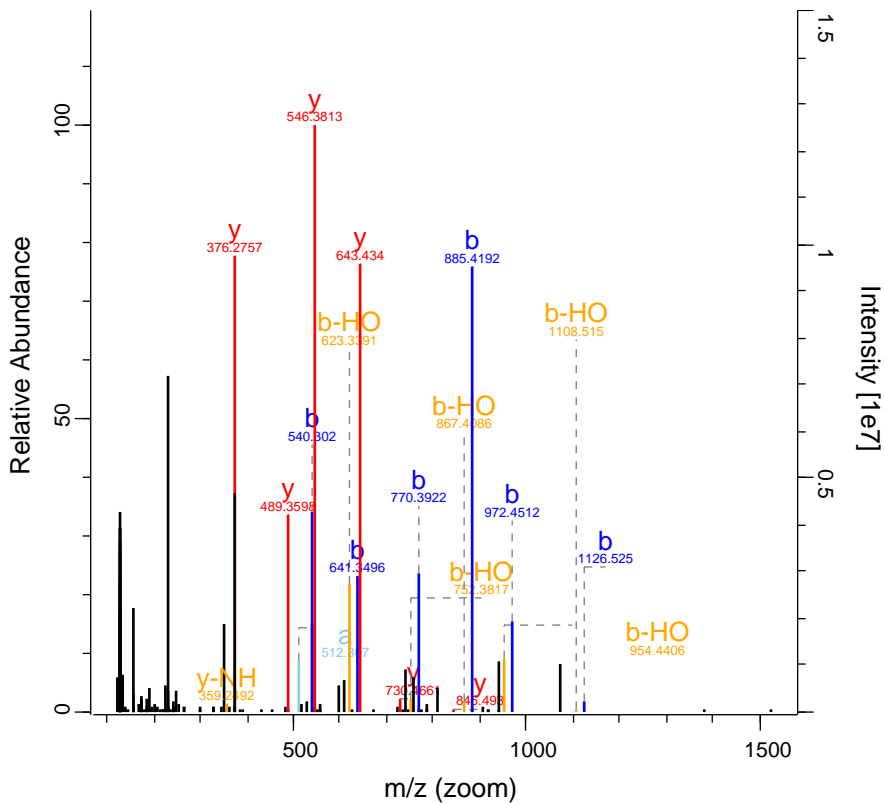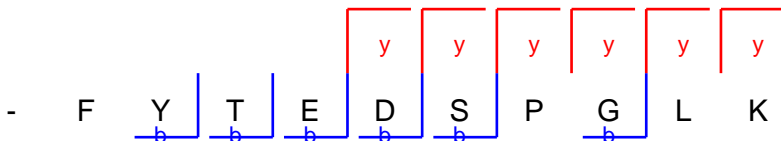



RO-QC-160121\_ZackD\_SS\_Set\_02\_Fraction 23369 FTMS; HC 129.89 793.98 POLR3F

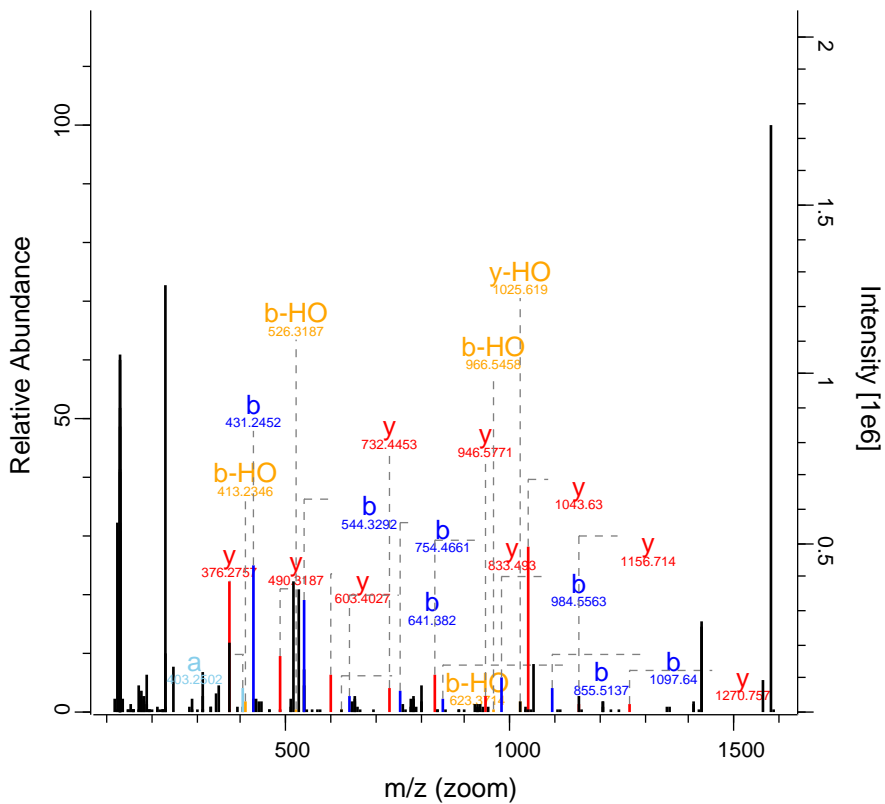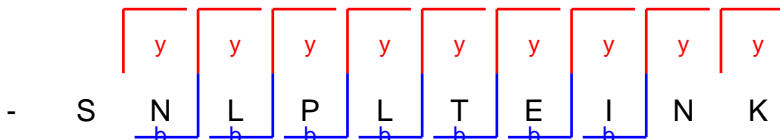

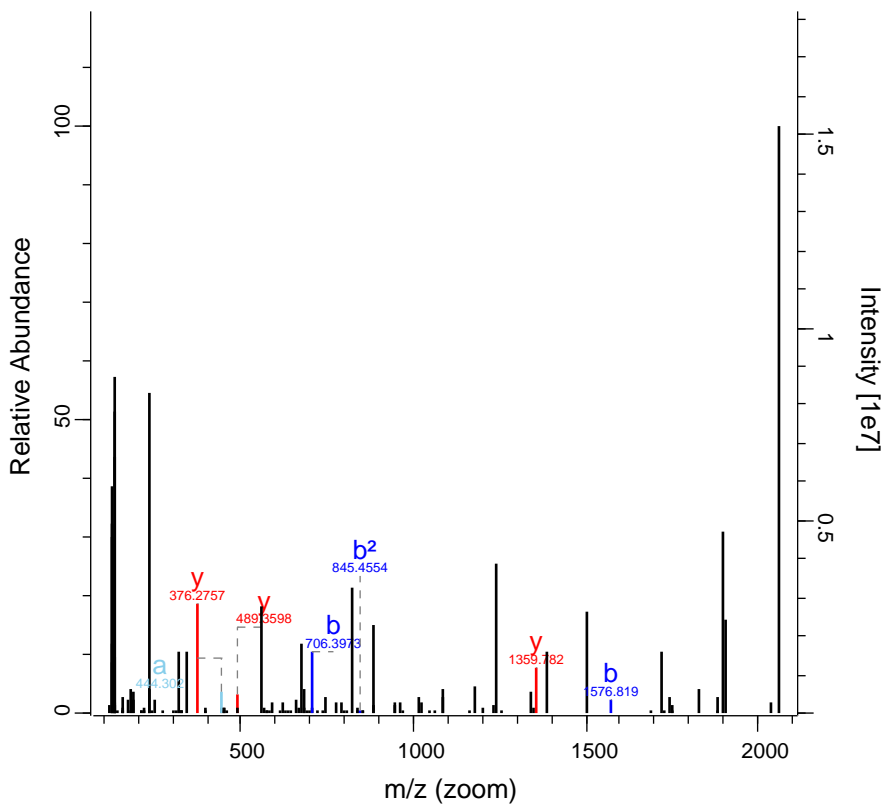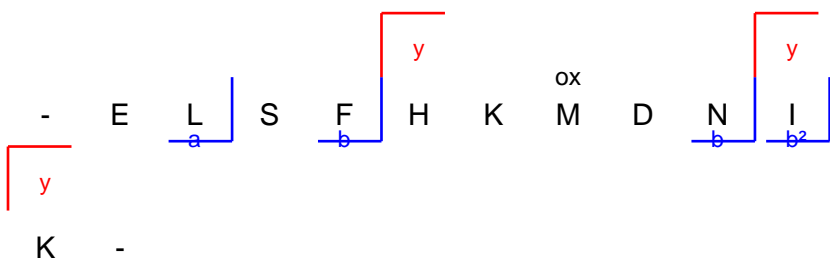

RO-QC-160121\_ZackD\_SS\_Set\_02\_Fractio 25168 FTMS; HC 138.02 1080.58 CD99L2

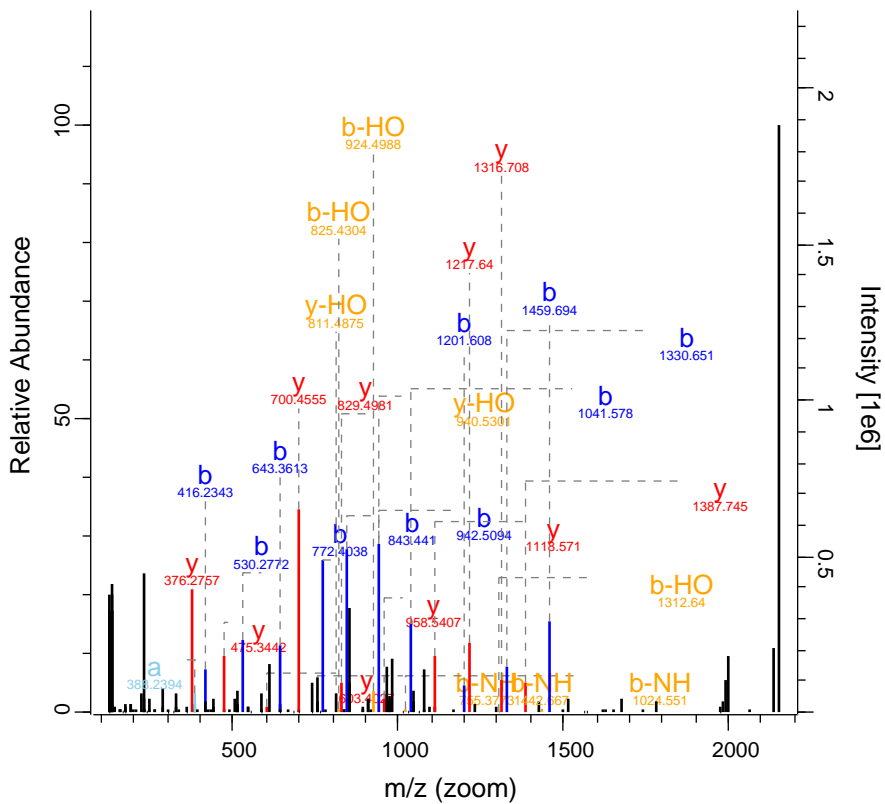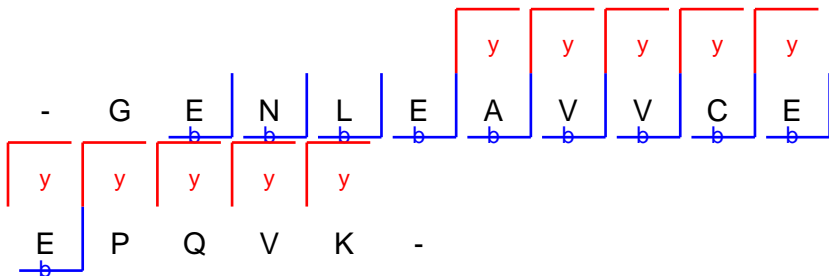

RO-QC-160121\_ZackD\_SS\_Set\_02\_Fraction 25336 FTMS; HC 82.59 720.38 CD99L2

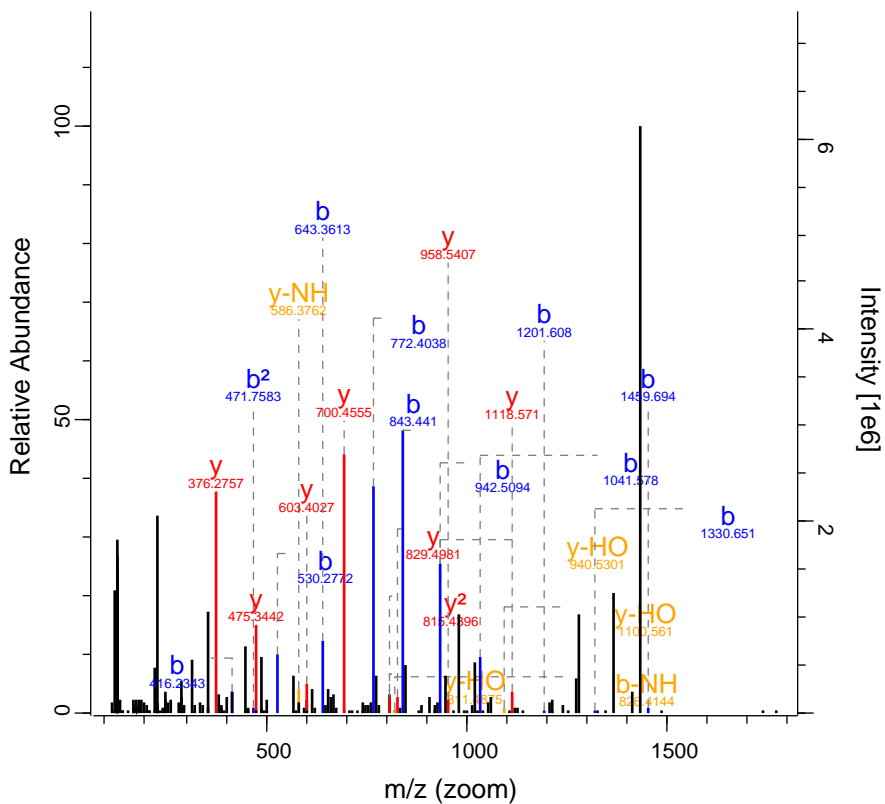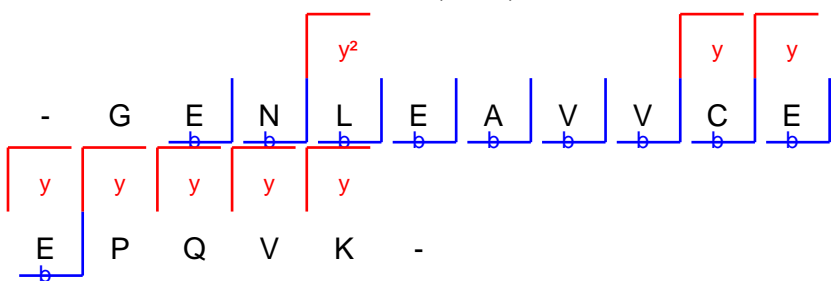

RO-QC-160121\_ZackD\_SS\_Set\_02\_Fratio 25420 FTMS; HC 138.78 1009.17 MIB2

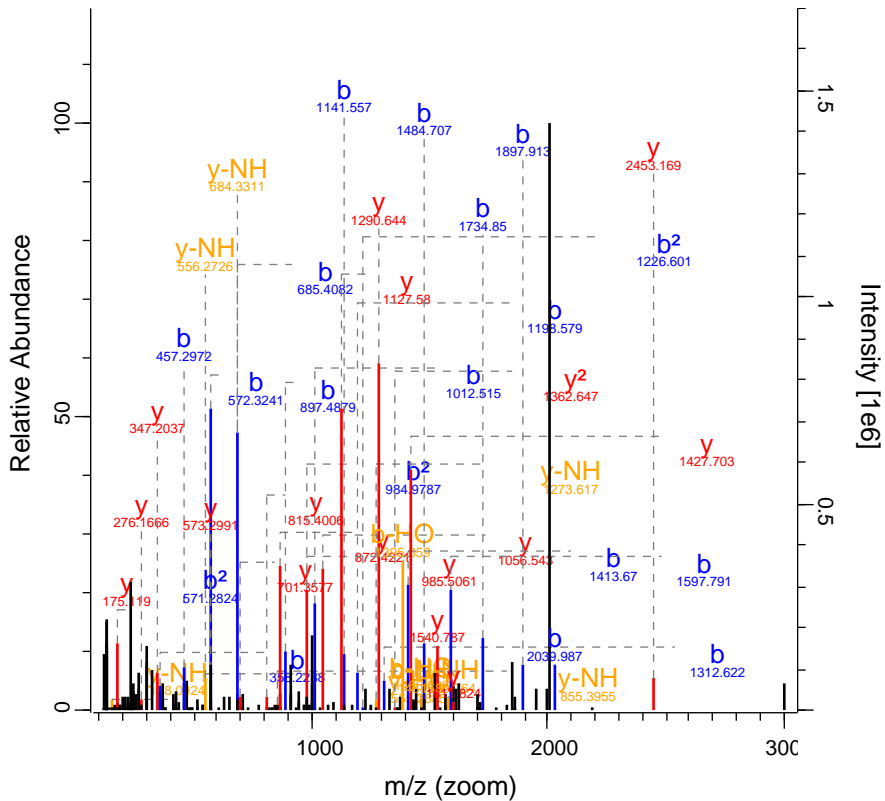



RO-QC-160121\_ZackD\_SS\_Set\_02\_Fraccio 25472 FTMS; HC 188.22 1008.83 MIB2

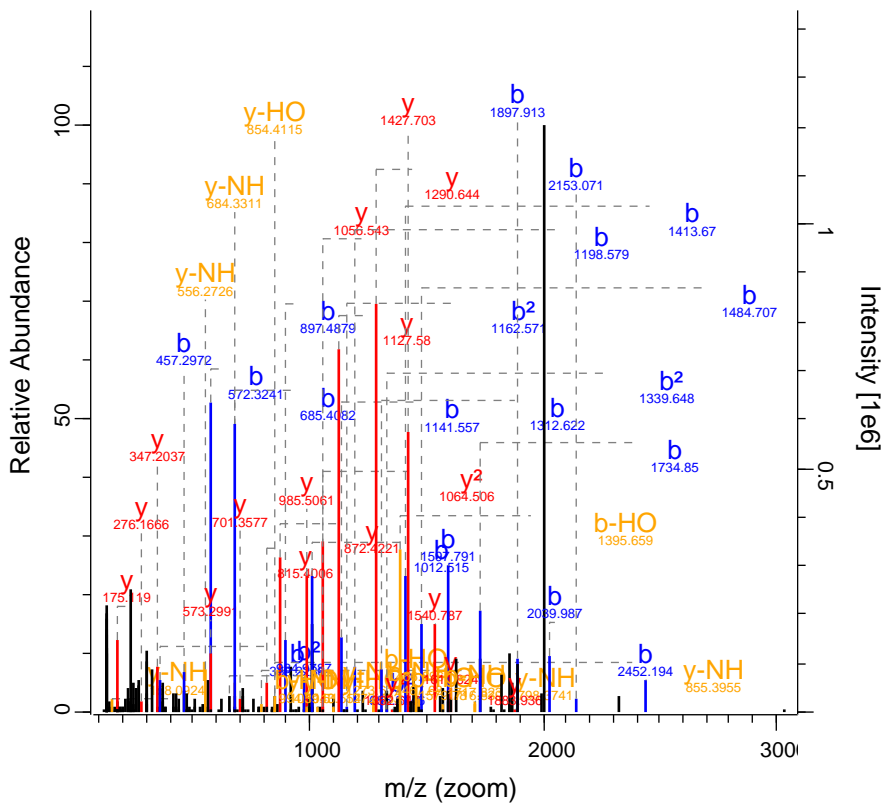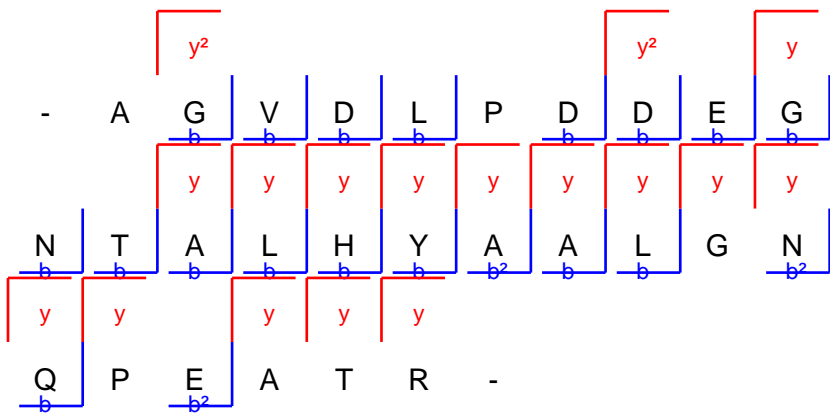

RO-QC-160121\_ZackD\_SS\_Set\_02\_Fraction 25989 FTMS; HC 44.2 595.98 MRPL35

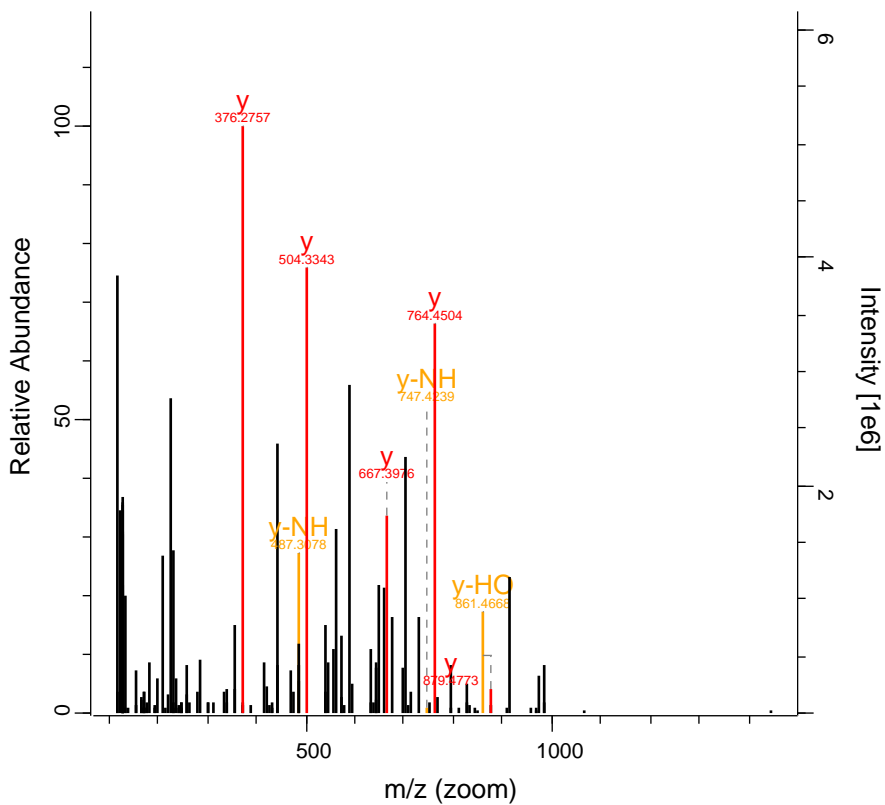

m/z (zoom)



Raw File

Scan Method Score m/z

RO-QC-160121\_ZackD\_SS\_Set\_02\_Fraction\_12

26028 FTMS; HCD 85.85 678.39

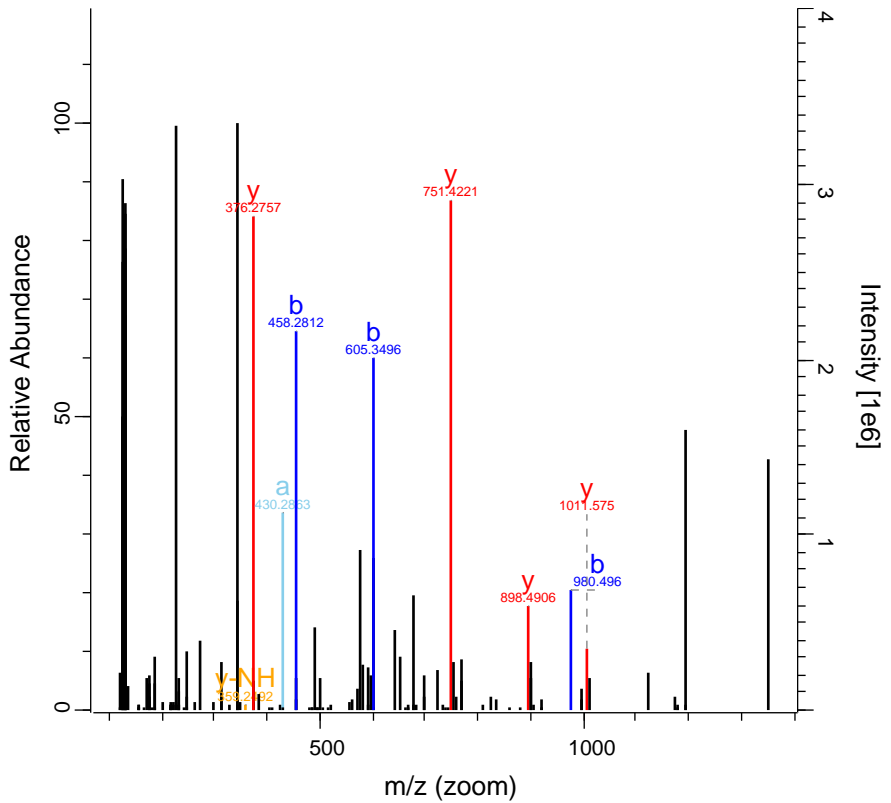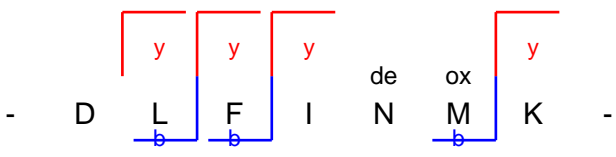

RO-QC-160121\_ZackD\_SS\_Set\_02\_Fraction 27321 FTMS; HC 88.09 544.3 SLC2A8

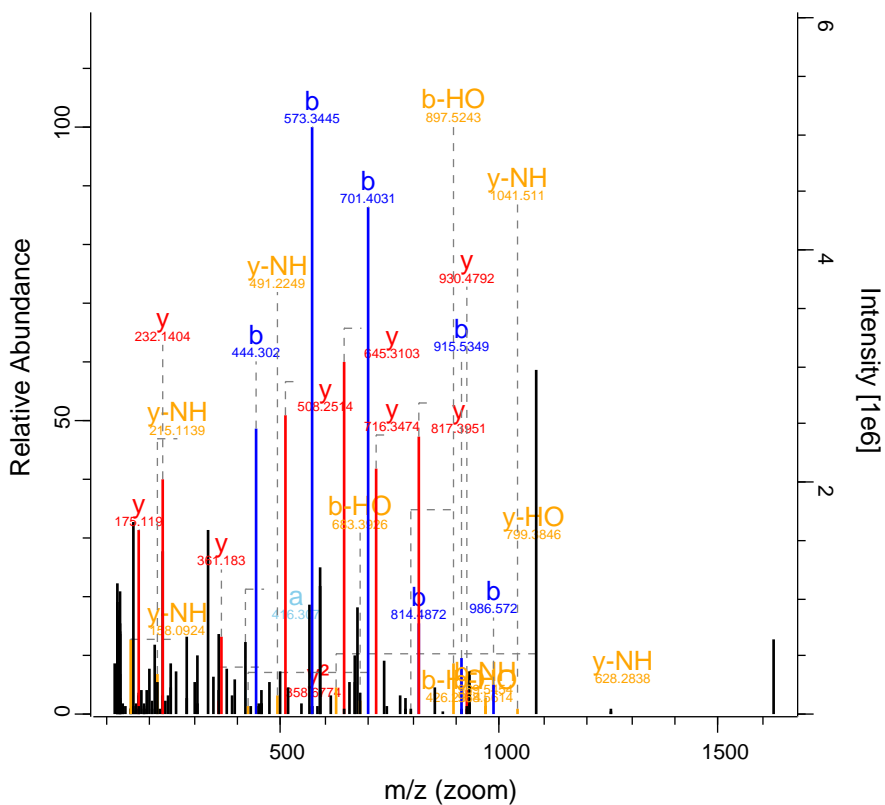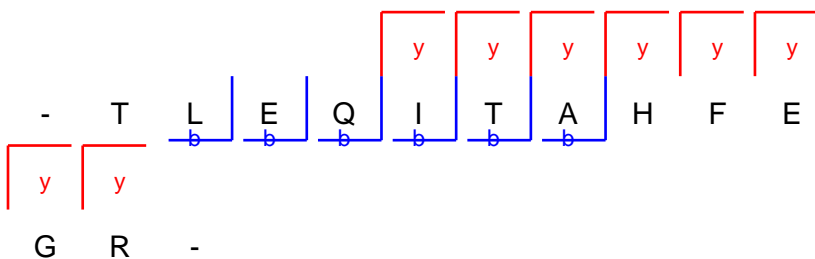

RO-QC-160121\_ZackD\_SS\_Set\_02\_Fraction 28930 FTMS; HC 156.01 875.5 SEC22A

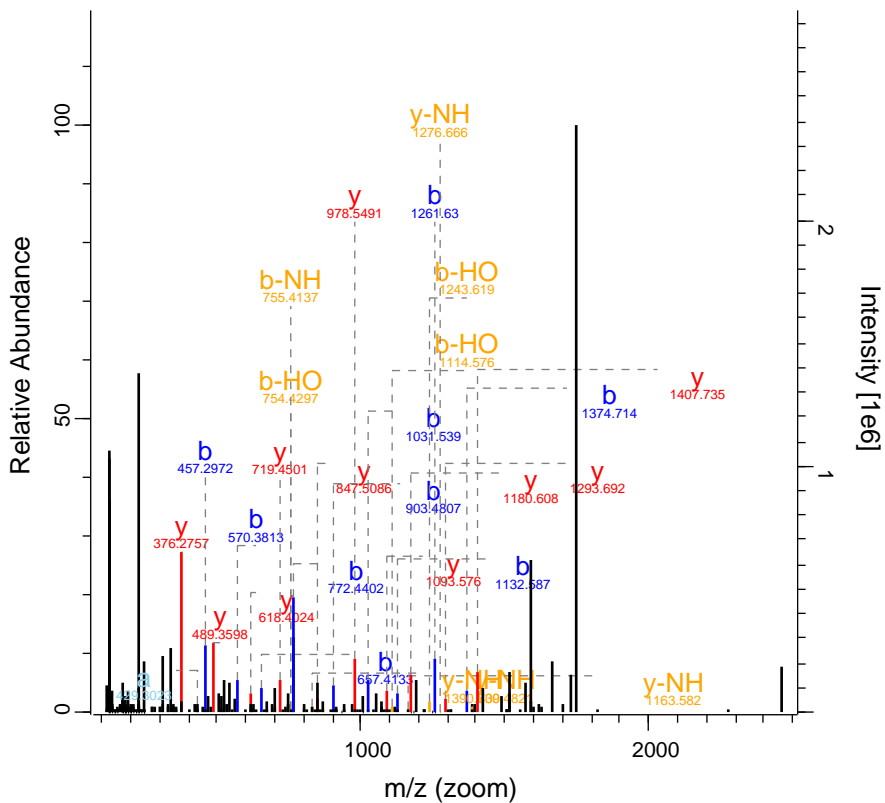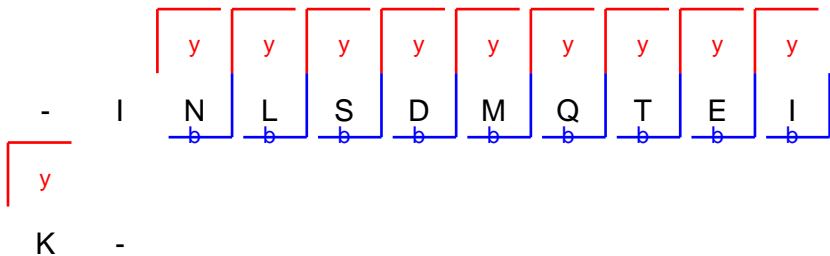

RO-QC-160121\_ZackD\_SS\_Set\_02\_Fraction 29117 FTMS; HC 53.55 550.3 FOXN3

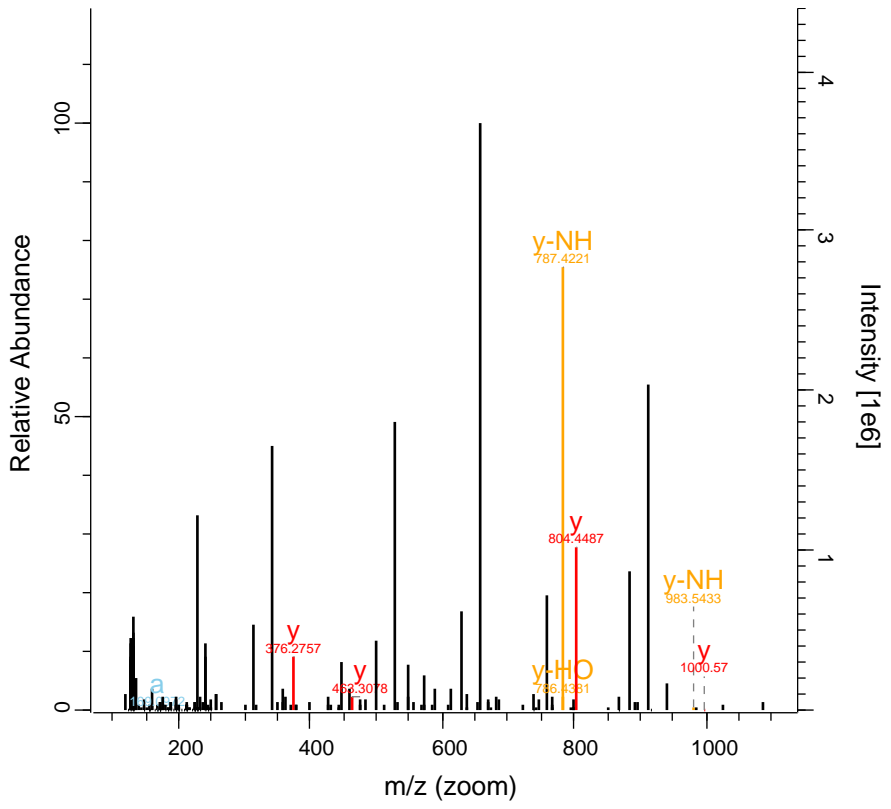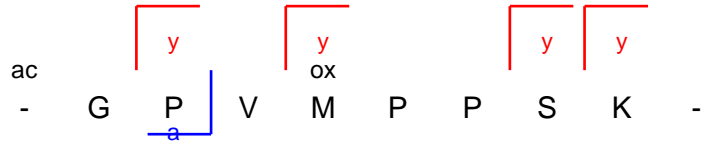

RO-QC-160121\_ZackD\_SS\_Set\_02\_Fraction 30405 FTMS; HC 64.55 601.03 FAM184B

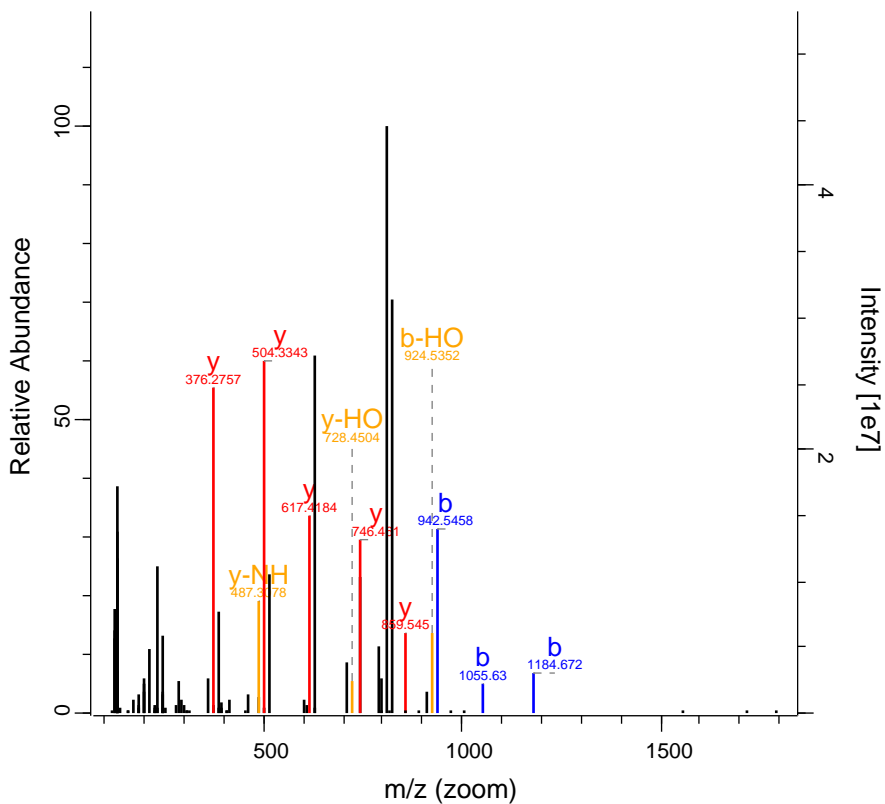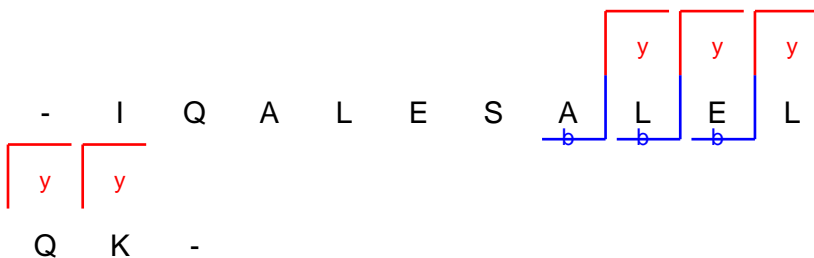

RO-QC-160121\_ZackD\_SS\_Set\_02\_Fraction 30406 FTMS; HC 86.9 901.05 FAM184B

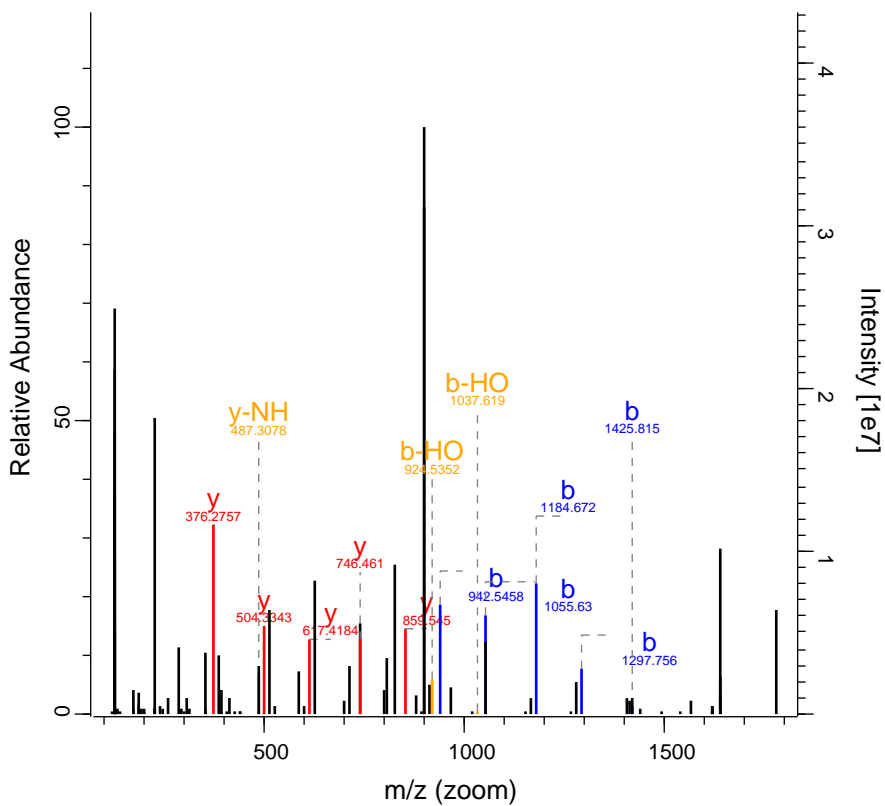



RO-QC-160121\_ZackD\_SS\_Set\_02\_Fraction1 30543 FTMS; HC 137.16 820.94 LRP10

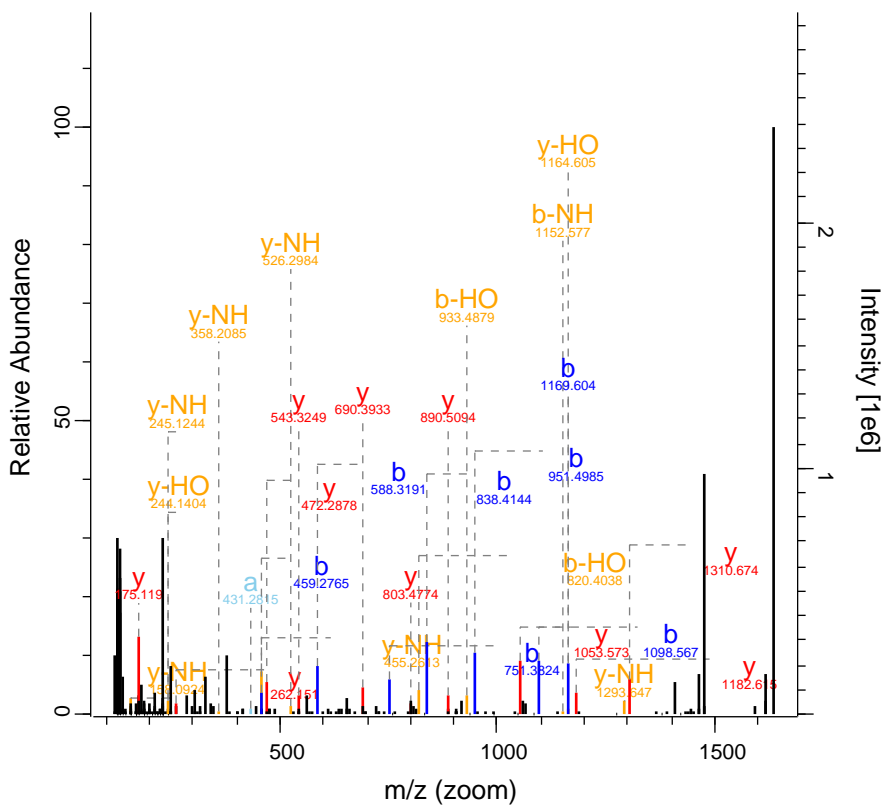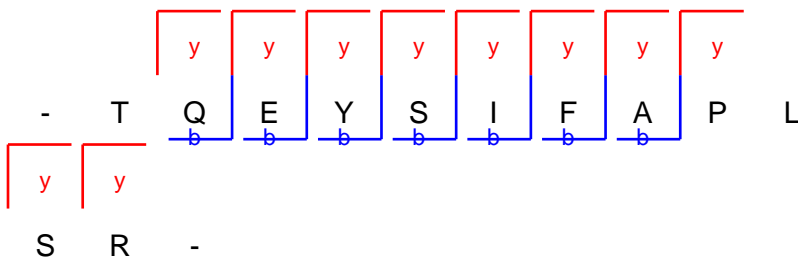

RO-QC-160121\_ZackD\_SS\_Set\_02\_Fraction 30632 FTMS; HC 68.28 547.63 LRP10

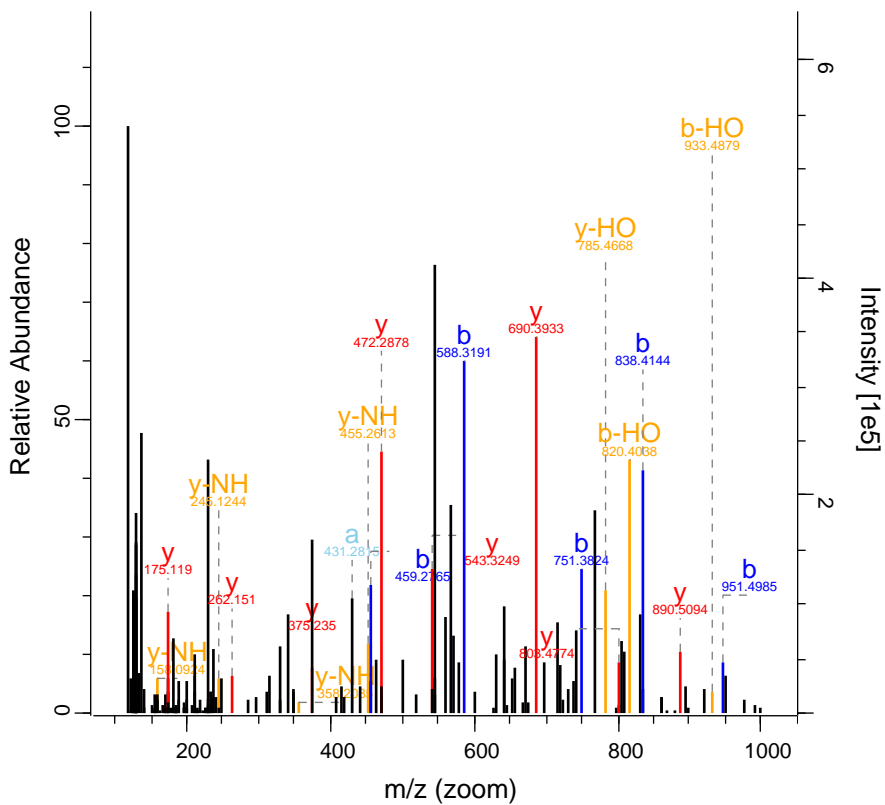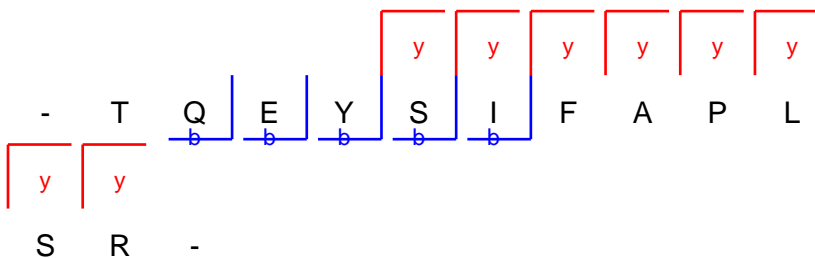

RO-QC-160121\_ZackD\_SS\_Set\_02\_Fraction 30730 FTMS; HC 40.38 601.37 FAM184B

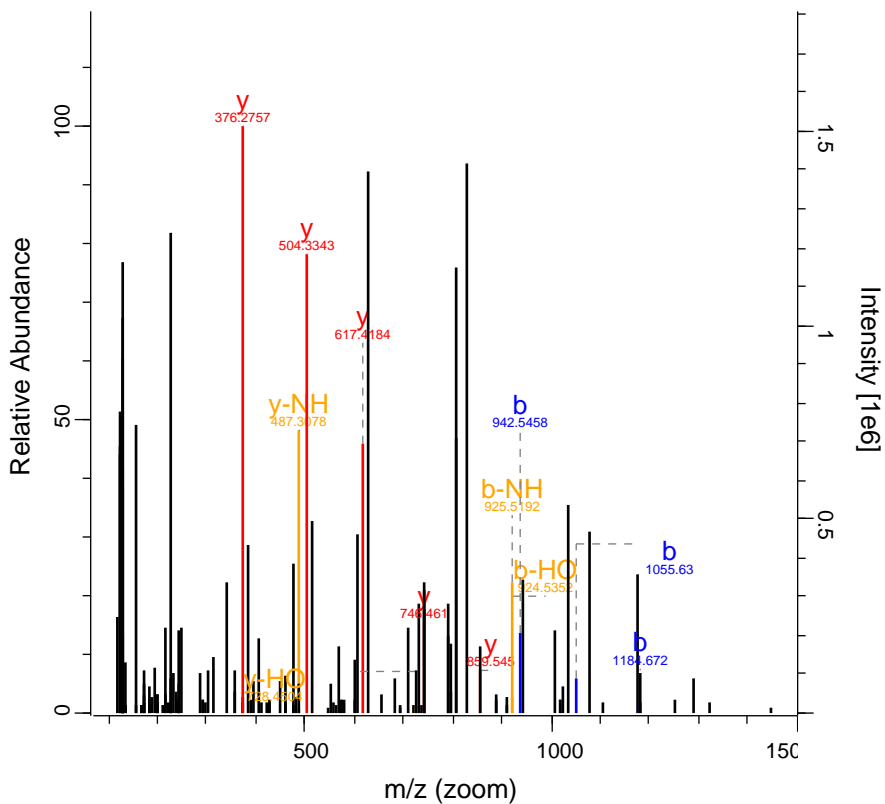



RO-QC-160121\_ZackD\_SS\_Set\_02\_Fraction 30927 FTMS; HC 64.55 601.03 FAM184B

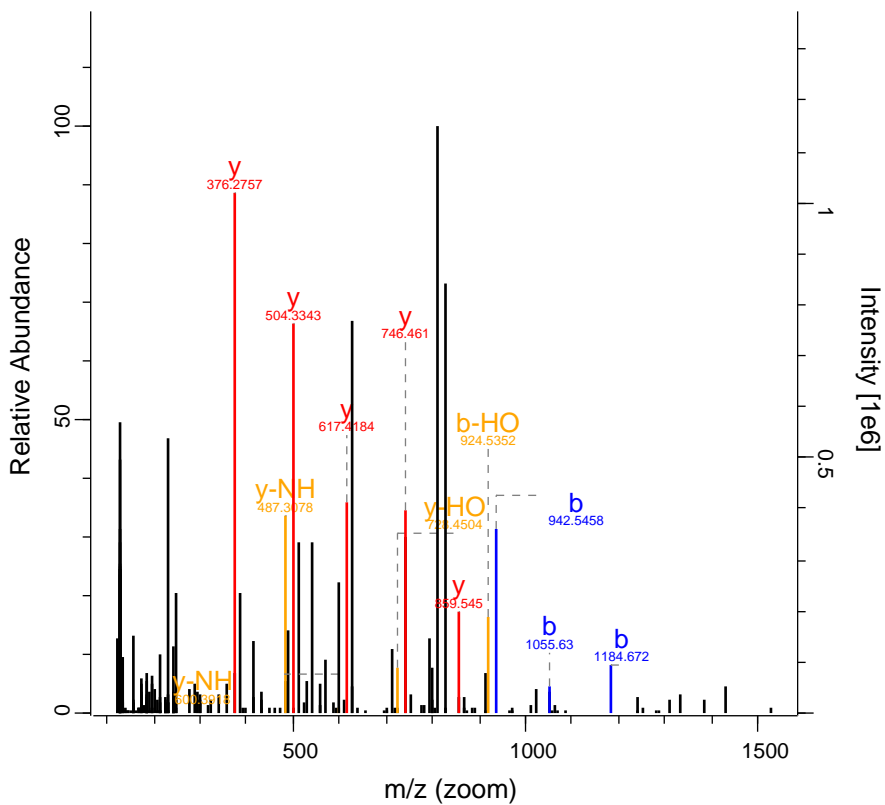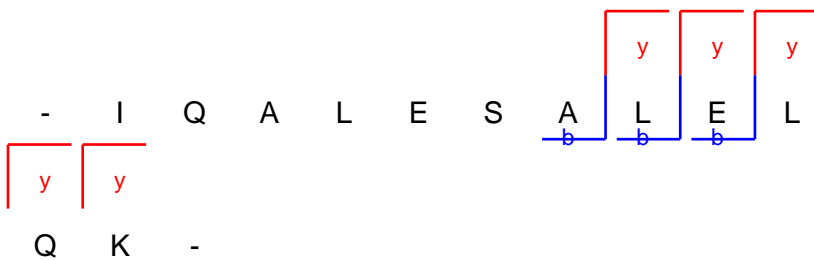

RO-QC-160121\_ZackD\_SS\_Set\_02\_Fraction 31511 FTMS; HC 44.43 657.04 SLC46A3

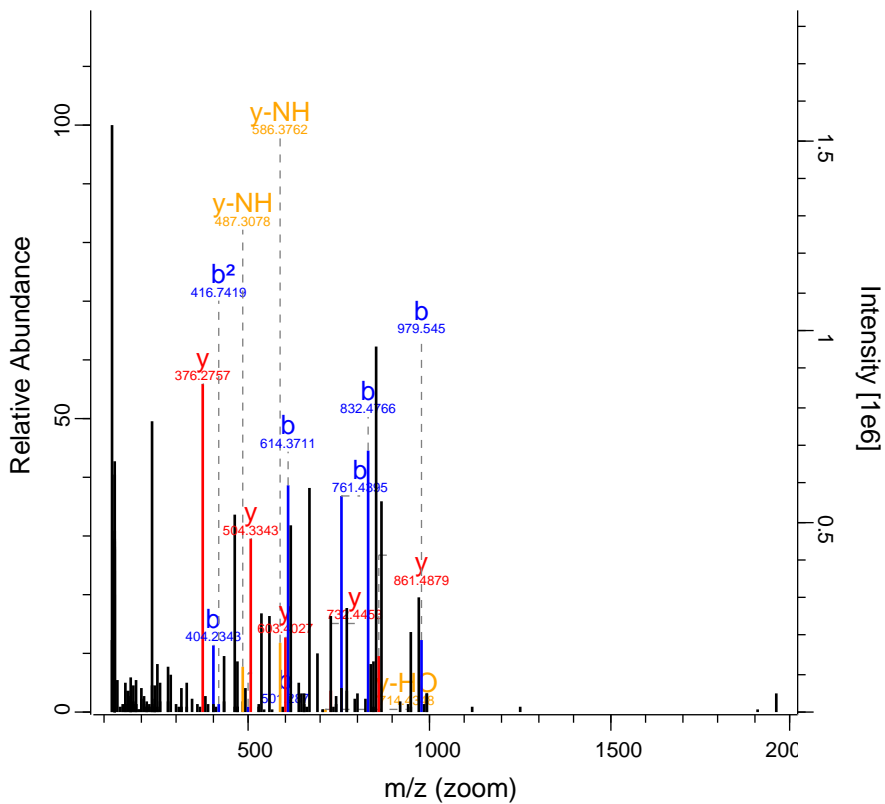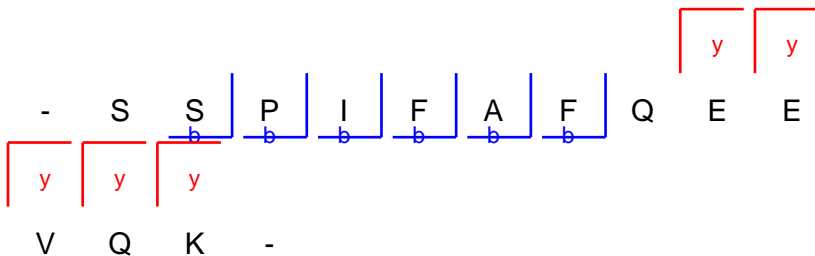

RO-QC-160121\_ZackD\_SS\_Set\_02\_Fraction 31531 FTMS; HC 104.79 985.05 SLC46A3

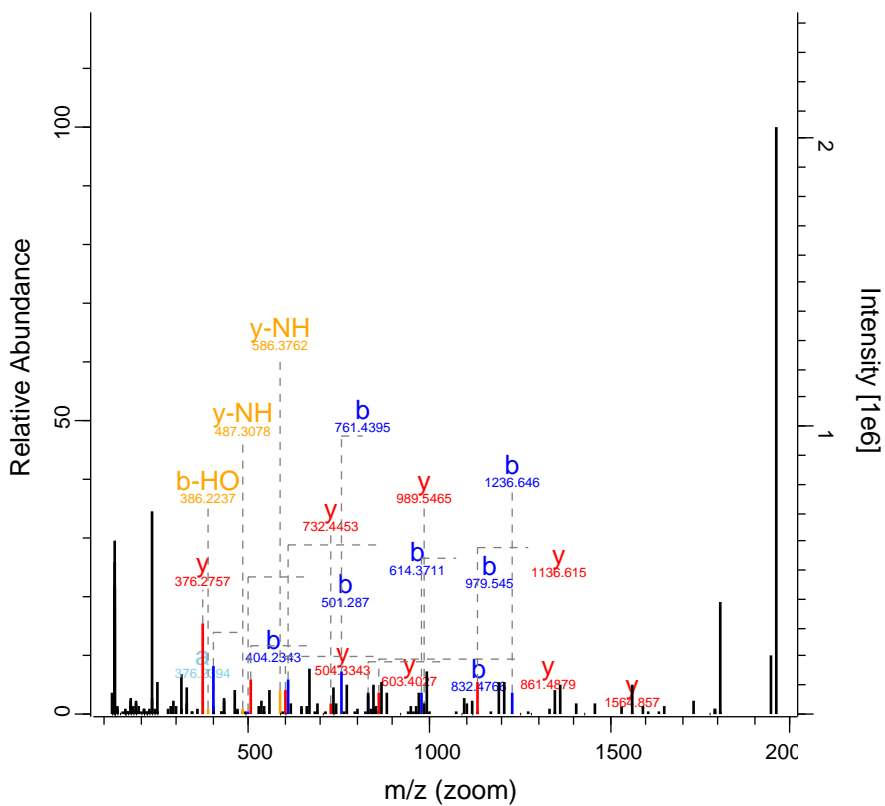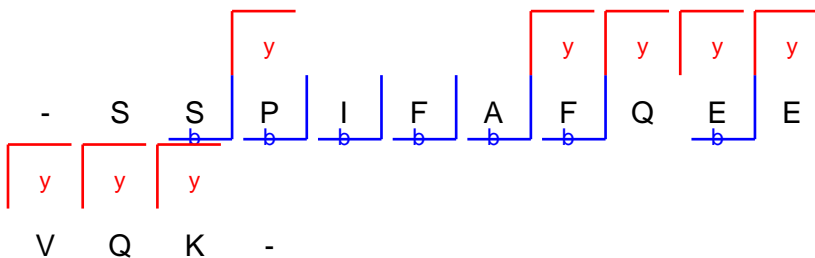

Raw File

Scan Method Score m/z

RO-QC-160121\_ZackD\_SS\_Set\_02\_Fraction\_12

31652 FTMS; HCD 133.55 701.93

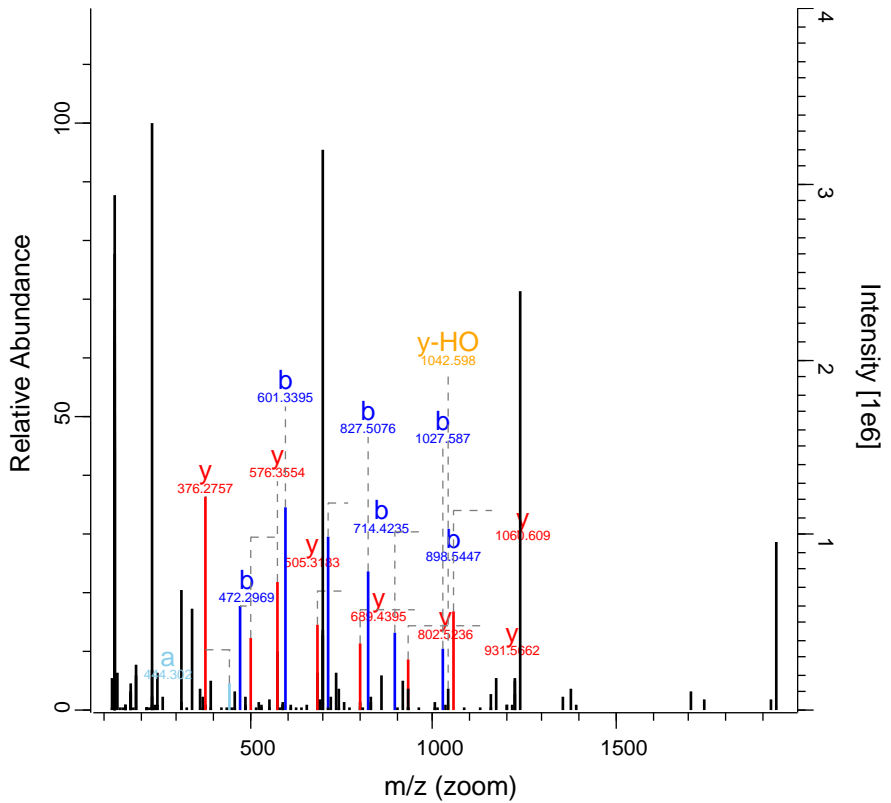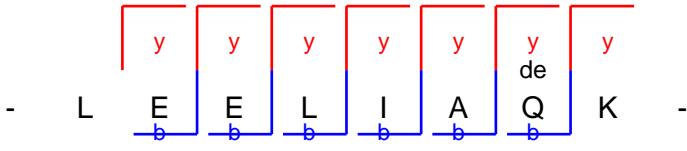



RO-QC-160121\_ZackD\_SS\_Set\_02\_Fraction 31699 FTMS; HC 64.22 657.04 SLC46A3

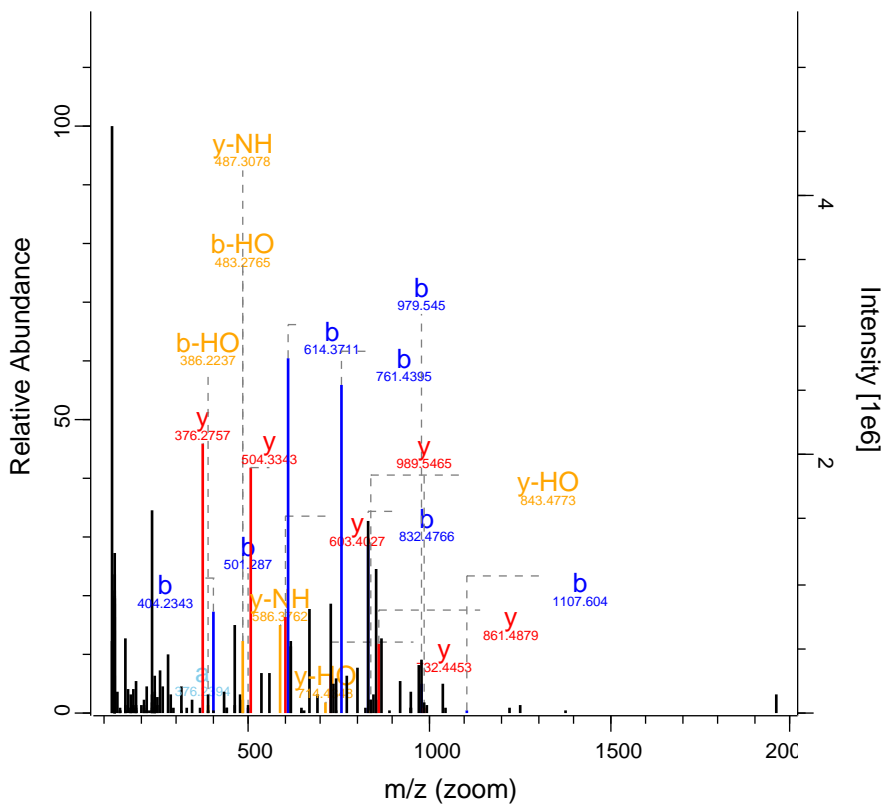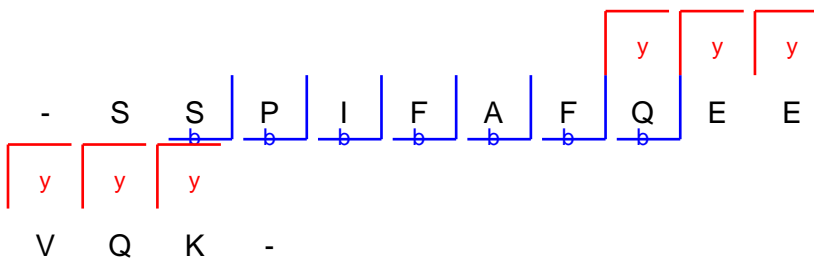

RO-QC-160121\_ZackD\_SS\_Set\_02\_Fraction 31781 FTMS; HC 120.12 715.46 HAUS2

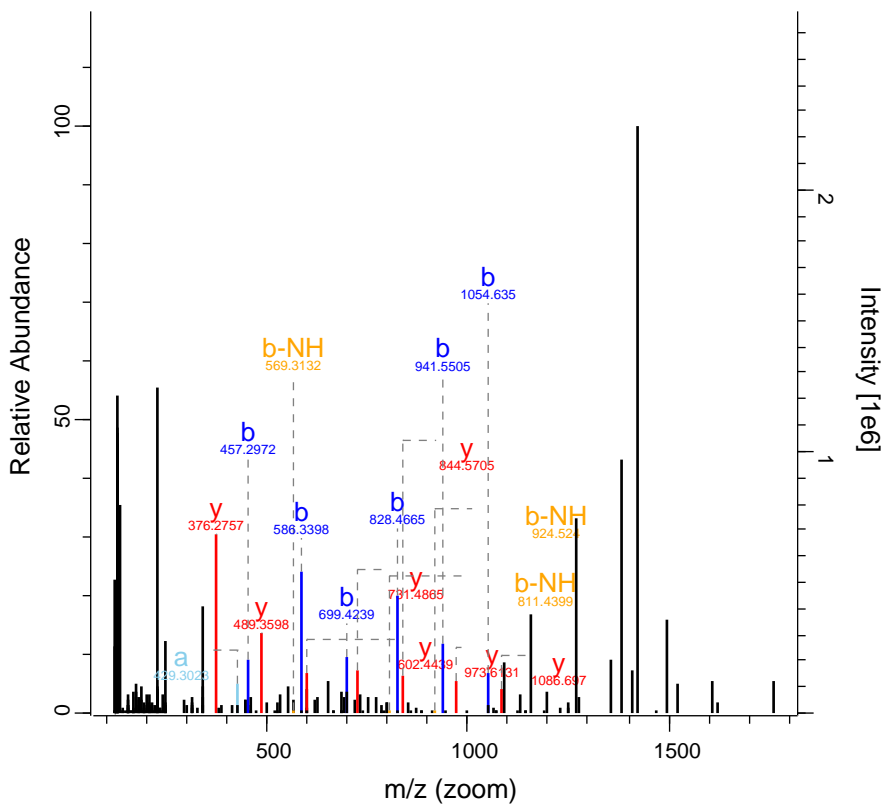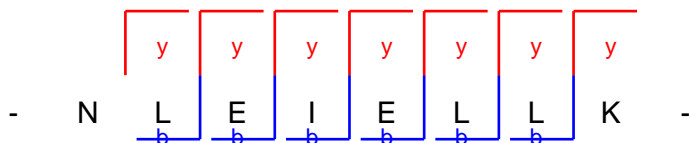







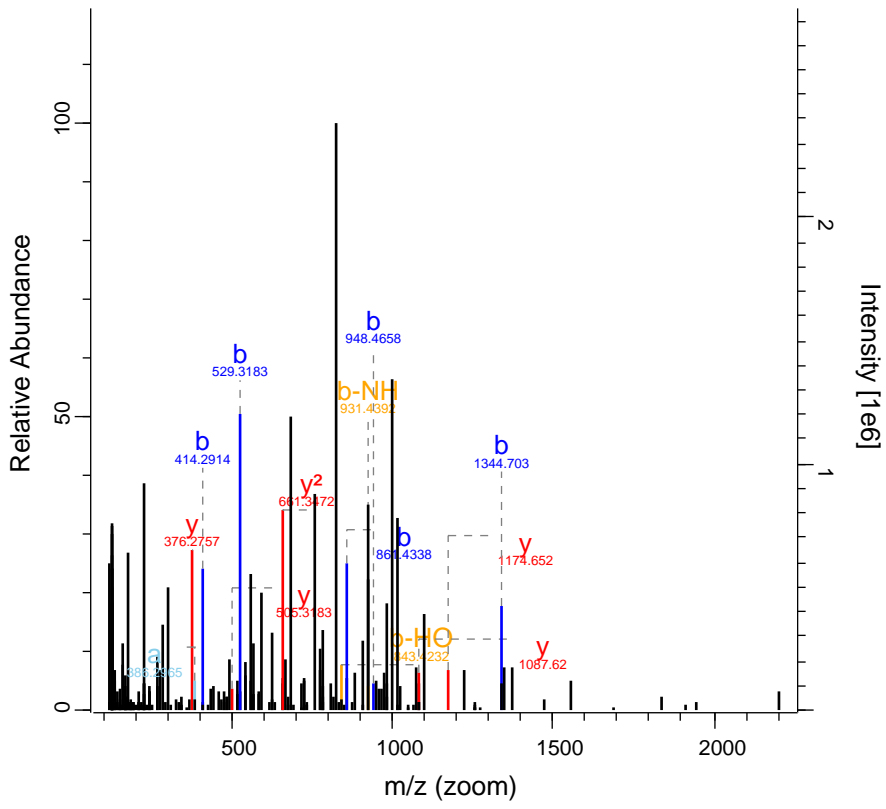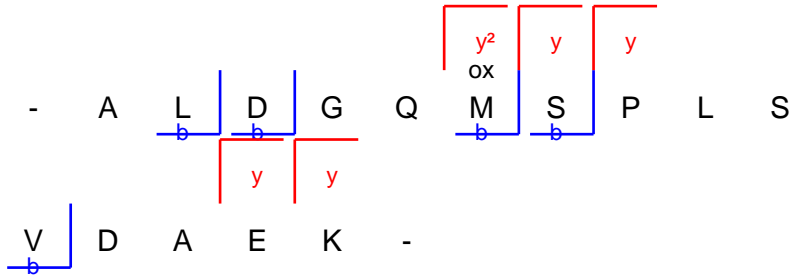

RO-QC-160121\_ZackD\_SS\_Set\_02\_Fraction 34498 FTMS; HC 37.99 570.63 POP5

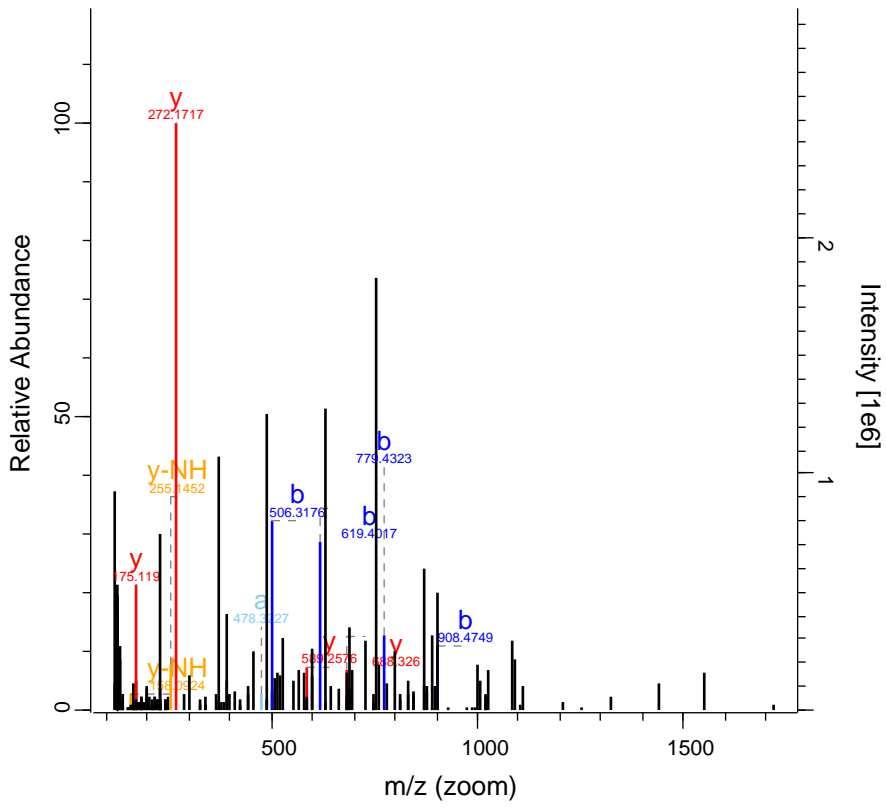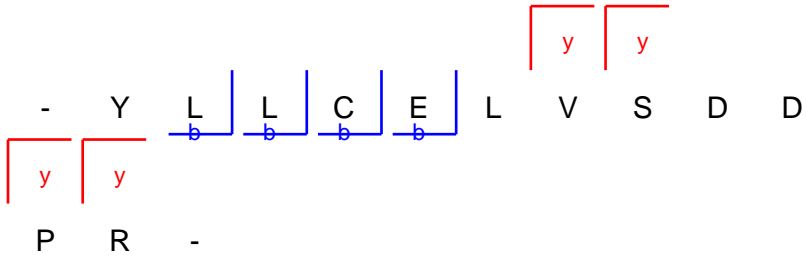

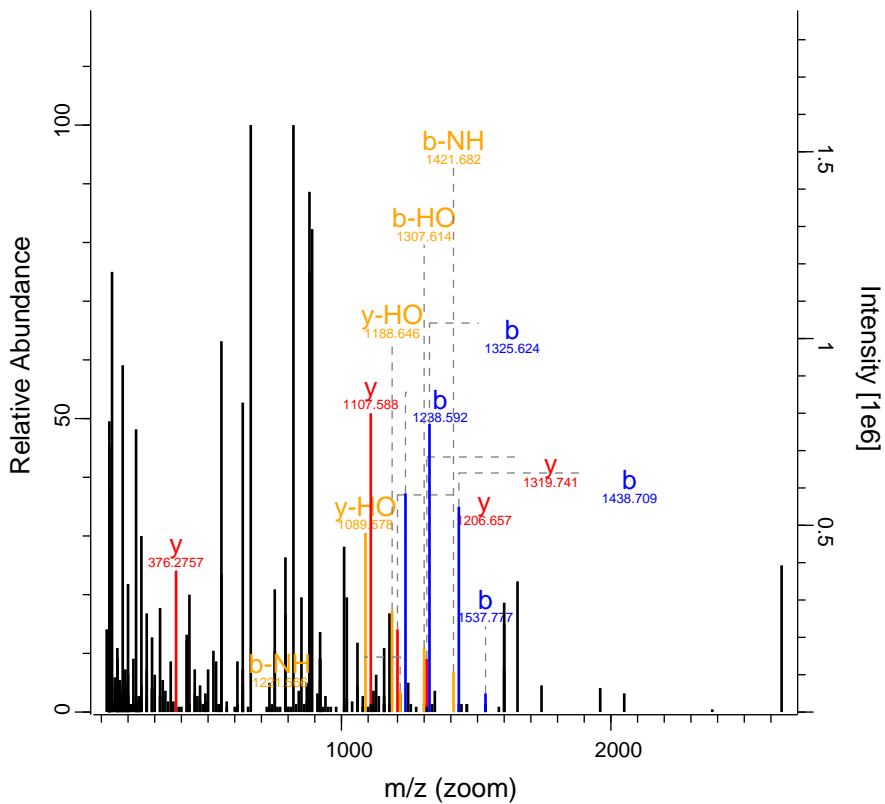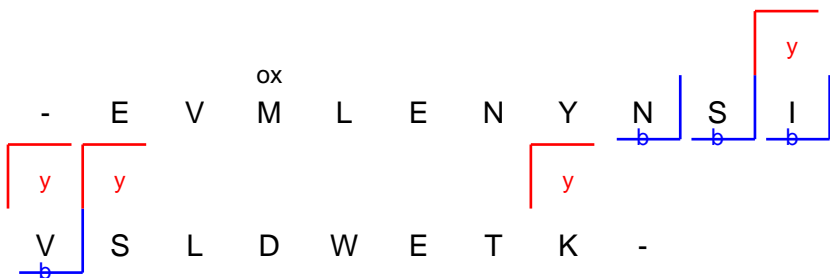



RO-QC-160121\_ZackD\_SS\_Set\_02\_Fraction 35485 FTMS; HC 93.23 646.03 METRN

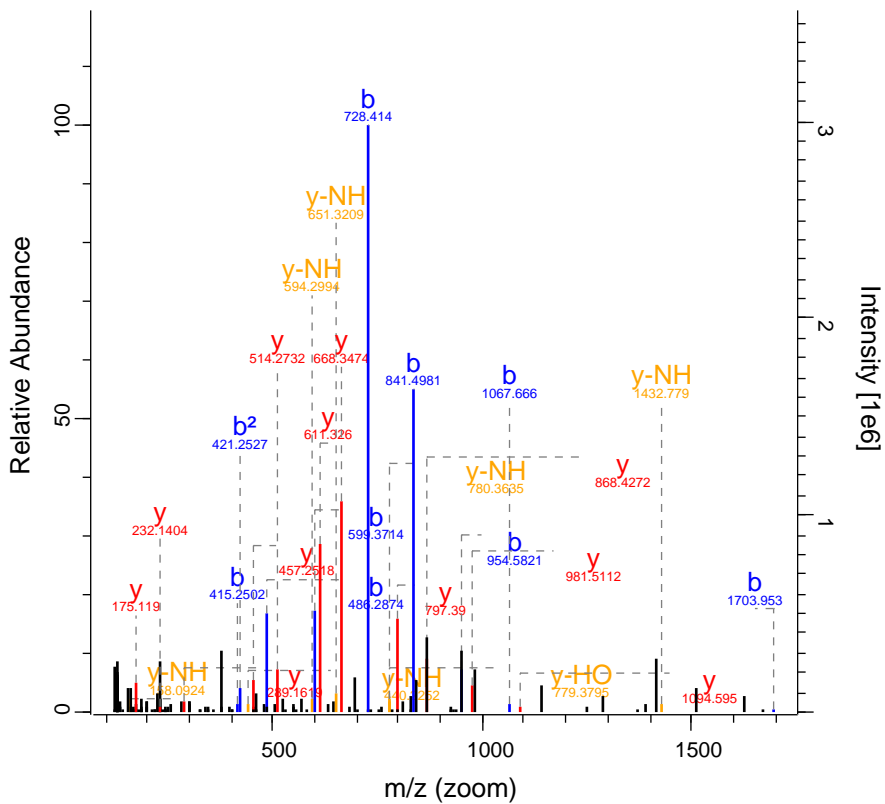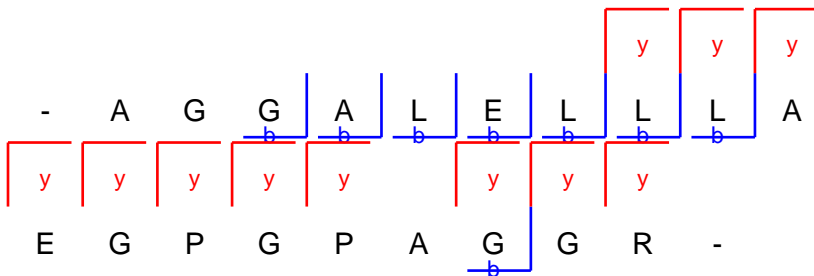

RO-QC-160121\_ZackD\_SS\_Set\_02\_Fraction 35892 FTMS; HC 45.33 600.1 HMGXB3

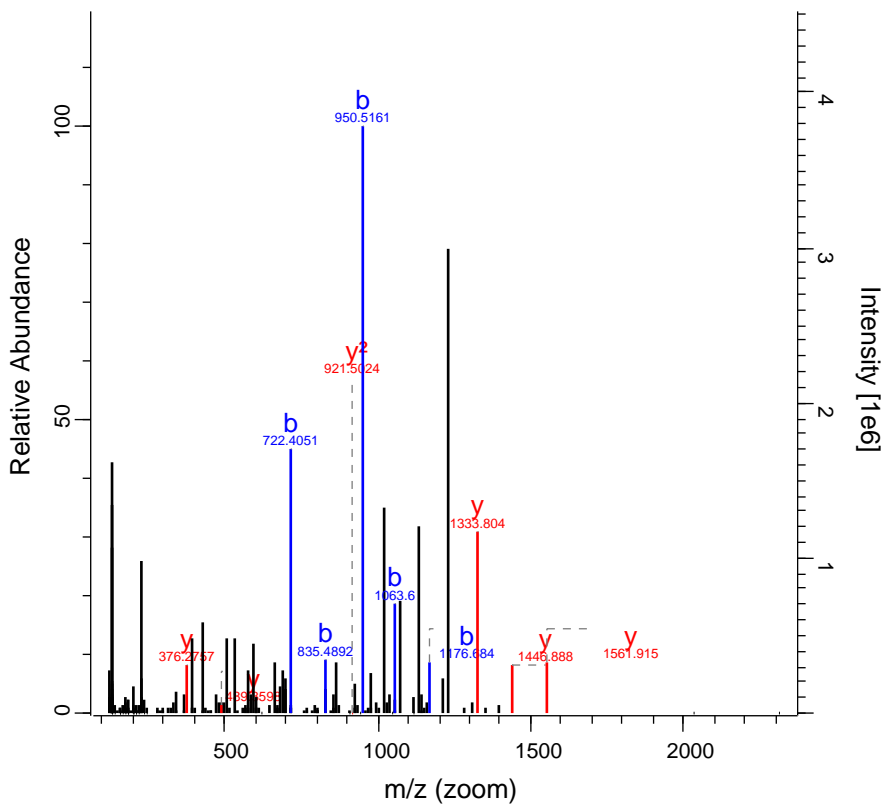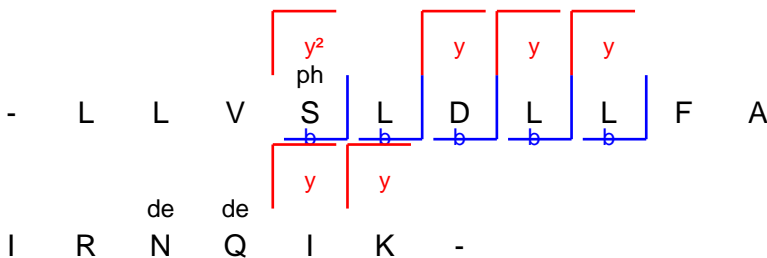



| Raw File                                 | Scan  | Method    | Score | m/z   |
|------------------------------------------|-------|-----------|-------|-------|
| RO-QC-160121_ZackD_SS_Set_02_Fraction_12 | 37333 | FTMS; HCD | 87.31 | 888.5 |

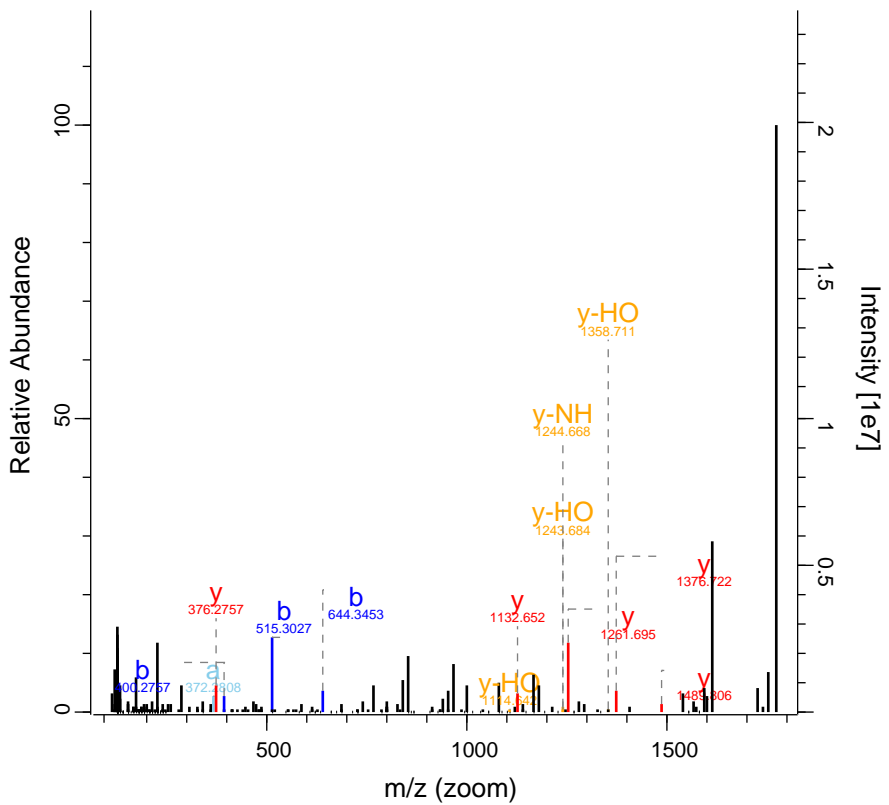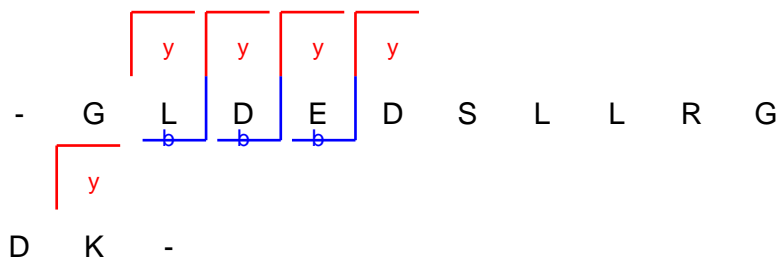

RO-QC-160121\_ZackD\_SS\_Set\_02\_Fraction 37979 FTMS; HC 46.32 662.68 TOMM7

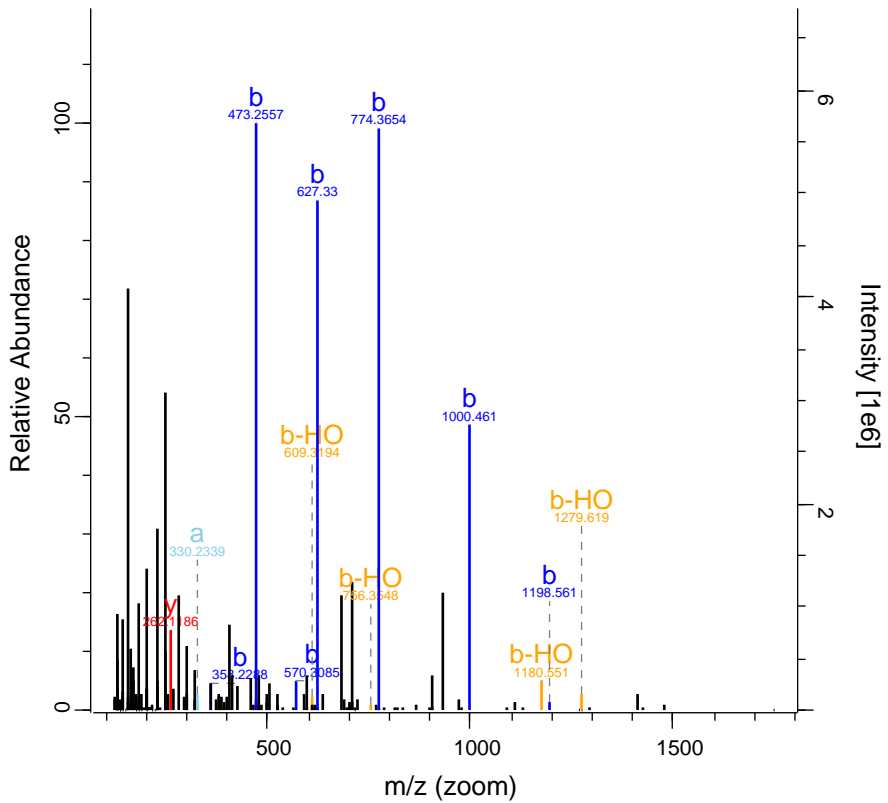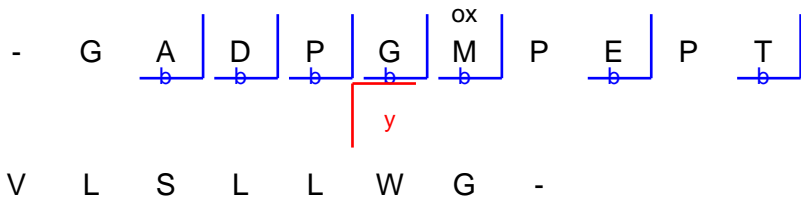

RO-QC-160121\_ZackD\_SS\_Set\_02\_Fraction 37981 FTMS; HC 117.02 993.52 TOMM7

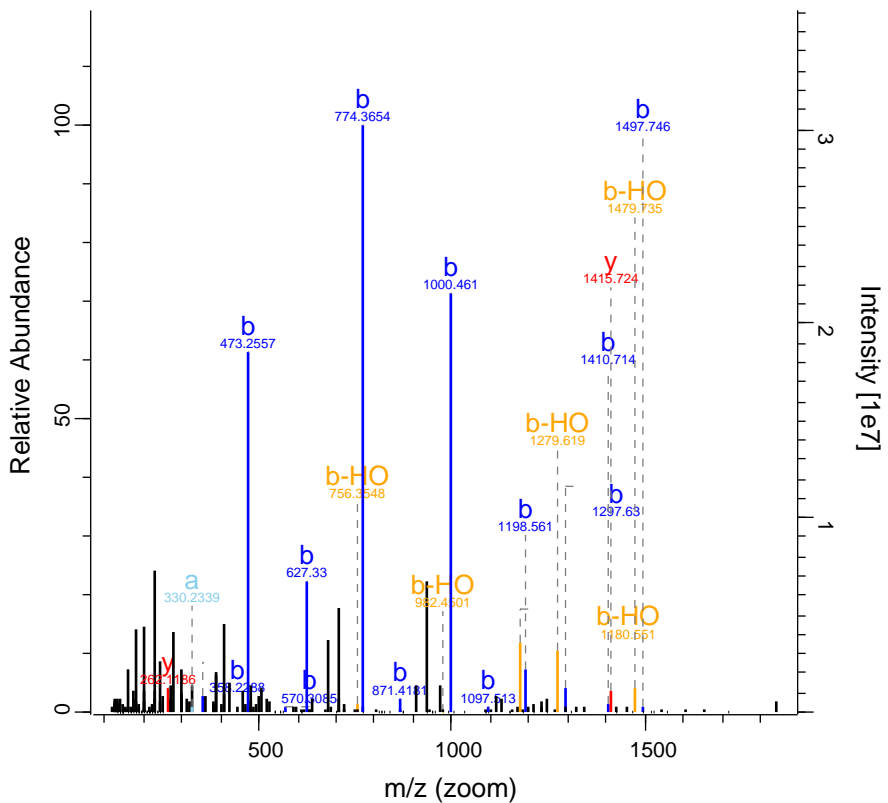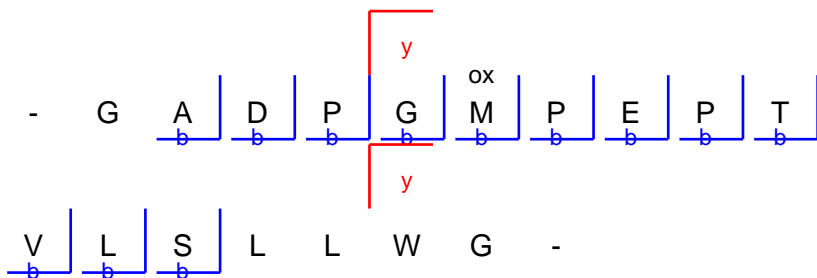

Supplement: mmc16.pdf [file mmc16.pdf]
